# Supplementary material
Source: publisher site journal article supplement (https://www.dovepress.com/article/257729)
Supplement: Supplementary file 1 [file get_supplementary_file.php]

**Supplementary file 1**

**Part 1:** The list of primers

**Part 2:** Relative mRNA changes for IQGAP3 and PIK3C2B in CRC cells transfected with the pcDNA3.1-IQGAP3 vector or IQGAP3 siRNA

**Part 3:** The coexpressed genes of IQGAP1

**Part 4:** The coexpressed genes of IQGAP2

**Part 5:** The coexpressed genes of IQGAP3

**Part 1**

| Primer list |                        |                            |
|-------------|------------------------|----------------------------|
| Primer Name | Sequence (5'-3')       | Annealing Temperature (°C) |
| IQGAP1-F    | AGCCGCATTACATGCTGCT    | 55                         |
| IQGAP1-R    | TCAAAGCTGCAAATGTGTCCG  | 55                         |
| IQGAP2-F    | TGTGCCACTTAGAGGAAGCC   | 58                         |
| IQGAP2-R    | GCTCTTAACCACTGGACGGTAT | 58                         |
| IQGAP3-F    | TGACCACTACCTAACTCAGGC  | 55                         |
| IQGAP3-R    | CAGGGCAGGGTCTTGAAGG    | 55                         |
| PIK3C2B-F   | CGACCTCAAGCTGTTACGC    | 58                         |
| PIK3C3B-R   | GAGCCCTCTATGTCCCCTGG   | 58                         |
| GAPDH-F     | CTGGGCTACACTGAGCACC    | 50-60                      |
| GAPDH-R     | AAGTGGTCGTTGAGGGCAATG  | 50-60                      |

## Part 2

The relative mRNA changes of IQGAP3 and PIK3C2B in CRC cells which transfected with pcDNA3.1-IQGAP3 vector or IQGAP3 siRNA.

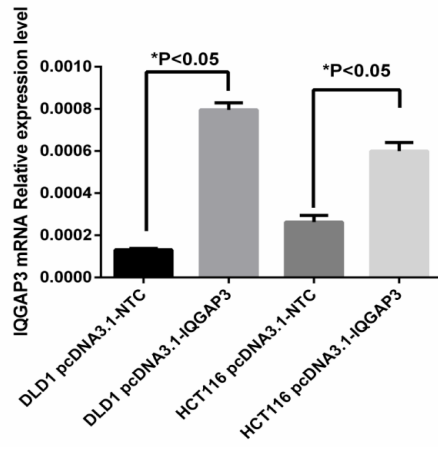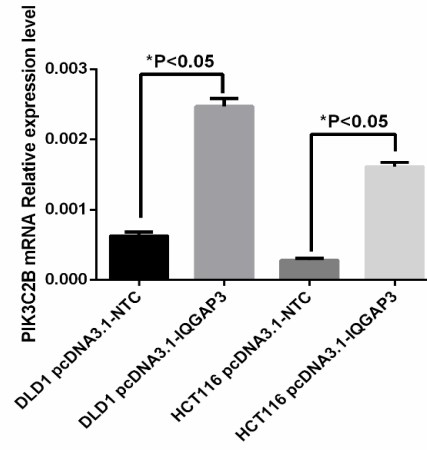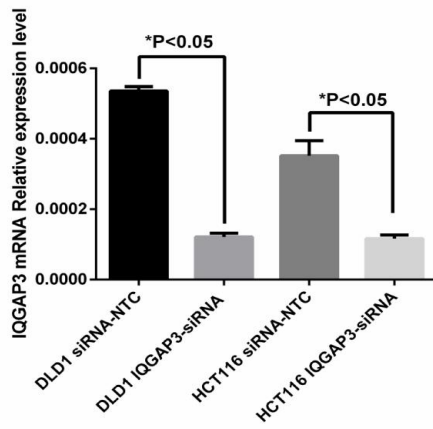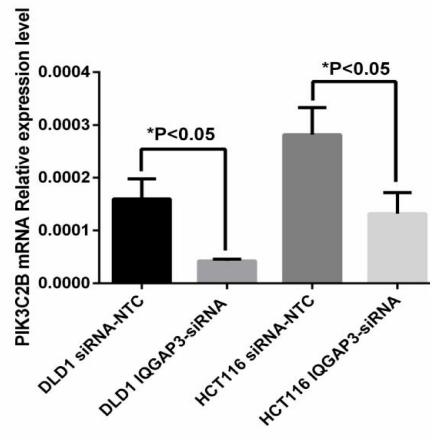

**Part 3****Coexpression genes of IQGAP1 in Colorectal Adenocarcinoma**

| Correlated Gene | Cytoband      | Spearman | p-Value  | q-Value  |
|-----------------|---------------|----------|----------|----------|
| DPP8            | 15q22.31      | 0.630908 | 8.46E-44 | 1.69E-39 |
| TMOD3           | 15q21.2       | 0.621809 | 3.03E-42 | 3.03E-38 |
| SECISBP2L       | 15q21.1       | 0.617585 | 1.53E-41 | 1.02E-37 |
| AKAP13          | 15q25.3       | 0.605278 | 1.51E-39 | 7.54E-36 |
| SPG11           | 15q21.1       | 0.595542 | 4.94E-38 | 1.98E-34 |
| ACBD3           | 1q42.12       | 0.575284 | 4.86E-35 | 1.62E-31 |
| RNF111          | 15q22.1-q22.2 | 0.573392 | 9.03E-35 | 2.58E-31 |
| ADAM10          | 15q21.3       | 0.571651 | 1.59E-34 | 3.98E-31 |
| UBR1            | 15q15.2       | 0.567052 | 6.99E-34 | 1.52E-30 |
| USP8            | 15q21.2       | 0.566786 | 7.61E-34 | 1.52E-30 |
| ZNF593          | 1p36.11       | -0.55941 | 7.76E-33 | 1.41E-29 |
| ROMO1           | 20q11.22      | -0.55735 | 1.47E-32 | 2.46E-29 |
| PEAK1           | 15q24.3       | 0.546508 | 3.95E-31 | 6.09E-28 |
| PIAS1           | 15q23         | 0.533872 | 1.58E-29 | 2.24E-26 |
| TRIP11          | 14q32.12      | 0.533441 | 1.78E-29 | 2.24E-26 |
| MYO9A           | 15q23         | 0.533431 | 1.79E-29 | 2.24E-26 |
| SPRED1          | 15q14         | 0.532598 | 2.27E-29 | 2.67E-26 |
| CSNK1G1         | 15q22.31      | 0.531776 | 2.86E-29 | 3.18E-26 |
| DRAP1           | 11q13.1       | -0.52615 | 1.39E-28 | 1.46E-25 |
| MEF2A           | 15q26.3       | 0.525968 | 1.46E-28 | 1.46E-25 |
| PAM16           | 16p13.3       | -0.5248  | 2.02E-28 | 1.93E-25 |
| ZNF106          | 15q15.1       | 0.523896 | 2.60E-28 | 2.36E-25 |
| AP4E1           | 15q21.2       | 0.521643 | 4.83E-28 | 4.20E-25 |
| MINDY2          | 15q21.3-q22.1 | 0.521389 | 5.18E-28 | 4.32E-25 |
| UQCC3           | 11q12.3       | -0.52045 | 6.69E-28 | 5.36E-25 |
| NUDT1           | 7p22.3        | -0.51919 | 9.43E-28 | 7.26E-25 |
| CCDC186         | 10q25.3       | 0.517874 | 1.35E-27 | 1.00E-24 |
| RFNG            | 17q25.3       | -0.51444 | 3.40E-27 | 2.43E-24 |
| STXBP5          | 6q24.3        | 0.514063 | 3.76E-27 | 2.60E-24 |
| DPM2            | 9q34.11       | -0.51337 | 4.52E-27 | 3.02E-24 |
| FMN1            | 15q13.3       | 0.512492 | 5.72E-27 | 3.69E-24 |
| OXLD1           | 17q25.3       | -0.51172 | 7.01E-27 | 4.38E-24 |
| MALSU1          | 7p15.3        | -0.51162 | 7.21E-27 | 4.38E-24 |
| RNASEH2C        | 11q13.1       | -0.51055 | 9.58E-27 | 5.64E-24 |
| EFL1            | 15q25.2       | 0.510306 | 1.02E-26 | 5.84E-24 |
| GNAQ            | 9q21.2        | 0.509567 | 1.24E-26 | 6.90E-24 |
| EIF6            | 20q11.22      | -0.50835 | 1.71E-26 | 9.24E-24 |
| CHD9            | 16q12.2       | 0.507337 | 2.23E-26 | 1.17E-23 |
| FAU             | 11q13.1       | -0.50708 | 2.38E-26 | 1.22E-23 |
| PFDN6           | 6p21.32       | -0.50671 | 2.62E-26 | 1.31E-23 |
| RPS21           | 20q13.33      | -0.50578 | 3.34E-26 | 1.63E-23 |
| HERC1           | 15q22.31      | 0.505331 | 3.76E-26 | 1.79E-23 |
| MYO1E           | 15q22.2       | 0.504989 | 4.11E-26 | 1.91E-23 |
| PEX16           | 11p11.2       | -0.50457 | 4.57E-26 | 2.08E-23 |
| BUD31           | 7q22.1        | -0.5044  | 4.79E-26 | 2.11E-23 |
| LAMTOR4         | 7q22.1        | -0.50435 | 4.84E-26 | 2.11E-23 |
| SELENOH         | 11q12.1       | -0.50403 | 5.26E-26 | 2.24E-23 |
| LPP             | 3q27.3-q28    | 0.502594 | 7.62E-26 | 3.18E-23 |
| VPS13C          | 15q22.2       | 0.502026 | 8.82E-26 | 3.61E-23 |
| BANF1           | 11q13.1       | -0.50163 | 9.78E-26 | 3.92E-23 |
| UHMK1           | 1q23.3        | 0.501378 | 1.04E-25 | 4.09E-23 |
| SNHG15          | 7p13          | -0.50049 | 1.31E-25 | 5.04E-23 |
| SON             | 21q22.11      | 0.500063 | 1.46E-25 | 5.51E-23 |
| WDR74           | 11q12.3       | -0.49981 | 1.56E-25 | 5.69E-23 |
| MIIP            | 1p36.22       | -0.49979 | 1.56E-25 | 5.69E-23 |

|          |                |          |          |          |
|----------|----------------|----------|----------|----------|
| GTF2A1   | 14q31.1        | 0.499366 | 1.74E-25 | 6.23E-23 |
| IREB2    | 15q25.1        | 0.499068 | 1.88E-25 | 6.61E-23 |
| FEM1B    | 15q23          | 0.4981   | 2.40E-25 | 8.30E-23 |
| SEL1L    | 14q31.1        | 0.497877 | 2.54E-25 | 8.64E-23 |
| PTDSS2   | 11p15.5        | -0.49556 | 4.57E-25 | 1.53E-22 |
| RPLP2    | 11p15.5        | -0.4954  | 4.76E-25 | 1.56E-22 |
| PTPN9    | 15q24.2        | 0.49529  | 4.89E-25 | 1.58E-22 |
| UQCC2    | 6p21.31        | -0.49475 | 5.60E-25 | 1.78E-22 |
| PDRG1    | 20q11.21       | -0.49443 | 6.06E-25 | 1.90E-22 |
| FAM214A  | 15q21.2-q21.3  | 0.494035 | 6.70E-25 | 2.06E-22 |
| CYFIP1   | 15q11.2        | 0.493277 | 8.10E-25 | 2.46E-22 |
| PSMB3    | 17q12          | -0.49298 | 8.72E-25 | 2.61E-22 |
| ZNHIT1   | 7q22.1         | -0.49256 | 9.67E-25 | 2.85E-22 |
| PPP1R35  | 7q22.1         | -0.49181 | 1.17E-24 | 3.38E-22 |
| GET4     | 7p22.3         | -0.4914  | 1.29E-24 | 3.69E-22 |
| MRPS17   | 7p11.2         | -0.49099 | 1.43E-24 | 4.03E-22 |
| NBEAL1   | 2q33.2         | 0.490697 | 1.54E-24 | 4.23E-22 |
| ARIH1    | 15q24.1        | 0.490686 | 1.54E-24 | 4.23E-22 |
| NSUN5    | 7q11.23        | -0.48977 | 1.93E-24 | 5.23E-22 |
| HIPK1    | 1p13.2         | 0.489559 | 2.04E-24 | 5.44E-22 |
| HEATR5A  | 14q12          | 0.489404 | 2.12E-24 | 5.58E-22 |
| AQR      | 15q14          | 0.488549 | 2.61E-24 | 6.80E-22 |
| ETV3     | 1q23.1         | 0.488102 | 2.92E-24 | 7.35E-22 |
| ZNF609   | 15q22.31       | 0.488092 | 2.92E-24 | 7.35E-22 |
| WRAP73   | 1p36.32        | -0.48807 | 2.94E-24 | 7.35E-22 |
| MRPS24   | 7p13           | -0.48701 | 3.82E-24 | 9.43E-22 |
| ARPIN    | 15q26.1        | 0.486804 | 4.01E-24 | 9.79E-22 |
| PSMD13   | 11p15.5        | -0.48651 | 4.30E-24 | 1.04E-21 |
| NPTN     | 15q24.1        | 0.48591  | 4.98E-24 | 1.19E-21 |
| SIN3A    | 15q24.2        | 0.485835 | 5.08E-24 | 1.20E-21 |
| TJP1     | 15q13.1        | 0.485663 | 5.29E-24 | 1.23E-21 |
| TSEN54   | 17q25.1        | -0.48471 | 6.67E-24 | 1.54E-21 |
| BTBD7    | 14q32.12       | 0.483622 | 8.69E-24 | 1.98E-21 |
| POLR2G   | 11q12.3        | -0.48241 | 1.16E-23 | 2.61E-21 |
| PANK3    | 5q34           | 0.482374 | 1.17E-23 | 2.61E-21 |
| POP7     | 7q22.1         | -0.48102 | 1.62E-23 | 3.58E-21 |
| MTMR10   | 15q13.3        | 0.480826 | 1.70E-23 | 3.71E-21 |
| NDUFS8   | 11q13.2        | -0.48072 | 1.75E-23 | 3.77E-21 |
| NDUFA11  | 19p13.3        | -0.48059 | 1.80E-23 | 3.84E-21 |
| ATG4B    | 2q37.3         | -0.47994 | 2.11E-23 | 4.44E-21 |
| DIP2B    | 12q13.12       | 0.479035 | 2.61E-23 | 5.44E-21 |
| BROX     | 1q41           | 0.478998 | 2.64E-23 | 5.44E-21 |
| ARFGEF3  | 6q23.3-q24.1   | 0.477572 | 3.70E-23 | 7.56E-21 |
| ZNF770   | 15q14          | 0.477372 | 3.88E-23 | 7.85E-21 |
| TMEM161A | 19p13.11       | -0.47724 | 4.01E-23 | 8.02E-21 |
| ARHGAP5  | 14q12          | 0.477134 | 4.11E-23 | 8.14E-21 |
| ZNF592   | 15q25.3        | 0.476644 | 4.61E-23 | 8.96E-21 |
| KLF13    | 15q13.3        | 0.476609 | 4.65E-23 | 8.96E-21 |
| ARPP19   | 15q21.2        | 0.476606 | 4.65E-23 | 8.96E-21 |
| CEP350   | 1q25.2         | 0.476363 | 4.93E-23 | 9.40E-21 |
| SLK      | 10q24.33-q25.1 | 0.47589  | 5.51E-23 | 1.04E-20 |
| KDM5B    | 1q32.1         | 0.475026 | 6.75E-23 | 1.26E-20 |
| CCPG1    | 15q21.3        | 0.474915 | 6.93E-23 | 1.28E-20 |
| C9ORF16  | 9q34.11        | -0.47433 | 7.96E-23 | 1.46E-20 |
| C7ORF50  | 7p22.3         | -0.47409 | 8.41E-23 | 1.53E-20 |
| SEC24A   | 5q31.1         | 0.473979 | 8.63E-23 | 1.56E-20 |
| COPS9    | 2q37.3         | -0.47381 | 8.97E-23 | 1.60E-20 |
| CBX8     | 17q25.3        | -0.47338 | 9.93E-23 | 1.76E-20 |

|            |          |          |          |          |
|------------|----------|----------|----------|----------|
| OTUB1      | 11q13.1  | -0.47261 | 1.19E-22 | 2.09E-20 |
| UBE3A      | 15q11.2  | 0.472221 | 1.30E-22 | 2.27E-20 |
| KLHL20     | 1q25.1   | 0.472042 | 1.36E-22 | 2.34E-20 |
| ATF6       | 1q23.3   | 0.471809 | 1.43E-22 | 2.45E-20 |
| PSMG4      | 6p25.2   | -0.47103 | 1.72E-22 | 2.92E-20 |
| AUP1       | 2p13.1   | -0.46995 | 2.20E-22 | 3.71E-20 |
| DPH7       | 9q34.3   | -0.46979 | 2.29E-22 | 3.82E-20 |
| GPS1       | 17q25.3  | -0.4693  | 2.56E-22 | 4.24E-20 |
| CHCHD6     | 3q21.3   | -0.46864 | 2.98E-22 | 4.90E-20 |
| PSMG3      | 7p22.3   | -0.4686  | 3.01E-22 | 4.91E-20 |
| LAGE3      | Xq28     | -0.46842 | 3.14E-22 | 5.07E-20 |
| NSUN5P1    | 7q11.23  | -0.4682  | 3.30E-22 | 5.29E-20 |
| RAD9A      | 11q13.2  | -0.46765 | 3.74E-22 | 5.95E-20 |
| MIA3       | 1q41     | 0.467259 | 4.10E-22 | 6.46E-20 |
| LRCH3      | 3q29     | 0.466775 | 4.58E-22 | 7.16E-20 |
| SAC3D1     | 11q13.1  | -0.46627 | 5.14E-22 | 7.99E-20 |
| HECTD1     | 14q12    | 0.466174 | 5.25E-22 | 8.09E-20 |
| FNIP2      | 4q32.1   | 0.465819 | 5.70E-22 | 8.71E-20 |
| NAA10      | Xq28     | -0.46511 | 6.70E-22 | 1.01E-19 |
| TAOK1      | 17q11.2  | 0.465107 | 6.70E-22 | 1.01E-19 |
| ABHD2      | 15q26.1  | 0.464288 | 8.07E-22 | 1.20E-19 |
| MRTO4      | 1p36.13  | -0.46429 | 8.07E-22 | 1.20E-19 |
| MAN1A2     | 1p12     | 0.464214 | 8.21E-22 | 1.21E-19 |
| CCDC167    | 6p21.2   | -0.4638  | 9.02E-22 | 1.32E-19 |
| EEF1D      | 8q24.3   | -0.46374 | 9.14E-22 | 1.33E-19 |
| CTU2       | 16q24.3  | -0.4637  | 9.22E-22 | 1.33E-19 |
| CRTC3      | 15q26.1  | 0.463201 | 1.03E-21 | 1.48E-19 |
| CASC4      | 15q15.3  | 0.463043 | 1.07E-21 | 1.52E-19 |
| BRMS1      | 11q13.2  | -0.46288 | 1.11E-21 | 1.57E-19 |
| YDJC       | 22q11.21 | -0.46237 | 1.25E-21 | 1.74E-19 |
| EDEM3      | 1q25.3   | 0.461356 | 1.57E-21 | 2.18E-19 |
| THAP3      | 1p36.31  | -0.46124 | 1.61E-21 | 2.22E-19 |
| DENND1B    | 1q31.3   | 0.461044 | 1.68E-21 | 2.30E-19 |
| ANKRD36BP1 | 1q24.2   | 0.460961 | 1.71E-21 | 2.33E-19 |
| TRPM7      | 15q21.2  | 0.459669 | 2.28E-21 | 3.09E-19 |
| LNPEP      | 5q15     | 0.458758 | 2.80E-21 | 3.76E-19 |
| RPUSD1     | 16p13.3  | -0.4586  | 2.90E-21 | 3.87E-19 |
| DENND4A    | 15q22.31 | 0.458433 | 3.01E-21 | 3.99E-19 |
| SCAF11     | 12q12    | 0.457863 | 3.42E-21 | 4.50E-19 |
| DAAM1      | 14q23.1  | 0.457629 | 3.60E-21 | 4.71E-19 |
| POLR2F     | 22q13.1  | -0.45724 | 3.92E-21 | 5.10E-19 |
| GADD45GIP1 | 19p13.13 | -0.45716 | 3.99E-21 | 5.16E-19 |
| TOR1AIP2   | 1q25.2   | 0.456422 | 4.70E-21 | 6.00E-19 |
| LSM10      | 1p34.3   | -0.45642 | 4.71E-21 | 6.00E-19 |
| METTL26    | 16p13.3  | -0.45617 | 4.98E-21 | 6.31E-19 |
| HIPK3      | 11p13    | 0.456013 | 5.15E-21 | 6.49E-19 |
| BTBD1      | 15q25.2  | 0.455707 | 5.51E-21 | 6.90E-19 |
| PJA2       | 5q21.3   | 0.4555   | 5.77E-21 | 7.17E-19 |
| NMRAL1     | 16p13.3  | -0.45529 | 6.04E-21 | 7.47E-19 |
| SCAPER     | 15q24.3  | 0.455247 | 6.10E-21 | 7.49E-19 |
| SLC25A39   | 17q21.31 | -0.45516 | 6.22E-21 | 7.60E-19 |
| NUTF2      | 16q22.1  | -0.45412 | 7.82E-21 | 9.49E-19 |
| ASH1L      | 1q22     | 0.453476 | 9.00E-21 | 1.09E-18 |
| TIMM17B    | Xp11.23  | -0.45336 | 9.23E-21 | 1.11E-18 |
| EP300      | 22q13.2  | 0.45303  | 9.92E-21 | 1.18E-18 |
| POLR2I     | 19q13.12 | -0.45216 | 1.20E-20 | 1.42E-18 |
| B3GAT3     | 11q12.3  | -0.45202 | 1.24E-20 | 1.46E-18 |
| CIAO2B     | 16q22.1  | -0.45194 | 1.26E-20 | 1.47E-18 |

|          |             |          |          |          |
|----------|-------------|----------|----------|----------|
| ZNF710   | 15q26.1     | 0.451661 | 1.34E-20 | 1.56E-18 |
| MCTP2    | 15q26.2     | 0.451603 | 1.35E-20 | 1.57E-18 |
| TAF10    | 11p15.4     | -0.45142 | 1.41E-20 | 1.62E-18 |
| KIAA1671 | 22q11.23    | 0.451362 | 1.43E-20 | 1.63E-18 |
| TIMM10   | 11q12.1     | -0.45126 | 1.46E-20 | 1.66E-18 |
| DYRK2    | 12q15       | 0.450817 | 1.61E-20 | 1.82E-18 |
| TMEM223  | 11q12.3     | -0.45065 | 1.67E-20 | 1.88E-18 |
| NSUN5P2  | 7q11.23     | -0.45047 | 1.73E-20 | 1.94E-18 |
| SEM1     | 7q21.3      | -0.45036 | 1.77E-20 | 1.97E-18 |
| RALY     | 20q11.22    | -0.44976 | 2.02E-20 | 2.23E-18 |
| TIMM44   | 19p13.2     | -0.44962 | 2.08E-20 | 2.29E-18 |
| ZNF774   | 15q26.1     | 0.44953  | 2.12E-20 | 2.32E-18 |
| AFF4     | 5q31.1      | 0.449361 | 2.20E-20 | 2.40E-18 |
| MRPL48   | 11q13.4     | -0.44886 | 2.45E-20 | 2.66E-18 |
| NDUFAB8  | 17q25.3     | -0.44883 | 2.47E-20 | 2.66E-18 |
| SCAND1   | 20q11.23    | -0.44864 | 2.57E-20 | 2.75E-18 |
| PRKAR1A  | 17q24.2     | 0.447938 | 2.99E-20 | 3.19E-18 |
| MRPL36   | 5p15.33     | -0.44741 | 3.35E-20 | 3.55E-18 |
| PPAN     | 19p13.2     | -0.44732 | 3.42E-20 | 3.61E-18 |
| ANAPC11  | 17q25.3     | -0.44708 | 3.60E-20 | 3.77E-18 |
| SPATA33  | 16q24.3     | -0.447   | 3.67E-20 | 3.82E-18 |
| ANKRD19P | 9q22.31     | -0.44698 | 3.68E-20 | 3.82E-18 |
| CPSF4    | 7q22.1      | -0.44676 | 3.86E-20 | 3.98E-18 |
| TET2     | 4q24        | 0.446622 | 3.97E-20 | 4.08E-18 |
| MAP3K2   | 2q14.3      | 0.446056 | 4.48E-20 | 4.58E-18 |
| CCDC84   | 11q23.3     | -0.44575 | 4.79E-20 | 4.87E-18 |
| MRPL57   | 13q12.11    | -0.44532 | 5.24E-20 | 5.30E-18 |
| REST     | 4q12        | 0.445158 | 5.43E-20 | 5.46E-18 |
| EGLN1    | 1q42.2      | 0.445051 | 5.56E-20 | 5.56E-18 |
| CUTA     | 6p21.32     | -0.44483 | 5.82E-20 | 5.80E-18 |
| NCOA4    | 10q11.22    | 0.4448   | 5.86E-20 | 5.81E-18 |
| DNPEP    | 2q35        | -0.44475 | 5.93E-20 | 5.85E-18 |
| UBL5     | 19p13.2     | -0.44466 | 6.03E-20 | 5.92E-18 |
| CHCHD2   | 7p11.2      | -0.44443 | 6.34E-20 | 6.19E-18 |
| REX1BD   | 19p13.11    | -0.44394 | 7.03E-20 | 6.84E-18 |
| TOMM34   | 20q13.12    | -0.44372 | 7.37E-20 | 7.13E-18 |
| FAHD2A   | 2q11.1      | -0.4425  | 9.55E-20 | 9.19E-18 |
| ZNF654   | 3p11.1      | 0.442426 | 9.70E-20 | 9.29E-18 |
| DXO      | 6p21.33     | -0.44159 | 1.16E-19 | 1.10E-17 |
| SNRPD2   | 19q13.32    | -0.44157 | 1.16E-19 | 1.10E-17 |
| SRM      | 1p36.22     | -0.44141 | 1.20E-19 | 1.13E-17 |
| FRMD4B   | 3p14.1      | 0.441409 | 1.20E-19 | 1.13E-17 |
| YLPM1    | 14q24.3     | 0.441296 | 1.23E-19 | 1.15E-17 |
| RPP21    | 6p22.1      | -0.4411  | 1.28E-19 | 1.19E-17 |
| NCOR1    | 17p12-p11.2 | 0.440812 | 1.36E-19 | 1.26E-17 |
| EBPL     | 13q14.2     | -0.4408  | 1.37E-19 | 1.26E-17 |
| AHCY     | 20q11.22    | -0.44077 | 1.37E-19 | 1.26E-17 |
| NEDD9    | 6p24.2      | 0.440363 | 1.50E-19 | 1.37E-17 |
| ZMYND19  | 9q34.3      | -0.44003 | 1.60E-19 | 1.46E-17 |
| AURKAIP1 | 1p36.33     | -0.44002 | 1.61E-19 | 1.46E-17 |
| FGD4     | 12p11.21    | 0.439964 | 1.63E-19 | 1.47E-17 |
| SPTLC2   | 14q24.3     | 0.439901 | 1.65E-19 | 1.48E-17 |
| LATS1    | 6q25.1      | 0.439584 | 1.76E-19 | 1.58E-17 |
| NR2C2AP  | 19p13.11    | -0.43953 | 1.78E-19 | 1.59E-17 |
| CPNE7    | 16q24.3     | -0.4386  | 2.17E-19 | 1.92E-17 |
| ELOF1    | 19p13.2     | -0.43828 | 2.31E-19 | 2.04E-17 |
| BOLA2    | 16p11.2     | -0.43823 | 2.34E-19 | 2.05E-17 |
| GNB1L    | 22q11.21    | -0.43802 | 2.45E-19 | 2.14E-17 |

|               |              |          |          |          |
|---------------|--------------|----------|----------|----------|
| SMCHD1        | 18p11.32     | 0.437351 | 2.81E-19 | 2.44E-17 |
| MRPL11        | 11q13.2      | -0.43697 | 3.04E-19 | 2.63E-17 |
| RREB1         | 6p24.3       | 0.436747 | 3.18E-19 | 2.75E-17 |
| NUBP2         | 16p13.3      | -0.43667 | 3.23E-19 | 2.78E-17 |
| ARNT          | 1q21.3       | 0.436621 | 3.27E-19 | 2.80E-17 |
| SGMS2         | 4q25         | 0.436445 | 3.39E-19 | 2.89E-17 |
| ATP5MG        | 11q23.3      | -0.43636 | 3.45E-19 | 2.93E-17 |
| CCDC124       | 19p13.11     | -0.43628 | 3.51E-19 | 2.96E-17 |
| RNASEL        | 1q25.3       | 0.436217 | 3.55E-19 | 2.99E-17 |
| PDLIM5        | 4q22.3       | 0.436127 | 3.62E-19 | 3.03E-17 |
| PAXX          | 9q34.3       | -0.43601 | 3.71E-19 | 3.09E-17 |
| AHNAK         | 11q12.3      | 0.435955 | 3.75E-19 | 3.12E-17 |
| TMEM160       | 19q13.32     | -0.43586 | 3.83E-19 | 3.17E-17 |
| PPIH          | 1p34.2       | -0.43566 | 3.99E-19 | 3.29E-17 |
| NDUFB10       | 16p13.3      | -0.43528 | 4.31E-19 | 3.54E-17 |
| SHOC2         | 10q25.2      | 0.434458 | 5.11E-19 | 4.17E-17 |
| MRPS15        | 1p34.3       | -0.43445 | 5.12E-19 | 4.17E-17 |
| GNPTAB        | 12q23.2      | 0.433367 | 6.39E-19 | 5.16E-17 |
| LBHD1         | 11q12.3      | -0.43336 | 6.39E-19 | 5.16E-17 |
| PSMB7         | 9q33.3       | -0.43311 | 6.74E-19 | 5.42E-17 |
| UBE2Q2        | 15q24.2      | 0.432759 | 7.23E-19 | 5.80E-17 |
| BRAT1         | 7p22.3       | -0.43251 | 7.61E-19 | 6.07E-17 |
| NDUFS6        | 5p15.33      | -0.43244 | 7.72E-19 | 6.13E-17 |
| SNHG17        | 20q11.23     | -0.4324  | 7.78E-19 | 6.16E-17 |
| ROCK1         | 18q11.1      | 0.432284 | 7.97E-19 | 6.29E-17 |
| LRRK1         | 15q26.3      | 0.432259 | 8.01E-19 | 6.29E-17 |
| HMBS          | 11q23.3      | -0.43222 | 8.08E-19 | 6.32E-17 |
| TALDO1        | 11p15.5      | -0.43219 | 8.12E-19 | 6.33E-17 |
| CAPN10        | 2q37.3       | -0.43215 | 8.20E-19 | 6.36E-17 |
| MRPS34        | 16p13.3      | -0.43204 | 8.38E-19 | 6.48E-17 |
| CCZ1P-OR7E38P | 7q21.3       | -0.43166 | 9.05E-19 | 6.97E-17 |
| AFF1          | 4q21.3-q22.1 | 0.43158  | 9.21E-19 | 7.05E-17 |
| NDUFB7        | 19p13.12     | -0.43157 | 9.22E-19 | 7.05E-17 |
| UBE2C         | 20q13.12     | -0.43155 | 9.26E-19 | 7.05E-17 |
| SNHG1         | 11q12.3      | -0.43146 | 9.44E-19 | 7.16E-17 |
| LSM4          | 19p13.11     | -0.43141 | 9.54E-19 | 7.21E-17 |
| DGUOK         | 2p13.1       | -0.43134 | 9.67E-19 | 7.28E-17 |
| NHLRC2        | 10q25.3      | 0.431312 | 9.72E-19 | 7.28E-17 |
| MORC3         | 21q22.12     | 0.431304 | 9.74E-19 | 7.28E-17 |
| CD2AP         | 6p12.3       | 0.431212 | 9.92E-19 | 7.39E-17 |
| RTF1          | 15q15.1      | 0.43112  | 1.01E-18 | 7.50E-17 |
| JAK1          | 1p31.3       | 0.430775 | 1.08E-18 | 8.01E-17 |
| COMMD5        | 8q24.3       | -0.43068 | 1.11E-18 | 8.14E-17 |
| RRP9          | 3p21.2       | -0.43059 | 1.12E-18 | 8.23E-17 |
| EXOSC4        | 8q24.3       | -0.43059 | 1.13E-18 | 8.23E-17 |
| VCL           | 10q22.2      | 0.430525 | 1.14E-18 | 8.31E-17 |
| ARID4B        | 1q42.3       | 0.430459 | 1.16E-18 | 8.39E-17 |
| MYO5C         | 15q21.2      | 0.430418 | 1.17E-18 | 8.43E-17 |
| SLC35C2       | 20q13.12     | -0.43028 | 1.20E-18 | 8.64E-17 |
| CENPX         | 17q25.3      | -0.4301  | 1.24E-18 | 8.92E-17 |
| SP1           | 12q13.13     | 0.430075 | 1.25E-18 | 8.94E-17 |
| TRMT1         | 19p13.13     | -0.43003 | 1.26E-18 | 8.98E-17 |
| GSS           | 20q11.22     | -0.42992 | 1.29E-18 | 9.17E-17 |
| TIMM8B        | 11q23.1      | -0.42986 | 1.31E-18 | 9.24E-17 |
| POLR2J        | 7q22.1       | -0.42961 | 1.37E-18 | 9.68E-17 |
| MBNL3         | Xq26.2       | 0.429585 | 1.38E-18 | 9.70E-17 |
| TRMU          | 22q13.31     | -0.42946 | 1.42E-18 | 9.91E-17 |
| MCRIP2        | 16p13.3      | -0.42932 | 1.46E-18 | 1.02E-16 |



|          |                 |          |          |          |
|----------|-----------------|----------|----------|----------|
| PAFAH1B3 | 19q13.2         | -0.42909 | 1.52E-18 | 1.06E-16 |
| MIGA1    | 1p31.1          | 0.429048 | 1.54E-18 | 1.07E-16 |
| FDX2     | 19p13.2         | -0.42892 | 1.58E-18 | 1.09E-16 |
| TMEM208  | 16q22.1         | -0.42855 | 1.70E-18 | 1.17E-16 |
| TMEM138  | 11q12.2         | -0.42808 | 1.87E-18 | 1.28E-16 |
| SPPL2A   | 15q21.2         | 0.428079 | 1.87E-18 | 1.28E-16 |
| TOR1AIP1 | 1q25.2          | 0.427927 | 1.93E-18 | 1.31E-16 |
| C19ORF53 | 19p13.13        | -0.42777 | 1.99E-18 | 1.35E-16 |
| POLR2A   | 17p13.1         | 0.427697 | 2.02E-18 | 1.37E-16 |
| BCS1L    | 2q35            | -0.42767 | 2.03E-18 | 1.37E-16 |
| EMG1     | 12p13.31        | -0.42741 | 2.14E-18 | 1.44E-16 |
| COA4     | 11q13.4         | -0.42722 | 2.22E-18 | 1.49E-16 |
| LCOR     | 10q24.1         | 0.427186 | 2.24E-18 | 1.49E-16 |
| BUD23    | 7q11.23         | -0.42689 | 2.38E-18 | 1.58E-16 |
| VPS4B    | 18q21.33        | 0.426799 | 2.42E-18 | 1.60E-16 |
| MFSD6    | 2q32.2          | 0.426581 | 2.53E-18 | 1.67E-16 |
| PEX14    | 1p36.22         | -0.42625 | 2.70E-18 | 1.78E-16 |
| MFAP3    | 5q33.2          | 0.426209 | 2.72E-18 | 1.79E-16 |
| PRKRIP1  | 7q22.1          | -0.42617 | 2.74E-18 | 1.80E-16 |
| CDK5RAP1 | 20q11.21        | -0.42612 | 2.77E-18 | 1.81E-16 |
| ATP6V1F  | 7q32.1          | -0.42588 | 2.91E-18 | 1.89E-16 |
| RABGAP1L | 1q25.1          | 0.425812 | 2.95E-18 | 1.91E-16 |
| RABEPK   | 9q33.3          | -0.42518 | 3.35E-18 | 2.16E-16 |
| PIGU     | 20q11.22        | -0.42504 | 3.44E-18 | 2.22E-16 |
| CCDC86   | 11q12.2         | -0.42471 | 3.67E-18 | 2.36E-16 |
| CPEB3    | 10q23.32        | 0.424613 | 3.75E-18 | 2.40E-16 |
| ARF5     | 7q32.1          | -0.42438 | 3.92E-18 | 2.50E-16 |
| SLC24A1  | 15q22.31        | 0.424349 | 3.95E-18 | 2.51E-16 |
| NME1     | 17q21.33        | -0.4243  | 3.99E-18 | 2.53E-16 |
| IRF6     | 1q32.2          | 0.424205 | 4.06E-18 | 2.57E-16 |
| TMUB1    | 7q36.1          | -0.42408 | 4.16E-18 | 2.62E-16 |
| PTGES2   | 9q34.11         | -0.42406 | 4.18E-18 | 2.63E-16 |
| MYOF     | 10q23.33        | 0.423991 | 4.24E-18 | 2.65E-16 |
| COPS6    | 7q22.1          | -0.42392 | 4.30E-18 | 2.68E-16 |
| RAB27A   | 15q21.3         | 0.423857 | 4.35E-18 | 2.71E-16 |
| COPRS    | 17q11.2         | -0.42382 | 4.39E-18 | 2.72E-16 |
| RPL13    | 16q24.3 17p11.2 | -0.42348 | 4.69E-18 | 2.90E-16 |
| PQBP1    | Xp11.23         | -0.42344 | 4.73E-18 | 2.91E-16 |
| KAT6B    | 10q22.2         | 0.423431 | 4.74E-18 | 2.91E-16 |
| ADRM1    | 20q13.33        | -0.42317 | 4.99E-18 | 3.06E-16 |
| DDX56    | 7p13            | -0.42311 | 5.05E-18 | 3.08E-16 |
| PPM1L    | 3q25.33-q26.1   | 0.423095 | 5.06E-18 | 3.08E-16 |
| TRIP12   | 2q36.3          | 0.422905 | 5.26E-18 | 3.19E-16 |
| SLC12A6  | 15q14           | 0.422881 | 5.28E-18 | 3.20E-16 |
| ATP11B   | 3q26.33         | 0.422812 | 5.36E-18 | 3.23E-16 |
| MPLKIP   | 7p14.1          | -0.4227  | 5.48E-18 | 3.30E-16 |
| TIMM50   | 19q13.2         | -0.42264 | 5.55E-18 | 3.32E-16 |
| INO80B   | 2p13.1          | -0.42262 | 5.56E-18 | 3.33E-16 |
| NUMB     | 14q24.2-q24.3   | 0.422444 | 5.76E-18 | 3.43E-16 |
| IL6ST    | 5q11.2          | 0.422366 | 5.85E-18 | 3.48E-16 |
| NDUFA13  | 19p13.11        | -0.42227 | 5.97E-18 | 3.54E-16 |
| ASAP2    | 2p25.1 2p24     | 0.42189  | 6.43E-18 | 3.80E-16 |
| CLOCK    | 4q12            | 0.421837 | 6.49E-18 | 3.83E-16 |
| DGKZ     | 11p11.2         | -0.42175 | 6.61E-18 | 3.88E-16 |
| POLR2H   | 3q27.1          | -0.42169 | 6.69E-18 | 3.92E-16 |
| ARL16    | 17q25.3         | -0.4216  | 6.80E-18 | 3.97E-16 |
| TRMT112  | 11q13.1         | -0.42125 | 7.29E-18 | 4.24E-16 |
| IFRD2    | 3p21.31         | -0.42123 | 7.32E-18 | 4.25E-16 |

|           |                     |          |          |          |
|-----------|---------------------|----------|----------|----------|
| DTYMK     | 2q37.3              | -0.42072 | 8.10E-18 | 4.69E-16 |
| HAUS7     | Xq28                | -0.42064 | 8.23E-18 | 4.75E-16 |
| STAG1     | 3q22.3              | 0.420336 | 8.73E-18 | 5.02E-16 |
| SMIM4     | 3p21.1              | -0.42008 | 9.18E-18 | 5.27E-16 |
| SNRPC     | 6p21.31             | -0.41987 | 9.55E-18 | 5.47E-16 |
| SYNJ1     | 21q22.11            | 0.419834 | 9.63E-18 | 5.49E-16 |
| PRRC1     | 5q23.2              | 0.419766 | 9.76E-18 | 5.55E-16 |
| INO80E    | 16p11.2             | -0.41962 | 1.00E-17 | 5.69E-16 |
| PSMA7     | 20q13.33            | -0.41951 | 1.03E-17 | 5.80E-16 |
| MRPL12    | 17q25.3             | -0.41947 | 1.03E-17 | 5.84E-16 |
| PIK3C2B   | 1q32.1              | 0.419414 | 1.05E-17 | 5.87E-16 |
| LAMC2     | 1q25.3              | 0.419408 | 1.05E-17 | 5.87E-16 |
| ASB7      | 15q26.3             | 0.419322 | 1.06E-17 | 5.95E-16 |
| PRDX1     | 1p34.1              | -0.41929 | 1.07E-17 | 5.98E-16 |
| MRPL53    | 2p13.1              | -0.41911 | 1.11E-17 | 6.15E-16 |
| PPP2R3B   | Xp22.33 and Yp11.31 | -0.41911 | 1.11E-17 | 6.15E-16 |
| ATE1      | 10q26.13            | 0.418833 | 1.17E-17 | 6.48E-16 |
| HM13      | 20q11.21            | -0.41879 | 1.18E-17 | 6.52E-16 |
| TAZ       | Xq28                | -0.41841 | 1.27E-17 | 7.00E-16 |
| WDR7      | 18q21.31            | 0.418399 | 1.27E-17 | 7.00E-16 |
| CTTNBP2NL | 1p13.2              | 0.418285 | 1.30E-17 | 7.13E-16 |
| MARF1     | 16p13.11            | 0.418159 | 1.34E-17 | 7.29E-16 |
| PCGF1     | 2p13.1              | -0.41759 | 1.49E-17 | 8.12E-16 |
| TMEM87A   | 15q15.1             | 0.417572 | 1.50E-17 | 8.13E-16 |
| GANC      | 15q15.1             | 0.417528 | 1.51E-17 | 8.18E-16 |
| CYHR1     | 8q24.3              | -0.41738 | 1.56E-17 | 8.40E-16 |
| TMEM234   | 1p35.2              | -0.41721 | 1.61E-17 | 8.65E-16 |
| NAT9      | 17q25.1             | -0.41714 | 1.63E-17 | 8.75E-16 |
| ERGIC3    | 20q11.22            | -0.41684 | 1.73E-17 | 9.25E-16 |
| MICOS13   | 19p13.3             | -0.41617 | 1.97E-17 | 1.05E-15 |
| NDUFB9    | 8q24.13             | -0.41608 | 2.00E-17 | 1.07E-15 |
| RPL35     | 9q33.3              | -0.41589 | 2.08E-17 | 1.10E-15 |
| DDX49     | 19p13.11            | -0.41575 | 2.13E-17 | 1.13E-15 |
| ATP5F1E   | 20q13.32            | -0.41566 | 2.17E-17 | 1.15E-15 |
| SDHAF2    | 11q12.2             | -0.41565 | 2.17E-17 | 1.15E-15 |
| MPP5      | 14q23.3             | 0.415507 | 2.23E-17 | 1.17E-15 |
| NECAB3    | 20q11.22            | -0.41542 | 2.27E-17 | 1.19E-15 |
| SLTM      | 15q22.1             | 0.415326 | 2.31E-17 | 1.21E-15 |
| ENTR1     | 9q34.3              | -0.41506 | 2.44E-17 | 1.27E-15 |
| KRAS      | 12p12.1             | 0.414883 | 2.52E-17 | 1.31E-15 |
| AIP       | 11q13.2             | -0.41488 | 2.52E-17 | 1.31E-15 |
| SS18L2    | 3p22.1              | -0.41472 | 2.60E-17 | 1.35E-15 |
| RASA1     | 5q14.3              | 0.414711 | 2.61E-17 | 1.35E-15 |
| SOS2      | 14q21.3             | 0.414616 | 2.65E-17 | 1.37E-15 |
| FCHO2     | 5q13.2              | 0.414593 | 2.67E-17 | 1.37E-15 |
| TRAPPC2L  | 16q24.3             | -0.41421 | 2.87E-17 | 1.47E-15 |
| N4BP2     | 4p14                | 0.414052 | 2.96E-17 | 1.51E-15 |
| TFAP4     | 16p13.3             | -0.4137  | 3.17E-17 | 1.61E-15 |
| KLHL28    | 14q21.2             | 0.413675 | 3.18E-17 | 1.62E-15 |
| NABP2     | 12q13.3             | -0.41337 | 3.37E-17 | 1.71E-15 |
| C1ORF159  | 1p36.33             | -0.41274 | 3.80E-17 | 1.92E-15 |
| RPL27A    | 11p15.4             | -0.41264 | 3.88E-17 | 1.96E-15 |
| HIKESHI   | 11q14.2             | -0.41252 | 3.97E-17 | 1.99E-15 |
| RPS3      | 11q13.4             | -0.41252 | 3.97E-17 | 1.99E-15 |
| ACAP2     | 3q29                | 0.41159  | 4.74E-17 | 2.37E-15 |
| ANAPC15   | 11q13.4             | -0.41157 | 4.76E-17 | 2.38E-15 |
| RNF168    | 3q29                | 0.411274 | 5.03E-17 | 2.51E-15 |
| MON2      | 12q14.1             | 0.41125  | 5.06E-17 | 2.51E-15 |

|          |                 |          |          |          |
|----------|-----------------|----------|----------|----------|
| NCOA2    | 8q13.3          | 0.411233 | 5.07E-17 | 2.51E-15 |
| DMXL1    | 5q23.1          | 0.411194 | 5.11E-17 | 2.53E-15 |
| SOS1     | 2p22.1          | 0.410931 | 5.37E-17 | 2.65E-15 |
| ARID2    | 12q12           | 0.410911 | 5.39E-17 | 2.65E-15 |
| ARHGAP21 | 10p12.1 10p12.3 | 0.410795 | 5.51E-17 | 2.71E-15 |
| RPS6KB2  | 11q13.2         | -0.4102  | 6.17E-17 | 3.02E-15 |
| BORCS8   | 19p13.11        | -0.41017 | 6.21E-17 | 3.03E-15 |
| ELOB     | 16p13.3         | -0.41012 | 6.27E-17 | 3.06E-15 |
| ZNRD2    | 11q13.1         | -0.4101  | 6.29E-17 | 3.06E-15 |
| SCAMP2   | 15q24.1         | 0.410063 | 6.34E-17 | 3.07E-15 |
| KIAA0754 | 1p34.3          | 0.409824 | 6.63E-17 | 3.21E-15 |
| PMPCA    | 9q34.3          | -0.4097  | 6.79E-17 | 3.28E-15 |
| ANKRD39  | 2q11.2          | -0.4096  | 6.92E-17 | 3.33E-15 |
| E2F1     | 20q11.22        | -0.40955 | 6.99E-17 | 3.36E-15 |
| PPP2R5E  | 14q23.2         | 0.409492 | 7.06E-17 | 3.38E-15 |
| BPTF     | 17q24.2         | 0.408964 | 7.80E-17 | 3.73E-15 |
| TLN2     | 15q22.2         | 0.408952 | 7.82E-17 | 3.73E-15 |
| INO80    | 15q15.1         | 0.408684 | 8.23E-17 | 3.91E-15 |
| NDUFC2   | 11q14.1         | -0.40867 | 8.25E-17 | 3.92E-15 |
| ANKRD12  | 18p11.22        | 0.408567 | 8.41E-17 | 3.98E-15 |
| SFXN4    | 10q26.11        | -0.40856 | 8.42E-17 | 3.98E-15 |
| RPL8     | 8q24.3          | -0.40855 | 8.44E-17 | 3.98E-15 |
| ZMIZ1    | 10q22.3         | 0.408515 | 8.49E-17 | 3.99E-15 |
| CDC73    | 1q31.2          | 0.40847  | 8.57E-17 | 4.01E-15 |
| ASCL2    | 11p15.5         | -0.40846 | 8.57E-17 | 4.01E-15 |
| MAFG-DT  | 17q25.3         | -0.40837 | 8.72E-17 | 4.07E-15 |
| RFX7     | 15q21.3         | 0.408246 | 8.94E-17 | 4.16E-15 |
| BCL7C    | 16p11.2         | -0.40811 | 9.17E-17 | 4.26E-15 |
| CCDC85B  | 11q13.1         | -0.40784 | 9.65E-17 | 4.47E-15 |
| NOL12    | 22q13.1         | -0.40782 | 9.69E-17 | 4.48E-15 |
| NEK1     | 4q33            | 0.407675 | 9.95E-17 | 4.59E-15 |
| ATAD3B   | 1p36.33         | -0.40757 | 1.02E-16 | 4.68E-15 |
| ARID4A   | 14q23.1         | 0.40751  | 1.03E-16 | 4.71E-15 |
| FBXO44   | 1p36.22         | -0.40749 | 1.03E-16 | 4.72E-15 |
| CARS2    | 13q34           | -0.40747 | 1.03E-16 | 4.73E-15 |
| PDCD6IP  | 3p22.3          | 0.407458 | 1.04E-16 | 4.73E-15 |
| HACD2    | 3q21.1          | 0.407335 | 1.06E-16 | 4.83E-15 |
| MPV17    | 2p23.3          | -0.4072  | 1.09E-16 | 4.94E-15 |
| TPRA1    | 3q21.3          | -0.40711 | 1.11E-16 | 5.02E-15 |
| PYCR3    | 8q24.3          | -0.40699 | 1.13E-16 | 5.12E-15 |
| SH3PXD2A | 10q24.33        | 0.406902 | 1.15E-16 | 5.19E-15 |
| CYP2D7   | 22q13.2         | -0.40688 | 1.15E-16 | 5.20E-15 |
| SDHAF1   | 19q13.12        | -0.4068  | 1.17E-16 | 5.27E-15 |
| PURA     | 5q31.3          | 0.406755 | 1.18E-16 | 5.30E-15 |
| IRF3     | 19q13.33        | -0.40644 | 1.26E-16 | 5.61E-15 |
| SPOUT1   | 9q34.11         | -0.40606 | 1.35E-16 | 6.01E-15 |
| ERI3     | 1p34.1          | -0.40602 | 1.36E-16 | 6.04E-15 |
| POU5F1B  | 8q24.21         | -0.406   | 1.36E-16 | 6.05E-15 |
| FYCO1    | 3p21.31         | 0.405903 | 1.39E-16 | 6.15E-15 |
| NDUFS3   | 11p11.2         | -0.4056  | 1.47E-16 | 6.49E-15 |
| SUSD6    | 14q24.1         | 0.405559 | 1.48E-16 | 6.53E-15 |
| SMYD5    | 2p13.2          | -0.40538 | 1.53E-16 | 6.73E-15 |
| LYRM4    | 6p25.1          | -0.40536 | 1.54E-16 | 6.73E-15 |
| MRPL2    | 6p21.1          | -0.40536 | 1.54E-16 | 6.73E-15 |
| NHP2     | 5q35.3          | -0.40506 | 1.62E-16 | 7.10E-15 |
| SCARNA12 | 12p13.31        | -0.40487 | 1.68E-16 | 7.33E-15 |
| RAB3GAP1 | 2q21.3          | 0.404795 | 1.71E-16 | 7.43E-15 |
| SMPD2    | 6q21            | -0.40473 | 1.73E-16 | 7.50E-15 |

|           |               |          |          |          |
|-----------|---------------|----------|----------|----------|
| GATD1     | 11p15.5       | -0.40445 | 1.82E-16 | 7.89E-15 |
| MAGI1     | 3p14.1        | 0.404297 | 1.87E-16 | 8.10E-15 |
| TUSC2     | 3p21.31       | -0.40398 | 1.99E-16 | 8.58E-15 |
| CLMN      | 14q32.13      | 0.403961 | 1.99E-16 | 8.58E-15 |
| GPRIN3    | 4q22.1        | 0.403916 | 2.01E-16 | 8.64E-15 |
| TNKS2     | 10q23.32      | 0.40372  | 2.08E-16 | 8.94E-15 |
| FLNB      | 3p14.3        | 0.403671 | 2.10E-16 | 8.98E-15 |
| METTL1    | 12q14.1       | -0.40367 | 2.10E-16 | 8.98E-15 |
| EDEM2     | 20q11.22      | -0.40336 | 2.23E-16 | 9.49E-15 |
| SNHG6     | 8q13.1 8q13   | -0.40329 | 2.26E-16 | 9.59E-15 |
| MRPL23    | 11p15.5       | -0.40305 | 2.36E-16 | 1.00E-14 |
| LOC284441 | 19p12         | 0.402865 | 2.44E-16 | 1.03E-14 |
| HRAS      | 11p15.5       | -0.40283 | 2.46E-16 | 1.04E-14 |
| ABT1      | 6p22.2        | -0.40269 | 2.52E-16 | 1.06E-14 |
| THSD4     | 15q23         | 0.402666 | 2.53E-16 | 1.07E-14 |
| MED13L    | 12q24.21      | 0.40258  | 2.57E-16 | 1.08E-14 |
| ZZEF1     | 17p13.2       | 0.402476 | 2.62E-16 | 1.10E-14 |
| CCS       | 11q13.2       | -0.40247 | 2.62E-16 | 1.10E-14 |
| CAND1     | 12q14.3-q15   | 0.402377 | 2.67E-16 | 1.11E-14 |
| ALG3      | 3q27.1        | -0.40232 | 2.70E-16 | 1.12E-14 |
| RPS7      | 2p25.3        | -0.40232 | 2.70E-16 | 1.12E-14 |
| PSMA2     | 7p14.1        | -0.40215 | 2.79E-16 | 1.16E-14 |
| ACOT8     | 20q13.12      | -0.40193 | 2.90E-16 | 1.20E-14 |
| THYN1     | 11q25         | -0.40183 | 2.96E-16 | 1.22E-14 |
| NUDT14    | 14q32.33      | -0.40181 | 2.97E-16 | 1.22E-14 |
| PRRC2C    | 1q24.3        | 0.401812 | 2.97E-16 | 1.22E-14 |
| C12ORF73  | 12q23.3       | -0.40151 | 3.14E-16 | 1.29E-14 |
| RPS10     | 6p21.31       | -0.4014  | 3.20E-16 | 1.31E-14 |
| PPIE      | 1p34.2        | -0.40137 | 3.22E-16 | 1.32E-14 |
| KNL1      | 15q15.1       | 0.401358 | 3.23E-16 | 1.32E-14 |
| CTDSP2    | 15q15.3-q21.1 | 0.40121  | 3.31E-16 | 1.35E-14 |
| GCNT4     | 5q13.3        | 0.401104 | 3.38E-16 | 1.37E-14 |
| FAM98B    | 15q14         | 0.40102  | 3.43E-16 | 1.39E-14 |
| SNHG11    | 20q11.23      | -0.401   | 3.45E-16 | 1.39E-14 |
| SGTA      | 19p13.3       | -0.40077 | 3.59E-16 | 1.45E-14 |
| PSMB4     | 1q21.3        | -0.40065 | 3.67E-16 | 1.48E-14 |
| RNASEH2A  | 19p13.13      | -0.40057 | 3.73E-16 | 1.50E-14 |
| CHD2      | 15q26.1       | 0.400558 | 3.74E-16 | 1.50E-14 |
| MRPL55    | 1q42.13       | -0.4005  | 3.78E-16 | 1.51E-14 |
| RANBP1    | 22q11.21      | -0.40044 | 3.82E-16 | 1.53E-14 |
| FBXO28    | 1q42.11       | 0.400277 | 3.93E-16 | 1.57E-14 |
| PPP1R14B  | 11q13.1       | -0.40025 | 3.95E-16 | 1.57E-14 |
| STUB1     | 16p13.3       | -0.40016 | 4.02E-16 | 1.60E-14 |
| UCHL3     | 13q22.2       | -0.39997 | 4.16E-16 | 1.65E-14 |
| ATP5MF    | 7q22.1        | -0.39988 | 4.23E-16 | 1.67E-14 |
| TMEM30A   | 6q14.1        | 0.39948  | 4.55E-16 | 1.80E-14 |
| MRPL28    | 16p13.3       | -0.39944 | 4.59E-16 | 1.81E-14 |
| GEMIN6    | 2p22.1        | -0.3994  | 4.62E-16 | 1.82E-14 |
| CCNQ      | Xq28          | -0.39936 | 4.66E-16 | 1.83E-14 |
| PUS1      | 12q24.33      | -0.39932 | 4.69E-16 | 1.84E-14 |
| DYNLRB1   | 20q11.22      | -0.39928 | 4.72E-16 | 1.85E-14 |
| CEP97     | 3q12.3        | 0.399216 | 4.78E-16 | 1.87E-14 |
| MIEN1     | 17q12         | -0.39882 | 5.14E-16 | 2.00E-14 |
| RPRD2     | 1q21.2        | 0.398693 | 5.26E-16 | 2.04E-14 |
| ATF7      | 12q13.13      | 0.398624 | 5.32E-16 | 2.07E-14 |
| LSM7      | 19p13.3       | -0.3986  | 5.35E-16 | 2.07E-14 |
| CCNDBP1   | 15q15.2       | 0.39825  | 5.70E-16 | 2.20E-14 |
| RAB24     | 5q35.3        | -0.39806 | 5.90E-16 | 2.28E-14 |

|            |                |          |          |          |
|------------|----------------|----------|----------|----------|
| TMEM258    | 11q12.2        | -0.39789 | 6.09E-16 | 2.34E-14 |
| SSBP4      | 19p13.11       | -0.39786 | 6.12E-16 | 2.35E-14 |
| RPL38      | 17q25.1        | -0.39782 | 6.16E-16 | 2.36E-14 |
| TMEM203    | 9q34.3         | -0.3978  | 6.19E-16 | 2.37E-14 |
| DSC2       | 18q12.1        | 0.397763 | 6.23E-16 | 2.38E-14 |
| WDR83      | 19p13.13       | -0.39759 | 6.42E-16 | 2.45E-14 |
| ABLIM1     | 10q25.3        | 0.397591 | 6.43E-16 | 2.45E-14 |
| DOCK7      | 1p31.3         | 0.397409 | 6.64E-16 | 2.52E-14 |
| SWAP70     | 11p15.4        | 0.397407 | 6.65E-16 | 2.52E-14 |
| NDUFA2     | 5q31.3         | -0.39731 | 6.77E-16 | 2.56E-14 |
| ACTR5      | 20q11.23       | -0.39731 | 6.77E-16 | 2.56E-14 |
| LAMTOR1    | 11q13.4        | -0.39699 | 7.17E-16 | 2.70E-14 |
| SEMA4B     | 15q26.1        | 0.396789 | 7.44E-16 | 2.80E-14 |
| TSSC4      | 11p15.5        | -0.39633 | 8.09E-16 | 3.03E-14 |
| ELMSAN1    | 14q24.3        | 0.396324 | 8.09E-16 | 3.03E-14 |
| EXOC8      | 1q42.2         | 0.396292 | 8.14E-16 | 3.05E-14 |
| SLC25A24   | 1p13.3         | 0.396203 | 8.27E-16 | 3.09E-14 |
| RPL36A     | Xq22.1         | -0.39601 | 8.56E-16 | 3.19E-14 |
| EXOC5      | 14q22.3        | 0.395829 | 8.85E-16 | 3.29E-14 |
| TARSL2     | 15q26.3        | 0.395714 | 9.03E-16 | 3.36E-14 |
| EXOSC5     | 19q13.2        | -0.39556 | 9.28E-16 | 3.44E-14 |
| HMBOX1     | 8p21.1-p12     | 0.39547  | 9.44E-16 | 3.50E-14 |
| PIK3CA     | 3q26.32        | 0.395174 | 9.96E-16 | 3.68E-14 |
| MRGBP      | 20q13.33       | -0.39515 | 1.00E-15 | 3.69E-14 |
| MAP3K5     | 6q23.3         | 0.394925 | 1.04E-15 | 3.83E-14 |
| CPEB2      | 4p15.32        | 0.394879 | 1.05E-15 | 3.86E-14 |
| ANO9       | 11p15.5        | -0.39487 | 1.05E-15 | 3.86E-14 |
| UBAC2      | 13q32.3        | -0.39486 | 1.05E-15 | 3.86E-14 |
| NDUFB11    | Xp11.3         | -0.39483 | 1.06E-15 | 3.87E-14 |
| ZNRD1      | 6p22.1         | -0.39443 | 1.14E-15 | 4.15E-14 |
| KAT2B      | 3p24.3         | 0.394292 | 1.17E-15 | 4.25E-14 |
| COP57B     | 2q37.1         | -0.39427 | 1.17E-15 | 4.26E-14 |
| DNAJC13    | 3q22.1         | 0.394099 | 1.21E-15 | 4.38E-14 |
| ZCCHC2     | 18q21.33       | 0.393938 | 1.24E-15 | 4.51E-14 |
| SNAP23     | 15q15.1-q15.2  | 0.393867 | 1.26E-15 | 4.55E-14 |
| SEC31A     | 4q21.22        | 0.393735 | 1.29E-15 | 4.66E-14 |
| CAST       | 5q15           | 0.393561 | 1.33E-15 | 4.79E-14 |
| WDR26      | 1q42.11-q42.12 | 0.39344  | 1.36E-15 | 4.89E-14 |
| NOSIP      | 19q13.33       | -0.39333 | 1.39E-15 | 4.98E-14 |
| MRPL20-AS1 | 1p36.33        | -0.39322 | 1.42E-15 | 5.07E-14 |
| ZNF281     | 1q32.1         | 0.393148 | 1.43E-15 | 5.13E-14 |
| EPHA4      | 2q36.1         | 0.392829 | 1.52E-15 | 5.42E-14 |
| CDC34      | 19p13.3        | -0.39275 | 1.54E-15 | 5.48E-14 |
| PSMB1      | 6q27           | -0.39271 | 1.55E-15 | 5.51E-14 |
| ALKBH4     | 7q22.1         | -0.3927  | 1.55E-15 | 5.51E-14 |
| RAPGEF6    | 5q31.1         | 0.392697 | 1.55E-15 | 5.51E-14 |
| EBNA1BP2   | 1p34.2         | -0.39267 | 1.56E-15 | 5.52E-14 |
| MSRB1      | 16p13.3        | -0.39259 | 1.59E-15 | 5.60E-14 |
| ILKAP      | 2q37.3         | -0.39237 | 1.65E-15 | 5.81E-14 |
| CENPT      | 16q22.1        | -0.3923  | 1.67E-15 | 5.87E-14 |
| ADAM9      | 8p11.22        | 0.392295 | 1.67E-15 | 5.87E-14 |
| KDM5A      | 12p13.33       | 0.392203 | 1.70E-15 | 5.95E-14 |
| RPS13      | 11p15.1        | -0.39188 | 1.80E-15 | 6.29E-14 |
| MAN2A1     | 5q21.3         | 0.391842 | 1.81E-15 | 6.33E-14 |
| PTPRK      | 6q22.33        | 0.391811 | 1.82E-15 | 6.35E-14 |
| PSENN      | 19q13.12       | -0.39171 | 1.85E-15 | 6.46E-14 |
| UCKL1      | 20q13.33       | -0.39165 | 1.87E-15 | 6.52E-14 |
| MAML2      | 11q21          | 0.391564 | 1.90E-15 | 6.60E-14 |

|          |                 |          |          |          |
|----------|-----------------|----------|----------|----------|
| CAMTA1   | 1p36.31-p36.23  | -0.39154 | 1.91E-15 | 6.62E-14 |
| PABPC1L  | 20q13.12        | -0.39153 | 1.91E-15 | 6.62E-14 |
| MXD3     | 5q35.3          | -0.39114 | 2.05E-15 | 7.08E-14 |
| HSD17B10 | Xp11.22         | -0.39108 | 2.07E-15 | 7.15E-14 |
| EIPR1    | 2p25.3          | -0.39104 | 2.09E-15 | 7.18E-14 |
| PRMT7    | 16q22.1         | -0.39103 | 2.09E-15 | 7.18E-14 |
| CIAO3    | 16p13.3         | -0.39094 | 2.13E-15 | 7.29E-14 |
| ARMC6    | 19p13.11        | -0.39085 | 2.16E-15 | 7.39E-14 |
| PRKAA1   | 5p13.1          | 0.390775 | 2.19E-15 | 7.48E-14 |
| MIB1     | 18q11.2         | 0.390713 | 2.21E-15 | 7.55E-14 |
| CISD3    | 17q12           | -0.39066 | 2.24E-15 | 7.61E-14 |
| BMPR2    | 2q33.1-q33.2    | 0.390639 | 2.24E-15 | 7.63E-14 |
| TRAIP    | 3p21.31         | -0.39061 | 2.25E-15 | 7.65E-14 |
| ATP8B1   | 18q21.31        | 0.390203 | 2.42E-15 | 8.21E-14 |
| TMTC2    | 12q21.31        | 0.390161 | 2.44E-15 | 8.26E-14 |
| FUT11    | 10q22.2         | 0.390078 | 2.48E-15 | 8.36E-14 |
| USE1     | 19p13.11        | -0.39007 | 2.48E-15 | 8.36E-14 |
| NXT1     | 20p11.21        | -0.39    | 2.51E-15 | 8.46E-14 |
| STRN     | 2p22.2          | 0.389955 | 2.53E-15 | 8.51E-14 |
| MFSD3    | 8q24.3          | -0.38993 | 2.55E-15 | 8.54E-14 |
| TMF1     | 3p14.1          | 0.389874 | 2.57E-15 | 8.60E-14 |
| PPP1R12A | 12q21.2-q21.31  | 0.389842 | 2.58E-15 | 8.64E-14 |
| MORF4L1  | 15q25.1         | 0.389647 | 2.67E-15 | 8.93E-14 |
| TRAPPC5  | 19p13.2         | -0.38941 | 2.79E-15 | 9.29E-14 |
| SMUG1    | 12q13.13        | -0.38934 | 2.82E-15 | 9.39E-14 |
| USF3     | 3q13.2          | 0.389267 | 2.86E-15 | 9.50E-14 |
| CSNK2B   | 6p21.33         | -0.38925 | 2.87E-15 | 9.52E-14 |
| EXOSC8   | 13q13.3         | -0.38915 | 2.92E-15 | 9.66E-14 |
| PBRM1    | 3p21.1          | 0.388694 | 3.17E-15 | 1.05E-13 |
| COL4A3BP | 5q13.3          | 0.388675 | 3.18E-15 | 1.05E-13 |
| LMBRD2   | 5p13.2          | 0.38866  | 3.18E-15 | 1.05E-13 |
| MTLN     | 2q13            | -0.38851 | 3.27E-15 | 1.08E-13 |
| SEC23IP  | 10q26.11-q26.12 | 0.3885   | 3.28E-15 | 1.08E-13 |
| UBA52    | 19p13.11        | -0.38843 | 3.32E-15 | 1.09E-13 |
| CDKL5    | Xp22.13         | 0.387988 | 3.58E-15 | 1.17E-13 |
| SNU13    | 22q13.2         | -0.38768 | 3.78E-15 | 1.24E-13 |
| ZPR1     | 11q23.3         | -0.38759 | 3.85E-15 | 1.25E-13 |
| PTPRG    | 3p14.2          | 0.387583 | 3.85E-15 | 1.25E-13 |
| MRPL58   | 17q25.1         | -0.38731 | 4.04E-15 | 1.31E-13 |
| TRIP4    | 15q22.31        | 0.387188 | 4.13E-15 | 1.34E-13 |
| ZC3HC1   | 7q32.2          | -0.38717 | 4.14E-15 | 1.34E-13 |
| PTPN21   | 14q31.3         | 0.387073 | 4.21E-15 | 1.36E-13 |
| TAOK3    | 12q24.23        | 0.386969 | 4.29E-15 | 1.39E-13 |
| DUS1L    | 17q25.3         | -0.38696 | 4.30E-15 | 1.39E-13 |
| RPL11    | 1p36.11         | -0.3869  | 4.34E-15 | 1.40E-13 |
| TTC23    | 15q26.3         | 0.386694 | 4.50E-15 | 1.45E-13 |
| SCYL2    | 12q23.1         | 0.38662  | 4.56E-15 | 1.46E-13 |
| SBNO1    | 12q24.31        | 0.386482 | 4.67E-15 | 1.50E-13 |
| NIT2     | 3q12.2          | -0.38642 | 4.72E-15 | 1.51E-13 |
| JMJD1C   | 10q21.3         | 0.386351 | 4.78E-15 | 1.53E-13 |
| PARK7    | 1p36.23         | -0.3863  | 4.82E-15 | 1.54E-13 |
| P2RY1    | 3q25.2          | 0.386169 | 4.93E-15 | 1.57E-13 |
| REL      | 2p16.1          | 0.386015 | 5.07E-15 | 1.61E-13 |
| FAM114A1 | 4p14            | 0.385994 | 5.09E-15 | 1.61E-13 |
| RASSF6   | 4q13.3          | 0.385897 | 5.17E-15 | 1.64E-13 |
| SOCS6    | 18q22.2         | 0.385791 | 5.27E-15 | 1.67E-13 |
| GTF3C5   | 9q34.13         | -0.38573 | 5.33E-15 | 1.68E-13 |
| HMG20A   | 15q24.3         | 0.385649 | 5.40E-15 | 1.70E-13 |

|              |                |          |          |          |
|--------------|----------------|----------|----------|----------|
| UBXN11       | 1p36.11        | -0.38552 | 5.53E-15 | 1.74E-13 |
| FAM161B      | 14q24.3        | 0.385443 | 5.60E-15 | 1.76E-13 |
| HGH1         | 8q24.3         | -0.38544 | 5.60E-15 | 1.76E-13 |
| PDE8A        | 15q25.3        | 0.385269 | 5.77E-15 | 1.81E-13 |
| REV3L        | 6q21           | 0.38499  | 6.06E-15 | 1.89E-13 |
| ZNF827       | 4q31.21-q31.22 | 0.384982 | 6.07E-15 | 1.89E-13 |
| SLC25A10     | 17q25.3        | -0.38498 | 6.07E-15 | 1.89E-13 |
| STK25        | 2q37.3         | -0.38493 | 6.13E-15 | 1.91E-13 |
| SETX         | 9q34.13        | 0.384865 | 6.19E-15 | 1.93E-13 |
| TENT5A       | 6q14.1         | 0.384827 | 6.23E-15 | 1.94E-13 |
| TMEM222      | 1p36.11        | -0.38476 | 6.31E-15 | 1.96E-13 |
| TMEM101      | 17q21.31       | -0.38457 | 6.52E-15 | 2.02E-13 |
| RPL37A       | 2q35           | -0.38452 | 6.58E-15 | 2.03E-13 |
| NR2F2        | 15q26.2        | 0.384348 | 6.78E-15 | 2.09E-13 |
| SLC25A26     | 3p14.1         | -0.38433 | 6.80E-15 | 2.10E-13 |
| EIF2S2       | 20q11.22       | -0.38413 | 7.04E-15 | 2.17E-13 |
| RBIS         | 8q21.2         | -0.38395 | 7.27E-15 | 2.23E-13 |
| RAB8B        | 15q22.2        | 0.38373  | 7.54E-15 | 2.31E-13 |
| BAZ2B        | 2q24.2         | 0.3837   | 7.58E-15 | 2.32E-13 |
| MAPK1        | 22q11.22       | 0.383619 | 7.69E-15 | 2.35E-13 |
| MLXIPL       | 7q11.23        | -0.38355 | 7.79E-15 | 2.38E-13 |
| MRPS33       | 7q34           | -0.38338 | 8.02E-15 | 2.44E-13 |
| CLIP1        | 12q24.31       | 0.383362 | 8.04E-15 | 2.45E-13 |
| E2F4         | 16q22.1        | -0.38335 | 8.06E-15 | 2.45E-13 |
| SMCR8        | 17p11.2        | 0.38305  | 8.49E-15 | 2.58E-13 |
| SLAIN2       | 4p11           | 0.382864 | 8.77E-15 | 2.66E-13 |
| PIN4         | Xq13.1         | -0.38283 | 8.82E-15 | 2.66E-13 |
| SLC3A2       | 11q12.3        | -0.38283 | 8.82E-15 | 2.66E-13 |
| PRR7         | 5q35.3         | -0.38281 | 8.85E-15 | 2.67E-13 |
| SNHG9        | 16p13.3        | -0.38274 | 8.96E-15 | 2.70E-13 |
| ANKRD50      | 4q28.1         | 0.382646 | 9.10E-15 | 2.74E-13 |
| MRPL14       | 6p21.1         | -0.38263 | 9.12E-15 | 2.74E-13 |
| OTUD7B       | 1q21.2         | 0.382546 | 9.26E-15 | 2.78E-13 |
| BACH1        | 21q21.3        | 0.382476 | 9.37E-15 | 2.81E-13 |
| G3BP2        | 4q21.1         | 0.382417 | 9.47E-15 | 2.83E-13 |
| EPC1         | 10p11.22       | 0.382376 | 9.54E-15 | 2.85E-13 |
| PRR5         | 22q13.31       | -0.38229 | 9.69E-15 | 2.89E-13 |
| SMAD2        | 18q21.1        | 0.382258 | 9.73E-15 | 2.90E-13 |
| LOC100129034 | 9q33.3         | 0.382136 | 9.94E-15 | 2.95E-13 |
| FBXW9        | 19p13.13       | -0.38199 | 1.02E-14 | 3.03E-13 |
| ZDHHC24      | 11q13.2        | -0.38193 | 1.03E-14 | 3.05E-13 |
| COA1         | 7p13           | -0.38185 | 1.04E-14 | 3.09E-13 |
| TAF6L        | 11q12.3        | -0.38183 | 1.05E-14 | 3.10E-13 |
| ZBTB37       | 1q25.1         | 0.381468 | 1.12E-14 | 3.29E-13 |
| CRIM1        | 2p22.2         | 0.381347 | 1.14E-14 | 3.35E-13 |
| NOP16        | 5q35.2         | -0.38135 | 1.14E-14 | 3.35E-13 |
| TLE4         | 9q21.31        | 0.381209 | 1.17E-14 | 3.42E-13 |
| MAPRE2       | 18q12.1-q12.2  | 0.381202 | 1.17E-14 | 3.42E-13 |
| UBXN1        | 11q12.3        | -0.38117 | 1.17E-14 | 3.44E-13 |
| NELFE        | 6p21.33        | -0.38116 | 1.18E-14 | 3.44E-13 |
| RPL27        | 17q21.31       | -0.38115 | 1.18E-14 | 3.44E-13 |
| MAP2K1       | 15q22.31       | 0.381048 | 1.20E-14 | 3.50E-13 |
| DICER1       | 14q32.13       | 0.380992 | 1.21E-14 | 3.52E-13 |
| FAAP20       | 1p36.33        | -0.38088 | 1.23E-14 | 3.59E-13 |
| RNF181       | 2p11.2         | -0.3808  | 1.25E-14 | 3.63E-13 |
| COX5B        | 2q11.2         | -0.38061 | 1.29E-14 | 3.74E-13 |
| ARRDC4       | 15q26.2        | 0.380608 | 1.29E-14 | 3.74E-13 |
| MACROD1      | 11q13.1        | -0.3806  | 1.29E-14 | 3.74E-13 |

|          |               |          |          |          |
|----------|---------------|----------|----------|----------|
| LYPLA2   | 1p36.11       | -0.38038 | 1.34E-14 | 3.88E-13 |
| RNPS1    | 16p13.3       | -0.38035 | 1.35E-14 | 3.90E-13 |
| PCID2    | 13q34         | -0.38025 | 1.37E-14 | 3.95E-13 |
| ASPSCR1  | 17q25.3       | -0.38022 | 1.38E-14 | 3.97E-13 |
| SLC41A2  | 12q23.3       | 0.380192 | 1.39E-14 | 3.99E-13 |
| CAMSAP2  | 1q32.1        | 0.380171 | 1.39E-14 | 3.99E-13 |
| WHAMM    | 15q25.2       | 0.380067 | 1.42E-14 | 4.06E-13 |
| SSNA1    | 9q34.3        | -0.38001 | 1.43E-14 | 4.09E-13 |
| CDK5     | 7q36.1        | -0.37988 | 1.47E-14 | 4.18E-13 |
| SIRT1    | 10q21.3       | 0.379872 | 1.47E-14 | 4.18E-13 |
| PPTC7    | 12q24.11      | 0.379818 | 1.48E-14 | 4.21E-13 |
| SLC2A13  | 12q12         | 0.379713 | 1.51E-14 | 4.28E-13 |
| MECOM    | 3q26.2        | 0.379699 | 1.51E-14 | 4.29E-13 |
| CBLB     | 3q13.11       | 0.379362 | 1.60E-14 | 4.53E-13 |
| ZFP91    | 11q12.1       | 0.379058 | 1.69E-14 | 4.77E-13 |
| PTPMT1   | 11p11.2       | -0.37889 | 1.73E-14 | 4.90E-13 |
| MLST8    | 16p13.3       | -0.37882 | 1.76E-14 | 4.95E-13 |
| PAFAH1B1 | 17p13.3       | 0.378738 | 1.78E-14 | 5.01E-13 |
| QSOX1    | 1q25.2        | 0.378731 | 1.78E-14 | 5.01E-13 |
| LRRFIP1  | 2q37.3        | 0.378689 | 1.80E-14 | 5.04E-13 |
| EPG5     | 18q12.3-q21.1 | 0.378664 | 1.80E-14 | 5.06E-13 |
| RFXANK   | 19p13.11      | -0.37858 | 1.83E-14 | 5.13E-13 |
| BMP2K    | 4q21.21       | 0.378564 | 1.83E-14 | 5.13E-13 |
| RPS25    | 11q23.3       | -0.37851 | 1.85E-14 | 5.17E-13 |
| BIRC6    | 2p22.3        | 0.378431 | 1.88E-14 | 5.23E-13 |
| LYST     | 1q42.3        | 0.378404 | 1.89E-14 | 5.25E-13 |
| POLG     | 15q26.1       | 0.378353 | 1.90E-14 | 5.29E-13 |
| EXOSC7   | 3p21.31       | -0.37807 | 1.99E-14 | 5.54E-13 |
| RNF208   | 9q34.3        | -0.37805 | 2.00E-14 | 5.55E-13 |
| RAD23A   | 19p13.13      | -0.37797 | 2.03E-14 | 5.62E-13 |
| SURF2    | 9q34.2        | -0.3779  | 2.05E-14 | 5.67E-13 |
| COMMD6   | 13q22.2       | -0.3779  | 2.05E-14 | 5.67E-13 |
| RPS16    | 19q13.2       | -0.37789 | 2.06E-14 | 5.67E-13 |
| CRK      | 17p13.3       | 0.377886 | 2.06E-14 | 5.67E-13 |
| IKZF2    | 2q34          | 0.377876 | 2.06E-14 | 5.67E-13 |
| ATP2A2   | 12q24.11      | 0.37783  | 2.08E-14 | 5.71E-13 |
| RPS19    | 19q13.2       | -0.37777 | 2.10E-14 | 5.76E-13 |
| NDUFAF7  | 2p22.2        | -0.37772 | 2.12E-14 | 5.80E-13 |
| ZBTB41   | 1q31.3        | 0.377289 | 2.28E-14 | 6.23E-13 |
| SNHG12   | 1p35.3        | -0.37727 | 2.29E-14 | 6.25E-13 |
| ACD      | 16q22.1       | -0.37714 | 2.34E-14 | 6.38E-13 |
| GCC2     | 2q12.3        | 0.377014 | 2.39E-14 | 6.51E-13 |
| OGFOD2   | 12q24.31      | -0.377   | 2.39E-14 | 6.51E-13 |
| DYNC1H1  | 14q32.31      | 0.376951 | 2.41E-14 | 6.56E-13 |
| DDX3X    | Xp11.4        | 0.376943 | 2.42E-14 | 6.56E-13 |
| RASEF    | 9q21.32       | 0.376826 | 2.46E-14 | 6.68E-13 |
| TTBK2    | 15q15.2       | 0.376761 | 2.49E-14 | 6.74E-13 |
| TBRG4    | 7p13          | -0.37676 | 2.49E-14 | 6.74E-13 |
| TSEN34   | 19q13.42      | -0.37671 | 2.51E-14 | 6.78E-13 |
| POMK     | 8p11.21       | 0.376689 | 2.52E-14 | 6.80E-13 |
| MRPS12   | 19q13.2       | -0.3766  | 2.56E-14 | 6.90E-13 |
| POLR2E   | 19p13.3       | -0.37642 | 2.64E-14 | 7.10E-13 |
| KLF3     | 4p14          | 0.376396 | 2.65E-14 | 7.12E-13 |
| TMEM147  | 19q13.12      | -0.37638 | 2.66E-14 | 7.13E-13 |
| GGCT     | 7p14.3        | -0.37637 | 2.66E-14 | 7.13E-13 |
| MAP1LC3A | 20q11.22      | -0.37634 | 2.67E-14 | 7.15E-13 |
| SHROOM3  | 4q21.1        | 0.376334 | 2.68E-14 | 7.15E-13 |
| AP2S1    | 19q13.32      | -0.37631 | 2.69E-14 | 7.17E-13 |



|            |                 |          |          |          |
|------------|-----------------|----------|----------|----------|
| CRYBG3     | 3q11.2          | 0.376216 | 2.73E-14 | 7.27E-13 |
| COMMD7     | 20q11.21        | -0.37621 | 2.73E-14 | 7.27E-13 |
| MTERF3     | 8q22.1          | -0.37596 | 2.85E-14 | 7.58E-13 |
| SF3B5      | 6q24.2          | -0.37592 | 2.87E-14 | 7.62E-13 |
| NSD1       | 5q35.3          | 0.375892 | 2.89E-14 | 7.65E-13 |
| GOLGA4     | 3p22.2          | 0.375779 | 2.94E-14 | 7.78E-13 |
| C19ORF24   | 19p13.3         | -0.37574 | 2.96E-14 | 7.82E-13 |
| CCNT1      | 12q13.11-q13.12 | 0.375671 | 3.00E-14 | 7.91E-13 |
| ZBTB4      | 17p13.1         | 0.375572 | 3.05E-14 | 8.03E-13 |
| CDKN2AIPNL | 5q31.1          | -0.37523 | 3.23E-14 | 8.49E-13 |
| COX4I1     | 16q24.1         | -0.3752  | 3.25E-14 | 8.53E-13 |
| FRS2       | 12q15           | 0.375186 | 3.25E-14 | 8.54E-13 |
| TMEM150A   | 2p11.2          | -0.37516 | 3.27E-14 | 8.57E-13 |
| ZNHIT2     | 11q13.1         | -0.37513 | 3.28E-14 | 8.59E-13 |
| DMXL2      | 15q21.2         | 0.375053 | 3.33E-14 | 8.68E-13 |
| CCNG2      | 4q21.1          | 0.37505  | 3.33E-14 | 8.68E-13 |
| COA3       | 17q21.2         | -0.37504 | 3.33E-14 | 8.68E-13 |
| IBTK       | 6q14.1          | 0.374996 | 3.36E-14 | 8.74E-13 |
| MAPK6      | 15q21.2         | 0.374903 | 3.41E-14 | 8.87E-13 |
| KATNBL1P6  | 6q24.3          | 0.374851 | 3.44E-14 | 8.94E-13 |
| DCXR       | 17q25.3         | -0.37484 | 3.45E-14 | 8.95E-13 |
| ASXL2      | 2p23.3          | 0.374734 | 3.51E-14 | 9.09E-13 |
| EMD        | Xq28            | -0.37454 | 3.62E-14 | 9.38E-13 |
| UQCR11     | 19p13.3         | -0.3745  | 3.65E-14 | 9.43E-13 |
| SPINDOC    | 11q13.1         | -0.37419 | 3.85E-14 | 9.93E-13 |
| RPL18      | 19q13.33        | -0.37415 | 3.87E-14 | 9.98E-13 |
| CHD8       | 14q11.2         | 0.374115 | 3.89E-14 | 1.00E-12 |
| SLC30A1    | 1q32.3          | 0.374095 | 3.91E-14 | 1.00E-12 |
| RALGAPA1   | 14q13.2         | 0.374083 | 3.92E-14 | 1.01E-12 |
| NDUFA3     | 19q13.42        | -0.37408 | 3.92E-14 | 1.01E-12 |
| TRAPPC3    | 1p34.3          | -0.37399 | 3.98E-14 | 1.02E-12 |
| SNRPA      | 19q13.2         | -0.37393 | 4.02E-14 | 1.03E-12 |
| MRPL21     | 11q13.3         | -0.3739  | 4.03E-14 | 1.03E-12 |
| PPIA       | 7p13            | -0.37389 | 4.04E-14 | 1.03E-12 |
| SIGMAR1    | 9p13.3          | -0.37389 | 4.05E-14 | 1.03E-12 |
| ZNF678     | 1q42.13         | 0.373717 | 4.16E-14 | 1.06E-12 |
| G6PC3      | 17q21.31        | -0.3736  | 4.24E-14 | 1.08E-12 |
| NDUFAF2    | 5q12.1          | -0.37352 | 4.30E-14 | 1.09E-12 |
| ITGA2      | 5q11.2          | 0.373442 | 4.36E-14 | 1.11E-12 |
| SPTBN1     | 2p16.2          | 0.373384 | 4.40E-14 | 1.11E-12 |
| STX10      | 19p13.13        | -0.37273 | 4.91E-14 | 1.24E-12 |
| HSPE1      | 2q33.1          | -0.37244 | 5.15E-14 | 1.30E-12 |
| TOMM6      | 6p21.1          | -0.37238 | 5.20E-14 | 1.31E-12 |
| RECQL4     | 8q24.3          | -0.37236 | 5.22E-14 | 1.32E-12 |
| TOMM7      | 7p15.3          | -0.3722  | 5.37E-14 | 1.35E-12 |
| ATOX1      | 5q33.1          | -0.37219 | 5.37E-14 | 1.35E-12 |
| ECE2       | 3q27.1          | -0.37197 | 5.57E-14 | 1.40E-12 |
| YIF1A      | 11q13.2         | -0.37197 | 5.57E-14 | 1.40E-12 |
| ANKRD17    | 4q13.3          | 0.371937 | 5.61E-14 | 1.40E-12 |
| PDE4D      | 5q11.2-q12.1    | 0.371842 | 5.69E-14 | 1.42E-12 |
| CDK10      | 16q24.3         | -0.37184 | 5.70E-14 | 1.42E-12 |
| AP1G1      | 16q22.2         | 0.37181  | 5.73E-14 | 1.43E-12 |
| TRIR       | 19p13.13        | -0.37178 | 5.76E-14 | 1.43E-12 |
| FRK        | 6q22.1          | 0.371607 | 5.92E-14 | 1.47E-12 |
| EXOSC2     | 9q34.12         | -0.37159 | 5.94E-14 | 1.47E-12 |
| ARFRP1     | 20q13.33        | -0.37156 | 5.97E-14 | 1.48E-12 |
| BAZ2A      | 12q13.3         | 0.371416 | 6.11E-14 | 1.52E-12 |
| MAST4      | 5q12.3          | 0.371304 | 6.23E-14 | 1.54E-12 |

|         |               |          |          |          |
|---------|---------------|----------|----------|----------|
| UBE2J2  | 1p36.33       | -0.37122 | 6.32E-14 | 1.56E-12 |
| ZNF462  | 9q31.2        | 0.371184 | 6.35E-14 | 1.57E-12 |
| MRPL17  | 11p15.4       | -0.37117 | 6.37E-14 | 1.57E-12 |
| RNF25   | 2q35          | -0.37113 | 6.41E-14 | 1.58E-12 |
| NSMCE1  | 16p12.1       | -0.37113 | 6.41E-14 | 1.58E-12 |
| KDM3B   | 5q31.2        | 0.370993 | 6.56E-14 | 1.61E-12 |
| LUZP1   | 1p36.12       | 0.370876 | 6.69E-14 | 1.64E-12 |
| NME2    | 17q21.33      | -0.37084 | 6.72E-14 | 1.65E-12 |
| RPL23   | 17q12         | -0.37081 | 6.77E-14 | 1.66E-12 |
| PRDX2   | 19p13.13      | -0.3708  | 6.77E-14 | 1.66E-12 |
| FURIN   | 15q26.1       | 0.370685 | 6.90E-14 | 1.69E-12 |
| REEP3   | 10q21.3       | 0.370603 | 7.00E-14 | 1.71E-12 |
| NAP1L4  | 11p15.4       | -0.37046 | 7.17E-14 | 1.75E-12 |
| MED27   | 9q34.13       | -0.37045 | 7.18E-14 | 1.75E-12 |
| LNPK    | 2q31.1        | 0.370344 | 7.30E-14 | 1.77E-12 |
| GPD2    | 2q24.1        | 0.37033  | 7.32E-14 | 1.77E-12 |
| RYBP    | 3p13          | 0.37033  | 7.32E-14 | 1.77E-12 |
| RTKN    | 2p13.1        | -0.37026 | 7.41E-14 | 1.79E-12 |
| PLCL2   | 3p24.3        | 0.370239 | 7.43E-14 | 1.80E-12 |
| CLCN7   | 16p13.3       | -0.37018 | 7.50E-14 | 1.81E-12 |
| NDUFB2  | 7q34          | -0.37008 | 7.63E-14 | 1.84E-12 |
| TANC2   | 17q23.2-q23.3 | 0.370053 | 7.66E-14 | 1.85E-12 |
| SNRPF   | 12q23.1       | -0.36996 | 7.78E-14 | 1.87E-12 |
| ETV2    | 19q13.12      | -0.3698  | 8.00E-14 | 1.92E-12 |
| RPUSD3  | 3p25.3        | -0.36979 | 8.01E-14 | 1.92E-12 |
| PRDM10  | 11q24.3       | 0.369727 | 8.09E-14 | 1.94E-12 |
| RASA2   | 3q23          | 0.369478 | 8.43E-14 | 2.02E-12 |
| ZNF148  | 3q21.2        | 0.369446 | 8.47E-14 | 2.03E-12 |
| MYH9    | 22q12.3       | 0.36943  | 8.50E-14 | 2.03E-12 |
| RPS20   | 8q12.1        | -0.36941 | 8.52E-14 | 2.03E-12 |
| CENPP   | 9q22.31       | -0.3694  | 8.54E-14 | 2.04E-12 |
| RAB27B  | 18q21.2       | 0.369319 | 8.65E-14 | 2.06E-12 |
| LPGAT1  | 1q32.3        | 0.369272 | 8.72E-14 | 2.07E-12 |
| UQCC1   | 20q11.22      | -0.36924 | 8.77E-14 | 2.08E-12 |
| CPEB4   | 5q35.2        | 0.36919  | 8.84E-14 | 2.10E-12 |
| NTMT1   | 9q34.11       | -0.369   | 9.11E-14 | 2.16E-12 |
| HTRA2   | 2p13.1        | -0.369   | 9.12E-14 | 2.16E-12 |
| RASSF3  | 12q14.2       | 0.368978 | 9.15E-14 | 2.16E-12 |
| PREB    | 2p23.3        | -0.36889 | 9.29E-14 | 2.19E-12 |
| RANBP2  | 2q13          | 0.368811 | 9.41E-14 | 2.22E-12 |
| AKAP5   | 14q23.3       | 0.368768 | 9.48E-14 | 2.23E-12 |
| RSPH3   | 6q25.3        | 0.368766 | 9.48E-14 | 2.23E-12 |
| GOLPH3L | 1q21.3        | 0.368694 | 9.59E-14 | 2.25E-12 |
| DCUN1D2 | 13q34         | -0.36869 | 9.60E-14 | 2.25E-12 |
| TMA7    | 3p21.31       | -0.36864 | 9.68E-14 | 2.27E-12 |
| LSM2    | 6p21.33       | -0.3686  | 9.75E-14 | 2.28E-12 |
| MANBAL  | 20q11.23      | -0.36843 | 1.00E-13 | 2.34E-12 |
| PSMA1   | 11p15.2       | -0.3683  | 1.02E-13 | 2.39E-12 |
| PTGER2  | 14q22.1       | 0.368296 | 1.02E-13 | 2.39E-12 |
| AP5Z1   | 7p22.1        | -0.36827 | 1.03E-13 | 2.40E-12 |
| NDUFAF3 | 3p21.31       | -0.36821 | 1.04E-13 | 2.42E-12 |
| PCSK6   | 15q26.3       | 0.367865 | 1.10E-13 | 2.55E-12 |
| ACTR3B  | 7q36.1-q36.2  | -0.36786 | 1.10E-13 | 2.55E-12 |
| RPL24   | 3q12.3        | -0.36783 | 1.11E-13 | 2.57E-12 |
| NPRL2   | 3p21.31       | -0.3678  | 1.11E-13 | 2.57E-12 |
| MRPL20  | 1p36.33       | -0.36772 | 1.13E-13 | 2.61E-12 |
| GRINA   | 8q24.3        | -0.36768 | 1.13E-13 | 2.62E-12 |
| MVB12A  | 19p13.11      | -0.36736 | 1.19E-13 | 2.76E-12 |

|          |                 |          |          |          |
|----------|-----------------|----------|----------|----------|
| COPA     | 1q23.2          | 0.367265 | 1.21E-13 | 2.80E-12 |
| MAD2L2   | 1p36.22         | -0.36711 | 1.25E-13 | 2.87E-12 |
| MEX3C    | 18q21.2         | 0.366943 | 1.28E-13 | 2.94E-12 |
| ZNF407   | 18q22.3         | 0.366893 | 1.29E-13 | 2.97E-12 |
| URM1     | 9q34.11         | -0.36677 | 1.31E-13 | 3.02E-12 |
| PTPRB    | 12q15           | 0.366756 | 1.32E-13 | 3.02E-12 |
| EBP      | Xp11.23         | -0.36669 | 1.33E-13 | 3.05E-12 |
| GNA13    | 17q24.1         | 0.366688 | 1.33E-13 | 3.05E-12 |
| LRP10    | 14q11.2         | 0.366675 | 1.34E-13 | 3.05E-12 |
| NAXE     | 1q22            | -0.36652 | 1.37E-13 | 3.13E-12 |
| PCBD1    | 10q22.1         | -0.36649 | 1.38E-13 | 3.14E-12 |
| NCBP2AS2 | 3q29            | -0.36649 | 1.38E-13 | 3.14E-12 |
| USP3     | 15q22.31        | 0.366384 | 1.40E-13 | 3.19E-12 |
| TNIK     | 3q26.2-q26.31   | 0.366315 | 1.42E-13 | 3.22E-12 |
| SWSAP1   | 19p13.2         | -0.36627 | 1.43E-13 | 3.24E-12 |
| TRPT1    | 11q13.1         | -0.36602 | 1.49E-13 | 3.37E-12 |
| LCN12    | 9q34.3          | -0.36602 | 1.49E-13 | 3.37E-12 |
| LIN7B    | 19q13.33        | -0.36599 | 1.49E-13 | 3.38E-12 |
| TMEM131  | 2q11.2          | 0.365781 | 1.55E-13 | 3.50E-12 |
| TMEM201  | 1p36.22         | -0.36571 | 1.56E-13 | 3.53E-12 |
| MECR     | 1p35.3          | -0.36561 | 1.59E-13 | 3.59E-12 |
| FNDC3B   | 3q26.31         | 0.365549 | 1.61E-13 | 3.62E-12 |
| PIK3CB   | 3q22.3          | 0.365541 | 1.61E-13 | 3.62E-12 |
| COX6B1   | 19q13.12        | -0.36544 | 1.64E-13 | 3.68E-12 |
| DDX39A   | 19p13.12        | -0.36541 | 1.64E-13 | 3.69E-12 |
| CLPX     | 15q22.31        | 0.365362 | 1.66E-13 | 3.71E-12 |
| SIPA1L1  | 14q24.2         | 0.364883 | 1.79E-13 | 4.01E-12 |
| ARMC8    | 3q22.3          | 0.364812 | 1.81E-13 | 4.05E-12 |
| SLC30A4  | 15q21.1 15q21.1 | 0.364751 | 1.83E-13 | 4.09E-12 |
| EHF      | 11p13           | 0.364649 | 1.86E-13 | 4.15E-12 |
| RCC1L    | 7q11.23         | -0.36457 | 1.88E-13 | 4.20E-12 |
| MBNL1    | 3q25.1-q25.2    | 0.364542 | 1.89E-13 | 4.21E-12 |
| SLC25A33 | 1p36.22         | -0.36449 | 1.91E-13 | 4.25E-12 |
| COX6C    | 8q22.2          | -0.36442 | 1.93E-13 | 4.29E-12 |
| QPCTL    | 19q13.32        | -0.36412 | 2.03E-13 | 4.50E-12 |
| MRPS23   | 17q22           | -0.36386 | 2.11E-13 | 4.69E-12 |
| FAM50A   | Xq28            | -0.36385 | 2.12E-13 | 4.69E-12 |
| MRPL4    | 19p13.2         | -0.36375 | 2.15E-13 | 4.76E-12 |
| NDUFA8   | 9q33.2          | -0.36363 | 2.19E-13 | 4.85E-12 |
| RCE1     | 11q13.2         | -0.36352 | 2.23E-13 | 4.93E-12 |
| TRMT61A  | 14q32.33        | -0.36346 | 2.25E-13 | 4.97E-12 |
| C16ORF91 | 16p13.3         | -0.36336 | 2.29E-13 | 5.05E-12 |
| SPOPL    | 2q22.1          | 0.363309 | 2.31E-13 | 5.08E-12 |
| PFDN2    | 1q23.3          | -0.36318 | 2.36E-13 | 5.19E-12 |
| PPIP5K1  | 15q15.3         | 0.363074 | 2.40E-13 | 5.27E-12 |
| ZFAND2B  | 2q35            | -0.36305 | 2.41E-13 | 5.29E-12 |
| EXOSC1   | 10q24.1         | -0.363   | 2.43E-13 | 5.32E-12 |
| ZNF24    | 18q12.2         | 0.362931 | 2.46E-13 | 5.37E-12 |
| ALDH6A1  | 14q24.3         | 0.362924 | 2.46E-13 | 5.38E-12 |
| HSF1     | 8q24.3          | -0.36281 | 2.50E-13 | 5.47E-12 |
| TIMM13   | 19p13.3         | -0.36275 | 2.53E-13 | 5.51E-12 |
| ERCC6    | 10q11.23        | 0.362706 | 2.55E-13 | 5.55E-12 |
| ANKRD13D | 11q13.2         | -0.36243 | 2.66E-13 | 5.80E-12 |
| TP53BP1  | 15q15.3         | 0.36239  | 2.68E-13 | 5.83E-12 |
| CAB39    | 2q37.1          | 0.362371 | 2.69E-13 | 5.84E-12 |
| SMIM29   | 6p21.31         | -0.36234 | 2.70E-13 | 5.86E-12 |
| GPX4     | 19p13.3         | -0.36232 | 2.71E-13 | 5.87E-12 |
| KIF1BP   | 10q22.1         | 0.362258 | 2.74E-13 | 5.93E-12 |

|          |                       |          |          |          |
|----------|-----------------------|----------|----------|----------|
| ABHD17C  | 15q25.1               | 0.362244 | 2.74E-13 | 5.93E-12 |
| TRAK2    | 2q33.1                | 0.362212 | 2.76E-13 | 5.96E-12 |
| PTGER4   | 5p13.1                | 0.362162 | 2.78E-13 | 6.00E-12 |
| NAA80    | 3p21.31               | -0.36201 | 2.85E-13 | 6.15E-12 |
| UXT      | Xp11.23               | -0.36176 | 2.97E-13 | 6.39E-12 |
| RPP25L   | 9p13.3                | -0.36173 | 2.98E-13 | 6.41E-12 |
| CMC2     | 16q23.2               | -0.36171 | 2.99E-13 | 6.42E-12 |
| CCT7     | 2p13.2                | -0.36155 | 3.07E-13 | 6.58E-12 |
| KIAA0586 | 14q23.1               | 0.361481 | 3.10E-13 | 6.65E-12 |
| RAB3GAP2 | 1q41                  | 0.361358 | 3.16E-13 | 6.78E-12 |
| ITGAV    | 2q32.1                | 0.361308 | 3.19E-13 | 6.82E-12 |
| ATP5ME   | 4p16.3                | -0.36114 | 3.28E-13 | 7.00E-12 |
| NFS1     | 20q11.22              | -0.361   | 3.35E-13 | 7.15E-12 |
| TMEM52   | 1p36.33               | -0.36098 | 3.36E-13 | 7.17E-12 |
| RIF1     | 2q23.3                | 0.36089  | 3.41E-13 | 7.27E-12 |
| LXN      | 3q25.32               | 0.360814 | 3.45E-13 | 7.35E-12 |
| CDK4     | 12q14.1               | -0.36072 | 3.51E-13 | 7.45E-12 |
| WDFY3    | 4q21.23               | 0.360711 | 3.51E-13 | 7.45E-12 |
| MRPL38   | 17q25.1               | -0.36046 | 3.65E-13 | 7.75E-12 |
| SNHG10   | 14q32.13              | -0.36023 | 3.79E-13 | 8.03E-12 |
| RBBP5    | 1q32.1                | 0.360156 | 3.84E-13 | 8.12E-12 |
| NUDC     | 1p36.11               | -0.3601  | 3.87E-13 | 8.18E-12 |
| ERAL1    | 17q11.2               | -0.36009 | 3.88E-13 | 8.19E-12 |
| NOTCH2   | 1p12                  | 0.360015 | 3.92E-13 | 8.27E-12 |
| MAF1     | 8q24.3                | -0.36002 | 3.92E-13 | 8.27E-12 |
| PSMC3    | 11p11.2               | -0.35999 | 3.94E-13 | 8.30E-12 |
| PRELID1  | 5q35.3                | -0.35995 | 3.97E-13 | 8.34E-12 |
| ARL6IP4  | 12q24.31              | -0.35971 | 4.12E-13 | 8.66E-12 |
| KATNB1   | 16q21                 | -0.35959 | 4.20E-13 | 8.82E-12 |
| COX8A    | 11q13.1               | -0.35957 | 4.21E-13 | 8.84E-12 |
| ITSN2    | 2p23.3                | 0.359509 | 4.25E-13 | 8.91E-12 |
| SEC23A   | 14q21.1               | 0.359452 | 4.29E-13 | 8.98E-12 |
| TBL3     | 16p13.3               | -0.35942 | 4.31E-13 | 9.02E-12 |
| PLEKHJ1  | 19p13.3               | -0.35941 | 4.32E-13 | 9.03E-12 |
| RNF152   | 18q21.33              | 0.35936  | 4.36E-13 | 9.09E-12 |
| SNRPG    | 2p13.3                | -0.35933 | 4.37E-13 | 9.12E-12 |
| HIF1A    | 14q23.2               | 0.359298 | 4.40E-13 | 9.16E-12 |
| PRPF19   | 11q12.2               | -0.35922 | 4.46E-13 | 9.27E-12 |
|          | 8-Mar 10q11.21-q11.22 | 0.358877 | 4.70E-13 | 9.77E-12 |
| CHEK2    | 22q12.1               | -0.35883 | 4.74E-13 | 9.84E-12 |
| TP53BP2  | 1q41                  | 0.35877  | 4.79E-13 | 9.92E-12 |
| LIPH     | 3q27.2                | 0.358765 | 4.79E-13 | 9.92E-12 |
| BLOC1S6  | 15q21.1               | 0.358753 | 4.80E-13 | 9.93E-12 |
| MRTFB    | 16p13.12              | 0.35871  | 4.83E-13 | 9.98E-12 |
| ARL2     | 11q13.1               | -0.35871 | 4.83E-13 | 9.98E-12 |
| ANKRD44  | 2q33.1                | 0.358635 | 4.89E-13 | 1.01E-11 |
| ZSCAN29  | 15q15.3               | 0.358494 | 5.00E-13 | 1.03E-11 |
| NLE1     | 17q12                 | -0.35845 | 5.03E-13 | 1.04E-11 |
| PEX10    | 1p36.32               | -0.3584  | 5.08E-13 | 1.04E-11 |
| ALKBH6   | 19q13.12              | -0.35836 | 5.11E-13 | 1.05E-11 |
| ADCK5    | 8q24.3                | -0.35833 | 5.13E-13 | 1.05E-11 |
| TBC1D2B  | 15q24.3-q25.1         | 0.358301 | 5.16E-13 | 1.06E-11 |
| SYS1     | 20q13.12              | -0.3582  | 5.24E-13 | 1.07E-11 |
| DDT      | 22q11.23              | -0.35819 | 5.25E-13 | 1.07E-11 |
| SLC25A19 | 17q25.1               | -0.35816 | 5.27E-13 | 1.08E-11 |
| CTU1     | 19q13.41              | -0.35806 | 5.36E-13 | 1.09E-11 |
| ATG2B    | 14q32.2               | 0.358039 | 5.38E-13 | 1.10E-11 |
| NDUFA7   | 19p13.2               | -0.35799 | 5.42E-13 | 1.10E-11 |

|           |          |          |          |          |
|-----------|----------|----------|----------|----------|
| CA12      | 15q22.2  | 0.357923 | 5.47E-13 | 1.11E-11 |
| QTRT1     | 19p13.2  | -0.3578  | 5.59E-13 | 1.14E-11 |
| RPL19     | 17q12    | -0.35779 | 5.59E-13 | 1.14E-11 |
| MTG1      | 10q26.3  | -0.35775 | 5.62E-13 | 1.14E-11 |
| POLR2L    | 11p15.5  | -0.35771 | 5.66E-13 | 1.15E-11 |
| FAM126B   | 2q33.1   | 0.357668 | 5.70E-13 | 1.15E-11 |
| CHTF18    | 16p13.3  | -0.35766 | 5.71E-13 | 1.15E-11 |
| TIGD5     | 8q24.3   | -0.35745 | 5.90E-13 | 1.19E-11 |
| EIF2B4    | 2p23.3   | -0.35736 | 5.98E-13 | 1.21E-11 |
| PIDD1     | 11p15.5  | -0.35731 | 6.03E-13 | 1.22E-11 |
| PLEKHM3   | 2q33.3   | 0.35728  | 6.06E-13 | 1.22E-11 |
| PPP4C     | 16p11.2  | -0.35726 | 6.08E-13 | 1.22E-11 |
| ATP5IF1   | 1p35.3   | -0.3572  | 6.14E-13 | 1.24E-11 |
| BZW2      | 7p21.1   | -0.3569  | 6.44E-13 | 1.29E-11 |
| ESRRA     | 11q13.1  | -0.35673 | 6.62E-13 | 1.33E-11 |
| DYNC1LI2  | 16q22.1  | 0.356661 | 6.69E-13 | 1.34E-11 |
| TANC1     | 2q24.2   | 0.356585 | 6.77E-13 | 1.35E-11 |
| HSPB11    | 1p32.3   | -0.35658 | 6.77E-13 | 1.35E-11 |
| PLD1      | 3q26.31  | 0.356577 | 6.78E-13 | 1.35E-11 |
| LRRC57    | 15q15.2  | 0.356522 | 6.83E-13 | 1.36E-11 |
| SYNRG     | 17q12    | 0.356152 | 7.25E-13 | 1.45E-11 |
| PUSL1     | 1p36.33  | -0.35614 | 7.26E-13 | 1.45E-11 |
| PIGL      | 17p11.2  | -0.35596 | 7.46E-13 | 1.49E-11 |
| SLC37A4   | 11q23.3  | -0.35592 | 7.51E-13 | 1.49E-11 |
| RPS9      | 19q13.42 | -0.35581 | 7.65E-13 | 1.52E-11 |
| TNFRSF11A | 18q21.33 | 0.355777 | 7.69E-13 | 1.53E-11 |
| EIF3A     | 10q26.11 | 0.355713 | 7.76E-13 | 1.54E-11 |
| DGCR6L    | 22q11.21 | -0.35565 | 7.84E-13 | 1.55E-11 |
| SEC61B    | 9q22.33  | -0.35563 | 7.86E-13 | 1.56E-11 |
| PIK3R4    | 3q22.1   | 0.355599 | 7.90E-13 | 1.56E-11 |
| GBF1      | 10q24.32 | 0.355593 | 7.91E-13 | 1.56E-11 |
| WDR46     | 6p21.32  | -0.35552 | 8.00E-13 | 1.58E-11 |
| BCOR      | Xp11.4   | 0.355483 | 8.05E-13 | 1.59E-11 |
| UBE2M     | 19q13.43 | -0.3553  | 8.28E-13 | 1.63E-11 |
| CCDC12    | 3p21.31  | -0.35517 | 8.46E-13 | 1.66E-11 |
| CTNND1    | 11q12.1  | 0.354942 | 8.76E-13 | 1.72E-11 |
| CDC42BPB  | 14q32.32 | 0.354926 | 8.79E-13 | 1.73E-11 |
| LEO1      | 15q21.2  | 0.354864 | 8.87E-13 | 1.74E-11 |
| MPV17L2   | 19p13.11 | -0.3547  | 9.11E-13 | 1.79E-11 |
| RPL36     | 19p13.3  | -0.35458 | 9.27E-13 | 1.82E-11 |
| SPTAN1    | 9q34.11  | 0.354569 | 9.29E-13 | 1.82E-11 |
| NIPAL1    | 4p12     | 0.354507 | 9.38E-13 | 1.83E-11 |
| BCLAF1    | 6q23.3   | 0.35423  | 9.80E-13 | 1.91E-11 |
| NOS1AP    | 1q23.3   | 0.354175 | 9.88E-13 | 1.93E-11 |
| RRP8      | 11p15.4  | -0.35399 | 1.02E-12 | 1.98E-11 |
| TEX30     | 13q33.1  | -0.35399 | 1.02E-12 | 1.98E-11 |
| WDR83OS   | 19p13.13 | -0.35396 | 1.02E-12 | 1.99E-11 |
| ARFGAP1   | 20q13.33 | -0.35389 | 1.03E-12 | 2.01E-11 |
| KIAA0040  | 1q25.1   | 0.353887 | 1.03E-12 | 2.01E-11 |
| POLR1C    | 6p21.1   | -0.35387 | 1.04E-12 | 2.01E-11 |
| AFAP1     | 4p16.1   | 0.353813 | 1.05E-12 | 2.03E-11 |
| CREB1     | 2q33.3   | 0.353675 | 1.07E-12 | 2.07E-11 |
| PDCD5     | 19q13.11 | -0.35364 | 1.07E-12 | 2.08E-11 |
| LACTB     | 15q22.2  | 0.353577 | 1.09E-12 | 2.10E-11 |
| TMEM205   | 19p13.2  | -0.35357 | 1.09E-12 | 2.10E-11 |
| SCRN2     | 17q21.32 | -0.35353 | 1.09E-12 | 2.11E-11 |
| EIF3B     | 7p22.3   | -0.35344 | 1.11E-12 | 2.13E-11 |
| PIN1      | 19p13.2  | -0.35344 | 1.11E-12 | 2.13E-11 |

|          |                 |          |          |          |
|----------|-----------------|----------|----------|----------|
| UBXN7    | 3q29            | 0.353283 | 1.14E-12 | 2.18E-11 |
| COMTD1   | 10q22.2         | -0.35323 | 1.15E-12 | 2.20E-11 |
| GTF3A    | 13q12.2         | -0.35319 | 1.15E-12 | 2.21E-11 |
| SSBP1    | 7q34            | -0.35301 | 1.19E-12 | 2.27E-11 |
| LIMS1    | 2q12.3          | 0.353    | 1.19E-12 | 2.27E-11 |
| UBE2V1   | 20q13.13        | -0.35295 | 1.20E-12 | 2.29E-11 |
| SGPL1    | 10q22.1         | 0.352939 | 1.20E-12 | 2.29E-11 |
| FMC1     | 7q34            | -0.35293 | 1.20E-12 | 2.29E-11 |
| ELOC     | 8q21.11         | -0.35289 | 1.21E-12 | 2.31E-11 |
| ATP6V0B  | 1p34.1          | -0.35279 | 1.23E-12 | 2.34E-11 |
| SAPCD1   | 6p21.33         | -0.35269 | 1.25E-12 | 2.37E-11 |
| TMEM216  | 11q12.2         | -0.35267 | 1.25E-12 | 2.38E-11 |
| IGF1R    | 15q26.3         | 0.352646 | 1.26E-12 | 2.38E-11 |
| WASH8P   | 12p13.33        | -0.35264 | 1.26E-12 | 2.39E-11 |
| TRUB2    | 9q34.11         | -0.35259 | 1.27E-12 | 2.40E-11 |
| PDAP1    | 7q22.1          | -0.35255 | 1.27E-12 | 2.41E-11 |
| DPP7     | 9q34.3          | -0.35243 | 1.30E-12 | 2.46E-11 |
| UBR3     | 2q31.1          | 0.352179 | 1.35E-12 | 2.55E-11 |
| SIVA1    | 14q32.33        | -0.35198 | 1.39E-12 | 2.63E-11 |
| KIAA0513 | 16q24.1         | 0.351874 | 1.42E-12 | 2.67E-11 |
| TMEM177  | 2q14.2          | -0.35187 | 1.42E-12 | 2.67E-11 |
| KAT2A    | 17q21.2         | -0.35184 | 1.42E-12 | 2.68E-11 |
| EXOC6B   | 2p13.2          | 0.351527 | 1.49E-12 | 2.81E-11 |
| SGPP2    | 2q36.1          | 0.351512 | 1.50E-12 | 2.82E-11 |
| POLR2M   | 15q21.3         | 0.351483 | 1.50E-12 | 2.83E-11 |
| RP9P     | 7p14.3          | -0.35135 | 1.53E-12 | 2.88E-11 |
| SNORA50C | 17q23.3         | -0.35126 | 1.56E-12 | 2.92E-11 |
| KMT5C    | 19q13.42        | -0.35124 | 1.56E-12 | 2.92E-11 |
| BYSL     | 6p21.1          | -0.3512  | 1.57E-12 | 2.94E-11 |
| EPB41L2  | 6q23.1-q23.2    | 0.351056 | 1.61E-12 | 3.00E-11 |
| TAB2     | 6q25.1          | 0.351023 | 1.62E-12 | 3.02E-11 |
| GLA      | Xq22.1          | -0.35083 | 1.66E-12 | 3.10E-11 |
| SMIM11A  | 21q22.11-q22.12 | -0.35083 | 1.66E-12 | 3.10E-11 |
| SYT15    | 10q11.22        | 0.35079  | 1.67E-12 | 3.12E-11 |
| TEP1     | 14q11.2         | 0.350777 | 1.68E-12 | 3.12E-11 |
| EGFR     | 7p11.2          | 0.350772 | 1.68E-12 | 3.12E-11 |
| ATP5MC1  | 17q21.32        | -0.35071 | 1.70E-12 | 3.15E-11 |
| THOP1    | 19p13.3         | -0.35068 | 1.70E-12 | 3.16E-11 |
| BOD1L1   | 4p15.33         | 0.35055  | 1.74E-12 | 3.22E-11 |
| UFSP1    | 7q22.1          | -0.35048 | 1.76E-12 | 3.25E-11 |
| MFSD14C  | 9q22.33         | -0.35047 | 1.76E-12 | 3.26E-11 |
| PSMB2    | 1p34.3          | -0.35045 | 1.77E-12 | 3.26E-11 |
| ARID1B   | 6q25.3          | 0.350129 | 1.85E-12 | 3.43E-11 |
| TIMM8A   | Xq22.1          | -0.35012 | 1.86E-12 | 3.43E-11 |
| RCOR1    | 14q32.31-q32.32 | 0.349982 | 1.90E-12 | 3.50E-11 |
| EIF3I    | 1p35.2          | -0.3499  | 1.92E-12 | 3.54E-11 |
| IDH3G    | Xq28            | -0.34988 | 1.93E-12 | 3.55E-11 |
| OSER1    | 20q13.12        | -0.3498  | 1.95E-12 | 3.59E-11 |
| GOLGB1   | 3q13.33         | 0.349797 | 1.95E-12 | 3.59E-11 |
| HDAC10   | 22q13.33        | -0.34976 | 1.96E-12 | 3.61E-11 |
| MYO1C    | 17p13.3         | 0.349729 | 1.97E-12 | 3.62E-11 |
| NFKB1    | 4q24            | 0.34943  | 2.07E-12 | 3.78E-11 |
| PPP1CA   | 11q13.2         | -0.34934 | 2.09E-12 | 3.83E-11 |
| EIF2AK3  | 2p11.2          | 0.34927  | 2.12E-12 | 3.87E-11 |
| FIS1     | 7q22.1          | -0.34918 | 2.15E-12 | 3.92E-11 |
| KMT2C    | 7q36.1          | 0.349126 | 2.16E-12 | 3.95E-11 |
| SLC25A14 | Xq26.1          | -0.34912 | 2.16E-12 | 3.95E-11 |
| LIMA1    | 12q13.12        | 0.349113 | 2.17E-12 | 3.95E-11 |

|          |          |          |          |          |
|----------|----------|----------|----------|----------|
| RPL28    | 19q13.42 | -0.34902 | 2.20E-12 | 4.01E-11 |
| NT5C3B   | 17q21.2  | -0.34879 | 2.28E-12 | 4.15E-11 |
| SERTAD4  | 1q32.2   | 0.348703 | 2.31E-12 | 4.20E-11 |
| ZSWIM1   | 20q13.12 | -0.34869 | 2.31E-12 | 4.20E-11 |
| TRMT2A   | 22q11.21 | -0.34867 | 2.32E-12 | 4.21E-11 |
| SNHG3    | 1p35.3   | -0.34863 | 2.34E-12 | 4.23E-11 |
| NPEPL1   | 20q13.32 | -0.34852 | 2.38E-12 | 4.30E-11 |
| SLC2A8   | 9q33.3   | -0.34842 | 2.41E-12 | 4.37E-11 |
| PVT1     | 8q24.21  | -0.34839 | 2.42E-12 | 4.38E-11 |
| ANKFY1   | 17p13.2  | 0.348358 | 2.44E-12 | 4.40E-11 |
| MAML3    | 4q31.1   | 0.348352 | 2.44E-12 | 4.40E-11 |
| HIVEP2   | 6q24.2   | 0.348287 | 2.46E-12 | 4.44E-11 |
| FAM136A  | 2p13.3   | -0.34824 | 2.48E-12 | 4.47E-11 |
| RPL30    | 8q22.2   | -0.34822 | 2.49E-12 | 4.47E-11 |
| DSG2     | 18q12.1  | 0.348088 | 2.54E-12 | 4.56E-11 |
| TPR      | 1q31.1   | 0.348035 | 2.56E-12 | 4.59E-11 |
| SELENOO  | 22q13.33 | -0.34803 | 2.56E-12 | 4.59E-11 |
| TBCB     | 19q13.12 | -0.34801 | 2.57E-12 | 4.61E-11 |
| CHP1     | 15q15.1  | 0.347979 | 2.58E-12 | 4.62E-11 |
| PPP1R12B | 1q32.1   | 0.347971 | 2.58E-12 | 4.63E-11 |
| PDF      | 16q22.1  | -0.34778 | 2.66E-12 | 4.76E-11 |
| KHK      | 2p23.3   | -0.34762 | 2.73E-12 | 4.87E-11 |
| CIAO1    | 2q11.2   | -0.34762 | 2.73E-12 | 4.87E-11 |
| C20ORF27 | 20p13    | -0.34758 | 2.74E-12 | 4.89E-11 |
| ZNF619   | 3p22.1   | 0.347404 | 2.82E-12 | 5.02E-11 |
| PIN4P1   | 15q15.3  | -0.34735 | 2.84E-12 | 5.06E-11 |
| TLR5     | 1q41     | 0.347336 | 2.85E-12 | 5.07E-11 |
| UACA     | 15q23    | 0.347272 | 2.88E-12 | 5.11E-11 |
| KIAA1109 | 4q27     | 0.347261 | 2.88E-12 | 5.12E-11 |
| CDC42BPA | 1q42.13  | 0.34705  | 2.98E-12 | 5.28E-11 |
| PFDN5    | 12q13.13 | -0.34704 | 2.98E-12 | 5.28E-11 |
| H2AFX    | 11q23.3  | -0.347   | 3.00E-12 | 5.31E-11 |
| IVNS1ABP | 1q25.3   | 0.346966 | 3.01E-12 | 5.33E-11 |
| C19ORF25 | 19p13.3  | -0.34693 | 3.03E-12 | 5.36E-11 |
| ZFPL1    | 11q13.1  | -0.34674 | 3.12E-12 | 5.51E-11 |
| TOP1MT   | 8q24.3   | -0.34672 | 3.13E-12 | 5.52E-11 |
| NOC4L    | 12q24.33 | -0.34663 | 3.17E-12 | 5.59E-11 |
| CNPY3    | 6p21.1   | -0.34663 | 3.17E-12 | 5.59E-11 |
| DOP1B    | 21q22.12 | 0.3466   | 3.19E-12 | 5.61E-11 |
| METTL22  | 16p13.2  | -0.34658 | 3.19E-12 | 5.62E-11 |
| MFHAS1   | 8p23.1   | 0.34649  | 3.24E-12 | 5.69E-11 |
| MINDY1   | 1q21.3   | 0.346455 | 3.26E-12 | 5.72E-11 |
| CHKB-DT  | 22q13.33 | -0.34631 | 3.33E-12 | 5.84E-11 |
| DCUN1D5  | 11q22.3  | -0.34627 | 3.35E-12 | 5.87E-11 |
| RAE1     | 20q13.31 | -0.34625 | 3.36E-12 | 5.88E-11 |
| NDUFB8   | 10q24.31 | -0.34616 | 3.41E-12 | 5.96E-11 |
| DDX28    | 16q22.1  | -0.34611 | 3.43E-12 | 6.00E-11 |
| FAAP100  | 17q25.3  | -0.34611 | 3.44E-12 | 6.00E-11 |
| ANTXR2   | 4q21.21  | 0.346092 | 3.44E-12 | 6.01E-11 |
| SNRK     | 3p22.1   | 0.346034 | 3.47E-12 | 6.05E-11 |
| PPP4R3A  | 14q32.12 | 0.346019 | 3.48E-12 | 6.06E-11 |
| NUP85    | 17q25.1  | -0.34595 | 3.52E-12 | 6.12E-11 |
| UTRN     | 6q24.2   | 0.345856 | 3.57E-12 | 6.20E-11 |
| CLTC     | 17q23.1  | 0.345669 | 3.67E-12 | 6.38E-11 |
| TPRKB    | 2p13.1   | -0.34564 | 3.69E-12 | 6.40E-11 |
| OSBPL8   | 12q21.2  | 0.345577 | 3.72E-12 | 6.46E-11 |
| WDR44    | Xq24     | 0.345467 | 3.79E-12 | 6.56E-11 |
| CWC15    | 11q21    | -0.34543 | 3.81E-12 | 6.59E-11 |

|            |               |          |          |          |
|------------|---------------|----------|----------|----------|
| RP9        | 7p14.3        | -0.34519 | 3.95E-12 | 6.83E-11 |
| HK2        | 2p12          | 0.345072 | 4.02E-12 | 6.95E-11 |
| FAM160A1   | 4q31.3        | 0.344963 | 4.09E-12 | 7.06E-11 |
| GLIS3      | 9p24.2        | 0.344948 | 4.10E-12 | 7.07E-11 |
| PHB        | 17q21.33      | -0.34481 | 4.18E-12 | 7.21E-11 |
| EDEM1      | 3p26.1        | 0.344756 | 4.22E-12 | 7.26E-11 |
| TCF12      | 15q21.3       | 0.344687 | 4.26E-12 | 7.33E-11 |
| SDE2       | 1q42.12       | 0.344653 | 4.28E-12 | 7.36E-11 |
| NRIP1      | 21q11.2-q21.1 | 0.344527 | 4.37E-12 | 7.50E-11 |
| ZNF641     | 12q13.11      | 0.344512 | 4.38E-12 | 7.51E-11 |
| SNX1       | 15q22.31      | 0.344467 | 4.41E-12 | 7.55E-11 |
| GAREM1     | 18q12.1       | 0.344403 | 4.45E-12 | 7.62E-11 |
| TSR3       | 16p13.3       | -0.3443  | 4.52E-12 | 7.74E-11 |
| DNAJB14    | 4q23          | 0.344203 | 4.59E-12 | 7.84E-11 |
| BAD        | 11q13.1       | -0.34418 | 4.60E-12 | 7.87E-11 |
| NIPA2      | 15q11.2       | 0.344147 | 4.62E-12 | 7.90E-11 |
| WDR47      | 1p13.3        | 0.343971 | 4.75E-12 | 8.10E-11 |
| ZFAS1      | 20q13.13      | -0.34397 | 4.75E-12 | 8.10E-11 |
| RGP1       | 9p13.3        | 0.343884 | 4.81E-12 | 8.19E-11 |
| KMT2E-AS1  | 7q22.3        | -0.34385 | 4.84E-12 | 8.23E-11 |
| SLC66A1    | 1p36.13       | -0.34375 | 4.91E-12 | 8.35E-11 |
| ENKD1      | 16q22.1       | -0.34374 | 4.92E-12 | 8.35E-11 |
| SEC24B     | 4q25          | 0.343718 | 4.93E-12 | 8.37E-11 |
| TMEM30B    | 14q23.1       | 0.343686 | 4.96E-12 | 8.41E-11 |
| DIABLO     | 12q24.31      | -0.34349 | 5.10E-12 | 8.65E-11 |
| APAF1      | 12q23.1       | 0.343402 | 5.17E-12 | 8.76E-11 |
| MAP4K5     | 14q22.1       | 0.343288 | 5.26E-12 | 8.90E-11 |
| RBM42      | 19q13.12      | -0.34328 | 5.27E-12 | 8.91E-11 |
| CTCF       | 16q22.1       | 0.343242 | 5.30E-12 | 8.95E-11 |
| SCARNA2    | 1p13.3        | -0.34322 | 5.32E-12 | 8.97E-11 |
| ZNF674-AS1 | Xp11.3        | -0.34315 | 5.37E-12 | 9.06E-11 |
| TNFRSF25   | 1p36.31       | -0.34311 | 5.40E-12 | 9.10E-11 |
| FGD6       | 12q22         | 0.343106 | 5.41E-12 | 9.11E-11 |
| RPL35A     | 3q29          | -0.34309 | 5.42E-12 | 9.12E-11 |
| ZNF236     | 18q23         | 0.343063 | 5.45E-12 | 9.15E-11 |
| POLR3K     | 16p13.3       | -0.34302 | 5.48E-12 | 9.20E-11 |
| DAGLB      | 7p22.1        | -0.34298 | 5.52E-12 | 9.25E-11 |
| GLUL       | 1q25.3        | 0.342934 | 5.55E-12 | 9.31E-11 |
| INTS11     | 1p36.33       | -0.34288 | 5.59E-12 | 9.37E-11 |
| NCKAP1     | 2q32.1        | 0.3428   | 5.67E-12 | 9.48E-11 |
| PAK2       | 3q29          | 0.34271  | 5.74E-12 | 9.60E-11 |
| MCRS1      | 12q13.12      | -0.34261 | 5.83E-12 | 9.73E-11 |
| ARHGEF12   | 11q23.3       | 0.342429 | 5.99E-12 | 1.00E-10 |
| MITD1      | 2q11.2        | -0.34242 | 6.00E-12 | 1.00E-10 |
| PTRH1      | 9q34.11       | -0.34232 | 6.09E-12 | 1.02E-10 |
| TACC1      | 8p11.22       | 0.342307 | 6.10E-12 | 1.02E-10 |
| RPS15      | 19p13.3       | -0.34228 | 6.13E-12 | 1.02E-10 |
| CMSS1      | 3q12.1        | -0.34222 | 6.18E-12 | 1.03E-10 |
| RPA3       | 7p21.3        | -0.34221 | 6.19E-12 | 1.03E-10 |
| BLZF1      | 1q24.2        | 0.342159 | 6.24E-12 | 1.04E-10 |
| CREBBP     | 16p13.3       | 0.342137 | 6.26E-12 | 1.04E-10 |
| C4ORF48    | 4p16.3        | -0.34204 | 6.35E-12 | 1.05E-10 |
| CRYGS      | 3q27.3        | -0.34193 | 6.46E-12 | 1.07E-10 |
| SSH2       | 17q11.2       | 0.34192  | 6.47E-12 | 1.07E-10 |
| ZC3HAV1    | 7q34          | 0.341896 | 6.49E-12 | 1.07E-10 |
| RNF145     | 5q33.3        | 0.341882 | 6.50E-12 | 1.07E-10 |
| SNRNP70    | 19q13.33      | -0.34183 | 6.55E-12 | 1.08E-10 |
| AP1S1      | 7q22.1        | -0.34182 | 6.56E-12 | 1.08E-10 |



|              |               |          |          |          |
|--------------|---------------|----------|----------|----------|
| SMAD1        | 4q31.21       | 0.341733 | 6.65E-12 | 1.10E-10 |
| BCAP31       | Xq28          | -0.3417  | 6.69E-12 | 1.10E-10 |
| ARRDC1       | 9q34.3        | -0.34165 | 6.74E-12 | 1.11E-10 |
| APC          | 5q22.2        | 0.341627 | 6.76E-12 | 1.11E-10 |
| ATRAID       | 2p23.3        | -0.34149 | 6.89E-12 | 1.13E-10 |
| TNRC6B       | 22q13.1       | 0.341254 | 7.14E-12 | 1.17E-10 |
| ATAD3A       | 1p36.33       | -0.34112 | 7.29E-12 | 1.19E-10 |
| ZGPAT        | 20q13.33      | -0.34109 | 7.32E-12 | 1.20E-10 |
| ZNF644       | 1p22.2        | 0.340973 | 7.45E-12 | 1.22E-10 |
| RC3H2        | 9q33.2        | 0.340914 | 7.52E-12 | 1.23E-10 |
| ICK          | 6p12.1        | 0.340796 | 7.65E-12 | 1.25E-10 |
| LSM5         | 7p14.3        | -0.34071 | 7.75E-12 | 1.27E-10 |
| CPNE1        | 20q11.22      | -0.3407  | 7.77E-12 | 1.27E-10 |
| HELZ         | 17q24.2       | 0.340678 | 7.79E-12 | 1.27E-10 |
| ARFIP2       | 11p15.4       | -0.34064 | 7.83E-12 | 1.28E-10 |
| NELFCD       | 20q13.32      | -0.34063 | 7.85E-12 | 1.28E-10 |
| MPG          | 16p13.3       | -0.34049 | 8.01E-12 | 1.30E-10 |
| UQCRCQ       | 5q31.1        | -0.34044 | 8.07E-12 | 1.31E-10 |
| CCNL2        | 1p36.33       | -0.34041 | 8.10E-12 | 1.31E-10 |
| IMMP2L       | 7q31.1        | -0.3404  | 8.12E-12 | 1.32E-10 |
| SF3B6        | 2p23.3        | -0.34025 | 8.30E-12 | 1.34E-10 |
| RAB11A       | 15q22.31      | 0.340182 | 8.38E-12 | 1.36E-10 |
| TCAF1        | 7q35          | 0.340085 | 8.51E-12 | 1.38E-10 |
| PLEKHG1      | 6q25.1        | 0.34005  | 8.55E-12 | 1.38E-10 |
| PPP1R15B     | 1q32.1        | 0.339849 | 8.81E-12 | 1.42E-10 |
| PTRH2        | 17q23.1       | -0.33979 | 8.89E-12 | 1.43E-10 |
| ZNF692       | 1q44          | -0.33975 | 8.94E-12 | 1.44E-10 |
| FAM86C1      | 11q13.4       | -0.33969 | 9.03E-12 | 1.45E-10 |
| FAM168A      | 11q13.4       | 0.339552 | 9.21E-12 | 1.48E-10 |
| EOGT         | 3p14.1        | 0.339466 | 9.33E-12 | 1.50E-10 |
| SASH1        | 6q24.3-q25.1  | 0.339196 | 9.71E-12 | 1.56E-10 |
| MRPS5        | 2q11.1        | -0.33916 | 9.76E-12 | 1.57E-10 |
| PPM1A        | 14q23.1       | 0.339108 | 9.84E-12 | 1.58E-10 |
| PAWR         | 12q21.2       | 0.339107 | 9.84E-12 | 1.58E-10 |
| UNC119       | 17q11.2       | -0.33909 | 9.86E-12 | 1.58E-10 |
| MAPKAPK5-AS1 | 12q24.12      | -0.33904 | 9.94E-12 | 1.59E-10 |
| GPX1         | 3p21.31       | -0.33895 | 1.01E-11 | 1.61E-10 |
| RPL29        | 3p21.2        | -0.33893 | 1.01E-11 | 1.61E-10 |
| PIK3CG       | 7q22.3        | 0.33892  | 1.01E-11 | 1.62E-10 |
| MCUR1        | 6p23          | -0.3388  | 1.03E-11 | 1.64E-10 |
| AGTRAP       | 1p36.22       | -0.33873 | 1.04E-11 | 1.66E-10 |
| PSD3         | 8p22          | 0.338694 | 1.05E-11 | 1.67E-10 |
| DFFB         | 1p36.32       | -0.33861 | 1.06E-11 | 1.69E-10 |
| TCFL5        | 20q13.33      | -0.33859 | 1.06E-11 | 1.69E-10 |
| BABAM1       | 19p13.11      | -0.33858 | 1.06E-11 | 1.69E-10 |
| ALKBH7       | 19p13.3       | -0.33851 | 1.07E-11 | 1.71E-10 |
| GALNT10      | 5q33.2        | 0.338359 | 1.10E-11 | 1.74E-10 |
| RPIA         | 2p11.2        | -0.33835 | 1.10E-11 | 1.74E-10 |
| RPUSD4       | 11q24.2       | -0.33826 | 1.12E-11 | 1.77E-10 |
| RAPH1        | 2q33.2        | 0.338233 | 1.12E-11 | 1.77E-10 |
| EEF1G        | 11q12.3       | -0.33822 | 1.12E-11 | 1.77E-10 |
| CYC1         | 8q24.3        | -0.33805 | 1.15E-11 | 1.82E-10 |
| BAZ1A        | 14q13.1-q13.2 | 0.338041 | 1.15E-11 | 1.82E-10 |
| FASTK        | 7q36.1        | -0.33796 | 1.17E-11 | 1.84E-10 |
| TNFSF15      | 9q32          | 0.337873 | 1.18E-11 | 1.86E-10 |
| UNC5C        | 4q22.3        | 0.337842 | 1.19E-11 | 1.87E-10 |
| PRPF8        | 17p13.3       | 0.337823 | 1.19E-11 | 1.87E-10 |
| MACF1        | 1p34.3        | 0.337816 | 1.19E-11 | 1.87E-10 |

|          |          |          |          |          |
|----------|----------|----------|----------|----------|
| WASH7P   | 1p36.33  | -0.33781 | 1.19E-11 | 1.87E-10 |
| RNASEH2B | 13q14.3  | -0.33775 | 1.20E-11 | 1.89E-10 |
| SLC52A2  | 8q24.3   | -0.33769 | 1.21E-11 | 1.91E-10 |
| TM9SF3   | 10q24.1  | 0.337319 | 1.28E-11 | 2.01E-10 |
| SIPA1L2  | 1q42.2   | 0.337218 | 1.30E-11 | 2.04E-10 |
| SVIL     | 10p11.23 | 0.337207 | 1.30E-11 | 2.04E-10 |
| TSPYL1   | 6q22.1   | 0.337142 | 1.32E-11 | 2.06E-10 |
| NME2P1   | 12q24.23 | -0.33706 | 1.33E-11 | 2.08E-10 |
| LAMC1    | 1q25.3   | 0.337018 | 1.34E-11 | 2.09E-10 |
| C1ORF122 | 1p34.3   | -0.33696 | 1.35E-11 | 2.11E-10 |
| EIF3F    | 11p15.4  | -0.33692 | 1.36E-11 | 2.12E-10 |
| DUSP15   | 20q11.21 | -0.33689 | 1.37E-11 | 2.13E-10 |
| ITFG1    | 16q12.1  | 0.33688  | 1.37E-11 | 2.13E-10 |
| NT5C     | 17q25.1  | -0.33664 | 1.42E-11 | 2.21E-10 |
| DUS3L    | 19p13.3  | -0.33661 | 1.42E-11 | 2.21E-10 |
| GNA14    | 9q21.2   | 0.336599 | 1.43E-11 | 2.21E-10 |
| TOMM5    | 9p13.2   | -0.33656 | 1.43E-11 | 2.22E-10 |
| FOXP1    | 3p13     | 0.336426 | 1.46E-11 | 2.27E-10 |
| VANGL1   | 1p13.1   | 0.336334 | 1.48E-11 | 2.30E-10 |
| ZSWIM6   | 5q12.1   | 0.336278 | 1.49E-11 | 2.31E-10 |
| KCND3    | 1p13.2   | 0.336273 | 1.50E-11 | 2.31E-10 |
| MED23    | 6q23.2   | 0.336194 | 1.51E-11 | 2.34E-10 |
| DNAJC8   | 1p35.3   | -0.33618 | 1.52E-11 | 2.34E-10 |
| TEPSIN   | 17q25.3  | -0.33613 | 1.53E-11 | 2.36E-10 |
| CREBRF   | 5q35.1   | 0.336019 | 1.55E-11 | 2.39E-10 |
| HSPBP1   | 19q13.42 | -0.33594 | 1.57E-11 | 2.42E-10 |
| KXD1     | 19p13.11 | -0.3359  | 1.58E-11 | 2.43E-10 |
| SNHG8    | 4q26     | -0.33577 | 1.61E-11 | 2.48E-10 |
| ENTPD4   | 8p21.3   | 0.335571 | 1.66E-11 | 2.55E-10 |
| EMC8     | 16q24.1  | -0.33543 | 1.69E-11 | 2.60E-10 |
| POLD2    | 7p13     | -0.33535 | 1.71E-11 | 2.63E-10 |
| MCL1     | 1q21.2   | 0.335331 | 1.72E-11 | 2.63E-10 |
| PGM2L1   | 11q13.4  | 0.335324 | 1.72E-11 | 2.63E-10 |
| AKAP9    | 7q21.2   | 0.335301 | 1.72E-11 | 2.64E-10 |
| SLC35A3  | 1p21.2   | 0.335247 | 1.74E-11 | 2.66E-10 |
| DTNBP1   | 6p22.3   | -0.33515 | 1.76E-11 | 2.69E-10 |
| KAT6A    | 8p11.21  | 0.335149 | 1.76E-11 | 2.70E-10 |
| LSM8     | 7q31.31  | -0.33514 | 1.77E-11 | 2.70E-10 |
| AKIP1    | 11p15.4  | -0.33507 | 1.78E-11 | 2.72E-10 |
| NEMF     | 14q21.3  | 0.335052 | 1.79E-11 | 2.73E-10 |
| EIF3G    | 19p13.2  | -0.33505 | 1.79E-11 | 2.73E-10 |
| ANK3     | 10q21.2  | 0.335033 | 1.79E-11 | 2.73E-10 |
| MRPS26   | 20p13    | -0.33501 | 1.80E-11 | 2.74E-10 |
| KLHDC4   | 16q24.2  | -0.33501 | 1.80E-11 | 2.74E-10 |
| LHFPL2   | 5q14.1   | 0.334873 | 1.84E-11 | 2.79E-10 |
| CTRL     | 16q22.1  | -0.33487 | 1.84E-11 | 2.79E-10 |
| MRPL41   | 9q34.3   | -0.3348  | 1.85E-11 | 2.81E-10 |
| NEO1     | 15q24.1  | 0.334674 | 1.89E-11 | 2.86E-10 |
| MEGF9    | 9q33.2   | 0.33465  | 1.90E-11 | 2.87E-10 |
| ABHD11   | 7q11.23  | -0.33457 | 1.92E-11 | 2.90E-10 |
| TEDC2    | 16p13.3  | -0.33427 | 2.00E-11 | 3.03E-10 |
| PKP2     | 12p11.21 | 0.334099 | 2.06E-11 | 3.11E-10 |
| FUNDC2   | Xq28     | -0.33406 | 2.07E-11 | 3.12E-10 |
| RFC2     | 7q11.23  | -0.33405 | 2.07E-11 | 3.12E-10 |
| MYO5B    | 18q21.1  | 0.334048 | 2.07E-11 | 3.12E-10 |
| REEP6    | 19p13.3  | -0.33405 | 2.07E-11 | 3.12E-10 |
| C19ORF73 | 19q13.33 | -0.33403 | 2.08E-11 | 3.13E-10 |
| CDK17    | 12q23.1  | 0.333861 | 2.13E-11 | 3.20E-10 |

|          |                |          |          |          |
|----------|----------------|----------|----------|----------|
| ARHGAP31 | 3q13.32-q13.33 | 0.333828 | 2.14E-11 | 3.21E-10 |
| DGAT2    | 11q13.5        | -0.33373 | 2.17E-11 | 3.26E-10 |
| MRPL52   | 14q11.2        | -0.33361 | 2.21E-11 | 3.31E-10 |
| LYSMD3   | 5q14.3         | 0.333589 | 2.21E-11 | 3.32E-10 |
| PPP4R2   | 3p13           | 0.333376 | 2.28E-11 | 3.42E-10 |
| DOCK8    | 9p24.3         | 0.333162 | 2.36E-11 | 3.53E-10 |
| ROR1     | 1p31.3         | 0.333099 | 2.38E-11 | 3.56E-10 |
| DNAJA3   | 16p13.3        | -0.3331  | 2.38E-11 | 3.56E-10 |
| LEPROT   | 1p31.3         | 0.333036 | 2.40E-11 | 3.59E-10 |
| RRP7A    | 22q13.2        | -0.33299 | 2.41E-11 | 3.60E-10 |
| NME3     | 16p13.3        | -0.33299 | 2.42E-11 | 3.61E-10 |
| MFAP1    | 15q15.3        | 0.332959 | 2.43E-11 | 3.62E-10 |
| NOC2L    | 1p36.33        | -0.33284 | 2.47E-11 | 3.68E-10 |
| PDE4DIP  | 1q21.2         | 0.332836 | 2.47E-11 | 3.68E-10 |
| COX7B    | Xq21.1         | -0.33273 | 2.51E-11 | 3.73E-10 |
| PGP      | 16p13.3        | -0.3327  | 2.52E-11 | 3.74E-10 |
| CROCCP2  | 1p36.13        | -0.33249 | 2.60E-11 | 3.86E-10 |
| HK1      | 10q22.1        | 0.332482 | 2.60E-11 | 3.86E-10 |
| SEPTIN11 | 4q21.1         | 0.332437 | 2.62E-11 | 3.88E-10 |
| SSU72    | 1p36.33        | -0.33242 | 2.62E-11 | 3.89E-10 |
| MAP2K5   | 15q23          | 0.332399 | 2.63E-11 | 3.90E-10 |
| MYBL2    | 20q13.12       | -0.33226 | 2.68E-11 | 3.97E-10 |
| RPL39    | Xq24           | -0.33219 | 2.71E-11 | 4.01E-10 |
| ELK3     | 12q23.1        | 0.33216  | 2.72E-11 | 4.03E-10 |
| PISD     | 22q12.2        | -0.33196 | 2.81E-11 | 4.14E-10 |
| CHSY1    | 15q26.3        | 0.331948 | 2.81E-11 | 4.14E-10 |
| PRPF31   | 19q13.42       | -0.33195 | 2.81E-11 | 4.14E-10 |
| DNAJA4   | 15q25.1        | 0.3319   | 2.83E-11 | 4.17E-10 |
| GSK3B    | 3q13.33        | 0.33189  | 2.83E-11 | 4.17E-10 |
| FBXL6    | 8q24.3         | -0.33188 | 2.84E-11 | 4.17E-10 |
| TUFM     | 16p11.2        | -0.33185 | 2.85E-11 | 4.19E-10 |
| KYAT1    | 9q34.11        | -0.33183 | 2.86E-11 | 4.20E-10 |
| TMEM126A | 11q14.1        | -0.33179 | 2.87E-11 | 4.22E-10 |
| WIPF2    | 17q21.2        | 0.331701 | 2.91E-11 | 4.27E-10 |
| RHEBL1   | 12q13.12       | -0.33165 | 2.93E-11 | 4.30E-10 |
| ANKRD13B | 17q11.2        | -0.33162 | 2.94E-11 | 4.31E-10 |
| ATP5F1D  | 19p13.3        | -0.33158 | 2.96E-11 | 4.34E-10 |
| NIPA1    | 15q11.2        | 0.331561 | 2.97E-11 | 4.35E-10 |
| TBC1D7   | 6p24.1         | -0.33152 | 2.99E-11 | 4.37E-10 |
| CHCHD7   | 8q12.1         | -0.33137 | 3.05E-11 | 4.46E-10 |
| CNST     | 1q44           | 0.331273 | 3.10E-11 | 4.52E-10 |
| GEMIN7   | 19q13.32       | -0.33125 | 3.10E-11 | 4.53E-10 |
| MEN1     | 11q13.1        | -0.33107 | 3.19E-11 | 4.65E-10 |
| MFSD2B   | 2p23.3         | -0.33103 | 3.21E-11 | 4.67E-10 |
| CCDC189  | 16p11.2        | -0.3309  | 3.27E-11 | 4.75E-10 |
| GPR143   | Xp22.2         | -0.33083 | 3.30E-11 | 4.80E-10 |
| ATF4     | 22q13.1        | -0.33075 | 3.34E-11 | 4.86E-10 |
| SNHG20   | 17q25.2        | -0.33069 | 3.37E-11 | 4.89E-10 |
| FAM3A    | Xq28           | -0.33066 | 3.38E-11 | 4.91E-10 |
| DHODH    | 16q22.2        | -0.33046 | 3.48E-11 | 5.05E-10 |
| WAPL     | 10q23.2        | 0.330324 | 3.55E-11 | 5.14E-10 |
| OIP5-AS1 | 15q15.1        | 0.330225 | 3.60E-11 | 5.21E-10 |
| LTO1     | 11q13.3        | -0.33011 | 3.66E-11 | 5.30E-10 |
| ADAR     | 1q21.3         | 0.330092 | 3.67E-11 | 5.31E-10 |
| TELO2    | 16p13.3        | -0.32994 | 3.75E-11 | 5.42E-10 |
| EIF2AK4  | 15q15.1        | 0.329907 | 3.77E-11 | 5.44E-10 |
| DHX34    | 19q13.32       | -0.32985 | 3.80E-11 | 5.48E-10 |
| DGCR6    | 22q11.21 22q11 | -0.32984 | 3.80E-11 | 5.48E-10 |

|          |                   |          |          |          |
|----------|-------------------|----------|----------|----------|
| MICOS10  | 1p36.13           | -0.32984 | 3.80E-11 | 5.48E-10 |
| FBXW11   | 5q35.1            | 0.329669 | 3.90E-11 | 5.61E-10 |
| DOCK5    | 8p21.2            | 0.329638 | 3.92E-11 | 5.64E-10 |
| ACTN1    | 14q24.1 14q22-q24 | 0.32963  | 3.92E-11 | 5.64E-10 |
| CEBPB    | 20q13.13          | -0.32958 | 3.95E-11 | 5.67E-10 |
| BCL2L12  | 19q13.33          | -0.32957 | 3.96E-11 | 5.68E-10 |
| RPP40    | 6p25.1            | -0.32954 | 3.97E-11 | 5.70E-10 |
| RALGAPA2 | 20p11.23          | 0.329479 | 4.01E-11 | 5.75E-10 |
| SF3A1    | 22q12.2           | 0.329442 | 4.03E-11 | 5.77E-10 |
| B9D1     | 17p11.2           | -0.32941 | 4.04E-11 | 5.79E-10 |
| RPL26L1  | 5q35.1            | -0.32936 | 4.08E-11 | 5.83E-10 |
| ZNF280D  | 15q21.3           | 0.329134 | 4.21E-11 | 6.02E-10 |
| SERINC1  | 6q22.31           | 0.329098 | 4.23E-11 | 6.05E-10 |
| FUBP1    | 1p31.1            | 0.329039 | 4.27E-11 | 6.09E-10 |
| ATXN7    | 3p14.1            | 0.32901  | 4.29E-11 | 6.11E-10 |
| YIPF5    | 5q31.3            | 0.328995 | 4.30E-11 | 6.12E-10 |
| TMEM186  | 16p13.2           | -0.32899 | 4.30E-11 | 6.12E-10 |
| SLMAP    | 3p14.3            | 0.328909 | 4.35E-11 | 6.19E-10 |
| ZBTB1    | 14q23.3           | 0.328742 | 4.45E-11 | 6.33E-10 |
| RFC4     | 3q27.3            | -0.32871 | 4.47E-11 | 6.35E-10 |
| MGA      | 15q15.1           | 0.328708 | 4.48E-11 | 6.35E-10 |
| NEK7     | 1q31.3            | 0.328708 | 4.48E-11 | 6.35E-10 |
| TNNC2    | 20q13.12          | -0.32867 | 4.50E-11 | 6.38E-10 |
| TUBE1    | 6q21              | -0.32866 | 4.51E-11 | 6.39E-10 |
| STS      | Xp22.31           | 0.328582 | 4.56E-11 | 6.45E-10 |
| PPP1R16A | 8q24.3            | -0.32855 | 4.58E-11 | 6.48E-10 |
| RAB5IF   | 20q11.23          | -0.32842 | 4.66E-11 | 6.59E-10 |
| HINFP    | 11q23.3           | -0.32834 | 4.72E-11 | 6.66E-10 |
| SSR4     | Xq28              | -0.3283  | 4.74E-11 | 6.70E-10 |
| TRAP1    | 16p13.3           | -0.32828 | 4.76E-11 | 6.71E-10 |
| TPM1     | 15q22.2           | 0.328259 | 4.77E-11 | 6.73E-10 |
| FOXN3    | 14q31.3-q32.11    | 0.328232 | 4.79E-11 | 6.75E-10 |
| CLCN3    | 4q33              | 0.327941 | 4.99E-11 | 7.03E-10 |
| BAGE2    | 21p11.2           | 0.327886 | 5.03E-11 | 7.08E-10 |
| GCSH     | 16q23.2           | -0.32787 | 5.05E-11 | 7.10E-10 |
| CKS2     | 9q22.2            | -0.32785 | 5.06E-11 | 7.11E-10 |
| MAGOH    | 1p32.3            | -0.32784 | 5.07E-11 | 7.12E-10 |
| DDI2     | 1p36.21           | 0.327722 | 5.15E-11 | 7.23E-10 |
| ANKS3    | 16p13.3           | -0.32766 | 5.20E-11 | 7.29E-10 |
| AAMP     | 2q35              | -0.3276  | 5.24E-11 | 7.35E-10 |
| NDUFAB1  | 16p12.2           | -0.3275  | 5.32E-11 | 7.45E-10 |
| JMJD4    | 1q42.13           | -0.32747 | 5.34E-11 | 7.48E-10 |
| LAMA3    | 18q11.2           | 0.327454 | 5.35E-11 | 7.48E-10 |
| PGLS     | 19p13.11          | -0.32744 | 5.36E-11 | 7.49E-10 |
| FAM120B  | 6q27              | 0.327419 | 5.38E-11 | 7.51E-10 |
| CHID1    | 11p15.5           | -0.32735 | 5.43E-11 | 7.58E-10 |
| RRP1     | 21q22.3           | -0.32735 | 5.43E-11 | 7.58E-10 |
| RUVBL2   | 19q13.33          | -0.32721 | 5.54E-11 | 7.73E-10 |
| BAHD1    | 15q15.1           | 0.327081 | 5.64E-11 | 7.86E-10 |
| R3HDML   | 20q13.12          | -0.32697 | 5.73E-11 | 7.98E-10 |
| TMEM134  | 11q13.2           | -0.32696 | 5.74E-11 | 7.98E-10 |
| POLR2J4  | 7p13              | -0.32695 | 5.75E-11 | 7.98E-10 |
| TUT1     | 11q12.3           | -0.32695 | 5.75E-11 | 7.98E-10 |
| ZNF691   | 1p34.2            | -0.32693 | 5.76E-11 | 8.00E-10 |
| ZMYND11  | 10p15.3           | 0.326912 | 5.78E-11 | 8.02E-10 |
| SLIRP    | 14q24.3           | -0.3269  | 5.79E-11 | 8.02E-10 |
| PAPSS2   | 10q23.2-q23.31    | 0.326868 | 5.82E-11 | 8.06E-10 |
| DAG1     | 3p21.31           | 0.326852 | 5.83E-11 | 8.07E-10 |

|          |          |          |          |          |
|----------|----------|----------|----------|----------|
| ATXN1L   | 16q22.2  | 0.326846 | 5.83E-11 | 8.07E-10 |
| DTWD2    | 5q23.1   | 0.326827 | 5.85E-11 | 8.09E-10 |
| TMCC3    | 12q22    | 0.326766 | 5.90E-11 | 8.15E-10 |
| THAP7    | 22q11.21 | -0.32673 | 5.93E-11 | 8.18E-10 |
| APPBP2   | 17q23.2  | 0.32671  | 5.95E-11 | 8.20E-10 |
| MIF      | 22q11.23 | -0.32669 | 5.96E-11 | 8.22E-10 |
| TUBGCP4  | 15q15.3  | 0.326631 | 6.02E-11 | 8.29E-10 |
| EIF4EBP3 | 5q31.3   | -0.32653 | 6.10E-11 | 8.40E-10 |
| DRG1     | 22q12.2  | -0.32651 | 6.12E-11 | 8.42E-10 |
| TTLL9    | 20q11.21 | -0.32645 | 6.17E-11 | 8.49E-10 |
| SLC27A5  | 19q13.43 | -0.3264  | 6.22E-11 | 8.54E-10 |
| ITGB1    | 10p11.22 | 0.326335 | 6.27E-11 | 8.61E-10 |
| CRACR2A  | 12p13.32 | 0.326293 | 6.31E-11 | 8.66E-10 |
| RPL14    | 3p22.1   | -0.32626 | 6.34E-11 | 8.69E-10 |
| SNX33    | 15q24.2  | 0.326239 | 6.36E-11 | 8.71E-10 |
| SPATA2L  | 16q24.3  | -0.32616 | 6.43E-11 | 8.80E-10 |
| APRT     | 16q24.3  | -0.32615 | 6.44E-11 | 8.81E-10 |
| PTS      | 11q23.1  | -0.32606 | 6.52E-11 | 8.91E-10 |
| GLI4     | 8q24.3   | -0.32599 | 6.59E-11 | 9.00E-10 |
| RAB14    | 9q33.2   | 0.325876 | 6.69E-11 | 9.14E-10 |
| FRY      | 13q13.1  | 0.325871 | 6.70E-11 | 9.14E-10 |
| SWI5     | 9q34.11  | -0.32585 | 6.72E-11 | 9.16E-10 |
| SYNJ2BP  | 14q24.2  | 0.32581  | 6.76E-11 | 9.21E-10 |
| RPS2     | 16p13.3  | -0.32577 | 6.80E-11 | 9.26E-10 |
| SIRT3    | 11p15.5  | -0.32567 | 6.89E-11 | 9.37E-10 |
| BCAS1    | 20q13.2  | 0.325611 | 6.95E-11 | 9.45E-10 |
| CCDC58   | 3q21.1   | -0.32557 | 6.99E-11 | 9.50E-10 |
| ARF6     | 14q21.3  | 0.32551  | 7.05E-11 | 9.57E-10 |
| RPS6KC1  | 1q32.3   | 0.325474 | 7.09E-11 | 9.61E-10 |
| NPM3     | 10q24.32 | -0.32531 | 7.25E-11 | 9.83E-10 |
| MON1A    | 3p21.31  | -0.32526 | 7.30E-11 | 9.90E-10 |
| ATF7IP   | 12p13.1  | 0.325251 | 7.31E-11 | 9.90E-10 |
| PLXNA2   | 1q32.2   | 0.325185 | 7.38E-11 | 9.99E-10 |
| RHOT2    | 16p13.3  | -0.3251  | 7.47E-11 | 1.01E-09 |
| PTAFR    | 1p35.3   | 0.325064 | 7.51E-11 | 1.01E-09 |
| MEA1     | 6p21.1   | -0.32492 | 7.67E-11 | 1.04E-09 |
| SEC24D   | 4q26     | 0.324885 | 7.70E-11 | 1.04E-09 |
| PI4KA    | 22q11.21 | 0.324851 | 7.74E-11 | 1.04E-09 |
| GATAD2B  | 1q21.3   | 0.324744 | 7.85E-11 | 1.06E-09 |
| DDTL     | 22q11.23 | -0.32473 | 7.87E-11 | 1.06E-09 |
| MTCH2    | 11p11.2  | -0.32473 | 7.87E-11 | 1.06E-09 |
| APTX     | 9p21.1   | -0.32471 | 7.89E-11 | 1.06E-09 |
| ACTR2    | 2p14     | 0.324658 | 7.95E-11 | 1.07E-09 |
| NDUFA1   | Xq24     | -0.32454 | 8.08E-11 | 1.09E-09 |
| RPL23A   | 17q11.2  | -0.32453 | 8.10E-11 | 1.09E-09 |
| MTR      | 1q43     | 0.324526 | 8.10E-11 | 1.09E-09 |
| FBL      | 19q13.2  | -0.32448 | 8.15E-11 | 1.09E-09 |
| GLYCTK   | 3p21.2   | -0.3244  | 8.25E-11 | 1.10E-09 |
| STAM2    | 2q23.3   | 0.324365 | 8.29E-11 | 1.11E-09 |
| RIDA     | 8q22.2   | -0.32432 | 8.34E-11 | 1.12E-09 |
| ZMAT3    | 3q26.32  | 0.324298 | 8.36E-11 | 1.12E-09 |
| CASP7    | 10q25.3  | 0.324269 | 8.40E-11 | 1.12E-09 |
| WDR4     | 21q22.3  | -0.32425 | 8.42E-11 | 1.12E-09 |
| TCP11L2  | 12q23.3  | 0.324236 | 8.44E-11 | 1.13E-09 |
| ANKRD49  | 11q21    | -0.32419 | 8.49E-11 | 1.13E-09 |
| SESTD1   | 2q31.2   | 0.324083 | 8.62E-11 | 1.15E-09 |
| DDX6     | 11q23.3  | 0.324056 | 8.65E-11 | 1.15E-09 |
| RPS8     | 1p34.1   | -0.32406 | 8.65E-11 | 1.15E-09 |

|             |                 |          |          |          |
|-------------|-----------------|----------|----------|----------|
| ZKSCAN1     | 7q22.1          | 0.324036 | 8.68E-11 | 1.15E-09 |
| TC2N        | 14q32.12        | 0.324007 | 8.71E-11 | 1.16E-09 |
| DSN1        | 20q11.23        | -0.324   | 8.72E-11 | 1.16E-09 |
| LIN37       | 19q13.12        | -0.32394 | 8.79E-11 | 1.17E-09 |
| FAM160B1    | 10q25.3         | 0.323739 | 9.05E-11 | 1.20E-09 |
| DGAT1       | 8q24.3          | -0.32369 | 9.12E-11 | 1.21E-09 |
| CCSER2      | 10q23.1         | 0.32362  | 9.20E-11 | 1.22E-09 |
| EVI2B       | 17q11.2         | 0.323577 | 9.25E-11 | 1.23E-09 |
| CCDC130     | 19p13.13        | -0.32356 | 9.27E-11 | 1.23E-09 |
| OTUD4       | 4q31.21         | 0.323553 | 9.29E-11 | 1.23E-09 |
| ARHGAP1     | 11p11.2         | 0.323531 | 9.32E-11 | 1.23E-09 |
| WASHC4      | 12q23.3         | 0.323523 | 9.33E-11 | 1.23E-09 |
| ZFYVE9      | 1p32.3          | 0.323513 | 9.34E-11 | 1.23E-09 |
| KIF13B      | 8p12            | 0.323444 | 9.43E-11 | 1.24E-09 |
| TP53I13     | 17q11.2         | -0.32344 | 9.44E-11 | 1.24E-09 |
| YES1        | 18p11.32        | 0.323423 | 9.46E-11 | 1.25E-09 |
| SMARCA5     | 4q31.21         | 0.323128 | 9.86E-11 | 1.30E-09 |
| BIN1        | 2q14.3          | -0.32309 | 9.91E-11 | 1.30E-09 |
| CLINT1      | 5q33.3          | 0.323059 | 9.95E-11 | 1.31E-09 |
| MTF1        | 1p34.3          | 0.323016 | 1.00E-10 | 1.31E-09 |
| SUV39H1     | Xp11.23         | -0.32289 | 1.02E-10 | 1.34E-09 |
| FAM222A-AS1 | 12q24.11        | -0.32284 | 1.03E-10 | 1.35E-09 |
| GALNT1      | 18q12.2         | 0.322824 | 1.03E-10 | 1.35E-09 |
| RPL31       | 2q11.2          | -0.32282 | 1.03E-10 | 1.35E-09 |
| PROCR       | 20q11.22        | -0.3228  | 1.03E-10 | 1.35E-09 |
| PUF60       | 8q24.3          | -0.32278 | 1.03E-10 | 1.35E-09 |
| ZNF414      | 19p13.2         | -0.32277 | 1.04E-10 | 1.36E-09 |
| STOML2      | 9p13.3          | -0.32275 | 1.04E-10 | 1.36E-09 |
| E4F1        | 16p13.3         | -0.32273 | 1.04E-10 | 1.36E-09 |
| GBE1        | 3p12.2          | 0.322653 | 1.05E-10 | 1.37E-09 |
| CEMP1       | 16p13.3         | -0.32242 | 1.09E-10 | 1.42E-09 |
| SNHG32      | 6p21.33         | -0.32238 | 1.09E-10 | 1.43E-09 |
| UGCG        | 9q31.3          | 0.32231  | 1.11E-10 | 1.44E-09 |
| OGFR        | 20q13.33        | -0.32228 | 1.11E-10 | 1.44E-09 |
| ZCCHC17     | 1p35.2          | -0.32212 | 1.13E-10 | 1.47E-09 |
| SNX29       | 16p13.13-p13.12 | 0.322042 | 1.15E-10 | 1.49E-09 |
| NIPBL       | 5p13.2          | 0.321993 | 1.16E-10 | 1.50E-09 |
| AFAP1L2     | 10q25.3         | 0.321951 | 1.16E-10 | 1.51E-09 |
| MAP3K9      | 14q24.2         | 0.321875 | 1.17E-10 | 1.52E-09 |
| SKIL        | 3q26.2          | 0.32187  | 1.18E-10 | 1.52E-09 |
| DNPH1       | 6p21.1          | -0.32183 | 1.18E-10 | 1.53E-09 |
| TAF1D       | 11q21           | -0.32182 | 1.18E-10 | 1.53E-09 |
| PRAP1       | 10q26.3         | -0.32169 | 1.21E-10 | 1.56E-09 |
| BHLHE41     | 12p12.1         | 0.321628 | 1.22E-10 | 1.57E-09 |
| MAGI3       | 1p13.2          | 0.321605 | 1.22E-10 | 1.58E-09 |
| VPS51       | 11q13.1         | -0.32159 | 1.22E-10 | 1.58E-09 |
| RSPRY1      | 16q13           | 0.321529 | 1.23E-10 | 1.59E-09 |
| DCUN1D1     | 3q26.33         | 0.32145  | 1.25E-10 | 1.61E-09 |
| SLC17A5     | 6q13            | 0.321427 | 1.25E-10 | 1.61E-09 |
| AAR2        | 20q11.23        | -0.32141 | 1.25E-10 | 1.61E-09 |
| SGCB        | 4q12            | 0.321349 | 1.26E-10 | 1.63E-09 |
| GNPDA1      | 5q31.3          | -0.3213  | 1.27E-10 | 1.64E-09 |
| NOL7        | 6p23            | -0.32128 | 1.28E-10 | 1.64E-09 |
| SLC39A4     | 8q24.3          | -0.32121 | 1.29E-10 | 1.66E-09 |
| PTGES2-AS1  | 9q34.11         | -0.32119 | 1.29E-10 | 1.66E-09 |
| MAP2K2      | 19p13.3         | -0.32117 | 1.29E-10 | 1.66E-09 |
| MMAB        | 12q24.11        | -0.32113 | 1.30E-10 | 1.67E-09 |
| NBPF10      | 1q21.1          | 0.321118 | 1.30E-10 | 1.67E-09 |

|           |                       |          |          |          |
|-----------|-----------------------|----------|----------|----------|
| SAMD9     | 7q21.2                | 0.321099 | 1.31E-10 | 1.68E-09 |
| FTSJ1     | Xp11.23               | -0.32108 | 1.31E-10 | 1.68E-09 |
| PFDN4     | 20q13.2               | -0.3207  | 1.38E-10 | 1.77E-09 |
| RBFOX2    | 22q12.3               | 0.320652 | 1.39E-10 | 1.78E-09 |
| SNRNP25   | 16p13.3               | -0.32055 | 1.41E-10 | 1.80E-09 |
| PLSCR4    | 3q24                  | 0.320425 | 1.44E-10 | 1.83E-09 |
| RTL6      | 22q13.31              | 0.320357 | 1.45E-10 | 1.85E-09 |
| PPIAL4G   | 1q21.2                | -0.32033 | 1.46E-10 | 1.86E-09 |
| KIF1B     | 1p36.22               | 0.320299 | 1.46E-10 | 1.86E-09 |
| PES1      | 22q12.2               | -0.32026 | 1.47E-10 | 1.87E-09 |
| IFT43     | 14q24.3               | -0.32013 | 1.50E-10 | 1.90E-09 |
| PTCD1     | 7q22.1                | -0.32006 | 1.51E-10 | 1.92E-09 |
| IRS1      | 2q36.3                | 0.319928 | 1.54E-10 | 1.96E-09 |
| FOXJ2     | 12p13.31              | 0.319841 | 1.56E-10 | 1.98E-09 |
| LRBA      | 4q31.3                | 0.319748 | 1.58E-10 | 2.00E-09 |
| LRWD1     | 7q22.1                | -0.31967 | 1.60E-10 | 2.02E-09 |
| ENDOG     | 9q34.11               | -0.31962 | 1.61E-10 | 2.04E-09 |
| MEF2D     | 1q22                  | 0.319614 | 1.61E-10 | 2.04E-09 |
| ALG5      | 13q13.3               | -0.31952 | 1.63E-10 | 2.06E-09 |
| APP       | 21q21.3               | 0.319518 | 1.63E-10 | 2.06E-09 |
| ORC6      | 16q11.2               | -0.31946 | 1.64E-10 | 2.07E-09 |
| TLR6      | 4p14                  | 0.319458 | 1.64E-10 | 2.07E-09 |
| TAF1C     | 16q24.1               | -0.31944 | 1.65E-10 | 2.08E-09 |
| TRAK1     | 3p22.1                | 0.31939  | 1.66E-10 | 2.09E-09 |
| LYRM1     | 16p12.3               | -0.31932 | 1.67E-10 | 2.11E-09 |
| ERC1      | 12p13.33              | 0.319255 | 1.69E-10 | 2.13E-09 |
| ELK4      | 1q32.1                | 0.31917  | 1.71E-10 | 2.15E-09 |
| SPECC1L   | 22q11.23              | 0.319127 | 1.72E-10 | 2.16E-09 |
| SERGEF    | 11p15.1               | -0.31908 | 1.73E-10 | 2.18E-09 |
| PRKCZ     | 1p36.33               | -0.31906 | 1.74E-10 | 2.18E-09 |
| CARD19    | 9q22.31               | -0.31905 | 1.74E-10 | 2.18E-09 |
| MLXIP     | 12q24.31              | 0.319016 | 1.75E-10 | 2.19E-09 |
| RPS11     | 19q13.33              | -0.31899 | 1.75E-10 | 2.20E-09 |
| WAC       | 10p12.1 10p12.1-p11.2 | 0.318976 | 1.76E-10 | 2.20E-09 |
| ISOC2     | 19q13.42              | -0.31897 | 1.76E-10 | 2.20E-09 |
| SLC8A1    | 2p22.1                | 0.318935 | 1.77E-10 | 2.21E-09 |
| MTMR3     | 22q12.2               | 0.318825 | 1.79E-10 | 2.24E-09 |
| MUTYH     | 1p34.1                | -0.31872 | 1.82E-10 | 2.27E-09 |
| TMEM42    | 3p21.31               | -0.31862 | 1.84E-10 | 2.31E-09 |
| POLR3H    | 22q13.2               | -0.31861 | 1.85E-10 | 2.31E-09 |
| DAPK1     | 9q21.33               | 0.318601 | 1.85E-10 | 2.31E-09 |
| CGGBP1    | 3p11.1                | 0.318584 | 1.85E-10 | 2.31E-09 |
| TVP23B    | 17p11.2               | 0.318562 | 1.86E-10 | 2.32E-09 |
| RAI1      | 17p11.2               | 0.318488 | 1.88E-10 | 2.34E-09 |
| LYPLA2P1  | 6p21.32               | -0.31847 | 1.88E-10 | 2.34E-09 |
| XRN1      | 3q23                  | 0.31846  | 1.88E-10 | 2.35E-09 |
| MRPL32    | 7p14.1                | -0.31845 | 1.89E-10 | 2.35E-09 |
| TKT       | 3p21.1                | -0.31842 | 1.89E-10 | 2.36E-09 |
| ZNF76     | 6p21.31               | -0.31839 | 1.90E-10 | 2.37E-09 |
| RPL32     | 3p25.2                | -0.31823 | 1.95E-10 | 2.42E-09 |
| LOC256880 | 4q23                  | -0.31822 | 1.95E-10 | 2.42E-09 |
| FER1L6    | 8q24.13               | 0.318193 | 1.96E-10 | 2.42E-09 |
| TXNDC12   | 1p32.3                | -0.31818 | 1.96E-10 | 2.43E-09 |
| DPM1      | 20q13.13              | -0.31815 | 1.97E-10 | 2.44E-09 |
| COMMD9    | 11p13                 | -0.31813 | 1.97E-10 | 2.44E-09 |
| ZNF524    | 19q13.42              | -0.31811 | 1.98E-10 | 2.45E-09 |
| ETS1      | 11q24.3               | 0.318065 | 1.99E-10 | 2.46E-09 |
| RPF2      | 6q21                  | -0.31807 | 1.99E-10 | 2.46E-09 |

|           |                 |          |          |          |
|-----------|-----------------|----------|----------|----------|
| ETV3L     | 1q23.1          | 0.318002 | 2.01E-10 | 2.48E-09 |
| BSCL2     | 11q12.3         | -0.318   | 2.01E-10 | 2.48E-09 |
| BRI3      | 7q21.3          | -0.31798 | 2.01E-10 | 2.48E-09 |
| BRPF3     | 6p21.31         | 0.317867 | 2.04E-10 | 2.52E-09 |
| TNPO1     | 5q13.2          | 0.317738 | 2.08E-10 | 2.56E-09 |
| CLIC5     | 6p21.1          | 0.317685 | 2.10E-10 | 2.58E-09 |
| ATF2      | 2q31.1          | 0.317642 | 2.11E-10 | 2.59E-09 |
| RBM47     | 4p14            | 0.317617 | 2.12E-10 | 2.60E-09 |
| RAB5A     | 3p24.3          | 0.317511 | 2.15E-10 | 2.64E-09 |
| TPD52L2   | 20q13.33        | -0.31749 | 2.15E-10 | 2.64E-09 |
| ARPC5L    | 9q33.3          | -0.31716 | 2.25E-10 | 2.76E-09 |
| TTC28-AS1 | 22q12.1         | -0.31716 | 2.25E-10 | 2.76E-09 |
| SLC16A7   | 12q14.1         | 0.317128 | 2.26E-10 | 2.77E-09 |
| TOB2      | 22q13.2         | 0.317114 | 2.27E-10 | 2.78E-09 |
| SPACA3    | 17q11.2         | -0.31711 | 2.27E-10 | 2.78E-09 |
| PGAP2     | 11p15.4         | -0.3171  | 2.27E-10 | 2.78E-09 |
| CCDC137   | 17q25.3         | -0.31701 | 2.30E-10 | 2.81E-09 |
| ZBTB8OS   | 1p35.1          | -0.3168  | 2.37E-10 | 2.89E-09 |
| PLCE1     | 10q23.33        | 0.316676 | 2.41E-10 | 2.94E-09 |
| ATP7A     | Xq21.1          | 0.316654 | 2.41E-10 | 2.95E-09 |
| GTF2F2    | 13q14.12-q14.13 | -0.31656 | 2.45E-10 | 2.98E-09 |
| RALBP1    | 18p11.22        | 0.31649  | 2.47E-10 | 3.01E-09 |
| SLCO2A1   | 3q22.1-q22.2    | 0.316487 | 2.47E-10 | 3.01E-09 |
| ATP5PD    | 17q25.1         | -0.31638 | 2.51E-10 | 3.05E-09 |
| CLNS1A    | 11q14.1         | -0.31627 | 2.55E-10 | 3.10E-09 |
| POLR2C    | 16q21           | -0.31626 | 2.55E-10 | 3.10E-09 |
| VPS13B    | 8q22.2          | 0.316235 | 2.56E-10 | 3.11E-09 |
| FAM45BP   | Xq26.1          | 0.316222 | 2.56E-10 | 3.11E-09 |
| ALYREF    | 17q25.3         | -0.31619 | 2.57E-10 | 3.12E-09 |
| TLN1      | 9p13.3          | 0.316155 | 2.59E-10 | 3.14E-09 |
| KRTCAP2   | 1q22            | -0.3161  | 2.60E-10 | 3.16E-09 |
| STAT3     | 17q21.2         | 0.316062 | 2.62E-10 | 3.17E-09 |
| HCFC2     | 12q23.3         | 0.316046 | 2.62E-10 | 3.18E-09 |
| KIAA1217  | 10p12.2-p12.1   | 0.316044 | 2.62E-10 | 3.18E-09 |
| DEXI      | 16p13.13        | -0.31596 | 2.65E-10 | 3.21E-09 |
| TEX264    | 3p21.2          | -0.31596 | 2.66E-10 | 3.21E-09 |
| RFT1      | 3p21.1          | -0.31588 | 2.68E-10 | 3.24E-09 |
| EXOSC3    | 9p13.2          | -0.31584 | 2.70E-10 | 3.26E-09 |
| UAP1      | 1q23.3          | 0.315812 | 2.71E-10 | 3.27E-09 |
| GSTP1     | 11q13.2         | -0.31576 | 2.73E-10 | 3.29E-09 |
| MGAT5     | 2q21.2-q21.3    | 0.315736 | 2.74E-10 | 3.30E-09 |
| MYL6B     | 12q13.2         | -0.31567 | 2.76E-10 | 3.33E-09 |
| RCAN3     | 1p36.11         | 0.315613 | 2.78E-10 | 3.35E-09 |
| C10ORF12  | 10q24.1         | 0.315452 | 2.84E-10 | 3.42E-09 |
| CDK5RAP3  | 17q21.32        | -0.31537 | 2.88E-10 | 3.46E-09 |
| BCL2      | 18q21.33        | 0.315364 | 2.88E-10 | 3.46E-09 |
| LRRC45    | 17q25.3         | -0.31534 | 2.89E-10 | 3.47E-09 |
| TMEM120B  | 12q24.31        | -0.31531 | 2.90E-10 | 3.48E-09 |
| THOC6     | 16p13.3         | -0.31528 | 2.91E-10 | 3.49E-09 |
| BAG5      | 14q32.33        | 0.315196 | 2.95E-10 | 3.53E-09 |
| MMUT      | 6p12.3          | 0.315179 | 2.95E-10 | 3.54E-09 |
| PDCD2     | 6q27            | -0.31516 | 2.96E-10 | 3.54E-09 |
| SLC9A2    | 2q12.1          | 0.315097 | 2.99E-10 | 3.57E-09 |
| EIF4EBP1  | 8p11.23         | -0.31508 | 2.99E-10 | 3.58E-09 |
| VPS13D    | 1p36.22-p36.21  | 0.314913 | 3.06E-10 | 3.66E-09 |
| SPTY2D1   | 11p15.1         | 0.314912 | 3.06E-10 | 3.66E-09 |
| ZNF366    | 5q13.2 5q13.2   | 0.314892 | 3.07E-10 | 3.66E-09 |
| SUZ12P1   | 17q11.2         | -0.31479 | 3.11E-10 | 3.71E-09 |



|            |                  |          |          |          |
|------------|------------------|----------|----------|----------|
| POP5       | 12q24.31         | -0.31475 | 3.13E-10 | 3.73E-09 |
| BID        | 22q11.21         | -0.31475 | 3.13E-10 | 3.73E-09 |
| MED4       | 13q14.2          | -0.31474 | 3.13E-10 | 3.73E-09 |
| HEMK1      | 3p21.31          | -0.31467 | 3.16E-10 | 3.76E-09 |
| DCAF13     | 8q22.3           | -0.31466 | 3.17E-10 | 3.77E-09 |
| TCTE3      | 6q27             | -0.31451 | 3.23E-10 | 3.84E-09 |
| GNE        | 9p13.3           | 0.314434 | 3.27E-10 | 3.88E-09 |
| GIT1       | 17q11.2          | -0.31442 | 3.27E-10 | 3.89E-09 |
| ETFB       | 19q13.41         | -0.3144  | 3.28E-10 | 3.89E-09 |
| ERMARD     | 6q27             | -0.31432 | 3.32E-10 | 3.93E-09 |
| IMP4       | 2q21.1           | -0.31428 | 3.34E-10 | 3.95E-09 |
| MRPL40     | 22q11.21         | -0.31426 | 3.34E-10 | 3.96E-09 |
| SHARPIN    | 8q24.3           | -0.31425 | 3.35E-10 | 3.96E-09 |
| MZT2B      | 2q21.1           | -0.31425 | 3.35E-10 | 3.96E-09 |
| FADS3      | 11q12.2          | -0.31419 | 3.38E-10 | 3.99E-09 |
| RHOD       | 11q13.2          | -0.3141  | 3.42E-10 | 4.04E-09 |
| ERO1A      | 14q22.1          | 0.313862 | 3.53E-10 | 4.17E-09 |
| SPATA18    | 4q12             | 0.313844 | 3.54E-10 | 4.18E-09 |
| MED13      | 17q23.2          | 0.313808 | 3.56E-10 | 4.19E-09 |
| BBX        | 3q13.12          | 0.313773 | 3.57E-10 | 4.21E-09 |
| RIOK3      | 18q11.2          | 0.313773 | 3.57E-10 | 4.21E-09 |
| PRDX4      | Xp22.11          | -0.31374 | 3.59E-10 | 4.22E-09 |
| GALK1      | 17q25.1          | -0.31373 | 3.60E-10 | 4.23E-09 |
| KIF9       | 3p21.31          | -0.31372 | 3.60E-10 | 4.23E-09 |
| NEU1       | 6p21.33          | -0.31351 | 3.70E-10 | 4.35E-09 |
| CHD3       | 17p13.1          | 0.313471 | 3.72E-10 | 4.37E-09 |
| PALLD      | 4q32.3           | 0.313391 | 3.76E-10 | 4.42E-09 |
| TLR4       | 9q33.1           | 0.313331 | 3.79E-10 | 4.45E-09 |
| ARNT2      | 15q25.1          | 0.313256 | 3.83E-10 | 4.49E-09 |
| GDF9       | 5q31.1           | -0.31325 | 3.83E-10 | 4.49E-09 |
| NDUFS7     | 19p13.3          | -0.31324 | 3.84E-10 | 4.50E-09 |
| SPATA24    | 5q31.2           | -0.31311 | 3.91E-10 | 4.58E-09 |
| EGFL8      | 6p21.32          | -0.3131  | 3.91E-10 | 4.58E-09 |
| TRAPPC8    | 18q12.1          | 0.313049 | 3.94E-10 | 4.61E-09 |
| COX6A1     | 12q24.31 12q24.2 | -0.31296 | 3.99E-10 | 4.66E-09 |
| TIMM29     | 19p13.2          | -0.31284 | 4.05E-10 | 4.73E-09 |
| TMEM74B    | 20p13            | -0.31282 | 4.06E-10 | 4.74E-09 |
| DICER1-AS1 | 14q32.13         | -0.31281 | 4.07E-10 | 4.75E-09 |
| MRPL43     | 10q24.31         | -0.3128  | 4.07E-10 | 4.75E-09 |
| EDF1       | 9q34.3           | -0.31273 | 4.11E-10 | 4.79E-09 |
| FAM122A    | 9q21.11          | 0.312688 | 4.14E-10 | 4.82E-09 |
| LENG1      | 19q13.42         | -0.31265 | 4.16E-10 | 4.84E-09 |
| SCNM1      | 1q21.3           | -0.31265 | 4.16E-10 | 4.84E-09 |
| CTNBL1     | 20q11.23         | -0.31262 | 4.17E-10 | 4.85E-09 |
| RHPN1      | 8q24.3           | -0.31261 | 4.18E-10 | 4.86E-09 |
| DEF8       | 16q24.3          | -0.31227 | 4.37E-10 | 5.08E-09 |
| TXNIP      | 1q21.1           | 0.312228 | 4.40E-10 | 5.11E-09 |
| MRM2       | 7p22.3           | -0.31221 | 4.41E-10 | 5.11E-09 |
| TRAM2      | 6p12.2           | 0.312131 | 4.46E-10 | 5.17E-09 |
| GCDH       | 19p13.13         | -0.31206 | 4.50E-10 | 5.21E-09 |
| METTL5     | 2q31.1           | -0.31199 | 4.55E-10 | 5.26E-09 |
| HIVEP1     | 6p24.1           | 0.311943 | 4.57E-10 | 5.29E-09 |
| ARHGAP26   | 5q31.3           | 0.31194  | 4.57E-10 | 5.29E-09 |
| MFS12      | 19p13.3          | -0.3119  | 4.60E-10 | 5.31E-09 |
| CEL2       | 10p14            | 0.31185  | 4.63E-10 | 5.35E-09 |
| TEAD4      | 12p13.33         | -0.31182 | 4.65E-10 | 5.37E-09 |
| PPP4R1     | 18p11.22         | 0.311774 | 4.68E-10 | 5.40E-09 |
| MGMT       | 10q26.3          | -0.31172 | 4.71E-10 | 5.43E-09 |

|           |                    |          |          |          |
|-----------|--------------------|----------|----------|----------|
| URAHP     | 16q24.3            | -0.31161 | 4.78E-10 | 5.51E-09 |
| TLR7      | Xp22.2             | 0.311583 | 4.80E-10 | 5.53E-09 |
| SLC35E1   | 19p13.11           | 0.311546 | 4.82E-10 | 5.55E-09 |
| LMTK2     | 7q21.3             | 0.311542 | 4.83E-10 | 5.55E-09 |
| EEF1AKMT1 | 13q12.11           | -0.31151 | 4.85E-10 | 5.57E-09 |
| SLC44A2   | 19p13.2            | 0.311434 | 4.90E-10 | 5.63E-09 |
| EHHADH    | 3q27.2             | 0.311413 | 4.91E-10 | 5.64E-09 |
| IPMK      | 10q21.1            | 0.311375 | 4.94E-10 | 5.66E-09 |
| STRN3     | 14q12              | 0.311329 | 4.97E-10 | 5.70E-09 |
| SLC39A6   | 18q12.2            | 0.311311 | 4.98E-10 | 5.71E-09 |
| LOC728743 | 7q36.1             | -0.31128 | 5.00E-10 | 5.72E-09 |
| USP34     | 2p15               | 0.311276 | 5.00E-10 | 5.73E-09 |
| ZNF791    | 19p13.13           | 0.311247 | 5.02E-10 | 5.75E-09 |
| SMIM1     | 1p36.32            | -0.31123 | 5.03E-10 | 5.75E-09 |
| PRR14L    | 22q12.2            | 0.311226 | 5.03E-10 | 5.76E-09 |
| RPS15A    | 16p12.3            | -0.31122 | 5.04E-10 | 5.76E-09 |
| CD180     | 5q12.3             | 0.311139 | 5.09E-10 | 5.82E-09 |
| KIDINS220 | 2p25.1             | 0.311102 | 5.12E-10 | 5.84E-09 |
| COP5      | 8q13.1             | -0.31109 | 5.13E-10 | 5.85E-09 |
| FZD1      | 7q21.13            | 0.310933 | 5.24E-10 | 5.97E-09 |
| PARD3B    | 2q33.3             | 0.310919 | 5.25E-10 | 5.98E-09 |
| CTDSP2    | 12q14.1            | 0.310846 | 5.30E-10 | 6.03E-09 |
| NCK1      | 3q22.3             | 0.310769 | 5.35E-10 | 6.09E-09 |
| NIPAL2    | 8q22.2             | 0.310747 | 5.37E-10 | 6.11E-09 |
| CAMKMT    | 2p21               | -0.3107  | 5.40E-10 | 6.14E-09 |
| ATP2C1    | 3q22.1             | 0.310646 | 5.44E-10 | 6.18E-09 |
| DCAF6     | 1q24.2             | 0.310575 | 5.49E-10 | 6.24E-09 |
| AGBL5     | 2p23.3             | -0.3105  | 5.55E-10 | 6.30E-09 |
| SLC39A3   | 19p13.3            | -0.31048 | 5.56E-10 | 6.31E-09 |
| EPS15     | 1p32.3             | 0.310451 | 5.58E-10 | 6.33E-09 |
| ASMTL-AS1 | Xp22.33 and Yp11.2 | -0.31042 | 5.61E-10 | 6.36E-09 |
| SETBP1    | 18q12.3            | 0.310395 | 5.63E-10 | 6.37E-09 |
| HEATR5B   | 2p22.2             | 0.310334 | 5.67E-10 | 6.42E-09 |
| RPS19BP1  | 22q13.1            | -0.31032 | 5.68E-10 | 6.42E-09 |
| ELP6      | 3p21.31            | -0.31022 | 5.76E-10 | 6.51E-09 |
| LPIN3     | 20q12              | -0.31017 | 5.80E-10 | 6.55E-09 |
| TMED10    | 14q24.3            | 0.310094 | 5.86E-10 | 6.61E-09 |
| CENPS     | 1p36.22            | -0.31008 | 5.87E-10 | 6.62E-09 |
| IARS2     | 1q41               | 0.310078 | 5.87E-10 | 6.62E-09 |
| MIR17HG   | 13q31.3            | -0.31004 | 5.90E-10 | 6.65E-09 |
| AP4M1     | 7q22.1             | -0.31002 | 5.92E-10 | 6.67E-09 |
| SNX21     | 20q13.12           | -0.30997 | 5.95E-10 | 6.70E-09 |
| FIBP      | 11q13.1            | -0.30989 | 6.02E-10 | 6.77E-09 |
| UBE2H     | 7q32.2             | 0.309843 | 6.06E-10 | 6.81E-09 |
| FKBP2     | 11q13.1            | -0.30984 | 6.06E-10 | 6.81E-09 |
| TMPPE     | 3p22.3             | 0.309794 | 6.10E-10 | 6.85E-09 |
| RPL34     | 4q25               | -0.30979 | 6.10E-10 | 6.85E-09 |
| C12ORF10  | 12q13.13           | -0.30974 | 6.14E-10 | 6.89E-09 |
| NDUFA4    | 7p21.3             | -0.30971 | 6.17E-10 | 6.91E-09 |
| OAZ1      | 19p13.3            | -0.3097  | 6.17E-10 | 6.91E-09 |
| TMEM199   | 17q11.2            | -0.30967 | 6.20E-10 | 6.94E-09 |
| TRANK1    | 3p22.2             | 0.309617 | 6.24E-10 | 6.99E-09 |
| MRPL34    | 19p13.11           | -0.30958 | 6.27E-10 | 7.02E-09 |
| EIF2B3    | 1p34.1             | -0.30956 | 6.29E-10 | 7.03E-09 |
| NCOA1     | 2p23.3             | 0.309534 | 6.31E-10 | 7.05E-09 |
| CUTC      | 10q24.2            | -0.3094  | 6.42E-10 | 7.17E-09 |
| GSTO1     | 10q25.1            | -0.3094  | 6.43E-10 | 7.18E-09 |
| TKFC      | 11q12.2            | -0.30939 | 6.43E-10 | 7.18E-09 |

|          |                 |          |          |          |
|----------|-----------------|----------|----------|----------|
| RNF169   | 11q13.4         | 0.309383 | 6.44E-10 | 7.18E-09 |
| RELL2    | 5q31.3          | -0.30938 | 6.44E-10 | 7.18E-09 |
| CLPP     | 19p13.3         | -0.30929 | 6.52E-10 | 7.26E-09 |
| SNX6     | 14q13.1         | 0.309217 | 6.58E-10 | 7.33E-09 |
| CCDC34   | 11p14.1         | -0.30919 | 6.61E-10 | 7.36E-09 |
| POLR1D   | 13q12.2         | -0.30907 | 6.71E-10 | 7.47E-09 |
| PLXNC1   | 12q22           | 0.309051 | 6.73E-10 | 7.48E-09 |
| NGRN     | 15q26.1         | 0.30903  | 6.75E-10 | 7.50E-09 |
| SEC61G   | 7p11.2          | -0.30885 | 6.91E-10 | 7.67E-09 |
| CDCA3    | 12p13.31        | -0.30875 | 7.00E-10 | 7.77E-09 |
| TMEM132B | 12q24.31-q24.32 | 0.308729 | 7.02E-10 | 7.79E-09 |
| PARL     | 3q27.1          | -0.30867 | 7.08E-10 | 7.85E-09 |
| MRPS7    | 17q25.1         | -0.30861 | 7.13E-10 | 7.90E-09 |
| MTG2     | 20q13.33        | -0.30859 | 7.15E-10 | 7.92E-09 |
| TP53RK   | 20q13.12        | -0.30859 | 7.16E-10 | 7.92E-09 |
| GNAI1    | 7q21.11         | 0.308557 | 7.19E-10 | 7.95E-09 |
| PLEKHM1  | 17q21.31        | 0.308553 | 7.19E-10 | 7.95E-09 |
| COPE     | 19p13.11        | -0.30849 | 7.25E-10 | 8.00E-09 |
| BRWD3    | Xq21.1          | 0.308447 | 7.29E-10 | 8.05E-09 |
| TMEM127  | 2q11.2          | 0.308381 | 7.36E-10 | 8.12E-09 |
| HERC2    | 15q13.1         | 0.308364 | 7.37E-10 | 8.13E-09 |
| PIK3C3   | 18q12.3         | 0.308361 | 7.38E-10 | 8.13E-09 |
| SNX18    | 5q11.2          | 0.308295 | 7.44E-10 | 8.20E-09 |
| RBMX2    | Xq26.1          | -0.30821 | 7.52E-10 | 8.28E-09 |
| HSF4     | 16q22.1         | -0.30812 | 7.62E-10 | 8.38E-09 |
| CDC42SE1 | 1q21.3          | 0.307941 | 7.80E-10 | 8.58E-09 |
| PKN2     | 1p22.2          | 0.307795 | 7.95E-10 | 8.74E-09 |
| RPPH1    | 14q11.2         | -0.30775 | 7.99E-10 | 8.78E-09 |
| PHLPP1   | 18q21.33        | 0.307746 | 8.00E-10 | 8.79E-09 |
| SH3GLB2  | 9q34.11         | -0.30771 | 8.04E-10 | 8.82E-09 |
| PGGT1B   | 5q22.3          | 0.307679 | 8.07E-10 | 8.85E-09 |
| DLG5     | 10q22.3         | 0.307469 | 8.30E-10 | 9.10E-09 |
| ZP3      | 7q11.23         | -0.30746 | 8.31E-10 | 9.10E-09 |
| BDP1     | 5q13.2          | 0.307419 | 8.36E-10 | 9.15E-09 |
| C1RL     | 12p13.31        | 0.307394 | 8.38E-10 | 9.17E-09 |
| RPS5     | 19q13.43        | -0.30734 | 8.45E-10 | 9.24E-09 |
| WRNIP1   | 6p25.2          | -0.3072  | 8.60E-10 | 9.40E-09 |
| COX17    | 3q13.33         | -0.30716 | 8.64E-10 | 9.44E-09 |
| ASCC3    | 6q16.3          | 0.307148 | 8.66E-10 | 9.46E-09 |
| RAD54L2  | 3p21.2          | 0.307135 | 8.67E-10 | 9.47E-09 |
| POMP     | 13q12.3         | -0.30708 | 8.74E-10 | 9.53E-09 |
| NEK3     | 13q14.3         | -0.30692 | 8.92E-10 | 9.73E-09 |
| SURF1    | 9q34.2          | -0.30691 | 8.94E-10 | 9.74E-09 |
| CFAP298  | 21q22.11        | -0.30689 | 8.96E-10 | 9.76E-09 |
| EEF2KMT  | 16p13.3         | -0.30687 | 8.98E-10 | 9.77E-09 |
| ABCF2    | 7q36.1          | -0.30684 | 9.02E-10 | 9.82E-09 |
| POLR2D   | 2q14.3          | -0.30677 | 9.11E-10 | 9.90E-09 |
| GALNT5   | 2q24.1          | 0.306659 | 9.24E-10 | 1.00E-08 |
| MYPOP    | 19q13.32        | -0.30665 | 9.24E-10 | 1.00E-08 |
| COASY    | 17q21.2         | -0.30663 | 9.27E-10 | 1.01E-08 |
| HEG1     | 3q21.2          | 0.306635 | 9.27E-10 | 1.01E-08 |
| UNC5B    | 10q22.1         | 0.306557 | 9.36E-10 | 1.02E-08 |
| SGPP1    | 14q23.2         | 0.306474 | 9.46E-10 | 1.03E-08 |
| KLHL17   | 1p36.33         | -0.30645 | 9.49E-10 | 1.03E-08 |
| TUT7     | 9q21.33         | 0.306434 | 9.51E-10 | 1.03E-08 |
| RELCH    | 18q21.33        | 0.306297 | 9.69E-10 | 1.05E-08 |
| CARM1    | 19p13.2         | -0.30628 | 9.71E-10 | 1.05E-08 |
| CDADC1   | 13q14.2         | -0.30613 | 9.91E-10 | 1.07E-08 |

|            |          |          |          |          |
|------------|----------|----------|----------|----------|
| LINC01816  | 2p13.3   | -0.30612 | 9.91E-10 | 1.07E-08 |
| LITAF      | 16p13.13 | 0.306083 | 9.96E-10 | 1.08E-08 |
| ZFYVE1     | 14q24.2  | 0.306009 | 1.01E-09 | 1.09E-08 |
| LGR4       | 11p14.1  | 0.305913 | 1.02E-09 | 1.10E-08 |
| DVL1       | 1p36.33  | -0.30589 | 1.02E-09 | 1.10E-08 |
| CDKL1      | 14q21.3  | 0.305866 | 1.03E-09 | 1.10E-08 |
| PACSIN2    | 22q13.2  | 0.305607 | 1.06E-09 | 1.14E-08 |
| ADAT2      | 6q24.2   | -0.30531 | 1.10E-09 | 1.19E-08 |
| MRPS25     | 3p25.1   | -0.30531 | 1.10E-09 | 1.19E-08 |
| DNAJC30    | 7q11.23  | -0.30512 | 1.13E-09 | 1.22E-08 |
| PHAX       | 5q23.2   | 0.305107 | 1.13E-09 | 1.22E-08 |
| EPC2       | 2q23.1   | 0.305059 | 1.14E-09 | 1.22E-08 |
| ADPRHL2    | 1p34.3   | -0.30505 | 1.14E-09 | 1.22E-08 |
| PHKG2      | 16p11.2  | -0.30505 | 1.14E-09 | 1.22E-08 |
| NF1        | 17q11.2  | 0.305034 | 1.14E-09 | 1.23E-08 |
| KIFC2      | 8q24.3   | -0.305   | 1.15E-09 | 1.23E-08 |
| CLASP2     | 3p22.3   | 0.304991 | 1.15E-09 | 1.23E-08 |
| CPD        | 17q11.2  | 0.304914 | 1.16E-09 | 1.24E-08 |
| POR        | 7q11.23  | -0.30488 | 1.17E-09 | 1.25E-08 |
| CYP2R1     | 11p15.2  | -0.30488 | 1.17E-09 | 1.25E-08 |
| CLPB       | 11q13.4  | -0.30487 | 1.17E-09 | 1.25E-08 |
| SLC12A9    | 7q22.1   | -0.30482 | 1.18E-09 | 1.26E-08 |
| TLR3       | 4q35.1   | 0.304794 | 1.18E-09 | 1.26E-08 |
| ADSL       | 22q13.1  | -0.30478 | 1.18E-09 | 1.26E-08 |
| ADSS       | 1q44     | 0.304736 | 1.19E-09 | 1.27E-08 |
| GPR137B    | 1q42.3   | 0.30459  | 1.21E-09 | 1.29E-08 |
| MDH2       | 7q11.23  | -0.30455 | 1.22E-09 | 1.30E-08 |
| TPD52L1    | 6q22.31  | -0.30452 | 1.22E-09 | 1.30E-08 |
| GTF2H4     | 6p21.33  | -0.30443 | 1.24E-09 | 1.32E-08 |
| LRRC8C     | 1p22.2   | 0.30443  | 1.24E-09 | 1.32E-08 |
| ENPP4      | 6p21.1   | 0.304381 | 1.25E-09 | 1.32E-08 |
| MICALCL    | 11p15.3  | 0.304335 | 1.25E-09 | 1.33E-08 |
| AGO4       | 1p34.3   | 0.304313 | 1.26E-09 | 1.33E-08 |
| NCSTN      | 1q23.2   | 0.304231 | 1.27E-09 | 1.35E-08 |
| MRPL18     | 6q25.3   | -0.3042  | 1.28E-09 | 1.35E-08 |
| CREB3L2    | 7q33     | 0.304105 | 1.29E-09 | 1.37E-08 |
| FICD       | 12q23.3  | 0.303952 | 1.32E-09 | 1.40E-08 |
| PAXIP1-AS1 | 7q36.2   | -0.30395 | 1.32E-09 | 1.40E-08 |
| RBM27      | 5q32     | 0.303931 | 1.32E-09 | 1.40E-08 |
| ZBTB7C     | 18q21.1  | 0.303869 | 1.33E-09 | 1.41E-08 |
| KLHDC10    | 7q32.2   | 0.303744 | 1.35E-09 | 1.43E-08 |
| ZNF789     | 7q22.1   | -0.30374 | 1.35E-09 | 1.43E-08 |
| NDEL1      | 17p13.1  | 0.303703 | 1.36E-09 | 1.44E-08 |
| TUBGCP5    | 15q11.2  | 0.303688 | 1.36E-09 | 1.44E-08 |
| CHCHD1     | 10q22.2  | -0.30367 | 1.37E-09 | 1.44E-08 |
| SSC4D      | 7q11.23  | -0.30365 | 1.37E-09 | 1.45E-08 |
| MRPL47     | 3q26.33  | -0.30359 | 1.38E-09 | 1.45E-08 |
| MESD       | 15q25.1  | 0.303582 | 1.38E-09 | 1.46E-08 |
| SDK2       | 17q25.1  | 0.303544 | 1.39E-09 | 1.46E-08 |
| TSR2       | Xp11.22  | -0.30352 | 1.39E-09 | 1.47E-08 |
| RHBDD3     | 22q12.2  | -0.30352 | 1.39E-09 | 1.47E-08 |
| NOP9       | 14q12    | 0.30348  | 1.40E-09 | 1.47E-08 |
| ARSJ       | 4q26     | 0.303437 | 1.41E-09 | 1.48E-08 |
| CMC4       | Xq28     | -0.3034  | 1.42E-09 | 1.49E-08 |
| SQOR       | 15q21.1  | 0.303336 | 1.43E-09 | 1.50E-08 |
| PSPH       | 7p11.2   | -0.30318 | 1.46E-09 | 1.53E-08 |
| RANGRF     | 17p13.1  | -0.30315 | 1.46E-09 | 1.53E-08 |
| ARIH2OS    | 3p21.31  | -0.30314 | 1.46E-09 | 1.53E-08 |

|          |              |          |          |          |
|----------|--------------|----------|----------|----------|
| ARHGEF2  | 1q22         | 0.303131 | 1.47E-09 | 1.54E-08 |
| DDX10    | 11q22.3      | -0.30312 | 1.47E-09 | 1.54E-08 |
| TRAF4    | 17q11.2      | -0.30303 | 1.49E-09 | 1.55E-08 |
| E2F6     | 2p25.1       | -0.30302 | 1.49E-09 | 1.56E-08 |
| NTHL1    | 16p13.3      | -0.30294 | 1.50E-09 | 1.57E-08 |
| CEMIP2   | 9q21.13      | 0.302886 | 1.51E-09 | 1.58E-08 |
| DUSP28   | 2q37.3       | -0.30279 | 1.53E-09 | 1.60E-08 |
| C16ORF72 | 16p13.2      | 0.302724 | 1.54E-09 | 1.61E-08 |
| KRBA2    | 17p13.1      | 0.302719 | 1.55E-09 | 1.61E-08 |
| RPSAP58  | 19p12        | -0.30266 | 1.56E-09 | 1.62E-08 |
| ATRX     | Xq21.1       | 0.302659 | 1.56E-09 | 1.62E-08 |
| SLC5A6   | 2p23.3       | -0.30266 | 1.56E-09 | 1.62E-08 |
| BLOC1S1  | 12q13.2      | -0.30261 | 1.57E-09 | 1.63E-08 |
| ENY2     | 8q23.1       | -0.30249 | 1.59E-09 | 1.66E-08 |
| MTRF1    | 13q14.11     | -0.30249 | 1.59E-09 | 1.66E-08 |
| CD81     | 11p15.5      | -0.30249 | 1.59E-09 | 1.66E-08 |
| CASD1    | 7q21.3       | 0.302463 | 1.60E-09 | 1.66E-08 |
| VEZF1    | 17q22        | 0.302456 | 1.60E-09 | 1.66E-08 |
| TRIO     | 5p15.2       | 0.302368 | 1.62E-09 | 1.68E-08 |
| RPL18A   | 19p13.11     | -0.30227 | 1.64E-09 | 1.70E-08 |
| MRNIP    | 5q35.3       | -0.30222 | 1.65E-09 | 1.71E-08 |
| KLF12    | 13q22.1      | 0.302203 | 1.65E-09 | 1.71E-08 |
| USP39    | 2p11.2       | -0.30218 | 1.66E-09 | 1.72E-08 |
| LUC7L    | 16p13.3      | -0.30217 | 1.66E-09 | 1.72E-08 |
| CWF19L1  | 10q24.31     | -0.30208 | 1.68E-09 | 1.74E-08 |
| LRMP     | 12p12.1      | 0.302062 | 1.68E-09 | 1.74E-08 |
| CCDC22   | Xp11.23      | -0.30206 | 1.68E-09 | 1.74E-08 |
| MRPL27   | 17q21.33     | -0.30198 | 1.70E-09 | 1.76E-08 |
| MFSD1    | 3q25.32      | 0.301982 | 1.70E-09 | 1.76E-08 |
| PPARA    | 22q13.31     | 0.301963 | 1.71E-09 | 1.76E-08 |
| NR2C2    | 3p25.1       | 0.301796 | 1.74E-09 | 1.80E-08 |
| CREBL2   | 12p13.1      | 0.30172  | 1.76E-09 | 1.81E-08 |
| TOMM40   | 19q13.32     | -0.30168 | 1.77E-09 | 1.82E-08 |
| SETD6    | 16q21        | -0.30151 | 1.81E-09 | 1.86E-08 |
| NDUFV1   | 11q13.2      | -0.30146 | 1.82E-09 | 1.87E-08 |
| ZNF699   | 19p13.2      | 0.30143  | 1.83E-09 | 1.88E-08 |
| GVINP1   | 11p15.4      | 0.301418 | 1.83E-09 | 1.88E-08 |
| TGFBRAP1 | 2q12.1-q12.2 | 0.301414 | 1.83E-09 | 1.88E-08 |
| FRYL     | 4p11         | 0.30141  | 1.83E-09 | 1.88E-08 |
| FAM102B  | 1p13.3       | 0.301384 | 1.84E-09 | 1.89E-08 |
| PTAR1    | 9q21.12      | 0.301354 | 1.84E-09 | 1.89E-08 |
| NAV1     | 1q32.1       | 0.301316 | 1.85E-09 | 1.90E-08 |
| UBE2J1   | 6q15         | 0.301316 | 1.85E-09 | 1.90E-08 |
| DOCK10   | 2q36.2       | 0.301307 | 1.86E-09 | 1.90E-08 |
| TLR1     | 4p14         | 0.301299 | 1.86E-09 | 1.90E-08 |
| SLC38A3  | 3p21.31      | -0.30124 | 1.87E-09 | 1.92E-08 |
| CARD6    | 5p13.1       | 0.301185 | 1.89E-09 | 1.93E-08 |
| PSMC3IP  | 17q21.2      | -0.30115 | 1.89E-09 | 1.94E-08 |
| GALT     | 9p13.3       | -0.3011  | 1.91E-09 | 1.95E-08 |
| HERC3    | 4q22.1       | 0.301069 | 1.91E-09 | 1.95E-08 |
| RSF1     | 11q14.1      | 0.301064 | 1.92E-09 | 1.96E-08 |
| D2HGDH   | 2q37.3       | -0.30102 | 1.93E-09 | 1.97E-08 |
| SAMD8    | 10q22.2      | 0.300936 | 1.95E-09 | 1.99E-08 |
| FEM1C    | 5q22.3       | 0.300923 | 1.95E-09 | 1.99E-08 |
| FAM83G   | 17p11.2      | 0.300917 | 1.95E-09 | 1.99E-08 |
| RNF144A  | 2p25.1       | 0.300909 | 1.95E-09 | 1.99E-08 |
| MOB2     | 11p15.5      | -0.30088 | 1.96E-09 | 2.00E-08 |
| AIMP2    | 7p22.1       | -0.30079 | 1.98E-09 | 2.02E-08 |

|              |          |          |          |          |
|--------------|----------|----------|----------|----------|
| ACBD5        | 10p12.1  | 0.300756 | 1.99E-09 | 2.03E-08 |
| NPRL3        | 16p13.3  | -0.30068 | 2.01E-09 | 2.05E-08 |
| SETD7        | 4q31.1   | 0.300512 | 2.06E-09 | 2.09E-08 |
| SYNE2        | 14q23.2  | 0.300484 | 2.06E-09 | 2.09E-08 |
| RASAL2       | 1q25.2   | 0.30046  | 2.07E-09 | 2.10E-08 |
| LAMB1        | 7q31.1   | 0.300451 | 2.07E-09 | 2.10E-08 |
| VPS28        | 8q24.3   | -0.30035 | 2.10E-09 | 2.13E-08 |
| SESN3        | 11q21    | 0.300347 | 2.10E-09 | 2.13E-08 |
| ITGA1        | 5q11.2   | 0.300263 | 2.12E-09 | 2.15E-08 |
| MLF2         | 12p13.31 | -0.3002  | 2.14E-09 | 2.17E-08 |
| PRKCA        | 17q24.2  | 0.300163 | 2.15E-09 | 2.18E-08 |
| USP38        | 4q31.21  | 0.300096 | 2.17E-09 | 2.19E-08 |
| GNL1         | 6p21.33  | -0.30007 | 2.18E-09 | 2.20E-08 |
| ARID1A       | 1p36.11  | 0.300055 | 2.18E-09 | 2.20E-08 |
| POGZ         | 1q21.3   | 0.300002 | 2.20E-09 | 2.22E-08 |
| PRR14        | 16p11.2  | -0.29998 | 2.20E-09 | 2.22E-08 |
| AGAP3        | 7q36.1   | -0.29997 | 2.20E-09 | 2.22E-08 |
| CFAP126      | 1q23.3   | 0.299962 | 2.21E-09 | 2.22E-08 |
| TYSND1       | 10q22.1  | -0.29995 | 2.21E-09 | 2.23E-08 |
| TMEM120A     | 7q11.23  | -0.29995 | 2.21E-09 | 2.23E-08 |
| ERCC4        | 16p13.12 | 0.299929 | 2.22E-09 | 2.23E-08 |
| ZNF562       | 19p13.2  | 0.299738 | 2.27E-09 | 2.28E-08 |
| ZBTB8A       | 1p35.1   | 0.299695 | 2.28E-09 | 2.30E-08 |
| SRGAP1       | 12q14.2  | 0.299661 | 2.29E-09 | 2.31E-08 |
| ATXN1        | 6p22.3   | 0.299628 | 2.30E-09 | 2.31E-08 |
| ENTPD3       | 3p22.1   | 0.2996   | 2.31E-09 | 2.32E-08 |
| ARHGAP39     | 8q24.3   | -0.2995  | 2.34E-09 | 2.35E-08 |
| SLC2A4RG     | 20q13.33 | -0.29948 | 2.35E-09 | 2.35E-08 |
| NCLN         | 19p13.3  | -0.29944 | 2.36E-09 | 2.36E-08 |
| TNFRSF12A    | 16p13.3  | -0.29936 | 2.38E-09 | 2.39E-08 |
| DDX12P       | 12p13.31 | -0.29921 | 2.43E-09 | 2.43E-08 |
| KMT2D        | 12q13.12 | 0.299174 | 2.44E-09 | 2.44E-08 |
| MST1P2       | 1p36.13  | -0.29916 | 2.45E-09 | 2.45E-08 |
| RDM1         | 17q12    | -0.29913 | 2.46E-09 | 2.46E-08 |
| ANKRD13C     | 1p31.1   | 0.299117 | 2.46E-09 | 2.46E-08 |
| PRKACB       | 1p31.1   | 0.299022 | 2.49E-09 | 2.49E-08 |
| WDFY1        | 2q36.1   | 0.298978 | 2.50E-09 | 2.50E-08 |
| DST          | 6p12.1   | 0.298942 | 2.52E-09 | 2.51E-08 |
| AFMID        | 17q25.3  | -0.29893 | 2.52E-09 | 2.51E-08 |
| KIF13A       | 6p22.3   | 0.298891 | 2.53E-09 | 2.52E-08 |
| RPS27A       | 2p16.1   | -0.29887 | 2.54E-09 | 2.53E-08 |
| GPATCH3      | 1p36.11  | -0.29881 | 2.56E-09 | 2.55E-08 |
| ARHGAP12     | 10p11.22 | 0.298803 | 2.56E-09 | 2.55E-08 |
| TIPARP       | 3q25.31  | 0.298616 | 2.62E-09 | 2.61E-08 |
| MAML1        | 5q35.3   | 0.29861  | 2.62E-09 | 2.61E-08 |
| RRP7BP       | 22q13.2  | -0.2986  | 2.63E-09 | 2.61E-08 |
| FAM192A      | 16q13    | -0.29859 | 2.63E-09 | 2.61E-08 |
| IQGAP2       | 5q13.3   | 0.298541 | 2.65E-09 | 2.63E-08 |
| SNRPB        | 20p13    | -0.29854 | 2.65E-09 | 2.63E-08 |
| ZNF45        | 19q13.31 | 0.298462 | 2.67E-09 | 2.65E-08 |
| NUCKS1       | 1q32.1   | 0.298459 | 2.68E-09 | 2.65E-08 |
| DIS3L        | 15q22.31 | 0.298362 | 2.71E-09 | 2.68E-08 |
| HSD11B1L     | 19p13.3  | -0.29833 | 2.72E-09 | 2.69E-08 |
| C7ORF26      | 7p22.1   | -0.29831 | 2.73E-09 | 2.70E-08 |
| ADAM28       | 8p21.2   | 0.298216 | 2.76E-09 | 2.73E-08 |
| RNASE4       | 14q11.2  | 0.298215 | 2.76E-09 | 2.73E-08 |
| PRR5-ARHGAP8 | 22q13.31 | -0.29821 | 2.76E-09 | 2.73E-08 |
| HDAC8        | Xq13.1   | -0.29821 | 2.76E-09 | 2.73E-08 |

|          |               |          |          |          |
|----------|---------------|----------|----------|----------|
| GMFB     | 14q22.2       | 0.298188 | 2.77E-09 | 2.73E-08 |
| HES6     | 2q37.3        | -0.29815 | 2.78E-09 | 2.75E-08 |
| ROCK2    | 2p25.1        | 0.298127 | 2.79E-09 | 2.75E-08 |
| GFER     | 16p13.3       | -0.29796 | 2.85E-09 | 2.81E-08 |
| SPATA25  | 20q13.12      | -0.29793 | 2.86E-09 | 2.82E-08 |
| SULT2A1  | 19q13.33      | -0.2979  | 2.87E-09 | 2.83E-08 |
| KTN1     | 14q22.3       | 0.297829 | 2.90E-09 | 2.85E-08 |
| SPNS1    | 16p11.2       | -0.29781 | 2.91E-09 | 2.86E-08 |
| ZNF397   | 18q12.2       | 0.297782 | 2.92E-09 | 2.87E-08 |
| UBR2     | 6p21.1        | 0.297766 | 2.92E-09 | 2.87E-08 |
| POGK     | 1q24.1        | 0.297742 | 2.93E-09 | 2.88E-08 |
| RASSF7   | 11p15.5       | -0.29772 | 2.94E-09 | 2.89E-08 |
| HNF1A    | 12q24.31      | -0.29769 | 2.95E-09 | 2.90E-08 |
| PRXL2B   | 1p36.32       | -0.2976  | 2.99E-09 | 2.93E-08 |
| RNF8     | 6p21.2        | -0.29755 | 3.00E-09 | 2.94E-08 |
| KMT2E    | 7q22.3        | 0.297528 | 3.01E-09 | 2.95E-08 |
| DAZAP1   | 19p13.3       | -0.29741 | 3.06E-09 | 3.00E-08 |
| THRAP3   | 1p34.3        | 0.297385 | 3.07E-09 | 3.00E-08 |
| SNF8     | 17q21.32      | -0.29738 | 3.07E-09 | 3.00E-08 |
| NNT      | 5p12          | 0.297382 | 3.07E-09 | 3.00E-08 |
| RNF166   | 16q24.2-q24.3 | -0.29737 | 3.07E-09 | 3.00E-08 |
| PDZD11   | Xq13.1        | -0.29736 | 3.08E-09 | 3.01E-08 |
| FLII     | 17p11.2       | 0.297334 | 3.09E-09 | 3.02E-08 |
| PRMT1    | 19q13.33      | -0.29726 | 3.12E-09 | 3.05E-08 |
| ACYP1    | 14q24.3       | -0.29724 | 3.12E-09 | 3.05E-08 |
| MSH5     | 6p21.33       | -0.29716 | 3.16E-09 | 3.08E-08 |
| PREX2    | 8q13.2        | 0.297156 | 3.16E-09 | 3.08E-08 |
| ANAPC7   | 12q24.11      | -0.2971  | 3.18E-09 | 3.10E-08 |
| EPOP     | 17q12         | -0.29708 | 3.19E-09 | 3.10E-08 |
| GCSAML   | 1q44          | 0.297065 | 3.19E-09 | 3.11E-08 |
| NR3C2    | 4q31.23       | 0.297061 | 3.20E-09 | 3.11E-08 |
| GOLGA5   | 14q32.12      | 0.29706  | 3.20E-09 | 3.11E-08 |
| SMARCA2  | 9p24.3        | 0.297026 | 3.21E-09 | 3.12E-08 |
| PCNX1    | 14q24.2       | 0.297016 | 3.21E-09 | 3.12E-08 |
| RPL7A    | 9q34.2        | -0.29699 | 3.23E-09 | 3.13E-08 |
| POLDIP2  | 17q11.2       | -0.29698 | 3.23E-09 | 3.13E-08 |
| FOSL2    | 2p23.2        | 0.296976 | 3.23E-09 | 3.14E-08 |
| PCDHGA9  | 5q31.3        | 0.296918 | 3.26E-09 | 3.16E-08 |
| DPY30    | 2p22.3        | -0.29689 | 3.27E-09 | 3.17E-08 |
| CDC37    | 19p13.2       | -0.29687 | 3.27E-09 | 3.17E-08 |
| C9ORF43  | 9q32          | -0.29682 | 3.30E-09 | 3.19E-08 |
| MTHFD2L  | 4q13.3        | -0.29675 | 3.32E-09 | 3.22E-08 |
| MALT1    | 18q21.32      | 0.296728 | 3.33E-09 | 3.23E-08 |
| TMEM263  | 12q23.3       | 0.296711 | 3.34E-09 | 3.23E-08 |
| CENPW    | 6q22.32       | -0.29667 | 3.36E-09 | 3.25E-08 |
| TMEM179B | 11q12.3       | -0.29663 | 3.38E-09 | 3.26E-08 |
| MRPS28   | 8q21.13       | -0.29655 | 3.41E-09 | 3.29E-08 |
| PBX4     | 19p13.11      | -0.29652 | 3.42E-09 | 3.30E-08 |
| MRPL10   | 17q21.32      | -0.29647 | 3.45E-09 | 3.32E-08 |
| NRBP2    | 8q24.3        | -0.29637 | 3.49E-09 | 3.37E-08 |
| KCNA3    | 1p13.3        | 0.296358 | 3.49E-09 | 3.37E-08 |
| RPS18    | 6p21.32       | -0.2963  | 3.52E-09 | 3.39E-08 |
| WASH3P   | 15q26.3       | -0.29626 | 3.54E-09 | 3.41E-08 |
| FAM24B   | 10q26.13      | -0.29613 | 3.60E-09 | 3.46E-08 |
| IP6K2    | 3p21.31       | -0.29613 | 3.60E-09 | 3.46E-08 |
| WDR34    | 9q34.11       | -0.29602 | 3.65E-09 | 3.51E-08 |
| SCML1    | Xp22.13       | -0.29598 | 3.66E-09 | 3.52E-08 |
| EVI5     | 1p22.1        | 0.295957 | 3.68E-09 | 3.53E-08 |

|          |          |          |          |          |
|----------|----------|----------|----------|----------|
| MYL5     | 4p16.3   | -0.29593 | 3.69E-09 | 3.54E-08 |
| COA5     | 2q11.2   | -0.29572 | 3.79E-09 | 3.64E-08 |
| C12ORF49 | 12q24.22 | 0.295688 | 3.80E-09 | 3.65E-08 |
| ZNF205   | 16p13.3  | -0.29561 | 3.84E-09 | 3.69E-08 |
| IFNAR1   | 21q22.11 | 0.295372 | 3.96E-09 | 3.79E-08 |
| CHRM4    | 11p11.2  | 0.295235 | 4.03E-09 | 3.86E-08 |
| SPDYA    | 2p23.2   | -0.29522 | 4.03E-09 | 3.86E-08 |
| MCRIP1   | 17q25.3  | -0.29519 | 4.05E-09 | 3.88E-08 |
| TUBA4A   | 2q35     | -0.29517 | 4.06E-09 | 3.89E-08 |
| PEBP1    | 12q24.23 | -0.29515 | 4.07E-09 | 3.89E-08 |
| PTEN     | 10q23.31 | 0.295084 | 4.11E-09 | 3.92E-08 |
| MORF4    | 4q34.1   | 0.295017 | 4.14E-09 | 3.95E-08 |
| DPH2     | 1p34.1   | -0.29499 | 4.16E-09 | 3.97E-08 |
| RPSA     | 3p22.1   | -0.2949  | 4.20E-09 | 4.01E-08 |
| SLC25A28 | 10q24.2  | -0.29482 | 4.24E-09 | 4.04E-08 |
| MCAT     | 22q13.2  | -0.2947  | 4.31E-09 | 4.11E-08 |
| WASHC2A  | 10q11.23 | 0.294659 | 4.33E-09 | 4.13E-08 |
| SMIM14   | 4p14     | 0.29444  | 4.45E-09 | 4.24E-08 |
| PRKAR1B  | 7p22.3   | -0.29439 | 4.48E-09 | 4.26E-08 |
| SPRED2   | 2p14     | 0.294355 | 4.50E-09 | 4.28E-08 |
| WDR59    | 16q23.1  | -0.29435 | 4.50E-09 | 4.28E-08 |
| ACTR3C   | 7q36.1   | -0.2943  | 4.53E-09 | 4.30E-08 |
| CENPC    | 4q13.2   | 0.294296 | 4.53E-09 | 4.31E-08 |
| STARD10  | 11q13.4  | -0.2942  | 4.59E-09 | 4.36E-08 |
| WIPI2    | 7p22.1   | -0.29411 | 4.64E-09 | 4.40E-08 |
| EDIL3    | 5q14.3   | 0.29407  | 4.66E-09 | 4.42E-08 |
| LSMEM1   | 7q31.1   | -0.29403 | 4.69E-09 | 4.44E-08 |
| RSBN1    | 1p13.2   | 0.293977 | 4.72E-09 | 4.47E-08 |
| CHCHD5   | 2q14.1   | -0.29386 | 4.79E-09 | 4.53E-08 |
| GCSAM    | 3q13.2   | 0.293829 | 4.81E-09 | 4.55E-08 |
| QRICH1   | 3p21.31  | 0.293816 | 4.81E-09 | 4.56E-08 |
| SSH1     | 12q24.11 | 0.293786 | 4.83E-09 | 4.57E-08 |
| RNMT     | 18p11.21 | 0.29351  | 5.00E-09 | 4.73E-08 |
| RBBP8NL  | 20q13.33 | -0.29345 | 5.04E-09 | 4.76E-08 |
| ZC3H7A   | 16p13.13 | 0.293448 | 5.04E-09 | 4.76E-08 |
| ZNHIT3   | 17q12    | -0.2934  | 5.07E-09 | 4.79E-08 |
| CAMTA2   | 17p13.2  | 0.293364 | 5.10E-09 | 4.81E-08 |
| FYB1     | 5p13.1   | 0.293227 | 5.18E-09 | 4.89E-08 |
| RAB3B    | 1p32.3   | 0.293215 | 5.19E-09 | 4.89E-08 |
| TRAF6    | 11p12    | 0.293192 | 5.21E-09 | 4.91E-08 |
| MST1     | 3p21.31  | -0.29311 | 5.26E-09 | 4.95E-08 |
| STYXL1   | 7q11.23  | -0.29309 | 5.27E-09 | 4.97E-08 |
| FOXRED1  | 11q24.2  | -0.29299 | 5.34E-09 | 5.03E-08 |
| CERS6    | 2q24.3   | 0.292893 | 5.40E-09 | 5.08E-08 |
| PLA2G6   | 22q13.1  | -0.29285 | 5.44E-09 | 5.11E-08 |
| ZDHHC20  | 13q12.11 | 0.292805 | 5.46E-09 | 5.14E-08 |
| SMPD4    | 2q21.1   | -0.29279 | 5.48E-09 | 5.14E-08 |
| TOMM22   | 22q13.1  | -0.29267 | 5.56E-09 | 5.22E-08 |
| ATP5MC2  | 12q13.13 | -0.29262 | 5.59E-09 | 5.25E-08 |
| MINK1    | 17p13.2  | 0.292566 | 5.63E-09 | 5.28E-08 |
| TMEM126B | 11q14.1  | -0.29256 | 5.63E-09 | 5.28E-08 |
| UROD     | 1p34.1   | -0.29254 | 5.65E-09 | 5.29E-08 |
| GON4L    | 1q22     | 0.292509 | 5.67E-09 | 5.31E-08 |
| ADNP2    | 18q23    | 0.292464 | 5.70E-09 | 5.34E-08 |
| ACER3    | 11q13.5  | 0.292455 | 5.71E-09 | 5.34E-08 |
| TMEM255A | Xq24     | 0.29245  | 5.71E-09 | 5.34E-08 |
| SYNE1    | 6q25.2   | 0.292418 | 5.73E-09 | 5.36E-08 |
| PAFAH1B2 | 11q23.3  | 0.292391 | 5.75E-09 | 5.38E-08 |



|             |              |          |          |          |
|-------------|--------------|----------|----------|----------|
| RBM10       | Xp11.3       | -0.29235 | 5.78E-09 | 5.40E-08 |
| LRRC14      | 8q24.3       | -0.29231 | 5.81E-09 | 5.42E-08 |
| ZNF358      | 19p13.2      | -0.2923  | 5.82E-09 | 5.43E-08 |
| MPST        | 22q12.3      | -0.29227 | 5.84E-09 | 5.45E-08 |
| GPATCH8     | 17q21.31     | 0.292167 | 5.92E-09 | 5.52E-08 |
| ARRDC3      | 5q14.3       | 0.292152 | 5.93E-09 | 5.52E-08 |
| MRPS9       | 2q12.1       | -0.2921  | 5.97E-09 | 5.56E-08 |
| ARRDC1-AS1  | 9q34.3       | -0.29203 | 6.02E-09 | 5.60E-08 |
| CIC         | 19q13.2      | 0.291993 | 6.05E-09 | 5.63E-08 |
| CNPY2       | 12q13.3      | -0.29188 | 6.13E-09 | 5.70E-08 |
| WDR13       | Xp11.23      | -0.29186 | 6.15E-09 | 5.71E-08 |
| TGFBR2      | 3p24.1       | 0.29184  | 6.16E-09 | 5.73E-08 |
| POF1B       | Xq21.1       | 0.291836 | 6.17E-09 | 5.73E-08 |
| RGPD3       | 2q12.2       | 0.29182  | 6.18E-09 | 5.74E-08 |
| ATXN7L2     | 1p13.3       | -0.29181 | 6.18E-09 | 5.74E-08 |
| RFX3        | 9p24.2       | 0.291765 | 6.22E-09 | 5.77E-08 |
| TMEM181     | 6q25.3       | 0.291748 | 6.23E-09 | 5.78E-08 |
| NME6        | 3p21.31      | -0.29172 | 6.26E-09 | 5.80E-08 |
| HPGDS       | 4q22.3       | 0.29166  | 6.30E-09 | 5.84E-08 |
| PUM1        | 1p35.2       | 0.291635 | 6.32E-09 | 5.85E-08 |
| ZNF252P-AS1 | 8q24.3       | -0.29163 | 6.32E-09 | 5.85E-08 |
| TTC32       | 2p24.1       | -0.29161 | 6.34E-09 | 5.86E-08 |
| ATP9B       | 18q23        | 0.291605 | 6.35E-09 | 5.87E-08 |
| SUGP1       | 19p13.11     | -0.2916  | 6.35E-09 | 5.87E-08 |
| PMPCB       | 7q22.1       | -0.29157 | 6.37E-09 | 5.88E-08 |
| OLA1        | 2q31.1       | -0.29151 | 6.42E-09 | 5.93E-08 |
| ANKRD23     | 2q11.2       | -0.29148 | 6.45E-09 | 5.95E-08 |
| FAM173A     | 16p13.3      | -0.29139 | 6.52E-09 | 6.01E-08 |
| INPP5J      | 22q12.2      | -0.29137 | 6.53E-09 | 6.02E-08 |
| GAPT        | 5q11.2       | 0.291363 | 6.54E-09 | 6.03E-08 |
| RPL37       | 5p13.1       | -0.29127 | 6.61E-09 | 6.09E-08 |
| ITGB7       | 12q13.13     | 0.291259 | 6.62E-09 | 6.10E-08 |
| SS18        | 18q11.2      | 0.291166 | 6.70E-09 | 6.17E-08 |
| NT5E        | 6q14.3       | 0.291127 | 6.73E-09 | 6.20E-08 |
| RCAN2       | 6p12.3       | 0.291056 | 6.79E-09 | 6.25E-08 |
| FAM20B      | 1q25.2       | 0.291051 | 6.80E-09 | 6.25E-08 |
| ZNF624      | 17p11.2      | 0.291025 | 6.82E-09 | 6.26E-08 |
| ITGA8       | 10p13        | 0.290933 | 6.90E-09 | 6.33E-08 |
| IQSEC1      | 3p25.2-p25.1 | 0.290933 | 6.90E-09 | 6.33E-08 |
| ZDHHC7      | 16q24.1      | 0.29091  | 6.92E-09 | 6.35E-08 |
| BEND3P3     | 10q22.3      | 0.290899 | 6.93E-09 | 6.35E-08 |
| C1ORF35     | 1q42.13      | -0.29088 | 6.95E-09 | 6.37E-08 |
| DHX35       | 20q11.23-q12 | -0.29086 | 6.96E-09 | 6.38E-08 |
| LMAN1       | 18q21.32     | 0.290848 | 6.97E-09 | 6.38E-08 |
| UPK3BL1     | 7q22.1       | -0.2908  | 7.01E-09 | 6.42E-08 |
| WDR20       | 14q32.31     | 0.290772 | 7.04E-09 | 6.44E-08 |
| FAM177A1    | 14q13.2      | 0.290662 | 7.13E-09 | 6.52E-08 |
| COX14       | 12q13.12     | -0.29052 | 7.26E-09 | 6.63E-08 |
| LINS1       | 15q26.3      | 0.290506 | 7.27E-09 | 6.64E-08 |
| YME1L1      | 10p12.1      | 0.290497 | 7.28E-09 | 6.65E-08 |
| USO1        | 4q21.1       | 0.290483 | 7.29E-09 | 6.66E-08 |
| CYB5B       | 16q22.1      | -0.29042 | 7.35E-09 | 6.71E-08 |
| PDE5A       | 4q26         | 0.290395 | 7.37E-09 | 6.72E-08 |
| MMP24       | 20q11.22     | -0.29038 | 7.38E-09 | 6.73E-08 |
| FAM107B     | 10p13        | 0.290347 | 7.42E-09 | 6.76E-08 |
| PIGN        | 18q21.33     | 0.290278 | 7.48E-09 | 6.81E-08 |
| MIA2        | 14q13.2      | 0.290234 | 7.52E-09 | 6.85E-08 |
| MGLL        | 3q21.3       | 0.290129 | 7.62E-09 | 6.93E-08 |

|            |               |          |          |          |
|------------|---------------|----------|----------|----------|
| PSMD3      | 17q21.1       | -0.28987 | 7.87E-09 | 7.16E-08 |
| RIC1       | 9p24.1        | 0.289801 | 7.94E-09 | 7.21E-08 |
| AKR1C8P    | 10p15.1       | -0.28978 | 7.95E-09 | 7.23E-08 |
| PIGB       | 15q21.3       | 0.289739 | 8.00E-09 | 7.26E-08 |
| ICE2       | 15q22.2       | 0.289725 | 8.01E-09 | 7.27E-08 |
| MEIS2      | 15q14         | 0.28968  | 8.05E-09 | 7.31E-08 |
| N4BP1      | 16q12.1       | 0.289606 | 8.13E-09 | 7.37E-08 |
| SPDYC      | 11q13.1       | -0.28959 | 8.15E-09 | 7.39E-08 |
| CHMP4B     | 20q11.22      | -0.28955 | 8.19E-09 | 7.42E-08 |
| CGN        | 1q21.3        | 0.289477 | 8.26E-09 | 7.48E-08 |
| MCM7       | 7q22.1        | -0.28947 | 8.26E-09 | 7.48E-08 |
| WWTR1      | 3q25.1        | 0.289402 | 8.34E-09 | 7.54E-08 |
| SAP18      | 13q12.11      | -0.28938 | 8.36E-09 | 7.56E-08 |
| C19ORF48   | 19q13.33      | -0.28931 | 8.43E-09 | 7.62E-08 |
| RNF125     | 18q12.1       | 0.289236 | 8.51E-09 | 7.69E-08 |
| ARHGAP20   | 11q22.3-q23.1 | 0.289221 | 8.52E-09 | 7.70E-08 |
| LINC00265  | 7p14.1        | -0.28919 | 8.56E-09 | 7.73E-08 |
| TMEM259    | 19p13.3       | -0.28918 | 8.56E-09 | 7.73E-08 |
| ATP2B1     | 12q21.33      | 0.289175 | 8.57E-09 | 7.73E-08 |
| DUSP23     | 1q23.2        | -0.28915 | 8.59E-09 | 7.75E-08 |
| SMAD4      | 18q21.2       | 0.289091 | 8.66E-09 | 7.81E-08 |
| TUBA1C     | 12q13.12      | -0.28908 | 8.68E-09 | 7.82E-08 |
| SMIM26     | 20p11.23      | -0.28907 | 8.69E-09 | 7.82E-08 |
| CSGALNACT2 | 10q11.21      | 0.28905  | 8.70E-09 | 7.84E-08 |
| FAM177B    | 1q41          | 0.288973 | 8.79E-09 | 7.91E-08 |
| DMAP1      | 1p34.1        | -0.28895 | 8.82E-09 | 7.93E-08 |
| MOSPD3     | 7q22.1        | -0.28894 | 8.82E-09 | 7.93E-08 |
| ATP6V1A    | 3q13.31       | 0.288937 | 8.83E-09 | 7.93E-08 |
| TMEM249    | 8q24.3        | -0.28892 | 8.84E-09 | 7.94E-08 |
| SIGLEC6    | 19q13.41      | 0.288848 | 8.92E-09 | 8.01E-08 |
| DIXDC1     | 11q23.1       | 0.288815 | 8.96E-09 | 8.04E-08 |
| SCN9A      | 2q24.3        | 0.288671 | 9.12E-09 | 8.18E-08 |
| RPSAP9     | 9q21.13       | -0.28862 | 9.18E-09 | 8.23E-08 |
| SNTA1      | 20q11.21      | -0.28856 | 9.24E-09 | 8.28E-08 |
| TRIM33     | 1p13.2        | 0.288403 | 9.43E-09 | 8.44E-08 |
| KCNMA1     | 10q22.3       | 0.288363 | 9.47E-09 | 8.48E-08 |
| LOC285074  | 2p11.2        | -0.28835 | 9.49E-09 | 8.49E-08 |
| LINC00115  | 1p36.33       | -0.28826 | 9.60E-09 | 8.58E-08 |
| LDLRAD4    | 18p11.21      | 0.288229 | 9.63E-09 | 8.61E-08 |
| TOP2B      | 3p24.2        | 0.288188 | 9.68E-09 | 8.65E-08 |
| SLC30A2    | 1p36.11       | -0.28815 | 9.72E-09 | 8.68E-08 |
| TAF1L      | 9p21.1        | 0.2881   | 9.78E-09 | 8.74E-08 |
| DPM3       | 1q22          | -0.28809 | 9.80E-09 | 8.74E-08 |
| AR         | Xq12          | 0.288035 | 9.86E-09 | 8.80E-08 |
| KIAA1211   | 4q12          | 0.288028 | 9.87E-09 | 8.80E-08 |
| RABEP1     | 17p13.2       | 0.28799  | 9.92E-09 | 8.84E-08 |
| SLC35A5    | 3q13.2        | 0.287958 | 9.96E-09 | 8.87E-08 |
| PPP3CA     | 4q24          | 0.287795 | 1.02E-08 | 9.04E-08 |
| WDR5       | 9q34.2        | -0.28778 | 1.02E-08 | 9.06E-08 |
| C8ORF44    | 8q13.1        | -0.28775 | 1.02E-08 | 9.09E-08 |
| GALNT7     | 4q34.1        | 0.287733 | 1.02E-08 | 9.10E-08 |
| RSC1A1     | 1p36.21       | 0.287685 | 1.03E-08 | 9.15E-08 |
| IPO8       | 12p11.21      | 0.287628 | 1.04E-08 | 9.21E-08 |
| MTUS1      | 8p22          | 0.287542 | 1.05E-08 | 9.30E-08 |
| ARHGAP11B  | 15q13.2       | 0.287537 | 1.05E-08 | 9.30E-08 |
| FERMT3     | 11q13.1       | 0.287484 | 1.06E-08 | 9.36E-08 |
| MIGA2      | 9q34.11       | -0.28746 | 1.06E-08 | 9.39E-08 |
| ZNF263     | 16p13.3       | -0.28741 | 1.07E-08 | 9.44E-08 |

|           |                     |          |          |          |
|-----------|---------------------|----------|----------|----------|
| TNFSF13   | 17p13.1             | 0.287375 | 1.07E-08 | 9.48E-08 |
| RUFY2     | 10q21.3             | 0.287327 | 1.08E-08 | 9.53E-08 |
| MRPL51    | 12p13.31            | -0.28729 | 1.08E-08 | 9.56E-08 |
| ITPA      | 20p13               | -0.28728 | 1.08E-08 | 9.58E-08 |
| PSMB10    | 16q22.1             | -0.2872  | 1.09E-08 | 9.66E-08 |
| AGL       | 1p21.2              | 0.287191 | 1.09E-08 | 9.67E-08 |
| PMS2P3    | 7q11.23             | -0.28718 | 1.10E-08 | 9.68E-08 |
| RAB5B     | 12q13.2             | 0.287153 | 1.10E-08 | 9.70E-08 |
| GTPBP6    | Xp22.33 and Yp11.31 | -0.2871  | 1.11E-08 | 9.76E-08 |
| MED10     | 5p15.31             | -0.28706 | 1.11E-08 | 9.80E-08 |
| FAM104B   | Xp11.21             | -0.28702 | 1.12E-08 | 9.85E-08 |
| ITPKB     | 1q42.12             | 0.286925 | 1.13E-08 | 9.96E-08 |
| SMAD3     | 15q22.33            | 0.286848 | 1.14E-08 | 1.01E-07 |
| AP3B1     | 5q14.1              | 0.286827 | 1.14E-08 | 1.01E-07 |
| ANKRD16   | 10p15.1             | -0.28681 | 1.15E-08 | 1.01E-07 |
| ANXA2P2   | 9p13.3              | 0.286809 | 1.15E-08 | 1.01E-07 |
| MROH1     | 8q24.3              | -0.2868  | 1.15E-08 | 1.01E-07 |
| IGF2R     | 6q25.3              | 0.286761 | 1.15E-08 | 1.01E-07 |
| PLS1      | 3q23                | 0.286757 | 1.15E-08 | 1.01E-07 |
| C8ORF82   | 8q24.3              | -0.28675 | 1.15E-08 | 1.01E-07 |
| TROAP     | 12q13.12            | -0.28669 | 1.16E-08 | 1.02E-07 |
| MYO5A     | 15q21.2             | 0.286624 | 1.17E-08 | 1.03E-07 |
| MNX1      | 7q36.3              | -0.2865  | 1.19E-08 | 1.04E-07 |
| CR1       | 1q32.2              | 0.286468 | 1.19E-08 | 1.05E-07 |
| UBTD2     | 5q35.1              | 0.286436 | 1.20E-08 | 1.05E-07 |
| UEVLD     | 11p15.1             | 0.286374 | 1.21E-08 | 1.06E-07 |
| CEP131    | 17q25.3             | -0.28632 | 1.22E-08 | 1.07E-07 |
| DDX51     | 12q24.33            | -0.28628 | 1.22E-08 | 1.07E-07 |
| SNORA72   | 8q22.2              | -0.28624 | 1.23E-08 | 1.07E-07 |
| WDR53     | 3q29                | -0.28622 | 1.23E-08 | 1.08E-07 |
| OGG1      | 3p25.3              | -0.28599 | 1.27E-08 | 1.11E-07 |
| CDK2AP2   | 11q13.2             | -0.28586 | 1.29E-08 | 1.12E-07 |
| GNA11     | 19p13.3             | 0.285831 | 1.29E-08 | 1.13E-07 |
| RUNX1T1   | 8q21.3              | 0.285817 | 1.29E-08 | 1.13E-07 |
| RBM19     | 12q24.13-q24.21     | -0.28581 | 1.29E-08 | 1.13E-07 |
| NPAT      | 11q22.3             | 0.285739 | 1.31E-08 | 1.14E-07 |
| MDFIC     | 7q31.1-q31.2        | 0.285708 | 1.31E-08 | 1.14E-07 |
| ITPRID2   | 2q31.3              | 0.285671 | 1.32E-08 | 1.15E-07 |
| XYLT1     | 16p12.3             | 0.285638 | 1.32E-08 | 1.15E-07 |
| PLXDC2    | 10p12.31            | 0.285625 | 1.32E-08 | 1.15E-07 |
| USP32     | 17q23.1-q23.2       | 0.2856   | 1.33E-08 | 1.16E-07 |
| MBNL1-AS1 | 3q25.1              | 0.285596 | 1.33E-08 | 1.16E-07 |
| CFL1      | 11q13.1             | -0.28559 | 1.33E-08 | 1.16E-07 |
| TIAM1     | 21q22.11            | 0.285527 | 1.34E-08 | 1.16E-07 |
| UBE2S     | 19q13.42            | -0.28552 | 1.34E-08 | 1.16E-07 |
| TAF5L     | 1q42.13             | 0.285435 | 1.35E-08 | 1.18E-07 |
| CCDC24    | 1p34.1              | -0.2854  | 1.36E-08 | 1.18E-07 |
| CDV3      | 3q22.1              | 0.285392 | 1.36E-08 | 1.18E-07 |
| SLC25A44  | 1q22                | 0.285316 | 1.37E-08 | 1.19E-07 |
| SH3RF1    | 4q32.3-q33          | 0.285312 | 1.37E-08 | 1.19E-07 |
| MOB1A     | 2p13.1              | 0.285303 | 1.38E-08 | 1.19E-07 |
| SRSF6     | 20q13.11            | -0.28528 | 1.38E-08 | 1.20E-07 |
| ACAD9     | 3q21.3              | -0.28527 | 1.38E-08 | 1.20E-07 |
| POLK      | 5q13.3              | 0.285265 | 1.38E-08 | 1.20E-07 |
| GLS2      | 12q13.3             | -0.28526 | 1.38E-08 | 1.20E-07 |
| TCF7L2    | 10q25.2-q25.3       | 0.285245 | 1.39E-08 | 1.20E-07 |
| VAC14     | 16q22.1-q22.2       | -0.28517 | 1.40E-08 | 1.21E-07 |
| KLHDC3    | 6p21.1              | -0.28517 | 1.40E-08 | 1.21E-07 |

|            |          |          |          |          |
|------------|----------|----------|----------|----------|
| GLG1       | 16q23.1  | 0.285155 | 1.40E-08 | 1.21E-07 |
| BNIP3L     | 8p21.2   | 0.285075 | 1.41E-08 | 1.22E-07 |
| ANO1       | 11q13.3  | 0.285031 | 1.42E-08 | 1.23E-07 |
| PTTG1      | 5q33.3   | -0.285   | 1.43E-08 | 1.23E-07 |
| FAM13B     | 5q31.2   | 0.284981 | 1.43E-08 | 1.23E-07 |
| YAE1       | 7p14.1   | -0.28497 | 1.43E-08 | 1.23E-07 |
| RUNX1      | 21q22.12 | 0.28496  | 1.43E-08 | 1.24E-07 |
| SRP54      | 14q13.2  | 0.284925 | 1.44E-08 | 1.24E-07 |
| TMTC3      | 12q21.32 | 0.284895 | 1.45E-08 | 1.24E-07 |
| LSP1P4     | 2p11.2   | -0.28486 | 1.45E-08 | 1.25E-07 |
| DDR2       | 1q23.3   | 0.284798 | 1.46E-08 | 1.26E-07 |
| NDUFB6     | 9p21.1   | -0.28473 | 1.48E-08 | 1.27E-07 |
| CYP2D6     | 22q13.2  | -0.28469 | 1.48E-08 | 1.27E-07 |
| ITGA4      | 2q31.3   | 0.284674 | 1.49E-08 | 1.28E-07 |
| RHBDL2     | 1p34.3   | 0.284665 | 1.49E-08 | 1.28E-07 |
| HMOX2      | 16p13.3  | -0.28466 | 1.49E-08 | 1.28E-07 |
| DNLZ       | 9q34.3   | -0.28464 | 1.49E-08 | 1.28E-07 |
| ACOT7      | 1p36.31  | -0.28461 | 1.50E-08 | 1.28E-07 |
| HECTD2     | 10q23.32 | 0.284608 | 1.50E-08 | 1.28E-07 |
| RALGPS2    | 1q25.2   | 0.284586 | 1.50E-08 | 1.29E-07 |
| TMEM60     | 7q11.23  | -0.28456 | 1.51E-08 | 1.29E-07 |
| R3HDM4     | 19p13.3  | -0.28442 | 1.53E-08 | 1.31E-07 |
| DSP        | 6p24.3   | 0.284326 | 1.55E-08 | 1.33E-07 |
| ZNF90      | 19p12    | -0.2843  | 1.55E-08 | 1.33E-07 |
| TEAD1      | 11p15.3  | 0.284283 | 1.56E-08 | 1.33E-07 |
| CCDC6      | 10q21.2  | 0.284184 | 1.58E-08 | 1.35E-07 |
| WDR45      | Xp11.23  | -0.28408 | 1.60E-08 | 1.36E-07 |
| PRSS3      | 9p13.3   | -0.28405 | 1.60E-08 | 1.37E-07 |
| SLITRK6    | 13q31.1  | 0.284017 | 1.61E-08 | 1.37E-07 |
| NTN1       | 17p13.1  | 0.283963 | 1.62E-08 | 1.38E-07 |
| RAPGEF2    | 4q32.1   | 0.283961 | 1.62E-08 | 1.38E-07 |
| ZNF195     | 11p15.4  | -0.28396 | 1.62E-08 | 1.38E-07 |
| ANKRD54    | 22q13.1  | -0.28393 | 1.62E-08 | 1.38E-07 |
| MPHOSPH6   | 16q23.3  | -0.28391 | 1.63E-08 | 1.39E-07 |
| C9ORF129   | 9q22.31  | 0.283831 | 1.64E-08 | 1.40E-07 |
| ACBD4      | 17q21.31 | -0.28379 | 1.65E-08 | 1.41E-07 |
| CORT       | 1p36.22  | -0.28377 | 1.66E-08 | 1.41E-07 |
| MRPS31     | 13q14.11 | -0.28373 | 1.66E-08 | 1.42E-07 |
| SDR39U1    | 14q12    | -0.28371 | 1.67E-08 | 1.42E-07 |
| BRIX1      | 5p13.2   | -0.28371 | 1.67E-08 | 1.42E-07 |
| DOCK2      | 5q35.1   | 0.283624 | 1.69E-08 | 1.43E-07 |
| PRIMA1     | 14q32.12 | 0.283606 | 1.69E-08 | 1.43E-07 |
| HS3ST3B1   | 17p12    | 0.283562 | 1.70E-08 | 1.44E-07 |
| WDR77      | 1p13.2   | -0.28349 | 1.71E-08 | 1.45E-07 |
| SLC22A11   | 11q13.1  | -0.28339 | 1.73E-08 | 1.47E-07 |
| LOC150776  | 2q21.1   | -0.28338 | 1.74E-08 | 1.47E-07 |
| ATF1       | 12q13.12 | 0.283364 | 1.74E-08 | 1.47E-07 |
| SYCE1L     | 16q23.1  | -0.2833  | 1.75E-08 | 1.48E-07 |
| DUSP4      | 8p12     | 0.283276 | 1.76E-08 | 1.49E-07 |
| GTF2IRD1   | 7q11.23  | -0.28323 | 1.77E-08 | 1.50E-07 |
| CNOT6L     | 4q21.1   | 0.28315  | 1.78E-08 | 1.51E-07 |
| NIBAN1     | 1q25.3   | 0.283143 | 1.79E-08 | 1.51E-07 |
| CD84       | 1q23.3   | 0.283121 | 1.79E-08 | 1.51E-07 |
| DDX60      | 4q32.3   | 0.283107 | 1.79E-08 | 1.52E-07 |
| MFF        | 2q36.3   | -0.2831  | 1.80E-08 | 1.52E-07 |
| STK10      | 5q35.1   | 0.283004 | 1.82E-08 | 1.53E-07 |
| C1ORF226   | 1q23.3   | 0.282953 | 1.83E-08 | 1.54E-07 |
| AGPAT4-IT1 | 6q26     | 0.28287  | 1.85E-08 | 1.56E-07 |

|           |                    |          |          |          |
|-----------|--------------------|----------|----------|----------|
| B3GALT6   | 1p36.33            | -0.28284 | 1.85E-08 | 1.56E-07 |
| PPFIA3    | 19q13.33           | -0.28281 | 1.86E-08 | 1.57E-07 |
| PTPRE     | 10q26.2            | 0.282779 | 1.87E-08 | 1.57E-07 |
| HPSE      | 4q21.23            | 0.282769 | 1.87E-08 | 1.57E-07 |
| TACO1     | 17q23.3            | -0.28275 | 1.87E-08 | 1.58E-07 |
| LAS1L     | Xq12               | -0.28272 | 1.88E-08 | 1.58E-07 |
| CEP85L    | 6q22.31            | 0.282717 | 1.88E-08 | 1.58E-07 |
| SLIT2     | 4p15.31            | 0.282714 | 1.88E-08 | 1.58E-07 |
| SLC25A6   | Xp22.33 and Yp11.2 | -0.28256 | 1.92E-08 | 1.61E-07 |
| SLC35B1   | 17q21.33           | -0.28247 | 1.94E-08 | 1.63E-07 |
| UBE2I     | 16p13.3            | -0.28245 | 1.94E-08 | 1.63E-07 |
| MAD1L1    | 7p22.3             | -0.28243 | 1.95E-08 | 1.63E-07 |
| CIDECP1   | 3p25.3             | -0.28242 | 1.95E-08 | 1.63E-07 |
| TGDS      | 13q32.1            | -0.28239 | 1.96E-08 | 1.64E-07 |
| DPF3      | 14q24.2            | 0.282366 | 1.96E-08 | 1.64E-07 |
| CTSS      | 1q21.3             | 0.282131 | 2.02E-08 | 1.69E-07 |
| CTSV      | 9q22.33            | -0.28212 | 2.02E-08 | 1.69E-07 |
| NAA30     | 14q22.3            | 0.282122 | 2.02E-08 | 1.69E-07 |
| CPSF3     | 2p25.1             | -0.28209 | 2.03E-08 | 1.70E-07 |
| CTSO      | 4q32.1             | 0.282032 | 2.04E-08 | 1.71E-07 |
| TRAPPC4   | 11q23.3            | -0.28203 | 2.04E-08 | 1.71E-07 |
| PNKD      | 2q35               | -0.282   | 2.05E-08 | 1.71E-07 |
| CCM2      | 7p13               | -0.28194 | 2.06E-08 | 1.72E-07 |
| CENPH     | 5q13.2             | -0.28191 | 2.07E-08 | 1.73E-07 |
| IKZF1     | 7p12.2             | 0.281887 | 2.08E-08 | 1.73E-07 |
| PRDX5     | 11q13.1            | -0.28188 | 2.08E-08 | 1.73E-07 |
| LOC388955 | 2p15               | -0.28183 | 2.09E-08 | 1.74E-07 |
| BIRC5     | 17q25.3            | -0.28181 | 2.10E-08 | 1.75E-07 |
| KMT2A     | 11q23.3            | 0.281782 | 2.10E-08 | 1.75E-07 |
| PHC3      | 3q26.2             | 0.281768 | 2.11E-08 | 1.75E-07 |
| SCAF8     | 6q25.2             | 0.281764 | 2.11E-08 | 1.75E-07 |
| RBM43     | 2q23.3             | 0.281716 | 2.12E-08 | 1.76E-07 |
| TRIT1     | 1p34.2             | -0.28171 | 2.12E-08 | 1.76E-07 |
| IL16      | 15q25.1            | 0.281687 | 2.13E-08 | 1.77E-07 |
| ENDOD1    | 11q21              | 0.281676 | 2.13E-08 | 1.77E-07 |
| STYX      | 14q22.1            | 0.281521 | 2.17E-08 | 1.80E-07 |
| NIFK      | 2q14.3             | -0.28147 | 2.18E-08 | 1.81E-07 |
| PAG1      | 8q21.13            | 0.281286 | 2.23E-08 | 1.85E-07 |
| CCNH      | 5q14.3             | -0.28124 | 2.24E-08 | 1.86E-07 |
| RPL6      | 12q24.13           | -0.28123 | 2.25E-08 | 1.86E-07 |
| PKMYT1    | 16p13.3            | -0.2812  | 2.25E-08 | 1.87E-07 |
| YPEL2     | 17q22              | 0.281167 | 2.26E-08 | 1.88E-07 |
| GPC2      | 7q22.1             | -0.28111 | 2.28E-08 | 1.89E-07 |
| TEN1      | 17q25.1            | -0.28099 | 2.31E-08 | 1.91E-07 |
| EME1      | 17q21.33           | -0.28097 | 2.32E-08 | 1.92E-07 |
| UNC45A    | 15q26.1            | 0.280862 | 2.35E-08 | 1.94E-07 |
| DAPP1     | 4q23               | 0.280849 | 2.35E-08 | 1.94E-07 |
| BOP1      | 8q24.3             | -0.28081 | 2.36E-08 | 1.95E-07 |
| IL1RAP    | 3q28               | 0.280771 | 2.37E-08 | 1.96E-07 |
| KIAA1328  | 18q12.2            | 0.280727 | 2.39E-08 | 1.97E-07 |
| HECTD4    | 12q24.13           | 0.280619 | 2.42E-08 | 1.99E-07 |
| ARHGEF11  | 1q23.1             | 0.280572 | 2.43E-08 | 2.01E-07 |
| AK2       | 1p35.1             | -0.28054 | 2.44E-08 | 2.01E-07 |
| SIK2      | 11q23.1            | 0.280515 | 2.45E-08 | 2.02E-07 |
| SMC5      | 9q21.12            | 0.280498 | 2.45E-08 | 2.02E-07 |
| NOC2LP2   | 2q21.1             | -0.28047 | 2.46E-08 | 2.03E-07 |
| DIS3L2    | 2q37.1             | -0.28047 | 2.46E-08 | 2.03E-07 |
| PHF3      | 6q12               | 0.280448 | 2.47E-08 | 2.03E-07 |

|           |                |          |          |          |
|-----------|----------------|----------|----------|----------|
| SLC29A2   | 11q13.2        | -0.28044 | 2.47E-08 | 2.03E-07 |
| THOC7     | 3p14.1         | -0.28041 | 2.48E-08 | 2.04E-07 |
| LDLR      | 19p13.2        | 0.280381 | 2.49E-08 | 2.04E-07 |
| NINJ1     | 9q22.31        | -0.28035 | 2.49E-08 | 2.05E-07 |
| MED1      | 17q12          | 0.280282 | 2.52E-08 | 2.07E-07 |
| SRBD1     | 2p21           | 0.280224 | 2.53E-08 | 2.08E-07 |
| NUAK1     | 12q23.3        | 0.280213 | 2.54E-08 | 2.08E-07 |
| C18ORF25  | 18q21.1        | 0.280058 | 2.58E-08 | 2.12E-07 |
| ARHGEF6   | Xq26.3         | 0.280051 | 2.59E-08 | 2.12E-07 |
| RPL22     | 1p36.31        | -0.28003 | 2.59E-08 | 2.12E-07 |
| PSEN1     | 14q24.2        | 0.27999  | 2.60E-08 | 2.13E-07 |
| LIFR      | 5p13.1         | 0.279968 | 2.61E-08 | 2.14E-07 |
| ATP2A3    | 17p13.2        | 0.279866 | 2.64E-08 | 2.16E-07 |
| TATDN1    | 8q24.13        | -0.27986 | 2.65E-08 | 2.17E-07 |
| ZFYVE26   | 14q24.1        | 0.279701 | 2.70E-08 | 2.21E-07 |
| FAM83B    | 6p12.1         | 0.279685 | 2.70E-08 | 2.21E-07 |
| UBE2G1    | 17p13.2        | 0.279669 | 2.71E-08 | 2.21E-07 |
| SMAD9     | 13q13.3        | 0.279637 | 2.72E-08 | 2.22E-07 |
| LRRC8B    | 1p22.2         | 0.279527 | 2.75E-08 | 2.25E-07 |
| KLF8      | Xp11.21        | 0.27946  | 2.77E-08 | 2.26E-07 |
| CAMK2D    | 4q26           | 0.279362 | 2.81E-08 | 2.29E-07 |
| ATAT1     | 6p21.33        | -0.27935 | 2.81E-08 | 2.29E-07 |
| GNG12     | 1p31.3         | 0.279327 | 2.82E-08 | 2.30E-07 |
| PRR19     | 19q13.2        | -0.27931 | 2.82E-08 | 2.30E-07 |
| NCAPH2    | 22q13.33       | -0.27926 | 2.84E-08 | 2.31E-07 |
| EFCAB10   | 7q22.3         | -0.27926 | 2.84E-08 | 2.31E-07 |
| RPS6      | 9p22.1         | -0.27925 | 2.84E-08 | 2.31E-07 |
| RRS1      | 8q13.1         | -0.27922 | 2.85E-08 | 2.32E-07 |
| DDX24     | 14q32.12       | 0.279214 | 2.86E-08 | 2.32E-07 |
| PIKFYVE   | 2q34           | 0.279135 | 2.88E-08 | 2.34E-07 |
| TOP1P2    | 22q11.23       | -0.27914 | 2.88E-08 | 2.34E-07 |
| BMP2      | 20p12.3        | 0.279093 | 2.90E-08 | 2.35E-07 |
| PCP2      | 19p13.2        | -0.27908 | 2.90E-08 | 2.36E-07 |
| AFF3      | 2q11.2         | 0.279049 | 2.91E-08 | 2.36E-07 |
| PITHD1    | 1p36.11        | -0.27899 | 2.93E-08 | 2.38E-07 |
| KIAA2026  | 9p24.1         | 0.278956 | 2.94E-08 | 2.39E-07 |
| GABPB2    | 1q21.3         | 0.278948 | 2.95E-08 | 2.39E-07 |
| ADAMTS15  | 11q24.3        | 0.278897 | 2.96E-08 | 2.40E-07 |
| LONRF3    | Xq24           | 0.278797 | 3.00E-08 | 2.43E-07 |
| DNAAF5    | 7p22.3         | -0.27879 | 3.00E-08 | 2.43E-07 |
| PTDSS1    | 8q22.1         | -0.27871 | 3.03E-08 | 2.45E-07 |
| CD320     | 19p13.2        | -0.27869 | 3.04E-08 | 2.46E-07 |
| RTF2      | 20q13.31       | -0.27869 | 3.04E-08 | 2.46E-07 |
| ZNF776    | 19q13.43       | 0.278633 | 3.06E-08 | 2.47E-07 |
| BMX       | Xp22.2         | 0.27856  | 3.09E-08 | 2.49E-07 |
| NMNAT3    | 3q23           | -0.27852 | 3.10E-08 | 2.51E-07 |
| TXN       | 9q31.3         | -0.27851 | 3.10E-08 | 2.51E-07 |
| TMEM189   | 20q13.13       | -0.27847 | 3.12E-08 | 2.52E-07 |
| ALOX5     | 10q11.21       | 0.278367 | 3.16E-08 | 2.55E-07 |
| NSMF      | 9q34.3         | -0.27835 | 3.16E-08 | 2.55E-07 |
| NDUFS5    | 1p34.3         | -0.27828 | 3.19E-08 | 2.57E-07 |
| DBF4B     | 17q21.31 17q21 | -0.27828 | 3.19E-08 | 2.57E-07 |
| ZNF573    | 19q13.12       | 0.278123 | 3.25E-08 | 2.62E-07 |
| STIP1     | 11q13.1        | -0.2781  | 3.26E-08 | 2.62E-07 |
| LINC00339 | 1p36.12        | -0.27805 | 3.28E-08 | 2.64E-07 |
| PTPRC     | 1q31.3-q32.1   | 0.278032 | 3.28E-08 | 2.64E-07 |
| STX1A     | 7q11.23        | -0.27799 | 3.30E-08 | 2.65E-07 |
| UPF3A     | 13q34          | -0.27788 | 3.34E-08 | 2.69E-07 |

|            |                |          |          |          |
|------------|----------------|----------|----------|----------|
| KLF4       | 9q31.2         | 0.277822 | 3.37E-08 | 2.71E-07 |
| PAAF1      | 11q13.4        | -0.27777 | 3.39E-08 | 2.72E-07 |
| SLC35D1    | 1p31.3         | 0.277701 | 3.41E-08 | 2.74E-07 |
| TMX3       | 18q22.1        | 0.277666 | 3.43E-08 | 2.75E-07 |
| ERCC6L2    | 9q22.32        | 0.277654 | 3.43E-08 | 2.75E-07 |
| DNASE1     | 16p13.3        | -0.27762 | 3.45E-08 | 2.76E-07 |
| CEP170     | 1q43           | 0.27759  | 3.46E-08 | 2.77E-07 |
| MRPL22     | 5q33.2         | -0.27758 | 3.46E-08 | 2.78E-07 |
| CD28       | 2q33.2         | 0.277476 | 3.51E-08 | 2.81E-07 |
| CAPN2      | 1q41           | 0.27746  | 3.51E-08 | 2.81E-07 |
| CMTM6      | 3p22.3         | 0.277427 | 3.53E-08 | 2.82E-07 |
| P2RY12     | 3q25.1         | 0.277369 | 3.55E-08 | 2.84E-07 |
| MED30      | 8q24.11        | -0.27733 | 3.57E-08 | 2.85E-07 |
| SERPINB8   | 18q22.1        | 0.277241 | 3.60E-08 | 2.88E-07 |
| DGKA       | 12q13.2        | 0.277185 | 3.63E-08 | 2.90E-07 |
| JAGN1      | 3p25.3         | -0.27715 | 3.64E-08 | 2.91E-07 |
| DNAJC2     | 7q22.1         | -0.27712 | 3.65E-08 | 2.92E-07 |
| SH2B1      | 16p11.2        | -0.27712 | 3.66E-08 | 2.92E-07 |
| PDZD8      | 10q25.3-q26.11 | 0.277091 | 3.67E-08 | 2.93E-07 |
| RGS13      | 1q31.2         | 0.277071 | 3.68E-08 | 2.93E-07 |
| GSTK1      | 7q34           | -0.27702 | 3.70E-08 | 2.95E-07 |
| ZNF436-AS1 | 1p36.12        | -0.27701 | 3.70E-08 | 2.95E-07 |
| FBXL15     | 10q24.32       | -0.27699 | 3.71E-08 | 2.96E-07 |
| GMEB2      | 20q13.33       | -0.27694 | 3.74E-08 | 2.97E-07 |
| U2AF1      | 21q22.3        | -0.27692 | 3.74E-08 | 2.98E-07 |
| MPZL1      | 1q24.2         | 0.276914 | 3.75E-08 | 2.98E-07 |
| ABCA11P    | 4p16.3         | -0.27689 | 3.75E-08 | 2.99E-07 |
| PRDM1      | 6q21           | 0.276883 | 3.76E-08 | 2.99E-07 |
| GFPT1      | 2p13.3         | 0.276702 | 3.84E-08 | 3.05E-07 |
| EIF4E3     | 3p13           | 0.276595 | 3.89E-08 | 3.09E-07 |
| PRPF40B    | 12q13.12       | -0.27659 | 3.89E-08 | 3.09E-07 |
| TAS2R20    | 12p13.2        | -0.27659 | 3.89E-08 | 3.09E-07 |
| TAGAP      | 6q25.3         | 0.276566 | 3.90E-08 | 3.10E-07 |
| KCTD1      | 18q11.2        | 0.276531 | 3.92E-08 | 3.11E-07 |
| WDR18      | 19p13.3        | -0.27652 | 3.92E-08 | 3.11E-07 |
| TNFSF8     | 9q32-q33.1     | 0.276515 | 3.92E-08 | 3.11E-07 |
| MCTS1      | Xq24           | -0.2765  | 3.93E-08 | 3.12E-07 |
| RPS14      | 5q33.1         | -0.27647 | 3.94E-08 | 3.12E-07 |
| ABI1       | 10p12.1        | 0.27637  | 3.99E-08 | 3.16E-07 |
| SYNJ2      | 6q25.3         | 0.276344 | 4.00E-08 | 3.17E-07 |
| HSBP1      | 16q23.3        | -0.27634 | 4.01E-08 | 3.17E-07 |
| RC3H1      | 1q25.1         | 0.276237 | 4.05E-08 | 3.21E-07 |
| SFMBT2     | 10p14          | 0.276139 | 4.10E-08 | 3.24E-07 |
| ABHD17A    | 19p13.3        | -0.27612 | 4.11E-08 | 3.25E-07 |
| NHSL2      | Xq13.1         | 0.27591  | 4.21E-08 | 3.33E-07 |
| MRPS16     | 10q22.2        | -0.27584 | 4.25E-08 | 3.35E-07 |
| KIF22      | 16p11.2        | -0.27581 | 4.26E-08 | 3.36E-07 |
| AUNIP      | 1p36.11        | -0.2758  | 4.26E-08 | 3.36E-07 |
| PHKB       | 16q12.1        | 0.275787 | 4.27E-08 | 3.37E-07 |
| FAM207A    | 21q22.3        | -0.27577 | 4.28E-08 | 3.37E-07 |
| FBXO38     | 5q32           | 0.275771 | 4.28E-08 | 3.37E-07 |
| SLC19A1    | 21q22.3        | -0.27575 | 4.29E-08 | 3.38E-07 |
| PMS2P1     | 7q22.1         | -0.27568 | 4.32E-08 | 3.40E-07 |
| PTPRJ      | 11p11.2        | 0.275681 | 4.33E-08 | 3.40E-07 |
| CHMP2A     | 19q13.43       | -0.2756  | 4.37E-08 | 3.43E-07 |
| BRICD5     | 16p13.3        | -0.2756  | 4.37E-08 | 3.43E-07 |
| CCR4       | 3p22.3         | 0.275575 | 4.38E-08 | 3.44E-07 |
| COX7A2L    | 2p21           | -0.27557 | 4.38E-08 | 3.44E-07 |

|              |                 |          |          |          |
|--------------|-----------------|----------|----------|----------|
| UQCRB        | 8q22.1          | -0.27556 | 4.39E-08 | 3.45E-07 |
| CHL1         | 3p26.3          | 0.275507 | 4.42E-08 | 3.47E-07 |
| ALG8         | 11q14.1         | -0.27536 | 4.49E-08 | 3.52E-07 |
| ATP5F1EP2    | 13q12.2         | -0.27529 | 4.53E-08 | 3.55E-07 |
| WASH5P       | 19p13.3         | -0.27522 | 4.57E-08 | 3.58E-07 |
| TIPARP-AS1   | 3q25.31         | -0.27512 | 4.62E-08 | 3.62E-07 |
| PLEKHB2      | 2q21.1          | 0.275058 | 4.65E-08 | 3.65E-07 |
| PPFIBP1      | 12p11.23-p11.22 | 0.275014 | 4.68E-08 | 3.66E-07 |
| YBX1         | 1p34.2          | -0.27501 | 4.68E-08 | 3.66E-07 |
| TRAPPC11     | 4q35.1          | 0.274939 | 4.72E-08 | 3.69E-07 |
| GPR34        | Xp11.4          | 0.274921 | 4.73E-08 | 3.70E-07 |
| EIF3M        | 11p13           | -0.27491 | 4.73E-08 | 3.70E-07 |
| B3GALT5      | 21q22.2         | 0.274906 | 4.74E-08 | 3.70E-07 |
| YARS         | 1p35.1          | -0.27488 | 4.75E-08 | 3.71E-07 |
| FBXO2        | 1p36.22         | -0.27486 | 4.76E-08 | 3.72E-07 |
| LINC00634    | 22q13.2         | -0.27482 | 4.78E-08 | 3.73E-07 |
| ZMAT5        | 22q12.2         | -0.27479 | 4.80E-08 | 3.75E-07 |
| URB1-AS1     | 21q22.11        | -0.27474 | 4.83E-08 | 3.77E-07 |
| BOLA3        | 2p13.1          | -0.27474 | 4.83E-08 | 3.77E-07 |
| CETN2        | Xq28            | -0.27474 | 4.83E-08 | 3.77E-07 |
| ADGRG6       | 6q24.2          | 0.274693 | 4.85E-08 | 3.78E-07 |
| GSDMD        | 8q24.3          | -0.27461 | 4.90E-08 | 3.82E-07 |
| ZNF26        | 12q24.33        | -0.2746  | 4.91E-08 | 3.82E-07 |
| TLDC2        | 20q11.23        | -0.27454 | 4.94E-08 | 3.85E-07 |
| RBM39        | 20q11.22        | -0.27453 | 4.95E-08 | 3.85E-07 |
| HS1BP3       | 2p24.1          | -0.27447 | 4.98E-08 | 3.88E-07 |
| F11R         | 1q23.3          | 0.274451 | 4.99E-08 | 3.88E-07 |
| ABI3BP       | 3q12.2          | 0.27443  | 5.01E-08 | 3.89E-07 |
| RNF11        | 1p32.3          | 0.27442  | 5.01E-08 | 3.89E-07 |
| TLL1         | 4q32.3          | 0.274417 | 5.01E-08 | 3.89E-07 |
| DHX29        | 5q11.2          | 0.27439  | 5.03E-08 | 3.90E-07 |
| SERINC5      | 5q14.1          | 0.274334 | 5.06E-08 | 3.93E-07 |
| SGMS1        | 10q11.23        | 0.274322 | 5.07E-08 | 3.93E-07 |
| RPS24        | 10q22.3         | -0.27431 | 5.07E-08 | 3.93E-07 |
| LOC100272217 | 9q34.11         | -0.27424 | 5.12E-08 | 3.97E-07 |
| PEF1         | 1p35.2          | -0.27421 | 5.13E-08 | 3.98E-07 |
| RNFT2        | 12q24.22        | -0.2742  | 5.14E-08 | 3.98E-07 |
| TRIM44       | 11p13           | 0.274197 | 5.14E-08 | 3.98E-07 |
| CD55         | 1q32.2          | 0.274137 | 5.18E-08 | 4.01E-07 |
| OST4         | 2p23.3          | -0.27413 | 5.18E-08 | 4.01E-07 |
| RIT1         | 1q22            | 0.274087 | 5.21E-08 | 4.03E-07 |
| NUFIP1       | 13q14.12        | -0.27409 | 5.21E-08 | 4.03E-07 |
| PRSS12       | 4q26            | 0.274075 | 5.22E-08 | 4.03E-07 |
| UBL4A        | Xq28            | -0.27407 | 5.22E-08 | 4.03E-07 |
| RNF220       | 1p34.1          | -0.27402 | 5.25E-08 | 4.05E-07 |
| SAMD9L       | 7q21.2          | 0.274019 | 5.25E-08 | 4.05E-07 |
| BICRAL       | 6p21.1          | 0.27401  | 5.26E-08 | 4.05E-07 |
| CYBB         | Xp21.1-p11.4    | 0.274006 | 5.26E-08 | 4.05E-07 |
| TNFAIP8      | 5q23.1          | 0.273933 | 5.30E-08 | 4.09E-07 |
| MBD3         | 19p13.3         | -0.27389 | 5.33E-08 | 4.10E-07 |
| LOC155060    | 7q36.1          | -0.27389 | 5.33E-08 | 4.11E-07 |
| SPRN         | 10q26.3         | -0.2738  | 5.39E-08 | 4.15E-07 |
| SF3A2        | 19p13.3         | -0.27378 | 5.40E-08 | 4.16E-07 |
| NAT16        | 7q22.1          | -0.27377 | 5.41E-08 | 4.16E-07 |
| LOC642846    | 12p13.31        | -0.27377 | 5.41E-08 | 4.16E-07 |
| SLC7A6OS     | 16q22.1         | -0.27373 | 5.43E-08 | 4.17E-07 |
| MPEG1        | 11q12.1         | 0.273718 | 5.44E-08 | 4.18E-07 |
| NUP42        | 7p15.3          | -0.27369 | 5.46E-08 | 4.19E-07 |



|          |                |          |          |          |
|----------|----------------|----------|----------|----------|
| ZNF688   | 16p11.2        | -0.27368 | 5.46E-08 | 4.19E-07 |
| C16ORF74 | 16q24.1        | -0.27366 | 5.47E-08 | 4.20E-07 |
| MFSD9    | 2q12.1         | 0.273626 | 5.50E-08 | 4.22E-07 |
| ARHGAP42 | 11q22.1        | 0.273588 | 5.52E-08 | 4.23E-07 |
| FAM156A  | Xp11.22        | -0.27358 | 5.53E-08 | 4.24E-07 |
| CTAGE1   | 18q11.2        | 0.273573 | 5.53E-08 | 4.24E-07 |
| TEX12    | 11q23.1        | -0.27353 | 5.55E-08 | 4.26E-07 |
| TOX      | 8q12.1         | 0.273441 | 5.61E-08 | 4.30E-07 |
| IL32     | 16p13.3        | -0.27341 | 5.63E-08 | 4.31E-07 |
| PRKD1    | 14q12          | 0.273409 | 5.63E-08 | 4.31E-07 |
| SRRT     | 7q22.1         | -0.27336 | 5.66E-08 | 4.33E-07 |
| FKBP8    | 19p13.11       | -0.27336 | 5.67E-08 | 4.33E-07 |
| ITPRIPL2 | 16p12.3        | 0.273355 | 5.67E-08 | 4.33E-07 |
| SLAMF6   | 1q23.2-q23.3   | 0.273345 | 5.68E-08 | 4.34E-07 |
| RHBDL1   | 16p13.3        | -0.27329 | 5.71E-08 | 4.36E-07 |
| ZKSCAN8  | 6p22.1         | 0.27329  | 5.71E-08 | 4.36E-07 |
| ALKBH2   | 12q24.11       | -0.27321 | 5.77E-08 | 4.40E-07 |
| RAB17    | 2q37.3         | -0.2732  | 5.78E-08 | 4.41E-07 |
| TIGD3    | 11q13.1        | -0.27312 | 5.83E-08 | 4.44E-07 |
| TOX4     | 14q11.2        | 0.273092 | 5.85E-08 | 4.46E-07 |
| HILPDA   | 7q32.1         | -0.27305 | 5.87E-08 | 4.48E-07 |
| ARID3B   | 15q24.1        | 0.272947 | 5.94E-08 | 4.53E-07 |
| MTMR9    | 8p23.1         | 0.272931 | 5.95E-08 | 4.53E-07 |
| ATP5MD   | 10q24.33       | -0.27293 | 5.96E-08 | 4.53E-07 |
| OTUD1    | 10p12.2        | 0.272924 | 5.96E-08 | 4.53E-07 |
| HRH1     | 3p25.3         | 0.272876 | 5.99E-08 | 4.56E-07 |
| NFIC     | 19p13.3        | 0.272832 | 6.02E-08 | 4.58E-07 |
| C5ORF51  | 5p13.1         | 0.272828 | 6.03E-08 | 4.58E-07 |
| WDR11    | 10q26.12       | 0.272814 | 6.04E-08 | 4.59E-07 |
| NUDT16L1 | 16p13.3        | -0.27278 | 6.06E-08 | 4.60E-07 |
| PRKG1    | 10q11.23-q21.1 | 0.272756 | 6.08E-08 | 4.61E-07 |
| DOHH     | 19p13.3        | -0.27275 | 6.08E-08 | 4.61E-07 |
| TRERF1   | 6p21.1         | 0.272746 | 6.08E-08 | 4.62E-07 |
| TNFRSF21 | 6p12.3         | 0.272655 | 6.15E-08 | 4.66E-07 |
| PPM1D    | 17q23.2        | 0.272612 | 6.18E-08 | 4.68E-07 |
| CLDN15   | 7q22.1         | -0.27257 | 6.21E-08 | 4.71E-07 |
| EFNA5    | 5q21.3         | 0.272562 | 6.21E-08 | 4.71E-07 |
| PIGS     | 17q11.2        | 0.272395 | 6.34E-08 | 4.80E-07 |
| FTH1     | 11q12.3        | -0.27231 | 6.40E-08 | 4.84E-07 |
| MLPH     | 2q37.3         | 0.272217 | 6.47E-08 | 4.89E-07 |
| PHACTR2  | 6q24.2         | 0.272159 | 6.51E-08 | 4.92E-07 |
| CYTIP    | 2q24.1         | 0.272141 | 6.52E-08 | 4.93E-07 |
| PSMA5    | 1p13.3         | -0.27205 | 6.59E-08 | 4.98E-07 |
| NFKBIB   | 19q13.2        | -0.27198 | 6.65E-08 | 5.02E-07 |
| PRKAR2A  | 3p21.31        | 0.271929 | 6.68E-08 | 5.05E-07 |
| PHPT1    | 9q34.3         | -0.27191 | 6.70E-08 | 5.06E-07 |
| FKBPL    | 6p21.32        | -0.27189 | 6.71E-08 | 5.07E-07 |
| MIER1    | 1p31.3         | 0.271879 | 6.72E-08 | 5.07E-07 |
| PIRT     | 17p12          | 0.271856 | 6.74E-08 | 5.08E-07 |
| MDM2     | 12q15          | 0.271807 | 6.78E-08 | 5.11E-07 |
| NDRG3    | 20q11.23       | -0.2718  | 6.78E-08 | 5.11E-07 |
| RPP38-DT | 10p13          | -0.27179 | 6.79E-08 | 5.11E-07 |
| GDPGP1   | 15q26.1        | 0.271773 | 6.80E-08 | 5.12E-07 |
| TNKS     | 8p23.1         | 0.271708 | 6.86E-08 | 5.16E-07 |
| CCDC150  | 2q33.1         | -0.27169 | 6.87E-08 | 5.17E-07 |
| MRPS2    | 9q34.3         | -0.27168 | 6.88E-08 | 5.17E-07 |
| SLC16A2  | Xq13.2         | 0.271663 | 6.89E-08 | 5.18E-07 |
| UQCRHL   | 1p36.21        | -0.27166 | 6.89E-08 | 5.18E-07 |

|         |                |          |          |          |
|---------|----------------|----------|----------|----------|
| MYOCD   | 17p12          | 0.271628 | 6.92E-08 | 5.20E-07 |
| SEC16A  | 9q34.3         | 0.271447 | 7.07E-08 | 5.31E-07 |
| LRRC75B | 22q11.23       | -0.27125 | 7.23E-08 | 5.42E-07 |
| TSHZ2   | 20q13.2        | 0.271168 | 7.29E-08 | 5.47E-07 |
| DHX9    | 1q25.3         | 0.271101 | 7.35E-08 | 5.51E-07 |
| EEA1    | 12q22          | 0.271071 | 7.38E-08 | 5.53E-07 |
| ST7-AS1 | 7q31.2         | -0.27085 | 7.57E-08 | 5.67E-07 |
| DUS4L   | 7q22.3         | -0.27078 | 7.62E-08 | 5.71E-07 |
| LEMD2   | 6p21.31        | -0.27077 | 7.64E-08 | 5.72E-07 |
| UFD1    | 22q11.21       | -0.27074 | 7.66E-08 | 5.73E-07 |
| NXPE3   | 3q12.3         | 0.270734 | 7.67E-08 | 5.74E-07 |
| MBD5    | 2q23.1         | 0.270717 | 7.68E-08 | 5.75E-07 |
| PHIP    | 6q14.1         | 0.27063  | 7.76E-08 | 5.80E-07 |
| CYSLTR1 | Xq21.1         | 0.270614 | 7.77E-08 | 5.81E-07 |
| MRPL13  | 8q24.12        | -0.27055 | 7.83E-08 | 5.85E-07 |
| GNB2    | 7q22.1         | -0.27054 | 7.83E-08 | 5.85E-07 |
| PSMD14  | 2q24.2         | -0.27052 | 7.86E-08 | 5.87E-07 |
| PEX26   | 22q11.21       | 0.270414 | 7.95E-08 | 5.94E-07 |
| ZNF804A | 2q32.1         | 0.270388 | 7.98E-08 | 5.95E-07 |
| NQO2    | 6p25.2         | -0.27038 | 7.98E-08 | 5.96E-07 |
| STK19   | 6p21.33        | -0.27032 | 8.04E-08 | 5.99E-07 |
| CCDC73  | 11p13          | -0.27022 | 8.13E-08 | 6.06E-07 |
| TRPC4AP | 20q11.22       | -0.27021 | 8.14E-08 | 6.06E-07 |
| SAMD10  | 20q13.33       | -0.27019 | 8.16E-08 | 6.08E-07 |
| SIPA1L3 | 19q13.13-q13.2 | 0.270144 | 8.20E-08 | 6.11E-07 |
| ITGB3   | 17q21.32       | 0.270142 | 8.20E-08 | 6.11E-07 |
| TMEM219 | 16p11.2        | -0.27014 | 8.21E-08 | 6.11E-07 |
| PITPNM3 | 17p13.2-p13.1  | 0.270044 | 8.30E-08 | 6.17E-07 |
| PPDPF   | 20q13.33       | -0.27004 | 8.30E-08 | 6.17E-07 |
| ANXA9   | 1q21.3         | -0.27002 | 8.32E-08 | 6.18E-07 |
| MTX1    | 1q22           | -0.26993 | 8.40E-08 | 6.24E-07 |
| TWSG1   | 18p11.22       | 0.269917 | 8.42E-08 | 6.25E-07 |
| XAB2    | 19p13.2        | -0.26991 | 8.43E-08 | 6.25E-07 |
| PSRC1   | 1p13.3         | -0.2698  | 8.53E-08 | 6.33E-07 |
| FRMD3   | 9q21.32        | 0.269792 | 8.54E-08 | 6.33E-07 |
| LPIN2   | 18p11.31       | 0.269756 | 8.57E-08 | 6.36E-07 |
| SLC12A2 | 5q23.3         | 0.269734 | 8.59E-08 | 6.37E-07 |
| EFCAB14 | 1p33           | 0.269691 | 8.64E-08 | 6.40E-07 |
| POMGNT1 | 1p34.1         | -0.26969 | 8.64E-08 | 6.40E-07 |
| PTPN14  | 1q32.3-q41     | 0.269638 | 8.69E-08 | 6.43E-07 |
| TAF12   | 1p35.3         | -0.26962 | 8.71E-08 | 6.45E-07 |
| ACER2   | 9p22.1         | 0.269575 | 8.75E-08 | 6.47E-07 |
| CAPN9   | 1q42.2         | 0.26942  | 8.91E-08 | 6.59E-07 |
| LAMTOR2 | 1q22           | -0.2694  | 8.92E-08 | 6.60E-07 |
| BOD1    | 5q35.2         | -0.26939 | 8.94E-08 | 6.61E-07 |
| DOCK1   | 10q26.2        | 0.269333 | 9.00E-08 | 6.65E-07 |
| ZNF616  | 19q13.41       | 0.269289 | 9.04E-08 | 6.68E-07 |
| PDXP    | 22q13.1        | -0.26921 | 9.12E-08 | 6.73E-07 |
| NACA2   | 17q23.2        | -0.26921 | 9.13E-08 | 6.73E-07 |
| HSPD1   | 2q33.1         | -0.2692  | 9.13E-08 | 6.73E-07 |
| POLD1   | 19q13.33       | -0.26909 | 9.25E-08 | 6.82E-07 |
| CCDC57  | 17q25.3        | -0.26907 | 9.27E-08 | 6.83E-07 |
| ABC8    | 7q36.1         | -0.26906 | 9.27E-08 | 6.83E-07 |
| EAF1    | 3p25.1         | 0.269038 | 9.30E-08 | 6.85E-07 |
| CALM1   | 14q32.11       | 0.269038 | 9.30E-08 | 6.85E-07 |
| MRM1    | 17q12          | -0.26901 | 9.33E-08 | 6.87E-07 |
| USP53   | 4q26           | 0.268989 | 9.35E-08 | 6.88E-07 |
| DNAJC15 | 13q14.11       | -0.26894 | 9.41E-08 | 6.92E-07 |

|          |                    |          |          |          |
|----------|--------------------|----------|----------|----------|
| PLEKHA6  | 1q32.1             | 0.268933 | 9.41E-08 | 6.92E-07 |
| LATS2    | 13q12.11           | 0.268806 | 9.55E-08 | 7.02E-07 |
| DECR2    | 16p13.3            | -0.26877 | 9.60E-08 | 7.05E-07 |
| DANCR    | 4q12               | -0.26868 | 9.69E-08 | 7.12E-07 |
| HDAC3    | 5q31.3             | -0.26866 | 9.72E-08 | 7.13E-07 |
| MR1      | 1q25.3             | 0.268649 | 9.72E-08 | 7.14E-07 |
| OSBP     | 11q12.1            | 0.268493 | 9.90E-08 | 7.26E-07 |
| TCP11L1  | 11p13              | 0.268458 | 9.94E-08 | 7.29E-07 |
| CKAP4    | 12q23.3            | 0.268422 | 9.98E-08 | 7.31E-07 |
| STT3B    | 3p23               | 0.268341 | 1.01E-07 | 7.38E-07 |
| TMEM220  | 17p13.1            | 0.268334 | 1.01E-07 | 7.38E-07 |
| FRS3     | 6p21.1             | -0.26827 | 1.02E-07 | 7.44E-07 |
| ZFR      | 5p13.3             | 0.268258 | 1.02E-07 | 7.44E-07 |
| GMPPA    | 2q35               | -0.26824 | 1.02E-07 | 7.45E-07 |
| DOC2B    | 17p13.3            | 0.268236 | 1.02E-07 | 7.45E-07 |
| GPR82    | Xp11.4             | 0.268227 | 1.02E-07 | 7.46E-07 |
| LRRC47   | 1p36.32            | -0.2682  | 1.02E-07 | 7.48E-07 |
| TNFRSF14 | 1p36.32            | -0.26816 | 1.03E-07 | 7.51E-07 |
| ZC3H12C  | 11q22.3            | 0.268155 | 1.03E-07 | 7.51E-07 |
| ZBTB21   | 21q22.3            | 0.268151 | 1.03E-07 | 7.51E-07 |
| B3GALT1  | 2q24.3             | 0.267993 | 1.05E-07 | 7.64E-07 |
| MMRN1    | 4q22.1             | 0.26798  | 1.05E-07 | 7.65E-07 |
| DR1      | 1p22.1             | 0.26797  | 1.05E-07 | 7.66E-07 |
| RASSF2   | 20p13              | 0.267924 | 1.06E-07 | 7.70E-07 |
| RPS6KA5  | 14q32.11           | 0.267917 | 1.06E-07 | 7.70E-07 |
| OBP2B    | 9q34.2             | -0.26788 | 1.06E-07 | 7.73E-07 |
| ASMTL    | Xp22.33 and Yp11.2 | -0.26773 | 1.08E-07 | 7.86E-07 |
| ARCN1    | 11q23.3            | 0.267662 | 1.09E-07 | 7.92E-07 |
| PIK3R2   | 19p13.11           | -0.26765 | 1.09E-07 | 7.92E-07 |
| TAF11    | 6p21.31            | -0.26761 | 1.09E-07 | 7.95E-07 |
| OSMR     | 5p13.1             | 0.267554 | 1.10E-07 | 8.00E-07 |
| HIVEP3   | 1p34.2             | 0.267549 | 1.10E-07 | 8.01E-07 |
| IQCB1    | 3q13.33 3q21.1     | -0.26751 | 1.11E-07 | 8.04E-07 |
| DNTTIP1  | 20q13.12           | -0.26748 | 1.11E-07 | 8.06E-07 |
| SLC25A22 | 11p15.5            | -0.2674  | 1.12E-07 | 8.13E-07 |
| CLYBL    | 13q32.3            | -0.26739 | 1.12E-07 | 8.14E-07 |
| IDE      | 10q23.33           | 0.267361 | 1.13E-07 | 8.16E-07 |
| ZNF133   | 20p11.23           | -0.26736 | 1.13E-07 | 8.16E-07 |
| SVBP     | 1p34.2             | -0.26735 | 1.13E-07 | 8.17E-07 |
| CHML     | 1q43               | 0.267312 | 1.13E-07 | 8.20E-07 |
| FLI1     | 11q24.3            | 0.267287 | 1.13E-07 | 8.22E-07 |
| EPRS     | 1q41               | 0.267251 | 1.14E-07 | 8.25E-07 |
| ENTPD7   | 10q24.2            | 0.267218 | 1.14E-07 | 8.28E-07 |
| VPS35L   | 16p12.3            | 0.267162 | 1.15E-07 | 8.33E-07 |
| ABHD5    | 3p21.33            | 0.267135 | 1.15E-07 | 8.35E-07 |
| DNAJC19  | 3q26.33            | -0.26713 | 1.16E-07 | 8.36E-07 |
| POLL     | 10q24.32           | -0.26706 | 1.16E-07 | 8.42E-07 |
| GRAP2    | 22q13.1            | 0.267008 | 1.17E-07 | 8.46E-07 |
| VPS53    | 17p13.3            | 0.267002 | 1.17E-07 | 8.46E-07 |
| C8ORF33  | 8q24.3             | -0.26687 | 1.19E-07 | 8.59E-07 |
| DCAF5    | 14q24.1            | 0.266812 | 1.20E-07 | 8.64E-07 |
| RABEP2   | 16p11.2            | -0.26669 | 1.21E-07 | 8.76E-07 |
| KIF21A   | 12q12              | 0.266611 | 1.22E-07 | 8.83E-07 |
| CCDC88A  | 2p16.1             | 0.266607 | 1.22E-07 | 8.83E-07 |
| RHBDD2   | 7q11.23            | -0.26657 | 1.23E-07 | 8.86E-07 |
| GIGYF2   | 2q37.1             | 0.266565 | 1.23E-07 | 8.87E-07 |
| FBXL17   | 5q21.3             | 0.266558 | 1.23E-07 | 8.87E-07 |
| CFAP20   | 16q21              | -0.26654 | 1.23E-07 | 8.88E-07 |

|           |          |          |          |          |
|-----------|----------|----------|----------|----------|
| SNORA10   | 16p13.3  | -0.26654 | 1.23E-07 | 8.89E-07 |
| ARHGEF28  | 5q13.2   | 0.266518 | 1.24E-07 | 8.90E-07 |
| LRRIQ4    | 3q26.2   | 0.266511 | 1.24E-07 | 8.91E-07 |
| RCL1      | 9p24.1   | -0.26649 | 1.24E-07 | 8.92E-07 |
| ZNF668    | 16p11.2  | -0.26647 | 1.24E-07 | 8.94E-07 |
| STOX2     | 4q35.1   | 0.266426 | 1.25E-07 | 8.98E-07 |
| RNF113A   | Xq24     | -0.26635 | 1.26E-07 | 9.05E-07 |
| BCL10     | 1p22.3   | 0.266351 | 1.26E-07 | 9.05E-07 |
| ASB6      | 9q34.11  | -0.26633 | 1.26E-07 | 9.07E-07 |
| VEZT      | 12q22    | 0.266273 | 1.27E-07 | 9.13E-07 |
| PYCR1     | 17q25.3  | -0.26624 | 1.28E-07 | 9.16E-07 |
| KLHL6     | 3q27.1   | 0.266207 | 1.28E-07 | 9.19E-07 |
| ST3GAL4   | 11q24.2  | 0.2662   | 1.28E-07 | 9.19E-07 |
| CHMP1A    | 16q24.3  | -0.26618 | 1.28E-07 | 9.20E-07 |
| ESYT1     | 12q13.2  | 0.266161 | 1.29E-07 | 9.22E-07 |
| LRIG3     | 12q14.1  | 0.266159 | 1.29E-07 | 9.22E-07 |
| AGMAT     | 1p36.21  | -0.26601 | 1.31E-07 | 9.38E-07 |
| COX7A2    | 6q14.1   | -0.266   | 1.31E-07 | 9.38E-07 |
| HSPG2     | 1p36.12  | 0.265964 | 1.32E-07 | 9.42E-07 |
| SLC25A40  | 7q21.12  | 0.265961 | 1.32E-07 | 9.42E-07 |
| ATP2B4    | 1q32.1   | 0.265916 | 1.32E-07 | 9.46E-07 |
| AP5M1     | 14q22.3  | 0.265846 | 1.33E-07 | 9.53E-07 |
| TMEM140   | 7q33     | 0.265844 | 1.33E-07 | 9.53E-07 |
| DIAPH1    | 5q31.3   | 0.26582  | 1.34E-07 | 9.55E-07 |
| EMSY      | 11q13.5  | 0.265687 | 1.36E-07 | 9.69E-07 |
| GABPA     | 21q21.3  | 0.265664 | 1.36E-07 | 9.72E-07 |
| PUS3      | 11q24.2  | -0.26565 | 1.36E-07 | 9.72E-07 |
| MAZ       | 16p11.2  | -0.2656  | 1.37E-07 | 9.78E-07 |
| WASF2     | 1p36.11  | 0.265541 | 1.38E-07 | 9.84E-07 |
| TRAPPC6A  | 19q13.32 | -0.26537 | 1.41E-07 | 1.00E-06 |
| PIH1D2    | 11q23.1  | -0.26536 | 1.41E-07 | 1.00E-06 |
| HAGH      | 16p13.3  | -0.26536 | 1.41E-07 | 1.00E-06 |
| TAPT1-AS1 | 4p15.32  | -0.26532 | 1.41E-07 | 1.01E-06 |
| KIFAP3    | 1q24.2   | 0.265279 | 1.42E-07 | 1.01E-06 |
| COMT      | 22q11.21 | -0.26527 | 1.42E-07 | 1.01E-06 |
| PSMC2     | 7q22.1   | -0.26519 | 1.44E-07 | 1.02E-06 |
| MEMO1     | 2p22.3   | -0.26518 | 1.44E-07 | 1.02E-06 |
| CIAPIN1   | 16q21    | -0.26516 | 1.44E-07 | 1.02E-06 |
| CACNA2D1  | 7q21.11  | 0.265112 | 1.45E-07 | 1.03E-06 |
| PRKCSH    | 19p13.2  | -0.2651  | 1.45E-07 | 1.03E-06 |
| ZFAND6    | 15q25.1  | 0.265081 | 1.45E-07 | 1.03E-06 |
| GNS       | 12q14.3  | 0.265019 | 1.46E-07 | 1.04E-06 |
| C2CD5     | 12p12.1  | 0.265016 | 1.46E-07 | 1.04E-06 |
| FBRSL1    | 12q24.33 | -0.26494 | 1.48E-07 | 1.05E-06 |
| PPM1G     | 2p23.3   | -0.26492 | 1.48E-07 | 1.05E-06 |
| SPR       | 2p13.2   | -0.26489 | 1.49E-07 | 1.05E-06 |
| GTF2I     | 7q11.23  | 0.26474  | 1.51E-07 | 1.07E-06 |
| ABHD3     | 18q11.2  | 0.264738 | 1.51E-07 | 1.07E-06 |
| ZDHHC8    | 22q11.21 | -0.26466 | 1.52E-07 | 1.08E-06 |
| LINC-PINT | 7q32.3   | -0.26465 | 1.53E-07 | 1.08E-06 |
| MTM1      | Xq28     | 0.264605 | 1.53E-07 | 1.08E-06 |
| ANKRD52   | 12q13.3  | 0.264575 | 1.54E-07 | 1.09E-06 |
| INAVA     | 1q32.1   | 0.264573 | 1.54E-07 | 1.09E-06 |
| DCAF7     | 17q23.3  | 0.264554 | 1.54E-07 | 1.09E-06 |
| DPYD      | 1p21.3   | 0.264516 | 1.55E-07 | 1.09E-06 |
| KHNYN     | 14q12    | 0.264508 | 1.55E-07 | 1.09E-06 |
| ACP1      | 2p25.3   | -0.2645  | 1.55E-07 | 1.09E-06 |
| BNIP2     | 15q22.2  | 0.264473 | 1.56E-07 | 1.10E-06 |

|          |                   |          |          |          |
|----------|-------------------|----------|----------|----------|
| MCU      | 10q22.1           | 0.264419 | 1.57E-07 | 1.10E-06 |
| GRPEL1   | 4p16.1            | -0.26441 | 1.57E-07 | 1.10E-06 |
| PDCD4    | 10q25.2           | 0.264336 | 1.58E-07 | 1.11E-06 |
| SLC2A10  | 20q13.12          | 0.264269 | 1.59E-07 | 1.12E-06 |
| SLFN5    | 17q12             | 0.264248 | 1.60E-07 | 1.12E-06 |
| CX3CR1   | 3p22.2            | 0.264234 | 1.60E-07 | 1.12E-06 |
| PPP1R9A  | 7q21.3            | 0.264096 | 1.62E-07 | 1.14E-06 |
| BTBD8    | 1p22.1            | 0.264049 | 1.63E-07 | 1.15E-06 |
| TMCO6    | 5q31.3            | -0.26401 | 1.64E-07 | 1.15E-06 |
| UTP4     | 16q22.1           | -0.26397 | 1.65E-07 | 1.16E-06 |
| PTGFRN   | 1p13.1            | 0.263957 | 1.65E-07 | 1.16E-06 |
| MSMP     | 9p13.3            | 0.263912 | 1.66E-07 | 1.16E-06 |
| AIG1     | 6q24.2            | -0.2639  | 1.66E-07 | 1.16E-06 |
| ZNF268   | 12q24.33          | 0.263884 | 1.66E-07 | 1.17E-06 |
| SPSB2    | 12p13.31          | -0.26381 | 1.68E-07 | 1.18E-06 |
| B4GALT7  | 5q35.3            | -0.26375 | 1.69E-07 | 1.18E-06 |
| TM7SF2   | 11q13.1           | -0.26373 | 1.69E-07 | 1.19E-06 |
| MEX3B    | 15q25.2           | 0.263467 | 1.74E-07 | 1.22E-06 |
| SPATC1L  | 21q22.3           | -0.26341 | 1.75E-07 | 1.23E-06 |
| RSRP1    | 1p36.11           | -0.26331 | 1.77E-07 | 1.24E-06 |
| IGHMBP2  | 11q13.3           | -0.26326 | 1.78E-07 | 1.25E-06 |
| SYTL2    | 11q14.1           | 0.263152 | 1.80E-07 | 1.26E-06 |
| PELI1    | 2p14              | 0.263152 | 1.80E-07 | 1.26E-06 |
| NARS2    | 11q14.1           | -0.26314 | 1.80E-07 | 1.26E-06 |
| NDUFAF6  | 8q22.1            | -0.2631  | 1.81E-07 | 1.27E-06 |
| UQCRH    | 1p33              | -0.2631  | 1.81E-07 | 1.27E-06 |
| HDHD3    | 9q32              | -0.26308 | 1.82E-07 | 1.27E-06 |
| DPY19L3  | 19q13.11          | 0.263054 | 1.82E-07 | 1.27E-06 |
| ADK      | 10q22.2 10q11-q24 | -0.26304 | 1.82E-07 | 1.27E-06 |
| POP4     | 19q12             | -0.26303 | 1.83E-07 | 1.27E-06 |
| SUN2     | 22q13.1           | 0.26303  | 1.83E-07 | 1.27E-06 |
| KLHL11   | 17q21.2           | 0.263017 | 1.83E-07 | 1.28E-06 |
| LCP1     | 13q14.13          | 0.263006 | 1.83E-07 | 1.28E-06 |
| PPOX     | 1q23.3            | -0.263   | 1.83E-07 | 1.28E-06 |
| KLF16    | 19p13.3           | -0.26299 | 1.83E-07 | 1.28E-06 |
| ASB13    | 10p15.1           | -0.26295 | 1.84E-07 | 1.28E-06 |
| VPS25    | 17q21.2           | -0.26295 | 1.84E-07 | 1.28E-06 |
| EYA3     | 1p35.3            | 0.262932 | 1.85E-07 | 1.29E-06 |
| DKC1     | Xq28              | -0.26292 | 1.85E-07 | 1.29E-06 |
| ATP8A2   | 13q12.13          | 0.262854 | 1.86E-07 | 1.30E-06 |
| TOX2     | 20q13.12          | 0.26284  | 1.87E-07 | 1.30E-06 |
| FBXL5    | 4p15.32           | 0.262822 | 1.87E-07 | 1.30E-06 |
| TACC2    | 10q26.13          | 0.262805 | 1.87E-07 | 1.30E-06 |
| TLK1     | 2q31.1            | 0.262798 | 1.87E-07 | 1.30E-06 |
| RASGRP1  | 15q14             | 0.262763 | 1.88E-07 | 1.31E-06 |
| SSPN     | 12p12.1           | 0.262759 | 1.88E-07 | 1.31E-06 |
| SORCS1   | 10q25.1           | 0.262724 | 1.89E-07 | 1.31E-06 |
| FTL      | 19q13.33          | -0.26272 | 1.89E-07 | 1.31E-06 |
| ADAMTS12 | 5p13.3-p13.2      | 0.262716 | 1.89E-07 | 1.31E-06 |
| GALNT3   | 2q24.3            | 0.26266  | 1.90E-07 | 1.32E-06 |
| FARSA    | 19p13.13          | -0.26264 | 1.91E-07 | 1.32E-06 |
| RECQL5   | 17q25.1           | -0.26262 | 1.91E-07 | 1.32E-06 |
| FBXO34   | 14q22.3           | 0.262592 | 1.92E-07 | 1.33E-06 |
| DTNB     | 2p23.3            | -0.26253 | 1.93E-07 | 1.34E-06 |
| ZDHHC21  | 9p22.3            | 0.262525 | 1.93E-07 | 1.34E-06 |
| PHF5A    | 22q13.2           | -0.26252 | 1.93E-07 | 1.34E-06 |
| SCFD1    | 14q12             | 0.262483 | 1.94E-07 | 1.34E-06 |
| LTBP4    | 19q13.2           | 0.262464 | 1.94E-07 | 1.34E-06 |

|           |                 |          |          |          |
|-----------|-----------------|----------|----------|----------|
| RPL12     | 9q33.3          | -0.26243 | 1.95E-07 | 1.35E-06 |
| CHCHD3    | 7q32.3-q33      | -0.26242 | 1.95E-07 | 1.35E-06 |
| POLH      | 6p21.1          | 0.262367 | 1.97E-07 | 1.36E-06 |
| ENGASE    | 17q25.3         | -0.26235 | 1.97E-07 | 1.36E-06 |
| SLC30A6   | 2p22.3          | 0.262346 | 1.97E-07 | 1.36E-06 |
| SUFU      | 10q24.32        | 0.262344 | 1.97E-07 | 1.36E-06 |
| PPIP5K2   | 5q21.1          | 0.262331 | 1.97E-07 | 1.36E-06 |
| SDF2L1    | 22q11.21        | -0.26229 | 1.98E-07 | 1.37E-06 |
| GAN       | 16q23.2         | 0.262293 | 1.98E-07 | 1.37E-06 |
| XPR1      | 1q25.3          | 0.262207 | 2.00E-07 | 1.38E-06 |
| CEP192    | 18p11.21        | 0.262163 | 2.01E-07 | 1.38E-06 |
| TPT1-AS1  | 13q14.13        | -0.26215 | 2.01E-07 | 1.39E-06 |
| NDUFB1    | 14q32.12        | -0.26195 | 2.06E-07 | 1.42E-06 |
| RNF150    | 4q31.21         | 0.261944 | 2.06E-07 | 1.42E-06 |
| CDYL2     | 16q23.2         | 0.261839 | 2.08E-07 | 1.43E-06 |
| SNTB2     | 16q22.1         | 0.261824 | 2.09E-07 | 1.44E-06 |
| LINC01558 | 6q27            | -0.26182 | 2.09E-07 | 1.44E-06 |
| TRAPPC2   | Xp22.2          | -0.2618  | 2.09E-07 | 1.44E-06 |
| CEMIP     | 15q25.1         | 0.261752 | 2.10E-07 | 1.45E-06 |
| RUVBL1    | 3q21.3          | -0.26174 | 2.11E-07 | 1.45E-06 |
| TIGD1     | 2q37.1          | -0.26168 | 2.12E-07 | 1.46E-06 |
| FBN1      | 15q21.1         | 0.261672 | 2.12E-07 | 1.46E-06 |
| KDM6A     | Xp11.3          | 0.261623 | 2.13E-07 | 1.46E-06 |
| CTR9      | 11p15.4         | 0.261612 | 2.14E-07 | 1.47E-06 |
| LCMT1     | 16p12.1         | -0.26161 | 2.14E-07 | 1.47E-06 |
| EMC10     | 19q13.33        | -0.2616  | 2.14E-07 | 1.47E-06 |
| CNOT6     | 5q35.3          | 0.261564 | 2.15E-07 | 1.47E-06 |
| PIAS2     | 18q21.1         | 0.261558 | 2.15E-07 | 1.47E-06 |
| SNAPC4    | 9q34.3          | -0.26154 | 2.15E-07 | 1.47E-06 |
| AFDN-DT   | 6q27            | -0.26149 | 2.17E-07 | 1.48E-06 |
| KITLG     | 12q21.32        | 0.261451 | 2.18E-07 | 1.49E-06 |
| MBP       | 18q23           | 0.261334 | 2.20E-07 | 1.51E-06 |
| CAMK4     | 5q22.1          | 0.261312 | 2.21E-07 | 1.51E-06 |
| KSR2      | 12q24.22-q24.23 | 0.261263 | 2.22E-07 | 1.52E-06 |
| ESR1      | 6q25.1-q25.2    | 0.261244 | 2.23E-07 | 1.52E-06 |
| YBX2      | 17p13.1         | -0.26124 | 2.23E-07 | 1.52E-06 |
| COPS2     | 15q21.1         | 0.261239 | 2.23E-07 | 1.52E-06 |
| SP3       | 2q31.1          | 0.261199 | 2.24E-07 | 1.53E-06 |
| DLG1      | 3q29            | 0.261196 | 2.24E-07 | 1.53E-06 |
| METTL14   | 4q26            | 0.261105 | 2.26E-07 | 1.54E-06 |
| SFMBT1    | 3p21.1          | 0.261104 | 2.26E-07 | 1.54E-06 |
| VMA21     | Xq28            | -0.26107 | 2.27E-07 | 1.55E-06 |
| STX16     | 20q13.32        | -0.26104 | 2.27E-07 | 1.55E-06 |
| PIAS3     | 1q21.1          | 0.26103  | 2.28E-07 | 1.55E-06 |
| AGAP4     | 10q11.22        | -0.26102 | 2.28E-07 | 1.55E-06 |
| SPSB3     | 16p13.3         | -0.26099 | 2.29E-07 | 1.56E-06 |
| TMEM71    | 8q24.22         | 0.260991 | 2.29E-07 | 1.56E-06 |
| DUOX1     | 15q21.1         | 0.260986 | 2.29E-07 | 1.56E-06 |
| ZNF580    | 19q13.42        | -0.26096 | 2.30E-07 | 1.56E-06 |
| F2R       | 5q13.3          | 0.260943 | 2.30E-07 | 1.56E-06 |
| EPAS1     | 2p21            | 0.260932 | 2.30E-07 | 1.56E-06 |
| RO60      | 1q31.2          | 0.260848 | 2.32E-07 | 1.58E-06 |
| KLHL14    | 18q12.1         | 0.260844 | 2.33E-07 | 1.58E-06 |
| FLAD1     | 1q21.3          | -0.26076 | 2.35E-07 | 1.59E-06 |
| NKAPD1    | 11q23.1         | -0.26071 | 2.36E-07 | 1.60E-06 |
| CYLD      | 16q12.1         | 0.260713 | 2.36E-07 | 1.60E-06 |
| IPCEF1    | 6q25.2          | 0.260709 | 2.36E-07 | 1.60E-06 |
| C1ORF50   | 1p34.2          | -0.2607  | 2.36E-07 | 1.60E-06 |

|           |                |          |          |          |
|-----------|----------------|----------|----------|----------|
| ACTL10    | 20q11.22       | -0.26066 | 2.37E-07 | 1.61E-06 |
| SRSF2     | 17q25.1        | -0.26066 | 2.37E-07 | 1.61E-06 |
| PLEKHA7   | 11p15.2-p15.1  | 0.260649 | 2.38E-07 | 1.61E-06 |
| CHRNA7    | 15q13.3        | 0.26059  | 2.39E-07 | 1.62E-06 |
| SIDT1     | 3q13.2         | 0.260588 | 2.39E-07 | 1.62E-06 |
| PDS5A     | 4p14           | 0.260532 | 2.41E-07 | 1.63E-06 |
| DCAKD     | 17q21.31       | -0.2605  | 2.41E-07 | 1.63E-06 |
| TTC39B    | 9p22.3         | 0.26049  | 2.42E-07 | 1.63E-06 |
| CUEDC2    | 10q24.32       | -0.26047 | 2.42E-07 | 1.64E-06 |
| TMEM175   | 4p16.3         | -0.26044 | 2.43E-07 | 1.64E-06 |
| NBR1      | 17q21.31       | 0.260366 | 2.45E-07 | 1.65E-06 |
| GAS5      | 1q25.1         | -0.26035 | 2.45E-07 | 1.66E-06 |
| PSMB8     | 6p21.32        | -0.2603  | 2.47E-07 | 1.67E-06 |
| ARHGAP11A | 15q13.3        | 0.260238 | 2.49E-07 | 1.68E-06 |
| MTUS2     | 13q12.3        | 0.260209 | 2.49E-07 | 1.68E-06 |
| SGF29     | 16p11.2        | -0.26021 | 2.49E-07 | 1.68E-06 |
| LSM3      | 3p25.1         | -0.26021 | 2.49E-07 | 1.68E-06 |
| MAPK15    | -              | -0.26018 | 2.50E-07 | 1.68E-06 |
| TNNI3     | 19q13.42       | -0.26016 | 2.51E-07 | 1.69E-06 |
| C9ORF64   | 9q21.32        | 0.260074 | 2.53E-07 | 1.70E-06 |
| KIF5B     | 10p11.22       | 0.260037 | 2.54E-07 | 1.71E-06 |
| NCKAP1L   | 12q13.13-q13.2 | 0.260031 | 2.54E-07 | 1.71E-06 |
| TERC      | 3q26.2         | -0.25998 | 2.56E-07 | 1.72E-06 |
| ENTPD5    | 14q24.3        | 0.259981 | 2.56E-07 | 1.72E-06 |
| ZNF516    | 18q23          | 0.259975 | 2.56E-07 | 1.72E-06 |
| AKAP10    | 17p11.2        | 0.259917 | 2.57E-07 | 1.73E-06 |
| RNF213    | 17q25.3        | 0.259865 | 2.59E-07 | 1.74E-06 |
| SNHG7     | 9q34.3         | -0.25986 | 2.59E-07 | 1.74E-06 |
| SORL1     | 11q24.1        | 0.259861 | 2.59E-07 | 1.74E-06 |
| SUGT1     | 13q14.3        | -0.25976 | 2.62E-07 | 1.76E-06 |
| SNORA57   | 11q12.3        | -0.25969 | 2.64E-07 | 1.77E-06 |
| CDT1      | 16q24.3        | -0.25965 | 2.65E-07 | 1.78E-06 |
| FGFR2     | 10q26.13       | 0.259639 | 2.65E-07 | 1.78E-06 |
| BTBD9     | 6p21.2         | 0.259551 | 2.68E-07 | 1.80E-06 |
| RITA1     | 12q24.13       | -0.25955 | 2.68E-07 | 1.80E-06 |
| PDCL3     | 2q11.2         | -0.2595  | 2.70E-07 | 1.80E-06 |
| RNF2      | 1q25.3         | 0.259451 | 2.71E-07 | 1.81E-06 |
| FMOD      | 1q32.1         | 0.259443 | 2.71E-07 | 1.81E-06 |
| DDX41     | 5q35.3         | -0.25943 | 2.71E-07 | 1.82E-06 |
| NAXD      | 13q34          | -0.25942 | 2.72E-07 | 1.82E-06 |
| PILRB     | 7q22.1         | -0.2594  | 2.72E-07 | 1.82E-06 |
| USP47     | 11p15.3        | 0.259377 | 2.73E-07 | 1.82E-06 |
| C2ORF88   | 2q32.2         | 0.259376 | 2.73E-07 | 1.82E-06 |
| APOBR     | 16p12.1        | 0.259371 | 2.73E-07 | 1.83E-06 |
| TMEM246   | 9q31.1         | 0.259367 | 2.73E-07 | 1.83E-06 |
| HIPK2     | 7q34           | 0.259325 | 2.75E-07 | 1.83E-06 |
| SNORA8    | 11q21          | -0.25931 | 2.75E-07 | 1.84E-06 |
| SYNPO     | 5q33.1         | 0.259301 | 2.75E-07 | 1.84E-06 |
| DNAH2     | 17p13.1        | 0.259295 | 2.76E-07 | 1.84E-06 |
| CPA3      | 3q24           | 0.259281 | 2.76E-07 | 1.84E-06 |
| NPY6R     | 5q31.2         | 0.259266 | 2.76E-07 | 1.84E-06 |
| CPM       | 12q15          | 0.259219 | 2.78E-07 | 1.85E-06 |
| KIT       | 4q12           | 0.2592   | 2.78E-07 | 1.85E-06 |
| PIK3C2A   | 11p15.1        | 0.25916  | 2.80E-07 | 1.86E-06 |
| IQCC      | 1p35.2         | -0.2591  | 2.82E-07 | 1.87E-06 |
| TP53INP1  | 8q22.1         | 0.258982 | 2.85E-07 | 1.90E-06 |
| C3ORF70   | 3q27.2         | 0.258959 | 2.86E-07 | 1.90E-06 |
| AGPS      | 2q31.2         | 0.258955 | 2.86E-07 | 1.90E-06 |

|          |                 |          |          |          |
|----------|-----------------|----------|----------|----------|
| KIRREL3  | 11q24.2         | 0.258929 | 2.87E-07 | 1.91E-06 |
| DLEU1    | 13q14.2-q14.3   | -0.25893 | 2.87E-07 | 1.91E-06 |
| MAP4     | 3p21.31         | 0.258917 | 2.87E-07 | 1.91E-06 |
| PPIF     | 10q22.3         | -0.25887 | 2.89E-07 | 1.92E-06 |
| TBCA     | 5q14.1          | -0.2588  | 2.91E-07 | 1.93E-06 |
| THSD7A   | 7p21.3          | 0.258708 | 2.94E-07 | 1.95E-06 |
| UBE3B    | 12q24.11        | 0.258701 | 2.94E-07 | 1.95E-06 |
| PRKCB    | 16p12.2-p12.1   | 0.258664 | 2.95E-07 | 1.96E-06 |
| BASP1    | 5p15.1          | 0.258661 | 2.95E-07 | 1.96E-06 |
| NUP133   | 1q42.13         | 0.258651 | 2.96E-07 | 1.96E-06 |
| RBP2     | 3q23            | -0.25864 | 2.96E-07 | 1.96E-06 |
| SLC35E3  | 12q15           | 0.258627 | 2.96E-07 | 1.96E-06 |
| WDFY4    | 10q11.23        | 0.258579 | 2.98E-07 | 1.97E-06 |
| ADCK1    | 14q24.3         | -0.25853 | 2.99E-07 | 1.98E-06 |
| FAM193B  | 5q35.3          | -0.25853 | 3.00E-07 | 1.98E-06 |
| LTBP1    | 2p22.3          | 0.258526 | 3.00E-07 | 1.98E-06 |
| RSPH14   | 22q11.22-q11.23 | -0.25849 | 3.01E-07 | 1.99E-06 |
| VGLL3    | 3p12.1          | 0.258469 | 3.02E-07 | 1.99E-06 |
| MAN2B2   | 4p16.1          | 0.258467 | 3.02E-07 | 1.99E-06 |
| GAS7     | 17p13.1         | 0.258447 | 3.02E-07 | 2.00E-06 |
| TEFM     | 17q11.2         | -0.25838 | 3.04E-07 | 2.01E-06 |
| CCDC51   | 3p21.31         | -0.25829 | 3.07E-07 | 2.03E-06 |
| ERBIN    | 5q12.3          | 0.258285 | 3.08E-07 | 2.03E-06 |
| ACCS     | 11p11.2         | -0.25827 | 3.08E-07 | 2.03E-06 |
| MXD1     | 2p13.3          | 0.258238 | 3.09E-07 | 2.04E-06 |
| ITPR1    | 3p26.1          | 0.258235 | 3.09E-07 | 2.04E-06 |
| CDC16    | 13q34           | -0.25822 | 3.10E-07 | 2.04E-06 |
| HSPBAP1  | 3q21.1          | -0.2582  | 3.10E-07 | 2.04E-06 |
| C8ORF76  | 8q24.13         | -0.25808 | 3.14E-07 | 2.07E-06 |
| KRT10    | 17q21.2         | -0.25805 | 3.16E-07 | 2.08E-06 |
| STYK1    | 12p13.2         | 0.257979 | 3.18E-07 | 2.09E-06 |
| TRAF2    | 9q34.3          | -0.25797 | 3.18E-07 | 2.09E-06 |
| EPS8     | 12p12.3         | 0.257972 | 3.18E-07 | 2.09E-06 |
| SLC25A15 | 13q14.11        | -0.25794 | 3.19E-07 | 2.10E-06 |
| POU2AF1  | 11q23.1         | 0.257925 | 3.20E-07 | 2.10E-06 |
| FAXDC2   | 5q33.2          | 0.257883 | 3.21E-07 | 2.11E-06 |
| RNF32    | 7q36.3          | -0.25787 | 3.22E-07 | 2.11E-06 |
| PNKP     | 19q13.33        | -0.25781 | 3.24E-07 | 2.13E-06 |
| GAS2     | 11p14.3         | -0.25778 | 3.25E-07 | 2.13E-06 |
| RPL13AP3 | 14q22.3         | -0.25773 | 3.27E-07 | 2.14E-06 |
| APOO     | Xp22.11         | -0.25772 | 3.27E-07 | 2.14E-06 |
| ATP5MPL  | 14q32.33        | -0.25771 | 3.27E-07 | 2.15E-06 |
| TBC1D8B  | Xq22.3          | 0.257681 | 3.29E-07 | 2.15E-06 |
| PMS2P5   | 7q11.23         | -0.25766 | 3.29E-07 | 2.16E-06 |
| PDE10A   | 6q27            | 0.257605 | 3.31E-07 | 2.17E-06 |
| TRIB2    | 2p24.3          | 0.257583 | 3.32E-07 | 2.17E-06 |
| HINT2    | 9p13.3          | -0.25758 | 3.32E-07 | 2.17E-06 |
| WDR75    | 2q32.2          | -0.25756 | 3.33E-07 | 2.18E-06 |
| MSANTD1  | 4p16.3          | -0.25749 | 3.36E-07 | 2.19E-06 |
| MAPK13   | 6p21.31         | -0.25747 | 3.36E-07 | 2.20E-06 |
| ATP8A1   | 4p13            | 0.257256 | 3.44E-07 | 2.25E-06 |
| LRP5L    | 22q11.23        | -0.25716 | 3.48E-07 | 2.27E-06 |
| SEMA3D   | 7q21.11         | 0.257148 | 3.48E-07 | 2.27E-06 |
| MYORG    | 9p13.3          | 0.257066 | 3.51E-07 | 2.29E-06 |
| FAM135A  | 6q13            | 0.25701  | 3.53E-07 | 2.31E-06 |
| ENTPD6   | 20p11.21        | -0.257   | 3.54E-07 | 2.31E-06 |
| ATXN7L1  | 7q22.3          | 0.256995 | 3.54E-07 | 2.31E-06 |
| DSTYK    | 1q32.1          | 0.256961 | 3.55E-07 | 2.32E-06 |



|             |               |          |          |          |
|-------------|---------------|----------|----------|----------|
| ADGRF1      | 6p12.3 6      | 0.256958 | 3.55E-07 | 2.32E-06 |
| LRP3        | 19q13.11      | -0.25695 | 3.56E-07 | 2.32E-06 |
| ZHX1        | 8q24.13       | 0.256926 | 3.56E-07 | 2.32E-06 |
| INPP5F      | 10q26.11      | 0.256901 | 3.57E-07 | 2.33E-06 |
| RSL1D1      | 16p13.13      | -0.2569  | 3.58E-07 | 2.33E-06 |
| KAT8        | 16p11.2       | -0.25687 | 3.59E-07 | 2.33E-06 |
| REXO4       | 9q34.2        | -0.25686 | 3.59E-07 | 2.34E-06 |
| RIMBP3      | 22q11.21      | 0.256752 | 3.63E-07 | 2.36E-06 |
| TBC1D12     | 10q23.33      | 0.256726 | 3.64E-07 | 2.37E-06 |
| PPP2CB      | 8p12          | 0.256705 | 3.65E-07 | 2.37E-06 |
| SH2B2       | 7q22.1        | -0.2567  | 3.65E-07 | 2.37E-06 |
| ZFXH3       | 16q22.2-q22.3 | 0.256668 | 3.67E-07 | 2.38E-06 |
| SENP7       | 3q12.3        | 0.256662 | 3.67E-07 | 2.38E-06 |
| C11ORF1     | 11q23.1       | -0.25662 | 3.68E-07 | 2.39E-06 |
| SLC49A4     | 3q21.1        | 0.256613 | 3.69E-07 | 2.39E-06 |
| NPC1        | 18q11.2       | 0.256576 | 3.70E-07 | 2.40E-06 |
| DPEP1       | 16q24.3       | -0.25656 | 3.71E-07 | 2.41E-06 |
| CHRFAM7A    | 15q13.2       | 0.256477 | 3.74E-07 | 2.43E-06 |
| ESD         | 13q14.2       | -0.25644 | 3.76E-07 | 2.44E-06 |
| AMPD1       | 1p13.2        | 0.256427 | 3.76E-07 | 2.44E-06 |
| SH3D19      | 4q31.3        | 0.256408 | 3.77E-07 | 2.44E-06 |
| NET1        | 10p15.1       | 0.256376 | 3.78E-07 | 2.45E-06 |
| GLRX3       | 10q26.3       | -0.25631 | 3.81E-07 | 2.47E-06 |
| C1ORF116    | 1q32.1        | 0.256268 | 3.83E-07 | 2.48E-06 |
| MGST2       | 4q31.1        | -0.25626 | 3.83E-07 | 2.48E-06 |
| ETFA        | 15q24.2-q24.3 | 0.256221 | 3.85E-07 | 2.49E-06 |
| UBE3D       | 6q14.1        | -0.2562  | 3.85E-07 | 2.49E-06 |
| MRPL37      | 1p32.3        | -0.25619 | 3.86E-07 | 2.49E-06 |
| SETD4       | 21q22.12      | -0.25611 | 3.89E-07 | 2.51E-06 |
| FCGBP       | 19q13.2       | 0.256111 | 3.89E-07 | 2.51E-06 |
| AGK         | 7q34          | -0.25608 | 3.90E-07 | 2.52E-06 |
| LOC148696   | 1q32.2        | 0.256074 | 3.91E-07 | 2.52E-06 |
| C11ORF71    | 11q23.2       | -0.25606 | 3.91E-07 | 2.53E-06 |
| MAP4K4      | 2q11.2        | 0.256041 | 3.92E-07 | 2.53E-06 |
| CTNNA1      | 5q31.2        | 0.255925 | 3.97E-07 | 2.56E-06 |
| METTL23     | 17q25.1       | -0.25591 | 3.98E-07 | 2.56E-06 |
| EID1        | 15q21.1       | 0.255906 | 3.98E-07 | 2.56E-06 |
| AATF        | 17q12         | -0.25585 | 4.00E-07 | 2.58E-06 |
| WASHC3      | 12q23.2       | -0.25583 | 4.01E-07 | 2.58E-06 |
| UFL1        | 6q16.1        | 0.255801 | 4.03E-07 | 2.59E-06 |
| NOL3        | 16q22.1       | -0.25578 | 4.03E-07 | 2.60E-06 |
| BICC1       | 10q21.1       | 0.255739 | 4.05E-07 | 2.61E-06 |
| JAK2        | 9p24.1        | 0.25567  | 4.08E-07 | 2.63E-06 |
| B3GALT5-AS1 | 21q22.2       | 0.255605 | 4.11E-07 | 2.64E-06 |
| APOOL       | Xq21.1        | 0.255602 | 4.11E-07 | 2.64E-06 |
| HDDC2       | 6q22.31       | -0.25558 | 4.12E-07 | 2.65E-06 |
| SRCAP       | 16p11.2       | 0.255544 | 4.14E-07 | 2.66E-06 |
| CCDC68      | 18q21.2       | 0.255453 | 4.18E-07 | 2.68E-06 |
| ARHGAP32    | 11q24.3       | 0.255453 | 4.18E-07 | 2.68E-06 |
| SATB1       | 3p24.3        | 0.255384 | 4.21E-07 | 2.70E-06 |
| JCHAIN      | 4q13.3        | 0.255368 | 4.22E-07 | 2.71E-06 |
| TSHZ3       | 19q12         | 0.25536  | 4.22E-07 | 2.71E-06 |
| RASSF5      | 1q32.1        | 0.255338 | 4.23E-07 | 2.71E-06 |
| RRAGC       | 1p34.3        | 0.255322 | 4.24E-07 | 2.72E-06 |
| ZNF689      | 16p11.2       | 0.255321 | 4.24E-07 | 2.72E-06 |
| DNAJB4      | 1p31.1        | 0.255304 | 4.25E-07 | 2.72E-06 |
| NAGPA       | 16p13.3       | -0.2553  | 4.25E-07 | 2.72E-06 |
| FANCF       | 11p14.3       | -0.25529 | 4.25E-07 | 2.72E-06 |

|              |                 |          |          |          |
|--------------|-----------------|----------|----------|----------|
| HSD17B3      | 9q22.32         | -0.25523 | 4.28E-07 | 2.74E-06 |
| EHD4         | 15q15.1         | 0.255199 | 4.29E-07 | 2.75E-06 |
| GID8         | 20q13.33        | -0.25519 | 4.30E-07 | 2.75E-06 |
| PTPRM        | 18p11.23        | 0.25519  | 4.30E-07 | 2.75E-06 |
| FAS          | 10q23.31        | 0.255174 | 4.31E-07 | 2.75E-06 |
| ZNF771       | 16p11.2         | -0.25514 | 4.32E-07 | 2.76E-06 |
| SPATA6       | 1p33            | 0.255123 | 4.33E-07 | 2.76E-06 |
| TARBP2       | 12q13.13        | -0.2551  | 4.34E-07 | 2.77E-06 |
| TOGARAM1     | 14q21.2         | 0.255028 | 4.37E-07 | 2.79E-06 |
| AARSD1       | 17q21.31        | -0.25498 | 4.40E-07 | 2.80E-06 |
| CTAGE10P     | 13q14.2         | 0.25495  | 4.41E-07 | 2.81E-06 |
| KIF12        | 9q32            | -0.25495 | 4.41E-07 | 2.81E-06 |
| POLG2        | 17q23.3         | -0.25491 | 4.43E-07 | 2.82E-06 |
| MUC4         | 3q29            | 0.254907 | 4.43E-07 | 2.82E-06 |
| CCNI         | 4q21.1          | 0.254902 | 4.43E-07 | 2.82E-06 |
| YIF1B        | 19q13.2         | -0.25489 | 4.44E-07 | 2.83E-06 |
| WDR37        | 10p15.3         | 0.254871 | 4.45E-07 | 2.83E-06 |
| NDST1        | 5q33.1          | 0.254865 | 4.45E-07 | 2.83E-06 |
| LTBP2        | 14q24.3         | 0.254834 | 4.47E-07 | 2.84E-06 |
| H2AFJ        | 12p12.3         | -0.2548  | 4.48E-07 | 2.85E-06 |
| ATP1B1       | 1q24.2          | 0.254776 | 4.49E-07 | 2.86E-06 |
| CGREF1       | 2p23.3          | -0.25476 | 4.50E-07 | 2.86E-06 |
| CDCP1        | 3p21.31         | 0.254687 | 4.54E-07 | 2.88E-06 |
| LOC100130987 | 11q13.2         | -0.25468 | 4.54E-07 | 2.88E-06 |
| GRTP1        | 13q34           | -0.25463 | 4.56E-07 | 2.90E-06 |
| PDXDC1       | 16p13.11        | 0.254614 | 4.57E-07 | 2.90E-06 |
| SART1        | 11q13.1         | -0.25461 | 4.58E-07 | 2.90E-06 |
| TSPAN3       | 15q24.3         | 0.254573 | 4.59E-07 | 2.91E-06 |
| ADCY9        | 16p13.3         | 0.254568 | 4.59E-07 | 2.91E-06 |
| VMP1         | 17q23.1         | -0.25454 | 4.61E-07 | 2.92E-06 |
| RGS7BP       | 5q12.3          | 0.254406 | 4.68E-07 | 2.96E-06 |
| RBMS2        | 12q13.3         | 0.254395 | 4.68E-07 | 2.97E-06 |
| CCT6A        | 7p11.2          | -0.25438 | 4.69E-07 | 2.97E-06 |
| KRTCAP3      | 2p23.3          | -0.25436 | 4.70E-07 | 2.97E-06 |
| ARL15        | 5q11.2          | 0.254354 | 4.70E-07 | 2.98E-06 |
| TECR         | 19p13.12        | -0.25435 | 4.70E-07 | 2.98E-06 |
| CBX3         | 7p15.2          | -0.25428 | 4.74E-07 | 3.00E-06 |
| CSF2RB       | 22q12.3         | 0.254199 | 4.78E-07 | 3.02E-06 |
| PPFIA2       | 12q21.31        | 0.254196 | 4.78E-07 | 3.02E-06 |
| KIAA0895L    | 16q22.1         | -0.25417 | 4.80E-07 | 3.03E-06 |
| ARHGAP25     | 2p13.3          | 0.254019 | 4.87E-07 | 3.08E-06 |
| TANK         | 2q24.2          | 0.254014 | 4.88E-07 | 3.08E-06 |
| ZNF335       | 20q13.12        | -0.25401 | 4.88E-07 | 3.08E-06 |
| DHDH         | 19q13.33        | -0.254   | 4.88E-07 | 3.08E-06 |
| ELMOD3       | 2p11.2          | -0.25397 | 4.90E-07 | 3.09E-06 |
| CUX2         | 12q24.11-q24.12 | 0.253939 | 4.91E-07 | 3.10E-06 |
| ATP6V1C2     | -               | -0.25387 | 4.95E-07 | 3.12E-06 |
| RPS23        | 5q14.2          | -0.25385 | 4.96E-07 | 3.13E-06 |
| IKZF3        | 17q12-q21.1     | 0.253815 | 4.98E-07 | 3.14E-06 |
| BABAM2       | 2p23.2          | -0.2538  | 4.99E-07 | 3.14E-06 |
| PA2G4        | 12q13.2         | -0.25379 | 5.00E-07 | 3.15E-06 |
| ORMDL1       | 2q32.2          | -0.25376 | 5.01E-07 | 3.15E-06 |
| MOGS         | 2p13.1          | -0.25376 | 5.01E-07 | 3.15E-06 |
| NAPRT        | 8q24.3          | -0.25374 | 5.02E-07 | 3.16E-06 |
| OSBPL11      | 3q21.2          | 0.253699 | 5.04E-07 | 3.17E-06 |
| KCNN3        | 1q21.3          | 0.253691 | 5.05E-07 | 3.17E-06 |
| FHIT         | 3p14.2          | -0.25368 | 5.05E-07 | 3.17E-06 |
| GPX2         | 14q23.3         | -0.25368 | 5.05E-07 | 3.17E-06 |

|              |                     |          |          |          |
|--------------|---------------------|----------|----------|----------|
| ADA          | 20q13.12            | -0.25358 | 5.11E-07 | 3.21E-06 |
| RBM28        | 7q32.1              | -0.25355 | 5.12E-07 | 3.22E-06 |
| MAPK8        | 10q11.22            | 0.253498 | 5.15E-07 | 3.23E-06 |
| PHLDA1       | 12q21.2             | 0.253494 | 5.15E-07 | 3.23E-06 |
| PLA2G4D      | 15q15.1             | 0.253486 | 5.16E-07 | 3.24E-06 |
| VWA3B        | 2q11.2              | 0.253461 | 5.17E-07 | 3.24E-06 |
| SORT1        | 1p13.3 1p21.3-p13.1 | 0.253458 | 5.17E-07 | 3.24E-06 |
| ACSL3        | 2q36.1              | 0.253418 | 5.20E-07 | 3.26E-06 |
| ZNF831       | 20q13.32            | 0.253357 | 5.23E-07 | 3.28E-06 |
| CKMT2        | 5q14.1              | -0.25335 | 5.23E-07 | 3.28E-06 |
| CD226        | 18q22.2             | 0.253324 | 5.25E-07 | 3.29E-06 |
| OXCT1        | 5p13.1              | 0.253315 | 5.25E-07 | 3.29E-06 |
| CCDC149      | 4p15.2              | 0.253307 | 5.26E-07 | 3.29E-06 |
| ZNF687       | 1q21.3              | 0.253306 | 5.26E-07 | 3.29E-06 |
| G2E3         | 14q12               | 0.253235 | 5.30E-07 | 3.31E-06 |
| AGAP6        | 10q11.23            | -0.2532  | 5.32E-07 | 3.32E-06 |
| TECPR2       | 14q32.31            | 0.253155 | 5.34E-07 | 3.34E-06 |
| ST5          | 11p15.4             | 0.253126 | 5.36E-07 | 3.35E-06 |
| EMP1         | 12p13.1             | 0.253084 | 5.38E-07 | 3.36E-06 |
| TRMT1L       | 1q25.3              | 0.253079 | 5.39E-07 | 3.36E-06 |
| MYSM1        | 1p32.1              | 0.25295  | 5.46E-07 | 3.41E-06 |
| SUCO         | 1q24.3              | 0.252933 | 5.47E-07 | 3.41E-06 |
| DDX27        | 20q13.13            | -0.25291 | 5.48E-07 | 3.42E-06 |
| PMM2         | 16p13.2             | -0.25288 | 5.50E-07 | 3.43E-06 |
| ZDHHC12      | 9q34.11             | -0.25287 | 5.51E-07 | 3.43E-06 |
| SMIM20       | 4p15.2              | -0.25284 | 5.52E-07 | 3.44E-06 |
| WWP1         | 8q21.3              | 0.252837 | 5.53E-07 | 3.44E-06 |
| GUSBP11      | 22q11.23            | -0.25274 | 5.59E-07 | 3.48E-06 |
| NOL10        | 2p25.1              | -0.25273 | 5.59E-07 | 3.48E-06 |
| PLD6         | 17p11.2             | -0.25272 | 5.60E-07 | 3.48E-06 |
| TMTC1        | 12p11.22            | 0.252656 | 5.63E-07 | 3.51E-06 |
| MIS18BP1     | 14q21.2             | 0.252623 | 5.65E-07 | 3.52E-06 |
| RPL13AP20    | 12p13.1             | -0.25261 | 5.66E-07 | 3.52E-06 |
| UBE2MP1      | 16p11.2             | -0.25261 | 5.66E-07 | 3.52E-06 |
| ATRN         | 20p13               | 0.252591 | 5.67E-07 | 3.53E-06 |
| SCAMP4       | 19p13.3             | -0.25259 | 5.68E-07 | 3.53E-06 |
| WBP1         | 2p13.1              | -0.25258 | 5.68E-07 | 3.53E-06 |
| HGS          | 17q25.3             | -0.25256 | 5.69E-07 | 3.54E-06 |
| HPDL         | 1p34.1              | -0.25254 | 5.70E-07 | 3.54E-06 |
| OXSRI        | 3p22.2              | 0.252527 | 5.71E-07 | 3.55E-06 |
| ZEB2         | 2q22.3              | 0.252486 | 5.74E-07 | 3.56E-06 |
| IFT52        | 20q13.12            | -0.25238 | 5.80E-07 | 3.60E-06 |
| GS1-124K5.11 | 7q11.21             | -0.25238 | 5.80E-07 | 3.60E-06 |
| DDX46        | 5q31.1              | 0.252373 | 5.81E-07 | 3.60E-06 |
| IL1R1        | 2q11.2-q12.1        | 0.252325 | 5.84E-07 | 3.62E-06 |
| NID2         | 14q22.1             | 0.252312 | 5.84E-07 | 3.62E-06 |
| CCT6P1       | 7q11.21             | -0.25231 | 5.85E-07 | 3.62E-06 |
| TMEM250      | 9q34.3              | -0.25227 | 5.87E-07 | 3.63E-06 |
| NEXMIF       | Xq13.3              | 0.252246 | 5.89E-07 | 3.64E-06 |
| PARM1        | 4q13.3              | 0.252179 | 5.93E-07 | 3.67E-06 |
| PXMP4        | 20q11.22            | -0.25215 | 5.95E-07 | 3.68E-06 |
| SERTAD2      | 2p14                | 0.252136 | 5.95E-07 | 3.68E-06 |
| TIAF1        | 17q11.2             | -0.2521  | 5.98E-07 | 3.69E-06 |
| IER5L        | 9q34.11             | -0.25209 | 5.99E-07 | 3.70E-06 |
| GUSBP4       | 6p11.2              | -0.25203 | 6.02E-07 | 3.72E-06 |
| AGPAT4       | 6q26                | 0.251904 | 6.10E-07 | 3.77E-06 |
| ARHGAP30     | 1q23.3              | 0.25184  | 6.14E-07 | 3.79E-06 |
| CDC14C       | 7p12.3              | 0.251838 | 6.15E-07 | 3.79E-06 |

|          |               |          |          |          |
|----------|---------------|----------|----------|----------|
| TOM1L2   | 17p11.2       | 0.251819 | 6.16E-07 | 3.80E-06 |
| SHPRH    | 6q24.3        | 0.251809 | 6.16E-07 | 3.80E-06 |
| ATXN3    | 14q32.12      | 0.251808 | 6.16E-07 | 3.80E-06 |
| CSNK2A2  | 16q21         | -0.25178 | 6.18E-07 | 3.81E-06 |
| ADAT3    | 19p13.3       | -0.25176 | 6.20E-07 | 3.82E-06 |
| PACC1    | 1q32.3        | -0.25172 | 6.22E-07 | 3.83E-06 |
| DMAC1    | 9p24.1        | -0.25172 | 6.22E-07 | 3.83E-06 |
| SIGLEC10 | 19q13.41      | 0.251696 | 6.24E-07 | 3.84E-06 |
| PDE4B    | 1p31.3        | 0.251683 | 6.25E-07 | 3.84E-06 |
| IPO9     | 1q32.1        | 0.251682 | 6.25E-07 | 3.84E-06 |
| ADIPOR1  | 1q32.1        | 0.251675 | 6.25E-07 | 3.85E-06 |
| ZNF706   | 8q22.3        | -0.25164 | 6.27E-07 | 3.86E-06 |
| TSNAXIP1 | 16q22.1       | -0.25158 | 6.32E-07 | 3.88E-06 |
| FAM53A   | 4p16.3        | -0.25152 | 6.35E-07 | 3.90E-06 |
| ETV6     | 12p13.2       | 0.251515 | 6.36E-07 | 3.91E-06 |
| FBF1     | 17q25.1       | -0.25151 | 6.36E-07 | 3.91E-06 |
| PPM1J    | 1p13.2        | -0.2515  | 6.37E-07 | 3.91E-06 |
| SOCS5    | 2p21          | 0.251443 | 6.41E-07 | 3.93E-06 |
| C2ORF68  | 2p11.2        | -0.25143 | 6.41E-07 | 3.93E-06 |
| RNF114   | 20q13.13      | -0.25142 | 6.42E-07 | 3.94E-06 |
| NUDT5    | 10p14         | -0.25139 | 6.44E-07 | 3.95E-06 |
| MARVELD1 | 10q24.2       | 0.251376 | 6.45E-07 | 3.96E-06 |
| CCR2     | 3p21.31       | 0.25132  | 6.49E-07 | 3.98E-06 |
| RORA     | 15q22.2       | 0.251295 | 6.51E-07 | 3.99E-06 |
| NOTUM    | 17q25.3       | -0.25117 | 6.59E-07 | 4.04E-06 |
| SEMA4A   | 1q22          | 0.251151 | 6.61E-07 | 4.05E-06 |
| TNNI3K   | 1p31.1        | 0.251108 | 6.64E-07 | 4.06E-06 |
| ZADH2    | 18q22.3       | 0.251084 | 6.66E-07 | 4.07E-06 |
| MSN      | Xq12          | 0.251052 | 6.68E-07 | 4.08E-06 |
| ABCF3    | 3q27.1        | -0.25097 | 6.73E-07 | 4.12E-06 |
| KCTD9    | 8p21.2        | 0.250954 | 6.75E-07 | 4.12E-06 |
| SLC38A1  | 12q13.11      | 0.250937 | 6.76E-07 | 4.13E-06 |
| AREL1    | 14q24.3       | 0.250888 | 6.79E-07 | 4.15E-06 |
| RAB21    | 12q21.1       | 0.250818 | 6.84E-07 | 4.18E-06 |
| TBC1D31  | 8q24.13       | -0.25079 | 6.87E-07 | 4.19E-06 |
| TUBA8    | 22q11.21      | -0.25076 | 6.89E-07 | 4.20E-06 |
| ANAPC5   | 12q24.31      | -0.25075 | 6.89E-07 | 4.21E-06 |
| C12ORF76 | 12q24.11      | -0.25073 | 6.91E-07 | 4.21E-06 |
| KCTD10   | 12q24.11      | 0.250698 | 6.93E-07 | 4.23E-06 |
| TPX2     | 20q11.21      | -0.25064 | 6.97E-07 | 4.25E-06 |
| HACD4    | 9p21.3        | 0.250644 | 6.97E-07 | 4.25E-06 |
| RHEB     | 7q36.1        | -0.25064 | 6.98E-07 | 4.25E-06 |
| FAM186A  | 12q13.12      | -0.25063 | 6.98E-07 | 4.25E-06 |
| NENF     | 1q32.3        | -0.25063 | 6.98E-07 | 4.25E-06 |
| PDCD6    | 5p15.33       | -0.25061 | 7.00E-07 | 4.26E-06 |
| EIF3H    | 8q23.3-q24.11 | -0.25056 | 7.03E-07 | 4.28E-06 |
| ADAT1    | 16q23.1       | 0.250556 | 7.04E-07 | 4.28E-06 |
| COPB2    | 3q23          | 0.250552 | 7.04E-07 | 4.28E-06 |
| MS4A2    | 11q12.1       | 0.250548 | 7.04E-07 | 4.28E-06 |
| NR4A2    | 2q24.1        | 0.250456 | 7.11E-07 | 4.32E-06 |
| NRDE2    | 14q32.11      | 0.250445 | 7.12E-07 | 4.32E-06 |
| CEBPA-DT | 19q13.11      | -0.25045 | 7.12E-07 | 4.32E-06 |
| C3ORF36  | 3q22.1        | 0.250445 | 7.12E-07 | 4.32E-06 |
| CDK3     | 17q25.1       | -0.25043 | 7.13E-07 | 4.33E-06 |
| CHST3    | 10q22.1       | 0.250381 | 7.17E-07 | 4.35E-06 |
| RCSD1    | 1q24.2        | 0.250075 | 7.40E-07 | 4.49E-06 |
| BCL2L2   | 14q11.2       | 0.250032 | 7.43E-07 | 4.51E-06 |
| PPP1R16B | 20q11.23      | 0.250007 | 7.45E-07 | 4.52E-06 |

|          |                 |          |          |          |
|----------|-----------------|----------|----------|----------|
| CD5      | 11q12.2         | 0.24998  | 7.48E-07 | 4.53E-06 |
| FAM71E1  | 19q13.33        | -0.24995 | 7.50E-07 | 4.54E-06 |
| PPP1R7   | 2q37.3          | -0.24992 | 7.53E-07 | 4.56E-06 |
| RIBC1    | Xp11.22         | -0.24991 | 7.53E-07 | 4.56E-06 |
| DPH5     | 1p21.2          | -0.2499  | 7.54E-07 | 4.56E-06 |
| ABRACL   | 6q24.1          | -0.24988 | 7.55E-07 | 4.57E-06 |
| FRRS1    | 1p21.2          | 0.249821 | 7.60E-07 | 4.60E-06 |
| PAK1IP1  | 6p24.2          | -0.24981 | 7.61E-07 | 4.60E-06 |
| KCTD17   | 22q12.3         | -0.24974 | 7.67E-07 | 4.64E-06 |
| ZFX      | Xp22.11         | 0.249687 | 7.71E-07 | 4.66E-06 |
| ZBTB6    | 9q33.2          | 0.249685 | 7.71E-07 | 4.66E-06 |
| BTK      | Xq22.1          | 0.249604 | 7.78E-07 | 4.70E-06 |
| SLC33A1  | 3q25.31         | 0.249513 | 7.85E-07 | 4.74E-06 |
| THSD1P1  | 13q14.3         | -0.2495  | 7.87E-07 | 4.75E-06 |
| HDHD5    | 22q11.1         | -0.24947 | 7.89E-07 | 4.76E-06 |
| CNTNAP3  | 9p12            | 0.249443 | 7.91E-07 | 4.77E-06 |
| TLR8     | Xp22.2          | 0.249439 | 7.91E-07 | 4.77E-06 |
| SIGLEC8  | 19q13.41        | 0.249406 | 7.94E-07 | 4.79E-06 |
| PRKCH    | 14q23.1         | 0.249386 | 7.96E-07 | 4.80E-06 |
| C15ORF39 | 15q24.2         | 0.249381 | 7.96E-07 | 4.80E-06 |
| DHPS     | 19p13.13        | -0.24936 | 7.97E-07 | 4.80E-06 |
| SH3GL1   | 19p13.3         | -0.24936 | 7.98E-07 | 4.80E-06 |
| CTBP1    | 4p16.3          | -0.2493  | 8.03E-07 | 4.83E-06 |
| CCNE1    | 19q12           | -0.24927 | 8.06E-07 | 4.85E-06 |
| ULK4P2   | 15q13.2         | 0.249236 | 8.08E-07 | 4.86E-06 |
| C6ORF52  | 6p24.2          | -0.24921 | 8.10E-07 | 4.87E-06 |
| UCK1     | 9q34.13         | -0.2492  | 8.11E-07 | 4.88E-06 |
| SH3PXD2B | 5q35.1          | 0.249123 | 8.18E-07 | 4.92E-06 |
| TRIM38   | 6p22.2          | 0.249096 | 8.20E-07 | 4.93E-06 |
| TPM4     | 19p13.12-p13.11 | 0.249073 | 8.22E-07 | 4.94E-06 |
| CENPA    | 2p23.3          | -0.24906 | 8.23E-07 | 4.94E-06 |
| KIAA2013 | 1p36.22         | -0.24905 | 8.24E-07 | 4.95E-06 |
| CRYM-AS1 | 16p12.2         | -0.24899 | 8.29E-07 | 4.98E-06 |
| SOX13    | 1q32.1          | 0.248973 | 8.31E-07 | 4.99E-06 |
| LYAR     | 4p16.3          | -0.24895 | 8.33E-07 | 5.00E-06 |
| MTCH1    | 6p21.2          | -0.24895 | 8.33E-07 | 5.00E-06 |
| ITGB3BP  | 1p31.3          | -0.24893 | 8.35E-07 | 5.01E-06 |
| PDZD7    | 10q24.31        | -0.24892 | 8.35E-07 | 5.01E-06 |
| NEFL     | 8p21.2          | 0.248907 | 8.37E-07 | 5.01E-06 |
| CSF1R    | 5q32            | 0.248882 | 8.39E-07 | 5.02E-06 |
| C16ORF54 | 16p11.2         | 0.248848 | 8.42E-07 | 5.04E-06 |
| EYS      | 6q12            | 0.248842 | 8.42E-07 | 5.04E-06 |
| RNF19A   | 8q22.2          | 0.248835 | 8.43E-07 | 5.04E-06 |
| FAHD2B   | 2q11.2          | -0.24883 | 8.43E-07 | 5.05E-06 |
| RNF144B  | 6p22.3          | 0.24868  | 8.57E-07 | 5.12E-06 |
| IL23R    | 1p31.3          | 0.248661 | 8.58E-07 | 5.13E-06 |
| MCF2L2   | 3q27.1          | 0.24863  | 8.61E-07 | 5.15E-06 |
| NAA20    | 20p11.23        | -0.2486  | 8.64E-07 | 5.16E-06 |
| PPME1    | 11q13.4         | -0.24852 | 8.71E-07 | 5.20E-06 |
| ASB8     | 12q13.11        | 0.248509 | 8.72E-07 | 5.21E-06 |
| GNL3     | 3p21.1          | -0.2485  | 8.73E-07 | 5.21E-06 |
| MORN2    | 2p22.1          | -0.24847 | 8.75E-07 | 5.22E-06 |
| PRUNE2   | 9q21.2          | 0.248414 | 8.81E-07 | 5.26E-06 |
| RCN2     | 15q24.3         | 0.248377 | 8.84E-07 | 5.27E-06 |
| TRIL     | 7p14.3          | 0.248347 | 8.87E-07 | 5.29E-06 |
| CCNB1IP1 | 14q11.2         | -0.24832 | 8.89E-07 | 5.30E-06 |
| PTPRF    | 1p34.2          | 0.248318 | 8.90E-07 | 5.30E-06 |
| HAUS5    | 19q13.12        | -0.24831 | 8.90E-07 | 5.31E-06 |

|           |               |          |          |          |
|-----------|---------------|----------|----------|----------|
| CNR1      | 6q15          | 0.248271 | 8.94E-07 | 5.33E-06 |
| NTRK2     | 9q21.33       | 0.248217 | 8.99E-07 | 5.35E-06 |
| ZNF513    | 2p23.3        | -0.24821 | 8.99E-07 | 5.35E-06 |
| IKBKG     | Xq28          | -0.24821 | 9.00E-07 | 5.36E-06 |
| TPRN      | 9q34.3        | -0.2482  | 9.01E-07 | 5.36E-06 |
| SEPTIN7P2 | 7p12.3        | -0.24816 | 9.04E-07 | 5.38E-06 |
| NR3C1     | 5q31.3        | 0.248103 | 9.10E-07 | 5.41E-06 |
| TTC9C     | 11q12.3       | -0.24808 | 9.12E-07 | 5.42E-06 |
| BEND4     | 4p13          | 0.248017 | 9.18E-07 | 5.45E-06 |
| TMEM18    | 2p25.3        | -0.24796 | 9.23E-07 | 5.49E-06 |
| RECQL     | 12p12.1       | 0.24794  | 9.25E-07 | 5.50E-06 |
| RAD54L    | 1p34.1        | -0.24793 | 9.27E-07 | 5.50E-06 |
| GINS2     | 16q24.1       | -0.24792 | 9.27E-07 | 5.50E-06 |
| UBN1      | 16p13.3       | 0.247905 | 9.29E-07 | 5.51E-06 |
| SSBP2     | 5q14.1        | 0.247895 | 9.30E-07 | 5.52E-06 |
| ERN1      | 17q23.3       | 0.247868 | 9.32E-07 | 5.53E-06 |
| MRPS18B   | 6p21.33       | -0.24776 | 9.43E-07 | 5.59E-06 |
| TCF4      | 18q21.2       | 0.2477   | 9.49E-07 | 5.62E-06 |
| WASH2P    | 2q14.1        | -0.2477  | 9.49E-07 | 5.62E-06 |
| ZNF707    | 8q24.3        | -0.24769 | 9.50E-07 | 5.63E-06 |
| MATR3     | 5q31.2        | 0.247605 | 9.58E-07 | 5.67E-06 |
| JPH4      | 14q11.2       | 0.247572 | 9.61E-07 | 5.69E-06 |
| SRSF7     | 2p22.1        | -0.24757 | 9.62E-07 | 5.69E-06 |
| BCL7B     | 7q11.23       | -0.2475  | 9.68E-07 | 5.73E-06 |
| TASOR2    | 10p15.1       | 0.247485 | 9.70E-07 | 5.74E-06 |
| EP400     | 12q24.33      | 0.247468 | 9.72E-07 | 5.75E-06 |
| VILL      | 3p22.2        | 0.247449 | 9.74E-07 | 5.76E-06 |
| ABHD14B   | 3p21.2        | -0.24743 | 9.75E-07 | 5.76E-06 |
| NOB1      | 16q22.1       | -0.24736 | 9.83E-07 | 5.81E-06 |
| SDHB      | 1p36.13       | -0.24735 | 9.84E-07 | 5.81E-06 |
| GTPBP3    | 19p13.11      | -0.24727 | 9.92E-07 | 5.86E-06 |
| NELFA     | 4p16.3        | -0.24726 | 9.93E-07 | 5.86E-06 |
| AMDHD2    | 16p13.3       | -0.24725 | 9.94E-07 | 5.87E-06 |
| NXPE2     | 11q23.2-q23.3 | 0.247242 | 9.95E-07 | 5.87E-06 |
| NLRP3     | 1q44          | 0.247217 | 9.98E-07 | 5.88E-06 |
| WDR76     | 15q15.3       | 0.247216 | 9.98E-07 | 5.88E-06 |
| SMDT1     | 22q13.2       | -0.24718 | 1.00E-06 | 5.90E-06 |
| CSE1L     | 20q13.13      | -0.24715 | 1.00E-06 | 5.92E-06 |
| COQ9      | 16q21         | -0.24711 | 1.01E-06 | 5.94E-06 |
| ETV4      | 17q21.31      | -0.24705 | 1.02E-06 | 5.98E-06 |
| CEBPA     | 19q13.11      | -0.24702 | 1.02E-06 | 5.99E-06 |
| FIGN      | 2q24.3        | 0.247004 | 1.02E-06 | 6.00E-06 |
| RPL13A    | 19q13.33      | -0.24693 | 1.03E-06 | 6.04E-06 |
| PRSS53    | 16p11.2       | -0.24692 | 1.03E-06 | 6.05E-06 |
| ZBTB16    | 11q23.2       | 0.246868 | 1.03E-06 | 6.08E-06 |
| SLC25A27  | 6p12.3        | -0.24685 | 1.04E-06 | 6.09E-06 |
| CSAD      | 12q13.13      | -0.24673 | 1.05E-06 | 6.17E-06 |
| SPCS2     | 11q13.4       | -0.24667 | 1.06E-06 | 6.20E-06 |
| CA8       | 8q12.1        | 0.246664 | 1.06E-06 | 6.20E-06 |
| PSMC1     | 14q32.11      | -0.24662 | 1.06E-06 | 6.23E-06 |
| TAPT1     | 4p15.32       | 0.246562 | 1.07E-06 | 6.27E-06 |
| JMJD6     | 17q25.1       | -0.24655 | 1.07E-06 | 6.27E-06 |
| CRYAA     | 21q22.3       | -0.24652 | 1.07E-06 | 6.29E-06 |
| ZBTB48    | 1p36.31       | -0.24643 | 1.08E-06 | 6.35E-06 |
| KCNQ1     | 11p15.5-p15.4 | -0.24639 | 1.09E-06 | 6.37E-06 |
| PPP2R5A   | 1q32.3        | 0.246389 | 1.09E-06 | 6.37E-06 |
| PTOV1     | 19q13.33      | -0.24635 | 1.09E-06 | 6.39E-06 |
| PTPN13    | 4q21.3        | 0.246346 | 1.09E-06 | 6.40E-06 |

|           |                    |          |          |          |
|-----------|--------------------|----------|----------|----------|
| PSMD4     | 1q21.3             | -0.24634 | 1.09E-06 | 6.40E-06 |
| GFRA1     | 10q25.3            | 0.246302 | 1.10E-06 | 6.42E-06 |
| FLT1      | 13q12.3            | 0.24629  | 1.10E-06 | 6.43E-06 |
| UBR7      | 14q32.12           | 0.246235 | 1.10E-06 | 6.46E-06 |
| TMCC1     | 3q22.1             | 0.24621  | 1.11E-06 | 6.47E-06 |
| LRRC29    | 16q22.1            | -0.24621 | 1.11E-06 | 6.47E-06 |
| KRT23     | 17q21.2            | -0.24616 | 1.11E-06 | 6.51E-06 |
| ATG101    | 12q13.13           | -0.24614 | 1.12E-06 | 6.52E-06 |
| ATRNL1    | 10q25.3            | 0.246125 | 1.12E-06 | 6.53E-06 |
| NEURL2    | 20q13.12           | -0.24608 | 1.12E-06 | 6.56E-06 |
| ASNS      | 7q21.3             | -0.246   | 1.13E-06 | 6.61E-06 |
| CD151     | 11p15.5            | -0.24591 | 1.14E-06 | 6.67E-06 |
| RPS6KL1   | 14q24.3            | -0.2459  | 1.14E-06 | 6.67E-06 |
| UGT8      | 4q26               | 0.245889 | 1.14E-06 | 6.68E-06 |
| RCN1      | 11p13              | -0.24587 | 1.15E-06 | 6.69E-06 |
| MAN2A2    | 15q26.1            | 0.245827 | 1.15E-06 | 6.72E-06 |
| ACE       | 17q23.3            | 0.245815 | 1.15E-06 | 6.72E-06 |
| POMT1     | 9q34.13            | -0.24579 | 1.16E-06 | 6.74E-06 |
| SUSD1     | 9q31.3-q32         | 0.24576  | 1.16E-06 | 6.76E-06 |
| POLRMT    | 19p13.3            | -0.24575 | 1.16E-06 | 6.76E-06 |
| GNG2      | 14q22.1            | 0.245711 | 1.17E-06 | 6.79E-06 |
| ANK2      | 4q25-q26           | 0.245686 | 1.17E-06 | 6.80E-06 |
| ARL5B     | 10p12.31           | 0.245602 | 1.18E-06 | 6.86E-06 |
| CLASRP    | 19q13.32           | -0.24554 | 1.19E-06 | 6.90E-06 |
| PER2      | 2q37.3             | 0.245492 | 1.19E-06 | 6.93E-06 |
| STARD3    | 17q12              | -0.24547 | 1.20E-06 | 6.95E-06 |
| FCHSD1    | 5q31.3             | -0.24546 | 1.20E-06 | 6.95E-06 |
| CDC42EP3  | 2p22.2             | 0.24543  | 1.20E-06 | 6.97E-06 |
| PIPOX     | 17q11.2            | -0.24539 | 1.21E-06 | 7.00E-06 |
| CXCR4     | 2q22.1             | 0.245367 | 1.21E-06 | 7.01E-06 |
| DDX55     | 12q24.31           | -0.24535 | 1.21E-06 | 7.03E-06 |
| SHE       | 1q21.3             | 0.245344 | 1.21E-06 | 7.03E-06 |
| PRR34-AS1 | 22q13.31           | -0.24532 | 1.21E-06 | 7.04E-06 |
| IL7R      | 5p13.2             | 0.245305 | 1.22E-06 | 7.05E-06 |
| PRDM2     | 1p36.21            | 0.245273 | 1.22E-06 | 7.07E-06 |
| TMEM198   | 2q35               | -0.24527 | 1.22E-06 | 7.07E-06 |
| CST3      | 20p11.21           | -0.24526 | 1.22E-06 | 7.08E-06 |
| JOSD2     | 19q13.33           | -0.24524 | 1.22E-06 | 7.09E-06 |
| RPP38     | 10p13              | -0.24521 | 1.23E-06 | 7.11E-06 |
| DBNDD2    | 20q13.12           | -0.24521 | 1.23E-06 | 7.11E-06 |
| ASAH2B    | 10q11.23           | 0.245193 | 1.23E-06 | 7.12E-06 |
| TAF6      | 7q22.1             | -0.24519 | 1.23E-06 | 7.12E-06 |
| B3GNTL1   | 17q25.3            | -0.24516 | 1.23E-06 | 7.14E-06 |
| PGS1      | 17q25.3            | -0.2451  | 1.24E-06 | 7.18E-06 |
| DTX3L     | 3q21.1             | 0.245092 | 1.24E-06 | 7.18E-06 |
| FLT3      | 13q12.2            | 0.245064 | 1.25E-06 | 7.20E-06 |
| UBALD1    | 16p13.3            | -0.24505 | 1.25E-06 | 7.21E-06 |
| WIPF1     | 2q31.1             | 0.24504  | 1.25E-06 | 7.22E-06 |
| CADM3     | 1q23.2             | 0.245037 | 1.25E-06 | 7.22E-06 |
| LINC01101 | 2q14.2             | -0.24501 | 1.25E-06 | 7.23E-06 |
| CDCA5     | 11q13.1            | -0.245   | 1.25E-06 | 7.24E-06 |
| P2RY8     | Xp22.33 and Yp11.2 | 0.244938 | 1.26E-06 | 7.28E-06 |
| FLJ42627  | 16p13.3            | 0.244891 | 1.27E-06 | 7.32E-06 |
| KRTAP3-2  | 17q21.2            | -0.24488 | 1.27E-06 | 7.32E-06 |
| RAB18     | 10p12.1            | 0.244878 | 1.27E-06 | 7.32E-06 |
| SUMO1     | 2q33.1             | -0.24479 | 1.28E-06 | 7.38E-06 |
| TMED1     | 19p13.2            | -0.24479 | 1.28E-06 | 7.38E-06 |
| MICAL2    | 11p15.3            | 0.244768 | 1.28E-06 | 7.40E-06 |

|           |                 |          |          |          |
|-----------|-----------------|----------|----------|----------|
| NME1-NME2 | 17q21.33        | -0.24476 | 1.29E-06 | 7.40E-06 |
| SMARCD2   | 17q23.3         | -0.24475 | 1.29E-06 | 7.41E-06 |
| RABL6     | 9q34.3          | -0.2447  | 1.29E-06 | 7.45E-06 |
| NFKBIL1   | 6p21.33         | -0.24469 | 1.29E-06 | 7.45E-06 |
| SLC7A5    | 16q24.2         | -0.24468 | 1.30E-06 | 7.46E-06 |
| SRA1      | 5q31.3          | -0.24457 | 1.31E-06 | 7.54E-06 |
| KDM4B     | 19p13.3         | 0.244568 | 1.31E-06 | 7.54E-06 |
| CENPM     | 22q13.2         | -0.24457 | 1.31E-06 | 7.54E-06 |
| ECM1      | 1q21.2          | 0.244564 | 1.31E-06 | 7.54E-06 |
| CCDC88C   | 14q32.11-q32.12 | 0.244558 | 1.31E-06 | 7.54E-06 |
| MAP2K4    | 17p12           | 0.244558 | 1.31E-06 | 7.54E-06 |
| GPRC5B    | 16p12.3         | 0.244534 | 1.32E-06 | 7.55E-06 |
| CLBA1     | 14q32.33        | -0.24453 | 1.32E-06 | 7.55E-06 |
| NSMCE2    | 8q24.13         | -0.2445  | 1.32E-06 | 7.58E-06 |
| ITPRID1   | 7p14.3          | 0.244459 | 1.33E-06 | 7.60E-06 |
| AFG3L1P   | 16q24.3         | -0.24427 | 1.35E-06 | 7.75E-06 |
| PGGHG     | 11p15.5         | -0.24424 | 1.36E-06 | 7.77E-06 |
| SOD3      | 4p15.2          | 0.244238 | 1.36E-06 | 7.77E-06 |
| RNF126    | 19p13.3         | -0.24417 | 1.37E-06 | 7.83E-06 |
| CHD1      | 5q15-q21.1      | 0.244113 | 1.37E-06 | 7.87E-06 |
| ABCA6     | 17q24.2-q24.3   | 0.244103 | 1.38E-06 | 7.87E-06 |
| TMEM184C  | 4q31.23         | 0.244086 | 1.38E-06 | 7.88E-06 |
| DDOST     | 1p36.12         | -0.24408 | 1.38E-06 | 7.88E-06 |
| SLC22A23  | 6p25.2          | 0.244067 | 1.38E-06 | 7.90E-06 |
| PRMT9     | 4q31.23         | 0.244063 | 1.38E-06 | 7.90E-06 |
| ALDH9A1   | 1q24.1          | 0.244015 | 1.39E-06 | 7.93E-06 |
| RPP30     | 10q23.31        | -0.24399 | 1.39E-06 | 7.95E-06 |
| SLC18A2   | 10q25.3         | 0.243972 | 1.39E-06 | 7.96E-06 |
| LOC401052 | 3p25.3          | -0.24397 | 1.39E-06 | 7.97E-06 |
| YKT6      | 7p13            | -0.24396 | 1.40E-06 | 7.97E-06 |
| DOLK      | 9q34.11         | -0.24396 | 1.40E-06 | 7.97E-06 |
| DTX1      | 12q24.13        | 0.243921 | 1.40E-06 | 8.00E-06 |
| INTS1     | 7p22.3          | -0.2439  | 1.40E-06 | 8.01E-06 |
| SDK1      | 7p22.2          | 0.243901 | 1.40E-06 | 8.01E-06 |
| HHAT      | 1q32.2          | 0.243897 | 1.40E-06 | 8.01E-06 |
| GMCL1     | 2p13.3          | 0.243869 | 1.41E-06 | 8.03E-06 |
| ASAH1     | 8p22            | 0.243869 | 1.41E-06 | 8.03E-06 |
| FUOM      | 10q26.3         | -0.24385 | 1.41E-06 | 8.04E-06 |
| HAUS2     | 15q15.2         | 0.243824 | 1.42E-06 | 8.06E-06 |
| GIT2      | 12q24.11        | 0.243813 | 1.42E-06 | 8.07E-06 |
| ING5      | 2q37.3          | -0.24378 | 1.42E-06 | 8.10E-06 |
| NDUFAF5   | 20p12.1         | -0.24377 | 1.42E-06 | 8.10E-06 |
| SF3B1     | 2q33.1          | 0.243766 | 1.42E-06 | 8.10E-06 |
| SH3GLB1   | 1p22.3          | 0.243762 | 1.42E-06 | 8.10E-06 |
| TMEM256   | 17p13.1         | -0.24372 | 1.43E-06 | 8.13E-06 |
| HMGA1     | 6p21.31         | -0.24362 | 1.44E-06 | 8.21E-06 |
| VPS4A     | 16q22.1         | -0.24358 | 1.45E-06 | 8.24E-06 |
| SPN       | 16p11.2         | 0.243567 | 1.45E-06 | 8.25E-06 |
| PIP4K2A   | 10p12.2         | 0.243557 | 1.45E-06 | 8.26E-06 |
| DYNC1I2   | 2q31.1          | 0.24355  | 1.46E-06 | 8.26E-06 |
| CCT4      | 2p15            | -0.24352 | 1.46E-06 | 8.29E-06 |
| A2M       | 12p13.31        | 0.243518 | 1.46E-06 | 8.29E-06 |
| EIF3K     | 19q13.2         | -0.24348 | 1.47E-06 | 8.31E-06 |
| IFITM1    | 11p15.5         | -0.24345 | 1.47E-06 | 8.34E-06 |
| HSF2      | 6q22.31         | -0.24342 | 1.48E-06 | 8.36E-06 |
| LY6E      | 8q24.3          | -0.24341 | 1.48E-06 | 8.37E-06 |
| ELL2      | 5q15            | 0.24335  | 1.49E-06 | 8.42E-06 |
| SMAD7     | 18q21.1         | 0.243324 | 1.49E-06 | 8.44E-06 |



|          |                |          |          |          |
|----------|----------------|----------|----------|----------|
| ADD1     | 4p16.3         | 0.243288 | 1.49E-06 | 8.47E-06 |
| C19ORF47 | 19q13.2        | -0.24328 | 1.50E-06 | 8.47E-06 |
| UST      | 6q25.1         | 0.243279 | 1.50E-06 | 8.47E-06 |
| AKR1C4   | 10p15.1        | -0.24325 | 1.50E-06 | 8.49E-06 |
| EEF1E1   | 6p24.3         | -0.24324 | 1.50E-06 | 8.50E-06 |
| ABHD16B  | 20q13.33       | -0.24313 | 1.52E-06 | 8.59E-06 |
| APMAP    | 20p11.21       | -0.24302 | 1.54E-06 | 8.69E-06 |
| SLC24A3  | 20p11.23       | 0.242996 | 1.54E-06 | 8.71E-06 |
| ZNF767P  | 7q36.1         | -0.24296 | 1.55E-06 | 8.73E-06 |
| FFAR4    | 10q23.33       | 0.242924 | 1.55E-06 | 8.76E-06 |
| DCLK2    | 4q31.23-q31.3  | 0.242802 | 1.57E-06 | 8.87E-06 |
| H2AFZ    | 4q23           | -0.2428  | 1.57E-06 | 8.87E-06 |
| ACVR1    | 2q24.1         | 0.242748 | 1.58E-06 | 8.92E-06 |
| RPL5     | 1p22.1         | -0.24262 | 1.60E-06 | 9.03E-06 |
| VPS39    | 15q15.1        | 0.242616 | 1.60E-06 | 9.03E-06 |
| FLYWCH2  | 16p13.3        | -0.24259 | 1.60E-06 | 9.05E-06 |
| FGL2     | 7q11.23        | 0.242559 | 1.61E-06 | 9.08E-06 |
| FAT4     | 4q28.1         | 0.242549 | 1.61E-06 | 9.08E-06 |
| COL6A3   | 2q37.3         | 0.242544 | 1.61E-06 | 9.09E-06 |
| NWD1     | 19p13.11       | 0.242539 | 1.61E-06 | 9.09E-06 |
| FGFR4    | 5q35.2         | -0.24251 | 1.62E-06 | 9.12E-06 |
| RBSN     | 3p25.1         | 0.242458 | 1.63E-06 | 9.16E-06 |
| NEGR1    | 1p31.1         | 0.242427 | 1.63E-06 | 9.19E-06 |
| SPACA6   | 19q13.41       | -0.24238 | 1.64E-06 | 9.22E-06 |
| TNIP2    | 4p16.3         | -0.24236 | 1.64E-06 | 9.24E-06 |
| SLF2     | 10q24.31       | 0.2423   | 1.65E-06 | 9.30E-06 |
| FTH1P3   | 2p23.3         | -0.24225 | 1.66E-06 | 9.34E-06 |
| IMMP1L   | 11p13          | -0.24223 | 1.66E-06 | 9.36E-06 |
| GTF2H5   | 6q25.3         | -0.2422  | 1.67E-06 | 9.38E-06 |
| TJAP1    | 6p21.1         | -0.24218 | 1.67E-06 | 9.40E-06 |
| EDC3     | 15q24.1        | 0.242159 | 1.68E-06 | 9.42E-06 |
| BRAF     | 7q34           | 0.242146 | 1.68E-06 | 9.43E-06 |
| C9ORF163 | 9q34.3         | -0.24213 | 1.68E-06 | 9.44E-06 |
| DNAH17   | 17q25.3        | -0.24212 | 1.68E-06 | 9.44E-06 |
| ZNF251   | 8q24.3         | -0.24211 | 1.69E-06 | 9.46E-06 |
| DFFA     | 1p36.22        | -0.2421  | 1.69E-06 | 9.47E-06 |
| CACNA1C  | 12p13.33       | 0.242075 | 1.69E-06 | 9.48E-06 |
| G6PD     | Xq28           | -0.24207 | 1.69E-06 | 9.49E-06 |
| NKD2     | 5p15.33        | -0.24204 | 1.70E-06 | 9.51E-06 |
| AGFG1    | 2q36.3         | 0.242033 | 1.70E-06 | 9.51E-06 |
| CNTD1    | 17q21.2-q21.31 | -0.24199 | 1.71E-06 | 9.56E-06 |
| GIGYF1   | 7q22.1         | -0.24189 | 1.72E-06 | 9.65E-06 |
| GPR35    | 2q37.3         | -0.24189 | 1.72E-06 | 9.65E-06 |
| RPL10    | Xq28           | -0.24188 | 1.72E-06 | 9.65E-06 |
| ZNF800   | 7q31.33        | 0.241833 | 1.73E-06 | 9.70E-06 |
| ANKRD45  | 1q25.1         | 0.241735 | 1.75E-06 | 9.79E-06 |
| SP2      | 17q21.32       | 0.241725 | 1.75E-06 | 9.80E-06 |
| SAPCD2   | 9q34.3         | -0.24171 | 1.75E-06 | 9.81E-06 |
| GATB     | 4q31.3         | -0.24169 | 1.76E-06 | 9.83E-06 |
| LAMTOR5  | 1p13.3         | -0.24164 | 1.77E-06 | 9.87E-06 |
| YY1AP1   | 1q22           | 0.241619 | 1.77E-06 | 9.89E-06 |
| ADCY10P1 | 6p21.1         | -0.24157 | 1.78E-06 | 9.94E-06 |
| SP6      | 17q21.32       | -0.24153 | 1.79E-06 | 9.98E-06 |
| TASOR    | 3p14.3         | 0.241517 | 1.79E-06 | 9.99E-06 |
| CCDC59   | 12q21.31       | -0.24151 | 1.79E-06 | 9.99E-06 |
| LAX1     | 1q32.1         | 0.241479 | 1.80E-06 | 1.00E-05 |
| ZEB1     | 10p11.22       | 0.241453 | 1.80E-06 | 1.00E-05 |
| ZSCAN22  | 19q13.43       | 0.241351 | 1.82E-06 | 1.01E-05 |

|           |              |          |          |          |
|-----------|--------------|----------|----------|----------|
| PRDM8     | 4q21.21      | 0.241347 | 1.82E-06 | 1.01E-05 |
| ZNF296    | 19q13.32     | -0.24134 | 1.82E-06 | 1.01E-05 |
| TRIM56    | 7q22.1       | 0.24127  | 1.84E-06 | 1.02E-05 |
| ANOS1     | Xp22.31      | 0.241255 | 1.84E-06 | 1.02E-05 |
| MUC2      | 11p15.5      | 0.241254 | 1.84E-06 | 1.02E-05 |
| SNRPD3    | 22q11.23     | -0.24122 | 1.84E-06 | 1.03E-05 |
| P2RY10    | Xq21.1       | 0.241217 | 1.84E-06 | 1.03E-05 |
| ABCA1     | 9q31.1       | 0.241196 | 1.85E-06 | 1.03E-05 |
| BAG3      | 10q26.11     | 0.241194 | 1.85E-06 | 1.03E-05 |
| CD4       | 12p13.31     | 0.241177 | 1.85E-06 | 1.03E-05 |
| APOM      | 6p21.33      | -0.24113 | 1.86E-06 | 1.03E-05 |
| MPDZ      | 9p23         | 0.241079 | 1.87E-06 | 1.04E-05 |
| KIF2A     | 5q12.1       | 0.241057 | 1.88E-06 | 1.04E-05 |
| BCL2L1    | 20q11.21     | -0.24105 | 1.88E-06 | 1.04E-05 |
| MAMLD1    | Xq28         | 0.241031 | 1.88E-06 | 1.04E-05 |
| METTL7A   | 12q13.12     | 0.240998 | 1.89E-06 | 1.05E-05 |
| UTP25     | 1q32.2       | 0.24091  | 1.90E-06 | 1.06E-05 |
| AKT1S1    | 19q13.33     | -0.24089 | 1.91E-06 | 1.06E-05 |
| BARD1     | 2q35         | 0.24088  | 1.91E-06 | 1.06E-05 |
| C10ORF105 | 10q22.1      | 0.240843 | 1.92E-06 | 1.06E-05 |
| DDC       | 7p12.2-p12.1 | -0.24081 | 1.92E-06 | 1.07E-05 |
| AHCYL2    | 7q32.1       | 0.240805 | 1.92E-06 | 1.07E-05 |
| CELP      | 9q34.13      | -0.24078 | 1.93E-06 | 1.07E-05 |
| XRCC3     | 14q32.33     | -0.24077 | 1.93E-06 | 1.07E-05 |
| ARMC10    | 7q22.1       | -0.24075 | 1.93E-06 | 1.07E-05 |
| CD109     | 6q13         | 0.240697 | 1.94E-06 | 1.08E-05 |
| SLC19A3   | 2q36.3       | -0.24067 | 1.95E-06 | 1.08E-05 |
| SHISA5    | 3p21.31      | -0.24052 | 1.98E-06 | 1.09E-05 |
| SKA3      | 13q12.11     | -0.24044 | 2.00E-06 | 1.10E-05 |
| ADAMTSL3  | 15q25.2      | 0.24043  | 2.00E-06 | 1.10E-05 |
| MRPS18C   | 4q21.23      | -0.24043 | 2.00E-06 | 1.10E-05 |
| UTP11     | 1p34.3       | -0.24041 | 2.00E-06 | 1.11E-05 |
| TMEM106A  | 17q21.31     | 0.240359 | 2.01E-06 | 1.11E-05 |
| ADGRL2    | 1p31.1       | 0.240348 | 2.01E-06 | 1.11E-05 |
| FAM174B   | 15q26.1      | 0.2403   | 2.02E-06 | 1.12E-05 |
| FAM114A2  | 5q33.2       | 0.240251 | 2.03E-06 | 1.12E-05 |
| ZBTB17    | 1p36.13      | -0.24024 | 2.04E-06 | 1.12E-05 |
| MAPKAPK3  | 3p21.2       | -0.24023 | 2.04E-06 | 1.12E-05 |
| APBB1IP   | 10p12.1      | 0.240133 | 2.06E-06 | 1.13E-05 |
| NARF      | 17q25.3      | -0.2401  | 2.07E-06 | 1.14E-05 |
| CBFA2T3   | 16q24.3      | 0.240085 | 2.07E-06 | 1.14E-05 |
| LONP1     | 19p13.3      | -0.24008 | 2.07E-06 | 1.14E-05 |
| USP22     | 17p11.2      | 0.240063 | 2.07E-06 | 1.14E-05 |
| FPGS      | 9q34.11      | -0.24003 | 2.08E-06 | 1.15E-05 |
| TJP2      | 9q21.11      | 0.239934 | 2.10E-06 | 1.16E-05 |
| ITGAM     | 16p11.2      | 0.239919 | 2.10E-06 | 1.16E-05 |
| CD276     | 15q24.1      | 0.239794 | 2.13E-06 | 1.17E-05 |
| MOCS3     | 20q13.13     | -0.23977 | 2.14E-06 | 1.17E-05 |
| GAB1      | 4q31.21      | 0.239719 | 2.15E-06 | 1.18E-05 |
| TBL2      | 7q11.23      | -0.23963 | 2.16E-06 | 1.19E-05 |
| DDX39B    | 6p21.33      | -0.23959 | 2.17E-06 | 1.19E-05 |
| TECPR1    | 7q21.3       | 0.239593 | 2.17E-06 | 1.19E-05 |
| AURKB     | 17p13.1      | -0.23958 | 2.18E-06 | 1.20E-05 |
| SHISAL1   | 22q13.31     | 0.23955  | 2.18E-06 | 1.20E-05 |
| FANCG     | 9p13.3       | -0.2395  | 2.19E-06 | 1.20E-05 |
| PGR       | 11q22.1      | 0.239482 | 2.20E-06 | 1.21E-05 |
| DESI1     | 22q13.2      | -0.23946 | 2.20E-06 | 1.21E-05 |
| INPP4B    | 4q31.21      | 0.239426 | 2.21E-06 | 1.21E-05 |

|           |          |          |          |          |
|-----------|----------|----------|----------|----------|
| CAP1      | 1p34.2   | 0.239415 | 2.21E-06 | 1.21E-05 |
| SLC25A1   | 22q11.21 | -0.2394  | 2.22E-06 | 1.22E-05 |
| CTSE      | 1q32.1   | 0.239387 | 2.22E-06 | 1.22E-05 |
| RMRP      | 9p13.3   | -0.23936 | 2.22E-06 | 1.22E-05 |
| KRBOX4    | Xp11.3   | -0.23935 | 2.23E-06 | 1.22E-05 |
| CPSF1     | 8q24.3   | -0.23929 | 2.24E-06 | 1.23E-05 |
| CD163L1   | 12p13.31 | 0.239284 | 2.24E-06 | 1.23E-05 |
| DESI2     | 1q44     | 0.239254 | 2.25E-06 | 1.23E-05 |
| MRAP2     | 6q14.2   | 0.23911  | 2.28E-06 | 1.25E-05 |
| TADA2B    | 4p16.1   | 0.23911  | 2.28E-06 | 1.25E-05 |
| CXORF40A  | Xq28     | -0.2391  | 2.28E-06 | 1.25E-05 |
| NUFIP2    | 17q11.2  | 0.239093 | 2.28E-06 | 1.25E-05 |
| ZNF517    | 8q24.3   | -0.23909 | 2.29E-06 | 1.25E-05 |
| NELFB     | 9q34.3   | -0.23908 | 2.29E-06 | 1.25E-05 |
| HSPA2     | 14q23.3  | 0.239059 | 2.29E-06 | 1.25E-05 |
| SLC25A17  | 22q13.2  | -0.23906 | 2.29E-06 | 1.25E-05 |
| TMEM243   | 7q21.12  | -0.23905 | 2.30E-06 | 1.25E-05 |
| TENM4     | 11q14.1  | 0.239014 | 2.30E-06 | 1.26E-05 |
| PBX1      | 1q23.3   | 0.238977 | 2.31E-06 | 1.26E-05 |
| RAD51B    | 14q24.1  | -0.23895 | 2.32E-06 | 1.26E-05 |
| SGK1      | 6q23.2   | 0.238919 | 2.33E-06 | 1.27E-05 |
| METTL7B   | 12q13.2  | -0.23892 | 2.33E-06 | 1.27E-05 |
| AIMP1     | 4q24     | -0.23883 | 2.34E-06 | 1.28E-05 |
| LINC00653 | 20p11.23 | -0.23871 | 2.37E-06 | 1.29E-05 |
| NDUFAF4   | 6q16.1   | -0.2387  | 2.38E-06 | 1.30E-05 |
| EIF2B1    | 12q24.31 | -0.23869 | 2.38E-06 | 1.30E-05 |
| CFDP1     | 16q23.1  | -0.23868 | 2.38E-06 | 1.30E-05 |
| ZNF225    | 19q13.31 | 0.23867  | 2.38E-06 | 1.30E-05 |
| SHFL      | 19p13.2  | -0.23865 | 2.39E-06 | 1.30E-05 |
| CHRNA3    | 15q25.1  | 0.238614 | 2.40E-06 | 1.30E-05 |
| FAM13A    | 4q22.1   | 0.238549 | 2.41E-06 | 1.31E-05 |
| EEF1B2    | 2q33.3   | -0.23855 | 2.41E-06 | 1.31E-05 |
| PSMA3     | 14q23.1  | -0.23855 | 2.41E-06 | 1.31E-05 |
| CEP120    | 5q23.2   | 0.238537 | 2.42E-06 | 1.31E-05 |
| SEC62     | 3q26.2   | 0.238444 | 2.44E-06 | 1.32E-05 |
| CES4A     | 16q22.1  | -0.23843 | 2.44E-06 | 1.33E-05 |
| GARS      | 7p14.3   | -0.2384  | 2.45E-06 | 1.33E-05 |
| VIT       | 2p22.2   | 0.238393 | 2.45E-06 | 1.33E-05 |
| JAG1      | 20p12.2  | 0.238355 | 2.46E-06 | 1.34E-05 |
| TMSB10    | 2p11.2   | -0.23828 | 2.48E-06 | 1.34E-05 |
| SOAT1     | 1q25.2   | 0.238225 | 2.49E-06 | 1.35E-05 |
| C7ORF13   | 7q36.3   | -0.23816 | 2.51E-06 | 1.36E-05 |
| RGPD1     | 2p11.2   | 0.238157 | 2.51E-06 | 1.36E-05 |
| MAPK1IP1L | 14q22.3  | 0.238142 | 2.51E-06 | 1.36E-05 |
| LINC00910 | 17q21.31 | -0.23812 | 2.52E-06 | 1.36E-05 |
| ANKRD28   | 3p25.1   | 0.23811  | 2.52E-06 | 1.37E-05 |
| IFI16     | 1q23.1   | 0.238103 | 2.52E-06 | 1.37E-05 |
| MAGOHB    | 12p13.2  | -0.23807 | 2.53E-06 | 1.37E-05 |
| SCIMP     | 17p13.2  | 0.238058 | 2.53E-06 | 1.37E-05 |
| CDH11     | 16q21    | 0.238051 | 2.54E-06 | 1.37E-05 |
| HMGB1     | 13q12.3  | -0.238   | 2.55E-06 | 1.38E-05 |
| FOXA1     | 14q21.1  | 0.237953 | 2.56E-06 | 1.38E-05 |
| METTL25   | 12q21.31 | 0.23792  | 2.57E-06 | 1.39E-05 |
| BAP1      | 3p21.1   | -0.23792 | 2.57E-06 | 1.39E-05 |
| TSNARE1   | 8q24.3   | -0.23791 | 2.57E-06 | 1.39E-05 |
| FKBP15    | 9q32     | 0.237886 | 2.58E-06 | 1.39E-05 |
| PCM1      | 8p22     | 0.237874 | 2.58E-06 | 1.39E-05 |
| SPRYD7    | 13q14.2  | -0.23785 | 2.59E-06 | 1.40E-05 |

|                 |              |          |          |          |
|-----------------|--------------|----------|----------|----------|
| BNC2            | 9p22.3-p22.2 | 0.237838 | 2.59E-06 | 1.40E-05 |
| SLC16A6         | 17q24.2      | 0.237823 | 2.59E-06 | 1.40E-05 |
| PPARGC1B        | 5q32         | 0.23778  | 2.61E-06 | 1.41E-05 |
| DSCC1           | 8q24.12      | -0.23762 | 2.65E-06 | 1.43E-05 |
| USP54           | 10q22.2      | 0.237589 | 2.66E-06 | 1.43E-05 |
| ZGLP1           | 19p13.2      | -0.23758 | 2.66E-06 | 1.43E-05 |
| TBC1D23         | 3q12.1-q12.2 | 0.237572 | 2.66E-06 | 1.43E-05 |
| RBKS            | 2p23.2       | -0.2375  | 2.68E-06 | 1.44E-05 |
| SMG6            | 17p13.3      | 0.237484 | 2.68E-06 | 1.45E-05 |
| UPF2            | 10p14        | 0.237476 | 2.69E-06 | 1.45E-05 |
| SCG5            | 15q13.3      | 0.237465 | 2.69E-06 | 1.45E-05 |
| MTFR2           | 6q23.3       | -0.23745 | 2.69E-06 | 1.45E-05 |
| CARS            | 11p15.4      | -0.23743 | 2.70E-06 | 1.45E-05 |
| GIMAP8          | 7q36.1       | 0.237413 | 2.70E-06 | 1.45E-05 |
| SCN4B           | 11q23.3      | 0.237393 | 2.71E-06 | 1.46E-05 |
| DNAJC7          | 17q21.2      | -0.23734 | 2.72E-06 | 1.46E-05 |
| PIGQ            | 16p13.3      | -0.23733 | 2.73E-06 | 1.46E-05 |
| ZIK1            | 19q13.43     | 0.237287 | 2.74E-06 | 1.47E-05 |
| FLVCR1          | 1q32.3       | 0.237284 | 2.74E-06 | 1.47E-05 |
| NEDD8           | 14q12        | -0.23727 | 2.74E-06 | 1.47E-05 |
| BARX2           | 11q24.3      | 0.237254 | 2.75E-06 | 1.47E-05 |
| COA6            | 1q42.2       | -0.2372  | 2.76E-06 | 1.48E-05 |
| BLCAP           | 20q11.23     | -0.23718 | 2.76E-06 | 1.48E-05 |
| ZNF696          | 8q24.3       | -0.23715 | 2.77E-06 | 1.49E-05 |
| THBS1           | 15q14        | 0.237089 | 2.79E-06 | 1.50E-05 |
| DHX33           | 17p13.2      | 0.237039 | 2.80E-06 | 1.50E-05 |
| CLTA            | 9p13.3       | -0.23702 | 2.81E-06 | 1.51E-05 |
| SPOCK2          | 10q22.1      | 0.236935 | 2.83E-06 | 1.52E-05 |
| CHCHD4          | 3p25.1       | -0.23685 | 2.86E-06 | 1.53E-05 |
| FAT1            | 4q35.2       | 0.236835 | 2.86E-06 | 1.53E-05 |
| GGH             | 8q12.3       | -0.23683 | 2.86E-06 | 1.53E-05 |
| ARSB            | 5q14.1       | 0.236743 | 2.89E-06 | 1.55E-05 |
| SYS1-DBNDD2     | 20q13.12     | -0.23673 | 2.89E-06 | 1.55E-05 |
| CCDC159         | 19p13.2      | -0.23672 | 2.90E-06 | 1.55E-05 |
| PDE4A           | 19p13.2      | 0.236675 | 2.91E-06 | 1.56E-05 |
| CENPN           | 16q23.2      | -0.23667 | 2.91E-06 | 1.56E-05 |
| PDE3A           | 12p12.2      | 0.236663 | 2.91E-06 | 1.56E-05 |
| CRYBB3          | 22q11.23     | -0.23665 | 2.92E-06 | 1.56E-05 |
| MYLK            | 3q21.1       | 0.236643 | 2.92E-06 | 1.56E-05 |
| PIK3R3          | 1p34.1       | 0.236574 | 2.94E-06 | 1.57E-05 |
| PDZD2           | 5p13.3       | 0.236538 | 2.95E-06 | 1.57E-05 |
| GPATCH11        | 2p22.2       | 0.236514 | 2.95E-06 | 1.58E-05 |
| CIDEB           | 14q12        | 0.23645  | 2.97E-06 | 1.59E-05 |
| C14ORF132       | 14q32.2      | 0.236421 | 2.98E-06 | 1.59E-05 |
| GEMIN8P4        | 1p22.2       | -0.23639 | 2.99E-06 | 1.60E-05 |
| PTP4A3          | 8q24.3       | -0.23638 | 2.99E-06 | 1.60E-05 |
| NDUFB4          | 3q13.33      | -0.23638 | 3.00E-06 | 1.60E-05 |
| SLC9A9          | 3q24         | 0.23636  | 3.00E-06 | 1.60E-05 |
| ATP5F1C         | 10p14        | -0.23635 | 3.00E-06 | 1.60E-05 |
| NPIP3           | 16p12.2      | -0.23633 | 3.01E-06 | 1.60E-05 |
| BACH2           | 6q15         | 0.236298 | 3.02E-06 | 1.61E-05 |
| NCAM2           | 21q21.1      | 0.236292 | 3.02E-06 | 1.61E-05 |
| ZFYVE16         | 5q14.1       | 0.236279 | 3.02E-06 | 1.61E-05 |
| RGS18           | 1q31.2       | 0.236226 | 3.04E-06 | 1.62E-05 |
| TIMM23          | 10q11.22     | -0.23615 | 3.06E-06 | 1.63E-05 |
| IPP             | 1p34.1       | 0.236097 | 3.08E-06 | 1.64E-05 |
| ST8SIA4         | 5q21.1       | 0.236024 | 3.10E-06 | 1.65E-05 |
| ANKHD1-EIF4EBP3 | 5q31.3       | 0.236003 | 3.11E-06 | 1.65E-05 |

|            |                |          |          |          |
|------------|----------------|----------|----------|----------|
| ZNF221     | 19q13.31       | 0.235975 | 3.12E-06 | 1.66E-05 |
| GALNTL6    | 4q34.1         | 0.235962 | 3.12E-06 | 1.66E-05 |
| ANP32A-IT1 | 15q23          | 0.235934 | 3.13E-06 | 1.66E-05 |
| EIF1       | 17q21.2        | -0.23585 | 3.15E-06 | 1.68E-05 |
| PRC1       | 15q26.1        | 0.235839 | 3.16E-06 | 1.68E-05 |
| PCOTH      | 13q12.12       | -0.23583 | 3.16E-06 | 1.68E-05 |
| DPYSL3     | 5q32           | 0.235824 | 3.16E-06 | 1.68E-05 |
| PRKAB2     | 1q21.1         | 0.235821 | 3.16E-06 | 1.68E-05 |
| MGAT2      | 14q21.3        | 0.235752 | 3.19E-06 | 1.69E-05 |
| CANT1      | 17q25.3        | 0.235751 | 3.19E-06 | 1.69E-05 |
| CDC42SE2   | 5q31.1         | 0.235675 | 3.21E-06 | 1.70E-05 |
| CBWD2      | 2q14.1         | -0.23567 | 3.21E-06 | 1.70E-05 |
| COL8A1     | 3q12.1         | 0.235662 | 3.21E-06 | 1.70E-05 |
| APEX2      | Xp11.21        | -0.23563 | 3.22E-06 | 1.71E-05 |
| TTC37      | 5q15           | 0.235548 | 3.25E-06 | 1.72E-05 |
| RPA2       | 1p35.3         | -0.23552 | 3.26E-06 | 1.73E-05 |
| FAM189A2   | 9q21.12        | 0.235475 | 3.27E-06 | 1.73E-05 |
| GPRC5A     | 12p13.1        | 0.23545  | 3.28E-06 | 1.74E-05 |
| GOLGA3     | 12q24.33       | 0.235445 | 3.28E-06 | 1.74E-05 |
| KDM6B      | 17p13.1        | 0.235437 | 3.29E-06 | 1.74E-05 |
| NCBP3      | 17p13.2        | 0.235431 | 3.29E-06 | 1.74E-05 |
| FARSB      | 2q36.1         | -0.23543 | 3.29E-06 | 1.74E-05 |
| APPL1      | 3p14.3         | 0.235378 | 3.31E-06 | 1.75E-05 |
| YIPF2      | 19p13.2        | -0.23528 | 3.34E-06 | 1.76E-05 |
| SCARB2     | 4q21.1         | 0.235252 | 3.35E-06 | 1.77E-05 |
| TMEM191A   | 22q11.21       | -0.23524 | 3.35E-06 | 1.77E-05 |
| GP1BA      | 17p13.2        | 0.2352   | 3.36E-06 | 1.78E-05 |
| VEPH1      | 3q25.31-q25.32 | 0.235199 | 3.36E-06 | 1.78E-05 |
| KIAA0232   | 4p16.1         | 0.235159 | 3.38E-06 | 1.78E-05 |
| C1ORF109   | 1p34.3         | -0.23509 | 3.40E-06 | 1.79E-05 |
| POLR2K     | 8q22.2         | -0.23505 | 3.41E-06 | 1.80E-05 |
| SCARNA16   | 17q25.2        | -0.23505 | 3.42E-06 | 1.80E-05 |
| TMED7      | 5q22.3         | 0.235005 | 3.43E-06 | 1.81E-05 |
| PAX5       | 9p13.2         | 0.234996 | 3.43E-06 | 1.81E-05 |
| MAMDC2     | 9q21.12        | 0.234987 | 3.44E-06 | 1.81E-05 |
| C6ORF163   | 6q15           | -0.23496 | 3.45E-06 | 1.81E-05 |
| COL4A4     | 2q36.3         | 0.234945 | 3.45E-06 | 1.82E-05 |
| DYRK1A     | 21q22.13       | 0.23493  | 3.46E-06 | 1.82E-05 |
| QPRT       | 16p11.2        | -0.23491 | 3.46E-06 | 1.82E-05 |
| NXPE1      | 11q23.2        | 0.234911 | 3.46E-06 | 1.82E-05 |
| H2AFY      | 5q31.1         | -0.23488 | 3.47E-06 | 1.83E-05 |
| SLC37A2    | 11q24.2        | 0.234873 | 3.47E-06 | 1.83E-05 |
| SH3BP5     | 3p25.1         | 0.234863 | 3.48E-06 | 1.83E-05 |
| TSC22D2    | 3q25.1         | 0.234838 | 3.49E-06 | 1.83E-05 |
| AHSA2P     | 2p15           | -0.23478 | 3.51E-06 | 1.84E-05 |
| ITK        | 5q33.3         | 0.23476  | 3.51E-06 | 1.85E-05 |
| CDC123     | 10p14-p13      | -0.23474 | 3.52E-06 | 1.85E-05 |
| RPL21      | 13q12.2        | -0.23473 | 3.52E-06 | 1.85E-05 |
| DACT1      | 14q23.1        | 0.234707 | 3.53E-06 | 1.85E-05 |
| TNKS1BP1   | 11q12.1        | 0.234671 | 3.54E-06 | 1.86E-05 |
| CYSLTR2    | 13q14.2        | 0.23467  | 3.54E-06 | 1.86E-05 |
| CPSF2      | 14q32.12       | 0.234624 | 3.56E-06 | 1.87E-05 |
| LY6G6D     | 6p21.33        | -0.23462 | 3.56E-06 | 1.87E-05 |
| MOB3A      | 19p13.3        | 0.234608 | 3.57E-06 | 1.87E-05 |
| PKM        | 15q23          | 0.234593 | 3.57E-06 | 1.87E-05 |
| HIST1H2AH  | 6p22.1         | -0.23457 | 3.58E-06 | 1.88E-05 |
| TRPS1      | 8q23.3         | 0.234524 | 3.60E-06 | 1.88E-05 |
| RNF216P1   | 7p22.1         | -0.23452 | 3.60E-06 | 1.88E-05 |

|          |               |          |          |          |
|----------|---------------|----------|----------|----------|
| MAP3K13  | 3q27.2        | 0.234496 | 3.61E-06 | 1.89E-05 |
| ORC5     | 7q22.1-q22.2  | -0.23442 | 3.63E-06 | 1.90E-05 |
| MSANTD2  | 11q24.2       | -0.23436 | 3.65E-06 | 1.91E-05 |
| ZNF37A   | 10p11.1       | 0.234362 | 3.65E-06 | 1.91E-05 |
| FKBP11   | 12q13.12      | -0.23432 | 3.67E-06 | 1.92E-05 |
| CITED2   | 6q24.1        | 0.234322 | 3.67E-06 | 1.92E-05 |
| LAPTM4B  | 8q22.1        | -0.23431 | 3.67E-06 | 1.92E-05 |
| ATP8B4   | 15q21.2       | 0.234301 | 3.68E-06 | 1.92E-05 |
| FILIP1   | 6q14.1        | 0.234275 | 3.68E-06 | 1.92E-05 |
| SLC2A11  | 22q11.23      | -0.23425 | 3.69E-06 | 1.93E-05 |
| ABHD12   | 20p11.21      | -0.23423 | 3.70E-06 | 1.93E-05 |
| CDC25C   | 5q31.2        | -0.2342  | 3.71E-06 | 1.94E-05 |
| CDK6     | 7q21.2        | 0.234176 | 3.72E-06 | 1.94E-05 |
| FRMD6    | 14q22.1       | 0.234083 | 3.75E-06 | 1.96E-05 |
| LRP6     | 12p13.2       | 0.234079 | 3.76E-06 | 1.96E-05 |
| PCBP4    | 3p21.2        | -0.23408 | 3.76E-06 | 1.96E-05 |
| KCNT1    | 9q34.3        | -0.23402 | 3.78E-06 | 1.97E-05 |
| SEC14L1  | 17q25.2-q25.3 | 0.234014 | 3.78E-06 | 1.97E-05 |
| PWAR5    | 15q11.2       | 0.234003 | 3.78E-06 | 1.97E-05 |
| GABRE    | Xq28          | -0.23398 | 3.79E-06 | 1.98E-05 |
| COMMD1   | 2p15          | -0.23398 | 3.79E-06 | 1.98E-05 |
| SLC36A1  | 5q33.1        | 0.233939 | 3.81E-06 | 1.98E-05 |
| PSMG1    | 21q22.2       | -0.23386 | 3.84E-06 | 2.00E-05 |
| CDKN2B   | 9p21.3        | 0.233863 | 3.84E-06 | 2.00E-05 |
| STMN1    | 1p36.11       | -0.23385 | 3.84E-06 | 2.00E-05 |
| SEC61A2  | 10p14         | -0.23383 | 3.85E-06 | 2.00E-05 |
| SYNPO2   | 4q26          | 0.233821 | 3.85E-06 | 2.00E-05 |
| LETMD1   | 12q13.12      | -0.23382 | 3.85E-06 | 2.00E-05 |
| ITGA6    | 2q31.1        | 0.233764 | 3.87E-06 | 2.01E-05 |
| CFAP70   | 10q22.2       | -0.23373 | 3.89E-06 | 2.02E-05 |
| MEGF10   | 5q23.2        | 0.233649 | 3.92E-06 | 2.03E-05 |
| INHBA    | 7p14.1        | 0.233634 | 3.92E-06 | 2.04E-05 |
| GPR107   | 9q34.11       | 0.233618 | 3.93E-06 | 2.04E-05 |
| ILDR2    | 1q24.1        | 0.233599 | 3.94E-06 | 2.04E-05 |
| MAB21L3  | 1p13.1        | 0.233541 | 3.96E-06 | 2.05E-05 |
| DLG5-AS1 | 10q22.3       | -0.23352 | 3.97E-06 | 2.06E-05 |
| FGF11    | 17p13.1       | 0.233506 | 3.97E-06 | 2.06E-05 |
| SS18L1   | 20q13.33      | -0.23346 | 3.99E-06 | 2.07E-05 |
| TRIP13   | 5p15.33       | -0.23346 | 3.99E-06 | 2.07E-05 |
| GSPT1    | 16p13.13      | 0.233433 | 4.00E-06 | 2.07E-05 |
| SPECC1   | 17p11.2       | 0.233395 | 4.02E-06 | 2.08E-05 |
| GPR27    | 3p13          | 0.233373 | 4.02E-06 | 2.08E-05 |
| AHDC1    | 1p36.11-p35.3 | 0.233365 | 4.03E-06 | 2.09E-05 |
| ZDHHC16  | 10q24.1       | -0.23336 | 4.03E-06 | 2.09E-05 |
| NPFF     | 12q13.13      | -0.23331 | 4.05E-06 | 2.10E-05 |
| UTP14A   | Xq26.1        | -0.23331 | 4.05E-06 | 2.10E-05 |
| THEM6    | 8q24.3        | -0.23326 | 4.07E-06 | 2.10E-05 |
| TLR10    | 4p14          | 0.233256 | 4.07E-06 | 2.10E-05 |
| TMEM9    | 1q32.1        | -0.23325 | 4.07E-06 | 2.10E-05 |
| FAM216A  | 12q24.11      | -0.23323 | 4.08E-06 | 2.11E-05 |
| BAG4     | 8p11.23       | 0.233215 | 4.09E-06 | 2.11E-05 |
| GNAO1    | 16q13         | 0.233202 | 4.09E-06 | 2.11E-05 |
| BTG1     | 12q21.33      | 0.233191 | 4.10E-06 | 2.12E-05 |
| FAN1     | 15q13.3       | 0.233126 | 4.12E-06 | 2.13E-05 |
| IMPACT   | 18q11.2       | 0.233105 | 4.13E-06 | 2.13E-05 |
| C16ORF58 | 16p11.2       | -0.23309 | 4.14E-06 | 2.13E-05 |
| NSDHL    | Xq28          | -0.23305 | 4.15E-06 | 2.14E-05 |
| CARD14   | 17q25.3       | -0.23304 | 4.16E-06 | 2.15E-05 |

|         |              |          |          |          |
|---------|--------------|----------|----------|----------|
| ALKBH3  | 11p11.2      | -0.23302 | 4.17E-06 | 2.15E-05 |
| FBXL8   | 16q22.1      | -0.233   | 4.18E-06 | 2.15E-05 |
| EIF4G2  | 11p15.4      | 0.232997 | 4.18E-06 | 2.15E-05 |
| HDAC11  | 3p25.1       | -0.23295 | 4.19E-06 | 2.16E-05 |
| STX12   | 1p35.3       | 0.232943 | 4.20E-06 | 2.16E-05 |
| LSP1P5  | 1q21.1       | -0.23293 | 4.20E-06 | 2.16E-05 |
| ZNF704  | 8q21.13      | 0.232906 | 4.21E-06 | 2.17E-05 |
| DHRS12  | 13q14.3      | -0.23285 | 4.24E-06 | 2.18E-05 |
| CSNK1G3 | 5q23.2       | 0.232823 | 4.25E-06 | 2.19E-05 |
| CCDC141 | 2q31.2       | 0.23279  | 4.26E-06 | 2.19E-05 |
| SCEL    | 13q22.3      | 0.232752 | 4.28E-06 | 2.20E-05 |
| PSME2   | 14q12        | -0.23272 | 4.29E-06 | 2.21E-05 |
| GGTA1P  | 9q33.2       | 0.232704 | 4.30E-06 | 2.21E-05 |
| AKAP2   | 9q31.3       | 0.23261  | 4.34E-06 | 2.23E-05 |
| AMPD3   | 11p15.4      | 0.232498 | 4.38E-06 | 2.25E-05 |
| SCN3A   | 2q24.3       | 0.232496 | 4.38E-06 | 2.25E-05 |
| SGCD    | 5q33.2-q33.3 | 0.23241  | 4.42E-06 | 2.27E-05 |
| HDGFL2  | 19p13.3      | -0.2324  | 4.43E-06 | 2.27E-05 |
| ERN2    | 16p12.2      | 0.232358 | 4.44E-06 | 2.28E-05 |
| PPM1B   | 2p21         | 0.232332 | 4.45E-06 | 2.29E-05 |
| GPR183  | 13q32.3      | 0.232324 | 4.46E-06 | 2.29E-05 |
| WDYHV1  | 8q24.13      | -0.23232 | 4.46E-06 | 2.29E-05 |
| P2RY13  | 3q25.1       | 0.232315 | 4.46E-06 | 2.29E-05 |
| TEK     | 9p21.2       | 0.232248 | 4.49E-06 | 2.30E-05 |
| CSNK1A1 | 5q32         | 0.232238 | 4.50E-06 | 2.30E-05 |
| PKP3    | 11p15.5      | -0.23222 | 4.50E-06 | 2.31E-05 |
| DNMT3B  | 20q11.21     | -0.23217 | 4.52E-06 | 2.32E-05 |
| PNPO    | 17q21.32     | -0.23217 | 4.53E-06 | 2.32E-05 |
| PDCD2L  | 19q13.11     | -0.23215 | 4.54E-06 | 2.32E-05 |
| IGSF10  | 3q25.1       | 0.232127 | 4.54E-06 | 2.33E-05 |
| PNPT1   | 2p16.1       | -0.23211 | 4.55E-06 | 2.33E-05 |
| STMP1   | 7q33         | -0.23211 | 4.55E-06 | 2.33E-05 |
| C2ORF72 | 2q37.1       | 0.232103 | 4.56E-06 | 2.33E-05 |
| NEURL3  | 2q11.2       | -0.2321  | 4.56E-06 | 2.33E-05 |
| SURF6   | 9q34.2       | -0.23208 | 4.57E-06 | 2.33E-05 |
| ELAVL4  | 1p33-p32.3   | 0.232049 | 4.58E-06 | 2.34E-05 |
| RBPJ    | 4p15.2       | 0.232033 | 4.59E-06 | 2.34E-05 |
| UTP6    | 17q11.2      | -0.23202 | 4.59E-06 | 2.34E-05 |
| CYBC1   | 17q25.3      | -0.23198 | 4.61E-06 | 2.35E-05 |
| CMKLR1  | 12q23.3      | 0.231977 | 4.61E-06 | 2.35E-05 |
| DNAJC22 | 12q13.12     | 0.231958 | 4.62E-06 | 2.36E-05 |
| SSUH2   | 3p25.3       | -0.23189 | 4.65E-06 | 2.37E-05 |
| TMEM187 | Xq28         | -0.23188 | 4.65E-06 | 2.37E-05 |
| PRKG2   | 4q21.21      | 0.231871 | 4.66E-06 | 2.38E-05 |
| PDE6D   | 2q37.1       | -0.23184 | 4.67E-06 | 2.38E-05 |
| POLE4   | 2p12         | -0.23184 | 4.67E-06 | 2.38E-05 |
| RFC3    | 13q13.2      | -0.23183 | 4.68E-06 | 2.38E-05 |
| CERS5   | 12q13.12     | -0.23183 | 4.68E-06 | 2.38E-05 |
| GLO1    | 6p21.2       | -0.23179 | 4.69E-06 | 2.39E-05 |
| PAGR1   | 16p11.2      | -0.23176 | 4.71E-06 | 2.40E-05 |
| YJU2    | 19p13.3      | -0.23174 | 4.72E-06 | 2.40E-05 |
| IGF1    | 12q23.2      | 0.23171  | 4.73E-06 | 2.41E-05 |
| ZNF815P | 7p22.1       | -0.23169 | 4.74E-06 | 2.41E-05 |
| GSKIP   | 14q32.2      | 0.231677 | 4.75E-06 | 2.41E-05 |
| KTI12   | 1p32.3       | -0.23167 | 4.75E-06 | 2.42E-05 |
| REM2    | 14q11.2      | -0.23167 | 4.75E-06 | 2.42E-05 |
| RFXAP   | 13q13.3      | -0.23166 | 4.76E-06 | 2.42E-05 |
| NLGN3   | Xq13.1       | 0.231656 | 4.76E-06 | 2.42E-05 |

|          |                    |          |          |          |
|----------|--------------------|----------|----------|----------|
| ZNF7     | 8q24.3             | -0.23163 | 4.77E-06 | 2.42E-05 |
| IFITM3   | 11p15.5            | -0.23163 | 4.77E-06 | 2.42E-05 |
| RSBN1L   | 7q11.23            | 0.231598 | 4.78E-06 | 2.43E-05 |
| SCLY     | 2q37.3             | -0.23156 | 4.80E-06 | 2.44E-05 |
| CNNM4    | 2q11.2             | 0.231533 | 4.81E-06 | 2.44E-05 |
| GALK2    | 15q21.1-q21.2      | 0.23142  | 4.87E-06 | 2.47E-05 |
| NIP7     | 16q22.1            | -0.23142 | 4.87E-06 | 2.47E-05 |
| TMEM61   | 1p32.3             | 0.231303 | 4.92E-06 | 2.50E-05 |
| SMG1     | 16p12.3            | 0.231286 | 4.93E-06 | 2.50E-05 |
| C17ORF53 | 17q21.31           | -0.23127 | 4.94E-06 | 2.50E-05 |
| SPG7     | 16q24.3            | -0.23126 | 4.94E-06 | 2.51E-05 |
| ACAP3    | 1p36.33            | -0.23123 | 4.96E-06 | 2.51E-05 |
| MRPL16   | 11q12.1            | -0.2312  | 4.97E-06 | 2.52E-05 |
| VWF      | 12p13.31           | 0.231168 | 4.99E-06 | 2.53E-05 |
| ARMH4    | 14q23.1            | 0.231154 | 4.99E-06 | 2.53E-05 |
| BRD9     | 5p15.33            | -0.23113 | 5.00E-06 | 2.53E-05 |
| SND1     | 7q32.1             | -0.23113 | 5.01E-06 | 2.53E-05 |
| SPC25    | 2q24.3             | -0.23107 | 5.03E-06 | 2.55E-05 |
| PARD6A   | 16q22.1            | -0.23107 | 5.04E-06 | 2.55E-05 |
| FAH      | 15q25.1            | -0.231   | 5.07E-06 | 2.56E-05 |
| HIST1H4J | 6p22.1             | -0.23099 | 5.07E-06 | 2.56E-05 |
| KIRREL1  | 1q23.1             | 0.230991 | 5.07E-06 | 2.56E-05 |
| CNTN1    | 12q12              | 0.230972 | 5.08E-06 | 2.57E-05 |
| TUBG1    | 17q21.2            | -0.23092 | 5.11E-06 | 2.58E-05 |
| KARS     | 16q23.1            | -0.23091 | 5.11E-06 | 2.58E-05 |
| AKT3     | 1q43-q44           | 0.230899 | 5.12E-06 | 2.58E-05 |
| SV2B     | 15q26.1            | 0.230887 | 5.12E-06 | 2.59E-05 |
| ATP8B2   | 1q21.3             | 0.230881 | 5.13E-06 | 2.59E-05 |
| IRF4     | 6p25.3             | 0.230692 | 5.22E-06 | 2.63E-05 |
| LTN1     | 21q21.3            | 0.230689 | 5.22E-06 | 2.63E-05 |
| HMCN1    | 1q25.3-q31.1       | 0.230668 | 5.23E-06 | 2.64E-05 |
| CD209    | 19p13.2            | 0.230653 | 5.24E-06 | 2.64E-05 |
| PLK2     | 5q11.2             | 0.230641 | 5.25E-06 | 2.64E-05 |
| C1QTNF7  | 4p15.32            | 0.230615 | 5.26E-06 | 2.65E-05 |
| FADD     | 11q13.3            | -0.23057 | 5.29E-06 | 2.66E-05 |
| GPR141   | 7p14.1             | 0.230557 | 5.29E-06 | 2.66E-05 |
| PEG3     | 19q13.43           | 0.230539 | 5.30E-06 | 2.67E-05 |
| PCYT2    | 17q25.3            | -0.23051 | 5.32E-06 | 2.68E-05 |
| STON1    | 2p16.3             | 0.230505 | 5.32E-06 | 2.68E-05 |
| NKAP     | Xq24               | -0.2305  | 5.32E-06 | 2.68E-05 |
| DPCD     | 10q24.32           | -0.23045 | 5.35E-06 | 2.69E-05 |
|          | 1-Mar 4q32.2-q32.3 | 0.230314 | 5.42E-06 | 2.72E-05 |
| NFYC-AS1 | 1p34.2             | -0.23027 | 5.44E-06 | 2.73E-05 |
| C1ORF174 | 1p36.32            | -0.23027 | 5.44E-06 | 2.73E-05 |
| ETV7     | 6p21.31            | -0.23025 | 5.45E-06 | 2.74E-05 |
| EGLN2    | 19q13.2            | -0.23018 | 5.49E-06 | 2.76E-05 |
| MRPS6    | 21q22.11           | -0.23017 | 5.49E-06 | 2.76E-05 |
| CBWD6    | 9p11.2             | -0.23015 | 5.50E-06 | 2.76E-05 |
| ITGB1BP1 | 2p25.1             | -0.23015 | 5.50E-06 | 2.76E-05 |
| MAN1B1   | 9q34.3             | -0.23008 | 5.54E-06 | 2.78E-05 |
| SLFN12L  | 17q12              | 0.230038 | 5.56E-06 | 2.79E-05 |
| KCTD12   | 13q22.3            | 0.22996  | 5.60E-06 | 2.81E-05 |
| GSN      | 9q33.2             | 0.229936 | 5.62E-06 | 2.82E-05 |
| TSPAN13  | 7p21.1             | 0.229933 | 5.62E-06 | 2.82E-05 |
| LRRC43   | 12q24.31           | -0.22991 | 5.63E-06 | 2.82E-05 |
| VSTM5    | 11q21              | 0.229893 | 5.64E-06 | 2.83E-05 |
| TNFSF14  | 19p13.3            | 0.229854 | 5.66E-06 | 2.84E-05 |
| CLMP     | 11q24.1            | 0.229842 | 5.67E-06 | 2.84E-05 |



|             |               |          |          |          |
|-------------|---------------|----------|----------|----------|
| ANTXR1      | 2p13.3        | 0.229836 | 5.67E-06 | 2.84E-05 |
| GAR1        | 4q25          | -0.22978 | 5.70E-06 | 2.85E-05 |
| CSDE1       | 1p13.2        | 0.22977  | 5.71E-06 | 2.86E-05 |
| BSG         | 19p13.3       | -0.22976 | 5.71E-06 | 2.86E-05 |
| AHR         | 7p21.1        | 0.229751 | 5.72E-06 | 2.86E-05 |
| ATP6V1B2    | 8p21.3        | 0.229738 | 5.73E-06 | 2.86E-05 |
| RAPGEF5     | 7p15.3        | 0.229715 | 5.74E-06 | 2.87E-05 |
| LEMD3       | 12q14.3       | 0.229695 | 5.75E-06 | 2.87E-05 |
| SNRPE       | 1q32.1        | -0.22966 | 5.77E-06 | 2.88E-05 |
| TMEM14B     | 6p24.2        | -0.22965 | 5.77E-06 | 2.88E-05 |
| FAHD2CP     | 2q11.2        | -0.22962 | 5.79E-06 | 2.89E-05 |
| DCLK1       | 13q13.3       | 0.229538 | 5.84E-06 | 2.91E-05 |
| KLHL25      | 15q25.3       | 0.229528 | 5.84E-06 | 2.92E-05 |
| LINC01550   | 14q32.2       | 0.229516 | 5.85E-06 | 2.92E-05 |
| KLF9        | 9q21.12       | 0.229474 | 5.87E-06 | 2.93E-05 |
| FAM131C     | 1p36.13       | -0.22946 | 5.88E-06 | 2.93E-05 |
| PRICKLE1    | 12q12         | 0.229456 | 5.88E-06 | 2.93E-05 |
| NDUFB3      | 2q33.1        | -0.22931 | 5.96E-06 | 2.97E-05 |
| LY9         | 1q23.3        | 0.229311 | 5.96E-06 | 2.97E-05 |
| P2RY14      | 3q25.1        | 0.22927  | 5.99E-06 | 2.98E-05 |
| JAZF1       | 7p15.2-p15.1  | 0.229233 | 6.01E-06 | 2.99E-05 |
| IGF2BP2-AS1 | 3q27.2        | -0.22923 | 6.01E-06 | 2.99E-05 |
| ZNF436      | 1p36.12       | 0.229229 | 6.01E-06 | 2.99E-05 |
| MIB2        | 1p36.33       | -0.22922 | 6.02E-06 | 3.00E-05 |
| SCAP        | 3p21.31       | -0.2292  | 6.03E-06 | 3.00E-05 |
| SNORA68     | 19p13.11      | -0.2292  | 6.03E-06 | 3.00E-05 |
| FAM241B     | 10q22.1       | -0.22914 | 6.06E-06 | 3.02E-05 |
| MBTPS1      | 16q23.3-q24.1 | 0.229115 | 6.08E-06 | 3.02E-05 |
| STK17B      | 2q32.3        | 0.229109 | 6.08E-06 | 3.02E-05 |
| SCUBE2      | 11p15.4       | 0.229079 | 6.10E-06 | 3.03E-05 |
| NRP1        | 10p11.22      | 0.22907  | 6.10E-06 | 3.03E-05 |
| RBX1        | 22q13.2       | -0.22905 | 6.12E-06 | 3.04E-05 |
| SCX         | 8q24.3        | -0.22904 | 6.12E-06 | 3.04E-05 |
| MPRIP       | 17p11.2       | 0.229034 | 6.13E-06 | 3.04E-05 |
| AGR2        | 7p21.1        | 0.229024 | 6.13E-06 | 3.04E-05 |
| KCNMB4      | 12q15         | -0.229   | 6.15E-06 | 3.05E-05 |
| CNTN4       | 3p26.3-p26.2  | 0.228956 | 6.17E-06 | 3.06E-05 |
| VSIG2       | 11q24.2       | 0.228856 | 6.23E-06 | 3.09E-05 |
| SH2D7       | 15q25.1       | 0.228761 | 6.29E-06 | 3.12E-05 |
| LAMA2       | 6q22.33       | 0.228734 | 6.30E-06 | 3.13E-05 |
| LY6G5B      | 6p21.33       | -0.22871 | 6.32E-06 | 3.13E-05 |
| INSYN2B     | 5q35.1        | 0.228691 | 6.33E-06 | 3.14E-05 |
| BCCIP       | 10q26.2       | -0.22866 | 6.35E-06 | 3.15E-05 |
| C22ORF46    | 22q13.2       | 0.228655 | 6.35E-06 | 3.15E-05 |
| LYG1        | 2q11.2        | -0.22862 | 6.37E-06 | 3.16E-05 |
| PNMA1       | 14q24.3       | 0.228615 | 6.38E-06 | 3.16E-05 |
| RHBDL3      | 17q11.2       | 0.228588 | 6.39E-06 | 3.16E-05 |
| ZNF3        | 7q22.1        | -0.22856 | 6.41E-06 | 3.17E-05 |
| INSR        | 19p13.2       | 0.228503 | 6.44E-06 | 3.19E-05 |
| ABHD1       | 2p23.3        | -0.22848 | 6.46E-06 | 3.19E-05 |
| BIRC2       | 11q22.2       | 0.228462 | 6.47E-06 | 3.20E-05 |
| ZC3H11A     | 1q32.1        | 0.228435 | 6.49E-06 | 3.21E-05 |
| ATP6VOC     | 16p13.3       | -0.22838 | 6.52E-06 | 3.22E-05 |
| PTGS1       | 9q33.2        | 0.22836  | 6.53E-06 | 3.23E-05 |
| SELL        | 1q24.2        | 0.228355 | 6.54E-06 | 3.23E-05 |
| EVC         | 4p16.2        | 0.228353 | 6.54E-06 | 3.23E-05 |
| HABP4       | 9q22.32       | -0.22835 | 6.54E-06 | 3.23E-05 |
| TMX1        | 14q22.1       | 0.228304 | 6.57E-06 | 3.24E-05 |

|              |                 |          |          |          |
|--------------|-----------------|----------|----------|----------|
| COL12A1      | 6q13-q14.1      | 0.228296 | 6.57E-06 | 3.24E-05 |
| PLAC8L1      | 5q32            | -0.22829 | 6.58E-06 | 3.24E-05 |
| CCHCR1       | 6p21.33         | -0.22826 | 6.60E-06 | 3.25E-05 |
| ZNF860       | 3p23-p22.3      | 0.228228 | 6.62E-06 | 3.26E-05 |
| VSIG1        | Xq22.3          | 0.228222 | 6.62E-06 | 3.26E-05 |
| C7ORF25      | 7p14.1          | -0.22821 | 6.62E-06 | 3.27E-05 |
| DLG2         | 11q14.1         | 0.228184 | 6.64E-06 | 3.27E-05 |
| LUC7L3       | 17q21.33        | -0.22818 | 6.64E-06 | 3.27E-05 |
| SPON1        | 11p15.2         | 0.22816  | 6.66E-06 | 3.28E-05 |
| SPATA2       | 20q13.13        | -0.2281  | 6.70E-06 | 3.30E-05 |
| ST6GALNAC1   | 17q25.1         | 0.228083 | 6.71E-06 | 3.30E-05 |
| PICK1        | 22q13.1         | -0.22804 | 6.74E-06 | 3.31E-05 |
| TTI1         | 20q11.23        | -0.22803 | 6.74E-06 | 3.32E-05 |
| SDCBP        | 8q12.1          | 0.228024 | 6.75E-06 | 3.32E-05 |
| KHDRBS3      | 8q24.23         | -0.228   | 6.76E-06 | 3.32E-05 |
| C17ORF75     | 17q11.2         | -0.22798 | 6.77E-06 | 3.33E-05 |
| RNF187       | 1q42.13         | -0.22796 | 6.79E-06 | 3.34E-05 |
| TMEM178A     | 2p22.1          | -0.22795 | 6.80E-06 | 3.34E-05 |
| SCNN1D       | 1p36.33         | -0.22794 | 6.80E-06 | 3.34E-05 |
| NUDCD2       | 5q34            | -0.22792 | 6.81E-06 | 3.35E-05 |
| TAF3         | 10p14           | 0.227907 | 6.82E-06 | 3.35E-05 |
| ALCAM        | 3q13.11         | 0.22778  | 6.91E-06 | 3.39E-05 |
| UGP2         | 2p15            | 0.227774 | 6.91E-06 | 3.39E-05 |
| TENT5C       | 1p12            | 0.22776  | 6.92E-06 | 3.40E-05 |
| FPR3         | 19q13.41        | 0.227732 | 6.94E-06 | 3.40E-05 |
| KLF6         | 10p15.2         | 0.227729 | 6.94E-06 | 3.40E-05 |
| RPL13AP6     | 10q25.2         | -0.22773 | 6.94E-06 | 3.40E-05 |
| SULT1B1      | 4q13.3          | 0.227726 | 6.94E-06 | 3.40E-05 |
| NUDT7        | 16q23.1         | -0.22765 | 6.99E-06 | 3.43E-05 |
| STX4         | 16p11.2         | -0.22764 | 7.00E-06 | 3.43E-05 |
| CNKS2        | Xp22.12         | 0.227601 | 7.02E-06 | 3.44E-05 |
| TTLL7        | 1p31.1          | 0.227581 | 7.04E-06 | 3.45E-05 |
| SLFN11       | 17q12           | 0.227578 | 7.04E-06 | 3.45E-05 |
| CXORF40B     | Xq28            | -0.22757 | 7.04E-06 | 3.45E-05 |
| TSHZ1        | 18q22.3         | 0.227555 | 7.06E-06 | 3.45E-05 |
| PCED1A       | 20p13           | -0.22755 | 7.06E-06 | 3.45E-05 |
| SELENOS      | 15q26.3         | 0.227544 | 7.06E-06 | 3.45E-05 |
| ARRB2        | 17p13.2         | -0.22754 | 7.06E-06 | 3.46E-05 |
| ECI1         | 16p13.3         | -0.22753 | 7.07E-06 | 3.46E-05 |
| RAB35        | 12q24.23        | 0.227521 | 7.08E-06 | 3.46E-05 |
| PGAP1        | 2q33.1          | 0.227497 | 7.09E-06 | 3.47E-05 |
| ETFBKMT      | 12p11.21        | 0.227495 | 7.10E-06 | 3.47E-05 |
| HIST1H4C     | 6p22.2          | -0.22749 | 7.10E-06 | 3.47E-05 |
| GP3M3        | 6p21.32         | 0.227453 | 7.12E-06 | 3.48E-05 |
| NOP56        | 20p13           | -0.22743 | 7.14E-06 | 3.49E-05 |
| EIF2B5       | 3q27.1          | -0.22743 | 7.14E-06 | 3.49E-05 |
| EPB41L4A-AS1 | 5q22.1          | -0.22738 | 7.18E-06 | 3.50E-05 |
| PIEZO2       | 18p11.22-p11.21 | 0.227374 | 7.18E-06 | 3.50E-05 |
| RABGGTB      | 1p31.1          | -0.22736 | 7.19E-06 | 3.50E-05 |
| CAVIN2       | 2q32.3          | 0.227248 | 7.26E-06 | 3.54E-05 |
| VPS26C       | 21q22.13        | 0.227224 | 7.28E-06 | 3.55E-05 |
| ZNF74        | 22q11.21        | -0.22722 | 7.28E-06 | 3.55E-05 |
| PFDN1        | 5q31.3          | -0.22721 | 7.29E-06 | 3.55E-05 |
| PAICS        | 4q12            | -0.2272  | 7.30E-06 | 3.56E-05 |
| LIMCH1       | 4p13            | 0.227168 | 7.32E-06 | 3.56E-05 |
| GRK6         | 5q35.3          | -0.22717 | 7.32E-06 | 3.56E-05 |
| DOK6         | 18q22.2         | 0.22716  | 7.33E-06 | 3.57E-05 |
| XPA          | 9q22.33         | -0.22715 | 7.33E-06 | 3.57E-05 |

|           |                    |          |          |          |
|-----------|--------------------|----------|----------|----------|
| BMP3      | 4q21.21            | 0.22714  | 7.34E-06 | 3.57E-05 |
| UQCR10    | 22q12.2            | -0.22711 | 7.36E-06 | 3.58E-05 |
| TCF7      | 5q31.1             | -0.22708 | 7.38E-06 | 3.59E-05 |
| LOC441204 | 7p15.2             | 0.227016 | 7.43E-06 | 3.61E-05 |
| DNAJC10   | 2q32.1             | 0.226987 | 7.45E-06 | 3.62E-05 |
| METTL3    | 14q11.2            | -0.22698 | 7.45E-06 | 3.62E-05 |
| AKAP17A   | Xp22.33 and Yp11.2 | -0.22698 | 7.45E-06 | 3.62E-05 |
| GFRA2     | 8p21.3             | 0.226972 | 7.46E-06 | 3.62E-05 |
| CD93      | 20p11.21           | 0.226928 | 7.49E-06 | 3.64E-05 |
| LINC00479 | 21q22.3            | -0.22693 | 7.49E-06 | 3.64E-05 |
| RBMS3     | 3p24.1             | 0.226908 | 7.50E-06 | 3.64E-05 |
| COQ4      | 9q34.11            | -0.22689 | 7.52E-06 | 3.65E-05 |
| ULK4P3    | 15q13.2            | 0.226888 | 7.52E-06 | 3.65E-05 |
| CPLANE1   | 5p13.2             | 0.226869 | 7.53E-06 | 3.65E-05 |
| CD53      | 1p13.3             | 0.226862 | 7.54E-06 | 3.65E-05 |
| TMEM41A   | 3q27.2             | -0.2268  | 7.58E-06 | 3.68E-05 |
| ARHGEF3   | 3p14.3             | 0.226748 | 7.62E-06 | 3.69E-05 |
| C20ORF194 | 20p13              | 0.226738 | 7.62E-06 | 3.69E-05 |
| ACSS1     | 20p11.21           | -0.22671 | 7.65E-06 | 3.70E-05 |
| SEC11A    | 15q25.2-q25.3      | 0.226706 | 7.65E-06 | 3.70E-05 |
| JOSD1     | 22q13.1            | 0.226635 | 7.70E-06 | 3.73E-05 |
| CEL       | 9q34.13            | -0.22656 | 7.75E-06 | 3.75E-05 |
| PLBD2     | 12q24.13           | 0.226552 | 7.76E-06 | 3.76E-05 |
| WDR27     | 6q27               | -0.22654 | 7.77E-06 | 3.76E-05 |
| CALML6    | 1p36.33            | -0.22652 | 7.78E-06 | 3.76E-05 |
| ASH1L-AS1 | 1q22               | -0.22651 | 7.79E-06 | 3.77E-05 |
| BRSK2     | 11p15.5            | -0.22651 | 7.79E-06 | 3.77E-05 |
| CDK19     | 6q21               | 0.226485 | 7.81E-06 | 3.78E-05 |
| ZNF430    | 19p12              | 0.226483 | 7.81E-06 | 3.78E-05 |
| SCML2     | Xp22.13            | -0.22643 | 7.85E-06 | 3.80E-05 |
| MMRN2     | 10q23.2            | 0.2264   | 7.87E-06 | 3.80E-05 |
| TLNRD1    | 15q25.1            | 0.226309 | 7.94E-06 | 3.83E-05 |
| BPHL      | 6p25.2             | -0.22631 | 7.94E-06 | 3.83E-05 |
| LAMA4     | 6q21               | 0.226302 | 7.95E-06 | 3.84E-05 |
| TMEM116   | 12q24.12-q24.13    | -0.2263  | 7.95E-06 | 3.84E-05 |
| RET       | 10q11.21           | 0.226282 | 7.96E-06 | 3.84E-05 |
| SAT2      | 17p13.1            | -0.22627 | 7.97E-06 | 3.84E-05 |
| HINT3     | 6q22.32            | 0.226255 | 7.98E-06 | 3.85E-05 |
| TGIF2     | 20q11.23           | -0.22622 | 8.01E-06 | 3.86E-05 |
| CARNMT1   | 9q21.13            | 0.226214 | 8.01E-06 | 3.86E-05 |
| ZMIZ2     | 7p13               | -0.22621 | 8.02E-06 | 3.86E-05 |
| ATP10D    | 4p12               | 0.22619  | 8.03E-06 | 3.87E-05 |
| ZNF77     | 19p13.3            | -0.22617 | 8.05E-06 | 3.88E-05 |
| ADAMDEC1  | 8p21.2             | 0.226043 | 8.14E-06 | 3.92E-05 |
| COL14A1   | 8q24.12            | 0.226037 | 8.15E-06 | 3.92E-05 |
| STK16     | 2q35               | -0.22603 | 8.15E-06 | 3.92E-05 |
| ASPM      | 1q31.3             | 0.226021 | 8.16E-06 | 3.93E-05 |
| SUMF2     | 7p11.2             | -0.22602 | 8.16E-06 | 3.93E-05 |
| ANXA2     | 15q22.2            | 0.226002 | 8.18E-06 | 3.93E-05 |
| MEPCE     | 7q22.1             | -0.226   | 8.18E-06 | 3.93E-05 |
| GTF3C4    | 9q34.13            | 0.225961 | 8.21E-06 | 3.95E-05 |
| REG4      | 1p12               | 0.225937 | 8.23E-06 | 3.95E-05 |
| NUP153    | 6p22.3             | 0.225929 | 8.23E-06 | 3.96E-05 |
| THUMPD2   | 2p22.1 2p22-p21    | -0.22592 | 8.24E-06 | 3.96E-05 |
| STARD8    | Xq13.1             | 0.225917 | 8.24E-06 | 3.96E-05 |
| CCDC33    | 15q24.1            | 0.225863 | 8.28E-06 | 3.98E-05 |
| HGF       | 7q21.11            | 0.225847 | 8.30E-06 | 3.98E-05 |
| ZNF33A    | 10p11.1            | 0.225832 | 8.31E-06 | 3.99E-05 |

|           |                |          |          |          |
|-----------|----------------|----------|----------|----------|
| WRN       | 8p12           | 0.225772 | 8.36E-06 | 4.01E-05 |
| RSAD1     | 17q21.33       | -0.22576 | 8.36E-06 | 4.01E-05 |
| ARHGAP24  | 4q21.23-q21.3  | 0.225747 | 8.38E-06 | 4.02E-05 |
| LOC143188 | 10q25.2        | -0.22573 | 8.39E-06 | 4.02E-05 |
| FECH      | 18q21.31       | 0.225723 | 8.39E-06 | 4.02E-05 |
| CLPSL2    | 6p21.31        | -0.22563 | 8.47E-06 | 4.06E-05 |
| SNX30     | 9q32           | 0.225617 | 8.48E-06 | 4.06E-05 |
| RBCK1     | 20p13          | -0.22557 | 8.52E-06 | 4.08E-05 |
| TMEM53    | 1p34.1         | -0.22549 | 8.58E-06 | 4.11E-05 |
| KRT32     | 17q21.2        | -0.22546 | 8.61E-06 | 4.12E-05 |
| THUMPD1   | 16p12.3        | 0.225451 | 8.61E-06 | 4.12E-05 |
| SPEN      | 1p36.21-p36.13 | 0.225433 | 8.63E-06 | 4.13E-05 |
| CMTM7     | 3p22.3         | -0.22541 | 8.65E-06 | 4.14E-05 |
| MICAL3    | 22q11.21       | 0.225375 | 8.67E-06 | 4.15E-05 |
| SBF2      | 11p15.4        | 0.225374 | 8.68E-06 | 4.15E-05 |
| EGLN3     | 14q13.1        | 0.225359 | 8.69E-06 | 4.15E-05 |
| EPO       | 7q22.1         | -0.22536 | 8.69E-06 | 4.15E-05 |
| ARHGEF19  | 1p36.13        | -0.22534 | 8.70E-06 | 4.16E-05 |
| MSI2      | 17q22          | 0.225317 | 8.72E-06 | 4.17E-05 |
| GOPC      | 6q22.1         | 0.225315 | 8.72E-06 | 4.17E-05 |
| PXDN      | 2p25.3         | 0.225309 | 8.73E-06 | 4.17E-05 |
| RBM8A     | 1q21.1         | 0.225286 | 8.75E-06 | 4.18E-05 |
| PDGFRA    | 4q12           | 0.225236 | 8.79E-06 | 4.19E-05 |
| UROS      | 10q26.2        | -0.22523 | 8.80E-06 | 4.20E-05 |
| CYTOR     | 2p11.2         | -0.22522 | 8.80E-06 | 4.20E-05 |
| C12ORF65  | 12q24.31       | -0.22519 | 8.82E-06 | 4.21E-05 |
| NKRF      | Xq24           | -0.22518 | 8.83E-06 | 4.21E-05 |
| IRAK3     | 12q14.3        | 0.225177 | 8.84E-06 | 4.21E-05 |
| CD22      | 19q13.12       | 0.225106 | 8.90E-06 | 4.24E-05 |
| GAS8      | 16q24.3        | -0.2251  | 8.90E-06 | 4.24E-05 |
| FCHSD2    | 11q13.4        | 0.225049 | 8.95E-06 | 4.26E-05 |
| POMGNT2   | 3p22.1         | -0.22504 | 8.95E-06 | 4.26E-05 |
| TRAPPC1   | 17p13.1        | -0.22504 | 8.95E-06 | 4.26E-05 |
| SEC22B    | 1p12           | 0.225034 | 8.96E-06 | 4.26E-05 |
| ATP5PF    | 21q21.3        | -0.22499 | 9.00E-06 | 4.28E-05 |
| TIRAP     | 11q24.2        | 0.224971 | 9.01E-06 | 4.29E-05 |
| NSF       | 17q21.31       | 0.224951 | 9.03E-06 | 4.29E-05 |
| DPH6      | 15q14          | -0.22492 | 9.05E-06 | 4.30E-05 |
| ZNF521    | 18q11.2        | 0.224881 | 9.09E-06 | 4.32E-05 |
| THAP4     | 2q37.3         | -0.22486 | 9.11E-06 | 4.33E-05 |
| PYCR2     | 1q42.12        | -0.22478 | 9.17E-06 | 4.36E-05 |
| FGA       | 4q31.3         | -0.22477 | 9.18E-06 | 4.36E-05 |
| C20ORF96  | 20p13          | -0.22477 | 9.19E-06 | 4.36E-05 |
| FNBP1L    | 1p22.1         | 0.224721 | 9.23E-06 | 4.38E-05 |
| GLUD2     | Xq24           | 0.224708 | 9.24E-06 | 4.39E-05 |
| RPS4X     | Xq13.1         | -0.2247  | 9.24E-06 | 4.39E-05 |
| RIN3      | 14q32.12       | 0.224664 | 9.27E-06 | 4.40E-05 |
| C3AR1     | 12p13.31       | 0.224662 | 9.28E-06 | 4.40E-05 |
| POLA2     | 11q13.1        | -0.22458 | 9.35E-06 | 4.43E-05 |
| SNRPGP15  | 19p13.12       | -0.22457 | 9.35E-06 | 4.44E-05 |
| PEMT      | 17p11.2        | -0.22456 | 9.37E-06 | 4.44E-05 |
| ECSIT     | 19p13.2        | -0.22454 | 9.38E-06 | 4.45E-05 |
| CBY1      | 22q13.1        | -0.22452 | 9.40E-06 | 4.46E-05 |
| GBP3      | 1p22.2         | 0.22449  | 9.43E-06 | 4.47E-05 |
| SYNE3     | 14q32.13       | 0.224486 | 9.43E-06 | 4.47E-05 |
| KATNBL1   | 15q14          | 0.224455 | 9.46E-06 | 4.48E-05 |
| RAB30     | 11q14.1        | 0.224439 | 9.47E-06 | 4.48E-05 |
| SLC6A4    | 17q11.2        | -0.22444 | 9.47E-06 | 4.48E-05 |

|              |                 |          |          |          |
|--------------|-----------------|----------|----------|----------|
| C6ORF226     | 6p21.1          | -0.2244  | 9.51E-06 | 4.50E-05 |
| PCDHB4       | 5q31.3          | 0.224396 | 9.51E-06 | 4.50E-05 |
| MTFP1        | 22q12.2         | -0.22439 | 9.52E-06 | 4.50E-05 |
| SSTR1        | 14q21.1         | 0.224337 | 9.56E-06 | 4.52E-05 |
| NLGN4X       | Xp22.32-p22.31  | 0.224296 | 9.60E-06 | 4.54E-05 |
| ITGB6        | 2q24.2          | 0.224281 | 9.61E-06 | 4.54E-05 |
| BRD3OS       | 9q34.2          | -0.22423 | 9.66E-06 | 4.57E-05 |
| BLOC1S4      | 4p16.1          | -0.22422 | 9.67E-06 | 4.57E-05 |
| OMP          | 11q13.5         | -0.2242  | 9.69E-06 | 4.58E-05 |
| AGER         | 6p21.32         | -0.22419 | 9.69E-06 | 4.58E-05 |
| ASF1B        | 19p13.12        | -0.22418 | 9.71E-06 | 4.58E-05 |
| HLCS         | 21q22.13        | 0.224064 | 9.81E-06 | 4.63E-05 |
| ASIC1        | 12q13.12        | -0.22403 | 9.85E-06 | 4.65E-05 |
| TP63         | 3q28            | 0.224007 | 9.86E-06 | 4.65E-05 |
| ALKBH5       | 17p11.2 17p11.2 | 0.223998 | 9.87E-06 | 4.66E-05 |
| HYAL1        | 3p21.31         | 0.22398  | 9.89E-06 | 4.66E-05 |
| AP3S2        | 15q26.1         | 0.223958 | 9.91E-06 | 4.67E-05 |
| MIA2         | 14q21.1         | 0.223907 | 9.96E-06 | 4.69E-05 |
| PEX11A       | 15q26.1         | 0.223855 | 1.00E-05 | 4.72E-05 |
| SLFN12       | 17q12           | 0.223834 | 1.00E-05 | 4.72E-05 |
| GADD45G      | 9q22.2          | -0.22383 | 1.00E-05 | 4.73E-05 |
| KBTBD4       | 11p11.2         | 0.223735 | 1.01E-05 | 4.76E-05 |
| OSGIN1       | 16q23.3         | -0.22372 | 1.01E-05 | 4.77E-05 |
| LDHAL6B      | 15q22.2         | 0.223713 | 1.01E-05 | 4.77E-05 |
| HAX1         | 1q21.3          | -0.22367 | 1.02E-05 | 4.79E-05 |
| NBEA         | 13q13.3         | 0.223667 | 1.02E-05 | 4.79E-05 |
| RNF180       | 5q12.3          | 0.223649 | 1.02E-05 | 4.80E-05 |
| PTCHD1       | Xp22.11         | 0.223607 | 1.02E-05 | 4.82E-05 |
| HIF1AN       | 10q24.31        | 0.223605 | 1.02E-05 | 4.82E-05 |
| ME3          | 11q14.2         | -0.22359 | 1.03E-05 | 4.82E-05 |
| ZNF581       | 19q13.42        | -0.22358 | 1.03E-05 | 4.83E-05 |
| LRRTM2       | 5q31.2          | 0.223508 | 1.03E-05 | 4.86E-05 |
| ARFGAP2      | 11p11.2         | -0.2235  | 1.03E-05 | 4.86E-05 |
| LGALS7       | 19q13.2         | -0.22345 | 1.04E-05 | 4.88E-05 |
| PPP2R3A      | 3q22.2-q22.3    | 0.223267 | 1.06E-05 | 4.96E-05 |
| GALNT4       | 12q21.33        | 0.223257 | 1.06E-05 | 4.97E-05 |
| AGGF1        | 5q13.3          | 0.223188 | 1.06E-05 | 5.00E-05 |
| MZT2A        | 2q21.1          | -0.22315 | 1.07E-05 | 5.02E-05 |
| CCDC85A      | 2p16.1          | 0.223136 | 1.07E-05 | 5.02E-05 |
| PIF1         | 15q22.31        | -0.22313 | 1.07E-05 | 5.02E-05 |
| SSB          | 2q31.1          | -0.22311 | 1.07E-05 | 5.03E-05 |
| METAP1D      | 2q31.1          | -0.22309 | 1.07E-05 | 5.04E-05 |
| MSX1         | 4p16.2          | -0.22308 | 1.08E-05 | 5.04E-05 |
| IL10RA       | 11q23.3         | 0.223079 | 1.08E-05 | 5.04E-05 |
| NT5C2        | 10q24.32-q24.33 | 0.223075 | 1.08E-05 | 5.04E-05 |
| NRN1L        | 16q22.1         | -0.22306 | 1.08E-05 | 5.04E-05 |
| BORCS5       | 12p13.2         | -0.22306 | 1.08E-05 | 5.05E-05 |
| GPAA1        | 8q24.3          | -0.22306 | 1.08E-05 | 5.05E-05 |
| MTMR12       | 5p13.3          | 0.223016 | 1.08E-05 | 5.06E-05 |
| OLFM1        | 9q34.3          | 0.223013 | 1.08E-05 | 5.06E-05 |
| RHBG         | 1q22            | -0.22299 | 1.09E-05 | 5.07E-05 |
| PFKFB2       | 1q32.1          | 0.222983 | 1.09E-05 | 5.08E-05 |
| CCDC78       | 16p13.3         | -0.22294 | 1.09E-05 | 5.09E-05 |
| FBXO21       | 12q24.22        | 0.222881 | 1.10E-05 | 5.12E-05 |
| LOC100132287 | 1p36.33         | -0.22287 | 1.10E-05 | 5.13E-05 |
| PYGO1        | 15q21.3         | 0.222857 | 1.10E-05 | 5.13E-05 |
| KPNA5        | 6q22.1          | 0.22283  | 1.10E-05 | 5.14E-05 |
| POU5F1       | 6p21.33         | -0.22283 | 1.10E-05 | 5.14E-05 |

|          |          |          |          |          |
|----------|----------|----------|----------|----------|
| NFX1     | 9p13.3   | 0.222826 | 1.10E-05 | 5.14E-05 |
| LRP1     | 12q13.3  | 0.222758 | 1.11E-05 | 5.17E-05 |
| C17ORF58 | 17q24.2  | -0.22274 | 1.11E-05 | 5.18E-05 |
| RIMBP3C  | 22q11.21 | 0.222658 | 1.12E-05 | 5.22E-05 |
| TRIM2    | 4q31.3   | 0.22263  | 1.12E-05 | 5.23E-05 |
| SLC38A2  | 12q13.11 | 0.222627 | 1.12E-05 | 5.23E-05 |
| CDK14    | 7q21.13  | 0.222567 | 1.13E-05 | 5.26E-05 |
| UQCRBP1  | Xp11.21  | -0.22256 | 1.13E-05 | 5.26E-05 |
| UBE2D4   | 7p13     | -0.22255 | 1.13E-05 | 5.27E-05 |
| PADI2    | 1p36.13  | 0.222519 | 1.13E-05 | 5.28E-05 |
| SNED1    | 2q37.3   | 0.222495 | 1.14E-05 | 5.29E-05 |
| RMDN3    | 15q15.1  | 0.222463 | 1.14E-05 | 5.31E-05 |
| PCDH17   | 13q21.1  | 0.222453 | 1.14E-05 | 5.31E-05 |
| RPN1     | 3q21.3   | -0.22245 | 1.14E-05 | 5.31E-05 |
| KLHL31   | 6p12.1   | -0.22243 | 1.14E-05 | 5.32E-05 |
| PCDH7    | 4p15.1   | 0.222418 | 1.14E-05 | 5.32E-05 |
| ZNF532   | 18q21.32 | 0.2224   | 1.15E-05 | 5.33E-05 |
| GALE     | 1p36.11  | -0.22239 | 1.15E-05 | 5.34E-05 |
| USP16    | 21q21.3  | 0.222332 | 1.15E-05 | 5.36E-05 |
| KBTBD7   | 13q14.11 | 0.222299 | 1.16E-05 | 5.38E-05 |
| MCC      | 5q22.2   | 0.222274 | 1.16E-05 | 5.39E-05 |
| ADAM6    | 14q32.33 | 0.222265 | 1.16E-05 | 5.39E-05 |
| RNF103   | 2p11.2   | 0.222226 | 1.16E-05 | 5.41E-05 |
| NFATC2   | 20q13.2  | 0.222225 | 1.16E-05 | 5.41E-05 |
| SLA      | 8q24.22  | 0.222166 | 1.17E-05 | 5.44E-05 |
| RPS26    | 12q13.2  | -0.22216 | 1.17E-05 | 5.44E-05 |
| RAB4B    | 19q13.2  | -0.22213 | 1.17E-05 | 5.45E-05 |
| CAPRIN1  | 11p13    | 0.22211  | 1.18E-05 | 5.46E-05 |
| PNO1     | 2p14     | -0.22211 | 1.18E-05 | 5.46E-05 |
| FLOT1    | 6p21.33  | -0.22211 | 1.18E-05 | 5.46E-05 |
| VPS33B   | 15q26.1  | 0.222091 | 1.18E-05 | 5.47E-05 |
| SFXN5    | 2p13.2   | -0.22209 | 1.18E-05 | 5.47E-05 |
| LMNA     | 1q22     | 0.222076 | 1.18E-05 | 5.47E-05 |
| WDR82    | 3p21.2   | 0.221971 | 1.19E-05 | 5.53E-05 |
| AKAP6    | 14q12    | 0.221964 | 1.19E-05 | 5.53E-05 |
| CHST15   | 10q26.13 | 0.221949 | 1.20E-05 | 5.53E-05 |
| IMPDH1   | 7q32.1   | -0.22194 | 1.20E-05 | 5.54E-05 |
| ARAP2    | 4p14     | 0.221924 | 1.20E-05 | 5.54E-05 |
| STX6     | 1q25.3   | 0.221904 | 1.20E-05 | 5.55E-05 |
| ANXA2P1  | 4q31.3   | 0.221896 | 1.20E-05 | 5.56E-05 |
| AIFM1    | Xq26.1   | -0.22189 | 1.20E-05 | 5.56E-05 |
| CZIB     | 1p32.3   | -0.22189 | 1.20E-05 | 5.56E-05 |
| GOLT1A   | 1q32.1   | -0.22188 | 1.20E-05 | 5.56E-05 |
| STK11IP  | 2q35     | -0.22188 | 1.20E-05 | 5.56E-05 |
| CGNL1    | 15q21.3  | 0.221861 | 1.20E-05 | 5.57E-05 |
| ZNF611   | 19q13.41 | 0.221824 | 1.21E-05 | 5.59E-05 |
| VAMP8    | 2p11.2   | -0.22181 | 1.21E-05 | 5.59E-05 |
| STARD4   | 5q22.1   | 0.221803 | 1.21E-05 | 5.59E-05 |
| RPL23P8  | 7p21.1   | -0.2217  | 1.22E-05 | 5.65E-05 |
| PDGFC    | 4q32.1   | 0.221696 | 1.22E-05 | 5.65E-05 |
| SYT16    | 14q23.2  | 0.221688 | 1.22E-05 | 5.65E-05 |
| ABCA9    | 17q24.2  | 0.221666 | 1.23E-05 | 5.66E-05 |
| RPN2     | 20q11.23 | -0.22165 | 1.23E-05 | 5.67E-05 |
| EIF4G1   | 3q27.1   | 0.221641 | 1.23E-05 | 5.67E-05 |
| BMPR1B   | 4q22.3   | 0.221633 | 1.23E-05 | 5.67E-05 |
| VAPA     | 18p11.22 | 0.221565 | 1.24E-05 | 5.71E-05 |
| CCDC17   | 1p34.1   | -0.22155 | 1.24E-05 | 5.71E-05 |
| TSPYL5   | 8q22.1   | 0.221553 | 1.24E-05 | 5.71E-05 |

|           |             |          |          |          |
|-----------|-------------|----------|----------|----------|
| GCOM1     | 15q21.3     | 0.221531 | 1.24E-05 | 5.72E-05 |
| FAM32A    | 19p13.11    | -0.22152 | 1.24E-05 | 5.73E-05 |
| MRPL49    | 11q13.1     | -0.22149 | 1.25E-05 | 5.74E-05 |
| OGT       | Xq13.1      | -0.22147 | 1.25E-05 | 5.75E-05 |
| PRRG4     | 11p13       | 0.221465 | 1.25E-05 | 5.75E-05 |
| EIF4E2    | 2q37.1      | -0.22145 | 1.25E-05 | 5.76E-05 |
| CDC14A    | 1p21.2      | 0.221441 | 1.25E-05 | 5.76E-05 |
| MYOT      | 5q31.2      | 0.221419 | 1.26E-05 | 5.77E-05 |
| SLC4A4    | 4q13.3      | 0.221404 | 1.26E-05 | 5.78E-05 |
| SLC25A46  | 5q22.1      | 0.221358 | 1.26E-05 | 5.80E-05 |
| SLC35F6   | 2p23.3      | -0.22126 | 1.27E-05 | 5.86E-05 |
| TRAPPC10  | 21q22.3     | 0.221197 | 1.28E-05 | 5.89E-05 |
| ZDHHC2    | 8p22        | 0.221157 | 1.29E-05 | 5.91E-05 |
| F10       | 13q34       | -0.2211  | 1.29E-05 | 5.94E-05 |
| KDR       | 4q12        | 0.221096 | 1.29E-05 | 5.94E-05 |
| SNX19     | 11q24.3-q25 | 0.221084 | 1.29E-05 | 5.94E-05 |
| B3GNT6    | 11q13.5     | 0.221021 | 1.30E-05 | 5.98E-05 |
| ZC3H14    | 14q31.3     | 0.221015 | 1.30E-05 | 5.98E-05 |
| MAP3K21   | 1q42.2      | 0.221011 | 1.30E-05 | 5.98E-05 |
| TAF9      | 5q13.2      | -0.22097 | 1.31E-05 | 6.00E-05 |
| OAF       | 11q23.3     | -0.22094 | 1.31E-05 | 6.02E-05 |
| MED25     | 19q13.33    | -0.22094 | 1.31E-05 | 6.02E-05 |
| TM6SF1    | 15q25.2     | 0.220902 | 1.32E-05 | 6.03E-05 |
| HRH2      | 5q35.2      | 0.22085  | 1.32E-05 | 6.06E-05 |
| ARID5B    | 10q21.2     | 0.220839 | 1.32E-05 | 6.07E-05 |
| PA2G4P4   | 3q25.31     | -0.22083 | 1.33E-05 | 6.07E-05 |
| B2M       | 15q21.1     | 0.220825 | 1.33E-05 | 6.07E-05 |
| KIF14     | 1q32.1      | 0.220812 | 1.33E-05 | 6.08E-05 |
| PDHA1     | Xp22.12     | -0.22081 | 1.33E-05 | 6.08E-05 |
| CKS1B     | 1q21.3      | -0.22081 | 1.33E-05 | 6.08E-05 |
| ABCB6     | 2q35        | -0.2208  | 1.33E-05 | 6.08E-05 |
| CLSTN1    | 1p36.22     | 0.220739 | 1.34E-05 | 6.11E-05 |
| CYBRD1    | 2q31.1      | 0.220733 | 1.34E-05 | 6.12E-05 |
| HELB      | 12q14.3 12q | 0.220721 | 1.34E-05 | 6.12E-05 |
| GEMIN8    | Xp22.2      | -0.22067 | 1.35E-05 | 6.15E-05 |
| FAT3      | 11q14.3     | 0.220667 | 1.35E-05 | 6.15E-05 |
| APBB2     | 4p14-p13    | 0.220624 | 1.35E-05 | 6.17E-05 |
| MTHFSD    | 16q24.1     | -0.22057 | 1.36E-05 | 6.20E-05 |
| COPS8     | 2q37.3      | -0.22056 | 1.36E-05 | 6.20E-05 |
| CNTRL     | 9q33.2      | 0.220555 | 1.36E-05 | 6.21E-05 |
| LRRC37A4P | 17q21.31    | 0.220552 | 1.36E-05 | 6.21E-05 |
| ILVBL     | 19p13.12    | -0.22053 | 1.36E-05 | 6.22E-05 |
| SIGLEC5   | 19q13.41    | 0.220516 | 1.36E-05 | 6.23E-05 |
| BIN2      | 12q13.13    | 0.22047  | 1.37E-05 | 6.25E-05 |
| CRYBG1    | 6q21        | 0.220425 | 1.38E-05 | 6.27E-05 |
| CENPV     | 17p11.2     | -0.22041 | 1.38E-05 | 6.28E-05 |
| MAP1A     | 15q15.3     | 0.220387 | 1.38E-05 | 6.29E-05 |
| KLF2      | 19p13.11    | 0.220359 | 1.38E-05 | 6.31E-05 |
| PYCARD    | 16p11.2     | -0.22034 | 1.39E-05 | 6.32E-05 |
| PRPF6     | 20q13.33    | -0.2203  | 1.39E-05 | 6.34E-05 |
| RIPK1     | 6p25.2      | 0.2203   | 1.39E-05 | 6.34E-05 |
| SLC25A38  | 3p22.1      | -0.22027 | 1.40E-05 | 6.36E-05 |
| CYP2W1    | 7p22.3      | -0.22024 | 1.40E-05 | 6.37E-05 |
| KRTAP5-1  | 11p15.5     | -0.22023 | 1.40E-05 | 6.38E-05 |
| VSIR      | 10q22.1     | 0.220211 | 1.40E-05 | 6.39E-05 |
| PARVA     | 11p15.3     | 0.220185 | 1.41E-05 | 6.40E-05 |
| LRRC23    | 12p13.31    | -0.22017 | 1.41E-05 | 6.41E-05 |
| LY6G6F    | 6p21.33     | -0.22014 | 1.41E-05 | 6.42E-05 |

|          |              |          |          |          |
|----------|--------------|----------|----------|----------|
| CTC1     | 17p13.1      | 0.220125 | 1.41E-05 | 6.43E-05 |
| FANCL    | 2p16.1       | -0.2201  | 1.42E-05 | 6.44E-05 |
| CXORF21  | Xp21.2       | 0.219981 | 1.43E-05 | 6.51E-05 |
| GOLGA1   | 9q33.3       | 0.219974 | 1.43E-05 | 6.52E-05 |
| ZNF212   | 7q36.1       | -0.21996 | 1.44E-05 | 6.53E-05 |
| THRSP    | 11q14.1      | -0.21992 | 1.44E-05 | 6.55E-05 |
| SLCO4A1  | 20q13.33     | -0.21988 | 1.45E-05 | 6.57E-05 |
| PPP4R3B  | 2p16.1       | 0.219869 | 1.45E-05 | 6.57E-05 |
| TPBG     | 6q14.1       | 0.219857 | 1.45E-05 | 6.58E-05 |
| LRRC20   | 10q22.1      | -0.21985 | 1.45E-05 | 6.58E-05 |
| SUPT7L   | 2p23.3       | -0.21985 | 1.45E-05 | 6.58E-05 |
| SF3A3    | 1p34.3       | -0.21983 | 1.45E-05 | 6.59E-05 |
| MAGEE2   | Xq13.3       | 0.219785 | 1.46E-05 | 6.62E-05 |
| TLCD1    | 17q11.2      | -0.21974 | 1.47E-05 | 6.64E-05 |
| ATL1     | 14q22.1      | 0.219736 | 1.47E-05 | 6.64E-05 |
| DUS2     | 16q22.1      | -0.21968 | 1.47E-05 | 6.67E-05 |
| ANP32A   | 15q23        | 0.219685 | 1.47E-05 | 6.67E-05 |
| ZNF626   | 19p12        | 0.219653 | 1.48E-05 | 6.69E-05 |
| TCTEX1D2 | 3q29         | -0.21965 | 1.48E-05 | 6.69E-05 |
| ITM2A    | Xq21.1       | 0.219622 | 1.48E-05 | 6.71E-05 |
| PCDHB6   | 5q31.3       | 0.219535 | 1.49E-05 | 6.76E-05 |
| LRRN2    | 1q32.1       | 0.219506 | 1.50E-05 | 6.77E-05 |
| RBM38    | 20q13.31     | -0.21949 | 1.50E-05 | 6.78E-05 |
| DUSP14   | 17q12        | -0.21948 | 1.50E-05 | 6.79E-05 |
| HERC4    | 10q21.3      | 0.219426 | 1.51E-05 | 6.82E-05 |
| MYCBP2   | 13q22.3      | 0.219408 | 1.51E-05 | 6.83E-05 |
| VPS18    | 15q15.1      | 0.219369 | 1.52E-05 | 6.85E-05 |
| CD3EAP   | 19q13.32     | -0.21934 | 1.52E-05 | 6.87E-05 |
| ZRANB1   | 10q26.13     | 0.219324 | 1.52E-05 | 6.88E-05 |
| FLRT2    | 14q31.3      | 0.219317 | 1.52E-05 | 6.88E-05 |
| GRHPR    | 9p13.2       | -0.21929 | 1.53E-05 | 6.89E-05 |
| RFPL1S   | 22q12.2      | 0.219248 | 1.53E-05 | 6.92E-05 |
| TTC9     | 14q24.2      | 0.219239 | 1.53E-05 | 6.92E-05 |
| ZNF618   | 9q32         | 0.219121 | 1.55E-05 | 7.00E-05 |
| LGALS8   | 1q43         | 0.219081 | 1.56E-05 | 7.02E-05 |
| ST20     | 15q25.1      | -0.21907 | 1.56E-05 | 7.03E-05 |
| LRRC46   | 17q21.32     | -0.21907 | 1.56E-05 | 7.03E-05 |
| DYM      | 18q21.1      | 0.219057 | 1.56E-05 | 7.03E-05 |
| MED19    | 11q12.1      | -0.21903 | 1.56E-05 | 7.05E-05 |
| FZD4     | 11q14.2      | 0.219034 | 1.56E-05 | 7.05E-05 |
| TAF13    | 1p13.3       | 0.218997 | 1.57E-05 | 7.07E-05 |
| RPL23AP7 | 2q14.1       | -0.21898 | 1.57E-05 | 7.08E-05 |
| RLN2     | 9p24.1       | -0.21898 | 1.57E-05 | 7.08E-05 |
| PTMA     | 2q37.1       | -0.21897 | 1.57E-05 | 7.08E-05 |
| CORO2B   | 15q23        | 0.218962 | 1.57E-05 | 7.08E-05 |
| UTP18    | 17q21.33     | -0.21894 | 1.58E-05 | 7.10E-05 |
| DDIT3    | 12q13.3      | -0.21884 | 1.59E-05 | 7.16E-05 |
| MC5R     | 18p11.21     | 0.218818 | 1.59E-05 | 7.17E-05 |
| SYT11    | 1q22         | 0.218792 | 1.60E-05 | 7.19E-05 |
| TMEM39B  | 1p35.2       | -0.2187  | 1.61E-05 | 7.25E-05 |
| YRDC     | 1p34.3       | -0.21867 | 1.62E-05 | 7.27E-05 |
| ZNF318   | 6p21.1       | 0.218647 | 1.62E-05 | 7.28E-05 |
| GUK1     | 1q42.13      | -0.21862 | 1.62E-05 | 7.30E-05 |
|          | 7-Mar 2q24.2 | 0.218619 | 1.62E-05 | 7.30E-05 |
| CLDN9    | 16p13.3      | -0.21859 | 1.63E-05 | 7.32E-05 |
| ADGRE4P  | 19p13.2      | 0.218494 | 1.64E-05 | 7.38E-05 |
| PPT2     | 6p21.32      | -0.2184  | 1.66E-05 | 7.44E-05 |
| BCR      | 22q11.23     | 0.218369 | 1.66E-05 | 7.46E-05 |



|              |               |          |          |          |
|--------------|---------------|----------|----------|----------|
| CDC45        | 22q11.21      | -0.21825 | 1.68E-05 | 7.54E-05 |
| DOK1         | 2p13.1        | -0.21823 | 1.68E-05 | 7.55E-05 |
| SLC9A4       | 2q12.1        | 0.218223 | 1.68E-05 | 7.55E-05 |
| UBAC1        | 9q34.3        | -0.21821 | 1.69E-05 | 7.56E-05 |
| CD79A        | 19q13.2       | 0.218198 | 1.69E-05 | 7.57E-05 |
| ALG10        | 12p11.1       | 0.21818  | 1.69E-05 | 7.58E-05 |
| L3MBTL1      | 20q13.12      | -0.21814 | 1.70E-05 | 7.60E-05 |
| AURKA        | 20q13.2       | -0.21813 | 1.70E-05 | 7.61E-05 |
| EIF2AK1      | 7p22.1        | -0.2181  | 1.70E-05 | 7.63E-05 |
| ITGAL        | 16p11.2       | 0.2181   | 1.70E-05 | 7.63E-05 |
| RAD51C       | 17q22         | -0.21806 | 1.71E-05 | 7.65E-05 |
| HSD17B7P2    | 10p11.1       | -0.21805 | 1.71E-05 | 7.66E-05 |
| USP51        | Xp11.21       | 0.218031 | 1.71E-05 | 7.67E-05 |
| CSNK2A3      | 11p15.4       | 0.218004 | 1.72E-05 | 7.69E-05 |
| PTENP1       | 9p13.3        | 0.217971 | 1.72E-05 | 7.71E-05 |
| HIBADH       | 7p15.2        | -0.21797 | 1.72E-05 | 7.71E-05 |
| LOC100133331 | 1p36.33       | -0.21796 | 1.72E-05 | 7.71E-05 |
| ESCO1        | 18q11.2       | 0.217944 | 1.73E-05 | 7.72E-05 |
| APBA3        | 19p13.3       | -0.2179  | 1.74E-05 | 7.75E-05 |
| FZD5         | 2q33.3        | 0.217865 | 1.74E-05 | 7.77E-05 |
| FAM122B      | Xq26.3        | -0.21779 | 1.75E-05 | 7.83E-05 |
| MYH11        | 16p13.11      | 0.217765 | 1.76E-05 | 7.84E-05 |
| XCR1         | 3p21.31       | 0.21776  | 1.76E-05 | 7.84E-05 |
| GK5          | 3q23          | 0.21773  | 1.76E-05 | 7.86E-05 |
| PICALM       | 11q14.2       | 0.217711 | 1.76E-05 | 7.87E-05 |
| EOMES        | 3p24.1        | 0.217673 | 1.77E-05 | 7.90E-05 |
| MFSD13A      | 10q24.32      | -0.21767 | 1.77E-05 | 7.90E-05 |
| C11ORF74     | 11p12         | -0.21767 | 1.77E-05 | 7.90E-05 |
| ZBTB11       | 3q12.3        | 0.217642 | 1.78E-05 | 7.92E-05 |
| CNOT1        | 16q21         | 0.21764  | 1.78E-05 | 7.92E-05 |
| GPR1         | 2q33.3        | 0.217635 | 1.78E-05 | 7.92E-05 |
| PLXNA4       | 7q32.3        | 0.217607 | 1.78E-05 | 7.94E-05 |
| SIRT6        | 19p13.3       | -0.21756 | 1.79E-05 | 7.97E-05 |
| PEX11G       | 19p13.2       | -0.21755 | 1.79E-05 | 7.97E-05 |
| EPB41L3      | 18p11.31      | 0.217537 | 1.79E-05 | 7.98E-05 |
| INPP5E       | 9q34.3        | -0.21753 | 1.79E-05 | 7.99E-05 |
| GAS2L3       | 12q23.1       | 0.217513 | 1.80E-05 | 8.00E-05 |
| MEF2C        | 5q14.3        | 0.217496 | 1.80E-05 | 8.01E-05 |
| DDX59        | 1q32.1        | 0.217489 | 1.80E-05 | 8.01E-05 |
| FAM49A       | 2p24.2        | 0.217463 | 1.80E-05 | 8.03E-05 |
| SOD1         | 21q22.11      | -0.21746 | 1.81E-05 | 8.03E-05 |
| GLI3         | 7p14.1        | 0.217416 | 1.81E-05 | 8.06E-05 |
| ZBTB14       | 18p11.31      | 0.217355 | 1.82E-05 | 8.10E-05 |
| ACSS3        | 12q21.31      | 0.21725  | 1.84E-05 | 8.18E-05 |
| DBI          | 2q14.2        | -0.21722 | 1.85E-05 | 8.20E-05 |
| PAX9         | 14q13.3       | 0.217157 | 1.86E-05 | 8.24E-05 |
| SLITRK5      | 13q31.2       | 0.217114 | 1.86E-05 | 8.27E-05 |
| MPZL3        | 11q23.3       | 0.217054 | 1.87E-05 | 8.32E-05 |
| RSPO1        | 1p34.3        | 0.216953 | 1.89E-05 | 8.39E-05 |
| MFSD4A       | 1q32.1        | 0.216953 | 1.89E-05 | 8.39E-05 |
| SATL1        | Xq21.1        | -0.21694 | 1.89E-05 | 8.40E-05 |
| VCAN         | 5q14.2-q14.3  | 0.216911 | 1.90E-05 | 8.42E-05 |
| WWOX         | 16q23.1-q23.2 | -0.21689 | 1.90E-05 | 8.43E-05 |
| C5ORF24      | 5q31.1        | 0.216863 | 1.91E-05 | 8.45E-05 |
| CD37         | 19q13.33      | 0.216841 | 1.91E-05 | 8.46E-05 |
| AP2B1        | 17q12         | 0.216825 | 1.91E-05 | 8.48E-05 |
| SP4          | 7p15.3        | 0.216787 | 1.92E-05 | 8.50E-05 |
| YOD1         | 1q32.1        | 0.216714 | 1.93E-05 | 8.56E-05 |

|          |                |          |          |          |
|----------|----------------|----------|----------|----------|
| PMS2     | 7p22.1         | -0.2166  | 1.95E-05 | 8.64E-05 |
| NPY1R    | 4q32.2         | 0.216604 | 1.95E-05 | 8.64E-05 |
| UGDH     | 4p14           | 0.2166   | 1.95E-05 | 8.64E-05 |
| DDX60L   | 4q32.3         | 0.216561 | 1.96E-05 | 8.67E-05 |
| SIGLEC7  | 19q13.41       | 0.216556 | 1.96E-05 | 8.67E-05 |
| WASL     | 7q31.32        | 0.216523 | 1.97E-05 | 8.70E-05 |
| PIK3R5   | 17p13.1        | 0.216504 | 1.97E-05 | 8.71E-05 |
| PROCA1   | 17q11.2        | -0.21649 | 1.97E-05 | 8.72E-05 |
| CHUK     | 10q24.31       | 0.21648  | 1.97E-05 | 8.72E-05 |
| GJC2     | 1q42.13        | 0.21638  | 1.99E-05 | 8.80E-05 |
| ETV1     | 7p21.2         | 0.216369 | 1.99E-05 | 8.81E-05 |
| NUDT22   | 11q13.1        | -0.21637 | 1.99E-05 | 8.81E-05 |
| PORCN    | Xp11.23        | -0.21635 | 2.00E-05 | 8.82E-05 |
| TMEM245  | 9q31.3         | 0.216332 | 2.00E-05 | 8.83E-05 |
| PRICKLE3 | Xp11.23        | -0.21633 | 2.00E-05 | 8.83E-05 |
| HIGD2A   | 5q35.2         | -0.21632 | 2.00E-05 | 8.83E-05 |
| COLEC12  | 18p11.32       | 0.216318 | 2.00E-05 | 8.84E-05 |
| HMG2N2   | 1p36.11        | -0.21632 | 2.00E-05 | 8.84E-05 |
| CCL15    | 17q12          | -0.21628 | 2.01E-05 | 8.86E-05 |
| TGFBR1   | 9q22.33        | 0.2162   | 2.02E-05 | 8.92E-05 |
| TNXB     | 6p21.33-p21.32 | 0.2162   | 2.02E-05 | 8.92E-05 |
| RAP1B    | 12q15          | 0.216193 | 2.02E-05 | 8.93E-05 |
| WNT9A    | 1q42.13        | 0.216185 | 2.03E-05 | 8.93E-05 |
| FZD8     | 10p11.21       | 0.216174 | 2.03E-05 | 8.94E-05 |
| TMEM70   | 8q21.11        | -0.21617 | 2.03E-05 | 8.94E-05 |
| ITGB2    | 21q22.3        | 0.216139 | 2.03E-05 | 8.96E-05 |
| ST3GAL5  | 2p11.2         | 0.216133 | 2.04E-05 | 8.97E-05 |
| SAP30BP  | 17q25.1        | -0.21612 | 2.04E-05 | 8.97E-05 |
| MITF     | 3p13           | 0.216118 | 2.04E-05 | 8.97E-05 |
| CASP8AP2 | 6q15           | 0.216094 | 2.04E-05 | 8.99E-05 |
| FAM89B   | 11q13.1        | -0.21608 | 2.05E-05 | 9.00E-05 |
| PIK3R6   | 17p13.1        | 0.216047 | 2.05E-05 | 9.03E-05 |
| TRIM22   | 11p15.4        | 0.21604  | 2.05E-05 | 9.03E-05 |
| ZBTB34   | 9q33.3         | 0.215997 | 2.06E-05 | 9.06E-05 |
| MAP1B    | 5q13.2         | 0.215973 | 2.07E-05 | 9.08E-05 |
| EPN1     | 19q13.42       | -0.21596 | 2.07E-05 | 9.09E-05 |
| MTCP1    | Xq28           | -0.21595 | 2.07E-05 | 9.09E-05 |
| KCNJ5    | 11q24.3        | 0.215943 | 2.07E-05 | 9.10E-05 |
| ZFYVE27  | 10q24.2        | -0.21594 | 2.07E-05 | 9.10E-05 |
| FYN      | 6q21           | 0.215907 | 2.08E-05 | 9.12E-05 |
| TRIAP1   | 12q24.31       | -0.21589 | 2.08E-05 | 9.13E-05 |
| ZNF146   | 19q13.12       | 0.215836 | 2.09E-05 | 9.18E-05 |
| PRSS35   | 6q14.2         | 0.21581  | 2.10E-05 | 9.20E-05 |
| CEP135   | 4q12           | 0.215771 | 2.10E-05 | 9.23E-05 |
| C12ORF45 | 12q23.3        | -0.21574 | 2.11E-05 | 9.25E-05 |
| IBA57    | 1q42.13        | 0.215739 | 2.11E-05 | 9.25E-05 |
| FCRL5    | 1q23.1         | 0.215736 | 2.11E-05 | 9.25E-05 |
| TFPT     | 19q13.42       | -0.21569 | 2.12E-05 | 9.29E-05 |
| ZDHHC15  | Xq13.3         | 0.21568  | 2.12E-05 | 9.29E-05 |
| PREX1    | 20q13.13       | 0.215677 | 2.12E-05 | 9.30E-05 |
| SCAMP1   | 5q14.1         | 0.215674 | 2.12E-05 | 9.30E-05 |
| BIRC7    | 20q13.33       | -0.21566 | 2.12E-05 | 9.30E-05 |
| B4GALNT3 | 12p13.33       | 0.215657 | 2.13E-05 | 9.31E-05 |
| TSPAN14  | 10q23.1        | 0.215634 | 2.13E-05 | 9.32E-05 |
| CARD11   | 7p22.2         | 0.215583 | 2.14E-05 | 9.36E-05 |
| CTDSPL   | 3p22.2         | 0.215543 | 2.15E-05 | 9.40E-05 |
| SUCLG2   | 3p14.1         | 0.215518 | 2.15E-05 | 9.42E-05 |
| WDR97    | 8q24.3         | -0.2155  | 2.16E-05 | 9.43E-05 |

|          |              |          |          |          |
|----------|--------------|----------|----------|----------|
| TXNDC16  | 14q22.1      | 0.215444 | 2.17E-05 | 9.47E-05 |
| KRI1     | 19p13.2      | -0.21543 | 2.17E-05 | 9.49E-05 |
| GNAL     | 18p11.2.1    | 0.215387 | 2.18E-05 | 9.52E-05 |
| SLC27A2  | 15q21.2      | 0.215317 | 2.19E-05 | 9.58E-05 |
| USP46    | 4q12         | 0.215292 | 2.20E-05 | 9.60E-05 |
| CHIC1    | Xq13.2       | 0.21529  | 2.20E-05 | 9.60E-05 |
| SPHKAP   | 2q36.3       | 0.215288 | 2.20E-05 | 9.60E-05 |
| NDST2    | 10q22.2      | 0.215274 | 2.20E-05 | 9.60E-05 |
| ERCC1    | 19q13.32     | -0.21527 | 2.20E-05 | 9.60E-05 |
| SLBP     | 4p16.3       | -0.21527 | 2.20E-05 | 9.61E-05 |
| TXK      | 4p12         | 0.215264 | 2.20E-05 | 9.61E-05 |
| UHRF1BP1 | 6p21.31      | 0.215205 | 2.21E-05 | 9.66E-05 |
| BTBD16   | 10q26.13     | -0.2152  | 2.22E-05 | 9.66E-05 |
| PCDHA3   | 5q31.3       | 0.215099 | 2.23E-05 | 9.74E-05 |
| TBCEL    | 11q23.3      | 0.215088 | 2.24E-05 | 9.75E-05 |
| PLA2G12B | 10q22.1      | -0.21508 | 2.24E-05 | 9.76E-05 |
| MRPS18A  | 6p21.1       | -0.21504 | 2.25E-05 | 9.79E-05 |
| EEFSEC   | 3q21.3       | -0.21504 | 2.25E-05 | 9.79E-05 |
| TSTD2    | 9q22.33      | 0.21503  | 2.25E-05 | 9.80E-05 |
| MNDA     | 1q23.1       | 0.215026 | 2.25E-05 | 9.80E-05 |
| ZNF202   | 11q24.1      | -0.21501 | 2.25E-05 | 9.81E-05 |
| PPP1R8   | 1p35.3       | -0.21493 | 2.27E-05 | 9.87E-05 |
| SSRP1    | 11q12.1      | -0.2149  | 2.28E-05 | 9.90E-05 |
| JAKMIP3  | 10q26.3      | 0.214885 | 2.28E-05 | 9.91E-05 |
| CNBD2    | 20q11.23     | -0.21488 | 2.28E-05 | 9.92E-05 |
| RAPGEF1  | 9q34.13      | 0.214871 | 2.28E-05 | 9.92E-05 |
| RAB20    | 13q34        | -0.21487 | 2.28E-05 | 9.92E-05 |
| CLDN3    | 7q11.23      | -0.21485 | 2.29E-05 | 9.94E-05 |
| HDLBP    | 2q37.3       | 0.214834 | 2.29E-05 | 9.95E-05 |
| UNC13D   | 17q25.1      | 0.214804 | 2.29E-05 | 9.97E-05 |
| CAPN7    | 3p25.1       | 0.214803 | 2.30E-05 | 9.97E-05 |
| JMY      | 5q14.1       | 0.214767 | 2.30E-05 | 0.0001   |
| GPR176   | 15q14-q15.1  | 0.214741 | 2.31E-05 | 0.0001   |
| PBXIP1   | 1q21.3       | 0.214723 | 2.31E-05 | 0.0001   |
| ECHDC2   | 1p32.3       | -0.21472 | 2.31E-05 | 0.0001   |
| ZNF394   | 7q22.1       | -0.21471 | 2.31E-05 | 0.0001   |
| GOLM1    | 9q21.33      | 0.214695 | 2.32E-05 | 0.000101 |
| RTTN     | 18q22.2      | 0.214665 | 2.32E-05 | 0.000101 |
| DTWD1    | 15q21.2      | 0.214636 | 2.33E-05 | 0.000101 |
| PEPD     | 19q13.11     | -0.21462 | 2.33E-05 | 0.000101 |
| ADGRE2   | 19p13.12     | 0.214615 | 2.33E-05 | 0.000101 |
| GNB4     | 3q26.33      | 0.214608 | 2.34E-05 | 0.000101 |
| SNHG4    | 5q31.2       | -0.21458 | 2.34E-05 | 0.000101 |
| ACTR3    | 2q14.1       | 0.214561 | 2.35E-05 | 0.000102 |
| PSAT1    | 9q21.2       | -0.21456 | 2.35E-05 | 0.000102 |
| CACUL1   | 10q26.11     | 0.214538 | 2.35E-05 | 0.000102 |
| ZNF396   | 18q12.2      | 0.214522 | 2.35E-05 | 0.000102 |
| DISC1    | 1q42.2       | 0.214507 | 2.36E-05 | 0.000102 |
| ZNF496   | 1q44         | 0.214456 | 2.37E-05 | 0.000102 |
| HLA-DOA  | 6p21.32      | 0.214452 | 2.37E-05 | 0.000102 |
| APH1B    | 15q22.2      | 0.214401 | 2.38E-05 | 0.000103 |
| MATN2    | 8q22.1-q22.2 | 0.214369 | 2.39E-05 | 0.000103 |
| LRRC15   | 3q29         | 0.214322 | 2.40E-05 | 0.000104 |
| GIMAP6   | 7q36.1       | 0.214317 | 2.40E-05 | 0.000104 |
| MRPL15   | 8q11.23      | -0.21432 | 2.40E-05 | 0.000104 |
| MTNR1A   | 4q35.2       | 0.214256 | 2.41E-05 | 0.000104 |
| SPIN1    | 9q22.1       | 0.214214 | 2.42E-05 | 0.000105 |
| FAM223B  | Xq28         | -0.21419 | 2.43E-05 | 0.000105 |

|          |          |          |          |          |
|----------|----------|----------|----------|----------|
| ING1     | 13q34    | -0.21418 | 2.43E-05 | 0.000105 |
| HEXD     | 17q25.3  | -0.21416 | 2.43E-05 | 0.000105 |
| USP33    | 1p31.1   | 0.214161 | 2.43E-05 | 0.000105 |
| ZFP69    | 1p34.2   | -0.21413 | 2.44E-05 | 0.000105 |
| DCTN3    | 9p13.3   | -0.2141  | 2.44E-05 | 0.000105 |
| USP35    | 11q14.1  | -0.21408 | 2.45E-05 | 0.000106 |
| RCC1     | 1p35.3   | -0.21408 | 2.45E-05 | 0.000106 |
| NUGGC    | 8p21.1   | 0.214019 | 2.46E-05 | 0.000106 |
| MRPS22   | 3q23     | -0.21395 | 2.48E-05 | 0.000107 |
| POU2F2   | 19q13.2  | 0.213918 | 2.48E-05 | 0.000107 |
| HFE      | 6p22.2   | 0.213899 | 2.49E-05 | 0.000107 |
| FCER1A   | 1q23.2   | 0.213884 | 2.49E-05 | 0.000107 |
| CNKS1R   | 1p36.11  | -0.21388 | 2.49E-05 | 0.000107 |
| SFT2D1   | 6q27     | -0.21388 | 2.49E-05 | 0.000107 |
| MYL12A   | 18p11.31 | 0.213859 | 2.50E-05 | 0.000108 |
| RPL19P12 | 7q22.1   | -0.21377 | 2.52E-05 | 0.000108 |
| NAPG     | 18p11.22 | 0.213772 | 2.52E-05 | 0.000108 |
| GPX8     | 5q11.2   | 0.213749 | 2.52E-05 | 0.000109 |
| SPCS1    | 3p21.1   | -0.21374 | 2.53E-05 | 0.000109 |
| MAMSTR   | 19q13.33 | -0.21363 | 2.55E-05 | 0.00011  |
| IZUMO4   | 19p13.3  | -0.21363 | 2.55E-05 | 0.00011  |
| RAB11B   | 19p13.2  | -0.21362 | 2.55E-05 | 0.00011  |
| AOC3     | 17q21.31 | 0.213616 | 2.55E-05 | 0.00011  |
| TTC28    | 22q12.1  | 0.213594 | 2.56E-05 | 0.00011  |
| TNS1     | 2q35     | 0.213523 | 2.57E-05 | 0.000111 |
| VAMP2    | 17p13.1  | 0.213505 | 2.58E-05 | 0.000111 |
| PCIF1    | 20q13.12 | -0.21349 | 2.58E-05 | 0.000111 |
| HIST1H4E | 6p22.2   | -0.21344 | 2.59E-05 | 0.000111 |
| PML      | 15q24.1  | 0.213394 | 2.60E-05 | 0.000112 |
| EZR      | 6q25.3   | 0.213363 | 2.61E-05 | 0.000112 |
| SLC27A6  | 5q23.3   | 0.213359 | 2.61E-05 | 0.000112 |
| SVEP1    | 9q31.3   | 0.213339 | 2.62E-05 | 0.000112 |
| GNPTG    | 16p13.3  | -0.21334 | 2.62E-05 | 0.000112 |
| ERP29    | 12q24.13 | -0.21329 | 2.63E-05 | 0.000113 |
| CA2      | 8q21.2   | 0.213282 | 2.63E-05 | 0.000113 |
| LACTB2   | 8q13.3   | -0.21326 | 2.63E-05 | 0.000113 |
| EYA2     | 20q13.12 | 0.213256 | 2.64E-05 | 0.000113 |
| BTBD3    | 20p12.2  | 0.213212 | 2.65E-05 | 0.000113 |
| LIX1L    | 1q21.1   | 0.213169 | 2.66E-05 | 0.000114 |
| PRKAR2B  | 7q22.3   | 0.21314  | 2.66E-05 | 0.000114 |
| GORAB    | 1q24.2   | 0.21313  | 2.67E-05 | 0.000114 |
| NPY2R    | 4q32.1   | 0.213108 | 2.67E-05 | 0.000114 |
| TOP3B    | 22q11.22 | -0.21311 | 2.67E-05 | 0.000114 |
| LILRB1   | 19q13.42 | 0.213094 | 2.67E-05 | 0.000114 |
| ZNF579   | 19q13.42 | -0.21307 | 2.68E-05 | 0.000115 |
| ZNF836   | 19q13.41 | 0.213055 | 2.68E-05 | 0.000115 |
| CAMKV    | 3p21.31  | -0.21301 | 2.69E-05 | 0.000115 |
| EPM2A    | 6q24.3   | 0.212977 | 2.70E-05 | 0.000116 |
| ZNF337   | 20p11.21 | -0.21297 | 2.70E-05 | 0.000116 |
| PCDHGA12 | 5q31.3   | 0.212956 | 2.71E-05 | 0.000116 |
| IPO5     | 13q32.2  | -0.21295 | 2.71E-05 | 0.000116 |
| HSDL2    | 9q32     | -0.21295 | 2.71E-05 | 0.000116 |
| AGAP1    | 2q37.2   | 0.212934 | 2.71E-05 | 0.000116 |
| CHM      | Xq21.2   | 0.212924 | 2.72E-05 | 0.000116 |
| ILF3-DT  | 19p13.2  | -0.21292 | 2.72E-05 | 0.000116 |
| NKAPP1   | Xq24     | -0.2129  | 2.72E-05 | 0.000116 |
| NUP93    | 16q13    | -0.2129  | 2.72E-05 | 0.000116 |
| SNORA71E | 20q11.23 | -0.21287 | 2.73E-05 | 0.000116 |

|           |          |          |          |          |
|-----------|----------|----------|----------|----------|
| ANP32E    | 1q21.2   | 0.212851 | 2.73E-05 | 0.000117 |
| LPAR1     | 9q31.3   | 0.212842 | 2.73E-05 | 0.000117 |
| KY        | 3q22.2   | 0.212812 | 2.74E-05 | 0.000117 |
| CCDC115   | 2q21.1   | -0.21281 | 2.74E-05 | 0.000117 |
| HTR7      | 10q23.31 | 0.212801 | 2.75E-05 | 0.000117 |
| GINM1     | 6q25.1   | 0.212798 | 2.75E-05 | 0.000117 |
| PHLDB2    | 3q13.2   | 0.212779 | 2.75E-05 | 0.000117 |
| ADORA3    | 1p13.2   | 0.212764 | 2.75E-05 | 0.000117 |
| RPL15     | 3p24.2   | -0.21273 | 2.76E-05 | 0.000118 |
| IL1RL1    | 2q12.1   | 0.212729 | 2.76E-05 | 0.000118 |
| MAGI2     | 7q21.11  | 0.212683 | 2.77E-05 | 0.000118 |
| ZSCAN12P1 | 6p22.1   | 0.212655 | 2.78E-05 | 0.000118 |
| GBAP1     | 1q22     | -0.21264 | 2.78E-05 | 0.000118 |
| CD44      | 11p13    | 0.212636 | 2.79E-05 | 0.000118 |
| ZNF282    | 7q36.1   | -0.21263 | 2.79E-05 | 0.000119 |
| L3MBTL3   | 6q23.1   | 0.212623 | 2.79E-05 | 0.000119 |
| PDIA3P1   | 1q21.1   | 0.212609 | 2.79E-05 | 0.000119 |
| PUS7      | 7q22.3   | -0.2126  | 2.79E-05 | 0.000119 |
| TLL2      | 10q24.1  | 0.212529 | 2.81E-05 | 0.000119 |
| MMP28     | 17q12    | 0.212526 | 2.81E-05 | 0.000119 |
| AREG      | 4q13.3   | -0.21252 | 2.81E-05 | 0.000119 |
| PIGK      | 1p31.1   | 0.212497 | 2.82E-05 | 0.00012  |
| PSMD8     | 19q13.2  | -0.21244 | 2.84E-05 | 0.00012  |
| ARPC4     | 3p25.3   | -0.21241 | 2.84E-05 | 0.000121 |
| AGBL1     | 15q25.3  | 0.212405 | 2.84E-05 | 0.000121 |
| LARGE2    | 11p11.2  | -0.2124  | 2.84E-05 | 0.000121 |
| RLN1      | 9p24.1   | -0.21237 | 2.85E-05 | 0.000121 |
| CLIC1     | 6p21.33  | -0.21233 | 2.86E-05 | 0.000121 |
| EIF1AD    | 11q13.1  | -0.21231 | 2.87E-05 | 0.000122 |
| TNFRSF17  | 16p13.13 | 0.212288 | 2.87E-05 | 0.000122 |
| CTAGE11P  | 13q22.2  | 0.212272 | 2.88E-05 | 0.000122 |
| ABCC6P2   | 16p13.11 | -0.21226 | 2.88E-05 | 0.000122 |
| SIGIRR    | 11p15.5  | -0.21226 | 2.88E-05 | 0.000122 |
| WDR90     | 16p13.3  | -0.21222 | 2.89E-05 | 0.000122 |
| CD2BP2    | 16p11.2  | -0.21219 | 2.90E-05 | 0.000123 |
| MYO1B     | 2q32.3   | 0.212174 | 2.90E-05 | 0.000123 |
| TMEM99    | 17q21.2  | -0.21217 | 2.90E-05 | 0.000123 |
| CPED1     | 7q31.31  | 0.212097 | 2.92E-05 | 0.000124 |
| PHF2      | 9q22.31  | 0.212034 | 2.94E-05 | 0.000124 |
| PNMA2     | 8p21.2   | 0.212002 | 2.95E-05 | 0.000125 |
| ABCC2     | 10q24.2  | -0.212   | 2.95E-05 | 0.000125 |
| CFAP97    | 4q35.1   | 0.211969 | 2.96E-05 | 0.000125 |
| ARHGAP29  | 1p22.1   | 0.211952 | 2.96E-05 | 0.000125 |
| PLD4      | 14q32.33 | 0.211892 | 2.98E-05 | 0.000126 |
| NIF3L1    | 2q33.1   | -0.21188 | 2.98E-05 | 0.000126 |
| GNG4      | 1q42.3   | -0.21183 | 2.99E-05 | 0.000126 |
| BORA      | 13q21.33 | -0.21182 | 2.99E-05 | 0.000126 |
| ADAP1     | 7p22.3   | -0.21181 | 3.00E-05 | 0.000127 |
| RFTN1     | 3p24.3   | 0.211791 | 3.00E-05 | 0.000127 |
| ZYG11B    | 1p32.3   | 0.211781 | 3.01E-05 | 0.000127 |
| DIP2A     | 21q22.3  | 0.211761 | 3.01E-05 | 0.000127 |
| VAV2      | 9q34.2   | -0.21174 | 3.02E-05 | 0.000127 |
| CEP170P1  | 4q26     | 0.211733 | 3.02E-05 | 0.000127 |
| CCNJL     | 5q33.3   | 0.211725 | 3.02E-05 | 0.000127 |
| GCLM      | 1p22.1   | 0.21172  | 3.02E-05 | 0.000127 |
| ENPP2     | 8q24.12  | 0.211718 | 3.02E-05 | 0.000127 |
| IFRD1     | 7q31.1   | -0.21164 | 3.04E-05 | 0.000128 |
| ICE1      | 5p15.32  | 0.211624 | 3.05E-05 | 0.000128 |

|           |              |          |          |          |
|-----------|--------------|----------|----------|----------|
| TPSAB1    | 16p13.3      | 0.211589 | 3.06E-05 | 0.000129 |
| EPB41L4A  | 5q22.1-q22.2 | 0.211568 | 3.06E-05 | 0.000129 |
| UBE2F     | 2q37.3       | -0.21153 | 3.07E-05 | 0.000129 |
| KANK2     | 19p13.2      | 0.211513 | 3.08E-05 | 0.00013  |
| KIF2C     | 1p34.1       | -0.21147 | 3.09E-05 | 0.00013  |
| COPB1     | 11p15.2      | 0.211408 | 3.11E-05 | 0.000131 |
| FCRL2     | 1q23.1       | 0.211373 | 3.12E-05 | 0.000131 |
| HTR3E     | 3q27.1       | 0.21136  | 3.12E-05 | 0.000131 |
| EXOC3-AS1 | 5p15.33      | -0.21134 | 3.12E-05 | 0.000131 |
| BGLAP     | 1q22         | -0.21133 | 3.13E-05 | 0.000132 |
| PLCH1     | 3q25.31      | 0.211309 | 3.13E-05 | 0.000132 |
| ATG4D     | 19p13.2      | -0.21129 | 3.14E-05 | 0.000132 |
| TMEM163   | 2q21.3       | 0.21127  | 3.14E-05 | 0.000132 |
| ADAM23    | 2q33.3       | 0.211269 | 3.14E-05 | 0.000132 |
| IRF2BP1   | 19q13.32     | -0.21125 | 3.15E-05 | 0.000132 |
| NME4      | 16p13.3      | -0.21122 | 3.16E-05 | 0.000133 |
| PPP2R5C   | 14q32.31     | 0.211215 | 3.16E-05 | 0.000133 |
|           | 6-Mar 5p15.2 | 0.211206 | 3.16E-05 | 0.000133 |
| PRSS30P   | 16p13.3      | -0.21115 | 3.18E-05 | 0.000133 |
| CHKA      | 11q13.2      | -0.21115 | 3.18E-05 | 0.000133 |
| TMEM80    | 11p15.5      | -0.21113 | 3.18E-05 | 0.000133 |
| MANEA     | 6q16.1       | 0.211131 | 3.18E-05 | 0.000133 |
| SCN7A     | 2q24.3       | 0.21113  | 3.18E-05 | 0.000133 |
| CYP1B1    | 2p22.2       | 0.211111 | 3.19E-05 | 0.000134 |
| SPINT1    | 15q15.1      | 0.21111  | 3.19E-05 | 0.000134 |
| RASSF8    | 12p12.1      | 0.211107 | 3.19E-05 | 0.000134 |
| BNIP1     | 5q35.1       | -0.21108 | 3.20E-05 | 0.000134 |
| MMP14     | 14q11.2      | 0.211078 | 3.20E-05 | 0.000134 |
| FSCN1     | 7p22.1       | 0.211057 | 3.20E-05 | 0.000134 |
| IL6R      | 1q21.3       | 0.211016 | 3.22E-05 | 0.000135 |
| UBASH3B   | 11q24.1      | 0.210991 | 3.22E-05 | 0.000135 |
| PRMT3     | 11p15.1      | -0.21093 | 3.24E-05 | 0.000136 |
| C2CD3     | 11q13.4      | 0.210927 | 3.24E-05 | 0.000136 |
| SYT4      | 18q12.3      | 0.210924 | 3.24E-05 | 0.000136 |
| CCNYL1    | 2q33.3       | 0.210904 | 3.25E-05 | 0.000136 |
| GASK1B    | 4q32.1       | 0.210904 | 3.25E-05 | 0.000136 |
| NEFH      | 22q12.2      | 0.210879 | 3.25E-05 | 0.000136 |
| MRPL45    | 17q12        | -0.21086 | 3.26E-05 | 0.000136 |
| PHF11     | 13q14.2      | -0.21085 | 3.26E-05 | 0.000136 |
| GOLGA7B   | 10q24.2      | -0.21085 | 3.26E-05 | 0.000136 |
| LINC00341 | 14q32.13     | 0.210843 | 3.26E-05 | 0.000136 |
| CSRP1     | 1q32.1       | 0.21082  | 3.27E-05 | 0.000137 |
| AKAP8L    | 19p13.12     | -0.21081 | 3.27E-05 | 0.000137 |
| BANK1     | 4q24         | 0.210787 | 3.28E-05 | 0.000137 |
| ZNF598    | 16p13.3      | -0.21077 | 3.29E-05 | 0.000137 |
| CD163     | 12p13.31     | 0.210749 | 3.29E-05 | 0.000137 |
| LY6G6E    | 6p21.33      | -0.21068 | 3.31E-05 | 0.000138 |
| SPTLC3    | 20p12.1      | 0.210646 | 3.32E-05 | 0.000139 |
| TMEM184B  | 22q13.1      | 0.210646 | 3.32E-05 | 0.000139 |
| OSBPL10   | 3p23         | 0.210609 | 3.33E-05 | 0.000139 |
| CTSA      | 20q13.12     | -0.21058 | 3.34E-05 | 0.000139 |
| TBCC      | 6p21.1       | -0.21058 | 3.34E-05 | 0.000139 |
| NAT10     | 11p13        | -0.21057 | 3.35E-05 | 0.000139 |
| TERT      | 5p15.33      | -0.21056 | 3.35E-05 | 0.000139 |
| TMEM156   | 4p14         | 0.210534 | 3.35E-05 | 0.00014  |
| RPL9      | 4p14         | -0.21052 | 3.36E-05 | 0.00014  |
| RPS6KA4   | 11q13.1      | -0.21051 | 3.36E-05 | 0.00014  |
| QDPR      | 4p15.32      | -0.21048 | 3.37E-05 | 0.00014  |

|            |              |          |          |          |
|------------|--------------|----------|----------|----------|
| SARAF      | 8p12         | 0.210468 | 3.37E-05 | 0.00014  |
| MTIF3      | 13q12.2      | -0.21044 | 3.38E-05 | 0.000141 |
| PLEKHA5    | 12p12.3      | 0.210423 | 3.39E-05 | 0.000141 |
| ZNF32      | 10q11.21     | -0.2104  | 3.39E-05 | 0.000141 |
| DGKH       | 13q14.11     | 0.210366 | 3.40E-05 | 0.000142 |
| ZNF792     | 19q13.11     | 0.210364 | 3.41E-05 | 0.000142 |
| WBP4       | 13q14.11     | -0.21035 | 3.41E-05 | 0.000142 |
| PPP1R12C   | 19q13.42     | -0.21033 | 3.42E-05 | 0.000142 |
| TFB1M      | 6q25.3       | -0.2103  | 3.43E-05 | 0.000142 |
| RNF7       | 3q23         | -0.21029 | 3.43E-05 | 0.000142 |
| CARHSP1    | 16p13.2      | -0.21029 | 3.43E-05 | 0.000142 |
| NTPCR      | 1q42.2       | -0.21029 | 3.43E-05 | 0.000142 |
| PATJ       | 1p31.3       | 0.210247 | 3.44E-05 | 0.000143 |
| NAA38      | 17p13.1      | -0.21024 | 3.44E-05 | 0.000143 |
| CHMP1B     | 18p11.21     | 0.21019  | 3.46E-05 | 0.000143 |
| GCAT       | 22q13.1      | -0.21017 | 3.46E-05 | 0.000144 |
| SEPTIN10   | 2q13         | 0.210163 | 3.47E-05 | 0.000144 |
| SKIV2L     | 6p21.33      | -0.21016 | 3.47E-05 | 0.000144 |
| RNF5       | 6p21.32      | -0.21011 | 3.48E-05 | 0.000144 |
| IDI2       | 10p15.3      | -0.21007 | 3.49E-05 | 0.000145 |
| UBE2Q2P1   | 15q25.2      | 0.209977 | 3.52E-05 | 0.000146 |
| CDPF1      | 22q13.31     | -0.20993 | 3.54E-05 | 0.000147 |
| DRG2       | 17p11.2      | -0.20993 | 3.54E-05 | 0.000147 |
| AGAP7P     | 10q11.22     | -0.20992 | 3.54E-05 | 0.000147 |
| S1PR1      | 1p21.2       | 0.209903 | 3.55E-05 | 0.000147 |
| SUMO1P3    | 1q23.2       | -0.20988 | 3.55E-05 | 0.000147 |
| SENP8      | 15q23        | 0.209858 | 3.56E-05 | 0.000147 |
| ANO6       | 12q12        | 0.209833 | 3.57E-05 | 0.000148 |
| PLEKHG3    | 14q23.3      | 0.209807 | 3.58E-05 | 0.000148 |
| DCAF15     | 19p13.12     | -0.20978 | 3.58E-05 | 0.000148 |
| CCT5       | 5p15.2       | -0.20976 | 3.59E-05 | 0.000148 |
| NEK9       | 14q24.3      | 0.209684 | 3.61E-05 | 0.000149 |
| CCR8       | 3p22.1       | 0.209671 | 3.62E-05 | 0.00015  |
| C2ORF76    | 2q14.2       | -0.20965 | 3.63E-05 | 0.00015  |
| USP12      | 13q12.13     | 0.209632 | 3.63E-05 | 0.00015  |
| AMELX      | Xp22.2       | -0.20961 | 3.64E-05 | 0.00015  |
| SP8        | 7p21.1       | 0.209543 | 3.66E-05 | 0.000151 |
| RDH13      | 19q13.42     | -0.20952 | 3.67E-05 | 0.000151 |
| NTN4       | 12q22        | 0.209468 | 3.68E-05 | 0.000152 |
| BET1       | 7q21.3       | -0.20946 | 3.69E-05 | 0.000152 |
| CALU       | 7q32.1       | 0.20944  | 3.69E-05 | 0.000152 |
| BTBD2      | 19p13.3      | -0.20943 | 3.70E-05 | 0.000153 |
| NAP1L3     | Xq21.32      | 0.209402 | 3.71E-05 | 0.000153 |
| LUZP2      | 11p14.3      | 0.209363 | 3.72E-05 | 0.000153 |
| ARHGAP45   | 19p13.3      | -0.20935 | 3.72E-05 | 0.000153 |
| TSEN2      | 3p25.2       | -0.20935 | 3.72E-05 | 0.000153 |
| ST6GALNAC6 | 9q34.11      | 0.209353 | 3.72E-05 | 0.000153 |
|            | 3-Mar 5q23.2 | 0.209289 | 3.74E-05 | 0.000154 |
| PDE1C      | 7p14.3       | 0.209228 | 3.76E-05 | 0.000155 |
| EFEMP1     | 2p16.1       | 0.209174 | 3.78E-05 | 0.000156 |
| PSTK       | 10q26.13     | -0.20915 | 3.79E-05 | 0.000156 |
| ENOPH1     | 4q21.22      | -0.20913 | 3.79E-05 | 0.000156 |
| MMP20      | 11q22.2      | -0.20911 | 3.80E-05 | 0.000157 |
| ERG        | 21q22.2      | 0.209105 | 3.80E-05 | 0.000157 |
| AMOTL1     | 11q21        | 0.209068 | 3.81E-05 | 0.000157 |
| GLI2       | 2q14.2       | 0.209047 | 3.82E-05 | 0.000157 |
| KLHL2      | 4q32.3       | 0.209041 | 3.82E-05 | 0.000157 |
| ALOX15B    | 17p13.1      | 0.209013 | 3.83E-05 | 0.000158 |

|            |          |          |          |          |
|------------|----------|----------|----------|----------|
| WSB2       | 12q24.23 | 0.208997 | 3.84E-05 | 0.000158 |
| GCNT3      | 15q22.2  | 0.208939 | 3.86E-05 | 0.000159 |
| STRADB     | 2q33.1   | -0.20893 | 3.86E-05 | 0.000159 |
| SNORD22    | 11q12.3  | -0.20893 | 3.86E-05 | 0.000159 |
| PIR        | Xp22.2   | -0.20891 | 3.87E-05 | 0.000159 |
| MYO10      | 5p15.1   | 0.208867 | 3.88E-05 | 0.000159 |
| DCANP1     | 5q31.1   | 0.20884  | 3.89E-05 | 0.00016  |
| MTOR       | 1p36.22  | 0.208833 | 3.89E-05 | 0.00016  |
| GHRLOS     | 3p25.3   | -0.20883 | 3.90E-05 | 0.00016  |
| GOLGA6L6   | 15q11.2  | -0.20871 | 3.94E-05 | 0.000162 |
| ZDHHC4     | 7p22.1   | -0.2087  | 3.94E-05 | 0.000162 |
| SCARNA7    | 3q25.33  | -0.20868 | 3.95E-05 | 0.000162 |
| ALDH1A3    | 15q26.3  | 0.208672 | 3.95E-05 | 0.000162 |
| RPL31P11   | 1q23.3   | -0.20867 | 3.95E-05 | 0.000162 |
| FCRLA      | 1q23.3   | 0.208655 | 3.96E-05 | 0.000162 |
| GAS6       | 13q34    | -0.20859 | 3.98E-05 | 0.000163 |
| BAZ1B      | 7q11.23  | 0.208582 | 3.98E-05 | 0.000163 |
| TXN2       | 22q12.3  | -0.20857 | 3.98E-05 | 0.000163 |
| RNF38      | 9p13.2   | 0.208567 | 3.99E-05 | 0.000163 |
| MID2       | Xq22.3   | 0.208535 | 4.00E-05 | 0.000164 |
| RHOJ       | 14q23.2  | 0.208519 | 4.00E-05 | 0.000164 |
| LY86       | 6p25.1   | 0.208466 | 4.02E-05 | 0.000165 |
| GAPVD1     | 9q33.3   | 0.208457 | 4.02E-05 | 0.000165 |
| EFHC1      | 6p12.2   | -0.20845 | 4.03E-05 | 0.000165 |
| BICDL2     | 16p13.3  | -0.20844 | 4.03E-05 | 0.000165 |
| TYW3       | 1p31.1   | 0.208416 | 4.04E-05 | 0.000165 |
| RAP1A      | 1p13.2   | 0.208361 | 4.06E-05 | 0.000166 |
| YTHDF1     | 20q13.33 | -0.20835 | 4.06E-05 | 0.000166 |
| TSPAN1     | 1p34.1   | 0.208328 | 4.07E-05 | 0.000166 |
| IL1R2      | 2q11.2   | 0.208319 | 4.07E-05 | 0.000166 |
| GHDC       | 17q21.2  | -0.20829 | 4.08E-05 | 0.000167 |
| PSMB9      | 6p21.32  | -0.20829 | 4.08E-05 | 0.000167 |
| B3GNT5     | 3q27.1   | 0.208269 | 4.09E-05 | 0.000167 |
| DNM1P46    | 15q26.3  | 0.208225 | 4.11E-05 | 0.000168 |
| PHKA2      | Xp22.13  | -0.20822 | 4.11E-05 | 0.000168 |
| SMURF1     | 7q22.1   | 0.208208 | 4.11E-05 | 0.000168 |
| LPIN1      | 2p25.1   | 0.208194 | 4.12E-05 | 0.000168 |
| ITSN1      | 21q22.11 | 0.208168 | 4.13E-05 | 0.000168 |
| LRRC36     | 16q22.1  | -0.20816 | 4.13E-05 | 0.000169 |
| POLR1E     | 9p13.2   | -0.20816 | 4.13E-05 | 0.000169 |
| ITGB4      | 17q25.1  | 0.208153 | 4.13E-05 | 0.000169 |
| SAMSN1     | 21q11.2  | 0.208141 | 4.14E-05 | 0.000169 |
| HS3ST3A1   | 17p12    | 0.208119 | 4.14E-05 | 0.000169 |
| SYDE2      | 1p22.3   | 0.208062 | 4.16E-05 | 0.00017  |
| KCNQ5      | 6q13     | 0.20806  | 4.17E-05 | 0.00017  |
| CHKB-CPT1B | 22q13.33 | -0.20805 | 4.17E-05 | 0.00017  |
| RIPOR2     | 6p22.3   | 0.208044 | 4.17E-05 | 0.00017  |
| MAP11      | 7q22.1   | -0.20797 | 4.20E-05 | 0.000171 |
| NICN1      | 3p21.31  | -0.20797 | 4.20E-05 | 0.000171 |
| THAP11     | 16q22.1  | -0.20795 | 4.20E-05 | 0.000171 |
| GOLGA2     | 9q34.11  | 0.207933 | 4.21E-05 | 0.000171 |
| KCTD11     | 17p13.1  | 0.207912 | 4.22E-05 | 0.000172 |
| FHL1       | Xq26.3   | 0.207903 | 4.22E-05 | 0.000172 |
| C4ORF19    | 4p14     | 0.207901 | 4.22E-05 | 0.000172 |
| IRF2       | 4q35.1   | 0.207877 | 4.23E-05 | 0.000172 |
| PLCXD3     | 5p13.1   | 0.207875 | 4.23E-05 | 0.000172 |
| PCSK4      | 19p13.3  | -0.20786 | 4.24E-05 | 0.000172 |
| ACVRL1     | 12q13.13 | 0.207837 | 4.25E-05 | 0.000173 |



|             |               |          |          |          |
|-------------|---------------|----------|----------|----------|
| DTD1        | 20p11.23      | -0.20784 | 4.25E-05 | 0.000173 |
| MPHOSPH9    | 12q24.31      | 0.207819 | 4.25E-05 | 0.000173 |
| ATP5PO      | 21q22.11      | -0.20781 | 4.26E-05 | 0.000173 |
| CASS4       | 20q13.31      | 0.207795 | 4.26E-05 | 0.000173 |
| NSMCE4A     | 10q26.13      | -0.20772 | 4.29E-05 | 0.000174 |
| SCGB2A1     | 11q12.3       | 0.20771  | 4.29E-05 | 0.000174 |
| PABPC4L     | 4q28.3        | 0.207705 | 4.30E-05 | 0.000174 |
| TXNL4B      | 16q22.2       | -0.20767 | 4.31E-05 | 0.000175 |
| AFDN        | 6q27          | 0.207647 | 4.32E-05 | 0.000175 |
| FABP5       | 8q21.13       | -0.20761 | 4.33E-05 | 0.000176 |
| CLIP4       | 2p23.2        | 0.207518 | 4.37E-05 | 0.000177 |
| NFE2L2      | 2q31.2        | 0.207507 | 4.37E-05 | 0.000177 |
| RBM4        | 11q13.2       | -0.2075  | 4.37E-05 | 0.000177 |
| TRIM23      | 5q12.3        | 0.207493 | 4.38E-05 | 0.000177 |
| TMEM69      | 1p34.1        | -0.20749 | 4.38E-05 | 0.000177 |
| PAC SIN3    | 11p11.2       | -0.20746 | 4.39E-05 | 0.000178 |
| QKI         | 6q26          | 0.207441 | 4.40E-05 | 0.000178 |
| ADAMTSL1    | 9p22.2-p22.1  | 0.207419 | 4.40E-05 | 0.000178 |
| STK39       | 2q24.3        | 0.207412 | 4.41E-05 | 0.000178 |
| PPID        | 4q32.1        | -0.20741 | 4.41E-05 | 0.000178 |
| MN1         | 22q12.1       | 0.20734  | 4.43E-05 | 0.000179 |
| ERMN        | 2q24.1        | 0.207328 | 4.44E-05 | 0.00018  |
| DNAH12      | 3p14.3        | -0.20732 | 4.44E-05 | 0.00018  |
| SRSF3       | 6p21.31-p21.2 | -0.20732 | 4.44E-05 | 0.00018  |
| FAM214B     | 9p13.3        | 0.207299 | 4.45E-05 | 0.00018  |
| THAP8       | 19q13.12      | -0.20729 | 4.45E-05 | 0.00018  |
| PCDHGC4     | 5q31.3        | 0.207256 | 4.47E-05 | 0.000181 |
| NUP50       | 22q13.31      | 0.207256 | 4.47E-05 | 0.000181 |
| EIF3IP1     | 7q31.1        | -0.20719 | 4.49E-05 | 0.000182 |
| NPAS3       | 14q13.1       | 0.207153 | 4.51E-05 | 0.000182 |
| DAAM2       | 6p21.2        | 0.207101 | 4.53E-05 | 0.000183 |
| UNC93B1     | 11q13.2       | -0.2071  | 4.53E-05 | 0.000183 |
| EGR3        | 8p21.3        | 0.20708  | 4.54E-05 | 0.000183 |
| SRPRB       | 3q22.1        | -0.20704 | 4.55E-05 | 0.000184 |
| RNF157      | 17q25.1       | -0.20701 | 4.56E-05 | 0.000184 |
| RPL10A      | 6p21.31       | -0.207   | 4.57E-05 | 0.000184 |
| CDC25B      | 20p13         | -0.20699 | 4.57E-05 | 0.000184 |
| POLB        | 8p11.21       | -0.20699 | 4.57E-05 | 0.000184 |
| AAMDC       | 11q14.1       | -0.20696 | 4.58E-05 | 0.000185 |
| CD27        | 12p13.31      | 0.20695  | 4.59E-05 | 0.000185 |
| EVC2        | 4p16.2        | 0.206909 | 4.60E-05 | 0.000186 |
| KLF7        | 2q33.3        | 0.206877 | 4.62E-05 | 0.000186 |
| HS6ST1      | 2q14.3        | -0.20687 | 4.62E-05 | 0.000186 |
| COG4        | 16q22.1       | -0.20685 | 4.63E-05 | 0.000186 |
| SCNN1A      | 12p13.31      | 0.20682  | 4.64E-05 | 0.000187 |
| PARD6B      | 20q13.13      | -0.2068  | 4.65E-05 | 0.000187 |
| NUDT8       | 11q13.2       | -0.20679 | 4.65E-05 | 0.000187 |
| THBD        | 20p11.21      | 0.206788 | 4.65E-05 | 0.000187 |
| BASP1-AS1   | 5p15.1        | 0.206757 | 4.66E-05 | 0.000188 |
| PCDHB10     | 5q31.3        | 0.206737 | 4.67E-05 | 0.000188 |
| ASTN1       | 1q25.2        | 0.206737 | 4.67E-05 | 0.000188 |
| PRRG2       | 19q13.33      | -0.20673 | 4.67E-05 | 0.000188 |
| DDX47       | 12p13.1       | -0.20673 | 4.67E-05 | 0.000188 |
| RIMS1       | 6q13          | 0.206719 | 4.68E-05 | 0.000188 |
| ZNF426      | 19p13.2       | 0.206714 | 4.68E-05 | 0.000188 |
| SCYL3       | 1q24.2        | 0.20671  | 4.68E-05 | 0.000188 |
| THUMPD3-AS1 | 3p25.3        | -0.20667 | 4.70E-05 | 0.000189 |
| RNF149      | 2q11.2        | -0.20667 | 4.70E-05 | 0.000189 |

|           |                |          |          |          |
|-----------|----------------|----------|----------|----------|
| GPNMB     | 7p15.3         | 0.206652 | 4.71E-05 | 0.000189 |
| UCN       | 2p23.3         | -0.20664 | 4.71E-05 | 0.000189 |
| TMEM89    | 3p21.31        | -0.20664 | 4.71E-05 | 0.000189 |
| FUT10     | 8p12           | 0.206634 | 4.71E-05 | 0.000189 |
| PRPF4     | 9q32           | -0.20662 | 4.72E-05 | 0.000189 |
| MXRA5     | Xp22.33        | 0.206607 | 4.72E-05 | 0.00019  |
| TMEM14C   | 6p24.2         | -0.2066  | 4.73E-05 | 0.00019  |
| LMBR1L    | 12q13.12       | -0.20658 | 4.74E-05 | 0.00019  |
| IFT20     | 17q11.2        | -0.20654 | 4.75E-05 | 0.000191 |
| RASGRP4   | 19q13.2        | 0.206532 | 4.76E-05 | 0.000191 |
| PSMC4     | 19q13.2        | -0.20651 | 4.76E-05 | 0.000191 |
| LINC00189 | 21q21.3        | 0.206456 | 4.79E-05 | 0.000192 |
| CDCA4     | 14q32.33       | -0.20645 | 4.79E-05 | 0.000192 |
| SMPDL3A   | 6q22.31        | 0.206417 | 4.80E-05 | 0.000192 |
| CWH43     | 4p11           | 0.206406 | 4.81E-05 | 0.000193 |
| RAB40C    | 16p13.3        | -0.2064  | 4.81E-05 | 0.000193 |
| MTX3      | 5q14.1         | 0.206385 | 4.82E-05 | 0.000193 |
| SH2D2A    | 1q23.1         | -0.20637 | 4.82E-05 | 0.000193 |
| SLC13A3   | 20q13.12       | -0.20629 | 4.86E-05 | 0.000194 |
| GRB14     | 2q24.3         | -0.20628 | 4.86E-05 | 0.000194 |
| EPN2      | 17p11.2        | 0.206276 | 4.86E-05 | 0.000194 |
| PTCHD4    | 6p12.3         | 0.206272 | 4.86E-05 | 0.000195 |
| NSUN3     | 3q11.2         | 0.206233 | 4.88E-05 | 0.000195 |
| FGF19     | 11q13.3        | -0.2062  | 4.89E-05 | 0.000196 |
| ZC3H3     | 8q24.3         | -0.20617 | 4.91E-05 | 0.000196 |
| DYNLL1    | 12q24.31       | -0.20616 | 4.91E-05 | 0.000196 |
| GOLGA8A   | 15q14          | -0.20614 | 4.92E-05 | 0.000197 |
| CYP4F2    | 19p13.12       | -0.20614 | 4.92E-05 | 0.000197 |
| PCDH18    | 4q28.3         | 0.20611  | 4.93E-05 | 0.000197 |
| NFAM1     | 22q13.2        | 0.206106 | 4.93E-05 | 0.000197 |
| CHMP6     | 17q25.3        | -0.2061  | 4.94E-05 | 0.000197 |
| NXF1      | 11q12.3        | -0.20609 | 4.94E-05 | 0.000197 |
| SOX5      | 12p12.1        | 0.206088 | 4.94E-05 | 0.000197 |
| HOXD1     | 2q31.1         | 0.206073 | 4.95E-05 | 0.000197 |
| SNX8      | 7p22.3         | -0.20604 | 4.96E-05 | 0.000198 |
| PDE7B     | 6q23.3         | 0.206037 | 4.96E-05 | 0.000198 |
| P2RX7     | 12q24.31       | 0.206013 | 4.97E-05 | 0.000198 |
| CALCRL    | 2q32.1         | 0.205995 | 4.98E-05 | 0.000199 |
| ANKZF1    | 2q35           | -0.20596 | 5.00E-05 | 0.000199 |
| FOXF2     | 6p25.3         | 0.205918 | 5.01E-05 | 0.0002   |
| SMAD5     | 5q31.1         | 0.205842 | 5.05E-05 | 0.000201 |
| PRADC1    | 2p13.2         | -0.2058  | 5.07E-05 | 0.000202 |
| DOCK4     | 7q31.1         | 0.205796 | 5.07E-05 | 0.000202 |
| LOC153684 | 5p12           | 0.205776 | 5.08E-05 | 0.000202 |
| ABL2      | 1q25.2         | 0.205761 | 5.08E-05 | 0.000202 |
| RBL2      | 16q12.2        | 0.205717 | 5.10E-05 | 0.000203 |
| XKR5      | 8p23.1         | 0.205714 | 5.10E-05 | 0.000203 |
| CD3G      | 11q23.3        | 0.205711 | 5.10E-05 | 0.000203 |
| COL5A1    | 9q34.3         | 0.205702 | 5.11E-05 | 0.000203 |
| IFT57     | 3q13.12-q13.13 | -0.2057  | 5.11E-05 | 0.000203 |
| NOP58     | 2q33.1         | -0.20565 | 5.13E-05 | 0.000204 |
| PHLDB1    | 11q23.3        | 0.205501 | 5.20E-05 | 0.000207 |
| NRF1      | 7q32.2         | -0.20549 | 5.20E-05 | 0.000207 |
| ZNF511    | 10q26.3        | -0.20542 | 5.23E-05 | 0.000208 |
| KIF16B    | 20p12.1        | 0.205416 | 5.24E-05 | 0.000208 |
| EVI2A     | 17q11.2        | 0.205393 | 5.25E-05 | 0.000208 |
| MAB21L1   | 13q13.3        | 0.205372 | 5.25E-05 | 0.000209 |
| SLC5A7    | 2q12.3         | 0.205355 | 5.26E-05 | 0.000209 |

|           |                  |          |          |          |
|-----------|------------------|----------|----------|----------|
| MAFB      | 20q12            | 0.205348 | 5.27E-05 | 0.000209 |
| MFSD14A   | 1p21.2           | 0.205278 | 5.30E-05 | 0.00021  |
| SNORD10   | 17p13.1          | -0.20527 | 5.30E-05 | 0.00021  |
| TLCD4     | 1p21.3           | 0.205196 | 5.33E-05 | 0.000212 |
| CAMSAP1   | 9q34.3           | 0.205157 | 5.35E-05 | 0.000212 |
| KCNIP2    | 10q24.32         | -0.20515 | 5.36E-05 | 0.000212 |
| DYNLT1    | 6q25.3           | -0.20509 | 5.38E-05 | 0.000213 |
| SELPLG    | 12q24.11         | 0.205049 | 5.40E-05 | 0.000214 |
| DBF4      | 7q21.12          | -0.20501 | 5.42E-05 | 0.000215 |
| ANG       | 14q11.2          | 0.205008 | 5.42E-05 | 0.000215 |
| ADCY2     | 5p15.31          | 0.204888 | 5.48E-05 | 0.000217 |
| NFE2L1    | 17q21.32         | 0.204861 | 5.49E-05 | 0.000218 |
| ESS2      | 22q11.21 22q11.2 | -0.20484 | 5.50E-05 | 0.000218 |
| ZSCAN30   | 18q12.2          | 0.204832 | 5.50E-05 | 0.000218 |
| NFATC3    | 16q22.1          | 0.204785 | 5.53E-05 | 0.000219 |
| ZSWIM3    | 20q13.12         | -0.20477 | 5.53E-05 | 0.000219 |
| PODXL2    | 3q21.3           | -0.20474 | 5.55E-05 | 0.00022  |
| HAP1      | 17q21.2          | -0.20474 | 5.55E-05 | 0.00022  |
| FNDC1     | 6q25.3           | 0.204713 | 5.56E-05 | 0.00022  |
| PCNX4     | 14q23.1          | 0.204694 | 5.57E-05 | 0.00022  |
| KLRG2     | 7q34             | -0.20468 | 5.57E-05 | 0.00022  |
| ZNF502    | 3p21.31          | -0.20463 | 5.60E-05 | 0.000221 |
| GPA33     | 1q24.1           | 0.204611 | 5.61E-05 | 0.000222 |
| ATIC      | 2q35             | -0.2046  | 5.62E-05 | 0.000222 |
| BRWD1     | 21q22.2          | 0.204555 | 5.64E-05 | 0.000223 |
| BMS1P20   | 22q11.22         | 0.204534 | 5.65E-05 | 0.000223 |
| PRPS1     | Xq22.3           | -0.20452 | 5.65E-05 | 0.000223 |
| EXT1      | 8q24.11          | 0.204506 | 5.66E-05 | 0.000224 |
| MFNG      | 22q13.1          | 0.204493 | 5.67E-05 | 0.000224 |
| GAL       | 11q13.2          | -0.20448 | 5.67E-05 | 0.000224 |
| STIM2     | 4p15.2           | 0.204475 | 5.67E-05 | 0.000224 |
| ANXA1     | 9q21.13          | 0.204469 | 5.68E-05 | 0.000224 |
| FCMR      | 1q32.1           | 0.204453 | 5.69E-05 | 0.000224 |
| CFH       | 1q31.3           | 0.204373 | 5.72E-05 | 0.000226 |
| RAB11FIP1 | 8p11.23          | 0.204349 | 5.74E-05 | 0.000226 |
| RBM6      | 3p21.31          | -0.20432 | 5.75E-05 | 0.000227 |
| ABHD17B   | 9q21.13          | 0.204298 | 5.76E-05 | 0.000227 |
| CTNND2    | 5p15.2           | 0.204297 | 5.76E-05 | 0.000227 |
| JAM2      | 21q21.3          | 0.204177 | 5.82E-05 | 0.000229 |
| PODN      | 1p32.3           | 0.204142 | 5.84E-05 | 0.00023  |
| CHRNA10   | 11p15.4          | -0.20414 | 5.84E-05 | 0.00023  |
| COX7C     | 5q14.3           | -0.20408 | 5.87E-05 | 0.000231 |
| HIST1H1B  | 6p22.1           | -0.20404 | 5.89E-05 | 0.000232 |
| TK1       | 17q25.3          | -0.204   | 5.91E-05 | 0.000233 |
| ADCY7     | 16q12.1          | 0.203967 | 5.93E-05 | 0.000233 |
| NAT14     | 19q13.42         | -0.20393 | 5.94E-05 | 0.000234 |
| ALDH1L1   | 3q21.3           | 0.203881 | 5.97E-05 | 0.000235 |
| STARD3NL  | 7p14.1           | -0.20379 | 6.02E-05 | 0.000237 |
| TSSK6     | 19p13.11         | -0.20374 | 6.04E-05 | 0.000238 |
| SLC18A1   | 8p21.3           | 0.203731 | 6.05E-05 | 0.000238 |
| HSPA13    | 21q11.2          | 0.203681 | 6.07E-05 | 0.000239 |
| ITGA11    | 15q23            | 0.203673 | 6.08E-05 | 0.000239 |
| TRIM58    | 1q44             | 0.203614 | 6.11E-05 | 0.00024  |
| GIMAP4    | 7q36.1           | 0.203603 | 6.11E-05 | 0.00024  |
| LSM6      | 4q31.22          | -0.20359 | 6.12E-05 | 0.00024  |
| GPR15     | 3q11.2           | 0.20359  | 6.12E-05 | 0.00024  |
| PDPR      | 16q22.1          | 0.203588 | 6.12E-05 | 0.00024  |
| HCLS1     | 3q13.33          | 0.203569 | 6.13E-05 | 0.000241 |

|          |                |          |          |          |
|----------|----------------|----------|----------|----------|
| PRR22    | 19p13.3        | -0.20357 | 6.13E-05 | 0.000241 |
| TRIM28   | 19q13.43       | -0.20355 | 6.14E-05 | 0.000241 |
| UQCRC1   | 3p21.31        | -0.20353 | 6.15E-05 | 0.000241 |
| IL12A    | 3q25.33        | -0.20347 | 6.18E-05 | 0.000242 |
| GCN1     | 12q24.23       | 0.203457 | 6.19E-05 | 0.000243 |
| FLJ23867 | 1q25.2         | 0.203452 | 6.19E-05 | 0.000243 |
| FLRT3    | 20p12.1        | 0.203409 | 6.21E-05 | 0.000244 |
| RRP12    | 10q24.1        | -0.2034  | 6.22E-05 | 0.000244 |
| PROSER3  | 19q13.12       | 0.203398 | 6.22E-05 | 0.000244 |
| ARHGAP28 | 18p11.31       | 0.203397 | 6.22E-05 | 0.000244 |
| GPR55    | 2q37.1         | 0.203366 | 6.24E-05 | 0.000244 |
| MYADM    | 19q13.42       | 0.203354 | 6.24E-05 | 0.000245 |
| TMEM129  | 4p16.3         | -0.20335 | 6.24E-05 | 0.000245 |
| TRMT11   | 6q22.32        | -0.20333 | 6.26E-05 | 0.000245 |
| SMARCE1  | 17q21.2        | -0.20328 | 6.29E-05 | 0.000246 |
| USP15    | 12q14.1        | 0.203271 | 6.29E-05 | 0.000246 |
| TMEM97   | 17q11.2        | -0.20322 | 6.31E-05 | 0.000247 |
| DLC1     | 8p22           | 0.203213 | 6.32E-05 | 0.000247 |
| PDCL     | 9q33.2         | 0.203212 | 6.32E-05 | 0.000247 |
| KCNAB2   | 1p36.31        | -0.20321 | 6.32E-05 | 0.000247 |
| VSTM4    | 10q11.23       | 0.203204 | 6.32E-05 | 0.000247 |
| PAH      | 12q23.2        | -0.20315 | 6.36E-05 | 0.000248 |
| SLC41A1  | 1q32.1         | 0.203117 | 6.37E-05 | 0.000249 |
| SYT10    | 12p11.1        | 0.203117 | 6.37E-05 | 0.000249 |
| PCMTD2   | 20q13.33       | -0.20311 | 6.37E-05 | 0.000249 |
| ZNF138   | 7q11.21        | -0.20311 | 6.37E-05 | 0.000249 |
| NCAM1    | 11q23.2        | 0.203094 | 6.38E-05 | 0.000249 |
| ADGRL3   | 4q13.1         | 0.203063 | 6.40E-05 | 0.00025  |
| KLF11    | 2p25.1         | 0.203062 | 6.40E-05 | 0.00025  |
| PPIAL4D  | 1q21.1         | -0.20305 | 6.41E-05 | 0.00025  |
| ATRIP    | 3p21.31        | -0.20302 | 6.42E-05 | 0.000251 |
| ZBTB7A   | 19p13.3        | 0.203012 | 6.43E-05 | 0.000251 |
| LAIR1    | 19q13.42       | 0.202943 | 6.47E-05 | 0.000252 |
| CEBPE    | 14q11.2        | 0.202941 | 6.47E-05 | 0.000252 |
| ATG9B    | 7q36.1         | -0.20294 | 6.47E-05 | 0.000252 |
| ATP6V0D2 | 8q21.3         | 0.202913 | 6.48E-05 | 0.000253 |
| CSTF1    | 20q13.2-q13.31 | -0.2029  | 6.49E-05 | 0.000253 |
| FCRL3    | 1q23.1         | 0.202892 | 6.49E-05 | 0.000253 |
| NOP53    | 19q13.33       | -0.20287 | 6.51E-05 | 0.000253 |
| NUTM2D   | 10q23.2        | 0.202855 | 6.51E-05 | 0.000254 |
| SOBP     | 6q21           | 0.20284  | 6.52E-05 | 0.000254 |
| JCAD     | 10p11.23       | 0.202826 | 6.53E-05 | 0.000254 |
| ECHS1    | 10q26.3        | -0.20282 | 6.53E-05 | 0.000254 |
| FEZ2     | 2p22.2         | 0.202806 | 6.54E-05 | 0.000255 |
| ZNF469   | 16q24.2        | 0.202784 | 6.55E-05 | 0.000255 |
| PLA2G2D  | 1p36.12        | 0.202769 | 6.56E-05 | 0.000255 |
| MND1     | 4q31.3         | -0.20275 | 6.57E-05 | 0.000256 |
| SDSL     | 12q24.13       | -0.20275 | 6.57E-05 | 0.000256 |
| NAP1L2   | Xq13.2         | 0.202734 | 6.58E-05 | 0.000256 |
| ZDBF2    | 2q33.3         | 0.202711 | 6.59E-05 | 0.000256 |
| TRIM7    | 5q35.3         | 0.202701 | 6.60E-05 | 0.000257 |
| DLX3     | 17q21.33       | -0.2027  | 6.60E-05 | 0.000257 |
| SLC6A14  | Xq23           | 0.202684 | 6.61E-05 | 0.000257 |
| FAAH     | 1p33           | -0.20268 | 6.61E-05 | 0.000257 |
| SLC8A3   | 14q24.2        | 0.202676 | 6.61E-05 | 0.000257 |
| WFDC10A  | 20q13.12       | -0.20267 | 6.62E-05 | 0.000257 |
| TRAF3IP2 | 6q21           | 0.202652 | 6.63E-05 | 0.000257 |
| POC1A    | 3p21.2         | -0.20262 | 6.65E-05 | 0.000258 |

|           |              |          |          |          |
|-----------|--------------|----------|----------|----------|
| SIGLEC17P | 19q13.41     | 0.202604 | 6.65E-05 | 0.000258 |
| NDUFS1    | 2q33.3       | 0.202564 | 6.68E-05 | 0.000259 |
| RHPN2     | 19q13.11     | 0.202555 | 6.68E-05 | 0.000259 |
| ZNF25     | 10p11.21     | 0.202547 | 6.69E-05 | 0.000259 |
| CLIC4     | 1p36.11      | 0.202542 | 6.69E-05 | 0.000259 |
| CHMP2B    | 3p11.2       | 0.202503 | 6.71E-05 | 0.00026  |
| FLJ30679  | 16q24.1      | -0.2025  | 6.71E-05 | 0.00026  |
| SAAL1     | 11p15.1      | -0.2025  | 6.72E-05 | 0.00026  |
| CBL       | 11q23.3      | 0.202478 | 6.73E-05 | 0.000261 |
| ABCD3     | 1p21.3       | 0.202471 | 6.73E-05 | 0.000261 |
| ARIH2     | 3p21.31      | -0.20246 | 6.74E-05 | 0.000261 |
| SEC1P     | 19q13.33     | 0.202422 | 6.76E-05 | 0.000262 |
| PTPN22    | 1p13.2       | 0.202401 | 6.77E-05 | 0.000262 |
| PARP8     | 5q11.1       | 0.20238  | 6.78E-05 | 0.000263 |
| GCNT1     | 9q21.13      | 0.202356 | 6.80E-05 | 0.000263 |
| CYYR1     | 21q21.3      | 0.202341 | 6.80E-05 | 0.000263 |
| SEC24C    | 10q22.2      | 0.202328 | 6.81E-05 | 0.000264 |
| ADGRA2    | 8p11.23      | 0.202311 | 6.82E-05 | 0.000264 |
| ANK1      | 8p11.21      | 0.202308 | 6.82E-05 | 0.000264 |
| KCNK1     | 1q42.2       | 0.202287 | 6.84E-05 | 0.000264 |
| RWDD1     | 6q22.1       | -0.20228 | 6.84E-05 | 0.000264 |
| IFT22     | 7q22.1       | -0.20225 | 6.85E-05 | 0.000265 |
| ZXDB      | Xp11.21      | 0.202254 | 6.85E-05 | 0.000265 |
| TIMP2     | 17q25.3      | 0.202233 | 6.87E-05 | 0.000265 |
| FBXL12    | 19p13.2      | -0.20221 | 6.88E-05 | 0.000266 |
| TMEM270   | 7q11.23      | -0.2022  | 6.88E-05 | 0.000266 |
| HECW2     | 2q32.3       | 0.202189 | 6.89E-05 | 0.000266 |
| C1ORF52   | 1p22.3       | -0.20219 | 6.89E-05 | 0.000266 |
| SPIRE2    | 16q24.3      | -0.20219 | 6.89E-05 | 0.000266 |
| BRIP1     | 17q23.2      | 0.20218  | 6.90E-05 | 0.000266 |
| EHMT2     | 6p21.33      | -0.20217 | 6.90E-05 | 0.000266 |
| TCAP      | 17q12        | -0.20217 | 6.90E-05 | 0.000266 |
| METTL4    | 18p11.32     | 0.202169 | 6.90E-05 | 0.000266 |
| LONP2     | 16q12.1      | 0.202159 | 6.91E-05 | 0.000266 |
| PRH2      | 12p13.2      | -0.20216 | 6.91E-05 | 0.000266 |
| CDYL      | 6p25.1       | 0.202153 | 6.91E-05 | 0.000266 |
| ZNF695    | 1q44         | -0.20213 | 6.93E-05 | 0.000267 |
| B4GALT1   | 9p21.1       | 0.202121 | 6.93E-05 | 0.000267 |
| GPR174    | Xq21.1       | 0.20208  | 6.96E-05 | 0.000268 |
| TNN       | 1q25.1       | 0.202079 | 6.96E-05 | 0.000268 |
| ZHX2      | 8q24.13      | 0.202075 | 6.96E-05 | 0.000268 |
| SPART     | 13q13.3      | 0.202073 | 6.96E-05 | 0.000268 |
| SOWAHB    | 4q21.1       | 0.202072 | 6.96E-05 | 0.000268 |
| SULF1     | 8q13.2-q13.3 | 0.202064 | 6.97E-05 | 0.000268 |
| MRS2      | 6p22.3       | -0.20204 | 6.98E-05 | 0.000269 |
| DNAL1     | 14q24.3      | 0.201969 | 7.02E-05 | 0.00027  |
| VNN2      | 6q23.2       | 0.20196  | 7.03E-05 | 0.00027  |
| SIDT2     | 11q23.3      | 0.201938 | 7.04E-05 | 0.000271 |
| CHST6     | 16q23.1      | 0.201924 | 7.05E-05 | 0.000271 |
| GOLIM4    | 3q26.2       | 0.201923 | 7.05E-05 | 0.000271 |
| RBBP7     | Xp22.2       | -0.20192 | 7.05E-05 | 0.000271 |
| ALDH4A1   | 1p36.13      | -0.2019  | 7.06E-05 | 0.000271 |
| ATP13A1   | 19p13.11     | -0.20189 | 7.07E-05 | 0.000272 |
| SIRPB2    | 20p13        | 0.201881 | 7.07E-05 | 0.000272 |
| COL5A2    | 2q32.2       | 0.201692 | 7.19E-05 | 0.000276 |
| ATG16L2   | 11q13.4      | -0.20168 | 7.19E-05 | 0.000276 |
| NOSTRIN   | 2q24.3       | 0.201667 | 7.20E-05 | 0.000277 |
| MMP16     | 8q21.3       | 0.201666 | 7.20E-05 | 0.000277 |

|             |              |          |          |          |
|-------------|--------------|----------|----------|----------|
| COL8A2      | 1p34.3       | 0.20164  | 7.22E-05 | 0.000277 |
| NSD3        | 8p11.23      | 0.201592 | 7.25E-05 | 0.000278 |
| KCNT2       | 1q31.3       | 0.20159  | 7.25E-05 | 0.000278 |
| TFEC        | 7q31.2       | 0.201584 | 7.25E-05 | 0.000278 |
| LSP1        | 11p15.5      | 0.201583 | 7.25E-05 | 0.000278 |
| TENM3       | 4q34.3-q35.1 | 0.201579 | 7.26E-05 | 0.000278 |
| P2RX1       | 17p13.2      | 0.201559 | 7.27E-05 | 0.000279 |
| TRA2A       | 7p15.3       | -0.20154 | 7.28E-05 | 0.000279 |
| VAT1L       | 16q23.1      | 0.201516 | 7.29E-05 | 0.00028  |
| AAAS        | 12q13.13     | -0.20149 | 7.31E-05 | 0.00028  |
| PPP5C       | 19q13.32     | -0.20147 | 7.32E-05 | 0.000281 |
| IAH1        | 2p25.1       | -0.20144 | 7.34E-05 | 0.000281 |
| SELP        | 1q24.2       | 0.201443 | 7.34E-05 | 0.000281 |
| N4BP2L2-IT2 | 13q13.1      | -0.20144 | 7.34E-05 | 0.000281 |
| PTK2B       | 8p21.2       | 0.201433 | 7.35E-05 | 0.000281 |
| MDS2        | 1p36.11      | -0.20141 | 7.36E-05 | 0.000282 |
| TRAPPC6B    | 14q21.1      | 0.201399 | 7.37E-05 | 0.000282 |
| SUPT16H     | 14q11.2      | 0.201352 | 7.40E-05 | 0.000283 |
| SLIT3       | 5q34-q35.1   | 0.20134  | 7.40E-05 | 0.000283 |
| ACSBG2      | 19p13.3      | -0.20132 | 7.42E-05 | 0.000284 |
| PGM3        | 6q14.1       | 0.201321 | 7.42E-05 | 0.000284 |
| MED8        | 1p34.2       | -0.20131 | 7.42E-05 | 0.000284 |
| VAV1        | 19p13.3      | 0.201279 | 7.44E-05 | 0.000284 |
| PCDHGB7     | 5q31.3       | 0.201227 | 7.47E-05 | 0.000286 |
| KCTD3       | 1q41         | 0.201211 | 7.49E-05 | 0.000286 |
| TMEM150B    | 19q13.42     | -0.20116 | 7.52E-05 | 0.000287 |
| KLHL35      | 11q13.4      | -0.20116 | 7.52E-05 | 0.000287 |
| TSSC2       | 11p15.4      | -0.20109 | 7.56E-05 | 0.000289 |
| CCN4        | 8q24.22      | 0.201083 | 7.57E-05 | 0.000289 |
| ST7-OT4     | 7q31.2       | -0.20107 | 7.57E-05 | 0.000289 |
| UNC5D       | 8p12         | 0.201058 | 7.58E-05 | 0.000289 |
| SHLD1       | 20p12.3      | -0.20105 | 7.59E-05 | 0.000289 |
| DHCR7       | 11q13.4      | -0.20104 | 7.59E-05 | 0.00029  |
| FRMPD2      | 10q11.22     | 0.20104  | 7.59E-05 | 0.00029  |
| USP14       | 18p11.32     | 0.201037 | 7.60E-05 | 0.00029  |
| C3ORF52     | 3q13.2       | 0.201009 | 7.61E-05 | 0.00029  |
| FAM135B     | 8q24.23      | 0.201005 | 7.62E-05 | 0.00029  |
| RIMKLA      | 1p34.2       | 0.200938 | 7.66E-05 | 0.000292 |
| PPP1R18     | 6p21.33      | 0.200826 | 7.73E-05 | 0.000295 |
| PPAN-P2RY11 | 19p13.2      | 0.200824 | 7.73E-05 | 0.000295 |
| ZFPM2       | 8q23.1       | 0.200797 | 7.75E-05 | 0.000295 |
| CD1E        | 1q23.1       | 0.200789 | 7.76E-05 | 0.000295 |
| RBM25       | 14q24.2      | 0.200785 | 7.76E-05 | 0.000295 |
| RASD2       | 22q12.3      | 0.200735 | 7.79E-05 | 0.000297 |
| PPFIA1      | 11q13.3      | 0.20073  | 7.79E-05 | 0.000297 |
| MYLK2       | 20q11.21     | -0.2007  | 7.82E-05 | 0.000297 |
| NAE1        | 16q22.1      | -0.20069 | 7.82E-05 | 0.000298 |
| C2ORF48     | 2p25.1       | -0.20065 | 7.85E-05 | 0.000298 |
| PTTG2       | 4p14         | -0.20063 | 7.86E-05 | 0.000299 |
| SASH3       | Xq26.1       | 0.200608 | 7.87E-05 | 0.000299 |
| DEUP1       | 11q21        | 0.200584 | 7.89E-05 | 0.0003   |
| PSMC5       | 17q23.3      | -0.20052 | 7.93E-05 | 0.000302 |
| RAB43       | 3q21.3       | 0.200489 | 7.95E-05 | 0.000302 |
| GAB2        | 11q14.1      | 0.200488 | 7.95E-05 | 0.000302 |
| ITPRIP      | 10q25.1      | 0.200347 | 8.05E-05 | 0.000306 |
| HCK         | 20q11.21     | 0.200342 | 8.05E-05 | 0.000306 |
| DSCR9       | 21q22.13     | -0.20032 | 8.06E-05 | 0.000306 |
| EMC9        | 14q12        | -0.20028 | 8.09E-05 | 0.000307 |

|          |               |          |          |          |
|----------|---------------|----------|----------|----------|
| RGMA     | 15q26.1       | 0.200274 | 8.10E-05 | 0.000307 |
| FCN3     | 1p36.11       | -0.20027 | 8.10E-05 | 0.000307 |
| MS4A6A   | 11q12.2       | 0.200266 | 8.10E-05 | 0.000307 |
| ARPC1A   | 7q22.1        | -0.20025 | 8.11E-05 | 0.000308 |
| KPTN     | 19q13.32      | -0.20025 | 8.12E-05 | 0.000308 |
| SNHG5    | 6q14.3        | -0.20024 | 8.12E-05 | 0.000308 |
| LPXN     | 11q12.1       | 0.200224 | 8.13E-05 | 0.000308 |
| APPL2    | 12q23.3       | 0.20019  | 8.15E-05 | 0.000309 |
| TMEM91   | 19q13.2       | -0.20013 | 8.19E-05 | 0.000311 |
| TSPAN8   | 12q21.1       | 0.200123 | 8.20E-05 | 0.000311 |
| RAP2B    | 3q25.2        | 0.200103 | 8.21E-05 | 0.000311 |
| MAGEA11  | Xq28          | -0.20003 | 8.26E-05 | 0.000313 |
| ARGLU1   | 13q33.3       | -0.20003 | 8.26E-05 | 0.000313 |
| ENC1     | 5q13.3        | 0.200025 | 8.27E-05 | 0.000313 |
| FAM222A  | 12q24.11      | -0.20002 | 8.27E-05 | 0.000313 |
| STPG3    | 9q34.3        | -0.20001 | 8.28E-05 | 0.000313 |
| MED26    | 19p13.11      | -0.20001 | 8.28E-05 | 0.000313 |
| JAML     | 11q23.3       | 0.19998  | 8.30E-05 | 0.000314 |
| VOPP1    | 7p11.2        | -0.19998 | 8.30E-05 | 0.000314 |
| PSMD7    | 16q23.1       | -0.19996 | 8.32E-05 | 0.000315 |
| ESPN     | 1p36.31       | -0.19991 | 8.35E-05 | 0.000316 |
| PTGDR    | 14q22.1       | 0.199895 | 8.36E-05 | 0.000316 |
| LGALS9B  | 17p11.2       | 0.199891 | 8.36E-05 | 0.000316 |
| IMPG2    | 3q12.3        | 0.199885 | 8.37E-05 | 0.000316 |
| MRV1     | 11p15.4       | 0.199878 | 8.37E-05 | 0.000316 |
| HHIP     | 4q31.21       | 0.199852 | 8.39E-05 | 0.000317 |
| PIP5K1A  | 1q21.3        | 0.199824 | 8.41E-05 | 0.000318 |
| DUOX2    | 15q21.1       | 0.199771 | 8.45E-05 | 0.000319 |
| MEI1     | 22q13.2       | 0.19977  | 8.45E-05 | 0.000319 |
| MS4A8    | 11q12.2       | 0.199747 | 8.46E-05 | 0.000319 |
| LOC90784 | 2p11.2        | 0.199733 | 8.47E-05 | 0.00032  |
| TAT      | 16q22.2       | 0.1997   | 8.50E-05 | 0.000321 |
| UNC93A   | 6q27          | -0.1997  | 8.50E-05 | 0.000321 |
| PMM1     | 22q13.2       | -0.19965 | 8.53E-05 | 0.000322 |
| NASP     | 1p34.1        | -0.19962 | 8.55E-05 | 0.000323 |
| CLEC7A   | 12p13.2       | 0.199573 | 8.59E-05 | 0.000324 |
| POLR3E   | 16p12.2       | -0.19956 | 8.60E-05 | 0.000324 |
| MCTP1    | 5q15          | 0.199529 | 8.62E-05 | 0.000325 |
| CSTF2T   | 10q21.1       | 0.19952  | 8.62E-05 | 0.000325 |
| UGGT1    | 2q14.3        | 0.199509 | 8.63E-05 | 0.000325 |
| LIPT1    | 2q11.2        | -0.19949 | 8.64E-05 | 0.000326 |
| DDN      | 12q13.12      | -0.19949 | 8.65E-05 | 0.000326 |
| PRR11    | 17q22         | 0.199487 | 8.65E-05 | 0.000326 |
| RPRD1A   | 18q12.2       | 0.199469 | 8.66E-05 | 0.000326 |
| CYP4B1   | 1p33          | -0.19946 | 8.66E-05 | 0.000326 |
| SMURF2   | 17q23.3-q24.1 | 0.199417 | 8.70E-05 | 0.000327 |
| NBR2     | 17q21.31      | -0.19941 | 8.71E-05 | 0.000328 |
| SPIB     | 19q13.33      | 0.199399 | 8.71E-05 | 0.000328 |
| GYG2     | Xp22.33       | -0.1994  | 8.71E-05 | 0.000328 |
| KLC1     | 14q32.33      | 0.199392 | 8.72E-05 | 0.000328 |
| TMEM141  | 9q34.3        | -0.19939 | 8.72E-05 | 0.000328 |
| RACK1    | 5q35.3        | -0.19938 | 8.72E-05 | 0.000328 |
| JKAMP    | 14q23.1       | 0.199376 | 8.73E-05 | 0.000328 |
| AQP3     | 9p13.3        | 0.199375 | 8.73E-05 | 0.000328 |
| TRIM16   | 17p12         | 0.19934  | 8.75E-05 | 0.000329 |
| BAAT     | 9q31.1        | -0.19932 | 8.77E-05 | 0.000329 |
| CNTN2    | 1q32.1        | 0.199312 | 8.78E-05 | 0.00033  |
| TSFM     | 12q14.1       | -0.19927 | 8.81E-05 | 0.000331 |

|           |                 |          |          |          |
|-----------|-----------------|----------|----------|----------|
| YWHAH     | 22q12.3         | 0.199267 | 8.81E-05 | 0.000331 |
| TUBB4B    | 9q34.3          | -0.19927 | 8.81E-05 | 0.000331 |
| DSG4      | 18q12.1         | 0.199259 | 8.81E-05 | 0.000331 |
| TONSL     | 8q24.3          | -0.1992  | 8.86E-05 | 0.000332 |
| SI        | 3q26.1          | 0.199173 | 8.88E-05 | 0.000333 |
| PRR15L    | 17q21.32        | -0.19914 | 8.90E-05 | 0.000334 |
| FLVCR2    | 14q24.3         | 0.199136 | 8.91E-05 | 0.000334 |
| RNF24     | 20p13           | 0.199088 | 8.94E-05 | 0.000335 |
| GPR31     | 6q27            | 0.199086 | 8.94E-05 | 0.000335 |
| LMTK3     | 19q13.33        | -0.19905 | 8.97E-05 | 0.000336 |
| PELI2     | 14q22.3         | 0.199046 | 8.97E-05 | 0.000336 |
| COQ7      | 16p12.3         | -0.19903 | 8.99E-05 | 0.000337 |
| TOR2A     | 9q34.11         | -0.19901 | 9.00E-05 | 0.000337 |
| ARHGAP22  | 10q11.22-q11.23 | 0.198984 | 9.02E-05 | 0.000338 |
| PPIAL4C   | 1q21.2          | -0.19896 | 9.03E-05 | 0.000338 |
| STMN3     | 20q13.33        | -0.19895 | 9.04E-05 | 0.000339 |
| KCTD13    | 16p11.2         | -0.19892 | 9.07E-05 | 0.000339 |
| DPAGT1    | 11q23.3         | -0.1989  | 9.08E-05 | 0.00034  |
| TMUB2     | 17q21.31        | -0.1989  | 9.08E-05 | 0.00034  |
| PRND      | 20p13           | 0.198894 | 9.09E-05 | 0.00034  |
| LMOD1     | 1q32.1          | 0.198893 | 9.09E-05 | 0.00034  |
| CD68      | 17p13.1         | 0.198859 | 9.11E-05 | 0.000341 |
| CBR1      | 21q22.12        | -0.19885 | 9.12E-05 | 0.000341 |
| LINC00589 | 8p12            | 0.198835 | 9.13E-05 | 0.000341 |
| OPTN      | 10p13           | 0.198799 | 9.16E-05 | 0.000342 |
| CROCC     | 1p36.13         | -0.19877 | 9.18E-05 | 0.000343 |
| LRCH2     | Xq23            | 0.198758 | 9.19E-05 | 0.000343 |
| ADGRF5    | 6p12.3          | 0.198717 | 9.22E-05 | 0.000344 |
| RER1      | 1p36.32         | -0.1987  | 9.23E-05 | 0.000345 |
| CNTNAP2   | 7q35-q36.1      | -0.19866 | 9.27E-05 | 0.000346 |
| MOXD1     | 6q23.2          | 0.198637 | 9.28E-05 | 0.000347 |
| KRT15     | 17q21.2         | -0.1986  | 9.31E-05 | 0.000348 |
| TOP3A     | 17p11.2         | 0.198579 | 9.33E-05 | 0.000348 |
| SLC30A9   | 4p13            | 0.198578 | 9.33E-05 | 0.000348 |
| PLEKHG5   | 1p36.31         | -0.19855 | 9.35E-05 | 0.000349 |
| NCEH1     | 3q26.31         | 0.198537 | 9.36E-05 | 0.000349 |
| NUDT15    | 13q14.2         | -0.19853 | 9.36E-05 | 0.000349 |
| CILP      | 15q22.31        | 0.198503 | 9.39E-05 | 0.00035  |
| F3        | 1p21.3          | 0.198503 | 9.39E-05 | 0.00035  |
| RICTOR    | 5p13.1          | 0.198463 | 9.42E-05 | 0.000351 |
| ATAD2B    | 2p24.1-p23.3    | 0.198431 | 9.44E-05 | 0.000352 |
| GUCY1A1   | 4q32.1          | 0.198354 | 9.50E-05 | 0.000354 |
| ADH1B     | 4q23            | 0.19835  | 9.51E-05 | 0.000354 |
| SYNM      | 15q26.3         | 0.198323 | 9.53E-05 | 0.000355 |
| MINAR1    | 15q25.1         | 0.198319 | 9.53E-05 | 0.000355 |
| PPP1R13B  | 14q32.33        | 0.198294 | 9.55E-05 | 0.000356 |
| DMAC2     | 19q13.2         | -0.19827 | 9.57E-05 | 0.000356 |
| RPL7      | 8q21.11         | -0.19825 | 9.58E-05 | 0.000357 |
| ADGRB3    | 6q12-q13        | 0.198236 | 9.60E-05 | 0.000357 |
| ARHGEF40  | 14q11.2         | 0.198226 | 9.61E-05 | 0.000357 |
| EFNA4     | 1q21.3          | -0.19822 | 9.61E-05 | 0.000357 |
| PRSS16    | 6p22.1          | 0.198219 | 9.61E-05 | 0.000357 |
| FUT8      | 14q23.3         | 0.198206 | 9.62E-05 | 0.000358 |
| HERPUD1   | 16q13           | 0.198186 | 9.64E-05 | 0.000358 |
| DENND1A   | 9q33.3          | -0.19818 | 9.64E-05 | 0.000358 |
| IGFBP5    | 2q35            | 0.198169 | 9.65E-05 | 0.000359 |
| DBT       | 1p21.2          | 0.198136 | 9.68E-05 | 0.00036  |
| GPC6      | 13q31.3-q32.1   | 0.198101 | 9.70E-05 | 0.000361 |



|          |          |          |          |          |
|----------|----------|----------|----------|----------|
| ST18     | 8q11.23  | 0.198097 | 9.71E-05 | 0.000361 |
| KCNB2    | 8q21.11  | 0.198075 | 9.73E-05 | 0.000361 |
| HHLA3    | 1p31.1   | -0.19804 | 9.75E-05 | 0.000362 |
| ZNF738   | 19p12    | -0.19794 | 9.83E-05 | 0.000365 |
| GMCL2    | 5q35.3   | 0.197921 | 9.85E-05 | 0.000366 |
| GOLPH3   | 5p13.3   | 0.197887 | 9.88E-05 | 0.000367 |
| FAM45A   | 10q26.11 | 0.197884 | 9.88E-05 | 0.000367 |
| ZNF70    | 22q11.23 | 0.197804 | 9.95E-05 | 0.000369 |
| USP44    | 12q22    | 0.197784 | 9.96E-05 | 0.000369 |
| PRDM12   | 9q34.12  | -0.19778 | 9.97E-05 | 0.00037  |
| PRTG     | 15q21.3  | 0.197724 | 0.0001   | 0.000371 |
| LOC90246 | 3q21.3   | 0.197683 | 0.0001   | 0.000372 |
| UBR4     | 1p36.13  | 0.197665 | 0.000101 | 0.000373 |
| LGI2     | 4p15.2   | 0.197654 | 0.000101 | 0.000373 |
| PLN      | 6q22.31  | 0.197652 | 0.000101 | 0.000373 |
| MSRB2    | 10p12.2  | -0.1976  | 0.000101 | 0.000375 |
| TMEM273  | 10q11.23 | 0.197577 | 0.000101 | 0.000375 |
| UXS1     | 2q12.2   | -0.19757 | 0.000101 | 0.000375 |
| C9ORF152 | 9q31.3   | 0.197572 | 0.000101 | 0.000375 |
| FAF2     | 5q35.2   | 0.197557 | 0.000102 | 0.000376 |
| OPLAH    | 8q24.3   | -0.19752 | 0.000102 | 0.000377 |
| SPARCL1  | 4q22.1   | 0.197499 | 0.000102 | 0.000377 |
| COL11A1  | 1p21.1   | 0.197476 | 0.000102 | 0.000378 |
| CNGA1    | 4p12     | 0.197475 | 0.000102 | 0.000378 |
| TTLL3    | 3p25.3   | -0.19747 | 0.000102 | 0.000378 |
| IL18R1   | 2q12.1   | 0.197468 | 0.000102 | 0.000378 |
| LTV1     | 6q24.2   | -0.19742 | 0.000103 | 0.000379 |
| LSM14B   | 20q13.33 | -0.19742 | 0.000103 | 0.00038  |
| RIPK2    | 8q21.3   | -0.19741 | 0.000103 | 0.00038  |
| F13A1    | 6p25.1   | 0.197396 | 0.000103 | 0.00038  |
| PCDHGA4  | 5q31.3   | 0.197353 | 0.000103 | 0.000381 |
| TH       | 11p15.5  | -0.19734 | 0.000103 | 0.000382 |
| MVK      | 12q24.11 | -0.19732 | 0.000103 | 0.000382 |
| IGSF6    | 16p12.2  | 0.197291 | 0.000104 | 0.000383 |
| B4GAT1   | 11q13.2  | -0.19721 | 0.000104 | 0.000385 |
| CNNM2    | 10q24.32 | 0.197195 | 0.000105 | 0.000386 |
| CCDC28B  | 1p35.2   | -0.19719 | 0.000105 | 0.000386 |
| TUSC3    | 8p22     | 0.197164 | 0.000105 | 0.000387 |
| ZNF561   | 19p13.2  | 0.197129 | 0.000105 | 0.000388 |
| MFAP5    | 12p13.31 | 0.197097 | 0.000105 | 0.000389 |
| GJA1     | 6q22.31  | 0.19709  | 0.000106 | 0.000389 |
| PDE3B    | 11p15.2  | 0.197067 | 0.000106 | 0.00039  |
| SDHAF4   | 6q13     | -0.19703 | 0.000106 | 0.000391 |
| BCKDK    | 16p11.2  | -0.197   | 0.000106 | 0.000392 |
| MYCBP    | 1p34.3   | -0.19697 | 0.000107 | 0.000393 |
| OAZ2     | 15q22.31 | 0.196965 | 0.000107 | 0.000393 |
| LMO2     | 11p13    | 0.196964 | 0.000107 | 0.000393 |
| TRAPPC2B | 19q13.43 | -0.19696 | 0.000107 | 0.000393 |
| ZNF124   | 1q44     | 0.196955 | 0.000107 | 0.000393 |
| PSMB5    | 14q11.2  | -0.19695 | 0.000107 | 0.000393 |
| SND1-IT1 | 7q32.1   | -0.19694 | 0.000107 | 0.000393 |
| CDIPT    | 16p11.2  | -0.19691 | 0.000107 | 0.000394 |
| SFI1     | 22q12.2  | -0.19687 | 0.000107 | 0.000395 |
| CDH5     | 16q21    | 0.196838 | 0.000108 | 0.000396 |
| ZWILCH   | 15q22.31 | 0.196808 | 0.000108 | 0.000397 |
| SPIRE1   | 18p11.21 | 0.196794 | 0.000108 | 0.000397 |
| YTHDC2   | 5q22.2   | 0.196764 | 0.000108 | 0.000398 |
| EHD2     | 19q13.33 | 0.196755 | 0.000108 | 0.000399 |

|              |          |          |          |          |
|--------------|----------|----------|----------|----------|
| CRIPT        | 2p21     | -0.19674 | 0.000109 | 0.000399 |
| SOHLH1       | 9q34.3   | -0.19672 | 0.000109 | 0.0004   |
| TPT1         | 13q14.13 | -0.19669 | 0.000109 | 0.0004   |
| GAL3ST2      | 2q37.3   | 0.196665 | 0.000109 | 0.000401 |
| ZNF584       | 19q13.43 | -0.19666 | 0.000109 | 0.000401 |
| SLC30A7      | 1p21.2   | 0.196647 | 0.000109 | 0.000402 |
| VPS72        | 1q21.3   | -0.19664 | 0.00011  | 0.000402 |
| SMN2         | 5q13.2   | -0.19663 | 0.00011  | 0.000402 |
| SH2D5        | 1p36.12  | -0.19661 | 0.00011  | 0.000403 |
| PLCL1        | 2q33.1   | 0.196589 | 0.00011  | 0.000403 |
| C9ORF116     | 9q34.3   | -0.19658 | 0.00011  | 0.000404 |
| USPL1        | 13q12.3  | -0.19658 | 0.00011  | 0.000404 |
| SLC43A1      | 11q12.1  | -0.19657 | 0.00011  | 0.000404 |
| ZNF835       | 19q13.43 | 0.19657  | 0.00011  | 0.000404 |
| LRRC61       | 7q36.1   | -0.19656 | 0.00011  | 0.000404 |
| OR56B4       | 11p15.4  | 0.196542 | 0.00011  | 0.000404 |
| FAM78A       | 9q34.13  | 0.196504 | 0.000111 | 0.000406 |
| SNX17        | 2p23.3   | -0.1965  | 0.000111 | 0.000406 |
| SNRFB2       | 20p12.1  | -0.19647 | 0.000111 | 0.000407 |
| LINC01140    | 1p22.3   | 0.196466 | 0.000111 | 0.000407 |
| ATMIN        | 16q23.2  | 0.196455 | 0.000111 | 0.000407 |
| MRPL9        | 1q21.3   | -0.19645 | 0.000111 | 0.000407 |
| C6ORF89      | 6p21.2   | 0.196448 | 0.000111 | 0.000407 |
| SCN3B        | 11q24.1  | 0.196425 | 0.000111 | 0.000408 |
| FBXO8        | 4q34.1   | 0.196416 | 0.000112 | 0.000408 |
| FMNL1        | 17q21.31 | 0.196395 | 0.000112 | 0.000409 |
| AKIRIN2      | 6q15     | -0.19637 | 0.000112 | 0.000409 |
| MIPEP        | 13q12.12 | -0.19634 | 0.000112 | 0.00041  |
| ZNF750       | 17q25.3  | 0.196311 | 0.000112 | 0.000411 |
| SLC4A7       | 3p24.1   | 0.1963   | 0.000113 | 0.000412 |
| ADGRF3       | 2p23.3   | -0.19627 | 0.000113 | 0.000412 |
| SPIN2B       | Xp11.21  | -0.19626 | 0.000113 | 0.000413 |
| KCTD15       | 19q13.11 | 0.196239 | 0.000113 | 0.000413 |
| FEN1         | 11q12.2  | -0.19623 | 0.000113 | 0.000414 |
| TMED7-TICAM2 | 5q22.3   | 0.196196 | 0.000114 | 0.000415 |
| ABCA8        | 17q24.2  | 0.196163 | 0.000114 | 0.000416 |
| FOS          | 14q24.3  | 0.196137 | 0.000114 | 0.000417 |
| FAM151B      | 5q14.1   | 0.196115 | 0.000114 | 0.000417 |
| HIST1H2AE    | 6p22.2   | -0.19609 | 0.000115 | 0.000418 |
| PRICKLE2     | 3p14.1   | 0.196061 | 0.000115 | 0.000419 |
| SPATS2L      | 2q33.1   | 0.196032 | 0.000115 | 0.00042  |
| TNFSF4       | 1q25.1   | 0.196008 | 0.000115 | 0.000421 |
| AFTPH        | 2p14     | 0.195995 | 0.000115 | 0.000421 |
| OTUD7A       | 15q13.3  | 0.19597  | 0.000116 | 0.000422 |
| NAPSB        | 19q13.33 | 0.195934 | 0.000116 | 0.000423 |
| CARD8        | 19q13.33 | 0.195932 | 0.000116 | 0.000423 |
| MTA1         | 14q32.33 | -0.19593 | 0.000116 | 0.000423 |
| CAMK1D       | 10p13    | 0.19592  | 0.000116 | 0.000423 |
| INTS12       | 4q24     | -0.19591 | 0.000116 | 0.000424 |
| SNCA         | 4q22.1   | 0.195896 | 0.000116 | 0.000424 |
| RPLP0        | 12q24.23 | -0.19583 | 0.000117 | 0.000426 |
| PKLR         | 1q22     | -0.19583 | 0.000117 | 0.000426 |
| ZNF660       | 3p21.31  | 0.195808 | 0.000117 | 0.000427 |
| CPTP         | 1p36.33  | -0.19576 | 0.000118 | 0.000428 |
| VEGFB        | 11q13.1  | -0.19571 | 0.000118 | 0.00043  |
| MAP7         | 6q23.3   | 0.195686 | 0.000118 | 0.000431 |
| ARL4A        | 7p21.3   | -0.19566 | 0.000119 | 0.000432 |
| VCAM1        | 1p21.2   | 0.195627 | 0.000119 | 0.000433 |

|            |            |          |          |          |
|------------|------------|----------|----------|----------|
| TLE3       | 15q23      | 0.195617 | 0.000119 | 0.000433 |
| SCG2       | 2q36.1     | 0.195613 | 0.000119 | 0.000433 |
| TMEM115    | 3p21.31    | -0.19561 | 0.000119 | 0.000433 |
| MAN1C1     | 1p36.11    | 0.195607 | 0.000119 | 0.000433 |
| TCOF1      | 5q32-q33.1 | -0.19559 | 0.000119 | 0.000433 |
| EML4       | 2p21       | 0.195582 | 0.000119 | 0.000434 |
| TNFRSF13B  | 17p11.2    | 0.195575 | 0.000119 | 0.000434 |
| ELAVL1     | 19p13.2    | -0.19557 | 0.00012  | 0.000434 |
| NRXN1      | 2p16.3     | 0.195565 | 0.00012  | 0.000434 |
| CSGALNACT1 | 8p21.3     | 0.195565 | 0.00012  | 0.000434 |
| SLX4IP     | 20p12.2    | 0.19555  | 0.00012  | 0.000434 |
| COX19      | 7p22.3     | -0.19555 | 0.00012  | 0.000434 |
| PFN4       | 2p23.3     | -0.19551 | 0.00012  | 0.000436 |
| HLA-DQA1   | 6p21.32    | 0.195478 | 0.00012  | 0.000437 |
| LINC00174  | 7q11.21    | -0.19546 | 0.000121 | 0.000437 |
| TMEM255B   | 13q34      | -0.19546 | 0.000121 | 0.000437 |
| NCF1B      | 7q11.23    | 0.195458 | 0.000121 | 0.000437 |
| LIMK2      | 22q12.2    | 0.19545  | 0.000121 | 0.000438 |
| DPF2       | 11q13.1    | -0.19543 | 0.000121 | 0.000438 |
| TAMM41     | 3p25.2     | -0.19543 | 0.000121 | 0.000438 |
| ZC3HAV1L   | 7q34       | 0.195423 | 0.000121 | 0.000438 |
| NCF2       | 1q25.3     | 0.195405 | 0.000121 | 0.000439 |
| DYSF       | 2p13.2     | 0.195396 | 0.000121 | 0.000439 |
| BBS4       | 15q24.1    | 0.19539  | 0.000121 | 0.000439 |
| LIN52      | 14q24.3    | 0.195343 | 0.000122 | 0.000441 |
| CALD1      | 7q33       | 0.1953   | 0.000122 | 0.000442 |
| SH2D4A     | 8p21.3     | 0.195298 | 0.000122 | 0.000442 |
| LPAR5      | 12p13.31   | 0.195297 | 0.000122 | 0.000442 |
| RTN1       | 14q23.1    | 0.195253 | 0.000123 | 0.000444 |
| CDK16      | Xp11.3     | -0.19522 | 0.000123 | 0.000445 |
| FZR1       | 19p13.3    | -0.19517 | 0.000124 | 0.000447 |
| PTPRH      | 19q13.42   | 0.195119 | 0.000124 | 0.000448 |
| CELF5      | 19p13.3    | -0.19512 | 0.000124 | 0.000448 |
| POLR3B     | 12q23.3    | 0.195105 | 0.000124 | 0.000449 |
| METTL27    | 7q11.23    | -0.1951  | 0.000124 | 0.000449 |
| GKAP1      | 9q21.32    | -0.1951  | 0.000124 | 0.000449 |
| MSRB3      | 12q14.3    | 0.195095 | 0.000124 | 0.000449 |
| CXCR5      | 11q23.3    | 0.195082 | 0.000124 | 0.000449 |
| FAM166B    | 9p13.3     | -0.19508 | 0.000124 | 0.000449 |
| LAMP1      | 13q34      | -0.19504 | 0.000125 | 0.000451 |
| UPF3B      | Xq24       | -0.19502 | 0.000125 | 0.000451 |
| CTBS       | 1p22.3     | 0.194993 | 0.000125 | 0.000452 |
| PSMB6      | 17p13.2    | -0.19498 | 0.000125 | 0.000453 |
| SCN2B      | 11q23.3    | 0.194946 | 0.000126 | 0.000454 |
| JADE3      | Xp11.3     | -0.19494 | 0.000126 | 0.000454 |
| MAF        | 16q23.2    | 0.194942 | 0.000126 | 0.000454 |
| FAM120A    | 9q22.31    | 0.194934 | 0.000126 | 0.000454 |
| SH2B3      | 12q24.12   | 0.19492  | 0.000126 | 0.000454 |
| RTEL1      | 20q13.33   | -0.1949  | 0.000126 | 0.000455 |
| LINC01003  | 7q36.1     | -0.19486 | 0.000127 | 0.000456 |
| PITPNA     | 17p13.3    | 0.194818 | 0.000127 | 0.000458 |
| RPS3A      | 4q31.3     | -0.19481 | 0.000127 | 0.000458 |
| PGBD3      | 10q11.23   | 0.194789 | 0.000127 | 0.000459 |
| MRPL24     | 1q23.1     | -0.19479 | 0.000127 | 0.000459 |
| CD33       | 19q13.41   | 0.19477  | 0.000128 | 0.00046  |
| PIK3AP1    | 10q24.1    | 0.194717 | 0.000128 | 0.000461 |
| ATP5MC3    | 2q31.1     | -0.1947  | 0.000128 | 0.000462 |
| CUL1       | 7q36.1     | -0.19467 | 0.000129 | 0.000463 |

|              |               |          |          |          |
|--------------|---------------|----------|----------|----------|
| FTO          | 16q12.2       | 0.194659 | 0.000129 | 0.000463 |
| PRSS22       | 16p13.3       | -0.19465 | 0.000129 | 0.000464 |
| PI4KAP1      | 22q11.21      | -0.19464 | 0.000129 | 0.000464 |
| CMIP         | 16q23.2-q23.3 | 0.194638 | 0.000129 | 0.000464 |
| AZI2         | 3p24.1        | 0.19463  | 0.000129 | 0.000464 |
| SAV1         | 14q22.1       | 0.194627 | 0.000129 | 0.000464 |
| CCR1         | 3p21.31       | 0.194581 | 0.00013  | 0.000466 |
| ARVCF        | 22q11.21      | -0.19452 | 0.00013  | 0.000468 |
| PERM1        | 1p36.33       | -0.19452 | 0.00013  | 0.000468 |
| SZRD1        | 1p36.13       | -0.19451 | 0.00013  | 0.000468 |
| NID1         | 1q42.3        | 0.194506 | 0.00013  | 0.000468 |
| ALOX5AP      | 13q12.3       | 0.194497 | 0.00013  | 0.000469 |
| ERAP1        | 5q15          | 0.194428 | 0.000131 | 0.000471 |
| DDX11        | 12p11.21      | -0.19437 | 0.000132 | 0.000473 |
| YTHDC1       | 4q13.2        | 0.194368 | 0.000132 | 0.000473 |
| CDH19        | 18q22.1       | 0.194325 | 0.000132 | 0.000475 |
| CP           | 3q24-q25.1    | 0.194318 | 0.000132 | 0.000475 |
| TUBB4A       | 19p13.3       | -0.19428 | 0.000133 | 0.000476 |
| SCARNA9      | 11q21         | -0.19422 | 0.000133 | 0.000479 |
| PXK          | 3p14.3        | 0.194213 | 0.000134 | 0.000479 |
| PABPN1       | 14q11.2       | -0.19416 | 0.000134 | 0.000481 |
| LOC100126784 | 11p15.1       | 0.1941   | 0.000135 | 0.000483 |
| C10ORF25     | 10q11.21      | 0.194085 | 0.000135 | 0.000484 |
| LINC00261    | 20p11.21      | 0.194072 | 0.000135 | 0.000484 |
| NDUFC1       | 4q31.1        | -0.19405 | 0.000135 | 0.000485 |
| CHD4         | 12p13.31      | 0.194044 | 0.000135 | 0.000485 |
| RAB11FIP5    | 2p13.2        | 0.194041 | 0.000135 | 0.000485 |
| GINS1        | 20p11.21      | -0.19403 | 0.000136 | 0.000485 |
| IL2RA        | 10p15.1       | 0.194022 | 0.000136 | 0.000486 |
| PLEK         | 2p14          | 0.193989 | 0.000136 | 0.000487 |
| HIST1H4I     | 6p22.1        | -0.19399 | 0.000136 | 0.000487 |
| WNT11        | 11q13.5       | -0.19397 | 0.000136 | 0.000487 |
| TMEM45A      | 3q12.2        | 0.193958 | 0.000136 | 0.000488 |
| SLC35B3      | 6p24.3        | 0.193952 | 0.000136 | 0.000488 |
| NRAP         | 10q25.3       | 0.193941 | 0.000137 | 0.000488 |
| VLDLR        | 9p24.2        | 0.193907 | 0.000137 | 0.000489 |
| MAP3K1       | 5q11.2        | 0.193869 | 0.000137 | 0.000491 |
| ASGR1        | 17p13.1       | -0.19385 | 0.000138 | 0.000492 |
| PRDM6        | 5q23.2        | 0.193846 | 0.000138 | 0.000492 |
| PMP22        | 17p12         | 0.193764 | 0.000138 | 0.000495 |
| ADTRP        | 6p24.1        | 0.193757 | 0.000139 | 0.000495 |
| GPD1         | 12q13.12      | -0.19374 | 0.000139 | 0.000496 |
| CSF1         | 1p13.3        | 0.193733 | 0.000139 | 0.000496 |
| SLC10A7      | 4q31.22       | 0.193731 | 0.000139 | 0.000496 |
| TMEM173      | 5q31.2        | 0.193723 | 0.000139 | 0.000496 |
| TMEM167A     | 5q14.2        | 0.193706 | 0.000139 | 0.000497 |
| LCP2         | 5q35.1        | 0.19369  | 0.000139 | 0.000497 |
| EXOSC9       | 4q27          | -0.19365 | 0.00014  | 0.000499 |
| GCNA         | Xq13.1        | -0.19364 | 0.00014  | 0.000499 |
| SRPK2        | 7q22.3        | 0.193634 | 0.00014  | 0.000499 |
| MZT1         | 13q21.33      | -0.19356 | 0.000141 | 0.000502 |
| EMC6         | 17p13.2       | -0.19355 | 0.000141 | 0.000503 |
| ADAMTS5      | 21q21.3       | 0.193529 | 0.000141 | 0.000503 |
| LRRC25       | 19p13.11      | 0.193482 | 0.000142 | 0.000505 |
| RPL23AP53    | 8p23.3        | 0.193469 | 0.000142 | 0.000505 |
| FAM219B      | 15q24.1-q24.2 | 0.193464 | 0.000142 | 0.000506 |
| FAM168B      | 2q21.1        | 0.193425 | 0.000142 | 0.000507 |
| MUS81        | 11q13.1       | -0.19342 | 0.000142 | 0.000507 |

|           |                |          |          |          |
|-----------|----------------|----------|----------|----------|
| BCL9      | 1q21.2         | 0.193407 | 0.000143 | 0.000508 |
| NUDCD1    | 8q23.1         | -0.19337 | 0.000143 | 0.000509 |
| RHEX      | 1q32.1         | 0.193333 | 0.000143 | 0.00051  |
| RGPD4     | 2q12.3         | 0.193309 | 0.000144 | 0.000511 |
| LRRK2     | 12q12          | 0.193272 | 0.000144 | 0.000513 |
| MDN1      | 6q15           | 0.193222 | 0.000145 | 0.000515 |
| ST8SIA1   | 12p12.1        | 0.193176 | 0.000145 | 0.000517 |
| SUSD4     | 1q41           | 0.193145 | 0.000146 | 0.000518 |
| TOMM20L   | 14q23.1        | -0.19312 | 0.000146 | 0.000519 |
| IGSF22    | 11p15.1        | -0.19312 | 0.000146 | 0.000519 |
| SLC35F5   | 2q14.1         | 0.193055 | 0.000147 | 0.000521 |
| LILRA1    | 19q13.42       | 0.193038 | 0.000147 | 0.000522 |
| UHRF1BP1L | 12q23.1        | 0.193036 | 0.000147 | 0.000522 |
| ARL10     | 5q35.2         | 0.193024 | 0.000147 | 0.000522 |
| ARMC12    | 6p21.31        | -0.19298 | 0.000148 | 0.000524 |
| HEATR6    | 17q23.1        | 0.192953 | 0.000148 | 0.000525 |
| ITGB8     | 7p21.1         | 0.192942 | 0.000148 | 0.000526 |
| NFKBIE    | 6p21.1         | -0.19291 | 0.000148 | 0.000527 |
| BLOC1S3   | 19q13.32       | -0.19291 | 0.000148 | 0.000527 |
| MS4A7     | 11q12.2        | 0.192888 | 0.000149 | 0.000528 |
| CKAP2L    | 2q14.1         | 0.192846 | 0.000149 | 0.000529 |
| ZXDA      | Xp11.21        | 0.192823 | 0.000149 | 0.00053  |
| MKS1      | 17q22          | -0.19282 | 0.000149 | 0.00053  |
| KCNK13    | 14q32.11       | 0.192791 | 0.00015  | 0.000531 |
| CHST12    | 7p22.3         | -0.19278 | 0.00015  | 0.000532 |
| SPNS3     | 17p13.2        | -0.19276 | 0.00015  | 0.000533 |
| LAMB3     | 1q32.2         | 0.192747 | 0.00015  | 0.000533 |
| LYZ       | 12q15          | 0.192726 | 0.000151 | 0.000534 |
| INSL3     | 19p13.11       | 0.192703 | 0.000151 | 0.000535 |
| FRG1      | 4q35.2         | -0.1927  | 0.000151 | 0.000535 |
| FAM216B   | 13q14.11       | 0.192694 | 0.000151 | 0.000535 |
| FAM66A    | 8p23.1         | 0.192692 | 0.000151 | 0.000535 |
| DOCK8-AS1 | 9p24.3         | 0.192681 | 0.000151 | 0.000535 |
| U2AF1L4   | 19q13.12       | -0.19266 | 0.000151 | 0.000536 |
| HECA      | 6q24.1         | 0.192661 | 0.000151 | 0.000536 |
| FCSK      | 16q22.1        | -0.1926  | 0.000152 | 0.000538 |
| NPTX1     | 17q25.3        | 0.192584 | 0.000152 | 0.000539 |
| RPS6KA3   | Xp22.12        | 0.19258  | 0.000152 | 0.000539 |
| GPR85     | 7q31.1         | 0.192578 | 0.000152 | 0.000539 |
| SPDEF     | 6p21.31        | 0.192576 | 0.000152 | 0.000539 |
| VAR52     | 6p21.33        | -0.19257 | 0.000153 | 0.000539 |
| TIGD4     | 4q31.3         | -0.19256 | 0.000153 | 0.00054  |
| PNOC      | 8p21.1         | 0.192551 | 0.000153 | 0.00054  |
| RBM17     | 10p15.1        | -0.19255 | 0.000153 | 0.00054  |
| CDC20     | 1p34.2         | -0.19252 | 0.000153 | 0.000541 |
| FAM92A    | 8q22.1         | -0.19246 | 0.000154 | 0.000544 |
| SLC25A29  | 14q32.2        | -0.19245 | 0.000154 | 0.000544 |
| F7        | 13q34          | -0.19244 | 0.000154 | 0.000544 |
| AGPAT2    | 9q34.3         | -0.19241 | 0.000155 | 0.000546 |
| NCOA7     | 6q22.31-q22.32 | 0.192391 | 0.000155 | 0.000546 |
| EHD3      | 2p23.1         | 0.192384 | 0.000155 | 0.000546 |
| RBMXL1    | 1p22.2         | 0.192356 | 0.000155 | 0.000548 |
| SELENOK   | 3p21.1         | -0.19233 | 0.000155 | 0.000549 |
| FAM83E    | 19q13.33       | 0.192322 | 0.000156 | 0.000549 |
| DBNL      | 7p13           | -0.19231 | 0.000156 | 0.000549 |
| SIRT7     | 17q25.3        | -0.1923  | 0.000156 | 0.00055  |
| HCN3      | 1q22           | -0.19228 | 0.000156 | 0.000551 |
| FBXL7     | 5p15.1         | 0.192261 | 0.000156 | 0.000551 |

|            |                 |          |          |          |
|------------|-----------------|----------|----------|----------|
| CFAP410    | 21q22.3         | -0.19225 | 0.000157 | 0.000552 |
| BUD13      | 11q23.3         | -0.19224 | 0.000157 | 0.000552 |
| SHLD2P3    | 10q11.22        | 0.192169 | 0.000158 | 0.000555 |
| HDAC9      | 7p21.1          | 0.192139 | 0.000158 | 0.000556 |
| DRP2       | Xq22.1          | 0.192134 | 0.000158 | 0.000556 |
| ANGPTL1    | 1q25.2          | 0.192085 | 0.000159 | 0.000559 |
| FDXR       | 17q25.1         | -0.19206 | 0.000159 | 0.00056  |
| PRRX1      | 1q24.2          | 0.192052 | 0.000159 | 0.00056  |
| RAB33B     | 4q31.1          | 0.192043 | 0.000159 | 0.00056  |
| RTN4IP1    | 6q21            | -0.19202 | 0.000159 | 0.000561 |
| MRC1       | 10p12.33        | 0.192022 | 0.000159 | 0.000561 |
| LTBR       | 12p13.31        | -0.19202 | 0.000159 | 0.000561 |
| ZNF182     | Xp11.23         | -0.19202 | 0.000159 | 0.000561 |
| MAP3K3     | 17q23.3         | 0.19201  | 0.00016  | 0.000561 |
| TESPA1     | 12q13.2         | 0.192008 | 0.00016  | 0.000561 |
| TENM2      | 5q34            | 0.191997 | 0.00016  | 0.000562 |
| IL1A       | 2q14.1          | 0.191995 | 0.00016  | 0.000562 |
| FAM86C2P   | 11q13.2         | -0.19199 | 0.00016  | 0.000562 |
| TCL6       | 14q32.13        | 0.191951 | 0.00016  | 0.000563 |
| TTC3       | 21q22.13        | 0.19192  | 0.000161 | 0.000564 |
| ZSWIM5     | 1p34.1          | 0.19192  | 0.000161 | 0.000564 |
| EIF4A3     | 17q25.3         | -0.19192 | 0.000161 | 0.000565 |
| GREM1      | 15q13.3         | 0.191885 | 0.000161 | 0.000566 |
| RDH16      | 12q13.3         | -0.19188 | 0.000161 | 0.000566 |
| PCSK5      | 9q21.13         | 0.191884 | 0.000161 | 0.000566 |
| NDE1       | 16p13.11        | 0.191884 | 0.000161 | 0.000566 |
| SLC28A3    | 9q21.32-q21.33  | 0.191881 | 0.000161 | 0.000566 |
| DGLUCY     | 14q32.11        | 0.191841 | 0.000162 | 0.000567 |
| PNLIPRP2   | 10q25.3         | -0.19182 | 0.000162 | 0.000568 |
| EMILIN2    | 18p11.32-p11.31 | 0.191807 | 0.000162 | 0.000569 |
| GTF2IRD1P1 | 7q11.21         | -0.1918  | 0.000162 | 0.000569 |
| AP1M2      | 19p13.2         | -0.19179 | 0.000162 | 0.000569 |
| NAPB       | 20p11.21        | -0.19179 | 0.000162 | 0.000569 |
| ZNF720     | 16p11.2         | 0.191785 | 0.000162 | 0.000569 |
| HIST1H1E   | 6p22.2          | -0.19177 | 0.000163 | 0.00057  |
| GFI1       | 1p22.1          | 0.191767 | 0.000163 | 0.00057  |
| ERP27      | 12p12.3         | -0.19163 | 0.000164 | 0.000576 |
| EED        | 11q14.2         | -0.19161 | 0.000165 | 0.000577 |
| EDA2R      | Xq12            | 0.191601 | 0.000165 | 0.000577 |
| MTHFD1L    | 6q25.1          | -0.1916  | 0.000165 | 0.000577 |
| SULT1C4    | 2q12.3          | 0.191535 | 0.000166 | 0.00058  |
| CCR7       | 17q21.2         | 0.191528 | 0.000166 | 0.00058  |
| TNFSF12    | 17p13.1         | 0.191517 | 0.000166 | 0.000581 |
| APBA1      | 9q21.12         | 0.1915   | 0.000166 | 0.000581 |
| PHLPP2     | 16q22.2         | 0.191497 | 0.000166 | 0.000582 |
| AKT2       | 19q13.2         | -0.19147 | 0.000167 | 0.000583 |
| AAK1       | 2p13.3          | 0.191443 | 0.000167 | 0.000584 |
| TMEM119    | 12q23.3         | 0.191441 | 0.000167 | 0.000584 |
| LENG8      | 19q13.42        | -0.19142 | 0.000167 | 0.000584 |
| BVES       | 6q21            | 0.191423 | 0.000167 | 0.000584 |
| CMC1       | 3p24.1          | -0.19142 | 0.000167 | 0.000584 |
| XPNPEP2    | Xq26.1          | -0.1914  | 0.000168 | 0.000585 |
| NKD1       | 16q12.1         | -0.19134 | 0.000168 | 0.000588 |
| PCDH1      | 5q31.3          | 0.191323 | 0.000169 | 0.000589 |
| PALMD      | 1p21.2          | 0.191315 | 0.000169 | 0.000589 |
| ABO        | 9q34.2          | 0.191296 | 0.000169 | 0.00059  |
| JADE2      | 5q31.1          | 0.191284 | 0.000169 | 0.00059  |
| MINDY4     | 7p14.3          | -0.19123 | 0.00017  | 0.000593 |

|           |          |          |          |          |
|-----------|----------|----------|----------|----------|
| NUDT16    | 3q22.1   | 0.19122  | 0.00017  | 0.000593 |
| TESK1     | 9p13.3   | -0.19122 | 0.00017  | 0.000593 |
| IL15RA    | 10p15.1  | -0.19111 | 0.000172 | 0.000598 |
| MOGAT2    | 11q13.5  | 0.191099 | 0.000172 | 0.000599 |
| TRPM2     | 21q22.3  | -0.19109 | 0.000172 | 0.000599 |
| FERMT2    | 14q22.1  | 0.191023 | 0.000173 | 0.000602 |
| CALML4    | 15q23    | 0.191015 | 0.000173 | 0.000602 |
| PKNOX2    | 11q24.2  | 0.191014 | 0.000173 | 0.000602 |
| STX11     | 6q24.2   | 0.190998 | 0.000173 | 0.000603 |
| SRSF9     | 12q24.31 | -0.19096 | 0.000174 | 0.000605 |
| CARMIL1   | 6p22.2   | 0.190931 | 0.000174 | 0.000606 |
| ADAMTS18  | 16q23.1  | 0.190915 | 0.000174 | 0.000607 |
| XYLT2     | 17q21.33 | -0.19091 | 0.000174 | 0.000607 |
| PFKFB3    | 10p15.1  | 0.1909   | 0.000174 | 0.000607 |
| TLX1      | 10q24.31 | -0.19088 | 0.000175 | 0.000608 |
| LINC00893 | Xq28     | -0.19087 | 0.000175 | 0.000608 |
| EI24      | 11q24.2  | -0.19082 | 0.000176 | 0.000611 |
| KIAA0100  | 17q11.2  | 0.190804 | 0.000176 | 0.000611 |
| PLTP      | 20q13.12 | -0.19079 | 0.000176 | 0.000612 |
| CEP250    | 20q11.22 | -0.19077 | 0.000176 | 0.000613 |
| CXCR3     | Xq13.1   | -0.19075 | 0.000176 | 0.000614 |
| ADA2      | 22q11.1  | 0.190748 | 0.000177 | 0.000614 |
| MYLPF     | 16p11.2  | -0.19068 | 0.000178 | 0.000617 |
| C5ORF15   | 5q31.1   | 0.190613 | 0.000178 | 0.00062  |
| FGF2      | 4q28.1   | 0.19058  | 0.000179 | 0.000622 |
| MPZL2     | 11q23.3  | 0.190577 | 0.000179 | 0.000622 |
| TRPV1     | 17p13.2  | -0.19051 | 0.00018  | 0.000625 |
| SPCS2P4   | 1p35.3   | -0.1905  | 0.00018  | 0.000625 |
| FIBIN     | 11p14.2  | 0.19049  | 0.00018  | 0.000626 |
| NDUFV3    | 21q22.3  | -0.19041 | 0.000181 | 0.00063  |
| DISP1     | 1q41     | 0.190408 | 0.000181 | 0.00063  |
| PGAM5     | 12q24.33 | -0.19038 | 0.000182 | 0.000631 |
| TOLLIP    | 11p15.5  | -0.19037 | 0.000182 | 0.000631 |
| NANOS3    | 19p13.12 | -0.19035 | 0.000182 | 0.000632 |
| GRIK3     | 1p34.3   | 0.190353 | 0.000182 | 0.000632 |
| BOC       | 3q13.2   | 0.19035  | 0.000182 | 0.000632 |
| C10ORF82  | 10q25.3  | -0.19034 | 0.000182 | 0.000632 |
| SLC38A5   | Xp11.23  | -0.19032 | 0.000183 | 0.000633 |
| C5AR1     | 19q13.32 | 0.190291 | 0.000183 | 0.000635 |
| TNFRSF10A | 8p21.3   | 0.190283 | 0.000183 | 0.000635 |
| TRAT1     | 3q13.13  | 0.19024  | 0.000184 | 0.000637 |
| SH3BP5L   | 1q44     | 0.190207 | 0.000184 | 0.000639 |
| ZNF577    | 19q13.41 | -0.1902  | 0.000184 | 0.000639 |
| SNORA71A  | 20q11.23 | -0.1902  | 0.000184 | 0.000639 |
| PDCD1LG2  | 9p24.1   | 0.19017  | 0.000185 | 0.00064  |
| PDIA3     | 15q15.3  | 0.190163 | 0.000185 | 0.00064  |
| DZIP1     | 13q32.1  | 0.190145 | 0.000185 | 0.000641 |
| IL17REL   | 22q13.33 | 0.190102 | 0.000186 | 0.000643 |
| GMEB1     | 1p35.3   | 0.190085 | 0.000186 | 0.000644 |
| NOP2      | 12p13.31 | -0.19002 | 0.000187 | 0.000648 |
| MSH3      | 5q14.1   | 0.189995 | 0.000187 | 0.000648 |
| FAM106C   | 17p11.2  | 0.189992 | 0.000188 | 0.000648 |
| HUWE1     | Xp11.22  | 0.189979 | 0.000188 | 0.000649 |
| TGFA      | 2p13.3   | 0.189979 | 0.000188 | 0.000649 |
| FGF3      | 11q13.3  | -0.18993 | 0.000188 | 0.000651 |
| RHOA      | 3p21.31  | 0.189879 | 0.000189 | 0.000654 |
| SLC9A1    | 1p36.11  | 0.189786 | 0.000191 | 0.000659 |
| RMND1     | 6q25.1   | -0.18977 | 0.000191 | 0.00066  |

|            |          |          |          |          |
|------------|----------|----------|----------|----------|
| SFT2D3     | 2q14.3   | -0.18974 | 0.000191 | 0.000661 |
| ETNK2      | 1q32.1   | -0.18972 | 0.000192 | 0.000662 |
| FLYWCH1    | 16p13.3  | -0.1897  | 0.000192 | 0.000662 |
| ABRAXAS2   | 10q26.13 | 0.189692 | 0.000192 | 0.000663 |
| GPR152     | 11q13.2  | 0.189692 | 0.000192 | 0.000663 |
| TTC4       | 1p32.3   | -0.18967 | 0.000192 | 0.000664 |
| CD86       | 3q13.33  | 0.189673 | 0.000192 | 0.000664 |
| NACC2      | 9q34.3   | 0.189578 | 0.000194 | 0.000669 |
| TNR        | 1q25.1   | 0.189531 | 0.000195 | 0.000671 |
| AMPD2      | 1p13.3   | -0.18952 | 0.000195 | 0.000671 |
| WBP1L      | 10q24.32 | 0.189492 | 0.000195 | 0.000673 |
| GLRB       | 4q32.1   | 0.189452 | 0.000196 | 0.000675 |
| GPR142     | 17q25.1  | 0.189452 | 0.000196 | 0.000675 |
| RAB19      | 7q34     | 0.189437 | 0.000196 | 0.000675 |
| ORAI1      | 12q24.31 | -0.1894  | 0.000196 | 0.000677 |
| BCAT1      | 12p12.1  | 0.189389 | 0.000197 | 0.000678 |
| THOC3      | 5q35.2   | -0.18938 | 0.000197 | 0.000678 |
| LGMIN      | 14q32.12 | 0.189372 | 0.000197 | 0.000678 |
| PDPK1      | 16p13.3  | 0.189339 | 0.000198 | 0.00068  |
| MGC12916   | 17p12    | 0.189262 | 0.000199 | 0.000684 |
| CLEC10A    | 17p13.1  | 0.189197 | 0.0002   | 0.000688 |
| SMPD3      | 16q22.1  | 0.189137 | 0.000201 | 0.000691 |
| RANGAP1    | 22q13.2  | -0.18912 | 0.000201 | 0.000691 |
| SUB1       | 5p13.3   | -0.1891  | 0.000201 | 0.000693 |
| WSCD1      | 17p13.2  | 0.189077 | 0.000202 | 0.000694 |
| NAA40      | 11q13.1  | -0.18905 | 0.000202 | 0.000695 |
| PIH1D1     | 19q13.33 | -0.18904 | 0.000202 | 0.000695 |
| ARHGAP19   | 10q24.1  | 0.189039 | 0.000202 | 0.000695 |
| KDF1       | 1p36.11  | -0.18899 | 0.000203 | 0.000698 |
| MYC        | 8q24.21  | -0.18898 | 0.000203 | 0.000698 |
| ST6GALNAC4 | 9q34.11  | -0.18897 | 0.000203 | 0.000699 |
| GAL3ST4    | 7q22.1   | 0.188958 | 0.000204 | 0.000699 |
| EIF2AK2    | 2p22.2   | 0.188905 | 0.000204 | 0.000702 |
| NPEPPS     | 17q21.32 | 0.188878 | 0.000205 | 0.000704 |
| AVPR2      | Xq28     | 0.188871 | 0.000205 | 0.000704 |
| FBXW2      | 9q33.2   | 0.188846 | 0.000205 | 0.000705 |
| BEND6      | 6p12.1   | 0.188811 | 0.000206 | 0.000707 |
| CD300C     | 17q25.1  | 0.188808 | 0.000206 | 0.000707 |
| LAPTM5     | 1p35.2   | 0.188751 | 0.000207 | 0.00071  |
| LRRC58     | 3q13.33  | 0.188749 | 0.000207 | 0.00071  |
| RDH14      | 2p24.2   | -0.18875 | 0.000207 | 0.00071  |
| FBXO11     | 2p16.3   | 0.188727 | 0.000207 | 0.000711 |
| ZNF536     | 19q12    | 0.188712 | 0.000208 | 0.000712 |
| CES3       | 16q22.1  | 0.188704 | 0.000208 | 0.000712 |
| DET1       | 15q26.1  | 0.188675 | 0.000208 | 0.000714 |
| WDR48      | 3p22.2   | 0.188665 | 0.000208 | 0.000714 |
| PNMA8A     | 19q13.32 | 0.188647 | 0.000209 | 0.000715 |
| PPIL1      | 6p21.2   | -0.18862 | 0.000209 | 0.000716 |
| B4GALT2    | 1p34.1   | -0.18861 | 0.000209 | 0.000717 |
| SMYD4      | 17p13.3  | 0.188603 | 0.000209 | 0.000717 |
| KDM3A      | 2p11.2   | 0.188597 | 0.000209 | 0.000717 |
| AFG3L2     | 18p11.21 | 0.188568 | 0.00021  | 0.000719 |
| JPX        | Xq13.2   | -0.18855 | 0.00021  | 0.00072  |
| GBX2       | 2q37.2   | -0.18854 | 0.00021  | 0.00072  |
| RAC2       | 22q13.1  | 0.188518 | 0.000211 | 0.000721 |
| CYP1B1-AS1 | 2p22.2   | 0.188492 | 0.000211 | 0.000723 |
| TUBG2      | 17q21.2  | -0.18847 | 0.000212 | 0.000724 |
| FAM183A    | 1p34.2   | -0.18847 | 0.000212 | 0.000724 |



|             |              |          |          |          |
|-------------|--------------|----------|----------|----------|
| PTGFR       | 1p31.1       | 0.188431 | 0.000212 | 0.000726 |
| H2AFV       | 7p13         | -0.1884  | 0.000213 | 0.000728 |
| REPIN1      | 7q36.1       | -0.18836 | 0.000213 | 0.00073  |
| CXADR       | 21q21.1      | 0.188347 | 0.000214 | 0.00073  |
| ABCC9       | 12p12.1      | 0.188346 | 0.000214 | 0.00073  |
| SNPH        | 20p13        | 0.188332 | 0.000214 | 0.000731 |
| ERRFI1      | 1p36.23      | 0.188285 | 0.000215 | 0.000733 |
| MGC16275    | 17q25.1      | -0.18827 | 0.000215 | 0.000734 |
| XIAP        | Xq25         | 0.188234 | 0.000216 | 0.000736 |
| COG2        | 1q42.2       | 0.188224 | 0.000216 | 0.000737 |
| B4GALNT2    | 17q21.32     | 0.188215 | 0.000216 | 0.000737 |
| CMTM1       | 16q21        | 0.188188 | 0.000216 | 0.000738 |
| TP53INP2    | 20q11.22     | 0.188181 | 0.000216 | 0.000739 |
| COL3A1      | 2q32.2       | 0.188169 | 0.000217 | 0.000739 |
| ST20-AS1    | 15q25.1      | 0.188124 | 0.000217 | 0.000742 |
| PKD2        | 4q22.1       | 0.188116 | 0.000218 | 0.000742 |
| FUNDC2P2    | 2p11.2       | -0.18811 | 0.000218 | 0.000743 |
| KDM2A       | 11q13.2      | 0.188093 | 0.000218 | 0.000743 |
| AGR3        | 7p21.1       | 0.188078 | 0.000218 | 0.000744 |
| CREB3L1     | 11p11.2      | 0.188077 | 0.000218 | 0.000744 |
| RASAL1      | 12q24.13     | 0.188063 | 0.000218 | 0.000745 |
| PCED1B-AS1  | 12q13.11     | 0.188045 | 0.000219 | 0.000745 |
| PLCG1       | 20q12        | -0.18801 | 0.000219 | 0.000748 |
| TGFB2       | 1q41         | 0.188005 | 0.000219 | 0.000748 |
| CHRM3       | 1q43         | 0.187991 | 0.00022  | 0.000748 |
| POFUT1      | 20q11.21     | -0.18796 | 0.00022  | 0.00075  |
| COPG1       | 3q21.3       | 0.187961 | 0.00022  | 0.00075  |
| FLJ37453    | 1p36.21      | -0.18794 | 0.000221 | 0.000751 |
| VWA2        | 10q25.3      | 0.187915 | 0.000221 | 0.000752 |
| TMEM26      | 10q21.2      | 0.187861 | 0.000222 | 0.000755 |
| LOC93622    | 4p16.1       | -0.18784 | 0.000222 | 0.000757 |
| FCGR2B      | 1q23.3       | 0.187834 | 0.000222 | 0.000757 |
| FSTL1       | 3q13.33      | 0.187817 | 0.000223 | 0.000758 |
| C17ORF107   | 17p13.2      | 0.187785 | 0.000223 | 0.000759 |
| ZNF558      | 19p13.2      | -0.18778 | 0.000223 | 0.000759 |
| MFSD10      | 4p16.3       | -0.18777 | 0.000224 | 0.00076  |
| U2AF2       | 19q13.42     | -0.18774 | 0.000224 | 0.000762 |
| SLC25A5-AS1 | Xq24         | -0.18772 | 0.000224 | 0.000763 |
| SUZ12       | 17q11.2      | 0.187684 | 0.000225 | 0.000765 |
| PEX5        | 12p13.31     | -0.18761 | 0.000226 | 0.000769 |
| SMARCA1     | Xq25-q26.1   | 0.187595 | 0.000227 | 0.00077  |
| SLX1B       | 16p11.2      | -0.18756 | 0.000227 | 0.000772 |
| CDK18       | 1q32.1       | -0.18752 | 0.000228 | 0.000774 |
| CDX1        | 5q32         | -0.18748 | 0.000229 | 0.000777 |
| FBXO32      | 8q24.13      | 0.187464 | 0.000229 | 0.000777 |
| SNORD15B    | 11q13.4      | -0.18744 | 0.00023  | 0.000779 |
| FXR2        | 17p13.1      | 0.187407 | 0.00023  | 0.000781 |
| ZNF787      | 19q13.43     | -0.18741 | 0.00023  | 0.000781 |
| FAM107A     | 3p14.3-p14.2 | 0.187386 | 0.00023  | 0.000782 |
| GPN1        | 2p23.3       | -0.18738 | 0.00023  | 0.000782 |
| ACSF2       | 17q21.33     | -0.18734 | 0.000231 | 0.000784 |
| LINC00999   | 10p11.1      | -0.1873  | 0.000232 | 0.000786 |
| MED22       | 9q34.2       | -0.18729 | 0.000232 | 0.000787 |
| CD177       | 19q13.31     | 0.187276 | 0.000232 | 0.000788 |
| GPRASP2     | Xq22.1       | 0.187255 | 0.000233 | 0.000789 |
| ERMP1       | 9p24.1       | 0.18725  | 0.000233 | 0.000789 |
| CCR5        | 3p21.31      | 0.187236 | 0.000233 | 0.00079  |
| LILRB4      | 19q13.42     | 0.18721  | 0.000234 | 0.000791 |

|             |              |          |          |          |
|-------------|--------------|----------|----------|----------|
| HMGB1P1     | 20q13.31     | -0.18718 | 0.000234 | 0.000793 |
| MYO18A      | 17q11.2      | 0.187155 | 0.000235 | 0.000794 |
| RNF19B      | 1p35.1       | 0.187152 | 0.000235 | 0.000794 |
| PACRGL      | 4p15.31      | -0.18714 | 0.000235 | 0.000795 |
| CYBA        | 16q24.2      | -0.18711 | 0.000235 | 0.000797 |
| AKR1C1      | 10p15.1      | -0.18708 | 0.000236 | 0.000798 |
| PWWP2A      | 5q33.3       | 0.187079 | 0.000236 | 0.000798 |
| CABLES2     | 20q13.33     | -0.18705 | 0.000237 | 0.0008   |
| FBLIM1      | 1p36.21      | 0.18702  | 0.000237 | 0.000802 |
| PLEKHD1     | 14q24.1      | 0.186999 | 0.000238 | 0.000803 |
| MTTP        | 4q23         | -0.18699 | 0.000238 | 0.000804 |
| CYP7B1      | 8q12.3       | 0.186965 | 0.000238 | 0.000805 |
| RHOU        | 1q42.13      | 0.186941 | 0.000239 | 0.000806 |
| ZNF354B     | 5q35.3       | -0.18692 | 0.000239 | 0.000808 |
| ID1         | 20q11.21     | -0.1869  | 0.000239 | 0.000809 |
| SPA17       | 11q24.2      | -0.18689 | 0.00024  | 0.000809 |
| CTDP1       | 18q23        | 0.186871 | 0.00024  | 0.00081  |
| SAP30L      | 5q33.2       | 0.18684  | 0.000241 | 0.000812 |
| C11ORF68    | 11q13.1      | -0.18681 | 0.000241 | 0.000814 |
| PHF12       | 17q11.2      | 0.186807 | 0.000241 | 0.000814 |
| ISCU        | 12q23.3      | -0.18678 | 0.000242 | 0.000816 |
| ZNF444      | 19q13.43     | -0.18676 | 0.000242 | 0.000816 |
| FOXP3       | Xp11.23      | 0.186708 | 0.000243 | 0.00082  |
| C3ORF35     | 3p22.2       | -0.18669 | 0.000243 | 0.000821 |
| RBM11       | 21q11.2      | -0.18667 | 0.000244 | 0.000822 |
| SLAMF7      | 1q23.3       | 0.186612 | 0.000245 | 0.000826 |
| DIMT1       | 5q12.1       | -0.1866  | 0.000245 | 0.000826 |
| BBOF1       | 14q24.3      | 0.186576 | 0.000246 | 0.000828 |
| PTP4A1      | 6q12         | 0.186523 | 0.000247 | 0.000831 |
| EPB41L4A-DT | 5q22.2       | 0.186503 | 0.000247 | 0.000832 |
| COL9A3      | 20q13.33     | -0.18649 | 0.000247 | 0.000833 |
| CDH13       | 16q23.3      | 0.18647  | 0.000248 | 0.000834 |
| EREG        | 4q13.3       | -0.18642 | 0.000249 | 0.000837 |
| SLC25A47    | 14q32.2      | -0.18641 | 0.000249 | 0.000838 |
| DLST        | 14q24.3      | 0.186402 | 0.000249 | 0.000838 |
| NOL4        | 18q12.1      | 0.186368 | 0.00025  | 0.00084  |
| HYI         | 1p34.2       | -0.18631 | 0.000251 | 0.000844 |
| EFNA1       | 1q22         | -0.1863  | 0.000251 | 0.000844 |
| MEIG1       | 10p13        | -0.18629 | 0.000251 | 0.000844 |
| C3          | 19p13.3      | 0.18629  | 0.000251 | 0.000845 |
| TSNAX       | 1q42.2       | 0.186268 | 0.000251 | 0.000846 |
| ARTN        | 1p34.1       | -0.18626 | 0.000252 | 0.000846 |
| RABGAP1     | 9q33.2-q33.3 | 0.186248 | 0.000252 | 0.000847 |
| MAN1A1      | 6q22.31      | 0.186232 | 0.000252 | 0.000848 |
| STMN2       | 8q21.13      | 0.186229 | 0.000252 | 0.000848 |
| MUC7        | 4q13.3       | 0.186226 | 0.000252 | 0.000848 |
| PCDHB7      | 5q31.3       | 0.186221 | 0.000252 | 0.000848 |
| HPSE2       | 10q24.2      | 0.186213 | 0.000253 | 0.000849 |
| BCL2L11     | 2q13         | 0.186205 | 0.000253 | 0.000849 |
| COL4A1      | 13q34        | 0.186199 | 0.000253 | 0.000849 |
| GZMB        | 14q12        | -0.18617 | 0.000253 | 0.000851 |
| MRC2        | 17q23.2      | 0.186147 | 0.000254 | 0.000852 |
| DENND4C     | 9p22.1       | 0.186127 | 0.000254 | 0.000854 |
| RAB1B       | 11q13.2      | -0.18607 | 0.000255 | 0.000857 |
| NIN         | 14q22.1      | 0.186069 | 0.000255 | 0.000857 |
| ELMOD2      | 4q31.1       | 0.186065 | 0.000256 | 0.000857 |
| CHSY3       | 5q23.3       | 0.186022 | 0.000256 | 0.00086  |
| MEAF6       | 1p34.3       | -0.18595 | 0.000258 | 0.000865 |

|           |          |          |          |          |
|-----------|----------|----------|----------|----------|
| LINC02035 | 3q21.1   | 0.185929 | 0.000258 | 0.000866 |
| SGSM1     | 22q11.23 | 0.185917 | 0.000258 | 0.000867 |
| ABCD2     | 12q12    | 0.185878 | 0.000259 | 0.000869 |
| LPO       | 17q22    | -0.18586 | 0.00026  | 0.00087  |
| GLOD5     | Xp11.23  | -0.18585 | 0.00026  | 0.00087  |
| GREM2     | 1q43     | 0.185845 | 0.00026  | 0.000871 |
| EPHA1     | 7q34-q35 | -0.18584 | 0.00026  | 0.000871 |
| PCNX2     | 1q42.2   | 0.185797 | 0.000261 | 0.000874 |
| FCGR2A    | 1q23.3   | 0.185695 | 0.000263 | 0.000881 |
| SUCLG1    | 2p11.2   | -0.18568 | 0.000263 | 0.000882 |
| TTLL2     | 6q27     | -0.18568 | 0.000263 | 0.000882 |
| VASH1     | 14q24.3  | 0.185643 | 0.000264 | 0.000884 |
| ARX       | Xp21.3   | 0.18559  | 0.000265 | 0.000887 |
| KIAA0355  | 19q13.11 | 0.18559  | 0.000265 | 0.000887 |
| SLC1A5    | 19q13.32 | -0.18558 | 0.000265 | 0.000887 |
| PHACTR4   | 1p35.3   | 0.185577 | 0.000265 | 0.000888 |
| USP40     | 2q37.1   | -0.18556 | 0.000266 | 0.000889 |
| GJB6      | 13q12.11 | 0.185493 | 0.000267 | 0.000893 |
| HAGHL     | 16p13.3  | -0.18545 | 0.000268 | 0.000896 |
| GAB3      | Xq28     | 0.185449 | 0.000268 | 0.000896 |
| BIVM      | 13q33.1  | -0.18544 | 0.000268 | 0.000897 |
| DLL3      | 19q13.2  | -0.18542 | 0.000269 | 0.000898 |
| SLAMF8    | 1q23.2   | 0.185387 | 0.000269 | 0.0009   |
| LIPA      | 10q23.31 | 0.185384 | 0.000269 | 0.0009   |
| SH3RF3    | 2q13     | 0.185361 | 0.00027  | 0.000902 |
| HMCES     | 3q21.3   | -0.18536 | 0.00027  | 0.000902 |
| FANCA     | 16q24.3  | -0.18531 | 0.000271 | 0.000904 |
| UBAP2L    | 1q21.3   | 0.185313 | 0.000271 | 0.000904 |
| SNRNP35   | 12q24.31 | -0.18529 | 0.000271 | 0.000906 |
| ERH       | 14q24.1  | -0.18526 | 0.000272 | 0.000908 |
| FCGR2C    | 1q23.3   | 0.185229 | 0.000273 | 0.00091  |
| ARF4      | 3p14.3   | 0.185171 | 0.000274 | 0.000914 |
| PAPPA     | 9q33.1   | 0.185157 | 0.000274 | 0.000915 |
| TMEM229B  | 14q24.1  | 0.18512  | 0.000275 | 0.000917 |
| PLXNB1    | 3p21.31  | -0.18511 | 0.000275 | 0.000918 |
| TREML4    | 6p21.1   | 0.185093 | 0.000276 | 0.000919 |
| TSC22D4   | 7q22.1   | -0.18506 | 0.000276 | 0.000921 |
| ZNF16     | 8q24.3   | -0.18505 | 0.000276 | 0.000921 |
| FOLR2     | 11q13.4  | 0.185044 | 0.000277 | 0.000922 |
| FITM1     | 14q12    | -0.18504 | 0.000277 | 0.000922 |
| EIF3E     | 8q23.1   | -0.18504 | 0.000277 | 0.000922 |
| WDR81     | 17p13.3  | 0.185023 | 0.000277 | 0.000923 |
| HIST1H3G  | 6p22.2   | -0.18502 | 0.000277 | 0.000923 |
| ZFAND1    | 8q21.13  | -0.18501 | 0.000277 | 0.000923 |
| P4HA1     | 10q22.1  | 0.185002 | 0.000278 | 0.000924 |
| MIER3     | 5q11.2   | 0.184999 | 0.000278 | 0.000924 |
| COL19A1   | 6q13     | 0.184998 | 0.000278 | 0.000924 |
| TSPAN11   | 12p11.21 | 0.184902 | 0.00028  | 0.000931 |
| TNFSF10   | 3q26.31  | 0.184878 | 0.00028  | 0.000932 |
| NADSYN1   | 11q13.4  | -0.18487 | 0.00028  | 0.000933 |
| SMTNL2    | 17p13.2  | -0.18486 | 0.000281 | 0.000933 |
| LOXL2     | 8p21.3   | 0.184818 | 0.000282 | 0.000936 |
| DPYSL2    | 8p21.2   | 0.184774 | 0.000282 | 0.000939 |
| LINC00552 | 13q34    | -0.18476 | 0.000283 | 0.00094  |
| DKK3      | 11p15.3  | 0.184758 | 0.000283 | 0.00094  |
| ING4      | 12p13.31 | -0.18474 | 0.000283 | 0.000941 |
| MRPL54    | 19p13.3  | -0.18473 | 0.000283 | 0.000941 |
| CNOT2     | 12q15    | 0.184666 | 0.000285 | 0.000946 |

|           |              |          |          |          |
|-----------|--------------|----------|----------|----------|
| NSUN6     | 10p12.31     | -0.18467 | 0.000285 | 0.000946 |
| ZNF576    | 19q13.31     | -0.18464 | 0.000285 | 0.000948 |
| PDSS1     | 10p12.1      | -0.18458 | 0.000287 | 0.000952 |
| C20ORF197 | 20q13.33     | 0.184555 | 0.000287 | 0.000954 |
| FOXO1     | 13q14.11     | 0.184548 | 0.000287 | 0.000954 |
| RGL3      | 19p13.2      | 0.184548 | 0.000287 | 0.000954 |
| LINC01144 | 1p34.1       | -0.18454 | 0.000288 | 0.000954 |
| MRPS30    | 5p12         | -0.1845  | 0.000289 | 0.000957 |
| SPPL2B    | 19p13.3      | -0.1845  | 0.000289 | 0.000957 |
| PEAR1     | 1q23.1       | 0.184471 | 0.000289 | 0.000959 |
| PAK3      | Xq23         | 0.184466 | 0.000289 | 0.000959 |
| TCN2      | 22q12.2      | 0.184443 | 0.00029  | 0.000961 |
| UNC13B    | 9p13.3       | 0.184431 | 0.00029  | 0.000961 |
| IL17RB    | 3p21.1       | -0.18443 | 0.00029  | 0.000961 |
| SNORA52   | 11p15.5      | -0.18442 | 0.00029  | 0.000962 |
| KDELR3    | 22q13.1      | 0.184406 | 0.000291 | 0.000963 |
| BBC3      | 19q13.32     | -0.18438 | 0.000291 | 0.000965 |
| HEPH      | Xq12         | 0.184366 | 0.000292 | 0.000966 |
| NDUFA10   | 2q37.3       | -0.18433 | 0.000292 | 0.000968 |
| DNAJC12   | 10q21.3      | 0.18431  | 0.000293 | 0.000969 |
| ARL4C     | 2q37.1       | 0.184307 | 0.000293 | 0.00097  |
| NEFM      | 8p21.2       | 0.184292 | 0.000293 | 0.000971 |
| CACNB4    | 2q23.3       | 0.184283 | 0.000293 | 0.000971 |
| SYTL5     | Xp11.4       | 0.184279 | 0.000294 | 0.000971 |
| DCBLD2    | 3q12.1 3     | 0.184277 | 0.000294 | 0.000971 |
| CD36      | 7q21.11      | 0.184273 | 0.000294 | 0.000971 |
| CSRNP3    | 2q24.3       | 0.184265 | 0.000294 | 0.000972 |
| EVA1A     | 2p12         | -0.18425 | 0.000294 | 0.000973 |
| SERPINA3  | 14q32.13     | 0.184235 | 0.000295 | 0.000974 |
| KNOP1     | 16p12.3      | -0.18422 | 0.000295 | 0.000975 |
| WDCP      | 2p23.3       | -0.18422 | 0.000295 | 0.000975 |
| AKNAD1    | 1p13.3       | -0.18421 | 0.000295 | 0.000975 |
| PFKP      | 10p15.2      | 0.184177 | 0.000296 | 0.000977 |
| DHRS4-AS1 | 14q11.2      | 0.184167 | 0.000296 | 0.000978 |
| FGD2      | 6p21.2       | 0.184149 | 0.000296 | 0.000979 |
| NRBF2     | 10q21.3      | 0.184143 | 0.000297 | 0.000979 |
| ADPRH     | 3q13.33      | 0.184142 | 0.000297 | 0.000979 |
| TIMMDC1   | 3q13.33      | -0.18414 | 0.000297 | 0.000979 |
| WNT6      | 2q35         | -0.18414 | 0.000297 | 0.000979 |
| AMZ2P1    | 17q24.1      | -0.18412 | 0.000297 | 0.000981 |
| RELN      | 7q22.1       | 0.184098 | 0.000298 | 0.000982 |
| ELMO1     | 7p14.2-p14.1 | 0.184083 | 0.000298 | 0.000983 |
| WDR5B     | 3q21.1       | -0.18407 | 0.000298 | 0.000984 |
| SEMA4G    | 10q24.31     | 0.18406  | 0.000299 | 0.000984 |
| SNAP29    | 22q11.21     | 0.184057 | 0.000299 | 0.000985 |
| ASXL1     | 20q11.21     | -0.18405 | 0.000299 | 0.000985 |
| LRRC8A    | 9q34.11      | 0.184029 | 0.000299 | 0.000986 |
| ANGPTL2   | 9q33.3       | 0.184029 | 0.000299 | 0.000986 |
| NLRC4     | 2p22.3       | 0.18402  | 0.000299 | 0.000987 |
| NIPAL3    | 1p36.11      | 0.18399  | 0.0003   | 0.000989 |
| ADD2      | 2p13.3       | 0.183973 | 0.000301 | 0.00099  |
| TINF2     | 14q12        | 0.183972 | 0.000301 | 0.00099  |
| MAPK7     | 17p11.2      | 0.183953 | 0.000301 | 0.000991 |
| MEIS3P1   | 17p12        | 0.183929 | 0.000302 | 0.000993 |
| POLR2J3   | 7q22.1       | -0.1839  | 0.000302 | 0.000995 |
| PTTG3P    | 8q13.1       | -0.1839  | 0.000302 | 0.000995 |
| FAM189A1  | 15q13.1      | 0.183886 | 0.000303 | 0.000996 |
| IGBP1     | Xq13.1       | -0.18386 | 0.000303 | 0.000997 |

|            |              |          |          |          |
|------------|--------------|----------|----------|----------|
| ADGRE3     | 19p13.12     | 0.183846 | 0.000304 | 0.000998 |
| CBX5       | 12q13.13     | 0.183839 | 0.000304 | 0.000999 |
| SLC23A2    | 20p13        | 0.183825 | 0.000304 | 0.001    |
| FOXJ3      | 1p34.2       | 0.183818 | 0.000304 | 0.001    |
| IL22RA1    | 1p36.11      | -0.18381 | 0.000304 | 0.001    |
| COLGALT2   | 1q25.3       | 0.183805 | 0.000304 | 0.001001 |
| DAB2IP     | 9q33.2       | 0.183797 | 0.000305 | 0.001001 |
| MSR1       | 8p22         | 0.183737 | 0.000306 | 0.001006 |
| SOCS4      | 14q22.3      | 0.183732 | 0.000306 | 0.001006 |
| INPP1      | 2q32.2       | 0.183724 | 0.000306 | 0.001006 |
| MYD88      | 3p22.2       | 0.18372  | 0.000306 | 0.001006 |
| FILIP1L    | 3q12.1       | 0.183714 | 0.000307 | 0.001007 |
| PRELID3B   | 20q13.32     | -0.18369 | 0.000307 | 0.001008 |
| CSMD1      | 8p23.2       | 0.183682 | 0.000307 | 0.001009 |
| FAM27C     | 9q13         | -0.18363 | 0.000309 | 0.001013 |
| CSTF3      | 11p13        | -0.18362 | 0.000309 | 0.001013 |
| SEMA3C     | 7q21.11      | 0.183606 | 0.000309 | 0.001014 |
| RPA4       | Xq21.33      | -0.18359 | 0.000309 | 0.001015 |
| SALL2      | 14q11.2      | 0.18356  | 0.00031  | 0.001018 |
| NEDD4L     | 18q21.31     | 0.183547 | 0.000311 | 0.001018 |
| CYP8B1     | 3p22.1       | 0.183546 | 0.000311 | 0.001018 |
| SNAPC3     | 9p22.3       | 0.183533 | 0.000311 | 0.001019 |
| LRFN4      | 11q13.2      | -0.18349 | 0.000312 | 0.001023 |
| EXD2       | 14q24.1      | 0.183484 | 0.000312 | 0.001023 |
| CHRM1      | 11q12.3      | 0.183406 | 0.000314 | 0.001029 |
| DNASE2B    | 1p31.1-p22.3 | 0.183396 | 0.000314 | 0.001029 |
| RNF121     | 11q13.4      | -0.18338 | 0.000315 | 0.00103  |
| RBM12B     | 8q22.1       | 0.183292 | 0.000317 | 0.001037 |
| ANKRD10    | 13q34        | -0.18326 | 0.000317 | 0.00104  |
| CLEC18A    | 16q22.1      | -0.18326 | 0.000318 | 0.00104  |
| TTC1       | 5q33.3       | -0.18324 | 0.000318 | 0.001041 |
| IDS        | Xq28         | 0.183234 | 0.000318 | 0.001041 |
| ANKRD55    | 5q11.2       | 0.18323  | 0.000318 | 0.001041 |
| MUC5B      | 11p15.5      | 0.183228 | 0.000318 | 0.001041 |
| CYTH4      | 22q13.1      | 0.183159 | 0.00032  | 0.001047 |
| SNRPD1     | 18q11.2      | -0.18314 | 0.00032  | 0.001048 |
| RAB31      | 18p11.22     | 0.18314  | 0.00032  | 0.001048 |
| PROZ       | 13q34        | -0.18311 | 0.000321 | 0.00105  |
| MICALL2    | 7p22.3       | -0.18309 | 0.000322 | 0.001051 |
| HIST1H4D   | 6p22.2       | -0.18306 | 0.000322 | 0.001054 |
| DSEL       | 18q22.1      | 0.183019 | 0.000323 | 0.001057 |
| FAM117B    | 2q33.2       | 0.182997 | 0.000324 | 0.001059 |
| NDUFB2-AS1 | 7q34         | -0.18294 | 0.000325 | 0.001063 |
| PCMT1      | 6q25.1       | -0.18287 | 0.000327 | 0.001069 |
| GPATCH2L   | 14q24.3      | 0.182815 | 0.000329 | 0.001073 |
| NAB1       | 2q32.2       | 0.182802 | 0.000329 | 0.001074 |
| UBE2N      | 12q22        | -0.1828  | 0.000329 | 0.001074 |
| SERPINB5   | 18q21.33     | 0.182796 | 0.000329 | 0.001074 |
| APCDD1L    | 20q13.32     | 0.182789 | 0.000329 | 0.001074 |
| PCDHGC5    | 5q31.3       | 0.182779 | 0.000329 | 0.001075 |
| CA3        | 8q21.2       | -0.18277 | 0.00033  | 0.001076 |
| TMEM100    | 17q22        | 0.182754 | 0.00033  | 0.001077 |
| GPR88      | 1p21.2       | 0.182753 | 0.00033  | 0.001077 |
| CUL4A      | 13q34        | -0.18274 | 0.00033  | 0.001078 |
| NCF1       | 7q11.23      | 0.18272  | 0.000331 | 0.001079 |
| VKORC1     | 16p11.2      | -0.1827  | 0.000331 | 0.00108  |
| ANKRD13A   | 12q24.11     | 0.182561 | 0.000335 | 0.001092 |
| RGN        | Xp11.3       | -0.18254 | 0.000336 | 0.001094 |

|            |               |          |          |          |
|------------|---------------|----------|----------|----------|
| NROB2      | 1p36.11       | -0.18252 | 0.000336 | 0.001095 |
| CLSPN      | 1p34.3        | 0.182515 | 0.000336 | 0.001095 |
| SPERT      | 13q14.13      | -0.18246 | 0.000338 | 0.001099 |
| ZC4H2      | Xq11.2        | -0.18245 | 0.000338 | 0.001101 |
| TRIB3      | 20p13         | -0.18236 | 0.00034  | 0.001107 |
| KANSL1     | 17q21.31      | 0.18236  | 0.00034  | 0.001108 |
| LPAR6      | 13q14.2       | 0.182337 | 0.000341 | 0.001109 |
| PKHD1L1    | 8q23.1-q23.2  | 0.182307 | 0.000342 | 0.001112 |
| CISH       | 3p21.2        | -0.18229 | 0.000342 | 0.001113 |
| COL1A2     | 7q21.3        | 0.182292 | 0.000342 | 0.001113 |
| RNASEK     | 17p13.1       | -0.18227 | 0.000342 | 0.001114 |
| TSHB       | 1p13.2        | 0.182244 | 0.000343 | 0.001116 |
| LDB3       | 10q23.2       | 0.182227 | 0.000344 | 0.001118 |
| PAXIP1-AS2 | 7q36.2        | 0.182193 | 0.000345 | 0.00112  |
| MARCKS     | 6q21          | 0.182192 | 0.000345 | 0.00112  |
| LOC541473  | 7q11.23       | -0.18219 | 0.000345 | 0.001121 |
| DPEP2      | 16q22.1       | 0.182178 | 0.000345 | 0.001121 |
| INPP5K     | 17p13.3       | 0.182163 | 0.000345 | 0.001122 |
| TTC22      | 1p32.3        | 0.182146 | 0.000346 | 0.001124 |
| ARHGAP8    | 22q13.31      | -0.18213 | 0.000346 | 0.001125 |
| ROPN1B     | 3q21.2        | 0.18206  | 0.000348 | 0.001131 |
| NUDT10     | Xp11.22       | 0.182033 | 0.000349 | 0.001133 |
| SCRIB      | 8q24.3        | -0.18201 | 0.000349 | 0.001134 |
| HRH4       | 18q11.2       | 0.182002 | 0.00035  | 0.001135 |
| ANGPTL7    | 1p36.22       | 0.181955 | 0.000351 | 0.001139 |
| JMJD8      | 16p13.3       | -0.18193 | 0.000351 | 0.001141 |
| ATP6V1E2   | 2p21 2p16-p12 | -0.18191 | 0.000352 | 0.001143 |
| ARHGEF37   | 5q32          | 0.181892 | 0.000353 | 0.001144 |
| BHLHE40    | 3p26.1        | 0.181891 | 0.000353 | 0.001144 |
| FN1        | 2q35          | 0.181879 | 0.000353 | 0.001145 |
| TRIM8      | 10q24.32      | 0.181872 | 0.000353 | 0.001145 |
| DDX21      | 10q22.1       | 0.18187  | 0.000353 | 0.001145 |
| UGT1A8     | 2q37.1        | 0.181864 | 0.000353 | 0.001145 |
| UNC13A     | 19p13.11      | 0.181863 | 0.000353 | 0.001145 |
| MS4A4A     | 11q12.2       | 0.181843 | 0.000354 | 0.001147 |
| FBXO6      | 1p36.22       | -0.18182 | 0.000354 | 0.001149 |
| TCN1       | 11q12.1       | 0.181804 | 0.000355 | 0.00115  |
| PCDHB5     | 5q31.3        | 0.181786 | 0.000355 | 0.001151 |
| SLAMF1     | 1q23.3        | 0.181783 | 0.000356 | 0.001151 |
| OVGP1      | 1p13.2        | -0.18176 | 0.000356 | 0.001153 |
| AMPH       | 7p14.1        | 0.181754 | 0.000356 | 0.001153 |
| PAPPA2     | 1q25.2        | 0.181754 | 0.000356 | 0.001153 |
| TPO        | 2p25.3        | 0.181744 | 0.000357 | 0.001154 |
| BMPR1A     | 10q23.2       | 0.181738 | 0.000357 | 0.001154 |
| TRNAU1AP   | 1p35.3        | -0.18172 | 0.000357 | 0.001156 |
| TNC        | 9q33.1        | 0.181708 | 0.000358 | 0.001157 |
| DDX11L2    | 2q14.1        | -0.18168 | 0.000358 | 0.001159 |
| ABCB10     | 1q42.13       | 0.181676 | 0.000358 | 0.001159 |
| DHX36      | 3q25.2        | 0.181648 | 0.000359 | 0.001161 |
| STAM       | 10p12.33      | 0.181608 | 0.00036  | 0.001165 |
| GSR        | 8p12          | 0.181603 | 0.00036  | 0.001165 |
| C3P1       | 19p13.2       | -0.1816  | 0.00036  | 0.001165 |
| ABCB11     | 2q31.1        | 0.181587 | 0.000361 | 0.001166 |
| DLEU2      | 13q14.2       | -0.18157 | 0.000361 | 0.001167 |
| NFIB       | 9p23-p22.3    | 0.181559 | 0.000362 | 0.001168 |
| FDX1       | 11q22.3       | -0.18155 | 0.000362 | 0.001168 |
| PTCD3      | 2p11.2        | -0.18155 | 0.000362 | 0.001169 |
| ARHGAP18   | 6q22.33       | 0.181531 | 0.000362 | 0.00117  |

|           |                     |          |          |          |
|-----------|---------------------|----------|----------|----------|
| ADAM19    | 5q33.3              | 0.181519 | 0.000363 | 0.001171 |
| SEMA7A    | 15q24.1             | 0.181511 | 0.000363 | 0.001171 |
| CEP83     | 12q22               | -0.18147 | 0.000364 | 0.001175 |
| OLFML1    | 11p15.4             | 0.181444 | 0.000365 | 0.001177 |
| HECW1     | 7p14.1-p13          | 0.181443 | 0.000365 | 0.001177 |
| RPL3      | 22q13.1             | -0.18144 | 0.000365 | 0.001177 |
| CD300LB   | 17q25.1             | 0.181413 | 0.000366 | 0.001179 |
| JUND      | 19p13.11            | -0.18141 | 0.000366 | 0.00118  |
| SEL1L3    | 4p15.2              | 0.181396 | 0.000366 | 0.00118  |
| GCH1      | 14q22.2             | 0.181388 | 0.000366 | 0.001181 |
| DNASE1L2  | 16p13.3             | -0.18138 | 0.000366 | 0.001181 |
| GATM      | 15q21.1             | 0.181345 | 0.000368 | 0.001184 |
| FAM199X   | Xq22.2              | 0.181343 | 0.000368 | 0.001184 |
| DOCK9     | 13q32.3             | 0.181309 | 0.000369 | 0.001187 |
| TTC12     | 11q23.2             | -0.18127 | 0.00037  | 0.00119  |
| ASPH      | 8q12.3              | 0.18127  | 0.00037  | 0.001191 |
| NEXN      | 1p31.1              | 0.181267 | 0.00037  | 0.001191 |
| SORCS2    | 4p16.1              | 0.181258 | 0.00037  | 0.001191 |
| TNFRSF1B  | 1p36.22             | -0.18124 | 0.000371 | 0.001193 |
| STAP1     | 4q13.2              | 0.181225 | 0.000371 | 0.001194 |
| RCOR3     | 1q32.2-q32.3        | 0.181222 | 0.000371 | 0.001194 |
| GIMAP7    | 7q36.1              | 0.18121  | 0.000371 | 0.001195 |
| GNG13     | 16p13.3             | 0.181182 | 0.000372 | 0.001197 |
| B3GALT4   | 6p21.32             | 0.181176 | 0.000372 | 0.001198 |
| FGB       | 4q31.3              | -0.18117 | 0.000373 | 0.001198 |
| TOPORS    | 9p21.1              | 0.18115  | 0.000373 | 0.0012   |
| CCDC183   | 9q34.3              | -0.18115 | 0.000373 | 0.0012   |
| FAM122C   | Xq26.3              | -0.18112 | 0.000374 | 0.001202 |
| NRP2      | 2q33.3              | 0.181086 | 0.000375 | 0.001205 |
| DIO2      | 14q31.1             | 0.181084 | 0.000375 | 0.001205 |
| RPS12     | 6q23.2              | -0.18106 | 0.000376 | 0.001207 |
| SH3BGRL2  | 6q14.1              | 0.181043 | 0.000376 | 0.001208 |
| CD1C      | 1q23.1              | 0.181035 | 0.000376 | 0.001209 |
| NCBP2     | 3q29                | -0.181   | 0.000377 | 0.001212 |
| RSPH10B2  | 7p22.1              | -0.181   | 0.000377 | 0.001212 |
| ENO3      | 17p13.2             | -0.18098 | 0.000378 | 0.001213 |
| FLNA      | Xq28                | 0.180969 | 0.000378 | 0.001214 |
| PDGFRL    | 8p22                | 0.180965 | 0.000378 | 0.001214 |
| WAS       | Xp11.23             | 0.180953 | 0.000379 | 0.001215 |
| LILRA2    | 19q13.42            | 0.180896 | 0.00038  | 0.00122  |
| CUL5      | 11q22.3             | 0.180881 | 0.000381 | 0.001221 |
| ZBTB47    | 3p22.1              | 0.180845 | 0.000382 | 0.001225 |
| AKAP12    | 6q25.1              | 0.180838 | 0.000382 | 0.001225 |
| ITM2C     | 2q37.1              | 0.180788 | 0.000383 | 0.001229 |
| ZFP36L1   | 14q24.1             | 0.180772 | 0.000384 | 0.001231 |
| ZNF408    | 11p11.2             | -0.18076 | 0.000384 | 0.001231 |
| SNORC     | 2q37.1              | -0.18075 | 0.000385 | 0.001233 |
| TRMT10B   | 9p13.2              | -0.18074 | 0.000385 | 0.001233 |
| ACR       | 22q13.33            | -0.1807  | 0.000386 | 0.001237 |
| PDE9A     | 21q22.3             | 0.180652 | 0.000387 | 0.001241 |
| LINC00685 | Xp22.33 and Yp11.31 | -0.18061 | 0.000389 | 0.001245 |
| PCSK1     | 5q15                | 0.180599 | 0.000389 | 0.001246 |
| MKKS      | 20p12.2             | -0.1806  | 0.000389 | 0.001246 |
| LOC148709 | 1q32.1              | -0.18058 | 0.00039  | 0.001247 |
| SLC41A3   | 3q21.2-q21.3        | -0.18053 | 0.000391 | 0.001251 |
| ADAMTS7   | 15q25.1             | 0.180498 | 0.000392 | 0.001254 |
| CEP95     | 17q23.3             | -0.18046 | 0.000393 | 0.001258 |
| SEPHS1    | 10p13               | -0.18046 | 0.000393 | 0.001258 |

|              |                |          |          |          |
|--------------|----------------|----------|----------|----------|
| ULK2         | 17p11.2        | 0.180406 | 0.000395 | 0.001262 |
| KBTBD6       | 13q14.11       | -0.1804  | 0.000395 | 0.001263 |
| ST7-OT3      | 7q31.2         | -0.18038 | 0.000396 | 0.001265 |
| SIL1         | 5q31.2         | -0.18035 | 0.000397 | 0.001268 |
| CRISPLD2     | 16q24.1        | 0.180274 | 0.000399 | 0.001274 |
| NLRX1        | 11q23.3        | 0.180273 | 0.000399 | 0.001274 |
| PTPN11       | 12q24.13       | 0.180271 | 0.000399 | 0.001274 |
| FAM41C       | 1p36.33        | -0.18025 | 0.000399 | 0.001276 |
| ACKR2        | 3p22.1         | 0.180216 | 0.0004   | 0.001279 |
| PCDHA4       | 5q31.3         | 0.180215 | 0.0004   | 0.001279 |
| HEXIM2       | 17q21.31       | -0.18019 | 0.000401 | 0.001281 |
| ISG20        | 15q26.1        | 0.180145 | 0.000403 | 0.001285 |
| ABLIM3       | 5q32           | 0.180123 | 0.000403 | 0.001287 |
| SHMT2        | 12q13.3        | -0.18012 | 0.000403 | 0.001287 |
| HIST1H3F     | 6p22.2         | -0.18012 | 0.000404 | 0.001288 |
| CCZ1         | 7p22.1         | -0.18005 | 0.000406 | 0.001294 |
| MIOX         | 22q13.33       | -0.18003 | 0.000406 | 0.001295 |
| ZNF271P      | 18q12.2        | 0.180018 | 0.000407 | 0.001297 |
| ZNF41        | Xp11.3         | 0.179929 | 0.000409 | 0.001305 |
| ZNF48        | 16p11.2        | -0.17992 | 0.000409 | 0.001306 |
| ZFHX4        | 8q21.13        | 0.179908 | 0.00041  | 0.001307 |
| UBQLN2       | Xp11.21        | 0.1799   | 0.00041  | 0.001307 |
| CNTNAP1      | 17q21.2        | 0.179858 | 0.000411 | 0.001311 |
| XRCC2        | 7q36.1         | -0.17984 | 0.000412 | 0.001313 |
| TMEM87B      | 2q13           | 0.179821 | 0.000413 | 0.001315 |
| TNRC6A       | 16p12.1        | 0.17981  | 0.000413 | 0.001315 |
| PCYOX1       | 2p13.3         | 0.179797 | 0.000413 | 0.001317 |
| MST1L        | 1p36.13        | -0.17978 | 0.000414 | 0.001318 |
| ROBO2        | 3p12.3         | 0.179749 | 0.000415 | 0.001321 |
| AGMO         | 7p21.2         | 0.17971  | 0.000416 | 0.001325 |
| SCN11A       | 3p22.2         | 0.17969  | 0.000417 | 0.001326 |
| LOC100130238 | 12q24.33       | -0.17968 | 0.000417 | 0.001327 |
| TUBD1        | 17q23.1        | -0.17965 | 0.000418 | 0.00133  |
| FLNC         | 7q32.1         | 0.179616 | 0.000419 | 0.001333 |
| OPA3         | 19q13.32       | 0.179615 | 0.000419 | 0.001333 |
| GRIN2C       | 17q25.1        | -0.1796  | 0.00042  | 0.001334 |
| ZNF597       | 16p13.3        | 0.179582 | 0.00042  | 0.001336 |
| PHTF2        | 7q11.23-q21.11 | 0.179536 | 0.000422 | 0.00134  |
| SCML4        | 6q21           | -0.17953 | 0.000422 | 0.00134  |
| ZNF292       | 6q14.3         | 0.17953  | 0.000422 | 0.001341 |
| DCTPP1       | 16p11.2        | -0.17945 | 0.000424 | 0.001348 |
| BLK          | 8p23.1         | 0.179421 | 0.000425 | 0.001351 |
| RSPO3        | 6q22.33        | 0.17939  | 0.000426 | 0.001354 |
| RPAIN        | 17p13.2        | -0.17939 | 0.000426 | 0.001354 |
| NPPA         | 1p36.22        | -0.17937 | 0.000427 | 0.001356 |
| GLB1L2       | 11q25          | -0.17935 | 0.000427 | 0.001357 |
| ABR          | 17p13.3        | 0.179342 | 0.000428 | 0.001358 |
| BICD1        | 12p11.21       | 0.179293 | 0.000429 | 0.001363 |
| NUP37        | 12q23.2        | -0.17926 | 0.00043  | 0.001366 |
| OR2W3        | 1q44           | 0.179227 | 0.000431 | 0.001369 |
| PCGF5        | 10q23.32       | 0.179174 | 0.000433 | 0.001374 |
| MED28        | 4p15.32        | -0.17917 | 0.000433 | 0.001374 |
| PNPLA3       | 22q13.31       | 0.179167 | 0.000433 | 0.001375 |
| GRIN2A       | 16p13.2        | 0.179157 | 0.000434 | 0.001376 |
| HMGCS1       | 5p12           | 0.179109 | 0.000435 | 0.00138  |
| RBM23        | 14q11.2        | 0.179098 | 0.000436 | 0.001381 |
| METTL17      | 14q11.2        | -0.17907 | 0.000437 | 0.001384 |
| MYDGF        | 19p13.3        | -0.17904 | 0.000438 | 0.001387 |



|             |              |          |          |          |
|-------------|--------------|----------|----------|----------|
| SAMHD1      | 20q11.23     | 0.179041 | 0.000438 | 0.001387 |
| MAIP1       | 2q33.1       | -0.17902 | 0.000438 | 0.001388 |
| TPSB2       | 16p13.3      | 0.179017 | 0.000438 | 0.001389 |
| ADAM12      | 10q26.2      | 0.178989 | 0.000439 | 0.001391 |
| EIF3D       | 22q12.3      | -0.17899 | 0.000439 | 0.001391 |
| ABHD15      | 17q11.2      | 0.178921 | 0.000442 | 0.001398 |
| LINC01106   | 2q13         | -0.17891 | 0.000442 | 0.001399 |
| NR2F6       | 19p13.11     | -0.17891 | 0.000442 | 0.001399 |
| C2CD4D-AS1  | 1q21.3       | 0.178905 | 0.000442 | 0.001399 |
| ZBTB43      | 9q33.3       | 0.178885 | 0.000443 | 0.001401 |
| HPRT1       | Xq26.2-q26.3 | -0.17887 | 0.000443 | 0.001402 |
| CEACAM5     | 19q13.2      | 0.178873 | 0.000443 | 0.001402 |
| REXO5       | 16p12.3      | -0.17887 | 0.000443 | 0.001402 |
| RAB1A       | 2p14         | 0.178859 | 0.000444 | 0.001403 |
| LEKR1       | 3q25.31      | -0.17884 | 0.000444 | 0.001405 |
| ZZZ3        | 1p31.1       | 0.178839 | 0.000444 | 0.001405 |
| VPS29       | 12q24.11     | -0.1788  | 0.000445 | 0.001408 |
| ZNF682      | 19p12        | -0.17879 | 0.000446 | 0.00141  |
| LRRC31      | 3q26.2       | 0.178781 | 0.000446 | 0.00141  |
| CCDC80      | 3q13.2       | 0.178776 | 0.000446 | 0.00141  |
| CLEC17A     | 19p13.12     | 0.178737 | 0.000448 | 0.001414 |
| MIR4435-2HG | 2q13         | -0.17872 | 0.000448 | 0.001415 |
| CD164       | 6q21         | 0.178703 | 0.000449 | 0.001417 |
| FLJ44635    | Xq13.1       | -0.17868 | 0.00045  | 0.001419 |
| KLHDC9      | 1q23.3       | -0.17867 | 0.00045  | 0.00142  |
| CIPC        | 14q24.3      | 0.178657 | 0.00045  | 0.001422 |
| DUOXA1      | 15q21.1      | 0.178628 | 0.000451 | 0.001424 |
| FBLN5       | 14q32.12     | 0.178593 | 0.000453 | 0.001428 |
| LRRC55      | 11q12.1      | 0.178579 | 0.000453 | 0.001429 |
| SLC1A3      | 5p13.2       | 0.17856  | 0.000454 | 0.001431 |
| CDC5L       | 6p21.1       | 0.178551 | 0.000454 | 0.001432 |
| SLC17A9     | 20q13.33     | -0.17853 | 0.000455 | 0.001434 |
| PLB1        | 2p23.2       | -0.17851 | 0.000455 | 0.001436 |
| STAG3L3     | 7q11.23      | -0.1785  | 0.000456 | 0.001436 |
| SRGN        | 10q22.1      | 0.178493 | 0.000456 | 0.001437 |
| EGR2        | 10q21.3      | 0.178437 | 0.000458 | 0.001443 |
| CHTF8       | 16q22.1      | 0.178435 | 0.000458 | 0.001443 |
| TIMM10B     | 11p15.4      | -0.17839 | 0.000459 | 0.001448 |
| MCM3AP      | 21q22.3      | 0.178358 | 0.000461 | 0.001451 |
| ADAMTS2     | 5q35.3       | 0.178339 | 0.000461 | 0.001453 |
| APBB3       | 5q31.3       | -0.1783  | 0.000463 | 0.001457 |
| VPS13A      | 9q21.2       | 0.178274 | 0.000464 | 0.001459 |
| NBAS        | 2p24.3       | 0.178245 | 0.000465 | 0.001462 |
| FMO5        | 1q21.1       | 0.178241 | 0.000465 | 0.001463 |
| ADCYAP1     | 18p11.32     | 0.17821  | 0.000466 | 0.001466 |
| TXNDC11     | 16p13.13     | 0.178206 | 0.000466 | 0.001466 |
| PRRG3       | Xq28         | 0.178157 | 0.000468 | 0.001471 |
| MUC13       | 3q21.2       | 0.178152 | 0.000468 | 0.001471 |
| VGLL4       | 3p25.3-p25.2 | 0.17815  | 0.000468 | 0.001471 |
| PCDHAC1     | 5q31.3       | 0.178099 | 0.00047  | 0.001477 |
| PCDHGA10    | 5q31.3       | 0.178091 | 0.00047  | 0.001477 |
| DIP2C       | 10p15.3      | 0.178067 | 0.000471 | 0.00148  |
| USP24       | 1p32.3       | 0.17803  | 0.000472 | 0.001484 |
| MAPK10      | 4q21.3       | 0.178025 | 0.000472 | 0.001484 |
| RAB10       | 2p23.3       | 0.178014 | 0.000473 | 0.001485 |
| ARL6IP5     | 3p14.1       | 0.178006 | 0.000473 | 0.001486 |
| SLC44A4     | 6p21.33      | 0.178002 | 0.000473 | 0.001486 |
| TNS4        | 17q21.2      | 0.177947 | 0.000475 | 0.001492 |

|           |                |          |          |          |
|-----------|----------------|----------|----------|----------|
| HMG3      | 6q14.1         | -0.17793 | 0.000476 | 0.001493 |
| ZNF135    | 19q13.43       | 0.177926 | 0.000476 | 0.001494 |
| LOX       | 5q23.1         | 0.177914 | 0.000476 | 0.001495 |
| NUTM2G    | 9q22.33        | -0.1779  | 0.000477 | 0.001496 |
| SNAP91    | 6q14.2         | 0.177877 | 0.000477 | 0.001498 |
| C11ORF49  | 11p11.2        | -0.17786 | 0.000478 | 0.0015   |
| LINC01548 | 21q22.11       | -0.1778  | 0.00048  | 0.001506 |
| PRR3      | 6p21.33        | -0.1778  | 0.00048  | 0.001506 |
| CTPS1     | 1p34.2         | -0.17777 | 0.000481 | 0.00151  |
| C5AR2     | 19q13.32       | 0.177754 | 0.000482 | 0.001511 |
| SETD1B    | 12q24.31       | 0.17775  | 0.000482 | 0.001511 |
| NGDN      | 14q11.2        | -0.17775 | 0.000482 | 0.001511 |
| AXL       | 19q13.2        | 0.177731 | 0.000483 | 0.001513 |
| FUBP3     | 9q34.11-q34.12 | 0.177722 | 0.000483 | 0.001514 |
| PIFO      | 1p13.2         | -0.1777  | 0.000484 | 0.001515 |
| UGT1A10   | 2q37.1         | 0.177692 | 0.000484 | 0.001517 |
| VHL       | 3p25.3         | 0.177683 | 0.000484 | 0.001517 |
| PSAP      | 10q22.1        | 0.177667 | 0.000485 | 0.001519 |
| HNRNPU    | 1q44           | 0.177645 | 0.000486 | 0.001521 |
| GNB5      | 15q21.2        | 0.177638 | 0.000486 | 0.001522 |
| NACA      | 12q13.3        | -0.17764 | 0.000486 | 0.001522 |
| SH3BGRL   | Xq21.1         | 0.177624 | 0.000487 | 0.001523 |
| SRPX2     | Xq22.1         | -0.17762 | 0.000487 | 0.001523 |
| KLF5      | 13q22.1        | 0.177618 | 0.000487 | 0.001523 |
| AKNA      | 9q32           | 0.177496 | 0.000491 | 0.001537 |
| FLG       | 1q21.3         | 0.177483 | 0.000492 | 0.001538 |
| SNORA63   | 3q27.3         | -0.17747 | 0.000492 | 0.001539 |
| BCAR3     | 1p22.1         | 0.177449 | 0.000493 | 0.001541 |
| LSM11     | 5q33.3         | 0.177419 | 0.000494 | 0.001545 |
| ERLEC1    | 2p16.2         | 0.177398 | 0.000495 | 0.001547 |
| ZFAND2A   | 7p22.3         | -0.17734 | 0.000497 | 0.001553 |
| PRH1      | 12p13.2        | -0.17734 | 0.000497 | 0.001553 |
| OXSM      | 3p24.2         | -0.17733 | 0.000497 | 0.001554 |
| DNMT3L    | 21q22.3        | -0.17731 | 0.000498 | 0.001556 |
| B3GNT9    | 16q22.1        | 0.177294 | 0.000499 | 0.001558 |
| ZNF208    | 19p12          | 0.177293 | 0.000499 | 0.001558 |
| ATP1A2    | 1q23.2         | 0.177257 | 0.0005   | 0.001561 |
| C1S       | 12p13.31       | 0.17719  | 0.000503 | 0.001569 |
| TIFAB     | 5q31.1         | 0.177164 | 0.000504 | 0.001572 |
| TIMM9     | 14q23.1        | -0.17711 | 0.000506 | 0.001578 |
| KPNA6     | 1p35.2         | 0.177108 | 0.000506 | 0.001578 |
| ZBTB46    | 20q13.33       | 0.177073 | 0.000507 | 0.001582 |
| WNK1      | 12p13.33       | 0.177055 | 0.000508 | 0.001584 |
| FAM30A    | 14q32.33       | 0.177054 | 0.000508 | 0.001584 |
| YTHDF3    | 8q12.3         | 0.177049 | 0.000508 | 0.001584 |
| SNORD94   | 2p11.2         | -0.17705 | 0.000508 | 0.001584 |
| DNAH14    | 1q42.12        | -0.17705 | 0.000508 | 0.001584 |
| GOT2      | 16q21          | -0.17703 | 0.000509 | 0.001586 |
| SULT2B1   | 19q13.33       | -0.17702 | 0.000509 | 0.001586 |
| CHKB      | 22q13.33       | -0.17702 | 0.000509 | 0.001586 |
| GPR132    | 14q32.33       | 0.17701  | 0.000509 | 0.001587 |
| PPP2R1A   | 19q13.41       | -0.177   | 0.00051  | 0.001588 |
| UNC79     | 14q32.12       | 0.176993 | 0.00051  | 0.001589 |
| PLCB2     | 15q15.1        | 0.176954 | 0.000511 | 0.001593 |
| PARVB     | 22q13.31       | -0.17695 | 0.000512 | 0.001593 |
| SIGLEC12  | 19q13.41       | 0.176938 | 0.000512 | 0.001594 |
| SLC24A4   | 14q32.12       | 0.176927 | 0.000513 | 0.001595 |
| ZNF669    | 1q44           | 0.176858 | 0.000515 | 0.001603 |

|           |                 |          |          |          |
|-----------|-----------------|----------|----------|----------|
| PLEKHG4   | 16q22.1         | -0.17685 | 0.000515 | 0.001604 |
| LINC00894 | Xq28            | -0.17682 | 0.000517 | 0.001607 |
| ZNF184    | 6p22.1          | 0.176801 | 0.000517 | 0.001609 |
| ESYT2     | 7q36.3          | 0.17678  | 0.000518 | 0.001612 |
| SOCS2     | 12q22           | 0.176768 | 0.000519 | 0.001613 |
| PDGFD     | 11q22.3         | 0.176759 | 0.000519 | 0.001614 |
| SLC35A1   | 6q15            | 0.176754 | 0.000519 | 0.001614 |
| CCR3      | 3p21.31         | 0.176735 | 0.00052  | 0.001616 |
| EGFL7     | 9q34.3          | -0.17673 | 0.00052  | 0.001617 |
| CCDC154   | 16p13.3         | -0.17671 | 0.000521 | 0.001619 |
| OTUD5     | Xp11.23         | -0.1767  | 0.000521 | 0.001619 |
| PLAAT5    | 11q12.3         | 0.176691 | 0.000522 | 0.00162  |
| FBN2      | 5q23.3          | 0.176687 | 0.000522 | 0.001621 |
| PLA2G7    | 6p12.3          | 0.176601 | 0.000525 | 0.001631 |
| FCGRT     | 19q13.33        | -0.17659 | 0.000526 | 0.001632 |
| SYNE4     | 19q13.12        | -0.17656 | 0.000527 | 0.001635 |
| SLC36A4   | 11q21           | 0.176554 | 0.000527 | 0.001636 |
| SLC39A9   | 14q24.1         | 0.176549 | 0.000527 | 0.001636 |
| SPOCK1    | 5q31.2          | 0.176504 | 0.000529 | 0.001641 |
| GOLGA8B   | 15q14           | -0.1765  | 0.000529 | 0.001641 |
| MB        | 22q12.3         | 0.176493 | 0.000529 | 0.001642 |
| MTERF2    | 12q23.3         | -0.17649 | 0.00053  | 0.001643 |
| PKDREJ    | 22q13.31        | 0.176448 | 0.000531 | 0.001647 |
| XDH       | 2p23.1          | 0.176419 | 0.000532 | 0.00165  |
| HLA-DQA2  | 6p21.32         | 0.176401 | 0.000533 | 0.001652 |
| APOL6     | 22q12.3         | 0.176385 | 0.000534 | 0.001654 |
| SIX4      | 14q23.1         | 0.176385 | 0.000534 | 0.001654 |
| TNFRSF11B | 8q24.12         | 0.176341 | 0.000535 | 0.001659 |
| ARHGAP35  | 19q13.32        | 0.176249 | 0.000539 | 0.00167  |
| IGDCC4    | 15q22.31        | 0.176208 | 0.000541 | 0.001675 |
| FER1L4    | 20q11.22        | -0.17618 | 0.000542 | 0.001677 |
| CAMLG     | 5q31.1          | -0.17618 | 0.000542 | 0.001678 |
| MNT       | 17p13.3         | 0.176177 | 0.000542 | 0.001678 |
| TCTA      | 3p21.31         | -0.17612 | 0.000544 | 0.001684 |
| NTN5      | 19q13.33        | -0.1761  | 0.000545 | 0.001687 |
| LIPT2     | 11q13.4         | -0.1761  | 0.000545 | 0.001687 |
| NLGN1     | 3q26.31         | 0.176052 | 0.000547 | 0.001692 |
| TFCP2     | 12q13.12-q13.13 | 0.176006 | 0.000549 | 0.001698 |
| FGD5      | 3p25.1          | 0.176005 | 0.000549 | 0.001698 |
| FPR1      | 19q13.41        | 0.175995 | 0.000549 | 0.001699 |
| MYO6      | 6q14.1          | 0.175992 | 0.000549 | 0.001699 |
| PLXND1    | 3q22.1          | 0.175978 | 0.00055  | 0.0017   |
| TOR1B     | 9q34.11         | 0.175978 | 0.00055  | 0.0017   |
| DCAF1     | 3p21.2          | 0.175974 | 0.00055  | 0.0017   |
| GNL2      | 1p34.3          | -0.17597 | 0.00055  | 0.0017   |
| ARMCX2    | Xq22.1          | 0.175947 | 0.000551 | 0.001703 |
| XKR8      | 1p35.3          | -0.17594 | 0.000551 | 0.001703 |
| ZNF354C   | 5q35.3          | 0.175939 | 0.000552 | 0.001703 |
| SNX20     | 16q12.1         | 0.175938 | 0.000552 | 0.001703 |
| GRAMD2B   | 5q23.2          | 0.175936 | 0.000552 | 0.001703 |
| RLF       | 1p34.2          | 0.175927 | 0.000552 | 0.001704 |
| FAM227A   | 22q13.1         | -0.17589 | 0.000554 | 0.001709 |
| CORO1B    | 11q13.2         | -0.17588 | 0.000554 | 0.00171  |
| XBP1      | 22q12.1 22q12   | 0.175838 | 0.000556 | 0.001715 |
| C7        | 5p13.1          | 0.175824 | 0.000556 | 0.001716 |
| PKP4      | 2q24.1          | 0.175816 | 0.000557 | 0.001717 |
| CITED4    | 1p34.2 1p35-p34 | -0.17582 | 0.000557 | 0.001717 |
| HSD17B8   | 6p21.32         | -0.17581 | 0.000557 | 0.001717 |

|              |                    |          |          |          |
|--------------|--------------------|----------|----------|----------|
| PDE2A        | 11q13.4            | 0.175781 | 0.000558 | 0.001721 |
| LOC100132215 | 2p15               | -0.17577 | 0.000558 | 0.001722 |
| IL4R         | 16p12.1            | 0.175712 | 0.000561 | 0.001729 |
| HARS         | 5q31.3             | -0.17571 | 0.000561 | 0.001729 |
| PLOD3        | 7q22.1             | -0.1757  | 0.000561 | 0.00173  |
| SLC35B2      | 6p21.1             | -0.17567 | 0.000562 | 0.001733 |
| WFDC10B      | 20q13.12           | -0.17567 | 0.000563 | 0.001734 |
| MGAT4B       | 5q35.3             | -0.17563 | 0.000564 | 0.001739 |
| KLHL4        | Xq21.31            | 0.175621 | 0.000565 | 0.001739 |
| CCDC116      | 22q11.21           | -0.17562 | 0.000565 | 0.001739 |
| AMFR         | 16q13              | -0.17555 | 0.000568 | 0.001748 |
| NFATC1       | 18q23              | 0.175532 | 0.000568 | 0.00175  |
| AKR7L        | 1p36.13 1p35-p36.1 | -0.1755  | 0.00057  | 0.001753 |
| HTR2A        | 13q14.2            | 0.175489 | 0.00057  | 0.001755 |
| SLC35A2      | Xp11.23            | -0.17548 | 0.000571 | 0.001756 |
| C5ORF22      | 5p13.3             | 0.175471 | 0.000571 | 0.001756 |
| DYNC2LI1     | 2p21               | -0.17547 | 0.000571 | 0.001757 |
| KCNH1        | 1q32.2             | 0.175456 | 0.000572 | 0.001758 |
| BCAS4        | 20q13.13           | -0.17545 | 0.000572 | 0.001758 |
| DHRS2        | 14q11.2            | -0.17544 | 0.000572 | 0.001759 |
| JPT1         | 17q25.1            | -0.17541 | 0.000573 | 0.001763 |
| ZNF346       | 5q35.2             | -0.17539 | 0.000574 | 0.001766 |
| SMG7         | 1q25.3             | 0.17535  | 0.000576 | 0.00177  |
| ALPK2        | 18q21.31-q21.32    | 0.17531  | 0.000578 | 0.001775 |
| FOXK2        | 17q25.3            | -0.1753  | 0.000578 | 0.001776 |
| PLP1         | Xq22.2             | 0.175304 | 0.000578 | 0.001776 |
| CDC27        | 17q21.32           | 0.175297 | 0.000578 | 0.001776 |
| GDAP1L1      | 20q13.12           | -0.17526 | 0.00058  | 0.001781 |
| RNF141       | 11p15.4 11p15      | 0.175215 | 0.000582 | 0.001786 |
| LRRC10B      | 11q12.2            | -0.1752  | 0.000582 | 0.001788 |
| HOMEZ        | 14q11.2            | 0.175152 | 0.000585 | 0.001794 |
| MDP1         | 14q12              | -0.17515 | 0.000585 | 0.001794 |
| SP140        | 2q37.1             | 0.175142 | 0.000585 | 0.001795 |
| CDX2         | 13q12.2            | -0.17514 | 0.000585 | 0.001795 |
| HSDL1        | 16q24.1            | -0.17511 | 0.000586 | 0.001798 |
| CBX4         | 17q25.3            | -0.1751  | 0.000587 | 0.001799 |
| NRTN         | 19p13.3            | -0.17506 | 0.000589 | 0.001805 |
| TOP1P1       | 1q24.3             | -0.17504 | 0.00059  | 0.001808 |
| PHOX2B       | 4p13               | 0.174965 | 0.000593 | 0.001817 |
| KRT83        | 12q13.13           | -0.17496 | 0.000593 | 0.001817 |
| TTLL10       | 1p36.33            | -0.17494 | 0.000594 | 0.00182  |
| ASAP3        | 1p36.12            | 0.174935 | 0.000594 | 0.00182  |
| PIGR         | 1q32.1             | 0.174894 | 0.000596 | 0.001825 |
| PCDHGA3      | 5q31.3             | 0.174881 | 0.000596 | 0.001827 |
| NECAB1       | 8q21.3             | 0.174861 | 0.000597 | 0.001829 |
| CASR         | 3q13.33-q21.1      | 0.174856 | 0.000597 | 0.001829 |
| PHB2         | 12p13.31           | -0.17485 | 0.000598 | 0.00183  |
| ABCA3        | 16p13.3            | 0.174837 | 0.000598 | 0.001831 |
| CLCN5        | Xp11.23            | -0.17484 | 0.000598 | 0.001831 |
| STK32B       | 4p16.2             | 0.174836 | 0.000598 | 0.001831 |
| MMP2         | 16q12.2            | 0.174797 | 0.0006   | 0.001836 |
| MRS2P2       | 12q21.1            | -0.17479 | 0.0006   | 0.001836 |
| CCT3         | 1q22               | -0.17478 | 0.000601 | 0.001838 |
| CLP1         | 11q12.1            | -0.17475 | 0.000602 | 0.001842 |
| TBC1D3       | 17q12              | -0.17475 | 0.000602 | 0.001842 |
| WEE2-AS1     | 7q34               | 0.174725 | 0.000603 | 0.001844 |
| SHISA2       | 13q12.13           | 0.174704 | 0.000604 | 0.001847 |
| PRELID3A     | 18p11.21           | -0.1747  | 0.000604 | 0.001848 |

|           |          |          |          |          |
|-----------|----------|----------|----------|----------|
| LMAN2     | 5q35.3   | -0.17467 | 0.000605 | 0.001851 |
| B4GALNT4  | 11p15.5  | -0.17466 | 0.000606 | 0.001852 |
| SNX9      | 6q25.3   | 0.174626 | 0.000608 | 0.001857 |
| RAN       | 12q24.33 | -0.17461 | 0.000608 | 0.001859 |
| GDF6      | 8q22.1   | 0.174558 | 0.000611 | 0.001865 |
| C1ORF198  | 1q42.2   | 0.17449  | 0.000614 | 0.001874 |
| ZBTB49    | 4p16.3   | -0.17448 | 0.000614 | 0.001876 |
| FNBP4     | 11p11.2  | -0.17446 | 0.000615 | 0.001878 |
| CACTIN    | 19p13.3  | -0.17445 | 0.000616 | 0.001879 |
| PDGFRB    | 5q32     | 0.17444  | 0.000616 | 0.00188  |
| EXOSC6    | 16q22.1  | -0.17444 | 0.000616 | 0.00188  |
| ENAM      | 4q13.3   | 0.174411 | 0.000617 | 0.001883 |
| PLAC1     | Xq26.3   | -0.17441 | 0.000617 | 0.001883 |
| FGFBP1    | 4p15.32  | 0.174405 | 0.000617 | 0.001884 |
| TFF1      | 21q22.3  | 0.174359 | 0.00062  | 0.00189  |
| LOC646214 | 15q11.2  | 0.174353 | 0.00062  | 0.00189  |
| HRG       | 3q27.3   | -0.17435 | 0.00062  | 0.00189  |
| LDLRAD2   | 1p36.12  | -0.17434 | 0.00062  | 0.001891 |
| TRIQQ     | 8q22.1   | 0.17432  | 0.000621 | 0.001894 |
| SLC25A2   | 5q31.3   | -0.17431 | 0.000622 | 0.001896 |
| ZBTB38    | 3q23     | 0.174291 | 0.000623 | 0.001897 |
| MEOX2     | 7p21.2   | 0.17429  | 0.000623 | 0.001897 |
| EHBP1     | 2p15     | 0.174284 | 0.000623 | 0.001898 |
| SLC5A3    | 21q22.11 | 0.174281 | 0.000623 | 0.001898 |
| LINC00324 | 17p13.1  | 0.174271 | 0.000624 | 0.001899 |
| TSPAN31   | 12q14.1  | -0.17427 | 0.000624 | 0.0019   |
| TCEAL8    | Xq22.1   | 0.174231 | 0.000625 | 0.001904 |
| GDNF      | 5p13.2   | 0.174216 | 0.000626 | 0.001906 |
| BRD7      | 16q12.1  | -0.17419 | 0.000627 | 0.00191  |
| LMO3      | 12p12.3  | 0.174185 | 0.000628 | 0.00191  |
| FAM225B   | 9q32     | 0.174177 | 0.000628 | 0.00191  |
| GALNT2    | 1q42.13  | 0.17417  | 0.000628 | 0.001911 |
| TPD52     | 8q21.13  | 0.174132 | 0.00063  | 0.001916 |
| TUBGCP6   | 22q13.33 | -0.17412 | 0.000631 | 0.001918 |
| SCARNA9L  | Xp22.12  | -0.17411 | 0.000631 | 0.001918 |
| TTC31     | 2p13.1   | -0.17411 | 0.000631 | 0.001919 |
| CCDC91    | 12p11.22 | 0.174076 | 0.000633 | 0.001923 |
| RNF138P1  | 5q11.2   | 0.174047 | 0.000634 | 0.001927 |
| CTSG      | 14q12    | 0.174041 | 0.000634 | 0.001927 |
| STAB2     | 12q23.3  | 0.173981 | 0.000637 | 0.001935 |
| TMBIM6    | 12q13.12 | 0.173962 | 0.000638 | 0.001938 |
| ACADM     | 1p31.1   | 0.173918 | 0.00064  | 0.001944 |
| PIGT      | 20q13.12 | -0.17389 | 0.000641 | 0.001947 |
| ZNF267    | 16p11.2  | 0.173883 | 0.000642 | 0.001948 |
| MEST      | 7q32.2   | -0.17387 | 0.000642 | 0.001949 |
| C14ORF93  | 14q11.2  | -0.17384 | 0.000643 | 0.001953 |
| MYO1G     | 7p13     | 0.173792 | 0.000646 | 0.00196  |
| PPP1R3C   | 10q23.32 | 0.173785 | 0.000646 | 0.001961 |
| OR6T1     | 11q24.1  | 0.173766 | 0.000647 | 0.001963 |
| DEAF1     | 11p15.5  | -0.17375 | 0.000648 | 0.001966 |
| SHBG      | 17p13.1  | -0.17374 | 0.000648 | 0.001966 |
| SPAG9     | 17q21.33 | 0.173725 | 0.000649 | 0.001968 |
| ZKSCAN2   | 16p12.1  | 0.173714 | 0.00065  | 0.00197  |
| LINC00852 | 3p25.3   | -0.17371 | 0.00065  | 0.00197  |
| SDC4      | 20q13.12 | -0.17371 | 0.00065  | 0.00197  |
| ONECUT1   | 15q21.3  | 0.17368  | 0.000651 | 0.001974 |
| BTLA      | 3q13.2   | 0.17367  | 0.000652 | 0.001975 |
| SNORA31   | 13q14.13 | -0.17364 | 0.000653 | 0.001978 |

|           |          |          |          |          |
|-----------|----------|----------|----------|----------|
| MTX2      | 2q31.1   | -0.17362 | 0.000654 | 0.001981 |
| SHF       | 15q21.1  | 0.173566 | 0.000657 | 0.001989 |
| PDCL3P4   | 3q12.3   | -0.17354 | 0.000658 | 0.001992 |
| SNRNP40   | 1p35.2   | -0.17353 | 0.000658 | 0.001993 |
| KIAA1549L | 11p13    | 0.173477 | 0.000661 | 0.002001 |
| FAM155A   | 13q33.3  | 0.173472 | 0.000661 | 0.002001 |
| MRPS21    | 1q21.2   | -0.17344 | 0.000663 | 0.002006 |
| SMIM12    | 1p34.3   | -0.17342 | 0.000664 | 0.002009 |
| PARP15    | 3q21.1   | 0.173415 | 0.000664 | 0.002009 |
| F5        | 1q24.2   | 0.173404 | 0.000664 | 0.00201  |
| SSC5D     | 19q13.42 | 0.173375 | 0.000666 | 0.002014 |
| FHL2      | 2q12.2   | 0.173342 | 0.000667 | 0.002019 |
| ZMYM4     | 1p34.3   | 0.17334  | 0.000667 | 0.002019 |
| HIST2H2AB | 1q21.2   | -0.17331 | 0.000669 | 0.002024 |
| LIAS      | 4p14     | -0.17323 | 0.000673 | 0.002034 |
| ADAP2     | 17q11.2  | 0.173229 | 0.000673 | 0.002034 |
| F12       | 5q35.3   | -0.17321 | 0.000674 | 0.002036 |
| PRSS8     | 16p11.2  | -0.17318 | 0.000675 | 0.002041 |
| TP53TG1   | 7q21.12  | -0.17315 | 0.000677 | 0.002045 |
| EMILIN1   | 2p23.3   | 0.173131 | 0.000678 | 0.002048 |
| CPNE8     | 12q12    | 0.173111 | 0.000679 | 0.00205  |
| SLC22A4   | 5q31.1   | -0.17309 | 0.00068  | 0.002053 |
| CNGA3     | 2q11.2   | 0.173088 | 0.00068  | 0.002053 |
| UBIAD1    | 1p36.22  | -0.17308 | 0.00068  | 0.002053 |
| MAPK8IP3  | 16p13.3  | -0.17302 | 0.000683 | 0.002063 |
| GOSR1     | 17q11.2  | 0.173009 | 0.000684 | 0.002064 |
| STC2      | 5q35.2   | -0.17299 | 0.000685 | 0.002066 |
| H1FX-AS1  | 3q21.3   | -0.17299 | 0.000685 | 0.002067 |
| ZBTB7B    | 1q21.3   | 0.172972 | 0.000686 | 0.002069 |
| DIPK2A    | 3q24     | 0.172955 | 0.000687 | 0.002071 |
| KCTD6     | 3p14.3   | -0.17291 | 0.000689 | 0.002077 |
| C3ORF38   | 3p11.1   | 0.17288  | 0.00069  | 0.002082 |
| TEX10     | 9q31.1   | -0.17286 | 0.000691 | 0.002084 |
| LPCAT4    | 15q14    | 0.172813 | 0.000694 | 0.002091 |
| MYO9B     | 19p13.11 | 0.172811 | 0.000694 | 0.002091 |
| PLPP2     | 19p13.3  | -0.17279 | 0.000695 | 0.002094 |
| RPS6KA2   | 6q27     | 0.172783 | 0.000695 | 0.002095 |
| PDZRN4    | 12q12    | 0.172696 | 0.0007   | 0.002108 |
| TMEM63B   | 6p21.1   | 0.172684 | 0.0007   | 0.002109 |
| ABCC6     | 16p13.11 | -0.17268 | 0.0007   | 0.002109 |
| OIT3      | 10q22.1  | -0.17267 | 0.000701 | 0.002111 |
| IL5RA     | 3p26.2   | 0.172665 | 0.000701 | 0.002111 |
| MROH6     | 8q24.3   | -0.17265 | 0.000702 | 0.002113 |
| CCN3      | 8q24.12  | 0.17264  | 0.000702 | 0.002114 |
| SFSWAP    | 12q24.33 | -0.17263 | 0.000703 | 0.002116 |
| PLXNB2    | 22q13.33 | 0.172584 | 0.000705 | 0.002122 |
| ZNF341    | 20q11.22 | -0.17257 | 0.000706 | 0.002125 |
| PDE1A     | 2q32.1   | 0.172561 | 0.000706 | 0.002125 |
| TMEM82    | 1p36.21  | -0.17255 | 0.000707 | 0.002126 |
| PTGER3    | 1p31.1   | 0.172505 | 0.000709 | 0.002133 |
| WFDC9     | 20q13.12 | -0.1725  | 0.00071  | 0.002134 |
| COQ3      | 6q16.2   | -0.17246 | 0.000712 | 0.00214  |
| TBC1D10A  | 22q12.2  | 0.172431 | 0.000713 | 0.002144 |
| CD27-AS1  | 12p13.31 | -0.17243 | 0.000713 | 0.002144 |
| CXCR2     | 2q35     | 0.172421 | 0.000714 | 0.002145 |
| KANK4     | 1p31.3   | 0.17242  | 0.000714 | 0.002145 |
| PRPF4B    | 6p25.2   | 0.172412 | 0.000714 | 0.002145 |
| TDRP      | 8p23.3   | 0.172405 | 0.000714 | 0.002146 |

|             |               |          |          |          |
|-------------|---------------|----------|----------|----------|
| FER         | 5q21.3        | 0.172368 | 0.000716 | 0.002152 |
| TMEM39A     | 3q13.33       | 0.172366 | 0.000717 | 0.002152 |
| HIST2H3D    | 1q21.2        | -0.17236 | 0.000717 | 0.002152 |
| FAHD1       | 16p13.3       | -0.17233 | 0.000718 | 0.002156 |
| SCARNA10    | 12p13.31      | -0.1723  | 0.00072  | 0.002161 |
| DUSP2       | 2q11.2        | -0.17229 | 0.000721 | 0.002163 |
| TTC25       | 17q21.2       | -0.17228 | 0.000721 | 0.002164 |
| LOXHD1      | 18q21.1       | 0.17227  | 0.000722 | 0.002165 |
| ACPP        | 3q22.1        | 0.172251 | 0.000723 | 0.002168 |
| TIMD4       | 5q33.3        | 0.172247 | 0.000723 | 0.002168 |
| MYO1D       | 17q11.2       | 0.172204 | 0.000725 | 0.002174 |
| PHGDH       | 1p12          | -0.1722  | 0.000725 | 0.002175 |
| AKR7A2P1    | 1p13.2        | -0.17219 | 0.000726 | 0.002176 |
| PTER        | 10p13         | 0.172185 | 0.000726 | 0.002176 |
| OS9         | 12q13.3-q14.1 | 0.172182 | 0.000726 | 0.002176 |
| MAP6D1      | 3q27.1        | -0.17218 | 0.000726 | 0.002176 |
| AFAP1-AS1   | 4p16.1        | 0.172177 | 0.000726 | 0.002176 |
| SNORD116-20 | 15q11.2       | 0.172123 | 0.000729 | 0.002185 |
| ATP2A1      | 16p11.2       | -0.17209 | 0.000731 | 0.00219  |
| BANP        | 16q24.2       | -0.17208 | 0.000732 | 0.002191 |
| ABHD16A     | 6p21.33       | -0.17204 | 0.000734 | 0.002197 |
| LONRF2      | 2q11.2        | 0.172024 | 0.000734 | 0.002199 |
| SLC7A2      | 8p22          | 0.172016 | 0.000735 | 0.0022   |
| TNS2        | 12q13.13      | 0.172002 | 0.000736 | 0.002202 |
| KCNQ4       | 1p34.2        | 0.171975 | 0.000737 | 0.002206 |
| TAF1A       | 1q41          | 0.171962 | 0.000738 | 0.002208 |
| SCARA5      | 8p21.1        | 0.171888 | 0.000742 | 0.002219 |
| TSTD1       | 1q23.3        | -0.17183 | 0.000745 | 0.002227 |
| LCK         | 1p35.2        | 0.171833 | 0.000745 | 0.002227 |
| GPR65       | 14q31.3       | 0.171784 | 0.000747 | 0.002235 |
| SSTR3       | 22q13.1       | 0.171768 | 0.000748 | 0.002237 |
| CACNG4      | 17q24.2       | -0.17175 | 0.000749 | 0.00224  |
| C4A         | 6p21.33       | 0.171717 | 0.000751 | 0.002245 |
| C1R         | 12p13.31      | 0.171678 | 0.000753 | 0.002251 |
| ANKFN1      | 17q22         | 0.171667 | 0.000754 | 0.002252 |
| CEP128      | 14q31.1       | 0.171642 | 0.000755 | 0.002256 |
| ATL3        | 11q13.1       | 0.171623 | 0.000756 | 0.002259 |
| PPP3CB      | 10q22.2       | 0.17162  | 0.000756 | 0.002259 |
| CFAP36      | 2p16.1        | -0.17161 | 0.000757 | 0.00226  |
| QARS        | 3p21.31       | -0.1716  | 0.000758 | 0.002262 |
| SMIM8       | 6q15          | -0.17159 | 0.000758 | 0.002262 |
| VDR         | 12q13.11      | 0.171588 | 0.000758 | 0.002263 |
| MYH7B       | 20q11.22      | -0.17159 | 0.000758 | 0.002263 |
| GLT8D2      | 12q23.3       | 0.17157  | 0.000759 | 0.002265 |
| PLEKHA1     | 10q26.13      | 0.171556 | 0.00076  | 0.002267 |
| MOGAT3      | 7q22.1        | -0.17155 | 0.00076  | 0.002267 |
| BAALC       | 8q22.3        | 0.171531 | 0.000761 | 0.00227  |
| ADAMTSL4    | 1q21.2        | 0.171499 | 0.000763 | 0.002275 |
| RSPO2       | 8q23.1        | 0.17149  | 0.000763 | 0.002276 |
| RHPN1-AS1   | 8q24.3        | -0.17148 | 0.000764 | 0.002277 |
| NDRG1       | 8q24.22       | 0.171461 | 0.000765 | 0.002281 |
| FN3K        | 17q25.3       | -0.17144 | 0.000766 | 0.002283 |
| MFAP4       | 17p11.2       | 0.171432 | 0.000767 | 0.002285 |
| GLTPD2      | 17p13.2       | -0.17143 | 0.000767 | 0.002285 |
| SARNP       | 12q13.2       | -0.17142 | 0.000767 | 0.002285 |
| OPA1        | 3q29          | 0.171325 | 0.000773 | 0.002301 |
| ADAMTS3     | 4q13.3        | 0.171322 | 0.000773 | 0.002302 |
| RIIAD1      | 1q21.3        | -0.1713  | 0.000774 | 0.002306 |

|          |               |          |          |          |
|----------|---------------|----------|----------|----------|
| PP7080   | 5p15.33       | -0.1712  | 0.000779 | 0.002321 |
| SERF1A   | 5q13.2        | -0.17117 | 0.000781 | 0.002325 |
| MUSK     | 9q31.3        | 0.171173 | 0.000781 | 0.002325 |
| LIPG     | 18q21.1       | 0.171151 | 0.000782 | 0.002328 |
| HEXA     | 15q23         | 0.17115  | 0.000782 | 0.002328 |
| RAB42    | 1p35.3        | 0.171125 | 0.000784 | 0.002332 |
| ARHGEF17 | 11q13.4       | 0.171117 | 0.000784 | 0.002333 |
| SEMG1    | 20q13.12      | 0.1711   | 0.000785 | 0.002336 |
| CPN1     | 10q24.2       | -0.17108 | 0.000786 | 0.002338 |
| CD96     | 3q13.13-q13.2 | 0.171077 | 0.000787 | 0.002339 |
| TMEM59   | 1p32.3        | 0.171061 | 0.000787 | 0.002341 |
| FBXL14   | 12p13.33      | 0.171049 | 0.000788 | 0.002342 |
| STAG3L4  | 7q11.21       | -0.17105 | 0.000788 | 0.002342 |
| HACD3    | 15q22.31      | 0.171018 | 0.00079  | 0.002347 |
| LMNTD2   | 11p15.5       | -0.17098 | 0.000792 | 0.002353 |
| SPRTN    | 1q42.2        | 0.170894 | 0.000797 | 0.002368 |
| FAM193A  | 4p16.3        | 0.170863 | 0.000799 | 0.002373 |
| ZXDC     | 3q21.3        | 0.170856 | 0.000799 | 0.002373 |
| NPY4R    | 10q11.22      | 0.170855 | 0.000799 | 0.002373 |
| TFDP1    | 13q34         | -0.17084 | 0.0008   | 0.002376 |
| UNC119B  | 12q24.31      | 0.170798 | 0.000802 | 0.002382 |
| ATP10A   | 15q12         | 0.17077  | 0.000804 | 0.002387 |
| SNORA3B  | 11p15.4       | -0.17077 | 0.000804 | 0.002387 |
| LPL      | 8p21.3        | 0.170767 | 0.000804 | 0.002387 |
| KTN1-AS1 | 14q22.3       | -0.17076 | 0.000805 | 0.002388 |
| DNM2     | 19p13.2       | 0.170745 | 0.000806 | 0.00239  |
| SERPINA7 | Xq22.3        | -0.17074 | 0.000806 | 0.002391 |
| BCL11A   | 2p16.1        | -0.1707  | 0.000808 | 0.002397 |
| C15ORF48 | 15q21.1       | 0.170651 | 0.000811 | 0.002405 |
| MOB1B    | 4q13.3        | 0.170622 | 0.000813 | 0.002409 |
| RPLP1    | 15q23         | -0.17059 | 0.000815 | 0.002415 |
| ZBED4    | 22q13.33      | 0.170565 | 0.000816 | 0.002419 |
| CEP164   | 11q23.3       | -0.17055 | 0.000817 | 0.002421 |
| GPR108   | 19p13.3       | -0.17054 | 0.000817 | 0.002422 |
| RIN1     | 11q13.2       | -0.17054 | 0.000818 | 0.002422 |
| LIG1     | 19q13.33      | -0.17054 | 0.000818 | 0.002422 |
| SIGLEC9  | 19q13.41      | 0.170495 | 0.00082  | 0.002429 |
| C4ORF36  | 4q21.3        | 0.170458 | 0.000822 | 0.002435 |
| KLHL38   | 8q24.13       | 0.170438 | 0.000823 | 0.002438 |
| HOXB2    | 17q21.32      | 0.170394 | 0.000826 | 0.002446 |
| ADH1A    | 4q23          | 0.170381 | 0.000827 | 0.002448 |
| IGBP1P1  | 14q13.2       | -0.17038 | 0.000827 | 0.002448 |
| CNBP     | 3q21.3        | -0.17036 | 0.000828 | 0.00245  |
| CCNB1    | 5q13.2        | -0.17033 | 0.00083  | 0.002455 |
| MRAS     | 3q22.3        | 0.170333 | 0.00083  | 0.002455 |
| KRTAP5-5 | 11p15.5       | -0.17031 | 0.000831 | 0.002458 |
| WDR31    | 9q32          | 0.170242 | 0.000835 | 0.00247  |
| C12ORF60 | 12p13.1-p12.3 | -0.17024 | 0.000835 | 0.00247  |
| GABRP    | 5q35.1        | 0.170204 | 0.000837 | 0.002476 |
| LMO4     | 1p22.3        | 0.170202 | 0.000838 | 0.002476 |
| NAALADL1 | 11q13.1       | -0.17016 | 0.00084  | 0.002484 |
| MFS6L    | 17p13.1       | 0.170151 | 0.000841 | 0.002484 |
| PIK3R1   | 5q13.1        | 0.170136 | 0.000842 | 0.002486 |
| OPRL1    | 20q13.33      | 0.170134 | 0.000842 | 0.002486 |
| DRICH1   | 22q11.23      | -0.17012 | 0.000843 | 0.002489 |
| S1PR3    | 9q22.1        | 0.170105 | 0.000843 | 0.002491 |
| CACNA1E  | 1q25.3        | 0.170078 | 0.000845 | 0.002496 |
| AMZ2     | 17q24.2       | -0.17003 | 0.000848 | 0.002504 |



|             |               |          |          |          |
|-------------|---------------|----------|----------|----------|
| OSGEP       | 14q11.2       | -0.17001 | 0.000849 | 0.002508 |
| EIF4EBP2    | 10q22.1       | 0.170001 | 0.00085  | 0.002508 |
| LOC646762   | 7p14.3        | -0.16999 | 0.00085  | 0.00251  |
| AQP7P3      | 9q21.11       | -0.16993 | 0.000854 | 0.002521 |
| SUCNR1      | 3q25.1        | 0.169913 | 0.000855 | 0.002523 |
| HAAO        | 2p21          | -0.1699  | 0.000856 | 0.002526 |
| CHRAC1      | 8q24.3        | -0.16989 | 0.000856 | 0.002526 |
| ITPR2       | 12p11.23      | 0.169876 | 0.000857 | 0.002528 |
| ZBTB20      | 3q13.31       | 0.169812 | 0.000861 | 0.00254  |
| ASNA1       | 19p13.13      | -0.1698  | 0.000862 | 0.002542 |
| ST3GAL1     | 8q24.22       | 0.169783 | 0.000863 | 0.002544 |
| THRA        | 17q21.1       | -0.16976 | 0.000865 | 0.002548 |
| CD200R1     | 3q13.2        | 0.169741 | 0.000866 | 0.002551 |
| EXOC6       | 10q23.33      | 0.169718 | 0.000867 | 0.002555 |
| FAM204A     | 10q26.11      | -0.16969 | 0.000869 | 0.00256  |
| TMX2        | 11q12.1       | -0.16969 | 0.000869 | 0.00256  |
| THOC5       | 22q12.2       | -0.16968 | 0.00087  | 0.002561 |
| CCDC153     | 11q23.3       | -0.16966 | 0.00087  | 0.002563 |
| NOVA1       | 14q12         | 0.169661 | 0.000871 | 0.002564 |
| GNB1        | 1p36.33       | 0.169656 | 0.000871 | 0.002564 |
| ACRBP       | 12p13.31      | 0.169655 | 0.000871 | 0.002564 |
| THAP2       | 12q21.1       | 0.169637 | 0.000872 | 0.002567 |
| CRISPLD1    | 8q21.13       | 0.169603 | 0.000874 | 0.002573 |
| ZNF460      | 19q13.43      | 0.169593 | 0.000875 | 0.002574 |
| TBC1D3B     | 17q12         | -0.16957 | 0.000876 | 0.002577 |
| ADRB2       | 5q32          | 0.169499 | 0.000881 | 0.002591 |
| SHISA3      | 4p13          | 0.16949  | 0.000881 | 0.002592 |
| ALDH1A2     | 15q21.3       | 0.169469 | 0.000883 | 0.002595 |
| USP1        | 1p31.3        | 0.169459 | 0.000883 | 0.002597 |
| ERVFRD-1    | 6p24.2        | 0.169451 | 0.000884 | 0.002598 |
| POC5        | 5q13.3        | -0.16944 | 0.000884 | 0.002599 |
| LANCL3      | Xp21.1        | 0.169439 | 0.000885 | 0.002599 |
| FGFBP2      | 4p15.32       | 0.169437 | 0.000885 | 0.002599 |
| PAGE2B      | Xp11.21       | -0.16942 | 0.000886 | 0.002602 |
| DIRAS2      | 9q22.2        | 0.169412 | 0.000886 | 0.002603 |
| KALRN       | 3q21.1-q21.2  | 0.169394 | 0.000887 | 0.002606 |
| PLCD1       | 3p22.2        | 0.169394 | 0.000887 | 0.002606 |
| MIPOL1      | 14q13.3-q21.1 | 0.169381 | 0.000888 | 0.002608 |
| MAPRE1      | 20q11.21      | -0.16935 | 0.00089  | 0.002614 |
| WNT2B       | 1p13.2        | 0.169343 | 0.000891 | 0.002614 |
| PDE7A       | 8q13.1        | -0.16933 | 0.000892 | 0.002617 |
| PCDHA6      | 5q31.3        | 0.169319 | 0.000892 | 0.002618 |
| PSMD9       | 12q24.31      | -0.16931 | 0.000893 | 0.002619 |
| FAM226B     | Xq13.1        | -0.1693  | 0.000894 | 0.002622 |
| SARS2       | 19q13.2       | -0.16926 | 0.000896 | 0.002627 |
| GTPBP1      | 22q13.1       | 0.169258 | 0.000896 | 0.002628 |
| PLEKHG2     | 19q13.2       | 0.169257 | 0.000896 | 0.002628 |
| ERCC3       | 2q14.3        | -0.16926 | 0.000896 | 0.002628 |
| MIRLET7BHG  | 22q13.31      | -0.16921 | 0.000899 | 0.002636 |
| MTFR1L      | 1p36.11       | -0.16921 | 0.000899 | 0.002636 |
| SNRNP200    | 2q11.2        | 0.169192 | 0.0009   | 0.002638 |
| IGSF9B      | 11q25         | 0.169189 | 0.000901 | 0.002639 |
| TIGIT       | 3q13.31       | 0.16915  | 0.000903 | 0.002646 |
| ENPP6       | 4q35.1        | 0.169142 | 0.000904 | 0.002647 |
| SERTAD4-AS1 | 1q32.2        | 0.169112 | 0.000905 | 0.002652 |
| YWHAB       | 20q13.12      | -0.1691  | 0.000906 | 0.002654 |
| FBXO33      | 14q21.1       | 0.16907  | 0.000908 | 0.002659 |
| AFF2        | Xq28          | 0.169055 | 0.000909 | 0.002662 |

|           |          |          |          |          |
|-----------|----------|----------|----------|----------|
| MAD2L1    | 4q27     | -0.16905 | 0.00091  | 0.002663 |
| DCP1A     | 3p21.1   | 0.169039 | 0.00091  | 0.002664 |
| FAM86HP   | 3q22.1   | -0.16901 | 0.000912 | 0.002669 |
| YY1       | 14q32.2  | 0.168944 | 0.000916 | 0.002681 |
| SETD2     | 3p21.31  | 0.168931 | 0.000917 | 0.002683 |
| TMC4      | 19q13.42 | 0.168905 | 0.000919 | 0.002688 |
| DCP2      | 5q22.2   | 0.168868 | 0.000921 | 0.002694 |
| NAPSA     | 19q13.33 | -0.16885 | 0.000922 | 0.002697 |
| KRTAP3-3  | 17q21.2  | -0.16885 | 0.000922 | 0.002697 |
| CEP72     | 5p15.33  | -0.16882 | 0.000925 | 0.002703 |
| ZNF600    | 19q13.41 | -0.16881 | 0.000925 | 0.002704 |
| LINC01134 | 1p36.32  | -0.1688  | 0.000926 | 0.002705 |
| PABPC5    | Xq21.31  | 0.168782 | 0.000927 | 0.002709 |
| RAI14     | 5p13.2   | 0.168769 | 0.000928 | 0.002711 |
| CYP2U1    | 4q25     | 0.16876  | 0.000928 | 0.002712 |
| SARS      | 1p13.3   | -0.16875 | 0.000929 | 0.002714 |
| IGIP      | 5q31.3   | 0.168738 | 0.00093  | 0.002716 |
| FAM180A   | 7q33     | 0.168726 | 0.000931 | 0.002717 |
| RPS27L    | 15q22.2  | 0.168704 | 0.000932 | 0.002721 |
| FGFR1     | 8p11.23  | 0.168662 | 0.000935 | 0.002729 |
| GIMAP1    | 7q36.1   | 0.168661 | 0.000935 | 0.002729 |
| ROR2      | 9q22.31  | 0.168657 | 0.000935 | 0.002729 |
| CDH6      | 5p13.3   | 0.168652 | 0.000936 | 0.00273  |
| TRAF3IP3  | 1q32.2   | 0.168633 | 0.000937 | 0.002733 |
| HMGCR     | 5q13.3   | 0.168593 | 0.00094  | 0.002741 |
| CD200     | 3q13.2   | 0.168587 | 0.00094  | 0.002741 |
| B4GALT3   | 1q23.3   | -0.16857 | 0.000941 | 0.002744 |
| IFI35     | 17q21.31 | -0.16856 | 0.000942 | 0.002746 |
| GALNT12   | 9q22.33  | 0.168516 | 0.000945 | 0.002754 |
| CRHBP     | 5q13.3   | 0.168502 | 0.000946 | 0.002756 |
| SEZ6L     | 22q12.1  | 0.168485 | 0.000947 | 0.002759 |
| OCLN      | 5q13.2   | 0.16846  | 0.000948 | 0.002764 |
| CDKN2A    | 9p21.3   | -0.16845 | 0.000949 | 0.002765 |
| ELAVL3    | 19p13.2  | 0.168399 | 0.000953 | 0.002775 |
| ACOX3     | 4p16.1   | -0.16839 | 0.000953 | 0.002775 |
| GRIA4     | 11q22.3  | 0.168365 | 0.000955 | 0.002781 |
| ZNF273    | 7q11.21  | -0.16836 | 0.000955 | 0.002781 |
| TMSB4XP8  | 4q22.1   | -0.16835 | 0.000956 | 0.002782 |
| BRD1      | 22q13.33 | 0.168333 | 0.000957 | 0.002785 |
| MRI1      | 19p13.13 | -0.16833 | 0.000957 | 0.002785 |
| ZNF837    | 19q13.43 | -0.16833 | 0.000957 | 0.002785 |
| CAPN15    | 16p13.3  | -0.16832 | 0.000958 | 0.002786 |
| CMTR1     | 6p21.2   | -0.16832 | 0.000958 | 0.002787 |
| CDKN1A    | 6p21.2   | 0.168318 | 0.000958 | 0.002787 |
| SOX10     | 22q13.1  | 0.168289 | 0.00096  | 0.002792 |
| WNT3A     | 1q42.13  | -0.16827 | 0.000962 | 0.002796 |
| C7ORF33   | 7q36.1   | -0.16826 | 0.000962 | 0.002796 |
| HEY1      | 8q21.13  | 0.168241 | 0.000963 | 0.0028   |
| SNORA74A  | 5q31.2   | -0.16824 | 0.000963 | 0.0028   |
| CUZD1     | 10q26.13 | -0.16823 | 0.000964 | 0.002802 |
| TBC1D19   | 4p15.2   | 0.168203 | 0.000966 | 0.002807 |
| EIF2D     | 1q32.1   | -0.16817 | 0.000968 | 0.002813 |
| MAP2      | 2q34     | 0.168161 | 0.000969 | 0.002814 |
| SUSD5     | 3p22.3   | 0.168144 | 0.00097  | 0.002817 |
| HIST1H3J  | 6p22.1   | -0.16814 | 0.00097  | 0.002817 |
| STXBP3    | 1p13.3   | 0.168134 | 0.000971 | 0.002818 |
| GRWD1     | 19q13.33 | -0.16812 | 0.000972 | 0.002821 |
| ADGRA3    | 4p15.2   | 0.168042 | 0.000977 | 0.002836 |

|           |               |          |          |          |
|-----------|---------------|----------|----------|----------|
| CSNK1G2   | 19p13.3       | -0.16804 | 0.000977 | 0.002836 |
| HGD       | 3q13.33       | 0.168041 | 0.000977 | 0.002836 |
| FAM200B   | 4p15.32       | -0.16803 | 0.000978 | 0.002838 |
| SLC14A1   | 18q12.3       | 0.167995 | 0.00098  | 0.002844 |
| SLC22A12  | 11q13.1       | -0.16799 | 0.000981 | 0.002846 |
| RASL10B   | 17q12         | -0.16796 | 0.000983 | 0.002851 |
| ZNF454    | 5q35.3        | 0.167953 | 0.000983 | 0.002851 |
| PTPRZ1    | 7q31.32       | 0.16791  | 0.000986 | 0.002859 |
| STOX1     | 10q22.1       | -0.16789 | 0.000987 | 0.002862 |
| ELOVL4    | 6q14.1        | 0.167893 | 0.000987 | 0.002862 |
| EFNB2     | 13q33.3       | 0.167884 | 0.000988 | 0.002863 |
| EFTUD2    | 17q21.31      | -0.16788 | 0.000988 | 0.002863 |
| NIBAN2    | 9q34.11       | 0.167882 | 0.000988 | 0.002863 |
| NUP107    | 12q15         | -0.16788 | 0.000988 | 0.002863 |
| ABCG1     | 21q22.3       | 0.167878 | 0.000988 | 0.002863 |
| NMD3      | 3q26.1        | 0.167873 | 0.000989 | 0.002864 |
| TAB1      | 22q13.1       | -0.16786 | 0.00099  | 0.002865 |
| CNR2      | 1p36.11       | 0.16785  | 0.00099  | 0.002868 |
| FAM167A   | 8p23.1        | 0.167839 | 0.000991 | 0.002869 |
| CPEB1     | 15q25.2       | 0.167823 | 0.000992 | 0.002872 |
| CHRNA4    | 15q25.1       | 0.167808 | 0.000993 | 0.002875 |
| RASGRP3   | 2p22.3        | 0.167807 | 0.000993 | 0.002875 |
| MAPKBP1   | 15q15.1       | 0.167762 | 0.000997 | 0.002883 |
| HNRNPL    | 19q13.2       | -0.16775 | 0.000997 | 0.002885 |
| HSF2BP    | 21q22.3       | -0.16773 | 0.000999 | 0.002889 |
| ACBD7     | 10p13         | -0.16772 | 0.001    | 0.002891 |
| DOP1A     | 6q14.1        | 0.167673 | 0.001003 | 0.0029   |
| DNAJC4    | 11q13.1       | -0.16766 | 0.001004 | 0.002901 |
| NHS       | Xp22.2-p22.13 | 0.167648 | 0.001005 | 0.002904 |
| NSG2      | 5q35.2        | 0.167647 | 0.001005 | 0.002904 |
| MS4A1     | 11q12.2       | 0.167592 | 0.001009 | 0.002915 |
| EFNB3     | 17p13.1       | 0.167578 | 0.00101  | 0.002917 |
| ISG15     | 1p36.33       | -0.16757 | 0.00101  | 0.002918 |
| MAN1B1-DT | 9q34.3        | -0.16756 | 0.001011 | 0.00292  |
| STX17     | 9q31.1        | 0.167555 | 0.001011 | 0.002921 |
| TMEM167B  | 1p13.3        | 0.167549 | 0.001012 | 0.002921 |
| CLIC2     | Xq28          | 0.167549 | 0.001012 | 0.002921 |
| MOCS2     | 5q11.2        | -0.16754 | 0.001013 | 0.002924 |
| GTF2H1    | 11p15.1       | -0.16753 | 0.001013 | 0.002924 |
| CLVS1     | 8q12.2-q12.3  | -0.1675  | 0.001015 | 0.002931 |
| GAPDHS    | 19q13.12      | -0.16748 | 0.001017 | 0.002934 |
| JAKMIP2   | 5q32          | 0.167476 | 0.001017 | 0.002934 |
| ZNF385D   | 3p24.3        | 0.167471 | 0.001017 | 0.002935 |
| RFLNB     | 17p13.3       | 0.167427 | 0.00102  | 0.002943 |
| ZDHHC5    | 11q12.1       | 0.167379 | 0.001024 | 0.002953 |
| IFIH1     | 2q24.2        | 0.167329 | 0.001028 | 0.002963 |
| TMED8     | 14q24.3       | 0.167326 | 0.001028 | 0.002963 |
| PCDHGB3   | 5q31.3        | 0.167316 | 0.001028 | 0.002965 |
| RIC3      | 11p15.4       | 0.167315 | 0.001029 | 0.002965 |
| CCDC144B  | 17p11.2       | 0.16731  | 0.001029 | 0.002965 |
| CLK1      | 2q33.1        | -0.1673  | 0.001029 | 0.002966 |
| CEP83-DT  | 12q22         | -0.1673  | 0.00103  | 0.002966 |
| TBL1XR1   | 3q26.32       | 0.167278 | 0.001031 | 0.002971 |
| KCNK15    | 20q13.12      | -0.16727 | 0.001032 | 0.002973 |
| SH3BP4    | 2q37.2        | 0.16725  | 0.001033 | 0.002976 |
| IL33      | 9p24.1        | 0.167212 | 0.001036 | 0.002983 |
| ODC1      | 2p25.1        | -0.16719 | 0.001038 | 0.002988 |
| ARHGDI1A  | 17q25.3       | -0.16717 | 0.001039 | 0.002992 |

|           |              |          |          |          |
|-----------|--------------|----------|----------|----------|
| TLX1NB    | 10q24.31     | -0.16715 | 0.00104  | 0.002994 |
| PLAT      | 8p11.21      | 0.16714  | 0.001041 | 0.002997 |
| ACKR1     | 1q23.2       | 0.167121 | 0.001043 | 0.003    |
| AGXT      | 2q37.3       | -0.16712 | 0.001043 | 0.003001 |
| AKR7A2    | 1p36.13      | -0.16711 | 0.001044 | 0.003002 |
| PLCG2     | 16q23.3      | 0.167065 | 0.001047 | 0.003011 |
| PDE11A    | 2q31.2       | 0.167044 | 0.001048 | 0.003015 |
| AEBP1     | 7p13         | 0.167033 | 0.001049 | 0.003017 |
| GRB7      | 17q12        | -0.16702 | 0.00105  | 0.00302  |
| BARX1     | 9q22.32      | 0.167007 | 0.001051 | 0.003021 |
| ALK       | 2p23.2-p23.1 | 0.166991 | 0.001052 | 0.003025 |
| MYPN      | 10q21.3      | 0.166968 | 0.001054 | 0.003029 |
| SLC30A5   | 5q13.1-q13.2 | 0.166965 | 0.001054 | 0.003029 |
| PXN       | 12q24.23     | 0.166964 | 0.001054 | 0.003029 |
| MRPS10    | 6p21.1       | -0.16696 | 0.001055 | 0.00303  |
| LRRC32    | 11q13.5      | 0.166912 | 0.001058 | 0.003039 |
| C2        | 6p21.33      | -0.1669  | 0.001059 | 0.003041 |
| EIF3CL    | 16p12.1      | -0.1669  | 0.001059 | 0.003041 |
| FBXO30    | 6q24.3       | 0.166883 | 0.00106  | 0.003044 |
| ABCC6P1   | 16p12.3      | -0.16687 | 0.001061 | 0.003046 |
| HVCN1     | 12q24.11     | 0.166865 | 0.001062 | 0.003047 |
| MTREX     | 5q11.2       | 0.16686  | 0.001062 | 0.003048 |
| NOD1      | 7p14.3       | -0.16684 | 0.001064 | 0.003052 |
| ATXN2     | 12q24.12     | 0.166837 | 0.001064 | 0.003052 |
| NREP      | 5q22.1       | 0.166832 | 0.001064 | 0.003053 |
| LRRC74A   | 14q24.3      | -0.16683 | 0.001064 | 0.003053 |
| ADAM8     | 10q26.3      | 0.166825 | 0.001065 | 0.003053 |
| CISD1     | 10q21.1      | -0.1668  | 0.001066 | 0.003057 |
| CLCA1     | 1p22.3       | 0.166784 | 0.001068 | 0.003061 |
| MRPL30    | 2q11.2       | -0.16677 | 0.001069 | 0.003063 |
| EBF1      | 5q33.3       | 0.16677  | 0.001069 | 0.003063 |
| GOLGA8CP  | 15q11.2      | -0.16676 | 0.00107  | 0.003065 |
| ZFAND4    | 10q11.22     | 0.166745 | 0.001071 | 0.003068 |
| ARNTL2    | 12p11.23     | 0.166697 | 0.001074 | 0.003078 |
| HIST2H2AC | 1q21.2       | -0.16665 | 0.001078 | 0.003088 |
| CXCL16    | 17p13.2      | 0.166624 | 0.00108  | 0.003093 |
| RAB39B    | Xq28         | 0.16662  | 0.00108  | 0.003093 |
| DOK4      | 16q21        | -0.1666  | 0.001082 | 0.003098 |
| IRAK1     | Xq28         | -0.16659 | 0.001083 | 0.003099 |
| CDS1      | 4q21.23      | 0.166567 | 0.001084 | 0.003103 |
| CACNA1H   | 16p13.3      | 0.166533 | 0.001087 | 0.00311  |
| PCGF6     | 10q24.33     | -0.16651 | 0.001088 | 0.003114 |
| KCNQ1OT1  | 11p15.5      | -0.16651 | 0.001088 | 0.003114 |
| WNK4      | 17q21.2      | 0.166509 | 0.001089 | 0.003114 |
| SLC39A13  | 11p11.2      | -0.1665  | 0.001089 | 0.003115 |
| CHST13    | 3q21.3       | -0.1665  | 0.001089 | 0.003115 |
| KDM1A     | 1p36.12      | -0.1665  | 0.00109  | 0.003115 |
| MADD      | 11p11.2      | 0.166487 | 0.00109  | 0.003117 |
| HIST1H2BL | 6p22.1       | -0.16648 | 0.001091 | 0.003119 |
| FAM89A    | 1q42.2       | -0.16646 | 0.001093 | 0.003123 |
| SLC40A1   | 2q32.2       | 0.166435 | 0.001094 | 0.003127 |
| CD300A    | 17q25.1      | 0.166433 | 0.001094 | 0.003127 |
| LOC728613 | 5p15.33      | -0.16641 | 0.001096 | 0.003132 |
| LANCL1    | 2q34         | 0.166407 | 0.001096 | 0.003132 |
| ACAD11    | 3q22.1       | -0.16638 | 0.001098 | 0.003137 |
| REC8      | 14q12        | -0.16638 | 0.001099 | 0.003137 |
| KRTAP5-3  | 11p15.5      | -0.16637 | 0.001099 | 0.003138 |
| UBE2T     | 1q32.1       | -0.16636 | 0.0011   | 0.00314  |

|              |               |          |          |          |
|--------------|---------------|----------|----------|----------|
| CFAP58       | 10q25.1       | 0.166348 | 0.001101 | 0.003143 |
| CMTM4        | 16q21-q22.1   | 0.166338 | 0.001102 | 0.003145 |
| GCNT2        | 6p24.3-p24.2  | 0.166334 | 0.001102 | 0.003145 |
| NECTIN4      | 1q23.3        | 0.166294 | 0.001105 | 0.003153 |
| ARMC2        | 6q21          | -0.16628 | 0.001106 | 0.003156 |
| ADCY5        | 3q21.1        | 0.166261 | 0.001108 | 0.00316  |
| INPP4A       | 2q11.2        | 0.166251 | 0.001109 | 0.003162 |
| GLYATL1      | 11q12.1       | -0.16624 | 0.001109 | 0.003164 |
| FST          | 5q11.2        | 0.166219 | 0.001111 | 0.003168 |
| TCF21        | 6q23.2        | 0.166201 | 0.001112 | 0.003171 |
| JPH2         | 20q13.12      | 0.166201 | 0.001112 | 0.003171 |
| RARRES1      | 3q25.32       | 0.166198 | 0.001113 | 0.003171 |
| SERHL2       | 22q13.2       | -0.16612 | 0.001118 | 0.003187 |
| ZNF667       | 19q13.43      | 0.166099 | 0.00112  | 0.003192 |
| SELENOP      | 5p12          | 0.166087 | 0.001121 | 0.003195 |
| ZNF217       | 20q13.2       | 0.166049 | 0.001124 | 0.003203 |
| NDUFA12      | 12q22         | -0.16604 | 0.001125 | 0.003205 |
| COQ5         | 12q24.31      | -0.16604 | 0.001125 | 0.003205 |
| GARNL3       | 9q33.3        | -0.16602 | 0.001127 | 0.003208 |
| GPKOW        | Xp11.23       | -0.166   | 0.001128 | 0.003211 |
| RPAP1        | 15q15.1       | 0.166002 | 0.001128 | 0.003211 |
| USP36        | 17q25.3       | -0.16595 | 0.001132 | 0.003222 |
| ARHGDIB      | 12p12.3       | 0.165949 | 0.001132 | 0.003222 |
| DUSP22       | 6p25.3        | -0.16593 | 0.001133 | 0.003225 |
| MZB1         | 5q31.2        | 0.165933 | 0.001134 | 0.003225 |
| ASB2         | 14q32.12      | 0.165921 | 0.001135 | 0.003227 |
| CAV1         | 7q31.2        | 0.165911 | 0.001135 | 0.003229 |
| LRTOMT       | 11q13.4       | -0.1659  | 0.001136 | 0.00323  |
| CSMD2        | 1p35.1        | 0.165899 | 0.001136 | 0.00323  |
| ZNF34        | 8q24.3        | -0.16589 | 0.001137 | 0.003232 |
| ANKRD46      | 8q22.3        | -0.16586 | 0.001139 | 0.003239 |
| PPP1R14A     | 19q13.2       | -0.16579 | 0.001145 | 0.003254 |
| SDHAF3       | 7q21.3        | -0.16577 | 0.001147 | 0.003259 |
| URB2         | 1q42.13       | 0.165737 | 0.001149 | 0.003265 |
| GFI1B        | 9q34.13       | 0.165733 | 0.00115  | 0.003265 |
| PAPOLA       | 14q32.2       | 0.165725 | 0.00115  | 0.003267 |
| ZCCHC7       | 9p13.2        | -0.1657  | 0.001152 | 0.003271 |
| CALHM2       | 10q24.33      | 0.165702 | 0.001152 | 0.003271 |
| ZNF264       | 19q13.43      | 0.165682 | 0.001154 | 0.003275 |
| CNOT4        | 7q33          | 0.165679 | 0.001154 | 0.003275 |
| C1QC         | 1p36.12       | 0.165679 | 0.001154 | 0.003275 |
| LOC100134368 | 16p13.3       | -0.16568 | 0.001154 | 0.003275 |
| VPS54        | 2p15-p14      | 0.165662 | 0.001155 | 0.003278 |
| ECT2         | 3q26.31       | 0.165651 | 0.001156 | 0.00328  |
| SPATA13      | 13q12.12      | 0.165649 | 0.001156 | 0.00328  |
| VPS45        | 1q21.2        | 0.165646 | 0.001157 | 0.00328  |
| DAB2         | 5p13.1        | 0.165635 | 0.001157 | 0.003282 |
| STX3         | 11q12.1       | -0.16562 | 0.001158 | 0.003285 |
| TRIM72       | 16p11.2       | 0.165619 | 0.001159 | 0.003285 |
| SYNDIG1      | 20p11.21      | 0.165589 | 0.001161 | 0.003291 |
| F8A1         | Xq28          | -0.16558 | 0.001162 | 0.003293 |
| ADGRE1       | 19p13.3-p13.2 | 0.165507 | 0.001168 | 0.00331  |
| AICDA        | 12p13.31      | 0.165501 | 0.001168 | 0.00331  |
| NR5A2        | 1q32.1        | 0.165481 | 0.00117  | 0.003315 |
| CDC42EP4     | 17q25.1       | 0.165472 | 0.001171 | 0.003316 |
| CD40LG       | Xq26.3        | 0.165438 | 0.001173 | 0.003324 |
| FADS6        | 17q25.1       | -0.16542 | 0.001175 | 0.003327 |
| GALNT15      | 3p25.1        | 0.1654   | 0.001177 | 0.003331 |

|            |                 |          |          |          |
|------------|-----------------|----------|----------|----------|
| MBOAT2     | 2p25.1          | 0.165369 | 0.001179 | 0.003338 |
| OR51E2     | 11p15.4         | 0.165369 | 0.001179 | 0.003338 |
| NR1H4      | 12q23.1         | 0.16534  | 0.001182 | 0.003344 |
| GCK        | 7p13            | -0.16534 | 0.001182 | 0.003345 |
| B3GALT2    | 1q31.2          | 0.165333 | 0.001182 | 0.003345 |
| COL15A1    | 9q22.33         | 0.165325 | 0.001183 | 0.003346 |
| NCF1C      | 7q11.23         | 0.165303 | 0.001185 | 0.003351 |
| FOXN1      | 17q11.2         | 0.165301 | 0.001185 | 0.003351 |
| PRKD3      | 2p22.2          | 0.1653   | 0.001185 | 0.003351 |
| PRORP      | 14q13.2         | 0.165294 | 0.001185 | 0.003352 |
| OBP2A      | 9q34.3          | -0.16525 | 0.001189 | 0.003362 |
| NRG4       | 15q24.2         | 0.165198 | 0.001193 | 0.003373 |
| MUC1       | 1q22            | 0.165187 | 0.001194 | 0.003375 |
| XKR4       | 8q12.1          | 0.16516  | 0.001196 | 0.003381 |
| DHRS13     | 17q11.2         | -0.16515 | 0.001197 | 0.003382 |
| PAN2       | 12q13.3         | -0.16512 | 0.0012   | 0.003389 |
| C6ORF203   | 6q21            | -0.16512 | 0.0012   | 0.003389 |
| PALM3      | 19p13.12        | -0.16512 | 0.0012   | 0.003389 |
| ABITRAM    | 9q31.3          | -0.16508 | 0.001203 | 0.003396 |
| CD69       | 12p13.31        | 0.165084 | 0.001203 | 0.003396 |
| CDK12      | 17q12           | 0.165075 | 0.001204 | 0.003398 |
| FOPNL      | 16p13.11        | -0.16507 | 0.001204 | 0.003399 |
| CADPS2     | 7q31.32         | 0.16505  | 0.001206 | 0.003403 |
| PCAT18     | 18q11.2         | 0.165048 | 0.001206 | 0.003403 |
| UBTD1      | 10q24.1-q24.2   | -0.16503 | 0.001208 | 0.003407 |
| LRRC19     | 9p21.2          | 0.165025 | 0.001208 | 0.003407 |
| EML1       | 14q32.2         | 0.165018 | 0.001208 | 0.003409 |
| TMEM108    | 3q22.1          | 0.164988 | 0.001211 | 0.003415 |
| LFNG       | 7p22.3          | -0.16496 | 0.001213 | 0.003422 |
| MRTFA      | 22q13.1-q13.2   | 0.164957 | 0.001214 | 0.003422 |
| SCN8A      | 12q13.13        | 0.164951 | 0.001214 | 0.003422 |
| OSGEPL1    | 2q32.2          | -0.16495 | 0.001214 | 0.003423 |
| ERI1       | 8p23.1          | 0.164941 | 0.001215 | 0.003424 |
| ADRA2A     | 10q25.2         | 0.164937 | 0.001215 | 0.003424 |
| SNAI2      | 8q11.21         | 0.164847 | 0.001223 | 0.003445 |
| UGT2B15    | 4q13.2          | 0.164815 | 0.001226 | 0.003453 |
| TGOLN2     | 2p11.2          | 0.164786 | 0.001228 | 0.003459 |
| VAPB       | 20q13.32        | -0.16478 | 0.001228 | 0.003459 |
| CFAP54     | 12q23.1         | 0.164784 | 0.001228 | 0.003459 |
| ST6GALNAC5 | 1p31.1          | 0.164771 | 0.001229 | 0.003461 |
| HGSNAT     | 8p11.21-p11.1   | 0.164746 | 0.001231 | 0.003467 |
| ZNF768     | 16p11.2         | -0.16463 | 0.001242 | 0.003495 |
| SLC4A5     | 2p13.1          | -0.16463 | 0.001242 | 0.003495 |
| FKBP4      | 12p13.33        | -0.16462 | 0.001242 | 0.003495 |
| ZSCAN2     | 15q25.2         | 0.16462  | 0.001242 | 0.003495 |
| EDNRB      | 13q22.3         | 0.164608 | 0.001243 | 0.003498 |
| PEG10      | 7q21.3          | 0.164549 | 0.001248 | 0.003512 |
| HAVCR2     | 5q33.3          | 0.164546 | 0.001249 | 0.003512 |
| MAPKAPK5   | 12q24.12-q24.13 | -0.16453 | 0.00125  | 0.003514 |
| VSIG4      | Xq12            | 0.164531 | 0.00125  | 0.003515 |
| CA5BP1     | Xp22.2          | -0.16451 | 0.001251 | 0.003518 |
| ZNF775     | 7q36.1          | -0.1645  | 0.001253 | 0.003521 |
| SLC39A5    | 12q13.3         | -0.1645  | 0.001253 | 0.003521 |
| KIF7       | 15q26.1         | 0.164498 | 0.001253 | 0.003521 |
| ZNF551     | 19q13.43        | 0.164461 | 0.001256 | 0.003529 |
| GPR20      | 8q24.3          | 0.164456 | 0.001257 | 0.00353  |
| TCEAL3     | Xq22.2          | 0.164421 | 0.00126  | 0.003538 |
| TTC21A     | 3p22.2          | -0.16441 | 0.001261 | 0.003541 |

|            |                |          |          |          |
|------------|----------------|----------|----------|----------|
| NHLRC1     | 6p22.3         | -0.1644  | 0.001261 | 0.003541 |
| MIS12      | 17p13.2        | 0.164362 | 0.001265 | 0.003551 |
| SULT1C3    | 2q12.3         | 0.164346 | 0.001266 | 0.003554 |
| LCMT2      | 15q15.3        | 0.164343 | 0.001266 | 0.003555 |
| NPY5R      | 4q32.2         | 0.164319 | 0.001269 | 0.003556 |
| EXPH5      | 11q22.3        | 0.164281 | 0.001272 | 0.003569 |
| C9ORF57    | 9q21.13        | -0.16428 | 0.001272 | 0.00357  |
| SPIN3      | Xp11.21        | -0.16422 | 0.001277 | 0.003583 |
| CRYGD      | 2q33.3         | 0.164215 | 0.001278 | 0.003584 |
| PLEKHA2    | 8p11.22        | 0.164212 | 0.001278 | 0.003584 |
| SMS        | Xp22.11        | -0.16419 | 0.00128  | 0.003589 |
| FAM13C     | 10q21.1        | 0.164185 | 0.00128  | 0.00359  |
| BCAR4      | 16p13.13       | -0.16417 | 0.001282 | 0.003592 |
| YWHAEP7    | 17q12          | 0.164171 | 0.001282 | 0.003592 |
| FAM81A     | 15q22.2        | 0.164171 | 0.001282 | 0.003592 |
| ZNF428     | 19q13.31       | -0.16414 | 0.001285 | 0.0036   |
| BOLA1      | 1q21.2         | -0.16413 | 0.001286 | 0.003602 |
| HJURP      | 2q37.1         | -0.1641  | 0.001288 | 0.003608 |
| FAM228B    | 2p23.3         | -0.16401 | 0.001296 | 0.003629 |
| C1GALT1C1  | Xq24           | -0.16401 | 0.001296 | 0.003631 |
| TVP23C     | 17p12          | 0.163979 | 0.001299 | 0.003637 |
| MAB21L4    | 2q37.3         | -0.16395 | 0.001301 | 0.003643 |
| SNORA67    | 17p13.1        | -0.16394 | 0.001303 | 0.003646 |
| SKI        | 1p36.33-p36.32 | 0.163923 | 0.001304 | 0.003649 |
| HINT1      | 5q23.3         | -0.16392 | 0.001304 | 0.003649 |
| TM9SF4     | 20q11.21       | -0.16391 | 0.001305 | 0.003652 |
| CLRN1-AS1  | 3q25.1         | -0.16391 | 0.001305 | 0.003652 |
| CCDC144A   | 17p11.2        | 0.163905 | 0.001306 | 0.003652 |
| GPRASP1    | Xq22.1         | 0.163893 | 0.001307 | 0.003655 |
| GPR68      | 14q32.11       | 0.163884 | 0.001307 | 0.003656 |
| ISG20L2    | 1q23.1         | 0.163847 | 0.001311 | 0.003665 |
| SEZ6L2     | 16p11.2        | 0.163831 | 0.001312 | 0.003668 |
| RNASET2    | 6q27           | -0.16383 | 0.001312 | 0.003668 |
| FOXRED2    | 22q12.3        | -0.16381 | 0.001314 | 0.003673 |
| DCC        | 18q21.2        | 0.163803 | 0.001315 | 0.003674 |
| ITLN1      | 1q23.3         | 0.163788 | 0.001316 | 0.003678 |
| TWINK      | 10q24.31       | -0.16375 | 0.001319 | 0.003686 |
| ISL1       | 5q11.1         | 0.163732 | 0.001321 | 0.003691 |
| LRRC4C     | 11p12          | 0.163708 | 0.001323 | 0.003697 |
| HLA-DPB2   | 6p21.32        | 0.163706 | 0.001324 | 0.003697 |
| C22ORF23   | 22q13.1        | 0.163683 | 0.001326 | 0.003702 |
| EPHA3      | 3p11.1         | 0.163678 | 0.001326 | 0.003703 |
| NDUFAF1    | 15q15.1        | 0.163676 | 0.001326 | 0.003703 |
| CANX       | 5q35.3         | 0.163666 | 0.001327 | 0.003705 |
| SIGLEC1    | 20p13          | 0.163648 | 0.001329 | 0.003709 |
| LINC00244  | 7q36.3         | -0.16365 | 0.001329 | 0.003709 |
| MRPL23-AS1 | 11p15.5        | -0.16364 | 0.00133  | 0.00371  |
| ZNF276     | 16q24.3        | -0.16363 | 0.00133  | 0.003711 |
| DHRS9      | 2q31.1         | 0.163623 | 0.001331 | 0.003713 |
| NPHP1      | 2q13           | -0.1636  | 0.001334 | 0.00372  |
| HERC6      | 4q22.1         | 0.163568 | 0.001336 | 0.003726 |
| AK4        | 1p31.3         | -0.16357 | 0.001337 | 0.003726 |
| ANPEP      | 15q26.1        | 0.163548 | 0.001338 | 0.003731 |
| FGGY       | 1p32.1         | -0.16354 | 0.001338 | 0.003731 |
| AMBP       | 9q32           | -0.16354 | 0.001339 | 0.003731 |
| SIRT5      | 6p23           | -0.16353 | 0.001339 | 0.003733 |
| SBDSP1     | 7q11.23        | -0.16351 | 0.001342 | 0.003739 |
| RUNDC1     | 17q21.31       | 0.163506 | 0.001342 | 0.003739 |

|           |                 |          |          |          |
|-----------|-----------------|----------|----------|----------|
| NOTCH3    | 19p13.12        | 0.163489 | 0.001344 | 0.003743 |
| WDR12     | 2q33.2          | -0.16348 | 0.001344 | 0.003743 |
| ALDH1L2   | 12q23.3         | 0.163444 | 0.001348 | 0.003753 |
| NPM1      | 5q35.1          | -0.16343 | 0.00135  | 0.003758 |
| SLC10A3   | Xq28            | -0.16338 | 0.001353 | 0.003768 |
| POGLUT3   | 11q22.3         | 0.163362 | 0.001355 | 0.003773 |
| KIF1C     | 17p13.2         | 0.163344 | 0.001357 | 0.003777 |
| CALHM5    | 6q22.1          | 0.163312 | 0.00136  | 0.003785 |
| KLK11     | 19q13.41        | 0.163311 | 0.00136  | 0.003785 |
| IL22RA2   | 6q23.3          | 0.163293 | 0.001362 | 0.003789 |
| DHX15     | 4p15.2          | 0.163266 | 0.001365 | 0.003796 |
| CTHRC1    | 8q22.3          | 0.163256 | 0.001365 | 0.003797 |
| LOC283856 | 16q13           | 0.163251 | 0.001366 | 0.003798 |
| COPZ1     | 12q13.13        | -0.16324 | 0.001367 | 0.0038   |
| CRAMP1    | 16p13.3         | 0.163226 | 0.001368 | 0.003803 |
| RAVER1    | 19p13.2         | -0.16323 | 0.001368 | 0.003803 |
| FGF7      | 15q21.2         | 0.163216 | 0.001369 | 0.003805 |
| AHSA1     | 14q24.3         | -0.1632  | 0.001371 | 0.003809 |
| UBXN2B    | 8q12.1          | 0.163196 | 0.001371 | 0.003809 |
| HTR1B     | 6q14.1          | 0.163176 | 0.001373 | 0.003814 |
| TMEM145   | 19q13.2         | -0.16317 | 0.001373 | 0.003814 |
| PNPLA4    | Xp22.31         | -0.16314 | 0.001376 | 0.003822 |
| HDAC4     | 2q37.3          | 0.163127 | 0.001378 | 0.003826 |
| UBALD2    | 17q25.1         | -0.1631  | 0.001381 | 0.003833 |
| SYT7      | 11q12.2         | -0.16308 | 0.001382 | 0.003837 |
| PHF21A    | 11p11.2         | 0.163073 | 0.001383 | 0.003838 |
| CCDC61    | 19q13.32        | -0.16307 | 0.001383 | 0.003839 |
| NKAPL     | 6p22.1          | 0.163052 | 0.001385 | 0.003843 |
| RRP36     | 6p21.1          | -0.16305 | 0.001385 | 0.003843 |
| SNIP1     | 1p34.3          | 0.163046 | 0.001385 | 0.003843 |
| TBX1      | 22q11.21        | 0.163029 | 0.001387 | 0.003847 |
| FAR2      | 12p11.22        | 0.163022 | 0.001388 | 0.003848 |
| PPP2R2A   | 8p21.2          | 0.163016 | 0.001388 | 0.00385  |
| GPR21     | 9q33.2          | 0.163011 | 0.001389 | 0.00385  |
| GZMK      | 5q11.2          | 0.162993 | 0.00139  | 0.003855 |
| FXVD2     | 11q23.3         | -0.16299 | 0.001391 | 0.003856 |
| TPM3      | 1q21.3          | 0.162942 | 0.001395 | 0.003867 |
| CYP11A1   | 15q24.1         | 0.162897 | 0.0014   | 0.003879 |
| ZKSCAN3   | 6p22.1          | 0.162856 | 0.001404 | 0.003889 |
| GNAT3     | 7q21.11         | 0.162854 | 0.001404 | 0.003889 |
| TMEM135   | 11q14.2         | 0.162851 | 0.001404 | 0.003889 |
| TRIM6     | 11p15.4         | 0.162847 | 0.001404 | 0.00389  |
| MCPH1     | 8p23.1          | 0.162824 | 0.001407 | 0.003895 |
| C2CD4A    | 15q22.2         | 0.162822 | 0.001407 | 0.003895 |
| TP73-AS1  | 1p36.32         | 0.162821 | 0.001407 | 0.003895 |
| PPP1CB    | 2p23.2          | 0.162812 | 0.001408 | 0.003897 |
| CD101     | 1p13.1          | 0.162806 | 0.001408 | 0.003898 |
| RTP3      | 3p21.31         | -0.16279 | 0.00141  | 0.003902 |
| IL21R     | 16p12.1         | 0.162779 | 0.001411 | 0.003904 |
| RBP1      | 3q23            | -0.16278 | 0.001411 | 0.003904 |
| PIK3CD    | 1p36.22         | 0.162749 | 0.001414 | 0.003911 |
| HMSD      | 18q22.1         | 0.162729 | 0.001416 | 0.003916 |
| PARD3     | 10p11.22-p11.21 | 0.162654 | 0.001423 | 0.003936 |
| PPP1R32   | 11q12.2         | -0.16263 | 0.001425 | 0.003942 |
| SLFN13    | 17q12           | 0.162579 | 0.001431 | 0.003955 |
| CLDND2    | 19q13.41        | -0.16257 | 0.001431 | 0.003957 |
| KLHL30    | 2q37.3          | 0.162566 | 0.001432 | 0.003958 |
| PLPPR4    | 1p21.3-p21.2    | 0.162532 | 0.001435 | 0.003966 |



|           |              |          |          |          |
|-----------|--------------|----------|----------|----------|
| CLIP3     | 19q13.12     | 0.162526 | 0.001436 | 0.003967 |
| TAS1R1    | 1p36.31      | 0.162443 | 0.001444 | 0.003989 |
| NUP43     | 6q25.1       | -0.16242 | 0.001446 | 0.003994 |
| PLAUR     | 19q13.31     | 0.16241  | 0.001447 | 0.003997 |
| DIRAS1    | 19p13.3      | 0.162395 | 0.001449 | 0.004001 |
| CYP46A1   | 14q32.2      | 0.162394 | 0.001449 | 0.004001 |
| PRSS33    | 16p13.3      | -0.16237 | 0.001451 | 0.004007 |
| CBS       | 21q22.3      | -0.16233 | 0.001455 | 0.004016 |
| ASPHD2    | 22q12.1      | 0.162255 | 0.001463 | 0.004037 |
| HMGCL     | 1p36.11      | -0.16225 | 0.001463 | 0.004038 |
| BHLHA15   | 7q21.3       | 0.162237 | 0.001465 | 0.004041 |
| LINC01555 | 1p22.3       | -0.16223 | 0.001466 | 0.004043 |
| NDUFB5    | 3q26.33      | -0.16222 | 0.001466 | 0.004044 |
| PRELP     | 1q32.1       | 0.162186 | 0.00147  | 0.004054 |
| CLPTM1L   | 5p15.33      | -0.16218 | 0.00147  | 0.004055 |
| CECR7     | 22q11.1      | 0.162163 | 0.001472 | 0.004059 |
| GLP2R     | 17p13.1      | 0.162155 | 0.001473 | 0.004061 |
| KCNN2     | 5q22.3       | 0.162106 | 0.001478 | 0.004074 |
| LGI1      | 10q23.33     | 0.162093 | 0.001479 | 0.004077 |
| ZNF875    | 19q13.12     | -0.16208 | 0.001481 | 0.00408  |
| THBS2     | 6q27         | 0.162063 | 0.001482 | 0.004084 |
| GPR173    | Xp11.22      | 0.16204  | 0.001485 | 0.00409  |
| RFTN2     | 2q33.1       | 0.162017 | 0.001487 | 0.004096 |
| AGBL2     | 11p11.2      | -0.16199 | 0.00149  | 0.004103 |
| TCEAL9    | Xq22.2       | 0.161953 | 0.001493 | 0.004113 |
| MAB21L2   | 4q31.3       | 0.161884 | 0.001501 | 0.004132 |
| HDAC1     | 1p35.2-p35.1 | -0.16188 | 0.001501 | 0.004132 |
| TET3      | 2p13.1       | 0.16185  | 0.001504 | 0.00414  |
| RIMKLB    | 12p13.31     | 0.161847 | 0.001504 | 0.00414  |
| TEX45     | 19p13.2      | -0.16184 | 0.001505 | 0.004142 |
| USP25     | 21q21.1      | 0.161799 | 0.001509 | 0.004153 |
| COL4A2    | 13q34        | 0.16179  | 0.00151  | 0.004155 |
| CRACR2B   | 11p15.5      | -0.16177 | 0.001512 | 0.004159 |
| TECTA     | 11q23.3      | 0.161766 | 0.001513 | 0.004161 |
| JTB       | 1q21.3       | -0.16175 | 0.001514 | 0.004164 |
| SHLD2     | 10q23.2      | 0.161718 | 0.001518 | 0.004173 |
| DUSP6     | 12q21.33     | 0.161681 | 0.001521 | 0.004183 |
| CLIC6     | 21q22.12     | 0.16168  | 0.001522 | 0.004183 |
| LINC00476 | 9q22.32      | -0.16165 | 0.001524 | 0.00419  |
| HAR1B     | 20q13.33     | 0.16162  | 0.001528 | 0.004199 |
| KIAA0753  | 17p13.1      | 0.161617 | 0.001528 | 0.004199 |
| PLRG1     | 4q31.3       | -0.16161 | 0.001529 | 0.004202 |
| HEPACAM2  | 7q21.2       | 0.161605 | 0.001529 | 0.004202 |
| SCARB1    | 12q24.31     | -0.1616  | 0.00153  | 0.004202 |
| MANF      | 3p21.2       | -0.1616  | 0.00153  | 0.004202 |
| ORM2      | 9q32         | -0.16156 | 0.001534 | 0.004212 |
| ANKIB1    | 7q21.2       | 0.16156  | 0.001534 | 0.004212 |
| SNAI1     | 20q13.13     | -0.16148 | 0.001543 | 0.004235 |
| FHL5      | 6q16.1       | 0.161472 | 0.001543 | 0.004236 |
| MSL2      | 3q22.3       | 0.161466 | 0.001544 | 0.004238 |
| KLHL21    | 1p36.31      | -0.16145 | 0.001546 | 0.004242 |
| CDKN2D    | 19p13.2      | -0.16143 | 0.001548 | 0.004248 |
| BACE1     | 11q23.3      | 0.161398 | 0.001551 | 0.004256 |
| ALMS1     | 2p13.1       | 0.16139  | 0.001552 | 0.004257 |
| MAT2A     | 2p11.2       | -0.16139 | 0.001553 | 0.004258 |
| ZNF250    | 8q24.3       | -0.16137 | 0.001554 | 0.004262 |
| NAV2      | 11p15.1      | 0.161348 | 0.001556 | 0.004268 |
| HIST1H4B  | 6p22.2       | -0.16132 | 0.001559 | 0.004274 |

|          |               |          |          |          |
|----------|---------------|----------|----------|----------|
| ZNF174   | 16p13.3       | -0.1613  | 0.001562 | 0.004281 |
| COA8     | 14q32.33      | -0.16129 | 0.001562 | 0.004282 |
| KERA     | 12q21.33      | 0.16127  | 0.001565 | 0.004288 |
| MYOM1    | 18p11.31      | 0.16123  | 0.001569 | 0.004299 |
| SDR16C5  | 8q12.1        | 0.161224 | 0.00157  | 0.004301 |
| SGSH     | 17q25.3       | -0.16122 | 0.00157  | 0.004301 |
| CTSB     | 8p23.1        | 0.161196 | 0.001573 | 0.004307 |
| CPNE5    | 6p21.2        | 0.161191 | 0.001573 | 0.004308 |
| PAQR8    | 6p12.2        | 0.161162 | 0.001576 | 0.004316 |
| KCNB1    | 20q13.13      | 0.161159 | 0.001577 | 0.004317 |
| RPS26P11 | Xq13.1        | -0.1611  | 0.001583 | 0.004333 |
| RECK     | 9p13.3        | 0.16108  | 0.001585 | 0.004339 |
| RGS7     | 1q43 1q23.1   | 0.161061 | 0.001587 | 0.004344 |
| AQP12B   | 2q37.3        | -0.16105 | 0.001589 | 0.004348 |
| INTS14   | 15q22.31      | 0.161042 | 0.001589 | 0.004348 |
| NPIPA1   | 16p13.11      | -0.16103 | 0.001591 | 0.004352 |
| CBWD3    | 9q21.11       | -0.16102 | 0.001592 | 0.004355 |
| CSK      | 15q24.1       | 0.16101  | 0.001593 | 0.004356 |
| FZD2     | 17q21.31      | 0.161008 | 0.001593 | 0.004356 |
| PGBD2    | 1q44          | 0.161005 | 0.001593 | 0.004356 |
| GDI1     | Xq28          | -0.161   | 0.001593 | 0.004356 |
| GTF2H3   | 12q24.31      | 0.16093  | 0.001601 | 0.004377 |
| SRL      | 16p13.3       | 0.160928 | 0.001602 | 0.004377 |
| SERPINF2 | 17p13.3       | -0.16088 | 0.001607 | 0.00439  |
| MEGF8    | 19q13.2       | 0.160842 | 0.001611 | 0.004402 |
| CCNI2    | 5q31.1        | -0.16084 | 0.001612 | 0.004403 |
| MOCS1    | 6p21.2        | -0.16083 | 0.001612 | 0.004404 |
| SUGT1P3  | 13q14.11      | -0.16082 | 0.001613 | 0.004405 |
| ACTR1B   | 2q11.2        | -0.16081 | 0.001614 | 0.004408 |
| ZNF440   | 19p13.2       | 0.160767 | 0.001619 | 0.004422 |
| FAM162A  | 3q21.1        | -0.16074 | 0.001622 | 0.004427 |
| NUP214   | 9q34.13       | 0.160744 | 0.001622 | 0.004427 |
| GDPD5    | 11q13.4-q13.5 | -0.16073 | 0.001623 | 0.00443  |
| PDP2     | 16q22.1       | 0.160732 | 0.001623 | 0.00443  |
| LGALS9C  | 17p11.2       | 0.160725 | 0.001624 | 0.004431 |
| SPI1     | 11p11.2       | 0.1607   | 0.001627 | 0.004438 |
| RGS9     | 17q24.1       | 0.160695 | 0.001627 | 0.004439 |
| GPN2     | 1p36.11       | -0.16064 | 0.001633 | 0.004454 |
| IQC�     | 19p13.11      | 0.160625 | 0.001635 | 0.004459 |
| N4BP2L2  | 13q13.1       | -0.16059 | 0.001639 | 0.004468 |
| MAT2B    | 5q34          | 0.160499 | 0.001649 | 0.004496 |
| PIGY     | 4q22.1        | -0.16042 | 0.001658 | 0.004521 |
| RANBP3   | 19p13.3       | -0.16041 | 0.001659 | 0.004522 |
| LIN54    | 4q21.22       | 0.160346 | 0.001666 | 0.004541 |
| AK7      | 14q32.2       | 0.160327 | 0.001669 | 0.004546 |
| ZFP92    | Xq28          | 0.160326 | 0.001669 | 0.004546 |
| TRAPPC12 | 2p25.3        | -0.16033 | 0.001669 | 0.004546 |
| ZNF843   | 16p11.2       | 0.16032  | 0.001669 | 0.004547 |
| FUNDC1   | Xp11.3        | -0.1603  | 0.001671 | 0.004551 |
| PTPN4    | 2q14.2        | 0.160292 | 0.001672 | 0.004554 |
| RPS29    | 14q21.3       | -0.16027 | 0.001675 | 0.00456  |
| AGAP2    | 12q14.1       | 0.160254 | 0.001677 | 0.004565 |
| APBA2    | 15q13.1       | 0.160212 | 0.001682 | 0.004577 |
| CORO1A   | 16p11.2       | 0.160175 | 0.001686 | 0.004588 |
| RIN2     | 20p11.23      | 0.16017  | 0.001686 | 0.004589 |
| STK31    | 7p15.3        | -0.16015 | 0.001688 | 0.004593 |
| SAYSD1   | 6p21.2        | -0.16015 | 0.001689 | 0.004594 |
| DISP2    | 15q15.1       | 0.160142 | 0.00169  | 0.004595 |

|             |          |          |          |          |
|-------------|----------|----------|----------|----------|
| CR1L        | 1q32.2   | 0.160141 | 0.00169  | 0.004595 |
| ZNF713      | 7p11.2   | 0.160118 | 0.001692 | 0.004602 |
| AQP11       | 11q14.1  | -0.1601  | 0.001694 | 0.004606 |
| EXO5        | 1p34.2   | -0.16009 | 0.001696 | 0.004609 |
| NFE2L3P2    | 17q21.32 | -0.16005 | 0.0017   | 0.00462  |
| ADORA2A-AS1 | 22q11.23 | -0.16003 | 0.001703 | 0.004628 |
| TM7SF3      | 12p11.23 | 0.160024 | 0.001703 | 0.004628 |
| SGCA        | 17q21.33 | 0.159999 | 0.001706 | 0.004636 |
| METTL16     | 17p13.3  | 0.159994 | 0.001707 | 0.004636 |
| LINC01089   | 12q24.31 | -0.15997 | 0.001709 | 0.004642 |
| ARPC1B      | 7q22.1   | -0.15996 | 0.001711 | 0.004646 |
| STAB1       | 3p21.1   | 0.15994  | 0.001713 | 0.004651 |
| EBAG9       | 8q23.2   | -0.15992 | 0.001716 | 0.004658 |
| POU6F1      | 12q13.13 | 0.159906 | 0.001717 | 0.004661 |
| RANBP9      | 6p23     | 0.159877 | 0.00172  | 0.00467  |
| TRIP10      | 19p13.3  | -0.15987 | 0.001721 | 0.004671 |
| GPALPP1     | 13q14.12 | -0.15986 | 0.001722 | 0.004674 |
| PRAM1       | 19p13.2  | 0.159846 | 0.001724 | 0.004677 |
| QSOX2       | 9q34.3   | -0.1598  | 0.001729 | 0.004691 |
| SHD         | 19p13.3  | -0.1598  | 0.00173  | 0.004692 |
| SPINK4      | 9p13.3   | 0.159768 | 0.001733 | 0.0047   |
| UNC13C      | 15q21.3  | 0.159756 | 0.001734 | 0.004703 |
| SRD5A1      | 5p15.31  | -0.1597  | 0.001741 | 0.00472  |
| WHAMMP2     | 15q13.1  | 0.159699 | 0.001741 | 0.00472  |
| COMMD4      | 15q24.2  | -0.15966 | 0.001746 | 0.004733 |
| RUNX3       | 1p36.11  | 0.159646 | 0.001747 | 0.004736 |
| VIM         | 10p13    | 0.159637 | 0.001748 | 0.004738 |
| CORO7       | 16p13.3  | -0.15963 | 0.001749 | 0.00474  |
| INE2        | Xp22.2   | -0.15962 | 0.001751 | 0.004744 |
| KCNE1       | 21q22.12 | 0.159581 | 0.001755 | 0.004754 |
| CNNM1       | 10q24.2  | 0.159562 | 0.001757 | 0.00476  |
| PTPN7       | 1q32.1   | 0.159558 | 0.001758 | 0.00476  |
| SLITRK4     | Xq27.3   | 0.159529 | 0.001761 | 0.004769 |
| PPP2R5D     | 6p21.1   | -0.15952 | 0.001762 | 0.004769 |
| KIF26B      | 1q44     | 0.159525 | 0.001762 | 0.004769 |
| PRRC2B      | 9q34.13  | 0.159523 | 0.001762 | 0.004769 |
| TPTE        | 21p11.2  | 0.15951  | 0.001763 | 0.004773 |
| TBC1D8      | 2q11.2   | 0.159466 | 0.001769 | 0.004786 |
| RTN2        | 19q13.32 | 0.159438 | 0.001772 | 0.004794 |
| CLDN18      | 3q22.3   | 0.159416 | 0.001775 | 0.004801 |
| TXNDC17     | 17p13.1  | -0.15939 | 0.001778 | 0.004809 |
| GDPD3       | 16p11.2  | 0.159383 | 0.001779 | 0.00481  |
| RD3         | 1q32.3   | 0.159373 | 0.00178  | 0.004813 |
| CCL13       | 17q12    | 0.159371 | 0.00178  | 0.004813 |
| NOP14       | 4p16.3   | -0.15937 | 0.001781 | 0.004813 |
| FRZB        | 2q32.1   | 0.15936  | 0.001781 | 0.004815 |
| MAL         | 2q11.1   | 0.159353 | 0.001782 | 0.004817 |
| FGF1        | 5q31.3   | 0.159336 | 0.001784 | 0.004821 |
| LRRC1       | 6p12.1   | 0.159335 | 0.001784 | 0.004821 |
| PCDHB9      | 5q31.3   | 0.159309 | 0.001788 | 0.004829 |
| CFLAR       | 2q33.1   | 0.15928  | 0.001791 | 0.004838 |
| RNPEPL1     | 2q37.3   | -0.15923 | 0.001797 | 0.004853 |
| SPRYD4      | 12q13.3  | -0.15908 | 0.001815 | 0.004901 |
| KDM7A       | 7q34     | 0.159081 | 0.001815 | 0.004901 |
| NDUFA6      | 22q13.2  | -0.15907 | 0.001817 | 0.004906 |
| RASSF1      | 3p21.31  | -0.15902 | 0.001822 | 0.004919 |
| ANKRD36     | 2q11.2   | -0.159   | 0.001825 | 0.004925 |
| LOC400940   | 2p25.2   | 0.158961 | 0.00183  | 0.004938 |

|          |                |          |          |          |
|----------|----------------|----------|----------|----------|
| LOH12CR2 | 12p13.2        | -0.15896 | 0.001831 | 0.004939 |
| TJP3     | 19p13.3        | 0.158956 | 0.001831 | 0.004939 |
| AKR1C3   | 10p15.1        | -0.15895 | 0.001831 | 0.004939 |
| P4HTM    | 3p21.31 3p21.3 | -0.15895 | 0.001831 | 0.004939 |
| ESRP1    | 8q22.1         | 0.158942 | 0.001832 | 0.004942 |
| PARP10   | 8q24.3         | -0.15893 | 0.001834 | 0.004944 |
| IFIT2    | 10q23.31       | 0.15891  | 0.001836 | 0.004951 |
| C4BPA    | 1q32.2         | 0.15887  | 0.001841 | 0.004963 |
| MATN4    | 20q13.12       | -0.15886 | 0.001842 | 0.004965 |
| SCN1B    | 19q13.11       | 0.158862 | 0.001842 | 0.004965 |
| LOXL1    | 15q24.1        | 0.15883  | 0.001846 | 0.004974 |
| OGFOD3   | 17q25.3        | -0.15883 | 0.001846 | 0.004974 |
| PCDH11X  | Xq21.31        | 0.158784 | 0.001852 | 0.004989 |
| MAN2B1   | 19p13.13       | 0.158766 | 0.001854 | 0.004994 |
| REP15    | 12p11.22       | 0.158759 | 0.001855 | 0.004996 |
| GIMAP2   | 7q36.1         | 0.158752 | 0.001856 | 0.004998 |
| VWCE     | 11q12.2        | -0.15872 | 0.00186  | 0.005007 |
| CATSPERB | 14q32.12       | 0.158715 | 0.001861 | 0.005009 |
| BCL9L    | 11q23.3        | 0.158712 | 0.001861 | 0.005009 |
| ARL17A   | 17q21.31       | -0.1587  | 0.001862 | 0.005011 |
| P4HA2    | 5q31.1         | 0.158698 | 0.001863 | 0.005013 |
| METTL24  | 6q21           | 0.158692 | 0.001863 | 0.005014 |
| NANP     | 20p11.21       | -0.15864 | 0.00187  | 0.005029 |
| WDR70    | 5p13.2         | -0.15864 | 0.00187  | 0.005029 |
| TREML1   | 6p21.1         | 0.158641 | 0.00187  | 0.005029 |
| C5ORF34  | 5p12           | -0.15862 | 0.001872 | 0.005035 |
| IGFBP3   | 7p12.3         | 0.158616 | 0.001873 | 0.005036 |
| PRPS2    | Xp22.2         | -0.15858 | 0.001877 | 0.005047 |
| DOK3     | 5q35.3         | 0.158539 | 0.001883 | 0.005061 |
| LYVE1    | 11p15.4        | 0.158534 | 0.001883 | 0.005062 |
| PTCHD3P1 | 10p11.23       | 0.158485 | 0.00189  | 0.005078 |
| CD164L2  | 1p36.11        | -0.15844 | 0.001895 | 0.005093 |
| CD300LF  | 17q25.1        | 0.158396 | 0.001901 | 0.005107 |
| ILDR1    | 3q13.33        | 0.158393 | 0.001901 | 0.005107 |
| SFTA2    | 6p21.33        | -0.15839 | 0.001901 | 0.005107 |
| DIPK2B   | Xp11.3         | 0.158344 | 0.001908 | 0.005123 |
| DCAF10   | 9p13.2         | 0.158299 | 0.001913 | 0.005138 |
| SCARNA6  | 2q37.1         | -0.15829 | 0.001914 | 0.005138 |
| EFHD2    | 1p36.21        | -0.15829 | 0.001914 | 0.005138 |
| NKIRAS2  | 17q21.2        | -0.15827 | 0.001917 | 0.005145 |
| PMS2P2   | 7q11.23        | -0.15827 | 0.001917 | 0.005145 |
| MBLAC1   | 7q22.1         | -0.15826 | 0.001918 | 0.005147 |
| KLRC4    | 12p13.2        | 0.15826  | 0.001918 | 0.005147 |
| ZNF484   | 9q22.31        | 0.158248 | 0.00192  | 0.00515  |
| ZNF121   | 19p13.2        | 0.158245 | 0.00192  | 0.00515  |
| SRRM2    | 16p13.3        | 0.158244 | 0.00192  | 0.00515  |
| ZNF681   | 19p12          | -0.15821 | 0.001925 | 0.005162 |
| SNORD17  | 20p11.23       | -0.15818 | 0.001928 | 0.005171 |
| PRIM2    | 6p11.2         | -0.15818 | 0.001929 | 0.005172 |
| PYHIN1   | 1q23.1         | 0.158173 | 0.001929 | 0.005172 |
| C21ORF58 | 21q22.3        | -0.15816 | 0.001932 | 0.005178 |
| WDR63    | 1p22.3         | 0.158151 | 0.001932 | 0.005179 |
| RTN3     | 11q13.1        | -0.15813 | 0.001935 | 0.005184 |
| CDC40    | 6q21           | 0.158125 | 0.001936 | 0.005186 |
| CD79B    | 17q23.3        | 0.158115 | 0.001937 | 0.005189 |
| TIPRL    | 1q24.2         | 0.158112 | 0.001937 | 0.005189 |
| ANAPC10  | 4q31.21        | -0.1581  | 0.001939 | 0.005192 |
| SMYD3    | 1q44           | -0.158   | 0.001952 | 0.005226 |

|           |              |          |          |          |
|-----------|--------------|----------|----------|----------|
| MLKL      | 16q23.1      | 0.157974 | 0.001955 | 0.005236 |
| LINC00899 | 22q13.31     | -0.15794 | 0.00196  | 0.005246 |
| SCO2      | 22q13.33     | -0.15793 | 0.001961 | 0.00525  |
| OAS2      | 12q24.13     | 0.157919 | 0.001963 | 0.005253 |
| ESYT3     | 3q22.3       | -0.1579  | 0.001965 | 0.005258 |
| ACBD6     | 1q25.2-q25.3 | -0.15788 | 0.001968 | 0.005266 |
| FNBP1     | 9q34.11      | 0.157874 | 0.001969 | 0.005266 |
| ATP13A3   | 3q29         | 0.157873 | 0.001969 | 0.005266 |
| AMACR     | 5p13.2       | -0.15787 | 0.001969 | 0.005267 |
| COL1A1    | 17q21.33     | 0.157862 | 0.00197  | 0.005268 |
| TSPO      | 22q13.2      | -0.15785 | 0.001972 | 0.005272 |
| ARHGAP15  | 2q22.2-q22.3 | 0.157848 | 0.001972 | 0.005272 |
| NKPD1     | 19q13.32     | -0.15784 | 0.001974 | 0.005276 |
| TDRD9     | 14q32.33     | 0.157809 | 0.001977 | 0.005284 |
| PRKRA     | 2q31.2       | -0.15779 | 0.00198  | 0.00529  |
| WDR93     | 15q26.1      | -0.15778 | 0.001981 | 0.005292 |
| KIAA1958  | 9q32         | 0.157771 | 0.001982 | 0.005296 |
| KCND2     | 7q31.31      | 0.157766 | 0.001983 | 0.005297 |
| FCGR3A    | 1q23.3       | 0.157736 | 0.001987 | 0.005307 |
| ZSCAN21   | 7q22.1       | -0.15766 | 0.001997 | 0.005332 |
| IFI27L1   | 14q32.12     | -0.15766 | 0.001997 | 0.005332 |
| DCAF12    | 9p13.3       | 0.157658 | 0.001997 | 0.005332 |
| RYR1      | 19q13.2      | 0.15765  | 0.001998 | 0.005334 |
| CAPN14    | 2p23.1       | 0.15759  | 0.002006 | 0.005355 |
| TSPAN6    | Xq22.1       | -0.15758 | 0.002008 | 0.005359 |
| SIAE      | 11q24.2      | 0.157571 | 0.002009 | 0.005361 |
| VPS37D    | 7q11.23      | -0.15755 | 0.002012 | 0.005368 |
| LARGE1    | 22q12.3      | 0.157529 | 0.002014 | 0.005374 |
| ECM2      | 9q22.31      | 0.157521 | 0.002016 | 0.005376 |
| PRR12     | 19q13.33     | 0.157426 | 0.002028 | 0.00541  |
| BCAS3     | 17q23.2      | 0.157405 | 0.002031 | 0.005417 |
| SLC25A41  | 19p13.3      | -0.15739 | 0.002033 | 0.005422 |
| MARS      | 12q13.3      | -0.15738 | 0.002034 | 0.005423 |
| GJB2      | 13q12.11     | 0.157336 | 0.002041 | 0.005439 |
| TBXAS1    | 7q34         | 0.157334 | 0.002041 | 0.005439 |
| NRSN1     | 6p22.3       | 0.157325 | 0.002042 | 0.005442 |
| UBE4B     | 1p36.22      | 0.157299 | 0.002046 | 0.005451 |
| NAA16     | 13q14.11     | -0.15729 | 0.002046 | 0.005452 |
| HSPH1     | 13q12.3      | -0.15728 | 0.002048 | 0.005455 |
| PLSCR1    | 3q24         | 0.157244 | 0.002053 | 0.005469 |
| HIST1H3B  | 6p22.2       | -0.15722 | 0.002056 | 0.005475 |
| ZSWIM8    | 10q22.2      | 0.157214 | 0.002057 | 0.005478 |
| FRMD4A    | 10p13        | 0.157202 | 0.002059 | 0.005482 |
| CBX2      | 17q25.3      | -0.15719 | 0.002061 | 0.005487 |
| KCNMB1    | 5q35.1       | 0.157177 | 0.002062 | 0.00549  |
| SDF2      | 17q11.2      | -0.15716 | 0.002065 | 0.005496 |
| FN3KRP    | 17q25.3      | -0.15715 | 0.002066 | 0.005496 |
| SLC26A4   | 7q22.3       | 0.157152 | 0.002066 | 0.005496 |
| SLC10A6   | 4q21.3       | 0.157126 | 0.002069 | 0.005505 |
| IL1RN     | 2q14.1       | 0.157116 | 0.002071 | 0.005508 |
| SHC4      | 15q21.1      | 0.15708  | 0.002076 | 0.005521 |
| PCDHGB6   | 5q31.3       | 0.157072 | 0.002077 | 0.005523 |
| HNRNPA2B1 | 7p15.2       | -0.15704 | 0.002081 | 0.005534 |
| LOXL4     | 10q24.2      | 0.157015 | 0.002085 | 0.005543 |
| POLE2     | 14q21.3      | -0.157   | 0.002087 | 0.005548 |
| UBR5      | 8q22.3       | 0.156984 | 0.002089 | 0.005552 |
| RHOH      | 4p14         | 0.156966 | 0.002092 | 0.005558 |
| ARMCX1    | Xq22.1       | 0.156958 | 0.002093 | 0.005561 |

|           |              |          |          |          |
|-----------|--------------|----------|----------|----------|
| IL17RA    | 22q11.1      | 0.156938 | 0.002096 | 0.005567 |
| BTAF1     | 10q23.32     | 0.156896 | 0.002101 | 0.005582 |
| CWC22     | 2q31.3       | 0.156854 | 0.002107 | 0.005597 |
| TGFB1     | 19q13.2      | 0.156841 | 0.002109 | 0.005601 |
| PCDHGA2   | 5q31.3       | 0.156832 | 0.00211  | 0.005603 |
| LINC01512 | 6p21.1       | -0.15683 | 0.002111 | 0.005603 |
| SUMO2     | 17q25.1      | -0.15683 | 0.002111 | 0.005603 |
| ST7       | 7q31.2       | -0.15682 | 0.002112 | 0.005605 |
| FAM171B   | 2q32.1       | 0.156782 | 0.002117 | 0.005619 |
| FGF10     | 5p12         | 0.156781 | 0.002117 | 0.005619 |
| LRRC39    | 1p21.2       | -0.15676 | 0.00212  | 0.005625 |
| FAM171A2  | 17q21.31     | 0.156751 | 0.002122 | 0.005629 |
| HCFC1     | Xq28         | 0.156691 | 0.00213  | 0.00565  |
| CTAG1B    | Xq28         | -0.15669 | 0.00213  | 0.00565  |
| STUM      | 1q42.12      | 0.15668  | 0.002132 | 0.005653 |
| SOCS7     | 17q12        | 0.15666  | 0.002135 | 0.00566  |
| KRT18     | 12q13.13     | -0.15662 | 0.00214  | 0.005673 |
| PDZRN3    | 3p13         | 0.15662  | 0.00214  | 0.005673 |
| FLJ25758  | 19p13.2      | -0.15661 | 0.002142 | 0.005677 |
| MDGA1     | 6p21.2       | 0.156597 | 0.002144 | 0.00568  |
| PTX3      | 3q25.32      | 0.156596 | 0.002144 | 0.00568  |
| C1ORF105  | 1q24.3       | -0.15659 | 0.002145 | 0.005683 |
| CFAP69    | 7q21.13      | -0.15658 | 0.002145 | 0.005683 |
| PTGIS     | 20q13.13     | 0.156583 | 0.002146 | 0.005683 |
| SREBF2    | 22q13.2      | 0.156582 | 0.002146 | 0.005683 |
| DHX8      | 17q21.31     | 0.15658  | 0.002146 | 0.005683 |
| CNIH3     | 1q42.12      | 0.156571 | 0.002147 | 0.005685 |
| ANKRD34A  | 1q21.1       | 0.156566 | 0.002148 | 0.005687 |
| PLD2      | 17p13.2      | 0.156555 | 0.002149 | 0.00569  |
| CCDC71    | 3p21.31      | -0.15654 | 0.002151 | 0.005694 |
| MRPL1     | 4q21.1       | -0.15653 | 0.002153 | 0.005697 |
| ADAMTS13  | 9q34.2       | -0.15651 | 0.002156 | 0.005703 |
| NBDY      | Xp11.21      | -0.15651 | 0.002156 | 0.005704 |
| AHCTF1    | 1q44         | 0.156499 | 0.002158 | 0.005707 |
| ZNF518A   | 10q24.1      | 0.156494 | 0.002158 | 0.005708 |
| GRIK2     | 6q16.3       | 0.156492 | 0.002158 | 0.005708 |
| SLC4A10   | 2q24.2       | 0.156486 | 0.002159 | 0.00571  |
| PTPN5     | 11p15.1      | 0.156474 | 0.002161 | 0.005714 |
| PDK4      | 7q21.3       | 0.156463 | 0.002163 | 0.005717 |
| GHR       | 5p13.1-p12   | 0.156373 | 0.002176 | 0.00575  |
| LDB2      | 4p15.32      | 0.156367 | 0.002176 | 0.005752 |
| HTR1F     | 3p11.2-p11.1 | 0.156347 | 0.002179 | 0.005759 |
| NUDT9     | 4q22.1       | -0.15631 | 0.002185 | 0.005774 |
| KCTD20    | 6p21.31      | 0.156276 | 0.00219  | 0.005785 |
| ZNF141    | 4p16.3       | -0.15626 | 0.002192 | 0.00579  |
| C22ORF39  | 22q11.21     | -0.15626 | 0.002192 | 0.00579  |
| MMP12     | 11q22.2      | 0.156252 | 0.002193 | 0.005791 |
| MVD       | 16q24.2      | -0.15614 | 0.002209 | 0.005832 |
| BTRC      | 10q24.32     | 0.156128 | 0.002211 | 0.005838 |
| MRRF      | 9q33.2       | -0.15609 | 0.002216 | 0.00585  |
| BTBD10    | 11p15.3      | 0.156083 | 0.002218 | 0.005854 |
| STEAP2    | 7q21.13      | 0.155991 | 0.002231 | 0.005889 |
| CHRD1     | Xq23         | 0.155988 | 0.002232 | 0.005889 |
| GBA3      | 4p15.2       | 0.155986 | 0.002232 | 0.005889 |
| ABLIM2    | 4p16.1       | -0.15597 | 0.002235 | 0.005896 |
| ALG1      | 16p13.3      | -0.15595 | 0.002237 | 0.0059   |
| NAPEPLD   | 7q22.1       | 0.155941 | 0.002239 | 0.005904 |
| CCR9      | 3p21.31      | 0.155898 | 0.002245 | 0.005921 |

|           |               |          |          |          |
|-----------|---------------|----------|----------|----------|
| DAZAP2    | 12q13.13      | 0.155868 | 0.00225  | 0.005931 |
| FBLN2     | 3p25.1        | 0.155854 | 0.002252 | 0.005936 |
| PROB1     | 5q31.2        | 0.155848 | 0.002253 | 0.005938 |
| MPPE1     | 18p11.21      | 0.155845 | 0.002253 | 0.005938 |
| LHPP      | 10q26.13      | -0.15584 | 0.002254 | 0.005939 |
| BCL6      | 3q27.3        | 0.155817 | 0.002257 | 0.005947 |
| TNNT1     | 19q13.42      | 0.155792 | 0.002261 | 0.005956 |
| SGCE      | 7q21.3        | 0.155775 | 0.002264 | 0.005963 |
| ATAD3C    | 1p36.33       | -0.15577 | 0.002265 | 0.005966 |
| FES       | 15q26.1       | 0.155754 | 0.002267 | 0.005969 |
| DRAIC     | 15q23         | -0.15573 | 0.002271 | 0.005979 |
| FOXF1     | 16q24.1       | 0.155696 | 0.002275 | 0.00599  |
| IKBIP     | 12q23.1       | 0.155678 | 0.002278 | 0.005997 |
| ASB11     | Xp22.2        | 0.155673 | 0.002279 | 0.005998 |
| KRTAP12-1 | 21q22.3       | -0.15566 | 0.002281 | 0.006002 |
| KRT40     | 17q21.2       | -0.15565 | 0.002282 | 0.006005 |
| ZCCHC9    | 5q14.1        | -0.15562 | 0.002287 | 0.006016 |
| CSNK1E    | 22q13.1       | -0.15559 | 0.002291 | 0.006025 |
| NUDCD3    | 7p13          | -0.15559 | 0.002291 | 0.006025 |
| FCN1      | 9q34.3        | 0.155577 | 0.002293 | 0.006031 |
| CHRD      | 3q27.1        | 0.155528 | 0.002301 | 0.00605  |
| CCNO      | 5q11.2        | -0.15551 | 0.002303 | 0.006055 |
| MDH1      | 2p15          | -0.15551 | 0.002304 | 0.006056 |
| RAPGEF3   | 12q13.11      | 0.155503 | 0.002305 | 0.006058 |
| MRPS14    | 1q25.1        | -0.15546 | 0.002311 | 0.006075 |
| PRR15     | 7p14.3        | -0.15546 | 0.002312 | 0.006075 |
| KCNA1     | 12p13.32      | 0.155413 | 0.002318 | 0.006091 |
| SPATA17   | 1q41          | -0.15541 | 0.002319 | 0.006093 |
| GPM6A     | 4q34.2        | 0.155403 | 0.00232  | 0.006094 |
| CHGB      | 20p12.3       | 0.155387 | 0.002322 | 0.0061   |
| SLC7A14   | 3q26.2        | 0.155385 | 0.002323 | 0.0061   |
| TAS2R3    | 7q34          | 0.155368 | 0.002325 | 0.006106 |
| PARP1     | 1q42.12       | 0.155355 | 0.002327 | 0.00611  |
| C18ORF21  | 18q12.2       | -0.15533 | 0.002331 | 0.006118 |
| STIM1     | 11p15.4       | 0.155319 | 0.002333 | 0.006123 |
| SMPD1     | 11p15.4       | 0.155306 | 0.002335 | 0.006128 |
|           | 9-Mar 12q14.1 | -0.15529 | 0.002337 | 0.006132 |
| MAPKAP1   | 9q33.3        | -0.15527 | 0.002341 | 0.006141 |
| HLA-DPA1  | 6p21.32       | 0.155256 | 0.002343 | 0.006145 |
| STAG3L2   | 7q11.23       | -0.15526 | 0.002343 | 0.006145 |
| FUCA2     | 6q24.2        | -0.15525 | 0.002344 | 0.006147 |
| SAP130    | 2q14.3        | 0.155195 | 0.002352 | 0.006168 |
| RNF115    | 1q21.1        | 0.155184 | 0.002354 | 0.006171 |
| SENP2     | 3q27.2        | 0.155176 | 0.002355 | 0.006174 |
| DNER      | 2q36.3        | 0.155168 | 0.002356 | 0.006176 |
| C17ORF49  | 17p13.1       | -0.15513 | 0.002361 | 0.006189 |
| PNPLA1    | 6p21.31       | -0.15511 | 0.002365 | 0.006198 |
| POLM      | 7p13          | -0.1551  | 0.002366 | 0.006199 |
| DRC1      | 2p23.3        | -0.1551  | 0.002366 | 0.006199 |
| RUBCN     | 3q29          | 0.155098 | 0.002367 | 0.006201 |
| ADAMTS1   | 21q21.3       | 0.155086 | 0.002369 | 0.006205 |
| TENM3-AS1 | 4q34.3        | 0.155074 | 0.002371 | 0.006209 |
| KIN       | 10p14         | -0.15507 | 0.002372 | 0.006211 |
| BAHCC1    | 17q25.3       | 0.155039 | 0.002376 | 0.006221 |
| LAMA1     | 18p11.31      | 0.155024 | 0.002379 | 0.006227 |
| KLHL12    | 1q32.1        | 0.155021 | 0.002379 | 0.006227 |
| IHH       | 2q35          | -0.15502 | 0.00238  | 0.006228 |
| IFITM5    | 11p15.5       | -0.15497 | 0.002387 | 0.006247 |

|          |              |          |          |          |
|----------|--------------|----------|----------|----------|
| ZNF143   | 11p15.4      | 0.154966 | 0.002388 | 0.006247 |
| TM2D3    | 15q26.3      | 0.154921 | 0.002395 | 0.006265 |
| CLECL1   | 12p13.31     | 0.154909 | 0.002397 | 0.006269 |
| HNRNPLL  | 2p22.1       | 0.154907 | 0.002397 | 0.006269 |
| UBE2QL1  | 5p15.31      | 0.154897 | 0.002398 | 0.006272 |
| CISD2    | 4q24         | -0.15489 | 0.002399 | 0.006274 |
| GNG5     | 1p22.3       | -0.15484 | 0.002407 | 0.006293 |
| CNTLN    | 9p22.2       | 0.154839 | 0.002408 | 0.006294 |
| LUM      | 12q21.33     | 0.154837 | 0.002408 | 0.006294 |
| ELN      | 7q11.23      | 0.154797 | 0.002414 | 0.00631  |
| LHX9     | 1q31.3       | 0.154792 | 0.002415 | 0.006311 |
| CLEC9A   | 12p13.2      | 0.154787 | 0.002416 | 0.006312 |
| ZNF587   | 19q13.43     | 0.154748 | 0.002422 | 0.006328 |
| ZNFX1    | 20q13.13     | 0.154678 | 0.002433 | 0.006356 |
| HTATIP2  | 11p15.1      | -0.15467 | 0.002434 | 0.006358 |
| DBP      | 19q13.33     | -0.15467 | 0.002435 | 0.006359 |
| SCIN     | 7p21.3       | 0.154662 | 0.002436 | 0.00636  |
| GLRX2    | 1q31.2       | -0.15462 | 0.002443 | 0.006379 |
| ARFGEF1  | 8q13.2       | 0.154613 | 0.002444 | 0.006379 |
| WDSUB1   | 2q24.2       | -0.15459 | 0.002448 | 0.006389 |
| PAOX     | 10q26.3      | -0.15457 | 0.00245  | 0.006394 |
| ADAMTS16 | 5p15.32      | 0.154535 | 0.002456 | 0.00641  |
| CNTN3    | 3p12.3       | 0.154518 | 0.002459 | 0.006416 |
| CYP3A5   | 7q22.1       | 0.154515 | 0.00246  | 0.006416 |
| FLT4     | 5q35.3       | 0.154502 | 0.002462 | 0.00642  |
| NTRK1    | 1q23.1       | 0.154501 | 0.002462 | 0.00642  |
| RAB9B    | Xq22.2       | 0.154499 | 0.002462 | 0.00642  |
| CYSRT1   | 9q34.3       | -0.15445 | 0.002469 | 0.006439 |
| IDH3B    | 20p13        | -0.15444 | 0.002472 | 0.006443 |
| C21ORF91 | 21q21.1      | 0.154436 | 0.002472 | 0.006444 |
| RIC8B    | 12q23.3      | 0.154432 | 0.002473 | 0.006445 |
| KBTBD11  | 8p23.3       | 0.15437  | 0.002483 | 0.006471 |
| HHEX     | 10q23.33     | 0.154335 | 0.002489 | 0.006485 |
| ADCY3    | 2p23.3       | -0.15433 | 0.00249  | 0.006486 |
| SEMA3E   | 7q21.11      | 0.154309 | 0.002493 | 0.006494 |
| MYBPHL   | 1p13.3       | -0.15425 | 0.002503 | 0.00652  |
| LYRM9    | 17q11.2      | -0.15424 | 0.002505 | 0.006524 |
| AKR1A1   | 1p34.1       | -0.15421 | 0.002508 | 0.006532 |
| CRLS1    | 20p12.3      | -0.15417 | 0.002515 | 0.006549 |
| CASP10   | 2q33.1       | 0.154166 | 0.002516 | 0.006551 |
| ADARB2   | 10p15.3      | 0.154157 | 0.002518 | 0.006554 |
| FABP6    | 5q33.3       | -0.15413 | 0.002522 | 0.006565 |
| MEOX1    | 17q21.31     | 0.154114 | 0.002525 | 0.006571 |
| PRPH     | 12q13.12     | 0.154089 | 0.002529 | 0.006581 |
| FCAR     | 19q13.42     | 0.154077 | 0.002531 | 0.006585 |
| KDSR     | 18q21.33     | 0.154067 | 0.002533 | 0.006587 |
| P2RY4    | Xq13.1       | 0.154067 | 0.002533 | 0.006587 |
| ZNF799   | 19p13.2      | -0.15407 | 0.002533 | 0.006587 |
| NBPF14   | 1q21.2       | 0.154001 | 0.002544 | 0.006615 |
| GLI1     | 12q13.3      | 0.15398  | 0.002547 | 0.006622 |
| BMT2     | 7q31.1       | 0.15398  | 0.002547 | 0.006622 |
| SWT1     | 1q25.3       | 0.153975 | 0.002548 | 0.006623 |
| ZNF830   | 17q12        | -0.15394 | 0.002554 | 0.006637 |
| CASZ1    | 1p36.22      | 0.153929 | 0.002556 | 0.006641 |
| PCDH15   | 10q21.1      | 0.153907 | 0.00256  | 0.00665  |
| ZNF638   | 2p13.3-p13.2 | 0.1539   | 0.002561 | 0.006652 |
| SLC37A1  | 21q22.3      | 0.153899 | 0.002561 | 0.006652 |
| SLAIN1   | 13q22.3      | 0.153895 | 0.002561 | 0.006653 |



|           |          |          |          |          |
|-----------|----------|----------|----------|----------|
| ZDHHC3    | 3p21.31  | 0.153891 | 0.002562 | 0.006653 |
| TMEM8B    | 9p13.3   | -0.15389 | 0.002563 | 0.006655 |
| TBC1D2    | 9q22.33  | 0.153864 | 0.002567 | 0.006663 |
| HEBP2     | 6q24.1   | -0.15386 | 0.002567 | 0.006663 |
| SIGLEC15  | 18q12.3  | 0.153855 | 0.002568 | 0.006666 |
| COLCA1    | 11q23.1  | 0.153843 | 0.00257  | 0.00667  |
| CLDN12    | 7q21.13  | 0.153816 | 0.002575 | 0.006681 |
| KYNU      | 2q22.2   | 0.153789 | 0.002579 | 0.006692 |
| POLE3     | 9q32     | -0.15376 | 0.002584 | 0.006702 |
| LINC00523 | 14q32.2  | 0.153752 | 0.002586 | 0.006706 |
| ECT2L     | 6q24.1   | -0.15375 | 0.002586 | 0.006706 |
| KCNIP1    | 5q35.1   | 0.15367  | 0.002599 | 0.006741 |
| BCL2L13   | 22q11.21 | 0.153652 | 0.002602 | 0.006748 |
| KLHL7     | 7p15.3   | -0.15365 | 0.002603 | 0.006748 |
| SMC6      | 2p24.2   | 0.153613 | 0.002609 | 0.006763 |
| CHRD12    | 11q13.4  | 0.15358  | 0.002615 | 0.006777 |
| SCP2      | 1p32.3   | 0.153514 | 0.002626 | 0.006805 |
| FBXL16    | 16p13.3  | 0.153499 | 0.002629 | 0.006811 |
| ANP32B    | 9q22.33  | -0.15348 | 0.002633 | 0.006821 |
| ALX1      | 12q21.31 | -0.15346 | 0.002635 | 0.006825 |
| PILRA     | 7q22.1   | 0.153441 | 0.002639 | 0.006833 |
| C1RL-AS1  | 12p13.31 | 0.153441 | 0.002639 | 0.006833 |
| ABCC3     | 17q21.33 | 0.153439 | 0.002639 | 0.006833 |
| ERP44     | 9q31.1   | -0.15343 | 0.002641 | 0.006838 |
| SETMAR    | 3p26.1   | -0.1534  | 0.002645 | 0.006848 |
| ZNF780A   | 19q13.2  | 0.153366 | 0.002652 | 0.006863 |
| FAM83H    | 8q24.3   | -0.15336 | 0.002652 | 0.006863 |
| OAS3      | 12q24.13 | 0.153363 | 0.002652 | 0.006863 |
| PMP2      | 8q21.13  | 0.153362 | 0.002652 | 0.006863 |
| AVPR1A    | 12q14.2  | 0.153357 | 0.002653 | 0.006864 |
| TNFAIP8L3 | 15q21.2  | 0.153337 | 0.002657 | 0.006872 |
| GGA1      | 22q13.1  | -0.15331 | 0.002661 | 0.006882 |
| GUSBP1    | 5p14.3   | -0.15329 | 0.002665 | 0.006893 |
| FAM124B   | 2q36.2   | 0.153266 | 0.002669 | 0.006901 |
| DAP3      | 1q22     | -0.15325 | 0.002672 | 0.006908 |
| TMTC4     | 13q32.3  | -0.15325 | 0.002672 | 0.006908 |
| AXIN1     | 16p13.3  | -0.15321 | 0.002679 | 0.006924 |
| HRCT1     | 9p13.3   | -0.15319 | 0.002682 | 0.006931 |
| C9ORF78   | 9q34.11  | -0.15318 | 0.002684 | 0.006936 |
| GNMT      | 6p21.1   | -0.15317 | 0.002685 | 0.006937 |
| ZNF429    | 19p12    | 0.153165 | 0.002686 | 0.00694  |
| ZNF541    | 19q13.33 | -0.15312 | 0.002694 | 0.006959 |
| TRUB1     | 10q25.3  | 0.153118 | 0.002695 | 0.00696  |
| SETD5     | 3p25.3   | 0.153089 | 0.0027   | 0.006972 |
| SMIM30    | 7q31.1   | -0.15304 | 0.002709 | 0.006996 |
| SUSD3     | 9q22.31  | -0.15303 | 0.00271  | 0.006997 |
| CD300E    | 17q25.1  | 0.153018 | 0.002712 | 0.007002 |
| SPAG4     | 20q11.22 | -0.15302 | 0.002713 | 0.007002 |
| HAUS8     | 19p13.11 | -0.15301 | 0.002713 | 0.007003 |
| GRIN3A    | 9q31.1   | 0.153002 | 0.002715 | 0.007007 |
| SLC26A1   | 4p16.3   | -0.15299 | 0.002718 | 0.007012 |
| BHMT2     | 5q14.1   | 0.152967 | 0.002721 | 0.007021 |
| KPNA3     | 13q14.2  | -0.15296 | 0.002723 | 0.007024 |
| TRPC6     | 11q22.1  | 0.152955 | 0.002723 | 0.007024 |
| INSYN1    | 15q24.1  | 0.152952 | 0.002724 | 0.007025 |
| ABHD4     | 14q11.2  | 0.15293  | 0.002728 | 0.007034 |
| ANXA10    | 4q32.3   | 0.152924 | 0.002729 | 0.007036 |
| CACYBP    | 1q25.1   | -0.15292 | 0.00273  | 0.007037 |

|           |              |          |          |          |
|-----------|--------------|----------|----------|----------|
| ADAMTSL5  | 19p13.3      | -0.15288 | 0.002736 | 0.007053 |
| ATP1B3    | 3q23         | -0.15287 | 0.002739 | 0.007058 |
| KIAA0825  | 5q15         | 0.152795 | 0.002752 | 0.007091 |
| SLC1A2    | 11p13        | 0.152784 | 0.002754 | 0.007096 |
| ARMT1     | 6q25.1       | 0.152762 | 0.002758 | 0.007105 |
| CD300LG   | 17q21.31     | 0.152756 | 0.002759 | 0.007107 |
| PRPF38A   | 1p32.3       | -0.15275 | 0.002761 | 0.00711  |
| PJVK      | 2q31.2       | -0.15274 | 0.002763 | 0.007114 |
| ZNRF2P1   | 7p14.3       | 0.152717 | 0.002766 | 0.007122 |
| DHX37     | 12q24.31     | -0.15271 | 0.002768 | 0.007126 |
| TACR1     | 2p12         | 0.152698 | 0.002769 | 0.007129 |
| MAP3K11   | 11q13.1      | -0.15267 | 0.002774 | 0.007139 |
| GRIP2     | 3p25.1       | 0.15266  | 0.002776 | 0.007144 |
| C1ORF56   | 1q21.3       | -0.15263 | 0.002782 | 0.007159 |
| LOC728554 | 5q35.3       | -0.15262 | 0.002784 | 0.007162 |
| KIAA0556  | 16p12.1      | 0.152612 | 0.002785 | 0.007163 |
| KIF5C     | 2q23.1-q23.2 | 0.152612 | 0.002785 | 0.007163 |
| COQ8B     | 19q13.2      | -0.15256 | 0.002794 | 0.007187 |
| FGR       | 1p35.3       | 0.152551 | 0.002796 | 0.00719  |
| FAM172A   | 5q15         | 0.152548 | 0.002796 | 0.00719  |
| RETSAT    | 2p11.2       | 0.15254  | 0.002798 | 0.007193 |
| ADGRL4    | 1p31.1       | 0.152477 | 0.002809 | 0.007222 |
| NDOR1     | 9q34.3       | -0.15247 | 0.002811 | 0.007225 |
| PROX1     | 1q32.3       | 0.152461 | 0.002812 | 0.007227 |
| UMODL1    | 21q22.3      | -0.15246 | 0.002813 | 0.007229 |
| DRGX      | 10q11.23     | 0.152446 | 0.002815 | 0.007233 |
| IGSF21    | 1p36.13      | 0.152419 | 0.00282  | 0.007244 |
| ABCG8     | 2p21         | 0.152415 | 0.002821 | 0.007245 |
| COX10     | 17p12        | 0.152404 | 0.002823 | 0.007249 |
| RGS22     | 8q22.2       | 0.152366 | 0.00283  | 0.007267 |
| VMAC      | 19p13.3      | -0.15235 | 0.002832 | 0.007272 |
| RNU11     | 1p35.3       | -0.15235 | 0.002833 | 0.007272 |
| TMBIM1    | 2q35         | 0.152322 | 0.002838 | 0.007284 |
| C22ORF24  | 22q12.3      | 0.152312 | 0.00284  | 0.007288 |
| RTP2      | 3q27.3       | 0.152274 | 0.002847 | 0.007305 |
| ZNF175    | 19q13.41     | 0.152258 | 0.00285  | 0.007312 |
| ACSL1     | 4q35.1       | 0.152216 | 0.002857 | 0.007331 |
| GALNS     | 16q24.3      | -0.15221 | 0.002858 | 0.007332 |
| ANAPC4    | 4p15.2       | -0.1522  | 0.002861 | 0.007339 |
| FCRL1     | 1q23.1       | 0.152176 | 0.002865 | 0.007347 |
| CD38      | 4p15.32      | 0.152139 | 0.002872 | 0.007363 |
| SMAP2     | 1p34.2       | 0.152065 | 0.002885 | 0.007398 |
| HMGB2     | 4q34.1       | -0.15206 | 0.002886 | 0.0074   |
| ZNF137P   | 19q13.41     | -0.15204 | 0.00289  | 0.007407 |
| TRIM5     | 11p15.4      | 0.152    | 0.002898 | 0.007426 |
| CMTM8     | 3p22.3       | -0.15198 | 0.002902 | 0.007437 |
| PER1      | 17p13.1      | 0.151956 | 0.002906 | 0.007446 |
| CADM2     | 3p12.1       | 0.151954 | 0.002906 | 0.007446 |
| TMEM229A  | 7q31.32      | 0.151938 | 0.002909 | 0.007453 |
| TMEM176A  | 7q36.1       | -0.15192 | 0.002913 | 0.007461 |
| TGFB1I1   | 16p11.2      | 0.151874 | 0.002921 | 0.007481 |
| HEATR1    | 1q43         | 0.15187  | 0.002922 | 0.007482 |
| CDR1      | Xq27.1       | 0.151849 | 0.002926 | 0.007492 |
| ABI3      | 17q21.32     | 0.151812 | 0.002933 | 0.007509 |
| KIF18B    | 17q21.31     | -0.15177 | 0.00294  | 0.007526 |
| LMCD1     | 3p25.3       | 0.151773 | 0.00294  | 0.007526 |
| BMF       | 15q15.1      | 0.151738 | 0.002947 | 0.007542 |
| HOXA3     | 7p15.2       | -0.15173 | 0.002948 | 0.007542 |

|             |                 |          |          |          |
|-------------|-----------------|----------|----------|----------|
| OR7E156P    | 13q21.31        | -0.1517  | 0.002954 | 0.007558 |
| FLRT1       | 11q13.1         | -0.15168 | 0.002959 | 0.007569 |
| ULBP2       | 6q25.1          | 0.151671 | 0.00296  | 0.00757  |
| IFT27       | 22q12.3         | -0.15164 | 0.002965 | 0.007583 |
| NUTM1       | 15q14           | 0.151618 | 0.00297  | 0.007594 |
| ZCWPW2      | 3p24.1          | 0.151615 | 0.00297  | 0.007595 |
| NT5M        | 17p11.2         | -0.15161 | 0.002971 | 0.007595 |
| CNOT8       | 5q33.2          | 0.151586 | 0.002976 | 0.007607 |
| LDLRAD3     | 11p13           | -0.15158 | 0.002977 | 0.007608 |
| ENO1        | 1p36.23         | -0.15156 | 0.00298  | 0.007616 |
| TCEAL5      | Xq22.1          | 0.151556 | 0.002982 | 0.007619 |
| CREB3L4     | 1q21.3          | 0.151506 | 0.002992 | 0.007643 |
| APCDD1      | 18p11.22        | -0.1515  | 0.002992 | 0.007643 |
| ZNF747      | 16p11.2         | 0.151484 | 0.002996 | 0.007652 |
| ADH1C       | 4q23            | 0.151479 | 0.002997 | 0.007653 |
| FAM83C      | 20q11.22        | -0.15147 | 0.002998 | 0.007655 |
| IL2RB       | 22q12.3         | 0.151447 | 0.003003 | 0.007667 |
| TBPL1       | 6q23.2          | -0.15143 | 0.003007 | 0.007675 |
| MFSD4A-AS1  | 1q32.1          | 0.151411 | 0.00301  | 0.007682 |
| KIAA1324    | 1p13.3          | 0.15141  | 0.00301  | 0.007682 |
| NP1PB5      | 16p12.2         | -0.15139 | 0.003013 | 0.007689 |
| AQP9        | 15q21.3         | 0.151364 | 0.003019 | 0.007703 |
| KRT35       | 17q21.2         | -0.15131 | 0.003029 | 0.007727 |
| ELF2        | 4q31.1          | 0.151312 | 0.003029 | 0.007727 |
| PSMD6       | 3p14.1          | -0.15131 | 0.00303  | 0.007728 |
| ADAMTS9     | 3p14.1          | 0.151294 | 0.003033 | 0.007734 |
| SPATA46     | 1q23.3          | 0.151292 | 0.003033 | 0.007734 |
| CYP26B1     | 2p13.2          | 0.151284 | 0.003035 | 0.007737 |
| GNAI3       | 1p13.3          | 0.151261 | 0.003039 | 0.007748 |
| MBD2        | 18q21.2         | 0.151257 | 0.00304  | 0.007748 |
| CRKL        | 22q11.21        | 0.151255 | 0.00304  | 0.007748 |
| TBKBP1      | 17q21.32        | -0.15124 | 0.003044 | 0.007758 |
| KIAA0087    | 7p15.2          | 0.151195 | 0.003052 | 0.007776 |
| BRD2        | 6p21.32         | 0.151188 | 0.003053 | 0.007779 |
| IVD         | 15q15.1         | 0.151185 | 0.003054 | 0.00778  |
| HLA-F-AS1   | 6p22.1          | -0.15115 | 0.003062 | 0.007798 |
| UBE2L3      | 22q11.21        | -0.15114 | 0.003063 | 0.007801 |
| TAF2        | 12q14.1         | 0.151122 | 0.003066 | 0.007808 |
| PLEKHA3     | 2q31.2          | 0.151101 | 0.003071 | 0.007818 |
| SAXO2       | 15q25.2         | 0.151068 | 0.003077 | 0.007833 |
| MFGE8       | 15q26.1         | 0.151067 | 0.003077 | 0.007833 |
| IFT46       | 11q23.3         | -0.15105 | 0.003081 | 0.00784  |
| NLRP1       | 17p13.2         | 0.151023 | 0.003086 | 0.007853 |
| NAPA        | 19q13.32-q13.33 | -0.15102 | 0.003087 | 0.007855 |
| CCL15-CCL14 | 17q12           | -0.15101 | 0.003088 | 0.007856 |
| APOA2       | 1q23.3          | -0.15095 | 0.003101 | 0.007889 |
| NTM         | 11q25           | 0.150871 | 0.003116 | 0.007926 |
| CRTAM       | 11q24.1         | 0.150861 | 0.003118 | 0.00793  |
| FIZ1        | 19q13.42        | -0.15085 | 0.00312  | 0.007932 |
| CHST11      | 12q23.3         | 0.150852 | 0.00312  | 0.007932 |
| HBEGF       | 5q31.3          | 0.150852 | 0.00312  | 0.007932 |
| MAST1       | 19p13.13        | -0.15084 | 0.003122 | 0.007935 |
| FAM86JP     | 3q21.2          | -0.15084 | 0.003122 | 0.007935 |
| FBLN7       | 2q13-q14.1      | 0.150819 | 0.003127 | 0.007946 |
| CLEC5A      | 7q34            | 0.150809 | 0.003129 | 0.00795  |
| LAMB2       | 3p21.31         | 0.1508   | 0.003131 | 0.007953 |
| FAM110A     | 20p13           | -0.15077 | 0.003136 | 0.007965 |
| CHST2       | 3q24            | 0.150771 | 0.003136 | 0.007966 |

|           |          |          |          |          |
|-----------|----------|----------|----------|----------|
| TMEM128   | 4p16.3   | -0.15075 | 0.00314  | 0.007973 |
| ORMDL3    | 17q21.1  | -0.15075 | 0.00314  | 0.007973 |
| FOXP2     | 7q31.1   | 0.15075  | 0.003141 | 0.007973 |
| ADGRD2    | 9q33.3   | -0.15075 | 0.003141 | 0.007973 |
| GNA15     | 19p13.3  | 0.150743 | 0.003142 | 0.007976 |
| GPR171    | 3q25.1   | 0.150704 | 0.00315  | 0.007994 |
| TMEM190   | 19q13.42 | -0.15067 | 0.003156 | 0.008009 |
| OR10A4    | 11p15.4  | -0.15066 | 0.003159 | 0.008016 |
| PARP4     | 13q12.12 | 0.150655 | 0.00316  | 0.008017 |
| DGKI      | 7q33     | 0.150621 | 0.003167 | 0.008033 |
| SETDB2    | 13q14.2  | -0.15062 | 0.003168 | 0.008034 |
| CD80      | 3q13.33  | 0.150615 | 0.003168 | 0.008034 |
| ERBB3     | 12q13.2  | 0.150609 | 0.003169 | 0.008036 |
| ADPGK     | 15q24.1  | 0.150568 | 0.003178 | 0.008056 |
| SLC38A4   | 12q13.11 | 0.150561 | 0.003179 | 0.008059 |
| INKA2     | 1p13.2   | 0.15053  | 0.003185 | 0.008074 |
| ENTPD1    | 10q24.1  | 0.150502 | 0.003191 | 0.008087 |
| FBXO22    | 15q24.2  | 0.150488 | 0.003194 | 0.008093 |
| CLDN22    | 4q35.1   | -0.15048 | 0.003196 | 0.008097 |
| SLC6A15   | 12q21.31 | 0.150479 | 0.003196 | 0.008097 |
| VPS37A    | 8p22     | 0.150469 | 0.003198 | 0.0081   |
| MT3       | 16q13    | -0.15046 | 0.003199 | 0.008102 |
| CSTF2     | Xq22.1   | -0.15046 | 0.003201 | 0.008106 |
| SHC1      | 1q21.3   | 0.150438 | 0.003204 | 0.008114 |
| MLANA     | 9p24.1   | 0.150419 | 0.003208 | 0.008122 |
| UNKL      | 16p13.3  | -0.1504  | 0.003211 | 0.00813  |
| OXCT2     | 1p34.2   | -0.1504  | 0.003213 | 0.008132 |
| AKAP7     | 6q23.2   | 0.150388 | 0.003214 | 0.008135 |
| LRFN5     | 14q21.1  | 0.150379 | 0.003216 | 0.008139 |
| CD14      | 5q31.3   | 0.150364 | 0.003219 | 0.008146 |
| ART1      | 11p15.4  | 0.150335 | 0.003225 | 0.00816  |
| EZH2      | 7q36.1   | -0.15032 | 0.003227 | 0.008164 |
| CDC25A    | 3p21.31  | -0.15028 | 0.003238 | 0.008189 |
| BLM       | 15q26.1  | 0.150263 | 0.00324  | 0.008194 |
| PCDH12    | 5q31.3   | 0.150263 | 0.00324  | 0.008194 |
| WDR92     | 2p14     | -0.15026 | 0.003241 | 0.008195 |
| C11ORF95  | 11q13.1  | -0.15025 | 0.003243 | 0.008199 |
| ZNF362    | 1p35.1   | 0.150245 | 0.003244 | 0.0082   |
| TENM1     | Xq25     | 0.150194 | 0.003255 | 0.008226 |
| TSPAN17   | 5q35.2   | -0.15019 | 0.003256 | 0.008227 |
| GOLGA8G   | 15q13.1  | -0.15018 | 0.003257 | 0.008231 |
| HIST1H2BI | 6p22.2   | -0.15016 | 0.003262 | 0.008241 |
| GUCY1A2   | 11q22.3  | 0.150157 | 0.003262 | 0.008241 |
| CCDC8     | 19q13.32 | 0.150151 | 0.003264 | 0.008243 |
| SLC7A5P1  | 16p11.2  | -0.15015 | 0.003264 | 0.008243 |
| SORBS2    | 4q35.1   | 0.15013  | 0.003268 | 0.008252 |
| PCDHGB5   | 5q31.3   | 0.150108 | 0.003273 | 0.008263 |
| KIAA1210  | Xq24     | 0.150081 | 0.003278 | 0.008276 |
| PNPLA8    | 7q31.1   | 0.150065 | 0.003282 | 0.008283 |
| C1QTNF3   | 5p13.2   | 0.150061 | 0.003282 | 0.008284 |
| LINC00173 | 12q24.22 | -0.15006 | 0.003284 | 0.008287 |
| RPS17     | 15q25.2  | -0.15003 | 0.00329  | 0.008301 |
| C9ORF153  | 9q21.33  | -0.15002 | 0.00329  | 0.008301 |
| LINC02085 | 3q12.3   | 0.149993 | 0.003297 | 0.008316 |
| ARL3      | 10q24.32 | -0.14993 | 0.00331  | 0.008348 |
| ELK1      | Xp11.23  | -0.14992 | 0.003311 | 0.008351 |
| ITIH5     | 10p14    | 0.149863 | 0.003324 | 0.008383 |
| ATP10B    | 5q34     | 0.149841 | 0.003329 | 0.008393 |

|              |                    |          |          |          |
|--------------|--------------------|----------|----------|----------|
| EPPK1        | 8q24.3             | 0.149822 | 0.003333 | 0.008403 |
| ASMT         | Xp22.33 and Yp11.2 | -0.14981 | 0.003335 | 0.008408 |
| MTHFR        | 1p36.22            | 0.149717 | 0.003355 | 0.008457 |
| MAP4K1       | 19q13.2            | 0.149706 | 0.003358 | 0.008462 |
| PARD6G       | 18q23              | 0.149689 | 0.003361 | 0.00847  |
| NUSAP1       | 15q15.1            | 0.149683 | 0.003363 | 0.008472 |
| RAI2         | Xp22.13            | 0.14967  | 0.003365 | 0.008478 |
| NIM1K        | 5p12               | 0.149658 | 0.003368 | 0.008483 |
| GJD3         | 17q21.2            | 0.149651 | 0.00337  | 0.008486 |
| CHMP3        | 2p11.2             | 0.149613 | 0.003378 | 0.008506 |
| CDH3         | 16q22.1            | -0.14961 | 0.003378 | 0.008506 |
| SIRPD        | 20p13              | 0.149591 | 0.003383 | 0.008516 |
| PLA2G3       | 22q12.2            | 0.149565 | 0.003388 | 0.008529 |
| RHOT1        | 17q11.2            | -0.14956 | 0.00339  | 0.008532 |
| FAM185A      | 7q22.1             | -0.14955 | 0.003391 | 0.008533 |
| SNORA21      | 17q12              | -0.14955 | 0.003391 | 0.008533 |
| APEH         | 3p21.31            | -0.14954 | 0.003393 | 0.008536 |
| LILRB5       | 19q13.42           | 0.149541 | 0.003393 | 0.008536 |
| MED12        | Xq13.1             | 0.149533 | 0.003395 | 0.00854  |
| CSKMT        | 11q12.3            | -0.14953 | 0.003397 | 0.008543 |
| EPHB6        | 7q34               | 0.149518 | 0.003398 | 0.008546 |
| NCS1         | 9q34.11            | -0.14943 | 0.003418 | 0.008594 |
| PLEKHG4B     | 5p15.33            | 0.149425 | 0.003418 | 0.008594 |
| DCN          | 12q21.33           | 0.149421 | 0.003419 | 0.008596 |
| LRRC37A16P   | 17q24.2            | 0.149378 | 0.003429 | 0.008618 |
| S100A3       | 1q21.3             | -0.14934 | 0.003437 | 0.008638 |
| PRSS45P      | 3p21.31            | -0.14933 | 0.00344  | 0.008644 |
| DTL          | 1q32.3             | 0.14931  | 0.003444 | 0.008652 |
| DNAH5        | 5p15.2             | 0.149302 | 0.003445 | 0.008655 |
| AGT          | 1q42.2             | -0.14928 | 0.003449 | 0.008664 |
| CAMK2A       | 5q32               | 0.149274 | 0.003451 | 0.008668 |
| USP27X       | Xp11.23            | -0.14911 | 0.003489 | 0.008761 |
| ATP6AP1      | Xq28               | -0.14908 | 0.003495 | 0.008775 |
| MEF2B        | 19p13.11           | -0.14905 | 0.003502 | 0.008792 |
| ADGRG2       | Xp22.13            | 0.149037 | 0.003504 | 0.008795 |
| LOC100130872 | 4p16.3             | -0.14904 | 0.003504 | 0.008795 |
| DDX54        | 12q24.13           | -0.14903 | 0.003506 | 0.008798 |
| GALR1        | 18q23              | 0.149027 | 0.003506 | 0.008798 |
| SYVN1        | 11q13.1            | -0.14902 | 0.003507 | 0.0088   |
| SLC22A1      | 6q25.3             | -0.14902 | 0.003509 | 0.008802 |
| THEMIS       | 6q22.33            | 0.149012 | 0.003509 | 0.008803 |
| SLC18A3      | 10q11.23           | 0.149001 | 0.003512 | 0.008808 |
| TCL1A        | 14q32.13           | 0.149    | 0.003512 | 0.008808 |
| HIST1H3E     | 6p22.2             | 0.148996 | 0.003513 | 0.008809 |
| MPND         | 19p13.3            | -0.14896 | 0.003521 | 0.008827 |
| PSME1        | 14q12              | -0.14895 | 0.003524 | 0.008833 |
| ZNRF1        | 16q23.1            | -0.14895 | 0.003524 | 0.008833 |
| GID4         | 17p11.2 17p11.2    | 0.148875 | 0.00354  | 0.008872 |
| GBP2         | 1p22.2             | 0.148858 | 0.003544 | 0.008881 |
| LARP4        | 12q13.12           | 0.148829 | 0.003551 | 0.008896 |
| ALPK3        | 15q25.3            | 0.148825 | 0.003551 | 0.008897 |
| FHAD1        | 1p36.21            | 0.14881  | 0.003555 | 0.008905 |
| LSAMP        | 3q13.31            | 0.148805 | 0.003556 | 0.008906 |
| CLCA2        | 1p22.3             | 0.148803 | 0.003556 | 0.008906 |
| VPS41        | 7p14.1             | 0.148797 | 0.003558 | 0.008908 |
| HEXA-AS1     | 15q23              | 0.148794 | 0.003558 | 0.008908 |
| BMP8A        | 1p34.3             | 0.148794 | 0.003558 | 0.008908 |
| PROSER2      | 10p14              | -0.14877 | 0.003564 | 0.00892  |

|           |          |          |          |          |
|-----------|----------|----------|----------|----------|
| EPOR      | 19p13.2  | 0.148758 | 0.003567 | 0.008926 |
| RNF165    | 18q21.1  | 0.148754 | 0.003567 | 0.008927 |
| CDO1      | 5q22.3   | 0.148701 | 0.00358  | 0.008956 |
| CORIN     | 4p12     | 0.148694 | 0.003581 | 0.008959 |
| IER5      | 1q25.3   | 0.148692 | 0.003582 | 0.008959 |
| ZNF727    | 7q11.21  | 0.148684 | 0.003583 | 0.008963 |
| GRIPAP1   | Xp11.23  | -0.14868 | 0.003584 | 0.008963 |
| NECTIN3   | 3q13.13  | 0.148679 | 0.003585 | 0.008963 |
| OLR1      | 12p13.2  | 0.148591 | 0.003604 | 0.009012 |
| BBS12     | 4q27     | 0.148585 | 0.003606 | 0.009015 |
| ZNF180    | 19q13.31 | 0.148541 | 0.003616 | 0.009038 |
| SLCO2B1   | 11q13.4  | 0.14853  | 0.003618 | 0.009044 |
| ANKS1B    | 12q23.1  | 0.148528 | 0.003619 | 0.009044 |
| C2ORF69   | 2q33.1   | 0.148492 | 0.003627 | 0.009063 |
| MORC2-AS1 | 22q12.2  | -0.14849 | 0.003629 | 0.009066 |
| SMIM7     | 19p13.11 | -0.14848 | 0.003631 | 0.00907  |
| CD48      | 1q23.3   | 0.14845  | 0.003637 | 0.009084 |
| PRX       | 19q13.2  | 0.148446 | 0.003638 | 0.009085 |
| TSPEAR    | 21q22.3  | -0.14842 | 0.003645 | 0.009101 |
| GRIP1     | 12q14.3  | 0.148397 | 0.003649 | 0.009111 |
| SEPTIN8   | 5q31.1   | 0.148373 | 0.003655 | 0.009124 |
| NIBAN3    | 19p13.11 | 0.148367 | 0.003656 | 0.009126 |
| CCL22     | 16q21    | 0.148359 | 0.003658 | 0.009129 |
| CCDC103   | 17q21.31 | -0.14836 | 0.003658 | 0.009129 |
| NLGN2     | 17p13.1  | 0.148331 | 0.003664 | 0.009144 |
| MYH10     | 17p13.1  | 0.148327 | 0.003665 | 0.009145 |
| ACAA2     | 18q21.1  | 0.148324 | 0.003666 | 0.009145 |
| ANKRD37   | 4q35.1   | 0.148278 | 0.003677 | 0.009171 |
| SPP1      | 4q22.1   | 0.148227 | 0.003689 | 0.009199 |
| C18ORF32  | 18q21.1  | 0.148226 | 0.003689 | 0.009199 |
| ZNF507    | 19q13.11 | 0.148191 | 0.003697 | 0.009218 |
| LPAR4     | Xq21.1   | 0.14818  | 0.0037   | 0.009223 |
| BMS1      | 10q11.21 | 0.148176 | 0.0037   | 0.009224 |
| LEPR      | 1p31.3   | 0.148157 | 0.003705 | 0.009235 |
| FKBP14    | 7p14.3   | 0.148151 | 0.003706 | 0.009237 |
| GATC      | 12q24.31 | -0.14814 | 0.003709 | 0.009242 |
| DNAJB2    | 2q35     | -0.14812 | 0.003713 | 0.009251 |
| STAT2     | 12q13.3  | 0.148119 | 0.003714 | 0.009252 |
| TTPAL     | 20q13.12 | -0.14812 | 0.003714 | 0.009252 |
| DNAJC9    | 10q22.2  | -0.14811 | 0.003716 | 0.009254 |
| JAG2      | 14q32.33 | -0.1481  | 0.003717 | 0.009258 |
| MBIP      | 14q13.3  | 0.148094 | 0.00372  | 0.009262 |
| SLC16A9   | 10q21.2  | 0.148086 | 0.003722 | 0.009266 |
| IL1B      | 2q14.1   | 0.14803  | 0.003735 | 0.009297 |
| TMEM51    | 1p36.21  | -0.14799 | 0.003745 | 0.00932  |
| PGAM4     | Xq21.1   | 0.147971 | 0.003749 | 0.00933  |
| CRYBA4    | 22q12.1  | -0.14796 | 0.00375  | 0.009333 |
| OLFML2B   | 1q23.3   | 0.147952 | 0.003753 | 0.009338 |
| BBS5      | 2q31.1   | -0.14795 | 0.003754 | 0.009338 |
| MPHOSPH10 | 2p13.3   | -0.14794 | 0.003755 | 0.009342 |
| CCDC113   | 16q21    | -0.14793 | 0.003759 | 0.009349 |
| TUG1      | 22q12.2  | 0.147871 | 0.003773 | 0.009382 |
| PIGX      | 3q29     | -0.14786 | 0.003775 | 0.009388 |
| LINC00698 | 3p14.2   | -0.14785 | 0.003777 | 0.009391 |
| NAIF1     | 9q34.11  | -0.14781 | 0.003788 | 0.009417 |
| TRRAP     | 7q22.1   | 0.147796 | 0.00379  | 0.009421 |
| SLC4A11   | 20p13    | 0.147795 | 0.003791 | 0.009421 |
| SCARA3    | 8p21.1   | 0.147783 | 0.003793 | 0.009426 |

|           |          |          |          |          |
|-----------|----------|----------|----------|----------|
| PAPOLG    | 2p16.1   | 0.147783 | 0.003794 | 0.009426 |
| ZNF81     | Xp11.23  | 0.147779 | 0.003795 | 0.009427 |
| ZNF17     | 19q13.43 | 0.147776 | 0.003795 | 0.009428 |
| APOA1     | 11q23.3  | -0.14777 | 0.003797 | 0.009431 |
| HMX3      | 10q26.13 | 0.147766 | 0.003798 | 0.009432 |
| ADAMTS8   | 11q24.3  | 0.147736 | 0.003805 | 0.009448 |
| ZIC4      | 3q24     | -0.14771 | 0.00381  | 0.009461 |
| HDC       | 15q21.2  | 0.147705 | 0.003812 | 0.009464 |
| CLEC12A   | 12p13.31 | 0.147693 | 0.003815 | 0.00947  |
| CYP27C1   | 2q14.3   | 0.147687 | 0.003817 | 0.009473 |
| CAMK2N1   | 1p36.12  | -0.14768 | 0.003819 | 0.009478 |
| SNX27     | 1q21.3   | 0.147663 | 0.003822 | 0.009484 |
| CCNK      | 14q32.2  | 0.147643 | 0.003827 | 0.009496 |
| CPT1B     | 22q13.33 | -0.14762 | 0.003832 | 0.009507 |
| BAIAP2    | 17q25.3  | -0.14762 | 0.003833 | 0.009508 |
| SNORA65   | 9q33.3   | -0.14756 | 0.003847 | 0.009542 |
| PHACTR1   | 6p24.1   | 0.147508 | 0.00386  | 0.009572 |
| ZNF446    | 19q13.43 | -0.1475  | 0.003862 | 0.009576 |
| HMGB3     | Xq28     | -0.1475  | 0.003863 | 0.009577 |
| PRUNE1    | 1q21.3   | 0.147487 | 0.003865 | 0.009581 |
| C20ORF203 | 20q11.21 | -0.14747 | 0.003869 | 0.009589 |
| SFR1      | 10q25.1  | -0.14746 | 0.003871 | 0.009593 |
| PLEC      | 8q24.3   | 0.147454 | 0.003873 | 0.009597 |
| LSM12     | 17q21.31 | -0.14742 | 0.00388  | 0.009614 |
| MAP7D2    | Xp22.12  | -0.14742 | 0.003882 | 0.009616 |
| EMCN      | 4q24     | 0.147415 | 0.003883 | 0.009617 |
| LINGO4    | 1q21.3   | 0.14741  | 0.003884 | 0.009619 |
| ABCA4     | 1p22.1   | 0.1474   | 0.003886 | 0.009624 |
| SKAP2     | 7p15.2   | 0.147398 | 0.003887 | 0.009624 |
| ALAS1     | 3p21.2   | 0.14739  | 0.003889 | 0.009628 |
| RETREG3   | 17q21.2  | -0.14737 | 0.003895 | 0.00964  |
| ZDHHC6    | 10q25.2  | -0.14737 | 0.003895 | 0.00964  |
| AHCYL1    | 1p13.3   | 0.147362 | 0.003896 | 0.009641 |
| PAX2      | 10q24.31 | 0.147314 | 0.003907 | 0.009669 |
| ASB16-AS1 | 17q21.31 | -0.14728 | 0.003916 | 0.009691 |
| WNT10A    | 2q35     | -0.14723 | 0.003928 | 0.009718 |
| BPNT1     | 1q41     | 0.147226 | 0.003929 | 0.009719 |
| CADM1     | 11q23.3  | 0.147197 | 0.003936 | 0.009736 |
| TMEM185A  | Xq28     | -0.14719 | 0.003938 | 0.00974  |
| TBC1D9    | 4q31.21  | 0.147169 | 0.003943 | 0.00975  |
| ADGRL1    | 19p13.12 | -0.14716 | 0.003944 | 0.009752 |
| RTL5      | Xq13.1   | 0.147159 | 0.003946 | 0.009754 |
| EPHB2     | 1p36.12  | -0.14715 | 0.003948 | 0.009758 |
| HIC1      | 17p13.3  | 0.14715  | 0.003948 | 0.009758 |
| CCDC87    | 11q13.2  | 0.147143 | 0.003949 | 0.00976  |
| ANAPC16   | 10q22.1  | -0.14711 | 0.003958 | 0.00978  |
| FKBP5     | 6p21.31  | 0.147066 | 0.003969 | 0.009806 |
| SPTB      | 14q23.3  | 0.147054 | 0.003972 | 0.009811 |
| ZNF136    | 19p13.2  | 0.147024 | 0.003979 | 0.009829 |
| DRD2      | 11q23.2  | -0.14702 | 0.00398  | 0.009829 |
| WNT9B     | 17q21.32 | 0.147008 | 0.003983 | 0.009836 |
| CERS4     | 19p13.2  | -0.147   | 0.003986 | 0.009841 |
| TLE1      | 9q21.32  | 0.146992 | 0.003987 | 0.009844 |
| SNORA11   | Xp11.21  | -0.14698 | 0.003991 | 0.009852 |
| CHRM5     | 15q14    | 0.14697  | 0.003993 | 0.009855 |
| TEKT4     | 2q11.1   | -0.14696 | 0.003996 | 0.009862 |
| TRIM40    | 6p22.1   | 0.146927 | 0.004004 | 0.009879 |
| SPATA32   | 17q21.31 | 0.146891 | 0.004013 | 0.0099   |

|           |               |          |          |          |
|-----------|---------------|----------|----------|----------|
| C11ORF80  | 11q13.2       | -0.14688 | 0.004014 | 0.009904 |
| SH3KBP1   | Xp22.12       | 0.146876 | 0.004016 | 0.009907 |
| TMEM54    | 1p35.1        | -0.14687 | 0.004018 | 0.009911 |
| LMLN      | 3q29          | 0.146848 | 0.004023 | 0.009922 |
| LOC284009 | 17p13.3       | -0.14685 | 0.004024 | 0.009922 |
| SPTSSB    | 3q26.1        | 0.146814 | 0.004032 | 0.009941 |
| FCER1G    | 1q23.3        | 0.146796 | 0.004037 | 0.009951 |
| SLC16A4   | 1p13.3        | 0.14678  | 0.004041 | 0.00996  |
| IL13RA1   | Xq24          | 0.146747 | 0.004049 | 0.009979 |
| PROM1     | 4p15.32       | 0.146738 | 0.004051 | 0.009984 |
| DDX19A    | 16q22.1       | -0.14672 | 0.004055 | 0.009992 |
| PRAG1     | 8p23.1        | 0.146704 | 0.00406  | 0.010002 |
| DDX31     | 9q34.13       | -0.14665 | 0.004073 | 0.010033 |
| MBOAT4    | 8p12          | 0.146566 | 0.004095 | 0.010086 |
| CYP4F29P  | 21q11.2       | -0.14652 | 0.004108 | 0.010117 |
| TPPP3     | 16q22.1       | -0.14651 | 0.004109 | 0.010118 |
| BRD3      | 9q34.2        | 0.146492 | 0.004114 | 0.01013  |
| RGS1      | 1q31.2        | 0.146481 | 0.004117 | 0.010135 |
| LRSAM1    | 9q33.3-q34.11 | -0.14645 | 0.004125 | 0.010154 |
| MADCAM1   | 19p13.3       | 0.146432 | 0.00413  | 0.010164 |
| BZW1      | 2q33.1        | 0.146355 | 0.00415  | 0.010212 |
| GPHN      | 14q23.3-q24.1 | 0.146344 | 0.004152 | 0.010218 |
| MASP1     | 3q27.3        | 0.146308 | 0.004162 | 0.010239 |
| NFASC     | 1q32.1        | 0.146299 | 0.004164 | 0.010244 |
| FAM8A1    | 6p22.3        | 0.146289 | 0.004167 | 0.010249 |
| SLC6A3    | 5p15.33       | -0.14624 | 0.004178 | 0.010276 |
| NR1D2     | 3p24.2        | 0.146237 | 0.00418  | 0.01028  |
| NTRK3     | 15q25.3       | 0.146226 | 0.004183 | 0.010284 |
| SMARCC1   | 3p21.31       | 0.146225 | 0.004183 | 0.010284 |
| RAMAC     | 15q25.2       | 0.146225 | 0.004183 | 0.010284 |
| STK38L    | 12p11.23      | 0.146219 | 0.004185 | 0.010287 |
| OR1J2     | 9q33.2        | -0.14622 | 0.004186 | 0.010287 |
| PEAK3     | 19p13.3       | 0.146204 | 0.004189 | 0.010293 |
| KBTBD3    | 11q22.3       | -0.1462  | 0.00419  | 0.010295 |
| FITM2     | 20q13.12      | -0.14619 | 0.004193 | 0.010302 |
| NFU1      | 2p13.3        | -0.14614 | 0.004205 | 0.010329 |
| PCSK2     | 20p12.1       | 0.146125 | 0.00421  | 0.010339 |
| FAM222B   | 17q11.2       | 0.146113 | 0.004213 | 0.010346 |
| FAIM      | 3q22.3        | 0.1461   | 0.004216 | 0.010353 |
| FUT2      | 19q13.33      | 0.146064 | 0.004226 | 0.010375 |
| VDAC1     | 5q31.1        | -0.14606 | 0.004227 | 0.010378 |
| UBXN6     | 19p13.3       | -0.146   | 0.004243 | 0.010414 |
| USP13     | 3q26.33       | 0.145985 | 0.004247 | 0.010422 |
| F2RL1     | 5q13.3        | 0.145971 | 0.00425  | 0.01043  |
| ATN1      | 12p13.31      | 0.145964 | 0.004252 | 0.010434 |
| PCYT1A    | 3q29          | 0.14592  | 0.004264 | 0.010461 |
| HSD17B2   | 16q23.3       | 0.145909 | 0.004267 | 0.010466 |
| EIF5A     | 17p13.1       | -0.14591 | 0.004267 | 0.010466 |
| OLMALINC  | 10q24.31      | -0.14585 | 0.004282 | 0.010502 |
| MAGEL2    | 15q11.2       | 0.145846 | 0.004284 | 0.010504 |
| LILRA6    | 19q13.42      | 0.145812 | 0.004293 | 0.010526 |
| LARP4B    | 10p15.3       | 0.145791 | 0.004298 | 0.010538 |
| CEACAM1   | 19q13.2       | 0.145783 | 0.0043   | 0.010542 |
| VPS37B    | 12q24.31      | 0.145781 | 0.004301 | 0.010542 |
| STAMBP    | 2p13.1        | -0.14576 | 0.004306 | 0.010553 |
| MYCT1     | 6q25.2        | 0.145743 | 0.004311 | 0.010564 |
| HIST1H2AL | 6p22.1        | -0.14574 | 0.004312 | 0.010565 |
| C2ORF73   | 2p16.2        | 0.145731 | 0.004314 | 0.010569 |



|              |               |          |          |          |
|--------------|---------------|----------|----------|----------|
| AS3MT        | 10q24.32      | -0.14573 | 0.004316 | 0.010572 |
| LILRA4       | 19q13.42      | 0.14572  | 0.004317 | 0.010574 |
| AHNAK2       | 14q32.33      | 0.145711 | 0.00432  | 0.010579 |
| DHTKD1       | 10p14         | 0.145709 | 0.00432  | 0.010579 |
| USF2         | 19q13.12      | -0.14569 | 0.004326 | 0.010591 |
| NONO         | Xq13.1        | -0.14568 | 0.004329 | 0.010596 |
| LMAN2L       | 2q11.2        | -0.14566 | 0.004333 | 0.010605 |
| DDIAS        | 11q14.1       | -0.14564 | 0.004338 | 0.010618 |
| DZIP1L       | 3q22.3        | 0.145628 | 0.004342 | 0.010626 |
| MIR503HG     | Xq26.3        | -0.1456  | 0.004349 | 0.010642 |
| PRORS1P      | 2p16.1        | -0.14559 | 0.004352 | 0.010646 |
| PABPC1       | 8q22.3        | -0.14559 | 0.004352 | 0.010646 |
| PSPC1        | 13q12.11      | -0.14559 | 0.004353 | 0.010647 |
| EPHA7        | 6q16.1        | 0.145582 | 0.004355 | 0.01065  |
| ADGRE5       | 19p13.12      | 0.145575 | 0.004356 | 0.010653 |
| GABARAPL2    | 16q23.1       | -0.14552 | 0.004373 | 0.010691 |
| UBD          | 6p22.1        | -0.14551 | 0.004374 | 0.010693 |
| PHF19        | 9q33.2        | -0.1455  | 0.004377 | 0.0107   |
| GUCA1B       | 6p21.1        | -0.14549 | 0.004378 | 0.010701 |
| GNLY         | 2p11.2        | -0.14548 | 0.004383 | 0.010712 |
| LOC100128164 | 3q26.2        | 0.145464 | 0.004387 | 0.010718 |
| SPATA5       | 4q28.1        | 0.145464 | 0.004387 | 0.010718 |
| PPP2R2B      | 5q32          | 0.145453 | 0.00439  | 0.010724 |
| CDCA8        | 1p34.3        | -0.14544 | 0.004394 | 0.010732 |
| NKX2-3       | 10q24.2       | 0.145429 | 0.004396 | 0.010737 |
| SEPHS2       | 16p11.2       | -0.14542 | 0.0044   | 0.010745 |
| NDUFS2       | 1q23.3        | 0.145394 | 0.004406 | 0.010757 |
| PDE4C        | 19p13.11      | 0.145394 | 0.004406 | 0.010757 |
| SLC25A32     | 8q22.3        | -0.14539 | 0.004407 | 0.010758 |
| L1TD1        | 1p31.3        | 0.14537  | 0.004413 | 0.01077  |
| SEC22A       | 3q21.1        | -0.14537 | 0.004413 | 0.01077  |
| HLA-J        | 6p22.1        | -0.14536 | 0.004415 | 0.010773 |
| FBXL22       | 15q22.31      | 0.145343 | 0.00442  | 0.010784 |
| OSBPL9       | 1p32.3        | 0.145342 | 0.00442  | 0.010784 |
| VSTM2A       | 7p11.2        | 0.145326 | 0.004425 | 0.010793 |
| TTC33        | 5p13.1        | 0.145272 | 0.00444  | 0.010828 |
| BIRC3        | 11q22.2       | 0.14526  | 0.004443 | 0.010835 |
| TRIOBP       | 22q13.1       | 0.14525  | 0.004446 | 0.01084  |
| TSPAN33      | 7q32.1        | -0.14522 | 0.004454 | 0.010859 |
| DPH3P1       | 20q13.33      | -0.14522 | 0.004455 | 0.010861 |
| ABCB9        | 12q24.31      | -0.1452  | 0.00446  | 0.01087  |
| SLC35D2      | 9q22.32       | -0.1452  | 0.00446  | 0.01087  |
| CRYBB1       | 22q12.1       | 0.145185 | 0.004464 | 0.010878 |
| SEPTIN6      | Xq24          | 0.14518  | 0.004465 | 0.01088  |
| TPTE2P3      | 13q14.3       | -0.14518 | 0.004466 | 0.010881 |
| ATCAY        | 19p13.3       | 0.145167 | 0.004468 | 0.010886 |
| FAM98C       | 19q13.2       | -0.14516 | 0.004471 | 0.010891 |
| ARL1         | 12q23.2       | 0.145154 | 0.004472 | 0.010892 |
| WDHD1        | 14q22.2-q22.3 | 0.145144 | 0.004475 | 0.010897 |
| DHFR2        | 3q11.2        | 0.145132 | 0.004478 | 0.010904 |
| TULP1        | 6p21.31       | -0.14513 | 0.00448  | 0.010906 |
| IMPDH2       | 3p21.31       | -0.14513 | 0.00448  | 0.010906 |
| DBNDD1       | 16q24.3       | -0.14512 | 0.004483 | 0.010911 |
| ZNF419       | 19q13.43      | -0.14511 | 0.004483 | 0.010912 |
| RAF1         | 3p25.2        | 0.145107 | 0.004485 | 0.010914 |
| HENMT1       | 1p13.3        | -0.14508 | 0.004493 | 0.010931 |
| PASK         | 2q37.3        | -0.14504 | 0.004503 | 0.010956 |
| GJA9         | 1p34.3        | 0.145033 | 0.004506 | 0.010961 |

|           |            |          |          |          |
|-----------|------------|----------|----------|----------|
| GOLGA8IP  | 15q11.2    | 0.145021 | 0.004509 | 0.010965 |
| CDIP1     | 16p13.3    | -0.14502 | 0.004509 | 0.010965 |
| KRTAP3-1  | 17q21.2    | -0.14502 | 0.004509 | 0.010965 |
| DPPA4     | 3q13.13    | 0.145004 | 0.004514 | 0.010975 |
| TET1      | 10q21.3    | 0.144985 | 0.004519 | 0.010987 |
| SNX25     | 4q35.1     | 0.144978 | 0.004521 | 0.01099  |
| ATPSCKMT  | 5p15.2     | -0.14496 | 0.004526 | 0.011    |
| TMEM45B   | 11q24.3    | -0.14493 | 0.004535 | 0.01102  |
| SPRED3    | 19q13.2    | 0.144923 | 0.004537 | 0.011023 |
| CHRNA6    | 8p11.21    | 0.144923 | 0.004537 | 0.011023 |
| ZWINT     | 10q21.1    | -0.14492 | 0.004538 | 0.011025 |
| MTA2      | 11q12.3    | -0.14491 | 0.00454  | 0.011028 |
| SNX13     | 7p21.1     | 0.144893 | 0.004545 | 0.011039 |
| GAP43     | 3q13.31    | 0.144888 | 0.004546 | 0.011041 |
| CHRNA6    | 2q37.1     | -0.14488 | 0.004548 | 0.011042 |
| MTMR2     | 11q21      | 0.14487  | 0.004552 | 0.01105  |
| PVR       | 19q13.31   | -0.14487 | 0.004552 | 0.011051 |
| CACNA1A   | 19p13.13   | 0.144861 | 0.004554 | 0.011054 |
| PBLD      | 10q21.3    | 0.144853 | 0.004556 | 0.011058 |
| SFXN1     | 5q35.2     | 0.144851 | 0.004557 | 0.011058 |
| SIRT2     | 19q13.2    | -0.14484 | 0.00456  | 0.011065 |
| SYBU      | 8q23.2     | -0.14482 | 0.004566 | 0.011077 |
| TMEM106B  | 7p21.3     | 0.144801 | 0.004571 | 0.011089 |
| CCNB3     | Xp11.22    | 0.144755 | 0.004584 | 0.011119 |
| LARP1B    | 4q28.2     | 0.144745 | 0.004587 | 0.011124 |
| HIP1      | 7q11.23    | 0.144735 | 0.00459  | 0.01113  |
| SLC22A3   | 6q25.3     | -0.14471 | 0.004598 | 0.011148 |
| VPS11     | 11q23.3    | -0.1447  | 0.004599 | 0.011148 |
| NR2F1-AS1 | 5q15       | 0.144679 | 0.004606 | 0.011164 |
| RNF17     | 13q12.12   | 0.144659 | 0.004612 | 0.011177 |
| SBNO2     | 19p13.3    | 0.14455  | 0.004643 | 0.011252 |
| LIME1     | 20q13.33   | -0.14455 | 0.004644 | 0.011253 |
| ZNF189    | 9q31.1     | 0.144544 | 0.004645 | 0.011253 |
| QRSL1     | 6q21       | -0.14454 | 0.004646 | 0.011256 |
| TMEM218   | 11q24.2    | -0.14453 | 0.004648 | 0.011258 |
| FBXO46    | 19q13.32   | -0.14452 | 0.00465  | 0.011262 |
| CCL19     | 9p13.3     | 0.144523 | 0.004651 | 0.011262 |
| DAO       | 12q24.11   | 0.144479 | 0.004663 | 0.011291 |
| EPHA8     | 1p36.12    | -0.14442 | 0.004679 | 0.011328 |
| RGS14     | 5q35.3     | -0.14441 | 0.004684 | 0.01134  |
| MARVELD2  | 5q13.2     | 0.144397 | 0.004687 | 0.011345 |
| HDGFL3    | 15q25.2    | 0.144386 | 0.00469  | 0.011351 |
| FOSL1     | 11q13.1    | -0.14434 | 0.004702 | 0.011379 |
| TUBA4B    | 2q35       | -0.14434 | 0.004705 | 0.011383 |
| FAF1      | 1p32.3     | -0.14432 | 0.004709 | 0.011393 |
| ULBP3     | 6q25.1     | 0.144303 | 0.004714 | 0.011403 |
| CCSAP     | 1q42.13    | 0.144272 | 0.004723 | 0.011424 |
| UBE2O     | 17q25.1    | -0.14423 | 0.004735 | 0.011451 |
| LCA5      | 6q14.1     | 0.144223 | 0.004738 | 0.011456 |
| ANKRD9    | 14q32.31   | -0.1442  | 0.004745 | 0.011473 |
| SNORA74B  | 5q35.1     | -0.14416 | 0.004757 | 0.011501 |
| CCDC7     | 10p11.22   | 0.144149 | 0.004759 | 0.011504 |
| INAFM1    | 19q13.32   | -0.14413 | 0.004765 | 0.011516 |
| NFE2L3    | 7p15.2     | -0.14411 | 0.004772 | 0.011531 |
| LIN28B    | 6q16.3-q21 | -0.14411 | 0.004772 | 0.011531 |
| JAM3      | 11q25      | 0.144083 | 0.004779 | 0.011546 |
| CLEC18B   | 16q23.1    | -0.14402 | 0.004799 | 0.011593 |
| NCK2      | 2q12.2     | -0.14401 | 0.004801 | 0.011596 |

|           |          |          |          |          |
|-----------|----------|----------|----------|----------|
| KCNK9     | 8q24.3   | -0.14401 | 0.004801 | 0.011596 |
| PARS2     | 1p32.3   | -0.144   | 0.004803 | 0.011598 |
| DCBLD1    | 6q22.1   | 0.144    | 0.004803 | 0.011598 |
| KCNS3     | 2p24.2   | 0.143991 | 0.004806 | 0.011603 |
| C12ORF29  | 12q21.32 | -0.14395 | 0.004817 | 0.011628 |
| DEPDC7    | 11p13    | -0.14393 | 0.004824 | 0.011643 |
| CTSK      | 1q21.3   | 0.143924 | 0.004826 | 0.011647 |
| RASGEF1B  | 4q21.21  | 0.143919 | 0.004827 | 0.011648 |
| SLC4A2    | 7q36.1   | -0.14392 | 0.004828 | 0.011648 |
| CTXN2     | 15q21.1  | 0.143884 | 0.004838 | 0.011671 |
| GPR19     | 12p13.1  | -0.14387 | 0.004841 | 0.011676 |
| SH2D1A    | Xq25     | 0.143872 | 0.004841 | 0.011676 |
| EFCAB3    | 17q23.2  | -0.14387 | 0.004841 | 0.011676 |
| SLC15A3   | 11q12.2  | 0.143864 | 0.004844 | 0.01168  |
| GNGT2     | 17q21.32 | 0.143849 | 0.004848 | 0.011689 |
| RETREG1   | 5p15.1   | 0.143816 | 0.004858 | 0.011711 |
| CCDC43    | 17q21.31 | -0.14381 | 0.004858 | 0.011711 |
| CAPN6     | Xq23     | 0.143804 | 0.004861 | 0.011717 |
| GCHFR     | 15q15.1  | -0.14377 | 0.004871 | 0.011739 |
| SH2D1B    | 1q23.3   | 0.143752 | 0.004877 | 0.011752 |
| CXCL2     | 4q13.3   | -0.14367 | 0.004902 | 0.011811 |
| PPARGC1A  | 4p15.2   | 0.143666 | 0.004903 | 0.011812 |
| NMT1      | 17q21.31 | -0.14366 | 0.004906 | 0.011817 |
| PITX1     | 5q31.1   | -0.14364 | 0.004912 | 0.01183  |
| TCTEX1D1  | 1p31.3   | 0.143635 | 0.004912 | 0.01183  |
| LINC00473 | 6q27     | 0.143619 | 0.004917 | 0.01184  |
| PMS2CL    | 7p22.1   | -0.14359 | 0.004926 | 0.011859 |
| PDZK1P1   | 1q21.2   | -0.14359 | 0.004926 | 0.011859 |
| DMRTA1    | 9p21.3   | 0.143581 | 0.004929 | 0.011864 |
| THADA     | 2p21     | -0.14358 | 0.004931 | 0.011867 |
| TPST1     | 7q11.21  | 0.14357  | 0.004932 | 0.01187  |
| SENP1     | 12q13.11 | 0.143524 | 0.004946 | 0.011902 |
| PSMA6     | 14q13.2  | -0.14344 | 0.004972 | 0.011961 |
| AQP7P1    | 9q13     | -0.14344 | 0.004972 | 0.011961 |
| ZNF653    | 19p13.2  | -0.14344 | 0.004973 | 0.011961 |
| FNDC3A    | 13q14.2  | 0.143435 | 0.004973 | 0.011961 |
| PCDHB2    | 5q31.3   | 0.143433 | 0.004974 | 0.011961 |
| CYP17A1   | 10q24.32 | -0.14342 | 0.004978 | 0.011969 |
| COL17A1   | 10q25.1  | 0.143418 | 0.004979 | 0.01197  |
| PWWP3A    | 19p13.3  | -0.14341 | 0.004982 | 0.011977 |
| BCL2L15   | 1p13.2   | 0.143403 | 0.004983 | 0.011977 |
| POSTN     | 13q13.3  | 0.143385 | 0.004988 | 0.011989 |
| SST       | 3q27.3   | 0.14338  | 0.00499  | 0.011992 |
| PDPN      | 1p36.21  | 0.143367 | 0.004994 | 0.011999 |
| TFF2      | 21q22.3  | 0.143351 | 0.004999 | 0.01201  |
| PCDH10    | 4q28.3   | 0.143345 | 0.005001 | 0.012013 |
| C9ORF24   | 9p13.3   | -0.14334 | 0.005002 | 0.012014 |
| EGR1      | 5q31.2   | 0.14334  | 0.005002 | 0.012014 |
| STK36     | 2q35     | -0.14333 | 0.005006 | 0.01202  |
| PCMTD1    | 8q11.23  | 0.143285 | 0.005019 | 0.012052 |
| C17ORF67  | 17q22    | -0.14327 | 0.005023 | 0.012059 |
| OFD1      | Xp22.2   | -0.14325 | 0.005031 | 0.012075 |
| DMTF1     | 7q21.12  | -0.14325 | 0.005031 | 0.012075 |
| SPRY1     | 4q28.1   | 0.143233 | 0.005035 | 0.012084 |
| NOMO2     | 16p12.3  | 0.143228 | 0.005037 | 0.012086 |
| ZNF583    | 19q13.43 | 0.143208 | 0.005043 | 0.0121   |
| ZNF473    | 19q13.33 | -0.14317 | 0.005055 | 0.012126 |
| HIST1H2AM | 6p22.1   | -0.14317 | 0.005056 | 0.012128 |

|           |                 |          |          |          |
|-----------|-----------------|----------|----------|----------|
| RAB11FIP2 | 10q26.11        | 0.143164 | 0.005057 | 0.012128 |
| DIRC3     | 2q35            | 0.143158 | 0.005058 | 0.012131 |
| PDE12     | 3p14.3          | 0.143152 | 0.00506  | 0.012134 |
| USP37     | 2q35            | 0.143134 | 0.005066 | 0.012146 |
| EPHX3     | 19p13.12        | 0.143087 | 0.005081 | 0.01218  |
| GPR158    | 10p12.1         | 0.143074 | 0.005085 | 0.012188 |
| TIA1      | 2p13.3          | -0.14307 | 0.005087 | 0.012192 |
| LOC646999 | 7p14.1          | -0.14302 | 0.0051   | 0.012223 |
| RRN3P1    | 16p12.2         | -0.14302 | 0.005101 | 0.012223 |
| FUS       | 16p11.2         | -0.14297 | 0.005117 | 0.01226  |
| RBFOX1    | 16p13.3         | 0.142967 | 0.005118 | 0.012261 |
| RESF1     | 12p11.21        | 0.142935 | 0.005128 | 0.012283 |
| SNORA59B  | 17p11.2         | -0.1429  | 0.005138 | 0.012307 |
| KCP       | 7q32.1          | -0.14288 | 0.005144 | 0.012319 |
| PHACTR3   | 20q13.32-q13.33 | -0.14288 | 0.005145 | 0.012319 |
| ARHGEF18  | 19p13.2         | 0.142876 | 0.005147 | 0.012322 |
| CCL28     | 5p12            | 0.142847 | 0.005156 | 0.012342 |
| ATM       | 11q22.3         | 0.14284  | 0.005158 | 0.012346 |
| THEMIS2   | 1p35.3          | 0.142839 | 0.005158 | 0.012346 |
| SDC2      | 8q22.1          | 0.142757 | 0.005185 | 0.012407 |
| TREML2    | 6p21.1          | 0.142737 | 0.005191 | 0.01242  |
| ALG14     | 1p21.3          | -0.14273 | 0.005194 | 0.012426 |
| PEX11B    | 1q21.1          | 0.142725 | 0.005194 | 0.012426 |
| CDH20     | 18q21.33        | 0.142719 | 0.005196 | 0.012429 |
| ABCA12    | 2q35            | 0.142706 | 0.005201 | 0.012438 |
| KCNJ15    | 21q22.13-q22.2  | 0.142689 | 0.005206 | 0.012449 |
| KRT38     | 17q21.2         | -0.14269 | 0.005206 | 0.012449 |
| STAP2     | 19p13.3         | -0.14264 | 0.00522  | 0.01248  |
| TBP       | 6q27            | -0.14264 | 0.005221 | 0.01248  |
| NLRC3     | 16p13.3         | 0.142639 | 0.005222 | 0.012481 |
| RXFP1     | 4q32.1          | 0.142637 | 0.005223 | 0.012481 |
| ZNF572    | 8q24.13         | -0.14261 | 0.00523  | 0.012497 |
| N4BP3     | 5q35.3          | 0.142604 | 0.005233 | 0.012503 |
| C4BPB     | 1q32.1          | 0.142574 | 0.005243 | 0.012525 |
| ALLC      | 2p25.3          | -0.14255 | 0.00525  | 0.01254  |
| RADIL     | 7p22.1          | 0.14252  | 0.00526  | 0.012563 |
| XRCC1     | 19q13.31        | -0.14251 | 0.005264 | 0.01257  |
| GATD3A    | 21q22.3         | -0.14245 | 0.005284 | 0.012617 |
| PODXL     | 7q32.3          | 0.142434 | 0.005288 | 0.012625 |
| PUM3      | 9p24.2          | -0.14242 | 0.005292 | 0.012633 |
| UBE2D3    | 4q24            | 0.142416 | 0.005294 | 0.012636 |
| BTD       | 3p25.1          | 0.142411 | 0.005295 | 0.012639 |
| TEX29     | 13q34           | -0.14239 | 0.005303 | 0.012656 |
| POLR3F    | 20p11.23        | -0.14234 | 0.005319 | 0.012692 |
| HEPHL1    | 11q21           | -0.14233 | 0.00532  | 0.012693 |
| CTIF      | 18q21.1         | 0.142248 | 0.005348 | 0.012759 |
| LOC143666 | 11p15.5         | -0.14224 | 0.005351 | 0.012763 |
| NCOA5     | 20q13.12        | -0.1422  | 0.005364 | 0.012794 |
| RBBP8     | 18q11.2         | 0.142177 | 0.005372 | 0.01281  |
| CXORF65   | Xq13.1          | -0.14217 | 0.005375 | 0.012817 |
| ACP6      | 1q21.2          | -0.14216 | 0.005378 | 0.012821 |
| HSD17B6   | 12q13.3         | 0.142147 | 0.005381 | 0.012828 |
| SF3B2     | 11q13.1         | -0.14213 | 0.005386 | 0.012839 |
| FTCD      | 21q22.3         | -0.14212 | 0.005389 | 0.012843 |
| LDHAL6A   | 11p15.1         | 0.142121 | 0.00539  | 0.012844 |
| ZNF655    | 7q22.1          | 0.142083 | 0.005402 | 0.012873 |
| DCAF11    | 14q12           | 0.142072 | 0.005406 | 0.012879 |
| VAX1      | 10q25.3         | -0.14204 | 0.005416 | 0.012902 |

|          |          |          |          |          |
|----------|----------|----------|----------|----------|
| RSAD2    | 2p25.2   | 0.142032 | 0.005419 | 0.012908 |
| GPIHBP1  | 8q24.3   | 0.14203  | 0.00542  | 0.012908 |
| ZNF185   | Xq28     | 0.142009 | 0.005427 | 0.012923 |
| NRROS    | 3q29     | 0.141957 | 0.005444 | 0.012962 |
| IGSF8    | 1q23.2   | -0.14195 | 0.005446 | 0.012965 |
| OTUD6B   | 8q21.3   | -0.14194 | 0.005448 | 0.012969 |
| GXYLT2   | 3p13     | 0.141929 | 0.005453 | 0.012979 |
| UGGT2    | 13q32.1  | -0.14193 | 0.005454 | 0.012981 |
| CMPK1    | 1p33     | 0.141918 | 0.005457 | 0.012985 |
| OGFRL1   | 6q13     | 0.141913 | 0.005459 | 0.012988 |
| MLLT1    | 19p13.3  | -0.14191 | 0.005461 | 0.012991 |
| BAX      | 19q13.33 | -0.1419  | 0.005462 | 0.012993 |
| GABRB3   | 15q12    | 0.141882 | 0.005469 | 0.013006 |
| PDK3     | Xp22.11  | -0.14188 | 0.005469 | 0.013006 |
| PLA2G4A  | 1q31.1   | 0.141842 | 0.005482 | 0.013037 |
| PABPC1P2 | 2q22.3   | -0.14182 | 0.00549  | 0.013053 |
| CDK7     | 5q13.2   | -0.14182 | 0.005491 | 0.013053 |
| PHF13    | 1p36.31  | -0.1418  | 0.005495 | 0.013062 |
| VAMP4    | 1q24.3   | 0.141793 | 0.005498 | 0.013069 |
| ARFGAP3  | 22q13.2  | 0.141752 | 0.005512 | 0.0131   |
| DNM1P35  | 15q24.2  | -0.14174 | 0.005515 | 0.013104 |
| CXADRP3  | 18p11.21 | 0.141736 | 0.005518 | 0.01311  |
| SPINK1   | 5q32     | -0.14171 | 0.005528 | 0.013132 |
| IFNAR2   | 21q22.11 | 0.141695 | 0.005532 | 0.01314  |
| CASP6    | 4q25     | -0.14167 | 0.00554  | 0.013159 |
| XRCC4    | 5q14.2   | -0.14167 | 0.005541 | 0.01316  |
| CALHM1   | 10q24.33 | 0.141654 | 0.005545 | 0.013164 |
| PRSS41   | 16p13.3  | -0.14165 | 0.005545 | 0.013164 |
| LCAT     | 16q22.1  | -0.14165 | 0.005545 | 0.013164 |
| SYCE2    | 19p13.13 | -0.14165 | 0.005546 | 0.013164 |
| PCNT     | 21q22.3  | 0.141636 | 0.005551 | 0.013175 |
| INSM2    | 14q13.2  | 0.141619 | 0.005557 | 0.013187 |
| ANGPT1   | 8q23.1   | 0.141618 | 0.005557 | 0.013187 |
| KCNK12   | 2p16.3   | 0.141602 | 0.005563 | 0.013198 |
| TEF      | 22q13.2  | 0.14157  | 0.005574 | 0.013223 |
| TSN      | 2q14.3   | -0.14156 | 0.005578 | 0.013232 |
| RBM7     | 11q23.2  | 0.141532 | 0.005586 | 0.01325  |
| MTSS1    | 8q24.13  | 0.141504 | 0.005596 | 0.013271 |
| HS3ST2   | 16p12.2  | 0.141468 | 0.005608 | 0.013298 |
| FAM104A  | 17q25.1  | -0.14144 | 0.005618 | 0.013319 |
| TNS3     | 7p12.3   | 0.141439 | 0.005618 | 0.013319 |
| ARHGDIG  | 16p13.3  | 0.141429 | 0.005621 | 0.013325 |
| R3HCC1L  | 10q24.2  | 0.141424 | 0.005623 | 0.013327 |
| CLHC1    | 2p16.1   | -0.14142 | 0.005626 | 0.013331 |
| CRCP     | 7q11.21  | -0.14141 | 0.00563  | 0.013339 |
| GXYLT1   | 12q12    | 0.141392 | 0.005634 | 0.013347 |
| TNFRSF9  | 1p36.23  | 0.141392 | 0.005634 | 0.013347 |
| C6ORF201 | 6p25.2   | 0.141371 | 0.005641 | 0.013362 |
| CYTH1    | 17q25.3  | 0.141363 | 0.005644 | 0.013368 |
| ELMO3    | 16q22.1  | -0.14136 | 0.005646 | 0.013369 |
| XK       | Xp21.1   | 0.141352 | 0.005648 | 0.013373 |
| MYO1F    | 19p13.2  | 0.141337 | 0.005653 | 0.013384 |
| COQ10B   | 2q33.1   | 0.141333 | 0.005654 | 0.013386 |
| PNMA8B   | 19q13.32 | 0.141318 | 0.005659 | 0.013396 |
| RAD9B    | 12q24.11 | -0.14132 | 0.00566  | 0.013397 |
| CHRND    | 2q37.1   | -0.14129 | 0.005668 | 0.013413 |
| PI4KB    | 1q21.3   | 0.141265 | 0.005678 | 0.013434 |
| C2ORF66  | 2q33.1   | 0.141254 | 0.005682 | 0.013442 |

|           |               |          |          |          |
|-----------|---------------|----------|----------|----------|
| CPZ       | 4p16.1        | 0.141207 | 0.005698 | 0.013478 |
| IKZF4     | 12q13.2       | 0.141196 | 0.005702 | 0.013486 |
| DHRS11    | 17q12         | -0.14116 | 0.005715 | 0.013515 |
| MBD1      | 18q21.1       | 0.141151 | 0.005717 | 0.013519 |
| GATA3     | 10p14         | 0.141133 | 0.005723 | 0.013533 |
| FCRL6     | 1q23.2        | 0.141127 | 0.005725 | 0.013536 |
| WDR35     | 2p24.1        | -0.14112 | 0.005729 | 0.013544 |
| LOC389705 | 9p22.3        | -0.14109 | 0.00574  | 0.013567 |
| SEC14L5   | 16p13.3       | 0.141077 | 0.005743 | 0.013572 |
| PNRC2     | 1p36.11       | -0.14108 | 0.005743 | 0.013572 |
| CAPNS1    | 19q13.12      | -0.14102 | 0.005763 | 0.013617 |
| HIST3H3   | 1q42.13       | 0.141005 | 0.005768 | 0.013626 |
| RGPD6     | 2q13          | 0.140998 | 0.00577  | 0.013631 |
| SLC28A2   | 15q21.1       | 0.140996 | 0.005771 | 0.013631 |
| MIR100HG  | 11q24.1       | 0.140974 | 0.005779 | 0.013648 |
| BCHE      | 3q26.1        | 0.140947 | 0.005788 | 0.013668 |
| CYP27A1   | 2q35          | -0.14093 | 0.005795 | 0.013683 |
| NAIP      | 5q13.2        | 0.140907 | 0.005802 | 0.013698 |
| SPAG8     | 9p13.3        | -0.1409  | 0.005806 | 0.013705 |
| BNC1      | 15q25.2       | 0.140885 | 0.00581  | 0.013712 |
| TRIM36    | 5q22.3        | 0.140885 | 0.00581  | 0.013712 |
| OR7E91P   | 2p13.3        | 0.140883 | 0.005811 | 0.013712 |
| ZFP41     | 8q24.3        | -0.14087 | 0.005817 | 0.013725 |
| CADM4     | 19q13.31      | -0.14086 | 0.00582  | 0.013731 |
| EFCAB7    | 1p31.3        | -0.14082 | 0.005832 | 0.013757 |
| GRID1     | 10q23.1-q23.2 | 0.140817 | 0.005834 | 0.01376  |
| TAF1      | Xq13.1        | 0.140769 | 0.005851 | 0.013798 |
| TNFSF13B  | 13q33.3       | 0.140765 | 0.005852 | 0.0138   |
| PCDHB12   | 5q31.3        | 0.140759 | 0.005855 | 0.013804 |
| ZNF154    | 19q13.43      | 0.140751 | 0.005857 | 0.013809 |
| BRF1      | 14q32.33      | -0.14074 | 0.005862 | 0.013819 |
| PRAF2     | Xp11.23       | -0.14072 | 0.005869 | 0.013833 |
| TK2       | 16q21         | 0.140701 | 0.005875 | 0.013845 |
| HLA-DPB1  | 6p21.32       | 0.14065  | 0.005893 | 0.013886 |
| KDM4A     | 1p34.2-p34.1  | 0.140621 | 0.005903 | 0.013909 |
| ADCY6     | 12q13.12      | 0.140586 | 0.005916 | 0.013937 |
| LOC344967 | 4p14          | -0.14057 | 0.005922 | 0.013949 |
| GJC1      | 17q21.31      | 0.140543 | 0.005931 | 0.01397  |
| SP5       | 2q31.1        | -0.1405  | 0.005945 | 0.014001 |
| MAPK3     | 16p11.2       | 0.140495 | 0.005949 | 0.014007 |
| KIF23     | 15q23         | 0.140482 | 0.005953 | 0.014017 |
| PODNL1    | 19p13.12      | 0.140465 | 0.005959 | 0.01403  |
| RFC5      | 12q24.23      | -0.14045 | 0.005965 | 0.01404  |
| CENPB     | 20p13         | -0.14045 | 0.005965 | 0.01404  |
| PIANP     | 12p13.31      | 0.140445 | 0.005967 | 0.014041 |
| FGFR1OP2  | 12p11.23      | 0.140415 | 0.005977 | 0.014065 |
| PRR16     | 5q23.1        | 0.140391 | 0.005986 | 0.014083 |
| PLEKHG6   | 12p13.31      | -0.14032 | 0.006012 | 0.014142 |
| GNAS      | 20q13.32      | -0.1403  | 0.006018 | 0.014157 |
| ZBTB39    | 12q13.3       | 0.140297 | 0.00602  | 0.014159 |
| PLA2G10   | 16p13.12      | 0.140288 | 0.006023 | 0.014165 |
| TAF4      | 20q13.33      | -0.14027 | 0.006028 | 0.014174 |
| FASTKD3   | 5p15.31       | -0.14027 | 0.00603  | 0.014177 |
| OVOL1     | 11q13.1       | -0.14025 | 0.006037 | 0.014192 |
| UBE2D2    | 5q31.2        | -0.14024 | 0.006039 | 0.014196 |
| TRMT61B   | 2p23.2        | -0.14022 | 0.006049 | 0.014218 |
| AURKAP1   | 1q41          | -0.14021 | 0.006053 | 0.014226 |
| FMNL2     | 2q23.3        | 0.140197 | 0.006056 | 0.014231 |

|           |                |          |          |          |
|-----------|----------------|----------|----------|----------|
| CORO1C    | 12q24.11       | 0.140192 | 0.006058 | 0.014234 |
| GPANK1    | 6p21.33        | -0.14014 | 0.006078 | 0.014277 |
| SLFNL1    | 1p34.2         | -0.14013 | 0.006079 | 0.01428  |
| FGF5      | 4q21.21        | 0.140101 | 0.006091 | 0.014306 |
| HOGA1     | 10q24.2        | -0.1401  | 0.006092 | 0.014306 |
| GPRIN1    | 5q35.2         | 0.140076 | 0.006101 | 0.014325 |
| CDKN2C    | 1p32.3         | 0.140044 | 0.006113 | 0.014351 |
| CAV2      | 7q31.2         | 0.140007 | 0.006126 | 0.014381 |
| TLX2      | 2p13.1         | 0.140001 | 0.006128 | 0.014385 |
| NALCN     | 13q32.3-q33.1  | 0.13999  | 0.006132 | 0.014393 |
| FPGT      | 1p31.1         | 0.139922 | 0.006157 | 0.01445  |
| SMC2      | 9q31.1         | 0.139912 | 0.006161 | 0.014457 |
| CSF3R     | 1p34.3         | 0.139867 | 0.006178 | 0.014494 |
| SYNGR2    | 17q25.3        | -0.13986 | 0.006181 | 0.014499 |
| COL6A1    | 21q22.3        | 0.139858 | 0.006181 | 0.014499 |
| SMARCD1   | 12q13.12       | -0.13985 | 0.006183 | 0.014502 |
| EIF4ENIF1 | 22q12.2        | 0.139844 | 0.006186 | 0.014507 |
| CCDC69    | 5q33.1         | 0.139812 | 0.006198 | 0.014534 |
| OSTM1     | 6q21           | 0.1398   | 0.006203 | 0.014542 |
| ANKRD35   | 1q21.1         | 0.139797 | 0.006204 | 0.014543 |
| AVL9      | 7p14.3         | 0.139789 | 0.006207 | 0.014549 |
| ZNF862    | 7q36.1         | -0.13979 | 0.006208 | 0.014549 |
| TIAM2     | 6q25.2-q25.3   | 0.139722 | 0.006232 | 0.014605 |
| MANBA     | 4q24           | 0.139715 | 0.006234 | 0.014608 |
| TPSD1     | 16p13.3        | 0.139685 | 0.006246 | 0.014633 |
| COL24A1   | 1p22.3         | 0.139664 | 0.006254 | 0.01465  |
| UBAP2     | 9p13.3         | 0.139651 | 0.006259 | 0.01466  |
| RBAKDN    | 7p22.1         | -0.13961 | 0.006275 | 0.014695 |
| OXT       | 20p13          | -0.13961 | 0.006275 | 0.014695 |
| CNDP2     | 18q22.3        | 0.139565 | 0.006291 | 0.01473  |
| RPH3AL    | 17p13.3        | 0.13956  | 0.006293 | 0.014733 |
| TNNC1     | 3p21.1         | -0.13956 | 0.006294 | 0.014733 |
| C19ORF18  | 19q13.43       | -0.13955 | 0.006296 | 0.014736 |
| OLFML2A   | 9q33.3         | 0.139534 | 0.006303 | 0.014751 |
| A1BG-AS1  | 19q13.43       | 0.139531 | 0.006304 | 0.014751 |
| BANF2     | 20p12.1        | -0.13951 | 0.006312 | 0.01477  |
| GPER1     | 7p22.3         | 0.139505 | 0.006314 | 0.014772 |
| ACSM5     | 16p12.3        | 0.1395   | 0.006316 | 0.014773 |
| PIGO      | 9p13.3         | 0.139499 | 0.006316 | 0.014773 |
| CKLF      | 16q21          | -0.13948 | 0.006324 | 0.01479  |
| AWAT1     | Xq13.1         | -0.13947 | 0.006328 | 0.014797 |
| PCDHB3    | 5q31.3         | 0.139464 | 0.006329 | 0.014799 |
| LINGO2    | 9p21.2-p21.1   | 0.139442 | 0.006337 | 0.014817 |
| RIC8A     | 11p15.5        | -0.13943 | 0.006342 | 0.014825 |
| FOXC2     | 16q24.1        | 0.139427 | 0.006343 | 0.014827 |
| SPDYE8P   | 7q11.23        | -0.13942 | 0.006345 | 0.014829 |
| DNHD1     | 11p15.4        | -0.13941 | 0.006349 | 0.014837 |
| MILR1     | 17q23.3        | 0.139402 | 0.006353 | 0.014844 |
| CFAP43    | 10q25.1        | -0.13937 | 0.006365 | 0.014872 |
| FPR2      | 19q13.41       | 0.139354 | 0.006371 | 0.014882 |
| LHFPL6    | 13q13.3-q14.11 | 0.139353 | 0.006371 | 0.014882 |
| GDAP2     | 1p12           | 0.139292 | 0.006395 | 0.014935 |
| MED24     | 17q21.1        | -0.13926 | 0.006406 | 0.01496  |
| TNRC6C    | 17q25.3        | 0.139248 | 0.006412 | 0.014971 |
| DYNC2H1   | 11q22.3        | 0.139222 | 0.006422 | 0.014993 |
| SLC35E4   | 22q12.2        | -0.13921 | 0.006425 | 0.014998 |
| FKBP9P1   | 7p11.2         | 0.139202 | 0.006429 | 0.015006 |
| KIF20B    | 10q23.31       | 0.1392   | 0.00643  | 0.015006 |

|           |            |          |          |          |
|-----------|------------|----------|----------|----------|
| FMO2      | 1q24.3     | 0.1392   | 0.00643  | 0.015006 |
| SPATA31A6 | 9p11.2     | -0.13916 | 0.006446 | 0.015041 |
| LOC401463 | 8q12.3     | 0.139155 | 0.006448 | 0.015041 |
| FMR1NB    | Xq27.3-q28 | -0.13915 | 0.006448 | 0.015041 |
| SAMD4A    | 14q22.2    | 0.139131 | 0.006457 | 0.01506  |
| CLNK      | 4p16.1     | 0.139094 | 0.006471 | 0.015092 |
| SLC9A5    | 16q22.1    | -0.13909 | 0.006472 | 0.015092 |
| NCOR2     | 12q24.31   | 0.139077 | 0.006478 | 0.015104 |
| TSC22D3   | Xq22.3     | 0.13907  | 0.00648  | 0.015109 |
| TIMP3     | 22q12.3    | 0.139042 | 0.006491 | 0.015132 |
| HORMAD1   | 1q21.3     | 0.139035 | 0.006494 | 0.015137 |
| PMEL      | 12q13.2    | -0.13902 | 0.006501 | 0.015152 |
| SFN       | 1p36.11    | -0.139   | 0.006506 | 0.015162 |
| ZBED6CL   | 7q36.1     | -0.139   | 0.006507 | 0.015162 |
| TMEFF2    | 2q32.3     | 0.138994 | 0.00651  | 0.015167 |
| DBR1      | 3q22.3     | 0.138986 | 0.006513 | 0.015172 |
| FANCI     | 15q26.1    | 0.138974 | 0.006518 | 0.01518  |
| EFCAB8    | 20q11.21   | -0.13897 | 0.006518 | 0.01518  |
| OR1J1     | 9q33.2     | -0.13894 | 0.00653  | 0.015207 |
| GPR137C   | 14q22.1    | 0.138936 | 0.006532 | 0.015207 |
| HES2      | 1p36.31    | 0.138936 | 0.006532 | 0.015207 |
| LHFPL4    | 3p25.3     | 0.138936 | 0.006533 | 0.015207 |
| SLC25A53  | Xq22.2     | 0.138932 | 0.006534 | 0.015209 |
| MOK       | 14q32.31   | -0.13889 | 0.006549 | 0.015243 |
| KLRF1     | 12p13.31   | 0.138873 | 0.006557 | 0.015259 |
| SRRM4     | 12q24.23   | 0.138868 | 0.006559 | 0.015262 |
| PCDHA12   | 5q31.3     | 0.138857 | 0.006563 | 0.015269 |
| KANSL2    | 12q13.11   | -0.13886 | 0.006564 | 0.015269 |
| PYY2      | 17q11.2    | -0.13885 | 0.006565 | 0.01527  |
| ABHD18    | 4q28.2     | 0.138851 | 0.006566 | 0.01527  |
| SYT6      | 1p13.2     | 0.138838 | 0.006571 | 0.015279 |
| ZFP90     | 16q22.1    | 0.138838 | 0.006571 | 0.015279 |
| KCNK17    | 6p21.2     | -0.13883 | 0.006572 | 0.01528  |
| BOK       | 2q37.3     | -0.13882 | 0.006579 | 0.015292 |
| KLHDC7A   | 1p36.13    | 0.138817 | 0.006579 | 0.015292 |
| CYP4F12   | 19p13.12   | -0.13881 | 0.006581 | 0.015296 |
| ZNF91     | 19p12      | 0.138808 | 0.006583 | 0.015297 |
| LINC00167 | 11q24.3    | -0.1388  | 0.006585 | 0.0153   |
| ZNF284    | 19q13.31   | 0.138791 | 0.006589 | 0.015309 |
| SCAMP3    | 1q22       | -0.13878 | 0.006595 | 0.015321 |
| CLCA4     | 1p22.3     | 0.138741 | 0.006609 | 0.015352 |
| LOC283731 | 15q24.1    | 0.138722 | 0.006616 | 0.015367 |
| PPM1K     | 4q22.1     | 0.138717 | 0.006618 | 0.01537  |
| FAM241A   | 4q25       | 0.138705 | 0.006623 | 0.015379 |
| DNAJB5    | 9p13.3     | 0.138692 | 0.006628 | 0.015389 |
| CC2D2A    | 4p15.32    | 0.138681 | 0.006633 | 0.015397 |
| DRD4      | 11p15.5    | -0.13859 | 0.006667 | 0.015476 |
| PCDHB8    | 5q31.3     | 0.138592 | 0.006668 | 0.015476 |
| ZRANB2    | 1p31.1     | -0.13859 | 0.00667  | 0.015479 |
| CXCL12    | 10q11.21   | 0.138582 | 0.006672 | 0.015481 |
| UPP1      | 7p12.3     | -0.13856 | 0.006682 | 0.015503 |
| SPACA9    | 9q34.13    | -0.13855 | 0.006685 | 0.015509 |
| SRD5A3    | 4q12       | 0.138545 | 0.006687 | 0.01551  |
| SLC9A3R1  | 17q25.1    | -0.13852 | 0.006696 | 0.015529 |
| SIK3      | 11q23.3    | 0.138512 | 0.0067   | 0.015537 |
| SLC26A6   | 3p21.31    | -0.1385  | 0.006704 | 0.015545 |
| SFRP4     | 7p14.1     | 0.138495 | 0.006707 | 0.01555  |
| DTX2      | 7q11.23    | -0.13849 | 0.006709 | 0.015552 |



|           |          |          |          |          |
|-----------|----------|----------|----------|----------|
| SNX2      | 5q23.2   | 0.138487 | 0.00671  | 0.015553 |
| ERGIC1    | 5q35.1   | 0.138485 | 0.006711 | 0.015553 |
| FOXD4     | 9p24.3   | 0.138473 | 0.006716 | 0.015563 |
| CRYBG2    | 1p36.11  | -0.13847 | 0.006717 | 0.015564 |
| LINC00896 | 22q11.21 | -0.13846 | 0.006722 | 0.015574 |
| RARG      | 12q13.13 | 0.138448 | 0.006726 | 0.015581 |
| ANP32AP1  | 15q14    | 0.138442 | 0.006728 | 0.015584 |
| KLHL5     | 4p14     | 0.138417 | 0.006738 | 0.015606 |
| GPR3      | 1p36.11  | -0.13841 | 0.006742 | 0.015614 |
| CRB3      | 19p13.3  | -0.13839 | 0.00675  | 0.01563  |
| MOB3B     | 9p21.2   | 0.138353 | 0.006764 | 0.01566  |
| TBRG1     | 11q24.2  | -0.13833 | 0.006774 | 0.015683 |
| PDCD7     | 15q22.31 | 0.138324 | 0.006775 | 0.015683 |
| SACM1L    | 3p21.31  | 0.138321 | 0.006777 | 0.015684 |
| GATA2     | 3q21.3   | 0.138297 | 0.006786 | 0.015704 |
| C6ORF47   | 6p21.33  | -0.13828 | 0.006794 | 0.015721 |
| KIAA1755  | 20q11.23 | 0.138272 | 0.006797 | 0.015725 |
| CEP70     | 3q22.3   | 0.13826  | 0.006801 | 0.015734 |
| PEX3      | 6q24.2   | -0.13825 | 0.006806 | 0.015743 |
| METTL6    | 3p25.1   | -0.13822 | 0.006816 | 0.015762 |
| COX20     | 1q44     | -0.13822 | 0.006816 | 0.015762 |
| C8ORF34   | 8q13.2   | 0.138189 | 0.00683  | 0.015793 |
| TUBA3D    | 2q21.1   | 0.138129 | 0.006854 | 0.015848 |
| ISLR2     | 15q24.1  | 0.138121 | 0.006858 | 0.015853 |
| FYTTD1    | 3q29     | 0.138107 | 0.006863 | 0.015865 |
| SMIM24    | 19p13.3  | -0.1381  | 0.006865 | 0.015867 |
| TMED10P1  | 8q24.3   | 0.138097 | 0.006867 | 0.01587  |
| CABIN1    | 22q11.23 | 0.138086 | 0.006872 | 0.015879 |
| CCDC127   | 5p15.33  | -0.13808 | 0.006873 | 0.01588  |
| GNAI2     | 3p21.31  | 0.138025 | 0.006897 | 0.015934 |
| PRSS50    | 3p21.31  | -0.13801 | 0.006901 | 0.015941 |
| DDX58     | 9p21.1   | 0.138012 | 0.006902 | 0.015941 |
| SELENOT   | 3q25.1   | 0.138011 | 0.006903 | 0.015941 |
| WNK3      | Xp11.22  | 0.138008 | 0.006904 | 0.015942 |
| FMN2      | 1q43     | 0.138004 | 0.006906 | 0.015944 |
| METRNL    | 16p13.3  | -0.13799 | 0.006913 | 0.01596  |
| NAGA      | 22q13.2  | 0.137983 | 0.006914 | 0.01596  |
| CASQ2     | 1p13.1   | 0.137968 | 0.00692  | 0.015972 |
| PCNA      | 20p12.3  | -0.13797 | 0.006921 | 0.015972 |
| CRY2      | 11p11.2  | 0.137957 | 0.006925 | 0.015979 |
| MYO7B     | 2q14.3   | 0.137945 | 0.00693  | 0.015989 |
| ARHGAP9   | 12q13.3  | 0.137944 | 0.00693  | 0.015989 |
| FBXL19    | 16p11.2  | -0.13793 | 0.006936 | 0.015998 |
| FBXO31    | 16q24.2  | -0.13792 | 0.006941 | 0.01601  |
| LINC02381 | 12q13.13 | 0.137875 | 0.006959 | 0.016048 |
| SOX12     | 20p13    | -0.13786 | 0.006966 | 0.016064 |
| PLPP3     | 1p32.2   | 0.137846 | 0.006971 | 0.016073 |
| PLA2G1B   | 12q24.31 | -0.13782 | 0.00698  | 0.016091 |
| ZSCAN23   | 6p22.1   | 0.137754 | 0.007009 | 0.016157 |
| MAOA      | Xp11.3   | 0.137745 | 0.007013 | 0.016163 |
| TRIM52    | 5q35.3   | -0.13773 | 0.007018 | 0.016173 |
| NCOA3     | 20q13.12 | 0.13773  | 0.007019 | 0.016174 |
| FIGNL1    | 7p12.2   | -0.13772 | 0.007023 | 0.016181 |
| CTBP1-DT  | 4p16.3   | 0.137692 | 0.007035 | 0.016207 |
| FAM110B   | 8q12.1   | 0.137639 | 0.007057 | 0.016256 |
| INTS4P2   | 7q11.21  | 0.137599 | 0.007074 | 0.016293 |
| COMMD3    | 10p12.2  | -0.1376  | 0.007075 | 0.016295 |
| ACTR8     | 3p21.1   | 0.13759  | 0.007078 | 0.016298 |

|          |              |          |          |          |
|----------|--------------|----------|----------|----------|
| NLRP12   | 19q13.42     | 0.137561 | 0.007089 | 0.016323 |
| MRPL50   | 9q31.1       | -0.13755 | 0.007093 | 0.016331 |
| FANCB    | Xp22.2       | -0.13753 | 0.007101 | 0.016345 |
| RASL10A  | 22q12.2      | -0.13749 | 0.007117 | 0.016381 |
| HOXD8    | 2q31.1       | 0.137494 | 0.007118 | 0.016381 |
| DZANK1   | 20p11.23     | -0.13746 | 0.007132 | 0.016411 |
| SLC45A2  | 5p13.2       | -0.13743 | 0.007146 | 0.016443 |
| ATG16L1  | 2q37.1       | -0.13738 | 0.007164 | 0.016482 |
| IQCG     | 3q29         | 0.137378 | 0.007167 | 0.016486 |
| MAGIX    | Xp11.23      | -0.13737 | 0.007169 | 0.01649  |
| ZRANB3   | 2q21.3       | 0.137353 | 0.007178 | 0.016507 |
| ZNF395   | 8p21.1       | 0.137351 | 0.007178 | 0.016507 |
| POLR3A   | 10q22.3      | 0.137322 | 0.007191 | 0.016534 |
| NOS1     | 12q24.22     | 0.137317 | 0.007193 | 0.016537 |
| SLC4A8   | 12q13.13     | 0.137312 | 0.007195 | 0.01654  |
| CYP2S1   | 19q13.2      | -0.13729 | 0.007206 | 0.016563 |
| GSTA1    | 6p12.2       | 0.137259 | 0.007217 | 0.016587 |
| SCRN3    | 2q31.1       | 0.137209 | 0.007239 | 0.016635 |
| PPIC     | 5q23.2       | 0.137204 | 0.007241 | 0.016638 |
| SLC6A16  | 19q13.33     | 0.137178 | 0.007252 | 0.016661 |
| POLR2B   | 4q12         | 0.137176 | 0.007253 | 0.016662 |
| MMACHC   | 1p34.1       | -0.13716 | 0.00726  | 0.016675 |
| NAA35    | 9q21.33      | 0.137146 | 0.007266 | 0.016688 |
| ZNF503   | 10q22.2      | -0.13707 | 0.007297 | 0.016757 |
| SQSTM1   | 5q35.3       | -0.13704 | 0.007312 | 0.016789 |
| SRGAP2   | 1q32.1       | 0.137034 | 0.007314 | 0.016792 |
| STXBP4   | 17q22        | 0.136998 | 0.00733  | 0.016826 |
| ZNF385B  | 2q31.2-q31.3 | 0.136991 | 0.007333 | 0.016831 |
| VIPR2    | 7q36.3       | 0.136978 | 0.007338 | 0.016842 |
| FBLN1    | 22q13.31     | 0.136967 | 0.007343 | 0.016851 |
| PARP16   | 15q22.31     | 0.136953 | 0.007349 | 0.016863 |
| EIF4G3   | 1p36.12      | 0.13695  | 0.007351 | 0.016864 |
| LBH      | 2p23.1       | 0.136948 | 0.007351 | 0.016864 |
| TRPV2    | 17p11.2      | 0.136921 | 0.007363 | 0.01689  |
| ZC3H12D  | 6q25.1       | 0.136913 | 0.007366 | 0.016895 |
| ZNF845   | 19q13.42     | 0.136901 | 0.007372 | 0.016906 |
| IRX3     | 16q12.2      | 0.136894 | 0.007375 | 0.016911 |
| AUH      | 9q22.31      | -0.13688 | 0.00738  | 0.01692  |
| AIF1     | 6p21.33      | 0.136879 | 0.007381 | 0.016922 |
| RXFP3    | 5p13.2       | 0.136869 | 0.007386 | 0.016928 |
| MICA     | 6p21.33      | -0.13687 | 0.007386 | 0.016928 |
| SCYL1    | 11q13.1      | -0.13685 | 0.007395 | 0.016947 |
| MICU1    | 10q22.1      | 0.13683  | 0.007403 | 0.016961 |
| COL2A1   | 12q13.11     | -0.13683 | 0.007403 | 0.016961 |
| KLHDC1   | 14q21.3      | 0.136827 | 0.007404 | 0.016962 |
| UBE3C    | 7q36.3       | 0.136775 | 0.007427 | 0.017012 |
| IPO7     | 11p15.4      | 0.136763 | 0.007432 | 0.017022 |
| CDC37L1  | 9p24.1       | 0.136758 | 0.007434 | 0.017025 |
| SEZ6     | 17q11.2      | 0.136739 | 0.007443 | 0.017043 |
| INTS7    | 1q32.3       | 0.136723 | 0.00745  | 0.017057 |
| TBC1D5   | 3p24.3       | 0.136709 | 0.007456 | 0.017069 |
| CD6      | 11q12.2      | 0.1367   | 0.00746  | 0.017076 |
| TMEM200C | 18p11.31     | 0.136685 | 0.007466 | 0.017089 |
| WWP2     | 16q22.1      | 0.136655 | 0.00748  | 0.017117 |
| RHOBTB3  | 5q15         | 0.136589 | 0.007508 | 0.017181 |
| CDC6     | 17q21.2      | -0.13656 | 0.007522 | 0.01721  |
| OLFM3    | 1p21.1       | 0.136506 | 0.007545 | 0.017262 |
| HUS1B    | 6p25.3       | -0.1365  | 0.007547 | 0.017263 |

|           |                        |          |          |          |
|-----------|------------------------|----------|----------|----------|
| PPP1R3B   | 8p23.1                 | 0.136495 | 0.007551 | 0.01727  |
| PARVG     | 22q13.31               | 0.136419 | 0.007584 | 0.017345 |
| COL4A3    | 2q36.3                 | 0.136413 | 0.007587 | 0.017349 |
| OSBPL6    | 2q31.2                 | 0.136378 | 0.007603 | 0.017383 |
| CCL21     | 9p13.3                 | 0.136371 | 0.007606 | 0.017388 |
| TOM1      | 22q12.3                | -0.13635 | 0.007616 | 0.01741  |
| CTAGE15   | 7q35                   | 0.136335 | 0.007622 | 0.017421 |
| NAA60     | 16p13.3                | -0.13632 | 0.00763  | 0.017437 |
| RNASE6    | 14q11.2                | 0.136314 | 0.007631 | 0.017438 |
| ISX       | 22q12.3                | 0.13631  | 0.007633 | 0.01744  |
| CELSR1    | 22q13.31               | 0.136304 | 0.007636 | 0.017445 |
| KIAA1522  | 1p35.1                 | 0.136299 | 0.007638 | 0.017448 |
| HNF4G     | 8q21.13                | 0.136293 | 0.007641 | 0.017452 |
| RBM4B     | 11q13.2                | -0.13628 | 0.007646 | 0.017463 |
| TEKT5     | 16p13.13               | -0.13627 | 0.00765  | 0.017469 |
| MRGPRF    | 11q13.3                | 0.136252 | 0.007659 | 0.017488 |
| MSS51     | 10q22.2                | -0.13622 | 0.007674 | 0.017519 |
| ADCYAP1R1 | 7p14.3                 | 0.136195 | 0.007685 | 0.017543 |
| CD34      | 1q32.2                 | 0.136185 | 0.00769  | 0.017552 |
| DEPP1     | 10q11.21               | 0.136165 | 0.007698 | 0.017569 |
| SETDB1    | 1q21.3                 | 0.136118 | 0.00772  | 0.017616 |
| TTC30B    | 2q31.2                 | 0.136113 | 0.007722 | 0.01762  |
| ATP12A    | 13q12.12 13q12.1-q12.3 | 0.136105 | 0.007725 | 0.017625 |
| PHETA2    | 22q13.2                | 0.136045 | 0.007753 | 0.017685 |
| C6ORF136  | 6p21.33                | -0.13604 | 0.007755 | 0.017688 |
| DLL1      | 6q27                   | 0.13598  | 0.007782 | 0.017749 |
| PNRC1     | 6q15                   | 0.135957 | 0.007793 | 0.017771 |
| SPEF1     | 20p13                  | -0.13594 | 0.007799 | 0.017783 |
| DCAF13P3  | 15q21.2                | -0.13594 | 0.007803 | 0.017789 |
| SLU7      | 5q33.3                 | 0.135904 | 0.007817 | 0.017821 |
| NEK4      | 3p21.1                 | 0.135876 | 0.00783  | 0.017848 |
| HNRNPK    | 9q21.32                | 0.135853 | 0.00784  | 0.01787  |
| SPTA1     | 1q23.1                 | 0.135816 | 0.007858 | 0.017907 |
| EVA1B     | 1p34.3                 | -0.13578 | 0.007872 | 0.017937 |
| SCUBE1    | 22q13.2                | 0.135771 | 0.007878 | 0.01795  |
| LINC00924 | 15q26.2                | 0.135756 | 0.007885 | 0.017964 |
| STBD1     | 4q21.1                 | 0.135743 | 0.007891 | 0.017975 |
| ZFP3      | 17p13.2                | 0.135732 | 0.007896 | 0.017985 |
| PTTG1IP   | 21q22.3                | 0.135724 | 0.0079   | 0.017991 |
| XPO7      | 8p21.3                 | 0.135716 | 0.007904 | 0.017998 |
| DCAF4     | 14q24.2                | -0.1357  | 0.007913 | 0.018016 |
| RCBTB1    | 13q14.2                | -0.13569 | 0.007914 | 0.018016 |
| PPIL6     | 6q21                   | -0.13568 | 0.007922 | 0.018032 |
| CLDN8     | 21q22.11               | 0.135645 | 0.007937 | 0.018064 |
| NARS      | 18q21.31               | 0.13564  | 0.007939 | 0.018068 |
| ADAM21    | 14q24.2                | 0.135636 | 0.007941 | 0.01807  |
| GBP4      | 1p22.2                 | 0.135595 | 0.00796  | 0.018111 |
| RIPPLY3   | 21q22.13               | -0.13558 | 0.007965 | 0.018121 |
| KCNK6     | 19q13.2                | 0.135547 | 0.007982 | 0.018158 |
| PTPN12    | 7q11.23                | 0.135542 | 0.007985 | 0.018162 |
| ARHGEF15  | 17p13.1                | 0.135536 | 0.007987 | 0.018165 |
| ACY3      | 11q13.2                | -0.13553 | 0.007989 | 0.018167 |
| TUBB1     | 20q13.32               | -0.13552 | 0.007994 | 0.018175 |
| NAP1L1    | 12q21.2                | -0.13552 | 0.007994 | 0.018175 |
| RNF219    | 13q31.1                | -0.13552 | 0.007997 | 0.018179 |
| PCDH9     | 13q21.32               | 0.135502 | 0.008004 | 0.018192 |
| MDH1B     | 2q33.3                 | -0.13549 | 0.008009 | 0.018203 |
| PLEKHA8P1 | 12q12                  | -0.13548 | 0.008013 | 0.018209 |

|            |                 |          |          |          |
|------------|-----------------|----------|----------|----------|
| RMI2       | 16p13.13        | -0.13544 | 0.008033 | 0.018252 |
| RNF182     | 6p23            | -0.13543 | 0.008035 | 0.018256 |
| TMEM232    | 5q22.1          | 0.135401 | 0.008051 | 0.018289 |
| AKAP4      | Xp11.22         | -0.1354  | 0.008052 | 0.01829  |
| RBP3       | 10q11.22        | 0.135387 | 0.008058 | 0.0183   |
| LOC652276  | 16p13.3         | -0.13537 | 0.008064 | 0.018311 |
| ICOS       | 2q33.2          | 0.135344 | 0.008078 | 0.018341 |
| TAF5       | 22q13.32        | 0.135342 | 0.008078 | 0.018341 |
| RNF151     | 16p13.3         | -0.13533 | 0.008083 | 0.018348 |
| UFM1       | 13q13.3         | -0.13531 | 0.008092 | 0.018367 |
| DPP3       | 11q13.2         | -0.13531 | 0.008094 | 0.018371 |
| CD302      | 2q24.2          | 0.135296 | 0.0081   | 0.018383 |
| LILRB3     | 19q13.42        | 0.135288 | 0.008104 | 0.01839  |
| LRRC40     | 1p31.1          | 0.13528  | 0.008108 | 0.018396 |
| SEPSECS    | 4p15.2          | 0.135274 | 0.008111 | 0.0184   |
| ATP1A1-AS1 | 1p13.1          | -0.13524 | 0.008125 | 0.018431 |
| DMRTA2     | 1p32.3          | 0.135237 | 0.008128 | 0.018436 |
| MIR31HG    | 9p21.3          | 0.135229 | 0.008132 | 0.018442 |
| ZNF503-AS2 | 10q22.2         | -0.13522 | 0.008137 | 0.018452 |
| PLCXD2     | 3q13.2          | 0.135197 | 0.008147 | 0.018472 |
| PUS7L      | 12q12           | 0.135173 | 0.008159 | 0.018497 |
| TMED4      | 7p13            | -0.13515 | 0.008169 | 0.018518 |
| HMG20B     | 19p13.3         | -0.13514 | 0.008176 | 0.018531 |
| PTBP3      | 9q32            | 0.135128 | 0.00818  | 0.018539 |
| CLEC4A     | 12p13.31        | 0.135093 | 0.008197 | 0.018575 |
| PPAT       | 4q12            | -0.13507 | 0.008207 | 0.018595 |
| COG5       | 7q22.3          | 0.135068 | 0.008209 | 0.018597 |
| MCMDC2     | 8q13.1          | -0.13506 | 0.008214 | 0.018607 |
| PRDM5      | 4q27            | 0.135    | 0.008242 | 0.018667 |
| EBF2       | 8p21.2          | 0.13499  | 0.008246 | 0.018676 |
| SPC24      | 19p13.2         | -0.13498 | 0.008254 | 0.01869  |
| UNC50      | 2q11.2          | -0.13493 | 0.008275 | 0.018735 |
| ELOVL6     | 4q25            | 0.13493  | 0.008275 | 0.018735 |
| FAM86B3P   | 8p23.1          | -0.13491 | 0.008286 | 0.018756 |
| HAS3       | 16q22.1         | 0.134879 | 0.0083   | 0.018787 |
| C12ORF4    | 12p13.32        | 0.134872 | 0.008303 | 0.018791 |
| LBX2-AS1   | 2p13.1          | -0.13487 | 0.008304 | 0.018791 |
| SMC3       | 10q25.2         | 0.134869 | 0.008305 | 0.018791 |
| ZGRF1      | 4q25            | -0.13484 | 0.008317 | 0.018816 |
| MT1A       | 16q13           | -0.13483 | 0.008321 | 0.018824 |
| NHSL1      | 6q24.1          | 0.134815 | 0.008331 | 0.018844 |
| GGNBP2     | 17q12           | 0.134791 | 0.008343 | 0.018868 |
| CENPJ      | 13q12.12-q12.13 | -0.13478 | 0.008348 | 0.018878 |
| NECTIN2    | 19q13.32        | 0.134765 | 0.008355 | 0.018893 |
| LOC407835  | 7q32.1          | -0.13476 | 0.008358 | 0.018896 |
| GPT2       | 16q11.2         | -0.13476 | 0.00836  | 0.018898 |
| ZNF438     | 10p11.23        | 0.134743 | 0.008366 | 0.018911 |
| JADE1      | 4q28.2          | 0.134686 | 0.008394 | 0.01897  |
| RPS6KA1    | 1p36.11         | -0.13468 | 0.008397 | 0.018975 |
| TOR3A      | 1q25.2          | -0.13466 | 0.008408 | 0.018998 |
| MIR22HG    | 17p13.3         | 0.134642 | 0.008415 | 0.019013 |
| NOG        | 17q22           | 0.134589 | 0.008441 | 0.019069 |
| REXO2      | 11q23.2         | -0.13458 | 0.008448 | 0.019083 |
| PRR4       | 12p13.2         | -0.13455 | 0.008459 | 0.019106 |
| GRIA1      | 5q33.2          | 0.1345   | 0.008485 | 0.019162 |
| H6PD       | 1p36.22         | 0.134471 | 0.0085   | 0.019193 |
| KHDC4      | 1q22            | -0.13444 | 0.008517 | 0.019228 |
| ZNF222     | 19q13.31        | 0.134435 | 0.008517 | 0.019228 |

|            |               |          |          |          |
|------------|---------------|----------|----------|----------|
| B3GNT7     | 2q37.1 2q37.1 | 0.134409 | 0.00853  | 0.019255 |
| ART5       | 11p15.4       | -0.13435 | 0.00856  | 0.01932  |
| AAGAB      | 15q23         | 0.134342 | 0.008564 | 0.019326 |
| KLHL24     | 3q27.1        | 0.134336 | 0.008566 | 0.01933  |
| SCRT1      | 8q24.3        | -0.13429 | 0.008591 | 0.019383 |
| HDHD5-AS1  | 22q11.1       | -0.13428 | 0.008594 | 0.019389 |
| HS6ST2     | Xq26.2        | -0.13427 | 0.008598 | 0.019395 |
| COX18      | 4q13.3        | -0.13427 | 0.008601 | 0.0194   |
| ITGBL1     | 13q33.1       | 0.134228 | 0.00862  | 0.019441 |
| TMEM41B    | 11p15.4       | -0.13422 | 0.008624 | 0.019448 |
| ASPN       | 9q22.31       | 0.134174 | 0.008647 | 0.019497 |
| MALAT1     | 11q13.1       | -0.13412 | 0.008673 | 0.019553 |
| ACSL6      | 5q31.1        | -0.13411 | 0.008677 | 0.019559 |
| CCT2       | 12q15         | -0.13411 | 0.008677 | 0.019559 |
| VCX3A      | Xp22.31       | -0.13411 | 0.00868  | 0.019563 |
| NCR3LG1    | 11p15.1       | 0.134101 | 0.008684 | 0.019569 |
| ASNSD1     | 2q32.2        | -0.13406 | 0.008705 | 0.019614 |
| ERMAP      | 1p34.2        | 0.134058 | 0.008706 | 0.019614 |
| CENPO      | 2p23.3        | -0.13403 | 0.008718 | 0.019638 |
| INSIG2     | 2q14.1-q14.2  | 0.134033 | 0.008718 | 0.019638 |
| RNF138     | 18q12.1       | 0.134028 | 0.008721 | 0.019641 |
| ADHFE1     | 8q13.1        | 0.13401  | 0.00873  | 0.01966  |
| INF2       | 14q32.33      | 0.133983 | 0.008743 | 0.019688 |
| LRRC28     | 15q26.3       | 0.133968 | 0.008751 | 0.019703 |
| PLEKHF1    | 19q12         | -0.13396 | 0.008753 | 0.019705 |
| TATDN3     | 1q32.3        | 0.13395  | 0.00876  | 0.019719 |
| ANKMY1     | 2q37.3        | -0.13394 | 0.008764 | 0.019725 |
| TMCO2      | 1p34.2        | -0.13394 | 0.008766 | 0.019729 |
| PPARD      | 6p21.31       | 0.133934 | 0.008768 | 0.019731 |
| ARL5A      | 2q23.3        | 0.133932 | 0.008769 | 0.019731 |
| CLCN2      | 3q27.1        | -0.13387 | 0.0088   | 0.019797 |
| PRSS36     | 16p11.2       | -0.13387 | 0.008801 | 0.019797 |
| MLLT3      | 9p21.3        | 0.133869 | 0.008802 | 0.019797 |
| ARHGAP17   | 16p12.1       | 0.13386  | 0.008806 | 0.019804 |
| CDH9       | 5p14.1        | -0.13385 | 0.008813 | 0.019817 |
| ITGAX      | 16p11.2       | 0.133837 | 0.008818 | 0.019826 |
| TFDP2      | 3q23          | -0.13381 | 0.008832 | 0.019856 |
| DDAH2      | 6p21.33       | -0.13378 | 0.008848 | 0.019889 |
| SNX4       | 3q21.2        | 0.133744 | 0.008866 | 0.019927 |
| PLAAT3     | 11q12.3-q13.1 | -0.13372 | 0.00888  | 0.019952 |
| C1QL3      | 10p13         | 0.133714 | 0.00888  | 0.019952 |
| USP48      | 1p36.12       | 0.133714 | 0.008881 | 0.019952 |
| SNX24      | 5q23.2        | 0.133713 | 0.008881 | 0.019952 |
| DEPDC1B    | 5q12.1        | -0.13371 | 0.008882 | 0.019952 |
| MAP3K4     | 6q26          | 0.133662 | 0.008907 | 0.020007 |
| CDH10      | 5p14.2-p14.1  | 0.133628 | 0.008925 | 0.020045 |
| GTSF1L     | 20q13.12      | 0.133623 | 0.008928 | 0.020049 |
| GSTO2      | 10q25.1       | -0.13359 | 0.008943 | 0.020079 |
| ZNF677     | 19q13.42      | 0.133593 | 0.008943 | 0.020079 |
| PTP4A2     | 1p35.2        | 0.133569 | 0.008956 | 0.020103 |
| ARPC5      | 1q25.3        | 0.133568 | 0.008956 | 0.020103 |
| GABARAPL1  | 12p13.2       | 0.133566 | 0.008957 | 0.020103 |
| EFR3B      | 2p23.3        | 0.133565 | 0.008958 | 0.020103 |
| C6ORF15    | 6p21.33       | -0.13356 | 0.00896  | 0.020105 |
| LRRC52-AS1 | 1q23.3-q24.1  | -0.13355 | 0.008965 | 0.020114 |
| CDK1       | 10q21.2       | -0.13351 | 0.008985 | 0.020157 |
| FAM117A    | 17q21.33      | -0.13351 | 0.008986 | 0.020157 |
| PBX3       | 9q33.3        | 0.133485 | 0.008999 | 0.020184 |

|              |          |          |          |          |
|--------------|----------|----------|----------|----------|
| TREM1        | 6p21.1   | 0.133474 | 0.009005 | 0.020195 |
| COL10A1      | 6q22.1   | 0.133471 | 0.009006 | 0.020195 |
| BLMH         | 17q11.2  | -0.13347 | 0.009007 | 0.020195 |
| TNPO2        | 19p13.13 | -0.13346 | 0.009009 | 0.020198 |
| GCSAML-AS1   | 1q44     | 0.133437 | 0.009024 | 0.020229 |
| FAM161A      | 2p15     | -0.13343 | 0.009027 | 0.020234 |
| LOC100130093 | 1q42.13  | -0.1334  | 0.009045 | 0.020272 |
| DPYSL4       | 10q26.3  | 0.133388 | 0.00905  | 0.02028  |
| TMEM169      | 2q35     | 0.133379 | 0.009054 | 0.020288 |
| SUPT4H1      | 17q22    | -0.13336 | 0.009064 | 0.020306 |
| CACNA1S      | 1q32.1   | 0.133354 | 0.009067 | 0.020311 |
| RAD51D       | 17q12    | -0.13335 | 0.009068 | 0.020311 |
| INTS2        | 17q23.2  | 0.133347 | 0.009071 | 0.020316 |
| CD59         | 11p13    | 0.133343 | 0.009073 | 0.020318 |
| IL10RB       | 21q22.11 | 0.133317 | 0.009087 | 0.020347 |
| PCLO         | 7q21.11  | 0.133288 | 0.009102 | 0.020379 |
| ORC3         | 6q15     | -0.13322 | 0.009138 | 0.020457 |
| EWSR1        | 22q12.2  | -0.1332  | 0.00915  | 0.020481 |
| ZNF833P      | 19p13.2  | -0.13316 | 0.009168 | 0.020519 |
| SLC25A21     | 14q13.3  | 0.133148 | 0.009176 | 0.020534 |
| HLA-DQB2     | 6p21.32  | 0.133103 | 0.009199 | 0.020585 |
| FAM86EP      | 4p16.3   | -0.1331  | 0.009204 | 0.020593 |
| CENPU        | 4q35.1   | -0.13309 | 0.009208 | 0.0206   |
| FAM169A      | 5q13.3   | 0.133082 | 0.009211 | 0.020603 |
| CFL2         | 14q13.1  | 0.133073 | 0.009215 | 0.020612 |
| INHBA-AS1    | 7p14.1   | 0.13306  | 0.009222 | 0.020625 |
| NT5C3A       | 7p14.3   | -0.13305 | 0.009227 | 0.020634 |
| TTC27        | 2p22.3   | -0.13303 | 0.009238 | 0.020655 |
| MFN1         | 3q26.33  | 0.133023 | 0.009242 | 0.020662 |
| CXCR1        | 2q35     | 0.133018 | 0.009245 | 0.020666 |
| DEK          | 6p22.3   | 0.133016 | 0.009246 | 0.020666 |
| DCAF4L1      | 4p13     | -0.13301 | 0.009247 | 0.020667 |
| TSSK4        | 14q12    | 0.132999 | 0.009255 | 0.020681 |
| TCP1         | 6q25.3   | -0.13299 | 0.009261 | 0.020692 |
| CCL25        | 19p13.2  | -0.13298 | 0.009263 | 0.020695 |
| NCDN         | 1p34.3   | -0.13297 | 0.009272 | 0.020712 |
| SPATA1       | 1p22.3   | 0.132946 | 0.009283 | 0.020736 |
| GRIA3        | Xq25     | 0.132938 | 0.009288 | 0.020743 |
| PRPF39       | 14q21.2  | -0.13292 | 0.009298 | 0.020763 |
| IL17RD       | 3p14.3   | 0.132913 | 0.009301 | 0.020768 |
| FJX1         | 11p13    | -0.1329  | 0.009306 | 0.020778 |
| GBP5         | 1p22.2   | 0.132885 | 0.009316 | 0.020796 |
| DIPK1B       | 9q34.3   | -0.13288 | 0.009317 | 0.020796 |
| CNRIP1       | 2p14     | 0.132876 | 0.00932  | 0.020802 |
| DOK2         | 8p21.3   | 0.132866 | 0.009326 | 0.020813 |
| DENND2C      | 1p13.2   | 0.132859 | 0.00933  | 0.020818 |
| ATP11C       | Xq27.1   | 0.132836 | 0.009342 | 0.020842 |
| HOXB4        | 17q21.32 | 0.132835 | 0.009343 | 0.020842 |
| RAD52        | 12p13.33 | -0.13283 | 0.009343 | 0.020842 |
| NUDT3        | 6p21.31  | -0.13283 | 0.009346 | 0.020845 |
| C16ORF70     | 16q22.1  | -0.13278 | 0.009371 | 0.0209   |
| PHF2P1       | 13q12.11 | -0.13277 | 0.009378 | 0.020913 |
| PBDC1        | Xq13.3   | -0.13274 | 0.009393 | 0.020943 |
| HSPA5        | 9q33.3   | 0.132734 | 0.009397 | 0.02095  |
| LOC653653    | 17q23.1  | 0.132726 | 0.009401 | 0.020957 |
| HCN2         | 19p13.3  | 0.132694 | 0.009418 | 0.020993 |
| ZNF786       | 7q36.1   | -0.13267 | 0.009433 | 0.021023 |
| STARD5       | 15q25.1  | 0.132664 | 0.009435 | 0.021025 |

|           |                 |          |          |          |
|-----------|-----------------|----------|----------|----------|
| UXT-AS1   | Xp11.23         | -0.13264 | 0.009447 | 0.021049 |
| KDM7A-DT  | 7q34            | -0.13261 | 0.009462 | 0.02108  |
| GLDC      | 9p24.1          | -0.13261 | 0.009464 | 0.021083 |
| FRMD8     | 11q13.1         | -0.13261 | 0.009466 | 0.021085 |
| LRRC37A6P | 10p12.1         | 0.132595 | 0.009472 | 0.021097 |
| GNAZ      | 22q11.22-q11.23 | -0.13258 | 0.009479 | 0.021109 |
| GSDME     | 7p15.3          | 0.132581 | 0.00948  | 0.021109 |
| PRKCE     | 2p21            | 0.132567 | 0.009488 | 0.021124 |
| CBX6      | 22q13.1         | 0.132533 | 0.009506 | 0.021163 |
| STOM      | 9q33.2          | 0.132519 | 0.009514 | 0.021178 |
| PARG      | 10q11.23        | 0.132503 | 0.009523 | 0.021195 |
| UPK2      | 11q23.3         | -0.13249 | 0.009529 | 0.021207 |
| KCNA6     | 12p13.32        | 0.132469 | 0.009541 | 0.021231 |
| ANKRD34B  | 5q14.1          | 0.132467 | 0.009542 | 0.021231 |
| CCDC90B   | 11q14.1         | -0.13245 | 0.009553 | 0.021252 |
| FOXD4L1   | 2q14.1          | 0.132431 | 0.009562 | 0.02127  |
| LINC00930 | 15q26.1         | 0.132423 | 0.009566 | 0.021278 |
| HESX1     | 3p14.3          | -0.13242 | 0.009568 | 0.02128  |
| MMGT1     | Xq26.3          | 0.132417 | 0.009569 | 0.02128  |
| SFRP1     | 8p11.21         | 0.132393 | 0.009583 | 0.021308 |
| GPRC5D    | 12p13.1         | 0.132367 | 0.009597 | 0.021336 |
| CYP3A43   | 7q22.1          | -0.13236 | 0.009601 | 0.021343 |
| EIF2S3    | Xp22.11         | -0.13228 | 0.009643 | 0.021433 |
| ISL2      | 15q24.3         | 0.132282 | 0.009644 | 0.021433 |
| CTCFL     | 20q13.31        | -0.13228 | 0.009645 | 0.021434 |
| NUP62CL   | Xq22.3          | -0.13226 | 0.009655 | 0.021454 |
| CHCHD10   | 22q11.23        | -0.13222 | 0.009678 | 0.021501 |
| SNORD1C   | 17q25.1         | -0.13222 | 0.009679 | 0.021502 |
| MFSD5     | 12q13.13        | -0.13221 | 0.009683 | 0.021507 |
| MICU3     | 8p22            | 0.132211 | 0.009683 | 0.021507 |
| TMEM68    | 8q12.1          | -0.13221 | 0.009685 | 0.021508 |
| TCEAL2    | Xq22.1          | 0.132161 | 0.009711 | 0.021564 |
| BTN3A3    | 6p22.2          | 0.132149 | 0.009718 | 0.021576 |
| ERC2      | 3p14.3          | 0.132131 | 0.009728 | 0.021596 |
| NSUN7     | 4p14            | 0.132118 | 0.009735 | 0.02161  |
| ANO4      | 12q23.1         | 0.132109 | 0.00974  | 0.021619 |
| BMP7      | 20q13.31        | -0.13209 | 0.00975  | 0.021638 |
| HELQ      | 4q21.23         | 0.132082 | 0.009755 | 0.021647 |
| SNAP25    | 20p12.2         | 0.132069 | 0.009763 | 0.021661 |
| FOCAD     | 9p21.3          | 0.132064 | 0.009765 | 0.021665 |
| MSL3      | Xp22.2          | -0.13206 | 0.009768 | 0.021668 |
| FKBP3     | 14q21.2         | -0.13201 | 0.009795 | 0.021727 |
| AP4S1     | 14q12           | 0.132007 | 0.009797 | 0.021728 |
| CRIP1     | 14q32.33        | 0.131996 | 0.009803 | 0.02174  |
| C1ORF146  | 1p22.1          | -0.13199 | 0.009806 | 0.021743 |
| YIPF4     | 2p22.3          | 0.131971 | 0.009817 | 0.021766 |
| EID2      | 19q13.2         | -0.13197 | 0.009821 | 0.021771 |
| ENTPD8    | 9q34.3          | 0.131942 | 0.009833 | 0.021797 |
| RGPD5     | 2q13            | 0.131864 | 0.009877 | 0.021892 |
| SRCIN1    | 17q12           | -0.13185 | 0.009886 | 0.021909 |
| USP9X     | Xp11.4          | 0.131827 | 0.009899 | 0.021934 |
| MTHFD2    | 2p13.1          | -0.1318  | 0.009911 | 0.02196  |
| MBD4      | 3q21.3          | 0.131791 | 0.009919 | 0.021974 |
| CPNE4     | 3q22.1          | 0.131772 | 0.009929 | 0.021995 |
| CABP4     | 11q13.2         | 0.13176  | 0.009937 | 0.022007 |
| EFR3A     | 8q24.22         | 0.131758 | 0.009937 | 0.022007 |
| NPHP4     | 1p36.31         | -0.13176 | 0.009939 | 0.022009 |
| AMT       | 3p21.31         | -0.13175 | 0.009941 | 0.02201  |

|           |          |          |          |          |
|-----------|----------|----------|----------|----------|
| HSD17B7   | 1q23.3   | -0.13175 | 0.009942 | 0.02201  |
| ASL       | 7q11.21  | -0.13174 | 0.009945 | 0.022015 |
| ACAD8     | 11q25    | -0.13174 | 0.009948 | 0.022019 |
| CDC26     | 9q32     | -0.13171 | 0.009963 | 0.02205  |
| OR10A2    | 11p15.4  | -0.13169 | 0.009976 | 0.022076 |
| AMOT      | Xq23     | 0.131671 | 0.009987 | 0.022098 |
| LRRC4     | 7q32.1   | 0.131642 | 0.010004 | 0.022132 |
| FOXO3B    | 17p11.2  | 0.131619 | 0.010017 | 0.02216  |
| FGF18     | 5q35.1   | -0.13161 | 0.010021 | 0.022166 |
| EP400P1   | 12q24.33 | -0.13157 | 0.010043 | 0.022213 |
| ERICH4    | 19q13.2  | -0.13155 | 0.010055 | 0.022236 |
| TMPRSS9   | 19p13.3  | -0.13155 | 0.010057 | 0.022239 |
| GALNT8    | 12p13.32 | 0.131519 | 0.010074 | 0.022274 |
| SELENOW   | 19q13.33 | -0.13152 | 0.010075 | 0.022274 |
| UNC80     | 2q34     | 0.131508 | 0.01008  | 0.022282 |
| PYM1      | 12q13.2  | -0.1315  | 0.010082 | 0.022285 |
| SNORA18   | 11q21    | -0.1315  | 0.010085 | 0.022287 |
| ITGA5     | 12q13.13 | 0.131473 | 0.010101 | 0.02232  |
| NSL1      | 1q32.3   | 0.131444 | 0.010117 | 0.022354 |
| NR6A1     | 9q33.3   | -0.13143 | 0.010123 | 0.022365 |
| NPR3      | 5p13.3   | 0.131417 | 0.010133 | 0.022384 |
| WRAP53    | 17p13.1  | -0.1314  | 0.010141 | 0.0224   |
| PI4KAP2   | 22q11.21 | -0.13139 | 0.010147 | 0.02241  |
| NATD1     | 17p11.2  | 0.131382 | 0.010153 | 0.022421 |
| EPST1     | 13q14.11 | -0.13138 | 0.010157 | 0.022427 |
| SUPT20H   | 13q13.3  | -0.13135 | 0.010172 | 0.022458 |
| PDZD3     | 11q23.3  | -0.13132 | 0.010186 | 0.022486 |
| JSRP1     | 19p13.3  | 0.131316 | 0.010191 | 0.022496 |
| TMEM168   | 7q31.1   | 0.131303 | 0.010199 | 0.022507 |
| ACKR4     | 3q22.1   | 0.131302 | 0.010199 | 0.022507 |
| UBE2NL    | Xq27.3   | -0.1313  | 0.0102   | 0.022507 |
| ADORA1    | 1q32.1   | 0.131297 | 0.010202 | 0.02251  |
| ARFIP1    | 4q31.3   | 0.13126  | 0.010224 | 0.022555 |
| DCPS      | 11q24.2  | -0.13121 | 0.010252 | 0.022615 |
| CD3E      | 11q23.3  | 0.131196 | 0.010261 | 0.022632 |
| HYPK      | 15q15.3  | -0.13116 | 0.010281 | 0.022673 |
| TAS2R14   | 12p13.2  | -0.13115 | 0.010289 | 0.022689 |
| TMCC2     | 1q32.1   | 0.131146 | 0.01029  | 0.022689 |
| UBE2A     | Xq24     | -0.13113 | 0.010299 | 0.022706 |
| GJC3      | 7q22.1   | -0.13111 | 0.010312 | 0.022732 |
| BATF2     | 11q13.1  | -0.13106 | 0.01034  | 0.022791 |
| AARD      | 8q24.11  | 0.131053 | 0.010345 | 0.022799 |
| SSH3      | 11q13.2  | -0.13105 | 0.010347 | 0.022802 |
| CA1       | 8q21.2   | 0.131036 | 0.010355 | 0.022816 |
| ZNF571    | 19q13.12 | -0.13103 | 0.010358 | 0.022817 |
| CLEC6A    | 12p13.31 | 0.13103  | 0.010358 | 0.022817 |
| ENG       | 9q34.11  | 0.13103  | 0.010359 | 0.022817 |
| C9ORF40   | 9q21.13  | -0.13103 | 0.010361 | 0.02282  |
| ZNF674    | Xp11.3   | -0.13102 | 0.010365 | 0.022827 |
| TCIRG1    | 11q13.2  | -0.13096 | 0.010397 | 0.022895 |
| GOLGA6L5P | 15q25.2  | 0.130956 | 0.010402 | 0.022903 |
| RXRΒ      | 6p21.32  | -0.13094 | 0.010411 | 0.02292  |
| G6PC2     | 2q31.1   | 0.130911 | 0.010429 | 0.022957 |
| UPB1      | 22q11.23 | -0.1309  | 0.010435 | 0.022969 |
| DACT3     | 19q13.32 | 0.130863 | 0.010457 | 0.023014 |
| GPR63     | 6q16.1   | 0.130861 | 0.010459 | 0.023014 |
| NT5DC2    | 3p21.1   | -0.13086 | 0.010459 | 0.023014 |
| FUT1      | 19q13.33 | -0.13084 | 0.010469 | 0.02303  |



|           |          |          |          |          |
|-----------|----------|----------|----------|----------|
| BEST2     | 19p13.13 | 0.130841 | 0.010471 | 0.02303  |
| LILRB2    | 19q13.42 | 0.130839 | 0.010471 | 0.02303  |
| FSD1      | 19p13.3  | -0.13084 | 0.010472 | 0.02303  |
| CXADRP2   | 15q11.2  | 0.130824 | 0.010481 | 0.023048 |
| MORF4L2   | Xq22.2   | -0.13077 | 0.010511 | 0.023113 |
| PUDP      | Xp22.31  | -0.13077 | 0.010515 | 0.023118 |
| PLBD1     | 12p13.1  | 0.13076  | 0.010519 | 0.023124 |
| ZNF529    | 19q13.12 | -0.13076 | 0.010521 | 0.023126 |
| PTGS2     | 1q31.1   | 0.130747 | 0.010527 | 0.023132 |
| HEYL      | 1p34.2   | 0.130746 | 0.010527 | 0.023132 |
| AKR1C2    | 10p15.1  | -0.13075 | 0.010527 | 0.023132 |
| PRR13     | 12q13.13 | -0.13074 | 0.010531 | 0.023138 |
| CD207     | 2p13.3   | 0.130716 | 0.010545 | 0.023166 |
| MIAT      | 22q12.1  | 0.13071  | 0.010548 | 0.023169 |
| DNASE1L3  | 3p14.3   | 0.13071  | 0.010549 | 0.023169 |
| MLH3      | 14q24.3  | 0.130665 | 0.010576 | 0.023226 |
| ZNF563    | 19p13.2  | -0.13066 | 0.01058  | 0.023233 |
| CCNL1     | 3q25.31  | -0.13065 | 0.010585 | 0.023241 |
| GUCY1B1   | 4q32.1   | 0.130637 | 0.010592 | 0.023255 |
| PELI3     | 11q13.2  | -0.13063 | 0.010597 | 0.023263 |
| FBXO3     | 11p13    | 0.130624 | 0.0106   | 0.023266 |
| LINC00515 | 21q21.3  | -0.13062 | 0.010601 | 0.023266 |
| RHBDD1    | 2q36.3   | 0.130616 | 0.010605 | 0.023272 |
| MOBP      | 3p22.1   | 0.130599 | 0.010615 | 0.023292 |
| NR2C1     | 12q22    | -0.13058 | 0.010628 | 0.023318 |
| NKX2-8    | 14q13.3  | 0.130568 | 0.010634 | 0.023328 |
| CYS1      | 2p25.1   | 0.130565 | 0.010636 | 0.02333  |
| SDF4      | 1p36.33  | -0.13054 | 0.010648 | 0.023354 |
| MARCKSL1  | 1p35.1   | -0.13054 | 0.010649 | 0.023355 |
| DERA      | 12p12.3  | -0.13053 | 0.010658 | 0.023371 |
| OSR1      | 2p24.1   | 0.13052  | 0.010663 | 0.023379 |
| DCTN6     | 8p12     | 0.130515 | 0.010666 | 0.023382 |
| L3HYPDH   | 14q23.1  | -0.13051 | 0.010667 | 0.023382 |
| VNN1      | 6q23.2   | 0.130495 | 0.010678 | 0.023404 |
| CLIP2     | 7q11.23  | 0.130491 | 0.01068  | 0.023407 |
| CCNA1     | 13q13.3  | 0.130482 | 0.010686 | 0.023417 |
| ZNF530    | 19q13.43 | -0.13048 | 0.010689 | 0.023421 |
| CYCS      | 7p15.3   | -0.13046 | 0.010697 | 0.023437 |
| NXPE4     | 11q23.2  | 0.130448 | 0.010707 | 0.023454 |
| KRTAP1-1  | 17q21.2  | -0.13043 | 0.010716 | 0.023473 |
| IGSF11    | 3q13.32  | 0.13042  | 0.010724 | 0.023487 |
| ELAC1     | 18q21.2  | 0.130403 | 0.010734 | 0.023506 |
| OSCP1     | 1p34.3   | -0.13039 | 0.01074  | 0.023518 |
| HYAL2     | 3p21.31  | -0.13038 | 0.01075  | 0.023538 |
| NFKBID    | 19q13.12 | -0.13036 | 0.010758 | 0.023551 |
| CRMP1     | 4p16.2   | 0.130358 | 0.010761 | 0.023556 |
| KIAA0319  | 6p22.3   | 0.130347 | 0.010768 | 0.023568 |
| CBARP     | 19p13.3  | -0.13034 | 0.010773 | 0.023577 |
| CCT8      | 21q21.3  | -0.13033 | 0.010776 | 0.02358  |
| CNPPD1    | 2q35     | -0.13033 | 0.010781 | 0.023589 |
| CSRNP1    | 3p22.2   | 0.130316 | 0.010786 | 0.023598 |
| BCL11B    | 14q32.2  | -0.1303  | 0.010796 | 0.023616 |
| PRDM7     | 16q24.3  | -0.1303  | 0.010799 | 0.023621 |
| ATP5F1A   | 18q21.1  | 0.130288 | 0.010804 | 0.023628 |
| DZIP3     | 3q13.13  | 0.130284 | 0.010806 | 0.023631 |
| PARP11    | 12p13.32 | 0.130272 | 0.010814 | 0.023645 |
| ZCRB1     | 12q12    | -0.13026 | 0.010823 | 0.023659 |
| CRYBB2    | 22q11.23 | -0.13026 | 0.010823 | 0.023659 |

|             |                       |          |          |          |
|-------------|-----------------------|----------|----------|----------|
| EIF3J       | 15q21.1               | 0.130256 | 0.010824 | 0.023659 |
| ZNF345      | 19q13.12              | -0.13022 | 0.010848 | 0.02371  |
| GRIN1       | 9q34.3                | 0.130212 | 0.01085  | 0.023712 |
| KRT9        | 17q21.2               | 0.130207 | 0.010853 | 0.023717 |
| CNFN        | 19q13.2               | -0.13014 | 0.010896 | 0.023807 |
| TLE6        | 19p13.3               | 0.130111 | 0.010912 | 0.02384  |
| CEP44       | 4q34.1                | -0.13011 | 0.010916 | 0.023841 |
| GLIS2       | 16p13.3               | 0.130105 | 0.010916 | 0.023841 |
| PKDCC       | 2p21                  | -0.1301  | 0.010918 | 0.023841 |
| MTBP        | 8q24.12               | -0.1301  | 0.010918 | 0.023841 |
| SFRP2       | 4q31.3                | 0.130083 | 0.010929 | 0.023864 |
| TAS2R5      | 7q34                  | -0.13008 | 0.010932 | 0.023866 |
| RUFY1       | 5q35.3                | 0.130079 | 0.010932 | 0.023866 |
| LRRC24      | 8q24.3                | -0.13008 | 0.010934 | 0.023866 |
| SHANK1      | 19q13.33              | 0.130064 | 0.010941 | 0.02388  |
| GPAT3       | 4q21.23               | 0.130034 | 0.01096  | 0.023918 |
| SMG1P3      | 16p12.2               | 0.130024 | 0.010966 | 0.023929 |
| STX7        | 6q23.2                | 0.130003 | 0.010979 | 0.023954 |
| RAP1GAP     | 1p36.12               | 0.129972 | 0.010998 | 0.023994 |
| UGT2B11     | 4q13.2                | 0.129969 | 0.011001 | 0.023996 |
| ECRG4       | 2q12.2                | 0.129967 | 0.011002 | 0.023996 |
| POFUT2      | 21q22.3               | -0.12996 | 0.011004 | 0.023998 |
| ORC4        | 2q23.1                | -0.12995 | 0.011014 | 0.024014 |
| KLHL34      | Xp22.12               | 0.129945 | 0.011015 | 0.024014 |
| SEMA5A      | 5p15.31               | 0.129945 | 0.011015 | 0.024014 |
| KCNK5       | 6p21.2                | -0.12994 | 0.011016 | 0.024014 |
| IGFL2       | 19q13.32              | 0.129905 | 0.01104  | 0.024064 |
| GIMAP5      | 7q36.1                | 0.129903 | 0.011041 | 0.024064 |
| FXN         | 9q21.11               | -0.1299  | 0.011045 | 0.024069 |
| AHRR        | 5p15.33               | 0.129852 | 0.011073 | 0.024129 |
| ST8SIA2     | 15q26.1               | 0.129845 | 0.011077 | 0.024135 |
| ATOH7       | 10q21.3 10q21.3-q22.1 | -0.1298  | 0.011105 | 0.024192 |
| PMS2P4      | 7q11.21               | -0.12978 | 0.011117 | 0.024216 |
| SENP6       | 6q14.1                | 0.129755 | 0.011134 | 0.02425  |
| HDGF        | 1q23.1                | -0.12975 | 0.011137 | 0.024253 |
| FNTB        | 14q23.3               | 0.129736 | 0.011146 | 0.02427  |
| TCF3        | 19p13.3               | -0.12971 | 0.01116  | 0.024298 |
| TUBB3       | 16q24.3               | -0.12971 | 0.011162 | 0.024298 |
| NDUFA9      | 12p13.32              | -0.12971 | 0.011162 | 0.024298 |
| MGAT3       | 22q13.1               | 0.129678 | 0.011183 | 0.02434  |
| PLEKHH1     | 14q24.1               | 0.129661 | 0.011193 | 0.024358 |
| SEMA6B      | 19p13.3               | 0.129661 | 0.011193 | 0.024358 |
| HYPM        | Xp11.4                | -0.12964 | 0.011207 | 0.024386 |
| P3H2        | 3q28                  | 0.129613 | 0.011224 | 0.024419 |
| PCDHB14     | 5q31.3                | 0.129601 | 0.011231 | 0.024433 |
| RALA        | 7p14.1                | -0.12959 | 0.011241 | 0.024451 |
| CCT6B       | 17q12                 | -0.12951 | 0.011288 | 0.02455  |
| C5ORF52     | 5q33.3                | 0.129489 | 0.011302 | 0.024578 |
| CERS2       | 1q21.3                | 0.129479 | 0.011308 | 0.024589 |
| CSNK1G2-AS1 | 19p13.3               | 0.129478 | 0.011309 | 0.024589 |
| HAND2-AS1   | 4q34.1                | 0.129468 | 0.011316 | 0.0246   |
| DRAM1       | 12q23.2               | 0.129395 | 0.011362 | 0.024698 |
| TNFSF18     | 1q25.1                | 0.12939  | 0.011365 | 0.024702 |
| PIK3IP1     | 22q12.2               | 0.129381 | 0.011371 | 0.024713 |
| IL12RB2     | 1p31.3                | 0.129364 | 0.011382 | 0.024734 |
| NEU3        | 11q13.4               | 0.129352 | 0.01139  | 0.024748 |
| MTIF2       | 2p16.1                | -0.12935 | 0.011392 | 0.02475  |
| CLEC14A     | 14q21.1               | 0.129337 | 0.011399 | 0.024762 |

|            |          |          |          |          |
|------------|----------|----------|----------|----------|
| COIL       | 17q22    | -0.12933 | 0.0114   | 0.024763 |
| WWC2       | 4q35.1   | 0.129314 | 0.011414 | 0.024789 |
| ZNRF3      | 22q12.1  | -0.12928 | 0.011438 | 0.024839 |
| SEMA3G     | 3p21.1   | 0.129272 | 0.011441 | 0.024842 |
| C2CD6      | 2q33.1   | 0.129241 | 0.011461 | 0.024883 |
| CPLANE2    | 1p36.13  | -0.12922 | 0.011474 | 0.02491  |
| MYH13      | 17p13.1  | 0.129195 | 0.01149  | 0.024942 |
| RBPM52     | 15q22.31 | 0.129174 | 0.011504 | 0.024969 |
| SPARC      | 5q33.1   | 0.129164 | 0.01151  | 0.024981 |
| BDNF       | 11p14.1  | 0.129157 | 0.011515 | 0.024985 |
| LARP1      | 5q33.2   | 0.129157 | 0.011515 | 0.024985 |
| CSPG4      | 15q24.2  | 0.129155 | 0.011516 | 0.024985 |
| CST2       | 20p11.21 | 0.129127 | 0.011534 | 0.025021 |
| CHURC1     | 14q23.3  | 0.129126 | 0.011535 | 0.025021 |
| GLYR1      | 16p13.3  | 0.129118 | 0.01154  | 0.025028 |
| DCLRE1C    | 10p13    | -0.12911 | 0.011546 | 0.025039 |
| TBCK       | 4q24     | 0.129087 | 0.01156  | 0.025067 |
| PFKFB1     | Xp11.21  | -0.12909 | 0.011561 | 0.025067 |
| CCDC144CP  | 17p11.2  | 0.129074 | 0.011569 | 0.02508  |
| BTG2       | 1q32.1   | 0.129066 | 0.011574 | 0.025089 |
| PGBD5      | 1q42.13  | 0.129055 | 0.011581 | 0.025101 |
| LRRC69     | 8q21.3   | -0.12905 | 0.011582 | 0.025101 |
| CCN2       | 6q23.2   | 0.129044 | 0.011588 | 0.025111 |
| LINC00847  | 5q35.3   | 0.129038 | 0.011592 | 0.025117 |
| SRMS       | 20q13.33 | 0.129026 | 0.0116   | 0.025129 |
| METTL21EP  | 13q33.1  | -0.12903 | 0.0116   | 0.025129 |
| IRF2BPL    | 14q24.3  | 0.129021 | 0.011603 | 0.025133 |
| LINC01881  | 2q37.3   | 0.129    | 0.011617 | 0.025159 |
| C1QB       | 1p36.12  | 0.128998 | 0.011618 | 0.025159 |
| SNORA84    | 9q22.31  | -0.12898 | 0.011627 | 0.025176 |
| RASD1      | 17p11.2  | 0.128978 | 0.011631 | 0.025183 |
| RAET1L     | 6q25.1   | 0.128938 | 0.011657 | 0.025236 |
| NUTM2A-AS1 | 10q23.2  | -0.12886 | 0.011709 | 0.025344 |
| SNORA53    | 12q23.1  | -0.12886 | 0.01171  | 0.025344 |
| CHRM2      | 7q33     | 0.128741 | 0.011787 | 0.025509 |
| CPSF6      | 12q15    | 0.128731 | 0.011793 | 0.025517 |
| MZF1-AS1   | 19q13.43 | 0.128731 | 0.011793 | 0.025517 |
| RAB3C      | 5q11.2   | 0.128674 | 0.011831 | 0.025597 |
| TRIM66     | 11p15.4  | -0.12867 | 0.011836 | 0.025601 |
| CCNF       | 16p13.3  | -0.12867 | 0.011836 | 0.025601 |
| RARA       | 17q21.2  | -0.12865 | 0.011845 | 0.025617 |
| MAGEA6     | Xq28     | -0.12864 | 0.011852 | 0.02563  |
| FAAP24     | 19q13.11 | -0.12862 | 0.01187  | 0.025666 |
| CMTR2      | 16q22.2  | 0.128607 | 0.011875 | 0.025675 |
| TAOK2      | 16p11.2  | 0.128598 | 0.011882 | 0.025686 |
| CCDC47     | 17q23.3  | 0.128586 | 0.011889 | 0.0257   |
| TUB        | 11p15.4  | 0.128575 | 0.011897 | 0.025712 |
| SLC44A3    | 1p21.3   | 0.128574 | 0.011898 | 0.025712 |
| CHRNA5     | 15q25.1  | 0.128571 | 0.0119   | 0.025714 |
| ANGPTL6    | 19p13.2  | -0.12857 | 0.011902 | 0.025715 |
| PIGV       | 1p36.11  | -0.12856 | 0.011905 | 0.025719 |
| C11ORF21   | 11p15.5  | 0.128554 | 0.011911 | 0.02573  |
| AFP        | 4q13.3   | -0.12854 | 0.011917 | 0.02574  |
| LY96       | 8q21.11  | 0.128541 | 0.011919 | 0.025743 |
| ABL1       | 9q34.12  | 0.128519 | 0.011934 | 0.025772 |
| ZNF547     | 19q13.43 | -0.12849 | 0.011956 | 0.025816 |
| SFT2D2     | 1q24.2   | 0.128464 | 0.011971 | 0.025846 |
| KDM1B      | 6p22.3   | 0.128421 | 0.012    | 0.025905 |

|                 |                 |          |          |          |
|-----------------|-----------------|----------|----------|----------|
| EBF3            | 10q26.3         | 0.128402 | 0.012013 | 0.02593  |
| FCRL4           | 1q23.1          | 0.128399 | 0.012015 | 0.025931 |
| SUV39H2         | 10p13           | -0.1284  | 0.012016 | 0.025931 |
| GASK1A          | 3p22.1          | 0.12837  | 0.012034 | 0.025968 |
| AJM1            | 9q34.3          | 0.128324 | 0.012065 | 0.026031 |
| TNFRSF13C       | 22q13.2         | 0.128319 | 0.012068 | 0.026036 |
| HYAL3           | 3p21.31         | -0.12831 | 0.012077 | 0.026052 |
| LRRN4           | 20p12.3         | -0.1283  | 0.012083 | 0.026062 |
| RAB33A          | Xq26.1          | 0.128275 | 0.012098 | 0.026092 |
| INGX            | Xq13.1          | -0.12826 | 0.012108 | 0.02611  |
| TNIP1           | 5q33.1          | 0.128226 | 0.012132 | 0.026158 |
| B3GNT2          | 2p15            | 0.128206 | 0.012145 | 0.026184 |
| MAS1L           | 6p22.1          | 0.12816  | 0.012176 | 0.026249 |
| SLX4            | 16p13.3         | 0.12814  | 0.01219  | 0.026275 |
| SLC43A3         | 11q12.1         | 0.128129 | 0.012197 | 0.026289 |
| KLF17           | 1p34.1          | 0.128101 | 0.012216 | 0.026327 |
| FNTA            | 8p11.21         | -0.1281  | 0.01222  | 0.02633  |
| ACIN1           | 14q11.2         | 0.128094 | 0.012221 | 0.02633  |
| HPCAL4          | 1p34.2          | 0.128084 | 0.012228 | 0.026342 |
| DOK5            | 20q13.2         | 0.128081 | 0.01223  | 0.026342 |
| UFC1            | 1q23.3          | -0.12808 | 0.01223  | 0.026342 |
| SNX15           | 11q13.1         | -0.12808 | 0.012232 | 0.026344 |
| CDCA7           | 2q31.1          | -0.12807 | 0.012234 | 0.026346 |
| TCAF2           | 7q35            | 0.128066 | 0.01224  | 0.026356 |
| ARPC3           | 12q24.11        | -0.12805 | 0.012251 | 0.026376 |
| SEPHS1P1        | 7q11.21         | -0.12804 | 0.012255 | 0.026381 |
| VTCN1           | 1p13.1-p12      | 0.128041 | 0.012257 | 0.026384 |
| CD1A            | 1q23.1          | 0.127999 | 0.012286 | 0.026443 |
| ZC3H8           | 2q14.1          | -0.12796 | 0.01231  | 0.026493 |
| KCNQ3           | 8q24.22         | 0.12793  | 0.012333 | 0.026538 |
| CBFA2T2         | 20q11.21-q11.22 | -0.12792 | 0.01234  | 0.02655  |
| LEPROTL1        | 8p12            | 0.127913 | 0.012345 | 0.026558 |
| PRRT3           | 3p25.3          | -0.1279  | 0.012354 | 0.026574 |
| DDHD2           | 8p11.23         | 0.127888 | 0.012362 | 0.02659  |
| PLCD3           | 17q21.31        | 0.12787  | 0.012375 | 0.026613 |
| RBM12           | 20q11.22        | 0.127863 | 0.01238  | 0.026621 |
| NPR2            | 9p13.3          | 0.127792 | 0.012428 | 0.026722 |
| RNF20           | 9q31.1          | 0.127791 | 0.012429 | 0.026722 |
| DHRS7B          | 17p11.2         | -0.12777 | 0.012442 | 0.026747 |
| UBA6            | 4q13.2          | 0.127769 | 0.012444 | 0.026749 |
| GDF3            | 12p13.31        | 0.127764 | 0.012448 | 0.026754 |
| TCP10L2         | 6q27            | -0.12776 | 0.012451 | 0.026755 |
| UTF1            | 10q26.3         | -0.12776 | 0.012452 | 0.026755 |
| CMA1            | 14q12           | 0.127757 | 0.012452 | 0.026755 |
| SCG3            | 15q21.2         | 0.127748 | 0.012459 | 0.026764 |
| KIF27           | 9q21.32         | 0.127748 | 0.012459 | 0.026764 |
| BHLHE22         | 8q12.3          | 0.127711 | 0.012484 | 0.026815 |
| C5ORF56         | 5q31.1          | -0.12771 | 0.012488 | 0.026819 |
| LUZP6           | 7q33            | 0.127659 | 0.012521 | 0.026888 |
| MYL2            | 12q24.11        | 0.127651 | 0.012526 | 0.026897 |
| MAPK12          | 22q13.33        | -0.12764 | 0.012531 | 0.026903 |
| LIMS3-LOC440895 | 2q13            | -0.12764 | 0.012534 | 0.026908 |
| AZGP1           | 7q22.1          | -0.1276  | 0.012565 | 0.026971 |
| RPS28           | 19p13.2         | -0.12756 | 0.012589 | 0.027019 |
| CCBE1           | 18q21.32        | 0.127554 | 0.012594 | 0.027024 |
| SERPING1        | 11q12.1         | 0.127553 | 0.012595 | 0.027024 |
| KIF26A          | 14q32.33        | 0.127553 | 0.012595 | 0.027024 |
| ADGRD1          | 12q24.33        | 0.127543 | 0.012602 | 0.027036 |

|            |          |          |          |          |
|------------|----------|----------|----------|----------|
| SPIDR      | 8q11.21  | -0.12752 | 0.012617 | 0.027065 |
| ST6GALNAC3 | 1p31.1   | 0.127437 | 0.012676 | 0.02719  |
| UNK        | 17q25.1  | -0.12742 | 0.012688 | 0.027211 |
| AGO1       | 1p34.3   | 0.127416 | 0.012691 | 0.027215 |
| CNOT9      | 2q35     | 0.127392 | 0.012708 | 0.027249 |
| TCEAL6     | Xq22.1   | 0.127354 | 0.012735 | 0.027303 |
| IL27RA     | 19p13.12 | 0.127325 | 0.012755 | 0.027345 |
| SNORD15A   | 11q13.4  | -0.12732 | 0.012762 | 0.027356 |
| NAA50      | 3q13.31  | 0.127272 | 0.012792 | 0.027416 |
| CYB5D2     | 17p13.2  | 0.127272 | 0.012793 | 0.027416 |
| PLEKHO2    | 15q22.31 | 0.127256 | 0.012804 | 0.027438 |
| TEX38      | 1p33     | -0.12724 | 0.012817 | 0.027461 |
| NR1D1      | 17q21.1  | -0.12721 | 0.012838 | 0.027503 |
| CROCCP3    | 1p36.13  | -0.12718 | 0.012859 | 0.027546 |
| NEDD1      | 12q23.1  | 0.127177 | 0.01286  | 0.027546 |
| HCFC1R1    | 16p13.3  | -0.12712 | 0.012904 | 0.027636 |
| SPATA5L1   | 15q21.1  | 0.127103 | 0.012913 | 0.027654 |
| ZNHIT6     | 1p22.3   | 0.127089 | 0.012924 | 0.027672 |
| ANO8       | 19p13.11 | 0.127083 | 0.012927 | 0.027678 |
| F2RL3      | 19p13.11 | 0.127066 | 0.01294  | 0.027701 |
| TRIM10     | 6p22.1   | 0.127002 | 0.012985 | 0.027793 |
| TCAM1P     | 17q23.3  | -0.127   | 0.012986 | 0.027793 |
| GAS2L1     | 22q12.2  | 0.126993 | 0.012992 | 0.027802 |
| KIAA1257   | 3q21.3   | -0.12699 | 0.012993 | 0.027802 |
| ZPBP       | 7p12.2   | -0.12699 | 0.012995 | 0.027804 |
| UBE2G2     | 21q22.3  | -0.12695 | 0.013022 | 0.027859 |
| CATSPER4   | 1p36.11  | -0.12695 | 0.013025 | 0.027863 |
| CEND1      | 11p15.5  | 0.12693  | 0.013037 | 0.027885 |
| NACA4P     | 8q22.3   | -0.12693 | 0.013038 | 0.027885 |
| ATP6V1E1   | 22q11.21 | -0.12692 | 0.013045 | 0.027896 |
| SRRD       | 22q12.1  | -0.1269  | 0.013056 | 0.027917 |
| HSFX2      | Xq28     | -0.12689 | 0.013068 | 0.027939 |
| HABP2      | 10q25.3  | 0.126881 | 0.013073 | 0.027948 |
| KDM4C      | 9p24.1   | 0.126874 | 0.013078 | 0.027956 |
| TGFB3      | 14q24.3  | 0.126863 | 0.013086 | 0.027969 |
| STK32C     | 10q26.3  | -0.12686 | 0.013087 | 0.027969 |
| LURAP1     | 1p34.1   | 0.126809 | 0.013125 | 0.028047 |
| SUN3       | 7p12.3   | -0.1268  | 0.013135 | 0.028065 |
| HTR3C      | 3q27.1   | 0.126793 | 0.013137 | 0.028066 |
| MED12L     | 3q25.1   | 0.126783 | 0.013144 | 0.028078 |
| NUDT13     | 10q22.2  | -0.12677 | 0.013156 | 0.028101 |
| MAP3K7     | 6q15     | 0.126755 | 0.013164 | 0.028116 |
| B3GALNT2   | 1q42.3   | 0.126742 | 0.013174 | 0.028133 |
| SLCO4C1    | 5q21.1   | 0.126736 | 0.013178 | 0.02814  |
| ARRDC5     | 19p13.3  | 0.126723 | 0.013187 | 0.028156 |
| BRF2       | 8p11.23  | -0.12671 | 0.013196 | 0.028172 |
| BUB1B      | 15q15.1  | 0.126703 | 0.013203 | 0.028182 |
| KIF11      | 10q23.33 | 0.126683 | 0.013217 | 0.028209 |
| LY6G5C     | 6p21.33  | -0.12668 | 0.013218 | 0.028209 |
| ZSWIM7     | 17p12    | -0.12664 | 0.013248 | 0.028269 |
| LYNX1      | 8q24.3   | 0.126639 | 0.013249 | 0.028269 |
| SNAI3-AS1  | 16q24.2  | -0.12662 | 0.013259 | 0.028289 |
| TRMT10C    | 3q12.3   | -0.12662 | 0.013261 | 0.02829  |
| ITGB5      | 3q21.2   | 0.126612 | 0.013269 | 0.028302 |
| UBP1       | 3p22.3   | 0.126606 | 0.013273 | 0.02831  |
| TMEM184A   | 7p22.3   | -0.1266  | 0.013281 | 0.028322 |
| MEFV       | 16p13.3  | 0.126594 | 0.013282 | 0.028322 |
| SYF2       | 1p36.11  | -0.12658 | 0.013289 | 0.028332 |

|            |                        |          |          |          |
|------------|------------------------|----------|----------|----------|
| UBA6-AS1   | 4q13.2                 | -0.12658 | 0.013289 | 0.028332 |
| ST6GALNAC2 | 17q25.1                | 0.126578 | 0.013293 | 0.028337 |
| SNORA49    | 12q24.33               | -0.12658 | 0.013295 | 0.028338 |
| VTA1       | 6q24.1-q24.2           | 0.126555 | 0.01331  | 0.028367 |
| SIRPG      | 20p13                  | 0.126551 | 0.013314 | 0.028371 |
| KCND1      | Xp11.23                | 0.126527 | 0.013331 | 0.028405 |
| CALCR      | 7q21.3                 | 0.126474 | 0.01337  | 0.028486 |
| XPC        | 3p25.1                 | 0.126428 | 0.013405 | 0.028556 |
| TRIM14     | 9q22.33                | 0.126413 | 0.013415 | 0.028575 |
| TMEM52B    | 12p13.2                | 0.1264   | 0.013425 | 0.028593 |
| POPDC3     | 6q21                   | 0.126393 | 0.01343  | 0.028602 |
| DUBR       | 3q13.12                | 0.126386 | 0.013435 | 0.028609 |
| LZTR1      | 22q11.21 22q11.1-q11.2 | -0.12638 | 0.013442 | 0.028621 |
| HCN4       | 15q24.1                | 0.126373 | 0.013445 | 0.028624 |
| NKX3-1     | 8p21.2                 | 0.126365 | 0.013451 | 0.028633 |
| ADAMTS6    | 5q12.3                 | 0.12635  | 0.013462 | 0.028654 |
| CRYBA1     | 17q11.2                | -0.12633 | 0.013474 | 0.028674 |
| CALB1      | 8q21.3                 | 0.126333 | 0.013474 | 0.028674 |
| DEFA1B     | 8p23.1                 | -0.12633 | 0.013478 | 0.028678 |
| RWDD2A     | 6q14.1                 | -0.12632 | 0.013486 | 0.028692 |
| TTC21B     | 2q24.3                 | 0.126302 | 0.013497 | 0.028714 |
| INA        | 10q24.33               | 0.126274 | 0.013518 | 0.028755 |
| ANAPC1     | 2q13                   | 0.126264 | 0.013526 | 0.028768 |
| CCDC60     | 12q24.23               | 0.126259 | 0.013529 | 0.028773 |
| YIPF6      | Xq12-q13.1             | 0.12625  | 0.013537 | 0.028785 |
| C11ORF42   | 11p15.4                | 0.126239 | 0.013545 | 0.0288   |
| TSHR       | 14q31.1                | 0.126222 | 0.013557 | 0.028823 |
| SPATA12    | 3p14.3                 | -0.12619 | 0.013579 | 0.028867 |
| MPI        | 15q24.1                | 0.126189 | 0.013582 | 0.02887  |
| COLEC11    | 2p25.3                 | -0.12616 | 0.013603 | 0.028912 |
| WIF1       | 12q14.3                | -0.12616 | 0.013605 | 0.028912 |
| RCAN1      | 21q22.12               | 0.126155 | 0.013608 | 0.028913 |
| RPRD1B     | 20q11.23               | -0.12615 | 0.013608 | 0.028913 |
| CATSPER2   | 15q15.3                | -0.12612 | 0.013633 | 0.028962 |
| CD274      | 9p24.1                 | 0.126118 | 0.013635 | 0.028964 |
| ATXN7L3    | 17q21.31               | -0.12611 | 0.013638 | 0.028966 |
| SYT17      | 16p12.3                | 0.126109 | 0.013642 | 0.028972 |
| CHST5      | 16q23.1                | 0.126102 | 0.013647 | 0.02898  |
| GLCE       | 15q23                  | 0.126087 | 0.013658 | 0.029    |
| SMOX       | 20p13                  | -0.12609 | 0.013659 | 0.029    |
| UBE2Q2P2   | 15q25.2                | 0.126081 | 0.013663 | 0.029005 |
| HIST1H3H   | 6p22.1                 | -0.12606 | 0.013677 | 0.029032 |
| ZNF257     | 19p12                  | 0.126053 | 0.013684 | 0.029043 |
| CBX7       | 22q13.1                | 0.126029 | 0.013702 | 0.029079 |
| GFPT2      | 5q35.3                 | 0.126027 | 0.013704 | 0.029079 |
| SERPINF1   | 17p13.3                | 0.126024 | 0.013706 | 0.02908  |
| NEIL3      | 4q34.3                 | -0.12601 | 0.013717 | 0.029101 |
| LEFTY1     | 1q42.12                | 0.125995 | 0.013728 | 0.029121 |
| SOWAHC     | 2q13                   | 0.125989 | 0.013732 | 0.029127 |
| HNRNPA1    | 12q13.13               | -0.12598 | 0.013738 | 0.029136 |
| BDKRB2     | 14q32.2                | 0.125972 | 0.013745 | 0.029146 |
| MYH4       | 17p13.1                | -0.12597 | 0.013746 | 0.029146 |
| CD19       | 16p11.2                | 0.125906 | 0.013795 | 0.029247 |
| KMO        | 1q43                   | 0.125905 | 0.013796 | 0.029247 |
| NAT1       | 8p22                   | 0.125895 | 0.013804 | 0.02926  |
| RBMXL2     | 11p15.4                | -0.12589 | 0.013807 | 0.029265 |
| YIPF1      | 1p32.3                 | -0.12588 | 0.013815 | 0.029277 |
| NFKBIZ     | 3q12.3                 | 0.125852 | 0.013836 | 0.02932  |

|              |              |          |          |          |
|--------------|--------------|----------|----------|----------|
| GOS2         | 1q32.2       | -0.12584 | 0.013843 | 0.029331 |
| PINX1        | 8p23.1       | -0.12583 | 0.01385  | 0.029341 |
| FBXL4        | 6q16.1-q16.2 | 0.125833 | 0.013851 | 0.029341 |
| RAB40B       | 17q25.3      | -0.12583 | 0.013856 | 0.029349 |
| SCARF1       | 17p13.3      | 0.125822 | 0.013859 | 0.029352 |
| ATF6B        | 6p21.32      | -0.12581 | 0.013866 | 0.029365 |
| STK11        | 19p13.3      | -0.1258  | 0.013877 | 0.029385 |
| COPG2        | 7q32.2       | -0.12577 | 0.013896 | 0.029421 |
| OR3A2        | 17p13.3      | 0.125695 | 0.013956 | 0.029545 |
| CALML3       | 10p15.1      | -0.12565 | 0.013993 | 0.02962  |
| FOXQ1        | 6p25.3       | -0.12563 | 0.014008 | 0.029648 |
| GPBP1L1      | 1p34.1       | 0.12562  | 0.014013 | 0.029657 |
| FBXO41       | 2p13.2       | -0.12561 | 0.014019 | 0.029666 |
| SNORD89      | 2q11.2       | -0.1256  | 0.014029 | 0.029684 |
| SLC22A15     | 1p13.1       | 0.125595 | 0.014033 | 0.029689 |
| CYB5R4       | 6q14.2       | 0.125564 | 0.014057 | 0.029736 |
| DTHD1        | 4p14         | 0.125532 | 0.014081 | 0.029785 |
| DEPDC4       | 12q23.1      | -0.12553 | 0.014084 | 0.029789 |
| RASAL3       | 19p13.12     | 0.125524 | 0.014088 | 0.029793 |
| SLC35F3      | 1q42.2       | 0.125519 | 0.014091 | 0.029797 |
| RERG         | 12p12.3      | 0.125491 | 0.014113 | 0.029838 |
| ZNF365       | 10q21.2      | 0.12549  | 0.014114 | 0.029838 |
| GRID2IP      | 7p22.1       | -0.12546 | 0.014135 | 0.029879 |
| ATG4C        | 1p31.3       | 0.125461 | 0.014136 | 0.029879 |
| SLC9A8       | 20q13.13     | -0.12543 | 0.014161 | 0.029929 |
| CRTAC1       | 10q24.2      | 0.125404 | 0.014181 | 0.029967 |
| NR4A3        | 9q31.1       | 0.125385 | 0.014195 | 0.029995 |
| FOXA3        | 19q13.32     | 0.125375 | 0.014203 | 0.030008 |
| SERPINA5     | 14q32.13     | 0.125351 | 0.014222 | 0.030045 |
| RING1        | 6p21.32      | -0.12533 | 0.014237 | 0.030074 |
| LRRN3        | 7q31.1       | 0.125251 | 0.0143   | 0.030202 |
| ISM1         | 20p12.1      | 0.12525  | 0.014301 | 0.030202 |
| DNAJB12      | 10q22.1      | -0.1252  | 0.014337 | 0.030275 |
| TTLL5        | 14q24.3      | 0.125182 | 0.014354 | 0.030308 |
| PLEKHB1      | 11q13.4      | -0.12518 | 0.014358 | 0.030313 |
| PCDHB13      | 5q31.3       | 0.125161 | 0.014371 | 0.030336 |
| CDIPTOSP     | 16p11.2      | -0.12513 | 0.014392 | 0.030378 |
| ZC2HC1A      | 8q21.13      | 0.125122 | 0.014401 | 0.030395 |
| NBPF7        | 1p12         | 0.125052 | 0.014457 | 0.030508 |
| MALL         | 2q13         | 0.125042 | 0.014464 | 0.030522 |
| RNASE2       | 14q11.2      | 0.12504  | 0.014466 | 0.030522 |
| ELP4         | 11p13        | -0.12502 | 0.014485 | 0.030555 |
| TTC30A       | 2q31.2       | 0.125016 | 0.014485 | 0.030555 |
| SLC23A3      | 2q35         | -0.12497 | 0.01452  | 0.030626 |
| DIO3OS       | 14q32.31     | -0.12497 | 0.014525 | 0.030632 |
| TM4SF18      | 3q25.1       | 0.12495  | 0.014537 | 0.030656 |
| HDAC6        | Xp11.23      | -0.12495 | 0.014541 | 0.03066  |
| KPNA1        | 3q21.1       | 0.124937 | 0.014547 | 0.03067  |
| RPL41        | 12q13.2      | -0.12493 | 0.014552 | 0.030676 |
| ATP6V0E2     | 7q36.1       | -0.12492 | 0.01456  | 0.030689 |
| ACTN3        | 11q13.2      | 0.124921 | 0.014561 | 0.030689 |
| MAGED4B      | Xp11.22      | 0.124889 | 0.014586 | 0.030739 |
| LIMD1        | 3p21.31      | 0.12488  | 0.014593 | 0.030751 |
| LOC100133920 | 2q11.1       | -0.12486 | 0.014609 | 0.030782 |
| ZNF418       | 19q13.43     | 0.124824 | 0.014638 | 0.030838 |
| RND1         | 12q13.12     | 0.124808 | 0.01465  | 0.030862 |
| TMEM204      | 16p13.3      | 0.124758 | 0.01469  | 0.030942 |
| KCTD21       | 11q14.1      | 0.124722 | 0.014719 | 0.031    |

|                 |          |          |          |          |
|-----------------|----------|----------|----------|----------|
| CORO2A          | 9q22.33  | 0.124709 | 0.01473  | 0.031019 |
| FAM163A         | 1q25.2   | 0.1247   | 0.014737 | 0.031031 |
| CLDN6           | 16p13.3  | -0.12468 | 0.014752 | 0.03106  |
| ORAI3           | 16p11.2  | -0.12467 | 0.014762 | 0.031077 |
| NOX4            | 11q14.3  | 0.124666 | 0.014765 | 0.031079 |
| LOC100131496    | 20q13.12 | -0.12465 | 0.014779 | 0.031107 |
| KCNE4           | 2q36.1   | 0.124641 | 0.014784 | 0.031112 |
| OPHN1           | Xq12     | 0.124641 | 0.014785 | 0.031112 |
| RGS2            | 1q31.2   | 0.124637 | 0.014788 | 0.031116 |
| AMIGO1          | 1p13.3   | 0.124634 | 0.01479  | 0.031117 |
| ATP6V1G1        | 9q32     | -0.12463 | 0.014792 | 0.031117 |
| HSD11B1         | 1q32.2   | 0.124549 | 0.014859 | 0.031255 |
| TENT2           | 5q14.1   | 0.124529 | 0.014875 | 0.031283 |
| CPLX2           | 5q35.2   | -0.12453 | 0.014875 | 0.031283 |
| GIN53           | 16q21    | -0.12452 | 0.014879 | 0.031287 |
| AEN             | 15q26.1  | 0.12452  | 0.014882 | 0.031291 |
| APLNR           | 11q12.1  | 0.124507 | 0.014893 | 0.031308 |
| CD1D            | 1q23.1   | 0.124506 | 0.014893 | 0.031308 |
| MGAT1           | 5q35.3   | 0.124504 | 0.014895 | 0.031309 |
| SNAPC2          | 19p13.2  | -0.1245  | 0.014898 | 0.03131  |
| PYROXD2         | 10q24.2  | 0.124497 | 0.014901 | 0.031312 |
| UBOX5           | 20p13    | -0.1245  | 0.014902 | 0.031312 |
| GMIP            | 19p13.11 | 0.124494 | 0.014903 | 0.031312 |
| BRINP3          | 1q31.1   | 0.124462 | 0.014929 | 0.03136  |
| FCGR3B          | 1q23.3   | 0.124462 | 0.014929 | 0.03136  |
| TRABD           | 22q13.33 | -0.12445 | 0.014937 | 0.031374 |
| SAR1A           | 10q22.1  | 0.12444  | 0.014947 | 0.031392 |
| NXF3            | Xq22.1   | 0.124426 | 0.014958 | 0.031412 |
| GM2A            | 5q33.1   | 0.124416 | 0.014967 | 0.031426 |
| CHRN2           | 1q21.3   | 0.124385 | 0.014992 | 0.031476 |
| BICD2           | 9q22.31  | 0.124382 | 0.014994 | 0.031476 |
| HIGD1A          | 3p22.1   | 0.124381 | 0.014995 | 0.031476 |
| CATSPERG        | 19q13.2  | 0.124369 | 0.015005 | 0.031494 |
| ZBTB42          | 14q32.33 | 0.124363 | 0.01501  | 0.031498 |
| S1PR4           | 19p13.3  | 0.124362 | 0.015011 | 0.031498 |
| PPP3R1          | 2p14     | 0.124345 | 0.015025 | 0.031524 |
| BTBD19          | 1p34.1   | 0.124343 | 0.015026 | 0.031524 |
| SLC25A36        | 3q23     | -0.12432 | 0.015041 | 0.031552 |
| CHMP4A          | 14q12    | -0.12432 | 0.015043 | 0.031552 |
| TNFSF12-TNFSF13 | 17p13.1  | -0.12431 | 0.015055 | 0.031576 |
| ELOVL2          | 6p24.2   | 0.124301 | 0.015061 | 0.031584 |
| KLHL8           | 4q22.1   | 0.124281 | 0.015077 | 0.031612 |
| DHX30           | 3p21.31  | -0.12428 | 0.015078 | 0.031612 |
| COL4A5          | Xq22.3   | 0.124278 | 0.015079 | 0.031613 |
| SCRG1           | 4q34.1   | 0.124273 | 0.015084 | 0.031617 |
| C9ORF47         | 9q22.1   | 0.124272 | 0.015085 | 0.031617 |
| ZNF630          | Xp11.23  | -0.12427 | 0.015089 | 0.031622 |
| GREB1           | 2p25.1   | 0.124243 | 0.015109 | 0.03166  |
| MTMR6           | 13q12.13 | 0.124232 | 0.015118 | 0.031676 |
| MFSB8           | 4q28.2   | -0.1242  | 0.015141 | 0.031723 |
| DNMBP           | 10q24.2  | 0.124197 | 0.015146 | 0.03173  |
| VDAC2           | 10q22.2  | -0.12418 | 0.015161 | 0.031757 |
| PRR35           | 16p13.3  | -0.12417 | 0.015165 | 0.031763 |
| GPLD1           | 6p22.3   | 0.124171 | 0.015168 | 0.031764 |
| PLVAP           | 19p13.11 | 0.124161 | 0.015176 | 0.031778 |
| LOC100270746    | 6p22.2   | -0.12414 | 0.01519  | 0.031804 |
| TOE1            | 1p34.1   | -0.12411 | 0.015215 | 0.031854 |
| CFAP100         | 3q21.3   | -0.12411 | 0.015217 | 0.031855 |



|            |          |          |          |          |
|------------|----------|----------|----------|----------|
| NAV3       | 12q21.2  | 0.124087 | 0.015237 | 0.031892 |
| KLRB1      | 12p13.31 | 0.124074 | 0.015247 | 0.031911 |
| TMEM38B    | 9q31.2   | -0.12407 | 0.015255 | 0.031924 |
| FCF1       | 14q24.3  | 0.124035 | 0.01528  | 0.031973 |
| C1QTNF9    | 13q12.12 | 0.124033 | 0.015281 | 0.031973 |
| AUTS2      | 7q11.22  | 0.124011 | 0.0153   | 0.032009 |
| PAFAH2     | 1p36.11  | 0.123974 | 0.015331 | 0.03207  |
| IFT140     | 16p13.3  | 0.123939 | 0.01536  | 0.032125 |
| ZNF229     | 19q13.31 | 0.123938 | 0.015361 | 0.032125 |
| TAF7       | 5q31.3   | -0.12391 | 0.015381 | 0.032161 |
| NEDD4      | 15q21.3  | 0.123914 | 0.015381 | 0.032161 |
| MCHR1      | 22q13.2  | 0.123902 | 0.01539  | 0.032177 |
| SLC2A12    | 6q23.2   | -0.12387 | 0.015415 | 0.032225 |
| PPA1       | 10q22.1  | -0.12386 | 0.015427 | 0.032247 |
| RPA1       | 17p13.3  | 0.123804 | 0.015473 | 0.03234  |
| FRAS1      | 4q21.21  | 0.12379  | 0.015484 | 0.03236  |
| WIPI1      | 17q24.2  | 0.123779 | 0.015494 | 0.032376 |
| KRTAP10-6  | 21q22.3  | -0.12377 | 0.015502 | 0.03239  |
| CDC42BPG   | 11q13.1  | 0.123757 | 0.015512 | 0.032408 |
| STC1       | 8p21.2   | 0.123747 | 0.015521 | 0.032422 |
| KRTAP12-4  | 21q22.3  | -0.12374 | 0.015527 | 0.032432 |
| VSTM1      | 19q13.42 | 0.123718 | 0.015545 | 0.032466 |
| MPL        | 1p34.2   | 0.123707 | 0.015555 | 0.032482 |
| PITPNM2    | 12q24.31 | 0.123704 | 0.015557 | 0.032482 |
| TIE1       | 1p34.2   | 0.123702 | 0.015558 | 0.032482 |
| GDA        | 9q21.13  | 0.123701 | 0.015559 | 0.032482 |
| GPS2       | 17p13.1  | -0.1237  | 0.015564 | 0.032488 |
| SULT1A3    | 16p11.2  | -0.12369 | 0.015567 | 0.032493 |
| FOXD1      | 5q13.2   | 0.123687 | 0.015571 | 0.032497 |
| ANKRD6     | 6q15     | 0.123665 | 0.01559  | 0.032533 |
| INTS5      | 11q12.3  | -0.12366 | 0.015593 | 0.032537 |
| KRT24      | 17q21.2  | 0.123655 | 0.015598 | 0.032544 |
| LHX4       | 1q25.2   | 0.123646 | 0.015605 | 0.032555 |
| ZNF777     | 7q36.1   | -0.12364 | 0.015612 | 0.032563 |
| WDR17      | 4q34.2   | 0.123639 | 0.015612 | 0.032563 |
| HCCS       | Xp22.2   | -0.12359 | 0.01565  | 0.032639 |
| IL1RAPL2   | Xq22.3   | 0.123586 | 0.015656 | 0.032648 |
| ZBTB10     | 8q21.13  | 0.123572 | 0.015668 | 0.032669 |
| ECPAS      | 9q31.3   | 0.123568 | 0.015672 | 0.032674 |
| SLC13A1    | 7q31.32  | 0.123503 | 0.015727 | 0.032785 |
| ANKRD36BP2 | 2p11.2   | 0.123481 | 0.015746 | 0.03282  |
| PCDHB16    | 5q31.3   | 0.123478 | 0.015749 | 0.032823 |
| PIP5K1C    | 19p13.3  | 0.123465 | 0.01576  | 0.032843 |
| RBBP4      | 1p35.1   | -0.12346 | 0.015762 | 0.032845 |
| DARS2      | 1q25.1   | 0.123421 | 0.015797 | 0.032913 |
| REXO1      | 19p13.3  | -0.12342 | 0.015798 | 0.032913 |
| SAA1       | 11p15.1  | -0.12341 | 0.01581  | 0.032933 |
| PLP2       | Xp11.23  | -0.1234  | 0.015815 | 0.032941 |
| GCA        | 2q24.2   | -0.12336 | 0.015853 | 0.033017 |
| CWC25      | 17q12    | -0.12335 | 0.01586  | 0.033029 |
| SLC27A3    | 1q21.3   | 0.123335 | 0.015871 | 0.033047 |
| ANKS1A     | 6p21.31  | 0.123254 | 0.01594  | 0.033188 |
| SLC4A9     | 5q31.3   | -0.12325 | 0.015943 | 0.033191 |
| C2ORF81    | 2p13.1   | -0.12318 | 0.016007 | 0.03332  |
| MESP1      | 15q26.1  | -0.12317 | 0.01601  | 0.033323 |
| PIMREG     | 17p13.2  | -0.12316 | 0.016021 | 0.033342 |
| LOC220729  | 3q29     | -0.12315 | 0.016033 | 0.033363 |
| COG8       | 16q22.1  | 0.123144 | 0.016035 | 0.033365 |

|           |                    |          |          |          |
|-----------|--------------------|----------|----------|----------|
| CFAP206   | 6q15               | 0.12314  | 0.016039 | 0.033368 |
| PTPN23    | 3p21.31            | 0.12313  | 0.016048 | 0.033384 |
| GIPC3     | 19p13.3            | 0.123127 | 0.01605  | 0.033386 |
| CKM       | 19q13.32           | -0.12312 | 0.016055 | 0.033391 |
| ZBED8     | 5q33.3             | -0.12311 | 0.016064 | 0.033408 |
| TDRD3     | 13q21.2            | -0.12309 | 0.016085 | 0.033448 |
| ITPR3     | 6p21.31            | 0.123067 | 0.016102 | 0.03348  |
| MKI67     | 10q26.2            | 0.123039 | 0.016127 | 0.033528 |
| GTPBP4    | 10p15.3            | -0.12302 | 0.016145 | 0.033562 |
| ZNF671    | 19q13.43           | 0.123    | 0.016161 | 0.033591 |
| LSG1      | 3q29               | -0.123   | 0.016164 | 0.033594 |
| HSF5      | 17q22              | 0.122993 | 0.016167 | 0.033597 |
| SLC23A1   | 5q31.2             | -0.12297 | 0.01619  | 0.033642 |
| PEX19     | 1q23.2             | 0.122962 | 0.016193 | 0.033645 |
| CAPS      | 19p13.3            | -0.12295 | 0.016202 | 0.033659 |
| EIF1AX    | Xp22.12            | -0.12295 | 0.016207 | 0.033666 |
| APLF      | 2p13.3             | -0.12294 | 0.016213 | 0.033673 |
| FMO3      | 1q24.3             | 0.122939 | 0.016214 | 0.033673 |
| DHRX      | Xp22.33 and Yp11.2 | -0.12291 | 0.016238 | 0.033719 |
| VSTM2B    | 19q12              | -0.12289 | 0.016257 | 0.033756 |
| ACTR10    | 14q23.1            | 0.122878 | 0.016267 | 0.033774 |
| VDAC3     | 8p11.21            | -0.12286 | 0.016284 | 0.033805 |
| SGIP1     | 1p31.3             | 0.122853 | 0.016289 | 0.033813 |
| AK5       | 1p31.1             | 0.12284  | 0.0163   | 0.033832 |
| MPZ       | 1q23.3             | -0.12284 | 0.016302 | 0.033832 |
| GAS1      | 9q21.33            | 0.122758 | 0.016373 | 0.033975 |
| ZNF544    | 19q13.43           | -0.12274 | 0.016391 | 0.034009 |
| KANSL1L   | 2q34               | 0.122714 | 0.016411 | 0.034048 |
| CAB39L    | 13q14.2            | -0.12268 | 0.016443 | 0.03411  |
| LINC00520 | 14q22.3            | 0.122663 | 0.016457 | 0.034135 |
| SPATA48   | 7p12.2             | 0.122636 | 0.016481 | 0.034181 |
| H2AFB1    | Xq28               | -0.1226  | 0.016509 | 0.034237 |
| RSRC1     | 3q25.32            | 0.122601 | 0.016511 | 0.034238 |
| GFAP      | 17q21.31           | 0.122594 | 0.016518 | 0.034248 |
| CDK15     | 2q33.1             | 0.122579 | 0.016531 | 0.034271 |
| TM9SF1    | 14q12              | 0.122573 | 0.016536 | 0.034279 |
| BLNK      | 10q24.1            | 0.122559 | 0.016549 | 0.034302 |
| C1QTNF6   | 22q12.3            | 0.122549 | 0.016557 | 0.034316 |
| TMEM81    | 1q32.1             | -0.12254 | 0.016563 | 0.034323 |
| TWF2      | 3p21.2             | -0.12254 | 0.016567 | 0.034329 |
| FGF14     | 13q33.1            | 0.122525 | 0.016579 | 0.03435  |
| CPA4      | 7q32.2             | -0.12251 | 0.016589 | 0.034368 |
| EIF4B     | 12q13.13           | 0.122508 | 0.016594 | 0.034374 |
| ENTHD1    | 22q13.1            | 0.122496 | 0.016605 | 0.034393 |
| TRPA1     | 8q21.11            | 0.122493 | 0.016607 | 0.034395 |
| SLITRK3   | 3q26.1             | 0.122473 | 0.016626 | 0.034429 |
| HIST1H2AJ | 6p22.1             | -0.12246 | 0.016637 | 0.034449 |
| AKIRIN1   | 1p34.3             | 0.122374 | 0.016714 | 0.034604 |
| TACR2     | 10q22.1            | 0.122371 | 0.016717 | 0.034607 |
| HIST1H2BG | 6p22.2             | -0.12235 | 0.016734 | 0.03464  |
| EPHX1     | 1q42.12            | -0.12235 | 0.016737 | 0.034642 |
| CIB3      | 19p13.11           | 0.122337 | 0.016747 | 0.034659 |
| ZNF423    | 16q12.1            | 0.12231  | 0.016771 | 0.034705 |
| ACY1      | 3p21.2             | -0.1223  | 0.016783 | 0.034722 |
| BRAP      | 12q24.12           | 0.122298 | 0.016783 | 0.034722 |
| UBAP1L    | 15q22.31           | -0.12229 | 0.016788 | 0.03473  |
| S100A7    | 1q21.3             | -0.12229 | 0.016793 | 0.034736 |
| UTS2B     | 3q28               | 0.122284 | 0.016795 | 0.034736 |

|             |                |          |          |          |
|-------------|----------------|----------|----------|----------|
| ACADSB      | 10q26.13       | 0.122278 | 0.0168   | 0.034744 |
| KLHL41      | 2q31.1         | -0.12225 | 0.01683  | 0.034799 |
| SH3YL1      | 2p25.3         | -0.12224 | 0.01683  | 0.034799 |
| DKK2        | 4q25           | 0.122236 | 0.016838 | 0.034812 |
| GABPB1      | 15q21.2        | 0.12223  | 0.016844 | 0.034819 |
| PAPOLB      | 7p22.1         | 0.122224 | 0.016849 | 0.034827 |
| RABAC1      | 19q13.2        | -0.12222 | 0.016852 | 0.03483  |
| HSPA1L      | 6p21.33        | 0.122197 | 0.016874 | 0.034871 |
| HOXA4       | 7p15.2         | -0.12219 | 0.016883 | 0.034887 |
| NPR1        | 1q21.3         | 0.122159 | 0.016908 | 0.034934 |
| HNRNPR      | 1p36.12        | 0.122135 | 0.016929 | 0.034975 |
| TMEM254-AS1 | 10q22.3        | -0.12212 | 0.01694  | 0.034994 |
| AIFM2       | 10q22.1        | -0.1221  | 0.016962 | 0.035034 |
| SLC7A11     | 4q28.3         | 0.122098 | 0.016963 | 0.035034 |
| RIMS3       | 1p34.2         | 0.122093 | 0.016968 | 0.035039 |
| ARSE        | Xp22.33        | -0.12209 | 0.016973 | 0.035048 |
| CPQ         | 8q22.1         | 0.122079 | 0.016981 | 0.035056 |
| LOC154761   | 7q35           | 0.122078 | 0.016981 | 0.035056 |
| XXYL1       | 3q29           | -0.12205 | 0.017011 | 0.035114 |
| WEE1        | 11p15.4        | 0.122041 | 0.017015 | 0.035119 |
| DDA1        | 19p13.11       | -0.12203 | 0.017027 | 0.035141 |
| TRAF3       | 14q32.32       | 0.122017 | 0.017037 | 0.035158 |
| UNC5CL      | 6p21.1         | -0.122   | 0.017053 | 0.035186 |
| ESCO2       | 8p21.1         | 0.121995 | 0.017057 | 0.035192 |
| HDX         | Xq21.1         | 0.12199  | 0.017061 | 0.035197 |
| KISS1       | 1q32.1         | -0.12196 | 0.01709  | 0.035251 |
| ACTL8       | 1p36.13        | -0.12194 | 0.017108 | 0.035285 |
| SERPINA10   | 14q32.13       | -0.1219  | 0.017147 | 0.035363 |
| CD82        | 11p11.2        | 0.121858 | 0.017183 | 0.035433 |
| PIBF1       | 13q21.33-q22.1 | -0.12183 | 0.017212 | 0.035489 |
| CHAT        | 10q11.23       | 0.121825 | 0.017214 | 0.035489 |
| CR2         | 1q32.2         | 0.121818 | 0.01722  | 0.035497 |
| ECE1        | 1p36.12        | 0.121816 | 0.017221 | 0.035497 |
| ATOH8       | 2p11.2         | 0.121813 | 0.017224 | 0.0355   |
| IPO11       | 5q12.1         | 0.12181  | 0.017227 | 0.035501 |
| HPCAL1      | 2p25.1         | -0.12178 | 0.017259 | 0.035563 |
| B4GALT6     | 18q12.1        | 0.121768 | 0.017266 | 0.035575 |
| PLOD2       | 3q24           | 0.121711 | 0.017318 | 0.035678 |
| TEX261      | 2p13.3         | -0.12165 | 0.017373 | 0.035787 |
| TMEM131L    | 4q31.3         | 0.121641 | 0.017384 | 0.035802 |
| ABCB4       | 7q21.12        | 0.121641 | 0.017384 | 0.035802 |
| ZNF664      | 12q24.31       | 0.121632 | 0.017392 | 0.035815 |
| PKIB        | 6q22.31        | 0.121626 | 0.017398 | 0.035821 |
| PPT1        | 1p34.2         | -0.12163 | 0.017398 | 0.035821 |
| ZNF585B     | 19q13.12       | 0.121621 | 0.017402 | 0.035826 |
| SEMA6D      | 15q21.1        | 0.121604 | 0.017418 | 0.035854 |
| CPS1        | 2q34           | 0.121599 | 0.017423 | 0.03586  |
| POM121L4P   | 22q11.21       | 0.121595 | 0.017426 | 0.035861 |
| ZNF239      | 10q11.21       | -0.12159 | 0.017427 | 0.035861 |
| LRRC66      | 4q12           | 0.121564 | 0.017455 | 0.035916 |
| PANX1       | 11q21          | 0.12155  | 0.017468 | 0.035939 |
| FANCM       | 14q21.2        | 0.121545 | 0.017473 | 0.035945 |
| TSSK1B      | 5q22.2         | 0.12154  | 0.017477 | 0.03595  |
| ARHGAP33    | 19q13.12       | -0.12154 | 0.017479 | 0.03595  |
| POTEC       | 18p11.21       | 0.121535 | 0.017482 | 0.035953 |
| WARS        | 14q32.2        | 0.121528 | 0.017489 | 0.035964 |
| SLC7A10     | 19q13.11       | -0.12152 | 0.017493 | 0.035969 |
| C16ORF89    | 16p13.3        | 0.121518 | 0.017498 | 0.035975 |

|          |              |          |          |          |
|----------|--------------|----------|----------|----------|
| LNP1     | 3q12.2       | 0.121464 | 0.017549 | 0.036075 |
| NEURL1   | 10q24.33     | 0.121446 | 0.017565 | 0.036106 |
| KCNJ2    | 17q24.3      | 0.121423 | 0.017587 | 0.036146 |
| EPS8L2   | 11p15.5      | -0.12142 | 0.017589 | 0.036146 |
| NAGLU    | 17q21.2      | -0.12142 | 0.017594 | 0.036153 |
| STAT4    | 2q32.2-q32.3 | 0.121394 | 0.017614 | 0.036191 |
| CYP2C18  | 10q23.33     | 0.121375 | 0.017632 | 0.036221 |
| EMB      | 5q11.1       | 0.121374 | 0.017633 | 0.036221 |
| C12ORF77 | 12p12.1      | 0.121373 | 0.017634 | 0.036221 |
| CHPT1    | 12q23.2      | -0.12137 | 0.017639 | 0.036227 |
| PCDHB11  | 5q31.3       | 0.121351 | 0.017655 | 0.036256 |
| ZNF646   | 16p11.2      | 0.121315 | 0.017688 | 0.036321 |
| HLA-DRA  | 6p21.32      | 0.12129  | 0.017712 | 0.036367 |
| TDRD1    | 10q25.3      | 0.121287 | 0.017715 | 0.036368 |
| TMEM272  | 13q14.3      | -0.12126 | 0.017742 | 0.03642  |
| EFS      | 14q11.2      | 0.121245 | 0.017755 | 0.036443 |
| STK4     | 20q13.12     | -0.12121 | 0.017786 | 0.036504 |
| SLC9A6   | Xq26.3       | 0.121193 | 0.017804 | 0.036537 |
| ZNF28    | 19q13.41     | 0.121169 | 0.017827 | 0.036579 |
| OSBPL1A  | 18q11.2      | 0.121156 | 0.017839 | 0.036601 |
| DUSP1    | 5q35.1       | 0.121139 | 0.017855 | 0.03663  |
| HNRNPAB  | 5q35.3       | -0.12114 | 0.017859 | 0.036634 |
| MIR99AHG | 21q21.1      | 0.121129 | 0.017865 | 0.036643 |
| KLK5     | 19q13.41     | -0.12111 | 0.01788  | 0.03667  |
| HHIPL1   | 14q32.2      | 0.121109 | 0.017884 | 0.036674 |
| PPP1R36  | 14q23.3      | 0.121105 | 0.017887 | 0.036677 |
| SMC1A    | Xp11.22      | 0.121089 | 0.017902 | 0.036704 |
| SLC25A11 | 17p13.2      | -0.12109 | 0.017904 | 0.036704 |
| TEX9     | 15q21.3      | 0.121055 | 0.017935 | 0.036764 |
| TMEM121B | 22q11.1      | 0.121052 | 0.017938 | 0.036767 |
| ADRA1A   | 8p21.2       | 0.121038 | 0.017951 | 0.03679  |
| FEZ1     | 11q24.2      | 0.120991 | 0.017996 | 0.036877 |
| ACAA1    | 3p22.2       | -0.12099 | 0.018001 | 0.036885 |
| BTC      | 4q13.3       | 0.120977 | 0.01801  | 0.036899 |
| FCER2    | 19p13.2      | 0.120974 | 0.018013 | 0.036901 |
| EML2     | 19q13.32     | 0.120971 | 0.018015 | 0.036902 |
| NOX3     | 6q25.3       | -0.12094 | 0.018049 | 0.036967 |
| ITGA10   | 1q21.1       | 0.12092  | 0.018065 | 0.036996 |
| PHLDA2   | 11p15.4      | -0.12092 | 0.018067 | 0.036996 |
| LASP1    | 17q12        | 0.120828 | 0.018153 | 0.037169 |
| XG       | Xp22.33      | -0.12082 | 0.018157 | 0.037174 |
| PPIEL    | 1p34.3       | -0.12079 | 0.018186 | 0.037228 |
| OGN      | 9q22.31      | 0.120787 | 0.018193 | 0.037239 |
| NPLOC4   | 17q25.3      | -0.12078 | 0.018197 | 0.037245 |
| CSPP1    | 8q13.1-q13.2 | -0.12077 | 0.018205 | 0.037257 |
| SLC2A3   | 12p13.31     | 0.120772 | 0.018207 | 0.037257 |
| EXTL2    | 1p21.2       | 0.120746 | 0.018232 | 0.037305 |
| SLC10A2  | 13q33.1      | 0.12074  | 0.018238 | 0.037313 |
| CCM2L    | 20q11.21     | 0.120732 | 0.018246 | 0.037324 |
| HSPA12B  | 20p13        | 0.120704 | 0.018273 | 0.037377 |
| COL6A2   | 21q22.3      | 0.120701 | 0.018276 | 0.037378 |
| HSPB7    | 1p36.13      | 0.120699 | 0.018278 | 0.037379 |
| CYB5A    | 18q22.3      | -0.12069 | 0.018285 | 0.037385 |
| ACTL6A   | 3q26.33      | -0.12069 | 0.018285 | 0.037385 |
| LGALS7B  | 19q13.2      | -0.12069 | 0.018286 | 0.037385 |
| HOXA2    | 7p15.2       | -0.12067 | 0.018303 | 0.037415 |
| NMNAT2   | 1q25.3       | 0.120665 | 0.01831  | 0.037426 |
| MRPS36   | 5q13.2       | -0.12066 | 0.018313 | 0.037427 |

|           |          |          |          |          |
|-----------|----------|----------|----------|----------|
| GNAT1     | 3p21.31  | -0.12066 | 0.018316 | 0.037431 |
| BMS1P1    | 10q11.22 | 0.120638 | 0.018337 | 0.037468 |
| DBH       | 9q34.2   | 0.120637 | 0.018338 | 0.037468 |
| RWDD3     | 1p21.3   | -0.12062 | 0.018357 | 0.037502 |
| ANXA5     | 4q27     | 0.120613 | 0.018361 | 0.037507 |
| RBM20     | 10q25.2  | 0.1206   | 0.018374 | 0.037529 |
| LY75      | 2q24.2   | 0.120595 | 0.018379 | 0.037534 |
| NEMP2     | 2q32.2   | 0.120594 | 0.01838  | 0.037534 |
| DES       | 2q35     | 0.120554 | 0.018419 | 0.03761  |
| TNFRSF10D | 8p21.3   | 0.12055  | 0.018423 | 0.037613 |
| THPO      | 3q27.1   | 0.120529 | 0.018444 | 0.037652 |
| LRRC56    | 11p15.5  | -0.12049 | 0.018478 | 0.037719 |
| ZNF658    | 9q21.11  | 0.120483 | 0.018488 | 0.037736 |
| RNF14     | 5q31.3   | 0.120476 | 0.018495 | 0.037746 |
| EVL       | 14q32.2  | 0.120472 | 0.0185   | 0.037751 |
| UCA1      | 19p13.12 | -0.12045 | 0.018521 | 0.037791 |
| RTKN2     | 10q21.2  | 0.120445 | 0.018526 | 0.037797 |
| SMOC1     | 14q24.2  | -0.12039 | 0.018582 | 0.037906 |
| KRT73     | 12q13.13 | 0.120387 | 0.018583 | 0.037906 |
| TAS2R38   | 7q34     | 0.120379 | 0.018591 | 0.037918 |
| STKLD1    | 9q34.2   | -0.12037 | 0.018597 | 0.037926 |
| CSNK1A1L  | 13q13.3  | 0.120366 | 0.018604 | 0.037937 |
| DCHS1     | 11p15.4  | 0.12036  | 0.018609 | 0.037944 |
| RNU4ATAC  | 2q14.2   | -0.12035 | 0.018618 | 0.037958 |
| BRPF1     | 3p25.3   | 0.120331 | 0.018638 | 0.037994 |
| DCUN1D4   | 4q12     | -0.12031 | 0.01866  | 0.038034 |
| TUBA1B    | 12q13.12 | -0.12031 | 0.018661 | 0.038034 |
| CALHM4    | 6q22.1   | 0.120288 | 0.01868  | 0.03807  |
| HLA-DMB   | 6p21.32  | 0.120278 | 0.01869  | 0.038086 |
| SNORA6    | 3p22.1   | -0.12024 | 0.018726 | 0.038155 |
| PLEKHA8   | 7p14.3   | -0.12023 | 0.018735 | 0.038168 |
| SERPINB1  | 6p25.2   | 0.120232 | 0.018736 | 0.038168 |
| NRK       | Xq22.3   | 0.120207 | 0.018761 | 0.038214 |
| DUSP21    | Xp11.3   | 0.120188 | 0.01878  | 0.038249 |
| LINC00205 | 21q22.3  | 0.120157 | 0.018811 | 0.038306 |
| OMD       | 9q22.31  | 0.120154 | 0.018813 | 0.038306 |
| RARB      | 3p24.2   | 0.120154 | 0.018813 | 0.038306 |
| DHRS1     | 14q12    | -0.12014 | 0.018827 | 0.03833  |
| CFAP46    | 10q26.3  | 0.120113 | 0.018854 | 0.038381 |
| TMEM47    | Xp21.1   | 0.120078 | 0.018889 | 0.038449 |
| SUPV3L1   | 10q22.1  | -0.12007 | 0.018899 | 0.038464 |
| CELF4     | 18q12.2  | 0.120064 | 0.018903 | 0.038468 |
| PPHLN1    | 12q12    | -0.12005 | 0.018918 | 0.038496 |
| TXNRD3NB  | 3q21.3   | -0.12004 | 0.018925 | 0.038505 |
| TRMT12    | 8q24.13  | -0.12003 | 0.018939 | 0.038531 |
| LRRC49    | 15q23    | 0.120016 | 0.018951 | 0.038551 |
| CALR      | 19p13.13 | -0.12001 | 0.018953 | 0.038551 |
| CYP1A1    | 15q24.1  | 0.120003 | 0.018964 | 0.038569 |
| UTP14C    | 13q14.3  | 0.119995 | 0.018972 | 0.038582 |
| CHI3L2    | 1p13.2   | 0.119967 | 0.019    | 0.038635 |
| CD2       | 1p13.1   | 0.11995  | 0.019018 | 0.038664 |
| NUP155    | 5p13.2   | 0.119949 | 0.019018 | 0.038664 |
| CLN8      | 8p23.3   | 0.119914 | 0.019053 | 0.038732 |
| UBE2W     | 8q21.11  | 0.1199   | 0.019067 | 0.038755 |
| SYTL3     | 6q25.3   | 0.119893 | 0.019075 | 0.038767 |
| ZNF711    | Xq21.1   | -0.11987 | 0.019099 | 0.038812 |
| MS4A12    | 11q12.2  | 0.119867 | 0.019101 | 0.038812 |
| TPH1      | 11p15.1  | 0.119842 | 0.019126 | 0.03886  |

|           |          |          |          |          |
|-----------|----------|----------|----------|----------|
| GPN3      | 12q24.11 | -0.11981 | 0.01916  | 0.038925 |
| SH2D4B    | 10q23.1  | 0.1198   | 0.019168 | 0.038938 |
| CFAP74    | 1p36.33  | -0.11977 | 0.0192   | 0.038998 |
| GNG7      | 19p13.3  | 0.119745 | 0.019224 | 0.039042 |
| SAG       | 2q37.1   | -0.11974 | 0.019229 | 0.039049 |
| FBXO39    | 17p13.1  | 0.119697 | 0.019273 | 0.039131 |
| NPTX2     | 7q22.1   | -0.1197  | 0.019275 | 0.039131 |
| LAYN      | 11q23.1  | 0.119695 | 0.019275 | 0.039131 |
| GOLGA6L1  | 15q11.2  | -0.11969 | 0.019283 | 0.039143 |
| AK8       | 9q34.13  | -0.11965 | 0.019325 | 0.039225 |
| ANXA7     | 10q22.2  | 0.119619 | 0.019352 | 0.039275 |
| RGS5      | 1q23.3   | 0.119602 | 0.01937  | 0.039307 |
| HES4      | 1p36.33  | -0.11959 | 0.019379 | 0.039322 |
| B4GALT4   | 3q13.32  | 0.119583 | 0.019389 | 0.039337 |
| ZNF540    | 19q13.12 | 0.119567 | 0.019405 | 0.039367 |
| SLC49A3   | 4p16.3   | 0.119561 | 0.019411 | 0.039375 |
| LAMP3     | 3q27.1   | 0.119559 | 0.019414 | 0.039377 |
| COX16     | 14q24.2  | -0.11956 | 0.019416 | 0.039377 |
| ROGDI     | 16p13.3  | -0.11955 | 0.019427 | 0.039395 |
| MPPED2    | 11p14.1  | 0.119534 | 0.019439 | 0.039416 |
| SELENON   | 1p36.11  | 0.119524 | 0.019449 | 0.03943  |
| CPAMD8    | 19p13.11 | 0.119523 | 0.01945  | 0.03943  |
| CCL26     | 7q11.23  | 0.119516 | 0.019458 | 0.039442 |
| SYNCRIP   | 6q14.3   | 0.119507 | 0.019467 | 0.039457 |
| ECI2      | 6p25.2   | 0.119492 | 0.019482 | 0.039483 |
| ZDHHC9    | Xq26.1   | -0.11949 | 0.019486 | 0.039486 |
| MAPK8IP2  | 22q13.33 | -0.11946 | 0.019516 | 0.039542 |
| CD47      | 3q13.12  | -0.11946 | 0.019517 | 0.039542 |
| KANK1     | 9p24.3   | 0.119443 | 0.019533 | 0.039566 |
| WASHC2C   | 10q11.22 | 0.119443 | 0.019533 | 0.039566 |
| CCDC74A   | 2q21.1   | -0.11944 | 0.019537 | 0.03957  |
| RBBP6     | 16p12.1  | 0.119427 | 0.019549 | 0.03959  |
| ZFAT      | 8q24.22  | 0.119421 | 0.019555 | 0.039598 |
| LINC00654 | 20p12.3  | 0.119381 | 0.019596 | 0.039677 |
| ACTL9     | 19p13.2  | -0.11938 | 0.019599 | 0.039679 |
| GPR83     | 11q21    | -0.11937 | 0.019606 | 0.039689 |
| IL12B     | 5q33.3   | 0.119361 | 0.019617 | 0.039709 |
| OTX2      | 14q22.3  | 0.119308 | 0.019672 | 0.039814 |
| STAU1     | 20q13.13 | -0.1193  | 0.019678 | 0.039824 |
| MKNK2     | 19p13.3  | 0.119294 | 0.019686 | 0.039835 |
| CXORF49B  | Xq13.1   | -0.11918 | 0.019809 | 0.04008  |
| IGSF5     | 21q22.2  | 0.119165 | 0.01982  | 0.040098 |
| MAP3K15   | Xp22.12  | 0.119127 | 0.01986  | 0.040172 |
| OPTC      | 1q32.1   | -0.11913 | 0.019861 | 0.040172 |
| FSD2      | 15q25.2  | 0.119095 | 0.019893 | 0.040234 |
| CLC       | 19q13.2  | 0.119091 | 0.019897 | 0.040239 |
| ADRB1     | 10q25.3  | 0.119068 | 0.019921 | 0.040283 |
| FNDC11    | 20q13.33 | -0.11905 | 0.019935 | 0.040307 |
| SCARNA5   | 2q37.1   | -0.11905 | 0.01994  | 0.040312 |
| KIF5A     | 12q13.3  | 0.119024 | 0.019968 | 0.040365 |
| TDP2      | 6p22.3   | 0.119003 | 0.019989 | 0.040404 |
| ZNF595    | 4p16.3   | -0.119   | 0.019996 | 0.040415 |
| CDH2      | 18q12.1  | 0.118956 | 0.020039 | 0.040497 |
| PCDHGA6   | 5q31.3   | 0.118948 | 0.020048 | 0.04051  |
| PHOSPHO2  | 2q31.1   | -0.11894 | 0.02006  | 0.040531 |
| VIP       | 6q25.2   | 0.118926 | 0.02007  | 0.040547 |
| SPSB4     | 3q23     | 0.11889  | 0.020108 | 0.04062  |
| TOR4A     | 9q34.3   | 0.11888  | 0.020119 | 0.040637 |

|           |              |          |          |          |
|-----------|--------------|----------|----------|----------|
| RCC2      | 1p36.13      | -0.11888 | 0.020121 | 0.040637 |
| BAIAP2L1  | 7q21.3-q22.1 | 0.118865 | 0.020135 | 0.040662 |
| ZNF491    | 19p13.2      | 0.118842 | 0.020159 | 0.040706 |
| ZNF648    | 1q25.3       | 0.118795 | 0.020209 | 0.040802 |
| ZRSR2     | Xp22.2       | -0.11878 | 0.020223 | 0.040827 |
| KCNA2     | 1p13.3       | 0.118776 | 0.020229 | 0.040835 |
| KCNK2     | 1q41         | 0.118772 | 0.020233 | 0.04084  |
| ADORA2B   | 17p12        | 0.118733 | 0.020275 | 0.040919 |
| YARS2     | 12p11.21     | -0.11871 | 0.020297 | 0.04096  |
| BEND3     | 6q21         | 0.118695 | 0.020315 | 0.040992 |
| SHISA6    | 17p12        | 0.118688 | 0.020322 | 0.041002 |
| LGALS9    | 17q11.2      | 0.118665 | 0.020346 | 0.041048 |
| TACC3     | 4p16.3       | -0.11864 | 0.020372 | 0.041095 |
| KLK6      | 19q13.41     | -0.11862 | 0.020394 | 0.041135 |
| ADIRF     | 10q23.2      | -0.1186  | 0.020414 | 0.041172 |
| FAP       | 2q24.2       | 0.118574 | 0.020444 | 0.041223 |
| C6ORF62   | 6p22.3       | -0.11857 | 0.020444 | 0.041223 |
| IL7       | 8q21.13      | 0.118558 | 0.020461 | 0.041254 |
| WNT1      | 12q13.12     | 0.11855  | 0.020469 | 0.041266 |
| ZNF814    | 19q13.43     | -0.11855 | 0.020471 | 0.041266 |
| LOC145474 | 14q24.2      | -0.11854 | 0.020478 | 0.041273 |
| CALM2     | 2p21         | 0.118541 | 0.020479 | 0.041273 |
| ANO5      | 11p14.3      | 0.118539 | 0.020481 | 0.041273 |
| TMEM151A  | 11q13.2      | -0.11853 | 0.020493 | 0.041292 |
| PCDHGA5   | 5q31.3       | 0.118523 | 0.020498 | 0.0413   |
| DNAH6     | 2p11.2       | -0.11851 | 0.020509 | 0.041318 |
| PTRHD1    | 2p23.3       | -0.11851 | 0.020514 | 0.041323 |
| C1QTNF9B  | 13q12.12     | -0.1185  | 0.020521 | 0.041332 |
| ALS2CL    | 3p21.31      | -0.1185  | 0.020527 | 0.04134  |
| ZNF761    | 19q13.42     | -0.11848 | 0.020546 | 0.041369 |
| CRIPAK    | 4p16.3       | -0.11848 | 0.020548 | 0.041369 |
| ZNF497    | 19q13.43     | -0.11848 | 0.020549 | 0.041369 |
| ME2       | 18q21.2      | 0.118476 | 0.020549 | 0.041369 |
| TMEM72    | 10q11.21     | 0.118473 | 0.020553 | 0.041372 |
| OR10Q1    | 11q12.1      | -0.11846 | 0.020563 | 0.041388 |
| KATNAL1   | 13q12.3      | 0.118453 | 0.020574 | 0.041407 |
| ZNF443    | 19p13.2      | -0.11842 | 0.020605 | 0.041464 |
| KLRC2     | 12p13.2      | -0.1184  | 0.020627 | 0.0415   |
| TANGO2    | 22q11.21     | -0.1184  | 0.020629 | 0.0415   |
| RDH11     | 14q24.1      | 0.118402 | 0.020629 | 0.0415   |
| TMPRSS6   | 22q12.3      | -0.11839 | 0.020646 | 0.041531 |
| METTL11B  | 1q24.2       | 0.118381 | 0.020652 | 0.041538 |
| AP1B1     | 22q12.2      | 0.118369 | 0.020664 | 0.041558 |
| TSPO2     | 6p21.1       | -0.11832 | 0.020713 | 0.041652 |
| WHAMMP3   | 15q11.2      | 0.118315 | 0.020722 | 0.041662 |
| PEX7      | 6q23.3       | -0.11831 | 0.020723 | 0.041662 |
| NSFL1C    | 20p13        | -0.11831 | 0.020724 | 0.041662 |
| RPL26     | 17p13.1      | -0.11831 | 0.020726 | 0.041663 |
| NUDT17    | 1q21.1       | 0.118303 | 0.020735 | 0.041677 |
| ANKRD40   | 17q21.33     | 0.118258 | 0.020785 | 0.041772 |
| M1AP      | 2p13.1       | 0.118199 | 0.020848 | 0.041896 |
| DPF1      | 19q13.2      | -0.1182  | 0.020852 | 0.041899 |
| RHOQ      | 2p21         | -0.11819 | 0.020855 | 0.041901 |
| BDH2      | 4q24         | -0.11816 | 0.020891 | 0.041966 |
| RBPJL     | 20q13.12     | -0.11816 | 0.020892 | 0.041966 |
| SACS      | 13q12.12     | 0.11815  | 0.020902 | 0.041981 |
| TNPO3     | 7q32.1       | 0.118133 | 0.02092  | 0.042015 |
| ECHDC3    | 10p14        | -0.11813 | 0.020926 | 0.042021 |

|              |          |          |          |          |
|--------------|----------|----------|----------|----------|
| CST8         | 20p11.21 | 0.118109 | 0.020947 | 0.04206  |
| ADGRF4       | 6p12.3   | -0.11809 | 0.020967 | 0.042095 |
| C10ORF91     | 10q26.3  | -0.11808 | 0.020975 | 0.042108 |
| RPL17        | 18q21.1  | -0.11807 | 0.020984 | 0.042122 |
| ZNF354A      | 5q35.3   | -0.11807 | 0.020986 | 0.042122 |
| RPL32P3      | 3q21.3   | -0.11807 | 0.020991 | 0.042128 |
| DENND3       | 8q24.3   | 0.118028 | 0.021035 | 0.042212 |
| TP73         | 1p36.32  | -0.118   | 0.021064 | 0.042264 |
| GSTM5        | 1p13.3   | 0.117999 | 0.021067 | 0.042266 |
| EXTL3        | 8p21.1   | 0.117998 | 0.021069 | 0.042266 |
| PNISR        | 6q16.2   | -0.11797 | 0.021099 | 0.042322 |
| MYF5         | 12q21.31 | 0.117968 | 0.021102 | 0.042324 |
| CMAHP        | 6p22.3   | 0.117889 | 0.021189 | 0.042494 |
| ANKRD30B     | 18p11.21 | 0.117847 | 0.021235 | 0.042582 |
| SLC22A18     | 11p15.4  | -0.11781 | 0.02127  | 0.042649 |
| CCDC157      | 22q12.2  | -0.1178  | 0.021281 | 0.042667 |
| LGALS14      | 19q13.2  | -0.1178  | 0.021285 | 0.042671 |
| NTNG1        | 1p13.3   | 0.117763 | 0.021327 | 0.042751 |
| AGO3         | 1p34.3   | 0.117756 | 0.021336 | 0.042764 |
| CSTL1        | 20p11.21 | -0.11773 | 0.021366 | 0.042821 |
| RRH          | 4q25     | -0.11765 | 0.021453 | 0.042989 |
| SESN1        | 6q21     | -0.11764 | 0.021461 | 0.043001 |
| LTA          | 6p21.33  | 0.117633 | 0.021473 | 0.043021 |
| G3BP1        | 5q33.1   | 0.117611 | 0.021497 | 0.043065 |
| HACL1        | 3p25.1   | -0.1176  | 0.021507 | 0.043079 |
| LRIF1        | 1p13.3   | -0.1176  | 0.021509 | 0.043079 |
| ISCA2        | 14q24.3  | -0.11759 | 0.021523 | 0.043103 |
| EFCAB5       | 17q11.2  | 0.117578 | 0.021534 | 0.043116 |
| CAT          | 11p13    | 0.117578 | 0.021534 | 0.043116 |
| CDH17        | 8q22.1   | 0.117577 | 0.021535 | 0.043116 |
| C12ORF57     | 12p13.31 | 0.117557 | 0.021557 | 0.043155 |
| MST1R        | 3p21.31  | 0.117541 | 0.021576 | 0.043188 |
| OGDH         | 7p13     | 0.117535 | 0.021582 | 0.043195 |
| SMPDL3B      | 1p35.3   | -0.11753 | 0.021584 | 0.043195 |
| MAP1LC3C     | 1q43     | 0.117508 | 0.021612 | 0.043248 |
| STX8         | 17p13.1  | -0.11748 | 0.02164  | 0.0433   |
| UBXN4        | 2q21.3   | 0.117479 | 0.021645 | 0.043305 |
| SLC5A1       | 22q12.3  | 0.117469 | 0.021657 | 0.043325 |
| LOC100130449 | 2q37.3   | 0.117453 | 0.021674 | 0.043354 |
| COLCA2       | 11q23.1  | 0.117436 | 0.021694 | 0.04339  |
| DPP6         | 7q36.2   | 0.117431 | 0.021699 | 0.043396 |
| PUM2         | 2p24.1   | 0.117426 | 0.021705 | 0.043403 |
| MPP1         | Xq28     | -0.11742 | 0.021707 | 0.043403 |
| CAPN8        | 1q41     | 0.117414 | 0.021718 | 0.043422 |
| UNC45B       | 17q12    | 0.1174   | 0.021734 | 0.043448 |
| TMEM171      | 5q13.2   | 0.117362 | 0.021778 | 0.043531 |
| RANBP17      | 5q35.1   | -0.11735 | 0.021788 | 0.043543 |
| ANKRD31      | 5q13.3   | 0.11735  | 0.02179  | 0.043543 |
| INTS13       | 12p11.23 | -0.11735 | 0.02179  | 0.043543 |
| AFAP1L1      | 5q32     | 0.117323 | 0.021821 | 0.0436   |
| TMED9        | 5q35.3   | -0.11731 | 0.021841 | 0.043635 |
| SIGLEC11     | 19q13.33 | 0.117304 | 0.021842 | 0.043635 |
| RAB4A        | 1q42.13  | 0.117293 | 0.021855 | 0.043655 |
| KCNJ6        | 21q22.13 | 0.117289 | 0.021859 | 0.043656 |
| RAVER2       | 1p31.3   | 0.117289 | 0.021859 | 0.043656 |
| KCNG2        | 18q23    | 0.117284 | 0.021865 | 0.043662 |
| C2ORF74      | 2p15     | 0.117266 | 0.021886 | 0.0437   |
| DNAH8        | 6p21.2   | 0.117255 | 0.021898 | 0.043719 |



|              |          |          |          |          |
|--------------|----------|----------|----------|----------|
| GRK5         | 10q26.11 | 0.117242 | 0.021913 | 0.043745 |
| HOXA13       | 7p15.2   | 0.117229 | 0.021928 | 0.043771 |
| SLC25A35     | 17p13.1  | -0.11717 | 0.021993 | 0.043896 |
| ZFP36        | 19q13.2  | 0.117168 | 0.021997 | 0.0439   |
| SEPTIN7P9    | 10p11.1  | -0.11715 | 0.022013 | 0.043927 |
| GFM1         | 3q25.32  | 0.117139 | 0.02203  | 0.043957 |
| FAM27B       | 9q21.11  | -0.11712 | 0.022053 | 0.043997 |
| HOOK1        | 1p32.1   | 0.117112 | 0.022061 | 0.044009 |
| MAP1S        | 19p13.11 | 0.117085 | 0.022092 | 0.044068 |
| OR5B21       | 11q12.1  | 0.117068 | 0.022112 | 0.044102 |
| CATSPERE     | 1q44     | 0.117055 | 0.022127 | 0.044127 |
| PVALB        | 22q12.3  | 0.117046 | 0.022136 | 0.044142 |
| CTSL         | 9q21.33  | 0.117009 | 0.022179 | 0.044223 |
| RINT1        | 7q22.3   | -0.117   | 0.022184 | 0.044229 |
| C7ORF69      | 7p12.3   | 0.117002 | 0.022187 | 0.044231 |
| ZFP69B       | 1p34.2   | -0.11698 | 0.022209 | 0.044269 |
| TMEM19       | 12q21.1  | 0.116917 | 0.022285 | 0.044416 |
| EZH1P        | Xp11.22  | 0.11689  | 0.022316 | 0.044475 |
| POU3F1       | 1p34.3   | 0.116872 | 0.022337 | 0.044511 |
| TMCO1        | 1q24.1   | 0.11687  | 0.022339 | 0.044511 |
| FCGR1CP      | 1q21.1   | 0.116868 | 0.022341 | 0.044511 |
| ZC3H13       | 13q14.13 | 0.116858 | 0.022354 | 0.044531 |
| NSA2         | 5q13.3   | -0.11685 | 0.022359 | 0.044537 |
| TBC1D14      | 4p16.1   | 0.116803 | 0.022417 | 0.044648 |
| CCN1         | 1p22.3   | 0.116767 | 0.022459 | 0.044728 |
| SLC47A1      | 17p11.2  | 0.116764 | 0.022462 | 0.044729 |
| CHN2         | 7p14.3   | -0.11675 | 0.022475 | 0.04475  |
| HSD3B2       | 1p12     | 0.116715 | 0.022519 | 0.044835 |
| GTF2F1       | 19p13.3  | -0.1167  | 0.022534 | 0.044859 |
| LCA5L        | 21q22.2  | -0.11667 | 0.022568 | 0.044922 |
| ZNF514       | 2q11.1   | -0.11667 | 0.022571 | 0.044924 |
| MIR9-3HG     | 15q26.1  | 0.116669 | 0.022573 | 0.044924 |
| USP18        | 22q11.21 | 0.116626 | 0.022623 | 0.045018 |
| DNAJC5       | 20q13.33 | -0.11661 | 0.02264  | 0.045048 |
| CEP76        | 18p11.21 | 0.116602 | 0.022651 | 0.045065 |
| RASL11A      | 13q12.2  | -0.11653 | 0.022731 | 0.04522  |
| GEM          | 8q22.1   | 0.116526 | 0.02274  | 0.045233 |
| SALL1        | 16q12.1  | 0.116517 | 0.02275  | 0.045249 |
| CDK20        | 9q22.1   | -0.11651 | 0.022756 | 0.045257 |
| HIST1H2BB    | 6p22.2   | -0.11649 | 0.022778 | 0.045297 |
| SKOR1        | 15q23    | 0.116477 | 0.022797 | 0.045329 |
| HBP1         | 7q22.3   | 0.116454 | 0.022824 | 0.045379 |
| MEIS1        | 2p14     | 0.116449 | 0.02283  | 0.045387 |
| HNRNPUL1     | 19q13.2  | 0.11635  | 0.022947 | 0.045614 |
| CFAP45       | 1q23.2   | -0.11635 | 0.022951 | 0.045616 |
| ELP2         | 18q12.2  | 0.116343 | 0.022955 | 0.04562  |
| CIT          | 12q24.23 | 0.116332 | 0.022968 | 0.045643 |
| GFM2         | 5q13.3   | 0.116319 | 0.022984 | 0.045669 |
| PROSER1      | 13q13.3  | -0.1163  | 0.02301  | 0.045716 |
| ATOH1        | 4q22.2   | 0.116271 | 0.02304  | 0.045769 |
| BMP5         | 6p12.1   | 0.116271 | 0.023041 | 0.045769 |
| HOXA10       | 7p15.2   | -0.11625 | 0.023071 | 0.045818 |
| LINC01001    | 11p15.5  | -0.11624 | 0.023072 | 0.045818 |
| LOC100272216 | -        | 0.116244 | 0.023073 | 0.045818 |
| BEX4         | Xq22.1   | 0.116235 | 0.023083 | 0.045834 |
| SNORD116-4   | 15q11.2  | 0.116205 | 0.023119 | 0.045901 |
| CCDC148      | 2q24.1   | 0.116184 | 0.023144 | 0.045946 |
| EMC2         | 8q23.1   | -0.11617 | 0.023157 | 0.045967 |

|           |                      |          |          |          |
|-----------|----------------------|----------|----------|----------|
| CMTM3     | 16q22.1              | 0.116168 | 0.023163 | 0.045975 |
| CLUU1OS   | 12q22                | -0.11616 | 0.023172 | 0.045989 |
| KLHL3     | 5q31.2               | 0.116155 | 0.023178 | 0.045996 |
| GRAMD1B   | 11q24.1              | 0.11615  | 0.023184 | 0.046003 |
| TRPV4     | 12q24.11             | 0.11612  | 0.023221 | 0.046071 |
| CD52      | 1p36.11              | 0.1161   | 0.023244 | 0.046114 |
| IGLON5    | 19q13.41             | 0.116089 | 0.023257 | 0.046134 |
| ANKRD26P1 | 16q11.2              | -0.11606 | 0.023292 | 0.046199 |
| FGF17     | 8p21.3               | -0.11601 | 0.023357 | 0.046324 |
| RPE65     | 1p31.3               | 0.116001 | 0.023363 | 0.046331 |
| S100Z     | 5q13.3               | 0.115976 | 0.023393 | 0.046384 |
| SLITRK2   | Xq27.3               | 0.11596  | 0.023413 | 0.04642  |
| PSMD1     | 2q37.1               | 0.115951 | 0.023423 | 0.046437 |
| ASH2L     | 8p11.23              | 0.115886 | 0.023502 | 0.046587 |
| ETFDH     | 4q32.1               | 0.115856 | 0.023537 | 0.046653 |
| ZNF552    | 19q13.43             | 0.115847 | 0.023549 | 0.046671 |
| HEXIM1    | 17q21.31             | 0.115841 | 0.023556 | 0.046681 |
| ZNF467    | 7q36.1               | 0.115818 | 0.023584 | 0.046731 |
| ABCC10    | 6p21.1               | -0.11579 | 0.023612 | 0.046783 |
| RFPL2     | 22q12.3              | -0.11579 | 0.023621 | 0.046795 |
| BMI1      | 10p12.2              | 0.11578  | 0.02363  | 0.046802 |
| ALPK1     | 4q25                 | 0.115777 | 0.023633 | 0.046802 |
| TRPC7     | 5q31.1               | 0.115777 | 0.023633 | 0.046802 |
| CCNY      | 10p11.21             | 0.115777 | 0.023634 | 0.046802 |
| ZNF300P1  | 5q33.1               | 0.115765 | 0.023647 | 0.046824 |
| CEACAM6   | 19q13.2              | 0.115763 | 0.02365  | 0.046825 |
| HAPLN1    | 5q14.3               | 0.115713 | 0.023711 | 0.046942 |
| S100A2    | 1q21.3               | -0.1157  | 0.023729 | 0.046973 |
| OPN3      | 1q43                 | 0.115682 | 0.023749 | 0.047008 |
| HIST2H3C  | 1q21.2               | -0.11563 | 0.023812 | 0.047128 |
| LYN       | 8q12.1               | 0.115627 | 0.023815 | 0.047129 |
| LOC341056 | 11q24.1              | -0.11562 | 0.023827 | 0.047148 |
| UBQLN1    | 9q21.32 9q21.2-q21.3 | 0.115613 | 0.023833 | 0.047155 |
| LYPLAL1   | 1q41                 | -0.11559 | 0.023867 | 0.047217 |
| SCGN      | 6p22.2               | 0.115568 | 0.023887 | 0.047254 |
| SNORA41   | 2q33.3               | -0.11557 | 0.023892 | 0.047257 |
| POLR3G    | 5q14.3               | -0.11553 | 0.023931 | 0.04733  |
| RASGRP2   | 11q13.1              | 0.115531 | 0.023933 | 0.04733  |
| PTHLH     | 12p11.22             | 0.115513 | 0.023955 | 0.047369 |
| OR8S1     | 12q13.11             | -0.11549 | 0.023989 | 0.047431 |
| STEAP4    | 7q21.12              | 0.115482 | 0.023993 | 0.047435 |
| SCGB1B2P  | 19q13.11             | -0.1154  | 0.024094 | 0.047628 |
| TRPC4     | 13q13.3              | 0.115381 | 0.024118 | 0.047671 |
| ANTXRL    | 10q11.22             | 0.115356 | 0.024149 | 0.047725 |
| AMHR2     | 12q13.13             | 0.115353 | 0.024152 | 0.047725 |
| ARHGEF39  | 9p13.3               | -0.11535 | 0.024152 | 0.047725 |
| PAGE2     | Xp11.21              | -0.11533 | 0.024183 | 0.047779 |
| PECAM1    | 17q23.3              | 0.115327 | 0.024184 | 0.047779 |
| ZNF826P   | 19p12                | 0.115273 | 0.024251 | 0.047907 |
| SUPT6H    | 17q11.2              | 0.115269 | 0.024256 | 0.047912 |
| GLT1D1    | 12q24.33             | 0.115256 | 0.024272 | 0.047939 |
| PREP      | 6q21                 | 0.115239 | 0.024294 | 0.047976 |
| DHDDS     | 1p36.11              | 0.115225 | 0.024311 | 0.048006 |
| VSIG10L   | 19q13.41             | 0.115194 | 0.02435  | 0.048077 |
| LINC01973 | 17q25.3              | 0.115175 | 0.024374 | 0.04812  |
| KATNA1    | 6q25.1               | -0.11516 | 0.024389 | 0.048145 |
| UTS2R     | 17q25.3              | 0.11513  | 0.02443  | 0.048222 |
| MAMDC4    | 9q34.3               | -0.11512 | 0.024437 | 0.048231 |

|           |                      |          |          |          |
|-----------|----------------------|----------|----------|----------|
| SOAT2     | 12q13.13             | -0.11512 | 0.024442 | 0.048236 |
| PPP1R3F   | Xp11.23              | -0.11511 | 0.024458 | 0.048262 |
| LINC01547 | 21q22.3              | -0.11511 | 0.02446  | 0.048262 |
| LEFTY2    | 1q42.12              | 0.115097 | 0.024471 | 0.048278 |
| IL12RB1   | 19p13.11             | 0.115086 | 0.024484 | 0.048299 |
| ACSM3     | 16p12.3              | 0.115048 | 0.024532 | 0.048389 |
| IL34      | 16q22.1              | -0.11504 | 0.024547 | 0.048411 |
| SOD2      | 6q25.3               | 0.115035 | 0.024548 | 0.048411 |
| HAT1      | 2q31.1               | -0.11503 | 0.024555 | 0.048421 |
| VCPIP1    | 8q13.1               | 0.115028 | 0.024557 | 0.048421 |
| CACNB1    | 17q12                | -0.11502 | 0.024561 | 0.048423 |
| NLN       | 5q12.3               | 0.115013 | 0.024576 | 0.048444 |
| MREG      | 2q35                 | 0.115012 | 0.024577 | 0.048444 |
| ADD3      | 10q25.1-q25.2        | 0.115006 | 0.024585 | 0.048457 |
| ANKS6     | 9q22.33              | -0.11499 | 0.024604 | 0.048489 |
| CPN2      | 3q29                 | 0.114968 | 0.024632 | 0.048539 |
| NYAP1     | 7q22.1               | 0.11496  | 0.024642 | 0.048555 |
| RGS21     | 1q31.2               | 0.114945 | 0.024661 | 0.048587 |
| DDAH1     | 1p22.3               | 0.114941 | 0.024666 | 0.048593 |
| ELMO2     | 20q13.12             | -0.11492 | 0.024694 | 0.048642 |
| LOC286359 | 9q22.33              | -0.11489 | 0.024732 | 0.04871  |
| KIF1A     | 2q37.3               | 0.114888 | 0.024733 | 0.04871  |
| HIST1H3D  | 6p22.2               | -0.11488 | 0.024738 | 0.048715 |
| SRFBP1    | 5q23.1               | 0.11485  | 0.024781 | 0.048795 |
| ZNF197    | 3p21.31              | 0.114843 | 0.02479  | 0.048807 |
| SNAR-A2   | 19q13.33             | -0.11483 | 0.024808 | 0.048838 |
| TLCD3A    | 17p13.3              | 0.114818 | 0.024822 | 0.048861 |
| SLC34A3   | 9q34.3               | -0.11481 | 0.024836 | 0.048883 |
| CEACAM7   | 19q13.2              | 0.114798 | 0.024847 | 0.048901 |
| RSRC2     | 12q24.31             | 0.114792 | 0.024854 | 0.048909 |
| DNAJB9    | 7q31.1 14q24.2-q24.3 | 0.114789 | 0.024858 | 0.04891  |
| PDE6B     | 4p16.3               | 0.114788 | 0.024859 | 0.04891  |
| EMBP1     | 1p11.2               | 0.114781 | 0.024869 | 0.048924 |
| SNORA71C  | 20q11.23             | -0.11476 | 0.024895 | 0.048968 |
| GABRQ     | Xq28                 | 0.114759 | 0.024896 | 0.048968 |
| MTPAP     | 10p11.23             | -0.11474 | 0.024917 | 0.049004 |
| SLC26A11  | 17q25.3              | -0.11472 | 0.024943 | 0.04905  |
| MAPK4     | 18q21.1-q21.2        | 0.114717 | 0.02495  | 0.049059 |
| OXR1      | 8q23.1               | 0.114711 | 0.024958 | 0.04907  |
| TINCR     | 19p13.3              | 0.114705 | 0.024965 | 0.04908  |
| EBI3      | 19p13.3              | 0.11466  | 0.025022 | 0.049187 |
| OCRL      | Xq26.1               | 0.114654 | 0.02503  | 0.049198 |
| CYP19A1   | 15q21.2              | 0.114632 | 0.025058 | 0.049249 |
| ARL4D     | 17q21.31             | -0.11462 | 0.02507  | 0.049264 |
| CCDC36    | 3p21.31              | 0.11462  | 0.025073 | 0.049264 |
| TOB1      | 17q21.33             | 0.114619 | 0.025075 | 0.049264 |
| WDR64     | 1q43                 | 0.114618 | 0.025076 | 0.049264 |
| FFAR2     | 19q13.12             | 0.114607 | 0.02509  | 0.049286 |
| PARP6     | 15q23                | 0.114587 | 0.025115 | 0.04933  |
| AP2A1     | 19q13.33             | 0.114584 | 0.02512  | 0.049335 |
| NANOS1    | 10q26.11             | -0.11456 | 0.025147 | 0.049385 |
| SPZ1      | 5q14.1               | -0.11455 | 0.025159 | 0.049403 |
| CCDC77    | 12p13.33             | -0.11453 | 0.025192 | 0.049463 |
| PAK6      | 15q15.1              | 0.114514 | 0.025208 | 0.04949  |
| ZNF211    | 19q13.43             | 0.114485 | 0.025246 | 0.049555 |
| FXVD6     | 11q23.3              | 0.114485 | 0.025247 | 0.049555 |
| WDR62     | 19q13.12             | -0.11443 | 0.025317 | 0.049689 |
| RCBTB2    | 13q14.2              | 0.114417 | 0.025333 | 0.049715 |

|            |          |          |          |          |
|------------|----------|----------|----------|----------|
| PLAC8      | 4q21.22  | 0.114401 | 0.025354 | 0.049752 |
| NKAIN3-IT1 | 8q12.3   | 0.114399 | 0.025357 | 0.049753 |
| XPO5       | 6p21.1   | -0.11438 | 0.02538  | 0.049793 |
| VBP1       | Xq28     | -0.11436 | 0.025402 | 0.049832 |
| FOXI2      | 10q26.2  | 0.114356 | 0.025412 | 0.049846 |
| ESAM       | 11q24.2  | 0.114333 | 0.025442 | 0.049901 |
| MLX        | 17q21.2  | -0.11427 | 0.025523 | 0.050053 |
| DAGLA      | 11q12.2  | -0.11425 | 0.025555 | 0.050109 |
| SLC12A7    | 5p15.33  | -0.11424 | 0.025556 | 0.050109 |
| FAM86DP    | 3p12.3   | -0.11423 | 0.025578 | 0.050146 |
| LRRC42     | 1p32.3   | -0.11421 | 0.025605 | 0.050194 |
| TMEM86B    | 19q13.42 | -0.11421 | 0.025607 | 0.050194 |
| RRAS       | 19q13.33 | -0.1142  | 0.025611 | 0.050197 |
| DHRS4L1    | 14q11.2  | -0.11418 | 0.025639 | 0.050246 |
| SNORA26    | 4q12     | -0.11418 | 0.025642 | 0.050248 |
| SPIC       | 12q23.2  | 0.114169 | 0.025655 | 0.050268 |
| SHQ1       | 3p13     | -0.11413 | 0.02571  | 0.050372 |
| OXER1      | 2p21     | -0.11412 | 0.025714 | 0.050374 |
| SAMD15     | 14q24.3  | 0.114118 | 0.025721 | 0.050382 |
| IMPAD1     | 8q12.1   | 0.114116 | 0.025723 | 0.050382 |
| SCARNA1    | 1p35.3   | -0.11411 | 0.025729 | 0.050386 |
| USP43      | 17p13.1  | 0.114111 | 0.025731 | 0.050386 |
| HAO2       | 1p12     | -0.11411 | 0.025732 | 0.050386 |
| LPAR2      | 19p13.11 | -0.1141  | 0.025742 | 0.0504   |
| SFTA1P     | 10p14    | 0.114097 | 0.025748 | 0.050406 |
| HADHB      | 2p23.3   | 0.114092 | 0.025755 | 0.050414 |
| ERCC2      | 19q13.32 | -0.11403 | 0.025832 | 0.050561 |
| SH2D3C     | 9q34.11  | 0.114017 | 0.025853 | 0.050598 |
| RMND5B     | 5q35.3   | -0.11401 | 0.025866 | 0.050617 |
| STK32A     | 5q32     | 0.114    | 0.025876 | 0.050632 |
| ADSSL1     | 14q32.33 | 0.113993 | 0.025885 | 0.050645 |
| DDX17      | 22q13.1  | 0.113984 | 0.025896 | 0.050661 |
| TCHH       | 1q21.3   | 0.113982 | 0.025899 | 0.050661 |
| PTPRA      | 20p13    | 0.113973 | 0.025911 | 0.05068  |
| SCD5       | 4q21.22  | 0.11395  | 0.025941 | 0.050732 |
| MGME1      | 20p11.23 | -0.11395 | 0.025942 | 0.050732 |
| IFT88      | 13q12.11 | -0.11394 | 0.025961 | 0.050763 |
| EDC4       | 16q22.1  | -0.11391 | 0.025991 | 0.050818 |
| PFN1P2     | 1p11.2   | 0.113902 | 0.026005 | 0.050836 |
| MORC2      | 22q12.2  | -0.1139  | 0.026006 | 0.050836 |
| AARS       | 16q22.1  | -0.11383 | 0.026095 | 0.051006 |
| SYMPK      | 19q13.32 | -0.11383 | 0.026101 | 0.051013 |
| COL6A5     | 3q22.1   | 0.11379  | 0.026153 | 0.051108 |
| NOTCH4     | 6p21.32  | 0.113777 | 0.026169 | 0.051135 |
| KNG1       | 3q27.3   | -0.11377 | 0.026178 | 0.051147 |
| GDF1       | 19p13.11 | 0.113768 | 0.026181 | 0.051148 |
| AOAH       | 7p14.2   | -0.11377 | 0.026184 | 0.05115  |
| ASRGL1     | 11q12.3  | 0.113732 | 0.026229 | 0.051232 |
| KL         | 13q13.1  | 0.113725 | 0.026239 | 0.051246 |
| EPDR1      | 7p14.1   | -0.11371 | 0.026254 | 0.051272 |
| ZNF676     | 19p12    | 0.113704 | 0.026266 | 0.05129  |
| CAND2      | 3p25.2   | 0.113694 | 0.02628  | 0.051312 |
| CETN3      | 5q14.3   | -0.11367 | 0.026308 | 0.051363 |
| RRAGD      | 6q15     | 0.11367  | 0.026311 | 0.051363 |
| LCE3D      | 1q21.3   | -0.11366 | 0.026324 | 0.051382 |
| NELL1      | 11p15.1  | 0.11363  | 0.026364 | 0.051457 |
| GPR149     | 3q25.2   | 0.113627 | 0.026368 | 0.05146  |
| ZNF772     | 19q13.43 | 0.113582 | 0.026428 | 0.051572 |

|            |                    |          |          |          |
|------------|--------------------|----------|----------|----------|
| ARNTL      | 11p15.3            | 0.113578 | 0.026434 | 0.051578 |
| PAGE1      | Xp11.23            | -0.11351 | 0.026521 | 0.051742 |
| PPP6R1     | 19q13.42           | 0.113496 | 0.026544 | 0.051782 |
| CECR2      | 22q11.1-q11.21     | 0.113483 | 0.026561 | 0.051811 |
| FOXE3      | 1p33               | -0.11347 | 0.026579 | 0.051841 |
| LINGO1     | 15q24.3            | 0.113455 | 0.026598 | 0.051873 |
| CLASP1     | 2q14.2-q14.3       | 0.113452 | 0.026603 | 0.051878 |
| DPYSL5     | 2p23.3             | 0.113448 | 0.026608 | 0.051882 |
| DUSP19     | 2q32.1             | 0.113428 | 0.026635 | 0.051929 |
| NDN        | 15q11.2            | 0.113426 | 0.026638 | 0.051931 |
| PTPN18     | 2q21.1             | 0.113419 | 0.026647 | 0.051942 |
| IL3RA      | Xp22.33 and Yp11.2 | 0.113378 | 0.026702 | 0.052046 |
| WNT5A      | 3p14.3             | 0.113342 | 0.026751 | 0.052135 |
| RSKR       | 17q11.2            | -0.11333 | 0.026765 | 0.052157 |
| FAR1       | 11p15.3            | 0.113326 | 0.026772 | 0.052166 |
| RTL8A      | Xq26.3             | -0.11331 | 0.026799 | 0.052213 |
| PLPP1      | 5q11.2             | 0.113305 | 0.026801 | 0.052213 |
| SSX4       | Xp11.23            | -0.11329 | 0.026817 | 0.052239 |
| C1ORF141   | 1p31.3             | 0.113283 | 0.026831 | 0.052261 |
| LDOC1      | Xq27.1             | 0.113258 | 0.026865 | 0.052321 |
| PLK5       | 19p13.3            | -0.11325 | 0.026869 | 0.052325 |
| CYLC1      | Xq21.1             | -0.11325 | 0.026881 | 0.052344 |
| DTNA       | 18q12.1            | 0.11324  | 0.026889 | 0.052353 |
| BRD4       | 19p13.12           | 0.113198 | 0.026946 | 0.05246  |
| HCG4       | 6p22.1             | 0.113187 | 0.026961 | 0.052483 |
| VPS35      | 16q11.2            | 0.113168 | 0.026987 | 0.05253  |
| ATP6V0E1   | 5q35.1             | -0.11316 | 0.026999 | 0.052547 |
| GPR84      | 12q13.13           | 0.113157 | 0.027002 | 0.052547 |
| STRN4      | 19q13.32           | -0.11313 | 0.02704  | 0.052616 |
| TMEM254    | 10q22.3            | 0.113116 | 0.027058 | 0.052647 |
| SAMD13     | 1p31.1             | 0.113058 | 0.027136 | 0.052794 |
| DNAJB13    | 11q13.4            | -0.11305 | 0.027154 | 0.052823 |
| FCGR1A     | 1q21.2             | 0.113039 | 0.027162 | 0.052834 |
| PABPC3     | 13q12.13           | -0.11301 | 0.0272   | 0.052902 |
| ACTA2      | 10q23.31           | 0.113006 | 0.027207 | 0.052911 |
| ZNF417     | 19q13.43           | 0.112927 | 0.027316 | 0.053118 |
| OR2AE1     | 7q22.1             | 0.112875 | 0.027388 | 0.053253 |
| RIBC2      | 22q13.31           | -0.11287 | 0.027392 | 0.053254 |
| EEF1AKNMT  | 1q24.3             | 0.112858 | 0.027412 | 0.053288 |
| AP3D1      | 19p13.3            | 0.112814 | 0.027472 | 0.0534   |
| TSTA3      | 8q24.3             | -0.1128  | 0.027493 | 0.053435 |
| FAM106A    | 17p11.2            | 0.112786 | 0.027511 | 0.053466 |
| SAA4       | 11p15.1            | -0.11278 | 0.027525 | 0.053484 |
| NKX3-2     | 4p15.33            | 0.112775 | 0.027526 | 0.053484 |
| DUSP7      | 3p21.2             | 0.112755 | 0.027554 | 0.053534 |
| NECAP1     | 12p13.31           | 0.112746 | 0.027567 | 0.053553 |
| DMKN       | 19q13.12           | 0.112729 | 0.02759  | 0.053592 |
| CPVL       | 7p14.3             | 0.11272  | 0.027601 | 0.05361  |
| NRM        | 6p21.33            | -0.11267 | 0.027673 | 0.053745 |
| PARD6G-AS1 | 18q23              | 0.112648 | 0.027702 | 0.053794 |
| MAP3K6     | 1p36.11            | 0.112646 | 0.027704 | 0.053794 |
| LSM1       | 8p11.23            | -0.11262 | 0.027735 | 0.05385  |
| TCF20      | 22q13.2 22q13.3    | 0.112616 | 0.027747 | 0.053866 |
| PPP2R3C    | 14q13.2            | 0.112603 | 0.027764 | 0.053894 |
| AGBL4      | 1p33               | 0.112595 | 0.027775 | 0.053911 |
| OCA2       | 15q12-q13.1        | -0.11259 | 0.027781 | 0.053917 |
| BMP6       | 6p24.3             | 0.112571 | 0.027809 | 0.053966 |
| MYADML2    | 17q25.3            | -0.11256 | 0.027828 | 0.053998 |

|               |          |          |          |          |
|---------------|----------|----------|----------|----------|
| GRPR          | Xp22.2   | -0.11254 | 0.02785  | 0.054035 |
| FAM3B         | 21q22.3  | -0.11252 | 0.027878 | 0.054082 |
| CTF1          | 16p11.2  | 0.112521 | 0.02788  | 0.054082 |
| IFNE          | 9p21.3   | 0.112511 | 0.027893 | 0.054102 |
| KRTAP17-1     | 17q21.2  | -0.11251 | 0.027896 | 0.054103 |
| SHKBP1        | 19q13.2  | -0.1125  | 0.027904 | 0.054115 |
| UBE2V2        | 8q11.21  | -0.1125  | 0.027911 | 0.054122 |
| SPRY4         | 5q31.3   | 0.112495 | 0.027916 | 0.054126 |
| SLC16A14      | 2q36.3   | 0.112489 | 0.027925 | 0.054138 |
| PLEKHA4       | 19q13.33 | -0.11247 | 0.027946 | 0.054174 |
| LINC01590     | 6q15     | -0.11247 | 0.027952 | 0.05418  |
| PRPF38B       | 1p13.3   | 0.112458 | 0.027967 | 0.054205 |
| JMJD7-PLA2G4B | 15q15.1  | -0.11245 | 0.027973 | 0.054211 |
| PGM1          | 1p31.3   | 0.112428 | 0.028009 | 0.054276 |
| KRT37         | 17q21.2  | -0.11243 | 0.028013 | 0.054277 |
| C1ORF115      | 1q41     | 0.112414 | 0.02803  | 0.054305 |
| SYPL2         | 1p13.3   | 0.112403 | 0.028045 | 0.054329 |
| NKX1-2        | 10q26.13 | -0.1124  | 0.028048 | 0.054331 |
| RSPO4         | 20p13    | -0.11239 | 0.028065 | 0.054355 |
| MFSD4B        | 6q21     | 0.112387 | 0.028067 | 0.054355 |
| SNORA2C       | 12q13.11 | -0.11237 | 0.028097 | 0.05441  |
| SLC32A1       | 20q11.23 | 0.112353 | 0.028115 | 0.054439 |
| FAM238C       | 10p12.1  | 0.112325 | 0.028154 | 0.054508 |
| TMEM200B      | 1p35.3   | 0.112323 | 0.028157 | 0.05451  |
| CNP           | 17q21.2  | -0.1123  | 0.028185 | 0.054558 |
| AK9           | 6q21     | -0.11229 | 0.02821  | 0.0546   |
| RAG2          | 11p12    | -0.11228 | 0.028212 | 0.0546   |
| DNAH9         | 17p12    | 0.112275 | 0.028225 | 0.05462  |
| VAMP5         | 2p11.2   | -0.11225 | 0.028255 | 0.054673 |
| TMEM8A        | 16p13.3  | -0.11225 | 0.028264 | 0.054684 |
| CLEC2B        | 12p13.31 | 0.112246 | 0.028266 | 0.054684 |
| MRGPRX2       | 11p15.1  | 0.112239 | 0.028276 | 0.054698 |
| MLEC          | 12q24.31 | 0.112226 | 0.028294 | 0.054727 |
| ENOX1         | 13q14.11 | 0.112216 | 0.028309 | 0.054743 |
| KIAA1614      | 1q25.3   | 0.112215 | 0.02831  | 0.054743 |
| ZNF283        | 19q13.31 | 0.112215 | 0.02831  | 0.054743 |
| RNF113B       | 13q32.2  | -0.11219 | 0.028346 | 0.054801 |
| APLP1         | 19q13.12 | 0.11219  | 0.028346 | 0.054801 |
| SSPO          | 7q36.1   | -0.11218 | 0.028361 | 0.054823 |
| TBK1          | 12q14.2  | 0.112178 | 0.028363 | 0.054823 |
| PAM           | 5q21.1   | 0.112159 | 0.02839  | 0.05487  |
| ZBED5         | 11p15.4  | -0.11214 | 0.028419 | 0.054922 |
| STEAP1B       | 7p15.3   | 0.112094 | 0.028482 | 0.055038 |
| SNAR-B2       | 19q13.33 | -0.11205 | 0.028544 | 0.055151 |
| FOXN2         | 2p16.3   | 0.112048 | 0.028548 | 0.055154 |
| H19           | 11p15.5  | -0.11204 | 0.028565 | 0.055182 |
| STAC2         | 17q12    | 0.112027 | 0.028578 | 0.055201 |
| SAR1B         | 5q31.1   | 0.11202  | 0.028587 | 0.055214 |
| FAM209A       | 20q13.31 | -0.11202 | 0.028594 | 0.055221 |
| TTC14         | 3q26.33  | -0.11199 | 0.028628 | 0.055281 |
| PHF20L1       | 8q24.22  | 0.111986 | 0.028636 | 0.055293 |
| NRADDP        | 3p21.31  | -0.11197 | 0.028652 | 0.055318 |
| USF1          | 1q23.3   | -0.11197 | 0.028656 | 0.055321 |
| CFAP52        | 17p13.1  | -0.11197 | 0.028666 | 0.055334 |
| PIN1P1        | 1p31.1   | -0.11196 | 0.028678 | 0.055352 |
| EXOC3         | 5p15.33  | -0.11195 | 0.02869  | 0.05537  |
| B3GALNT1      | 3q26.1   | 0.111927 | 0.028721 | 0.055425 |
| LINC00240     | 6p22.2   | -0.11192 | 0.028729 | 0.055435 |

|              |               |          |          |          |
|--------------|---------------|----------|----------|----------|
| SHISAL2A     | 1p32.3        | 0.111903 | 0.028754 | 0.055478 |
| RBFA         | 18q23         | -0.11188 | 0.028789 | 0.05554  |
| TAGLN3       | 3q13.2        | 0.111858 | 0.028819 | 0.055593 |
| NRAS         | 1p13.2        | 0.111852 | 0.028829 | 0.055602 |
| GSK3A        | 19q13.2       | -0.11185 | 0.02883  | 0.055602 |
| DCTN4        | 5q33.1        | 0.111837 | 0.02885  | 0.055636 |
| RGL2         | 6p21.32       | -0.11183 | 0.02886  | 0.055649 |
| CYTL1        | 4p16.2        | 0.111816 | 0.02888  | 0.055683 |
| SH3D21       | 1p34.3        | -0.11176 | 0.028967 | 0.055846 |
| ZNF628       | 19q13.42      | -0.11175 | 0.028977 | 0.05586  |
| INO80D       | 2q33.3        | 0.111738 | 0.028993 | 0.055884 |
| METTL2A      | 17q23.2       | -0.11174 | 0.028996 | 0.055885 |
| ALG12        | 22q13.33      | -0.11171 | 0.029031 | 0.055948 |
| RHBDF2       | 17q25.1       | -0.1117  | 0.029043 | 0.055964 |
| BTF3         | 5q13.2        | -0.1117  | 0.029049 | 0.055971 |
| HIST1H2AB    | 6p22.2        | -0.11167 | 0.029085 | 0.056035 |
| CDK9         | 9q34.11       | -0.11166 | 0.02911  | 0.056074 |
| HIST1H3I     | 6p22.1        | -0.11166 | 0.029111 | 0.056074 |
| ATP1A1       | 1p13.1        | 0.111645 | 0.029127 | 0.0561   |
| C7ORF61      | 7q22.1        | -0.11163 | 0.029149 | 0.056137 |
| ACTC1        | 15q14         | 0.111619 | 0.029165 | 0.056162 |
| MEGF11       | 15q22.31      | -0.11158 | 0.029219 | 0.05626  |
| BEND5        | 1p33          | 0.111574 | 0.029231 | 0.056278 |
| TMPO         | 12q23.1       | 0.111534 | 0.029289 | 0.056385 |
| NAA25        | 12q24.13      | 0.111505 | 0.029331 | 0.05646  |
| TAPBP1       | 12p13.31      | -0.11148 | 0.029364 | 0.056519 |
| LOC100128076 | 9q22.31       | -0.11147 | 0.02938  | 0.056544 |
| TMPRSS11F    | 4q13.2        | 0.111435 | 0.029434 | 0.056641 |
| C8ORF37      | 8q22.1        | 0.111428 | 0.029444 | 0.05665  |
| LOC646471    | 1p36.11       | -0.11143 | 0.029444 | 0.05665  |
| EPHB4        | 7q22.1        | 0.111403 | 0.029481 | 0.056716 |
| HIST1H2AK    | 6p22.1        | -0.11138 | 0.02952  | 0.056786 |
| BREA2        | 8q24.3        | -0.11135 | 0.029554 | 0.056846 |
| PGRMC1       | Xq24          | -0.11134 | 0.029579 | 0.056888 |
| MRPL33       | 2p23.2        | -0.11133 | 0.029589 | 0.0569   |
| CST6         | 11q13.1       | -0.11133 | 0.029592 | 0.0569   |
| COL5A3       | 19p13.2       | 0.111326 | 0.029594 | 0.0569   |
| THEM5        | 1q21.3        | 0.111304 | 0.029627 | 0.056958 |
| SCGB2B2      | 19q13.11      | 0.111277 | 0.029666 | 0.057028 |
| COL6A4P2     | 3q22.1        | -0.11125 | 0.029712 | 0.057112 |
| RBM15        | 1p13.3        | 0.111238 | 0.029723 | 0.057127 |
| RAB2A        | 8q12.1-q12.2  | 0.111234 | 0.02973  | 0.057135 |
| ATP5PB       | 1p13.2        | -0.11122 | 0.02975  | 0.057169 |
| RPL23AP82    | 22q13.33      | -0.1112  | 0.029781 | 0.057219 |
| LAT2         | 7q11.23       | 0.111198 | 0.029782 | 0.057219 |
| TPST2        | 22q12.1       | -0.11116 | 0.029837 | 0.057316 |
| CASC8        | 8q24.21       | -0.11116 | 0.029839 | 0.057316 |
| KCNK3        | 2p23.3        | 0.111145 | 0.029862 | 0.057355 |
| CASQ1        | 1q23.2        | 0.111121 | 0.029897 | 0.057417 |
| ERAS         | Xp11.23       | -0.1111  | 0.029922 | 0.05746  |
| MET          | 7q31.2        | 0.111073 | 0.029968 | 0.057542 |
| RP1          | 8q11.23-q12.1 | 0.111069 | 0.029975 | 0.05755  |
| RAB38        | 11q14.2       | 0.111048 | 0.030005 | 0.057603 |
| BBS2         | 16q13         | -0.11102 | 0.030053 | 0.057685 |
| DUSP9        | Xq28          | -0.11102 | 0.030054 | 0.057685 |
| KCNA5        | 12p13.32      | 0.111011 | 0.03006  | 0.057689 |
| ODF3L2       | 19p13.3       | -0.11101 | 0.030061 | 0.057689 |
| PLEKHN1      | 1p36.33       | -0.11096 | 0.030142 | 0.057838 |

|           |          |          |          |          |
|-----------|----------|----------|----------|----------|
| CCDC28A   | 6q24.1   | -0.11094 | 0.030174 | 0.057894 |
| COL13A1   | 10q22.1  | 0.110928 | 0.030185 | 0.05791  |
| FOXO3     | 6q21     | 0.110888 | 0.030245 | 0.058018 |
| LGALS17A  | 19q13.2  | -0.11089 | 0.030248 | 0.05802  |
| RNF43     | 17q22    | -0.11087 | 0.030276 | 0.058063 |
| TYRP1     | 9p23     | 0.110867 | 0.030276 | 0.058063 |
| HAPLN3    | 15q26.1  | 0.11086  | 0.030287 | 0.058078 |
| ANKK1     | 11q23.2  | -0.11084 | 0.030317 | 0.05813  |
| MGAM2     | 7q34     | 0.110814 | 0.030356 | 0.058195 |
| RELT      | 11q13.4  | -0.11081 | 0.030357 | 0.058195 |
| GLRX5     | 14q32.13 | -0.1108  | 0.030374 | 0.058222 |
| GRPEL2    | 5q32     | -0.11079 | 0.030389 | 0.058245 |
| REPS2     | Xp22.2   | 0.110789 | 0.030393 | 0.058248 |
| RAB22A    | 20q13.32 | -0.11077 | 0.030421 | 0.058295 |
| UBASH3A   | 21q22.3  | 0.110759 | 0.030439 | 0.058323 |
| IGFL1     | 19q13.32 | -0.11076 | 0.030441 | 0.058323 |
| TNFAIP8L2 | 1q21.3   | 0.110734 | 0.030476 | 0.058383 |
| LINC01096 | 4p15.33  | 0.11073  | 0.030483 | 0.058392 |
| HPX       | 11p15.4  | -0.11072 | 0.030498 | 0.058415 |
| LINC00052 | 15q25.3  | -0.11069 | 0.030536 | 0.058482 |
| MORN1     | 1p36.32  | -0.11068 | 0.030561 | 0.058524 |
| ASB15     | 7q31.32  | 0.110674 | 0.030567 | 0.058529 |
| HIST3H2A  | 1q42.13  | -0.11063 | 0.030638 | 0.05866  |
| CAVIN1    | 17q21.2  | 0.110623 | 0.030645 | 0.058668 |
| SGTB      | 5q12.3   | 0.110612 | 0.030661 | 0.058687 |
| NOL8      | 9q22.31  | -0.11061 | 0.030666 | 0.058687 |
| ACO1      | 9p21.1   | 0.110608 | 0.030667 | 0.058687 |
| PGAP3     | 17q12    | -0.11061 | 0.030667 | 0.058687 |
| TRIM25    | 17q22    | 0.110594 | 0.030688 | 0.058722 |
| IL19      | 1q32.1   | 0.110587 | 0.030699 | 0.058738 |
| DCAF16    | 4p15.31  | -0.11057 | 0.030722 | 0.058775 |
| CRHR2     | 7p14.3   | 0.110557 | 0.030745 | 0.058814 |
| TTY6B     | Yq11.223 | 0.110541 | 0.03077  | 0.058856 |
| SNORA78   | 16p13.3  | -0.11054 | 0.030773 | 0.058856 |
| CDKN2AIP  | 4q35.1   | 0.11053  | 0.030786 | 0.058876 |
| NR1H3     | 11p11.2  | -0.11049 | 0.030843 | 0.058979 |
| ETNK1     | 12p12.1  | 0.11045  | 0.030908 | 0.059099 |
| N4BP2L1   | 13q13.1  | -0.11043 | 0.03094  | 0.059153 |
| SNORA71D  | 20q11.23 | -0.11042 | 0.030947 | 0.059161 |
| ZNF805    | 19q13.43 | 0.110421 | 0.030952 | 0.059161 |
| LINC02418 | 12q24.33 | -0.11042 | 0.030952 | 0.059161 |
| PPBPP2    | 4q13.3   | -0.11042 | 0.030956 | 0.059162 |
| STEAP1    | 7q21.13  | 0.110394 | 0.030994 | 0.059229 |
| LRP12     | 8q22.3   | 0.110389 | 0.031001 | 0.059236 |
| UBE2D1    | 10q21.1  | 0.11037  | 0.03103  | 0.059286 |
| LGR5      | 12q21.1  | 0.110359 | 0.031048 | 0.059312 |
| BNIP3     | 10q26.3  | -0.11036 | 0.03105  | 0.059312 |
| MS4A3     | 11q12.1  | 0.11035  | 0.03106  | 0.059327 |
| CINP      | 14q32.31 | -0.11027 | 0.031181 | 0.059552 |
| CNN1      | 19p13.2  | 0.110266 | 0.03119  | 0.059563 |
| NDNF      | 4q27     | 0.110254 | 0.031208 | 0.059592 |
| BNIP1     | 1q21.3   | -0.11025 | 0.031211 | 0.059592 |
| CLUHP3    | 16p11.2  | -0.11022 | 0.03126  | 0.059681 |
| PPP1R27   | 17q25.3  | -0.11022 | 0.031268 | 0.059688 |
| RGS8      | 1q25.3   | 0.110214 | 0.03127  | 0.059688 |
| RTL9      | Xq23     | 0.110199 | 0.031293 | 0.059727 |
| SNW1      | 14q24.3  | 0.110192 | 0.031304 | 0.059742 |
| ZNF425    | 7q36.1   | 0.110183 | 0.031318 | 0.059762 |



|            |                 |          |          |          |
|------------|-----------------|----------|----------|----------|
| PLAC4      | 21q22.2         | -0.11017 | 0.031341 | 0.0598   |
| NMUR2      | 5q33.1          | 0.110162 | 0.03135  | 0.059806 |
| INPPL1     | 11q13.4         | -0.11016 | 0.03135  | 0.059806 |
| P4HA3      | 11q13.4         | 0.110148 | 0.031372 | 0.059843 |
| C1QTNF2    | 5q33.3          | 0.110141 | 0.031383 | 0.059857 |
| TBC1D20    | 20p13           | 0.110132 | 0.031396 | 0.059878 |
| PMF1       | 1q22            | -0.11012 | 0.031414 | 0.059906 |
| KLHL33     | 14q11.2         | 0.110116 | 0.031422 | 0.059914 |
| ASPA       | 17p13.2         | 0.110086 | 0.031468 | 0.059998 |
| MYO3A      | 10p12.1         | 0.110079 | 0.031479 | 0.060013 |
| COG7       | 16p12.2         | 0.110074 | 0.031486 | 0.060018 |
| HSP90AB1   | 6p21.1          | -0.11007 | 0.031488 | 0.060018 |
| SERPINA1   | 14q32.13        | 0.110038 | 0.031542 | 0.060116 |
| PGD        | 1p36.22         | -0.11    | 0.031595 | 0.060211 |
| CASP9      | 1p36.21         | -0.10999 | 0.031614 | 0.06024  |
| RALGDS     | 9q34.13-q34.2   | -0.10998 | 0.031638 | 0.060281 |
| ZNF433     | 19p13.2         | -0.10997 | 0.031654 | 0.060306 |
| CENPF      | 1q41            | 0.109962 | 0.031661 | 0.060313 |
| HPS5       | 11p15.1         | 0.109955 | 0.031672 | 0.060329 |
| CHEK1      | 11q24.2         | -0.10994 | 0.0317   | 0.060377 |
| HOXC13     | 12q13.13        | -0.1099  | 0.031759 | 0.060483 |
| DLG4       | 17p13.1         | 0.109888 | 0.031777 | 0.060511 |
| HLA-DRB6   | 6p21.32         | 0.109833 | 0.031863 | 0.06067  |
| IFFO1      | 12p13.31        | 0.109799 | 0.031916 | 0.060765 |
| AKAP3      | 12p13.32        | 0.109796 | 0.031921 | 0.060768 |
| MPC2       | 1q24.2          | -0.10979 | 0.031928 | 0.060772 |
| CSNK1D     | 17q25.3         | -0.10979 | 0.031929 | 0.060772 |
| CEBPD      | 8q11.21         | -0.10978 | 0.031951 | 0.060808 |
| SCT        | 11p15.5         | -0.10977 | 0.031955 | 0.060811 |
| GGT7       | 20q11.22        | -0.10976 | 0.031977 | 0.060846 |
| TMEM117    | 12q12           | -0.10974 | 0.032013 | 0.060909 |
| CFI        | 4q25            | 0.109728 | 0.032027 | 0.06093  |
| CCDC107    | 9p13.3          | -0.10972 | 0.032041 | 0.06095  |
| TEDC1      | 14q32.33        | -0.10972 | 0.032047 | 0.060955 |
| FBXL19-AS1 | 16p11.2         | 0.109714 | 0.03205  | 0.060955 |
| VEGFC      | 4q34.3          | 0.109671 | 0.032117 | 0.061078 |
| SP100      | 2q37.1          | 0.109668 | 0.032122 | 0.061082 |
| SLC38A9    | 5q11.2          | -0.10961 | 0.032211 | 0.061245 |
| LINC00663  | 19p13.11        | -0.10959 | 0.032245 | 0.061304 |
| FOXD3      | 1p31.3          | 0.10957  | 0.032277 | 0.061358 |
| LINC00628  | 1q32.1          | -0.10953 | 0.032334 | 0.061459 |
| ARSI       | 5q32            | 0.109532 | 0.032337 | 0.061459 |
| HTR7P1     | 12p13.1         | 0.109531 | 0.032339 | 0.061459 |
| KLC2       | 11q13.2         | -0.10951 | 0.032378 | 0.061526 |
| DNAJC27    | 2p23.3          | 0.109496 | 0.032396 | 0.061555 |
| IFFO2      | 1p36.13         | -0.10949 | 0.032401 | 0.061559 |
| SV2C       | 5q13.3          | 0.109476 | 0.032427 | 0.061603 |
| MIXL1      | 1q42.12         | 0.109471 | 0.032436 | 0.061613 |
| P3H3       | 12p13.31        | 0.109459 | 0.032454 | 0.061641 |
| ZNF83      | 19q13.41        | -0.10944 | 0.032481 | 0.061688 |
| EFNB1      | Xq13.1          | -0.10944 | 0.032488 | 0.061696 |
| ACO2       | 22q13.2         | 0.109346 | 0.032635 | 0.061968 |
| LINC00471  | 2q37.1          | -0.10933 | 0.032652 | 0.061996 |
| PSMD10     | Xq22.3          | -0.10929 | 0.032717 | 0.062108 |
| MSGN1      | 2p24.2          | 0.109293 | 0.032719 | 0.062108 |
| CACNB2     | 10p12.33-p12.31 | 0.109292 | 0.032721 | 0.062108 |
| TLR9       | 3p21.2          | 0.10929  | 0.032724 | 0.062109 |
| FMNL3      | 12q13.12        | 0.109284 | 0.032734 | 0.062122 |

|             |          |          |          |          |
|-------------|----------|----------|----------|----------|
| PAQR5       | 15q23    | 0.109274 | 0.032749 | 0.062144 |
| TSPAN5      | 4q23     | 0.109224 | 0.03283  | 0.062291 |
| SCARF2      | 22q11.21 | 0.109174 | 0.032911 | 0.062438 |
| CELF1       | 11p11.2  | 0.109129 | 0.032983 | 0.06257  |
| BCDIN3D-AS1 | 12q13.12 | -0.10912 | 0.033004 | 0.062604 |
| CDKN3       | 14q22.2  | -0.1091  | 0.033024 | 0.062636 |
| SCARNA21    | 17p13.1  | -0.10909 | 0.033039 | 0.062658 |
| HSPA4L      | 4q28.1   | 0.109076 | 0.033068 | 0.062708 |
| FAM157A     | 3q29     | 0.109023 | 0.033155 | 0.062867 |
| RORB        | 9q21.13  | 0.108998 | 0.033196 | 0.062937 |
| AQP12A      | 2q37.3   | -0.10899 | 0.0332   | 0.06294  |
| PARP12      | 7q34     | -0.10896 | 0.03326  | 0.063047 |
| CXXC5       | 5q31.2   | -0.10896 | 0.033264 | 0.06305  |
| OR13G1      | 1q44     | -0.10895 | 0.033279 | 0.063072 |
| CDC42EP1    | 22q13.1  | 0.108943 | 0.033284 | 0.063075 |
| SRSF4       | 1p35.3   | -0.10894 | 0.033288 | 0.063076 |
| FAM20A      | 17q24.2  | 0.108934 | 0.033299 | 0.063091 |
| ARHGAP36    | Xq26.1   | 0.10893  | 0.033305 | 0.063098 |
| TRIM61      | 4q32.3   | 0.108912 | 0.033335 | 0.063148 |
| GLDN        | 15q21.2  | 0.108909 | 0.033341 | 0.063153 |
| SAE1        | 19q13.32 | -0.1089  | 0.033361 | 0.063186 |
| ARHGEF7     | 13q34    | -0.10889 | 0.033369 | 0.063194 |
| RASGRF2     | 5q14.1   | 0.108882 | 0.033383 | 0.063216 |
| HARBI1      | 11p11.2  | -0.10886 | 0.033419 | 0.063277 |
| RHOBTB2     | 8p21.3   | 0.108856 | 0.033427 | 0.063287 |
| ACTR3BP2    | 2p11.1   | -0.10885 | 0.033438 | 0.063301 |
| UBB         | 17p11.2  | -0.10884 | 0.03345  | 0.063309 |
| ITPKC       | 19q13.2  | -0.10884 | 0.033451 | 0.063309 |
| POMZP3      | 7q11.23  | -0.10884 | 0.033452 | 0.063309 |
| MSI1        | 12q24.31 | -0.10884 | 0.03346  | 0.063309 |
| DNAH11      | 7p15.3   | 0.108835 | 0.033461 | 0.063309 |
| TAS2R41     | 7q35     | 0.108835 | 0.033461 | 0.063309 |
| CES5A       | 16q12.2  | -0.10881 | 0.033496 | 0.06337  |
| EYA4        | 6q23.2   | 0.108811 | 0.0335   | 0.06337  |
| TRADD       | 16q22.1  | -0.10877 | 0.033562 | 0.063482 |
| PFN3        | 5q35.3   | -0.10877 | 0.033569 | 0.063489 |
| MTMR4       | 17q22    | 0.10874  | 0.033617 | 0.063574 |
| MSL3P1      | 2q37.1   | -0.1087  | 0.033689 | 0.063704 |
| ZNF782      | 9q22.33  | -0.10869 | 0.033693 | 0.063705 |
| PLXDC1      | 17q12    | 0.108683 | 0.03371  | 0.063731 |
| MOSPD1      | Xq26.3   | -0.10867 | 0.033724 | 0.063752 |
| OPCML       | 11q25    | 0.108645 | 0.033772 | 0.063838 |
| GLYATL2     | 11q12.1  | -0.10858 | 0.033885 | 0.064045 |
| PYGM        | 11q13.1  | 0.108574 | 0.033889 | 0.064046 |
| SCUBE3      | 6p21.31  | 0.108561 | 0.033912 | 0.064083 |
| RGS3        | 9q32     | 0.108558 | 0.033916 | 0.064084 |
| GBP1        | 1p22.2   | 0.108546 | 0.033936 | 0.064117 |
| SCN10A      | 3p22.2   | 0.10854  | 0.033946 | 0.064129 |
| DNAJA2      | 16q11.2  | -0.10854 | 0.033953 | 0.064132 |
| ZNF57       | 19p13.3  | -0.10853 | 0.033956 | 0.064132 |
| DAXX        | 6p21.32  | -0.10853 | 0.033962 | 0.064132 |
| LYPD8       | 1q44     | 0.10853  | 0.033962 | 0.064132 |
| GH1         | 17q23.3  | 0.10853  | 0.033963 | 0.064132 |
| LINC01142   | 1q24.2   | 0.108527 | 0.033968 | 0.064134 |
| PPP1R1A     | 12q13.2  | -0.1085  | 0.03401  | 0.064209 |
| ZNF223      | 19q13.31 | 0.10848  | 0.034045 | 0.064269 |
| SLC2A5      | 1p36.23  | 0.108467 | 0.034066 | 0.064302 |
| RPRML       | 17q21.32 | -0.10844 | 0.034117 | 0.064392 |

|           |                |          |          |          |
|-----------|----------------|----------|----------|----------|
| LHX1      | 17q12          | 0.108421 | 0.034143 | 0.064435 |
| OTOP3     | 17q25.1        | 0.108402 | 0.034175 | 0.064489 |
| NUTM2F    | 9q22.32        | -0.1084  | 0.034178 | 0.064489 |
| MIA       | 19q13.2        | 0.108383 | 0.034207 | 0.064534 |
| FLOT2     | 17q11.2        | -0.10838 | 0.034215 | 0.064534 |
| CPA2      | 7q32.2         | -0.10838 | 0.034215 | 0.064534 |
| CTTNBP2   | 7q31.31        | -0.10838 | 0.034215 | 0.064534 |
| UBL3      | 13q12.3        | 0.10837  | 0.034228 | 0.064553 |
| ZNF23     | 16q22.2        | -0.10836 | 0.03425  | 0.064588 |
| CDK8      | 13q12.13       | -0.10835 | 0.034254 | 0.06459  |
| CELF3     | 1q21.3         | -0.10835 | 0.034261 | 0.064596 |
| PFKM      | 12q13.11       | -0.10834 | 0.034271 | 0.064609 |
| CLDN4     | 7q11.23        | -0.10834 | 0.034278 | 0.064617 |
| C5ORF63   | 5q23.2         | -0.10831 | 0.034324 | 0.064697 |
| KLHL18    | 3p21.31        | 0.108287 | 0.034367 | 0.064772 |
| LINC01622 | 6p25.3         | -0.10828 | 0.034381 | 0.064793 |
| GPR50     | Xq28           | -0.10826 | 0.034407 | 0.064834 |
| CYP3A4    | 7q22.1         | 0.108261 | 0.034411 | 0.064837 |
| ANKRD34C  | 15q25.1        | 0.108251 | 0.034427 | 0.06486  |
| ZNF98     | 19p12          | 0.108248 | 0.034432 | 0.064861 |
| VAV3      | 1p13.3         | -0.10825 | 0.034434 | 0.064861 |
| TRIM27    | 6p22.1         | -0.10824 | 0.034438 | 0.064864 |
| C8ORF48   | 8p22           | 0.108206 | 0.034503 | 0.064979 |
| LRGUK     | 7q33           | -0.10818 | 0.03455  | 0.065062 |
| ANAPC2    | 9q34.3         | -0.10818 | 0.034555 | 0.065065 |
| SLCO1C1   | 12p12.2        | 0.108158 | 0.034584 | 0.065113 |
| ZP2       | 16p12.3-p12.2  | -0.10815 | 0.034598 | 0.065134 |
| SIPA1     | 11q13.1        | -0.10815 | 0.034603 | 0.065137 |
| PON3      | 7q21.3         | 0.108144 | 0.034606 | 0.065137 |
| NYNRIN    | 14q12          | 0.108143 | 0.034609 | 0.065137 |
| ANAPC13   | 3q22.2         | -0.10814 | 0.034621 | 0.065152 |
| TBC1D9B   | 5q35.3         | 0.108126 | 0.034636 | 0.065176 |
| ZDHHC19   | 3q29           | -0.10812 | 0.034649 | 0.065193 |
| NOL4L     | 20q11.21       | -0.10811 | 0.034671 | 0.065228 |
| GABRG1    | 4p12           | -0.10809 | 0.034696 | 0.065269 |
| RGL1      | 1q25.3         | 0.108086 | 0.034704 | 0.065276 |
| MGP       | 12p12.3        | 0.108085 | 0.034706 | 0.065276 |
| VRTN      | 14q24.3        | 0.108029 | 0.034801 | 0.065449 |
| ISLR      | 15q24.1        | 0.107997 | 0.034855 | 0.065544 |
| TULP3     | 12p13.33       | 0.107968 | 0.034905 | 0.065631 |
| SMARCB1   | 22q11.23 22q11 | -0.10797 | 0.034909 | 0.065633 |
| KLF1      | 19p13.13       | -0.10796 | 0.034916 | 0.06564  |
| TOGARAM2  | 2p23.2         | -0.10792 | 0.034992 | 0.065777 |
| FDFT1     | 8p23.1         | 0.107896 | 0.035026 | 0.065834 |
| TMEM130   | 7q22.1         | 0.107867 | 0.035075 | 0.06592  |
| TMEM179   | 14q32.33       | 0.107848 | 0.035107 | 0.065975 |
| HSPB1     | 7q11.23        | -0.10784 | 0.035114 | 0.065981 |
| OR2A4     | 6q23.2         | 0.107819 | 0.035157 | 0.066055 |
| TMEM133   | 11q22.1        | 0.107816 | 0.035162 | 0.066059 |
| RFC1      | 4p14           | 0.107796 | 0.035197 | 0.066119 |
| SV2A      | 1q21.2         | 0.107776 | 0.035232 | 0.066177 |
| EEF2K     | 16p12.2        | 0.107737 | 0.035298 | 0.066296 |
| TAF2      | 8q24.12        | 0.107732 | 0.035307 | 0.066306 |
| ZNF878    | 19p13.2        | -0.10773 | 0.035314 | 0.066313 |
| POLDIP3   | 22q13.2        | 0.107715 | 0.035335 | 0.066347 |
| GABRA2    | 4p12           | 0.107667 | 0.035417 | 0.066494 |
| MEG3      | 14q32.2        | -0.10766 | 0.03543  | 0.066512 |
| DENND6A   | 3p14.3         | 0.107652 | 0.035443 | 0.066531 |

|           |               |          |          |          |
|-----------|---------------|----------|----------|----------|
| DNASE2    | 19p13.13      | -0.10764 | 0.035459 | 0.066555 |
| KMT5B     | 11q13.2       | 0.107603 | 0.035528 | 0.066678 |
| CHST14    | 15q15.1       | 0.107551 | 0.035617 | 0.066838 |
| NUDT19    | 19q13.11      | -0.10754 | 0.035628 | 0.066852 |
| MRPL39    | 21q21.3       | -0.1075  | 0.035707 | 0.066995 |
| MAP9      | 4q32.1        | 0.107484 | 0.035732 | 0.067036 |
| NELL2     | 12q12         | 0.10748  | 0.03574  | 0.067044 |
| AKR1B15   | 7q33          | 0.107454 | 0.035784 | 0.06712  |
| TIGD7     | 16p13.3       | -0.10739 | 0.0359   | 0.067332 |
| FAM126A   | 7p15.3        | 0.107378 | 0.035917 | 0.067357 |
| SIM2      | 21q22.13      | -0.10736 | 0.035951 | 0.067414 |
| BLVRB     | 19q13.2       | -0.10736 | 0.035955 | 0.067415 |
| ATP6V0A4  | 7q34          | -0.10734 | 0.035983 | 0.067462 |
| CAMKK1    | 17p13.2       | -0.10733 | 0.035992 | 0.067467 |
| CEACAM22P | 19q13.31      | -0.10733 | 0.035994 | 0.067467 |
| TRIM16L   | 17p11.2       | 0.107332 | 0.035995 | 0.067467 |
| EIF5      | 14q32.32      | 0.107327 | 0.036005 | 0.067478 |
| ACTG2     | 2p13.1        | 0.107311 | 0.036033 | 0.067524 |
| NPHP3     | 3q22.1        | -0.10726 | 0.036123 | 0.067687 |
| LIX1      | 5q15          | 0.107201 | 0.036224 | 0.06787  |
| SLC5A11   | 16p12.1       | -0.10718 | 0.03626  | 0.067932 |
| CCDC89    | 11q14.1       | 0.107158 | 0.0363   | 0.067999 |
| MROH5     | 8q24.3        | -0.10714 | 0.03633  | 0.068049 |
| CREG2     | 2q11.2        | 0.107128 | 0.036353 | 0.06808  |
| AGO2      | 8q24.3        | 0.107128 | 0.036353 | 0.06808  |
| TUFT1     | 1q21.3        | 0.107118 | 0.036371 | 0.068106 |
| LGI3      | 8p21.3        | -0.10711 | 0.036383 | 0.068123 |
| ADGRB1    | 8q24.3        | 0.107097 | 0.036406 | 0.068159 |
| COL22A1   | 8q24.23-q24.3 | 0.107095 | 0.03641  | 0.068159 |
| CCDC39    | 3q26.33       | 0.107094 | 0.036412 | 0.068159 |
| KEAP1     | 19p13.2       | -0.10709 | 0.036424 | 0.068174 |
| PCYT1B    | Xp22.11       | 0.107085 | 0.036427 | 0.068174 |
| SCAF4     | 21q22.11      | 0.107079 | 0.036438 | 0.068188 |
| KRCC1     | 2p11.2        | 0.107077 | 0.036443 | 0.06819  |
| BBS1      | 11q13.2       | 0.107031 | 0.036524 | 0.068335 |
| PEX13     | 2p15          | 0.107013 | 0.036555 | 0.068388 |
| ZNF22     | 10q11.21      | 0.107001 | 0.036576 | 0.06842  |
| ABCA10    | 17q24.3       | 0.106975 | 0.036622 | 0.0685   |
| MRAP      | 21q22.11      | 0.106968 | 0.036634 | 0.068516 |
| TMCO3     | 13q34         | 0.106957 | 0.036653 | 0.068545 |
| PCDH11Y   | Yp11.2        | 0.106932 | 0.036698 | 0.068623 |
| VWA7      | 6p21.33       | 0.106901 | 0.036752 | 0.068717 |
| PRO0628   | 20q12         | -0.10684 | 0.036858 | 0.068909 |
| GDF15     | 19p13.11      | -0.10684 | 0.036861 | 0.068909 |
| GRIK4     | 11q23.3       | 0.106828 | 0.036883 | 0.06894  |
| BCL2A1    | 15q25.1       | 0.106826 | 0.036885 | 0.06894  |
| SUOX      | 12q13.2       | 0.106808 | 0.036918 | 0.068996 |
| MYO19     | 17q12         | -0.10679 | 0.036943 | 0.069036 |
| ACSF3     | 16q24.3       | -0.10679 | 0.036958 | 0.069058 |
| ELF5      | 11p13         | -0.10678 | 0.036973 | 0.069079 |
| ZNF546    | 19q13.2       | 0.106767 | 0.036991 | 0.069107 |
| PLXNA3    | Xq28          | -0.10672 | 0.037078 | 0.069263 |
| GLIPR1    | 12q21.2       | 0.106706 | 0.0371   | 0.069296 |
| MRPS35    | 12p11.22      | -0.10669 | 0.037128 | 0.069343 |
| SEC13     | 3p25.3        | -0.10667 | 0.03717  | 0.069415 |
| ACAD10    | 12q24.12      | -0.10666 | 0.037187 | 0.069439 |
| DCDC2     | 6p22.3        | 0.106638 | 0.037221 | 0.069497 |
| GRM1      | 6q24.3        | 0.106633 | 0.03723  | 0.069508 |

|            |               |          |          |          |
|------------|---------------|----------|----------|----------|
| KLF3-AS1   | 4p14          | -0.10662 | 0.037249 | 0.069536 |
| ERICH3     | 1p31.1        | 0.10662  | 0.037253 | 0.069536 |
| HSPA12A    | 10q25.3       | -0.1066  | 0.037287 | 0.069595 |
| PDE1B      | 12q13.2       | 0.106582 | 0.03732  | 0.069649 |
| TTC7A      | 2p21          | 0.106581 | 0.037323 | 0.069649 |
| TSACC      | 1q22          | -0.10658 | 0.037333 | 0.06966  |
| TRPM4      | 19q13.33      | 0.106573 | 0.037338 | 0.069663 |
| MPP6       | 7p15.3        | -0.10657 | 0.037343 | 0.069666 |
| SCNN1B     | 16p12.2       | 0.106562 | 0.037357 | 0.069686 |
| UGT2A3     | 4q13.2        | 0.106527 | 0.037419 | 0.069793 |
| AP4B1      | 1p13.2        | -0.10653 | 0.037421 | 0.069793 |
| C1ORF140   | 1q41          | 0.106496 | 0.037476 | 0.069886 |
| ANKS4B     | 16p12.2       | 0.106495 | 0.037478 | 0.069886 |
| ALG9       | 11q23.1       | -0.10647 | 0.037519 | 0.069955 |
| NFIA       | 1p31.3        | 0.106445 | 0.037568 | 0.070041 |
| RAB12      | 18p11.22      | 0.106433 | 0.037589 | 0.070073 |
| TARDBP     | 1p36.22       | -0.10643 | 0.037597 | 0.070082 |
| LEAP2      | 5q31.1        | -0.10639 | 0.037671 | 0.070214 |
| CD244      | 1q23.3        | 0.106357 | 0.037726 | 0.07031  |
| OSBP2      | 22q12.2       | -0.10635 | 0.037737 | 0.070323 |
| STK17A     | 7p13          | 0.10634  | 0.037756 | 0.070353 |
| DENND5A    | 11p15.4       | 0.106338 | 0.037762 | 0.070355 |
| FGG        | 4q32.1        | -0.10634 | 0.037766 | 0.070358 |
| GORASP2    | 2q31.1        | 0.10633  | 0.037776 | 0.070369 |
| PSTPIP1    | 15q24.3       | 0.106305 | 0.037821 | 0.070446 |
| URB1       | 21q22.11      | 0.106282 | 0.037862 | 0.070517 |
| CPLX4      | 18q21.32      | 0.106274 | 0.037877 | 0.070538 |
| NLRP9      | 19q13.42      | 0.106266 | 0.037892 | 0.070559 |
| KRTAP10-11 | 21q22.3       | -0.10626 | 0.037911 | 0.070587 |
| RAC3       | 17q25.3       | -0.10625 | 0.037917 | 0.070593 |
| TMPRSS11D  | 4q13.2        | 0.106216 | 0.037982 | 0.070706 |
| SLC15A1    | 13q32.2-q32.3 | -0.1062  | 0.038014 | 0.070759 |
| NTF3       | 12p13.31      | 0.106192 | 0.038027 | 0.070778 |
| NLRP6      | 11p15.5       | -0.10616 | 0.038092 | 0.070887 |
| RTN4       | 2p16.1        | 0.106156 | 0.038093 | 0.070887 |
| TMX4       | 20p12.3       | 0.106149 | 0.038105 | 0.070904 |
| MGAT4A     | 2q11.2        | 0.10613  | 0.038139 | 0.070959 |
| TEX14      | 17q22         | -0.10612 | 0.038151 | 0.070976 |
| UBE2Q1     | 1q21.3        | 0.10611  | 0.038177 | 0.071016 |
| LINC00488  | 3q13.13       | -0.1061  | 0.038196 | 0.071047 |
| USB1       | 16q21         | -0.10608 | 0.03823  | 0.071103 |
| TPM3P9     | 19q13.42      | -0.10605 | 0.038281 | 0.07119  |
| ZNF286A    | 17p12         | 0.10602  | 0.038341 | 0.071295 |
| SLC6A13    | 12p13.33      | -0.106   | 0.038387 | 0.071374 |
| ARMC5      | 16p11.2       | -0.10599 | 0.038404 | 0.071399 |
| PLA2G15    | 16q22.1       | -0.10597 | 0.038431 | 0.071443 |
| MAPK14     | 6p21.31       | 0.105955 | 0.03846  | 0.071487 |
| TLCD3B     | 16p11.2       | 0.105953 | 0.038464 | 0.071487 |
| ANGPTL3    | 1p31.3        | -0.10595 | 0.038465 | 0.071487 |
| IQSEC3     | 12p13.33      | 0.105888 | 0.038584 | 0.071701 |
| POP1       | 8q22.2        | -0.10587 | 0.038617 | 0.071756 |
| ZC3H15     | 2q32.1        | -0.10587 | 0.038624 | 0.071763 |
| HNRNPUL2   | 11q12.3       | 0.105847 | 0.03866  | 0.071823 |
| LACC1      | 13q14.11      | 0.105837 | 0.038678 | 0.071849 |
| CNIH1      | 14q22.2       | 0.105829 | 0.038692 | 0.071869 |
| TMEM62     | 15q15.2       | 0.105824 | 0.038701 | 0.071879 |
| TRIM69     | 15q21.1       | 0.10581  | 0.038728 | 0.071922 |
| S100G      | Xp22.2        | 0.105786 | 0.038773 | 0.071999 |

|             |              |          |          |          |
|-------------|--------------|----------|----------|----------|
| LRP1B       | 2q22.1-q22.2 | 0.10577  | 0.038801 | 0.072045 |
| SNORD116-28 | 15q11.2      | 0.10573  | 0.038877 | 0.072172 |
| GRIK5       | 19q13.2      | 0.10573  | 0.038877 | 0.072172 |
| NDRG2       | 14q11.2      | 0.10572  | 0.038895 | 0.072198 |
| GAMT        | 19p13.3      | -0.10571 | 0.038907 | 0.072214 |
| TRIM32      | 9q33.1       | 0.105696 | 0.03894  | 0.072269 |
| RAD54B      | 8q22.1       | -0.10569 | 0.038956 | 0.072292 |
| MAGEA4      | Xq28         | -0.10568 | 0.038962 | 0.072296 |
| UBQLN3      | 11p15.4      | 0.105681 | 0.038968 | 0.0723   |
| IGSF3       | 1p13.1       | 0.105669 | 0.038989 | 0.072332 |
| GYPC        | 2q14.3       | 0.105664 | 0.038998 | 0.072344 |
| SREBF1      | 17p11.2      | 0.10564  | 0.039045 | 0.072422 |
| MORN3       | 12q24.31     | -0.10562 | 0.039078 | 0.072478 |
| COQ8A       | 1q42.13      | -0.10562 | 0.039087 | 0.072489 |
| DEFB136     | 8p23.1       | -0.10561 | 0.039094 | 0.072494 |
| SNORA7B     | 3q21.3       | -0.1056  | 0.03911  | 0.072517 |
| SNORA11E    | Xp11.22      | -0.1056  | 0.03912  | 0.072528 |
| F8          | Xq28         | 0.105586 | 0.039145 | 0.072568 |
| ZBTB44      | 11q24.3      | 0.105582 | 0.039152 | 0.072575 |
| FCGR1B      | 1p11.2       | 0.105575 | 0.039165 | 0.072593 |
| TAF8        | 6p21.1       | 0.105569 | 0.039177 | 0.072607 |
| LIF         | 22q12.2      | 0.105555 | 0.039203 | 0.072649 |
| FAM9A       | Xp22.31      | -0.10555 | 0.039218 | 0.07267  |
| FABP12      | 8q21.13      | 0.105545 | 0.039222 | 0.07267  |
| FABP4       | 8q21.13      | 0.105535 | 0.039239 | 0.072688 |
| TCIM        | 8p11.21      | 0.105534 | 0.039242 | 0.072688 |
| VWA5A       | 11q24.2      | 0.105534 | 0.039242 | 0.072688 |
| SMG9        | 19q13.31     | -0.1055  | 0.039304 | 0.072795 |
| SYN2        | 3p25.2       | 0.105479 | 0.039344 | 0.072864 |
| IL10        | 1q32.1       | 0.105474 | 0.039355 | 0.072877 |
| AGRN        | 1p36.33      | 0.105466 | 0.039368 | 0.072895 |
| CD247       | 1q24.2       | 0.105461 | 0.039379 | 0.072908 |
| XAGE3       | Xp11.22      | -0.10544 | 0.039421 | 0.07298  |
| ZNF543      | 19q13.43     | 0.105403 | 0.039487 | 0.073095 |
| GPX5        | 6p22.1       | 0.105392 | 0.039508 | 0.073126 |
| SMYD1       | 2p11.2       | 0.105386 | 0.03952  | 0.073135 |
| SOX6        | 11p15.2      | 0.105385 | 0.039522 | 0.073135 |
| AP3M1       | 10q22.2      | 0.105384 | 0.039524 | 0.073135 |
| STX5        | 11q12.3      | -0.10538 | 0.039534 | 0.073148 |
| GRAMD2A     | 15q23        | -0.10534 | 0.039606 | 0.073273 |
| RAB39A      | 11q22.3      | 0.105316 | 0.039651 | 0.073351 |
| GALNT13     | 2q23.3-q24.1 | 0.105311 | 0.039661 | 0.07336  |
| SNORA12     | 10q24.31     | -0.10531 | 0.039663 | 0.07336  |
| NCKAP5      | 2q21.2       | 0.105302 | 0.039678 | 0.073381 |
| GALNT17     | 7q11.22      | 0.105288 | 0.039705 | 0.073423 |
| HMGCS2      | 1p12         | 0.105273 | 0.039734 | 0.073469 |
| ADGRG3      | 16q21        | 0.105262 | 0.039754 | 0.073496 |
| PLAGL2      | 20q11.21     | -0.10526 | 0.039756 | 0.073496 |
| ZNF471      | 19q13.43     | 0.105255 | 0.039767 | 0.073511 |
| STPG4       | 2p21         | -0.10524 | 0.039788 | 0.073542 |
| SSR2        | 1q22         | -0.1052  | 0.039863 | 0.073674 |
| ACAP1       | 17p13.1      | 0.105198 | 0.039876 | 0.073691 |
| DYNLRB2     | 16q23.2      | -0.1052  | 0.03988  | 0.073692 |
| RGR         | 10q23.1      | -0.10519 | 0.039892 | 0.073704 |
| SNX7        | 1p21.3       | 0.105188 | 0.039894 | 0.073704 |
| CHST9       | 18q11.2      | 0.105166 | 0.039935 | 0.073774 |
| SIGLEC14    | 19q13.41     | 0.105161 | 0.039945 | 0.073786 |
| ISM2        | 14q24.3      | -0.10515 | 0.039961 | 0.073809 |

|          |                       |          |          |          |
|----------|-----------------------|----------|----------|----------|
| IL4I1    | 19q13.33              | 0.105144 | 0.039977 | 0.073827 |
|          | 5-Mar 10q23.32-q23.33 | 0.105141 | 0.039983 | 0.073827 |
| RNF4     | 4p16.3                | 0.10514  | 0.039985 | 0.073827 |
| BCAR1    | 16q23.1               | 0.105139 | 0.039986 | 0.073827 |
| SFTPB    | 2p11.2                | -0.10513 | 0.040007 | 0.073858 |
| CLEC4E   | 12p13.31              | 0.105124 | 0.040016 | 0.073868 |
| METTL21A | 2q33.3                | -0.10511 | 0.040042 | 0.07391  |
| MOSPD2   | Xp22.2                | 0.105078 | 0.040103 | 0.074015 |
| DTX4     | 11q12.1               | 0.105061 | 0.040136 | 0.074061 |
| CLEC1A   | 12p13.2               | 0.10506  | 0.040137 | 0.074061 |
| PGM5     | 9q21.11               | 0.105059 | 0.040139 | 0.074061 |
| ADCY1    | 7p12.3                | 0.105031 | 0.040192 | 0.07414  |
| CHORDC1  | 11q14.3               | -0.10503 | 0.040192 | 0.07414  |
| AP3B2    | 15q25.2               | 0.10503  | 0.040195 | 0.07414  |
| TUT4     | 1p32.3                | 0.105029 | 0.040196 | 0.07414  |
| MACROD2  | 20p12.1               | 0.104938 | 0.040372 | 0.074456 |
| LRIG2    | 1p13.2                | 0.104914 | 0.040417 | 0.074534 |
| WDR41    | 5q13.3-q14.1          | 0.104911 | 0.040422 | 0.074535 |
| ADH4     | 4q23                  | -0.10487 | 0.040498 | 0.074668 |
| COPZ2    | 17q21.32              | 0.104839 | 0.040561 | 0.074777 |
| LZTS3    | 20p13                 | -0.10484 | 0.040568 | 0.074785 |
| COX4I2   | 20q11.21              | -0.10483 | 0.040575 | 0.074787 |
| CASP8    | 2q33.1                | 0.104831 | 0.040577 | 0.074787 |
| MICU2    | 13q12.11              | -0.10481 | 0.040611 | 0.074842 |
| TBC1D26  | 17p12                 | -0.10479 | 0.040658 | 0.074922 |
| PHF24    | 9p13.3                | 0.10478  | 0.040675 | 0.074947 |
| ARID5A   | 2q11.2                | 0.104762 | 0.04071  | 0.075004 |
| TMPRSS5  | 11q23.2               | -0.10475 | 0.040735 | 0.075043 |
| PHLDB3   | 19q13.31              | -0.10473 | 0.040764 | 0.075091 |
| ZNF234   | 19q13.31              | 0.104669 | 0.04089  | 0.075315 |
| PRR29    | 17q23.3               | 0.104662 | 0.040903 | 0.075333 |
| HSCB     | 22q12.1               | -0.10462 | 0.040992 | 0.075488 |
| ZSCAN16  | 6p22.1                | -0.10459 | 0.041043 | 0.075576 |
| SLC26A2  | 5q32                  | 0.104567 | 0.041087 | 0.07565  |
| HSH2D    | 19p13.11              | -0.10456 | 0.041091 | 0.075651 |
| AMBRA1   | 11p11.2               | 0.104555 | 0.04111  | 0.075678 |
| WSCD2    | 12q23.3               | 0.104544 | 0.041132 | 0.075713 |
| CLCN1    | 7q34                  | -0.10454 | 0.041138 | 0.075716 |
| PAMR1    | 11p13                 | 0.104504 | 0.04121  | 0.075843 |
| CROT     | 7q21.12               | 0.104498 | 0.041221 | 0.075856 |
| GRIA2    | 4q32.1                | 0.104472 | 0.041273 | 0.075944 |
| MBOAT1   | 6p22.3                | 0.10446  | 0.041295 | 0.075977 |
| STXBP6   | 14q12                 | 0.104426 | 0.041363 | 0.076095 |
| GUCA2B   | 1p34.2                | 0.104423 | 0.041368 | 0.076095 |
| PLEKHH2  | 2p21                  | 0.104422 | 0.04137  | 0.076095 |
| NUDT2    | 9p13.3                | -0.10442 | 0.041383 | 0.076111 |
| THBS4    | 5q14.1                | 0.104405 | 0.041404 | 0.076143 |
| ATG10    | 5q14.1-q14.2          | -0.1044  | 0.04142  | 0.076166 |
| TXNL4A   | 18q23                 | -0.10439 | 0.041433 | 0.076183 |
| EMC3     | 3p25.3                | -0.10437 | 0.041479 | 0.07626  |
| ZNF740   | 12q13.13              | 0.104354 | 0.041504 | 0.076299 |
| RAB23    | 6p12.1-p11.2          | 0.104338 | 0.041534 | 0.076344 |
| TRIM65   | 17q25.1               | -0.10434 | 0.041536 | 0.076344 |
| NACAD    | 7p13                  | 0.10433  | 0.041551 | 0.076359 |
| GNGT1    | 7q21.3                | -0.10433 | 0.041552 | 0.076359 |
| AIRE     | 21q22.3               | -0.10431 | 0.041589 | 0.076419 |
| TMEM14A  | 6p12.2                | -0.10431 | 0.041592 | 0.076419 |
| UCP2     | 11q13.4               | 0.104281 | 0.041647 | 0.076514 |

|             |              |          |          |          |
|-------------|--------------|----------|----------|----------|
| TMEM176B    | 7q36.1       | -0.10427 | 0.041664 | 0.076534 |
| BCL6B       | 17p13.1      | 0.104271 | 0.041667 | 0.076534 |
| THOC1       | 18p11.32     | -0.10426 | 0.041679 | 0.07655  |
| OR2T34      | 1q44         | 0.10423  | 0.041747 | 0.076669 |
| AP1M1       | 19p13.11     | -0.10421 | 0.041789 | 0.076739 |
| CRYL1       | 13q12.11     | -0.1042  | 0.041814 | 0.076777 |
| URGCP       | 7p13         | -0.10417 | 0.041856 | 0.076848 |
| GPR12       | 13q12.13     | 0.104153 | 0.041899 | 0.07692  |
| TTC19       | 17p12        | 0.10412  | 0.041965 | 0.077034 |
| CCDC152     | 5p12         | 0.104108 | 0.041989 | 0.07707  |
| ZBTB25      | 14q23.3      | 0.1041   | 0.042004 | 0.077091 |
| OR10J1      | 1q23.2       | 0.104076 | 0.042052 | 0.077172 |
| KLHDC8A     | 1q32.1       | 0.104069 | 0.042066 | 0.077189 |
| MYOC        | 1q24.3       | 0.104066 | 0.042071 | 0.077192 |
| BAG1        | 9p13.3       | 0.104044 | 0.042116 | 0.077267 |
| ACVR2B-AS1  | 3p22.2       | -0.10403 | 0.042137 | 0.0773   |
| LZTS1       | 8p21.3       | 0.104014 | 0.042176 | 0.077359 |
| AP1S2       | Xp22.2       | 0.104013 | 0.042177 | 0.077359 |
| SDCCAG8     | 1q43-q44     | 0.104008 | 0.042188 | 0.077372 |
| APOC3       | 11q23.3      | -0.104   | 0.042198 | 0.077382 |
| TWF1        | 12q12        | 0.103996 | 0.042211 | 0.077399 |
| TNFRSF8     | 1p36.22      | 0.103994 | 0.042214 | 0.077399 |
| KRTAP5-AS1  | 11p15.5      | 0.103957 | 0.042289 | 0.077529 |
| BCAP29      | 7q22.3       | 0.103949 | 0.042305 | 0.077551 |
| NABP1       | 2q32.3       | -0.10394 | 0.042316 | 0.077564 |
| PALM2-AKAP2 | 9q31.3       | 0.103923 | 0.042356 | 0.077631 |
| DCTN1       | 2p13.1       | 0.103864 | 0.042475 | 0.077841 |
| NIT1        | 1q23.3       | -0.10386 | 0.042488 | 0.077858 |
| VENTXP1     | Xp21.3       | -0.10384 | 0.04252  | 0.077908 |
| WNT10B      | 12q13.12     | -0.10382 | 0.042561 | 0.077973 |
| NYAP2       | 2q36.3       | 0.103819 | 0.042564 | 0.077973 |
| MEX3A       | 1q22         | -0.10382 | 0.042566 | 0.077973 |
| TULP2       | 19q13.33     | 0.103791 | 0.04262  | 0.078065 |
| SRP9        | 1q42.12      | 0.103774 | 0.042655 | 0.078121 |
| NXN         | 17p13.3      | 0.103741 | 0.042722 | 0.078236 |
| GPAT2       | 2q11.2       | 0.103734 | 0.042736 | 0.078247 |
| MYT1        | 20q13.33     | -0.10373 | 0.042736 | 0.078247 |
| GUCY2GP     | 10q25.2      | -0.10373 | 0.04274  | 0.078247 |
| MIDN        | 19p13.3      | 0.1037   | 0.042803 | 0.078356 |
| RFX5        | 1q21.3       | 0.103696 | 0.042811 | 0.078364 |
| SLC7A7      | 14q11.2      | 0.103693 | 0.042818 | 0.07837  |
| IRGC        | 19q13.31     | 0.103684 | 0.042837 | 0.078396 |
| FARS2       | 6p25.1       | -0.10367 | 0.042856 | 0.078425 |
| CCDC190     | 1q23.3       | 0.103672 | 0.042861 | 0.078426 |
| TAF1        | 3p14.1       | 0.103658 | 0.042889 | 0.07847  |
| SNORA56     | Xq28         | -0.10364 | 0.042923 | 0.078526 |
| POLD4       | 11q13.2      | -0.10364 | 0.042935 | 0.07854  |
| TTYH2       | 17q25.1      | 0.103616 | 0.042974 | 0.078602 |
| SNRPA1      | 15q26.3      | -0.10361 | 0.042976 | 0.078602 |
| DERL3       | 22q11.23     | 0.10361  | 0.042986 | 0.078613 |
| ZNF679      | 7q11.21      | -0.1036  | 0.042997 | 0.078622 |
| MAGEA3      | Xq28         | -0.1036  | 0.043    | 0.078622 |
| NDC1        | 1p32.3       | 0.103596 | 0.043014 | 0.078641 |
| CFC1B       | 2q21.1       | 0.103571 | 0.043065 | 0.078718 |
| ARMC7       | 17q25.1      | -0.10357 | 0.043066 | 0.078718 |
| CCIN        | 9p13.3       | 0.103568 | 0.04307  | 0.078718 |
| STAC        | 3p22.3-p22.2 | 0.103568 | 0.043071 | 0.078718 |
| MRO         | 18q21.2      | 0.103565 | 0.043076 | 0.078719 |



|           |            |          |          |          |
|-----------|------------|----------|----------|----------|
| PANK4     | 1p36.32    | -0.10356 | 0.043095 | 0.078742 |
|           | 2-Mar 1q41 | 0.103555 | 0.043097 | 0.078742 |
| LOC399815 | 10q26.13   | -0.10355 | 0.043106 | 0.078749 |
| TMEM161B  | 5q14.3     | -0.10355 | 0.043108 | 0.078749 |
| DENR      | 12q24.31   | -0.10355 | 0.043115 | 0.078755 |
| PCDHB18P  | 5q31.3     | 0.103537 | 0.043133 | 0.07878  |
| TPI1      | 12p13.31   | -0.10352 | 0.043162 | 0.078827 |
| SVOP      | 12q24.11   | 0.103516 | 0.043176 | 0.078844 |
| HSD17B13  | 4q22.1     | -0.10351 | 0.043182 | 0.078849 |
| MAP3K12   | 12q13.13   | 0.103507 | 0.043195 | 0.07886  |
| HSP90AA1  | 14q32.31   | 0.103506 | 0.043197 | 0.07886  |
| SPPL3     | 12q24.31   | -0.1035  | 0.043203 | 0.078864 |
| MAGEB16   | Xp21.1     | -0.10349 | 0.043226 | 0.078899 |
| H1FX      | 3q21.3     | -0.10347 | 0.043264 | 0.078962 |
| NCAPG     | 4p15.31    | -0.10345 | 0.043306 | 0.079032 |
| PROC      | 2q14.3     | -0.10344 | 0.043337 | 0.079081 |
| PTGDR2    | 11q12.2    | 0.103434 | 0.043342 | 0.079082 |
| PTK7      | 6p21.1     | -0.10342 | 0.043377 | 0.079139 |
| TPK1      | 7q35       | 0.103404 | 0.043404 | 0.079181 |
| MMEL1     | 1p36.32    | -0.1034  | 0.04341  | 0.079185 |
| GRK2      | 11q13.2    | -0.10339 | 0.043435 | 0.079218 |
| CHRNA1    | 2q31.1     | 0.103388 | 0.043436 | 0.079218 |
| ERCC6L    | Xq13.1     | -0.10337 | 0.043472 | 0.079277 |
| LIN9      | 1q42.12    | 0.103366 | 0.04348  | 0.079285 |
| ACSM1     | 16p12.3    | 0.103342 | 0.04353  | 0.079368 |
| MCM3      | 6p12.2     | -0.1033  | 0.04361  | 0.079505 |
| BAIAP2L2  | 22q13.1    | -0.1033  | 0.043613 | 0.079505 |
| MGAM      | 7q34       | 0.10325  | 0.043718 | 0.079689 |
| LOC643387 | 2q37.3     | -0.10319 | 0.043848 | 0.079918 |
| KCNRG     | 13q14.2    | -0.10318 | 0.043858 | 0.07993  |
| MOAP1     | 14q32.12   | 0.103173 | 0.043877 | 0.079957 |
| C1QA      | 1p36.12    | 0.103144 | 0.043936 | 0.080057 |
| SLC25A5   | Xq24       | -0.10314 | 0.043942 | 0.08006  |
| DNAJC3    | 13q32.1    | 0.103115 | 0.043995 | 0.08015  |
| KRTAP10-4 | 21q22.3    | -0.1031  | 0.04403  | 0.080205 |
| PRPH2     | 6p21.1     | 0.103072 | 0.044084 | 0.080297 |
| AMY2B     | 1p21.1     | -0.10305 | 0.044134 | 0.080382 |
| PI4K2B    | 4p15.2     | 0.103042 | 0.044147 | 0.080397 |
| SUCLA2    | 13q14.2    | -0.10303 | 0.044172 | 0.080436 |
| FBXW8     | 12q24.22   | 0.10301  | 0.044213 | 0.080503 |
| EIF5AL1   | 10q22.3    | -0.103   | 0.044241 | 0.080547 |
| ROS1      | 6q22.1     | 0.102978 | 0.04428  | 0.080606 |
| SUPT20HL2 | Xp22.11    | 0.102977 | 0.044281 | 0.080606 |
| FAM180B   | 11p11.2    | -0.10297 | 0.044291 | 0.080616 |
| SYDE1     | 19p13.12   | 0.102954 | 0.044329 | 0.080678 |
| TMOD4     | 1q21.3     | -0.10294 | 0.044361 | 0.080729 |
| C11ORF58  | 11p15.2    | -0.10292 | 0.044407 | 0.080805 |
| USH1C     | 11p15.1    | -0.10291 | 0.044423 | 0.080827 |
| TCEA3     | 1p36.12    | 0.102873 | 0.044496 | 0.080953 |
| LGALS4    | 19q13.2    | 0.102867 | 0.04451  | 0.080971 |
| ZNF10     | 12q24.33   | -0.10286 | 0.044525 | 0.08099  |
| FAM99A    | 11p15.5    | -0.10286 | 0.044529 | 0.08099  |
| GOT1      | 10q24.2    | -0.10284 | 0.044557 | 0.081034 |
| NDUFS4    | 5q11.2     | -0.10283 | 0.044584 | 0.081076 |
| HCG27     | 6p21.33    | -0.10275 | 0.044751 | 0.081373 |
| DDX23     | 12q13.12   | 0.102734 | 0.044788 | 0.081431 |
| SYNGR1    | 22q13.1    | 0.102728 | 0.044799 | 0.081442 |
| CA14      | 1q21.2     | 0.102727 | 0.044802 | 0.081442 |

|           |                 |          |          |          |
|-----------|-----------------|----------|----------|----------|
| KLHL9     | 9p21.3          | 0.102724 | 0.044807 | 0.081445 |
| LPAR3     | 1p22.3          | 0.102721 | 0.044814 | 0.081449 |
| TRMT44    | 4p16.1          | -0.10271 | 0.044833 | 0.081477 |
| HOXC4     | 12q13.13        | 0.102699 | 0.044861 | 0.08152  |
| TAL1      | 1p33            | 0.102624 | 0.045019 | 0.081799 |
| SPAG11B   | 8p23.1          | -0.10259 | 0.04508  | 0.081903 |
| HOXB6     | 17q21.32        | 0.102587 | 0.045096 | 0.081924 |
| EMILIN3   | 20q12           | -0.10255 | 0.045171 | 0.082053 |
| MAOB      | Xp11.3          | 0.102544 | 0.045186 | 0.082073 |
| LINC00323 | 21q22.2         | 0.102526 | 0.045225 | 0.082136 |
| RHD       | 1p36.11         | -0.10252 | 0.045234 | 0.082145 |
| ADRA2B    | 2q11.2          | 0.102511 | 0.045256 | 0.082178 |
| SLC35G2   | 3q22.3          | 0.102499 | 0.045281 | 0.082216 |
| DRAXIN    | 1p36.22         | 0.102479 | 0.045324 | 0.082286 |
| SERP2     | 13q14.11        | -0.10247 | 0.045341 | 0.082309 |
| GGN       | 19q13.2         | 0.102459 | 0.045365 | 0.082347 |
| LDHD      | 16q23.1         | 0.102452 | 0.045379 | 0.082365 |
| CYB561    | 17q23.3         | -0.10245 | 0.045391 | 0.082379 |
| SERPINB7  | 18q21.33        | 0.102435 | 0.045417 | 0.082419 |
| CHGA      | 14q32.12        | 0.102428 | 0.045431 | 0.082437 |
| BET1L     | 11p15.5         | -0.10241 | 0.045478 | 0.082514 |
| IZUMO2    | 19q13.33        | -0.10234 | 0.045612 | 0.082749 |
| PLIN4     | 19p13.3         | 0.102341 | 0.045616 | 0.08275  |
| FAM118A   | 22q13.31        | -0.10231 | 0.045674 | 0.082847 |
| WDFY3-AS2 | 4q21.23         | 0.102296 | 0.045712 | 0.082908 |
| CSDC2     | 22q13.2         | 0.102267 | 0.045773 | 0.083011 |
| PLPPR1    | 9q31.1          | 0.10224  | 0.04583  | 0.083108 |
| CCDC106   | 19q13.42        | -0.10224 | 0.045836 | 0.083111 |
| PIGW      | 17q12           | -0.10222 | 0.045868 | 0.083162 |
| PRPF18    | 10p13           | 0.10221  | 0.045896 | 0.083204 |
| SLC39A11  | 17q24.3-q25.1   | -0.1022  | 0.045907 | 0.083217 |
| DLG3      | Xq13.1          | 0.102164 | 0.045994 | 0.083366 |
| RNF31     | 14q12           | 0.102155 | 0.046012 | 0.083387 |
| ZKSCAN5   | 7q22.1          | 0.102154 | 0.046013 | 0.083387 |
| STXBP2    | 19p13.2         | -0.10215 | 0.046029 | 0.083407 |
| UTP20     | 12q23.2         | 0.102144 | 0.046036 | 0.083413 |
| SH3BGR    | 21q22.2         | -0.10206 | 0.046214 | 0.083728 |
| DGCR9     | 22q11.21        | 0.102057 | 0.046223 | 0.083736 |
| TAS1R2    | 1p36.13         | 0.102054 | 0.046229 | 0.083739 |
| PRPF40A   | 2q23.3          | 0.102004 | 0.046336 | 0.083925 |
| TRPC3     | 4q27            | 0.101991 | 0.046364 | 0.083969 |
| TSC22D1   | 13q14.11        | -0.10198 | 0.046393 | 0.084007 |
| ARHGEF35  | 7q35            | 0.101978 | 0.046394 | 0.084007 |
| GPATCH2   | 1q41            | 0.101975 | 0.046398 | 0.084008 |
| MARK3     | 14q32.32-q32.33 | 0.101952 | 0.046449 | 0.084092 |
| BMERB1    | 16p13.11        | 0.101947 | 0.04646  | 0.084106 |
| AP1S3     | 2q36.1          | 0.101942 | 0.04647  | 0.084115 |
| RIMS2     | 8q22.3          | 0.101914 | 0.046531 | 0.084218 |
| LINC01588 | 14q21.3         | 0.101911 | 0.046536 | 0.08422  |
| CCDC184   | 12q13.11        | 0.101899 | 0.046563 | 0.08426  |
| LRRC26    | 9q34.3          | 0.10189  | 0.046583 | 0.084287 |
| SHTN1     | 10q25.3         | 0.101888 | 0.046586 | 0.084287 |
| TNFSF11   | 13q14.11        | 0.101884 | 0.046595 | 0.084296 |
| SNORA62   | 3p22.1          | -0.10188 | 0.046599 | 0.084296 |
| NIPSNAP2  | 7p11.2          | -0.10186 | 0.046646 | 0.084374 |
| ADAM33    | 20p13           | 0.101808 | 0.046759 | 0.08457  |
| ISY1      | 3q21.3          | -0.10181 | 0.046764 | 0.084571 |
| SLC34A1   | 5q35.3          | -0.10179 | 0.046789 | 0.084608 |

|           |                |          |          |          |
|-----------|----------------|----------|----------|----------|
| RASA3     | 13q34          | 0.101791 | 0.046797 | 0.084615 |
| UIMC1     | 5q35.2         | -0.10177 | 0.046844 | 0.084694 |
| SERPINB2  | 18q21.33-q22.1 | 0.101718 | 0.046955 | 0.084886 |
| GPRIN2    | 10q11.22       | 0.101699 | 0.046997 | 0.084954 |
| UBA7      | 3p21.31        | 0.101688 | 0.04702  | 0.084988 |
| OGA       | 10q24.32       | 0.101679 | 0.047041 | 0.085019 |
| FGFR1OP   | 6q27           | -0.10168 | 0.047045 | 0.085019 |
| IL27      | 16p12.1-p11.2  | -0.10167 | 0.047055 | 0.085028 |
| ZNF542P   | 19q13.43       | 0.101667 | 0.047068 | 0.085044 |
| AOC4P     | 17q21.31       | 0.101662 | 0.047077 | 0.085053 |
| GGPS1     | 1q42.3         | 0.101627 | 0.047153 | 0.085183 |
| LMOD3     | 3p14.1         | -0.10162 | 0.047161 | 0.08519  |
| TPRG1L    | 1p36.32        | -0.1016  | 0.04722  | 0.085288 |
| ZCCHC18   | Xq22.2         | 0.101591 | 0.047232 | 0.085302 |
| APOBEC3D  | 22q13.1        | 0.101585 | 0.047246 | 0.08532  |
| C9        | 5p13.1         | 0.101562 | 0.047296 | 0.085403 |
| MZF1      | 19q13.43       | -0.10154 | 0.047347 | 0.085487 |
| CDH26     | 20q13.33       | -0.10152 | 0.047397 | 0.08557  |
| IPPK      | 9q22.31        | -0.10148 | 0.047479 | 0.08571  |
| ENPP7     | 17q25.3        | -0.10147 | 0.0475   | 0.085735 |
| ABCA7     | 19p13.3        | 0.101468 | 0.047502 | 0.085735 |
| GOSR2     | 17q21.32       | -0.10144 | 0.047555 | 0.08582  |
| ZPLD1     | 3q12.3         | 0.101443 | 0.047557 | 0.08582  |
| RAB6D     | 2q21.1         | 0.101431 | 0.047584 | 0.085861 |
| HIST2H4A  | 1q21.2         | -0.10141 | 0.04763  | 0.085935 |
| PKIA      | 8q21.13        | 0.101399 | 0.047654 | 0.085971 |
| GBP6      | 1p22.2         | 0.101386 | 0.047683 | 0.086016 |
| GSTM3     | 1p13.3         | -0.10138 | 0.047688 | 0.086016 |
| ZC3H7B    | 22q13.2        | 0.101382 | 0.047692 | 0.086016 |
| KPNA4     | 3q25.33        | 0.101324 | 0.047819 | 0.086238 |
| PCDHAC2   | 5q31.3         | 0.101316 | 0.047838 | 0.086265 |
| SLC6A9    | 1p34.1         | -0.10129 | 0.047901 | 0.08637  |
| XKR6      | 8p23.1         | 0.101277 | 0.047925 | 0.086406 |
| ANGEL2    | 1q32.3         | 0.101271 | 0.047936 | 0.086418 |
| GGT5      | 22q11.23       | 0.101242 | 0.048002 | 0.086528 |
| ARHGEF10L | 1p36.13        | -0.10123 | 0.048022 | 0.086558 |
| COPS7A    | 12p13.31       | -0.10123 | 0.048033 | 0.086569 |
| HLA-DQB1  | 6p21.32        | 0.101208 | 0.048076 | 0.086639 |
| TBC1D10B  | 16p11.2        | -0.10116 | 0.048175 | 0.08681  |
| LARS      | 5q32           | -0.10115 | 0.048201 | 0.086849 |
| NUCB2     | 11p15.1        | 0.10107  | 0.048385 | 0.087161 |
| ZSCAN10   | 16p13.3        | -0.10107 | 0.048387 | 0.087161 |
| S100A6    | 1q21.3         | -0.10107 | 0.048387 | 0.087161 |
| ZSCAN32   | 16p13.3        | -0.10105 | 0.048424 | 0.087219 |
| TLE5      | 19p13.3        | -0.10103 | 0.04848  | 0.087311 |
| THAP7-AS1 | 22q11.21       | -0.10102 | 0.048505 | 0.087349 |
| SCAND2P   | 15q25.2        | 0.101003 | 0.048534 | 0.087387 |
| PPIG      | 2q31.1         | 0.101003 | 0.048535 | 0.087387 |
| LAMP5     | 20p12.2        | 0.100977 | 0.048592 | 0.087483 |
| MRFAP1    | 4p16.1         | -0.10096 | 0.048627 | 0.087531 |
| C4ORF46   | 4q32.1         | -0.10096 | 0.048628 | 0.087531 |
| HPF1      | 4q33           | -0.10096 | 0.04864  | 0.08754  |
| RBP5      | 12p13.31       | 0.100955 | 0.048642 | 0.08754  |
| ABCB5     | 7p21.1         | 0.100944 | 0.048665 | 0.087575 |
| TXLNB     | 6q24.1         | 0.100925 | 0.04871  | 0.087647 |
| HLA-DRB5  | 6p21.32        | 0.100922 | 0.048715 | 0.087649 |
| TICRR     | 15q26.1        | 0.10089  | 0.048787 | 0.087768 |
| ADRA2C    | 4p16.3         | -0.10089 | 0.04879  | 0.087768 |

|           |              |          |          |          |
|-----------|--------------|----------|----------|----------|
| PICRAR    | 21q22.3      | -0.10087 | 0.048837 | 0.087844 |
| SOX15     | 17p13.1      | 0.100839 | 0.048901 | 0.087952 |
| ENAH      | 1q42.12      | 0.100837 | 0.048907 | 0.087955 |
| CREBZF    | 11q14.1      | -0.10082 | 0.048947 | 0.088018 |
| CYP11B2   | 8q24.3       | -0.10081 | 0.048974 | 0.088058 |
| PLEKHF2   | 8q22.1       | 0.100805 | 0.048979 | 0.088059 |
| CCDC144NL | 17p11.2      | 0.100786 | 0.049022 | 0.088129 |
| COL6A6    | 3q22.1       | 0.100764 | 0.049072 | 0.088211 |
| GTF2H2B   | 5q13.2       | -0.10076 | 0.049076 | 0.088211 |
| HPS1      | 10q24.2      | -0.10075 | 0.049108 | 0.08826  |
| SPOCK3    | 4q32.3       | 0.100733 | 0.04914  | 0.088311 |
| BET1P1    | 7q36.1       | -0.10072 | 0.049172 | 0.08836  |
| FAM20C    | 7p22.3       | 0.100691 | 0.049235 | 0.088466 |
| ATP1B2    | 17p13.1      | 0.100665 | 0.049295 | 0.088564 |
| XRCC6     | 22q13.2      | -0.10066 | 0.049299 | 0.088564 |
| RGS11     | 16p13.3      | 0.100659 | 0.049309 | 0.088574 |
| CHRNA4    | 20q13.33     | -0.10065 | 0.049339 | 0.088611 |
| CCDC93    | 2q14.1       | 0.100645 | 0.049341 | 0.088611 |
| SLC44A1   | 9q31.1-q31.2 | 0.100643 | 0.049346 | 0.088611 |
| SH3RF2    | 5q32         | 0.100642 | 0.049347 | 0.088611 |
| HNRNPD    | 4q21.22      | -0.10064 | 0.049355 | 0.088616 |
| KLK8      | 19q13.41     | -0.10059 | 0.04947  | 0.088815 |
| KRTAP4-7  | 17q21.2      | -0.10058 | 0.04949  | 0.088843 |
| VRK2      | 2p16.1       | 0.100556 | 0.049543 | 0.088931 |
| KCNJ9     | 1q23.2       | 0.100528 | 0.049607 | 0.089038 |
| MAP7D3    | Xq26.3       | 0.100511 | 0.049646 | 0.08909  |
| TUBBP5    | 9q34.3       | 0.100511 | 0.049647 | 0.08909  |
| XKRY2     | Yq11.222     | -0.10051 | 0.04965  | 0.08909  |
| CGRRF1    | 14q22.2      | 0.100503 | 0.049664 | 0.089108 |
| ALMS1P1   | 2p13.1       | -0.10045 | 0.049796 | 0.089337 |
| SLC44A5   | 1p31.1       | -0.10044 | 0.049808 | 0.08935  |
| KLHL15    | Xp22.11      | 0.100428 | 0.049835 | 0.08939  |
| PSPN      | 19p13.3      | -0.10042 | 0.04985  | 0.089409 |
| TMEM43    | 3p25.1       | 0.100418 | 0.049857 | 0.089414 |
| KLC3      | 19q13.32     | -0.10042 | 0.049864 | 0.089418 |
| DIRAS3    | 1p31.3       | 0.100409 | 0.049879 | 0.089437 |
| KRT1      | 12q13.13     | 0.100404 | 0.049891 | 0.08945  |
| RILPL1    | 12q24.31     | -0.10038 | 0.049941 | 0.089532 |
| STARD7    | 2q11.2       | -0.10036 | 0.049992 | 0.089615 |
| OSTN      | 3q28         | 0.100341 | 0.050035 | 0.089685 |
| RELL1     | 4p14         | 0.100332 | 0.050055 | 0.089714 |
| PHTF1     | 1p13.2       | 0.1003   | 0.05013  | 0.089837 |
| SNORA14B  | 1q42.3       | -0.1003  | 0.050133 | 0.089837 |
| PPP2R1B   | 11q23.1      | 0.100282 | 0.050171 | 0.089896 |
| PTGES3    | 12q13.3 12   | -0.10028 | 0.050182 | 0.089908 |
| CLCN6     | 1p36.22      | -0.10023 | 0.050287 | 0.090089 |
| RNASE12   | 14q11.2      | -0.10022 | 0.05031  | 0.090122 |
| ARPP21    | 3p22.3       | 0.10021  | 0.050337 | 0.090162 |
| CGAS      | 6q13         | 0.100191 | 0.050381 | 0.090227 |
| PPP6R2    | 22q13.33     | -0.10019 | 0.050383 | 0.090227 |
| EXD3      | 9q34.3       | -0.10015 | 0.050483 | 0.090398 |
| PPP1R13L  | 19q13.32     | 0.100113 | 0.050561 | 0.090527 |
| CLGN      | 4q31.1       | -0.10011 | 0.050564 | 0.090527 |
| ISYNA1    | 19p13.11     | -0.10009 | 0.050614 | 0.090609 |
| HERC2P2   | 15q11.2      | -0.10007 | 0.050668 | 0.090698 |
| TESMIN    | 11q13.3      | -0.10001 | 0.050795 | 0.090911 |
| THAP12    | 11q13.5      | -0.10001 | 0.050796 | 0.090911 |
| INPP5D    | 2q37.1       | 0.1      | 0.050824 | 0.090952 |

|               |               |          |          |          |
|---------------|---------------|----------|----------|----------|
| CFD           | 19p13.3       | 0.09998  | 0.05087  | 0.091027 |
| ABHD11-AS1    | 7q11.23       | -0.09997 | 0.050895 | 0.091064 |
| ILRUN         | 6p21.31       | 0.099963 | 0.05091  | 0.091082 |
| DNAJC5G       | 2p23.3        | -0.09994 | 0.050969 | 0.09118  |
| DAP           | 5p15.2        | 0.099911 | 0.05103  | 0.09128  |
| MMP13         | 11q22.2       | 0.09989  | 0.05108  | 0.091362 |
| PAQR9         | 3q23          | -0.09988 | 0.051111 | 0.09141  |
| LRIT3         | 4q25          | -0.09987 | 0.051126 | 0.091428 |
| OR5AN1        | 11q12.1       | 0.099859 | 0.051151 | 0.091459 |
| CDH1          | 16q22.1       | 0.099859 | 0.051152 | 0.091459 |
| GSX1          | 13q12.2       | -0.09983 | 0.051228 | 0.091585 |
| MAPT-IT1      | 17q21.31      | -0.09981 | 0.051255 | 0.091621 |
| LINC02716     | 11p11.2       | 0.099814 | 0.051257 | 0.091621 |
| DNAH3         | 16p12.3       | 0.09981  | 0.051266 | 0.09163  |
| ZNF93         | 19p12         | -0.0998  | 0.051301 | 0.091684 |
| STON1-GTF2A1L | 2p16.3        | 0.099786 | 0.051322 | 0.091712 |
| OR1F1         | 16p13.3       | 0.099778 | 0.051342 | 0.091741 |
| KRTAP10-1     | 21q22.3       | -0.09977 | 0.051367 | 0.091777 |
| CYB561D2      | 3p21.31       | -0.09975 | 0.051396 | 0.09182  |
| PALD1         | 10q22.1       | -0.09974 | 0.051441 | 0.091893 |
| SLC6A17       | 1p13.3        | 0.099732 | 0.05145  | 0.0919   |
| HMG1N1        | 21q22.2       | -0.09971 | 0.051491 | 0.091965 |
| ESR2          | 14q23.2-q23.3 | 0.099709 | 0.051503 | 0.091979 |
| MAGEA5        | Xq28          | -0.09965 | 0.05164  | 0.092207 |
| TOPBP1        | 3q22.1        | 0.099651 | 0.05164  | 0.092207 |
| MIS18A        | 21q22.11      | -0.09964 | 0.05166  | 0.092235 |
| C5ORF58       | 5q35.1        | 0.099613 | 0.051729 | 0.09235  |
| CDS2          | 20p12.3       | 0.09959  | 0.051783 | 0.092439 |
| CEP41         | 7q32.2        | -0.09959 | 0.051791 | 0.092443 |
| C14ORF28      | 14q21.2       | 0.099566 | 0.05184  | 0.092524 |
| HK3           | 5q35.2        | 0.099508 | 0.051979 | 0.092762 |
| PSG7          | 19q13.31      | -0.0995  | 0.05199  | 0.092774 |
| PDK2          | 17q21.33      | -0.09949 | 0.052014 | 0.092809 |
| TDRD5         | 1q25.2        | 0.099482 | 0.052038 | 0.092844 |
| ANKHD1        | 5q31.3        | 0.099463 | 0.052084 | 0.092917 |
| CCR6          | 6q27          | 0.099452 | 0.052111 | 0.092948 |
| CCDC191       | 3q13.31       | -0.09945 | 0.052114 | 0.092948 |
| AKAP14        | Xq24          | -0.09945 | 0.052115 | 0.092948 |
| ZNF80         | 3q13.31       | 0.099447 | 0.052123 | 0.092953 |
| RAPSN         | 11p11.2       | -0.09942 | 0.05219  | 0.093064 |
| NRL           | 14q11.2-q12   | -0.0994  | 0.052229 | 0.093126 |
| HIST2H2AA3    | 1q21.2        | -0.09939 | 0.052252 | 0.093159 |
| PIP5K1B       | 9q21.11       | 0.099378 | 0.052287 | 0.093214 |
| FDCSP         | 4q13.3 4q13   | 0.09934  | 0.052377 | 0.093364 |
| SUSD2         | 22q11.23      | 0.099322 | 0.05242  | 0.093434 |
| RNU6ATAC      | 9q34.2        | -0.09931 | 0.052444 | 0.093468 |
| OR2H2         | 6p22.1        | -0.09931 | 0.052451 | 0.093471 |
| PCSK1N        | Xp11.23       | -0.09927 | 0.052538 | 0.093609 |
| AKR1B10       | 7q33          | 0.099272 | 0.05254  | 0.093609 |
| FAM49B        | 8q24.21       | -0.09927 | 0.052542 | 0.093609 |
| ARL14EP       | 11p14.1       | -0.09927 | 0.052549 | 0.093613 |
| CC2D1A        | 19p13.12      | -0.09927 | 0.052556 | 0.093618 |
| MYRF          | 11q12.2       | 0.099258 | 0.052574 | 0.093641 |
| TSPAN32       | 11p15.5       | 0.099224 | 0.052655 | 0.093769 |
| NCR1          | 19q13.42      | 0.099224 | 0.052655 | 0.093769 |
| ACSS2         | 20q11.22      | -0.09922 | 0.052667 | 0.093781 |
| SULF2         | 20q13.12      | 0.099212 | 0.052684 | 0.093804 |
| BTBD17        | 17q25.1       | 0.099199 | 0.052715 | 0.09385  |

|           |              |          |          |          |
|-----------|--------------|----------|----------|----------|
| TNFAIP3   | 6q23.3       | 0.099196 | 0.052721 | 0.093852 |
| CUBN      | 10p13        | 0.099178 | 0.052764 | 0.093921 |
| C17ORF98  | 17q12        | -0.09916 | 0.052797 | 0.093959 |
| LIG3      | 17q12        | -0.09916 | 0.052799 | 0.093959 |
| OSBPL5    | 11p15.4      | 0.099163 | 0.0528   | 0.093959 |
| HIST1H2BF | 6p22.2       | -0.09916 | 0.052807 | 0.093964 |
| PEA15     | 1q23.2       | 0.099152 | 0.052827 | 0.093991 |
| SYTL4     | Xq22.1       | 0.099144 | 0.052846 | 0.094016 |
| OR51T1    | 11p15.4      | 0.099142 | 0.05285  | 0.094016 |
| OR2T33    | 1q44         | 0.099109 | 0.052931 | 0.09415  |
| MOG       | 6p22.1       | 0.09908  | 0.053001 | 0.094267 |
| NINL      | 20p11.21     | -0.09903 | 0.053126 | 0.094478 |
| UBA5      | 3q22.1       | 0.099027 | 0.053129 | 0.094478 |
| C11ORF52  | 11q23.1      | -0.09902 | 0.053151 | 0.094508 |
| KIF21B    | 1q32.1       | 0.098992 | 0.053213 | 0.094611 |
| HIST1H3A  | 6p22.2       | -0.09897 | 0.05326  | 0.094686 |
| RNF216    | 7p22.1       | -0.09896 | 0.053281 | 0.094714 |
| PDZD4     | Xq28         | 0.098951 | 0.053312 | 0.094763 |
| PENK      | 8q12.1       | 0.098922 | 0.053381 | 0.094876 |
| BAG2      | 6p12.1       | -0.09891 | 0.053411 | 0.094913 |
| DRD1      | 5q35.2       | 0.09891  | 0.053411 | 0.094913 |
| DUOXA2    | 15q21.1      | 0.098891 | 0.053456 | 0.094984 |
| BTN3A2    | 6p22.2       | 0.098867 | 0.053517 | 0.095083 |
| CARD18    | 11q22.3      | 0.098862 | 0.053527 | 0.095093 |
| XPO6      | 16p12.1      | -0.09884 | 0.053577 | 0.095174 |
| PCDHGC3   | 5q31.3       | 0.098816 | 0.05364  | 0.095276 |
| CACNA2D3  | 3p21.1-p14.3 | 0.098776 | 0.053736 | 0.095439 |
| KRTAP10-7 | 21q22.3      | -0.09873 | 0.053853 | 0.095639 |
| PLPP7     | 9q34.13      | 0.098693 | 0.05394  | 0.095785 |
| ALG1L     | 3q21.2       | -0.09869 | 0.053948 | 0.09579  |
| MTMR14    | 3p25.3       | -0.09868 | 0.053961 | 0.095804 |
| GLIPR1L1  | 12q21.2      | -0.09865 | 0.054035 | 0.095927 |
| FBLL1     | 5q34         | -0.09862 | 0.054123 | 0.096076 |
| JDP2      | 14q24.3      | 0.098605 | 0.054155 | 0.096119 |
| S1PR2     | 19p13.2      | 0.098604 | 0.054157 | 0.096119 |
| CXCR2P1   | 2q35         | 0.098594 | 0.054183 | 0.096156 |
| ZNF398    | 7q36.1       | 0.098585 | 0.054205 | 0.096187 |
| GDPD2     | Xq13.1       | 0.098538 | 0.05432  | 0.096382 |
| CLN3      | 16p12.1      | -0.09853 | 0.054337 | 0.096404 |
| BIN3      | 8p21.3       | -0.0985  | 0.054405 | 0.096516 |
| BCO2      | 11q23.1      | -0.0985  | 0.05442  | 0.096534 |
| BEX3      | Xq22.2       | 0.098479 | 0.054465 | 0.096606 |
| ELOVL1    | 1p34.2       | -0.09846 | 0.054516 | 0.096682 |
| CIB1      | 15q26.1      | 0.098456 | 0.054521 | 0.096682 |
| TRMT13    | 1p21.2       | -0.09846 | 0.054523 | 0.096682 |
| ZNF260    | 19q13.12     | 0.098427 | 0.054592 | 0.096796 |
| CT62      | 15q23        | 0.098351 | 0.054779 | 0.09712  |
| ACTL7A    | 9q31.3       | 0.098303 | 0.054901 | 0.097326 |
| TCTE1     | 6p21.1       | 0.098295 | 0.054919 | 0.09735  |
| MSTO1     | 1q22         | -0.09829 | 0.054924 | 0.09735  |
| CCDC66    | 3p14.3       | -0.09825 | 0.05502  | 0.097512 |
| ASB5      | 4q34.2       | 0.098213 | 0.055123 | 0.097685 |
| VEGFA     | 6p21.1       | -0.09819 | 0.055169 | 0.097758 |
| RFX4      | 12q23.3      | 0.098188 | 0.055186 | 0.09778  |
| GLRA1     | 5q33.1       | 0.098177 | 0.055213 | 0.09782  |
| PTGDS     | 9q34.3       | 0.098174 | 0.055221 | 0.097826 |
| PURG      | 8p12         | 0.098167 | 0.055237 | 0.097833 |
| CPNE2     | 16q13        | 0.098166 | 0.05524  | 0.097833 |

|           |          |          |          |          |
|-----------|----------|----------|----------|----------|
| DPT       | 1q24.2   | 0.098166 | 0.05524  | 0.097833 |
| LTK       | 15q15.1  | 0.098103 | 0.055398 | 0.098103 |
| PLAG1     | 8q12.1   | -0.0981  | 0.055409 | 0.098114 |
| LNX1      | 4q12     | 0.098093 | 0.055423 | 0.09813  |
| RORC      | 1q21.3   | 0.098065 | 0.055493 | 0.098247 |
| OSTC      | 4q25     | -0.09806 | 0.055499 | 0.098248 |
| CAV3      | 3p25.3   | 0.098044 | 0.055546 | 0.098323 |
| FDXACB1   | 11q23.1  | -0.09803 | 0.055575 | 0.098365 |
| CD46      | 1q32.2   | 0.098017 | 0.055613 | 0.098423 |
| TMEFF1    | 9q31.1   | 0.098006 | 0.05564  | 0.098463 |
| FAM189B   | 1q22     | -0.09799 | 0.055678 | 0.098522 |
| WDR36     | 5q22.1   | 0.097987 | 0.055688 | 0.098531 |
| AKAP8     | 19p13.12 | -0.09798 | 0.055717 | 0.098572 |
| LRRN4CL   | 11q12.3  | 0.097957 | 0.055762 | 0.098639 |
| CCDC96    | 4p16.1   | 0.097957 | 0.055764 | 0.098639 |
| LINC01018 | 5p15.31  | 0.09795  | 0.05578  | 0.098658 |
| HCG9      | 6p22.1   | -0.09792 | 0.055866 | 0.098802 |
| KRTAP5-4  | 11p15.5  | -0.09791 | 0.055873 | 0.098805 |
| SMARCC2   | 12q13.2  | 0.097902 | 0.055901 | 0.098846 |
| NXPH1     | 7p21.3   | -0.09789 | 0.055922 | 0.098874 |
| SPRR3     | 1q21.3   | 0.097891 | 0.05593  | 0.09888  |
| CEP89     | 19q13.11 | -0.09788 | 0.055946 | 0.0989   |
| LGALS2    | 22q13.1  | 0.097853 | 0.056025 | 0.09903  |
| SLC15A4   | 12q24.33 | 0.09785  | 0.056033 | 0.099036 |
| APLP2     | 11q24.3  | 0.097838 | 0.056064 | 0.099078 |
| DAW1      | 2q36.3   | -0.09784 | 0.056067 | 0.099078 |
| ZNF280C   | Xq26.1   | -0.09782 | 0.056097 | 0.099122 |
| RP1L1     | 8p23.1   | 0.097798 | 0.056164 | 0.099232 |
| ZFP14     | 19q13.12 | 0.097792 | 0.056179 | 0.099251 |
| STAG2     | Xq25     | 0.097783 | 0.056203 | 0.099276 |
| UPK1A     | 19q13.12 | -0.09778 | 0.056204 | 0.099276 |
| CCDC138   | 2q13     | -0.09776 | 0.05626  | 0.099366 |
| CTLA4     | 2q33.2   | 0.097751 | 0.056283 | 0.099399 |
| FAM205A   | 9p13.3   | 0.097743 | 0.056303 | 0.099419 |
| ITGAD     | 16p11.2  | 0.097743 | 0.056304 | 0.099419 |
| TP53I3    | 2p23.3   | 0.097735 | 0.056324 | 0.099444 |
| FSCN3     | 7q32.1   | -0.09772 | 0.056351 | 0.099483 |
| PTX4      | 16p13.3  | 0.097713 | 0.05638  | 0.099526 |
| SRC       | 20q11.23 | -0.0977  | 0.056414 | 0.099578 |
| SYT13     | 11p11.2  | 0.097687 | 0.056446 | 0.09962  |
| GYPE      | 4q31.21  | 0.097686 | 0.056448 | 0.09962  |
| PARPBP    | 12q23.2  | -0.09766 | 0.056506 | 0.099713 |
| IRS2      | 13q34    | 0.097646 | 0.056548 | 0.099779 |
| METTL15   | 11p14.1  | 0.097629 | 0.056593 | 0.099849 |
| CLEC2D    | 12p13.31 | -0.09761 | 0.056649 | 0.099938 |
| TXNRD1    | 12q23.3  | 0.097584 | 0.056708 | 0.100034 |
| IL26      | 12q15    | -0.09756 | 0.056756 | 0.10011  |
| IP6K1     | 3p21.31  | 0.097557 | 0.056775 | 0.100136 |
| NUTM2A    | 10q23.2  | 0.097547 | 0.056802 | 0.100173 |
| THNSL1    | 10p12.1  | -0.09753 | 0.056854 | 0.100257 |
| GCLC      | 6p12.1   | -0.09752 | 0.056859 | 0.100257 |
| TRAM1L1   | 4q26     | 0.097486 | 0.056958 | 0.100423 |
| KRT75     | 12q13.13 | -0.09747 | 0.056995 | 0.100479 |
| SRXN1     | 20p13    | -0.09746 | 0.057019 | 0.100513 |
| TRMT2B    | Xq22.1   | -0.09744 | 0.05708  | 0.10061  |
| AACS      | 12q24.31 | 0.097428 | 0.057106 | 0.100648 |
| HIST1H4A  | 6p22.2   | -0.0974  | 0.057171 | 0.100754 |
| CDK11B    | 1p36.33  | -0.09738 | 0.057232 | 0.100852 |

|           |                    |          |          |          |
|-----------|--------------------|----------|----------|----------|
| FAIM2     | 12q13.12           | 0.097328 | 0.057362 | 0.101072 |
| CERCAM    | 9q34.11            | 0.097313 | 0.057401 | 0.101133 |
| HDHD2     | 18q21.1            | 0.097311 | 0.057407 | 0.101134 |
| CDH12     | 5p14.3             | -0.09729 | 0.057463 | 0.101223 |
| ADCY4     | 14q12              | 0.097274 | 0.057502 | 0.101277 |
| WFDC11    | 20q13.12           | -0.09727 | 0.057503 | 0.101277 |
| LIN7C     | 11p14.1            | -0.09727 | 0.057514 | 0.101286 |
| ELF1      | 13q14.11           | 0.097267 | 0.057519 | 0.101286 |
| CLUAP1    | 16p13.3            | -0.09726 | 0.057544 | 0.101319 |
| HSPB3     | 5q11.2             | -0.09726 | 0.057547 | 0.101319 |
| GABRG2    | 5q34               | 0.097252 | 0.057558 | 0.101328 |
| CCDC50    | 3q28               | 0.097239 | 0.057591 | 0.101378 |
| RND2      | 17q21.31           | -0.09723 | 0.057621 | 0.101422 |
| ADAM22    | 7q21.12            | 0.097214 | 0.057657 | 0.101476 |
| EFCAB11   | 14q32.11           | -0.0972  | 0.057687 | 0.10152  |
| CXCL13    | 4q21.1             | 0.0972   | 0.057693 | 0.101522 |
| TRPV3     | 17p13.2            | 0.097189 | 0.057721 | 0.101561 |
| PRSS48    | 4q31.3             | 0.097182 | 0.057738 | 0.101583 |
| SOCS1     | 16p13.13           | -0.09716 | 0.05779  | 0.101665 |
| WDPCP     | 2p15               | 0.097151 | 0.05782  | 0.10171  |
| HDAC5     | 17q21.31           | -0.09715 | 0.05783  | 0.101719 |
| SLC35F2   | 11q22.3            | -0.09713 | 0.057883 | 0.101803 |
| GPR161    | 1q24.2             | 0.097111 | 0.057922 | 0.101854 |
| CCDC122   | 13q14.11           | -0.09711 | 0.057922 | 0.101854 |
| MATN3     | 2p24.1             | 0.097105 | 0.057937 | 0.101871 |
| THBS3     | 1q22               | 0.097091 | 0.057976 | 0.10193  |
| RHOV      | 15q15.1            | 0.097062 | 0.058051 | 0.102053 |
| PDLIM3    | 4q35.1             | 0.097035 | 0.058119 | 0.102164 |
| PITPNC1   | 17q24.2            | 0.097027 | 0.05814  | 0.102192 |
| IARS      | 9q22.31            | -0.09702 | 0.058154 | 0.102207 |
| KIAA1147  | 7q34               | 0.097017 | 0.058167 | 0.10222  |
| SYT2      | 1q32.1             | 0.097013 | 0.058176 | 0.102228 |
| CAMK1     | 3p25.3             | -0.09699 | 0.058229 | 0.102313 |
| EPHA5     | 4q13.1-q13.2       | 0.096985 | 0.058251 | 0.102341 |
| MIR600HG  | 9q33.3             | -0.09698 | 0.058266 | 0.10236  |
| RTL3      | Xq21.1             | 0.096964 | 0.058306 | 0.10242  |
| C4ORF3    | 4q26               | 0.096947 | 0.05835  | 0.102488 |
| SLC6A19   | 5p15.33            | 0.096923 | 0.058411 | 0.102586 |
| ACADVL    | 17p13.1            | -0.09692 | 0.058416 | 0.102586 |
| CGB1      | 19q13.33           | -0.0969  | 0.058476 | 0.102682 |
| STAU2     | 8q21.11            | 0.096857 | 0.058584 | 0.102863 |
| RAMP2-AS1 | 17q21.2            | -0.09684 | 0.058635 | 0.102931 |
| GEMIN4    | 17p13.3            | 0.096837 | 0.058636 | 0.102931 |
| CLDN17    | 21q21.3            | 0.096837 | 0.058638 | 0.102931 |
| CACNA1B   | 9q34.3             | 0.096814 | 0.058698 | 0.103028 |
| QTRT2     | 3q13.31            | 0.09681  | 0.058709 | 0.103029 |
| DNM1      | 9q34.11            | -0.09681 | 0.058709 | 0.103029 |
| ZNF557    | 19p13.2            | 0.096799 | 0.058737 | 0.103069 |
| DNAJC5B   | 8q13.1             | 0.096787 | 0.058767 | 0.103113 |
| PAQR4     | 16p13.3            | -0.09678 | 0.058779 | 0.103125 |
| SNX11     | 17q21.32           | -0.09678 | 0.058787 | 0.103129 |
| ADAM5     | 8p11.22            | -0.09674 | 0.058897 | 0.103314 |
| FARP1     | 13q32.2            | -0.09673 | 0.058905 | 0.103319 |
| KHSRP     | 19p13.3            | -0.09673 | 0.058924 | 0.103343 |
| DDHD1     | 14q22.1            | 0.096702 | 0.058992 | 0.103453 |
| CD99      | Xp22.33 and Yp11.2 | -0.09669 | 0.059023 | 0.103498 |
| GNRHR     | 4q13.2             | 0.096687 | 0.059031 | 0.103503 |
| MRPL3     | 3q22.1             | -0.09667 | 0.059077 | 0.103575 |



|           |               |          |          |          |
|-----------|---------------|----------|----------|----------|
| PRR32     | Xq25          | -0.09666 | 0.059104 | 0.103614 |
| ABHD8     | 19p13.11      | -0.09664 | 0.059146 | 0.103678 |
| SPAST     | 2p22.3        | 0.096607 | 0.059241 | 0.103836 |
| NPHS2     | 1q25.2        | 0.096567 | 0.059349 | 0.104015 |
| USP20     | 9q34.11       | -0.09656 | 0.059357 | 0.104021 |
| C21ORF62  | 21q22.11      | 0.096548 | 0.059397 | 0.104078 |
| KLHDC2    | 14q21.3       | 0.096547 | 0.0594   | 0.104078 |
| C1ORF21   | 1q25.3        | 0.096544 | 0.059408 | 0.104083 |
| NOTCH1    | 9q34.3        | 0.096531 | 0.059442 | 0.104133 |
| LINC01126 | 2p21          | -0.09651 | 0.059493 | 0.104214 |
| CELF6     | 15q23         | 0.096488 | 0.059556 | 0.10431  |
| GATA5     | 20q13.33      | -0.09649 | 0.059559 | 0.10431  |
| KIF3A     | 5q31.1        | 0.096482 | 0.059572 | 0.104324 |
| CPA6      | 8q13.2        | 0.096468 | 0.059611 | 0.104383 |
| SNURF     | 15q11.2       | 0.096461 | 0.05963  | 0.104407 |
| SHLD2P1   | 10q11.22      | 0.096436 | 0.059695 | 0.104512 |
| TMEM114   | 16p13.2       | -0.09642 | 0.05974  | 0.104582 |
| RNPEP     | 1q32.1        | 0.096415 | 0.05975  | 0.104591 |
| CTBP2     | 10q26.13      | 0.096286 | 0.060094 | 0.105174 |
| SLC7A3    | Xq13.1        | 0.096286 | 0.060094 | 0.105174 |
| FAT2      | 5q33.1        | 0.096282 | 0.060105 | 0.105184 |
| RHO       | 3q22.1        | 0.096219 | 0.060275 | 0.105473 |
| ZNF684    | 1p34.2        | -0.09621 | 0.060304 | 0.105513 |
| CDCA2     | 8p21.2        | 0.096184 | 0.060369 | 0.105616 |
| CLEC4M    | 19p13.2       | 0.096182 | 0.060373 | 0.105616 |
| TTLL6     | 17q21.32      | 0.096162 | 0.060427 | 0.1057   |
| BICDL1    | 12q24.23      | -0.09615 | 0.060454 | 0.10574  |
| AEBP2     | 12p12.3       | 0.096143 | 0.060477 | 0.105771 |
| CTAGE9    | 6q23.2        | 0.096141 | 0.060485 | 0.105775 |
| PSMA8     | 18q11.2       | 0.096136 | 0.060498 | 0.105788 |
| NRXN3     | 14q24.3-q31.1 | 0.096127 | 0.060521 | 0.105819 |
| GLTP      | 12q24.11      | 0.096123 | 0.060532 | 0.10583  |
| ALDH8A1   | 6q23.3        | -0.09609 | 0.060611 | 0.105959 |
| NHEJ1     | 2q35          | -0.09607 | 0.060666 | 0.106044 |
| SLC7A5P2  | 16p12.2       | -0.09607 | 0.060685 | 0.106069 |
| DYRK3     | 1q32.1        | 0.09605  | 0.060729 | 0.106136 |
| CFP       | Xp11.23       | 0.096039 | 0.060759 | 0.10618  |
| FIGNL2    | 12q13.13      | 0.095974 | 0.060933 | 0.106474 |
| GNPNAT1   | 14q22.1       | 0.095937 | 0.061034 | 0.106642 |
| LINC01366 | 5q35.1        | 0.095925 | 0.061068 | 0.10669  |
| HMGB4     | 1p35.1        | -0.09592 | 0.061073 | 0.10669  |
| ATP6V1B1  | 2p13.3        | -0.09591 | 0.0611   | 0.106729 |
| TFCP2L1   | 2q14.2        | 0.095904 | 0.061124 | 0.106762 |
| SLC26A9   | 1q32.1        | 0.095887 | 0.061168 | 0.10683  |
| ZNF766    | 19q13.41      | 0.095845 | 0.061283 | 0.107021 |
| NBN       | 8q21.3        | 0.095818 | 0.061358 | 0.107143 |
| LECT2     | 5q31.1        | -0.0958  | 0.061401 | 0.107209 |
| DALRD3    | 3p21.31       | -0.09578 | 0.061452 | 0.107287 |
| HLTF      | 3q24          | 0.095767 | 0.061495 | 0.107344 |
| KLHL23    | 2q31.1        | 0.095767 | 0.061495 | 0.107344 |
| KLHL1     | 13q21.33      | 0.095758 | 0.06152  | 0.107372 |
| PTPA      | 9q34.11       | -0.09576 | 0.061521 | 0.107372 |
| RFPL3S    | 22q12.3       | -0.09575 | 0.061555 | 0.107416 |
| NEAT1     | 11q13.1       | -0.09574 | 0.061558 | 0.107416 |
| GABRG3    | 15q12         | 0.095726 | 0.061608 | 0.107494 |
| GGCX      | 2p11.2        | 0.095722 | 0.061617 | 0.107501 |
| C1QTNF8   | 16p13.3       | -0.09572 | 0.061623 | 0.107502 |
| MYOZ3     | 5q33.1        | 0.095714 | 0.06164  | 0.107522 |

|           |              |          |          |          |
|-----------|--------------|----------|----------|----------|
| KMT2B     | 19q13.12     | 0.095695 | 0.061693 | 0.107605 |
| MMP9      | 20q13.12     | 0.095689 | 0.061709 | 0.107624 |
| SFTPA2    | 10q22.3      | 0.095674 | 0.061749 | 0.107684 |
| CIITA     | 16p13.13     | 0.095664 | 0.061777 | 0.107724 |
| SDHAP2    | 3q29         | -0.09564 | 0.061839 | 0.107823 |
| KBTBD13   | 15q22.31     | 0.095637 | 0.061851 | 0.107834 |
| TBC1D1    | 4p14         | 0.095623 | 0.06189  | 0.107893 |
| RRM2B     | 8q22.3       | 0.095579 | 0.062009 | 0.108091 |
| LINC00906 | 19q12        | 0.095577 | 0.062016 | 0.108093 |
| TRAPPC9   | 8q24.3       | -0.09555 | 0.06209  | 0.108213 |
| ZUP1      | 6q22.1       | -0.09554 | 0.062107 | 0.108233 |
| ADAM17    | 2p25.1       | 0.095513 | 0.062191 | 0.108368 |
| CNIH4     | 1q42.11      | -0.09551 | 0.062195 | 0.108368 |
| VRK1      | 14q32.2      | -0.09551 | 0.062203 | 0.108373 |
| MPP3      | 17q21.31     | -0.0955  | 0.062223 | 0.108398 |
| FGF22     | 19p13.3      | 0.095498 | 0.062231 | 0.108402 |
| HCG18     | 6p22.1       | -0.09549 | 0.062241 | 0.10841  |
| KAZN      | 1p36.21      | -0.09547 | 0.062306 | 0.108515 |
| MORN4     | 10q24.2      | -0.09544 | 0.062383 | 0.108639 |
| ACACB     | 12q24.11     | 0.09544  | 0.062392 | 0.108645 |
| TMIGD1    | 17q11.2      | 0.095433 | 0.062411 | 0.108669 |
| NCKIPSD   | 3p21.31      | -0.09543 | 0.062428 | 0.108685 |
| TLR2      | 4q31.3       | 0.095425 | 0.062433 | 0.108685 |
| ID2B      | 3p14.2       | -0.09542 | 0.062437 | 0.108685 |
| DIPK1A    | 1p22.1       | 0.095412 | 0.062469 | 0.108732 |
| SNORA79   | 14q31.1      | -0.09538 | 0.062562 | 0.108884 |
| PCA3      | 9q21.2       | 0.095376 | 0.062568 | 0.108885 |
| MMAA      | 4q31.21      | 0.095347 | 0.062647 | 0.109014 |
| FASTKD5   | 20p13        | 0.095332 | 0.062692 | 0.109081 |
| PASD1     | Xq28         | -0.09532 | 0.06272  | 0.109122 |
| HIST1H2AD | 6p22.2       | -0.09532 | 0.062732 | 0.109133 |
| SERPINA9  | 14q32.13     | 0.095313 | 0.062742 | 0.10914  |
| NEK8      | 17q11.2      | -0.09528 | 0.062847 | 0.109314 |
| TMED5     | 1p22.1       | 0.095259 | 0.062894 | 0.109386 |
| MTERF4    | 2q37.3       | 0.095245 | 0.06293  | 0.109439 |
| MED6      | 14q24.2      | -0.09524 | 0.062949 | 0.109462 |
| ROM1      | 11q12.3      | -0.09517 | 0.063135 | 0.109776 |
| CCP110    | 16p12.3      | 0.095155 | 0.063182 | 0.109848 |
| ZNF718    | 4p16.3       | 0.095128 | 0.063258 | 0.109971 |
| IRF1      | 5q31.1       | -0.09511 | 0.063307 | 0.110046 |
| SPINK5    | 5q32         | 0.095102 | 0.063328 | 0.110074 |
| CTNNBIP1  | 1p36.22      | -0.0951  | 0.06334  | 0.110085 |
| NBPF9     | 1q21.2       | 0.095071 | 0.063415 | 0.110206 |
| CDK2      | 12q13.2      | -0.09506 | 0.063435 | 0.110231 |
| DMRTB1    | 1p32.3       | -0.09505 | 0.063466 | 0.110275 |
| CCL11     | 17q12        | 0.095043 | 0.063495 | 0.110317 |
| KRT17P5   | 17p11.2      | -0.09503 | 0.063541 | 0.110387 |
| CASP12    | 11q22.3      | 0.095017 | 0.063568 | 0.110425 |
| VSNL1     | 2p24.2       | -0.09501 | 0.063585 | 0.110443 |
| GCM1      | 6p12.1       | -0.095   | 0.063623 | 0.110499 |
| COP1      | 1q25.1-q25.2 | 0.094995 | 0.063628 | 0.110499 |
| ACTN4     | 19q13.2      | 0.094991 | 0.06364  | 0.110511 |
| ULK4      | 3p22.1       | -0.09498 | 0.063659 | 0.110534 |
| TMC5      | 16p12.3      | 0.094967 | 0.063706 | 0.110606 |
| CCDC14    | 3q21.1       | -0.09496 | 0.063739 | 0.110653 |
| HS3ST5    | 6q21-q22.1   | 0.094938 | 0.063788 | 0.110729 |
| KRTAP9-9  | 17q21.2      | -0.09492 | 0.063841 | 0.110812 |
| NUDT18    | 8p21.3       | -0.09491 | 0.063865 | 0.110843 |

|          |          |          |          |          |
|----------|----------|----------|----------|----------|
| ELMOD1   | 11q22.3  | 0.094906 | 0.063878 | 0.110856 |
| MRFAP1L1 | 4p16.1   | -0.0949  | 0.063901 | 0.110887 |
| SLC27A4  | 9q34.11  | -0.09488 | 0.06396  | 0.110979 |
| NT5C1B   | 2p24.2   | -0.09487 | 0.063971 | 0.111099 |
| SLC19A2  | 1q24.2   | -0.09484 | 0.064077 | 0.111163 |
| ATG4A    | Xq22.3   | 0.094829 | 0.064096 | 0.111187 |
| FAM221A  | 7p15.3   | -0.09482 | 0.064135 | 0.111239 |
| OCLM     | 1q31.1   | 0.094813 | 0.06414  | 0.111239 |
| RTP1     | 3q27.3   | 0.094812 | 0.064143 | 0.111239 |
| NOX5     | 15q23    | 0.094803 | 0.064167 | 0.111272 |
| FKRP     | 19q13.32 | 0.094784 | 0.064221 | 0.111356 |
| CABP7    | 22q12.2  | -0.09478 | 0.064235 | 0.111371 |
| PLPP6    | 9p24.1   | -0.09477 | 0.064254 | 0.111394 |
| CS       | 12q13.3  | 0.094753 | 0.06431  | 0.11148  |
| GMNN     | 6p22.3   | -0.09474 | 0.064338 | 0.11152  |
| DIAPH3   | 13q21.2  | -0.09473 | 0.064369 | 0.111563 |
| FAM210B  | 20q13.2  | -0.09473 | 0.064378 | 0.11157  |
| ZNF702P  | 19q13.41 | 0.094715 | 0.064416 | 0.111626 |
| PHKG1    | 7p11.2   | -0.09471 | 0.064434 | 0.111647 |
| XPOT     | 12q14.2  | -0.09469 | 0.06448  | 0.111717 |
| HOOK3    | 8p11.21  | 0.094687 | 0.064497 | 0.111737 |
| HEY2     | 6q22.31  | 0.094679 | 0.064519 | 0.111766 |
| EME2     | 16p13.3  | -0.09468 | 0.064531 | 0.111776 |
| CCDC65   | 12q13.12 | 0.094638 | 0.064636 | 0.111946 |
| AIDA     | 1q41     | 0.094636 | 0.06464  | 0.111946 |
| COBLL1   | 2q24.3   | 0.09463  | 0.06466  | 0.111971 |
| SEMG2    | 20q13.12 | 0.094589 | 0.064775 | 0.112161 |
| HAND2    | 4q34.1   | 0.094554 | 0.064875 | 0.112324 |
| WNT8B    | 10q24.31 | -0.09455 | 0.064883 | 0.112329 |
| GALC     | 14q31.3  | 0.094533 | 0.064933 | 0.112406 |
| APOBEC3B | 22q13.1  | -0.09453 | 0.064955 | 0.112433 |
| CLEC4D   | 12p13.31 | 0.0945   | 0.065028 | 0.112549 |
| WNT7B    | 22q13.31 | 0.094471 | 0.065112 | 0.112685 |
| MOB4     | 2q33.1   | 0.094447 | 0.06518  | 0.112793 |
| LIMK1    | 7q11.23  | -0.09441 | 0.065289 | 0.112973 |
| MRM3     | 17p13.3  | -0.0944  | 0.065312 | 0.113002 |
| TMEM215  | 9p21.1   | 0.094394 | 0.06533  | 0.11302  |
| KRT86    | 12q13.13 | -0.09439 | 0.065334 | 0.11302  |
| LRCH4    | 7q22.1   | -0.09438 | 0.065361 | 0.113059 |
| TBC1D3C  | 17q12    | -0.09438 | 0.065368 | 0.11306  |
| YEATS2   | 3q27.1   | 0.094372 | 0.065394 | 0.113096 |
| KRR1     | 12q21.2  | 0.094369 | 0.065404 | 0.113103 |
| TRIM47   | 17q25.1  | 0.094361 | 0.065425 | 0.11313  |
| SOWAHA   | 5q31.1   | -0.09434 | 0.065485 | 0.113224 |
| ADGRF2   | 6p12.3   | -0.09434 | 0.065498 | 0.113237 |
| HSBP1L1  | 18q23    | -0.09432 | 0.06554  | 0.113299 |
| CTNNB1   | 3p22.1   | 0.094313 | 0.065565 | 0.113332 |
| ZCCHC8   | 12q24.31 | 0.094311 | 0.06557  | 0.113332 |
| TOB2P1   | 6p22.1   | 0.094279 | 0.065662 | 0.113481 |
| SNORA66  | 1p22.1   | -0.0942  | 0.065881 | 0.11385  |
| BPIFA1   | 20q11.21 | -0.0942  | 0.065903 | 0.113878 |
| HOMER2   | 15q25.2  | 0.094188 | 0.065922 | 0.113901 |
| FGFRL1   | 4p16.3   | -0.09416 | 0.066012 | 0.114045 |
| RPSAP52  | 12q14.3  | 0.094111 | 0.066146 | 0.11426  |
| CCDC171  | 9p22.3   | 0.09411  | 0.066147 | 0.11426  |
| FABP2    | 4q26     | 0.0941   | 0.066178 | 0.114303 |
| GRIK1    | 21q21.3  | 0.094085 | 0.066222 | 0.11437  |
| STRAP    | 12p12.3  | -0.09405 | 0.066337 | 0.114558 |

|           |               |          |          |          |
|-----------|---------------|----------|----------|----------|
| DAB1      | 1p32.2        | -0.09404 | 0.066351 | 0.114572 |
| ASB16     | 17q21.31      | -0.09403 | 0.066376 | 0.114606 |
| FAM149A   | 4q35.1        | 0.094028 | 0.066386 | 0.114612 |
| AMER3     | 2q21.1        | 0.094021 | 0.066407 | 0.11464  |
| BBS10     | 12q21.2       | -0.09401 | 0.066431 | 0.114671 |
| PCDHGA1   | 5q31.3        | 0.093987 | 0.066505 | 0.11479  |
| CDH23     | 10q22.1       | 0.093957 | 0.066593 | 0.114932 |
| ERF       | 19q13.2       | -0.09394 | 0.066656 | 0.115026 |
| HIST1H2AG | 6p22.1        | -0.09393 | 0.06666  | 0.115026 |
| TRAF7     | 16p13.3       | -0.09392 | 0.066699 | 0.115084 |
| RNH1      | 11p15.5       | -0.09391 | 0.06674  | 0.115146 |
| KRT39     | 17q21.2       | -0.09386 | 0.066868 | 0.115347 |
| ADCY8     | 8q24.22       | 0.093862 | 0.066868 | 0.115347 |
| RDX       | 11q22.3       | 0.093859 | 0.066877 | 0.115352 |
| ZC3H4     | 19q13.32      | 0.093849 | 0.066908 | 0.115395 |
| CCL20     | 2q36.3        | -0.09384 | 0.066938 | 0.115437 |
| DDR1      | 6p21.33       | 0.0938   | 0.067052 | 0.115623 |
| KLRD1     | 12p13.2       | 0.093794 | 0.067067 | 0.115639 |
| HGFAC     | 4p16.3        | -0.09376 | 0.067175 | 0.115806 |
| MAGEB3    | Xp21.2        | -0.09376 | 0.067175 | 0.115806 |
| PRDM4     | 12q23.3       | 0.093735 | 0.067242 | 0.115911 |
| VPS16     | 20p13         | -0.09373 | 0.067255 | 0.115924 |
| RFPL4A    | 19q13.42      | 0.093717 | 0.067294 | 0.115981 |
| C10ORF113 | 10p12.31      | -0.0937  | 0.06733  | 0.116033 |
| BMP10     | 2p13.3        | 0.093698 | 0.067349 | 0.116056 |
| FIBCD1    | 9q34.12       | 0.093652 | 0.067483 | 0.116277 |
| FOLR1     | 11q13.4       | -0.09364 | 0.067528 | 0.116344 |
| MCAM      | 11q23.3       | 0.093612 | 0.067603 | 0.116464 |
| LRRC18    | 10q11.23      | 0.093601 | 0.067634 | 0.116506 |
| CENPK     | 5q12.3        | -0.09359 | 0.067661 | 0.116543 |
| IQCA1     | 2q37.2-q37.3  | 0.093576 | 0.067708 | 0.116614 |
| ZFYVE21   | 14q32.33      | 0.093552 | 0.067778 | 0.116725 |
| ENKUR     | 10p12.1       | 0.093538 | 0.067821 | 0.116785 |
| NRXN2     | 11q13.1       | -0.09354 | 0.067825 | 0.116785 |
| MS4A14    | 11q12.2       | 0.09353  | 0.067844 | 0.116808 |
| LHX3      | 9q34.3        | -0.09352 | 0.067866 | 0.116808 |
| FAM153CP  | 5q35.3        | 0.093522 | 0.067866 | 0.116808 |
| OR2D2     | 11p15.4       | -0.09352 | 0.067871 | 0.116808 |
| TPCN2     | 11q13.3       | -0.09352 | 0.067872 | 0.116808 |
| KREMEN2   | 16p13.3       | -0.09352 | 0.067877 | 0.116808 |
| PM20D1    | 1q32.1        | 0.093518 | 0.067879 | 0.116808 |
| TUBAL3    | 10p15.1       | -0.09351 | 0.067905 | 0.116843 |
| EVI5L     | 19p13.2       | 0.093503 | 0.067924 | 0.116865 |
| SOGA1     | 20q11.23      | 0.093489 | 0.067965 | 0.116927 |
| EMX2OS    | 10q26.11      | 0.093474 | 0.068009 | 0.116992 |
| PSAPL1    | 4p16.1        | 0.093471 | 0.068018 | 0.116997 |
| HOXA11-AS | 7p15.2        | -0.09346 | 0.068053 | 0.117048 |
| WFDC8     | 20q13.12      | 0.093444 | 0.068099 | 0.117115 |
| TRIM54    | 2p23.3        | -0.09344 | 0.06812  | 0.117142 |
| CTTN      | 11q13.3       | -0.09343 | 0.068141 | 0.117168 |
| L2HGDH    | 14q21.3       | 0.093424 | 0.068157 | 0.117177 |
| STPG2     | 4q22.3-q23    | -0.09342 | 0.068157 | 0.117177 |
| PRODH2    | 19q13.12      | -0.09342 | 0.068175 | 0.117197 |
| HCG26     | 6p21.33       | -0.09341 | 0.068197 | 0.117225 |
| FBXO40    | 3q13.33       | 0.0934   | 0.068229 | 0.11727  |
| STAR      | 8p11.23       | -0.09338 | 0.0683   | 0.117382 |
| SYT9      | 11p15.4       | 0.093368 | 0.068323 | 0.11741  |
| SLC35F1   | 6q22.2-q22.31 | 0.093364 | 0.068335 | 0.117421 |

|              |              |          |          |          |
|--------------|--------------|----------|----------|----------|
| NDUFA5       | 7q31.32      | -0.09334 | 0.068398 | 0.117519 |
| ARG1         | 6q23.2       | 0.093339 | 0.068412 | 0.117533 |
| ACTBL2       | 5q11.2       | 0.093328 | 0.068442 | 0.117574 |
| C3ORF22      | 3q21.3       | -0.09331 | 0.068496 | 0.117657 |
| SNAI3        | 16q24.2      | 0.093301 | 0.068522 | 0.11769  |
| ANLN         | 7p14.2       | 0.0933   | 0.068527 | 0.11769  |
| LOC284798    | 20p11.21     | -0.09326 | 0.068634 | 0.117864 |
| PDZD9        | 16p12.2      | -0.09326 | 0.068644 | 0.117871 |
| ZNRD1ASP     | 6p22.1       | -0.09326 | 0.06865  | 0.117872 |
| OLFM4        | 13q14.3      | 0.09325  | 0.068674 | 0.117902 |
| UGT3A2       | 5p13.2       | 0.093219 | 0.068767 | 0.118042 |
| ARL13B       | 3q11.1-q11.2 | 0.093219 | 0.068768 | 0.118042 |
| ZCCHC24      | 10q22.3      | 0.093217 | 0.068773 | 0.118042 |
| LRRC7        | 1p31.1       | 0.093214 | 0.068781 | 0.118046 |
| SREK1        | 5q12.3       | 0.093201 | 0.068821 | 0.118104 |
| PSMC6        | 14q22.1      | -0.09318 | 0.068871 | 0.118179 |
| LINC02693    | 17p11.2      | 0.09318  | 0.068885 | 0.118194 |
| TSPEAR-AS2   | 21q22.3      | -0.09317 | 0.068922 | 0.118248 |
| UGT1A7       | 2q37.1       | 0.093157 | 0.068952 | 0.118288 |
| FOXD2        | 1p33         | -0.09315 | 0.068977 | 0.118321 |
| TSPYL4       | 6q22.1       | 0.093136 | 0.069016 | 0.118379 |
| OR6B3        | 2q37.3       | -0.09312 | 0.069066 | 0.118453 |
| TPP1         | 11p15.4      | 0.093112 | 0.069088 | 0.118482 |
| CPLX1        | 4p16.3       | -0.09309 | 0.069166 | 0.118605 |
| MARCO        | 2q14.2       | 0.09308  | 0.069183 | 0.118618 |
| ATXN2L       | 16p11.2      | -0.09308 | 0.069185 | 0.118618 |
| STK40        | 1p34.3       | -0.09307 | 0.069203 | 0.118638 |
| OR10K1       | 1q23.1       | -0.09304 | 0.069295 | 0.118785 |
| SLC9B1       | 4q24         | -0.09304 | 0.069303 | 0.118789 |
| UBL7         | 15q24.1      | 0.093023 | 0.069355 | 0.118869 |
| CAPN5        | 11q13.5      | 0.092957 | 0.069554 | 0.119198 |
| KCNJ1        | 11q24.3      | 0.092945 | 0.069589 | 0.119248 |
| MX2          | 21q22.3      | 0.092928 | 0.069642 | 0.119329 |
| FAM83A       | 8q24.13      | 0.092916 | 0.069676 | 0.119377 |
| ZNF488       | 10q11.22     | 0.09289  | 0.069755 | 0.119503 |
| CH25H        | 10q23.31     | 0.092886 | 0.069767 | 0.119513 |
| FAM124A      | 13q14.3      | 0.092884 | 0.069775 | 0.119517 |
| ATP5MGL      | 22q13.2      | -0.09288 | 0.069792 | 0.119535 |
| OARD1        | 6p21.1       | -0.09287 | 0.069814 | 0.119562 |
| DUSP5P1      | 1q42.13      | 0.092852 | 0.069871 | 0.119651 |
| NCL          | 2q37.1       | -0.09284 | 0.069899 | 0.119688 |
| INTS3        | 1q21.3       | 0.092823 | 0.069959 | 0.11978  |
| GJB5         | 1p34.3       | 0.092784 | 0.070075 | 0.119969 |
| APOL1        | 22q12.3      | 0.092778 | 0.070096 | 0.119994 |
| TMEM17       | 2p15         | -0.09277 | 0.070108 | 0.120005 |
| INHBE        | 12q13.3      | -0.09277 | 0.070124 | 0.120021 |
| NUP35        | 2q32.1       | -0.09275 | 0.070175 | 0.120099 |
| ATP11AUN     | 13q34        | -0.09275 | 0.070183 | 0.120102 |
| PLCB3        | 11q13.1      | -0.09274 | 0.070223 | 0.120161 |
| LRFN3        | 19q13.12     | 0.092726 | 0.070252 | 0.120199 |
| C1QBP        | 17p13.2      | -0.09272 | 0.070272 | 0.120223 |
| SERINC4      | 15q15.3      | 0.092703 | 0.070322 | 0.120291 |
| LOC284379    | 19q13.42     | -0.0927  | 0.070325 | 0.120291 |
| ZNF19        | 16q22.2      | -0.0927  | 0.070329 | 0.120291 |
| SEC31B       | 10q24.31     | -0.09269 | 0.070367 | 0.120339 |
| MED7         | 5q33.3       | -0.09269 | 0.070369 | 0.120339 |
| BORCS8-MEF2B | 19p13.11     | -0.09267 | 0.070431 | 0.120434 |
| NOL11        | 17q24.2      | -0.09266 | 0.070447 | 0.120452 |

|              |                 |          |          |          |
|--------------|-----------------|----------|----------|----------|
| SLC24A2      | 9p22.1-p21.3    | 0.092651 | 0.070481 | 0.120499 |
| PNMT         | 17q12           | -0.09265 | 0.070487 | 0.120499 |
| SAFB2        | 19p13.3         | -0.09263 | 0.070542 | 0.120582 |
| ARF3         | 12q13.12        | 0.092618 | 0.070583 | 0.120643 |
| CTSH         | 15q25.1         | -0.09259 | 0.070668 | 0.120777 |
| CCDC120      | Xp11.23         | -0.09257 | 0.070734 | 0.12087  |
| SIK1         | 21q22.3         | 0.092568 | 0.070734 | 0.12087  |
| TMOD2        | 15q21.2         | 0.092555 | 0.070775 | 0.12093  |
| CMPK2        | 2p25.2          | 0.092526 | 0.070864 | 0.12107  |
| OR13J1       | 9p13.3          | -0.09251 | 0.070918 | 0.121152 |
| GAD2         | 10p12.1         | 0.092506 | 0.070925 | 0.121154 |
| PACIN1       | 6p21.31         | 0.092504 | 0.070931 | 0.121155 |
| ATP6V1D      | 14q23.3         | 0.092499 | 0.070947 | 0.121172 |
| SLCO3A1      | 15q26.1         | 0.092473 | 0.071025 | 0.121294 |
| SLC22A5      | 5q31.1          | -0.09246 | 0.071052 | 0.12133  |
| VPS8         | 3q27.2          | 0.092455 | 0.071082 | 0.121371 |
| TNFAIP8L1    | 19p13.3         | 0.092429 | 0.071161 | 0.121496 |
| SLC39A12     | 10p12.33        | 0.0924   | 0.071249 | 0.121636 |
| C12ORF54     | 12q13.11        | -0.09239 | 0.071284 | 0.12168  |
| GPR18        | 13q32.3         | 0.092388 | 0.071287 | 0.12168  |
| DCAF8        | 1q23.2          | 0.092378 | 0.071318 | 0.121722 |
| SPRY2        | 13q31.1         | 0.092344 | 0.071421 | 0.12188  |
| SCO1         | 17p13.1         | 0.092344 | 0.071423 | 0.12188  |
| CYP4F3       | 19p13.12        | -0.09233 | 0.071453 | 0.12192  |
| CYREN        | 7q33            | -0.09231 | 0.071518 | 0.122022 |
| OVCH2        | 11p15.4         | -0.0923  | 0.071553 | 0.122072 |
| KLK3         | 19q13.33        | 0.092298 | 0.071563 | 0.122077 |
| HOXD10       | 2q31.1          | 0.092279 | 0.071622 | 0.122167 |
| TNFRSF14-AS1 | 1p36.32         | -0.09226 | 0.071694 | 0.12228  |
| TRIM24       | 7q33-q34        | -0.09221 | 0.071847 | 0.122532 |
| SPOCD1       | 1p35.2          | 0.092175 | 0.071944 | 0.122686 |
| HEBP1        | 12p13.1         | -0.09217 | 0.071951 | 0.122688 |
| SMTNL1       | 11q12.1         | -0.09216 | 0.071978 | 0.122723 |
| PLLP         | 16q13           | 0.092158 | 0.071996 | 0.122744 |
| ANKRD30BP2   | 21q11.2         | -0.09216 | 0.072004 | 0.122746 |
| CLVS2        | 6q22.31         | 0.092136 | 0.072063 | 0.122837 |
| CDC42EP2     | 11q13.1         | 0.092132 | 0.072078 | 0.122852 |
| KCNH2        | 7q36.1          | -0.09212 | 0.072102 | 0.122883 |
| C10ORF62     | 10q24.2         | -0.09212 | 0.072125 | 0.122905 |
| CUX1         | 7q22.1          | -0.09212 | 0.072128 | 0.122905 |
| CYB5D1       | 17p13.1         | 0.092085 | 0.072224 | 0.123051 |
| FOXL1        | 16q24.1         | 0.092084 | 0.072225 | 0.123051 |
| SLC17A8      | 12q23.1         | 0.092067 | 0.072278 | 0.12313  |
| ROPN1        | 3q21.1          | 0.092061 | 0.072299 | 0.123147 |
| CFAP73       | 12q24.13        | -0.09206 | 0.0723   | 0.123147 |
| CHAF1B       | 21q22.12-q22.13 | -0.09204 | 0.072371 | 0.123257 |
| DRD5         | 4p16.1          | 0.092029 | 0.072399 | 0.123293 |
| HSPB8        | 12q24.23        | 0.092024 | 0.072414 | 0.123309 |
| EMX1         | 2p13.2          | 0.092002 | 0.072483 | 0.123412 |
| PGC          | 6p21.1          | -0.092   | 0.072487 | 0.123412 |
| LOC153910    | 6q24.2          | 0.091983 | 0.072542 | 0.123495 |
| DNAJC24      | 11p13           | -0.09197 | 0.072595 | 0.123575 |
| ITGAE        | 17p13.2         | -0.09195 | 0.072636 | 0.123634 |
| TTLL13P      | 15q26.1         | 0.091949 | 0.072647 | 0.123642 |
| CD1B         | 1q23.1          | 0.091936 | 0.072687 | 0.12369  |
| IQCD         | 12q24.13        | 0.091936 | 0.072687 | 0.12369  |
| CAMK1G       | 1q32.2          | 0.091909 | 0.072771 | 0.123822 |
| ZCCHC10      | 5q31.1          | 0.091904 | 0.072787 | 0.123838 |

|           |              |          |          |          |
|-----------|--------------|----------|----------|----------|
| ST8SIA3   | 18q21.31     | 0.091888 | 0.072838 | 0.123914 |
| LINC00472 | 6q13         | 0.091885 | 0.072849 | 0.123923 |
| HTR2B     | 2q37.1       | 0.09188  | 0.072863 | 0.123936 |
| SLC12A3   | 16q13        | 0.091854 | 0.072943 | 0.124062 |
| PIGH      | 14q24.1      | -0.09185 | 0.072957 | 0.124076 |
| SLC6A10P  | 16p11.2      | 0.091843 | 0.072979 | 0.124102 |
| POU3F3    | 2q12.1       | 0.091835 | 0.073004 | 0.124128 |
| IDNK      | 9q21.32      | -0.09183 | 0.073006 | 0.124128 |
| CARMIL2   | 16q22.1      | 0.091809 | 0.073084 | 0.124249 |
| MT1M      | 16q13        | 0.091785 | 0.073162 | 0.12437  |
| ZNRF4     | 19p13.3      | 0.091755 | 0.073255 | 0.124519 |
| FOXD4L3   | 9q21.11      | 0.091753 | 0.073262 | 0.12452  |
| IL17A     | 6p12.2       | -0.09175 | 0.073274 | 0.124529 |
| HAVCR1    | 5q33.3       | 0.09174  | 0.073304 | 0.124569 |
| KCTD14    | 11q14.1      | -0.09172 | 0.073359 | 0.124653 |
| ZNF526    | 19q13.2      | 0.091697 | 0.073439 | 0.124779 |
| ETV5      | 3q27.2       | 0.091662 | 0.07355  | 0.124956 |
| HEMGN     | 9q22.33      | 0.091648 | 0.073591 | 0.125015 |
| MTMR7     | 8p22         | -0.09165 | 0.073601 | 0.125021 |
| ZNF565    | 19q13.12     | -0.09164 | 0.073611 | 0.125024 |
| ARID3A    | 19p13.3      | -0.09164 | 0.073615 | 0.125024 |
| ABCD1     | Xq28         | -0.09162 | 0.07369  | 0.125133 |
| LRRC2     | 3p21.31      | -0.09162 | 0.073692 | 0.125133 |
| HOXC11    | 12q13.13     | -0.09161 | 0.073703 | 0.125143 |
| ZSCAN25   | 7q22.1       | -0.09159 | 0.073768 | 0.125241 |
| IFT122    | 3q21.3-q22.1 | 0.091567 | 0.073848 | 0.125367 |
| KIZ       | 20p11.23     | -0.09155 | 0.073901 | 0.125447 |
| DDX19B    | 16q22.1      | -0.09154 | 0.073946 | 0.125512 |
| GPR182    | 12q13.3      | 0.091531 | 0.073961 | 0.125527 |
| JRK       | 8q24.3       | -0.09153 | 0.073969 | 0.12553  |
| CD248     | 11q13.2      | 0.09151  | 0.074029 | 0.125621 |
| MYH14     | 19q13.33     | 0.091479 | 0.074126 | 0.125769 |
| NDRG4     | 16q21        | -0.09148 | 0.074131 | 0.125769 |
| TDG       | 12q23.3      | 0.091477 | 0.074135 | 0.125769 |
| NODAL     | 10q22.1      | -0.09147 | 0.074168 | 0.125814 |
| CBLC      | 19q13.32     | -0.09146 | 0.074196 | 0.125851 |
| SYNC      | 1p35.1       | 0.091414 | 0.074335 | 0.12606  |
| GYG1      | 3q24         | -0.09141 | 0.074337 | 0.12606  |
| LINC01000 | 7q32.1       | -0.09141 | 0.074338 | 0.12606  |
| SPANXB1   | Xq27.1       | -0.09141 | 0.074348 | 0.126067 |
| NCAN      | 19p13.11     | 0.091389 | 0.074412 | 0.126164 |
| DCLRE1B   | 1p13.2       | 0.091364 | 0.074494 | 0.126293 |
| KLRG1     | 12p13.31     | 0.091331 | 0.0746   | 0.126461 |
| NPW       | 16p13.3      | -0.09132 | 0.074635 | 0.12651  |
| B3GLCT    | 13q12.3      | 0.09131  | 0.074667 | 0.126547 |
| LOC440040 | 11p11.12     | -0.09131 | 0.074669 | 0.126547 |
| HTRA4     | 8p11.22      | 0.091307 | 0.074676 | 0.126547 |
| HIST1H2BO | 6p22.1       | -0.0913  | 0.074682 | 0.126547 |
| PHF7      | 3p21.1       | 0.091292 | 0.074724 | 0.126607 |
| HDAC2     | 6q21         | -0.09129 | 0.074744 | 0.12663  |
| STAG3     | 7q22.1       | -0.09127 | 0.074796 | 0.126708 |
| MYADML    | 2p22.3       | 0.091263 | 0.074815 | 0.126729 |
| EXOC3L4   | 14q32.32     | -0.09125 | 0.074842 | 0.126764 |
| KRT7      | 12q13.13     | 0.091227 | 0.074932 | 0.126906 |
| TTC24     | 1q22         | 0.091207 | 0.074994 | 0.127001 |
| UCHL5     | 1q31.2       | 0.0912   | 0.075017 | 0.127028 |
| FOXD2-AS1 | 1p33         | -0.09119 | 0.075057 | 0.127085 |
| SERPINA4  | 14q32.13     | -0.09118 | 0.075073 | 0.127101 |

|           |                 |          |          |          |
|-----------|-----------------|----------|----------|----------|
| TSPAN15   | 10q22.1         | 0.091147 | 0.075186 | 0.127282 |
| CLEC16A   | 16p13.13        | 0.091135 | 0.075226 | 0.12734  |
| PCF11     | 11q14.1         | 0.091125 | 0.075258 | 0.127383 |
| ENO2      | 12p13.31        | 0.091103 | 0.075329 | 0.127484 |
| CCDC196   | 14q23.3         | 0.091102 | 0.075331 | 0.127484 |
| IFNA5     | 9p21.3          | 0.091092 | 0.075363 | 0.127518 |
| ACSL4     | Xq23            | 0.091092 | 0.075363 | 0.127518 |
| RHOG      | 11p15.4         | -0.09107 | 0.075425 | 0.127611 |
| ALG10B    | 12q12           | 0.09107  | 0.075436 | 0.127619 |
| MGAT4C    | 12q21.31-q21.32 | 0.09106  | 0.075466 | 0.127659 |
| ZNF160    | 19q13.41-q13.42 | 0.091051 | 0.075498 | 0.127702 |
| KCNS1     | 20q13.12        | 0.091032 | 0.075556 | 0.12779  |
| RNF183    | 9q32            | 0.09102  | 0.075597 | 0.127848 |
| KRT18P55  | 17q11.2         | 0.091013 | 0.075619 | 0.127875 |
| PRAMEF4   | 1p36.21         | -0.091   | 0.075647 | 0.127907 |
| MYNN      | 3q26.2          | 0.091003 | 0.075651 | 0.127907 |
| FAM98A    | 2p22.3          | -0.091   | 0.075659 | 0.12791  |
| NDST3     | 4q26            | 0.090994 | 0.075679 | 0.127933 |
| OR56B1    | 11p15.4         | 0.09097  | 0.075758 | 0.128056 |
| PDX1      | 13q12.2         | -0.09094 | 0.075854 | 0.128207 |
| FGF21     | 19q13.33        | -0.09093 | 0.075894 | 0.128265 |
| ST3GAL3   | 1p34.1          | -0.09091 | 0.075943 | 0.128336 |
| TBX3      | 12q24.21        | 0.090897 | 0.075994 | 0.128411 |
| CCDC160   | Xq26.2          | 0.090884 | 0.076037 | 0.128474 |
| PTPN6     | 12p13.31        | -0.09088 | 0.07606  | 0.128501 |
| HBZ       | 16p13.3         | 0.090865 | 0.076096 | 0.128546 |
| ERO1B     | 1q42.3          | 0.090865 | 0.076099 | 0.128546 |
| TEX19     | 17q25.3         | -0.09086 | 0.076114 | 0.128559 |
| VPS50     | 7q21.2-q21.3    | 0.090852 | 0.07614  | 0.128594 |
| KBTBD12   | 3q21.3          | 0.090823 | 0.076235 | 0.128742 |
| THAP5     | 7q31.1          | 0.090783 | 0.076365 | 0.128951 |
| LINC01124 | 2q31.1          | -0.09078 | 0.076381 | 0.128968 |
| NLRP7     | 19q13.42        | 0.090763 | 0.07643  | 0.129039 |
| SYN3      | 22q12.3         | -0.09076 | 0.076445 | 0.129054 |
| BECN1     | 17q21.31        | 0.09074  | 0.076504 | 0.129142 |
| PIP4K2C   | 12q13.3         | 0.090735 | 0.076521 | 0.12916  |
| GBGT1     | 9q34.2          | -0.09073 | 0.076532 | 0.129167 |
| IL2       | 4q27            | 0.090698 | 0.076642 | 0.129343 |
| MT1F      | 16q13           | -0.09069 | 0.076664 | 0.129368 |
| CKAP2     | 13q14.3         | -0.09069 | 0.076677 | 0.12938  |
| HPS3      | 3q24            | 0.090675 | 0.076717 | 0.129433 |
| TAS2R19   | 12p13.2         | -0.09067 | 0.076722 | 0.129433 |
| AK3       | 9p24.1          | -0.09065 | 0.076786 | 0.129531 |
| C19ORF12  | 19q12           | -0.09065 | 0.076806 | 0.129546 |
| PTF1A     | 10p12.2         | -0.09065 | 0.076808 | 0.129546 |
| SNTB1     | 8q24.12         | -0.09064 | 0.076815 | 0.129548 |
| SOX21     | 13q32.1         | 0.090633 | 0.076852 | 0.129599 |
| ADO       | 10q21.3         | 0.090602 | 0.076956 | 0.129764 |
| LRRIQ3    | 1p31.1          | -0.09059 | 0.076985 | 0.129801 |
| OR10A5    | 11p15.4         | -0.09058 | 0.077012 | 0.129836 |
| ZNF512B   | 20q13.33        | 0.090549 | 0.077129 | 0.130022 |
| CCDC97    | 19q13.2         | 0.090504 | 0.077277 | 0.130261 |
| NBPF4     | 1p13.3          | 0.090464 | 0.077407 | 0.13047  |
| SRSF8     | 11q21           | 0.090437 | 0.077495 | 0.130606 |
| PRDX6     | 1q25.1          | -0.0904  | 0.077623 | 0.130811 |
| ZNF483    | 9q31.3          | 0.090382 | 0.077679 | 0.130885 |
| SENP5     | 3q29            | -0.09038 | 0.07768  | 0.130885 |
| VCY       | Yq11.221        | -0.09038 | 0.077686 | 0.130885 |



|           |             |          |          |          |
|-----------|-------------|----------|----------|----------|
| CCL7      | 17q12       | 0.090376 | 0.077696 | 0.13089  |
| PCK2      | 14q11.2-q12 | -0.09037 | 0.077706 | 0.130896 |
| TLL4      | 2q35        | -0.09035 | 0.077772 | 0.130996 |
| ZNF266    | 19p13.2     | -0.09034 | 0.077805 | 0.13104  |
| TPTEP1    | 22q11.1     | 0.090334 | 0.077836 | 0.131081 |
| ODAPH     | 4q21.1      | 0.090319 | 0.077885 | 0.131154 |
| ITIH1     | 3p21.1      | 0.09029  | 0.077983 | 0.131307 |
| CENPI     | Xq22.1      | 0.090278 | 0.078021 | 0.131359 |
| HAUS6     | 9p22.1      | -0.09028 | 0.078027 | 0.131359 |
| DCTN2     | 12q13.3     | -0.09026 | 0.078095 | 0.131462 |
| DMBT1     | 10q26.13    | 0.090247 | 0.078123 | 0.131498 |
| UBA2      | 19q13.11    | -0.09023 | 0.078175 | 0.131576 |
| RNF26     | 11q23.3     | -0.09021 | 0.078236 | 0.131667 |
| FAM181B   | 11q14.1     | 0.090199 | 0.078283 | 0.131734 |
| SMG5      | 1q22        | -0.0902  | 0.078295 | 0.131744 |
| TUSC1     | 9p21.2      | -0.09018 | 0.078341 | 0.13181  |
| WDR89     | 14q23.2     | 0.090168 | 0.078386 | 0.131867 |
| MICALL1   | 22q13.1     | 0.090167 | 0.078388 | 0.131867 |
| LINC00593 | 15q23       | 0.090143 | 0.078468 | 0.13199  |
| PTPRU     | 1p35.3      | 0.090133 | 0.078504 | 0.132038 |
| XPNPEP1   | 10q25.1     | 0.090131 | 0.078509 | 0.132038 |
| WNT2      | 7q31.2      | 0.090123 | 0.078537 | 0.132074 |
| BMP1      | 8p21.3      | 0.090117 | 0.078557 | 0.132085 |
| APOLD1    | 12p13.1     | 0.090116 | 0.078557 | 0.132085 |
| IFT172    | 2p23.3      | -0.0901  | 0.078617 | 0.132175 |
| PCDH20    | 13q21.2     | 0.090096 | 0.078625 | 0.132177 |
| TUBB2A    | 6p25.2      | 0.090094 | 0.078632 | 0.132177 |
| OR13A1    | 10q11.21    | 0.090091 | 0.078643 | 0.132184 |
| CKMT1B    | 15q15.3     | 0.090081 | 0.078674 | 0.132226 |
| HS6ST3    | 13q32.1     | 0.090068 | 0.078718 | 0.132285 |
| GIPC2     | 1p31.1      | -0.09007 | 0.078722 | 0.132285 |
| SLC1A1    | 9p24.2      | 0.090041 | 0.078808 | 0.132418 |
| LINC00667 | 18p11.31    | 0.090034 | 0.078831 | 0.132446 |
| RAB5C     | 17q21.2     | 0.090028 | 0.078854 | 0.132472 |
| VWA5B1    | 1p36.12     | -0.09    | 0.078939 | 0.132596 |
| KAT7      | 17q21.33    | 0.090001 | 0.078943 | 0.132596 |
| UMPS      | 3q21.2      | -0.09    | 0.078947 | 0.132596 |
| TMEM102   | 17p13.1     | 0.089976 | 0.079027 | 0.132719 |
| OCIAD2    | 4p11        | -0.08996 | 0.079093 | 0.132819 |
| FAM138E   | 15q26.3     | -0.08992 | 0.079213 | 0.133009 |
| RIOK1     | 6p24.3      | -0.08992 | 0.07922  | 0.13301  |
| ITGA9     | 3p22.2      | 0.089849 | 0.079452 | 0.133388 |
| AMZ1      | 7p22.3      | 0.089808 | 0.079589 | 0.133606 |
| SERPINE1  | 7q22.1      | 0.089803 | 0.079605 | 0.133622 |
| PIP5KL1   | 9q34.11     | -0.0898  | 0.07963  | 0.133653 |
| EMX2      | 10q26.11    | 0.089792 | 0.079644 | 0.133666 |
| PREPL     | 2p21        | 0.089789 | 0.079655 | 0.133672 |
| NPAP1     | 15q11.2     | 0.089768 | 0.079725 | 0.133778 |
| PRKAG1    | 12q13.12    | -0.08976 | 0.07975  | 0.133809 |
| INS       | 11p15.5     | -0.08975 | 0.079793 | 0.133871 |
| TCEAL7    | Xq22.2      | 0.089741 | 0.079814 | 0.133894 |
| AATBC     | 21q22.3     | 0.089729 | 0.079855 | 0.133952 |
| HIC2      | 22q11.21    | -0.08972 | 0.079901 | 0.133999 |
| KHDRBS2   | 6q11.1      | 0.089715 | 0.079904 | 0.133999 |
| RSU1P2    | 10q11.21    | 0.089714 | 0.079908 | 0.133999 |
| HYMAI     | 6q24.2      | -0.08971 | 0.07991  | 0.133999 |
| LINC00304 | 16q24.3     | 0.089695 | 0.07997  | 0.134089 |
| TEX26     | 13q12.3     | 0.089687 | 0.079998 | 0.134125 |

|           |          |          |          |          |
|-----------|----------|----------|----------|----------|
| RPLP0P2   | 11q12.2  | -0.08968 | 0.080031 | 0.134168 |
| TMEM50B   | 21q22.11 | 0.089665 | 0.08007  | 0.134223 |
| SRRM5     | 19q13.31 | -0.08966 | 0.080096 | 0.134255 |
| NECTIN1   | 11q23.3  | 0.089652 | 0.080114 | 0.134275 |
| TPRG1     | 3q28     | 0.089632 | 0.080185 | 0.134382 |
| SMAP1     | 6q13     | 0.089602 | 0.080284 | 0.134536 |
| ELOA2     | 18q21.1  | 0.089598 | 0.080298 | 0.134549 |
| GTDC1     | 2q22.3   | -0.08957 | 0.080396 | 0.134702 |
| MCM5      | 22q12.3  | -0.08954 | 0.080489 | 0.134846 |
| KRT84     | 12q13.13 | 0.089523 | 0.080553 | 0.134942 |
| ITGA3     | 17q21.33 | 0.089502 | 0.080623 | 0.135049 |
| AMTN      | 4q13.3   | 0.089473 | 0.080724 | 0.135206 |
| ASB12     | Xq11.2   | 0.089467 | 0.080742 | 0.135225 |
| JAKMIP1   | 4p16.1   | 0.089455 | 0.080783 | 0.135258 |
| ITFG2     | 12p13.33 | -0.08945 | 0.080787 | 0.135258 |
| AGTR2     | Xq23     | 0.089454 | 0.080788 | 0.135258 |
| TCEAL1    | Xq22.2   | -0.08945 | 0.080789 | 0.135258 |
| RERE      | 1p36.23  | 0.089438 | 0.080842 | 0.135335 |
| TMC8      | 17q25.3  | 0.089436 | 0.080848 | 0.135335 |
| ASIP      | 20q11.22 | -0.08941 | 0.080945 | 0.135485 |
| RFFL      | 17q12    | 0.089399 | 0.080974 | 0.135522 |
| TXNDCC5   | 6p24.3   | 0.089391 | 0.081002 | 0.135558 |
| ADAMTSL2  | 9q34.2   | -0.08938 | 0.081026 | 0.135582 |
| SLC24A5   | 15q21.1  | -0.08938 | 0.081029 | 0.135582 |
| FAM3D     | 3p14.2   | 0.089367 | 0.081085 | 0.135664 |
| PAPSS1    | 4q25     | 0.089357 | 0.08112  | 0.13571  |
| MKLN1     | 7q32.3   | 0.089328 | 0.081216 | 0.13586  |
| MLLT11    | 1q21.3   | 0.08932  | 0.081245 | 0.135897 |
| AP1G2     | 14q11.2  | -0.08931 | 0.081267 | 0.135913 |
| B4GALNT1  | 12q13.3  | 0.089312 | 0.081271 | 0.135913 |
| EFEMP2    | 11q13.1  | 0.089311 | 0.081275 | 0.135913 |
| AKR7A3    | 1p36.13  | -0.08931 | 0.081294 | 0.135933 |
| ZFPM1     | 16q24.2  | -0.08929 | 0.081344 | 0.136005 |
| NMRK1     | 9q21.13  | -0.08927 | 0.081418 | 0.136118 |
| FRMPD4    | Xp22.2   | 0.089258 | 0.081456 | 0.13617  |
| CD9       | 12p13.31 | 0.089255 | 0.081466 | 0.136176 |
| GCG       | 2q24.2   | 0.089246 | 0.0815   | 0.136221 |
| SEC23B    | 20p11.23 | 0.089235 | 0.081538 | 0.136273 |
| MAGEB6    | Xp21.3   | -0.08923 | 0.081564 | 0.136306 |
| FFAR3     | 19q13.12 | 0.089223 | 0.081576 | 0.136307 |
| CCDC85C   | 14q32.2  | 0.089221 | 0.081583 | 0.136307 |
| SLC28A1   | 15q25.3  | -0.08922 | 0.081589 | 0.136307 |
| SET       | 9q34.11  | -0.08922 | 0.081594 | 0.136307 |
| LINC00917 | 16q24.1  | -0.08922 | 0.081599 | 0.136307 |
| TIMM22    | 17p13.3  | -0.0892  | 0.08164  | 0.136361 |
| TFDP3     | Xq26.2   | 0.089203 | 0.081645 | 0.136361 |
| DCAF8L2   | Xp21.3   | -0.08919 | 0.081677 | 0.136403 |
| CARTPT    | 5q13.2   | 0.089187 | 0.081701 | 0.136432 |
| MON1B     | 16q23.1  | 0.089171 | 0.081754 | 0.136509 |
| UBXN10    | 1p36.12  | -0.08917 | 0.081766 | 0.136517 |
| LMNB1     | 5q23.2   | 0.089158 | 0.081802 | 0.136566 |
| NUDT11    | Xp11.22  | 0.089148 | 0.081835 | 0.136609 |
| FAM220A   | 7p22.1   | -0.08911 | 0.081949 | 0.136789 |
| TSR1      | 17p13.3  | 0.089113 | 0.081957 | 0.13679  |
| ABHD12B   | 14q22.1  | -0.08911 | 0.08198  | 0.136818 |
| LBX2      | 2p13.1   | -0.0891  | 0.081998 | 0.136836 |
| RBMX      | Xq26.3   | -0.08908 | 0.082065 | 0.136937 |
| PPY       | 17q21.31 | 0.08906  | 0.082137 | 0.137045 |

|                 |                     |          |          |          |
|-----------------|---------------------|----------|----------|----------|
| CSF3            | 17q21.1             | -0.08903 | 0.08225  | 0.137223 |
| PNLIPRP3        | 10q25.3             | 0.089025 | 0.082258 | 0.137225 |
| ZFHX4-AS1       | 8q21.13             | 0.089022 | 0.08227  | 0.137233 |
| KCNAB1          | 3q25.31             | 0.089019 | 0.08228  | 0.137238 |
| FRG2C           | 3p12.3              | -0.08901 | 0.082295 | 0.137252 |
| GKN2            | 2p13.3              | 0.088989 | 0.082383 | 0.137388 |
| TRHR            | 8q23.1              | 0.088986 | 0.082392 | 0.137391 |
| ANO7            | 2q37.3              | 0.088973 | 0.082437 | 0.137443 |
| TMEM31          | Xq22.2              | -0.08897 | 0.082443 | 0.137443 |
| LYPD3           | 19q13.31            | -0.08897 | 0.082444 | 0.137443 |
| OR1L8           | 9q33.2              | 0.088929 | 0.082591 | 0.137676 |
| ZSCAN31         | 6p22.1 6p22.3-p22.1 | 0.08892  | 0.082624 | 0.13772  |
| CEACAM4         | 19q13.2             | 0.088917 | 0.082634 | 0.137725 |
| ANKRD40CL       | 17q21.33            | -0.08891 | 0.08264  | 0.137725 |
| DELE1           | 5q31.3              | -0.08891 | 0.082665 | 0.137754 |
| OR5B3           | 11q12.1             | -0.0889  | 0.082674 | 0.137758 |
| PALM2           | 9q31.3              | 0.088891 | 0.082722 | 0.137826 |
| PIAS4           | 19p13.3             | 0.088846 | 0.082879 | 0.138077 |
| CCR10           | 17q21.2             | 0.088829 | 0.082938 | 0.138164 |
| KLLN            | 10q23.31            | 0.088825 | 0.082953 | 0.138176 |
| BEX1            | Xq22.1 Xq22         | 0.088785 | 0.083091 | 0.138396 |
| POLR3GL         | 1q21.1              | 0.088776 | 0.083124 | 0.138438 |
| BCL2L10         | 15q21.2             | -0.08877 | 0.083133 | 0.138442 |
| CLEC18C         | 16q22.1             | -0.08873 | 0.083297 | 0.138704 |
| OLIG3           | 6q23.3              | -0.08868 | 0.083443 | 0.138936 |
| BDKRB1          | 14q32.2             | 0.088676 | 0.083472 | 0.138972 |
| HLX             | 1q41                | 0.088673 | 0.083483 | 0.138978 |
| H2AFY2          | 10q22.1             | -0.08866 | 0.083514 | 0.139019 |
| CRLF2           | Xp22.33 and Yp11.2  | 0.088652 | 0.083556 | 0.139074 |
| MBTPS2          | Xp22.12             | 0.08865  | 0.083564 | 0.139074 |
| GJD4            | 10p11.21            | 0.088648 | 0.083568 | 0.139074 |
| EEF1A1P9        | 4q24                | -0.08863 | 0.083616 | 0.139135 |
| PDXK            | 21q22.3             | -0.08863 | 0.083618 | 0.139135 |
| DUSP8           | 11p15.5             | -0.08859 | 0.083777 | 0.139388 |
| SCARNA20        | 17q23.2             | -0.08858 | 0.083801 | 0.139415 |
| ZNF274          | 19q13.43            | 0.088564 | 0.083864 | 0.139509 |
| PEX12           | 17q12               | 0.088559 | 0.083882 | 0.139528 |
| TRIM49D2        | 11q14.3             | 0.088553 | 0.083903 | 0.139551 |
| SERTAD3         | 19q13.2             | -0.08853 | 0.083973 | 0.139647 |
| PDXDC2P-NPIP14P | 16q22.1             | -0.08853 | 0.083981 | 0.139647 |
| P2RX4           | 12q24.31            | 0.08853  | 0.083982 | 0.139647 |
| GLYATL3         | 6p12.3              | -0.08851 | 0.084045 | 0.139722 |
| CCNA2           | 4q27                | -0.0885  | 0.084072 | 0.139722 |
| VN1R4           | 19q13.42            | -0.0885  | 0.084076 | 0.139722 |
| OR5T3           | 11q12.1             | -0.0885  | 0.084076 | 0.139722 |
| SPINT3          | 20q13.12            | -0.0885  | 0.084076 | 0.139722 |
| OR4A5           | 11q11               | -0.0885  | 0.084076 | 0.139722 |
| KRTAP13-3       | 21q22.11            | -0.0885  | 0.084076 | 0.139722 |
| TMEM252         | 9q21.11             | -0.08849 | 0.084121 | 0.139785 |
| C1ORF94         | 1p35.1              | 0.088472 | 0.084188 | 0.139875 |
| RLIM            | Xq13.2              | 0.088472 | 0.084189 | 0.139875 |
| CRYZL1          | 21q22.11            | 0.088452 | 0.084257 | 0.139977 |
| PRSS37          | 7q34                | 0.088446 | 0.084279 | 0.140002 |
| PPP1R3D         | 20q13.33            | -0.08843 | 0.084343 | 0.140085 |
| ABCE1           | 4q31.21             | -0.08843 | 0.084344 | 0.140085 |
| PDE6G           | 17q25.3             | 0.088421 | 0.084367 | 0.140112 |
| BTBD6           | 14q32.33            | 0.088398 | 0.084448 | 0.140236 |
| HMGCLL1         | 6p12.1              | 0.088365 | 0.084565 | 0.140418 |

|           |          |          |          |          |
|-----------|----------|----------|----------|----------|
| NMB       | 15q25.2  | -0.08836 | 0.084576 | 0.140419 |
| ATP13A4   | 3q29     | 0.088361 | 0.084579 | 0.140419 |
| FKBP1A    | 20p13    | -0.08834 | 0.084665 | 0.140549 |
| MAP4K2    | 11q13.1  | -0.08833 | 0.084695 | 0.140587 |
| RIPPLY1   | Xq22.3   | -0.08832 | 0.084712 | 0.140605 |
| STX2      | 12q24.33 | -0.08828 | 0.084853 | 0.140827 |
| PAPLN     | 14q24.2  | 0.088268 | 0.084907 | 0.140905 |
| ZNF575    | 19q13.31 | 0.088263 | 0.084926 | 0.140924 |
| C3ORF62   | 3p21.31  | 0.088252 | 0.084963 | 0.140974 |
| ARHGAP44  | 17p12    | 0.088244 | 0.084994 | 0.141014 |
| OR2G2     | 1q44     | -0.08824 | 0.085006 | 0.141023 |
| KIR3DX1   | 19q13.42 | 0.088237 | 0.085018 | 0.14103  |
| SATB2     | 2q33.1   | 0.088217 | 0.085088 | 0.141135 |
| CBLN3     | 14q12    | 0.088204 | 0.085134 | 0.141195 |
| HS3ST1    | 4p15.33  | 0.088203 | 0.085139 | 0.141195 |
| DAZL      | 3p24.3   | 0.088166 | 0.085271 | 0.141403 |
| COL18A1   | 21q22.3  | 0.088161 | 0.085289 | 0.141421 |
| ZNF781    | 19q13.12 | 0.08814  | 0.085363 | 0.141532 |
| CLEC4G    | 19p13.2  | 0.088137 | 0.085373 | 0.141536 |
| NMBR      | 6q24.1   | 0.088125 | 0.085417 | 0.141598 |
| SMG1P1    | 16p12.2  | 0.088105 | 0.085487 | 0.141702 |
| DNMT1     | 19p13.2  | 0.088102 | 0.0855   | 0.141712 |
| KRTAP10-3 | 21q22.3  | -0.08808 | 0.085592 | 0.141854 |
| OPRD1     | 1p35.3   | 0.088065 | 0.085631 | 0.141907 |
| OR11G2    | 14q11.2  | -0.08804 | 0.085722 | 0.142046 |
| PARP9     | 3q21.1   | 0.088035 | 0.085737 | 0.142058 |
| KIF19     | 17q25.1  | 0.087996 | 0.085877 | 0.142278 |
| TMEM211   | 22q11.23 | 0.087965 | 0.085989 | 0.142452 |
| ARHGEF10  | 8p23.3   | 0.087933 | 0.086104 | 0.14263  |
| IDUA      | 4p16.3   | -0.08791 | 0.086188 | 0.142758 |
| CDHR3     | 7q22.3   | -0.08789 | 0.086242 | 0.142835 |
| GHRH      | 20q11.23 | -0.08789 | 0.086259 | 0.142852 |
| ARL14     | 3q25.33  | 0.08787  | 0.086328 | 0.142954 |
| CYP4Z1    | 1p33     | -0.08787 | 0.086337 | 0.142958 |
| NRG1      | 8p12     | 0.087865 | 0.086346 | 0.14296  |
| SMIM10L2A | Xq26.3   | -0.08785 | 0.086394 | 0.143028 |
| CUL3      | 2q36.2   | 0.087841 | 0.086431 | 0.143078 |
| CSNK2A1   | 20p13    | 0.08782  | 0.086509 | 0.143195 |
| TYROBP    | 19q13.12 | 0.087812 | 0.086538 | 0.143231 |
| INHBC     | 12q13.3  | 0.087807 | 0.086553 | 0.143245 |
| ZNF169    | 9q22.32  | -0.08779 | 0.086615 | 0.143335 |
| SLC22A2   | 6q25.3   | -0.08779 | 0.086624 | 0.143336 |
| FIG4      | 6q21     | 0.087784 | 0.086637 | 0.143336 |
| E2F5      | 8q21.2   | -0.08778 | 0.086637 | 0.143336 |
| LCLAT1    | 2p23.1   | -0.08777 | 0.086674 | 0.143379 |
| HP        | 16q22.2  | 0.087773 | 0.086677 | 0.143379 |
| TEAD3     | 6p21.31  | -0.08777 | 0.086695 | 0.143396 |
| ZNF227    | 19q13.31 | 0.087751 | 0.086756 | 0.143485 |
| OR52E4    | 11p15.4  | -0.08775 | 0.086778 | 0.143498 |
| MINDY3    | 10p13    | 0.087745 | 0.086778 | 0.143498 |
| CCDC62    | 12q24.31 | 0.087725 | 0.086849 | 0.143592 |
| CAMSAP3   | 19p13.2  | -0.08773 | 0.086849 | 0.143592 |
| PMFBP1    | 16q22.2  | -0.08771 | 0.086903 | 0.143669 |
| DOCK11    | Xq24     | 0.087703 | 0.086931 | 0.143703 |
| PLS3      | Xq23     | 0.087693 | 0.086967 | 0.143751 |
| MOS       | 8q12.1   | -0.08768 | 0.087023 | 0.143832 |
| C11ORF54  | 11q21    | 0.087663 | 0.087073 | 0.143902 |
| SYCP2L    | 6p24.2   | -0.08763 | 0.087209 | 0.144116 |

|           |          |          |          |          |
|-----------|----------|----------|----------|----------|
| TTN       | 2q31.2   | 0.087621 | 0.087225 | 0.144128 |
| PKNOX1    | 21q22.3  | 0.08762  | 0.087231 | 0.144128 |
| ZNF317    | 19p13.2  | 0.087603 | 0.087292 | 0.144217 |
| BTNL8     | 5q35.3   | 0.087585 | 0.087355 | 0.144309 |
| DIS3      | 13q21.33 | -0.08756 | 0.087441 | 0.144435 |
| MAPT      | 17q21.31 | 0.08756  | 0.087446 | 0.144435 |
| CHODL     | 21q21.1  | 0.087553 | 0.087474 | 0.14447  |
| GPR137    | 11q13.1  | -0.08755 | 0.087497 | 0.144489 |
| TMEM109   | 11q12.2  | -0.08755 | 0.0875   | 0.144489 |
| SLC29A4   | 7p22.1   | -0.08752 | 0.087599 | 0.144641 |
| PROX2     | 14q24.3  | 0.087508 | 0.087636 | 0.144689 |
| SCLT1     | 4q28.2   | 0.087498 | 0.087672 | 0.144738 |
| ZNF749    | 19q13.43 | 0.087462 | 0.087804 | 0.144943 |
| MT1X      | 16q13    | -0.08741 | 0.087976 | 0.145216 |
| LAMB4     | 7q31.1   | 0.087395 | 0.088049 | 0.145324 |
| LILRA3    | 19q13.4  | 0.087357 | 0.088185 | 0.145536 |
| GIPR      | 19q13.32 | 0.087334 | 0.08827  | 0.145665 |
| LLGL2     | 17q25.1  | -0.08733 | 0.088281 | 0.145666 |
| TIMP4     | 3p25.2   | -0.08733 | 0.088285 | 0.145666 |
| BNIP5     | 6p21.31  | -0.08733 | 0.088295 | 0.145669 |
| TPSG1     | 16p13.3  | 0.08732  | 0.088321 | 0.145701 |
| TMEM106C  | 12q13.11 | -0.0873  | 0.088411 | 0.145838 |
| POLE      | 12q24.33 | -0.08726 | 0.088524 | 0.146004 |
| ATAD1     | 10q23.31 | 0.087264 | 0.088527 | 0.146004 |
| GH2       | 17q23.3  | -0.08719 | 0.088808 | 0.146455 |
| HPGD      | 4q34.1   | 0.087181 | 0.088832 | 0.146482 |
| HCG4B     | 6p22.1   | -0.08718 | 0.08885  | 0.1465   |
| CTAGE6    | 7q35     | 0.087174 | 0.088858 | 0.146501 |
| PI16      | 6p21.2   | 0.087159 | 0.088912 | 0.146558 |
| MCM2      | 3q21.3   | -0.08716 | 0.088913 | 0.146558 |
| SBSPON    | 8q21.11  | 0.087159 | 0.088914 | 0.146558 |
| FABP3     | 1p35.2   | -0.08715 | 0.08893  | 0.146572 |
| CASC2     | 10q26.11 | -0.08715 | 0.088953 | 0.146598 |
| APOBEC3G  | 22q13.1  | 0.087131 | 0.089017 | 0.146689 |
| FA2H      | 16q23.1  | 0.087129 | 0.089024 | 0.146689 |
| AKR1E2    | 10p15.1  | -0.08713 | 0.08903  | 0.146689 |
| MSX2      | 5q35.2   | -0.0871  | 0.089112 | 0.146812 |
| SP140L    | 2q37.1   | 0.087042 | 0.089342 | 0.147179 |
| GSTA3     | 6p12.2   | -0.08704 | 0.089361 | 0.147199 |
| SINHCAF   | 12p11.21 | -0.08703 | 0.089406 | 0.14726  |
| GALNT9    | 12q24.33 | -0.08702 | 0.089424 | 0.147277 |
| CPXCR1    | Xq21.31  | -0.08701 | 0.089455 | 0.147317 |
| VKORC1L1  | 7q11.21  | 0.087006 | 0.089476 | 0.147339 |
| TMEM11    | 17p11.2  | -0.087   | 0.089486 | 0.147344 |
| ZNF439    | 19p13.2  | -0.08699 | 0.089533 | 0.147409 |
| BAALC-AS2 | 8q22.3   | 0.086976 | 0.089588 | 0.147486 |
| SLC6A1    | 3p25.3   | 0.086963 | 0.089634 | 0.147551 |
| WDR55     | 5q31.3   | 0.08696  | 0.089645 | 0.147557 |
| TRIM45    | 1p13.1   | -0.08695 | 0.08967  | 0.147586 |
| OR2L1P    | 1q44     | 0.086936 | 0.089736 | 0.147683 |
| OC90      | 8q24.22  | -0.08693 | 0.089747 | 0.147689 |
| MAGEC1    | Xq27.2   | -0.08692 | 0.089779 | 0.147729 |
| GP6       | 19q13.42 | 0.086897 | 0.08988  | 0.14788  |
| NUAK2     | 1q32.1   | -0.0869  | 0.089886 | 0.14788  |
| SPRR1B    | 1q21.3   | 0.086892 | 0.089897 | 0.147883 |
| MIF4GD    | 17q25.1  | -0.08689 | 0.089902 | 0.147883 |
| ZFP36L2   | 2p21     | 0.086828 | 0.090138 | 0.148259 |
| CPB1      | 3q24     | 0.086817 | 0.090178 | 0.148299 |

|           |                    |          |          |          |
|-----------|--------------------|----------|----------|----------|
| PTN       | 7q33               | 0.086816 | 0.090181 | 0.148299 |
| LUC7L2    | 7q34               | 0.086815 | 0.090185 | 0.148299 |
| HAUS1     | 18q21.1            | -0.08681 | 0.090193 | 0.1483   |
| TDH       | 8p23.1             | 0.086721 | 0.090535 | 0.148851 |
| RPS27     | 1q21.3             | -0.08665 | 0.090796 | 0.149267 |
| MTURN     | 7p14.3             | -0.08665 | 0.090815 | 0.149283 |
| BMP8B     | 1p34.2             | 0.086645 | 0.090821 | 0.149283 |
| FRMD5     | 15q15.3            | 0.086632 | 0.090867 | 0.14934  |
| PRRT4     | 7q32.1             | -0.08663 | 0.09087  | 0.14934  |
| S100A16   | 1q21.3             | 0.086626 | 0.090891 | 0.149362 |
| DERL1     | 8q24.13            | -0.08662 | 0.090902 | 0.149368 |
| SPATA31D1 | 9q21.32            | -0.0866  | 0.090982 | 0.149487 |
| CHST8     | 19q13.11           | 0.08658  | 0.091061 | 0.149604 |
| TSIX      | Xq13.2             | -0.08658 | 0.091079 | 0.149611 |
| MED21     | 12p11.23           | 0.086575 | 0.09108  | 0.149611 |
| CRYGB     | 2q33.3             | -0.08657 | 0.091104 | 0.149638 |
| EXOC3L2   | 19q13.32           | 0.08655  | 0.091175 | 0.149743 |
| FKBP7     | 2q31.2             | 0.086527 | 0.091262 | 0.149874 |
| TRAFD1    | 12q24.13           | 0.086523 | 0.091278 | 0.149887 |
| CFHR3     | 1q31.3             | 0.086508 | 0.091332 | 0.149964 |
| COL23A1   | 5q35.3             | 0.086468 | 0.091485 | 0.150202 |
| HACE1     | 6q16.3             | 0.086461 | 0.09151  | 0.150224 |
| OR52R1    | 11p15.4            | 0.08646  | 0.091513 | 0.150224 |
| ZNF574    | 19q13.2            | -0.08646 | 0.091524 | 0.150229 |
| MRE11     | 11q21              | -0.08645 | 0.09155  | 0.150248 |
| HAS2      | 8q24.13            | 0.08645  | 0.09155  | 0.150248 |
| LINC02210 | 17q21.31           | -0.08643 | 0.09161  | 0.150335 |
| TM4SF4    | 3q25.1             | 0.086404 | 0.091723 | 0.150507 |
| TNFAIP6   | 2q23.3             | 0.086374 | 0.091837 | 0.150681 |
| SPINT2    | 19q13.2            | -0.08636 | 0.091895 | 0.150764 |
| HNF1B     | 17q12              | 0.086331 | 0.092    | 0.150924 |
| GNRH1     | 8p21.2             | -0.08628 | 0.092179 | 0.151183 |
| RAB11FIP3 | 16p13.3            | -0.08628 | 0.09218  | 0.151183 |
| PDSS2     | 6q21               | 0.086283 | 0.09218  | 0.151183 |
| APOBEC3C  | 22q13.1            | 0.086272 | 0.092223 | 0.15124  |
| SNORA81   | 3q27.3             | -0.08627 | 0.092241 | 0.151258 |
| HLA-B     | 6p21.33            | -0.08625 | 0.092295 | 0.151333 |
| ADH6      | 4q23               | 0.08623  | 0.092382 | 0.151452 |
| TICAM1    | 19p13.3            | 0.08623  | 0.092382 | 0.151452 |
| RPS6KA6   | Xq21.1             | 0.086215 | 0.09244  | 0.151534 |
| NPM2      | 8p21.3             | -0.08621 | 0.092452 | 0.151542 |
| UTP23     | 8q24.11            | -0.0862  | 0.092492 | 0.151582 |
| ROBO4     | 11q24.2            | 0.086199 | 0.092499 | 0.151582 |
| ALDH3A2   | 17p11.2            | 0.086199 | 0.092499 | 0.151582 |
| ARL13A    | Xq22.1             | -0.08619 | 0.092521 | 0.151605 |
| LCE2D     | 1q21.3             | 0.086181 | 0.092569 | 0.15166  |
| SCARNA18  | 5q14.2             | -0.08618 | 0.092569 | 0.15166  |
| ALPI      | 2q37.1             | 0.086144 | 0.09271  | 0.151877 |
| CBR4      | 4q32.3             | -0.08614 | 0.092719 | 0.151879 |
| COX11     | 17q22              | -0.08612 | 0.092784 | 0.151974 |
| BTN1A1    | 6p22.2             | -0.08612 | 0.092805 | 0.151985 |
| KCNV2     | 9p24.2             | -0.08612 | 0.092806 | 0.151985 |
| CREM      | 10p11.21           | -0.08611 | 0.092824 | 0.152003 |
| ADRB3     | 8p11.23            | 0.086074 | 0.092977 | 0.15224  |
| SDHD      | 11q23.1            | -0.08605 | 0.093075 | 0.152388 |
| CSF2RA    | Xp22.33 and Yp11.2 | 0.086041 | 0.093103 | 0.152411 |
| AANAT     | 17q25.1            | -0.08604 | 0.093104 | 0.152411 |
| GGT6      | 17p13.2            | 0.086021 | 0.093178 | 0.15252  |

|           |          |          |          |          |
|-----------|----------|----------|----------|----------|
| BRINP2    | 1q25.2   | 0.086015 | 0.093199 | 0.152541 |
| RNGTT     | 6q15     | 0.08601  | 0.093218 | 0.152561 |
| PRKCI     | 3q26.2   | 0.085988 | 0.093302 | 0.152686 |
| B3GNT8    | 19q13.2  | -0.08597 | 0.093378 | 0.152797 |
| TRO       | Xp11.21  | 0.085955 | 0.093432 | 0.152872 |
| CX3CL1    | 16q21    | 0.08595  | 0.093449 | 0.152888 |
| EFNA3     | 1q21.3   | -0.08595 | 0.09346  | 0.152893 |
| CETP      | 16q13    | 0.085945 | 0.093467 | 0.152893 |
| DNAJC25   | 9q31.3   | -0.08593 | 0.093523 | 0.152972 |
| HAUS3     | 4p16.3   | -0.08593 | 0.093532 | 0.152974 |
| IVL       | 1q21.3   | -0.08592 | 0.093567 | 0.153018 |
| NUBP1     | 16p13.13 | -0.08589 | 0.093665 | 0.153155 |
| OSBPL2    | 20q13.33 | -0.08589 | 0.093666 | 0.153155 |
| PSMD12    | 17q24.2  | -0.08581 | 0.093968 | 0.153637 |
| TBX4      | 17q23.2  | 0.085797 | 0.094035 | 0.153733 |
| IFNLR1    | 1p36.11  | -0.08577 | 0.094151 | 0.153905 |
| BEX2      | Xq22.2   | -0.08577 | 0.094155 | 0.153905 |
| COLGALT1  | 19p13.11 | -0.08575 | 0.094227 | 0.15401  |
| CDK2AP1   | 12q24.31 | 0.085739 | 0.094258 | 0.154049 |
| AVPR1B    | 1q32.1   | 0.085736 | 0.094273 | 0.154059 |
| BPIFA4P   | 20q11.21 | -0.08572 | 0.094348 | 0.154169 |
| ZNF778    | 16q24.3  | 0.085686 | 0.094464 | 0.154348 |
| PROM2     | 2q11.1   | 0.08567  | 0.094526 | 0.154435 |
| ANGPT2    | 8p23.1   | 0.085668 | 0.094534 | 0.154436 |
| GTSE1-DT  | 22q13.31 | -0.08566 | 0.094557 | 0.154462 |
| DNAJC18   | 5q31.2   | 0.085655 | 0.094584 | 0.154493 |
| ZNF420    | 19q13.12 | 0.085642 | 0.094634 | 0.154562 |
| CRTAP     | 3p22.3   | -0.08563 | 0.09468  | 0.154624 |
| SMCO4     | 11q21    | 0.085626 | 0.094697 | 0.15464  |
| SPHK2     | 19q13.33 | -0.08562 | 0.094723 | 0.154657 |
| MIEF1     | 22q13.1  | 0.085619 | 0.094723 | 0.154657 |
| B3GAT1    | 11q25    | 0.085612 | 0.094749 | 0.154687 |
| EEF1AKMT2 | 10q26.13 | -0.0856  | 0.094792 | 0.154744 |
| FAM138F   | 19p13.3  | -0.08558 | 0.09488  | 0.154875 |
| CARD10    | 22q13.1  | 0.08557  | 0.094914 | 0.154908 |
| SPAG5     | 17q11.2  | -0.08557 | 0.094916 | 0.154908 |
| ZNF709    | 19p13.2  | -0.08556 | 0.094946 | 0.154944 |
| DLEC1     | 3p22.2   | 0.085557 | 0.094964 | 0.154961 |
| NOL6      | 9p13.3   | -0.08555 | 0.094972 | 0.154963 |
| ITGB1BP2  | Xq13.1   | -0.08553 | 0.09507  | 0.155103 |
| SNORA24   | 4q26     | -0.08553 | 0.095074 | 0.155103 |
| SIMC1     | 5q35.2   | 0.085519 | 0.095111 | 0.155151 |
| SLC22A17  | 14q11.2  | 0.085515 | 0.095128 | 0.155154 |
| LOC727896 | 18p11.31 | -0.08551 | 0.095129 | 0.155154 |
| KCNJ16    | 17q24.3  | 0.085506 | 0.095162 | 0.155185 |
| ZG16      | 16p11.2  | 0.085505 | 0.095163 | 0.155185 |
| PRR23A    | 3q23     | 0.085465 | 0.09532  | 0.155428 |
| SLC25A4   | 4q35.1   | -0.08542 | 0.095476 | 0.15567  |
| CACFD1    | 9q34.2   | -0.08541 | 0.095548 | 0.155775 |
| C11ORF87  | 11q22.3  | 0.08538  | 0.095651 | 0.155931 |
| MYT1L     | 2p25.3   | 0.085368 | 0.095698 | 0.155994 |
| RABL2A    | 2q14.1   | -0.08534 | 0.095806 | 0.156157 |
| DHX32     | 10q26.2  | 0.08533  | 0.095846 | 0.15621  |
| GRM4      | 6p21.31  | 0.085279 | 0.096046 | 0.156523 |
| TMEM132A  | 11q12.2  | -0.08526 | 0.096118 | 0.156628 |
| SNORA48   | 17p13.1  | -0.08526 | 0.096129 | 0.156633 |
| ABCC13    | 21q11.2  | 0.085248 | 0.096166 | 0.156681 |
| ETHE1     | 19q13.31 | 0.085244 | 0.096181 | 0.156683 |

|                |          |          |          |          |
|----------------|----------|----------|----------|----------|
| PHC2           | 1p35.1   | -0.08524 | 0.096183 | 0.156683 |
| NTN3           | 16p13.3  | -0.08523 | 0.096228 | 0.156743 |
| ZNF277         | 7q31.1   | -0.08522 | 0.096294 | 0.156839 |
| CCDC158        | 4q21.1   | 0.0852   | 0.096357 | 0.156927 |
| DDX5           | 17q23.3  | 0.085196 | 0.096371 | 0.156938 |
| JHY            | 11q24.1  | 0.085194 | 0.096379 | 0.156938 |
| MELK           | 9p13.2   | -0.08518 | 0.096424 | 0.156995 |
| AGAP2-AS1      | 12q14.1  | 0.085181 | 0.096429 | 0.156995 |
| TNIP3          | 4q27     | 0.085173 | 0.096459 | 0.157031 |
| PNPLA2         | 11p15.5  | -0.08516 | 0.096497 | 0.157079 |
| USP21          | 1q23.3   | -0.08515 | 0.096553 | 0.157157 |
| TMEM189-UBE2V1 | 20q13.13 | 0.085141 | 0.096587 | 0.1572   |
| AMIGO2         | 12q13.11 | 0.085135 | 0.09661  | 0.157224 |
| MAST2          | 1p34.1   | -0.08512 | 0.096679 | 0.157324 |
| RNF112         | 17p11.2  | 0.085107 | 0.09672  | 0.157378 |
| HSD52          | 1p32.1   | -0.08509 | 0.096797 | 0.157491 |
| FAM86B2        | 8p23.1   | 0.085078 | 0.096835 | 0.157541 |
| MEDAG          | 13q12.3  | 0.085069 | 0.096869 | 0.157582 |
| HSPA1B         | 6p21.33  | -0.08505 | 0.096937 | 0.157679 |
| ODR4           | 1q31.1   | 0.08504  | 0.096983 | 0.157731 |
| TAS2R60        | 7q35     | 0.08504  | 0.096984 | 0.157731 |
| LINC00336      | 6p21.31  | -0.08504 | 0.096995 | 0.157736 |
| POM121L2       | 6p22.1   | 0.085028 | 0.097031 | 0.157782 |
| SPINK2         | 4q12     | 0.085026 | 0.097042 | 0.157782 |
| DGKB           | 7p21.2   | 0.085024 | 0.097047 | 0.157782 |
| IL11RA         | 9p13.3   | -0.085   | 0.097143 | 0.157925 |
| SPATC1         | 8q24.3   | 0.084942 | 0.097371 | 0.158284 |
| VPS26B         | 11q25    | -0.08494 | 0.09738  | 0.158285 |
| MIER2          | 19p13.3  | -0.08493 | 0.0974   | 0.158304 |
| CACNA2D2       | 3p21.31  | 0.084928 | 0.097426 | 0.158332 |
| GPT            | 8q24.3   | 0.084925 | 0.097437 | 0.158332 |
| PPARG          | 3p25.2   | 0.084924 | 0.097441 | 0.158332 |
| TLE2           | 19p13.3  | -0.08488 | 0.097615 | 0.158602 |
| CHTOP          | 1q21.3   | -0.08485 | 0.097727 | 0.158772 |
| CATSPERZ       | 11q13.1  | -0.08484 | 0.097759 | 0.15881  |
| PSME3          | 17q21.31 | -0.08483 | 0.097796 | 0.158858 |
| GNG10          | 9q31.3   | -0.08483 | 0.097804 | 0.158859 |
| CEP68          | 2p14     | 0.084824 | 0.09784  | 0.158904 |
| ZNF391         | 6p22.1   | 0.08482  | 0.097854 | 0.158913 |
| PCDHA2         | 5q31.3   | 0.084814 | 0.097878 | 0.15894  |
| PRM2           | 16p13.13 | -0.0848  | 0.097936 | 0.159014 |
| DCST2          | 1q21.3   | -0.0848  | 0.09794  | 0.159014 |
| DHH            | 12q13.12 | 0.084765 | 0.098074 | 0.159219 |
| MYL6           | 12q13.2  | -0.08475 | 0.09813  | 0.159298 |
| NUB1           | 7q36.1   | -0.08474 | 0.098191 | 0.159375 |
| LMO7           | 13q22.2  | 0.084735 | 0.098194 | 0.159375 |
| FATE1          | Xq28     | -0.0847  | 0.098325 | 0.159576 |
| DLX4           | 17q21.33 | -0.08464 | 0.098554 | 0.159934 |
| C16ORF46       | 16q23.2  | -0.08463 | 0.098595 | 0.159988 |
| ZNF219         | 14q11.2  | -0.08462 | 0.098645 | 0.160056 |
| ZNF594         | 17p13.2  | 0.084608 | 0.0987   | 0.160132 |
| ARMS2          | 10q26.13 | -0.0846  | 0.098746 | 0.160194 |
| MAFG           | 17q25.3  | -0.08459 | 0.09879  | 0.160252 |
| BRD8           | 5q31.2   | -0.08458 | 0.098802 | 0.160258 |
| DBX2           | 12q12    | 0.08458  | 0.09881  | 0.160259 |
| PSD            | 10q24.32 | 0.084571 | 0.098847 | 0.160298 |
| STK24          | 13q32.2  | -0.08457 | 0.09885  | 0.160298 |
| GATA1          | Xp11.23  | 0.084566 | 0.09887  | 0.160316 |



|           |            |          |          |          |
|-----------|------------|----------|----------|----------|
| RNASE11   | 14q11.2    | -0.08456 | 0.098879 | 0.160318 |
| MXRA8     | 1p36.33    | 0.084553 | 0.098921 | 0.160373 |
| RASSF10   | 11p15.3    | -0.08454 | 0.09896  | 0.160421 |
| SLC3A1    | 2p21       | -0.08454 | 0.098973 | 0.160421 |
| LINC00092 | 9q22.32    | 0.084539 | 0.098974 | 0.160421 |
| LINC01002 | 19p13.3    | -0.08453 | 0.099024 | 0.160488 |
| ADAM29    | 4q34.1     | 0.084522 | 0.099045 | 0.160509 |
| UNQ6494   | 9q22.2     | -0.08452 | 0.099072 | 0.16054  |
| PMAIP1    | 18q21.32   | -0.0845  | 0.099123 | 0.16061  |
| PCBD2     | 5q31.1     | -0.08448 | 0.099196 | 0.160715 |
| ZCWPW1    | 7q22.1     | -0.08448 | 0.099208 | 0.160722 |
| AGTR1     | 3q24       | 0.084466 | 0.099269 | 0.160803 |
| PTPRD     | 9p24.1-p23 | 0.084465 | 0.099274 | 0.160803 |
| TIAL1     | 10q26.11   | -0.08446 | 0.099287 | 0.160811 |
| SHOX2     | 3q25.32    | 0.08445  | 0.099332 | 0.16087  |
| NCR2      | 6p21.1     | 0.084444 | 0.099358 | 0.1609   |
| BGN       | Xq28       | 0.084434 | 0.099398 | 0.160951 |
| DUSP10    | 1q41       | 0.084421 | 0.099449 | 0.161021 |
| IFNB1     | 9p21.3     | -0.08438 | 0.099634 | 0.161308 |
| CPXM2     | 10q26.13   | 0.08437  | 0.099654 | 0.161327 |
| TNFRSF6B  | 20q13.33   | -0.08435 | 0.099732 | 0.16144  |
| SLC22A9   | 11q12.3    | 0.084345 | 0.099756 | 0.161465 |
| GHRL      | 3p25.3     | 0.084334 | 0.099801 | 0.161525 |
| H1FO      | 22q13.1    | 0.084316 | 0.099872 | 0.161627 |
| C9ORF170  | 9q21.33    | 0.084313 | 0.099886 | 0.161637 |
| LRP4      | 11p11.2    | 0.084306 | 0.099913 | 0.161667 |
| CCDC13    | 3p22.1     | 0.084294 | 0.099963 | 0.161735 |
| HSPB1P1   | 9q21.13    | -0.08429 | 0.099971 | 0.161735 |
| LINC00467 | 1q32.3     | -0.08427 | 0.10006  | 0.161866 |
| TM9SF2    | 13q32.3    | 0.084261 | 0.100096 | 0.161912 |
| TAP1      | 6p21.32    | -0.08425 | 0.100121 | 0.161938 |
| LINC02203 | 15q11.2    | 0.084245 | 0.100161 | 0.16199  |
| NEK11     | 3q22.1     | 0.084237 | 0.100191 | 0.162026 |
| CFAP61    | 20p11.23   | 0.084234 | 0.100205 | 0.162035 |
| LRP2      | 2q31.1     | -0.08422 | 0.100256 | 0.162104 |
| OR2AG1    | 11p15.4    | -0.08418 | 0.100409 | 0.162338 |
| UAP1L1    | 9q34.3     | -0.08412 | 0.10068  | 0.162764 |
| CRABP2    | 1q23.1     | -0.08408 | 0.100815 | 0.162959 |
| CACNG8    | 19q13.42   | -0.08408 | 0.100823 | 0.162959 |
| HOXB3     | 17q21.32   | 0.084081 | 0.100825 | 0.162959 |
| UOX       | 1p31.1     | -0.08404 | 0.10099  | 0.163213 |
| CPT2      | 1p32.3     | 0.083991 | 0.10119  | 0.163511 |
| MTCL1     | 18p11.22   | 0.083991 | 0.101191 | 0.163511 |
| PGM2      | 4p14       | 0.083965 | 0.101296 | 0.163668 |
| OTOAP1    | 16p12.2    | -0.08396 | 0.101325 | 0.163701 |
| EDA       | Xq13.1     | -0.08396 | 0.101338 | 0.163708 |
| DECR1     | 8q21.3     | -0.08395 | 0.101375 | 0.163756 |
| RWDD4     | 4q35.1     | -0.08394 | 0.101389 | 0.163765 |
| TBC1D25   | Xp11.23    | -0.08393 | 0.101423 | 0.163806 |
| C2ORF27A  | 2q21.2     | -0.08393 | 0.101451 | 0.163838 |
| MS4A13    | 11q12.2    | -0.08392 | 0.101483 | 0.163872 |
| EPYC      | 12q21.33   | 0.083918 | 0.101488 | 0.163872 |
| CAPZA1    | 1p13.2     | 0.083902 | 0.101556 | 0.163968 |
| MUCL3     | 6p21.33    | 0.083899 | 0.101565 | 0.16397  |
| ZAR1L     | 13q13.1    | -0.08388 | 0.101638 | 0.164074 |
| SCARNA14  | 15q22.31   | -0.08386 | 0.101735 | 0.164216 |
| SNORA40   | 11q21      | -0.08386 | 0.101742 | 0.164216 |
| KHDC1L    | 6q13       | -0.08384 | 0.101816 | 0.164314 |

|              |                |          |          |          |
|--------------|----------------|----------|----------|----------|
| SMG1P5       | 16p11.2        | -0.08384 | 0.101819 | 0.164314 |
| DIDO1        | 20q13.33       | -0.08383 | 0.101836 | 0.164326 |
| TPH2         | 12q21.1        | -0.08383 | 0.101843 | 0.164326 |
| RNFT1        | 17q23.1        | -0.08382 | 0.101896 | 0.164398 |
| FKTN         | 9q31.2         | 0.083781 | 0.102051 | 0.164635 |
| LINC02433    | 4q32.1         | -0.08378 | 0.102065 | 0.164637 |
| CCDC178      | 18q12.1        | 0.083776 | 0.102069 | 0.164637 |
| ATPAF1       | 1p33           | -0.08376 | 0.102118 | 0.164703 |
| SNX14        | 6q14.3         | 0.083754 | 0.102162 | 0.164754 |
| HCG22        | 6p21.33        | 0.083753 | 0.102166 | 0.164754 |
| PTPN3        | 9q31.3         | 0.083737 | 0.102231 | 0.164845 |
| ANKLE1       | 19p13.11       | -0.08372 | 0.102282 | 0.164915 |
| SMCO2        | 12p11.23       | -0.08366 | 0.102562 | 0.165326 |
| ARSH         | Xp22.33        | 0.083655 | 0.102569 | 0.165326 |
| KAT14        | 20p11.23       | -0.08365 | 0.10257  | 0.165326 |
| TINAGL1      | 1p35.2         | -0.08365 | 0.10257  | 0.165326 |
| ANGPTL5      | 11q22.1        | -0.08365 | 0.102609 | 0.165375 |
| CFAP44       | 3q13.2         | -0.08363 | 0.102661 | 0.165446 |
| LRRC37A      | 17q21.31       | -0.08363 | 0.102675 | 0.165455 |
| MRPL44       | 2q36.1         | -0.08363 | 0.102687 | 0.16546  |
| ISCA1        | 9q21.33        | -0.08362 | 0.102705 | 0.165476 |
| PPP1R2B      | 5q33.3         | 0.08361  | 0.102754 | 0.165542 |
| MAP6         | 11q13.5        | 0.083608 | 0.102762 | 0.165542 |
| REEP1        | 2p11.2         | -0.0836  | 0.102789 | 0.165572 |
| HBQ1         | 16p13.3        | -0.08357 | 0.102901 | 0.16574  |
| EHBP1L1      | 11q13.1        | 0.083565 | 0.10294  | 0.165789 |
| PCDHA10      | 5q31.3         | 0.083547 | 0.103017 | 0.165898 |
| PLK1         | 16p12.2        | -0.08354 | 0.103034 | 0.165912 |
| KIF25        | 6q27           | -0.08352 | 0.103135 | 0.166062 |
| ALG6         | 1p31.3         | -0.08351 | 0.103157 | 0.166085 |
| ZFAND5       | 9q21.13        | 0.083489 | 0.103255 | 0.166228 |
| KBTBD8       | 3p14.1         | 0.083484 | 0.103275 | 0.166248 |
| GPR180       | 13q32.1        | -0.08347 | 0.103351 | 0.166357 |
| GRM6         | 5q35.3         | 0.083455 | 0.103396 | 0.166416 |
| C17ORF80     | 17q25.1        | -0.08343 | 0.103503 | 0.166574 |
| LMNB2        | 19p13.3        | -0.08342 | 0.103545 | 0.166629 |
| PLCD4        | 2q35           | 0.083416 | 0.103557 | 0.166629 |
| MAVS         | 20p13          | 0.083415 | 0.103562 | 0.166629 |
| RYR3         | 15q13.3-q14    | 0.083402 | 0.103618 | 0.166706 |
| HOXB1        | 17q21.32       | 0.083378 | 0.103715 | 0.166849 |
| LCN10        | 9q34.3         | 0.083359 | 0.103795 | 0.166954 |
| CD8A         | 2p11.2         | 0.083358 | 0.103797 | 0.166954 |
| HIST1H1D     | 6p22.2         | -0.08335 | 0.103818 | 0.166974 |
| APOL4        | 22q12.3        | 0.083333 | 0.103904 | 0.167087 |
| PLCH2        | 1p36.32        | 0.083333 | 0.103905 | 0.167087 |
| RAB40A       | Xq22.2         | 0.083314 | 0.103981 | 0.167186 |
| PNPLA5       | 22q13.31       | -0.08331 | 0.103983 | 0.167186 |
| TBX21        | 17q21.32       | 0.08329  | 0.104081 | 0.167329 |
| TMEM125      | 1p34.2         | -0.08328 | 0.10412  | 0.167379 |
| TTLL11       | 9q33.2         | -0.08326 | 0.104225 | 0.167535 |
| SLC6A11      | 3p25.3         | 0.08325  | 0.10425  | 0.167556 |
| KIR3DL2      | 19q13.42       | 0.083249 | 0.104255 | 0.167556 |
| SCHIP1       | 3q25.32-q25.33 | 0.083231 | 0.104327 | 0.167657 |
| SLC26A8      | 6p21.31        | 0.08323  | 0.104334 | 0.167657 |
| SPDL1        | 5q35.1         | -0.08321 | 0.10443  | 0.167797 |
| GLP1R        | 6p21.2         | 0.083205 | 0.104439 | 0.167798 |
| ARMH3        | 10q24.32       | 0.083195 | 0.104479 | 0.167848 |
| LOC100130264 | 20p11.23       | 0.083132 | 0.104741 | 0.168255 |

|            |          |          |          |          |
|------------|----------|----------|----------|----------|
| STH        | 17q21.31 | -0.08313 | 0.10476  | 0.168272 |
| DLGAP4     | 20q11.23 | -0.08312 | 0.104786 | 0.168302 |
| NXPB2      | 2q22.1   | 0.083097 | 0.104888 | 0.168451 |
| COL28A1    | 7p21.3   | -0.08308 | 0.104975 | 0.168578 |
| SAMD4B     | 19q13.2  | 0.083066 | 0.105019 | 0.168636 |
| VGFB       | 7q22.1   | -0.08306 | 0.105043 | 0.16866  |
| TRIM67     | 1q42.2   | 0.083048 | 0.105096 | 0.168718 |
| SELE       | 1q24.2   | 0.083048 | 0.105096 | 0.168718 |
| PIWIL1     | 12q24.33 | -0.08304 | 0.105111 | 0.168728 |
| ERBB4      | 2q34     | 0.08303  | 0.105172 | 0.168813 |
| TTC5       | 14q11.2  | 0.083016 | 0.105228 | 0.16889  |
| TMEM182    | 2q12.1   | 0.083013 | 0.105242 | 0.168898 |
| MUSTN1     | 3p21.1   | -0.083   | 0.105276 | 0.16893  |
| GOLGA7     | 8p11.21  | -0.083   | 0.105281 | 0.16893  |
| JPT2       | 16p13.3  | -0.083   | 0.105287 | 0.16893  |
| ACSM6      | 10q23.33 | 0.082984 | 0.105364 | 0.169015 |
| PARP14     | 3q21.1   | 0.082984 | 0.105366 | 0.169015 |
| TM4SF5     | 17p13.2  | -0.08298 | 0.10537  | 0.169015 |
| NPHS1      | 19q13.12 | 0.082982 | 0.105374 | 0.169015 |
| NORAD      | 20q11.23 | -0.08296 | 0.105465 | 0.169148 |
| TBC1D15    | 12q21.1  | 0.082949 | 0.105513 | 0.169211 |
| MT1G       | 16q13    | -0.08294 | 0.105566 | 0.169282 |
| OR2Z1      | 19p13.2  | 0.082929 | 0.105598 | 0.16932  |
| OR51E1     | 11p15.4  | 0.082918 | 0.105642 | 0.169377 |
| GRK1       | 13q34    | -0.0829  | 0.10573  | 0.169499 |
| ATP2B1-AS1 | 12q21.33 | 0.082896 | 0.105735 | 0.169499 |
| SUPT3H     | 6p21.1   | -0.08289 | 0.105779 | 0.169556 |
| KLK13      | 19q13.41 | 0.082883 | 0.105791 | 0.169562 |
| TAS1R3     | 1p36.33  | 0.082876 | 0.105818 | 0.169592 |
| NR4A1      | 12q13.13 | 0.082863 | 0.105874 | 0.169667 |
| HIST1H2BC  | 6p22.2   | 0.082843 | 0.105961 | 0.169793 |
| OVOL2      | 20p11.23 | 0.08283  | 0.106014 | 0.169858 |
| TBCD       | 17q25.3  | -0.08283 | 0.106024 | 0.169858 |
| SDHA       | 5p15.33  | 0.082827 | 0.106027 | 0.169858 |
| KDELR1     | 19q13.33 | -0.08281 | 0.106119 | 0.169983 |
| ZCCHC3     | 20p13    | -0.0828  | 0.106121 | 0.169983 |
| TTC13      | 1q42.2   | 0.082802 | 0.106134 | 0.16999  |
| ACSBG1     | 15q25.1  | 0.082794 | 0.106165 | 0.170025 |
| DLEU7      | 13q14.3  | 0.08277  | 0.106268 | 0.170176 |
| IER3IP1    | 18q21.1  | 0.082762 | 0.106301 | 0.170216 |
| RPL23AP32  | 2p16.2   | -0.08275 | 0.106334 | 0.170255 |
| SLC2A1     | 1p34.2   | -0.08275 | 0.106362 | 0.170287 |
| EZH1       | 17q21.2  | -0.08274 | 0.106378 | 0.170298 |
| UBE2B      | 5q31.1   | -0.08274 | 0.106404 | 0.170311 |
| SMC4       | 3q25.33  | 0.082736 | 0.106413 | 0.170311 |
| RAP1GAP2   | 17p13.3  | 0.082734 | 0.106419 | 0.170311 |
| GLE1       | 9q34.11  | -0.08273 | 0.10642  | 0.170311 |
| GAGE12D    | Xp11.23  | -0.08273 | 0.106452 | 0.170349 |
| ZBED9      | 6p22.1   | 0.08272  | 0.10648  | 0.17038  |
| CENPQ      | 6p12.3   | -0.08271 | 0.106512 | 0.170418 |
| NOS2       | 17q11.2  | 0.082692 | 0.106599 | 0.170543 |
| EBLN2      | 3p13     | 0.082684 | 0.106633 | 0.170584 |
| CLEC4C     | 12p13.31 | 0.082677 | 0.106663 | 0.170618 |
| RHOF       | 12q24.31 | 0.082672 | 0.106682 | 0.170636 |
| TARP       | 7p14.1   | 0.082642 | 0.106811 | 0.170827 |
| LVRN       | 5q23.1   | 0.082638 | 0.10683  | 0.170844 |
| HPR        | 16q22.2  | 0.08263  | 0.106865 | 0.170886 |
| PCTP       | 17q22    | -0.08262 | 0.106908 | 0.170941 |

|           |                     |          |          |          |
|-----------|---------------------|----------|----------|----------|
| ACAT1     | 11q22.3             | -0.08261 | 0.106943 | 0.170985 |
| FAM43A    | 3q29                | -0.08261 | 0.106959 | 0.170996 |
| GRHL1     | 2p25.1              | 0.082585 | 0.107055 | 0.171128 |
| PRDM13    | 6q16.2              | -0.08258 | 0.107059 | 0.171128 |
| SUPT20HL1 | Xp22.11             | 0.082574 | 0.1071   | 0.171168 |
| MYL1      | 2q34                | -0.08257 | 0.1071   | 0.171168 |
| MEP1B     | 18q12.1             | 0.082549 | 0.107206 | 0.171323 |
| RDH12     | 14q24.1             | -0.08254 | 0.107234 | 0.171354 |
| INTS8     | 8q22.1              | -0.08254 | 0.107258 | 0.171378 |
| LINC01098 | 4q34.3              | -0.08253 | 0.107285 | 0.171408 |
| TADA3     | 3p25.3              | -0.08252 | 0.107315 | 0.171441 |
| ADAM2     | 8p11.22             | -0.08251 | 0.10736  | 0.1715   |
| CIR1      | 2q31.1              | -0.08248 | 0.107515 | 0.17173  |
| LIPE      | 19q13.2             | -0.08248 | 0.107521 | 0.17173  |
| KLHL13    | Xq24                | 0.082472 | 0.107538 | 0.171744 |
| OR4K1     | 14q11.2             | 0.082464 | 0.107572 | 0.171771 |
| NUDT12    | 5q21.2              | 0.082464 | 0.107572 | 0.171771 |
| SYP       | Xp11.23             | -0.08244 | 0.107688 | 0.171941 |
| ADIPOR2   | 12p13.33            | 0.082422 | 0.107752 | 0.172028 |
| ZNF599    | 19q13.11            | -0.08242 | 0.107763 | 0.172028 |
| TWIST2    | 2q37.3              | 0.082418 | 0.107767 | 0.172028 |
| SECTM1    | 17q25.3             | 0.082404 | 0.10783  | 0.172113 |
| HCG11     | 6p22.2              | 0.082389 | 0.107895 | 0.172204 |
| SPEM2     | 17p13.1             | -0.08231 | 0.108238 | 0.172737 |
| LCE6A     | 1q21.3              | -0.0823  | 0.108259 | 0.172758 |
| CEBPG     | 19q13.11            | -0.08226 | 0.108445 | 0.17304  |
| PIM3      | 22q13.33            | -0.08223 | 0.108594 | 0.173265 |
| FRRS1L    | 9q31.3              | 0.082223 | 0.108607 | 0.173271 |
| C4ORF47   | 4q35.1              | -0.0822  | 0.108703 | 0.17341  |
| LRRRC37A2 | 17q21.31            | -0.0822  | 0.108715 | 0.173416 |
| ASCL1     | 12q23.2             | -0.08218 | 0.108787 | 0.1735   |
| COL21A1   | 6p12.1 6p12.3-p11.2 | 0.08218  | 0.108794 | 0.1735   |
| CRSP8P    | 5q14.1              | -0.08218 | 0.108794 | 0.1735   |
| VCX3B     | Xp22.31             | -0.08216 | 0.108879 | 0.173622 |
| SMIM3     | 5q33.1              | 0.082156 | 0.108898 | 0.173639 |
| LHX2      | 9q33.3              | 0.082111 | 0.109092 | 0.173935 |
| PUS10     | 2p16.1-p15          | -0.08211 | 0.109114 | 0.173944 |
| PANX3     | 11q24.2             | -0.08211 | 0.109116 | 0.173944 |
| CCL23     | 17q12               | 0.082103 | 0.109125 | 0.173946 |
| SRPX      | Xp11.4              | 0.082101 | 0.109136 | 0.173948 |
| LOC145783 | 15q21.3             | -0.08208 | 0.109209 | 0.174052 |
| ZSWIM4    | 19p13.13-p13.12     | 0.082077 | 0.109236 | 0.174081 |
| TAF7L     | Xq22.1              | -0.08206 | 0.1093   | 0.174168 |
| CD74      | 5q33.1              | 0.082041 | 0.109393 | 0.174303 |
| VWA1      | 1p36.33             | -0.08203 | 0.109442 | 0.174366 |
| TST       | 22q12.3             | -0.08202 | 0.109495 | 0.174437 |
| SLC35G6   | 17p13.1             | 0.081998 | 0.109582 | 0.174563 |
| LINC01559 | 12p13.1             | 0.081991 | 0.10961  | 0.174593 |
| CABYR     | 18q11.2             | -0.08197 | 0.109716 | 0.174739 |
| TCL1B     | 14q32.13            | 0.081966 | 0.109719 | 0.174739 |
| SMARCAD1  | 4q22.3              | 0.081961 | 0.109743 | 0.174763 |
| VCX       | Xp22.31             | -0.08196 | 0.109756 | 0.174769 |
| YWHAG     | 7q11.23             | 0.081952 | 0.109782 | 0.174798 |
| GATAD1    | 7q21.2              | -0.08194 | 0.10984  | 0.174875 |
| GSDMA     | 17q21.1             | 0.081934 | 0.10986  | 0.174894 |
| DQX1      | 2p13.1              | 0.081931 | 0.109872 | 0.174899 |
| CLU       | 8p21.1              | 0.081925 | 0.109899 | 0.174928 |
| MS4A15    | 11q12.2             | -0.08192 | 0.109911 | 0.174934 |

|           |                |          |          |          |
|-----------|----------------|----------|----------|----------|
| ZNF485    | 10q11.21       | -0.08191 | 0.109942 | 0.174969 |
| MEG8      | 14q32.2-q32.31 | -0.08191 | 0.109959 | 0.174983 |
| LINC01091 | 4q28.1         | -0.08189 | 0.110058 | 0.175126 |
| SETD1A    | 16p11.2        | -0.08188 | 0.110082 | 0.17515  |
| CYP2C9    | 10q23.33       | 0.081879 | 0.110098 | 0.175162 |
| IRS4      | Xq22.3         | 0.08187  | 0.110138 | 0.175212 |
| PPIAP80   | 7p15.1         | -0.08187 | 0.110154 | 0.175214 |
| TRPC1     | 3q23           | 0.081866 | 0.110157 | 0.175214 |
| MAP3K10   | 19q13.2        | -0.08185 | 0.110242 | 0.175336 |
| PGA4      | 11q12.2        | 0.081821 | 0.11035  | 0.175492 |
| OR5E1P    | 11p15.4        | -0.08181 | 0.110387 | 0.175538 |
| DCAF17    | 2q31.1         | 0.081811 | 0.110397 | 0.175539 |
| BPIFC     | 22q12.3        | -0.08178 | 0.11055  | 0.17577  |
| DEFB109A  | 8p23.1         | -0.08175 | 0.110665 | 0.175938 |
| SLFN14    | 17q12          | 0.081711 | 0.110832 | 0.176189 |
| ALOX12B   | 17p13.1        | 0.081707 | 0.110852 | 0.176198 |
| GAST      | 17q21.2        | -0.08171 | 0.110855 | 0.176198 |
| SYCN      | 19q13.2        | -0.0817  | 0.110883 | 0.176228 |
| C11ORF53  | 11q23.1        | 0.081696 | 0.110899 | 0.17624  |
| CNTFR     | 9p13.3         | -0.08165 | 0.111089 | 0.176528 |
| IPW       | 15q11.2        | 0.081634 | 0.11117  | 0.176642 |
| DCTN5     | 16p12.2        | -0.08162 | 0.11123  | 0.176724 |
| TBCCD1    | 3q27.3         | 0.081602 | 0.11131  | 0.176837 |
| CUL7      | 6p21.1         | 0.081594 | 0.111349 | 0.17687  |
| FAM131A   | 3q27.1         | -0.08159 | 0.111349 | 0.17687  |
| CRAT      | 9q34.11        | 0.081581 | 0.111402 | 0.17694  |
| STRA8     | 7q33           | -0.08158 | 0.111425 | 0.176963 |
| TEX11     | Xq13.1         | 0.081545 | 0.11156  | 0.177164 |
| SNORA11D  | Xp11.22        | -0.08153 | 0.111607 | 0.177224 |
| MMP26     | 11p15.4        | 0.081523 | 0.111659 | 0.177293 |
| GALNT11   | 7q36.1 7q36.1  | -0.08152 | 0.111684 | 0.177319 |
| IL36G     | 2q14.1         | -0.0815  | 0.111746 | 0.177403 |
| LOC730101 | 6p12.2         | -0.0815  | 0.111782 | 0.177446 |
| ZNF479    | 7p11.2         | -0.08149 | 0.111823 | 0.177496 |
| HPN       | 19q13.11       | 0.081484 | 0.111831 | 0.177496 |
| ROBO1     | 3p12.3         | 0.081477 | 0.111861 | 0.177529 |
| PCSK7     | 11q23.3        | 0.08146  | 0.111936 | 0.177634 |
| HOXD12    | 2q31.1         | 0.081457 | 0.111948 | 0.17764  |
| TMEM267   | 5p12           | -0.08144 | 0.112027 | 0.177751 |
| TGM4      | 3p21.31        | 0.081436 | 0.112044 | 0.177764 |
| LSMEM2    | 3p21.31        | -0.08143 | 0.112091 | 0.177824 |
| PNMA6A    | Xq28           | 0.081422 | 0.112107 | 0.177834 |
| UGT1A1    | 2q37.1         | 0.081407 | 0.112171 | 0.177922 |
| EBF4      | 20p13          | 0.081373 | 0.112323 | 0.178149 |
| HID1      | 17q25.1        | 0.081364 | 0.112363 | 0.17819  |
| PDHB      | 3p14.3         | -0.08136 | 0.112366 | 0.17819  |
| DSG1      | 18q12.1        | -0.08136 | 0.11239  | 0.178214 |
| TRIM34    | 11p15.4        | 0.081327 | 0.112526 | 0.178414 |
| PRRC2A    | 6p21.33        | 0.081307 | 0.112616 | 0.178544 |
| KIRREL2   | 19q13.12       | 0.081302 | 0.112636 | 0.178561 |
| ADAMTS10  | 19p13.2        | 0.081279 | 0.11274  | 0.178712 |
| SLA2      | 20q11.23       | 0.081276 | 0.11275  | 0.178714 |
| SYCE3     | 22q13.33       | -0.08127 | 0.112784 | 0.178753 |
| LTB       | 6p21.33        | 0.081267 | 0.112793 | 0.178754 |
| ZNF746    | 7q36.1         | -0.08126 | 0.112806 | 0.178759 |
| SLC5A10   | 17p11.2        | 0.08122  | 0.113001 | 0.179054 |
| OR52B4    | 11p15.4        | 0.081177 | 0.113193 | 0.179337 |
| NR5A1     | 9q33.3         | -0.08118 | 0.113197 | 0.179337 |

|           |          |          |          |          |
|-----------|----------|----------|----------|----------|
| RASGEF1C  | 5q35.3   | 0.08116  | 0.11327  | 0.179438 |
| TTC39C    | 18q11.2  | -0.08113 | 0.113421 | 0.179663 |
| PIP4P1    | 14q11.2  | -0.08109 | 0.113576 | 0.179894 |
| SH3TC2    | 5q32     | 0.081054 | 0.113742 | 0.180144 |
| ADH5      | 4q23     | -0.08104 | 0.113816 | 0.180232 |
| IL5       | 5q31.1   | -0.08104 | 0.113823 | 0.180232 |
| SLC35E2B  | 1p36.33  | -0.08104 | 0.113825 | 0.180232 |
| PKD2L1    | 10q24.31 | 0.081021 | 0.113889 | 0.180318 |
| CLEC12B   | 12p13.2  | 0.08101  | 0.113939 | 0.180385 |
| GEMIN2    | 14q21.1  | -0.081   | 0.113966 | 0.180412 |
| PRY2      | Yq11.223 | 0.081001 | 0.11398  | 0.180421 |
| MANCR     | 10p15.1  | 0.080994 | 0.114008 | 0.180436 |
| KRTAP4-8  | 17q21.2  | -0.08099 | 0.114008 | 0.180436 |
| UPF1      | 19p13.11 | 0.080982 | 0.114062 | 0.180508 |
| SOGA3     | 6q22.33  | 0.080973 | 0.114106 | 0.180563 |
| MLLT6     | 17q12    | -0.08096 | 0.114142 | 0.180606 |
| ZNF525    | 19q13.42 | -0.08095 | 0.11419  | 0.180666 |
| FOSB      | 19q13.32 | 0.080942 | 0.114245 | 0.180727 |
| ZNF445    | 3p21.31  | 0.080941 | 0.114246 | 0.180727 |
| CCNC      | 6q16.2   | -0.08093 | 0.114293 | 0.180786 |
| OR2B11    | 1q44     | 0.080927 | 0.11431  | 0.180799 |
| OR52I1    | 11p15.4  | 0.080915 | 0.114362 | 0.180868 |
| PPP1R2    | 3q29     | -0.08088 | 0.11452  | 0.181103 |
| ODAM      | 4q13.3   | 0.080878 | 0.114529 | 0.181103 |
| MYOM3     | 1p36.11  | -0.08085 | 0.114656 | 0.18129  |
| PRMT2     | 21q22.3  | 0.080829 | 0.11475  | 0.181424 |
| GSTM4     | 1p13.3   | -0.0808  | 0.114886 | 0.181624 |
| LRG1      | 19p13.3  | 0.080795 | 0.114905 | 0.181628 |
| HLA-F     | 6p22.1   | -0.08079 | 0.114906 | 0.181628 |
| NOP14-AS1 | 4p16.3   | -0.08076 | 0.115063 | 0.181858 |
| BSND      | 1p32.3   | 0.080757 | 0.115075 | 0.181858 |
| SLC11A1   | 2q35     | 0.080756 | 0.115079 | 0.181858 |
| SMARCD3   | 7q36.1   | -0.08075 | 0.115089 | 0.181859 |
| AKAP11    | 13q14.11 | 0.080749 | 0.115114 | 0.181884 |
| PPP1R3G   | 6p25.1   | 0.080716 | 0.115263 | 0.182105 |
| SLC12A4   | 16q22.1  | 0.080707 | 0.1153   | 0.182149 |
| TUBGCP3   | 13q34    | -0.0807  | 0.115348 | 0.182203 |
| RLBP1     | 15q26.1  | 0.080696 | 0.115352 | 0.182203 |
| C2ORF16   | 2p23.3   | 0.080672 | 0.115462 | 0.182362 |
| PPP1R21   | 2p16.3   | 0.080645 | 0.11558  | 0.182535 |
| GPR22     | 7q22.3   | -0.08064 | 0.115592 | 0.182539 |
| RAB36     | 22q11.23 | -0.08063 | 0.115641 | 0.182601 |
| MTAP      | 9p21.3   | -0.08063 | 0.115653 | 0.182607 |
| RGS6      | 14q24.2  | 0.08062  | 0.115696 | 0.182661 |
| CRISP3    | 6p12.3   | -0.08061 | 0.115719 | 0.182682 |
| LINC00303 | 1q32.1   | 0.080612 | 0.115732 | 0.182689 |
| SECISBP2  | 9q22.2   | -0.08061 | 0.11575  | 0.182702 |
| KRTAP27-1 | 21q22.11 | 0.080606 | 0.11576  | 0.182704 |
| DCK       | 4q13.3   | 0.080601 | 0.115781 | 0.182722 |
| KCNMB2    | 3q26.32  | 0.080584 | 0.115857 | 0.182828 |
| NFKB2     | 10q24.32 | 0.080581 | 0.115872 | 0.182837 |
| SLC22A6   | 11q12.3  | -0.08054 | 0.116038 | 0.183084 |
| PGAM1     | 10q24.1  | 0.080531 | 0.1161   | 0.183167 |
| LRP11     | 6q25.1   | -0.08051 | 0.116202 | 0.183315 |
| ZNF8      | 19q13.43 | 0.080496 | 0.116259 | 0.183339 |
| LIMS3     | 2q13     | 0.080482 | 0.116324 | 0.183478 |
| ID3       | 1p36.12  | -0.08048 | 0.116337 | 0.183483 |
| ADGRA1    | 10q26.3  | 0.080472 | 0.116367 | 0.183517 |

|           |                 |          |          |          |
|-----------|-----------------|----------|----------|----------|
| E2F7      | 12q21.2         | 0.080462 | 0.116414 | 0.183577 |
| IZUMO1R   | 11q21           | 0.080437 | 0.116527 | 0.183741 |
| CLDN11    | 3q26.2          | 0.080424 | 0.116587 | 0.18382  |
| PELO      | 5q11.2          | 0.080373 | 0.116818 | 0.184169 |
| RACGAP1P  | 12q12           | -0.08034 | 0.11696  | 0.184356 |
| MAGED2    | Xp11.21         | -0.08034 | 0.116961 | 0.184356 |
| C1QTNF1   | 17q25.3         | -0.08034 | 0.11697  | 0.184356 |
| OCIAD1    | 4p11            | -0.08034 | 0.116973 | 0.184356 |
| POLD3     | 11q13.4         | 0.080283 | 0.11723  | 0.184746 |
| GTF3C3    | 2q33.1          | 0.080248 | 0.11739  | 0.184984 |
| NR1I3     | 1q23.3          | -0.08025 | 0.117404 | 0.184992 |
| RALB      | 2q14.2          | 0.08024  | 0.117428 | 0.185016 |
| SLC25A31  | 4q28.1          | -0.08022 | 0.117524 | 0.185139 |
| CTSF      | 11q13.2         | -0.08022 | 0.117525 | 0.185139 |
| KRTAP4-5  | 17q21.2         | -0.0802  | 0.117615 | 0.185266 |
| TNNT3     | 11p15.5         | 0.080192 | 0.117646 | 0.185298 |
| KAAG1     | 6p22.3          | -0.08019 | 0.117653 | 0.185298 |
| SLC7A9    | 19q13.11        | -0.08016 | 0.117807 | 0.185525 |
| CST13P    | 20p11.21        | -0.08015 | 0.117838 | 0.185556 |
| DPP9      | 19p13.3         | -0.08015 | 0.117845 | 0.185556 |
| NAP1L5    | 4q22.1 4q21-q22 | 0.080125 | 0.117957 | 0.185717 |
| KCTD19    | 16q22.1         | -0.08012 | 0.117976 | 0.185732 |
| OR9G4     | 11q12.1         | -0.08003 | 0.118394 | 0.186376 |
| CLN5      | 13q22.3         | -0.08003 | 0.118411 | 0.186388 |
| SPATA31E1 | 9q22.1          | 0.08002  | 0.118438 | 0.186416 |
| L3MBTL4   | 18p11.31        | -0.07999 | 0.118566 | 0.186602 |
| KREMEN1   | 22q12.1         | 0.079989 | 0.118584 | 0.186616 |
| SLC51B    | 15q22.31        | -0.07998 | 0.118639 | 0.186674 |
| SNHG29    | 17p11.2         | -0.07998 | 0.118639 | 0.186674 |
| SLC22A16  | 6q21 6q21-q22.1 | 0.079974 | 0.118651 | 0.186678 |
| PWRN2     | 15q11.2         | -0.07994 | 0.11882  | 0.186926 |
| PEX6      | 6p21.1          | -0.07994 | 0.118828 | 0.186926 |
| CNGB1     | 16q21           | 0.079913 | 0.118932 | 0.187076 |
| LOC91450  | 15q24.3         | -0.07991 | 0.118943 | 0.187078 |
| LINC00608 | 2q35            | -0.07989 | 0.119038 | 0.187213 |
| ENOX2     | Xq26.1          | -0.07983 | 0.119309 | 0.187626 |
| CBLN1     | 16q12.1         | -0.07981 | 0.119389 | 0.187736 |
| SLC2A9    | 4p16.1          | -0.07981 | 0.119415 | 0.187763 |
| CCDC38    | 12q23.1         | 0.079807 | 0.119426 | 0.187765 |
| ZNF582    | 19q13.43        | 0.079804 | 0.119441 | 0.187773 |
| APOH      | 17q24.2         | -0.07979 | 0.119486 | 0.18783  |
| LINC01226 | 1p35.2          | -0.07979 | 0.119519 | 0.187866 |
| USH1G     | 17q25.1         | 0.079776 | 0.119571 | 0.187934 |
| GALNT6    | 12q13.13        | 0.07977  | 0.119598 | 0.187961 |
| MUC21     | 6p21.33         | -0.07976 | 0.119628 | 0.187983 |
| FAM118B   | 11q24.2         | 0.079763 | 0.119631 | 0.187983 |
| TAS2R30   | 12p13.2         | -0.07975 | 0.119708 | 0.18809  |
| GRXCR2    | 5q32            | 0.079738 | 0.119747 | 0.188136 |
| MID1IP1   | Xp11.4          | -0.07972 | 0.119814 | 0.188227 |
| TRIM9     | 14q22.1         | 0.079716 | 0.119852 | 0.188271 |
| NSUN2     | 5p15.31         | -0.07971 | 0.11987  | 0.188286 |
| DBIL5P    | 17p13.3         | 0.079706 | 0.119897 | 0.188313 |
| PCNP      | 3q12.3          | 0.079704 | 0.119907 | 0.188314 |
| HIST1H2BH | 6p22.2          | -0.0797  | 0.119921 | 0.188321 |
| POTED     | 21q11.2         | -0.0797  | 0.119937 | 0.188331 |
| IFNA7     | 9p21.3          | 0.079677 | 0.120034 | 0.188468 |
| NUP98     | 11p15.4         | 0.079673 | 0.120049 | 0.188477 |
| AP5S1     | 20p13           | -0.07967 | 0.120084 | 0.188518 |

|            |          |          |          |          |
|------------|----------|----------|----------|----------|
| RPGR       | Xp11.4   | -0.07966 | 0.120111 | 0.188546 |
| ZNF785     | 16p11.2  | -0.07965 | 0.12016  | 0.188608 |
| SNORA3A    | 11p15.4  | -0.07964 | 0.120207 | 0.188654 |
| CDK13      | 7p14.1   | 0.079639 | 0.120209 | 0.188654 |
| ACAN       | 15q26.1  | 0.079622 | 0.120288 | 0.188762 |
| POLN       | 4p16.3   | -0.07962 | 0.120296 | 0.188762 |
| PLSCR5     | 3q24     | -0.0796  | 0.120393 | 0.188899 |
| GPR89A     | 1q21.1   | -0.07959 | 0.120415 | 0.188919 |
| GP9        | 3q21.3   | 0.079587 | 0.120451 | 0.188961 |
| KIFC1      | 6p21.32  | -0.07958 | 0.120491 | 0.189009 |
| GTF2IRD2B  | 7q11.23  | 0.079574 | 0.120514 | 0.189029 |
| CCDC112    | 5q22.3   | 0.07956  | 0.120577 | 0.189107 |
| ABTB2      | 11p13    | 0.079559 | 0.120582 | 0.189107 |
| PYY        | 17q21.31 | 0.079539 | 0.120676 | 0.189238 |
| KRT8       | 12q13.13 | -0.07954 | 0.120692 | 0.189238 |
| E2F8       | 11p15.1  | 0.079535 | 0.120694 | 0.189238 |
| LST1       | 6p21.33  | 0.079529 | 0.120721 | 0.189266 |
| FOXD4L5    | 9q21.11  | 0.079516 | 0.120786 | 0.189352 |
| PSMF1      | 20p13    | -0.07951 | 0.120814 | 0.189382 |
| PTPRN      | 2q35     | 0.079502 | 0.120851 | 0.189418 |
| APOBEC3H   | 22q13.1  | 0.079501 | 0.120856 | 0.189418 |
| OR7A10     | 19p13.12 | -0.0795  | 0.120876 | 0.189434 |
| PPM1E      | 17q22    | -0.07948 | 0.120935 | 0.189512 |
| CBLN2      | 18q22.3  | 0.079478 | 0.120964 | 0.189543 |
| UMODL1-AS1 | 21q22.3  | 0.079447 | 0.121108 | 0.189754 |
| FOXJ1      | 17q25.1  | -0.07944 | 0.121129 | 0.189772 |
| TMOD1      | 9q22.33  | -0.07944 | 0.12116  | 0.189805 |
| PHEX       | Xp22.11  | 0.079431 | 0.121182 | 0.189825 |
| CBR3       | 21q22.12 | 0.079426 | 0.121206 | 0.189846 |
| CCZ1B      | 7p22.1   | -0.07942 | 0.121214 | 0.189846 |
| NUDT4      | 12q22    | 0.079421 | 0.121229 | 0.189855 |
| C2ORF49    | 2q12.2   | -0.07942 | 0.121248 | 0.189868 |
| NOMO1      | 16p13.11 | 0.079414 | 0.121265 | 0.18988  |
| OTOP2      | 17q25.1  | 0.079407 | 0.121295 | 0.189912 |
| MLN        | 6p21.31  | 0.079371 | 0.121467 | 0.190168 |
| HMOX1      | 22q12.3  | 0.079353 | 0.121552 | 0.190286 |
| HTR5A      | 7q36.2   | -0.07935 | 0.121568 | 0.190296 |
| TGM1       | 14q12    | -0.07934 | 0.121616 | 0.190356 |
| ZBTB24     | 6q21     | 0.079331 | 0.121655 | 0.190402 |
| SLC16A3    | 17q25.3  | 0.079327 | 0.121673 | 0.190416 |
| DSE        | 6q22.1   | 0.079301 | 0.121796 | 0.190593 |
| PRSS42P    | 3p21.31  | -0.0793  | 0.121812 | 0.190603 |
| SLC2A7     | 1p36.23  | 0.079294 | 0.12183  | 0.190616 |
| NUDT9P1    | 10q23.32 | -0.07929 | 0.121866 | 0.190658 |
| ZNF844     | 19p13.2  | 0.079275 | 0.121916 | 0.190721 |
| OR1L6      | 9q33.2   | 0.079246 | 0.122053 | 0.19092  |
| KCNJ11     | 11p15.1  | -0.07924 | 0.122098 | 0.190976 |
| FBXO36     | 2q36.3   | -0.07922 | 0.12217  | 0.191074 |
| C11ORF40   | 11p15.4  | -0.07921 | 0.122216 | 0.191131 |
| DDX1       | 2p24.3   | -0.0792  | 0.122259 | 0.191182 |
| PLPP4      | 10q26.12 | 0.0792   | 0.122273 | 0.191182 |
| NAF1       | 4q32.2   | 0.079199 | 0.122277 | 0.191182 |
| PPP1R1B    | 17q12    | -0.07919 | 0.122316 | 0.191227 |
| IL20RB     | 3q22.3   | -0.07914 | 0.122535 | 0.191555 |
| BCYRN1     | 2p21     | -0.07913 | 0.122593 | 0.191631 |
| ANKRD27    | 19q13.11 | -0.07913 | 0.122612 | 0.191645 |
| ADM        | 11p15.4  | 0.079125 | 0.122629 | 0.191657 |
| CTNNA3     | 10q21.3  | 0.079115 | 0.122676 | 0.191715 |



|           |               |          |          |          |
|-----------|---------------|----------|----------|----------|
| SOWAHD    | Xq24          | -0.07911 | 0.122714 | 0.191759 |
| GJA5      | 1q21.2        | 0.079103 | 0.122732 | 0.191773 |
| MC4R      | 18q21.32      | 0.0791   | 0.122746 | 0.19178  |
| HBE1      | 11p15.4       | -0.07909 | 0.122807 | 0.191859 |
| RTP4      | 3q27.3        | 0.079068 | 0.122899 | 0.191989 |
| NPC1L1    | 7p13          | -0.07906 | 0.122934 | 0.192028 |
| TSPAN2    | 1p13.2        | 0.079024 | 0.123107 | 0.192283 |
| CHMP7     | 8p21.3        | 0.079    | 0.123221 | 0.192447 |
| VN1R5     | 1q44          | 0.078992 | 0.123259 | 0.192491 |
| TSKU      | 11q13.5       | -0.07899 | 0.123273 | 0.192497 |
| UBLCP1    | 5q33.3        | 0.078987 | 0.123286 | 0.192503 |
| GPI       | 19q13.11      | -0.07896 | 0.12343  | 0.192714 |
| SEC14L1P1 | 11p11.2       | 0.078949 | 0.123465 | 0.192753 |
| OR4N2     | 14q11.2       | -0.07894 | 0.123498 | 0.192789 |
| COMP      | 19p13.11      | 0.078929 | 0.123561 | 0.192872 |
| LTB4R     | 14q12         | -0.07892 | 0.123599 | 0.19291  |
| HNRNPA0   | 5q31.2        | 0.07892  | 0.123604 | 0.19291  |
| ANGEL1    | 14q24.3       | -0.07889 | 0.123758 | 0.19313  |
| RBMS1     | 2q24.2        | 0.078886 | 0.123764 | 0.19313  |
| TXNRD2    | 22q11.21      | -0.07886 | 0.123884 | 0.193301 |
| SLC16A12  | 10q23.31      | 0.078846 | 0.123955 | 0.193398 |
| CFAP157   | 9q34.11       | -0.07884 | 0.123984 | 0.193427 |
| HAUS4     | 14q11.2       | -0.07881 | 0.124124 | 0.193631 |
| TCTN3     | 10q24.1       | 0.078791 | 0.124222 | 0.193768 |
| ETAA1     | 2p14          | 0.078786 | 0.124242 | 0.193785 |
| ZNF112    | 19q13.31      | 0.078761 | 0.124366 | 0.193963 |
| GTF2A2    | 15q22.2       | 0.07875  | 0.124416 | 0.194025 |
| OR2AK2    | 1q44          | 0.078747 | 0.124429 | 0.194031 |
| TMEM143   | 19q13.33      | -0.07874 | 0.124468 | 0.194069 |
| AQP10     | 1q21.3        | 0.078738 | 0.124472 | 0.194069 |
| VASN      | 16p13.3       | 0.078722 | 0.124553 | 0.194179 |
| GATA6     | 18q11.2       | 0.078678 | 0.124761 | 0.194488 |
| RHAG      | 6p12.3        | 0.078674 | 0.124783 | 0.194503 |
| AGFG2     | 7q22.1        | 0.078672 | 0.12479  | 0.194503 |
| ZNF578    | 19q13.41      | 0.07867  | 0.1248   | 0.194504 |
| SHANK2    | 11q13.3-q13.4 | 0.078663 | 0.124835 | 0.194543 |
| URI1      | 19q12         | -0.07866 | 0.124849 | 0.194549 |
| MBOAT7    | 19q13.42      | -0.07865 | 0.124879 | 0.194581 |
| TRHDE-AS1 | 12q21.1       | 0.078647 | 0.124912 | 0.194604 |
| CTRC      | 1p36.21       | -0.07865 | 0.124913 | 0.194604 |
| FCN2      | 9q34.3        | -0.07862 | 0.125063 | 0.194822 |
| TYW5      | 2q33.1        | -0.07861 | 0.125095 | 0.194858 |
| KCNG3     | 2p21          | 0.078593 | 0.125172 | 0.194962 |
| SYN1      | Xp11.3-p11.23 | 0.07859  | 0.125186 | 0.194968 |
| SOSTDC1   | 7p21.2        | 0.078578 | 0.125245 | 0.195045 |
| ABCB7     | Xq13.3        | -0.07857 | 0.125299 | 0.1951   |
| C1ORF100  | 1q44          | 0.078566 | 0.1253   | 0.1951   |
| FNIP1     | 5q31.1        | 0.078549 | 0.125383 | 0.195215 |
| LARP6     | 15q23         | -0.07853 | 0.125454 | 0.195309 |
| NUF2      | 1q23.3        | -0.07852 | 0.125501 | 0.195369 |
| SRGAP3    | 3p25.3        | 0.078514 | 0.12555  | 0.195429 |
| RNF215    | 22q12.2       | -0.07851 | 0.125571 | 0.195447 |
| DCAF4L2   | 8q21.3        | -0.07847 | 0.125744 | 0.195692 |
| CCDC170   | 6q25.1        | -0.07847 | 0.125748 | 0.195692 |
| TARS2     | 1q21.2        | 0.078452 | 0.12585  | 0.195835 |
| SYT8      | 11p15.5       | -0.07843 | 0.125937 | 0.195955 |
| PGA3      | 11q12.2       | 0.078432 | 0.125949 | 0.195958 |
| FOXL2NB   | 3q22.3        | 0.078417 | 0.126024 | 0.19606  |

|            |                |          |          |          |
|------------|----------------|----------|----------|----------|
| FAM53B     | 10q26.13       | 0.078396 | 0.126121 | 0.196196 |
| GABPB1-IT1 | 15q21.2        | 0.078376 | 0.12622  | 0.196335 |
| DLX2       | 2q31.1         | -0.07837 | 0.126244 | 0.196357 |
| ALX4       | 11p11.2        | -0.07836 | 0.126302 | 0.196431 |
| RAB15      | 14q23.3        | -0.07834 | 0.126382 | 0.196536 |
| ASAP1      | 8q24.21-q24.22 | 0.078341 | 0.126388 | 0.196536 |
| USP45      | 6q16.2         | -0.07832 | 0.126469 | 0.196646 |
| KLHDC7B    | 22q13.33       | 0.078284 | 0.126668 | 0.19694  |
| NTAN1      | 16p13.11       | 0.078266 | 0.126755 | 0.197059 |
| RAC1       | 7p22.1         | -0.07825 | 0.126814 | 0.197137 |
| DCLRE1A    | 10q25.3        | 0.078234 | 0.126912 | 0.197273 |
| BLID       | 11q24.1        | 0.078223 | 0.126964 | 0.197338 |
| OLIG2      | 21q22.11       | 0.078216 | 0.126999 | 0.197367 |
| GGTLC2     | 22q11.22       | -0.07822 | 0.127002 | 0.197367 |
| HPYR1      | 8q24.22        | 0.078201 | 0.127069 | 0.197456 |
| LLGL1      | 17p11.2        | 0.078196 | 0.127097 | 0.197483 |
| MYH16      | 7q22.1         | 0.078183 | 0.127161 | 0.197568 |
| FBN3       | 19p13.2        | -0.07817 | 0.127218 | 0.197642 |
| TMEM94     | 17q25.1        | -0.07817 | 0.12724  | 0.197655 |
| ST3GAL6    | 3q12.1         | 0.078165 | 0.127247 | 0.197655 |
| INIP       | 9q32           | 0.078155 | 0.127294 | 0.197714 |
| LOC728392  | 17p13.2        | 0.078145 | 0.127345 | 0.197761 |
| WDR19      | 4p14           | -0.07815 | 0.127345 | 0.197761 |
| ACLY       | 17q21.2        | 0.078137 | 0.127381 | 0.1978   |
| KRTAP5-7   | 11q13.4        | -0.07814 | 0.127389 | 0.1978   |
| SNCAIP     | 5q23.2         | 0.078133 | 0.127406 | 0.19781  |
| SRRM1      | 1p36.11        | 0.078116 | 0.127488 | 0.197922 |
| LRRTM3     | 10q21.3        | 0.078113 | 0.127503 | 0.197931 |
| WFDC6      | 20q13.12       | 0.078055 | 0.127785 | 0.198348 |
| LAMA5      | 20q13.33       | 0.078054 | 0.127792 | 0.198348 |
| CSH2       | 17q23.3        | -0.07805 | 0.127813 | 0.198366 |
| XRRA1      | 11q13.4        | -0.07804 | 0.127849 | 0.198406 |
| UBA1       | Xp11.3         | -0.07804 | 0.127876 | 0.198433 |
| IL1RAPL1   | Xp21.3-p21.2   | 0.078023 | 0.12794  | 0.198516 |
| FLJ13224   | 12p11.21       | -0.07801 | 0.127991 | 0.198577 |
| CLEC4F     | 2p13.3         | 0.078011 | 0.127999 | 0.198577 |
| MC2R       | 18p11.21       | 0.077989 | 0.128108 | 0.198713 |
| PID1       | 2q36.3         | 0.077989 | 0.128111 | 0.198713 |
| CA5B       | Xp22.2         | 0.077986 | 0.128121 | 0.198713 |
| ELAVL2     | 9p21.3         | -0.07799 | 0.128126 | 0.198713 |
| PATE3      | 11q24.2        | -0.07798 | 0.128152 | 0.198738 |
| CPB2       | 13q14.13       | -0.07793 | 0.128411 | 0.199124 |
| CFL1P1     | 10q23.31       | -0.07792 | 0.128439 | 0.199152 |
| FAM160B2   | 8p21.3         | 0.077917 | 0.128461 | 0.19917  |
| EEPDP1     | 7p14.2         | -0.07789 | 0.128585 | 0.199347 |
| RAB6A      | 11q13.4        | 0.077874 | 0.128675 | 0.199471 |
| FBXO22-AS1 | 15q24.2        | -0.07785 | 0.128809 | 0.199664 |
| MCOLN3     | 1p22.3         | 0.077832 | 0.12888  | 0.199755 |
| LINC02591  | 1q21.1         | 0.077831 | 0.128888 | 0.199755 |
| MSLNL      | 16p13.3        | -0.07782 | 0.128916 | 0.199783 |
| FAM74A1    | 9p12           | -0.07782 | 0.128935 | 0.199797 |
| LOC553137  | 6q21           | -0.07781 | 0.128972 | 0.199839 |
| TRIM35     | 8p21.2         | 0.07781  | 0.128988 | 0.199848 |
| SEMA5B     | 3q21.1         | 0.077801 | 0.129033 | 0.199903 |
| CHST1      | 11p11.2        | 0.077756 | 0.129256 | 0.200226 |
| H2BFWT     | Xq22.2         | -0.07775 | 0.129262 | 0.200226 |
| OR51G2     | 11p15.4        | 0.077751 | 0.12928  | 0.200227 |
| ZNF177     | 19p13.2        | -0.07775 | 0.129282 | 0.200227 |

|             |            |          |          |          |
|-------------|------------|----------|----------|----------|
| NTSR1       | 20q13.33   | 0.077739 | 0.129339 | 0.200299 |
| UBXN2A      | 2p23.3     | 0.077735 | 0.129361 | 0.200318 |
| CXCL3       | 4q13.3     | -0.07772 | 0.129421 | 0.200396 |
| ADPRHL1     | 13q34      | -0.07769 | 0.129578 | 0.20062  |
| CALY        | 10q26.3    | 0.077689 | 0.129586 | 0.20062  |
| SMPX        | Xp22.12    | -0.07769 | 0.129603 | 0.200629 |
| GRN         | 17q21.31   | 0.077684 | 0.129612 | 0.200629 |
| NAP1L6      | Xq13.2     | 0.077677 | 0.129645 | 0.200665 |
| VSX1        | 20p11.21   | 0.077656 | 0.12975  | 0.200812 |
| FANK1       | 10q26.2    | -0.07765 | 0.129796 | 0.200866 |
| BATF        | 14q24.3    | -0.07764 | 0.129805 | 0.200866 |
| BBS7        | 4q27       | 0.077638 | 0.12984  | 0.200905 |
| DARS        | 2q21.3     | -0.07763 | 0.12986  | 0.200919 |
| DSCAML1     | 11q23.3    | 0.077621 | 0.129922 | 0.201001 |
| ZCCHC4      | 4p15.2     | -0.07762 | 0.129936 | 0.201001 |
| DLGAP2      | 8p23.3     | 0.077617 | 0.129943 | 0.201001 |
| TBC1D13     | 9q34.11    | -0.07759 | 0.130055 | 0.201147 |
| TDGF1       | 3p21.31    | -0.07759 | 0.130057 | 0.201147 |
| POTEM       | 14q11.2    | 0.077581 | 0.130123 | 0.201234 |
| HES3        | 1p36.31    | -0.07757 | 0.130154 | 0.201267 |
| KCNN4       | 19q13.31   | 0.077551 | 0.130272 | 0.201433 |
| PIGM        | 1q23.2     | 0.077531 | 0.130369 | 0.201568 |
| DLGAP5      | 14q22.3    | 0.077494 | 0.130557 | 0.201842 |
| LINC00882   | 3q13.12    | 0.077464 | 0.130704 | 0.202054 |
| MMP15       | 16q21      | -0.07746 | 0.130719 | 0.202061 |
| NOD2        | 16q12.1    | -0.07744 | 0.1308   | 0.202164 |
| MYH3        | 17p13.1    | -0.07744 | 0.130805 | 0.202164 |
| EVPLL       | 17p11.2    | 0.077433 | 0.130859 | 0.202231 |
| KLHL40      | 3p22.1     | -0.07742 | 0.130917 | 0.202305 |
| CLPSL1      | 6p21.31    | -0.07741 | 0.130992 | 0.202405 |
| SDCBP2      | 20p13      | 0.077371 | 0.131169 | 0.202663 |
| HOOK2       | 19p13.13   | -0.07736 | 0.131239 | 0.202719 |
| OR2L8       | 1q44       | -0.07736 | 0.13124  | 0.202719 |
| MBD3L1      | 19p13.2    | 0.077354 | 0.131255 | 0.202719 |
| KRTAP19-8   | 21q22.11   | 0.077354 | 0.131255 | 0.202719 |
| TEX47       | 7q21.13    | 0.077354 | 0.131255 | 0.202719 |
| STAT5A      | 17q21.2    | 0.077347 | 0.13129  | 0.202746 |
| TGM6        | 20p13      | -0.07735 | 0.131293 | 0.202746 |
| GCGR        | 17q25.3    | -0.07733 | 0.131392 | 0.202883 |
| ATP6V1H     | 8q11.23    | -0.07732 | 0.131406 | 0.202888 |
| AGPAT5      | 8p23.1     | 0.077314 | 0.131454 | 0.202948 |
| HEATR4      | 14q24.3    | 0.077284 | 0.131605 | 0.203154 |
| ARAP3       | 5q31.3     | 0.077283 | 0.131608 | 0.203154 |
| POTEF       | 2q21.1     | -0.07727 | 0.131665 | 0.203225 |
| HNRNPU-AS1  | -          | -0.07726 | 0.131704 | 0.203262 |
| PLXNB3      | Xq28       | 0.077263 | 0.131709 | 0.203262 |
| RETREG2     | 2q35       | -0.07726 | 0.131743 | 0.2033   |
| MAST3       | 19p13.11   | 0.07721  | 0.131977 | 0.203644 |
| HLA-DOB     | 6p21.32    | 0.077177 | 0.132143 | 0.203885 |
| CCDC183-AS1 | 9q34.3     | -0.07717 | 0.132175 | 0.203918 |
| L1CAM       | Xq28       | -0.07716 | 0.132218 | 0.20397  |
| IRAK1BP1    | 6q14.1     | -0.07716 | 0.132245 | 0.203995 |
| CHRNA9      | 4p14       | 0.077132 | 0.132365 | 0.204165 |
| SELENOV     | 19q13.2    | -0.07713 | 0.132399 | 0.204168 |
| SOX30       | 5q33.3     | 0.077124 | 0.132406 | 0.204168 |
| EDARADD     | 1q42.3-q43 | -0.07712 | 0.132407 | 0.204168 |
| AADA2L2     | 3q25.1     | 0.077124 | 0.132408 | 0.204168 |
| KCNIP3      | 2q11.1     | -0.07707 | 0.1327   | 0.204603 |

|            |               |          |          |          |
|------------|---------------|----------|----------|----------|
| OR9I1      | 11q12.1       | 0.077049 | 0.132784 | 0.204716 |
| ATP6V1G2   | 6p21.33       | 0.077044 | 0.132809 | 0.204739 |
| FIRRE      | Xq26.2        | -0.07703 | 0.132858 | 0.204799 |
| MFSD11     | 17q25.1-q25.2 | 0.077028 | 0.132889 | 0.204831 |
| FNDC9      | 5q33.3        | 0.077023 | 0.132918 | 0.204859 |
| MARS2      | 2q33.1        | -0.07701 | 0.132986 | 0.204949 |
| SLC26A7    | 8q21.3        | 0.076999 | 0.133036 | 0.20501  |
| HOXD3      | 2q31.1        | 0.076985 | 0.133108 | 0.205104 |
| PROKR1     | 2p13.3        | 0.076981 | 0.133127 | 0.205104 |
| JPH3       | 16q24.2       | 0.076981 | 0.133131 | 0.205104 |
| GLRX       | 5q15          | 0.076979 | 0.133138 | 0.205104 |
| SDHC       | 1q23.3        | 0.07697  | 0.133185 | 0.205161 |
| RAB2B      | 14q11.2       | 0.076958 | 0.133246 | 0.205239 |
| EGR4       | 2p13.2        | 0.076948 | 0.133296 | 0.2053   |
| WASHC5     | 8q24.13       | 0.076941 | 0.133331 | 0.205338 |
| PLA2G2F    | 1p36.12       | -0.07692 | 0.133429 | 0.205473 |
| SLC7A4     | 22q11.21      | -0.07691 | 0.133495 | 0.205551 |
| FZD6       | 8q22.3        | 0.076908 | 0.1335   | 0.205551 |
| SLIT1      | 10q24.1       | -0.0769  | 0.133537 | 0.205592 |
| SDC3       | 1p35.2        | 0.076893 | 0.133572 | 0.20563  |
| GOLGA6L9   | 15q25.2       | -0.07689 | 0.1336   | 0.205658 |
| GAS2L1P2   | 9q22.33       | 0.076867 | 0.133706 | 0.205805 |
| C1GALT1C1L | 2p21          | -0.07685 | 0.133782 | 0.205907 |
| SLC12A8    | 3q21.2        | 0.07685  | 0.133794 | 0.20591  |
| CDKN1C     | 11p15.4       | -0.07685 | 0.133805 | 0.205911 |
| CYFIP2     | 5q33.3        | 0.07684  | 0.133843 | 0.205952 |
| PSG6       | 19q13.31      | -0.07683 | 0.133881 | 0.205995 |
| BAIAP2-DT  | 17q25.3       | 0.076825 | 0.133921 | 0.206041 |
| ZNF254     | 19p12         | 0.07682  | 0.133946 | 0.206044 |
| EEF1A1     | 6q13          | -0.07682 | 0.133955 | 0.206044 |
| GPD1L      | 3p22.3        | 0.076817 | 0.133961 | 0.206044 |
| REG3G      | 2p12          | -0.07682 | 0.133964 | 0.206044 |
| ZNF30      | 19q13.11      | -0.0768  | 0.134041 | 0.206147 |
| RFPL4B     | 6q21          | 0.076789 | 0.1341   | 0.206221 |
| CRYGA      | 2q33.3        | -0.07678 | 0.134128 | 0.206249 |
| TRIM59     | 3q25.33       | 0.076759 | 0.134256 | 0.20643  |
| LINC00313  | 21q22.3       | -0.07675 | 0.134313 | 0.206502 |
| IGLL3P     | 22q11.23      | -0.07671 | 0.134482 | 0.206746 |
| LINC02731  | 11q25         | 0.076698 | 0.134567 | 0.20686  |
| TNMD       | Xq22.1        | -0.0767  | 0.134577 | 0.20686  |
| PYDC2      | 3q28          | -0.07669 | 0.134618 | 0.206907 |
| MGC15885   | 15q22.2       | 0.076645 | 0.134834 | 0.207224 |
| ZBED3      | 5q13.3        | 0.076642 | 0.134853 | 0.207236 |
| RUNX2      | 6p21.1        | 0.076599 | 0.135071 | 0.207555 |
| COL16A1    | 1p35.2        | 0.076582 | 0.135157 | 0.207668 |
| SMIM13     | 6p24.2        | 0.07658  | 0.135165 | 0.207668 |
| POPDC2     | 3q13.33       | 0.076572 | 0.135207 | 0.207716 |
| EPGN       | 4q13.3        | -0.07655 | 0.135308 | 0.207856 |
| SAFB       | 19p13.3       | -0.07653 | 0.135446 | 0.208052 |
| RHCG       | 15q26.1       | -0.07651 | 0.135516 | 0.208143 |
| RAB7A      | 3q21.3        | -0.0765  | 0.135563 | 0.2082   |
| DNTT       | 10q24.1       | 0.076436 | 0.135905 | 0.208709 |
| SGCZ       | 8p22          | 0.076427 | 0.13595  | 0.208762 |
| PRAMEF16   | 1p36.21       | -0.07642 | 0.135965 | 0.208768 |
| PHOX2A     | 11q13.4       | 0.076378 | 0.136202 | 0.209117 |
| KLK14      | 19q13.41      | -0.07637 | 0.136256 | 0.209183 |
| ZNF280A    | 22q11.22      | -0.07635 | 0.136368 | 0.20934  |
| RNF122     | 8p12          | 0.076321 | 0.136496 | 0.209519 |

|           |               |          |          |          |
|-----------|---------------|----------|----------|----------|
| SLC17A7   | 19q13.33      | 0.076287 | 0.136672 | 0.209774 |
| MRPS27    | 5q13.2        | -0.07627 | 0.136751 | 0.209879 |
| IL9R      | Xq28 and Yq12 | 0.076253 | 0.136847 | 0.21001  |
| CSF2      | 5q31.1        | -0.07625 | 0.136886 | 0.210054 |
| TSG101    | 11p15.1       | -0.07624 | 0.136903 | 0.210064 |
| TENT4A    | 5p15.31       | -0.07624 | 0.136918 | 0.210071 |
| SLC25A34  | 1p36.21       | 0.076236 | 0.136934 | 0.210073 |
| CEP170B   | 14q32.33      | 0.076234 | 0.136944 | 0.210073 |
| PHYKPL    | 5q35.3        | -0.07623 | 0.136951 | 0.210073 |
| TM4SF1    | 3q25.1        | 0.076224 | 0.136996 | 0.210126 |
| ID4       | 6p22.3        | 0.076215 | 0.137042 | 0.210181 |
| ASXL3     | 18q12.1       | 0.07616  | 0.137329 | 0.210604 |
| IDH3A     | 15q25.1       | 0.076145 | 0.137405 | 0.210706 |
| DACH1     | 13q21.33      | -0.07612 | 0.13751  | 0.21085  |
| MC3R      | 20q13.2       | -0.0761  | 0.137614 | 0.210993 |
| C19ORF44  | 19p13.11      | -0.0761  | 0.137659 | 0.211046 |
| FAM83F    | 22q13.1       | -0.07609 | 0.137688 | 0.211074 |
| LRRC17    | 7q22.1        | 0.076073 | 0.137779 | 0.211198 |
| XIRP2     | 2q24.3        | 0.076064 | 0.137824 | 0.211251 |
| OLFML3    | 1p13.2        | 0.076058 | 0.137857 | 0.211286 |
| YAP1      | 11q22.1       | 0.076053 | 0.137884 | 0.211311 |
| MVP       | 16p11.2       | 0.076043 | 0.137936 | 0.211373 |
| A1BG      | 19q13.43      | -0.07601 | 0.138104 | 0.211614 |
| TMEM50A   | 1p36.11       | -0.07599 | 0.138217 | 0.211771 |
| COL4A6    | Xq22.3        | 0.075986 | 0.138231 | 0.211777 |
| HOPX      | 4q12          | 0.075961 | 0.138359 | 0.211951 |
| OR10X1    | 1q23.1        | -0.07596 | 0.138368 | 0.211951 |
| KLK7      | 19q13.41      | -0.07596 | 0.138376 | 0.211951 |
| SLC9C2    | 1q25.1        | 0.07593  | 0.138521 | 0.212155 |
| HADH      | 4q25          | -0.07593 | 0.13853  | 0.212155 |
| TMC3      | 15q25.1       | 0.07592  | 0.138575 | 0.212207 |
| ADAL      | 15q15.3       | 0.075906 | 0.138648 | 0.212302 |
| ANKUB1    | 3q25.1        | 0.075889 | 0.138737 | 0.212423 |
| DNAI1     | 9p13.3        | -0.07587 | 0.138842 | 0.212559 |
| MAGEA12   | Xq28          | -0.07587 | 0.138847 | 0.212559 |
| RRM2      | 2p25.1        | -0.07585 | 0.138952 | 0.212702 |
| TMEM132E  | 17q12         | 0.075839 | 0.138998 | 0.212757 |
| ZNF140    | 12q24.33      | -0.07582 | 0.13912  | 0.212928 |
| ADORA2A   | 22q11.23      | 0.075796 | 0.139224 | 0.21307  |
| AQP8      | 16p12.1       | 0.075793 | 0.139237 | 0.213074 |
| RAD23B    | 9q31.2        | 0.075766 | 0.139378 | 0.213274 |
| UGT1A6    | 2q37.1        | -0.07576 | 0.139437 | 0.213347 |
| TRPM8     | 2q37.1        | 0.075738 | 0.139527 | 0.213469 |
| WDR43     | 2p23.2        | -0.07573 | 0.139578 | 0.213531 |
| KLHL26    | 19p13.11      | 0.075724 | 0.139598 | 0.213545 |
| ZYX       | 7q34          | -0.07572 | 0.139646 | 0.213602 |
| TESK2     | 1p34.1        | 0.075658 | 0.139945 | 0.21402  |
| KCNG1     | 20q13.13      | 0.075657 | 0.13995  | 0.21402  |
| PCNAP1    | 4q23          | 0.075657 | 0.139951 | 0.21402  |
| MTMR1     | Xq28          | 0.075633 | 0.140076 | 0.214195 |
| STK3      | 8q22.2        | -0.07561 | 0.140174 | 0.214314 |
| LOC441666 | 10q11.21      | 0.075614 | 0.140176 | 0.214314 |
| SNORA23   | 11p15.4       | -0.07561 | 0.140213 | 0.214355 |
| TMCO5A    | 15q14         | -0.0756  | 0.140237 | 0.214366 |
| DCDC2B    | 1p35.2        | -0.0756  | 0.140242 | 0.214366 |
| TMEM266   | 15q24.2       | 0.075575 | 0.14038  | 0.214561 |
| IL1F10    | 2q14.1        | -0.07557 | 0.140425 | 0.214613 |
| NBPF1     | 1p36.13       | 0.075564 | 0.140442 | 0.214623 |

|           |          |          |          |          |
|-----------|----------|----------|----------|----------|
| FAM43B    | 1p36.12  | 0.075548 | 0.140523 | 0.21473  |
| RBM44     | 2q37.3   | -0.07553 | 0.140608 | 0.214841 |
| GLRA2     | Xp22.2   | -0.07553 | 0.140617 | 0.214841 |
| MAFF      | 22q13.1  | 0.075514 | 0.140703 | 0.214956 |
| BTN2A2    | 6p22.2   | -0.07551 | 0.140734 | 0.214987 |
| FAM227B   | 15q21.2  | 0.075475 | 0.140912 | 0.21524  |
| MYF6      | 12q21.31 | 0.075473 | 0.140921 | 0.21524  |
| TOM1L1    | 17q22    | 0.075469 | 0.140939 | 0.215252 |
| PSME4     | 2p16.2   | 0.075462 | 0.140978 | 0.215283 |
| CGA       | 6q14.3   | 0.075461 | 0.140982 | 0.215283 |
| KCNJ10    | 1q23.2   | 0.075445 | 0.14107  | 0.215402 |
| PHLDA3    | 1q32.1   | 0.07544  | 0.141094 | 0.215406 |
| C9ORF139  | 9q34.3   | 0.07544  | 0.141094 | 0.215406 |
| IRGM      | 5q33.1   | 0.07543  | 0.141146 | 0.215468 |
| NME9      | 3q22.3   | 0.075424 | 0.141181 | 0.215506 |
| MCCC1     | 3q27.1   | -0.07542 | 0.141209 | 0.215521 |
| LYZL4     | 3p22.1   | -0.07542 | 0.141213 | 0.215521 |
| HIPK4     | 19q13.2  | 0.0754   | 0.141306 | 0.215648 |
| OR9A2     | 7q34     | -0.0754  | 0.14132  | 0.21565  |
| EXOC1     | 4q12     | 0.075394 | 0.141335 | 0.21565  |
| CARMN     | 5q32     | 0.075393 | 0.141341 | 0.21565  |
| CSRP3     | 11p15.1  | -0.07539 | 0.141357 | 0.215659 |
| MGAT5B    | 17q25.2  | 0.075383 | 0.141396 | 0.215703 |
| NMT2      | 10p13    | -0.07537 | 0.141482 | 0.215818 |
| KRTAP10-9 | 21q22.3  | -0.07535 | 0.141545 | 0.215884 |
| HIST1H2BE | 6p22.2   | -0.07535 | 0.141547 | 0.215884 |
| SLC31A2   | 9q32     | 0.07535  | 0.14157  | 0.215902 |
| MYBPC3    | 11p11.2  | -0.07531 | 0.14179  | 0.216221 |
| FAM166A   | 9q34.3   | -0.07531 | 0.141803 | 0.216225 |
| ARHGEF5   | 7q35     | 0.075304 | 0.141816 | 0.216227 |
| LOC285847 | 6p21.31  | -0.07529 | 0.141871 | 0.216295 |
| SUMO1P1   | 20q13.2  | 0.075287 | 0.141905 | 0.216319 |
| TPCN1     | 12q24.13 | 0.075286 | 0.141908 | 0.216319 |
| TMEM67    | 8q22.1   | -0.07528 | 0.14196  | 0.216381 |
| MGC16142  | -        | -0.07527 | 0.142009 | 0.216439 |
| PAGE4     | Xp11.23  | -0.07526 | 0.142042 | 0.216474 |
| NCOR1P1   | 20p11.1  | -0.07526 | 0.142066 | 0.216485 |
| CGB7      | 19q13.33 | -0.07526 | 0.142071 | 0.216485 |
| CRADD     | 12q22    | 0.075241 | 0.142151 | 0.216589 |
| SLC6A7    | 5q32     | -0.07523 | 0.142208 | 0.21666  |
| CPE       | 4q32.3   | 0.075228 | 0.142219 | 0.216661 |
| DCTD      | 4q35.1   | -0.07522 | 0.142273 | 0.216722 |
| BTBD11    | 12q23.3  | 0.075216 | 0.142281 | 0.216722 |
| REEP4     | 8p21.3   | -0.0752  | 0.142358 | 0.216823 |
| HNRNPDL   | 4q21.22  | -0.07518 | 0.14245  | 0.216933 |
| RNASEH1   | 2p25.3   | -0.07518 | 0.142452 | 0.216933 |
| ANXA2R    | 5p12     | 0.07515  | 0.142632 | 0.217174 |
| PWP1      | 12q23.3  | -0.07515 | 0.142632 | 0.217174 |
| EPB41L1   | 20q11.23 | -0.07513 | 0.142727 | 0.217303 |
| LINC00620 | 3p25.1   | 0.075115 | 0.142819 | 0.217425 |
| ELOA      | 1p36.11  | 0.075108 | 0.142859 | 0.21747  |
| EMC7      | 15q14    | 0.075085 | 0.142979 | 0.217636 |
| CAPZA2    | 7q31.2   | 0.075068 | 0.143072 | 0.217761 |
| KRTAP21-2 | 21q22.11 | 0.075031 | 0.143271 | 0.218046 |
| AMH       | 19p13.3  | 0.075029 | 0.143281 | 0.218046 |
| TSKS      | 19q13.33 | 0.075025 | 0.143301 | 0.218055 |
| KCNK10    | 14q31.3  | 0.075024 | 0.143309 | 0.218055 |
| MYH7      | 14q11.2  | 0.07502  | 0.143329 | 0.21807  |

|            |                   |          |          |          |
|------------|-------------------|----------|----------|----------|
| FKBP6      | 7q11.23           | -0.075   | 0.143443 | 0.218227 |
| RPTN       | 1q21.3            | 0.07497  | 0.143593 | 0.218439 |
| KIAA0319L  | 1p34.3            | 0.074952 | 0.143693 | 0.218573 |
| EDN3       | 20q13.32          | 0.074937 | 0.14377  | 0.218675 |
| VARS       | 6p21.33           | -0.07493 | 0.143817 | 0.21873  |
| HCRT       | 17q21.2           | -0.07491 | 0.143926 | 0.218878 |
| KIFC3      | 16q21             | 0.074896 | 0.143991 | 0.21896  |
| OGFOD1     | 16q13             | -0.07487 | 0.144158 | 0.219198 |
| CYCSP52    | 1q23.1            | 0.074848 | 0.144248 | 0.219318 |
| CPNE6      | 14q11.2           | -0.07485 | 0.144266 | 0.219329 |
| CHMP4C     | 8q21.13           | -0.07484 | 0.144319 | 0.219393 |
| NBPF22P    | 5q14.3            | 0.074748 | 0.144789 | 0.22009  |
| CFAP65     | 2q35              | -0.07472 | 0.144913 | 0.220262 |
| ZNF519     | 18p11.21          | -0.07472 | 0.144935 | 0.220278 |
| PIGZ       | 3q29              | 0.074715 | 0.144967 | 0.220309 |
| CFAP57     | 1p34.2            | 0.074713 | 0.144977 | 0.220309 |
| ANGPTL4    | 19p13.2           | 0.07469  | 0.145103 | 0.220484 |
| TAPBP      | 6p21.32           | -0.07469 | 0.145123 | 0.220498 |
| ZNF670     | 1q44              | 0.074674 | 0.145188 | 0.22058  |
| PEG3-AS1   | 19q13.43          | 0.074667 | 0.145228 | 0.220624 |
| TTY10      | Yq11.223          | -0.07463 | 0.145414 | 0.22089  |
| TPI1P3     | 6q22.1            | -0.07463 | 0.145433 | 0.220901 |
| UCN2       | 3p21.31           | -0.07459 | 0.14563  | 0.221185 |
| SPRR2B     | 1q21.3            | -0.07457 | 0.145729 | 0.221318 |
| PLAGL1     | 6q24.2            | 0.07454  | 0.145911 | 0.221576 |
| STAT6      | 12q13.3           | 0.074517 | 0.14604  | 0.221756 |
| CNOT11     | 2q11.2            | -0.07451 | 0.146051 | 0.221756 |
| PCDHB19P   | 5q31.3            | 0.074483 | 0.146221 | 0.221998 |
| IL36B      | 2q14.1            | 0.074479 | 0.146246 | 0.222018 |
| HCN1       | 5p12              | 0.074474 | 0.14627  | 0.222039 |
| ZNF662     | 3p22.1            | 0.07445  | 0.146401 | 0.222207 |
| PTPRO      | 12p12.3 12p13-p12 | -0.07445 | 0.146408 | 0.222207 |
| NPAS4      | 11q13.2           | 0.074448 | 0.146415 | 0.222207 |
| KRT26      | 17q21.2           | 0.074423 | 0.146546 | 0.22239  |
| NKX6-2     | 10q26.3           | 0.074404 | 0.146655 | 0.222534 |
| FTX        | Xq13.2            | -0.0744  | 0.146668 | 0.222534 |
| TMEM35A    | Xq22.1            | 0.0744   | 0.146674 | 0.222534 |
| CRH        | 8q13.1            | -0.07439 | 0.146745 | 0.22261  |
| LINC00494  | 20q13.13          | 0.074387 | 0.146747 | 0.22261  |
| TTK        | 6q14.1            | -0.07438 | 0.146763 | 0.222618 |
| MED18      | 1p35.3            | -0.07438 | 0.146792 | 0.222633 |
| APOA5      | 11q23.3           | -0.07438 | 0.146795 | 0.222633 |
| RNASE13    | 14q11.2           | 0.074374 | 0.146816 | 0.222647 |
| SIAH3      | 13q14.13          | 0.074363 | 0.146876 | 0.222722 |
| RAD51AP1   | 12p13.32          | -0.07431 | 0.147173 | 0.223155 |
| DGKD       | 2q37.1            | -0.0743  | 0.147208 | 0.223174 |
| ANKRD24    | 19p13.3           | 0.074301 | 0.147212 | 0.223174 |
| MRGPRG-AS1 | 11p15.4           | -0.0743  | 0.147219 | 0.223174 |
| SLC35C1    | 11p11.2           | 0.074294 | 0.147252 | 0.223207 |
| SLC35F4    | 14q22.3-q23.1     | 0.074286 | 0.147293 | 0.223253 |
| INMT       | 7p14.3            | 0.074262 | 0.147425 | 0.223435 |
| SCARNA27   | 6p24.3            | 0.074251 | 0.147488 | 0.223515 |
| HRH3       | 20q13.33          | -0.07424 | 0.147546 | 0.223586 |
| LRR1       | 14q21.3           | -0.07423 | 0.147615 | 0.223667 |
| MYO15B     | 17q25.1           | -0.07423 | 0.147622 | 0.223667 |
| CCDC9B     | 15q15.1           | 0.074207 | 0.147728 | 0.223811 |
| ATG14      | 14q22.3           | 0.074194 | 0.147799 | 0.223901 |
| LOC641367  | 19p12             | 0.074164 | 0.147965 | 0.224136 |

|           |              |          |          |          |
|-----------|--------------|----------|----------|----------|
| MDC1      | 6p21.33      | 0.074151 | 0.148033 | 0.224221 |
| SLC45A3   | 1q32.1       | 0.074143 | 0.148076 | 0.224259 |
| PWWP3B    | Xq22.3       | 0.074143 | 0.14808  | 0.224259 |
| MAGEA8    | Xq28         | 0.074094 | 0.148344 | 0.224631 |
| LHX5      | 12q24.13     | -0.07409 | 0.148356 | 0.224631 |
| LINC00284 | 13q14.11     | 0.074092 | 0.14836  | 0.224631 |
| PRCD      | 17q25.1      | -0.07407 | 0.148478 | 0.224793 |
| INKA1     | 3p21.31      | -0.07406 | 0.148528 | 0.224853 |
| ACOT9     | Xp22.11      | -0.07406 | 0.148544 | 0.22486  |
| SLC9C1    | 3q13.2       | 0.074055 | 0.148562 | 0.22487  |
| PTGES     | 9q34.11      | -0.07405 | 0.148605 | 0.224918 |
| UBE2R2    | 9p13.3       | -0.07403 | 0.148685 | 0.225022 |
| ZNF213    | 16p13.3      | -0.074   | 0.148856 | 0.225264 |
| RDH10     | 8q21.11      | 0.073996 | 0.148883 | 0.225288 |
| ZNF14     | 19p13.11     | -0.07398 | 0.148984 | 0.225423 |
| MED17     | 11q21        | 0.073974 | 0.149009 | 0.225444 |
| IL17D     | 13q12.11     | -0.07396 | 0.14906  | 0.225504 |
| CYP4V2    | 4q35.1-q35.2 | 0.073928 | 0.149258 | 0.22578  |
| LINC02447 | 4p16.1       | -0.07393 | 0.149265 | 0.22578  |
| UBE2E2    | 3p24.3       | 0.073908 | 0.149373 | 0.225917 |
| HHLA2     | 3q13.13      | 0.073907 | 0.149378 | 0.225917 |
| NAA11     | 4q21.21      | -0.07389 | 0.149471 | 0.22604  |
| HNRNPH2   | Xq22.1       | 0.073888 | 0.149483 | 0.226041 |
| RAET1G    | 6q25.1       | 0.073879 | 0.149529 | 0.226093 |
| PCDHGA11  | 5q31.3       | 0.073872 | 0.149568 | 0.226137 |
| IFI44     | 1p31.1       | 0.073851 | 0.149688 | 0.2263   |
| SOX17     | 8q11.23      | 0.073845 | 0.14972  | 0.226331 |
| WFDC5     | 20q13.12     | 0.073839 | 0.149753 | 0.226365 |
| ASB1      | 2q37.3       | 0.073815 | 0.149886 | 0.226549 |
| CYP51A1   | 7q21.2       | 0.073797 | 0.149985 | 0.22668  |
| RHCE      | 1p36.11      | -0.0738  | 0.149995 | 0.22668  |
| MRGPRX1   | 11p15.1 11   | 0.073768 | 0.150143 | 0.226884 |
| CRP       | 1q23.2       | 0.073767 | 0.150153 | 0.226884 |
| PIP       | 7q34         | 0.073748 | 0.150256 | 0.227021 |
| THY1      | 11q23.3      | 0.07374  | 0.150299 | 0.22707  |
| UBE4A     | 11q23.3      | 0.073734 | 0.150336 | 0.227109 |
| DDX52     | 17q12        | -0.07373 | 0.150348 | 0.227109 |
| SNCB      | 5q35.2       | 0.073716 | 0.150432 | 0.227219 |
| PPP2R2C   | 4p16.1       | -0.07371 | 0.150466 | 0.227254 |
| HAPLN2    | 1q23.1       | -0.07368 | 0.150655 | 0.227522 |
| KIAA0408  | 6q22.33      | 0.073654 | 0.150778 | 0.227691 |
| SPATA31A3 | 9q21.11      | -0.07365 | 0.150814 | 0.227728 |
| OR10K2    | 1q23.1       | 0.073637 | 0.150873 | 0.2278   |
| SYAP1     | Xp22.2       | -0.07362 | 0.150972 | 0.227915 |
| DNAJC11   | 1p36.31      | -0.07362 | 0.150972 | 0.227915 |
| GNRHR2    | 1q21.1       | -0.07361 | 0.150999 | 0.227938 |
| TMEM59L   | 19p13.11     | 0.073603 | 0.151062 | 0.228016 |
| INSL4     | 9p24.1       | 0.073598 | 0.15109  | 0.228041 |
| C1QTNF12  | 1p36.33      | -0.07359 | 0.151152 | 0.228118 |
| CNDP1     | 18q22.3      | -0.07357 | 0.151254 | 0.228255 |
| CXORF66   | Xq27.1       | -0.07353 | 0.151465 | 0.228555 |
| OTOR      | 20p12.1      | 0.073512 | 0.151568 | 0.228694 |
| TRPV6     | 7q34         | 0.073506 | 0.151602 | 0.228727 |
| PTH2R     | 2q34         | 0.073501 | 0.151632 | 0.228755 |
| USP19     | 3p21.31      | 0.073489 | 0.151695 | 0.228833 |
| MMP10     | 11q22.2      | 0.073487 | 0.151707 | 0.228834 |
| CYP1A2    | 15q24.1      | 0.073474 | 0.151782 | 0.228931 |
| TIGD6     | 5q32         | 0.073456 | 0.151884 | 0.229067 |



|           |              |          |          |          |
|-----------|--------------|----------|----------|----------|
| CAMP      | 3p21.31      | 0.073454 | 0.151895 | 0.229067 |
| SPESP1    | 15q23        | 0.073442 | 0.151961 | 0.229149 |
| UBE2K     | 4p14         | 0.07344  | 0.151974 | 0.229151 |
| RNF13     | 3q25.1       | 0.073432 | 0.152015 | 0.229196 |
| DMRT2     | 9p24.3       | 0.073423 | 0.152067 | 0.229238 |
| TRMT6     | 20p12.3      | -0.07342 | 0.152074 | 0.229238 |
| PADI4     | 1p36.13      | 0.073421 | 0.152077 | 0.229238 |
| FTHL17    | Xp21.2       | -0.07339 | 0.15224  | 0.229465 |
| IL22      | 12q15        | -0.07339 | 0.152261 | 0.22948  |
| CA10      | 17q21.33-q22 | 0.073348 | 0.152487 | 0.229797 |
| HTRA1     | 10q26.13     | 0.073345 | 0.152502 | 0.229797 |
| SDHAP1    | 3q29         | -0.07334 | 0.152506 | 0.229797 |
| KRT76     | 12q13.13     | -0.07334 | 0.152534 | 0.229823 |
| FAM111B   | 11q12.1      | 0.073327 | 0.152607 | 0.229915 |
| GP2       | 16p12.3      | 0.073321 | 0.152638 | 0.229945 |
| FOXC1     | 6p25.3       | 0.073312 | 0.15269  | 0.230006 |
| CRYZ      | 1p31.1       | 0.073295 | 0.152785 | 0.230131 |
| CEACAM3   | 19q13.2      | 0.073288 | 0.152824 | 0.230169 |
| ZFP62     | 5q35.3       | 0.073286 | 0.152833 | 0.230169 |
| NKX2-1    | 14q13.3      | 0.07321  | 0.153262 | 0.230797 |
| C2ORF78   | 2p13.1       | 0.073206 | 0.153283 | 0.230813 |
| DYNC111   | 7q21.3       | 0.07319  | 0.153374 | 0.230932 |
| SMIM19    | 8p11.21      | -0.07318 | 0.153413 | 0.230973 |
| MTFMT     | 15q22.31     | 0.073163 | 0.153528 | 0.231129 |
| USP49     | 6p21.1       | 0.073157 | 0.153563 | 0.231164 |
| RTCA      | 1p21.2       | -0.07314 | 0.153647 | 0.231273 |
| KRT77     | 12q13.13     | 0.073136 | 0.153681 | 0.231307 |
| XPNPEP3   | 22q13.2      | -0.07312 | 0.153747 | 0.231384 |
| TM2D1     | 1p31.3       | -0.07312 | 0.153755 | 0.231384 |
| TMEM231   | 16q23.1      | -0.07312 | 0.153783 | 0.231409 |
| TLCD5     | 11q23.3      | 0.073081 | 0.153988 | 0.231699 |
| CXCR6     | 3p21.31      | 0.073077 | 0.154014 | 0.2317   |
| FBXO10    | 9p13.2       | -0.07308 | 0.154019 | 0.2317   |
| INSYN2A   | 10q26.2      | 0.073075 | 0.154023 | 0.2317   |
| SYT5      | 19q13.42 11p | 0.073041 | 0.154217 | 0.231975 |
| APEX1     | 14q11.2      | -0.07301 | 0.154375 | 0.232194 |
| GOLGA8DP  | 15q11.2      | -0.07299 | 0.154531 | 0.232412 |
| TEX101    | 19q13.31     | 0.072971 | 0.154609 | 0.232512 |
| ARSG      | 17q24.2      | 0.072949 | 0.154736 | 0.232684 |
| TBC1D3G   | 17q12        | -0.07294 | 0.154785 | 0.232741 |
| POLR2J2   | 7q22.1       | -0.07293 | 0.154847 | 0.232816 |
| MLC1      | 22q13.33     | 0.072928 | 0.154858 | 0.232816 |
| ATP5F1B   | 12q13.3      | 0.072916 | 0.154925 | 0.232899 |
| TENT5D    | Xq21.1       | 0.072912 | 0.154948 | 0.232903 |
| NFXL1     | 4p12         | 0.072911 | 0.154951 | 0.232903 |
| FETUB     | 3q27.3       | 0.072861 | 0.155233 | 0.23331  |
| GPRC6A    | 6q22.1       | 0.072838 | 0.155368 | 0.233496 |
| NAALADL2  | 3q26.31      | 0.072787 | 0.155656 | 0.23391  |
| GTSE1     | 22q13.31     | -0.07278 | 0.155711 | 0.233975 |
| PARP2     | 14q11.2      | -0.07276 | 0.155788 | 0.234074 |
| SNX32     | 11q13.1      | -0.07275 | 0.155869 | 0.234178 |
| LINC00314 | 21q21.3      | -0.07271 | 0.156109 | 0.234508 |
| MAP2K7    | 19p13.2      | -0.07271 | 0.156112 | 0.234508 |
| DLX5      | 7q21.3       | 0.072695 | 0.156183 | 0.234597 |
| AOC1      | 7q36.1       | 0.072681 | 0.156261 | 0.234696 |
| FMO4      | 1q24.3       | 0.072677 | 0.156282 | 0.23471  |
| C14ORF39  | 14q23.1      | 0.072659 | 0.156387 | 0.234851 |
| CELA1     | 12q13.13     | 0.07261  | 0.156666 | 0.235252 |

|            |               |          |          |          |
|------------|---------------|----------|----------|----------|
| SP7        | 12q13.13      | 0.072599 | 0.156731 | 0.235331 |
| GTF2E2     | 8p12          | -0.07258 | 0.156824 | 0.235453 |
| SLC25A13   | 7q21.3        | -0.07257 | 0.156888 | 0.235532 |
| SAMD7      | 3q26.2        | 0.072565 | 0.156928 | 0.235562 |
| LOC650293  | 4p16.1        | -0.07256 | 0.156932 | 0.235562 |
| FAM186B    | 12q13.12      | -0.07255 | 0.157033 | 0.235682 |
| TEX15      | 8p12          | 0.072546 | 0.157035 | 0.235682 |
| LINC00294  | 11p13         | 0.072528 | 0.157135 | 0.235814 |
| ACTA1      | 1q42.13       | -0.07252 | 0.157207 | 0.235905 |
| PRAMEF1    | 1p36.21       | 0.07251  | 0.157242 | 0.235922 |
| CCDC88B    | 11q13.1       | -0.07251 | 0.157242 | 0.235922 |
| LRRC27     | 10q26.3       | -0.07249 | 0.15735  | 0.236066 |
| CIZ1       | 9q34.11       | -0.07245 | 0.157607 | 0.236434 |
| ANKRD42    | 11q14.1       | 0.072437 | 0.157663 | 0.2365   |
| PI3        | 20q13.12      | 0.072416 | 0.157779 | 0.236657 |
| TAC1       | 7q21.3        | 0.072404 | 0.15785  | 0.236746 |
| CDKAL1     | 6p22.3        | -0.07239 | 0.157947 | 0.236874 |
| MEPE       | 4q22.1        | -0.07238 | 0.158001 | 0.236931 |
| TMEM192    | 4q32.3        | -0.07238 | 0.158009 | 0.236931 |
| INTS4P1    | 7q11.21       | 0.072367 | 0.158062 | 0.236992 |
| CFHR4      | 1q31.3        | -0.07236 | 0.158092 | 0.237019 |
| ZMYM5      | 13q12.11      | -0.07233 | 0.158299 | 0.237312 |
| MATN1      | 1p35.2        | -0.07232 | 0.158348 | 0.237368 |
| POC1B      | 12q21.33      | 0.072281 | 0.158561 | 0.237669 |
| C3ORF49    | 3p14.1        | -0.07227 | 0.158598 | 0.237689 |
| STAG3L1    | 7q11.23       | 0.072272 | 0.15861  | 0.237689 |
| HTRA3      | 4p16.1        | 0.072271 | 0.158617 | 0.237689 |
| TSPAN18    | 11p11.2       | 0.07227  | 0.158622 | 0.237689 |
| TWISTNB    | 7p21.1        | -0.07224 | 0.158775 | 0.237888 |
| OR5V1      | 6p22.1        | 0.072243 | 0.158778 | 0.237888 |
| LRRC73     | 6p21.1        | 0.072236 | 0.158822 | 0.237936 |
| RAB6B      | 3q22.1        | 0.072227 | 0.158872 | 0.237993 |
| RPS6KB1    | 17q23.1       | 0.072197 | 0.159047 | 0.238238 |
| CAPS2      | 12q21.1-q21.2 | -0.07217 | 0.159206 | 0.238458 |
| DMPK       | 19q13.32      | 0.072131 | 0.159427 | 0.23877  |
| TBXA2R     | 19p13.3       | 0.072109 | 0.159553 | 0.238941 |
| KCNMB3     | 3q26.32       | -0.0721  | 0.159621 | 0.239026 |
| TBC1D4     | 13q22.2       | -0.07208 | 0.159706 | 0.239136 |
| LY6H       | 8q24.3        | 0.072072 | 0.159767 | 0.239208 |
| SAA2       | 11p15.1       | -0.07206 | 0.159811 | 0.239256 |
| PCGF3      | 4p16.3        | -0.07204 | 0.159935 | 0.239425 |
| DAPK3      | 19p13.3       | -0.07204 | 0.15995  | 0.239429 |
| KCTD18     | 2q33.1        | 0.072017 | 0.160091 | 0.239621 |
| LHFPL3-AS2 | 7q22.2-q22.3  | 0.072001 | 0.160184 | 0.239743 |
| LLPH       | 12q14.3       | -0.072   | 0.160206 | 0.239758 |
| TBX10      | 11q13.2       | -0.07199 | 0.160257 | 0.239817 |
| CA11       | 19q13.33      | -0.07198 | 0.160282 | 0.239837 |
| SRP14      | 15q15.1       | 0.071977 | 0.160321 | 0.239877 |
| SULT6B1    | 2p22.2        | -0.07197 | 0.160368 | 0.239928 |
| LINC00950  | 9p13.3        | 0.071963 | 0.160403 | 0.239963 |
| DEGS1      | 1q42.11       | 0.071949 | 0.160483 | 0.240065 |
| HLA-DRB1   | 6p21.32       | 0.071947 | 0.160495 | 0.240066 |
| MANSC1     | 12p13.2       | 0.071928 | 0.16061  | 0.240219 |
| RGS9BP     | 19q13.11      | -0.07192 | 0.160632 | 0.240234 |
| GTF3C1     | 16p12.1       | 0.07191  | 0.160715 | 0.240341 |
| ZNF596     | 8p23.3        | 0.071868 | 0.160956 | 0.240684 |
| COX7B2     | 4p12          | -0.07186 | 0.161002 | 0.240734 |
| ZNF99      | 19p12         | 0.071852 | 0.161051 | 0.240789 |

|           |                |          |          |          |
|-----------|----------------|----------|----------|----------|
| KISS1R    | 19p13.3        | -0.07184 | 0.161144 | 0.240909 |
| CITED1    | Xq13.1         | -0.07183 | 0.161155 | 0.240909 |
| OR10A6    | 11p15.4        | -0.07183 | 0.161173 | 0.240917 |
| HSFY1P1   | 22q11.1        | 0.071779 | 0.161481 | 0.24135  |
| SLC36A2   | 5q33.1         | -0.07178 | 0.161493 | 0.24135  |
| LINC02159 | 5q34           | -0.07178 | 0.161498 | 0.24135  |
| OR52N4    | 11p15.4        | 0.071762 | 0.161575 | 0.241446 |
| SLURP1    | 8q24.3         | -0.07175 | 0.161649 | 0.241538 |
| TUBB      | 6p21.33        | -0.07174 | 0.161732 | 0.241645 |
| KDELR2    | 7p22.1         | -0.07166 | 0.162194 | 0.242316 |
| DUSP18    | 22q12.2        | 0.071649 | 0.16224  | 0.242368 |
| AP5B1     | 11q13.1        | 0.071646 | 0.162259 | 0.242378 |
| STXBP1    | 9q34.11        | 0.071624 | 0.162387 | 0.242551 |
| APOL3     | 22q12.3        | 0.071617 | 0.162431 | 0.242599 |
| CSMD3     | 8q23.3         | 0.071613 | 0.162451 | 0.242611 |
| USP32P2   | 17p11.2        | 0.071608 | 0.16248  | 0.242636 |
| FLJ37201  | 10q23.31       | -0.07158 | 0.162618 | 0.242824 |
| SELENOM   | 22q12.2        | -0.07158 | 0.162652 | 0.242856 |
| TFE3      | Xp11.23        | -0.07156 | 0.162789 | 0.243042 |
| ZNF486    | 19p12          | 0.071546 | 0.162846 | 0.243109 |
| TCF23     | 2p23.3         | 0.071544 | 0.162862 | 0.243115 |
| RGS4      | 1q23.3         | 0.071515 | 0.163032 | 0.243352 |
| CDC14B    | 9q22.32-q22.33 | 0.071501 | 0.16311  | 0.243449 |
| FGFR3     | 4p16.3         | -0.07148 | 0.163251 | 0.243642 |
| RBAK      | 7p22.1         | 0.071467 | 0.163313 | 0.243716 |
| ATXN7L3B  | 12q21.1        | 0.071462 | 0.163341 | 0.24374  |
| LINC01959 | 5q31.1         | -0.07143 | 0.163552 | 0.244036 |
| ARL8B     | 3p26.1         | 0.071421 | 0.163587 | 0.24407  |
| LOXL3     | 2p13.1         | 0.071413 | 0.163634 | 0.244122 |
| GSDMC     | 8q24.21        | 0.071406 | 0.163676 | 0.244166 |
| OR6C3     | 12q13.2        | -0.07139 | 0.163742 | 0.244248 |
| SLC38A8   | 16q23.3        | -0.07138 | 0.163807 | 0.244326 |
| APOE      | 19q13.32       | 0.071366 | 0.16391  | 0.244462 |
| SAP30     | 4q34.1         | -0.07136 | 0.163952 | 0.244506 |
| MTMR11    | 1q21.2         | 0.071332 | 0.16411  | 0.244696 |
| SLC22A20P | 11q13.1        | 0.071332 | 0.164114 | 0.244696 |
| DEDD2     | 19q13.2        | -0.07133 | 0.164127 | 0.244696 |
| DPH1      | 17p13.3        | -0.07133 | 0.164128 | 0.244696 |
| LIPN      | 10q23.31       | 0.071297 | 0.164316 | 0.244958 |
| TCTN2     | 12q24.31       | 0.071284 | 0.164394 | 0.245055 |
| NADK2     | 5p13.2         | 0.07125  | 0.164596 | 0.245338 |
| GPR162    | 12p13.31       | 0.071242 | 0.164646 | 0.245394 |
| TERB1     | 16q22.1        | -0.07124 | 0.164678 | 0.245424 |
| AVIL      | 12q14.1        | 0.071222 | 0.164767 | 0.24552  |
| CEP152    | 15q21.1        | 0.071222 | 0.164767 | 0.24552  |
| WFDC13    | 20q13.12       | -0.07122 | 0.16479  | 0.245536 |
| ELP3      | 8p21.1         | 0.071213 | 0.164821 | 0.245564 |
| MCTS2P    | 20q11.21       | -0.0712  | 0.164876 | 0.245628 |
| RCVRN     | 17p13.1        | 0.071195 | 0.164924 | 0.245681 |
| XYLB      | 3p22.2         | -0.07116 | 0.165153 | 0.246    |
| HNRNPF    | 10q11.21       | 0.071155 | 0.165163 | 0.246    |
| SLC6A12   | 12p13.33       | 0.071151 | 0.165189 | 0.246021 |
| CCDC15    | 11q24.2        | 0.071135 | 0.16528  | 0.246138 |
| HS3ST6    | 16p13.3        | 0.07113  | 0.165312 | 0.246167 |
| GTPBP2    | 6p21.1         | -0.07111 | 0.165459 | 0.246368 |
| KCNIP4    | 4p15.31-p15.2  | -0.07108 | 0.165587 | 0.24654  |
| PLSCR3    | 17p13.1        | 0.071081 | 0.165605 | 0.246548 |
| PITPNM1   | 11q13.2        | 0.071062 | 0.165717 | 0.246697 |

|           |          |          |          |          |
|-----------|----------|----------|----------|----------|
| OR52K2    | 11p15.4  | 0.071026 | 0.165934 | 0.247001 |
| APOBEC2   | 6p21.1   | -0.07102 | 0.16597  | 0.247037 |
| HMGNA4    | 6p22.2   | -0.07101 | 0.166049 | 0.247137 |
| MERTK     | 2q13     | 0.070993 | 0.166129 | 0.247237 |
| TYMS      | 18p11.32 | 0.070974 | 0.166244 | 0.247389 |
| LYSMD4    | 15q26.3  | 0.070966 | 0.166294 | 0.247446 |
| HYAL4     | 7q31.32  | 0.070958 | 0.16634  | 0.247496 |
| SOX2      | 3q26.33  | 0.070934 | 0.166483 | 0.24769  |
| WWC1      | 5q34     | 0.070892 | 0.166738 | 0.248051 |
| KRT27     | 17q21.2  | 0.070845 | 0.167014 | 0.248443 |
| FAM24A    | 10q26.13 | -0.07081 | 0.167253 | 0.24878  |
| STAT1     | 2q32.2   | 0.070801 | 0.167283 | 0.248807 |
| CILP2     | 19p13.11 | -0.0708  | 0.167314 | 0.248835 |
| NPBWR1    | 8q11.23  | 0.070793 | 0.16733  | 0.248839 |
| NRIP2     | 12p13.33 | 0.070766 | 0.167489 | 0.249058 |
| PLGRKT    | 9p24.1   | -0.07075 | 0.167583 | 0.249178 |
| PDCD10    | 3q26.1   | 0.070709 | 0.167834 | 0.249533 |
| OPN1SW    | 7q32.1   | -0.0707  | 0.16788  | 0.249583 |
| NDFIP2    | 13q31.1  | -0.07066 | 0.168139 | 0.24995  |
| HMHB1     | 5q31.3   | -0.07064 | 0.168222 | 0.250055 |
| CDH8      | 16q21    | 0.070633 | 0.168294 | 0.250143 |
| H1FNT     | 12q13.11 | 0.070594 | 0.168529 | 0.250474 |
| POU2F1    | 1q24.2   | 0.070586 | 0.168579 | 0.250529 |
| ZNF672    | 1q44     | 0.07058  | 0.168615 | 0.250565 |
| CCDC177   | 14q24.1  | 0.070561 | 0.168727 | 0.250713 |
| FABP5P3   | 7q36.1   | -0.07055 | 0.168767 | 0.250753 |
| CCSER1    | 4q22.1   | 0.070522 | 0.168964 | 0.251028 |
| ZBTB26    | 9q33.2   | 0.070518 | 0.168991 | 0.251049 |
| PPP1R3E   | 14q11.2  | -0.0705  | 0.16908  | 0.251144 |
| ARMCX6    | Xq22.1   | -0.0705  | 0.169081 | 0.251144 |
| TAL2      | 9q31.2   | -0.07048 | 0.169222 | 0.251335 |
| AMMECR1L  | 2q14.3   | 0.070477 | 0.169237 | 0.25134  |
| SPSB1     | 1p36.22  | 0.07046  | 0.169339 | 0.251472 |
| ANKRD65   | 1p36.33  | 0.070453 | 0.169384 | 0.25152  |
| ZNF853    | 7p22.1   | -0.07045 | 0.16942  | 0.251555 |
| NKX2-4    | 20p11.22 | -0.07041 | 0.169665 | 0.251899 |
| ZFAND3    | 6p21.2   | 0.070402 | 0.169693 | 0.251924 |
| ZNF101    | 19p13.11 | -0.07039 | 0.169743 | 0.251979 |
| CCL2      | 17q12    | 0.070388 | 0.169778 | 0.252004 |
| ZEB1-AS1  | 10p11.22 | 0.070387 | 0.169786 | 0.252004 |
| OR10T2    | 1q23.1   | 0.070385 | 0.169798 | 0.252004 |
| PPP1R9B   | 17q21.33 | -0.07034 | 0.170057 | 0.25237  |
| OR10G2    | 14q11.2  | 0.070339 | 0.170074 | 0.252377 |
| RBM1A1    | Yq11.223 | 0.070311 | 0.17025  | 0.252619 |
| C20ORF144 | 20q11.22 | -0.0703  | 0.170291 | 0.252661 |
| SLCO1B3   | 12p12.2  | 0.07027  | 0.170495 | 0.252945 |
| NPY       | 7p15.3   | 0.070267 | 0.170516 | 0.252958 |
| GLCCI1    | 7p21.3   | 0.070264 | 0.170535 | 0.252967 |
| PRMT5     | 14q11.2  | 0.070262 | 0.170548 | 0.252967 |
| CATSPER3  | 5q31.1   | -0.07026 | 0.170566 | 0.252976 |
| TRIM78P   | 11p15    | -0.07025 | 0.17061  | 0.253021 |
| KCNN1     | 19p13.11 | 0.070228 | 0.170755 | 0.253218 |
| NETO1     | 18q22.3  | 0.070226 | 0.170768 | 0.253218 |
| SLC39A10  | 2q32.3   | 0.070176 | 0.17107  | 0.253648 |
| CCDC9     | 19q13.32 | -0.07016 | 0.171163 | 0.253767 |
| MYBPC1    | 12q23.2  | 0.070155 | 0.1712   | 0.253802 |
| PCDHGB2   | 5q31.3   | 0.070136 | 0.171317 | 0.253957 |
| DDR1G1    | 20p13    | -0.07012 | 0.171385 | 0.254039 |

|           |              |          |          |          |
|-----------|--------------|----------|----------|----------|
| ESM1      | 5q11.2       | 0.070106 | 0.171498 | 0.254188 |
| MSL1      | 17q21.1      | 0.070103 | 0.171517 | 0.254197 |
| TRIM77    | 11q14.3      | -0.0701  | 0.17153  | 0.254198 |
| ABCG2     | 4q22.1       | 0.070098 | 0.171548 | 0.254205 |
| SLC45A1   | 1p36.23      | 0.070085 | 0.171629 | 0.254307 |
| PPCS      | 1p34.2       | -0.07008 | 0.171659 | 0.254333 |
| CAPN3     | 15q15.1      | -0.07007 | 0.171695 | 0.254367 |
| SH2D3A    | 19p13.3      | -0.07007 | 0.171746 | 0.25441  |
| MAGEA2    | Xq28         | -0.07007 | 0.171749 | 0.25441  |
| CACNG1    | 17q24.2      | -0.07004 | 0.171927 | 0.254655 |
| PGLYRP3   | 1q21.3       | 0.069987 | 0.172228 | 0.255081 |
| RYR2      | 1q43         | 0.069985 | 0.172243 | 0.255085 |
| RIOX1     | 14q24.3      | -0.06997 | 0.172346 | 0.255216 |
| DEGS2     | 14q32.2      | 0.069966 | 0.172357 | 0.255216 |
| DHRS7     | 14q23.1      | 0.069958 | 0.172408 | 0.255273 |
| CLEC4GP1  | 19p13.2      | -0.06995 | 0.172429 | 0.255284 |
| MYBL1     | 8q13.1       | -0.06995 | 0.172442 | 0.255284 |
| C8A       | 1p32.2       | -0.06995 | 0.172474 | 0.255313 |
| CAPN11    | 6p21.1       | -0.06993 | 0.172585 | 0.255458 |
| GRHL3     | 1p36.11      | -0.06992 | 0.172651 | 0.255538 |
| GSTTP2    | 22q11.23     | 0.069907 | 0.17272  | 0.25562  |
| FGF12     | 3q28-q29     | 0.069903 | 0.172748 | 0.255643 |
| UBE2L6    | 11q12.1      | -0.0699  | 0.172761 | 0.255644 |
| LDLRAP1   | 1p36.11      | -0.06988 | 0.172883 | 0.255805 |
| PLCB1     | 20p12.3      | 0.069855 | 0.173045 | 0.256011 |
| NIPAL4    | 5q33.3       | 0.069854 | 0.173047 | 0.256011 |
| PKIG      | 20q13.12     | -0.06985 | 0.173061 | 0.256012 |
| CASTOR1   | 22q12.2      | 0.069829 | 0.1732   | 0.256199 |
| FBXO7     | 22q12.3      | -0.06982 | 0.173257 | 0.256265 |
| C11ORF88  | 11q23.1      | 0.069815 | 0.173289 | 0.256292 |
| OR56A4    | 11p15.4      | -0.06979 | 0.173421 | 0.256468 |
| LCN6      | 9q34.3       | 0.069762 | 0.173614 | 0.256736 |
| EIF4A2    | 3q27.3       | -0.06976 | 0.17364  | 0.256755 |
| CLDND1    | 3q11.2       | 0.069751 | 0.173681 | 0.256797 |
| HKDC1     | 10q22.1      | -0.06973 | 0.173839 | 0.257011 |
| EGFLAM    | 5p13.2-p13.1 | 0.069714 | 0.173912 | 0.2571   |
| ESRRB     | 14q24.3      | 0.06966  | 0.17425  | 0.257576 |
| PHC1      | 12p13.31     | 0.069658 | 0.17426  | 0.257576 |
| CYP2F1    | 19q13.2      | 0.069633 | 0.174416 | 0.257788 |
| SLC6A2    | 16q12.2      | -0.0696  | 0.174606 | 0.25805  |
| LOC202181 | 5q35.3       | 0.069596 | 0.174646 | 0.25809  |
| DIAPH2    | Xq21.33      | 0.069591 | 0.174677 | 0.258116 |
| HSP90B1   | 12q23.3      | 0.069586 | 0.174707 | 0.258127 |
| BRK1      | 3p25.3       | -0.06959 | 0.17471  | 0.258127 |
| PGLYRP1   | 19q13.32     | -0.06958 | 0.174759 | 0.25818  |
| DCHS2     | 4q31.3       | 0.069575 | 0.174774 | 0.258184 |
| ANXA8L1   | 10q11.22     | 0.069572 | 0.174794 | 0.258195 |
| NRN1      | 6p25.1       | 0.069554 | 0.174907 | 0.258335 |
| CELSR3    | 3p21.31      | -0.06955 | 0.174915 | 0.258335 |
| PRB1      | 12p13.2      | 0.069543 | 0.174975 | 0.258405 |
| CCDC54    | 3q13.12      | 0.069538 | 0.175007 | 0.258433 |
| MROH2B    | 5p13.1       | 0.069521 | 0.175108 | 0.258562 |
| KNTC1     | 12q24.31     | -0.06952 | 0.175133 | 0.258571 |
| CNTROB    | 17p13.1      | 0.069516 | 0.17514  | 0.258571 |
| SDC1      | 2p24.1       | -0.06951 | 0.175157 | 0.258578 |
| CLCC1     | 1p13.3       | 0.06949  | 0.175302 | 0.258773 |
| SEMA4C    | 2q11.2       | 0.069485 | 0.175337 | 0.258805 |
| SARM1     | 17q11.2      | 0.069467 | 0.175445 | 0.258946 |

|              |            |          |          |          |
|--------------|------------|----------|----------|----------|
| LINC00606    | 3p25.3     | -0.06946 | 0.175518 | 0.258996 |
| PPBPP1       | 4q13.3     | -0.06946 | 0.175518 | 0.258996 |
| DEFB123      | 20q11.21   | -0.06946 | 0.175518 | 0.258996 |
| CDK5RAP2     | 9q33.2     | 0.069442 | 0.175602 | 0.259101 |
| RASA4CP      | 7p13       | -0.06944 | 0.175624 | 0.259114 |
| PSMD11       | 17q11.2    | -0.06943 | 0.175654 | 0.259139 |
| HASPIN       | 17p13.2    | 0.069432 | 0.175667 | 0.259139 |
| TAS2R42      | 12p13.2    | -0.06943 | 0.1757   | 0.259164 |
| TMLHE        | Xq28       | -0.06942 | 0.17571  | 0.259164 |
| ABCG5        | 2p21       | 0.069411 | 0.175797 | 0.259274 |
| F2RL2        | 5q13.3     | 0.069398 | 0.175876 | 0.259357 |
| MIR1-1HG-AS1 | 20q13.33   | 0.069398 | 0.175879 | 0.259357 |
| THG1L        | 5q33.3     | -0.06939 | 0.175931 | 0.259415 |
| DGCR8        | 22q11.21   | -0.06937 | 0.176075 | 0.259608 |
| RASSF9       | 12q21.31   | -0.06936 | 0.176116 | 0.25965  |
| CA9          | 9p13.3     | 0.069351 | 0.176168 | 0.259707 |
| KCTD8        | 4p13       | 0.069338 | 0.176251 | 0.25981  |
| CRLF3        | 17q11.2    | 0.069333 | 0.176286 | 0.259843 |
| RNASE10      | 14q11.2    | -0.06933 | 0.176309 | 0.259858 |
| LINC00626    | 1q24.2     | 0.069322 | 0.176349 | 0.259885 |
| MID1         | Xp22.2     | 0.069322 | 0.176354 | 0.259885 |
| CDCP2        | 1p32.3     | 0.069303 | 0.176469 | 0.260036 |
| GINS4        | 8p11.21    | -0.06929 | 0.176576 | 0.260174 |
| ZNF2         | 2q11.1     | -0.06928 | 0.176628 | 0.260232 |
| INCA1        | 17p13.2    | -0.06922 | 0.177018 | 0.260786 |
| OTC          | Xp11.4     | 0.069212 | 0.17704  | 0.260801 |
| A4GNT        | 3q22.3     | 0.069208 | 0.177064 | 0.260816 |
| RGL4         | 22q11.23   | 0.069197 | 0.177137 | 0.260905 |
| POU4F2       | 4q31.22    | 0.069194 | 0.177154 | 0.260911 |
| MAP3K19      | 2q21.3     | -0.06918 | 0.177257 | 0.261042 |
| HBB          | 11p15.4    | 0.069172 | 0.177294 | 0.261078 |
| ACOX1        | 17q25.1    | 0.06917  | 0.177307 | 0.261079 |
| ISOC1        | 5q23.3     | -0.06914 | 0.177518 | 0.26137  |
| MAGEA1       | Xq28       | -0.06912 | 0.177591 | 0.261458 |
| NRGN         | 11q24.2    | -0.06912 | 0.177639 | 0.261509 |
| FAAH2        | Xp11.21    | -0.06907 | 0.177961 | 0.261964 |
| ACVR1C       | 2q24.1     | 0.069053 | 0.178041 | 0.262063 |
| PCDHB1       | 5q31.3     | 0.06905  | 0.178062 | 0.262074 |
| C4ORF17      | 4q23       | -0.069   | 0.178348 | 0.262476 |
| DEFB4A       | 8p23.1     | -0.069   | 0.178388 | 0.262516 |
| OR13C4       | 9q31.1     | 0.068991 | 0.178431 | 0.262556 |
| SPAG6        | 10p12.2    | 0.068989 | 0.178442 | 0.262556 |
| SSX3         | Xp11.23    | -0.06898 | 0.178513 | 0.262642 |
| ZNF816       | 19q13.41   | 0.068945 | 0.178723 | 0.262931 |
| ZC3H10       | 12q13.2    | 0.068934 | 0.178789 | 0.26301  |
| LPA          | 6q25.3-q26 | 0.068931 | 0.178809 | 0.263019 |
| PAIP2        | 5q31.2     | -0.06892 | 0.17889  | 0.263119 |
| XIRP1        | 3p22.2     | 0.068911 | 0.178938 | 0.263171 |
| GRP          | 18q21.32   | 0.0689   | 0.179009 | 0.263255 |
| MESTIT1      | 7q32.2     | 0.068883 | 0.179116 | 0.263393 |
| CYP4A22      | 1p33       | -0.06887 | 0.179185 | 0.263475 |
| WDR61        | 15q25.1    | 0.068861 | 0.179255 | 0.263559 |
| GKN1         | 2p13.3     | -0.06885 | 0.179314 | 0.263626 |
| CCDC114      | 19q13.33   | -0.06884 | 0.179368 | 0.263687 |
| GNPAT        | 1q42.2     | 0.068833 | 0.179432 | 0.263761 |
| OBSCN        | 1q42.13    | -0.06883 | 0.179447 | 0.263764 |
| TTY1B        | Yp11.2     | -0.06882 | 0.179499 | 0.263822 |
| RBM18        | 9q33.2     | 0.068818 | 0.179525 | 0.26384  |

|             |               |          |          |          |
|-------------|---------------|----------|----------|----------|
| HSPA7       | 1q23.3        | 0.068785 | 0.179736 | 0.264125 |
| DHRS4L2     | 14q11.2       | -0.06878 | 0.179756 | 0.264125 |
| ENPP3       | 6q23.2        | 0.06878  | 0.179766 | 0.264125 |
| IWS1        | 2q14.3        | 0.068776 | 0.179792 | 0.264125 |
| RAB13       | 1q21.3        | 0.068775 | 0.179798 | 0.264125 |
| PLA2G2A     | 1p36.13       | 0.068775 | 0.179798 | 0.264125 |
| CLTRN       | Xp22.2        | -0.06875 | 0.179932 | 0.264303 |
| TBL1X       | Xp22.31-p22.2 | 0.068744 | 0.179995 | 0.264358 |
| HCST        | 19q13.12      | 0.068744 | 0.179996 | 0.264358 |
| TREM2       | 6p21.1        | 0.068732 | 0.18007  | 0.264447 |
| H3F3A       | 1q42.12       | -0.0687  | 0.180301 | 0.264767 |
| HS3ST4      | 16p12.1       | -0.06869 | 0.180337 | 0.2648   |
| PATZ1       | 22q12.2       | -0.06867 | 0.180436 | 0.264927 |
| LINC00965   | 8p23.1        | 0.068671 | 0.18046  | 0.264942 |
| SHISA7      | 19q13.42      | 0.068661 | 0.180521 | 0.265012 |
| SPATS1      | 6p21.1        | 0.068649 | 0.180601 | 0.265104 |
| METAP1      | 4q23          | -0.06865 | 0.18061  | 0.265104 |
| LOC374443   | 12p13.31      | 0.068638 | 0.180671 | 0.265175 |
| TSNAX-DISC1 | 1q42.2        | -0.06862 | 0.180803 | 0.265348 |
| TMC7        | 16p12.3       | 0.068614 | 0.180822 | 0.265356 |
| VIRMA       | 8q22.1        | 0.068594 | 0.180948 | 0.265522 |
| NGB         | 14q24.3       | 0.068591 | 0.18097  | 0.265535 |
| LOC644936   | 5q14.1        | 0.068586 | 0.180997 | 0.265555 |
| ASS1        | 9q34.11       | -0.06856 | 0.181177 | 0.265791 |
| LINC00518   | 6p24.3        | -0.06856 | 0.181187 | 0.265791 |
| SLC66A2     | 18q23         | -0.06855 | 0.181198 | 0.265791 |
| PRXL2A      | 10q23.1       | -0.06853 | 0.18136  | 0.266009 |
| RPEL1       | 10q24.33      | 0.068517 | 0.181441 | 0.266102 |
| KCNS2       | 8q22.2        | 0.068515 | 0.18145  | 0.266102 |
| DNAJC16     | 1p36.21       | 0.068509 | 0.181492 | 0.266145 |
| GLMN        | 1p22.1        | -0.06845 | 0.181854 | 0.266656 |
| IGFBPL1     | 9p13.1        | 0.068441 | 0.181923 | 0.266738 |
| PAN3        | 13q12.2       | -0.06843 | 0.182004 | 0.266837 |
| ASAH2       | 10q11.23      | 0.068377 | 0.182339 | 0.267296 |
| FGL1        | 8p22          | 0.068376 | 0.182343 | 0.267296 |
| LMBRD1      | 6q13          | 0.06831  | 0.182769 | 0.267899 |
| RFK         | 9q21.13       | 0.068305 | 0.1828   | 0.267907 |
| LRRC4B      | 19q13.33      | 0.068305 | 0.1828   | 0.267907 |
| GALNT16     | 14q24.1       | 0.068298 | 0.182843 | 0.26795  |
| CCDC92      | 12q24.31      | -0.06827 | 0.183022 | 0.268192 |
| HTR3D       | 3q27.1        | -0.06823 | 0.18325  | 0.268485 |
| MME         | 3q25.2        | -0.06823 | 0.183254 | 0.268485 |
| ENPP5       | 6p21.1        | 0.068232 | 0.18327  | 0.268485 |
| PRM1        | 16p13.13      | -0.06823 | 0.183276 | 0.268485 |
| TGM2        | 20q11.23      | -0.06821 | 0.183423 | 0.268682 |
| PWAR1       | 15q11.2       | -0.0682  | 0.183449 | 0.2687   |
| AASDHPPT    | 11q22.3       | -0.06819 | 0.183558 | 0.26884  |
| ZNF441      | 19p13.2       | 0.068182 | 0.183587 | 0.268863 |
| MAP7D1      | 1p34.3        | 0.068176 | 0.18363  | 0.268906 |
| AASS        | 7q31.32       | 0.068138 | 0.18387  | 0.269238 |
| CIART       | 1q21.2        | -0.06813 | 0.183933 | 0.26931  |
| TTI2        | 8p12          | 0.068118 | 0.183999 | 0.269388 |
| TRIM13      | 13q14.2       | -0.06811 | 0.184074 | 0.269478 |
| MT4         | 16q13         | -0.0681  | 0.184141 | 0.269556 |
| EHMT1       | 9q34.3        | 0.068065 | 0.184345 | 0.269835 |
| PRAMEF10    | 1p36.21       | -0.06806 | 0.184364 | 0.269843 |
| VPREB1      | 22q11.22      | 0.068054 | 0.184413 | 0.269894 |
| CHIT1       | 1q32.1        | 0.068043 | 0.184486 | 0.269982 |

|              |             |          |          |          |
|--------------|-------------|----------|----------|----------|
| ZNF735       | 7q11.21     | -0.06804 | 0.184531 | 0.270028 |
| TERF1        | 8q21.11     | 0.068023 | 0.184617 | 0.270134 |
| CCL14        | 17q12       | 0.068001 | 0.184756 | 0.270304 |
| RPE          | 2q34        | -0.068   | 0.18476  | 0.270304 |
| KIF18A       | 11p14.1     | -0.06797 | 0.184961 | 0.270578 |
| TMEM230      | 20p13-p12.3 | -0.06795 | 0.185056 | 0.270697 |
| GPSM2        | 1p13.3      | -0.06795 | 0.185101 | 0.270743 |
| PLAAT2       | 11q12.3     | -0.06793 | 0.185231 | 0.270913 |
| POLI         | 18q21.2     | 0.06789  | 0.18548  | 0.271259 |
| TF           | 3q22.1      | -0.06788 | 0.185537 | 0.271321 |
| TXNDC15      | 5q31.1      | 0.067876 | 0.18557  | 0.27135  |
| C1ORF216     | 1p34.3      | -0.06786 | 0.185662 | 0.271465 |
| TREML5P      | 6p21.1      | 0.067857 | 0.185691 | 0.271487 |
| TMPRSS2      | 21q22.3     | 0.067852 | 0.185722 | 0.271513 |
| C15ORF62     | 15q15.1     | -0.06785 | 0.18576  | 0.271549 |
| RBFOX3       | 17q25.3     | -0.06781 | 0.185991 | 0.271867 |
| KDM2B        | 12q24.31    | -0.06777 | 0.186268 | 0.272252 |
| SLC66A1L     | 3q25.32     | 0.067721 | 0.186578 | 0.272685 |
| UBE2E1       | 3p24.2      | -0.06771 | 0.186622 | 0.272711 |
| PGRMC2       | 4q28.2      | 0.067714 | 0.186623 | 0.272711 |
| RBPMS        | 8p12        | 0.06771  | 0.186649 | 0.272728 |
| C1ORF210     | 1p34.2      | 0.067673 | 0.186892 | 0.273063 |
| LINC01734    | 20q12       | -0.06767 | 0.186909 | 0.273069 |
| PRDM16-DT    | 1p36.32     | -0.06766 | 0.186981 | 0.273154 |
| UBE2Z        | 17q21.32    | 0.067631 | 0.187167 | 0.273406 |
| RETN         | 19p13.2     | 0.067627 | 0.187193 | 0.273424 |
| BPIFB6       | 20q11.21    | 0.067597 | 0.187385 | 0.273684 |
| ZER1         | 9q34.11     | 0.067591 | 0.187425 | 0.273722 |
| AMN          | 14q32.32    | -0.06758 | 0.187471 | 0.27377  |
| HIST1H2BN    | 6p22.1      | -0.06757 | 0.18757  | 0.273895 |
| BCL7A        | 12q24.31    | -0.06756 | 0.187632 | 0.273965 |
| EXOC7        | 17q25.1     | -0.06756 | 0.187652 | 0.273974 |
| KRTAP5-10    | 11q13.4     | -0.06754 | 0.187777 | 0.274137 |
| ZFYVE28      | 4p16.3      | 0.067531 | 0.187819 | 0.274179 |
| ATP1A4       | 1q23.2      | 0.067515 | 0.187922 | 0.274305 |
| IFNA1        | 9p21.3      | 0.067513 | 0.187933 | 0.274305 |
| CERKL        | 2q31.3      | 0.067506 | 0.187982 | 0.274356 |
| PTPRR        | 12q15       | 0.067488 | 0.188104 | 0.274514 |
| SSX2IP       | 1p22.3      | -0.06748 | 0.188147 | 0.274557 |
| ATP8B3       | 19p13.3     | 0.067459 | 0.18829  | 0.274746 |
| KCNE3        | 11q13.4     | -0.06745 | 0.188346 | 0.274807 |
| VN1R1        | 19q13.43    | -0.06744 | 0.188389 | 0.27485  |
| RGPD8        | 2q14.1      | 0.067438 | 0.18843  | 0.274878 |
| IGF2-AS      | 11p15.5     | -0.06744 | 0.188436 | 0.274878 |
| SETD3        | 14q32.2     | 0.067433 | 0.188462 | 0.274896 |
| PITX2        | 4q25        | -0.06742 | 0.188531 | 0.274977 |
| DUSP26       | 8p12        | 0.06741  | 0.188613 | 0.275068 |
| SIRPA        | 20p13       | -0.06741 | 0.188629 | 0.275068 |
| POU4F1       | 13q31.1     | -0.06741 | 0.188634 | 0.275068 |
| C6ORF141     | 6p12.3      | -0.0674  | 0.188683 | 0.275119 |
| CEP63        | 3q22.2      | 0.067391 | 0.188738 | 0.275179 |
| LINC01300    | 8q24.3      | -0.06738 | 0.188787 | 0.27523  |
| IRF5         | 7q32.1      | -0.06737 | 0.18887  | 0.275328 |
| FRMPD2B      | 10q11.22    | 0.067367 | 0.188896 | 0.275328 |
| BRI3BP       | 12q24.31    | 0.067367 | 0.188898 | 0.275328 |
| LOC100129935 | 19q13.2     | -0.06736 | 0.188909 | 0.275328 |
| VPS26A       | 10q22.1     | 0.06734  | 0.189074 | 0.275536 |
| HR           | 8p21.3      | 0.067339 | 0.189079 | 0.275536 |



|            |          |          |          |          |
|------------|----------|----------|----------|----------|
| EPB41L4B   | 9q31.3   | 0.067337 | 0.189095 | 0.275539 |
| SYT14      | 1q32.2   | 0.067324 | 0.189177 | 0.275638 |
| NAT8       | 2p13.1   | -0.06731 | 0.189284 | 0.275774 |
| LHCGR      | 2p16.3   | -0.0673  | 0.189316 | 0.2758   |
| PRSS58     | 7q34     | 0.067265 | 0.18957  | 0.27615  |
| CYP2C19    | 10q23.33 | 0.067263 | 0.189584 | 0.27615  |
| PLG        | 6q26     | 0.06726  | 0.1896   | 0.276154 |
| ZNF621     | 3p22.1   | 0.067236 | 0.189759 | 0.276366 |
| HYKK       | 15q25.1  | -0.06722 | 0.189867 | 0.276503 |
| CALHM3     | 10q24.33 | 0.067209 | 0.189939 | 0.276588 |
| PNPLA6     | 19p13.2  | -0.0672  | 0.189974 | 0.276618 |
| LINC01634  | 22q11.21 | 0.06718  | 0.190131 | 0.276827 |
| B4GALT5    | 20q13.13 | 0.067123 | 0.190503 | 0.277349 |
| CTPS2      | Xp22.2   | -0.06712 | 0.190532 | 0.27737  |
| CPSF4L     | 17q25.1  | -0.06711 | 0.1906   | 0.277449 |
| LDHB       | 12p12.1  | -0.0671  | 0.190653 | 0.277506 |
| GFRA3      | 5q31.2   | 0.067085 | 0.190758 | 0.277639 |
| PURB       | 7p13     | 0.067029 | 0.191128 | 0.278158 |
| SLC2A14    | 12p13.31 | 0.067026 | 0.191145 | 0.278162 |
| PLAAT4     | 11q12.3  | -0.06698 | 0.191477 | 0.278625 |
| SLC30A8    | 8q24.11  | 0.06696  | 0.191588 | 0.278766 |
| SPTBN5     | 15q15.1  | -0.06692 | 0.191821 | 0.279064 |
| RTRAF      | 14q22.1  | -0.06692 | 0.191821 | 0.279064 |
| ALG13      | Xq23     | -0.06691 | 0.19192  | 0.279182 |
| ASB3       | 2p16.2   | 0.066909 | 0.19193  | 0.279182 |
| EMP3       | 19q13.33 | 0.066893 | 0.192033 | 0.27929  |
| LRPAP1     | 4p16.3   | -0.06689 | 0.192034 | 0.27929  |
| CHDH       | 3p21.1   | -0.06689 | 0.192046 | 0.27929  |
| SYNPO2L    | 10q22.2  | 0.066874 | 0.19216  | 0.279436 |
| FAM27E5    | 17p11.2  | -0.06687 | 0.192191 | 0.27946  |
| TAS2R1     | 5p15.31  | -0.06687 | 0.192211 | 0.279469 |
| DBN1       | 5q35.3   | 0.066853 | 0.192298 | 0.279575 |
| GABRB1     | 4p12     | 0.066851 | 0.192312 | 0.279575 |
| TRA2B      | 3q27.2   | -0.06685 | 0.192337 | 0.279591 |
| ARHGAP27P2 | 17q24.2  | 0.066841 | 0.192378 | 0.279632 |
| CSPG5      | 3p21.31  | 0.066827 | 0.192473 | 0.279738 |
| FZD9       | 7q11.23  | -0.06683 | 0.19248  | 0.279738 |
| TRIM17     | 1q42.13  | -0.06676 | 0.192893 | 0.280319 |
| KLK4       | 19q13.41 | -0.06675 | 0.193012 | 0.28046  |
| PTGR2      | 14q24.3  | -0.06675 | 0.193018 | 0.28046  |
| LRRC75A    | 17p11.2  | 0.066739 | 0.19306  | 0.280494 |
| THSD1      | 13q14.3  | 0.066738 | 0.19307  | 0.280494 |
| C2ORF42    | 2p13.3   | -0.06673 | 0.193104 | 0.280504 |
| NAAA       | 4q21.1   | 0.066732 | 0.193104 | 0.280504 |
| LRRC6      | 8q24.22  | -0.06673 | 0.193145 | 0.280542 |
| CCDC40     | 17q25.3  | -0.06672 | 0.193187 | 0.280582 |
| OR56A5     | 11p15.4  | 0.066697 | 0.193339 | 0.280784 |
| KCNV1      | 8q23.2   | 0.06669  | 0.193391 | 0.280839 |
| ACOT13     | 6p22.3   | -0.06668 | 0.193433 | 0.280879 |
| OR11H1     | 22q11.1  | -0.06667 | 0.193535 | 0.280986 |
| OR3A4P     | 17p13.3  | 0.066668 | 0.193535 | 0.280986 |
| OSTF1      | 9q21.13  | 0.066662 | 0.193574 | 0.281023 |
| ACTL7B     | 9q31.3   | -0.06666 | 0.193593 | 0.28103  |
| PPA2       | 4q24     | -0.0666  | 0.193961 | 0.281543 |
| ANGPT4     | 20p13    | 0.066597 | 0.194014 | 0.281586 |
| PTCH2      | 1p34.1   | 0.066594 | 0.194029 | 0.281586 |
| ANKAR      | 2q32.2   | 0.066593 | 0.19404  | 0.281586 |
| POLR3D     | 8p21.3   | 0.066592 | 0.194048 | 0.281586 |

|             |               |          |          |          |
|-------------|---------------|----------|----------|----------|
| NCAPG2      | 7q36.3        | -0.06659 | 0.194061 | 0.281586 |
| CC2D1B      | 1p32.3        | -0.06656 | 0.19425  | 0.28184  |
| PRINS       | 10p12.1       | -0.06655 | 0.19433  | 0.281936 |
| CATIP       | 2q35          | -0.06651 | 0.194628 | 0.282348 |
| PCP4L1      | 1q23.3        | 0.066495 | 0.1947   | 0.282432 |
| UNC5A       | 5q35.2        | 0.066491 | 0.194726 | 0.282449 |
| LRRC3       | 21q22.3       | 0.066474 | 0.19484  | 0.282579 |
| CYLC2       | 9q31.1        | -0.06647 | 0.194844 | 0.282579 |
| SORBS1      | 10q24.1       | 0.06646  | 0.194932 | 0.282675 |
| DRAM2       | 1p13.3        | -0.06646 | 0.194939 | 0.282675 |
| ETF1        | 5q31.2        | 0.066457 | 0.194952 | 0.282675 |
| CLDN23      | 8p23.1        | 0.066444 | 0.195039 | 0.282777 |
| FMR1        | Xq27.3        | -0.06644 | 0.195053 | 0.282777 |
| PCDHGB4     | 5q31.3        | 0.06644  | 0.195065 | 0.282777 |
| FGF20       | 8p22          | -0.06642 | 0.195192 | 0.282941 |
| TSSK3       | 1p35.1        | -0.06639 | 0.195426 | 0.28326  |
| EDN2        | 1p34.2        | 0.066384 | 0.195446 | 0.283268 |
| CWC27       | 5q12.3        | -0.06635 | 0.195662 | 0.283552 |
| LUZP4       | Xq23          | -0.06635 | 0.195671 | 0.283552 |
| STXBP5L     | 3q13.33       | 0.066345 | 0.195706 | 0.283584 |
| RAB3IL1     | 11q12.2-q12.3 | -0.06633 | 0.195806 | 0.283707 |
| APOL5       | 22q12.3       | 0.066327 | 0.195831 | 0.283723 |
| RAB34       | 17q11.2       | 0.066307 | 0.195966 | 0.283898 |
| MEGF6       | 1p36.32       | 0.066298 | 0.196027 | 0.283966 |
| RASL12      | 15q22.31      | 0.066289 | 0.196089 | 0.284016 |
| LAMB2P1     | 3p21.31       | 0.066287 | 0.196098 | 0.284016 |
| LHX8        | 1p31.1        | 0.066286 | 0.196104 | 0.284016 |
| EMC1        | 1p36.13       | 0.066265 | 0.196247 | 0.284202 |
| RABIF       | 1q32.1        | 0.066243 | 0.196397 | 0.284395 |
| MAGEC2      | Xq27.2        | -0.06624 | 0.196408 | 0.284395 |
| SLC17A2     | 6p22.2        | -0.06624 | 0.196433 | 0.28441  |
| SLCO4A1-AS1 | 20q13.33      | -0.06622 | 0.196522 | 0.284519 |
| FARP2       | 2q37.3        | 0.066222 | 0.196537 | 0.284519 |
| KIF6        | 6p21.2        | -0.06616 | 0.196957 | 0.285107 |
| CACNB3      | 12q13.12      | 0.066137 | 0.197118 | 0.285319 |
| ARHGEF25    | 12q13.3       | 0.066133 | 0.197145 | 0.285339 |
| RABL3       | 3q13.33       | 0.066122 | 0.197217 | 0.285422 |
| TGFBI       | 5q31.1        | 0.066117 | 0.197253 | 0.285437 |
| ARSK        | 5q15          | 0.066116 | 0.197256 | 0.285437 |
| ZNF75A      | 16p13.3       | -0.06611 | 0.197303 | 0.285484 |
| EML6        | 2p16.1        | -0.0661  | 0.197341 | 0.285519 |
| GUSBP2      | 6p22.2        | 0.066099 | 0.197371 | 0.285542 |
| SLC39A8     | 4q24          | 0.066096 | 0.197392 | 0.285552 |
| CELA3A      | 1p36.12       | -0.06609 | 0.197412 | 0.285556 |
| LOC642929   | 9q21.11       | -0.06609 | 0.197424 | 0.285556 |
| SOX7        | 8p23.1        | 0.066085 | 0.197467 | 0.285591 |
| TEX37       | 2p11.2        | -0.06608 | 0.197477 | 0.285591 |
| IL31RA      | 5q11.2        | 0.066063 | 0.19762  | 0.285778 |
| PTPRN2      | 7q36.3        | 0.066018 | 0.197927 | 0.286201 |
| LINC00689   | 7q36.3        | 0.065998 | 0.198062 | 0.286376 |
| SH3BP2      | 4p16.3        | 0.065986 | 0.198141 | 0.286469 |
| FAM120AOS   | 9q22.31       | 0.065984 | 0.198156 | 0.286469 |
| ELFN2       | 22q13.1       | 0.065949 | 0.198398 | 0.2868   |
| MTDH        | 8q22.1        | 0.065937 | 0.198475 | 0.286891 |
| TNFAIP2     | 14q32.32      | 0.065934 | 0.198495 | 0.286897 |
| P3H4        | 17q21.2       | -0.06593 | 0.198509 | 0.286898 |
| SPTSSA      | 14q13.1       | 0.065918 | 0.198608 | 0.28702  |
| DCX         | Xq23          | 0.06591  | 0.198662 | 0.287077 |

|               |              |          |          |          |
|---------------|--------------|----------|----------|----------|
| ICMT          | 1p36.31      | 0.065897 | 0.198752 | 0.287186 |
| ICA1          | 7p21.3       | -0.06589 | 0.198808 | 0.287246 |
| ZSCAN18       | 19q13.43     | -0.06588 | 0.198888 | 0.287342 |
| SLC46A2       | 9q32         | 0.06586  | 0.199    | 0.287483 |
| PABPC4        | 1p34.3       | -0.06581 | 0.199345 | 0.287953 |
| EGFEM1P       | 3q26.2       | 0.065809 | 0.199354 | 0.287953 |
| PRR5L         | 11p13-p12    | 0.065805 | 0.199376 | 0.287963 |
| CHAC1         | 15q15.1      | -0.0658  | 0.199414 | 0.287998 |
| DLGAP1-AS1    | 18p11.31     | -0.0658  | 0.199436 | 0.288009 |
| FAM71F2       | 7q32.1       | -0.06576 | 0.199664 | 0.288317 |
| OPRM1         | 6q25.2       | 0.065758 | 0.1997   | 0.288349 |
| SLC16A5       | 17q25.1      | -0.06575 | 0.199783 | 0.288438 |
| ASIC4         | 2q35         | -0.06574 | 0.199791 | 0.288438 |
| NMS           | 2q11.2       | -0.06574 | 0.199831 | 0.288476 |
| ALDOC         | 17q11.2      | -0.06572 | 0.19993  | 0.288598 |
| DTX3          | 12q13.3      | 0.065718 | 0.199976 | 0.288643 |
| GULP1         | 2q32.1-q32.2 | 0.065713 | 0.20001  | 0.288671 |
| APC2          | 19p13.3      | 0.065708 | 0.200041 | 0.288689 |
| BBIP1         | 10q25.2      | -0.06571 | 0.200051 | 0.288689 |
| SAMM50        | 22q13.31     | -0.0657  | 0.200066 | 0.28869  |
| MAP3K14-AS1   | 17q21.31     | 0.065699 | 0.200104 | 0.288724 |
| SLCO1B7       | 12p12.2      | 0.065685 | 0.200198 | 0.288838 |
| LALBA         | 12q13.11     | -0.06567 | 0.200337 | 0.289019 |
| TEDDM1        | 1q25.3       | 0.065657 | 0.200392 | 0.289076 |
| POM121L8P     | 22q11.21     | 0.065652 | 0.200426 | 0.289104 |
| OR7A5         | 19p13.12     | 0.065635 | 0.200543 | 0.289252 |
| MATK          | 19p13.3      | 0.065621 | 0.200641 | 0.289371 |
| TTPA          | 8q12.3       | -0.06562 | 0.200654 | 0.289371 |
| DKFZP586I1420 | 7p14.3       | -0.0656  | 0.200767 | 0.289514 |
| GRIN2B        | 12p13.1      | 0.065595 | 0.200817 | 0.289564 |
| ALOXE3        | 17p13.1      | 0.06556  | 0.201059 | 0.289892 |
| SRSF10        | 1p36.11      | -0.06556 | 0.201086 | 0.28991  |
| NDUFA4L2      | 12q13.3      | -0.06553 | 0.201293 | 0.290189 |
| ERI2          | 16p12.3      | 0.065503 | 0.201454 | 0.290378 |
| CAPN12        | 19q13.2      | -0.0655  | 0.201454 | 0.290378 |
| MAPK9         | 5q35.3       | 0.065485 | 0.201579 | 0.290538 |
| GLT8D1        | 3p21.1       | -0.06548 | 0.201605 | 0.290555 |
| LIPJ          | 10q23.31     | 0.065465 | 0.201717 | 0.290694 |
| GAB4          | 22q11.1      | 0.065448 | 0.201831 | 0.290839 |
| CALHM6        | 6q22.1       | 0.065445 | 0.201852 | 0.290847 |
| SLC20A1       | 2q14.1       | 0.065441 | 0.20188  | 0.290867 |
| SESN2         | 1p35.3       | 0.065424 | 0.202001 | 0.29102  |
| SLC6A8        | Xq28         | 0.065393 | 0.20221  | 0.291301 |
| ST7-AS2       | 7q31.2       | 0.065365 | 0.202409 | 0.291566 |
| TDRD10        | 1q21.3       | 0.065345 | 0.202546 | 0.291743 |
| SHANK3        | 22q13.33     | 0.065329 | 0.202657 | 0.291882 |
| MELTF         | 3q29         | 0.065312 | 0.202777 | 0.292033 |
| MYO7A         | 11q13.5      | -0.0653  | 0.202847 | 0.292107 |
| HNRNPM        | 19p13.2      | 0.0653   | 0.202857 | 0.292107 |
| BFSP2         | 3q22.1       | 0.065286 | 0.202954 | 0.292225 |
| ALDOB         | 9q31.1       | 0.065279 | 0.203005 | 0.292261 |
| TAGLN         | 11q23.3      | 0.065278 | 0.203008 | 0.292261 |
| TRIM46        | 1q22         | 0.065272 | 0.203048 | 0.292298 |
| PIK3CD-AS1    | 1p36.22      | 0.065269 | 0.203069 | 0.292307 |
| ADCK2         | 7q34         | -0.06527 | 0.203086 | 0.29231  |
| UBN2          | 7q34         | 0.065246 | 0.20323  | 0.292497 |
| ARFGEF2       | 20q13.13     | 0.06524  | 0.203271 | 0.292528 |
| ARHGAP6       | Xp22.2       | 0.065239 | 0.203281 | 0.292528 |

|           |               |          |          |          |
|-----------|---------------|----------|----------|----------|
| PRR34     | 22q13.31      | 0.065222 | 0.203396 | 0.292656 |
| ZNF248    | 10p11.21      | -0.06522 | 0.203399 | 0.292656 |
| CSRNP2    | 12q13.12      | 0.065204 | 0.20352  | 0.292809 |
| FADS2     | 11q12.2       | 0.065199 | 0.203555 | 0.292838 |
| NT5C1A    | 1p34.2        | 0.065179 | 0.203694 | 0.293    |
| AASDH     | 4q12          | 0.065179 | 0.203697 | 0.293    |
| M6PR      | 12p13.31      | 0.065176 | 0.203719 | 0.293011 |
| RNASE9    | 14q11.2       | -0.06517 | 0.203759 | 0.293048 |
| ACP7      | 19q13.2       | -0.06516 | 0.203796 | 0.293079 |
| NHLH1     | 1q23.2        | -0.06515 | 0.203928 | 0.293247 |
| LYPD6B    | 2q23.2        | -0.06514 | 0.204002 | 0.293334 |
| TXNDC2    | 18p11.22      | 0.065127 | 0.20406  | 0.293395 |
| SNORA29   | 6q25.3        | -0.06512 | 0.204136 | 0.293484 |
| PLOD1     | 1p36.22       | -0.0651  | 0.204263 | 0.293646 |
| ZNF71     | 19q13.43      | -0.06508 | 0.204413 | 0.29384  |
| CASC3     | 17q21.1       | 0.06506  | 0.204529 | 0.293984 |
| ZNF84     | 12q24.33      | -0.06506 | 0.204542 | 0.293984 |
| KRT20     | 17q21.2       | 0.06504  | 0.204667 | 0.294142 |
| CALB2     | 16q22.2       | 0.065035 | 0.204702 | 0.294162 |
| C6        | 5p13.1        | 0.065033 | 0.20471  | 0.294162 |
| CFAP221   | 2q14.2        | 0.065024 | 0.204776 | 0.294235 |
| IGFALS    | 16p13.3       | 0.06501  | 0.204871 | 0.294341 |
| ZNF256    | 19q13.43      | -0.06501 | 0.204879 | 0.294341 |
| PRRG1     | Xp21.1        | 0.065004 | 0.204916 | 0.294373 |
| ZFP82     | 19q13.12      | 0.064987 | 0.205032 | 0.294519 |
| VSX2      | 14q24.3       | 0.064978 | 0.205101 | 0.294596 |
| LINC02347 | 12q24.32      | 0.064958 | 0.205238 | 0.294772 |
| ABCA13    | 7p12.3        | 0.064939 | 0.205369 | 0.294939 |
| SERPINB12 | 18q21.33      | 0.064935 | 0.205399 | 0.294961 |
| TSPAN4    | 11p15.5       | 0.064928 | 0.205446 | 0.295007 |
| DSTN      | 20p12.1       | 0.064923 | 0.205479 | 0.295034 |
| SNORA20   | 6q25.3        | -0.06492 | 0.205528 | 0.295083 |
| SCGB3A1   | 5q35.3        | -0.06491 | 0.205595 | 0.295158 |
| BEAN1     | 16q21         | 0.064899 | 0.205653 | 0.29522  |
| MMP1      | 11q22.2       | 0.064895 | 0.205679 | 0.295237 |
| C1QL1     | 17q21.31      | -0.06487 | 0.205871 | 0.29549  |
| ZBTB18    | 1q44          | 0.064857 | 0.205942 | 0.295571 |
| BACE2     | 21q22.2-q22.3 | 0.064841 | 0.206059 | 0.295719 |
| OR52H1    | 11p15.4       | -0.06483 | 0.206111 | 0.295771 |
| CUL2      | 10p11.21      | 0.064818 | 0.206216 | 0.295901 |
| PLIN5     | 19p13.3       | -0.06481 | 0.206304 | 0.296006 |
| CCN5      | 20q13.12      | 0.0648   | 0.206341 | 0.296037 |
| GPR146    | 7p22.3        | 0.064797 | 0.206364 | 0.29605  |
| TEX35     | 1q25.2        | 0.064794 | 0.206386 | 0.29606  |
| INE1      | Xp11.3        | -0.06477 | 0.206557 | 0.296284 |
| NIPSNAP1  | 22q12.2       | -0.06476 | 0.206632 | 0.29637  |
| TPRX1     | 19q13.33      | 0.064753 | 0.206672 | 0.296407 |
| C17ORF100 | 17p13.1       | -0.06474 | 0.206788 | 0.296551 |
| CHRNA2    | 8p21.2        | -0.06472 | 0.206904 | 0.296688 |
| CABP2     | 11q13.2       | -0.06472 | 0.206913 | 0.296688 |
| AMY1A     | 1p21.1        | -0.06472 | 0.206929 | 0.29669  |
| DPY19L1   | 7p14.2        | 0.064702 | 0.207036 | 0.296822 |
| CENPL     | 1q25.1        | 0.064691 | 0.207113 | 0.296912 |
| DHCR24    | 1p32.3        | 0.064671 | 0.207248 | 0.297069 |
| HSPA8     | 11q24.1       | 0.064671 | 0.207253 | 0.297069 |
| SBF1      | 22q13.33      | 0.064669 | 0.207268 | 0.297069 |
| TMEM233   | 12q24.23      | 0.064664 | 0.207302 | 0.297098 |
| MT1DP     | 16q13         | -0.06462 | 0.207596 | 0.297498 |

|                        |               |          |          |          |
|------------------------|---------------|----------|----------|----------|
| GATA3-AS1              | 10p14         | -0.06458 | 0.207881 | 0.297878 |
| CLEC2A                 | 12p13.31      | -0.06458 | 0.207898 | 0.297878 |
| ONECUT2                | 18q21.31      | 0.064578 | 0.207906 | 0.297878 |
| CT55                   | Xq26.3        | -0.06457 | 0.207953 | 0.297908 |
| SRPRA                  | 11q24.2       | 0.064571 | 0.207958 | 0.297908 |
| THTPA                  | 14q11.2       | -0.06457 | 0.207972 | 0.297908 |
| STK38                  | 6p21.31       | -0.06456 | 0.208001 | 0.297928 |
| FUT7                   | 9q34.3        | -0.06455 | 0.20811  | 0.298043 |
| NIPSNAP3B              | 9q31.1        | 0.064549 | 0.208111 | 0.298043 |
| SLC6A20                | 3p21.31       | -0.06455 | 0.208136 | 0.298043 |
| VGLL2                  | 6q22.1        | -0.06454 | 0.20814  | 0.298043 |
| OR2L2                  | 1q44          | -0.06451 | 0.208364 | 0.298342 |
| HIST1H3C               | 6p22.2        | -0.06451 | 0.208384 | 0.298349 |
| GDF7                   | 2p24.1        | 0.064501 | 0.208448 | 0.298413 |
| MOV10                  | 1p13.2        | -0.0645  | 0.208458 | 0.298413 |
| SIAH1                  | 16q12.1       | -0.06447 | 0.208684 | 0.298712 |
| LOC100129534           | 1p36.32       | 0.064466 | 0.208697 | 0.298712 |
| UBC                    | 12q24.31      | -0.06446 | 0.208731 | 0.298739 |
| TRIM11                 | 1q42.13       | -0.06444 | 0.208914 | 0.298979 |
| FERMT1                 | 20p12.3       | 0.064419 | 0.20903  | 0.299124 |
| VTI1A                  | 10q25.2       | 0.064412 | 0.209083 | 0.299179 |
| ADRA1D                 | 20p13         | -0.06441 | 0.209115 | 0.299203 |
| CLSTN2                 | 3q23          | 0.064405 | 0.209131 | 0.299204 |
| TMEM30CP               | 3q12.1        | -0.06437 | 0.209377 | 0.299535 |
| SPHAR                  | 1q42.13       | 0.064368 | 0.209393 | 0.299536 |
| GLIS1                  | 1p32.3        | 0.064364 | 0.209421 | 0.299555 |
| AKR1C6P                | 10p15.1       | -0.06435 | 0.209522 | 0.299679 |
| OR51G1                 | 11p15.4       | -0.06435 | 0.209553 | 0.299693 |
| COX7A1                 | 19q13.12      | -0.06434 | 0.209562 | 0.299693 |
| KRT79                  | 12q13.13      | -0.06434 | 0.209622 | 0.299758 |
| ELF4                   | Xq26.1        | 0.064326 | 0.209692 | 0.299836 |
| LOC392196              | 8p23.1        | 0.064307 | 0.209823 | 0.300001 |
| LTA4H                  | 12q23.1       | -0.0643  | 0.209842 | 0.300007 |
| PANX2                  | 22q13.33      | -0.06429 | 0.209936 | 0.300121 |
| MEIS3                  | 19q13.32      | 0.064274 | 0.210062 | 0.300279 |
| B3GNT4                 | 12q24.31      | -0.06425 | 0.210226 | 0.300492 |
| OLIG1                  | 21q22.11      | 0.06422  | 0.210442 | 0.300779 |
| CDKL2                  | 4q21.1        | 0.06421  | 0.210514 | 0.300862 |
| LSS                    | 21q22.3       | 0.064206 | 0.210542 | 0.300868 |
| HMG2N2P46              | 15q21.1       | 0.064205 | 0.210549 | 0.300868 |
| TMEM196                | 7p21.1        | 0.064176 | 0.210756 | 0.301142 |
| LINC00482              | 17q25.3       | 0.064172 | 0.210785 | 0.301163 |
| ART4                   | 12p12.3       | 0.064156 | 0.210898 | 0.301303 |
| PRAMEF6                | 1p36.21       | 0.064135 | 0.211049 | 0.301496 |
| FXR1                   | 3q26.33       | 0.064132 | 0.211068 | 0.301503 |
| TMED3                  | 15q25.1       | 0.064111 | 0.211218 | 0.30168  |
| NGEF                   | 2q37.1        | -0.06411 | 0.211223 | 0.30168  |
| CCDC102B               | 18q22.1-q22.2 | 0.064106 | 0.211254 | 0.301703 |
| POM121C                | 7q11.23       | 0.064081 | 0.211437 | 0.301943 |
| CA6                    | 1p36.23       | 0.064077 | 0.211464 | 0.30196  |
| CRB1                   | 1q31.3        | 0.064073 | 0.211492 | 0.301978 |
| RUSC1-AS1              | 1q22          | -0.06407 | 0.211509 | 0.301981 |
| CNIH2                  | 11q13.2       | -0.06405 | 0.211655 | 0.302162 |
| ARPC2                  | 2q35          | 0.064048 | 0.211667 | 0.302162 |
| DTX2P1-UPK3BP1-PMS2P11 | 7q11.23       | -0.06405 | 0.211681 | 0.302162 |
| PDIA6                  | 2p25.1        | -0.06404 | 0.211704 | 0.302163 |
| CCL18                  | 17q12         | 0.064042 | 0.211712 | 0.302163 |
| MYCBPAP                | 17q21.33      | 0.064023 | 0.211852 | 0.302342 |

|                 |          |          |          |          |
|-----------------|----------|----------|----------|----------|
| ZNF510          | 9q22.33  | 0.064015 | 0.211904 | 0.302395 |
| VN1R2           | 19q13.42 | 0.063942 | 0.212426 | 0.303117 |
| KIAA1143        | 3p21.31  | 0.06394  | 0.212445 | 0.303123 |
| APLN            | Xq26.1   | -0.06391 | 0.212657 | 0.303403 |
| DMP1            | 4q22.1   | -0.0639  | 0.212738 | 0.303481 |
| FGF8            | 10q24.32 | -0.0639  | 0.212742 | 0.303481 |
| LTBP3           | 11q13.1  | 0.063881 | 0.212867 | 0.30362  |
| OR5AC2          | 3q11.2   | -0.06388 | 0.212869 | 0.30362  |
| AGXT2           | 5p13.2   | -0.06387 | 0.212941 | 0.303701 |
| ZC3H6           | 2q14.1   | 0.063859 | 0.213023 | 0.303796 |
| HLA-G           | 6p22.1   | 0.063846 | 0.213119 | 0.303911 |
| RERGL           | 12p12.3  | 0.063822 | 0.213289 | 0.304132 |
| CERK            | 22q13.31 | -0.06381 | 0.213395 | 0.304263 |
| MARK2           | 11q13.1  | 0.063803 | 0.213423 | 0.304281 |
| PAX8            | 2q14.1   | -0.06377 | 0.213675 | 0.304618 |
| MS4A10          | 11q12.2  | 0.063766 | 0.213693 | 0.304621 |
| LL22NC03-63E9.3 | 22q11.22 | -0.06375 | 0.213831 | 0.304788 |
| FAM71D          | 14q23.3  | -0.06375 | 0.21384  | 0.304788 |
| LILRA5          | 19q13.42 | 0.063722 | 0.214007 | 0.305005 |
| ABHD10          | 3q13.2   | -0.06371 | 0.214108 | 0.305127 |
| ADAM7           | 8p21.2   | -0.0637  | 0.214199 | 0.305234 |
| ATP2C2          | 16q24.1  | 0.063687 | 0.21426  | 0.3053   |
| ADAM11          | 17q21.31 | -0.06368 | 0.214315 | 0.305337 |
| KRTAP12-2       | 21q22.3  | -0.06368 | 0.214316 | 0.305337 |
| BPI             | 20q11.23 | -0.06366 | 0.214459 | 0.305518 |
| GIPC1           | 19p13.12 | -0.06365 | 0.21456  | 0.305625 |
| TTY13           | Yq11.223 | 0.063645 | 0.214565 | 0.305625 |
| CHIA            | 1p13.2   | -0.06363 | 0.214707 | 0.305806 |
| P2RX6           | 22q11.21 | -0.06362 | 0.214745 | 0.305825 |
| ATG13           | 11p11.2  | 0.063619 | 0.214751 | 0.305825 |
| CASKIN2         | 17q25.1  | 0.063606 | 0.214849 | 0.305943 |
| LINC00114       | 21q22.2  | -0.0636  | 0.214889 | 0.305979 |
| MIR4697HG       | 11q25    | 0.063592 | 0.214947 | 0.306026 |
| TMEM92          | 17q21.33 | 0.063591 | 0.214953 | 0.306026 |
| KCTD5           | 16p13.3  | -0.06359 | 0.214991 | 0.306058 |
| IL3             | 5q31.1   | -0.06358 | 0.215041 | 0.306096 |
| FANCD2OS        | 3p25.3   | 0.063578 | 0.215048 | 0.306096 |
| ZNF555          | 19p13.3  | -0.06357 | 0.215132 | 0.306194 |
| CMYA5           | 5q14.1   | 0.063551 | 0.215243 | 0.30633  |
| ZNF134          | 19q13.43 | 0.063539 | 0.215329 | 0.30643  |
| CEP78           | 9q21.2   | -0.06349 | 0.2157   | 0.30693  |
| NTF4            | 19q13.33 | -0.06349 | 0.215711 | 0.30693  |
| H3F3C           | 12p11.21 | 0.063471 | 0.215824 | 0.30707  |
| MAJIN           | 11q13.1  | -0.06346 | 0.215908 | 0.307168 |
| PPP1R10         | 6p21.33  | 0.063456 | 0.215934 | 0.307182 |
| CAAP1           | 9p21.2   | 0.063441 | 0.216041 | 0.307313 |
| KLRK1           | 12p13.2  | 0.063436 | 0.216076 | 0.307323 |
| OR1Q1           | 9q33.2   | -0.06344 | 0.216079 | 0.307323 |
| RCCD1           | 15q26.1  | -0.06343 | 0.216141 | 0.30739  |
| HIST1H2AA       | 6p22.2   | -0.06342 | 0.216222 | 0.307457 |
| LINC00293       | 8q11.1   | -0.06342 | 0.216222 | 0.307457 |
| RHOBTB1         | 10q21.2  | 0.063414 | 0.216235 | 0.307457 |
| GPR135          | 14q23.1  | 0.063388 | 0.216423 | 0.307702 |
| SPATA3          | 2q37.1   | -0.06337 | 0.216563 | 0.30788  |
| SPANXN5         | Xp11.22  | -0.06336 | 0.21661  | 0.307926 |
| BLOC1S2         | 10q24.31 | -0.06336 | 0.216649 | 0.307959 |
| POMT2           | 14q24.3  | 0.063344 | 0.216742 | 0.308068 |
| SPANXN2         | Xq27.3   | 0.063334 | 0.216814 | 0.30813  |

|             |              |          |          |          |
|-------------|--------------|----------|----------|----------|
| RAD51AP2    | 2p24.2       | -0.06333 | 0.216816 | 0.30813  |
| SNORA38B    | 17q24.2      | -0.06332 | 0.216893 | 0.308218 |
| FANCC       | 9q22.32      | -0.06331 | 0.21697  | 0.308306 |
| ZNF680      | 7q11.21      | -0.0633  | 0.217067 | 0.308422 |
| PCDHA11     | 5q31.3       | 0.063292 | 0.217123 | 0.30848  |
| XKR7        | 20q11.21     | 0.063279 | 0.217219 | 0.308594 |
| IDH1        | 2q34         | 0.063276 | 0.217243 | 0.308606 |
| NHLH2       | 1p13.1       | 0.063265 | 0.21732  | 0.308692 |
| LHFPL3      | 7q22.2-q22.3 | 0.063263 | 0.217334 | 0.308692 |
| ALG11       | 13q14.3      | -0.06325 | 0.217434 | 0.308805 |
| RPGRIP1L    | 16q12.2      | 0.063248 | 0.217445 | 0.308805 |
| ERG28       | 14q24.3      | -0.06322 | 0.217613 | 0.309022 |
| CLRN1       | 3q25.1       | 0.063219 | 0.217656 | 0.309061 |
| HIST1H4L    | 6p22.1       | -0.06319 | 0.217841 | 0.309302 |
| LINC00028   | 20q11.21     | 0.063191 | 0.217859 | 0.309305 |
| HIST1H2BJ   | 6p22.1       | -0.06317 | 0.218015 | 0.309505 |
| PALB2       | 16p12.2      | -0.06316 | 0.218119 | 0.30963  |
| NOCT        | 4q31.1       | 0.063138 | 0.218243 | 0.309785 |
| AIFM3       | 22q11.21     | -0.06312 | 0.218374 | 0.309948 |
| PBOV1       | 6q23.3       | 0.063118 | 0.218395 | 0.309956 |
| RINL        | 19q13.2      | 0.063109 | 0.218459 | 0.310025 |
| EIF2S1      | 14q23.3      | 0.063103 | 0.218501 | 0.310063 |
| OR2A7       | 7q35         | 0.063101 | 0.21852  | 0.310068 |
| OPRK1       | 8q11.23      | 0.063083 | 0.218651 | 0.310232 |
| SLC16A13    | 17p13.1      | 0.063073 | 0.21872  | 0.310297 |
| ANKRD20A11P | 21q11.2      | -0.06307 | 0.218728 | 0.310297 |
| NEIL1       | 15q24.2      | -0.06306 | 0.218822 | 0.310409 |
| RMC1        | 18q11.2      | 0.063044 | 0.218934 | 0.310546 |
| SOHLH2      | 13q13.3      | 0.063033 | 0.219011 | 0.310632 |
| CTNNA2      | 2p12         | 0.063018 | 0.219121 | 0.310766 |
| PGF         | 14q24.3      | -0.06301 | 0.21919  | 0.310842 |
| SPAG1       | 8q22.2       | 0.063    | 0.219253 | 0.31091  |
| CYP11B1     | 8q24.3       | 0.062972 | 0.219458 | 0.311178 |
| NBEAL2      | 3p21.31      | 0.06297  | 0.219475 | 0.311181 |
| HOXD4       | 2q31.1       | 0.062966 | 0.219506 | 0.311202 |
| FBXO25      | 8p23.3       | 0.062959 | 0.219554 | 0.311249 |
| CYP3A7      | 7q22.1       | 0.062953 | 0.219601 | 0.311293 |
| PRR25       | 16p13.3      | -0.06293 | 0.219756 | 0.311491 |
| IPO13       | 1p34.1       | -0.06292 | 0.219834 | 0.31158  |
| TCP10       | 6q27         | -0.06291 | 0.219929 | 0.311681 |
| ARID3C      | 9p13.3       | -0.06291 | 0.219939 | 0.311681 |
| PER3        | 1p36.23      | 0.062905 | 0.219953 | 0.311681 |
| ERLIN2      | 8p11.23      | 0.062855 | 0.22032  | 0.31218  |
| TFF3        | 21q22.3      | 0.062852 | 0.220342 | 0.312183 |
| TBC1D22B    | 6p21.2       | -0.06285 | 0.220361 | 0.312183 |
| SLC46A3     | 13q12.3      | 0.062848 | 0.220369 | 0.312183 |
| CBWD1       | 9p24.3       | -0.06283 | 0.220489 | 0.312331 |
| DISC2       | 1q42.2       | -0.0628  | 0.220701 | 0.31261  |
| GGT8P       | 2p11.2       | 0.062774 | 0.220919 | 0.312896 |
| CCAR1       | 10q21.3      | 0.062761 | 0.221016 | 0.313002 |
| THAP10      | 15q23        | 0.062759 | 0.221025 | 0.313002 |
| SHC2        | 19p13.3      | 0.062747 | 0.221117 | 0.31311  |
| LINC00312   | 3p25.3       | 0.062745 | 0.221133 | 0.313111 |
| ASPHD1      | 16p11.2      | -0.06273 | 0.221246 | 0.313248 |
| C16ORF78    | 16q12.1      | -0.06272 | 0.221329 | 0.313344 |
| DLEU2L      | 1p31.3       | -0.06271 | 0.221373 | 0.313383 |
| QSER1       | 11p13        | 0.062692 | 0.221523 | 0.313573 |
| HLA-L       | 6p22.1       | -0.06268 | 0.221577 | 0.313621 |

|          |                |          |          |          |
|----------|----------------|----------|----------|----------|
| DCSTAMP  | 8q22.3         | 0.062683 | 0.221588 | 0.313621 |
| CPA1     | 7q32.2         | -0.06267 | 0.221679 | 0.313728 |
| ZBTB33   | Xq24           | 0.062662 | 0.221747 | 0.313802 |
| OR1J4    | 9q33.2         | -0.06263 | 0.221984 | 0.314115 |
| SPAG17   | 1p12           | -0.06261 | 0.222111 | 0.314273 |
| MED20    | 6p21.1         | -0.06261 | 0.222161 | 0.314321 |
| ZFYVE19  | 15q15.1        | 0.062597 | 0.222226 | 0.314391 |
| UCK2     | 1q24.1         | -0.06259 | 0.222255 | 0.314409 |
| C1QL4    | 12q13.12       | -0.06257 | 0.222401 | 0.314594 |
| KRTAP9-8 | 17q21.2        | -0.06256 | 0.222488 | 0.314695 |
| MUC17    | 7q22.1         | 0.062557 | 0.222519 | 0.314717 |
| EXOG     | 3p22.2         | -0.06255 | 0.222572 | 0.31475  |
| DIO1     | 1p32.3         | -0.06255 | 0.222574 | 0.31475  |
| CTNNA1   | 9q31.3         | -0.06254 | 0.222618 | 0.31479  |
| GALNT18  | 11p15.4        | -0.06254 | 0.222639 | 0.314797 |
| OR51B5   | 11p15.4        | -0.06253 | 0.222724 | 0.314895 |
| FNDC8    | 17q12          | -0.06252 | 0.222779 | 0.314951 |
| SNAR-C3  | 19q13.33       | 0.062487 | 0.223041 | 0.315291 |
| IKKB     | 8p11.21        | -0.06248 | 0.223059 | 0.315291 |
| ZNF615   | 19q13.41       | 0.062483 | 0.223067 | 0.315291 |
| SERINC2  | 1p35.2         | -0.06246 | 0.223209 | 0.31547  |
| SLC30A10 | 1q41           | 0.062461 | 0.223234 | 0.315483 |
| GRAP     | 17p11.2        | -0.06246 | 0.223274 | 0.315518 |
| HOXA1    | 7p15.2         | -0.06244 | 0.223367 | 0.315626 |
| HSD17B11 | 4q22.1         | 0.062436 | 0.22342  | 0.315679 |
| EPB42    | 15q15.2        | 0.062433 | 0.223443 | 0.315689 |
| TIGAR    | 12p13.32       | 0.062415 | 0.223574 | 0.315851 |
| WIZ      | 19p13.12       | -0.0624  | 0.22365  | 0.315937 |
| DROSHA   | 5p13.3         | 0.062395 | 0.223724 | 0.316019 |
| FASTKD2  | 2q33.3         | -0.06239 | 0.223753 | 0.316038 |
| COL9A2   | 1p34.2         | 0.062371 | 0.223903 | 0.316228 |
| CPXM1    | 20p13          | 0.062363 | 0.223963 | 0.316289 |
| ZNF566   | 19q13.12       | -0.06235 | 0.224034 | 0.316362 |
| SEMA4F   | 2p13.1         | -0.06235 | 0.224046 | 0.316362 |
| TMEM241  | 18q11.2        | -0.06235 | 0.224078 | 0.316385 |
| SERF2    | 15q15.3        | -0.06234 | 0.224161 | 0.316481 |
| CXORF51A | Xq27.3         | -0.06233 | 0.224177 | 0.316481 |
| DHRS7C   | 17p13.1        | 0.062329 | 0.224212 | 0.316508 |
| LCE3E    | 1q21.3         | -0.06232 | 0.224258 | 0.316532 |
| EMP2     | 16p13.13       | 0.062323 | 0.224261 | 0.316532 |
| FAM184B  | 4p15.32-p15.31 | 0.062258 | 0.224742 | 0.317189 |
| RNASE3   | 14q11.2        | 0.062242 | 0.224865 | 0.317326 |
| SRPK3    | Xq28           | -0.06224 | 0.224871 | 0.317326 |
| APOC4    | 19q13.32       | 0.062217 | 0.225048 | 0.317553 |
| SH2D6    | 2p11.2         | 0.062197 | 0.225196 | 0.317739 |
| BUB3     | 10q26.13       | -0.06219 | 0.225263 | 0.317812 |
| TDRD7    | 9q22.33        | 0.062181 | 0.225321 | 0.317871 |
| FGF9     | 13q12.11       | 0.062136 | 0.225654 | 0.318319 |
| DEFA6    | 8p23.1         | -0.06213 | 0.225711 | 0.318376 |
| OR10H5   | 19p13.12       | -0.06212 | 0.225748 | 0.318406 |
| GPRC5C   | 17q25.1        | -0.06212 | 0.225794 | 0.318449 |
| EPHA6    | 3q11.2         | 0.062106 | 0.225881 | 0.318549 |
| ZNF564   | 19p13.2        | 0.06209  | 0.225997 | 0.318675 |
| ARHGEF16 | 1p36.32        | -0.06209 | 0.226002 | 0.318675 |
| WT1-AS   | 11p13          | -0.06208 | 0.226073 | 0.318753 |
| C6ORF132 | 6p21.1         | 0.062058 | 0.226243 | 0.318969 |
| SH3BGRL3 | 1p36.11        | -0.06204 | 0.226369 | 0.319124 |
| SLC18B1  | 6q23.2         | 0.062035 | 0.22641  | 0.319161 |



|             |          |          |          |          |
|-------------|----------|----------|----------|----------|
| ADAM15      | 1q21.3   | -0.06203 | 0.226472 | 0.319225 |
| C2CD4C      | 19p13.3  | 0.062012 | 0.226586 | 0.319363 |
| CD24        | 6q21     | 0.062007 | 0.226619 | 0.319387 |
| CPNE9       | 3p25.3   | -0.06198 | 0.226846 | 0.319685 |
| ZNF304      | 19q13.43 | 0.061971 | 0.226894 | 0.31973  |
| TCF25       | 16q24.3  | -0.06197 | 0.226919 | 0.319744 |
| RALYL       | 8q21.2   | 0.061961 | 0.22697  | 0.319793 |
| HNF1A-AS1   | 12q24.31 | -0.06194 | 0.227154 | 0.320029 |
| ZSCAN26     | 6p22.1   | -0.06192 | 0.227287 | 0.320194 |
| UPRT        | Xq13.3   | -0.06191 | 0.227386 | 0.32031  |
| HLA-A       | 6p22.1   | -0.06189 | 0.227488 | 0.320431 |
| COL25A1     | 4q25     | 0.061841 | 0.227872 | 0.32095  |
| EAPP        | 14q13.1  | 0.061826 | 0.227984 | 0.321081 |
| GZF1        | 20p11.21 | -0.06182 | 0.227997 | 0.321081 |
| RNF123      | 3p21.31  | -0.06182 | 0.228052 | 0.321136 |
| SNORA5C     | 7p13     | -0.06181 | 0.228085 | 0.321161 |
| ZDHHC8P1    | 22q11.23 | -0.06181 | 0.228122 | 0.321189 |
| TMEM105     | 17q25.3  | -0.0618  | 0.2282   | 0.321276 |
| SRSF5       | 14q24.1  | -0.06178 | 0.228362 | 0.321464 |
| PRL         | 6p22.3   | 0.061774 | 0.228378 | 0.321464 |
| IFIT1       | 10q23.31 | 0.061773 | 0.228381 | 0.321464 |
| GUCA1A      | 6p21.1   | 0.061757 | 0.228503 | 0.321612 |
| SHCBP1      | 16q11.2  | 0.061752 | 0.228544 | 0.321648 |
| MYO16       | 13q33.3  | 0.061748 | 0.228574 | 0.32166  |
| SMO         | 7q32.1   | -0.06175 | 0.228593 | 0.32166  |
| ARL6IP6     | 2q23.3   | 0.061744 | 0.228601 | 0.32166  |
| NAT2        | 8p22     | 0.061737 | 0.228652 | 0.32171  |
| BPESC1      | 3q23     | -0.06173 | 0.228743 | 0.321815 |
| CARNS1      | 11q13.2  | -0.06172 | 0.228798 | 0.321847 |
| DHX58       | 17q21.2  | 0.061718 | 0.228798 | 0.321847 |
| BSN         | 3p21.31  | 0.061713 | 0.228837 | 0.321879 |
| KIAA1549    | 7q34     | 0.061695 | 0.228972 | 0.322044 |
| SPATA31C1   | 9q22.1   | 0.061693 | 0.228986 | 0.322044 |
| IP6K3       | 6p21.31  | 0.061682 | 0.229073 | 0.322143 |
| RAPGEF4-AS1 | 2q31.1   | -0.06166 | 0.229205 | 0.322288 |
| FOXA2       | 20p11.21 | -0.06166 | 0.229208 | 0.322288 |
| AADA4L4     | 1p36.21  | 0.061644 | 0.22936  | 0.32247  |
| SORD        | 15q21.1  | 0.061642 | 0.22937  | 0.32247  |
| VAX2        | 2p13.3   | -0.06164 | 0.229422 | 0.322521 |
| LINC01138   | 1q21.2   | 0.061628 | 0.229481 | 0.322582 |
| NFIX        | 19p13.13 | 0.06161  | 0.229618 | 0.322752 |
| CD99L2      | Xq28     | -0.0616  | 0.229713 | 0.322862 |
| CKMT1A      | 15q15.3  | 0.061581 | 0.229835 | 0.32301  |
| PIWIL3      | 22q11.23 | 0.061579 | 0.229851 | 0.32301  |
| YIPF3       | 6p21.1   | 0.061557 | 0.230015 | 0.323216 |
| MAP4K3      | 2p22.1   | 0.061555 | 0.23003  | 0.323216 |
| ORAI2       | 7q22.1   | -0.06154 | 0.230129 | 0.32332  |
| ORC1        | 1p32.3   | -0.06154 | 0.230136 | 0.32332  |
| POM121      | 7q11.23  | -0.06152 | 0.23027  | 0.323486 |
| ARHGAP5-AS1 | 14q12    | -0.0615  | 0.230441 | 0.323704 |
| CYP2E1      | 10q26.3  | -0.06149 | 0.230523 | 0.323796 |
| LINC00598   | 13q14.11 | 0.06144  | 0.230906 | 0.324307 |
| H2BFM       | Xq22.2   | -0.06144 | 0.230919 | 0.324307 |
| NLRP14      | 11p15.4  | 0.061435 | 0.230942 | 0.324316 |
| DYNAP       | 18q21.2  | 0.061425 | 0.231015 | 0.324397 |
| TBX19       | 1q24.2   | -0.06141 | 0.231106 | 0.324487 |
| GOLGA6D     | 15q24.2  | 0.061413 | 0.231112 | 0.324487 |
| MSH6        | 2p16.3   | 0.061407 | 0.231153 | 0.324522 |

|            |          |          |          |          |
|------------|----------|----------|----------|----------|
| TANGO6     | 16q22.1  | -0.0614  | 0.231184 | 0.324535 |
| ARAF       | Xp11.3   | -0.0614  | 0.231211 | 0.324535 |
| RBM48      | 7q21.2   | -0.0614  | 0.231212 | 0.324535 |
| LINC01011  | 6p25.2   | -0.0614  | 0.231227 | 0.324535 |
| ATG9A      | 2q35     | -0.06139 | 0.231289 | 0.324599 |
| S100A5     | 1q21.3   | -0.06138 | 0.231365 | 0.324669 |
| BORCS7     | 10q24.32 | 0.061379 | 0.231371 | 0.324669 |
| NGFR       | 17q21.33 | 0.061375 | 0.231401 | 0.324688 |
| TIFA       | 4q25     | 0.061368 | 0.231453 | 0.324738 |
| CPSF7      | 11q12.2  | -0.06136 | 0.231503 | 0.324785 |
| MPC1       | 6q27     | -0.06134 | 0.231688 | 0.325022 |
| ZNF319     | 16q21    | 0.061315 | 0.231854 | 0.325198 |
| TRIM15     | 6p22.1   | -0.06132 | 0.231857 | 0.325198 |
| ZNF622     | 5p15.1   | -0.06131 | 0.231862 | 0.325198 |
| PIP4P2     | 8q21.3   | -0.0613  | 0.231979 | 0.325339 |
| NOTCH2NLA  | 1q21.1   | 0.061273 | 0.232176 | 0.325581 |
| NUP205     | 7q33     | 0.061272 | 0.232184 | 0.325581 |
| RPS10P7    | 1q32.1   | -0.06124 | 0.232408 | 0.325856 |
| XAF1       | 17p13.1  | 0.061242 | 0.232412 | 0.325856 |
| SOX11      | 2p25.2   | 0.061223 | 0.232562 | 0.326042 |
| CPPED1     | 16p13.12 | -0.06122 | 0.232612 | 0.326089 |
| UGT3A1     | 5p13.2   | -0.06121 | 0.232656 | 0.326128 |
| SKA1       | 18q21.1  | -0.06119 | 0.232824 | 0.326341 |
| PLA2G4C    | 19q13.33 | 0.061177 | 0.23291  | 0.326436 |
| THEM4      | 1q21.3   | -0.06118 | 0.232924 | 0.326436 |
| ABCC8      | 11p15.1  | 0.061157 | 0.233062 | 0.326606 |
| RAET1K     | 6q25.1   | -0.06115 | 0.233111 | 0.326653 |
| KCNC3      | 19q13.33 | 0.06114  | 0.233198 | 0.326751 |
| MTFR1      | 8q13.1   | -0.06113 | 0.233271 | 0.32683  |
| MMP8       | 11q22.2  | 0.061119 | 0.233354 | 0.326918 |
| RILP       | 17p13.3  | 0.061118 | 0.233366 | 0.326918 |
| LINC00301  | 11q12.2  | -0.06109 | 0.233554 | 0.327123 |
| AATK       | 17q25.3  | -0.06109 | 0.233563 | 0.327123 |
| INSM1      | 20p11.23 | 0.061092 | 0.233563 | 0.327123 |
| POU5F2     | 5q15     | -0.06109 | 0.233577 | 0.327123 |
| DMRT3      | 9p24.3   | -0.06107 | 0.233741 | 0.327329 |
| ADGRG7     | 3q12.2   | -0.06105 | 0.233922 | 0.327544 |
| EPHA10     | 1p34.3   | 0.061044 | 0.233927 | 0.327544 |
| EPHB3      | 3q27.1   | 0.061028 | 0.234055 | 0.3277   |
| TINAG      | 6p12.1   | -0.06102 | 0.234124 | 0.327762 |
| ZNF468     | 19q13.41 | 0.061018 | 0.234132 | 0.327762 |
| CAMKK2     | 12q24.31 | 0.060999 | 0.234276 | 0.327906 |
| C1ORF43    | 1q21.3   | -0.061   | 0.234276 | 0.327906 |
| OR14I1     | 1q44     | 0.060998 | 0.234284 | 0.327906 |
| PTPRS      | 19p13.3  | 0.060984 | 0.234395 | 0.328039 |
| CREB3L3    | 19p13.3  | -0.06094 | 0.234719 | 0.328469 |
| RAB40AL    | Xq22.1   | -0.06091 | 0.234935 | 0.328748 |
| EARS2      | 16p12.2  | -0.06089 | 0.235099 | 0.328955 |
| OMG        | 17q11.2  | 0.060879 | 0.235197 | 0.329068 |
| RASAL2-AS1 | 1q25.2   | -0.06087 | 0.235262 | 0.329137 |
| LINC01341  | 1q44     | -0.06086 | 0.235312 | 0.329184 |
| PPP3R2     | 9q31.1   | -0.06086 | 0.235336 | 0.329195 |
| GDF5       | 20q11.22 | 0.060825 | 0.235619 | 0.329567 |
| HIST3H2BB  | 1q42.13  | -0.06082 | 0.235687 | 0.32964  |
| WRB        | 21q22.2  | -0.0608  | 0.235788 | 0.329758 |
| MAPKAPK2   | 1q32.1   | 0.0608   | 0.23581  | 0.329765 |
| OR52K1     | 11p15.4  | 0.060797 | 0.235829 | 0.329769 |
| REG1A      | 2p12     | 0.060782 | 0.235949 | 0.32989  |

|           |               |          |          |          |
|-----------|---------------|----------|----------|----------|
| ZNF286B   | 17p11.2       | 0.060782 | 0.235951 | 0.32989  |
| NKIRAS1   | 3p24.2        | -0.06078 | 0.235968 | 0.32989  |
| SNX31     | 8q22.3        | -0.06078 | 0.235981 | 0.32989  |
| HOXA9     | 7p15.2        | -0.06074 | 0.2363   | 0.330303 |
| WDTC1     | 1p36.11       | -0.06074 | 0.23631  | 0.330303 |
| ACMSD     | 2q21.3        | -0.06071 | 0.236513 | 0.330564 |
| RHOXF1    | Xq24          | -0.06069 | 0.236627 | 0.330693 |
| MYCN      | 2p24.3        | 0.060693 | 0.236638 | 0.330693 |
| GBP1P1    | 1p22.2        | 0.060675 | 0.236772 | 0.330856 |
| C3ORF67   | 3p14.2        | 0.060663 | 0.236868 | 0.330968 |
| MMADHC    | 2q23.2        | 0.060659 | 0.2369   | 0.330989 |
| NEMP1     | 12q13.3       | -0.06063 | 0.237127 | 0.331272 |
| OR6C65    | 12q13.2       | -0.06063 | 0.237135 | 0.331272 |
| CEP162    | 6q14.2-q14.3  | -0.06062 | 0.2372   | 0.331339 |
| TTYH3     | 7p22.3        | 0.060616 | 0.237235 | 0.331365 |
| ZFP37     | 9q32          | 0.060601 | 0.237347 | 0.331498 |
| SPACA1    | 6q15          | -0.0606  | 0.237372 | 0.33151  |
| NKX2-2    | 20p11.22      | 0.060588 | 0.237449 | 0.331595 |
| IL11      | 19q13.42      | -0.06058 | 0.237546 | 0.331706 |
| WWC2-AS2  | 4q35.1        | 0.060572 | 0.237577 | 0.331727 |
| TEKT3     | 17p12         | 0.060557 | 0.237693 | 0.331865 |
| CCDC25    | 8p21.1        | 0.060503 | 0.238108 | 0.332421 |
| PFKFB4    | 3p21.31       | 0.060492 | 0.238196 | 0.332522 |
| LRRN1     | 3p26.2        | 0.060479 | 0.238298 | 0.33264  |
| ARSD      | Xp22.33       | 0.060464 | 0.23841  | 0.332774 |
| ZNF474    | 5q23.2        | 0.060457 | 0.23847  | 0.332834 |
| ALKBH1    | 14q24.3       | -0.06045 | 0.238533 | 0.332899 |
| ALAD      | 9q32          | 0.060422 | 0.238739 | 0.333163 |
| THSD7B    | 2q22.1        | 0.060416 | 0.238786 | 0.333205 |
| L3MBTL2   | 22q13.2       | -0.06039 | 0.239007 | 0.333491 |
| MYL10     | 7q22.1        | -0.06038 | 0.239073 | 0.333551 |
| LELP1     | 1q21.3        | 0.060377 | 0.23909  | 0.333551 |
| TM6SF2    | 19p13.11      | -0.06038 | 0.2391   | 0.333551 |
| RBM15B    | 3p21.2        | 0.060373 | 0.239125 | 0.333562 |
| LINC00710 | 10p14         | -0.06032 | 0.239571 | 0.334161 |
| RUFY3     | 4q13.3        | -0.0603  | 0.239654 | 0.334233 |
| PCSK9     | 1p32.3        | 0.060303 | 0.239667 | 0.334233 |
|           | 2-Mar 19p13.2 | -0.0603  | 0.239672 | 0.334233 |
| CTRB2     | 16q23.1       | -0.06027 | 0.239913 | 0.334535 |
| KCNJ4     | 22q13.1       | -0.06027 | 0.239923 | 0.334535 |
| IER2      | 19p13.13      | -0.06026 | 0.240022 | 0.33465  |
| ZNF343    | 20p13         | -0.06024 | 0.240162 | 0.334822 |
| UGT2B28   | 4q13.2        | 0.060221 | 0.240306 | 0.335    |
| C11ORF45  | 11q24.3       | 0.060214 | 0.24036  | 0.335052 |
| GAGE2C    | Xp11.23       | -0.0602  | 0.24049  | 0.33521  |
| DEFA4     | 8p23.1        | 0.060189 | 0.240559 | 0.335282 |
| RARS2     | 6q15          | -0.06017 | 0.240704 | 0.335461 |
| RIPPLY2   | 6q14.2        | -0.06017 | 0.240732 | 0.335478 |
| ESPNP     | 1p36.13       | -0.06016 | 0.240793 | 0.33552  |
| DEFB132   | 20p13         | -0.06016 | 0.240796 | 0.33552  |
| CDAN1     | 15q15.2       | 0.060135 | 0.240981 | 0.335753 |
| PRAMEF12  | 1p36.21       | -0.06012 | 0.241106 | 0.335905 |
| SPON2     | 4p16.3        | 0.060106 | 0.24121  | 0.336026 |
| SPATA31A5 | 9q12          | -0.0601  | 0.241248 | 0.336035 |
| CCDC63    | 12q24.11      | -0.0601  | 0.24125  | 0.336035 |
| SLC38A10  | 17q25.3       | -0.0601  | 0.241283 | 0.336057 |
| ZNF442    | 19p13.2       | 0.060077 | 0.241435 | 0.336224 |
| LINC00029 | 20q13.33      | -0.06008 | 0.241436 | 0.336224 |

|            |               |          |          |          |
|------------|---------------|----------|----------|----------|
| HSP90AB4P  | 15q21.3       | -0.06006 | 0.241534 | 0.336329 |
| ZDHHHC18   | 1p36.11       | -0.06006 | 0.241545 | 0.336329 |
| CIAO2A     | 15q22.31      | 0.060026 | 0.24184  | 0.336717 |
| ZNF585A    | 19q13.12      | 0.059982 | 0.242184 | 0.337161 |
| BHMT       | 5q14.1        | -0.05998 | 0.242193 | 0.337161 |
| ZNF607     | 19q13.12      | -0.05997 | 0.242289 | 0.337271 |
| ZNF714     | 19p12         | 0.059966 | 0.242308 | 0.337274 |
| C12ORF66   | 12q14.2       | -0.05996 | 0.242369 | 0.337335 |
| HACD1      | 10p12.33      | -0.05994 | 0.24248  | 0.337467 |
| PATE2      | 11q24.2       | 0.059942 | 0.242499 | 0.33747  |
| SERPINB9   | 6p25.2        | 0.059936 | 0.242547 | 0.337512 |
| HOXC5      | 12q13.13      | 0.059914 | 0.24272  | 0.33773  |
| LENG9      | 19q13.42      | -0.05989 | 0.242943 | 0.338018 |
| OR52N1     | 11p15.4       | -0.05986 | 0.243163 | 0.338299 |
| LCN1       | 9q34.3        | -0.05985 | 0.243204 | 0.338333 |
| TSLP       | 5q22.1        | 0.059844 | 0.243268 | 0.338399 |
| FOXD4L6    | 9p11.2        | 0.059839 | 0.243306 | 0.338429 |
| SFTPD      | 10q22.3       | 0.059832 | 0.243363 | 0.338484 |
| DNAJB6     | 7q36.3        | -0.05982 | 0.243471 | 0.338611 |
| CCDC198    | 14q22.3       | 0.059806 | 0.243569 | 0.338723 |
| KIF4B      | 5q33.2        | 0.059802 | 0.243602 | 0.338746 |
| SNORA46    | 16q21         | 0.059788 | 0.243715 | 0.33888  |
| IFT80      | 3q25.33       | 0.059782 | 0.243761 | 0.338919 |
| RUSC1      | 1q22          | 0.059779 | 0.243786 | 0.338931 |
| CCDC81     | 11q14.2       | -0.05974 | 0.244112 | 0.33936  |
| AXIN2      | 17q24.1       | -0.0597  | 0.244394 | 0.339717 |
| CATSPER2P1 | 15q15.3       | -0.0597  | 0.244402 | 0.339717 |
| C17ORF102  | 17q12         | 0.059684 | 0.24453  | 0.339872 |
| ENHO       | 9p13.3        | -0.05963 | 0.244982 | 0.340476 |
| TSC2       | 16p13.3       | 0.059624 | 0.245006 | 0.340485 |
| GREB1L     | 18q11.1-q11.2 | 0.059619 | 0.245048 | 0.340507 |
| VPS37C     | 11q12.2       | -0.05962 | 0.245056 | 0.340507 |
| ZNF37BP    | 10q11.21      | -0.05958 | 0.245332 | 0.340868 |
| AP1AR      | 4q25          | 0.05957  | 0.245436 | 0.340989 |
| OTULINL    | 5p15.2        | -0.05956 | 0.245537 | 0.341105 |
| LGALS12    | 11q12.3       | 0.059549 | 0.245602 | 0.341171 |
| OAT        | 10q26.13      | -0.05952 | 0.245816 | 0.341445 |
| FAM219A    | 9p13.3        | -0.05951 | 0.24592  | 0.341567 |
| LAP3       | 4p15.32       | 0.059501 | 0.245985 | 0.341633 |
| CCL8       | 17q12         | 0.059465 | 0.246273 | 0.342009 |
| NAB2       | 12q13.3       | -0.05946 | 0.246318 | 0.342026 |
| EFCAB1     | 8q11.21       | 0.059459 | 0.24632  | 0.342026 |
| ISCA1P1    | 5q12.1        | -0.05945 | 0.246422 | 0.342145 |
| PHOSPHO1   | 17q21.32      | 0.059437 | 0.246498 | 0.342227 |
| VIL1       | 2q35          | 0.059422 | 0.246618 | 0.342369 |
| OR2L13     | 1q44          | 0.059409 | 0.246718 | 0.342476 |
| CA5A       | 16q24.2       | -0.05941 | 0.246729 | 0.342476 |
| USP5       | 12p13.31      | -0.0594  | 0.24677  | 0.3425   |
| PHETA1     | 12q24.12      | -0.0594  | 0.246781 | 0.3425   |
| ARL6       | 3q11.2        | 0.05939  | 0.246867 | 0.342596 |
| LMF2       | 22q13.33      | -0.05938 | 0.246969 | 0.342714 |
| NDST4      | 4q26          | 0.059369 | 0.247038 | 0.342764 |
| TRIM51     | 11q12.1       | 0.059369 | 0.247039 | 0.342764 |
| ERGIC2     | 12p11.22      | 0.059341 | 0.247265 | 0.343053 |
| FSIP1      | 15q14         | 0.059325 | 0.247388 | 0.3432   |
| RUNDC3B    | 7q21.12       | 0.059308 | 0.247524 | 0.343365 |
| PDIK1L     | 1p36.11       | 0.05928  | 0.247746 | 0.343631 |
| OR10J3     | 1q23.2        | 0.05928  | 0.24775  | 0.343631 |

|           |          |          |          |          |
|-----------|----------|----------|----------|----------|
| JUNB      | 19p13.13 | 0.059272 | 0.247808 | 0.343688 |
| STRA6     | 15q24.1  | 0.059269 | 0.247834 | 0.3437   |
| C8ORF74   | 8p23.1   | 0.05925  | 0.247985 | 0.343886 |
| LCE2C     | 1q21.3   | 0.059247 | 0.248009 | 0.343895 |
| ARL9      | 4q12     | 0.05923  | 0.248148 | 0.344064 |
| MPDU1     | 17p13.1  | 0.059195 | 0.248424 | 0.344423 |
| PPL       | 16p13.3  | 0.059191 | 0.248457 | 0.344445 |
| KIF3C     | 2p23.3   | 0.059172 | 0.248609 | 0.344631 |
| LINC00470 | 18p11.32 | 0.059163 | 0.248685 | 0.344712 |
| MMP23A    | 1p36.33  | 0.059128 | 0.248961 | 0.345072 |
| GPBAR1    | 2q35     | 0.05912  | 0.249028 | 0.345141 |
| C1ORF127  | 1p36.22  | -0.05907 | 0.249417 | 0.345656 |
| HPS6      | 10q24.32 | -0.05905 | 0.249612 | 0.345889 |
| IFNL3     | 19q13.2  | 0.059046 | 0.249619 | 0.345889 |
| SPATS2    | 12q13.12 | 0.059042 | 0.249652 | 0.34591  |
| CEACAM18  | 19q13.41 | -0.05904 | 0.249699 | 0.345951 |
| TMEM212   | 3q26.31  | 0.059027 | 0.249773 | 0.34603  |
| CBLL1     | 7q22.3   | 0.059004 | 0.24996  | 0.346265 |
| SUGT1P1   | 9p13.3   | 0.059    | 0.249992 | 0.346266 |
| OR6N1     | 1q23.1   | 0.059    | 0.249996 | 0.346266 |
| SERBP1    | 1p31.3   | 0.058992 | 0.250055 | 0.346325 |
| CLDN1     | 3q28     | -0.05897 | 0.250234 | 0.346548 |
| GML       | 8q24.3   | -0.05897 | 0.250271 | 0.346575 |
| HSPA6     | 1q23.3   | 0.058958 | 0.250334 | 0.346619 |
| ZMYM3     | Xq13.1   | 0.058956 | 0.250343 | 0.346619 |
| MYRF-AS1  | 11q12.2  | 0.058955 | 0.250354 | 0.346619 |
| KRT2      | 12q13.13 | 0.058949 | 0.250401 | 0.34666  |
| PTCHD3    | 10p12.1  | 0.05892  | 0.250632 | 0.346956 |
| TCEA2     | 20q13.33 | -0.05889 | 0.250844 | 0.347225 |
| GAGE12J   | Xp11.23  | -0.05887 | 0.251064 | 0.347506 |
| KIR3DL3   | 19q13.42 | 0.05886  | 0.251117 | 0.347555 |
| FXD5      | 19q13.12 | -0.05885 | 0.251212 | 0.347662 |
| SERTM1    | 13q13.3  | 0.058846 | 0.251236 | 0.347672 |
| GTF3C2    | 2p23.3   | 0.058836 | 0.251311 | 0.347751 |
| ICAM1     | 19p13.2  | 0.058833 | 0.251335 | 0.347761 |
| NR1H2     | 19q13.33 | 0.05883  | 0.251363 | 0.347775 |
| PPP1R3A   | 7q31.1   | 0.058825 | 0.251399 | 0.347802 |
| THAP1     | 8p11.21  | 0.058821 | 0.251438 | 0.347831 |
| ACTR1A    | 10q24.32 | -0.05881 | 0.251499 | 0.347871 |
| TAX1BP3   | 17p13.2  | 0.058813 | 0.251502 | 0.347871 |
| FCRLB     | 1q23.3   | 0.058809 | 0.251531 | 0.347887 |
| TGM3      | 20p13    | 0.058794 | 0.251657 | 0.348037 |
| ZNF461    | 19q13.12 | -0.05877 | 0.251813 | 0.348219 |
| CCAR2     | 8p21.3   | 0.058773 | 0.251824 | 0.348219 |
| KLB       | 4p14     | 0.058771 | 0.25184  | 0.348219 |
| CDSN      | 6p21.33  | -0.05875 | 0.251994 | 0.348408 |
| AQP4      | 18q11.2  | 0.058749 | 0.252013 | 0.348409 |
| HPS4      | 22q12.1  | -0.05874 | 0.252066 | 0.348459 |
| ME1       | 6q14.2   | 0.058738 | 0.252104 | 0.348461 |
| ATP6V1C1  | 8q22.3   | -0.05874 | 0.252111 | 0.348461 |
| TMEM207   | 3q28     | 0.058736 | 0.25212  | 0.348461 |
| MAGED1    | Xp11.22  | 0.058725 | 0.25221  | 0.348544 |
| SLC37A3   | 7q34     | 0.058721 | 0.25224  | 0.348544 |
| THEG      | 19p13.3  | 0.058719 | 0.252262 | 0.348544 |
| HJV       | 1q21.1   | -0.05872 | 0.252266 | 0.348544 |
| ZNF784    | 19q13.42 | -0.05872 | 0.252267 | 0.348544 |
| THRB      | 3p24.2   | 0.058699 | 0.252418 | 0.348728 |
| SSBP3     | 1p32.3   | 0.058688 | 0.252508 | 0.34883  |

|            |              |          |          |          |
|------------|--------------|----------|----------|----------|
| PRSS21     | 16p13.3      | 0.058685 | 0.252532 | 0.348838 |
| EIF4E      | 4q23         | -0.05868 | 0.252569 | 0.348866 |
| MAG        | 19q13.12     | 0.05867  | 0.252659 | 0.348966 |
| GGA2       | 16p12.2      | -0.05867 | 0.252693 | 0.348989 |
| HOTAIR     | 12q13.13     | -0.05866 | 0.252719 | 0.349001 |
| STEAP3     | 2q14.2       | -0.05866 | 0.252742 | 0.349008 |
| PPCDC      | 15q24.2      | -0.05866 | 0.252763 | 0.349013 |
| RTL8C      | Xq26.3       | -0.05864 | 0.25286  | 0.349108 |
| PHF6       | Xq26.2       | 0.058642 | 0.25288  | 0.349108 |
| CYP2B6     | 19q13.2      | -0.05864 | 0.252884 | 0.349108 |
| VENTX      | 10q26.3      | -0.05862 | 0.253039 | 0.349298 |
| SLC25A3P1  | 1p32.3       | -0.05861 | 0.253124 | 0.349391 |
| MTNR1B     | 11q14.3      | 0.058601 | 0.253211 | 0.349464 |
| OR6F1      | 1q44         | -0.0586  | 0.253212 | 0.349464 |
| TAS2R9     | 12p13.2      | -0.0586  | 0.253236 | 0.349474 |
| RFX6       | 6q22.1       | 0.05859  | 0.253307 | 0.349547 |
| TMEM236    | 10p12.33     | 0.058573 | 0.253444 | 0.349712 |
| PKD1L3     | 16q22.2      | 0.058569 | 0.253477 | 0.349714 |
| CADPS      | 3p14.2       | 0.058568 | 0.25348  | 0.349714 |
| FAM120C    | Xp11.22      | -0.05856 | 0.253524 | 0.34975  |
| CHI3L1     | 1q32.1       | 0.058561 | 0.253543 | 0.349753 |
| SLC35A4    | 5q31.3       | 0.058557 | 0.253571 | 0.349767 |
| MSRA       | 8p23.1       | 0.058555 | 0.253592 | 0.349772 |
| PERP       | 6q23.3       | -0.05855 | 0.253624 | 0.349782 |
| BSDC1      | 1p35.1       | -0.05855 | 0.253641 | 0.349782 |
| GPR153     | 1p36.31      | -0.05855 | 0.253652 | 0.349782 |
| STN1       | 10q24.33     | 0.058544 | 0.253676 | 0.349792 |
| TFR2       | 7q22.1       | 0.058536 | 0.253739 | 0.349854 |
| SP110      | 2q37.1       | 0.058526 | 0.253823 | 0.349926 |
| ADAMTS4    | 1q23.3       | 0.058525 | 0.253834 | 0.349926 |
| TDGF1P3    | Xq23         | -0.05852 | 0.253844 | 0.349926 |
| DOCK6      | 19p13.2      | -0.05851 | 0.253933 | 0.350026 |
| PWARSN     | 15q11.2      | 0.058491 | 0.254106 | 0.35024  |
| PTPRT      | 20q12-q13.11 | 0.058463 | 0.254334 | 0.350529 |
| ADGB       | 6q24.3       | -0.05845 | 0.254458 | 0.350676 |
| HNRNPA1L2  | 13q14.3      | -0.05844 | 0.254485 | 0.35069  |
| PCDHA8     | 5q31.3       | 0.058415 | 0.254725 | 0.350996 |
| ZNF793     | 19q13.12     | 0.058402 | 0.254832 | 0.35112  |
| GHRHR      | 7p14.3       | -0.05839 | 0.254896 | 0.351183 |
| OGDHL      | 10q11.23     | -0.05839 | 0.254919 | 0.351191 |
| SLC5A2     | 16p11.2      | -0.05838 | 0.255003 | 0.351266 |
| ZNF114     | 19q13.33     | -0.05838 | 0.255026 | 0.351266 |
| BABAM2-AS1 | 2p23.2       | -0.05838 | 0.255026 | 0.351266 |
| MAK16      | 8p12         | -0.05837 | 0.255073 | 0.351306 |
| CCNT2      | 2q21.3       | 0.058356 | 0.255206 | 0.351466 |
| TFRC       | 3q29         | 0.058348 | 0.255275 | 0.351536 |
| SMIM32     | 5q31.1       | 0.058334 | 0.255388 | 0.351668 |
| WBP11P1    | 18q12.1      | 0.05833  | 0.25542  | 0.351688 |
| FAM229B    | 6q21         | -0.05832 | 0.255533 | 0.351819 |
| GZMM       | 19p13.3      | 0.058311 | 0.255577 | 0.351856 |
| RGCC       | 13q14.11     | -0.05831 | 0.255603 | 0.351866 |
| OR5B17     | 11q12.1      | 0.058306 | 0.25562  | 0.351866 |
| CREG1      | 1q24.2       | 0.0583   | 0.255666 | 0.351906 |
| FIGLA      | 2p13.3       | 0.058295 | 0.255706 | 0.351936 |
| S100A4     | 1q21.3       | -0.05829 | 0.25577  | 0.352    |
| SCARNA17   | 18q21.1      | -0.05828 | 0.255792 | 0.352006 |
| MTMR9LP    | 1p35.2       | -0.05827 | 0.255923 | 0.352163 |
| SLC8A2     | 19q13.32     | -0.05827 | 0.255946 | 0.352169 |

|           |          |          |          |          |
|-----------|----------|----------|----------|----------|
| SPACA4    | 19q13.33 | 0.05824  | 0.256152 | 0.352429 |
| BTG3      | 21q21.1  | -0.05823 | 0.256205 | 0.352477 |
| TCTN1     | 12q24.11 | -0.05823 | 0.256254 | 0.352521 |
| CDHR5     | 11p15.5  | 0.058217 | 0.256342 | 0.352618 |
| MGRN1     | 16p13.3  | 0.05821  | 0.2564   | 0.352674 |
| SAMD11    | 1p36.33  | 0.058205 | 0.256443 | 0.352708 |
| IL37      | 2q14.1   | 0.058187 | 0.256588 | 0.352884 |
| RBM3      | Xp11.23  | -0.05815 | 0.256929 | 0.353328 |
| GADD45B   | 19p13.3  | -0.05813 | 0.257039 | 0.353455 |
| BCLAF3    | Xp22.12  | 0.058128 | 0.257074 | 0.353455 |
| OR14A16   | 1q44     | 0.058128 | 0.257074 | 0.353455 |
| ALOX12P2  | 17p13.1  | 0.058124 | 0.25711  | 0.353479 |
| FOXS1     | 20q11.21 | -0.05811 | 0.257243 | 0.353639 |
| SNORA36A  | Xq28     | -0.0581  | 0.257265 | 0.353644 |
| CARD9     | 9q34.3   | 0.058095 | 0.257341 | 0.353724 |
| ELANE     | 19p13.3  | 0.058091 | 0.257372 | 0.353744 |
| LINC00926 | 15q21.3  | -0.05807 | 0.257512 | 0.353876 |
| ATP4A     | 19q13.12 | -0.05807 | 0.257512 | 0.353876 |
| TNK1      | 17p13.1  | 0.058073 | 0.257522 | 0.353876 |
| ARL6IP1   | 16p12.3  | -0.05807 | 0.257556 | 0.353899 |
| GLIPR2    | 9p13.3   | 0.058057 | 0.257652 | 0.354006 |
| TREML3P   | 6p21.1   | 0.058051 | 0.257707 | 0.354057 |
| GIP       | 17q21.32 | -0.05801 | 0.258031 | 0.354479 |
| FGF23     | 12p13.32 | 0.057996 | 0.25816  | 0.354632 |
| OR2A14    | 7q35     | -0.05799 | 0.258237 | 0.354713 |
| UBAP1     | 9p13.3   | 0.057958 | 0.258471 | 0.35501  |
| RUNX1-IT1 | 21q22.12 | 0.057933 | 0.258677 | 0.355269 |
| SEC63     | 6q21     | 0.057925 | 0.258744 | 0.355333 |
| MYEF2     | 15q21.1  | 0.057923 | 0.25876  | 0.355333 |
| FOXI1     | 5q35.1   | 0.057917 | 0.258806 | 0.355373 |
| P2RX5     | 17p13.2  | -0.05791 | 0.258875 | 0.355443 |
| PPP1R2C   | Xp11.3   | 0.057884 | 0.259077 | 0.355696 |
| FBXO5     | 6q25.2   | -0.05788 | 0.259115 | 0.355723 |
| SPRYD3    | 12q13.13 | 0.057874 | 0.259159 | 0.355759 |
| CYP4F35P  | 18p11.21 | -0.05786 | 0.259287 | 0.355911 |
| COCH      | 14q12    | -0.05786 | 0.259308 | 0.355915 |
| LINC01184 | 5q23.3   | -0.05785 | 0.259342 | 0.355937 |
| DRD3      | 3q13.31  | 0.057837 | 0.259465 | 0.356082 |
| DSCR8     | 21q22.13 | -0.05783 | 0.259519 | 0.356132 |
| LOC441601 | 11p11.12 | -0.05783 | 0.259564 | 0.356169 |
| DPPA3     | 12p13.31 | 0.057808 | 0.259703 | 0.356336 |
| SSX8P     | Xp11.22  | -0.0578  | 0.259771 | 0.356405 |
| FLCN      | 17p11.2  | 0.057795 | 0.259816 | 0.356442 |
| HOXC9     | 12q13.13 | 0.057773 | 0.259991 | 0.356657 |
| SNTG2     | 2p25.3   | 0.057767 | 0.260042 | 0.356683 |
| ARMC9     | 2q37.1   | 0.057767 | 0.260046 | 0.356683 |
| SCN2A     | 2q24.3   | 0.05776  | 0.260104 | 0.35674  |
| SSR4P1    | 21q22.3  | -0.05774 | 0.260275 | 0.356949 |
| BRMS1L    | 14q13.2  | 0.057733 | 0.260323 | 0.356991 |
| TULP4     | 6q25.3   | 0.057689 | 0.260692 | 0.357472 |
| SYT1      | 12q21.2  | -0.05768 | 0.260733 | 0.357504 |
| SERINC3   | 20q13.12 | 0.057679 | 0.260774 | 0.357535 |
| OPRPN     | 4q13.3   | -0.05767 | 0.260875 | 0.357649 |
| YAF2      | 12q12    | -0.05766 | 0.260933 | 0.357694 |
| PALM      | 19p13.3  | 0.057658 | 0.260943 | 0.357694 |
| RELA      | 11q13.1  | -0.05764 | 0.261118 | 0.357909 |
| SPIN2A    | Xp11.21  | 0.057622 | 0.261244 | 0.358057 |
| CASK      | Xp11.4   | -0.05759 | 0.26155  | 0.358452 |

|            |          |          |          |          |
|------------|----------|----------|----------|----------|
| MYO1A      | 12q13.3  | 0.057581 | 0.261584 | 0.358474 |
| C22ORF34   | 22q13.33 | 0.057579 | 0.261602 | 0.358474 |
| SAMD1      | 19p13.12 | -0.05757 | 0.261663 | 0.358533 |
| HAMP       | 19q13.12 | 0.057569 | 0.261686 | 0.358539 |
| TUBB2B     | 6p25.2   | 0.057567 | 0.261703 | 0.358539 |
| GRK4       | 4p16.3   | -0.05756 | 0.261796 | 0.358642 |
| ASTN2      | 9q33.1   | -0.05753 | 0.262007 | 0.358907 |
| RWDD2B     | 21q21.3  | -0.05752 | 0.262111 | 0.359025 |
| KRT5       | 12q13.13 | 0.057515 | 0.262134 | 0.359031 |
| C9ORF106   | 9q34.11  | 0.057497 | 0.26228  | 0.359207 |
| ELP1       | 9q31.3   | 0.057493 | 0.262315 | 0.359211 |
| FDPSP2     | 7q11.23  | -0.05749 | 0.262325 | 0.359211 |
| MPHOSPH8   | 13q12.11 | 0.05749  | 0.262337 | 0.359211 |
| ZIM3       | 19q13.43 | -0.05748 | 0.262447 | 0.359337 |
| CXORF56    | Xq24     | -0.05747 | 0.2625   | 0.359375 |
| TMEM217    | 6p21.2   | 0.05747  | 0.26251  | 0.359375 |
| PLA2G12A   | 4q25     | -0.05746 | 0.262616 | 0.359495 |
| ARMC4      | 10p12.1  | 0.057452 | 0.262657 | 0.359526 |
| NHLRC4     | 16p13.3  | 0.057436 | 0.262792 | 0.359686 |
| SRF        | 6p21.1   | 0.057422 | 0.262904 | 0.359816 |
| PIK3C2G    | 12p12.3  | 0.057406 | 0.263039 | 0.359967 |
| SPPL2C     | 17q21.31 | 0.057405 | 0.263051 | 0.359967 |
| ALOX12     | 17p13.1  | 0.057387 | 0.263199 | 0.360145 |
| PRSS1      | 7q34     | -0.05738 | 0.263247 | 0.360186 |
| MGC16025   | 2q37.3   | -0.05737 | 0.263325 | 0.360268 |
| SNORA58    | 3q22.1   | 0.057367 | 0.263368 | 0.360303 |
| NEUROD1    | 2q31.3   | -0.05736 | 0.263452 | 0.360393 |
| GSX2       | 4q12     | 0.057344 | 0.263559 | 0.360514 |
| GHSR       | 3q26.31  | 0.05734  | 0.263589 | 0.360531 |
| LINC00895  | 22q11.21 | -0.05733 | 0.263642 | 0.360579 |
| EN1        | 2q14.2   | 0.057323 | 0.263731 | 0.360676 |
| RAD18      | 3p25.3   | -0.05732 | 0.263778 | 0.360716 |
| STAC3      | 12q13.3  | 0.057307 | 0.263866 | 0.360812 |
| OSGIN2     | 8q21.3   | -0.0573  | 0.263888 | 0.360817 |
| NUDT21     | 16q13    | 0.057299 | 0.263929 | 0.360846 |
| TRIM53AP   | 11q14.3  | 0.057297 | 0.263945 | 0.360846 |
| MAGT1      | Xq21.1   | 0.057295 | 0.263967 | 0.360851 |
| TARS       | 5p13.3   | -0.05728 | 0.264095 | 0.360991 |
| ANGPTL8    | 19p13.2  | -0.05728 | 0.264118 | 0.360991 |
| COX6B2     | 19q13.42 | -0.05728 | 0.264123 | 0.360991 |
| PCDHA5     | 5q31.3   | 0.057261 | 0.264253 | 0.361143 |
| SMCO3      | 12p12.3  | -0.05724 | 0.26444  | 0.361375 |
| ZNF204P    | 6p22.1   | 0.05722  | 0.264589 | 0.361554 |
| LBR        | 1q42.12  | 0.057212 | 0.264658 | 0.361623 |
| ST13       | 22q13.2  | -0.05719 | 0.264847 | 0.361856 |
| YPEL3      | 16p11.2  | -0.05717 | 0.264971 | 0.361984 |
| SLAMF9     | 1q23.2   | 0.057174 | 0.264977 | 0.361984 |
| H3F3AP5    | Xp11.22  | 0.057169 | 0.265017 | 0.362014 |
| RRAGA      | 9p22.1   | -0.05715 | 0.265184 | 0.362193 |
| HEATR3     | 16q12.1  | -0.05715 | 0.265191 | 0.362193 |
| TMED6      | 16q22.1  | -0.05715 | 0.265202 | 0.362193 |
| IFI44L     | 1p31.1   | 0.057144 | 0.265231 | 0.362197 |
| GALR2      | 17q25.1  | -0.05714 | 0.265241 | 0.362197 |
| SNORD97    | 11p15.4  | -0.05712 | 0.265398 | 0.362387 |
| TPGS1      | 19p13.3  | -0.05711 | 0.265509 | 0.362501 |
| STK26      | Xq26.2   | -0.05711 | 0.265518 | 0.362501 |
| PDCD1      | 2q37.3   | 0.057097 | 0.265621 | 0.362617 |
| MCM3AP-AS1 | 21q22.3  | 0.057093 | 0.265653 | 0.362636 |



|           |          |          |          |          |
|-----------|----------|----------|----------|----------|
| SF3B3     | 16q22.1  | -0.05707 | 0.265808 | 0.362796 |
| GALP      | 19q13.43 | -0.05707 | 0.265817 | 0.362796 |
| ILF3      | 19p13.2  | -0.05707 | 0.265825 | 0.362796 |
| KLHL42    | 12p11.22 | 0.05707  | 0.265846 | 0.362801 |
| PTH1R     | 3p21.31  | 0.057063 | 0.265911 | 0.362865 |
| MSTN      | 2q32.2   | -0.05705 | 0.266042 | 0.363018 |
| ALDH3A1   | 17p11.2  | 0.057041 | 0.26609  | 0.36306  |
| SLC38A11  | 2q24.3   | -0.05703 | 0.266171 | 0.363143 |
| MCCD1     | 6p21.33  | -0.05703 | 0.266188 | 0.363143 |
| NBPF6     | 1p13.3   | 0.057025 | 0.266228 | 0.363173 |
| FOXK1     | 7p22.1   | -0.05701 | 0.266313 | 0.363264 |
| ZHX3      | 20q12    | -0.05701 | 0.266343 | 0.363281 |
| C8G       | 9q34.3   | -0.057   | 0.266398 | 0.363332 |
| PATE1     | 11q24.2  | 0.056997 | 0.266465 | 0.363398 |
| MUC6      | 11p15.5  | 0.056988 | 0.266541 | 0.363476 |
| NCOA6     | 20q11.22 | -0.05698 | 0.266568 | 0.363488 |
| KAT5      | 11q13.1  | -0.05697 | 0.266694 | 0.363611 |
| C15ORF61  | 15q23    | -0.05697 | 0.266709 | 0.363611 |
| HIBCH     | 2q32.2   | -0.05697 | 0.266712 | 0.363611 |
| ZNF589    | 3p21.31  | -0.05695 | 0.266854 | 0.363779 |
| C11ORF16  | 11p15.4  | -0.05695 | 0.266892 | 0.363799 |
| SERPINA12 | 14q32.13 | -0.05694 | 0.266905 | 0.363799 |
| SLC25A48  | 5q31.1   | 0.056928 | 0.26704  | 0.363956 |
| CBLN4     | 20q13.2  | 0.056926 | 0.267056 | 0.363956 |
| NCAPD2    | 12p13.31 | 0.056924 | 0.267075 | 0.363957 |
| C10ORF67  | 10p12.2  | -0.0569  | 0.267253 | 0.364175 |
| FBRS      | 16p11.2  | -0.0569  | 0.267314 | 0.364233 |
| ANKRD66   | 6p12.3   | 0.056893 | 0.267337 | 0.36424  |
| MRPL46    | 15q25.3  | 0.056883 | 0.267417 | 0.364324 |
| RFPL3     | 22q12.3  | 0.056879 | 0.267457 | 0.364353 |
| BEND2     | Xp22.13  | 0.056866 | 0.26756  | 0.36447  |
| DLK1      | 14q32.2  | -0.05686 | 0.267619 | 0.364524 |
| EFHC2     | Xp11.3   | 0.056849 | 0.267706 | 0.364605 |
| NEUROG1   | 5q31.1   | -0.05685 | 0.267724 | 0.364605 |
| CCKAR     | 4p15.2   | 0.056846 | 0.267733 | 0.364605 |
| MBNL2     | 13q32.1  | 0.056833 | 0.267846 | 0.364734 |
| FRG2B     | 10q26.3  | -0.05683 | 0.267898 | 0.364781 |
| NRBP1     | 2p23.3   | 0.056805 | 0.268074 | 0.364996 |
| SPEM1     | 17p13.1  | -0.0568  | 0.26813  | 0.365047 |
| YWHAQ     | 2p25.1   | -0.05679 | 0.268165 | 0.36507  |
| SYNPR     | 3p14.2   | 0.056769 | 0.268383 | 0.365342 |
| MYLIP     | 6p22.3   | 0.056735 | 0.268667 | 0.365703 |
| FLT3LG    | 19q13.33 | 0.056729 | 0.268716 | 0.365745 |
| LIMS2     | 2q14.3   | 0.056718 | 0.268809 | 0.365847 |
| CDK11A    | 1p36.33  | -0.0567  | 0.268933 | 0.36599  |
| EPX       | 17q22    | 0.056701 | 0.268954 | 0.365995 |
| CEP57     | 11q21    | -0.0567  | 0.268985 | 0.366013 |
| PLIN2     | 9p22.1   | -0.05668 | 0.269122 | 0.366173 |
| FSTL5     | 4q32.2   | 0.056651 | 0.269381 | 0.366501 |
| WBP2      | 17q25.1  | -0.05664 | 0.269432 | 0.366545 |
| SYPL1     | 7q22.3   | 0.056639 | 0.269481 | 0.366587 |
| ELOVL3    | 10q24.32 | -0.05663 | 0.269574 | 0.366689 |
| TMEM98    | 17q11.2  | -0.05661 | 0.269711 | 0.36685  |
| LOR       | 1q21.3   | 0.056609 | 0.269736 | 0.366859 |
| SULT1E1   | 4q13.3   | -0.0566  | 0.269848 | 0.366986 |
| S100A11   | 1q21.3   | -0.05658 | 0.269943 | 0.367047 |
| SPATA9    | 5q15     | -0.05658 | 0.26998  | 0.367047 |
| IQCF3     | 3p21.2   | -0.05658 | 0.269992 | 0.367047 |

|            |                |          |          |          |
|------------|----------------|----------|----------|----------|
| TUBA1A     | 12q13.12       | 0.056579 | 0.269994 | 0.367047 |
| ARHGEF33   | 2p22.1         | -0.05658 | 0.270006 | 0.367047 |
| IFITM2     | 11p15.5        | -0.05658 | 0.27001  | 0.367047 |
| GSG1L      | 16p12.1        | 0.056575 | 0.27002  | 0.367047 |
| EGF        | 4q25           | 0.056562 | 0.270136 | 0.367159 |
| CHERP      | 19p13.11       | -0.05656 | 0.27014  | 0.367159 |
| USP6NL     | 10p14          | 0.056553 | 0.270207 | 0.367226 |
| CLDN20     | 6q25.3         | -0.05654 | 0.270285 | 0.367306 |
| TCEAL4     | Xq22.2         | -0.05654 | 0.270335 | 0.36735  |
| C16ORF96   | 16p13.3        | 0.056536 | 0.270358 | 0.367356 |
| WNT5B      | 12p13.33       | 0.056524 | 0.270456 | 0.367439 |
| DNAAF1     | 16q24.1        | -0.05652 | 0.270456 | 0.367439 |
| PCDHA1     | 5q31.3         | 0.056513 | 0.270552 | 0.367545 |
| YBX3       | 12p13.2        | -0.05649 | 0.270774 | 0.367804 |
| ATP13A2    | 1p36.13        | -0.05649 | 0.270779 | 0.367804 |
| PI4K2A     | 10q24.2        | 0.056475 | 0.270869 | 0.367901 |
| TBX5       | 12q24.21       | 0.056456 | 0.271032 | 0.368097 |
| SGK3       | 8q13.1         | 0.056452 | 0.271068 | 0.368122 |
| RPL29P2    | 17p13.1        | -0.05644 | 0.271142 | 0.368196 |
| CDC42      | 1p36.12        | 0.05644  | 0.271173 | 0.368213 |
| ZNF623     | 8q24.3         | 0.05643  | 0.271253 | 0.368298 |
| OSCAR      | 19q13.42       | 0.056423 | 0.271316 | 0.368332 |
| DOLPP1     | 9q34.11        | -0.05642 | 0.271316 | 0.368332 |
| WFIKKN1    | 16p13.3        | 0.056407 | 0.271448 | 0.368486 |
| MSC        | 8q13.3         | 0.056396 | 0.271546 | 0.368596 |
| STRIP2     | 7q32.1         | -0.05639 | 0.271601 | 0.368645 |
| PCCB       | 3q22.3         | 0.056376 | 0.271719 | 0.368773 |
| LYZL1      | 10p12.1-p11.23 | -0.05637 | 0.271732 | 0.368773 |
| FAM133CP   | 10q21.1        | 0.056365 | 0.271805 | 0.368847 |
| LLCFC1     | 7q34           | 0.056353 | 0.271907 | 0.368896 |
| SNORA27    | 13q12.2        | -0.05635 | 0.271927 | 0.368963 |
| PROS1      | 3q11.1         | 0.056346 | 0.271974 | 0.369001 |
| MOV10L1    | 22q13.33       | 0.05634  | 0.272021 | 0.36904  |
| TRIM68     | 11p15.4        | 0.056335 | 0.272065 | 0.369075 |
| BCAN       | 1q23.1         | -0.05631 | 0.272236 | 0.369282 |
| C1ORF158   | 1p36.21        | -0.05631 | 0.272275 | 0.369309 |
| FAM47C     | Xp21.1         | -0.0563  | 0.272378 | 0.369425 |
| EXOC3L1    | 16q22.1        | -0.05629 | 0.272434 | 0.369475 |
| CLTCL1     | 22q11.21       | -0.05628 | 0.272528 | 0.369578 |
| PCDHGB1    | 5q31.3         | 0.056256 | 0.272734 | 0.369832 |
| HDAC7      | 12q13.11       | 0.056251 | 0.272784 | 0.369875 |
| PSKH2      | 8q21.3         | -0.05624 | 0.272908 | 0.370001 |
| ZNF846     | 19p13.2        | 0.056235 | 0.272914 | 0.370001 |
| FOXB1      | 15q22.2        | -0.05623 | 0.272944 | 0.370008 |
| ESRP2      | 16q22.1        | -0.05623 | 0.272956 | 0.370008 |
| GLT6D1     | 9q34.3         | -0.05619 | 0.273282 | 0.370404 |
| SLED1      | 4q35.1         | -0.05619 | 0.273286 | 0.370404 |
| ARL8A      | 1q32.1         | -0.05619 | 0.273319 | 0.370424 |
| GPR179     | 17q12          | -0.05618 | 0.273356 | 0.37045  |
| KRTAP7-1   | 21q22.11       | 0.056173 | 0.273451 | 0.370553 |
| MTF2       | 1p22.1         | -0.05616 | 0.273597 | 0.370707 |
| ARRDC3-AS1 | 5q14.3         | -0.05615 | 0.273601 | 0.370707 |
| APOC2      | 19q13.32       | -0.05615 | 0.273647 | 0.370743 |
| GNPDA2     | 4p12           | 0.056143 | 0.273704 | 0.370795 |
| FGF7P3     | 9p12           | -0.05614 | 0.27375  | 0.37081  |
| GEN1       | 2p24.2         | -0.05614 | 0.273752 | 0.37081  |
| SCGB3A2    | 5q32           | -0.05613 | 0.273795 | 0.370841 |
| SIX3       | 2p21           | 0.05613  | 0.273812 | 0.370841 |

|              |               |          |          |          |
|--------------|---------------|----------|----------|----------|
| DEPDC5       | 22q12.2-q12.3 | 0.056118 | 0.273914 | 0.370954 |
| SART3        | 12q23.3       | 0.05611  | 0.273988 | 0.371029 |
| PRXL2C       | 9q22.33       | 0.056107 | 0.274015 | 0.371041 |
| FAM149B1     | 10q22.2       | 0.056096 | 0.274106 | 0.371139 |
| TBC1D3H      | 17q12         | -0.05609 | 0.274185 | 0.371211 |
| TMPRSS13     | 11q23.3       | -0.05609 | 0.274196 | 0.371211 |
| ORM1         | 9q32          | -0.05607 | 0.274293 | 0.371317 |
| ATF3         | 1q32.3        | 0.056018 | 0.274774 | 0.371943 |
| PSG2         | 19q13.31      | 0.056006 | 0.274882 | 0.372064 |
| FAM72B       | 1p11.2        | -0.056   | 0.274908 | 0.372074 |
| MMD          | 17q22         | 0.055998 | 0.274946 | 0.3721   |
| LINC01119    | 2p21          | -0.05599 | 0.275011 | 0.372132 |
| LCE3C        | 1q21.3        | 0.05599  | 0.27502  | 0.372132 |
| CARF         | 2q33.2        | 0.055989 | 0.275025 | 0.372132 |
| SLC6A5       | 11p15.1       | 0.055975 | 0.275141 | 0.372264 |
| OTUD3        | 1p36.13       | -0.05596 | 0.275243 | 0.372367 |
| NFYA         | 6p21.1        | 0.055962 | 0.275254 | 0.372367 |
| WFDC1        | 16q24.1       | 0.055953 | 0.275334 | 0.372449 |
| GRIN2D       | 19q13.33      | -0.05593 | 0.275525 | 0.372682 |
| MMP11        | 22q11.23      | 0.055913 | 0.27568  | 0.372867 |
| OR7C2        | 19p13.12      | 0.055904 | 0.275755 | 0.372944 |
| TSPY26P      | 20q11.21      | 0.055864 | 0.276096 | 0.373379 |
| RTN4RL1      | 17p13.3       | 0.05586  | 0.276136 | 0.373405 |
| DRC3         | 17p11.2       | 0.055858 | 0.276152 | 0.373405 |
| RPF1         | 1p22.3        | -0.05583 | 0.276421 | 0.373744 |
| ALKAL2       | 2p25.3        | 0.05582  | 0.276474 | 0.37379  |
| CASC15       | 6p22.3        | -0.05581 | 0.276594 | 0.373926 |
| NFRKB        | 11q24.3       | -0.0558  | 0.276674 | 0.374009 |
| DENND4B      | 1q21.3        | 0.055784 | 0.276789 | 0.374139 |
| LGSN         | 6q12          | 0.055757 | 0.277022 | 0.374429 |
| NEIL2        | 8p23.1        | -0.05571 | 0.277402 | 0.374918 |
| LINC00661    | 19p13.12      | 0.055702 | 0.2775   | 0.375024 |
| TUBB8        | 10p15.3       | 0.05569  | 0.277604 | 0.37514  |
| PDZK1IP1     | 1p33          | -0.05569 | 0.277633 | 0.375153 |
| ATP9A        | 20q13.2       | 0.055665 | 0.277819 | 0.375379 |
| C3ORF14      | 3p14.2        | -0.05566 | 0.277884 | 0.375442 |
| LOC100190986 | 16p12.2       | 0.055655 | 0.277902 | 0.375442 |
| ADARB1       | 21q22.3       | 0.055648 | 0.277966 | 0.375502 |
| FAM182B      | 20p11.1       | -0.05561 | 0.278257 | 0.37587  |
| PRIMPOL      | 4q35.1        | 0.055612 | 0.278277 | 0.375872 |
| FBXO43       | 8q22.2        | -0.05561 | 0.278303 | 0.375879 |
| CYP4F30P     | 2q21.1        | 0.055607 | 0.27832  | 0.375879 |
| PRCC         | 1q23.1        | 0.055596 | 0.278409 | 0.375974 |
| KCNA7        | 19q13.33      | -0.05559 | 0.278458 | 0.376016 |
| RPUSD2       | 15q15.1       | -0.05557 | 0.278663 | 0.376266 |
| MROH8        | 20q11.23      | -0.05555 | 0.278784 | 0.376404 |
| AGTPBP1      | 9q21.33       | -0.05555 | 0.27884  | 0.376455 |
| FOLH1        | 11p11.12      | 0.05554  | 0.278901 | 0.376512 |
| FKBP9        | 7p14.3        | 0.055536 | 0.278935 | 0.376532 |
| CABLES1      | 18q11.2       | 0.055525 | 0.279028 | 0.376617 |
| FSCB         | 14q21.2       | 0.055524 | 0.279036 | 0.376617 |
| PLPPR5       | 1p21.3        | 0.055519 | 0.27908  | 0.376638 |
| MS4A5        | 11q12.2       | -0.05552 | 0.279089 | 0.376638 |
| SMCO1        | 3q29          | 0.055516 | 0.279108 | 0.376639 |
| TPMT         | 6p22.3        | -0.05551 | 0.279144 | 0.376662 |
| OSTCP1       | 6q25.3        | -0.05549 | 0.279351 | 0.376916 |
| CPT1C        | 19q13.33      | 0.055478 | 0.279436 | 0.377004 |
| WDR6         | 3p21.31       | -0.05548 | 0.27946  | 0.377004 |

|                  |                   |          |          |          |
|------------------|-------------------|----------|----------|----------|
| SLC9A3           | 5p15.33           | -0.05547 | 0.279473 | 0.377004 |
| ACOT2            | 14q24.3           | 0.055449 | 0.279684 | 0.377264 |
| SLC17A4          | 6p22.2            | 0.05544  | 0.279766 | 0.377349 |
| VPREB3           | 22q11.23 22q11    | 0.055424 | 0.279906 | 0.377513 |
| DDB2             | 11p11.2           | 0.055421 | 0.279931 | 0.37752  |
| GDF11            | 12q13.2           | -0.05542 | 0.279953 | 0.377525 |
| GBA              | 1q22              | 0.055408 | 0.280043 | 0.377621 |
| SEPTIN2          | 2q37.3            | 0.0554   | 0.280114 | 0.377691 |
| LRIT2            | 10q23.1           | -0.05539 | 0.280242 | 0.377838 |
| PRAMEF9          | 1p36.21           | -0.05537 | 0.280374 | 0.377991 |
| PLD3             | 19q13.2           | 0.055355 | 0.280502 | 0.378138 |
| TMEM88B          | 1p36.33           | -0.05535 | 0.280539 | 0.378162 |
| SLC35D3          | 6q23.3            | -0.05534 | 0.280607 | 0.378229 |
| ACAT2            | 6q25.3            | -0.05534 | 0.280671 | 0.378289 |
| HOXA6            | 7p15.2            | 0.055326 | 0.280761 | 0.378385 |
| CYB561D1         | 1p13.3            | 0.055284 | 0.281121 | 0.378844 |
| TDRD12           | 19q13.11          | 0.055231 | 0.281582 | 0.37944  |
| ART3             | 4q21.1 4p15.1-p14 | 0.05522  | 0.281682 | 0.379549 |
| CRNN             | 1q21.3            | 0.055208 | 0.281789 | 0.379653 |
| UBE2E3           | 2q31.3            | 0.055207 | 0.281797 | 0.379653 |
| TBC1D3P1-DHX40P1 | 17q23.1           | 0.055204 | 0.28182  | 0.379659 |
| ST14             | 11q24.3           | -0.05519 | 0.28193  | 0.379782 |
| BOLL             | 2q33.1            | 0.055154 | 0.28226  | 0.380201 |
| PLD5             | 1q43              | 0.055143 | 0.282355 | 0.380303 |
| RFX2             | 19p13.3           | -0.05512 | 0.282532 | 0.380516 |
| CASP3            | 4q35.1            | 0.055115 | 0.2826   | 0.380582 |
| SMIM10           | Xq26.3            | 0.055094 | 0.282783 | 0.380802 |
| LINC00475        | 9q22.31           | 0.055089 | 0.282827 | 0.380836 |
| ZNF606           | 19q13.43          | -0.05507 | 0.283018 | 0.381068 |
| UGT2B10          | 4q13.2            | -0.05504 | 0.283271 | 0.381374 |
| AMY2A            | 1p21.1            | -0.05504 | 0.283284 | 0.381374 |
| OR2T5            | 1q44              | 0.055034 | 0.283311 | 0.381385 |
| GPR61            | 1p13.3            | -0.05503 | 0.28338  | 0.381452 |
| SLC12A5          | 20q13.12          | -0.05502 | 0.283436 | 0.381503 |
| SERPINB6         | 6p25.2            | -0.055   | 0.283575 | 0.381663 |
| ZNF275           | Xq28              | 0.054988 | 0.283712 | 0.381823 |
| EDN1             | 6p24.1            | 0.054969 | 0.28388  | 0.382023 |
| ZIC1             | 3q24              | -0.05496 | 0.283976 | 0.382126 |
| TEKT2            | 1p34.3            | -0.05495 | 0.28401  | 0.382146 |
| OOSP2            | 11q12.1           | 0.05494  | 0.284131 | 0.382283 |
| IDI1             | 10p15.3           | 0.054935 | 0.284175 | 0.382317 |
| PCGF2            | 17q12             | 0.054927 | 0.284251 | 0.382393 |
| MSMB             | 10q11.22          | 0.054902 | 0.28447  | 0.382662 |
| ADAM30           | 1p12              | 0.054884 | 0.284624 | 0.382835 |
| CHD6             | 20q12             | 0.054883 | 0.284636 | 0.382835 |
| XAGE5            | Xp11.22           | -0.05488 | 0.284666 | 0.38285  |
| ARF1             | 1q42.13           | -0.05487 | 0.284765 | 0.382957 |
| WDR72            | 15q21.3           | 0.054862 | 0.284818 | 0.383002 |
| PF4V1            | 4q13.3            | -0.05486 | 0.28487  | 0.383046 |
| SSR3             | 3q25.31           | 0.054853 | 0.284898 | 0.383058 |
| PPP2R2D          | 10q26.3           | -0.05484 | 0.285004 | 0.383175 |
| BRCC3            | Xq28              | -0.05484 | 0.285032 | 0.383187 |
| SRY              | Yp11.2            | -0.05482 | 0.285144 | 0.383299 |
| LRRRC71          | 1q23.1            | -0.05482 | 0.285163 | 0.383299 |
| HTN1             | 4q13.3            | 0.054822 | 0.285173 | 0.383299 |
| CXCL17           | 19q13.2           | 0.054794 | 0.285419 | 0.383604 |
| HCAR3            | 12q24.31          | 0.054788 | 0.285466 | 0.383642 |
| HUS1             | 7p12.3            | -0.05478 | 0.285527 | 0.383697 |

|            |               |          |          |          |
|------------|---------------|----------|----------|----------|
| TLX3       | 5q35.1        | -0.05478 | 0.285555 | 0.383709 |
| MAD2L1BP   | 6p21.1        | -0.05476 | 0.285707 | 0.383888 |
| SNORA5A    | 7p13          | -0.05475 | 0.285815 | 0.384007 |
| GABRR2     | 6q15          | 0.054716 | 0.286099 | 0.384364 |
| FAM138B    | 2q14.1        | -0.05471 | 0.28614  | 0.384371 |
| APOBEC4    | 1q25.3        | 0.054712 | 0.286143 | 0.384371 |
| ASIC5      | 4q32.1        | -0.0547  | 0.286203 | 0.384426 |
| SPRY3      | Xq28 and Yq12 | 0.054701 | 0.286232 | 0.384438 |
| LRRC37B    | 17q11.2       | -0.0547  | 0.286272 | 0.384467 |
| SUGCT      | 7p14.1        | -0.05469 | 0.28631  | 0.384493 |
| C14ORF180  | 14q32.33      | 0.054665 | 0.286557 | 0.384798 |
| GGNBP1     | 6p21.31       | -0.05466 | 0.286607 | 0.38484  |
| GOLGA2P10  | 15q25.2       | -0.05461 | 0.287014 | 0.38536  |
| GMFG       | 19q13.2       | 0.05461  | 0.287042 | 0.385372 |
| USP27X-AS1 | Xp11.23       | -0.0546  | 0.287128 | 0.385461 |
| MBLAC2     | 5q14.3        | 0.054595 | 0.287174 | 0.385497 |
| PTCRA      | 6p21.1        | 0.054589 | 0.287222 | 0.385536 |
| NBEAP1     | 15q11.2       | 0.054558 | 0.287499 | 0.385881 |
| IMPA2      | 18p11.21      | 0.054553 | 0.287539 | 0.38591  |
| LOC284788  | 20p11.21      | -0.05455 | 0.287607 | 0.385976 |
| ALDH3B2    | 11q13.2       | -0.05452 | 0.287802 | 0.386211 |
| GRID2      | 4q22.1-q22.2  | 0.054507 | 0.287951 | 0.386385 |
| SSTR5      | 16p13.3       | -0.0545  | 0.287987 | 0.386407 |
| LINC00696  | 3p21.2        | 0.054473 | 0.288249 | 0.386733 |
| COMMD10    | 5q23.1        | -0.05447 | 0.288285 | 0.386755 |
| NMUR1      | 2q37.1        | 0.05446  | 0.288369 | 0.386842 |
| GOLGA2P5   | 12q23.1       | -0.05445 | 0.288432 | 0.3869   |
| FOXP4      | 6p21.1        | -0.05444 | 0.288525 | 0.387    |
| F2         | 11p11.2       | -0.05443 | 0.288609 | 0.387086 |
| UTP3       | 4q13.3        | -0.05443 | 0.288663 | 0.387129 |
| KIAA1107   | 1p22.1        | 0.054423 | 0.288692 | 0.387129 |
| SDAD1      | 4q21.1        | -0.05442 | 0.288699 | 0.387129 |
| PCDHA9     | 5q31.3        | -0.05439 | 0.289028 | 0.387545 |
| AKR1D1     | 7q33          | -0.05436 | 0.28926  | 0.387829 |
| KPNB1      | 17q21.32      | 0.054341 | 0.289422 | 0.388021 |
| CNPY4      | 7q22.1        | -0.05433 | 0.289496 | 0.388095 |
| UCKL1-AS1  | 20q13.33      | -0.05432 | 0.289623 | 0.388238 |
| EIF5A2     | 3q26.2        | 0.054294 | 0.289843 | 0.388504 |
| CHD7       | 8q12.2        | 0.054291 | 0.289868 | 0.388504 |
| ZNF33B     | 10q11.21      | 0.05429  | 0.289879 | 0.388504 |
| ZSCAN4     | 19q13.43      | 0.054276 | 0.289998 | 0.388611 |
| SNORA71B   | 20q11.23      | -0.05428 | 0.289998 | 0.388611 |
| CT45A6     | Xq26.3        | -0.05427 | 0.290069 | 0.388681 |
| RRNAD1     | 1q23.1        | -0.05426 | 0.290146 | 0.388757 |
| SERPINA11  | 14q32.13      | 0.054236 | 0.290357 | 0.389014 |
| KRTAP5-6   | 11p15.5       | -0.05423 | 0.290411 | 0.38906  |
| CNN3       | 1p21.3        | 0.054227 | 0.290441 | 0.389074 |
| TMPRSS4    | 11q23.3       | 0.054223 | 0.290474 | 0.389092 |
| REXO1L1P   | 8q21.2        | 0.054203 | 0.290653 | 0.389306 |
| ZMYND12    | 1p34.2        | 0.054196 | 0.290717 | 0.389366 |
| TBC1D28    | 17p11.2       | -0.05419 | 0.290775 | 0.389397 |
| GRK7       | 3q23          | -0.05419 | 0.290779 | 0.389397 |
| KIR2DL3    | 19q13.42      | -0.05417 | 0.290954 | 0.389606 |
| PRSS54     | 16q21         | -0.05415 | 0.291151 | 0.389843 |
| PPIL4      | 6q25.1        | 0.054141 | 0.291205 | 0.389889 |
| LINC00599  | 8p23.1        | 0.054117 | 0.291421 | 0.390152 |
| AVP        | 20p13         | -0.05411 | 0.291499 | 0.39023  |
| ZNF823     | 19p13.2       | -0.05411 | 0.291518 | 0.39023  |

|              |             |          |          |          |
|--------------|-------------|----------|----------|----------|
| CHST7        | Xp11.3      | 0.054095 | 0.291618 | 0.390281 |
| SNORA9       | 7p13        | -0.05409 | 0.291627 | 0.390281 |
| ECH1         | 19q13.2     | -0.05409 | 0.291628 | 0.390281 |
| C3ORF79      | 3q25.2      | 0.054093 | 0.291634 | 0.390281 |
| PHYHIP       | 8p21.3      | 0.054079 | 0.291755 | 0.390416 |
| IDO2         | 8p11.21     | 0.054057 | 0.291956 | 0.390659 |
| CXXC4        | 4q24        | 0.054054 | 0.291986 | 0.390673 |
| GIN1         | 5q21.1      | 0.054049 | 0.292022 | 0.390696 |
| GPR52        | 1q25.1      | -0.05404 | 0.29215  | 0.39084  |
| GPR4         | 19q13.32    | 0.054029 | 0.292209 | 0.390894 |
| RRAS2        | 11p15.2     | -0.05402 | 0.292298 | 0.390986 |
| GAS2L2       | 17q12       | 0.054    | 0.292462 | 0.39118  |
| LOC100240735 | 12q13.13    | 0.05397  | 0.292735 | 0.391519 |
| ZDHHC17      | 12q21.2     | 0.053962 | 0.292804 | 0.391562 |
| SEC16B       | 1q25.2      | 0.053962 | 0.292806 | 0.391562 |
| RUNDC3A      | 17q21.31    | -0.05395 | 0.292953 | 0.391732 |
| GPR75        | 2p16.2      | 0.053933 | 0.293066 | 0.391857 |
| HIF3A        | 19q13.32    | -0.05392 | 0.29314  | 0.39193  |
| MYO18B       | 22q12.1     | 0.053919 | 0.293189 | 0.391969 |
| MCUB         | 4q25        | 0.053892 | 0.29343  | 0.392265 |
| CIDEA        | 18p11.21 18 | 0.053884 | 0.293505 | 0.392333 |
| ZNF107       | 7q11.21     | -0.05388 | 0.29352  | 0.392333 |
| VN1R10P      | 6p22.1      | -0.05387 | 0.293637 | 0.392464 |
| MOCOS        | 18q12.2     | 0.053864 | 0.293683 | 0.392498 |
| IGF2BP1      | 17q21.32    | -0.05385 | 0.293823 | 0.392644 |
| EPCAM        | 2p21        | -0.05385 | 0.293831 | 0.392644 |
| OR52L1       | 11p15.4     | 0.053833 | 0.29396  | 0.39279  |
| INTU         | 4q28.1      | -0.05383 | 0.293998 | 0.392814 |
| MLYCD        | 16q23.3     | -0.05382 | 0.294121 | 0.392953 |
| WDR1         | 4p16.1      | 0.053796 | 0.294296 | 0.39316  |
| HSD17B1      | 17q21.2     | -0.05377 | 0.294514 | 0.393426 |
| TGFBR3       | 1p22.1      | 0.053757 | 0.294642 | 0.39357  |
| SIRPB1       | 20p13       | 0.053755 | 0.294665 | 0.393575 |
| RPH3A        | 12q24.13    | 0.053734 | 0.29485  | 0.393795 |
| CCDC117      | 22q12.1     | 0.053724 | 0.294942 | 0.393892 |
| KRT25        | 17q21.2     | 0.053682 | 0.295322 | 0.394356 |
| ABCC12       | 16q12.1     | -0.05368 | 0.295329 | 0.394356 |
| PRSS57       | 19p13.3     | -0.05367 | 0.295451 | 0.394492 |
| OR10G9       | 11q24.2     | 0.053657 | 0.295545 | 0.394593 |
| OR56A1       | 11p15.4     | -0.05365 | 0.295636 | 0.394687 |
| FAM92B       | 16q24.1     | 0.053629 | 0.295798 | 0.394878 |
| KCNJ14       | 19q13.33    | -0.05358 | 0.296199 | 0.395386 |
| MEX3D        | 19p13.3     | -0.05358 | 0.296254 | 0.395433 |
| NEB          | 2q23.3      | -0.05356 | 0.296456 | 0.395677 |
| PNLIPRP1     | 10q25.3     | -0.05354 | 0.296599 | 0.395841 |
| FUCA1        | 1p36.11     | 0.053536 | 0.296633 | 0.39586  |
| LIPM         | 10q23.31    | -0.05353 | 0.296655 | 0.395863 |
| TGM5         | 15q15.2     | 0.053516 | 0.296815 | 0.396051 |
| ZNF534       | 19q13.41    | -0.05351 | 0.296876 | 0.396106 |
| C15ORF56     | 15q15.1     | -0.05351 | 0.296903 | 0.396114 |
| MPIG6B       | 6p21.33     | -0.0535  | 0.296969 | 0.396177 |
| MAGEB4       | Xp21.2      | 0.053497 | 0.296989 | 0.396177 |
| HSPA9        | 5q31.2      | -0.05349 | 0.297096 | 0.396293 |
| SCARNA15     | 15q25.2     | -0.05348 | 0.297116 | 0.396294 |
| DKKL1        | 19q13.33    | 0.053458 | 0.297341 | 0.396567 |
| SNORA22      | 7q11.21     | -0.05345 | 0.297382 | 0.396596 |
| FTMT         | 5q23.1      | -0.05341 | 0.297778 | 0.397079 |
| ACE2         | Xp22.2      | -0.05341 | 0.297784 | 0.397079 |

|           |               |          |          |          |
|-----------|---------------|----------|----------|----------|
| VPS36     | 13q14.3       | -0.0534  | 0.297823 | 0.397104 |
| FZD10     | 12q24.33      | -0.0534  | 0.29789  | 0.397166 |
| PROK2     | 3p13          | 0.053389 | 0.297969 | 0.397246 |
| GGA3      | 17q25.1       | -0.05338 | 0.298075 | 0.397361 |
| TMEM139   | 7q34          | -0.05337 | 0.298126 | 0.397402 |
| MASTL     | 10p12.1       | -0.05337 | 0.298173 | 0.397438 |
| SLC17A6   | 11p14.3       | -0.05335 | 0.298302 | 0.397584 |
| CLK4      | 5q35.3        | -0.05334 | 0.298381 | 0.397663 |
| PTPRQ     | 12q21.31      | 0.053334 | 0.298468 | 0.397753 |
| DCAF12L1  | Xq25          | 0.05332  | 0.298592 | 0.397891 |
| SPINK7    | 5q32          | 0.05329  | 0.298865 | 0.398221 |
| NUMA1     | 11q13.4       | 0.053288 | 0.29888  | 0.398221 |
| CLSTN3    | 12p13.31      | 0.053272 | 0.299026 | 0.39839  |
| OR52I2    | 11p15.4       | -0.05326 | 0.299127 | 0.398498 |
| JPH1      | 8q21.11       | 0.053242 | 0.299302 | 0.398705 |
| SLC16A1   | 1p13.2        | -0.05324 | 0.299333 | 0.39872  |
| LINC01102 | 2q12.1        | 0.053234 | 0.299376 | 0.39875  |
| LINC01465 | 12q14.1       | 0.053226 | 0.299447 | 0.398791 |
| SNX29P2   | 16p11.2       | 0.053226 | 0.299447 | 0.398791 |
| SMIM5     | 17q25.1       | 0.053223 | 0.29947  | 0.398796 |
| PDCD4-AS1 | 10q25.2       | 0.053219 | 0.299508 | 0.398819 |
| LRMDA     | 10q22.2-q22.3 | -0.05321 | 0.299596 | 0.398898 |
| COL26A1   | 7q22.1        | -0.05321 | 0.299607 | 0.398898 |
| NXF4      | Xq22.1        | -0.0532  | 0.299677 | 0.398965 |
| EEF1AKMT3 | 12q14.1       | -0.05319 | 0.299737 | 0.399018 |
| RXRG      | 1q23.3        | -0.05319 | 0.299792 | 0.399044 |
| CMTM5     | 14q11.2       | 0.053188 | 0.299796 | 0.399044 |
| TNFRSF10C | 8p21.3        | 0.053155 | 0.300089 | 0.399408 |
| DPP10     | 2q14.1        | 0.053153 | 0.300114 | 0.399414 |
| RBM14     | 11q13.2       | -0.05315 | 0.30014  | 0.399423 |
| DUSP5     | 10q25.2       | 0.053126 | 0.30036  | 0.399682 |
| SNORA64   | 16p13.3       | 0.053124 | 0.300376 | 0.399682 |
| EPS8L3    | 1p13.3        | -0.05312 | 0.300407 | 0.399698 |
| TOPAZ1    | 3p21.31       | -0.0531  | 0.300581 | 0.399903 |
| MICAL1    | 6q21          | -0.05308 | 0.300754 | 0.400107 |
| RRN3      | 16p13.11      | 0.053071 | 0.300856 | 0.400216 |
| TICAM2    | 5q22.3        | 0.053057 | 0.300988 | 0.400364 |
| CDRT1     | 17p12         | 0.053051 | 0.301038 | 0.400404 |
| SLC48A1   | 12q13.11      | -0.05303 | 0.301222 | 0.400622 |
| SNAR-G2   | 19q13.33      | -0.05303 | 0.301277 | 0.400668 |
| MAGEE1    | Xq13.3        | 0.053006 | 0.301456 | 0.400858 |
| ENDOU     | 12q13.11      | 0.053004 | 0.301471 | 0.400858 |
| ZNF620    | 3p22.1        | 0.053003 | 0.301479 | 0.400858 |
| FBXO42    | 1p36.13       | -0.05298 | 0.3017   | 0.401124 |
| SMIM15    | 5q12.1        | 0.052968 | 0.301802 | 0.401234 |
| HAS2-AS1  | 8q24.13       | -0.05296 | 0.301872 | 0.401301 |
| OR1C1     | 1q44          | 0.052945 | 0.302013 | 0.401456 |
| S100A1    | 1q21.3        | 0.052943 | 0.302029 | 0.401456 |
| C5ORF30   | 5q21.1        | 0.052938 | 0.302075 | 0.401491 |
| BAGE      | 21p11.1       | 0.052923 | 0.302215 | 0.401649 |
| RFPL1     | 22q12.2       | -0.0529  | 0.30238  | 0.401842 |
| GPR89B    | 1q21.2        | -0.05287 | 0.30267  | 0.402202 |
| C20ORF173 | 20q11.22      | 0.05287  | 0.3027   | 0.402214 |
| KBTBD2    | 7p14.3        | 0.052867 | 0.302726 | 0.402222 |
| ATP6AP1L  | 5q14.2        | -0.05286 | 0.302765 | 0.402247 |
| ELP5      | 17p13.1       | -0.05286 | 0.302824 | 0.402299 |
| KLF10     | 8q22.3        | 0.052839 | 0.302984 | 0.402479 |
| CLPTM1    | 19q13.32      | 0.052837 | 0.303    | 0.402479 |

|           |                |          |          |          |
|-----------|----------------|----------|----------|----------|
| FAM131B   | 7q34           | -0.05283 | 0.303046 | 0.402514 |
| ING2      | 4q35.1         | -0.05282 | 0.30311  | 0.402572 |
| POGLUT1   | 3q13.33        | 0.052791 | 0.30342  | 0.402957 |
| FREM1     | 9p22.3         | -0.05279 | 0.303458 | 0.40298  |
| EIF5B     | 2q11.2         | -0.05277 | 0.303637 | 0.403192 |
| CDA       | 1p36.12        | -0.05274 | 0.303871 | 0.403475 |
| SPATA31D4 | 9q21.32        | -0.05273 | 0.304015 | 0.40364  |
| ATPAF2    | 17p11.2        | -0.05272 | 0.30406  | 0.403674 |
| NKX2-6    | 8p21.2         | 0.052717 | 0.304099 | 0.403698 |
| TRAPPC3L  | 6q22.1         | 0.052706 | 0.304201 | 0.403807 |
| NPVF      | 7p15.3         | 0.052696 | 0.304291 | 0.40389  |
| OR8K3     | 11q12.1        | -0.05269 | 0.304304 | 0.40389  |
| PRPSAP2   | 17p11.2        | 0.052683 | 0.30441  | 0.40399  |
| TUBA3E    | 2q21.1         | -0.05268 | 0.30442  | 0.40399  |
| CFAP53    | 18q21.1        | -0.05268 | 0.30444  | 0.40399  |
| C18ORF54  | 18q21.2        | 0.052664 | 0.304585 | 0.404155 |
| PLEKHH3   | 17q21.2        | -0.05264 | 0.304798 | 0.404377 |
| CETN1     | 18p11.32       | -0.05264 | 0.304804 | 0.404377 |
| NUP188    | 9q34.11        | 0.052639 | 0.304812 | 0.404377 |
| CLK2      | 1q22           | -0.05261 | 0.305044 | 0.404658 |
| SHROOM2   | Xp22.2         | -0.05261 | 0.305088 | 0.404689 |
| C1ORF229  | 1q44           | 0.052603 | 0.305152 | 0.404747 |
| EPS15L1   | 19p13.11       | 0.052589 | 0.305278 | 0.404861 |
| ENDOV     | 17q25.3        | 0.052589 | 0.305278 | 0.404861 |
| IRF9      | 14q12          | 0.052586 | 0.305304 | 0.404868 |
| IL25      | 14q11.2        | 0.052562 | 0.305526 | 0.405136 |
| NXF2B     | Xq22.1         | -0.05256 | 0.305582 | 0.405183 |
| PFAS      | 17p13.1        | 0.052545 | 0.305681 | 0.405287 |
| USP28     | 11q23.2        | 0.052534 | 0.305782 | 0.405395 |
| MPPED1    | 22q13.2        | 0.052512 | 0.305987 | 0.40564  |
| DNM1L     | 12p11.21       | -0.05251 | 0.30601  | 0.405644 |
| HOXC10    | 12q13.13       | 0.0525   | 0.306095 | 0.405729 |
| AIF1L     | 9q34.12-q34.13 | 0.052495 | 0.306141 | 0.405764 |
| SCAMP5    | 15q24.2        | -0.05249 | 0.306187 | 0.405797 |
| PROKR2    | 20p12.3        | 0.052471 | 0.306364 | 0.406006 |
| GRM8      | 7q31.33        | 0.052466 | 0.306411 | 0.406041 |
| IMMT      | 2p11.2 2       | 0.05246  | 0.306469 | 0.406091 |
| ADGRG5    | 16q21          | 0.052442 | 0.306634 | 0.406274 |
| CYP4F22   | 19p13.12       | 0.052438 | 0.306666 | 0.406274 |
| AMELY     | Yp11.2         | -0.05244 | 0.306668 | 0.406274 |
| FBXL3     | 13q22.3        | 0.052424 | 0.306797 | 0.406418 |
| RFX1      | 19p13.12       | 0.05241  | 0.306925 | 0.406561 |
| STX19     | 3q11.2         | 0.052397 | 0.307046 | 0.406694 |
| POU3F2    | 6q16.1         | 0.052386 | 0.307148 | 0.406795 |
| OTUB2     | 14q32.12       | 0.052385 | 0.307163 | 0.406795 |
| OCSTAMP   | 20q13.12       | -0.05236 | 0.307416 | 0.407103 |
| RSPH1     | 21q22.3        | -0.05233 | 0.307669 | 0.407411 |
| TWIST1    | 7p21.1         | 0.052322 | 0.307741 | 0.407479 |
| USP4      | 3p21.31        | 0.052314 | 0.307813 | 0.407548 |
| TPM2      | 9p13.3         | -0.05231 | 0.30786  | 0.407561 |
| NCR3      | 6p21.33        | 0.052309 | 0.307864 | 0.407561 |
| PCOLCE    | 7q22.1         | 0.052306 | 0.307894 | 0.407575 |
| PDLIM4    | 5q31.1         | 0.052298 | 0.307968 | 0.407646 |
| MGC27382  | 1p31.1         | -0.05228 | 0.308104 | 0.407798 |
| TTY16     | Yp11.2         | -0.05227 | 0.308261 | 0.40798  |
| NEURL1B   | 5q35.1         | 0.052221 | 0.308683 | 0.40851  |
| PNMA3     | Xq28           | 0.052217 | 0.308716 | 0.408528 |
| USP17L6P  | 4p16.1         | -0.05221 | 0.308767 | 0.408568 |



|           |               |          |          |          |
|-----------|---------------|----------|----------|----------|
| DTD2      | 14q12         | -0.05219 | 0.308944 | 0.408776 |
| ALDH3B1   | 11q13.2       | 0.052177 | 0.309084 | 0.408934 |
| ZSCAN9    | 6p22.1        | -0.05217 | 0.309182 | 0.409036 |
| DDX43     | 6q13          | 0.052162 | 0.309227 | 0.409068 |
| SLC25A37  | 8p21.2        | 0.052159 | 0.30925  | 0.409072 |
| SURF4     | 9q34.2        | -0.05215 | 0.309344 | 0.409169 |
| CRIP2     | 14q32.33      | 0.052146 | 0.309378 | 0.409174 |
| ARRDC2    | 19p13.11      | -0.05214 | 0.309388 | 0.409174 |
| DCAF12L2  | Xq25          | 0.052128 | 0.309537 | 0.409336 |
| SULT4A1   | 22q13.31      | 0.052127 | 0.309552 | 0.409336 |
| MAGEH1    | Xp11.21       | 0.052102 | 0.309784 | 0.409616 |
| CRELD1    | 3p25.3        | -0.0521  | 0.309842 | 0.409666 |
| CASP1     | 11q22.3       | -0.05209 | 0.309868 | 0.409673 |
| TRAM1     | 8q13.3        | 0.052081 | 0.309974 | 0.409787 |
| PACRG-AS1 | 6q26          | -0.05207 | 0.310035 | 0.40984  |
| SEPTIN7   | 7p14.2        | 0.05207  | 0.310079 | 0.40987  |
| SNORA13   | 5q22.1        | 0.052045 | 0.310317 | 0.410159 |
| LOC730668 | 22q13.31      | -0.05202 | 0.310545 | 0.410432 |
| ZP1       | 11q12.2       | -0.05202 | 0.310579 | 0.41045  |
| TESC      | 12q24.22      | -0.05201 | 0.310666 | 0.410519 |
| LRPPRC    | 2p21          | -0.05201 | 0.310672 | 0.410519 |
| SF3B4     | 1q21.2        | -0.05199 | 0.31081  | 0.410675 |
| ATF5      | 19q13.33      | 0.051982 | 0.310905 | 0.410772 |
| C12ORF75  | 12q23.3       | -0.05198 | 0.310939 | 0.41079  |
| IL20      | 1q32.1        | -0.05197 | 0.310978 | 0.410815 |
| PLCB4     | 20p12.3-p12.2 | 0.051966 | 0.311047 | 0.410879 |
| MSX2P1    | 17q22         | -0.05195 | 0.311185 | 0.411035 |
| SLC7A6    | 16q22.1       | -0.05193 | 0.311413 | 0.411308 |
| ANKRD33   | 12q13.13      | -0.05192 | 0.311516 | 0.411417 |
| NME5      | 5q31.2        | 0.051911 | 0.311564 | 0.411453 |
| DSC3      | 18q12.1       | 0.051894 | 0.311726 | 0.411631 |
| TUBB7P    | 4q35.2        | 0.051892 | 0.311739 | 0.411631 |
| RNF5P1    | 8p11.22       | -0.05188 | 0.311839 | 0.411735 |
| FAM71E2   | 19q13.42      | -0.05186 | 0.312021 | 0.41193  |
| TRIM21    | 11p15.4       | 0.051861 | 0.312028 | 0.41193  |
| ALPG      | 2q37.1        | 0.051856 | 0.312077 | 0.411968 |
| OMA1      | 1p32.2-p32.1  | 0.051851 | 0.31212  | 0.411998 |
| NBPF3     | 1p36.12       | 0.051846 | 0.31217  | 0.412027 |
| OR4M2     | 15q11.2       | -0.05184 | 0.312186 | 0.412027 |
| KRTAP11-1 | 21q22.11      | 0.051841 | 0.312218 | 0.412027 |
| LONRF1    | 8p23.1        | 0.05184  | 0.312225 | 0.412027 |
| UPP2      | 2q24.1        | -0.05181 | 0.312482 | 0.412339 |
| OXGR1     | 13q32.1       | 0.051807 | 0.312535 | 0.412382 |
| TNNI1     | 1q32.1        | 0.0518   | 0.312599 | 0.41244  |
| KLKP1     | 19q13.33      | -0.05178 | 0.312752 | 0.412614 |
| RAX       | 18q21.32      | 0.051769 | 0.312888 | 0.412766 |
| ARHGAP4   | Xq28          | 0.051757 | 0.312998 | 0.412879 |
| LINC00705 | 10p15.1       | 0.051756 | 0.313015 | 0.412879 |
| CD58      | 1p13.1        | -0.05173 | 0.31322  | 0.413123 |
| AMER1     | Xq11.2        | -0.05168 | 0.313732 | 0.413758 |
| MYH6      | 14q11.2       | -0.05168 | 0.313743 | 0.413758 |
| CYB5R1    | 1q32.1        | 0.051664 | 0.313871 | 0.4139   |
| NOA1      | 4q12          | 0.05165  | 0.314007 | 0.414051 |
| NTNG2     | 9q34.13       | 0.05164  | 0.314098 | 0.414144 |
| SDS       | 12q24.13      | 0.051625 | 0.314236 | 0.414299 |
| TAF3      | 1p13.2        | -0.05161 | 0.314377 | 0.414457 |
| OR4C15    | 11q11         | 0.051594 | 0.31453  | 0.414632 |
| POLQ      | 3q13.33       | -0.05159 | 0.314615 | 0.414717 |

|               |          |          |          |          |
|---------------|----------|----------|----------|----------|
| C17ORF78      | 17q12    | 0.05158  | 0.314663 | 0.414753 |
| NOM1          | 7q36.3   | -0.05158 | 0.314688 | 0.414758 |
| TMEM164       | Xq23     | -0.05155 | 0.314931 | 0.415051 |
| DND1          | 5q31.3   | -0.05154 | 0.315022 | 0.41513  |
| GMDS          | 6p25.3   | 0.051541 | 0.315032 | 0.41513  |
| LINC01591     | 8q24.22  | 0.051526 | 0.315166 | 0.41528  |
| LRRC70        | 5q12.1   | -0.0515  | 0.315426 | 0.415594 |
| NKX6-1        | 4q21.23  | 0.051491 | 0.315498 | 0.415655 |
| RCN3          | 19q13.33 | -0.05149 | 0.315514 | 0.415655 |
| ARHGEF26      | 3q25.2   | 0.051486 | 0.315542 | 0.415666 |
| SYT3          | 19q13.33 | 0.051462 | 0.315776 | 0.415946 |
| FASN          | 17q25.3  | 0.051459 | 0.3158   | 0.41595  |
| ZNF569        | 19q13.12 | 0.051449 | 0.315899 | 0.416053 |
| CIDEC         | 3p25.3   | 0.051427 | 0.3161   | 0.41629  |
| OVCA2         | 17p13.3  | -0.05142 | 0.31613  | 0.416303 |
| RUBCNL        | 13q14.13 | -0.05142 | 0.316209 | 0.41638  |
| PAX4          | 7q32.1   | 0.051408 | 0.316277 | 0.416442 |
| SDHAP3        | 5p15.33  | -0.0514  | 0.316311 | 0.416459 |
| METTL8        | 2q31.1   | -0.0514  | 0.316386 | 0.41653  |
| ALPP          | 2q37.1   | 0.051385 | 0.316498 | 0.416651 |
| PAXIP1        | 7q36.2   | -0.05138 | 0.316534 | 0.416671 |
| NMNAT1        | 1p36.22  | 0.051367 | 0.316666 | 0.416817 |
| SDR16C6P      | 8q12.1   | -0.05134 | 0.316953 | 0.417167 |
| AMBN          | 4q13.3   | -0.0513  | 0.317291 | 0.417585 |
| SLC22A18AS    | 11p15.4  | -0.05128 | 0.317461 | 0.417763 |
| CHAF1A        | 19p13.3  | -0.05128 | 0.317485 | 0.417763 |
| KIAA1324L     | 7q21.12  | 0.05128  | 0.317489 | 0.417763 |
| MAP2K6        | 17q24.3  | 0.051266 | 0.317617 | 0.417904 |
| SCARNA8       | 9p22.1   | -0.05125 | 0.317764 | 0.418056 |
| OSBPL3        | 7p15.3   | -0.05125 | 0.317774 | 0.418056 |
| KRT6A         | 12q13.13 | 0.051235 | 0.317914 | 0.418213 |
| ZW10          | 11q23.2  | -0.0512  | 0.318265 | 0.418646 |
| AMIGO3        | 3p21.31  | -0.05119 | 0.318316 | 0.418686 |
| MNAT1         | 14q23.1  | -0.05118 | 0.318432 | 0.418789 |
| ATP1A3        | 19q13.2  | 0.05118  | 0.318436 | 0.418789 |
| MGC57346      | 17q21.31 | -0.05117 | 0.318518 | 0.418869 |
| CCN6          | 6q21     | -0.05117 | 0.318543 | 0.418874 |
| ZNF568        | 19q13.12 | 0.051156 | 0.318666 | 0.419009 |
| DNAJC25-GNG10 | 9q31.3   | 0.05112  | 0.318999 | 0.419419 |
| UHRF1         | 19p13.3  | 0.051105 | 0.319144 | 0.419582 |
| TFG           | 3q12.2   | 0.051099 | 0.319203 | 0.419632 |
| FRG2DP        | 16p11.1  | -0.0511  | 0.319231 | 0.419641 |
| DISP3         | 1p36.22  | 0.051089 | 0.319299 | 0.419703 |
| ANKRD7        | 7q31.31  | -0.05105 | 0.31966  | 0.420151 |
| THAP9         | 4q21.22  | -0.05105 | 0.319687 | 0.420158 |
| POU6F2        | 7p14.1   | -0.05104 | 0.319735 | 0.420194 |
| KCNJ13        | 2q37.1   | 0.051028 | 0.319874 | 0.420348 |
| CTAGE4        | 7q35     | 0.051018 | 0.319971 | 0.420449 |
| CAP2          | 6p22.3   | 0.050996 | 0.320184 | 0.420701 |
| LINC00671     | 17q21.31 | -0.05099 | 0.320241 | 0.420748 |
| TNFAIP1       | 17q11.2  | 0.050969 | 0.320436 | 0.420976 |
| GLYAT         | 11q12.1  | -0.05096 | 0.320559 | 0.421078 |
| FOXE1         | 9q22.33  | -0.05095 | 0.320578 | 0.421078 |
| PIZO1         | 16q24.3  | 0.050952 | 0.320595 | 0.421078 |
| ETNPPL        | 4q25     | -0.05095 | 0.320597 | 0.421078 |
| CNEP1R1       | 16q12.1  | -0.05095 | 0.320663 | 0.421137 |
| LETM2         | 8p11.23  | 0.050886 | 0.321224 | 0.421846 |
| NFYB          | 12q23.3  | 0.050874 | 0.321341 | 0.421972 |

|            |              |          |          |          |
|------------|--------------|----------|----------|----------|
| IL1RL2     | 2q12.1       | 0.050845 | 0.321616 | 0.422305 |
| TSEN15     | 1q25.3       | -0.05081 | 0.321922 | 0.422679 |
| LOC6444669 | 18p11.21     | -0.0508  | 0.322025 | 0.422764 |
| NR2F1      | 5q15         | 0.050802 | 0.322028 | 0.422764 |
| SMNDC1     | 10q25.2      | -0.05079 | 0.322162 | 0.422908 |
| RNF139     | 8q24.13      | -0.05079 | 0.32218  | 0.422908 |
| TRIM71     | 3p22.3       | -0.05078 | 0.322221 | 0.422918 |
| SPANXA2    | Xq27.2       | -0.05078 | 0.32223  | 0.422918 |
| ZCCHC14    | 16q24.2      | 0.050773 | 0.322303 | 0.422986 |
| IQCE       | 7p22.3       | -0.05077 | 0.322324 | 0.422986 |
| LTC4S      | 5q35.3       | 0.050768 | 0.322352 | 0.422995 |
| TAS2R43    | 12p13.2      | 0.050752 | 0.322502 | 0.423164 |
| HOXC6      | 12q13.13     | 0.050748 | 0.322543 | 0.42319  |
| FOXN3-AS2  | 14q32.11     | -0.05074 | 0.322636 | 0.423284 |
| OTX1       | 2p15         | 0.050728 | 0.322731 | 0.423381 |
| R3HDM1     | 2q21.3       | 0.050724 | 0.32277  | 0.423404 |
| PTGR1      | 9q31.3       | -0.05072 | 0.322836 | 0.423463 |
| TBX15      | 1p12         | 0.050694 | 0.323054 | 0.423721 |
| CDC20B     | 5q11.2       | 0.05069  | 0.323099 | 0.423738 |
| TEX55      | 3q13.32      | 0.050688 | 0.323111 | 0.423738 |
| CLDN5      | 22q11.21     | 0.050686 | 0.32313  | 0.423738 |
| C2ORF83    | 2q36.3       | -0.05067 | 0.32325  | 0.423868 |
| STX18      | 4p16.3-p16.2 | -0.05067 | 0.323323 | 0.423911 |
| ZFP28      | 19q13.43     | 0.050666 | 0.323326 | 0.423911 |
| PTPN2      | 18p11.21     | 0.050655 | 0.323435 | 0.424026 |
| TMEM165    | 4q12         | 0.050618 | 0.323787 | 0.42446  |
| OR8G5      | 11q24.2      | -0.0506  | 0.323984 | 0.424691 |
| EFCAB12    | 3q21.3       | 0.050561 | 0.32433  | 0.425117 |
| BSPH1      | 19q13.33     | 0.050557 | 0.324372 | 0.425144 |
| UBXN8      | 8p12         | 0.050548 | 0.324451 | 0.425219 |
| WNT16      | 7q31.31      | -0.05054 | 0.324492 | 0.42523  |
| PMCHL2     | 5q13.2       | -0.05054 | 0.324517 | 0.42523  |
| SCARNA23   | Xp22.11      | -0.05054 | 0.324523 | 0.42523  |
| SULT1A2    | 16p11.2      | -0.05052 | 0.324723 | 0.425456 |
| GSTM2P1    | 6q21         | -0.05052 | 0.324748 | 0.425456 |
| FMR1-AS1   | Xq27.3       | 0.050516 | 0.324759 | 0.425456 |
| POT1       | 7q31.33      | -0.0505  | 0.324905 | 0.425619 |
| MXI1       | 10q25.2      | -0.05048 | 0.325078 | 0.425819 |
| FHL3       | 1p34.3       | -0.05048 | 0.325118 | 0.425842 |
| CCL4       | 17q12        | 0.05044  | 0.325488 | 0.426299 |
| PNCK       | Xq28         | -0.05043 | 0.325561 | 0.426367 |
| RAB9BP1    | 5q21.2-q21.3 | 0.050408 | 0.325803 | 0.426602 |
| LINC00908  | 18q23        | 0.050408 | 0.325803 | 0.426602 |
| EFCC1      | 3q21.3       | 0.050407 | 0.325804 | 0.426602 |
| AQP2       | 12q13.12     | 0.050403 | 0.325844 | 0.426626 |
| MCM10      | 10p13        | -0.0504  | 0.325881 | 0.426646 |
| CCDC166    | 8q24.3       | -0.05039 | 0.325933 | 0.426688 |
| CDKN2B-AS1 | 9p21.3       | 0.050355 | 0.326307 | 0.427149 |
| AP3M2      | 8p11.21      | -0.05035 | 0.326371 | 0.427202 |
| NKAIN2     | 6q22.31      | -0.05035 | 0.32639  | 0.427202 |
| LBP        | 20q11.23     | -0.05034 | 0.326439 | 0.427238 |
| ACTN2      | 1q43         | 0.050339 | 0.32646  | 0.427238 |
| CNMD       | 13q14.3      | 0.050314 | 0.326699 | 0.427523 |
| KPRP       | 1q21.3       | -0.05029 | 0.326931 | 0.427799 |
| DEPTOR     | 8q24.12      | -0.05029 | 0.326978 | 0.427812 |
| HHATL      | 3p22.1       | 0.050285 | 0.326985 | 0.427812 |
| LINC00575  | 4q21.22      | -0.05027 | 0.327124 | 0.427966 |
| SMTN       | 22q12.2      | 0.050254 | 0.327281 | 0.428144 |

|          |          |          |          |          |
|----------|----------|----------|----------|----------|
| PEBP4    | 8p21.3   | 0.050248 | 0.327336 | 0.428178 |
| FBXO9    | 6p12.1   | -0.05025 | 0.32735  | 0.428178 |
| PLA1A    | 3q13.33  | 0.050227 | 0.327538 | 0.428397 |
| CASC1    | 12p12.1  | -0.05022 | 0.327604 | 0.428454 |
| C3ORF84  | 3p21.31  | -0.05022 | 0.327649 | 0.428486 |
| INVS     | 9q31.1   | -0.0502  | 0.327779 | 0.428628 |
| NDUFV2   | 18p11.22 | -0.0502  | 0.327827 | 0.428662 |
| C22ORF42 | 22q12.3  | -0.05017 | 0.328057 | 0.428935 |
| APOC1P1  | 19q13.32 | 0.050171 | 0.328082 | 0.428939 |
| LNX2     | 13q12.2  | 0.050165 | 0.328139 | 0.428986 |
| TES      | 7q31.2   | 0.05013  | 0.328474 | 0.429377 |
| GPR39    | 2q21.2   | -0.05013 | 0.328481 | 0.429377 |
| ZBTB12   | 6p21.33  | -0.05011 | 0.328682 | 0.429611 |
| PHF23    | 17p13.1  | 0.050079 | 0.328971 | 0.429961 |
| WDR54    | 2p13.1   | -0.05007 | 0.329037 | 0.43002  |
| RCHY1    | 4q21.1   | 0.050068 | 0.329081 | 0.430049 |
| ZNF230   | 19q13.31 | 0.050063 | 0.329123 | 0.430076 |
| PKP1     | 1q32.1   | -0.05006 | 0.329169 | 0.430108 |
| PDE6H    | 12p12.3  | 0.050046 | 0.329289 | 0.430237 |
| PTCH1    | 9q22.32  | 0.050044 | 0.329312 | 0.430239 |
| TIMELESS | 12q13.3  | -0.05004 | 0.329389 | 0.430312 |
| KRT3     | 12q13.13 | 0.049999 | 0.329745 | 0.430748 |
| ALDH1B1  | 9p13.1   | -0.04999 | 0.329858 | 0.430868 |
| TMEM154  | 4q31.3   | 0.049983 | 0.329902 | 0.430898 |
| LYL1     | 19p13.13 | 0.049979 | 0.329942 | 0.430921 |
| ANP32C   | 4q32.3   | 0.049974 | 0.329985 | 0.430949 |
| ZNF790   | 19q13.12 | -0.04995 | 0.330237 | 0.431203 |
| OR2M5    | 1q44     | 0.049943 | 0.330287 | 0.431203 |
| OR511    | 11q12.1  | 0.049943 | 0.330287 | 0.431203 |
| OR8B12   | 11q24.2  | 0.049943 | 0.330287 | 0.431203 |
| OR4C16   | 11q11    | 0.049943 | 0.330287 | 0.431203 |
| CDH4     | 20q13.33 | 0.049936 | 0.330355 | 0.431264 |
| TSC1     | 9q34.13  | -0.04992 | 0.330464 | 0.431377 |
| SETD9    | 5q11.2   | -0.0499  | 0.330672 | 0.431622 |
| MRGPRX3  | 11p15.1  | -0.04989 | 0.330791 | 0.431748 |
| HOMER3   | 19p13.11 | -0.04985 | 0.331149 | 0.432187 |
| GAPDH    | 12p13.31 | -0.04984 | 0.331276 | 0.432326 |
| LRAT     | 4q32.1   | 0.049834 | 0.331348 | 0.432391 |
| TACSTD2  | 1p32.1   | 0.049823 | 0.331451 | 0.432497 |
| LAMP2    | Xq24     | -0.04981 | 0.331626 | 0.432691 |
| CSN1S1   | 4q13.3   | -0.0498  | 0.331642 | 0.432691 |
| ABAT     | 16p13.2  | -0.04977 | 0.332    | 0.43313  |
| CLCA3P   | 1p22.3   | 0.049751 | 0.33215  | 0.433296 |
| CD3D     | 11q23.3  | 0.049742 | 0.332237 | 0.433382 |
| PAX8-AS1 | 2q14.1   | -0.04971 | 0.332587 | 0.43381  |
| KANK3    | 19p13.2  | -0.0497  | 0.332629 | 0.433837 |
| ALG2     | 9q22.33  | -0.04969 | 0.332708 | 0.433911 |
| C5       | 9q33.2   | 0.049663 | 0.333007 | 0.434272 |
| KIAA0895 | 7p14.2   | -0.04964 | 0.333258 | 0.434573 |
| HAND1    | 5q33.2   | 0.04962  | 0.333431 | 0.434741 |
| INHA     | 2q35     | -0.04962 | 0.333443 | 0.434741 |
| USP17L9P | 4p16.1   | -0.04962 | 0.333453 | 0.434741 |
| URAD     | 13q12.2  | 0.049602 | 0.333603 | 0.434909 |
| FNDC7    | 1p13.3   | -0.0496  | 0.333656 | 0.434949 |
| SAGE1    | Xq26.3   | -0.04959 | 0.333718 | 0.435002 |
| SNTG1    | 8q11.21  | -0.04958 | 0.333802 | 0.435084 |
| IRX5     | 16q12.2  | -0.04956 | 0.333982 | 0.435289 |
| EDAR     | 2q13     | 0.04956  | 0.334015 | 0.435304 |

|           |                |          |          |          |
|-----------|----------------|----------|----------|----------|
| CDHR1     | 10q23.1        | -0.04955 | 0.334122 | 0.435415 |
| OR6C70    | 12q13.2        | -0.04954 | 0.334174 | 0.435455 |
| GOLGA6A   | 15q24.1        | 0.049539 | 0.334215 | 0.435479 |
| SLC6A6    | 3p25.1         | 0.049535 | 0.334256 | 0.435505 |
| RASIP1    | 19q13.33       | 0.049483 | 0.334766 | 0.436141 |
| LINC01020 | 5p15.32        | 0.049478 | 0.334811 | 0.436171 |
| FOXM1     | 12p13.33       | -0.04945 | 0.335088 | 0.4365   |
| BATF3     | 1q32.3         | -0.04945 | 0.335107 | 0.4365   |
| TRPC2     | 11p15.4        | 0.049446 | 0.33513  | 0.436502 |
| GK3P      | 4q32.3         | 0.049441 | 0.335181 | 0.436539 |
| HYOU1     | 11q23.3        | 0.049434 | 0.335248 | 0.436599 |
| RMST      | 12q23.1 12q21  | 0.049391 | 0.335667 | 0.437115 |
| SRD5A2    | 2p23.1         | -0.04936 | 0.335945 | 0.437449 |
| NFKBIA    | 14q13.2        | 0.049357 | 0.335997 | 0.437488 |
| NOC3L     | 10q23.33       | -0.04934 | 0.336153 | 0.437663 |
| TBCE      | 1q42.3         | -0.04934 | 0.336187 | 0.437679 |
| TAAR6     | 6q23.2         | -0.04932 | 0.336395 | 0.437921 |
| CRNKL1    | 20p11.23       | -0.0493  | 0.336552 | 0.438071 |
| PCBP2     | 12q13.13       | -0.0493  | 0.336554 | 0.438071 |
| SEC61A1   | 3q21.3         | 0.049288 | 0.336679 | 0.438205 |
| EDNRA     | 4q31.22-q31.23 | 0.04928  | 0.336753 | 0.438273 |
| IRF7      | 11p15.5        | -0.04927 | 0.336886 | 0.438418 |
| MYH2      | 17p13.1        | 0.04926  | 0.336955 | 0.438479 |
| CYB5RL    | 1p32.3         | 0.049256 | 0.336996 | 0.438504 |
| DAZ1      | Yq11.223       | 0.049238 | 0.33717  | 0.438702 |
| TBC1D22A  | 22q13.31       | -0.04924 | 0.337197 | 0.438708 |
| ARAP1     | 11q13.4        | 0.049215 | 0.337393 | 0.438927 |
| DNAJB8    | 3q21.3         | -0.04921 | 0.337409 | 0.438927 |
| ULBP1     | 6q25.1         | -0.04919 | 0.337611 | 0.439162 |
| SUPT5H    | 19q13.2        | 0.049189 | 0.337647 | 0.439181 |
| LINC00469 | 17q25.1        | 0.049179 | 0.337749 | 0.439284 |
| ABHD14A   | 3p21.2         | -0.04918 | 0.337783 | 0.4393   |
| CKAP5     | 11p11.2        | 0.049133 | 0.338202 | 0.439817 |
| DCUN1D3   | 16p12.3        | -0.04912 | 0.338319 | 0.43994  |
| ADAM21P1  | 14q24.2        | 0.049108 | 0.338449 | 0.440081 |
| SP9       | 2q31.1         | -0.04909 | 0.338589 | 0.440234 |
| PRDM14    | 8q13.3         | -0.04907 | 0.338798 | 0.440477 |
| SPRR4     | 1q21.3         | -0.04907 | 0.338864 | 0.440534 |
| CES1P1    | 16q12.2        | -0.04906 | 0.338902 | 0.440556 |
| PON2      | 7q21.3         | 0.049031 | 0.339208 | 0.440924 |
| USP2      | 11q23.3        | -0.04899 | 0.339575 | 0.441363 |
| RNF207    | 1p36.31        | -0.04899 | 0.339611 | 0.441363 |
| DPPA5     | 6q13           | -0.04899 | 0.339612 | 0.441363 |
| COL11A2   | 6p21.32        | -0.04897 | 0.339773 | 0.441543 |
| SYCP3     | 12q23.2        | 0.048963 | 0.339879 | 0.441653 |
| RMND5A    | 2p11.2         | 0.048958 | 0.339928 | 0.441688 |
| ZNF300    | 5q33.1         | 0.048948 | 0.340024 | 0.441784 |
| LCE2A     | 1q21.3         | -0.04893 | 0.340206 | 0.44198  |
| NOXA1     | 9q34.3         | -0.04893 | 0.340219 | 0.44198  |
| C1QTNF4   | 11p11.2        | -0.04889 | 0.340591 | 0.442435 |
| TTY18     | Yp11.2         | 0.048881 | 0.340685 | 0.442529 |
| PYGL      | 14q22.1        | 0.048877 | 0.340724 | 0.44255  |
| TSPOAP1   | 17q22          | -0.04887 | 0.340836 | 0.442667 |
| LAMTOR3   | 4q23           | -0.04886 | 0.340877 | 0.442691 |
| TSGA13    | 7q32.2         | -0.04885 | 0.340955 | 0.442764 |
| DKK4      | 8p11.21        | -0.04883 | 0.341166 | 0.44301  |
| SPAG16    | 2q34           | -0.04881 | 0.341358 | 0.44323  |
| AACSP1    | 5q35.3         | -0.04881 | 0.34138  | 0.44323  |

|             |              |          |          |          |
|-------------|--------------|----------|----------|----------|
| ZNF224      | 19q13.31     | 0.048786 | 0.341627 | 0.443522 |
| MCHR2       | 6q16.2       | 0.04877  | 0.341783 | 0.443696 |
| HULC        | 6p24.3       | -0.04877 | 0.341823 | 0.443718 |
| A2ML1       | 12p13.31     | -0.04874 | 0.342042 | 0.443974 |
| PMCHL1      | 5p14.3       | -0.04873 | 0.342164 | 0.444103 |
| SSTR4       | 20p11.21     | 0.048722 | 0.342261 | 0.4442   |
| CD7         | 17q25.3      | 0.048671 | 0.342769 | 0.444832 |
| PRKAG3      | 2q35         | 0.048666 | 0.342819 | 0.444868 |
| OR2A9P      | 7q35         | 0.048655 | 0.342923 | 0.444974 |
| DGAT2L6     | Xq13.1       | -0.04865 | 0.342949 | 0.444978 |
| DGKG        | 3q27.2-q27.3 | -0.04864 | 0.343061 | 0.445095 |
| GON7        | 14q32.12     | -0.04864 | 0.343122 | 0.445145 |
| ZNF549      | 19q13.43     | 0.048608 | 0.343392 | 0.445466 |
| CRTC2       | 1q21.3       | 0.048589 | 0.343578 | 0.445679 |
| CELA3B      | 1p36.12      | -0.04858 | 0.343639 | 0.445718 |
| OR52N2      | 11p15.4      | 0.048582 | 0.343652 | 0.445718 |
| LYSMD2      | 15q21.2      | 0.048577 | 0.343706 | 0.445759 |
| UNCX        | 7p22.3       | 0.048573 | 0.343744 | 0.445779 |
| BCORL1      | Xq26.1       | 0.048565 | 0.343818 | 0.445845 |
| KPNA2       | 17q24.2      | -0.04854 | 0.344055 | 0.446125 |
| IFIT3       | 10q23.31     | 0.048498 | 0.344491 | 0.44666  |
| C10ORF90    | 10q26.2      | 0.048486 | 0.344603 | 0.446778 |
| BPGM        | 7q33         | 0.048481 | 0.344654 | 0.446814 |
| DEPDC1      | 1p31.3       | 0.048473 | 0.344739 | 0.446896 |
| PRTN3       | 19p13.3      | 0.048463 | 0.344837 | 0.446993 |
| RNU12-2P    | Xp11.3       | 0.048447 | 0.344993 | 0.447167 |
| FBXO48      | 2p13.3       | 0.048431 | 0.345157 | 0.44735  |
| LIPF        | 10q23.31     | 0.048428 | 0.345183 | 0.447355 |
| GDI2        | 10p15.1      | 0.048425 | 0.345216 | 0.447369 |
| SCAI        | 9q33.3       | -0.04842 | 0.345253 | 0.447388 |
| CALCA       | 11p15.2      | -0.04842 | 0.345284 | 0.447399 |
| CXCL9       | 4q21.1       | 0.048409 | 0.345377 | 0.447491 |
| SKAP1       | 17q21.32     | 0.048404 | 0.345428 | 0.447528 |
| PCDHB17P    | 5q31.3       | 0.048387 | 0.345599 | 0.447699 |
| TFAP2A      | 6p24.3       | 0.048383 | 0.34563  | 0.447699 |
| MT1E        | 16q13        | 0.048383 | 0.345635 | 0.447699 |
| SOX4        | 6p22.3       | 0.048382 | 0.34565  | 0.447699 |
| FER1L5      | 2q11.2       | -0.04838 | 0.345672 | 0.447699 |
| SNORD115-13 | 15q11.2      | -0.04835 | 0.345916 | 0.447986 |
| FBXO45      | 3q29         | -0.04835 | 0.345957 | 0.44801  |
| SPATA6L     | 9p24.2-p24.1 | -0.04833 | 0.346135 | 0.448212 |
| GMPPB       | 3p21.31      | 0.048324 | 0.346219 | 0.448292 |
| SPEG        | 2q35         | 0.048306 | 0.346404 | 0.448482 |
| MAEA        | 4p16.3       | -0.04831 | 0.346411 | 0.448482 |
| ALKBH8      | 11q22.3      | 0.048297 | 0.346495 | 0.448562 |
| MYOG        | 1q32.1       | -0.04829 | 0.346613 | 0.448686 |
| PLXNA1      | 3q21.3       | 0.04827  | 0.346764 | 0.448839 |
| HNF4A       | 20q13.12     | -0.04827 | 0.346792 | 0.448839 |
| ZNF324B     | 19q13.43     | 0.048267 | 0.346798 | 0.448839 |
| DGKE        | 17q22        | -0.04826 | 0.346874 | 0.448907 |
| NSUN4       | 1p33         | 0.048255 | 0.346912 | 0.448928 |
| CNBD1       | 8q21.3       | -0.04825 | 0.346992 | 0.449003 |
| ADIPOQ      | 3q27.3       | 0.048236 | 0.347107 | 0.449122 |
| LCNL1       | 9q34.3       | -0.04823 | 0.347203 | 0.449205 |
| NUMBL       | 19q13.2      | 0.048225 | 0.347216 | 0.449205 |
| ANO2        | 12p13.31     | 0.048219 | 0.347275 | 0.449253 |
| SPRR2F      | 1q21.3       | -0.04821 | 0.34739  | 0.449347 |
| KANSL3      | 2q11.2       | -0.04821 | 0.347393 | 0.449347 |

|              |          |          |          |          |
|--------------|----------|----------|----------|----------|
| LRIT1        | 10q23.1  | 0.04819  | 0.347562 | 0.449536 |
| TBC1D16      | 17q25.3  | -0.04817 | 0.347731 | 0.449727 |
| LGALS3       | 14q22.3  | 0.048156 | 0.347906 | 0.449924 |
| CACNA1F      | Xp11.23  | 0.048141 | 0.348057 | 0.45009  |
| AK1          | 9q34.11  | -0.04814 | 0.34809  | 0.450103 |
| RNF217       | 6q22.31  | 0.048129 | 0.348172 | 0.45018  |
| EFNA2        | 19p13.3  | -0.04812 | 0.348267 | 0.45025  |
| DACH2        | Xq21.2   | 0.048119 | 0.348271 | 0.45025  |
| LINC01777    | 1p36.32  | -0.0481  | 0.348423 | 0.450418 |
| KRT31        | 17q21.2  | -0.04809 | 0.348569 | 0.450577 |
| OR4D11       | 11q12.1  | 0.048085 | 0.34862  | 0.450615 |
| STAT5B       | 17q21.2  | 0.048082 | 0.348651 | 0.450625 |
| C16ORF86     | 16q22.1  | -0.04806 | 0.348874 | 0.450864 |
| FBXW12       | 3p21.31  | -0.04806 | 0.348881 | 0.450864 |
| TBPL2        | 14q22.3  | 0.048029 | 0.349183 | 0.4512   |
| LMF1         | 16p13.3  | -0.04803 | 0.349186 | 0.4512   |
| PRB4         | 12p13.2  | 0.04801  | 0.349368 | 0.451406 |
| RAPGEF4      | 2q31.1   | -0.04797 | 0.349724 | 0.451813 |
| ERBB2        | 17q12    | 0.047974 | 0.349728 | 0.451813 |
| GPR151       | 5q32     | -0.04797 | 0.349785 | 0.451857 |
| HARS2        | 5q31.3   | -0.04796 | 0.34989  | 0.451964 |
| CYP26C1      | 10q23.33 | 0.047955 | 0.34992  | 0.451974 |
| RILPL2       | 12q24.31 | 0.047948 | 0.349996 | 0.452043 |
| CSNK1A1P1    | 15q14    | 0.047906 | 0.350413 | 0.452552 |
| OTUD6A       | Xq13.1   | -0.04789 | 0.350564 | 0.452717 |
| NADK         | 1p36.33  | -0.04787 | 0.350729 | 0.452902 |
| PHRF1        | 11p15.5  | -0.04787 | 0.350768 | 0.452923 |
| PXDC1        | 6p25.2   | 0.047861 | 0.350866 | 0.45302  |
| SYCP1        | 1p13.2   | -0.04786 | 0.350927 | 0.453059 |
| SLC1A7       | 1p32.3   | -0.04785 | 0.350942 | 0.453059 |
| DUSP12       | 1q23.3   | -0.04785 | 0.351013 | 0.453122 |
| CST9         | 20p11.21 | -0.04781 | 0.351397 | 0.453589 |
| PACRG        | 6q26     | -0.0478  | 0.351458 | 0.453638 |
| APH1A        | 1q21.2   | 0.04779  | 0.351584 | 0.453772 |
| ATG12        | 5q22.3   | 0.04778  | 0.351691 | 0.453873 |
| NF2          | 22q12.2  | -0.04778 | 0.351714 | 0.453873 |
| FKSG29       | 13q32.3  | 0.047774 | 0.351745 | 0.453873 |
| RIPOR3       | 20q13.13 | -0.04777 | 0.351754 | 0.453873 |
| TCERG1       | 5q32     | -0.04776 | 0.351897 | 0.454029 |
| ZNF330       | 4q31.21  | -0.04775 | 0.35201  | 0.454146 |
| GAGE2D       | Xp11.23  | -0.04774 | 0.352048 | 0.454166 |
| IGFBP7       | 4q12     | 0.047738 | 0.352112 | 0.454219 |
| HCP5         | 6p21.33  | -0.04772 | 0.35226  | 0.454381 |
| ZMYND8       | 20q13.12 | -0.04771 | 0.352384 | 0.454496 |
| RAG1         | 11p12    | 0.04771  | 0.352395 | 0.454496 |
| CLEC3A       | 16q23.1  | -0.0477  | 0.352504 | 0.454607 |
| NXNL1        | 19p13.11 | 0.047692 | 0.352579 | 0.454675 |
| KCNH7        | 2q24.2   | 0.047672 | 0.352776 | 0.454876 |
| CT47A2       | Xq24     | -0.04767 | 0.35278  | 0.454876 |
| PHGR1        | 15q15.1  | -0.04767 | 0.352834 | 0.454916 |
| PSMD5        | 9q33.2   | 0.047663 | 0.352867 | 0.454929 |
| LOC100128573 | 19p13.2  | -0.04766 | 0.352948 | 0.455005 |
| ST13P4       | 13q14.2  | 0.047651 | 0.352991 | 0.455031 |
| LPCAT2       | 16q12.2  | -0.04764 | 0.353067 | 0.455099 |
| PKD1         | 16p13.3  | 0.047636 | 0.353139 | 0.455163 |
| ANKLE2       | 12q24.33 | 0.047628 | 0.353222 | 0.45524  |
| ATG2A        | 11q13.1  | -0.04762 | 0.353272 | 0.455275 |
| CPA5         | 7q32.2   | -0.04758 | 0.35375  | 0.455837 |

|             |               |          |          |          |
|-------------|---------------|----------|----------|----------|
| OR10V1      | 11q12.1       | 0.047576 | 0.353754 | 0.455837 |
| LINC00200   | 10p15.3       | 0.04752  | 0.354318 | 0.456515 |
| ITPK1       | 14q32.12      | 0.047519 | 0.354325 | 0.456515 |
| CTDSP1      | 2q35          | -0.04746 | 0.354939 | 0.457277 |
| RARS        | 5q34          | -0.04745 | 0.355055 | 0.457396 |
| C20ORF204   | 20q13.33      | -0.04744 | 0.355128 | 0.457461 |
| SNORA5B     | 7p13          | 0.047426 | 0.355274 | 0.45762  |
| PPP6R3      | 11q13.2       | 0.047417 | 0.355357 | 0.457693 |
| BCL2L14     | 12p13.2       | 0.047416 | 0.355376 | 0.457693 |
| CASP14      | 19p13.12      | -0.04741 | 0.355447 | 0.457754 |
| LINC00346   | 13q34         | 0.047406 | 0.355474 | 0.457759 |
| STARD13     | 13q13.1-q13.2 | 0.047404 | 0.355499 | 0.457762 |
| DMGDH       | 5q14.1        | -0.04739 | 0.355657 | 0.457934 |
| IRAK4       | 12q12         | -0.04739 | 0.355678 | 0.457934 |
| IGFN1       | 1q32.1        | -0.04738 | 0.35572  | 0.457959 |
| SPRR1A      | 1q21.3        | 0.047378 | 0.355758 | 0.457979 |
| PDILT       | 16p12.3       | 0.047371 | 0.355832 | 0.458036 |
| MAPK8IP1    | 11p11.2       | -0.04737 | 0.355849 | 0.458036 |
| BAMBI       | 10p12.1       | -0.04737 | 0.355886 | 0.458055 |
| NFATC2IP    | 16p11.2       | 0.047362 | 0.355917 | 0.458065 |
| SHISA9      | 16p13.12      | 0.047358 | 0.355961 | 0.458092 |
| SNAR-G1     | 19q13.33      | -0.04732 | 0.356304 | 0.458504 |
| AGPAT1      | 6p21.32       | 0.047306 | 0.356495 | 0.45872  |
| ITLN2       | 1q23.3        | 0.047279 | 0.356769 | 0.459044 |
| RTP5        | 2q37.3        | 0.047244 | 0.357124 | 0.459462 |
| FGFBP3      | 10q23.32      | 0.04724  | 0.357163 | 0.459462 |
| BDNF-AS     | 11p14.1       | -0.04724 | 0.357163 | 0.459462 |
| CACNG3      | 16p12.1       | -0.04722 | 0.357361 | 0.459687 |
| CYP2A13     | 19q13.2       | -0.04722 | 0.357393 | 0.459694 |
| LINC00964   | 8q24.13       | 0.047215 | 0.357412 | 0.459694 |
| OR4C6       | 11q11         | -0.0472  | 0.357549 | 0.459841 |
| KRTAP10-10  | 21q22.3       | -0.04719 | 0.357635 | 0.459922 |
| FAM3C       | 7q31.31       | 0.047181 | 0.35776  | 0.460053 |
| C19ORF38    | 19p13.2       | 0.047175 | 0.357822 | 0.460103 |
| PCDHGA7     | 5q31.3        | 0.047162 | 0.357962 | 0.460253 |
| KRTAP19-3   | 21q22.11      | -0.04716 | 0.358024 | 0.4603   |
| SNORD115-26 | 15q11.2       | -0.04715 | 0.358049 | 0.4603   |
| BCRP3       | 22q11.23      | -0.04715 | 0.358068 | 0.4603   |
| CYP20A1     | 2q33.2        | -0.04714 | 0.358167 | 0.460389 |
| TEX2        | 17q23.3       | 0.04714  | 0.358182 | 0.460389 |
| DAZ3        | Yq11.23       | 0.047128 | 0.358307 | 0.46052  |
| HOXA11      | 7p15.2        | -0.04712 | 0.358404 | 0.460615 |
| LINC00839   | 10q11.21      | -0.04711 | 0.358527 | 0.460743 |
| DLGAP3      | 1p34.3        | -0.0471  | 0.35856  | 0.460756 |
| MIR7-3HG    | 19p13.3       | -0.04709 | 0.358723 | 0.460936 |
| ZNF808      | 19q13.41      | 0.047082 | 0.358777 | 0.460975 |
| SLC29A1     | 6p21.1        | -0.04707 | 0.358925 | 0.461137 |
| HTR1D       | 1p36.12       | -0.04706 | 0.359005 | 0.461185 |
| EXOC2       | 6p25.3        | 0.047059 | 0.359009 | 0.461185 |
| NUP160      | 11p11.2       | 0.04705  | 0.359099 | 0.461271 |
| FAM86FP     | 12p13.31      | -0.04702 | 0.359434 | 0.461672 |
| ATP11A      | 13q34         | -0.04698 | 0.359861 | 0.462191 |
| RAB32       | 6q24.3        | -0.04697 | 0.359894 | 0.462204 |
| C1ORF162    | 1p13.2        | 0.046965 | 0.359972 | 0.462273 |
| TACR3       | 4q24          | 0.046953 | 0.360089 | 0.462395 |
| HOMER1      | 5q14.1        | -0.04695 | 0.360159 | 0.462455 |
| ABCA5       | 17q24.3       | 0.04694  | 0.360232 | 0.462518 |
| SQLE        | 8q24.13       | -0.04694 | 0.360271 | 0.462529 |



|           |                 |          |          |          |
|-----------|-----------------|----------|----------|----------|
| KLHL36    | 16q24.1         | 0.046934 | 0.360289 | 0.462529 |
| GALNTL5   | 7q36.1          | -0.04693 | 0.360309 | 0.462529 |
| CELA2B    | 1p36.21         | 0.046888 | 0.36076  | 0.463078 |
| RNF186    | 1p36.13         | 0.046848 | 0.361168 | 0.463571 |
| OR1D2     | 17p13.3         | 0.046846 | 0.361192 | 0.463573 |
| DLD       | 7q31.1          | 0.046816 | 0.361503 | 0.463943 |
| TAS2R50   | 12p13.2         | -0.0468  | 0.361654 | 0.464097 |
| PPP1R1C   | 2q31.3-q32.1    | 0.046799 | 0.36167  | 0.464097 |
| OR2K2     | 9q31.3          | -0.04679 | 0.361772 | 0.464198 |
| OR5AU1    | 14q11.2         | 0.046776 | 0.361911 | 0.464347 |
| GLB1L3    | 11q25           | 0.046765 | 0.362022 | 0.46446  |
| DYTN      | 2q33.3          | -0.04674 | 0.362331 | 0.464826 |
| GEMIN5    | 5q33.2          | -0.04672 | 0.362499 | 0.465012 |
| TNFRSF18  | 1p36.33         | -0.04671 | 0.362552 | 0.46505  |
| ST6GAL1   | 3q27.3          | 0.046711 | 0.362583 | 0.46506  |
| NPNT      | 4q24            | 0.046707 | 0.362618 | 0.465063 |
| BCAT2     | 19q13.33        | -0.04671 | 0.362632 | 0.465063 |
| UQCRRS1   | 19q12           | -0.0467  | 0.362685 | 0.465102 |
| OR52E8    | 11p15.4         | -0.04669 | 0.362785 | 0.46517  |
| KRTAP19-1 | 21q22.11        | -0.04669 | 0.362785 | 0.46517  |
| BIRC8     | 19q13.42        | -0.04665 | 0.363176 | 0.465642 |
| SF1       | 11q13.1         | -0.04661 | 0.363609 | 0.466167 |
| RPL3L     | 16p13.3         | 0.046602 | 0.363705 | 0.466261 |
| BMS1P2    | 10q11.22        | -0.04659 | 0.363791 | 0.466341 |
| KSR1      | 17q11.2         | 0.046581 | 0.363918 | 0.466468 |
| RAB37     | 17q25.1         | 0.046578 | 0.363944 | 0.466468 |
| BTN3A1    | 6p22.2          | 0.046577 | 0.36396  | 0.466468 |
| ING3      | 7q31.31         | 0.046574 | 0.363991 | 0.466478 |
| CATSPERD  | 19p13.3         | -0.04653 | 0.364442 | 0.467026 |
| SLC35G1   | 10q23.33        | -0.04652 | 0.364499 | 0.467043 |
| EGFL6     | Xp22.2          | -0.04652 | 0.364502 | 0.467043 |
| MCFD2     | 2p21            | 0.046521 | 0.364533 | 0.467052 |
| PSTPIP2   | 18q21.1 tdb7990 | -0.04652 | 0.364575 | 0.467077 |
| SCARNA4   | 1q22            | -0.04651 | 0.364602 | 0.467081 |
| PDLIM2    | 8p21.3          | 0.046491 | 0.364849 | 0.467368 |
| C16ORF90  | 16p13.3         | 0.046479 | 0.364969 | 0.467464 |
| TMA16     | 4q32.2          | -0.04648 | 0.364971 | 0.467464 |
| C1QL2     | 2q14.2          | 0.046463 | 0.365133 | 0.467642 |
| FMO1      | 1q24.3          | 0.046454 | 0.365232 | 0.467739 |
| SCNN1G    | 16p12.2         | 0.046407 | 0.365719 | 0.468332 |
| WDR73     | 15q25.2         | -0.04637 | 0.366059 | 0.468738 |
| C2CD2     | 21q22.3         | 0.046369 | 0.366103 | 0.468765 |
| GPR32     | 19q13.33        | -0.04633 | 0.366497 | 0.469239 |
| DNAJB7    | 22q13.2         | -0.04632 | 0.366656 | 0.469397 |
| KLHL32    | 6q16.1          | 0.046315 | 0.366667 | 0.469397 |
| PGM5P2    | 9p11.2          | 0.04631  | 0.366716 | 0.469424 |
| TMEM251   | 14q32.12        | 0.046307 | 0.36675  | 0.469424 |
| TPTE2     | 13q12.11        | 0.046306 | 0.366759 | 0.469424 |
| ZNF331    | 19q13.42        | 0.046303 | 0.366788 | 0.469431 |
| RHOXF2B   | Xq24            | -0.04629 | 0.366931 | 0.469585 |
| NMI       | 2q23.3          | -0.04629 | 0.36696  | 0.469591 |
| CASP5     | 11q22.3         | 0.046275 | 0.36708  | 0.469715 |
| PART1     | 5q12.1          | -0.04627 | 0.367117 | 0.469732 |
| CCND3     | 6p21.1          | -0.04623 | 0.367596 | 0.470315 |
| GSTT2     | 22q11.23        | -0.04622 | 0.367645 | 0.470348 |
| RBM41     | Xq22.3          | 0.046217 | 0.367679 | 0.470362 |
| MNS1      | 15q21.3         | 0.046211 | 0.367748 | 0.470419 |
| SPDYE5    | 7q11.23         | -0.04621 | 0.367789 | 0.470442 |

|           |          |          |          |          |
|-----------|----------|----------|----------|----------|
| STON2     | 14q31.1  | 0.046175 | 0.368119 | 0.470833 |
| SLC25A25  | 9q34.11  | -0.04617 | 0.368199 | 0.470906 |
| ASPRV1    | 2p13.3   | 0.046161 | 0.368262 | 0.470956 |
| UBQLN4    | 1q22     | 0.046143 | 0.368449 | 0.471166 |
| LOC401127 | 4p14     | -0.04612 | 0.368693 | 0.471433 |
| SNORA80A  | 21q22.11 | -0.04612 | 0.368705 | 0.471433 |
| PTPN1     | 20q13.13 | -0.04611 | 0.368834 | 0.471568 |
| TPGS2     | 18q12.2  | 0.04609  | 0.369002 | 0.471753 |
| KLK2      | 19q13.33 | -0.04608 | 0.369114 | 0.471865 |
| DNAJC1    | 10p12.31 | -0.04603 | 0.369602 | 0.47246  |
| CTXN3     | 5q23.2   | 0.045991 | 0.370029 | 0.472975 |
| OR2M3     | 1q44     | -0.04597 | 0.370294 | 0.473275 |
| DEFB1     | 8p23.1   | -0.04596 | 0.370353 | 0.473275 |
| TRABD2A   | 2p11.2   | -0.04596 | 0.370356 | 0.473275 |
| RADX      | Xq22.3   | -0.04596 | 0.370358 | 0.473275 |
| TRIM4     | 7q22.1   | 0.045945 | 0.370515 | 0.473445 |
| ATP23     | 12q14.1  | -0.04593 | 0.37063  | 0.473561 |
| FAM238A   | 10p12.1  | 0.04593  | 0.370663 | 0.473573 |
| IDI2-AS1  | 10p15.3  | -0.04592 | 0.370755 | 0.473661 |
| LINC00887 | 3q29     | -0.04591 | 0.370837 | 0.473736 |
| ADAMTS20  | 12q12    | 0.045857 | 0.371434 | 0.474468 |
| MPV17L    | 16p13.11 | -0.04584 | 0.371599 | 0.474649 |
| TRIM60    | 4q32.3   | -0.04582 | 0.371867 | 0.47496  |
| OASL      | 12q24.31 | 0.045797 | 0.372051 | 0.475162 |
| ZMYM2     | 13q12.11 | 0.045795 | 0.372073 | 0.475162 |
| GATAD2A   | 19p13.11 | -0.04577 | 0.372381 | 0.475501 |
| ICA1L     | 2q33.2   | -0.04577 | 0.372385 | 0.475501 |
| OR4M1     | 14q11.2  | 0.045762 | 0.372424 | 0.475521 |
| NANS      | 9q22.33  | -0.04575 | 0.372498 | 0.475584 |
| CHFR      | 12q24.33 | 0.045737 | 0.37268  | 0.475787 |
| EIF4A1    | 17p13.1  | 0.045728 | 0.372775 | 0.475877 |
| REV1      | 2q11.2   | 0.045712 | 0.372948 | 0.476069 |
| CYP4X1    | 1p33 1   | -0.04569 | 0.373129 | 0.476268 |
| VNN3      | 6q23.2   | 0.045688 | 0.373201 | 0.476318 |
| MYL3      | 3p21.31  | -0.04569 | 0.373215 | 0.476318 |
| GAGE10    | Xp11.23  | -0.04566 | 0.373472 | 0.476616 |
| CACNA2D4  | 12p13.33 | -0.04564 | 0.373703 | 0.476879 |
| C11ORF65  | 11q22.3  | -0.04562 | 0.373869 | 0.477062 |
| TTLL8     | 22q13.33 | 0.045616 | 0.373948 | 0.477131 |
| EID2B     | 19q13.2  | -0.04561 | 0.373995 | 0.477161 |
| GOT1L1    | 8p11.23  | -0.04561 | 0.374064 | 0.477219 |
| CCL27     | 9p13.3   | -0.0456  | 0.374143 | 0.47729  |
| ZIC3      | Xq26.3   | 0.045593 | 0.374193 | 0.477323 |
| LINC00691 | 3p24.2   | -0.04558 | 0.374303 | 0.477433 |
| PCDHB15   | 5q31.3   | 0.045576 | 0.374368 | 0.477484 |
| TIPIN     | 15q22.31 | 0.045567 | 0.374462 | 0.477575 |
| VWA3A     | 16p12.2  | -0.04556 | 0.374542 | 0.477645 |
| C2CD2L    | 11q23.3  | -0.04553 | 0.374896 | 0.478051 |
| COLQ      | 3p25.1   | -0.04552 | 0.374908 | 0.478051 |
| SLC9B2    | 4q24     | -0.04552 | 0.374951 | 0.478076 |
| CFAP97D1  | 17q21.31 | 0.045508 | 0.375082 | 0.478208 |
| DNMBP-AS1 | 10q24.2  | -0.04551 | 0.375102 | 0.478208 |
| TNK2      | 3q29     | -0.04547 | 0.375464 | 0.478639 |
| ARHGEF38  | 4q24     | 0.045451 | 0.375686 | 0.478891 |
| COQ6      | 14q24.3  | -0.04542 | 0.375994 | 0.479253 |
| GPC3      | Xq26.2   | -0.04541 | 0.376136 | 0.479405 |
| ANP32D    | 12q13.11 | 0.045404 | 0.376174 | 0.479422 |
| DSCR4     | 21q22.13 | -0.0454  | 0.376239 | 0.479475 |

|           |                 |          |          |          |
|-----------|-----------------|----------|----------|----------|
| EWSAT1    | 15q23           | -0.04539 | 0.376327 | 0.479556 |
| CYP4Z2P   | 1p33            | -0.04538 | 0.376408 | 0.479629 |
| KRTDAP    | 19q13.12        | -0.04538 | 0.376445 | 0.479646 |
| DLL4      | 15q15.1         | 0.045373 | 0.376501 | 0.47966  |
| PLIN1     | 15q26.1         | 0.045373 | 0.376505 | 0.47966  |
| ZNF501    | 3p21.31         | 0.04537  | 0.376538 | 0.479672 |
| LRFN1     | 19q13.2         | -0.04536 | 0.376596 | 0.479716 |
| CXORF38   | Xp11.4          | 0.045353 | 0.376719 | 0.479842 |
| ZNF512    | 2p23.3          | 0.04531  | 0.377173 | 0.480389 |
| XKR3      | 22q11.1         | 0.045302 | 0.377251 | 0.480459 |
| MAU2      | 19p13.11        | 0.045296 | 0.377311 | 0.480504 |
| BRD7P3    | 6q22.31         | -0.04529 | 0.377348 | 0.480521 |
| SLC22A10  | 11q12.3         | -0.04527 | 0.377546 | 0.480742 |
| N6AMT1    | 21q21.3         | -0.04524 | 0.377906 | 0.48117  |
| IFNG      | 12q15           | -0.04524 | 0.377937 | 0.481179 |
| KRT74     | 12q13.13        | -0.04523 | 0.378021 | 0.481256 |
| RBP7      | 1p36.22         | -0.0452  | 0.378359 | 0.481655 |
| CAVIN4    | 9q31.1          | 0.045191 | 0.378423 | 0.481706 |
| DUX4L6    | 4q35.2          | 0.045188 | 0.378459 | 0.481721 |
| LINC01551 | 14q12           | -0.04518 | 0.378491 | 0.481731 |
| KRT33B    | 17q21.2         | 0.045181 | 0.378526 | 0.481745 |
| RPL10L    | 14q21.2         | 0.045172 | 0.378619 | 0.481832 |
| ARSA      | 22q13.33        | -0.04516 | 0.378699 | 0.481885 |
| TADA1     | 1q24.1          | 0.045164 | 0.378708 | 0.481885 |
| FBXO16    | 8p21.1          | 0.045158 | 0.378768 | 0.481931 |
| HERC5     | 4q22.1          | -0.04514 | 0.37894  | 0.482119 |
| RXRA      | 9q34.2          | -0.04514 | 0.378979 | 0.482138 |
| ZNF652    | 17q21.32-q21.33 | 0.045125 | 0.379118 | 0.482284 |
| ERICH6B   | 13q14.13        | 0.045121 | 0.379163 | 0.482311 |
| TRIM55    | 8q13.1          | 0.045092 | 0.37947  | 0.48267  |
| C1ORF54   | 1q21.2          | 0.045073 | 0.379675 | 0.4829   |
| PATL2     | 15q21.1         | 0.045052 | 0.379894 | 0.483149 |
| TXLNG     | Xp22.2          | 0.045043 | 0.379984 | 0.483232 |
| EVPL      | 17q25.1         | 0.045028 | 0.380148 | 0.48341  |
| SERPIND1  | 22q11.21        | -0.04501 | 0.380307 | 0.483582 |
| FAM9B     | Xp22.31         | -0.04498 | 0.380608 | 0.483932 |
| LZTFL1    | 3p21.31         | -0.04498 | 0.380631 | 0.483932 |
| IKBKE     | 1q32.1          | 0.044967 | 0.380789 | 0.484102 |
| PPIL3     | 2q33.1          | -0.04496 | 0.380873 | 0.484178 |
| C5ORF64   | 5q12.1          | -0.04495 | 0.380926 | 0.484215 |
| NEU2      | 2q37.1          | 0.04495  | 0.380978 | 0.484228 |
| DNAJC28   | 21q22.11        | 0.044949 | 0.380985 | 0.484228 |
| GJA3      | 13q12.11        | 0.044942 | 0.381057 | 0.484289 |
| NPSR1     | 7p14.3          | 0.044926 | 0.381224 | 0.48447  |
| NXF2      | Xq22.1          | -0.04492 | 0.38133  | 0.484574 |
| OTOP1     | 4p16.3          | -0.0449  | 0.381523 | 0.484789 |
| PITX3     | 10q24.32        | 0.044884 | 0.381674 | 0.48495  |
| TMEM44    | 3q29            | -0.04486 | 0.381922 | 0.485198 |
| SNORA44   | 1p35.3          | -0.04486 | 0.381941 | 0.485198 |
| GMNC      | 3q28            | 0.044857 | 0.381961 | 0.485198 |
| DONSON    | 21q22.11        | -0.04486 | 0.381974 | 0.485198 |
| ENSA      | 1q21.3          | -0.04485 | 0.38199  | 0.485198 |
| MTHFD1    | 14q23.3         | 0.044846 | 0.382075 | 0.485275 |
| SLC66A3   | 2p25.1          | 0.044838 | 0.38216  | 0.485352 |
| GRIN3B    | 19p13.3         | -0.04481 | 0.38242  | 0.485651 |
| GRB10     | 7p12.1          | -0.0448  | 0.382565 | 0.485805 |
| CHADL     | 22q13.2         | -0.0448  | 0.382604 | 0.485823 |
| SNX16     | 8q21.13         | 0.044772 | 0.382869 | 0.48613  |

|           |          |          |          |          |
|-----------|----------|----------|----------|----------|
| WT1       | 11p13    | -0.04477 | 0.382913 | 0.486144 |
| YBEY      | 21q22.3  | -0.04476 | 0.38294  | 0.486144 |
| FAM209B   | 20q13.31 | -0.04476 | 0.382992 | 0.486144 |
| OR4D1     | 17q22    | 0.04476  | 0.382997 | 0.486144 |
| ZNF613    | 19q13.41 | 0.044759 | 0.383002 | 0.486144 |
| TBC1D10C  | 11q13.2  | 0.044739 | 0.383213 | 0.486368 |
| OR5AR1    | 11q12.1  | -0.04474 | 0.383227 | 0.486368 |
| OR6W1P    | 7q34     | -0.04473 | 0.383265 | 0.486385 |
| SERPINE3  | 13q14.3  | -0.04472 | 0.383406 | 0.486533 |
| ODF3B     | 22q13.33 | -0.04471 | 0.383483 | 0.486601 |
| FBXL20    | 17q12    | -0.04471 | 0.38352  | 0.486616 |
| HSD17B4   | 5q23.1   | 0.044703 | 0.383596 | 0.486668 |
| CIP2A     | 3q13.13  | 0.044702 | 0.383609 | 0.486668 |
| CNTNAP4   | 16q23.1  | -0.0447  | 0.383641 | 0.486678 |
| C15ORF32  | 15q26.1  | 0.044694 | 0.383693 | 0.486707 |
| ZNF12     | 7p22.1   | -0.04469 | 0.383713 | 0.486707 |
| RAB11FIP4 | 17q11.2  | -0.04469 | 0.383772 | 0.486734 |
| PP12613   | 4q27     | 0.044686 | 0.383783 | 0.486734 |
| CCK       | 3p22.1   | 0.04467  | 0.383945 | 0.48691  |
| RPL39L    | 3q27.3   | -0.04466 | 0.384036 | 0.486993 |
| CCDC197   | 14q32.12 | 0.04464  | 0.38427  | 0.487259 |
| ICAM3     | 19p13.2  | 0.04463  | 0.384376 | 0.487362 |
| ZNF703    | 8p11.23  | -0.04462 | 0.384474 | 0.487457 |
| HSPA14    | 10p13    | -0.04462 | 0.38452  | 0.487484 |
| C6ORF223  | 6p21.1   | -0.04461 | 0.384564 | 0.487509 |
| S100B     | 21q22.3  | 0.044545 | 0.385281 | 0.488386 |
| PRDX3     | 10q26.11 | -0.04454 | 0.385389 | 0.488492 |
| TFPI2     | 7q21.3   | 0.044516 | 0.385593 | 0.48872  |
| FUT8-AS1  | 14q23.3  | 0.044506 | 0.385704 | 0.48883  |
| ZIC5      | 13q32.3  | 0.044503 | 0.385737 | 0.488841 |
| APOD      | 3q29     | 0.044499 | 0.385777 | 0.488861 |
| MLLT10    | 10p12.31 | 0.044476 | 0.386026 | 0.489145 |
| EHD1      | 11q13.1  | -0.04447 | 0.386086 | 0.48919  |
| AKR1B1    | 7q33     | 0.044459 | 0.386208 | 0.489314 |
| IGFL4     | 19q13.32 | -0.04444 | 0.386395 | 0.48952  |
| NRDC      | 1p32.3   | 0.044428 | 0.386532 | 0.489663 |
| FRMD7     | Xq26.2   | 0.044425 | 0.386564 | 0.489672 |
| TPPP2     | 14q11.2  | -0.04441 | 0.386685 | 0.489795 |
| GOLT1B    | 12p12.1  | 0.04438  | 0.387044 | 0.490218 |
| OR4C45    | 11p11.12 | -0.04437 | 0.387177 | 0.490356 |
| RRAD      | 16q22.1  | -0.04435 | 0.387346 | 0.490539 |
| NIPSNAP3A | 9q31.1   | -0.04433 | 0.38763  | 0.490867 |
| COL27A1   | 9q32     | -0.04431 | 0.387773 | 0.491012 |
| NROB1     | Xp21.2   | 0.04431  | 0.387793 | 0.491012 |
| TREX1     | 3p21.31  | -0.04431 | 0.387844 | 0.491039 |
| FBXL21P   | 5q31.1   | -0.0443  | 0.38787  | 0.491039 |
| FAM234B   | 12p13.1  | -0.0443  | 0.387888 | 0.491039 |
| CFAP47    | Xp21.1   | 0.04428  | 0.388121 | 0.491303 |
| OR2T12    | 1q44     | 0.044277 | 0.388149 | 0.491308 |
| NOXRED1   | 14q24.3  | -0.04425 | 0.388468 | 0.491659 |
| C15ORF54  | 15q14    | 0.044247 | 0.388476 | 0.491659 |
| RFLNA     | 12q24.31 | -0.04423 | 0.38863  | 0.491822 |
| CKB       | 14q32.33 | 0.044228 | 0.388678 | 0.491853 |
| SLC25A20  | 3p21.31  | -0.0442  | 0.388937 | 0.492149 |
| ZBTB40    | 1p36.12  | 0.044177 | 0.389228 | 0.492487 |
| MROH7     | 1p32.3   | -0.04415 | 0.389508 | 0.49281  |
| TMEM235   | 17q25.3  | -0.04414 | 0.38966  | 0.492971 |
| PIM1      | 6p21.2   | 0.044133 | 0.389701 | 0.492991 |

|            |              |          |          |          |
|------------|--------------|----------|----------|----------|
| SIGLECL1   | 19q13.41     | -0.04413 | 0.389752 | 0.493024 |
| ARL11      | 13q14.2      | -0.0441  | 0.390029 | 0.493344 |
| DGCR11     | 22q11.21     | -0.04407 | 0.390407 | 0.493791 |
| SNAP47     | 1q42.13      | -0.04405 | 0.390569 | 0.49396  |
| ZNF385A    | 12q13.13     | 0.04405  | 0.39059  | 0.49396  |
| KCNQ2      | 20q13.33     | 0.044015 | 0.390974 | 0.494414 |
| HNRNPH1    | 5q35.3       | -0.04401 | 0.391054 | 0.494484 |
| NEU4       | 2q37.3       | -0.04398 | 0.39133  | 0.494802 |
| ALDH5A1    | 6p22.3       | -0.04398 | 0.391358 | 0.494806 |
| CLEC11A    | 19q13.33     | -0.04397 | 0.391404 | 0.494833 |
| NSRP1      | 17q11.2      | 0.043952 | 0.391651 | 0.495114 |
| KCNU1      | 8p11.23      | 0.043929 | 0.391892 | 0.495387 |
| OR1K1      | 9q33.2       | 0.04391  | 0.392101 | 0.495598 |
| F9         | Xq27.1       | -0.04391 | 0.392109 | 0.495598 |
| PSG10P     | 19q13.2      | 0.043903 | 0.392172 | 0.495648 |
| KRTAP2-2   | 17q21.2      | 0.043892 | 0.392295 | 0.495771 |
| CD160      | 1q21.1       | 0.043878 | 0.392442 | 0.495927 |
| OR2A2      | 7q35         | -0.04387 | 0.392521 | 0.495994 |
| LRTM1      | 3p14.3       | 0.043849 | 0.392762 | 0.496268 |
| LINC00486  | 2p22.3       | 0.043833 | 0.392933 | 0.496453 |
| LEF1       | 4q25         | 0.043829 | 0.39298  | 0.49648  |
| ACACA      | 17q12        | 0.043795 | 0.393343 | 0.496907 |
| LMNTD1     | 12p12.1      | 0.043793 | 0.39337  | 0.496911 |
| SLC34A2    | 4p15.2       | 0.043782 | 0.393489 | 0.49703  |
| LAD1       | 1q32.1       | 0.043774 | 0.393566 | 0.497096 |
| CES2       | 16q22.1      | 0.04377  | 0.39361  | 0.49712  |
|            | 1-Dec 9q33.1 | -0.04375 | 0.393805 | 0.497334 |
| CLRN2      | 4p15.32      | -0.04375 | 0.393841 | 0.497342 |
| SLC36A3    | 5q33.1       | 0.043746 | 0.393874 | 0.497342 |
| CELA2A     | 1p36.21      | -0.04374 | 0.393885 | 0.497342 |
| CD5L       | 1q23.1       | 0.04371  | 0.394259 | 0.497782 |
| ST8SIA6    | 10p12.33     | 0.043704 | 0.394328 | 0.497833 |
| HIST1H2BD  | 6p22.2       | -0.0437  | 0.394349 | 0.497833 |
| INSRR      | 1q23.1       | 0.043675 | 0.394638 | 0.498167 |
| LCE1B      | 1q21.3       | 0.043656 | 0.394851 | 0.498404 |
| CACNG2     | 22q12.3      | 0.043637 | 0.395054 | 0.498629 |
| STARD7-AS1 | 2q11.2       | 0.043599 | 0.395471 | 0.499124 |
| KRT72      | 12q13.13     | -0.04356 | 0.395875 | 0.499602 |
| TCF15      | 20p13        | -0.04354 | 0.396131 | 0.499894 |
| NCCRP1     | 19q13.2      | -0.04353 | 0.396174 | 0.499917 |
| CXCL14     | 5q31.1       | -0.04353 | 0.396257 | 0.499989 |
| RNASE1     | 14q11.2      | 0.043506 | 0.396477 | 0.500235 |
| EXOSC10    | 1p36.22      | -0.04349 | 0.3966   | 0.50036  |
| FXYD4      | 10q11.21     | -0.04345 | 0.397058 | 0.500906 |
| PLEKHO1    | 1q21.2       | 0.043446 | 0.397129 | 0.500964 |
| FKBP1B     | 2p23.3       | 0.04344  | 0.39719  | 0.50101  |
| OR1E1      | 17p13.3      | 0.043434 | 0.397254 | 0.501058 |
| LINC01599  | 14q21.3      | 0.04343  | 0.397297 | 0.501082 |
| CEP85      | 1p36.11      | -0.04343 | 0.397347 | 0.501113 |
| PHF21B     | 22q13.31     | 0.043413 | 0.397482 | 0.501251 |
| TSPYL6     | 2p16.2       | 0.043407 | 0.397552 | 0.501308 |
| C1ORF185   | 1p32.3       | -0.04337 | 0.398001 | 0.501842 |
| PGPEP1L    | 15q26.3      | -0.04335 | 0.398123 | 0.501939 |
| METTL2B    | 7q32.1       | -0.04335 | 0.398128 | 0.501939 |
| TAGLN2     | 1q23.2       | -0.04335 | 0.39817  | 0.501959 |
| CTDNEP1    | 17p13.1      | 0.043348 | 0.398193 | 0.501959 |
| ABCA17P    | 16p13.3      | -0.04331 | 0.398577 | 0.502411 |
| REPS1      | 6q24.1       | 0.043302 | 0.398698 | 0.502531 |

|           |            |          |          |          |
|-----------|------------|----------|----------|----------|
| LDHC      | 11p15.1    | -0.04328 | 0.39889  | 0.502742 |
| FAM99B    | 11p15.5    | 0.043272 | 0.399021 | 0.502875 |
| OR10H1    | 19p13.12   | -0.04327 | 0.399069 | 0.502905 |
| SORCS3    | 10q25.1    | 0.043261 | 0.399146 | 0.502969 |
| SLC25A3   | 12q23.1    | -0.04323 | 0.399458 | 0.503332 |
| OR1F2P    | 16p13.3    | 0.043225 | 0.399532 | 0.503392 |
| PRPS1L1   | 7p21.1     | -0.04321 | 0.399715 | 0.503592 |
| TAF1B     | 2p25.1     | 0.043201 | 0.399802 | 0.503669 |
| PAXBP1    | 21q22.11   | -0.04319 | 0.399957 | 0.503833 |
| OR2W1     | 6p22.1     | 0.043175 | 0.400082 | 0.503958 |
| ACADL     | 2q34       | 0.043172 | 0.400114 | 0.503967 |
| CCDC146   | 7q11.23    | -0.04316 | 0.40023  | 0.504081 |
| TTLL1     | 22q13.2    | -0.04315 | 0.400319 | 0.504121 |
| DNAH1     | 3p21.1     | -0.04315 | 0.400324 | 0.504121 |
| OR11H12   | 14q11.2    | -0.04315 | 0.400337 | 0.504121 |
| ATXN3L    | Xp22.2     | 0.043149 | 0.400361 | 0.504121 |
| CHST10    | 2q11.2     | 0.04314  | 0.400468 | 0.504223 |
| COPS4     | 4q21.22    | 0.043132 | 0.400547 | 0.504291 |
| ZNF382    | 19q13.12   | 0.043111 | 0.400781 | 0.504554 |
| BST1      | 4p15.32    | 0.043096 | 0.400941 | 0.504703 |
| SPG21     | 15q22.31   | 0.043096 | 0.40095  | 0.504703 |
| SLC22A24  | 11q12.3    | -0.04309 | 0.401014 | 0.504751 |
| SLC45A4   | 8q24.3     | -0.04308 | 0.401089 | 0.504814 |
| LINC00298 | 2p25.1     | 0.043074 | 0.40119  | 0.504911 |
| C11ORF24  | 11q13.2    | 0.043071 | 0.401216 | 0.504911 |
| KRT8P41   | 11p15.4    | 0.043068 | 0.401249 | 0.504921 |
| MFRP      | 11q23.3    | 0.043061 | 0.401327 | 0.504987 |
| KLK10     | 19q13.41   | 0.043055 | 0.401397 | 0.505    |
| CCDC134   | 22q13.2    | -0.04305 | 0.401407 | 0.505    |
| OR5AK2    | 11q12.1    | -0.04305 | 0.401413 | 0.505    |
| LDHA      | 11p15.1    | -0.04303 | 0.401645 | 0.50526  |
| OR5T1     | 11q12.1    | -0.04297 | 0.402279 | 0.506026 |
| CGB8      | 19q13.33   | 0.04297  | 0.402329 | 0.506047 |
| TCEANC    | Xp22.2     | -0.04297 | 0.402346 | 0.506047 |
| ONECUT3   | 19p13.3    | 0.042959 | 0.402445 | 0.506139 |
| EEF1A2    | 20q13.33   | -0.04295 | 0.402552 | 0.506243 |
| ATP2B2    | 3p25.3     | 0.04293  | 0.402763 | 0.506457 |
| SPATA8    | 15q26.2    | 0.042929 | 0.402773 | 0.506457 |
| KRT6C     | 12q13.13   | 0.04291  | 0.402981 | 0.506682 |
| LRRC41    | 1p34.1-p33 | -0.04291 | 0.403025 | 0.506682 |
| GSTCD     | 4q24       | 0.042904 | 0.403046 | 0.506682 |
| MKNK1     | 1p33       | -0.0429  | 0.403053 | 0.506682 |
| CGB3      | 19q13.33   | 0.042893 | 0.403167 | 0.506792 |
| DNAL4     | 22q13.1    | -0.04289 | 0.403205 | 0.506809 |
| RBM34     | 1q42.3     | 0.04288  | 0.403316 | 0.506916 |
| LDAH      | 2p24.1     | -0.04287 | 0.403394 | 0.506982 |
| MSH2      | 2p21-p16.3 | -0.04283 | 0.403914 | 0.507604 |
| PITPNB    | 22q12.1    | -0.04282 | 0.403975 | 0.50763  |
| STT3A     | 11q24.2    | 0.042819 | 0.403985 | 0.50763  |
| CEACAM21  | 19q13.2    | 0.042814 | 0.40404  | 0.507656 |
| PRSS40A   | 2q21.1     | 0.042812 | 0.404056 | 0.507656 |
| SRP19     | 5q22.2     | -0.04281 | 0.404101 | 0.50768  |
| HOXB13    | 17q21.32   | 0.042805 | 0.404133 | 0.507688 |
| PLPBP     | 8p11.23    | -0.0428  | 0.404191 | 0.507729 |
| ZNF321P   | 19q13.41   | -0.04278 | 0.404449 | 0.508021 |
| DYNLT3    | Xp11.4     | 0.042765 | 0.404581 | 0.508151 |
| LRRIQ1    | 12q21.31   | 0.042763 | 0.404603 | 0.508151 |
| PRR26     | 10p15.3    | 0.042692 | 0.405379 | 0.509095 |

|              |                 |          |          |          |
|--------------|-----------------|----------|----------|----------|
| SMYD2        | 1q32.3          | -0.04269 | 0.405434 | 0.509127 |
| IQCF2        | 3p21.2          | -0.04269 | 0.405456 | 0.509127 |
| CALM3        | 19q13.32        | 0.042665 | 0.405681 | 0.509377 |
| TSPAN19      | 12q21.31        | -0.04263 | 0.406013 | 0.509763 |
| MUC12        | 7q22.1          | 0.04262  | 0.406172 | 0.50993  |
| DDX18        | 2q14.1          | 0.042612 | 0.406257 | 0.509997 |
| ZMAT4        | 8p11.21         | 0.042611 | 0.406276 | 0.509997 |
| FBP2         | 9q22.32         | 0.042591 | 0.406488 | 0.510231 |
| ZMYM6        | 1p34.3          | 0.042582 | 0.406594 | 0.510332 |
| LRRC37BP1    | 17q11.2         | 0.042567 | 0.406753 | 0.5105   |
| KIAA1211L    | 2q11.2          | 0.042557 | 0.406872 | 0.510617 |
| GTF2H2       | 5q13.2          | -0.04254 | 0.40701  | 0.510741 |
| LOC100134868 | 20p11.1         | -0.04254 | 0.407022 | 0.510741 |
| CYGB         | 17q25.1         | 0.042529 | 0.407179 | 0.510906 |
| OR2C3        | 1q44            | 0.042502 | 0.40747  | 0.511239 |
| IDH2         | 15q26.1         | -0.0425  | 0.407547 | 0.511304 |
| NOXO1        | 16p13.3         | -0.04249 | 0.407621 | 0.511364 |
| RAB6C        | 2q21.1          | 0.042481 | 0.407709 | 0.511443 |
| GALM         | 2p22.1          | -0.04248 | 0.407737 | 0.511446 |
| C1ORF131     | 1q42.2          | -0.04247 | 0.407792 | 0.511483 |
| KRT81        | 12q13.13        | -0.04247 | 0.407874 | 0.511554 |
| MEP1A        | 6p12.3          | 0.042431 | 0.408258 | 0.512004 |
| GC           | 4q13.3          | -0.04242 | 0.408343 | 0.512077 |
| B9D2         | 19q13.2         | -0.04242 | 0.408387 | 0.512101 |
| INPP5A       | 10q26.3         | 0.042391 | 0.408704 | 0.512466 |
| SNORA77      | 1q32.1          | -0.04238 | 0.408813 | 0.512571 |
| AIPL1        | 17p13.2         | 0.042377 | 0.408852 | 0.512588 |
| PTPRCAP      | 11q13.2         | 0.042371 | 0.408923 | 0.512628 |
| KCNF1        | 2p25.1          | 0.04237  | 0.408935 | 0.512628 |
| TNFRSF1A     | 12p13.31        | 0.042363 | 0.409016 | 0.512697 |
| GMPR2        | 14q12           | 0.042358 | 0.40907  | 0.512733 |
| C19ORF57     | 19p13.12        | 0.042351 | 0.409149 | 0.512795 |
| PRTFDC1      | 10p12.1         | -0.04235 | 0.409171 | 0.512795 |
| OR10G8       | 11q24.2         | 0.042327 | 0.409412 | 0.513065 |
| LINC02593    | 1p36.33         | -0.04231 | 0.409586 | 0.513251 |
| OPN1LW       | Xq28            | -0.04227 | 0.410011 | 0.513752 |
| OR2T8        | 1q44            | 0.042267 | 0.410073 | 0.513797 |
| P2RX2        | 12q24.33        | 0.042257 | 0.410185 | 0.513906 |
| AMN1         | 12p11.21        | -0.04225 | 0.410222 | 0.51392  |
| SOX9         | 17q24.3         | 0.042245 | 0.410318 | 0.514007 |
| C1ORF194     | 1p13.3          | -0.04224 | 0.410384 | 0.514058 |
| PLA2G5       | 1p36.13         | 0.04223  | 0.410483 | 0.514149 |
| PTPRVP       | 1q32.1          | -0.04222 | 0.410649 | 0.514325 |
| CHD1L        | 1q21.1          | 0.04221  | 0.410702 | 0.51436  |
| SLC17A1      | 6p22.2          | 0.042198 | 0.410846 | 0.514476 |
| RNF185       | 22q12.2         | 0.042198 | 0.410846 | 0.514476 |
| NOP10        | 15q14           | -0.04218 | 0.411073 | 0.514728 |
| C17ORF82     | 17q23.2         | 0.042164 | 0.411218 | 0.514878 |
| SLC22A7      | 6p21.1          | -0.04213 | 0.411632 | 0.515364 |
| B3GNT3       | 19p13.11        | 0.042115 | 0.411757 | 0.515487 |
| RNF212       | 4p16.3          | -0.04211 | 0.41187  | 0.515597 |
| UBE2U        | 1p31.3          | -0.0421  | 0.411964 | 0.515683 |
| PGPEP1       | 19p13.11        | 0.042086 | 0.412084 | 0.515801 |
| PEX1         | 7q21.2          | -0.04208 | 0.412132 | 0.515829 |
| SNORA15      | 7p11.2          | -0.04208 | 0.412198 | 0.515879 |
| NLRP11       | 19q13.42-q13.43 | 0.042068 | 0.412281 | 0.5159   |
| TM4SF19      | 3q29            | 0.042067 | 0.412295 | 0.5159   |
| ANXA11       | 10q22.3         | 0.042067 | 0.4123   | 0.5159   |

|            |          |          |          |          |
|------------|----------|----------|----------|----------|
| BPIFB1     | 20q11.21 | 0.042065 | 0.412318 | 0.5159   |
| CLCF1      | 11q13.2  | 0.042061 | 0.41236  | 0.51592  |
| ELSPBP1    | 19q13.33 | 0.042057 | 0.412407 | 0.515947 |
| STPG1      | 1p36.11  | 0.042049 | 0.412501 | 0.51603  |
| CREB5      | 7p15.1   | 0.042046 | 0.412525 | 0.51603  |
| SUGP2      | 19p13.11 | -0.04204 | 0.412618 | 0.516103 |
| NRG3       | 10q23.1  | 0.042035 | 0.412656 | 0.516103 |
| PNLDC1     | 6q25.3   | -0.04203 | 0.412661 | 0.516103 |
| OR13F1     | 9q31.1   | 0.042029 | 0.412719 | 0.516143 |
| PIGF       | 2p21     | -0.04202 | 0.412786 | 0.516195 |
| TMEM170B   | 6p24.2   | -0.04201 | 0.41298  | 0.516406 |
| WDR24      | 16p13.3  | -0.042   | 0.41309  | 0.516511 |
| MCF2       | Xq27.1   | 0.04199  | 0.413148 | 0.516551 |
| HLA-DMA    | 6p21.32  | 0.041987 | 0.413182 | 0.516561 |
| RNF175     | 4q31.3   | 0.041967 | 0.413404 | 0.516806 |
| LTF        | 3p21.31  | -0.04195 | 0.413557 | 0.516932 |
| TEAD2      | 19q13.33 | 0.041954 | 0.413558 | 0.516932 |
| C3ORF18    | 3p21.31  | 0.041951 | 0.413582 | 0.516932 |
| IPO4       | 14q12    | -0.04195 | 0.413652 | 0.516987 |
| ARRB1      | 11q13.4  | -0.04192 | 0.413944 | 0.517321 |
| IL17F      | 6p12.2   | -0.0419  | 0.414104 | 0.517488 |
| LEP        | 7q32.1   | 0.041887 | 0.414295 | 0.517695 |
| VPS9D1     | 16q24.3  | -0.04188 | 0.414326 | 0.517701 |
| RB1CC1     | 8q11.23  | 0.04185  | 0.414713 | 0.51812  |
| CALR3      | 19p13.11 | 0.041848 | 0.414739 | 0.51812  |
| KCTD7      | 7q11.21  | -0.04185 | 0.414739 | 0.51812  |
| MGST1      | 12p12.3  | -0.04184 | 0.414818 | 0.518187 |
| OR8A1      | 11q24.2  | -0.04184 | 0.414864 | 0.518194 |
| PLET1      | 11q23.1  | 0.041835 | 0.414876 | 0.518194 |
| MBD3L5     | 19p13.2  | 0.041821 | 0.415042 | 0.518369 |
| CRISP1     | 6p12.3   | 0.041812 | 0.415142 | 0.518462 |
| IL23A      | 12q13.3  | 0.041792 | 0.415362 | 0.518689 |
| GFRA4      | 20p13    | -0.04179 | 0.415376 | 0.518689 |
| CLDN7      | 17p13.1  | 0.041786 | 0.415424 | 0.518717 |
| PCDHGB8P   | 5q31.3   | 0.041767 | 0.415635 | 0.518947 |
| TP53TG3B   | 16p11.2  | 0.041764 | 0.415679 | 0.51897  |
| CXCL1      | 4q13.3   | -0.04176 | 0.415734 | 0.519007 |
| TTR        | 18q12.1  | -0.04175 | 0.415818 | 0.519075 |
| GFRAL      | 6p12.1   | 0.041749 | 0.415841 | 0.519075 |
| SERPINB11  | 18q21.33 | 0.041739 | 0.415949 | 0.519178 |
| IFNL2      | 19q13.2  | -0.04172 | 0.416213 | 0.519475 |
| CA7        | 16q22.1  | 0.041703 | 0.416351 | 0.519615 |
| TMEM51-AS1 | 1p36.21  | -0.04168 | 0.416618 | 0.519916 |
| MECP2      | Xq28     | 0.04167  | 0.416722 | 0.520013 |
| MAP1LC3B   | 16q24.2  | -0.04165 | 0.416948 | 0.520217 |
| WDR49      | 3q26.1   | 0.041649 | 0.416961 | 0.520217 |
| MYO3B      | 2q31.1   | 0.041649 | 0.416964 | 0.520217 |
| C15ORF41   | 15q14    | 0.04164  | 0.417059 | 0.520304 |
| SPEF2      | 5p13.2   | 0.041637 | 0.417097 | 0.520314 |
| PHKA1      | Xq13.1   | 0.041635 | 0.417119 | 0.520314 |
| DSG3       | 18q12.1  | 0.041623 | 0.417249 | 0.520444 |
| PRRX2      | 9q34.11  | 0.04162  | 0.417283 | 0.520454 |
| KCNAB3     | 17p13.1  | -0.04161 | 0.417352 | 0.520474 |
| FUT3       | 19p13.3  | 0.041613 | 0.417365 | 0.520474 |
| SCARNA22   | 4p16.3   | -0.04161 | 0.41741  | 0.520474 |
| FAM225A    | 9q32     | 0.041606 | 0.417441 | 0.520474 |
| TSGA10IP   | 11q13.1  | 0.041604 | 0.417464 | 0.520474 |
| SOX8       | 16p13.3  | 0.041603 | 0.417476 | 0.520474 |



|           |          |          |          |          |
|-----------|----------|----------|----------|----------|
| MDM1      | 12q15    | -0.0416  | 0.417481 | 0.520474 |
| CEACAM19  | 19q13.31 | 0.041599 | 0.417524 | 0.520495 |
| PDHX      | 11p13    | -0.0416  | 0.417553 | 0.520499 |
| CDCA7L    | 7p15.3   | -0.04157 | 0.417816 | 0.520794 |
| COMMD2    | 3q25.1   | 0.041553 | 0.418041 | 0.521042 |
| MAP3K8    | 10p11.23 | -0.04152 | 0.418386 | 0.52144  |
| PITRM1    | 10p15.2  | 0.041516 | 0.418446 | 0.521482 |
| LRRD1     | 7q21.2   | -0.0415  | 0.41863  | 0.52168  |
| TMEM257   | Xq27.3   | 0.041484 | 0.418809 | 0.52187  |
| TXLNA     | 1p35.2   | 0.041474 | 0.41892  | 0.521961 |
| GUSB      | 7q11.21  | 0.041473 | 0.418934 | 0.521961 |
| DGCR10    | 22q11.21 | 0.041458 | 0.419099 | 0.522125 |
| OSM       | 22q12.2  | 0.041457 | 0.419118 | 0.522125 |
| HORMAD2   | 22q12.2  | -0.04143 | 0.419449 | 0.522494 |
| ZBTB8B    | 1p35.1   | -0.04143 | 0.419466 | 0.522494 |
| MIMT1     | 19q13.43 | 0.041414 | 0.419591 | 0.522616 |
| FAM170B   | 10q11.23 | 0.041411 | 0.419633 | 0.522637 |
| PSG11     | 19q13.31 | -0.0414  | 0.419729 | 0.522723 |
| ATP6AP2   | Xp11.4   | -0.04138 | 0.419931 | 0.522942 |
| SLC14A2   | 18q12.3  | 0.041375 | 0.42003  | 0.523033 |
| DAD1P1    | 12p12.1  | -0.04137 | 0.420095 | 0.523082 |
| NXF5      | Xq22.1   | -0.04136 | 0.420164 | 0.523134 |
| FAM25BP   | 10q11.22 | -0.04135 | 0.420293 | 0.523263 |
| DEFB104A  | 8p23.1   | -0.04135 | 0.420346 | 0.523297 |
| RCOR2     | 11q13.1  | 0.041341 | 0.42042  | 0.523339 |
| MYBPC2    | 19q13.33 | 0.041338 | 0.420445 | 0.523339 |
| EPHX4     | 1p22.1   | -0.04134 | 0.420458 | 0.523339 |
| PLA2R1    | 2q24.2   | -0.04133 | 0.420526 | 0.523391 |
| CLDN25    | 11q23.2  | 0.041324 | 0.420612 | 0.523454 |
| IDO1      | 8p11.21  | 0.041322 | 0.420629 | 0.523454 |
| SLC38A7   | 16q21    | 0.041299 | 0.42089  | 0.523716 |
| TAAR2     | 6q23.2   | -0.0413  | 0.420893 | 0.523716 |
| DOC2A     | 16p11.2  | -0.04129 | 0.421022 | 0.523835 |
| KRT28     | 17q21.2  | 0.041286 | 0.421041 | 0.523835 |
| ACTL6B    | 7q22.1   | 0.041282 | 0.42108  | 0.523852 |
| UPK1B     | 3q13.32  | 0.041276 | 0.421148 | 0.523894 |
| IRGQ      | 19q13.31 | -0.04127 | 0.421166 | 0.523894 |
| TPI1P2    | 7q32.1   | -0.04126 | 0.421353 | 0.524093 |
| CYP26A1   | 10q23.33 | -0.04125 | 0.421432 | 0.52414  |
| BTN2A3P   | 6p22.2   | -0.04125 | 0.421442 | 0.52414  |
| PRR18     | 6q27     | -0.04122 | 0.421743 | 0.524481 |
| MAS1      | 6q25.3   | 0.041215 | 0.421841 | 0.524568 |
| SLCO1A2   | 12p12.1  | 0.041212 | 0.421865 | 0.524568 |
| SPOP      | 17q21.33 | -0.0412  | 0.421954 | 0.524621 |
| C7ORF31   | 7p15.3   | 0.041201 | 0.421998 | 0.524621 |
| GLMP      | 1q22     | 0.0412   | 0.422005 | 0.524621 |
| C7ORF57   | 7p12.3   | -0.0412  | 0.422012 | 0.524621 |
| LINC00319 | 21q22.3  | -0.04117 | 0.422373 | 0.525036 |
| FAM201A   | 9p13.1   | 0.041159 | 0.422472 | 0.525105 |
| TCP11     | 6p21.31  | -0.04116 | 0.422481 | 0.525105 |
| HHIPL2    | 1q41     | -0.04115 | 0.422537 | 0.525142 |
| OR5C1     | 9q33.2   | 0.041144 | 0.422637 | 0.525234 |
| TOMM20    | 1q42.3   | 0.04112  | 0.422906 | 0.52553  |
| TAAR5     | 6q23.2   | -0.04112 | 0.422954 | 0.52553  |
| OR2M2     | 1q44     | -0.04112 | 0.422954 | 0.52553  |
| EDDM3A    | 14q11.2  | 0.041107 | 0.423059 | 0.525628 |
| CALCB     | 11p15.2  | -0.04109 | 0.423301 | 0.525896 |
| CAPNS2    | 16q12.2  | -0.04108 | 0.423368 | 0.525947 |

|           |                |          |          |          |
|-----------|----------------|----------|----------|----------|
| ETS2      | 21q22.2        | -0.04107 | 0.423419 | 0.525978 |
| SAMD3     | 6q23.1         | -0.04107 | 0.4235   | 0.526045 |
| FGF6      | 12p13.32       | 0.041053 | 0.423665 | 0.526197 |
| SEPTIN3   | 22q13.2        | -0.04105 | 0.423675 | 0.526197 |
| KLK12     | 19q13.41       | 0.041024 | 0.423986 | 0.526552 |
| CHRNA1    | 17p13.1        | -0.04102 | 0.424081 | 0.526635 |
| MCEMP1    | 19p13.2        | 0.041012 | 0.424131 | 0.526635 |
| SSX1      | Xp11.23        | -0.04101 | 0.424132 | 0.526635 |
| CLUH      | 17p13.3        | -0.041   | 0.424288 | 0.526766 |
| DHX57     | 2p22.1         | 0.040998 | 0.42429  | 0.526766 |
| FGD3      | 9q22.31        | 0.040991 | 0.424367 | 0.526829 |
| CDH18     | 5p14.3         | -0.04099 | 0.424395 | 0.52683  |
| FBXO27    | 19q13.2        | 0.040984 | 0.424449 | 0.526865 |
| IMPG1     | 6q14.1         | 0.040973 | 0.424572 | 0.526985 |
| DOT1L     | 19p13.3        | 0.040962 | 0.424687 | 0.527096 |
| MAP3K20   | 2q31.1         | -0.04096 | 0.424756 | 0.527148 |
| SNX22     | 15q22.31       | -0.04094 | 0.424909 | 0.527305 |
| ZNF157    | Xp11.3         | 0.040939 | 0.424953 | 0.527327 |
| PAK4      | 19q13.2        | -0.04093 | 0.42505  | 0.527416 |
| CUL9      | 6p21.1         | 0.040903 | 0.425355 | 0.527746 |
| CLK3      | 15q24.1        | 0.040902 | 0.42537  | 0.527746 |
| GRK3      | 22q12.1        | -0.0409  | 0.425399 | 0.52775  |
| WNT4      | 1p36.12        | -0.04089 | 0.425502 | 0.527815 |
| SPATA7    | 14q31.3        | -0.04089 | 0.425504 | 0.527815 |
|           | 10-Mar 17q23.2 | 0.040885 | 0.425564 | 0.527856 |
| CYP4A11   | 1p33           | -0.04087 | 0.425717 | 0.528014 |
| MYH1      | 17p13.1        | 0.040862 | 0.425823 | 0.528105 |
| TCEANC2   | 1p32.3         | 0.04086  | 0.42585  | 0.528105 |
| XAGE1B    | Xp11.22        | 0.040858 | 0.42587  | 0.528105 |
| NTS       | 12q21.31       | -0.04085 | 0.425927 | 0.528144 |
| OR6S1     | 14q11.2        | 0.04084  | 0.426079 | 0.528299 |
| PRKDC     | 8q11.21        | 0.040834 | 0.426143 | 0.528346 |
| GPATCH1   | 19q13.11       | -0.04083 | 0.426234 | 0.5284   |
| TRMO      | 9q22.33        | -0.04083 | 0.42624  | 0.5284   |
| THAP6     | 4q21.1         | 0.040819 | 0.426314 | 0.52846  |
| NOX1      | Xq22.1         | 0.040804 | 0.42648  | 0.528633 |
| PHYHD1    | 9q34.11        | 0.040802 | 0.426511 | 0.528638 |
| KRTAP10-8 | 21q22.3        | -0.04079 | 0.426605 | 0.528722 |
| TERF2     | 16q22.1        | 0.040787 | 0.426671 | 0.528771 |
| FUT4      | 11q21          | 0.040752 | 0.427076 | 0.529221 |
| TMC2      | 20p13          | -0.04075 | 0.427093 | 0.529221 |
| TOP1      | 20q12          | -0.04075 | 0.427115 | 0.529221 |
| HEPACAM   | 11q24.2        | 0.040746 | 0.42714  | 0.529221 |
| NECAP2    | 1p36.13        | -0.04073 | 0.427287 | 0.52937  |
| AADACL3   | 1p36.21        | -0.0407  | 0.427625 | 0.529756 |
| IFNW1     | 9p21.3         | 0.040689 | 0.427794 | 0.529934 |
| GABRA5    | 15q12          | 0.040668 | 0.428033 | 0.530196 |
| LIPI      | 21q11.2        | -0.04066 | 0.428077 | 0.530218 |
| MTRR      | 5p15.31        | 0.040659 | 0.428128 | 0.530249 |
| KRTAP21-1 | 21q22.11       | -0.04065 | 0.428217 | 0.530326 |
| DMAC2L    | 14q21.3        | 0.040635 | 0.428397 | 0.530467 |
| HSPA4     | 5q31.1         | 0.040633 | 0.428427 | 0.530467 |
| GYPB      | 4q31.21        | 0.040632 | 0.428435 | 0.530467 |
| MRGPRD    | 11q13.3        | -0.04063 | 0.428438 | 0.530467 |
| RDH5      | 12q13.2        | 0.04063  | 0.428463 | 0.530467 |
| CSAG3     | Xq28           | -0.04058 | 0.428982 | 0.531077 |
| HOXD9     | 2q31.1         | 0.040555 | 0.429316 | 0.531457 |
| IRX6      | 16q12.2        | -0.04054 | 0.429486 | 0.531634 |

|              |                 |          |          |          |
|--------------|-----------------|----------|----------|----------|
| WDR25        | 14q32.2         | 0.040524 | 0.429667 | 0.531825 |
| ERLIN1       | 10q24.31        | 0.040499 | 0.429949 | 0.532142 |
| MUCL1        | 12q13.2         | -0.04049 | 0.430003 | 0.532176 |
| CXCL8        | 4q13.3          | 0.040491 | 0.430037 | 0.532185 |
| HOXC8        | 12q13.13        | 0.040478 | 0.43019  | 0.532342 |
| HPVC1        | 7p11.2          | 0.040465 | 0.430334 | 0.532469 |
| TMEM237      | 2q33.1          | -0.04046 | 0.430346 | 0.532469 |
| WDFY2        | 13q14.3         | 0.040453 | 0.430476 | 0.532597 |
| TMEM33       | 4p13            | -0.04045 | 0.430513 | 0.53261  |
| KRT6B        | 12q13.13        | 0.040435 | 0.430678 | 0.532781 |
| TMEM86A      | 11p15.1         | 0.040392 | 0.431172 | 0.533359 |
| MS4A6E       | 11q12.2         | 0.040372 | 0.431397 | 0.533577 |
| CACNA1G      | 17q21.33        | 0.040372 | 0.431401 | 0.533577 |
| TEKT4P2      | 21p11.2         | 0.040369 | 0.431432 | 0.533582 |
| GTF2IRD2P1   | 7q11.23         | 0.040363 | 0.431501 | 0.533634 |
| SPATA19      | 11q25           | -0.04036 | 0.431581 | 0.5337   |
| NXPH4        | 12q13.3         | -0.04034 | 0.431725 | 0.533845 |
| PIPSL        | 10q23.33        | -0.04034 | 0.431799 | 0.533903 |
| COG6         | 13q14.11        | -0.04033 | 0.43189  | 0.533977 |
| ZNF480       | 19q13.41        | -0.04033 | 0.431912 | 0.533977 |
| GJB1         | Xq13.1          | -0.04032 | 0.432    | 0.534054 |
| SPINT4       | 20q13.12        | 0.040308 | 0.432128 | 0.534178 |
| SLC39A2      | 14q11.2         | -0.0403  | 0.432224 | 0.534264 |
| GMPS         | 3q25.31         | -0.04028 | 0.432401 | 0.534451 |
| KCNJ8        | 12p12.1         | 0.040265 | 0.432628 | 0.534698 |
| RPL13P5      | 12p13.31        | -0.04025 | 0.432771 | 0.534841 |
| ULK3         | 15q24.1         | 0.040246 | 0.432837 | 0.53489  |
| NEPRO        | 3q13.2          | -0.04024 | 0.432953 | 0.535    |
| GPR155       | 2q31.1          | 0.040227 | 0.433057 | 0.535069 |
| LOC391343    | 2p25.3          | -0.04023 | 0.433062 | 0.535069 |
| ALS2         | 2q33.1          | 0.040209 | 0.433268 | 0.535291 |
| LOC606724    | 16p11.2         | 0.04018  | 0.43359  | 0.535655 |
| TFAP2C       | 20q13.31        | 0.040176 | 0.433637 | 0.53568  |
| PPP1R17      | 7p14.3          | -0.04017 | 0.433665 | 0.535682 |
| GTSF1        | 12q13.13        | 0.040171 | 0.433695 | 0.535685 |
| GAL3ST1      | 22q12.2         | -0.04015 | 0.433917 | 0.535927 |
| TSPAN9       | 12p13.33-p13.32 | 0.040138 | 0.43408  | 0.536095 |
| CUL4B        | Xq24            | 0.04013  | 0.434166 | 0.536127 |
| SMN1         | 5q13.2          | 0.040129 | 0.434181 | 0.536127 |
| PDZK1        | 1q21.1          | -0.04013 | 0.434186 | 0.536127 |
| SKA2         | 17q22           | 0.040105 | 0.43446  | 0.536432 |
| LRRC37A3     | 17q24.1         | -0.0401  | 0.434499 | 0.536448 |
| NRG2         | 5q31.2          | 0.040075 | 0.434798 | 0.536783 |
| OR2L3        | 1q44            | 0.040036 | 0.435252 | 0.537311 |
| DSPP         | 4q22.1          | -0.04003 | 0.435337 | 0.537382 |
| BST2         | 19p13.11        | -0.04001 | 0.435559 | 0.537623 |
| CES1         | 16q12.2         | -0.04    | 0.43567  | 0.537728 |
| LOC100192426 | 18p11.23        | 0.039997 | 0.4357   | 0.537731 |
| ZNF350       | 19q13.41        | -0.03999 | 0.435763 | 0.537776 |
| GPC1         | 2q37.3          | 0.039983 | 0.435853 | 0.537854 |
| LY6E-DT      | 8q24.3          | 0.039968 | 0.43603  | 0.53804  |
| BTNL3        | 5q35.3          | 0.039965 | 0.436065 | 0.538049 |
| LINC00051    | 8q24.3          | -0.03995 | 0.436267 | 0.538265 |
| IRAK2        | 3p25.3          | 0.039918 | 0.436608 | 0.538652 |
| PWAR4        | 15q11.2         | -0.03991 | 0.436665 | 0.53869  |
| GTPBP10      | 7q21.13         | -0.03987 | 0.43717  | 0.53928  |
| OR5M11       | 11q12.1         | 0.039858 | 0.437292 | 0.539357 |
| MYOM2        | 8p23.3          | -0.03986 | 0.437309 | 0.539357 |

|           |          |          |          |          |
|-----------|----------|----------|----------|----------|
| ENPEP     | 4q25     | 0.039856 | 0.437314 | 0.539357 |
| LSR       | 19q13.12 | -0.03984 | 0.437462 | 0.539507 |
| OTP       | 5q14.1   | 0.039841 | 0.437493 | 0.539512 |
| GDPD4     | 11q13.5  | 0.039836 | 0.437543 | 0.539539 |
| TBC1D29P  | 17q11.2  | -0.03983 | 0.437569 | 0.539539 |
| CEP19     | 3q29     | -0.03983 | 0.437614 | 0.539561 |
| CASC10    | 10p12.31 | 0.039809 | 0.43786  | 0.539832 |
| C2CD4B    | 15q22.2  | 0.039771 | 0.438294 | 0.540334 |
| EVX2      | 2q31.1   | 0.039767 | 0.438346 | 0.540365 |
| SHC3      | 9q22.1   | 0.039763 | 0.438386 | 0.54038  |
| ARMCX3    | Xq22.1   | 0.039758 | 0.438447 | 0.540422 |
| ACTRT2    | 1p36.32  | -0.03972 | 0.438858 | 0.540629 |
| RBMY1A3P  | Yp11.2   | -0.03972 | 0.438858 | 0.540629 |
| FAM197Y2  | Yp11.2   | -0.03972 | 0.438858 | 0.540629 |
| TFAP2D    | 6p12.3   | -0.03972 | 0.438858 | 0.540629 |
| KRTAP20-4 | 21q22.11 | -0.03972 | 0.438858 | 0.540629 |
| TSPY4     | Yp11.2   | -0.03972 | 0.438858 | 0.540629 |
| CBLL2     | Xp22.11  | -0.03972 | 0.438858 | 0.540629 |
| DEFB107A  | 8p23.1   | -0.03972 | 0.438858 | 0.540629 |
| PRAMEF22  | 1p36.21  | -0.03972 | 0.438858 | 0.540629 |
| MORC4     | Xq22.3   | 0.039694 | 0.439177 | 0.540989 |
| FAM78B    | 1q24.1   | 0.039679 | 0.439358 | 0.541179 |
| RSPH4A    | 6q22.1   | -0.03968 | 0.439401 | 0.541198 |
| ACOT4     | 14q24.3  | 0.039652 | 0.43967  | 0.541496 |
| LCORL     | 4p15.31  | 0.039647 | 0.439721 | 0.541526 |
| TASP1     | 20p12.1  | -0.03962 | 0.439999 | 0.541835 |
| ACOT12    | 5q14.1   | -0.03962 | 0.440071 | 0.54189  |
| HIST1H2BK | 6p22.1   | -0.03961 | 0.440121 | 0.541919 |
| PMCH      | 12q23.2  | -0.0396  | 0.440231 | 0.542021 |
| PRIM1     | 12q13.3  | -0.0396  | 0.440268 | 0.542033 |
| HIST1H2BA | 6p22.2   | -0.0396  | 0.44032  | 0.542048 |
| NEUROG2   | 4q25     | -0.03959 | 0.440335 | 0.542048 |
| PKN3      | 9q34.11  | -0.03958 | 0.440472 | 0.542184 |
| CYMP      | 1p13.3   | -0.03957 | 0.440612 | 0.542323 |
| S100A14   | 1q21.3   | 0.039558 | 0.440753 | 0.542451 |
| DUPD1     | 10q22.2  | 0.039557 | 0.44077  | 0.542451 |
| SOX18     | 20q13.33 | -0.03955 | 0.440858 | 0.542525 |
| PGA5      | 11q12.2  | 0.03954  | 0.440966 | 0.542626 |
| FABP1     | 2p11.2   | 0.039532 | 0.441057 | 0.542704 |
| ZFP57     | 6p22.1   | 0.039517 | 0.441222 | 0.542874 |
| YPEL5     | 2p23.1   | 0.03951  | 0.441306 | 0.542943 |
| GOLGA2P7  | 15q25.2  | -0.03951 | 0.441346 | 0.542959 |
| METTL9    | 16p12.2  | -0.03949 | 0.441547 | 0.543174 |
| DEFB119   | 20q11.21 | 0.039448 | 0.442025 | 0.543695 |
| HIST1H1T  | 6p22.2   | 0.039448 | 0.442026 | 0.543695 |
| IGFLR1    | 19q13.12 | -0.03944 | 0.442066 | 0.543711 |
| ZNF287    | 17p11.2  | 0.039436 | 0.442165 | 0.543787 |
| RAMP2     | 17q21.2  | -0.03943 | 0.442182 | 0.543787 |
| IGF2BP3   | 7p15.3   | -0.03943 | 0.442288 | 0.543884 |
| GPR148    | 2q21.1   | -0.03942 | 0.442341 | 0.543916 |
| SLC16A10  | 6q21     | -0.03941 | 0.442432 | 0.543995 |
| PPP4R1L   | 20q13.32 | 0.039408 | 0.442487 | 0.544029 |
| ASB4      | 7q21.3   | -0.03938 | 0.442789 | 0.544367 |
| COLEC10   | 8q24.12  | 0.03936  | 0.443049 | 0.544653 |
| RDH8      | 19p13.2  | -0.03936 | 0.443087 | 0.544667 |
| TMEM244   | 6q22.33  | -0.03933 | 0.443339 | 0.544943 |
| FAM133A   | Xq21.32  | 0.039325 | 0.443454 | 0.54505  |
| SKP2      | 5p13.2   | -0.03932 | 0.443526 | 0.545105 |

|           |                 |          |          |          |
|-----------|-----------------|----------|----------|----------|
| PPIAL4E   | 1q21.1          | -0.03932 | 0.443561 | 0.545115 |
| GGTLC1    | 20p11.21        | -0.03931 | 0.443621 | 0.545155 |
| ATL2      | 2p22.2-p22.1    | -0.03929 | 0.443878 | 0.545438 |
| GRM5      | 11q14.2-q14.3   | 0.039276 | 0.444023 | 0.545582 |
| SRP72     | 4q12            | 0.039267 | 0.44413  | 0.545681 |
| RSPH9     | 6p21.1          | 0.039255 | 0.444263 | 0.545783 |
| INTS6L    | Xq26.3          | 0.039255 | 0.444268 | 0.545783 |
| PTCD2     | 5q13.2          | -0.03924 | 0.444405 | 0.545918 |
| HMMR      | 5q34            | -0.03923 | 0.444515 | 0.54602  |
| EDRF1     | 10q26.2         | 0.039226 | 0.444595 | 0.546085 |
| NEUROG3   | 10q22.1         | -0.03918 | 0.445114 | 0.546678 |
| LRATD2    | 8q24.21         | -0.03918 | 0.445133 | 0.546678 |
| CCDC125   | 5q13.2          | 0.039152 | 0.445464 | 0.547017 |
| VPS33A    | 12q24.31        | -0.03915 | 0.445464 | 0.547017 |
| MAL2      | 8q24.12         | -0.03915 | 0.445491 | 0.547017 |
| PTGER1    | 19p13.12        | 0.039129 | 0.445724 | 0.54727  |
| SIRT4     | 12q24.23-q24.31 | -0.03913 | 0.445762 | 0.547282 |
| SPATA20   | 17q21.33        | 0.039113 | 0.445917 | 0.547439 |
| PLA2G2E   | 1p36.13         | 0.039107 | 0.44598  | 0.547482 |
| TARBP1    | 1q42.2          | -0.0391  | 0.446022 | 0.547482 |
| RNLS      | 10q23.31        | 0.039103 | 0.446034 | 0.547482 |
| ASB9      | Xp22.2          | -0.0391  | 0.446095 | 0.547524 |
| MCM4      | 8q11.21         | -0.03909 | 0.44614  | 0.547545 |
| COQ2      | 4q21.22-q21.23  | 0.039084 | 0.446258 | 0.547656 |
| C17ORF47  | 17q22           | -0.03908 | 0.446313 | 0.547691 |
| RAP2A     | 13q32.1         | 0.039076 | 0.446348 | 0.5477   |
| TMEM200A  | 6q23.1          | 0.039046 | 0.446694 | 0.548091 |
| TMPO-AS1  | 12q23.1         | 0.039039 | 0.446782 | 0.54812  |
| LINC01278 | Xq11.1          | -0.03904 | 0.446793 | 0.54812  |
| C14ORF119 | 14q11.2         | -0.03904 | 0.446799 | 0.54812  |
| SLC4A1AP  | 2p23.3          | 0.03903  | 0.446885 | 0.548191 |
| DMRTC1    | Xq13.1          | 0.039026 | 0.446925 | 0.548201 |
| PCDHA7    | 5q31.3          | 0.039022 | 0.446973 | 0.548201 |
| TMC6      | 17q25.3         | -0.03902 | 0.446975 | 0.548201 |
| DDIT4L    | 4q24            | 0.039005 | 0.44717  | 0.548407 |
| GAS8-AS1  | 16q24.3         | -0.03897 | 0.447612 | 0.548915 |
| PADI6     | 1p36.13         | -0.03895 | 0.44784  | 0.549159 |
| ODF3      | 11p15.5         | 0.038946 | 0.447866 | 0.549159 |
| ZMAT1     | Xq22.1          | 0.038937 | 0.447967 | 0.549249 |
| OR52A5    | 11p15.4         | 0.038933 | 0.448017 | 0.549276 |
| RTBDN     | 19p13.13        | -0.03893 | 0.448045 | 0.549278 |
| LYRM2     | 6q15            | 0.038925 | 0.448105 | 0.549317 |
| CDRT15    | 17p12           | 0.038913 | 0.448244 | 0.549454 |
| MED14     | Xp11.4          | 0.038904 | 0.448348 | 0.54953  |
| SMAGP     | 12q13.13        | 0.038903 | 0.448361 | 0.54953  |
| ADAMTS14  | 10q22.1         | 0.038884 | 0.448582 | 0.549768 |
| PLEKHS1   | 10q25.3         | 0.038874 | 0.448705 | 0.549885 |
| MYLK3     | 16q11.2         | 0.038844 | 0.449053 | 0.550262 |
| COPS3     | 17p11.2         | 0.038841 | 0.449083 | 0.550262 |
| DAPL1     | 2q24.1          | -0.03884 | 0.449095 | 0.550262 |
| STK33     | 11p15.4         | -0.03883 | 0.449223 | 0.550385 |
| PDHA2     | 4q22.3          | -0.03881 | 0.449458 | 0.550639 |
| KIF2B     | 17q22           | 0.038793 | 0.449649 | 0.550772 |
| OR6Q1     | 11q12.1         | 0.038793 | 0.449649 | 0.550772 |
| ELL       | 19p13.11        | 0.038793 | 0.449649 | 0.550772 |
| TTYH1     | 19q13.42        | 0.038786 | 0.44973  | 0.550838 |
| AHI1      | 6q23.3          | 0.038759 | 0.450042 | 0.551185 |
| WDR87     | 19q13.13        | 0.038754 | 0.450101 | 0.551224 |

|           |          |          |          |          |
|-----------|----------|----------|----------|----------|
| VTI1B     | 14q24.1  | -0.03875 | 0.45016  | 0.551263 |
| HCAR1     | 12q24.31 | -0.03874 | 0.450229 | 0.551296 |
| XKR9      | 8q13.3   | 0.038742 | 0.450242 | 0.551296 |
| SLCO1B1   | 12p12.1  | 0.038736 | 0.450312 | 0.551348 |
| LOC400710 | 19q13.33 | 0.038725 | 0.450447 | 0.551479 |
| ZNF142    | 2q35     | 0.038715 | 0.450563 | 0.551588 |
| TUSC7     | 3q13.31  | 0.038693 | 0.450815 | 0.551853 |
| SHCBP1L   | 1q25.3   | 0.038692 | 0.450835 | 0.551853 |
| ZFP64     | 20q13.2  | -0.03869 | 0.450881 | 0.551876 |
| RAD51     | 15q15.1  | 0.038682 | 0.450944 | 0.551919 |
| OR2B6     | 6p22.1   | -0.03867 | 0.451141 | 0.552126 |
| ZNF506    | 19p13.11 | -0.03866 | 0.451229 | 0.55217  |
| OR2J2     | 6p22.1   | 0.038658 | 0.451232 | 0.55217  |
| PPP1R14C  | 6q25.1   | -0.03865 | 0.451357 | 0.55229  |
| PYDC1     | 16p11.2  | 0.038642 | 0.451421 | 0.552335 |
| LINC00310 | 21q22.11 | -0.0386  | 0.451872 | 0.552852 |
| PLAA      | 9p21.2   | 0.0386   | 0.451902 | 0.552856 |
| CCDC3     | 10p13    | 0.038557 | 0.452412 | 0.553446 |
| FAM47E    | 4q21.1   | -0.03855 | 0.452478 | 0.553493 |
| GUCY2D    | 17p13.1  | -0.03854 | 0.452587 | 0.553587 |
| UMOD      | 16p12.3  | -0.03854 | 0.452611 | 0.553587 |
| GPAM      | 10q25.2  | -0.03853 | 0.452749 | 0.553722 |
| PRSS27    | 16p13.3  | 0.03852  | 0.452843 | 0.553804 |
| CIB4      | 2p23.3   | 0.038515 | 0.452902 | 0.553841 |
| CLUL1     | 18p11.32 | 0.038509 | 0.45298  | 0.553904 |
| SLPI      | 20q13.12 | 0.038504 | 0.453037 | 0.553939 |
| PCDH8     | 13q14.3  | -0.0385  | 0.453103 | 0.553986 |
| FAM90A1   | 12p13.31 | 0.038449 | 0.453682 | 0.554629 |
| ZBTB22    | 6p21.32  | 0.038449 | 0.453684 | 0.554629 |
| CNGA2     | Xq28     | -0.03844 | 0.453788 | 0.554722 |
| CSN2      | 4q13.3   | 0.038417 | 0.454052 | 0.555011 |
| LOC391322 | 22q11.23 | -0.0384  | 0.454284 | 0.555259 |
| RNASE8    | 14q11.2  | 0.038395 | 0.454311 | 0.555259 |
| LYPLA1    | 8q11.23  | -0.03838 | 0.454489 | 0.555443 |
| MYT1L-AS1 | 2p25.3   | 0.038372 | 0.454583 | 0.555524 |
| DNAJC21   | 5p13.2   | 0.038361 | 0.454714 | 0.555651 |
| WIPF3     | 7p14.3   | 0.038337 | 0.454992 | 0.555956 |
| HCAR2     | 12q24.31 | 0.038333 | 0.455045 | 0.555976 |
| CTRB1     | 16q23.1  | -0.03833 | 0.455064 | 0.555976 |
| OR1S1     | 11q12.1  | -0.03833 | 0.4551   | 0.555986 |
| RPL36AL   | 14q21.3  | -0.03829 | 0.455518 | 0.556463 |
| PRRT2     | 16p11.2  | 0.038286 | 0.455599 | 0.556512 |
| LINC02800 | 1p36.11  | -0.03828 | 0.455614 | 0.556512 |
| OR2A5     | 7q35     | -0.03827 | 0.455812 | 0.556696 |
| LINC00602 | 6q27     | 0.038267 | 0.455819 | 0.556696 |
| OR12D2    | 6p22.1   | -0.03823 | 0.45624  | 0.557118 |
| ACTRT3    | 3q26.2   | 0.038231 | 0.456241 | 0.557118 |
| GAL3ST3   | 11q13.1  | 0.038231 | 0.456249 | 0.557118 |
| ASIC3     | 7q36.1   | 0.03822  | 0.456376 | 0.55724  |
| ADIG      | 20q11.23 | 0.038209 | 0.456501 | 0.557358 |
| RBMY2EP   | Yq11.223 | -0.03818 | 0.456859 | 0.557761 |
| ANKRD26   | 10p12.1  | 0.038162 | 0.457065 | 0.557978 |
| IL24      | 1q32.1   | -0.03816 | 0.457115 | 0.558001 |
| SLC5A4    | 22q12.3  | -0.03816 | 0.457139 | 0.558001 |
| LINC01205 | 3q13.13  | -0.03813 | 0.45745  | 0.558347 |
| TAF9B     | Xq21.1   | -0.03811 | 0.457663 | 0.558573 |
| ZFP30     | 19q13.12 | -0.0381  | 0.457798 | 0.558703 |
| GDE1      | 16p12.3  | 0.038058 | 0.458289 | 0.559244 |

|            |                     |          |          |          |
|------------|---------------------|----------|----------|----------|
| TYMP       | 22q13.33            | 0.038057 | 0.458297 | 0.559244 |
| TUBA3C     | 13q12.11            | 0.038054 | 0.458332 | 0.559252 |
| MB21D2     | 3q29                | -0.03805 | 0.458409 | 0.559312 |
| HMGB3P1    | 20q11.22            | -0.03804 | 0.458477 | 0.559362 |
| SLC30A3    | 2p23.3              | -0.03802 | 0.458687 | 0.559566 |
| PNLIP      | 10q25.3             | -0.03802 | 0.458701 | 0.559566 |
| GAGE2E     | Xp11.23             | -0.038   | 0.458935 | 0.559818 |
| THOC2      | Xq25                | 0.038    | 0.458976 | 0.559834 |
| ALDH16A1   | 19q13.33            | -0.03799 | 0.459073 | 0.559918 |
| KIF15      | 3p21.31             | -0.03799 | 0.459149 | 0.559952 |
| GPR37      | 7q31.33             | 0.037985 | 0.459157 | 0.559952 |
| RBM45      | 2q31.2              | -0.03797 | 0.459289 | 0.56008  |
| CHIC2      | 4q12                | 0.037951 | 0.459558 | 0.560373 |
| CCDC168    | 13q33.1             | 0.037948 | 0.459591 | 0.560379 |
| NEK6       | 9q33.3              | -0.03793 | 0.459789 | 0.560586 |
| KIF24      | 9p13.3              | 0.037918 | 0.459944 | 0.560742 |
| DGCR2      | 22q11.21            | 0.037878 | 0.460414 | 0.56128  |
| C1ORF112   | 1q24.2              | -0.03787 | 0.460531 | 0.561389 |
| TMIGD2     | 19p13.3             | 0.037848 | 0.460772 | 0.561649 |
| ZFP91-CNTF | 11q12.1             | 0.037837 | 0.460904 | 0.561775 |
| RBP4       | 10q23.33            | 0.037818 | 0.461126 | 0.562011 |
| WNK2       | 9q22.31             | 0.037816 | 0.461159 | 0.562017 |
| NUP88      | 17p13.2             | 0.037805 | 0.461289 | 0.562142 |
| LINC01587  | 4p16.2              | 0.037789 | 0.461469 | 0.562311 |
| BPIFB2     | 20q11.21            | 0.037786 | 0.461508 | 0.562311 |
| KRTAP4-1   | 17q21.2             | 0.037786 | 0.461512 | 0.562311 |
| GUCY2F     | Xq22.3-q23          | -0.03774 | 0.462105 | 0.562982 |
| SKIDA1     | 10p12.31            | 0.037735 | 0.462119 | 0.562982 |
| GPR157     | 1p36.22             | -0.03772 | 0.46226  | 0.563114 |
| OR51F1     | 11p15.4             | 0.037721 | 0.462284 | 0.563114 |
| IQCF5      | 3p21.2              | 0.037714 | 0.462363 | 0.563176 |
| AD11       | 2p25.3              | -0.0377  | 0.462541 | 0.563359 |
| KHDRBS1    | 1p35.2              | 0.037666 | 0.46293  | 0.56378  |
| CTXN1      | 19p13.2             | -0.03767 | 0.462943 | 0.56378  |
| C1ORF53    | 1q31.3              | -0.03766 | 0.462974 | 0.563783 |
| TRAF1      | 9q33.2              | -0.03764 | 0.463227 | 0.564057 |
| IL17RC     | 3p25.3 3p25.3-p24.1 | -0.03763 | 0.463311 | 0.564089 |
| ZNF200     | 16p13.3             | -0.03763 | 0.463316 | 0.564089 |
| RYK        | 3q22.2              | -0.03763 | 0.463355 | 0.564089 |
| MPO        | 17q22               | 0.03763  | 0.463366 | 0.564089 |
| OR10G7     | 11q24.2             | 0.037618 | 0.463507 | 0.564227 |
| PRODH      | 22q11.21            | -0.03761 | 0.463604 | 0.564282 |
| PSORS1C2   | 6p21.33             | -0.03761 | 0.463609 | 0.564282 |
| SMG8       | 17q22               | 0.037596 | 0.46377  | 0.564443 |
| OR7E5P     | 11q12.1             | -0.03758 | 0.463991 | 0.564679 |
| PRAC2      | 17q21.32            | -0.03757 | 0.464097 | 0.564773 |
| ZFR2       | 19p13.3             | 0.037551 | 0.464304 | 0.564991 |
| CCDC82     | 11q21               | 0.037529 | 0.464559 | 0.565266 |
| RELB       | 19q13.32            | 0.037519 | 0.464679 | 0.565379 |
| FAM171A1   | 10p13               | 0.037514 | 0.464743 | 0.565422 |
| IQGAP3     | 1q22                | 0.037494 | 0.464987 | 0.565684 |
| CUTALP     | 9q33.2              | -0.03748 | 0.465126 | 0.565819 |
| TRIM42     | 3q23                | -0.03745 | 0.465482 | 0.566218 |
| LARS2      | 3p21.31             | -0.03744 | 0.465618 | 0.566349 |
| OR52D1     | 11p15.4             | 0.037436 | 0.46567  | 0.566378 |
| CAPN13     | 2p23.1              | -0.03742 | 0.465841 | 0.566551 |
| CELSR2     | 1p13.3              | 0.037404 | 0.466057 | 0.56678  |
| P2RX6P     | 22q11.21            | 0.037399 | 0.466112 | 0.566812 |

|            |               |          |          |          |
|------------|---------------|----------|----------|----------|
| SLC13A5    | 17p13.1       | -0.03739 | 0.466242 | 0.566935 |
| SCRN1      | 7p14.3        | -0.03737 | 0.466432 | 0.567133 |
| ACVR1B     | 12q13.13      | 0.037367 | 0.466497 | 0.567176 |
| CCER1      | 12q21.33      | 0.037346 | 0.466741 | 0.567439 |
| LOC440173  | 9q21.33       | -0.03731 | 0.467164 | 0.567919 |
| UGT1A9     | 2q37.1        | 0.037309 | 0.467194 | 0.567921 |
| FAM86B1    | 8p23.1        | -0.0373  | 0.46734  | 0.568064 |
| OR4N3P     | 15q11.2       | -0.03727 | 0.467617 | 0.568366 |
| KCNC1      | 11p15.1       | 0.037266 | 0.467705 | 0.568439 |
| HNRNPA3    | 2q31.2        | -0.03726 | 0.467767 | 0.568479 |
| SELENOF    | 1p22.3        | -0.03722 | 0.468225 | 0.569001 |
| LZIC       | 1p36.22       | 0.037209 | 0.46838  | 0.569145 |
| ZMYND15    | 17p13.2       | 0.037208 | 0.4684   | 0.569145 |
| C22ORF31   | 22q12.1       | -0.0372  | 0.468521 | 0.569258 |
| SLC8B1     | 12q24.13      | 0.037189 | 0.468624 | 0.569348 |
| IL4        | 5q31.1        | 0.037186 | 0.468656 | 0.569352 |
| MEIOC      | 17q21.31      | -0.03717 | 0.46889  | 0.569602 |
| PADI1      | 1p36.13       | -0.03716 | 0.468931 | 0.569617 |
| ADAM20     | 14q24.2       | -0.03714 | 0.469157 | 0.569858 |
| PRG1       | 19q13.31      | 0.037136 | 0.469253 | 0.569939 |
| ODF2       | 9q34.11       | -0.03712 | 0.469426 | 0.570115 |
| GPR160     | 3q26.2        | -0.03711 | 0.46956  | 0.570243 |
| MBD6       | 12q13.3       | 0.037092 | 0.469779 | 0.570475 |
| TARM1      | 19q13.42      | 0.037088 | 0.46983  | 0.570502 |
| HNRNPA1P33 | 10q11.22      | 0.03707  | 0.470047 | 0.570731 |
| C12ORF43   | 12q24.31      | -0.03705 | 0.470236 | 0.570878 |
| PRLR       | 5p13.2        | 0.037053 | 0.470249 | 0.570878 |
| RAD21      | 8q24.11       | 0.037053 | 0.470254 | 0.570878 |
| GLRA4      | Xq22.2        | 0.037036 | 0.470454 | 0.571087 |
| WSB1       | 17q11.1       | 0.037027 | 0.470566 | 0.571188 |
| ZC3H12B    | Xq11.2-q12    | -0.03702 | 0.470596 | 0.571189 |
| TEX43      | 5q23.2        | -0.03702 | 0.470692 | 0.571271 |
| HIRIP3     | 16p11.2       | 0.03701  | 0.470768 | 0.571328 |
| FAM153B    | 5q35.2        | 0.036996 | 0.470937 | 0.571499 |
| USP17L2    | 8p23.1        | 0.036969 | 0.471264 | 0.571862 |
| REG1B      | 2p12          | 0.036961 | 0.471353 | 0.571935 |
| LMX1B      | 9q33.3        | 0.036955 | 0.471422 | 0.571985 |
| SELENBP1   | 1q21.3        | -0.03694 | 0.471556 | 0.572111 |
| GADL1      | 3p24.1-p23    | -0.03694 | 0.4716   | 0.572131 |
| GSC2       | 22q11.21      | 0.036935 | 0.471673 | 0.572184 |
| TAB3       | Xp21.2        | 0.036925 | 0.471786 | 0.572287 |
| CUEDC1     | 17q22         | 0.036916 | 0.471897 | 0.572387 |
| ABCC11     | 16q12.1       | 0.036897 | 0.472123 | 0.572627 |
| ZNF804B    | 7q21.13       | 0.036887 | 0.47225  | 0.572745 |
| MIR924HG   | 18q12.2-q12.3 | 0.036884 | 0.472282 | 0.57275  |
| RASGRF1    | 15q25.1       | -0.03688 | 0.472375 | 0.572828 |
| CCDC105    | 19p13.12      | -0.03687 | 0.472432 | 0.57284  |
| TAAR8      | 6q23.2        | 0.03687  | 0.472449 | 0.57284  |
| MUC15      | 11p14.2       | -0.03687 | 0.472471 | 0.57284  |
| CCDC151    | 19p13.2       | -0.03686 | 0.472574 | 0.57293  |
| NDFIP1     | 5q31.3        | 0.036852 | 0.47267  | 0.573013 |
| RSPH6A     | 19q13.32      | -0.03684 | 0.472763 | 0.573078 |
| GRM2       | 3p21.2        | 0.036842 | 0.472781 | 0.573078 |
| IFNGR1     | 6q23.3        | 0.036832 | 0.472901 | 0.573188 |
| DPP4       | 2q24.2        | -0.03683 | 0.472981 | 0.573247 |
| FHDC1      | 4q31.3        | 0.036824 | 0.473007 | 0.573247 |
| MMP23B     | 1p36.33       | -0.03681 | 0.473153 | 0.57339  |
| ADM5       | 19q13.33      | -0.0368  | 0.473327 | 0.573565 |



|          |                |          |          |          |
|----------|----------------|----------|----------|----------|
| AVEN     | 15q14          | 0.036793 | 0.473372 | 0.573586 |
| EFHB     | 3p24.3         | 0.036787 | 0.473448 | 0.573643 |
| NUP62    | 19q13.33       | 0.036771 | 0.473644 | 0.573846 |
| RASA4    | 7q22.1         | 0.036761 | 0.473756 | 0.573946 |
| OR51F2   | 11p15.4        | 0.036737 | 0.474054 | 0.574263 |
| CPT1A    | 11q13.3        | 0.036735 | 0.474074 | 0.574263 |
| OR2J3    | 6p22.1         | 0.036701 | 0.474484 | 0.574725 |
| FABP9    | 8q21.13        | 0.036698 | 0.474521 | 0.574734 |
| AMDHD1   | 12q23.1        | -0.03669 | 0.474594 | 0.574787 |
| GCFC2    | 2p12           | -0.03669 | 0.474658 | 0.574805 |
| SCGB1D1  | 11q12.3        | -0.03668 | 0.474687 | 0.574805 |
| MTMR8    | Xq11.2         | -0.03668 | 0.474694 | 0.574805 |
| MAT1A    | 10q22.3        | -0.03668 | 0.474771 | 0.574863 |
| TRIM75P  | 4q32.3         | -0.03667 | 0.47483  | 0.574873 |
| AQP5     | 12q13.12       | 0.03667  | 0.474861 | 0.574873 |
| C4ORF50  | 4p16.1         | 0.036669 | 0.474865 | 0.574873 |
| MT1IP    | 16q13          | -0.03665 | 0.475137 | 0.575167 |
| CHN1     | 2q31.1         | 0.036643 | 0.475179 | 0.575184 |
| OR52W1   | 11p15.4        | -0.03661 | 0.475557 | 0.575606 |
| CAPZA3   | 12p12.3        | 0.036603 | 0.475666 | 0.575693 |
| IL36A    | 2q14.1         | -0.0366  | 0.475686 | 0.575693 |
| RPP14    | 3p14.3         | 0.036597 | 0.47574  | 0.575724 |
| AURKC    | 19q13.43       | -0.03658 | 0.475927 | 0.575915 |
| TPTE2P6  | 13q12.12       | -0.03657 | 0.476019 | 0.575991 |
| CNGB3    | 8q21.3         | 0.03656  | 0.476179 | 0.57615  |
| SLC10A4  | 4p11           | -0.03656 | 0.476224 | 0.57617  |
| WFDC3    | 20q13.12       | -0.03655 | 0.476268 | 0.576188 |
| CMBL     | 5p15.2         | 0.036545 | 0.476369 | 0.576276 |
| ZNF490   | 19p13.2-p13.13 | -0.03652 | 0.476635 | 0.576563 |
| KCNA10   | 1p13.3         | 0.036505 | 0.476845 | 0.576781 |
| C17ORF50 | 17q12          | 0.036502 | 0.476883 | 0.576793 |
| ELOVL7   | 5q12.1         | 0.036498 | 0.476928 | 0.576812 |
| REN      | 1q32.1         | -0.03649 | 0.476983 | 0.576844 |
| FBXW10   | 17p11.2        | 0.036487 | 0.477067 | 0.576911 |
| SMIM6    | 17q25.1        | 0.036472 | 0.477251 | 0.577098 |
| NCAPH    | 2q11.2         | -0.03646 | 0.477396 | 0.577239 |
| MLIP     | 6p12.1         | 0.036434 | 0.477709 | 0.577582 |
| PPM1M    | 3p21.2         | 0.036419 | 0.477891 | 0.577768 |
| TTC8     | 14q31.3        | -0.03641 | 0.477948 | 0.577802 |
| OR10W1   | 11q12.1        | -0.03641 | 0.478003 | 0.577833 |
| BORCS6   | 17p13.1        | 0.036405 | 0.478058 | 0.577864 |
| METTL21C | 13q33.1        | 0.036395 | 0.478181 | 0.577978 |
| SOST     | 17q21.31       | 0.03638  | 0.478361 | 0.578161 |
| SLF1     | 5q15           | 0.036375 | 0.478425 | 0.578204 |
| RS1      | Xp22.13        | -0.03637 | 0.478467 | 0.57822  |
| FAM170A  | 5q23.1         | 0.036312 | 0.479188 | 0.579056 |
| KCNH5    | 14q23.2        | -0.03631 | 0.47923  | 0.579072 |
| SMU1     | 9p21.1         | -0.03629 | 0.479405 | 0.579249 |
| CT45A2   | Xq26.3         | -0.03628 | 0.479612 | 0.579454 |
| GPR45    | 2q12.1         | -0.03627 | 0.479633 | 0.579454 |
| HIGD2B   | 15q24.1        | -0.03626 | 0.479872 | 0.579707 |
| IGFBP1   | 7p12.3         | -0.03624 | 0.48001  | 0.57984  |
| KLK9     | 19q13.41       | -0.03623 | 0.480188 | 0.58002  |
| POTEH    | 22q11.1        | -0.03622 | 0.480247 | 0.580056 |
| TAAR1    | 6q23.2         | 0.036211 | 0.48041  | 0.580217 |
| PANK1    | 10q23.31       | -0.03619 | 0.4806   | 0.580413 |
| CABP1    | 12q24.31       | -0.03619 | 0.480681 | 0.580475 |
| ASCC2    | 22q12.2        | -0.03618 | 0.480739 | 0.58051  |

|            |          |          |          |          |
|------------|----------|----------|----------|----------|
| KRTAP5-9   | 11q13.4  | -0.03617 | 0.4809   | 0.58067  |
| ZCCHC13    | Xq13.2   | 0.036154 | 0.481103 | 0.580879 |
| VGLL1      | Xq26.3   | 0.036144 | 0.481215 | 0.58098  |
| OR6M1      | 11q24.1  | 0.03614  | 0.481264 | 0.581004 |
| EXOC4      | 7q33     | -0.03612 | 0.481473 | 0.581221 |
| PRSS55     | 8p23.1   | -0.03612 | 0.481503 | 0.581222 |
| GABRR1     | 6q15     | -0.03612 | 0.481561 | 0.581231 |
| BTF3P11    | 13q22.3  | -0.03612 | 0.481569 | 0.581231 |
| BCAS2      | 1p13.2   | -0.03611 | 0.481622 | 0.581261 |
| EML3       | 11q12.3  | -0.0361  | 0.481706 | 0.581327 |
| SERPINA13P | 14q32.13 | -0.0361  | 0.481765 | 0.581357 |
| TTC23L     | 5p13.2   | -0.0361  | 0.481791 | 0.581357 |
| CALN1      | 7q11.22  | 0.036095 | 0.481818 | 0.581357 |
| HGC6.3     | 6q27     | -0.03609 | 0.481894 | 0.581409 |
| SNORA14A   | 7q11.23  | -0.03609 | 0.481919 | 0.581409 |
| S100P      | 4p16.1   | -0.03607 | 0.48214  | 0.581621 |
| KNDC1      | 10q26.3  | -0.03607 | 0.482173 | 0.581621 |
| ANKEF1     | 20p12.2  | 0.036065 | 0.482182 | 0.581621 |
| MCOLN1     | 19p13.2  | -0.03603 | 0.482637 | 0.582135 |
| KIR3DL1    | 19q13.42 | 0.036021 | 0.482715 | 0.582194 |
| HHLA1      | 8q24.22  | -0.03601 | 0.482805 | 0.582244 |
| PSG8       | 19q13.2  | -0.03601 | 0.482814 | 0.582244 |
| PDGFB      | 22q13.1  | 0.03599  | 0.483096 | 0.582548 |
| ZNF43      | 19p12    | -0.03598 | 0.483192 | 0.582626 |
| CT45A4     | Xq26.3   | -0.03598 | 0.483226 | 0.582626 |
| HSD17B14   | 19q13.33 | 0.035977 | 0.483247 | 0.582626 |
| AADAC      | 3q25.1   | -0.03597 | 0.483277 | 0.582626 |
| CCDC30     | 1p34.2   | -0.03596 | 0.48347  | 0.582824 |
| LOC440896  | 9p11.2   | -0.03594 | 0.483693 | 0.583031 |
| GPC5       | 13q31.3  | 0.03594  | 0.4837   | 0.583031 |
| PPDPFL     | 8q11.21  | -0.03592 | 0.483953 | 0.583252 |
| SPATA31D5P | 9q21.32  | -0.03592 | 0.483956 | 0.583252 |
| TCEA1      | 8q11.23  | -0.03592 | 0.483976 | 0.583252 |
| NRARP      | 9q34.3   | 0.035915 | 0.484    | 0.583252 |
| ST3GAL2    | 16q22.1  | -0.03588 | 0.484388 | 0.583684 |
| RSU1       | 10p13    | 0.035871 | 0.484535 | 0.583826 |
| ACTB       | 7p22.1   | 0.035869 | 0.484563 | 0.583826 |
| DMTN       | 8p21.3   | 0.035851 | 0.484786 | 0.584059 |
| AOX2P      | 2q33.1   | 0.035822 | 0.485132 | 0.584441 |
| C2ORF80    | 2q33.3   | 0.03581  | 0.485279 | 0.584582 |
| TMEM14EP   | 3q25.2   | -0.0358  | 0.485422 | 0.58472  |
| OR2T11     | 1q44     | -0.03579 | 0.485574 | 0.584868 |
| GAD1       | 2q31.1   | -0.03571 | 0.486465 | 0.585906 |
| TG         | 8q24.22  | -0.0357  | 0.486686 | 0.586136 |
| C5ORF60    | 5q35.3   | -0.03569 | 0.486744 | 0.586171 |
| LINC00934  | 12q24.23 | 0.035684 | 0.486827 | 0.586236 |
| IGSF9      | 1q23.2   | -0.03568 | 0.48688  | 0.586265 |
| SOCS3      | 17q25.3  | 0.035666 | 0.487043 | 0.586426 |
| BIN3-IT1   | 8p21.3   | 0.035655 | 0.487175 | 0.586549 |
| ZG16B      | 16p13.3  | 0.035647 | 0.487275 | 0.586634 |
| LCTL       | 15q22.31 | 0.035642 | 0.487339 | 0.586649 |
| SLC35G3    | 17q12    | 0.035641 | 0.487346 | 0.586649 |
| PADI3      | 1p36.13  | 0.035632 | 0.487453 | 0.586743 |
| MMD2       | 7p22.1   | -0.03558 | 0.488147 | 0.587542 |
| RRAGB      | Xp11.21  | 0.035566 | 0.488267 | 0.587632 |
| CNTN6      | 3p26.3   | 0.035563 | 0.488297 | 0.587632 |
| PNMA5      | Xq28     | 0.035562 | 0.48831  | 0.587632 |
| ZNF675     | 19p12    | 0.035555 | 0.488399 | 0.587705 |

|              |               |          |          |          |
|--------------|---------------|----------|----------|----------|
| FAM174A      | 5q21.1        | 0.035544 | 0.488539 | 0.587837 |
| KRTAP26-1    | 21q22.11      | -0.03554 | 0.488572 | 0.587842 |
| CCDC42       | 17p13.1       | -0.03553 | 0.488711 | 0.587973 |
| DNALI1       | 1p34.3        | 0.035515 | 0.488892 | 0.588156 |
| CHPF2        | 7q36.1        | -0.03551 | 0.488953 | 0.588194 |
| LOC100240734 | 12q13.13      | 0.035504 | 0.489025 | 0.588222 |
| LINC00526    | 18p11.31      | -0.0355  | 0.489034 | 0.588222 |
| PLCZ1        | 12p12.3       | 0.035495 | 0.489136 | 0.588309 |
| PTMS         | 12p13.31      | -0.03548 | 0.489298 | 0.588468 |
| KIF4A        | Xq13.1        | -0.03547 | 0.489385 | 0.588521 |
| ZNF181       | 19q13.11      | 0.035472 | 0.489411 | 0.588521 |
| TVP23A       | 16p13.13      | -0.03547 | 0.48943  | 0.588521 |
| ZNF697       | 1p12          | 0.035465 | 0.489501 | 0.588571 |
| ANKRD20A4    | 9q13          | 0.035462 | 0.489537 | 0.588579 |
| FDPS         | 1q22          | 0.035451 | 0.48967  | 0.588703 |
| UTP15        | 5q13.2        | -0.03544 | 0.48981  | 0.588801 |
| ATG5         | 6q21          | -0.03544 | 0.48981  | 0.588801 |
| SLC39A14     | 8p21.3        | 0.035412 | 0.490155 | 0.589181 |
| ORC2         | 2q33.1        | -0.03539 | 0.490372 | 0.589406 |
| C19ORF33     | 19q13.2       | -0.03538 | 0.490509 | 0.589535 |
| FOXH1        | 8q24.3        | -0.03537 | 0.490647 | 0.589665 |
| CNTFR-AS1    | 9p13.3        | -0.03534 | 0.490997 | 0.590051 |
| MAGEB10      | Xp21.3        | 0.035334 | 0.49111  | 0.590151 |
| DEFB125      | 20p13         | -0.03533 | 0.491142 | 0.590155 |
| STAMBPL1     | 10q23.31      | -0.03533 | 0.491188 | 0.590174 |
| OR4K15       | 14q11.2       | -0.03531 | 0.491406 | 0.5904   |
| ESRRG        | 1q41          | -0.0353  | 0.491471 | 0.590411 |
| ZAN          | 7q22.1        | 0.035304 | 0.491474 | 0.590411 |
| RANBP3L      | 5p13.2        | 0.035292 | 0.491628 | 0.590561 |
| RXFP4        | 1q22          | -0.03529 | 0.491686 | 0.590596 |
| ATP6V1G3     | 1q31.3        | -0.03528 | 0.491819 | 0.59072  |
| EN2          | 7q36.3        | -0.03527 | 0.491943 | 0.590833 |
| RAD1         | 5p13.2        | -0.03526 | 0.49205  | 0.590926 |
| PLGLA        | 2q12.2        | 0.035247 | 0.492172 | 0.591037 |
| SSMEM1       | 7q32.2        | -0.03524 | 0.492211 | 0.591048 |
| OR4X2        | 11p11.2       | 0.035231 | 0.492378 | 0.591214 |
| ZMAT2        | 5q31.3        | -0.03522 | 0.492521 | 0.59135  |
| CASP2        | 7q34          | 0.035201 | 0.492735 | 0.59154  |
| SLC9A7       | Xp11.3 Xp11.3 | 0.035201 | 0.492738 | 0.59154  |
| IMP3         | 15q24.2       | -0.03518 | 0.493032 | 0.591857 |
| PATL1        | 11q12.1       | 0.035172 | 0.493103 | 0.591907 |
| PRAMEF11     | 1p36.21       | -0.03514 | 0.493512 | 0.592363 |
| OTOF         | 2p23.3        | -0.03512 | 0.493705 | 0.592558 |
| DAD1         | 14q11.2       | -0.0351  | 0.493988 | 0.59283  |
| APCS         | 1q23.2        | -0.0351  | 0.49399  | 0.59283  |
| GLB1         | 3p22.3        | 0.035097 | 0.494023 | 0.592833 |
| ACSM2A       | 16p12.3       | 0.035094 | 0.494058 | 0.59284  |
| TMEM174      | 5q13.2        | 0.035071 | 0.494335 | 0.593137 |
| WARS2        | 1p12          | -0.03506 | 0.494524 | 0.593328 |
| RNASE7       | 14q11.2       | -0.03505 | 0.494641 | 0.593432 |
| TGIF2LX      | Xq21.31       | 0.03504  | 0.494724 | 0.593496 |
| ECD          | 10q22.2       | 0.035037 | 0.494763 | 0.593508 |
| ACTG1P4      | 1p21.1        | -0.03501 | 0.495094 | 0.59387  |
| SCGB1D2      | 11q12.3       | 0.035003 | 0.495184 | 0.593942 |
| UNG          | 12q24.11      | -0.035   | 0.495214 | 0.593942 |
| FERD3L       | 7p21.1        | 0.034992 | 0.495317 | 0.59403  |
| PTBP1        | 19p13.3       | -0.03497 | 0.495556 | 0.594282 |
| GABRR3       | 3q11.2        | 0.034964 | 0.495659 | 0.59437  |

|              |          |          |          |          |
|--------------|----------|----------|----------|----------|
| SNN          | 16p13.13 | 0.034935 | 0.496024 | 0.594761 |
| AADACP1      | 3q25.1   | -0.03493 | 0.496045 | 0.594761 |
| C8ORF58      | 8p21.3   | 0.034926 | 0.496135 | 0.594834 |
| ZNF492       | 19p12    | 0.034913 | 0.496284 | 0.594976 |
| ZNF155       | 19q13.31 | 0.034904 | 0.496406 | 0.595087 |
| PPP3CC       | 8p21.3   | 0.034862 | 0.496917 | 0.595663 |
| PHF10        | 6q27     | -0.03485 | 0.497026 | 0.595758 |
| PPP1CC       | 12q24.11 | -0.03484 | 0.497198 | 0.595904 |
| CFAP77       | 9q34.13  | 0.034839 | 0.497207 | 0.595904 |
| C16ORF87     | 16q11.2  | 0.034825 | 0.497371 | 0.596066 |
| TMPRSS15     | 21q21.1  | 0.034815 | 0.497502 | 0.596186 |
| PPP1R42      | 8q13.1   | 0.034806 | 0.497616 | 0.596288 |
| PM20D2       | 6q15     | -0.03479 | 0.497856 | 0.596539 |
| ANXA2P3      | 10q21.3  | 0.034783 | 0.497893 | 0.596548 |
| NOTO         | 2p13.2   | 0.034753 | 0.498268 | 0.596962 |
| HRNR         | 1q21.3   | 0.034717 | 0.498709 | 0.597454 |
| IGFBP6       | 12q13.13 | 0.034709 | 0.498814 | 0.597545 |
| SLC7A8       | 14q11.2  | 0.034704 | 0.498873 | 0.597553 |
| SNORA1       | 11q21    | 0.034703 | 0.498881 | 0.597553 |
| UGT2B4       | 4q13.3   | 0.034689 | 0.499059 | 0.597731 |
| RNF135       | 17q11.2  | 0.034687 | 0.499089 | 0.597731 |
| LGALS3BP     | 17q25.3  | 0.034682 | 0.499142 | 0.597759 |
| DDX42        | 17q23.3  | 0.03466  | 0.499419 | 0.598055 |
| MSMO1        | 4q32.3   | -0.03465 | 0.499579 | 0.598211 |
| C12ORF50     | 12q21.32 | -0.03464 | 0.499711 | 0.598333 |
| NF1P2        | 15q11.2  | -0.03461 | 0.500016 | 0.598484 |
| LOC100287704 | 7q11.21  | -0.03461 | 0.500016 | 0.598484 |
| OR52E6       | 11p15.4  | -0.03461 | 0.500016 | 0.598484 |
| OR51B6       | 11p15.4  | -0.03461 | 0.500016 | 0.598484 |
| POM121L12    | 7p12.1   | -0.03461 | 0.500016 | 0.598484 |
| TNP1         | 2q35     | -0.03461 | 0.500016 | 0.598484 |
| SFXN3        | 10q24.31 | 0.034589 | 0.500297 | 0.598784 |
| TBC1D21      | 15q24.1  | 0.034559 | 0.500665 | 0.599189 |
| ZNF883       | 9q32     | 0.034543 | 0.500871 | 0.599391 |
| SSX6P        | Xp11.23  | -0.03454 | 0.500906 | 0.599391 |
| PPIL2        | 22q11.21 | -0.03454 | 0.500924 | 0.599391 |
| BHLHB9       | Xq22.1   | 0.034533 | 0.500994 | 0.599438 |
| CEACAM8      | 19q13.2  | 0.034527 | 0.501066 | 0.59949  |
| GABBR1       | 6p22.1   | -0.03452 | 0.501178 | 0.599587 |
| ADGRV1       | 5q14.3   | 0.034512 | 0.501249 | 0.599637 |
| SRSF12       | 6q15     | 0.034492 | 0.501496 | 0.599896 |
| TMEM185B     | 2q14.2   | -0.03448 | 0.501643 | 0.600036 |
| ABRAXAS1     | 4q21.23  | -0.03448 | 0.501704 | 0.600074 |
| RHBDF1       | 16p13.3  | -0.03446 | 0.501851 | 0.600214 |
| GLOD4        | 17p13.3  | 0.034439 | 0.502164 | 0.600552 |
| KIR3DP1      | 19q13.42 | 0.034433 | 0.502238 | 0.600604 |
| PRF1         | 10q22.1  | -0.03442 | 0.502456 | 0.600829 |
| C7ORF71      | 7p15.2   | 0.034397 | 0.502682 | 0.601063 |
| CCDC140      | 2q36.1   | -0.03438 | 0.502896 | 0.601283 |
| RAMP3        | 7p13     | -0.03437 | 0.502969 | 0.601312 |
| SNTN         | 3p14.2   | 0.034373 | 0.50298  | 0.601312 |
| ZNF610       | 19q13.41 | 0.034367 | 0.50305  | 0.601359 |
| ACRV1        | 11q24.2  | -0.03436 | 0.50311  | 0.601396 |
| NEK2         | 1q32.3   | -0.03435 | 0.503248 | 0.601524 |
| MFAP2        | 1p36.13  | -0.03435 | 0.503304 | 0.601556 |
| NPFFR2       | 4q13.3   | 0.034326 | 0.503568 | 0.601835 |
| EHMT1-IT1    | 9q34.3   | -0.03428 | 0.504126 | 0.602456 |
| SPDYE3       | 7q22.1   | -0.03428 | 0.504147 | 0.602456 |

|           |          |          |          |          |
|-----------|----------|----------|----------|----------|
| OR2A12    | 7q35     | -0.03426 | 0.504433 | 0.602761 |
| SFRP5     | 10q24.2  | -0.0342  | 0.505177 | 0.603614 |
| BEGAIN    | 14q32.2  | 0.034174 | 0.505456 | 0.603911 |
| BBS9      | 7p14.3   | 0.034165 | 0.505569 | 0.60401  |
| VEGFD     | Xp22.2   | -0.03415 | 0.505758 | 0.6042   |
| MYB       | 6q23.3   | 0.034137 | 0.505915 | 0.604352 |
| MCM6      | 2q21.3   | -0.03411 | 0.506269 | 0.604739 |
| NEUROD6   | 7p14.3   | -0.0341  | 0.506341 | 0.604762 |
| BCORP1    | Yq11.222 | -0.0341  | 0.506349 | 0.604762 |
| UFSP2     | 4q35.1   | 0.034086 | 0.506549 | 0.604943 |
| GPR6      | 6q21     | -0.03409 | 0.506561 | 0.604943 |
| PPFIA4    | 1q32.1   | 0.034059 | 0.506892 | 0.605303 |
| GYS1      | 19q13.33 | 0.034056 | 0.50693  | 0.605312 |
| MAN2C1    | 15q24.2  | -0.03405 | 0.507064 | 0.605409 |
| EVX1      | 7p15.2   | 0.034044 | 0.507072 | 0.605409 |
| NKAIN4    | 20q13.33 | 0.034019 | 0.507389 | 0.605752 |
| CRYGC     | 2q33.3   | -0.03402 | 0.507431 | 0.605765 |
| SPDYE4    | 17p13.1  | 0.034012 | 0.507477 | 0.605784 |
| IFNA8     | 9p21.3   | 0.034002 | 0.507599 | 0.605893 |
| TMEM40    | 3p25.2   | -0.034   | 0.507655 | 0.605924 |
| FAM183BP  | 7p14.1   | 0.033992 | 0.507722 | 0.605969 |
| ZMYM1     | 1p34.3   | 0.03398  | 0.507874 | 0.6061   |
| RALGPS1   | 9q33.3   | -0.03398 | 0.507892 | 0.6061   |
| LINC01600 | 6p25.2   | 0.033975 | 0.507943 | 0.606124 |
| CD83      | 6p23     | 0.033966 | 0.508057 | 0.606223 |
| PTPN20    | 10q11.22 | 0.033947 | 0.508293 | 0.606469 |
| WBP11     | 12p12.3  | 0.033944 | 0.508323 | 0.606469 |
| TDRD6     | 6p12.3   | 0.033938 | 0.508398 | 0.606521 |
| TMEM79    | 1q22     | 0.033935 | 0.508444 | 0.606521 |
| USP7      | 16p13.2  | 0.033934 | 0.508457 | 0.606521 |
| HIST1H4H  | 6p22.2   | -0.03393 | 0.50849  | 0.606523 |
| PZP       | 12p13.31 | -0.03393 | 0.508558 | 0.606568 |
| AKAP1     | 17q22    | -0.03389 | 0.509023 | 0.607087 |
| MC1R      | 16q24.3  | 0.033875 | 0.509195 | 0.607256 |
| KCNH4     | 17q21.2  | 0.033856 | 0.509427 | 0.607496 |
| SILC1     | 2p25.2   | 0.033843 | 0.509594 | 0.607639 |
| C2ORF70   | 2p23.3   | -0.03384 | 0.509607 | 0.607639 |
| MIEF2     | 17p11.2  | -0.03383 | 0.509729 | 0.607748 |
| TUBA3FP   | 22q11.21 | 0.033821 | 0.50986  | 0.607868 |
| GJA4      | 1p34.3   | -0.03382 | 0.509898 | 0.607877 |
| HIST4H4   | 12p12.3  | -0.03382 | 0.509928 | 0.607877 |
| HFM1      | 1p22.2   | 0.033794 | 0.510209 | 0.608175 |
| SERTAD1   | 19q13.2  | -0.03379 | 0.510279 | 0.608222 |
| SNORA69   | Xq24     | 0.033743 | 0.510847 | 0.608864 |
| VPS52     | 6p21.32  | -0.03373 | 0.510997 | 0.609006 |
| OR2A25    | 7q35     | -0.03372 | 0.511104 | 0.609097 |
| OR51L1    | 11p15.4  | -0.03368 | 0.511601 | 0.609653 |
| AP2A2     | 11p15.5  | -0.03367 | 0.511728 | 0.609747 |
| LINC02685 | 11p11.2  | 0.033671 | 0.511742 | 0.609747 |
| INHBB     | 2q14.2   | -0.03367 | 0.511771 | 0.609747 |
| KRTAP4-11 | 17q21.2  | -0.03366 | 0.511923 | 0.609892 |
| CRY1      | 12q23.3  | 0.033627 | 0.512292 | 0.610295 |
| OR52B2    | 11p15.4  | -0.03362 | 0.512399 | 0.610386 |
| SPIN4     | Xq11.1   | 0.033615 | 0.512449 | 0.610409 |
| ZNF324    | 19q13.43 | 0.033603 | 0.512595 | 0.610547 |
| ZNF253    | 19p13.11 | 0.033585 | 0.512827 | 0.610787 |
| ABCC5     | 3q27.1   | -0.03358 | 0.512887 | 0.610822 |
| MTA3      | 2p21     | -0.03357 | 0.512983 | 0.610865 |

|              |                |          |          |          |
|--------------|----------------|----------|----------|----------|
| RAD50        | 5q31.1         | 0.033572 | 0.512984 | 0.610865 |
| LOC100133050 | 5q21.1         | 0.03355  | 0.513261 | 0.611159 |
| LINC00632    | Xq27.1         | 0.03354  | 0.513393 | 0.61128  |
| APOF         | 12q13.3        | 0.033501 | 0.513874 | 0.611783 |
| FBXL18       | 7p22.1         | -0.0335  | 0.513877 | 0.611783 |
| KHDC3L       | 6q13           | 0.033478 | 0.514168 | 0.612094 |
| UBFD1        | 16p12.2        | -0.03347 | 0.514296 | 0.612181 |
| GATA4        | 8p23.1         | 0.033467 | 0.514306 | 0.612181 |
| GAGE4        | Xp11.4-p11.2   | -0.03346 | 0.514334 | 0.612181 |
| RASGEF1A     | 10q11.21       | -0.03346 | 0.514386 | 0.612207 |
| MRPL42       | 12q22          | -0.03344 | 0.514635 | 0.612467 |
| LAPTM4A      | 2p24.1         | 0.033433 | 0.51473  | 0.612536 |
| PCP4         | 21q22.2        | -0.03343 | 0.514754 | 0.612536 |
| PER4         | 7p21.3         | 0.033423 | 0.514856 | 0.612621 |
| CALCOCO2     | 17q21.32       | 0.033414 | 0.514971 | 0.612721 |
| ERICH1       | 8p23.3         | 0.033394 | 0.515225 | 0.612987 |
| TRPM5        | 11p15.5        | 0.033381 | 0.515394 | 0.613152 |
| KIR2DL4      | 19q13.42       | 0.033377 | 0.515446 | 0.613177 |
| CRIP3        | 6p21.1         | -0.03336 | 0.515592 | 0.613293 |
| SCART1       | 10q26.3        | -0.03336 | 0.515605 | 0.613293 |
| ZBTB9        | 6p21.32        | -0.03331 | 0.516253 | 0.614028 |
| PABPN1L      | 16q24.3        | -0.03331 | 0.516294 | 0.61404  |
| TOX3         | 16q12.1        | 0.033306 | 0.516337 | 0.614055 |
| FOXG1        | 14q12          | -0.03329 | 0.516512 | 0.614217 |
| LYZL2        | 10p11.23       | -0.03329 | 0.516534 | 0.614217 |
| VWDE         | 7p21.3         | -0.03328 | 0.516635 | 0.614299 |
| IL36RN       | 2q14.1         | 0.033271 | 0.516774 | 0.614429 |
| NXNL2        | 9q22.1         | -0.03326 | 0.516894 | 0.614528 |
| TDRKH        | 1q21.3         | 0.03326  | 0.516919 | 0.614528 |
| PXYLP1       | 3q23           | 0.033254 | 0.516994 | 0.61458  |
| RGS17        | 6q25.2         | 0.033247 | 0.517081 | 0.614647 |
| PLPPR2       | 19p13.2        | -0.03323 | 0.517246 | 0.614792 |
| ZNF829       | 19q13.12       | 0.033232 | 0.517264 | 0.614792 |
| GMPR         | 6p22.3         | 0.033229 | 0.517306 | 0.614805 |
| LOC154449    | 6q27           | 0.033199 | 0.517688 | 0.615223 |
| LTB4R2       | 14q12          | -0.0332  | 0.517722 | 0.615226 |
| GABRA1       | 5q34           | 0.033191 | 0.517783 | 0.615227 |
| FUZ          | 19q13.33       | -0.03319 | 0.517811 | 0.615227 |
| CEBPZ        | 2p22.2         | 0.033186 | 0.517844 | 0.615227 |
| GAGE1        | Xp11.23        | -0.03319 | 0.517845 | 0.615227 |
| ARL17B       | 17q21.31       | 0.033178 | 0.517945 | 0.61531  |
| KCNH6        | 17q23.3        | 0.033147 | 0.518343 | 0.615746 |
| OR4F21       | 8p23.3         | 0.033142 | 0.518405 | 0.615782 |
| ESRG         | 3p14.3 3p14.3  | -0.03313 | 0.518565 | 0.615937 |
| MDM4         | 1q32.1         | -0.03312 | 0.518697 | 0.616057 |
| UCHL1        | 4p13           | 0.033112 | 0.518784 | 0.616124 |
| UBA3         | 3p14.1         | 0.033078 | 0.519206 | 0.616588 |
| TRIM39       | 6p22.1         | -0.03307 | 0.519255 | 0.616609 |
| BCAM         | 19q13.32       | -0.03307 | 0.519339 | 0.616673 |
| SAMD12       | 8q24.11-q24.12 | 0.033063 | 0.519396 | 0.616704 |
| DPY19L2      | 12q14.2        | 0.033059 | 0.519454 | 0.616736 |
| SLC7A1       | 13q12.3        | -0.03302 | 0.520006 | 0.617355 |
| C2CD4D       | 1q21.3         | -0.03301 | 0.520092 | 0.61742  |
| RIMS4        | 20q13.12       | -0.033   | 0.520242 | 0.617562 |
| MRPL35       | 2p11.2         | 0.032991 | 0.520311 | 0.617607 |
| CDHR4        | 3p21.31        | 0.032987 | 0.520359 | 0.617628 |
| NINJ2        | 12p13.33       | 0.032981 | 0.520434 | 0.61768  |
| LPCAT1       | 5p15.33        | -0.03296 | 0.520728 | 0.617992 |

|            |          |          |          |          |
|------------|----------|----------|----------|----------|
| FLJ34503   | 6q21     | 0.032951 | 0.520815 | 0.618059 |
| C10ORF131  | 10q24.1  | -0.03292 | 0.521151 | 0.618421 |
| INPP5B     | 1p34.3   | -0.03292 | 0.521221 | 0.618468 |
| EQTN       | 9p21.2   | -0.03285 | 0.522133 | 0.619513 |
| KRTAP10-12 | 21q22.3  | -0.03283 | 0.52235  | 0.619702 |
| OR6C75     | 12q13.2  | 0.03283  | 0.522354 | 0.619702 |
| CYP21A2    | 6p21.33  | 0.032798 | 0.522752 | 0.620136 |
| PRPSAP1    | 17q25.1  | -0.03279 | 0.522891 | 0.620265 |
| TBX18      | 6q14.3   | 0.03277  | 0.523107 | 0.620484 |
| SLC25A18   | 22q11.21 | -0.03276 | 0.523298 | 0.620674 |
| LIN7A      | 12q21.31 | -0.03274 | 0.523431 | 0.620765 |
| ANKRD2     | 10q24.2  | 0.032743 | 0.523452 | 0.620765 |
| EAF2       | 3q13.33  | 0.032742 | 0.523467 | 0.620765 |
| COA7       | 1p32.3   | -0.03271 | 0.523853 | 0.621185 |
| C17ORF77   | 17q25.1  | -0.03269 | 0.524173 | 0.621528 |
| TPTEP2     | 22q13.1  | 0.032641 | 0.524755 | 0.622181 |
| LIN28A     | 1p36.11  | 0.032632 | 0.524858 | 0.622266 |
| HERC2P4    | 16p11.2  | 0.032621 | 0.524998 | 0.622396 |
| BFSP1      | 20p12.1  | 0.03261  | 0.525143 | 0.622495 |
| ADAM32     | 8p11.22  | 0.032608 | 0.52517  | 0.622495 |
| C10ORF55   | 10q22.2  | -0.03261 | 0.525175 | 0.622495 |
| ACKR3      | 2q37.3   | 0.032581 | 0.525507 | 0.622845 |
| EPN3       | 17q21.33 | -0.03258 | 0.525532 | 0.622845 |
| ZPBP2      | 17q21.1  | -0.03256 | 0.525742 | 0.623021 |
| TRDN       | 6q22.31  | -0.03256 | 0.525743 | 0.623021 |
| TMEM260    | 14q22.3  | -0.03256 | 0.525776 | 0.623023 |
| TMEM88     | 17p13.1  | -0.03255 | 0.525918 | 0.623155 |
| PSKH1      | 16q22.1  | -0.03253 | 0.526162 | 0.623407 |
| ZNF416     | 19q13.43 | 0.032524 | 0.526241 | 0.623464 |
| ZNF322     | 6p22.2   | 0.032519 | 0.526299 | 0.623495 |
| MYMK       | 9q34.2   | -0.03251 | 0.526401 | 0.623564 |
| OR2AG2     | 11p15.4  | 0.03251  | 0.526419 | 0.623564 |
| SPATA31A1  | 9p12     | -0.0325  | 0.526574 | 0.623711 |
| IFIT1B     | 10q23.31 | 0.03249  | 0.526676 | 0.623795 |
| CLEC3B     | 3p21.31  | 0.032455 | 0.527116 | 0.624261 |
| CNNM3      | 2q11.2   | -0.03245 | 0.527132 | 0.624261 |
| E2F3       | 6p22.3   | 0.032447 | 0.527217 | 0.624325 |
| LEMD1      | 1q32.1   | 0.032443 | 0.527264 | 0.624343 |
| TEKT1      | 17p13.1  | -0.03244 | 0.527355 | 0.624414 |
| C1ORF189   | 1q21.3   | -0.03242 | 0.527528 | 0.624582 |
| KRT85      | 12q13.13 | 0.032408 | 0.527718 | 0.62477  |
| ANKRD36B   | 2q11.2   | 0.032396 | 0.52787  | 0.624913 |
| ENOSF1     | 18p11.32 | -0.03236 | 0.528315 | 0.625402 |
| TMEM25     | 11q23.3  | 0.032357 | 0.52836  | 0.625419 |
| DLAT       | 11q23.1  | 0.032338 | 0.528606 | 0.625673 |
| PAX3       | 2q36.1   | -0.03231 | 0.529021 | 0.626125 |
| HLA-C      | 6p21.33  | -0.0323  | 0.52905  | 0.626125 |
| MDK        | 11p11.2  | -0.03229 | 0.52916  | 0.626218 |
| SNAPIN     | 1q21.3   | 0.032286 | 0.529267 | 0.626308 |
| ZC3H12A    | 1p34.3   | -0.03228 | 0.529325 | 0.626339 |
| TCF19      | 6p21.33  | 0.032279 | 0.529361 | 0.626345 |
| CDH16      | 16q22.1  | -0.03226 | 0.52961  | 0.626578 |
| LINC00160  | 21q22.12 | 0.032258 | 0.529624 | 0.626578 |
| HELZ2      | 20q13.33 | -0.03226 | 0.529652 | 0.626578 |
| OR2T10     | 1q44     | -0.03225 | 0.529788 | 0.626702 |
| BMP15      | Xp11.22  | 0.032215 | 0.530177 | 0.627125 |
| PPBP       | 4q13.3   | -0.0322  | 0.530413 | 0.627367 |
| PLAC9      | 10q22.3  | -0.03219 | 0.530504 | 0.627402 |

|              |              |          |          |          |
|--------------|--------------|----------|----------|----------|
| UROC1        | 3q21.3       | -0.03219 | 0.530505 | 0.627402 |
| MCM8         | 20p12.3      | -0.03218 | 0.530562 | 0.627433 |
| OR52N5       | 11p15.4      | -0.03218 | 0.530669 | 0.627522 |
| NPPC         | 2q37.1       | 0.032166 | 0.530806 | 0.627627 |
| SELENOI      | 2p23.3       | -0.03216 | 0.530821 | 0.627627 |
| SPINK14      | 5q32         | 0.032149 | 0.531022 | 0.627828 |
| PRKD2        | 19q13.32     | 0.032142 | 0.53111  | 0.627895 |
| PLGLB2       | 2p11.2       | 0.032124 | 0.531344 | 0.628104 |
| TFAP2E       | 1p34.3       | -0.03212 | 0.531349 | 0.628104 |
| GPR37L1      | 1q32.1       | 0.032116 | 0.53144  | 0.628173 |
| ZNF235       | 19q13.31     | 0.032114 | 0.531471 | 0.628173 |
| ITIH4        | 3p21.1       | 0.032057 | 0.532192 | 0.628989 |
| LOC100132831 | Xp11.4       | -0.03205 | 0.532274 | 0.629048 |
| DHX40        | 17q23.1      | 0.032037 | 0.532454 | 0.629224 |
| DDX4         | 5q11.2       | 0.032031 | 0.532534 | 0.629281 |
| PCED1B       | 12q13.11     | 0.032018 | 0.532702 | 0.629417 |
| DVL2         | 17p13.1      | 0.032016 | 0.532716 | 0.629417 |
| DPYS         | 8q22.3       | 0.032012 | 0.532767 | 0.629417 |
| FAM157B      | 9q34.3       | 0.032011 | 0.532789 | 0.629417 |
| CARD17       | 11q22.3      | 0.032009 | 0.532806 | 0.629417 |
| STIL         | 1p33         | 0.032002 | 0.532906 | 0.629498 |
| ADAMTS17     | 15q26.3      | 0.031995 | 0.532994 | 0.629565 |
| SH3GL2       | 9p22.2       | 0.031985 | 0.533125 | 0.629682 |
| ARL5C        | 17q12        | -0.03198 | 0.533226 | 0.629764 |
| TFIP11       | 22q12.1      | 0.031929 | 0.533833 | 0.630444 |
| SDR9C7       | 12q13.3      | -0.03191 | 0.53402  | 0.630628 |
| RUSC2        | 9p13.3       | -0.03189 | 0.534365 | 0.630999 |
| TYR          | 11q14.3      | -0.03187 | 0.534605 | 0.63124  |
| AP3S1        | 5q22.3-q23.1 | 0.031867 | 0.534633 | 0.63124  |
| PNN          | 14q21.1      | 0.031861 | 0.534708 | 0.631274 |
| NAGS         | 17q21.31     | -0.03186 | 0.534724 | 0.631274 |
| R3HCC1       | 8p21.3       | -0.03186 | 0.534777 | 0.631298 |
| SNORA32      | 11q21        | -0.03185 | 0.534816 | 0.631308 |
| IFIT5        | 10q23.31     | 0.031842 | 0.534954 | 0.631433 |
| ZAR1         | 4p11         | -0.03183 | 0.535051 | 0.631474 |
| CNOT10       | 3p22.3       | 0.031834 | 0.535052 | 0.631474 |
| OR5F1        | 11q12.1      | 0.031824 | 0.535181 | 0.63154  |
| YPEL4        | 11q12.1      | 0.031824 | 0.535185 | 0.63154  |
| XKRX         | Xq22.1       | -0.03182 | 0.535202 | 0.63154  |
| SNRNP48      | 6p24.3       | -0.03179 | 0.535559 | 0.631923 |
| AQP7         | 9p13.3       | -0.03178 | 0.535702 | 0.632056 |
| FAM83D       | 20q11.23     | -0.03178 | 0.535747 | 0.632071 |
| TP53TG5      | 20q13.12     | -0.03177 | 0.535821 | 0.632122 |
| HERPUD2      | 7p14.2       | 0.031766 | 0.535929 | 0.632207 |
| EXT2         | 11p11.2      | -0.03176 | 0.535957 | 0.632207 |
| CNOT7        | 8p22         | 0.031753 | 0.536092 | 0.632329 |
| ZNF665       | 19q13.42     | 0.03175  | 0.536139 | 0.632347 |
| F13B         | 1q31.3       | -0.03174 | 0.536228 | 0.632415 |
| LMBR1        | 7q36.3       | 0.031737 | 0.536305 | 0.632469 |
| CGB5         | 19q13.33     | -0.03173 | 0.536433 | 0.632582 |
| KYAT3        | 1p22.2       | 0.031718 | 0.536549 | 0.63267  |
| MED16        | 19p13.3      | -0.03172 | 0.536571 | 0.63267  |
| ATP13A5      | 3q29         | 0.031712 | 0.536616 | 0.632686 |
| EFHD1        | 2q37.1       | 0.031685 | 0.536969 | 0.633065 |
| TAF15        | 17q12        | -0.03165 | 0.537415 | 0.633554 |
| SCARNA3      | 1q25.1       | -0.03164 | 0.53749  | 0.633604 |
| ZMIZ1-AS1    | 10q22.3      | 0.031636 | 0.537598 | 0.633694 |
| SEPTIN14     | 7p11.2       | -0.03162 | 0.537824 | 0.633924 |



|              |            |          |          |          |
|--------------|------------|----------|----------|----------|
| DSCR10       | 21q22.13   | -0.03161 | 0.537875 | 0.633947 |
| ZNF165       | 6p22.1     | -0.03161 | 0.537922 | 0.633964 |
| AWAT2        | Xq13.1     | 0.031602 | 0.53804  | 0.634067 |
| CDH22        | 20q13.12   | -0.0316  | 0.538102 | 0.634102 |
| ITM2B        | 13q14.2    | 0.031589 | 0.53821  | 0.634192 |
| MLF1         | 3q25.32    | -0.03158 | 0.538293 | 0.634253 |
| TMEM151B     | 6p21.1     | -0.03158 | 0.538361 | 0.634295 |
| CCDC74B      | 2q21.1     | -0.03157 | 0.538434 | 0.634345 |
| SUDS3        | 12q24.23   | 0.031564 | 0.538523 | 0.634412 |
|              | 1-Mar 1q41 | 0.031547 | 0.538745 | 0.634636 |
| MYL9         | 20q11.23   | 0.031541 | 0.538817 | 0.634664 |
| OR2S2        | 9p13.3     | 0.03154  | 0.538833 | 0.634664 |
| KEL          | 7q34       | -0.03152 | 0.539146 | 0.634996 |
| KIF3B        | 20q11.21   | -0.03151 | 0.539263 | 0.635097 |
| TMEM214      | 2p23.3     | -0.03149 | 0.53946  | 0.635292 |
| CT45A5       | Xq26.3     | -0.03148 | 0.539565 | 0.635378 |
| SEMA6C       | 1q21.3     | 0.03148  | 0.539604 | 0.635387 |
| KLF14        | 7q32.2     | -0.03146 | 0.539829 | 0.635614 |
| OR2D3        | 11p15.4    | 0.031426 | 0.540298 | 0.636129 |
| OR6C4        | 12q13.2    | -0.03142 | 0.540345 | 0.636147 |
| ILF2         | 1q21.3     | 0.031415 | 0.540451 | 0.636234 |
| LOC100128288 | 17p13.1    | 0.031402 | 0.540618 | 0.636393 |
| BUB1         | 2q13       | 0.031395 | 0.540704 | 0.636457 |
| TMC1         | 9q21.13    | 0.031389 | 0.540777 | 0.636506 |
| DCST1        | 1q21.3     | -0.03138 | 0.540901 | 0.636613 |
| MAGEB18      | Xp21.3     | 0.03137  | 0.541023 | 0.636705 |
| FAM47B       | Xp21.1     | -0.03137 | 0.54105  | 0.636705 |
| ZKSCAN4      | 6p22.1     | 0.031365 | 0.541084 | 0.636705 |
| SLC38A6      | 14q23.1    | -0.03136 | 0.541134 | 0.636705 |
| CLPS         | 6p21.31    | -0.03136 | 0.541137 | 0.636705 |
| TTY6         | Yq11.223   | -0.03133 | 0.541498 | 0.637092 |
| TEX13A       | Xq22.3     | -0.03131 | 0.541838 | 0.63742  |
| CFHR5        | 1q31.3     | -0.0313  | 0.541872 | 0.63742  |
| LINC00442    | 13q12.11   | -0.0313  | 0.541872 | 0.63742  |
| UCMA         | 10p13      | -0.03126 | 0.542455 | 0.638069 |
| AJUBA        | 14q11.2    | 0.031251 | 0.542566 | 0.638143 |
| STARD6       | 18q21.2    | 0.031249 | 0.542582 | 0.638143 |
| ARGFXP2      | 17q11.2    | -0.03124 | 0.542657 | 0.638194 |
| ANKRD30A     | 10p11.21   | -0.03123 | 0.542775 | 0.638289 |
| SNRPN        | 15q11.2    | 0.031231 | 0.542816 | 0.638289 |
| COL20A1      | 20q13.33   | 0.031229 | 0.542846 | 0.638289 |
| LY6K         | 8q24.3     | -0.03123 | 0.542866 | 0.638289 |
| SMAD6        | 15q22.31   | 0.031223 | 0.542925 | 0.638321 |
| POU3F4       | Xq21.1     | 0.031189 | 0.543368 | 0.638804 |
| ZIM2         | 19q13.43   | 0.031185 | 0.54342  | 0.638828 |
| CT45A3       | Xq26.3     | -0.03118 | 0.543495 | 0.638879 |
| NHLRC3       | 13q13.3    | -0.03117 | 0.543559 | 0.638917 |
| IQCK         | 16p12.3    | -0.03116 | 0.543688 | 0.639019 |
| MFN2         | 1p36.22    | 0.031162 | 0.54371  | 0.639019 |
| YBX3P1       | 16p11.2    | 0.031158 | 0.543768 | 0.63905  |
| MAGEA9B      | Xq28       | -0.03115 | 0.54384  | 0.639096 |
| EFCAB2       | 1q44       | 0.031149 | 0.543877 | 0.639102 |
| OCM2         | 7q21.3     | 0.031139 | 0.544008 | 0.639219 |
| GUSBP5       | 4q31.21    | -0.0311  | 0.544545 | 0.639797 |
| IGFL3        | 19q13.32   | -0.0311  | 0.544564 | 0.639797 |
| ARHGAP27P1   | 17q24.1    | -0.03108 | 0.544749 | 0.639977 |
| CLCN4        | Xp22.2     | 0.031077 | 0.544816 | 0.640018 |
| ASB14        | 3p14.3     | 0.03107  | 0.544908 | 0.640089 |

|            |                   |          |          |          |
|------------|-------------------|----------|----------|----------|
| UVSSA      | 4p16.3            | -0.03106 | 0.545053 | 0.640221 |
| GALNT14    | 2p23.1            | 0.030985 | 0.546008 | 0.641305 |
| SNX5       | 20p11.23          | -0.03095 | 0.546467 | 0.641808 |
| MT1B       | 16q13             | -0.03094 | 0.546645 | 0.641979 |
| QRFPR      | 4q27              | 0.030899 | 0.547125 | 0.642504 |
| TP53I11    | 11p11.2           | 0.030892 | 0.547216 | 0.642574 |
| AHSG       | 3q27.3            | -0.03087 | 0.547442 | 0.642801 |
| TEX36      | 10q26.13          | 0.030868 | 0.547518 | 0.642854 |
| NBPF11     | 1q21.2            | 0.030851 | 0.547741 | 0.643077 |
| LGI4       | 19q13.12 19q13.11 | -0.03084 | 0.547942 | 0.643276 |
| ADNP       | 20q13.13          | -0.03083 | 0.547984 | 0.643287 |
| GPR101     | Xq26.3            | -0.03082 | 0.548127 | 0.643405 |
| CACNG6     | 19q13.42          | 0.03082  | 0.548149 | 0.643405 |
| KRTAP2-1   | 17q21.2           | -0.03079 | 0.548501 | 0.643781 |
| SLC25A51P1 | 6q12              | 0.030775 | 0.548728 | 0.644009 |
| CT47A1     | Xq24              | 0.030768 | 0.548828 | 0.644089 |
| S100A13    | 1q21.3            | 0.030757 | 0.54896  | 0.644207 |
| TMSB15B    | Xq22.2            | -0.03075 | 0.549109 | 0.644343 |
| SERPINA6   | 14q32.13          | -0.03073 | 0.549375 | 0.644618 |
| MUC20      | 3q29              | -0.0307  | 0.549691 | 0.644951 |
| TBX6       | 16p11.2           | -0.03069 | 0.549901 | 0.645159 |
| CALML5     | 10p15.1           | -0.03068 | 0.549951 | 0.64518  |
| OR10P1     | 12q13.2           | -0.03067 | 0.55008  | 0.645294 |
| NLGN4Y     | Yq11.221          | 0.030666 | 0.550151 | 0.64534  |
| ZFAT-AS1   | 8q24.22           | 0.03066  | 0.55022  | 0.64537  |
| FOXB2      | 9q21.2            | -0.03066 | 0.550241 | 0.64537  |
| KRTAP5-2   | 11p15.5           | -0.03064 | 0.550465 | 0.645594 |
| CYP2J2     | 1p32.1            | -0.03062 | 0.550753 | 0.645892 |
| FAM218A    | 4q32.3            | 0.030617 | 0.550784 | 0.645892 |
| GPR25      | 1q32.1            | -0.03061 | 0.550892 | 0.645981 |
| TBL1Y      | Yp11.2            | -0.0306  | 0.551052 | 0.646132 |
| CAPN1      | 11q13.1           | -0.03059 | 0.551097 | 0.646146 |
| GK         | Xp21.2            | -0.03057 | 0.551454 | 0.646526 |
| POLR1B     | 2q14.1            | -0.03055 | 0.551594 | 0.646653 |
| ZNF586     | 19q13.43          | -0.03049 | 0.552494 | 0.647671 |
| GSTM1      | 1p13.3            | 0.030483 | 0.552529 | 0.647673 |
| IL13       | 5q31.1            | 0.030454 | 0.552904 | 0.648075 |
| ZDHHC23    | 3q13.31           | -0.03045 | 0.553017 | 0.648169 |
| NWD2       | 4p14              | 0.030432 | 0.553197 | 0.648343 |
| RNF128     | Xq22.3            | -0.03043 | 0.553264 | 0.648383 |
| LINC00938  | 12q12             | -0.03042 | 0.553415 | 0.648523 |
| APOL2      | 22q12.3           | 0.030398 | 0.55364  | 0.648748 |
| ST8SIA5    | 18q21.1           | 0.030392 | 0.553722 | 0.648806 |
| SNAR-E     | 19q13.32          | -0.03039 | 0.553777 | 0.648825 |
| SLC39A7    | 6p21.32           | 0.030386 | 0.553803 | 0.648825 |
| LRRC14B    | 5p15.33           | -0.03035 | 0.554263 | 0.649289 |
| KPNA7      | 7q22.1            | 0.03035  | 0.554264 | 0.649289 |
| TPD52L3    | 9p24.1            | 0.030345 | 0.55433  | 0.649328 |
| WDR33      | 2q14.3            | -0.03034 | 0.554368 | 0.649335 |
| VASH2      | 1q32.3            | 0.03032  | 0.554663 | 0.649628 |
| GANAB      | 11q12.3           | 0.030318 | 0.554683 | 0.649628 |
| BICRA      | 19q13.33          | -0.03029 | 0.555046 | 0.650015 |
| TPPP       | 5p15.33           | -0.03029 | 0.555088 | 0.650026 |
| CDK5R2     | 2q35              | 0.030282 | 0.555156 | 0.650068 |
| GTF2IP1    | 7q11.23           | 0.030274 | 0.555254 | 0.650145 |
| CAMK2N2    | 3q27.1            | 0.03026  | 0.555438 | 0.650322 |
| SPINK13    | 5q32              | 0.030249 | 0.555588 | 0.650391 |
| ASB18      | 2q37.2            | -0.03025 | 0.555591 | 0.650391 |

|           |               |          |          |          |
|-----------|---------------|----------|----------|----------|
| NEBL      | 10p12.31      | 0.030248 | 0.555595 | 0.650391 |
| GRAMD1C   | 3q13.31       | -0.03024 | 0.555699 | 0.650475 |
| ARHGAP10  | 4q31.23       | 0.030234 | 0.555778 | 0.650515 |
| ZNF35     | 3p21.31       | -0.03023 | 0.555814 | 0.650515 |
| LINGO3    | 19p13.3       | 0.03023  | 0.55583  | 0.650515 |
| GSTA4     | 6p12.2        | -0.03022 | 0.555952 | 0.65062  |
| CDR2L     | 17q25.1       | 0.030217 | 0.556003 | 0.650641 |
| ZNF449    | Xq26.3        | -0.03021 | 0.556067 | 0.650679 |
| SEPTIN4   | 17q22         | 0.030205 | 0.55616  | 0.650737 |
| MPP4      | 2q33.1        | -0.0302  | 0.556183 | 0.650737 |
| SLC25A45  | 11q13.1       | 0.030193 | 0.556315 | 0.650854 |
| TECRL     | 4q13.1        | -0.03018 | 0.556522 | 0.651058 |
| HBS1L     | 6q23.3        | -0.03017 | 0.556673 | 0.651197 |
| LRRC3B    | 3p24.1        | -0.03015 | 0.556898 | 0.651422 |
| WNT7A     | 3p25.1        | -0.0301  | 0.557538 | 0.652133 |
| ABHD6     | 3p14.3        | 0.030096 | 0.557586 | 0.652151 |
| EIF1AY    | Yq11.223      | -0.03009 | 0.557626 | 0.652159 |
| SERPINH1  | 11q13.5       | 0.030081 | 0.557786 | 0.652309 |
| PKD1L1    | 7p12.3        | -0.03007 | 0.55795  | 0.652462 |
| PVRIG     | 7q22.1        | -0.03005 | 0.558128 | 0.652632 |
| MAGEB1    | Xp21.2        | -0.03004 | 0.558259 | 0.652717 |
| BRCA2     | 13q13.1       | 0.030044 | 0.558266 | 0.652717 |
| PAK1      | 11q13.5-q14.1 | -0.03003 | 0.558424 | 0.652864 |
| SUMO4     | 6q25.1        | 0.030019 | 0.5586   | 0.653031 |
| POTEE     | 2q21.1        | -0.03001 | 0.558675 | 0.653081 |
| TTC39A    | 1p32.3        | -0.03001 | 0.558771 | 0.653155 |
| ACSM4     | 12p13.31      | 0.02997  | 0.559235 | 0.65363  |
| TTC38     | 22q13.31      | -0.02997 | 0.559242 | 0.65363  |
| SDC4P     | 22q12.2       | -0.02997 | 0.559296 | 0.653654 |
| PSG4      | 19q13.31      | 0.029958 | 0.559403 | 0.653741 |
| ICAM2     | 17q23.3       | 0.029941 | 0.559626 | 0.653964 |
| ZDHHC22   | 14q24.3       | 0.029936 | 0.559681 | 0.65399  |
| SNORA61   | 1p35.3        | -0.02991 | 0.560036 | 0.654299 |
| KRT4      | 12q13.13      | -0.02991 | 0.560041 | 0.654299 |
| GPR87     | 3q25.1        | 0.029909 | 0.560044 | 0.654299 |
| LINC00643 | 14q23.2       | 0.029899 | 0.560168 | 0.654406 |
| KDM4D     | 11q21         | -0.02988 | 0.560361 | 0.654593 |
| TSPAN16   | 19p13.2       | -0.02987 | 0.560551 | 0.654754 |
| OR51S1    | 11p15.4       | 0.029869 | 0.560564 | 0.654754 |
| PLK3      | 1p34.1        | -0.02983 | 0.561056 | 0.655291 |
| RBL1      | 20q11.23      | -0.02983 | 0.56113  | 0.655334 |
| EXO1      | 1q43          | 0.029824 | 0.561158 | 0.655334 |
| OR4E2     | 14q11.2       | 0.0298   | 0.561477 | 0.655668 |
| TENT5B    | 1p36.11       | 0.029792 | 0.561584 | 0.655754 |
| DNMTIP2   | 1p22.1        | -0.02979 | 0.561639 | 0.65578  |
| KCNE5     | Xq23          | -0.02978 | 0.561691 | 0.655803 |
| GDF2      | 10q11.22      | -0.02978 | 0.561753 | 0.655837 |
| ULK1      | 12q24.33      | 0.029773 | 0.561832 | 0.65589  |
| FH        | 1q43          | -0.02977 | 0.561899 | 0.655931 |
| FAM187B   | 19q13.12      | 0.029743 | 0.562217 | 0.656256 |
| PKD2L2    | 5q31.2        | 0.029739 | 0.562271 | 0.656256 |
| ANKRD11   | 16q24.3       | 0.029739 | 0.562276 | 0.656256 |
| CHD5      | 1p36.31       | 0.029732 | 0.562364 | 0.656321 |
| HSPB2     | 11q23.1       | 0.029729 | 0.5624   | 0.656325 |
| SHOC1     | 9q31.3        | 0.029723 | 0.562485 | 0.656385 |
| GABRB2    | 5q34          | 0.0297   | 0.562783 | 0.656695 |
| HIRA      | 22q11.21      | -0.02966 | 0.563281 | 0.657238 |
| IL15      | 4q31.21       | -0.02963 | 0.563726 | 0.657719 |

|           |          |          |          |          |
|-----------|----------|----------|----------|----------|
| CYP4F8    | 19p13.12 | 0.029609 | 0.563991 | 0.65799  |
| C2ORF15   | 2q11.2   | -0.0296  | 0.564041 | 0.658009 |
| CT83      | Xq23     | -0.02957 | 0.564548 | 0.658551 |
| LDB1      | 10q24.32 | 0.029565 | 0.564571 | 0.658551 |
| FBXO24    | 7q22.1   | -0.02956 | 0.56469  | 0.658652 |
| UHRF2     | 9p24.1   | -0.02955 | 0.56473  | 0.65866  |
| HTR4      | 5q32     | 0.029544 | 0.564846 | 0.658757 |
| DLX1      | 2q31.1   | -0.02953 | 0.564987 | 0.658861 |
| OR2C1     | 16p13.3  | 0.029532 | 0.565001 | 0.658861 |
| IRX2      | 5p15.33  | 0.02952  | 0.565152 | 0.658998 |
| FAM90A7P  | 8p23.1   | -0.02951 | 0.565302 | 0.659135 |
| NACC1     | 19p13.13 | -0.0295  | 0.565366 | 0.659171 |
| WNT8A     | 5q31.2   | -0.02949 | 0.56556  | 0.659359 |
| OR11H4    | 14q11.2  | -0.02949 | 0.565602 | 0.659369 |
| MPP7      | 10p12.1  | 0.029481 | 0.565666 | 0.659378 |
| PHYHIPL   | 10q21.1  | -0.02948 | 0.565692 | 0.659378 |
| TP53AIP1  | 11q24.3  | -0.02948 | 0.565708 | 0.659378 |
| DPPA2P3   | 3q29     | -0.02947 | 0.565833 | 0.659422 |
| KRTAP13-4 | 21q22.11 | -0.02947 | 0.565867 | 0.659422 |
| GRHL2     | 8q22.3   | 0.029463 | 0.565908 | 0.659422 |
| DNM3      | 1q24.3   | 0.029461 | 0.565936 | 0.659422 |
| BARHL2    | 1p22.2   | 0.02946  | 0.565948 | 0.659422 |
| SUMF1     | 3p26.1   | 0.029459 | 0.565967 | 0.659422 |
| RPRM      | 2q23.3   | -0.02946 | 0.565992 | 0.659422 |
| OR2B2     | 6p22.1   | -0.02946 | 0.566009 | 0.659422 |
| PTK6      | 20q13.33 | -0.02944 | 0.566254 | 0.65964  |
| ASB10     | 7q36.1   | 0.029436 | 0.566262 | 0.65964  |
| PSORS1C1  | 6p21.33  | 0.029431 | 0.566325 | 0.659647 |
| RRN3P2    | 16p11.2  | -0.02943 | 0.566334 | 0.659647 |
| AJAP1     | 1p36.32  | 0.029426 | 0.566392 | 0.659676 |
| SNUPN     | 15q24.2  | 0.029412 | 0.566584 | 0.65983  |
| LAG3      | 12p13.31 | 0.02941  | 0.566607 | 0.65983  |
| NANOGNB   | 12p13.31 | -0.02941 | 0.566673 | 0.65983  |
| ETFRF1    | 12p12.1  | 0.029404 | 0.566683 | 0.65983  |
| ANXA13    | 8q24.13  | 0.029404 | 0.566689 | 0.65983  |
| HTT       | 4p16.3   | 0.029397 | 0.566786 | 0.659904 |
| FASTKD1   | 2q31.1   | -0.02938 | 0.567041 | 0.660164 |
| AARS2     | 6p21.1   | -0.02935 | 0.567417 | 0.660543 |
| PRAMEF8   | 1p36.21  | -0.02935 | 0.567433 | 0.660543 |
| DNMT3A    | 2p23.3   | 0.029339 | 0.567547 | 0.660638 |
| TSPAN12   | 7q31.31  | -0.02933 | 0.567636 | 0.660702 |
| PLA2G4E   | 15q15.1  | -0.02933 | 0.567708 | 0.660726 |
| NYX       | Xp11.4   | -0.02932 | 0.567738 | 0.660726 |
| PXMP2     | 12q24.33 | -0.02932 | 0.567755 | 0.660726 |
| COBL      | 7p12.1   | 0.029306 | 0.567988 | 0.660935 |
| KRTAP4-4  | 17q21.2  | -0.0293  | 0.568001 | 0.660935 |
| DDX20     | 1p13.2   | -0.0293  | 0.568082 | 0.660991 |
| SERPINI1  | 3q26.1   | 0.029294 | 0.568136 | 0.661016 |
| ZIC2      | 13q32.3  | 0.02929  | 0.568191 | 0.661041 |
| CAPG      | 2p11.2   | 0.029278 | 0.568347 | 0.661163 |
| MYL7      | 7p13     | -0.02928 | 0.568362 | 0.661163 |
| SEL1L2    | 20p12.1  | 0.029274 | 0.56841  | 0.661181 |
| LYPD4     | 19q13.2  | 0.029271 | 0.568445 | 0.661183 |
| APOBEC3F  | 22q13.1  | 0.029266 | 0.568506 | 0.661216 |
| SPINK9    | 5q32     | 0.029263 | 0.568555 | 0.661234 |
| HTATSF1   | Xq26.3   | 0.029254 | 0.568671 | 0.661331 |
| TMEM155   | 4q27     | 0.029226 | 0.569035 | 0.661716 |
| DDX25     | 11q24.2  | 0.029223 | 0.569085 | 0.661736 |

|           |                 |          |          |          |
|-----------|-----------------|----------|----------|----------|
| PYGO2     | 1q21.3          | 0.0292   | 0.569377 | 0.662021 |
| TMEM64    | 8q21.3          | -0.0292  | 0.569397 | 0.662021 |
| FAM91A1   | 8q24.13         | 0.029189 | 0.569534 | 0.662142 |
| SLC25A16  | 10q21.3         | 0.029158 | 0.569941 | 0.662555 |
| ZNF528    | 19q13.41        | 0.029157 | 0.569955 | 0.662555 |
| HES7      | 17p13.1         | -0.02915 | 0.569995 | 0.662563 |
| VSTM2L    | 20q11.23        | -0.02915 | 0.57003  | 0.662564 |
| GYPA      | 4q31.21         | -0.02914 | 0.570139 | 0.662653 |
| PROK1     | 1p13.3          | -0.02914 | 0.570224 | 0.662714 |
| RFESD     | 5q15            | -0.02913 | 0.570349 | 0.66282  |
| ANKRD18DP | 3q29            | -0.02912 | 0.570491 | 0.662946 |
| OR11L1    | 1q44            | 0.029106 | 0.570624 | 0.663063 |
| KLHL10    | 17q21.2         | 0.029103 | 0.57067  | 0.663073 |
| CLK2P1    | 7p15.3          | -0.0291  | 0.570699 | 0.663073 |
| ABI2      | 2q33.2          | 0.029083 | 0.57093  | 0.663303 |
| PPP4R4    | 14q32.12-q32.13 | 0.029078 | 0.570994 | 0.663339 |
| ZC3H18    | 16q24.2         | -0.02908 | 0.57103  | 0.663342 |
| DKK1      | 10q21.1         | -0.02906 | 0.571183 | 0.663482 |
| SMR3B     | 4q13.3          | -0.02906 | 0.571279 | 0.663528 |
| MMP3      | 11q22.2         | 0.029056 | 0.57129  | 0.663528 |
| GSDMB     | 17q21.1         | -0.02905 | 0.571369 | 0.663582 |
| NPBWR2    | 20q13.33        | 0.029035 | 0.571566 | 0.663772 |
| MASP2     | 1p36.22         | -0.02902 | 0.571725 | 0.663918 |
| DEFB103A  | 8p23.1          | -0.02902 | 0.57183  | 0.664002 |
| ZNF44     | 19p13.2         | -0.02901 | 0.571877 | 0.664009 |
| NFE2      | 12q13.13        | -0.02901 | 0.571903 | 0.664009 |
| HTR3A     | 11q23.2         | 0.029004 | 0.57198  | 0.664061 |
| PWP2      | 21q22.3         | -0.02899 | 0.572168 | 0.664241 |
| OR6X1     | 11q24.1         | 0.028973 | 0.572396 | 0.664466 |
| EID3      | 12q23.3         | 0.028956 | 0.572611 | 0.664648 |
| FAM200A   | 7q22.1          | -0.02895 | 0.572642 | 0.664648 |
| TAS2R46   | 12p13.2         | -0.02895 | 0.572652 | 0.664648 |
| PKN1      | 19p13.12        | -0.02894 | 0.572777 | 0.664754 |
| RIPK4     | 21q22.3         | -0.02894 | 0.572842 | 0.664792 |
| GTF3C6    | 6q21            | 0.028924 | 0.573037 | 0.664979 |
| SEMA3A    | 7q21.11         | 0.028919 | 0.573102 | 0.665016 |
| GGT3P     | 22q11.21        | -0.0289  | 0.573331 | 0.665243 |
| LRTM2     | 12p13.33        | 0.028894 | 0.573432 | 0.665322 |
| NCBP1     | 9q22.33         | 0.02889  | 0.573497 | 0.665358 |
| ANKRD20A3 | 9q21.11         | -0.02889 | 0.573558 | 0.665391 |
| SULT1A1   | 16p11.2         | -0.02887 | 0.573719 | 0.66554  |
| SSX9P     | Xp11.23         | 0.028858 | 0.573923 | 0.665737 |
| PDIA4     | 7q36.1          | -0.02885 | 0.57404  | 0.665834 |
| GUCD1     | 22q11.23        | -0.02884 | 0.574091 | 0.665855 |
| OR2G3     | 1q44            | 0.028836 | 0.574212 | 0.665957 |
| RP2       | Xp11.3          | 0.028832 | 0.574265 | 0.66598  |
| FRG1BP    | 20q11.1         | -0.02882 | 0.574446 | 0.666151 |
| XAGE2     | Xp11.22         | -0.02879 | 0.574767 | 0.666484 |
| WFDC12    | 20q13.12        | 0.028791 | 0.574801 | 0.666484 |
| KDM8      | 16p12.1         | -0.02879 | 0.574853 | 0.666484 |
| POLR3C    | 1q21.1          | 0.028787 | 0.574866 | 0.666484 |
| HMGXB3    | 5q32            | 0.028779 | 0.574961 | 0.666555 |
| COG1      | 17q25.1         | -0.02877 | 0.575118 | 0.666699 |
| TMEM213   | 7q34            | 0.028756 | 0.575268 | 0.666834 |
| C6ORF58   | 6q22.33         | 0.028754 | 0.575302 | 0.666835 |
| OR51M1    | 11p15.4         | 0.028733 | 0.575579 | 0.667118 |
| GNG8      | 19q13.32        | -0.02872 | 0.575779 | 0.667311 |
| ZNF132    | 19q13.43        | 0.028714 | 0.575828 | 0.667316 |

|             |                 |          |          |          |
|-------------|-----------------|----------|----------|----------|
| UCP1        | 4q31.1          | 0.028712 | 0.575851 | 0.667316 |
| TMEM150C    | 4q21.22         | -0.02871 | 0.575911 | 0.667347 |
| NUPR1       | 16p11.2         | -0.02869 | 0.5761   | 0.667528 |
| WDR45B      | 17q25.3         | -0.02868 | 0.576263 | 0.667678 |
| DDO         | 6q21            | -0.02867 | 0.576409 | 0.667809 |
| TDO2        | 4q32.1          | -0.02866 | 0.576604 | 0.667996 |
| IFNL1       | 19q13.2         | -0.02865 | 0.576673 | 0.668037 |
| CHMP5       | 9p13.3          | 0.028642 | 0.576784 | 0.668128 |
| SNRNP27     | 2p13.3          | -0.02863 | 0.576928 | 0.668255 |
| KRTAP5-8    | 11q13.4         | 0.028629 | 0.576964 | 0.668259 |
| HYDIN       | 16q22.2         | 0.028608 | 0.577237 | 0.668536 |
| SLC47A2     | 17p11.2         | 0.028602 | 0.577323 | 0.668572 |
| ACHE        | 7q22.1          | 0.028601 | 0.577335 | 0.668572 |
| COL7A1      | 3p21.31         | 0.028559 | 0.577891 | 0.669177 |
| QRFP        | 9q34.12         | -0.02855 | 0.578006 | 0.669272 |
| UCP3        | 11q13.4         | 0.028536 | 0.578199 | 0.669457 |
| TAFA4       | 3p14.1          | 0.028485 | 0.57888  | 0.670206 |
| MDGA2       | 14q21.3         | 0.028471 | 0.579071 | 0.670389 |
| LINC00909   | 18q22.3         | -0.02845 | 0.579308 | 0.670625 |
| UTS2        | 1p36.23         | 0.028439 | 0.579496 | 0.670803 |
| SNORA51     | 20p13           | -0.02843 | 0.579635 | 0.670925 |
| ACP5        | 19p13.2         | 0.028413 | 0.57984  | 0.671124 |
| RNF40       | 16p11.2         | -0.0284  | 0.580067 | 0.671347 |
| PRKAB1      | 12q24.23        | 0.028388 | 0.580173 | 0.671432 |
| SPDYE6      | 7q22.1          | -0.02838 | 0.580242 | 0.671473 |
| SIX2        | 2p21            | 0.02838  | 0.580278 | 0.671475 |
| ERC2-IT1    | 3p14.3          | 0.028367 | 0.580452 | 0.671639 |
| MIOS        | 7p21.3          | -0.02836 | 0.580518 | 0.671675 |
| IRX1        | 5p15.33         | 0.028346 | 0.580732 | 0.671885 |
| RRP1B       | 21q22.3         | -0.02833 | 0.580923 | 0.672067 |
| NMRK2       | 19p13.3         | -0.02832 | 0.581096 | 0.672228 |
| ZBTB5       | 9p13.2          | -0.02831 | 0.581208 | 0.672318 |
| FSTL3       | 19p13.3         | -0.02829 | 0.581484 | 0.672599 |
| OR51I2      | 11p15.4         | -0.02828 | 0.581676 | 0.672782 |
| NOL9        | 1p36.31         | 0.028272 | 0.581721 | 0.672796 |
| SNORA54     | 11p15.4         | 0.02826  | 0.581882 | 0.672939 |
| RTL10       | 22q11.21        | -0.02826 | 0.581912 | 0.672939 |
| CLDN2       | Xq22.3          | 0.028253 | 0.581976 | 0.672974 |
| DEFB126     | 20p13           | 0.028246 | 0.582075 | 0.673049 |
| LPCAT3      | 12p13.31        | -0.02823 | 0.582312 | 0.673252 |
| RRM1        | 11p15.4         | 0.028227 | 0.582321 | 0.673252 |
| HBM         | 16p13.3         | -0.02822 | 0.582351 | 0.673252 |
| FRMD1       | 6q27            | -0.02821 | 0.582501 | 0.673386 |
| SORBS3      | 8p21.3          | 0.028207 | 0.582586 | 0.673422 |
| MAFA        | 8q24.3          | 0.028206 | 0.582599 | 0.673422 |
| CENPBD1     | 16q24.3         | -0.02818 | 0.582949 | 0.673787 |
| SOX1        | 13q34           | 0.028166 | 0.583138 | 0.673967 |
| RND3        | 2q23.3          | 0.02816  | 0.583217 | 0.674019 |
| GPM6B       | Xp22.2          | 0.028141 | 0.583479 | 0.67425  |
| HIST1H2BM   | 6p22.1          | -0.02814 | 0.583484 | 0.67425  |
| NLRP2       | 19q13.42        | 0.02812  | 0.58375  | 0.674519 |
| PRR30       | 2p23.3          | 0.028115 | 0.583828 | 0.674553 |
| FAM215A     | 17q21.31        | 0.028111 | 0.583873 | 0.674553 |
| PHACTR2-AS1 | 6q24.2          | -0.02811 | 0.58388  | 0.674553 |
| ZNF625      | 19p13.2         | 0.028096 | 0.584078 | 0.674742 |
| SLC16A8     | 22q13.1         | 0.028089 | 0.584173 | 0.674813 |
| HPN-AS1     | 19q13.11-q13.12 | 0.028077 | 0.584325 | 0.674949 |
| PRAMEF2     | 1p36.21         | -0.02807 | 0.584443 | 0.675047 |

|                         |                |          |          |          |
|-------------------------|----------------|----------|----------|----------|
| ZNF639                  | 3q26.33        | -0.02805 | 0.584629 | 0.675222 |
| WBP2NL                  | 22q13.2        | -0.02804 | 0.584795 | 0.675376 |
| FXVD7                   | 19q13.12       | -0.02802 | 0.585081 | 0.67564  |
| SUGT1P4-STRA6LP-CCDC180 | 9q22.33        | -0.02802 | 0.585091 | 0.67564  |
| OR5T2                   | 11q12.1        | -0.02801 | 0.585203 | 0.675729 |
| OR1N1                   | 9q33.2         | -0.02801 | 0.585288 | 0.675789 |
| SRRM2-AS1               | 16p13.3        | 0.027994 | 0.585441 | 0.675916 |
| TMEM104                 | 17q25.1        | -0.02799 | 0.585465 | 0.675916 |
| ZNF721                  | 4p16.3         | 0.027978 | 0.585653 | 0.676093 |
| GJA10                   | 6q15           | -0.02797 | 0.58575  | 0.676167 |
| HYAL6P                  | 7q31.32        | 0.027949 | 0.586051 | 0.676444 |
| SLC17A3                 | 6p22.2         | -0.02795 | 0.586058 | 0.676444 |
| GLIPR1L2                | 12q21.2        | -0.02793 | 0.586284 | 0.676666 |
| WDR86                   | 7q36.1         | -0.02791 | 0.586625 | 0.676952 |
| RXYLT1                  | 12q14.2        | -0.02791 | 0.586626 | 0.676952 |
| PLEKHG7                 | 12q22          | 0.027905 | 0.586633 | 0.676952 |
| SERPINB4                | 18q21.33       | 0.027884 | 0.586915 | 0.677239 |
| GOLGA8F                 | 15q13.1        | -0.02787 | 0.587047 | 0.677351 |
| STRADA                  | 17q23.3        | -0.02786 | 0.587258 | 0.67754  |
| TNRC18                  | 7p22.1         | 0.027857 | 0.587278 | 0.67754  |
| ZSWIM2                  | 2q32.1         | 0.027852 | 0.587348 | 0.677564 |
| SCGB1A1                 | 11q12.3        | -0.02785 | 0.587367 | 0.677564 |
| TYW1B                   | 7q11.22-q11.23 | -0.02784 | 0.587562 | 0.67775  |
| QRICH2                  | 17q25.1        | 0.02783  | 0.587638 | 0.677765 |
| RPAP2                   | 1p22.1         | -0.02783 | 0.587643 | 0.677765 |
| CLLU1                   | 12q22          | -0.02782 | 0.587797 | 0.677904 |
| CCL17                   | 16q21          | -0.02781 | 0.587852 | 0.677929 |
| FAM238B                 | 10p12.1        | -0.02781 | 0.587908 | 0.677954 |
| HOXB5                   | 17q21.32       | 0.027792 | 0.588151 | 0.678196 |
| CFAP161                 | 15q25.1        | 0.027764 | 0.588524 | 0.678555 |
| PLA2G4F                 | 15q15.1        | 0.027764 | 0.58853  | 0.678555 |
| AOPEP                   | 9q22.32        | 0.027756 | 0.588643 | 0.678646 |
| DAZ4                    | Yq11.23        | -0.02774 | 0.588844 | 0.678839 |
| SRARP                   | 1p36.13        | -0.02773 | 0.588926 | 0.678894 |
| TTC9B                   | 19q13.2        | 0.027717 | 0.589166 | 0.679131 |
| NDP                     | Xp11.3         | -0.0277  | 0.589434 | 0.679364 |
| ACVR2B                  | 3p22.2         | -0.0277  | 0.589436 | 0.679364 |
| REM1                    | 20q11.21       | 0.027689 | 0.58954  | 0.679445 |
| RXFP2                   | 13q13.1        | 0.027656 | 0.589984 | 0.679918 |
| IFI27                   | 14q32.12       | -0.02765 | 0.590041 | 0.679944 |
| STIMATE                 | 3p21.1         | -0.02765 | 0.590125 | 0.680002 |
| FAM83A-AS1              | 8q24.13        | -0.02764 | 0.590253 | 0.68011  |
| GFOD1                   | 6p23           | -0.0276  | 0.590675 | 0.680558 |
| ATP2B3                  | Xq28           | 0.027577 | 0.591045 | 0.680945 |
| OPN4                    | 10q23.2        | 0.027571 | 0.591125 | 0.680982 |
| OR1D4                   | 17p13.3        | -0.02757 | 0.591146 | 0.680982 |
| MED29                   | 19q13.2        | 0.02756  | 0.591272 | 0.681089 |
| KCNC4                   | 1p13.3         | 0.027557 | 0.591313 | 0.681096 |
| TECTB                   | 10q25.2        | -0.02753 | 0.59169  | 0.681491 |
| APOBEC3A                | 22q13.1        | -0.02747 | 0.592548 | 0.682441 |
| RAMP1                   | 2q37.3         | 0.027461 | 0.592605 | 0.682467 |
| LEXM                    | 1p32.3         | 0.027457 | 0.592665 | 0.682496 |
| MIR155HG                | -              | -0.02745 | 0.592789 | 0.6826   |
| TTC17                   | 11p12-p11.2    | 0.02744  | 0.592893 | 0.68268  |
| SLC25A23                | 19p13.3        | 0.027436 | 0.592949 | 0.68268  |
| CA13                    | 8q21.2         | -0.02743 | 0.592989 | 0.68268  |
| OR4D6                   | 11q12.1        | 0.027432 | 0.593004 | 0.68268  |
| PLA2G2C                 | 1p36.12        | 0.027429 | 0.59304  | 0.68268  |

|           |             |          |          |          |
|-----------|-------------|----------|----------|----------|
| INCENP    | 11q12.3     | 0.027426 | 0.593076 | 0.68268  |
| LINC00636 | 3q13.12     | 0.027425 | 0.593097 | 0.68268  |
| CRBN      | 3p26.2      | -0.02741 | 0.593259 | 0.682823 |
| MESP2     | 15q26.1     | 0.02741  | 0.593289 | 0.682823 |
| RACGAP1   | 12q13.12    | 0.027357 | 0.594005 | 0.683608 |
| PDIA5     | 3q21.1      | 0.027315 | 0.594575 | 0.684176 |
| LOC728024 | 8p11.23     | -0.02731 | 0.594601 | 0.684176 |
| DCLK3     | 3p22.2      | 0.027313 | 0.594607 | 0.684176 |
| PPRC1     | 10q24.32    | 0.027311 | 0.594636 | 0.684176 |
| TRPC5     | Xq23        | 0.027303 | 0.594743 | 0.684261 |
| RPL22L1   | 3q26.2      | 0.02729  | 0.594912 | 0.684415 |
| LOC283922 | 16q23.1     | 0.027283 | 0.595014 | 0.684493 |
| GBP7      | 1p22.2      | 0.027266 | 0.595243 | 0.684718 |
| MKRN2     | 3p25.2      | 0.027216 | 0.595906 | 0.685441 |
| SYNGR4    | 19q13.33    | 0.027211 | 0.59598  | 0.685463 |
| BAG6      | 6p21.33     | 0.02721  | 0.595994 | 0.685463 |
| NETO2     | 16q12.1     | 0.027201 | 0.596122 | 0.685571 |
| C6ORF118  | 6q27        | 0.027185 | 0.596337 | 0.68578  |
| OR51A7    | 11p15.4     | 0.027178 | 0.596423 | 0.685799 |
| TMEM202   | 15q23-q24.1 | -0.02718 | 0.596423 | 0.685799 |
| MYRIP     | 3p22.1      | -0.02715 | 0.596798 | 0.686191 |
| PEX2      | 8q21.13     | -0.02713 | 0.597044 | 0.686435 |
| S100A8    | 1q21.3      | 0.027123 | 0.597169 | 0.686539 |
| KNSTRN    | 15q15.1     | -0.02712 | 0.597271 | 0.686617 |
| SFTA3     | 14q13.3     | 0.027101 | 0.597462 | 0.686797 |
| MAFK      | 7p22.3      | -0.02709 | 0.597557 | 0.686866 |
| ZDHHC11   | 5p15.33     | 0.027074 | 0.597835 | 0.687146 |
| LINC00410 | 13q31.3     | -0.02703 | 0.5984   | 0.687757 |
| SPAAR     | 9p13.3      | -0.02703 | 0.598451 | 0.687776 |
| CAMK2G    | 10q22.2     | -0.02702 | 0.598533 | 0.68783  |
| NKX2-5    | 5q35.1      | 0.027009 | 0.598718 | 0.687985 |
| TBC1D3P2  | 17q23.2     | -0.02701 | 0.598736 | 0.687985 |
| CACNA1I   | 22q13.1     | 0.027001 | 0.598816 | 0.688034 |
| SCRT2     | 20p13       | 0.026999 | 0.598848 | 0.688034 |
| SBK1      | 16p12.1     | -0.02699 | 0.598979 | 0.688145 |
| CYB5R2    | 11p15.4     | -0.02697 | 0.599241 | 0.688407 |
| RNF170    | 8p11.21     | -0.02695 | 0.599469 | 0.688629 |
| SAMD5     | 6q24.3      | 0.02695  | 0.599509 | 0.688636 |
| SNHG28    | 1q23.2      | -0.02692 | 0.59989  | 0.689002 |
| AZU1      | 19p13.3     | 0.026922 | 0.599897 | 0.689002 |
| TM4SF20   | 2q36.3      | -0.02692 | 0.599964 | 0.689041 |
| IQUB      | 7q31.32     | -0.02689 | 0.600384 | 0.689461 |
| C20ORF141 | 20p13       | 0.026885 | 0.600399 | 0.689461 |
| SRP14P1   | 12p13.31    | -0.02687 | 0.600646 | 0.689705 |
| KRTAP9-2  | 17q21.2     | -0.02686 | 0.600797 | 0.689839 |
| CSTB      | 21q22.3     | 0.026844 | 0.600948 | 0.689972 |
| BEST3     | 12q15       | 0.026834 | 0.601084 | 0.690088 |
| ZNF705A   | 12p13.31    | -0.02683 | 0.601153 | 0.690128 |
| SEC11C    | 18q21.32    | 0.026825 | 0.601202 | 0.690145 |
| GUCY2EP   | 11q13.5     | 0.026809 | 0.60142  | 0.690356 |
| MYOD1     | 11p15.1     | -0.0268  | 0.601495 | 0.690403 |
| PCDH19    | Xq22.1      | 0.0268   | 0.601553 | 0.690429 |
| FAM155B   | Xq13.1      | 0.026795 | 0.601612 | 0.690457 |
| PPM1N     | 19q13.32    | -0.02679 | 0.601716 | 0.690535 |
| MCMBP     | 10q26.11    | 0.026785 | 0.601749 | 0.690535 |
| KRTAP13-2 | 21q22.11    | 0.026778 | 0.601839 | 0.69057  |
| KIF17     | 1p36.12     | 0.026778 | 0.601848 | 0.69057  |
| MAP1LC3B2 | 12q24.22    | -0.02677 | 0.601968 | 0.690668 |



|           |                 |          |          |          |
|-----------|-----------------|----------|----------|----------|
| SFTPA1    | 10q22.3         | 0.026759 | 0.602105 | 0.690786 |
| CCL4L1    | 17q12           | 0.026749 | 0.602242 | 0.690904 |
| MARVELD3  | 16q22.2         | 0.026726 | 0.602546 | 0.691213 |
| TRIB1     | 8q24.13         | 0.026669 | 0.603038 | 0.691737 |
| SLC35G5   | 8p23.1          | 0.026679 | 0.603189 | 0.691871 |
| GGACT     | 13q32.3         | 0.026676 | 0.603228 | 0.691876 |
| LRP5      | 11q13.2         | 0.026666 | 0.603447 | 0.692088 |
| SLC16A11  | 17p13.1         | -0.02666 | 0.603485 | 0.692092 |
| ESX1      | Xq22.2          | 0.026633 | 0.603808 | 0.692388 |
| NRCAM     | 7q31.1          | 0.026633 | 0.603813 | 0.692388 |
| POM121L1P | 22q11.22        | 0.026617 | 0.604035 | 0.692603 |
| MLH1      | 3p22.2          | 0.026609 | 0.604135 | 0.692678 |
| GRAMD4    | 22q13.31        | 0.026601 | 0.604246 | 0.692766 |
| SRI       | 7q21.12         | -0.0266  | 0.604313 | 0.692794 |
| ARHGEF9   | Xq11.1          | 0.026594 | 0.60434  | 0.692794 |
| DUT       | 15q21.1         | 0.026589 | 0.604419 | 0.69284  |
| TBX22     | Xq21.1          | 0.026586 | 0.604449 | 0.69284  |
| LINC01128 | 1p36.33         | -0.02657 | 0.604676 | 0.693061 |
| HLA-E     | 6p22.1          | 0.026555 | 0.604875 | 0.693249 |
| WFIKN2    | 17q21.33        | 0.026513 | 0.605452 | 0.69387  |
| ALPL      | 1p36.12         | 0.026497 | 0.605666 | 0.694076 |
| TRPM1     | 15q13.3         | 0.026487 | 0.605794 | 0.694183 |
| CCDC142   | 2p13.1          | -0.02648 | 0.605945 | 0.694316 |
| CRELD2    | 22q13.33        | -0.02647 | 0.605997 | 0.694337 |
| KRTAP9-4  | 17q21.2         | 0.026466 | 0.606081 | 0.694392 |
| AQP1      | 7p14.3          | 0.02646  | 0.606167 | 0.694452 |
| TRMT9B    | 8p22            | 0.026431 | 0.606557 | 0.694859 |
| TIMM17A   | 1q32.1          | 0.026415 | 0.606783 | 0.695058 |
| ZNF765    | 19q13.42        | 0.026414 | 0.606801 | 0.695058 |
| VSIG8     | 1q23.2          | -0.0264  | 0.606978 | 0.695221 |
| NECAB2    | 16q23.3         | 0.02639  | 0.607122 | 0.695347 |
| LINC01845 | 5q33.3          | 0.026384 | 0.607197 | 0.695393 |
| SLC20A2   | 8p11.21         | 0.026332 | 0.607919 | 0.696179 |
| PRAMEF18  | 1p36.21         | -0.02632 | 0.608031 | 0.696268 |
| ZNF367    | 9q22.32 9q22.32 | 0.026321 | 0.608065 | 0.696268 |
| SLC27A1   | 19p13.11        | 0.026304 | 0.608288 | 0.696483 |
| SLC13A4   | 7q33            | 0.026299 | 0.608355 | 0.69652  |
| GJB7      | 6q14.3-q15      | 0.026293 | 0.60844  | 0.696549 |
| HTR2C     | Xq23            | 0.02629  | 0.608481 | 0.696549 |
| NPAS1     | 19q13.32        | -0.02629 | 0.608485 | 0.696549 |
| TMPRSS11A | 4q13.2          | 0.026283 | 0.608584 | 0.696608 |
| LHX6      | 9q33.2          | -0.02628 | 0.608606 | 0.696608 |
| MAK       | 6p24.2          | -0.02627 | 0.60873  | 0.69671  |
| TSPY3     | Yp11.2          | 0.026249 | 0.609042 | 0.696988 |
| SPINK8    | 3p21.31         | -0.02625 | 0.609042 | 0.696988 |
| MARK4     | 19q13.32        | -0.02624 | 0.609108 | 0.697023 |
| GNB3      | 12p13.31        | 0.026223 | 0.609396 | 0.697313 |
| ZBTB32    | 19q13.12        | 0.026199 | 0.609731 | 0.697656 |
| CLCNKB    | 1p36.13         | -0.02618 | 0.609982 | 0.697904 |
| ARHGAP27  | 17q21.31        | 0.026169 | 0.610142 | 0.698011 |
| AMMECR1   | Xq23            | 0.026168 | 0.610145 | 0.698011 |
| RNPC3     | 1p21.1          | -0.02615 | 0.610392 | 0.698253 |
| SYCP2     | 20q13.33        | -0.02613 | 0.610605 | 0.698451 |
| NAMPT     | 7q22.3          | 0.026132 | 0.610648 | 0.698451 |
| LENEP     | 1q21.3          | 0.02613  | 0.61067  | 0.698451 |
| FGF13     | Xq26.3-q27.1    | -0.02612 | 0.610807 | 0.698508 |
| FAM71A    | 1q32.3          | -0.02612 | 0.610807 | 0.698508 |
| TCF7L1    | 2p11.2          | -0.02612 | 0.610824 | 0.698508 |

|           |               |          |          |          |
|-----------|---------------|----------|----------|----------|
| IZUMO1    | 19q13.33      | 0.026115 | 0.610871 | 0.698522 |
| DEFB131A  | 4p16.1        | -0.0261  | 0.611068 | 0.698681 |
| OSBPL7    | 17q21.32      | -0.0261  | 0.61108  | 0.698681 |
| MYCL      | 1p34.2        | 0.026065 | 0.611557 | 0.699187 |
| SLC5A8    | 12q23.1-q23.2 | 0.02605  | 0.611756 | 0.699375 |
| FAM110D   | 1p36.11       | 0.026046 | 0.611816 | 0.69938  |
| SERPINE2  | 2q36.1        | 0.026045 | 0.611831 | 0.69938  |
| OR1L4     | 9q33.2        | -0.02604 | 0.611877 | 0.699393 |
| ZNF326    | 1p22.2        | 0.026038 | 0.611931 | 0.699414 |
| B3GAT2    | 6q13          | -0.02603 | 0.612004 | 0.699458 |
| SERPINI2  | 3q26.1        | 0.026018 | 0.612202 | 0.699645 |
| ADAMTS19  | 5q23.3        | -0.02598 | 0.61276  | 0.700166 |
| DNAAF2    | 14q21.3       | 0.025976 | 0.612779 | 0.700166 |
| BTNL9     | 5q35.3        | 0.02597  | 0.612858 | 0.700166 |
| U2SURP    | 3q23          | -0.02597 | 0.612873 | 0.700166 |
| SLC25A43  | Xq24          | -0.02597 | 0.612888 | 0.700166 |
| OR1N2     | 9q33.2        | -0.02597 | 0.612916 | 0.700166 |
| TRAF5     | 1q32.3        | -0.02596 | 0.612935 | 0.700166 |
| USP30     | 12q24.11      | -0.02596 | 0.612938 | 0.700166 |
| PANK2     | 20p13         | -0.02595 | 0.613168 | 0.700388 |
| SNORA50A  | 16q21         | 0.025937 | 0.613312 | 0.700513 |
| FGD1      | Xp11.22       | -0.02588 | 0.614134 | 0.701412 |
| PCGEM1    | 2q32.3        | -0.02586 | 0.61442  | 0.701698 |
| MYL12B    | 18p11.31      | 0.025843 | 0.614591 | 0.701854 |
| ZNF567    | 19q13.12      | 0.025822 | 0.614888 | 0.702153 |
| USP42     | 7p22.1        | -0.02581 | 0.615084 | 0.702307 |
| ZNF717    | 3p12.3        | -0.02581 | 0.615093 | 0.702307 |
| LOC441455 | 9q22.33       | 0.02579  | 0.615324 | 0.702515 |
| UCN3      | 10p15.1       | -0.02579 | 0.615357 | 0.702515 |
| CLDN19    | 1p34.2        | -0.02579 | 0.615381 | 0.702515 |
| PCYOX1L   | 5q32          | 0.025777 | 0.615504 | 0.702617 |
| C12ORF40  | 12q12         | -0.02577 | 0.615564 | 0.702645 |
| FOXO4     | Xq13.1        | 0.02575  | 0.615863 | 0.702946 |
| TRNT1     | 3p26.2        | 0.025736 | 0.616058 | 0.703128 |
| GABBR2    | 9q22.33       | -0.02573 | 0.616105 | 0.703142 |
| ACER1     | 19p13.3       | 0.025727 | 0.616188 | 0.703197 |
| PON1      | 7q21.3        | 0.025703 | 0.616519 | 0.703535 |
| DNAJC14   | 12q13.2       | 0.025698 | 0.61658  | 0.703564 |
| RIOK2     | 5q15          | 0.025685 | 0.616758 | 0.703726 |
| ITPKA     | 15q15.1       | 0.025658 | 0.617133 | 0.704114 |
| CRYGN     | 7q36.1        | -0.02565 | 0.617306 | 0.704253 |
| TMEM268   | 9q32          | -0.02564 | 0.617325 | 0.704253 |
| SLC5A5    | 19p13.11      | 0.025636 | 0.617431 | 0.704334 |
| CDH15     | 16q24.3       | -0.02562 | 0.617705 | 0.704605 |
| C10ORF53  | 10q11.23      | -0.02561 | 0.617739 | 0.704605 |
| ASCC1     | 10q22.1       | -0.0256  | 0.617954 | 0.704811 |
| LOC145845 | 15q14         | 0.025589 | 0.61808  | 0.704914 |
| TMEM225   | 11q24.1       | 0.025576 | 0.618256 | 0.705074 |
| CABS1     | 4q13.3        | -0.02556 | 0.618504 | 0.705317 |
| FLG2      | 1q21.3        | 0.025555 | 0.61854  | 0.705319 |
| MYO15A    | 17p11.2       | -0.02555 | 0.618652 | 0.705406 |
| C11ORF94  | 11p11.2       | 0.025542 | 0.618722 | 0.705445 |
| ASCL4     | 12q23.3       | 0.025531 | 0.618873 | 0.705577 |
| LCN2      | 9q34.11       | 0.02547  | 0.61972  | 0.706503 |
| CNKS3     | 6q25.2        | -0.02545 | 0.620046 | 0.706794 |
| SLC35E2A  | 1p36.33       | 0.025444 | 0.620067 | 0.706794 |
| TMEM9B    | 11p15.4       | 0.025443 | 0.620082 | 0.706794 |
| LRRTM4    | 2p12          | 0.025436 | 0.620185 | 0.706855 |

|           |          |          |          |          |
|-----------|----------|----------|----------|----------|
| PRR23C    | 3q23     | -0.02543 | 0.620205 | 0.706855 |
| OR52M1    | 11p15.4  | -0.02542 | 0.620368 | 0.707    |
| CIB2      | 15q25.1  | 0.025386 | 0.620869 | 0.707482 |
| FAM224B   | Yq11.222 | -0.02538 | 0.620896 | 0.707482 |
| SH3BP1    | 22q13.1  | 0.025382 | 0.62092  | 0.707482 |
| LMAN1L    | 15q24.1  | 0.025381 | 0.620932 | 0.707482 |
| HEXB      | 5q13.3   | 0.02535  | 0.62137  | 0.70794  |
| RB1       | 13q14.2  | 0.025342 | 0.621474 | 0.708018 |
| TKTL2     | 4q32.2   | 0.025334 | 0.621586 | 0.708105 |
| APIP      | 11p13    | -0.02533 | 0.621684 | 0.708177 |
| OR13C3    | 9q31.1   | 0.02532  | 0.621779 | 0.708245 |
| ADAM18    | 8p11.22  | -0.02531 | 0.621929 | 0.708375 |
| EXTL1     | 1p36.11  | 0.025297 | 0.622088 | 0.708516 |
| FAM92A1P2 | 4q35.1   | -0.02529 | 0.622212 | 0.708617 |
| MISP3     | 19p13.12 | -0.02527 | 0.622425 | 0.7088   |
| CD40      | 20q13.12 | -0.02527 | 0.622458 | 0.7088   |
| ZNF876P   | 4p16.3   | 0.025269 | 0.622479 | 0.7088   |
| OR4C3     | 11p11.2  | -0.02526 | 0.622573 | 0.708844 |
| LOC728989 | 1q21.1   | 0.025261 | 0.622588 | 0.708844 |
| PACS2     | 14q32.33 | -0.02525 | 0.622778 | 0.709021 |
| FAM228A   | 2p23.3   | 0.025244 | 0.622822 | 0.70903  |
| MRGPRE    | 11p15.4  | 0.02524  | 0.622881 | 0.709057 |
| LGALS1    | 22q13.1  | 0.025232 | 0.622995 | 0.709146 |
| OAS1      | 12q24.13 | 0.025224 | 0.623105 | 0.709231 |
| ACOX2     | 3p14.3   | -0.02521 | 0.623306 | 0.709387 |
| TTC26     | 7q34     | -0.02521 | 0.623312 | 0.709387 |
| NPB       | 17q25.3  | 0.025199 | 0.623439 | 0.70949  |
| SLC50A1   | 1q22     | -0.02519 | 0.623526 | 0.709549 |
| LMO1      | 11p15.4  | -0.02518 | 0.623643 | 0.709642 |
| FANCE     | 6p21.31  | -0.02517 | 0.623832 | 0.709816 |
| PHF14     | 7p21.3   | 0.025168 | 0.623873 | 0.709823 |
| MANEAL    | 1p34.3   | -0.02515 | 0.624158 | 0.710079 |
| BRSK1     | 19q13.42 | -0.02515 | 0.624169 | 0.710079 |
| RNF214    | 11q23.3  | 0.025119 | 0.624543 | 0.710395 |
| MAGEC3    | Xq27.2   | 0.025119 | 0.624547 | 0.710395 |
| LYZL6     | 17q12    | -0.02512 | 0.624553 | 0.710395 |
| SSR1      | 6p24.3   | 0.025096 | 0.624859 | 0.710703 |
| TOMM70    | 3q12.2   | -0.02508 | 0.625034 | 0.710862 |
| SLN       | 11q22.3  | -0.02508 | 0.625141 | 0.710909 |
| BTNL2     | 6p21.32  | 0.025076 | 0.625147 | 0.710909 |
| POGLUT2   | 13q33.1  | -0.02507 | 0.625245 | 0.71098  |
| WASF1     | 6q21     | -0.02504 | 0.625638 | 0.711386 |
| ZNF548    | 19q13.43 | 0.025035 | 0.625709 | 0.711397 |
| VASP      | 19q13.32 | 0.025034 | 0.625718 | 0.711397 |
| SIX1      | 14q23.1  | 0.025026 | 0.625837 | 0.711491 |
| RPGRIP1   | 14q11.2  | 0.024998 | 0.626221 | 0.711888 |
| CETN4P    | 4q27     | 0.024962 | 0.626716 | 0.71241  |
| TRH       | 3q22.1   | 0.024957 | 0.626789 | 0.712453 |
| SCCPDH    | 1q44     | 0.02495  | 0.626877 | 0.712499 |
| ZNRF2     | 7p14.3   | 0.024949 | 0.626901 | 0.712499 |
| ROPN1L    | 5p15.2   | 0.024942 | 0.626997 | 0.712544 |
| GLIDR     | 9p12     | 0.024941 | 0.627011 | 0.712544 |
| MSLN      | 16p13.3  | -0.02493 | 0.627175 | 0.712689 |
| CT47B1    | Xq24     | -0.02492 | 0.627259 | 0.712744 |
| OR2G6     | 1q44     | 0.024896 | 0.627628 | 0.713123 |
| MRPL42P5  | 15q15.1  | 0.024885 | 0.627778 | 0.713252 |
| UPK3B     | 7q11.2   | -0.02488 | 0.627818 | 0.713257 |
| NKAIN1    | 1p35.2   | 0.024874 | 0.627933 | 0.713349 |

|           |          |          |          |          |
|-----------|----------|----------|----------|----------|
| PIWIL4    | 11q21    | -0.02487 | 0.627975 | 0.713356 |
| HIST2H2BA | 1p11.2   | 0.024806 | 0.628875 | 0.714338 |
| ARSF      | Xp22.33  | -0.0248  | 0.628934 | 0.714345 |
| TDRG1     | 6p21.2   | 0.0248   | 0.628953 | 0.714345 |
| LINC00112 | 21q22.3  | -0.02477 | 0.629391 | 0.714801 |
| SPHK1     | 17q25.1  | 0.024762 | 0.629477 | 0.714825 |
| SHPK      | 17p13.2  | 0.024762 | 0.629482 | 0.714825 |
| RNF39     | 6p22.1   | 0.024742 | 0.629764 | 0.715104 |
| ZFC3H1    | 12q21.1  | 0.024717 | 0.630102 | 0.715428 |
| IL17C     | 16q24.2  | -0.02472 | 0.630121 | 0.715428 |
| ARL2BP    | 16q13    | 0.024713 | 0.630165 | 0.715437 |
| SCN5A     | 3p22.2   | -0.0247  | 0.630291 | 0.71554  |
| ALKAL1    | 8q11.23  | -0.0247  | 0.630346 | 0.715561 |
| SHB       | 9p13.1   | -0.02467 | 0.6308   | 0.716037 |
| RBM5      | 3p21.31  | -0.02465 | 0.630982 | 0.716203 |
| NOVA2     | 19q13.32 | 0.024643 | 0.631125 | 0.716318 |
| PRKAG2    | 7q36.1   | 0.024641 | 0.631155 | 0.716318 |
| CD300LD   | 17q25.1  | 0.024625 | 0.631384 | 0.716537 |
| YEATS4    | 12q15    | -0.02462 | 0.631498 | 0.716626 |
| FAM138D   | 12p13.33 | -0.02461 | 0.631627 | 0.716728 |
| SNAPC5    | 15q22.31 | 0.024605 | 0.631659 | 0.716728 |
| ELOVL5    | 6p12.1   | -0.0246  | 0.631707 | 0.716741 |
| AKAIN1    | 18p11.31 | -0.02459 | 0.631808 | 0.716815 |
| DCTN1-AS1 | 2p13.1   | 0.024583 | 0.631964 | 0.716951 |
| PRDM9     | 5p14.2   | -0.02457 | 0.632093 | 0.717058 |
| DUSP27    | 1q24.1   | 0.024555 | 0.632345 | 0.717303 |
| HOXA7     | 7p15.2   | 0.024532 | 0.632668 | 0.717629 |
| CRYAB     | 11q23.1  | 0.024524 | 0.632776 | 0.71771  |
| ZNF487    | 10q11.21 | -0.02452 | 0.632813 | 0.717711 |
| LINC02249 | 15q13.2  | 0.024505 | 0.633043 | 0.717932 |
| TFAM      | 10q21.1  | 0.0245   | 0.633119 | 0.717977 |
| TNP2      | 16p13.13 | 0.024485 | 0.633321 | 0.718166 |
| PWWP2B    | 10q26.3  | -0.02448 | 0.633406 | 0.718221 |
| DNAJB11   | 3q27.3   | -0.02447 | 0.633496 | 0.718252 |
| API5      | 11p12    | 0.024472 | 0.633505 | 0.718252 |
| NANOG     | 12p13.31 | 0.024404 | 0.63445  | 0.719283 |
| KAZALD1   | 10q24.31 | 0.0244   | 0.634506 | 0.719285 |
| ODF3L1    | 15q24.2  | 0.024394 | 0.634581 | 0.719285 |
| SYNGR3    | 16p13.3  | -0.02439 | 0.634582 | 0.719285 |
| OR10Z1    | 1q23.1   | -0.02439 | 0.634629 | 0.719285 |
| TENT4B    | 16q12.1  | -0.02439 | 0.634632 | 0.719285 |
| LKAAEAR1  | 20q13.33 | -0.02439 | 0.634673 | 0.719291 |
| RTL1      | 14q32.2  | -0.02437 | 0.634936 | 0.71952  |
| DPEP3     | 16q22.1  | 0.024367 | 0.63496  | 0.71952  |
| CA4       | 17q23.1  | 0.024365 | 0.634982 | 0.71952  |
| TRIM3     | 11p15.4  | 0.024357 | 0.635095 | 0.719597 |
| PLIN3     | 19p13.3  | 0.024355 | 0.635122 | 0.719597 |
| NLRP4     | 19q13.43 | 0.024339 | 0.635342 | 0.719798 |
| PDE6C     | 10q23.33 | 0.024337 | 0.635372 | 0.719798 |
| RNF10     | 12q24.31 | 0.024304 | 0.635828 | 0.720274 |
| DYDC2     | 10q23.1  | -0.02427 | 0.63631  | 0.720735 |
| TMEM242   | 6q25.3   | -0.02427 | 0.636376 | 0.720735 |
| NOMO3     | 16p13.11 | 0.024265 | 0.636376 | 0.720735 |
| TRNP1     | 1p36.11  | -0.02426 | 0.636379 | 0.720735 |
| TRIM49    | 11q14.3  | 0.024251 | 0.636568 | 0.720908 |
| TTY7      | Yp11.2   | -0.02423 | 0.636862 | 0.721201 |
| TAP2      | 6p21.32  | -0.02421 | 0.637074 | 0.7214   |
| SOX2-OT   | 3q26.33  | 0.024208 | 0.637174 | 0.721472 |

|           |          |          |          |          |
|-----------|----------|----------|----------|----------|
| C4ORF51   | 4q31.21  | 0.024195 | 0.637348 | 0.721629 |
| RIT2      | 18q12.3  | 0.02418  | 0.637554 | 0.721821 |
| FAM53C    | 5q31.2   | -0.02416 | 0.637802 | 0.722061 |
| ZNF226    | 19q13.31 | -0.02413 | 0.638254 | 0.722532 |
| MKRN3     | 15q11.2  | 0.02412  | 0.638388 | 0.722643 |
| LINC00207 | 22q13.31 | 0.024104 | 0.638623 | 0.722838 |
| NEK10     | 3p24.1   | -0.0241  | 0.638632 | 0.722838 |
| TMEM74    | 8q23.1   | 0.024087 | 0.638849 | 0.723042 |
| PIH1D3    | Xq22.3   | -0.02408 | 0.638892 | 0.72305  |
| PCDHA13   | 5q31.3   | 0.024077 | 0.638994 | 0.723125 |
| SIX6      | 14q23.1  | 0.024067 | 0.639137 | 0.723245 |
| TRIM74    | 7q11.23  | -0.02405 | 0.639405 | 0.723507 |
| SGSM3     | 22q13.1  | 0.024024 | 0.639738 | 0.723844 |
| PRKCD     | 3p21.1   | 0.024021 | 0.639774 | 0.723844 |
| NUDT6     | 4q28.1   | 0.024014 | 0.639867 | 0.723908 |
| PIGP      | 21q22.13 | -0.02399 | 0.640147 | 0.724183 |
| NSD2      | 4p16.3   | 0.02397  | 0.640483 | 0.724523 |
| SYNDIG1L  | 14q24.3  | 0.023946 | 0.640825 | 0.724869 |
| OR11H6    | 14q11.2  | 0.023936 | 0.640952 | 0.724972 |
| RTL8B     | Xq26.3   | 0.023914 | 0.641266 | 0.725286 |
| CRISP2    | 6p12.3   | 0.023907 | 0.641366 | 0.725304 |
| SSX5      | Xp11.23  | 0.023905 | 0.641391 | 0.725304 |
| CFAP299   | 4q21.21  | -0.02391 | 0.641391 | 0.725304 |
| LANCL2    | 7p11.2   | -0.02389 | 0.641543 | 0.725435 |
| DDI1      | 11q22.3  | 0.023883 | 0.641693 | 0.725564 |
| FAM217A   | 6p25.2   | 0.023875 | 0.641805 | 0.72565  |
| LINC00158 | 21q21.2  | -0.02387 | 0.641864 | 0.725665 |
| SLC2A4    | 17p13.1  | -0.02387 | 0.641891 | 0.725665 |
| MSTO2P    | 1q22     | -0.02386 | 0.641999 | 0.725746 |
| PMEPA1    | 20q13.31 | 0.023829 | 0.642447 | 0.726211 |
| CRTC1     | 19p13.11 | -0.02382 | 0.642579 | 0.72632  |
| LRRC8D    | 1p22.2   | -0.0238  | 0.642802 | 0.72653  |
| MLNR      | 13q14.2  | 0.023746 | 0.643606 | 0.727398 |
| PDGFA     | 7p22.3   | -0.02371 | 0.644089 | 0.727899 |
| OR2F1     | 7q35     | 0.023707 | 0.644151 | 0.727899 |
| OR5K2     | 3q11.2   | 0.023707 | 0.644158 | 0.727899 |
| GPR156    | 3q13.33  | 0.023695 | 0.644329 | 0.728051 |
| LINC00588 | 8q12.1   | -0.02369 | 0.644403 | 0.728079 |
| DPY19L4   | 8q22.1   | -0.02369 | 0.644462 | 0.728079 |
| HSD3B1    | 1p12     | 0.023685 | 0.644463 | 0.728079 |
| SEC14L2   | 22q12.2  | -0.02368 | 0.644601 | 0.728193 |
| AXDND1    | 1q25.2   | 0.023664 | 0.644758 | 0.72833  |
| SSTR5-AS1 | 16p13.3  | 0.023658 | 0.644846 | 0.728389 |
| IFI27L2   | 14q32.12 | 0.023652 | 0.644932 | 0.728425 |
| LRRTM1    | 2p12     | 0.02365  | 0.64495  | 0.728425 |
| FEV       | 2q35     | 0.023637 | 0.645138 | 0.72856  |
| TBX20     | 7p14.2   | 0.023636 | 0.645143 | 0.72856  |
| CST5      | 20p11.21 | 0.023598 | 0.645678 | 0.729123 |
| PRKACA    | 19p13.12 | -0.02359 | 0.645805 | 0.729225 |
| SKINT1L   | 1p33     | 0.023579 | 0.645946 | 0.729297 |
| RTN4R     | 22q11.21 | -0.02358 | 0.645955 | 0.729297 |
| TYMSOS    | 18p11.32 | -0.02358 | 0.645978 | 0.729297 |
| FAM71F1   | 7q32.1   | -0.02357 | 0.646026 | 0.729311 |
| NAT8B     | 2p13.1   | 0.02357  | 0.646069 | 0.729318 |
| CD70      | 19p13.3  | -0.02355 | 0.646374 | 0.729621 |
| TMEM63C   | 14q24.3  | 0.023527 | 0.646673 | 0.729917 |
| FAM178B   | 2q11.2   | -0.02352 | 0.64677  | 0.729986 |
| SLC2A6    | 9q34.2   | 0.023515 | 0.646844 | 0.730028 |

|            |                 |          |          |          |
|------------|-----------------|----------|----------|----------|
| CHPF       | 2q35            | -0.02351 | 0.646935 | 0.730089 |
| CAMK2B     | 7p13            | 0.0235   | 0.647052 | 0.730178 |
| OTOS       | 2q37.3          | -0.0235  | 0.647086 | 0.730178 |
| PFN1       | 17p13.2         | -0.02349 | 0.647191 | 0.730255 |
| COL9A1     | 6q13            | 0.023483 | 0.647293 | 0.730328 |
| ZNF20      | 19p13.2         | 0.023473 | 0.647435 | 0.730448 |
| OTOA       | 16p12.2 16p12.2 | -0.02344 | 0.647836 | 0.730859 |
| SLC31A1    | 9q32            | 0.023427 | 0.648068 | 0.73108  |
| CDKN1B     | 12p13.1         | -0.02341 | 0.64837  | 0.731379 |
| SREK1IP1   | 5q12.3          | -0.02339 | 0.648575 | 0.73157  |
| ZBP1       | 20q13.31        | -0.02337 | 0.64885  | 0.731838 |
| SENP3      | 17p13.1         | -0.02336 | 0.649079 | 0.732056 |
| VWA8       | 13q14.11        | -0.02335 | 0.64914  | 0.732082 |
| SYNGAP1    | 6p21.32         | 0.023348 | 0.649176 | 0.732082 |
| OR8D4      | 11q24.1         | 0.023339 | 0.649303 | 0.732149 |
| AKTIP      | 16q12.2         | -0.02334 | 0.649309 | 0.732149 |
| SMIM21     | 18q23           | -0.0233  | 0.649797 | 0.732632 |
| SLC1A4     | 2p14            | -0.0233  | 0.64981  | 0.732632 |
| MMS22L     | 6q16.1          | 0.023294 | 0.649937 | 0.732708 |
| KCNA4      | 11p14.1         | -0.02329 | 0.64995  | 0.732708 |
| SGCG       | 13q12.12        | 0.023271 | 0.650258 | 0.732975 |
| CCL1       | 17q12           | -0.02327 | 0.65026  | 0.732975 |
| SAXO1      | 9p22.1          | 0.023267 | 0.650319 | 0.733    |
| FAM13A-AS1 | 4q22.1          | 0.023264 | 0.650367 | 0.733013 |
| NNMT       | 11q23.2         | 0.023248 | 0.650589 | 0.733156 |
| PRSS38     | 1q42.13         | -0.02325 | 0.650601 | 0.733156 |
| USP6       | 17p13.2         | 0.023247 | 0.650604 | 0.733156 |
| CDKN2A-DT  | 9p21.3          | -0.02323 | 0.650835 | 0.733375 |
| C12ORF74   | 12q22           | 0.023215 | 0.651053 | 0.733579 |
| XRCC5      | 2q35            | 0.023204 | 0.651206 | 0.73371  |
| NCAPD3     | 11q25           | -0.0232  | 0.651314 | 0.733782 |
| C4ORF45    | 4q32.1          | -0.02319 | 0.651343 | 0.733782 |
| FRMPD1     | 9p13.2          | 0.02319  | 0.651405 | 0.73381  |
| CRHR1      | 17q21.31        | -0.02318 | 0.651536 | 0.733917 |
| NR2E1      | 6q21            | -0.02315 | 0.651953 | 0.734346 |
| WFS1       | 4p16.1          | -0.02314 | 0.652043 | 0.734405 |
| CDR2       | 16p12.2         | -0.02313 | 0.652173 | 0.734446 |
| FAM181A    | 14q32.12        | 0.023134 | 0.652179 | 0.734446 |
| LMX1A      | 1q23.3          | -0.02313 | 0.652189 | 0.734446 |
| SPRR2A     | 1q21.3          | 0.02313  | 0.652244 | 0.734467 |
| SSTR2      | 17q25.1         | 0.023115 | 0.652454 | 0.734662 |
| TDP1       | 14q32.11        | 0.023108 | 0.652551 | 0.73473  |
| NUDT16P1   | 3q22.1          | -0.02309 | 0.652793 | 0.734932 |
| ALAS2      | Xp11.21         | 0.02309  | 0.652804 | 0.734932 |
| SUN1       | 7p22.3          | -0.02308 | 0.652935 | 0.735038 |
| MEIOB      | 16p13.3         | 0.023063 | 0.653179 | 0.735259 |
| USP10      | 16q24.1         | 0.023061 | 0.653204 | 0.735259 |
| OR10H2     | 19p13.12        | -0.02306 | 0.653244 | 0.735262 |
| QPCT       | 2p22.2          | 0.023051 | 0.653356 | 0.735347 |
| CEP104     | 1p36.32         | 0.023042 | 0.653483 | 0.735448 |
| WDR66      | 12q24.31        | -0.02302 | 0.653731 | 0.735686 |
| TPP2       | 13q33.1         | -0.02302 | 0.65377  | 0.735689 |
| SLCO6A1    | 5q21.1          | -0.023   | 0.654008 | 0.735915 |
| SPANXN3    | Xq27.3          | -0.023   | 0.654126 | 0.736007 |
| OR5H6      | 3q11.2          | -0.02299 | 0.654183 | 0.736008 |
| DYNLL2     | 17q22           | -0.02299 | 0.6542   | 0.736008 |
| MKRN1      | 7q34            | 0.022971 | 0.654479 | 0.73628  |
| LINC00239  | 14q32.31        | 0.022953 | 0.65473  | 0.736521 |

|             |                 |          |          |          |
|-------------|-----------------|----------|----------|----------|
| LCE1C       | 1q21.3          | -0.02294 | 0.654956 | 0.736734 |
| RAB26       | 16p13.3         | 0.022898 | 0.655501 | 0.737306 |
| LHFPL1      | Xq23            | 0.022895 | 0.655551 | 0.73732  |
| RGS12       | 4p16.3          | 0.022885 | 0.655688 | 0.737432 |
| LAMC3       | 9q34.12         | 0.022868 | 0.655924 | 0.737657 |
| OR4F6       | 15q26.3         | -0.02285 | 0.656118 | 0.737833 |
| CCDC172     | 10q25.3         | -0.02282 | 0.656648 | 0.738388 |
| CLEC1B      | 12p13.31-p13.2  | -0.02281 | 0.656759 | 0.73847  |
| GRIK1-AS1   | 21q21.3         | 0.022806 | 0.656798 | 0.73847  |
| CCDC102A    | 16q21           | -0.0228  | 0.656843 | 0.73847  |
| DPRX        | 19q13.42        | -0.0228  | 0.656896 | 0.73847  |
| OTOL1       | 3q26.1          | -0.0228  | 0.656905 | 0.73847  |
| LINC00922   | 16q21           | 0.022788 | 0.657054 | 0.738596 |
| KCTD4       | 13q14.12-q14.13 | 0.022781 | 0.65715  | 0.738662 |
| MAEL        | 1q24.1          | -0.02277 | 0.65734  | 0.738834 |
| MARK1       | 1q41            | -0.02276 | 0.657483 | 0.738953 |
| FAM111A     | 11q12.1         | 0.022741 | 0.657714 | 0.739129 |
| CCDC169     | 13q13.3         | 0.022741 | 0.657717 | 0.739129 |
| DHX16       | 6p21.33         | 0.022739 | 0.65775  | 0.739129 |
| CCNQP1      | 1q32.1          | 0.02273  | 0.65787  | 0.739222 |
| BPIFA2      | 20q11.21        | 0.022715 | 0.658084 | 0.739422 |
| ABCC1       | 16p13.11        | 0.022691 | 0.658421 | 0.739758 |
| SIT1        | 9p13.3          | 0.022686 | 0.658484 | 0.739788 |
| CEP295      | 11q21           | -0.02268 | 0.658591 | 0.739866 |
| PGAM2       | 7p13            | 0.022669 | 0.65873  | 0.739982 |
| ZFY         | Yp11.2          | 0.02266  | 0.658862 | 0.740087 |
| CD200R1L    | 3q13.2          | 0.022645 | 0.659073 | 0.740284 |
| NLRP10      | 11p15.4         | 0.022637 | 0.659186 | 0.740357 |
| TNFRSF10B   | 8p21.3          | 0.022633 | 0.659244 | 0.740357 |
| ZNF347      | 19q13.42        | 0.022632 | 0.65925  | 0.740357 |
| OR7C1       | 19p13.12        | 0.022623 | 0.659373 | 0.740454 |
| DEFA5       | 8p23.1          | -0.02261 | 0.659627 | 0.740698 |
| NDC80       | 18p11.32        | 0.022603 | 0.659666 | 0.7407   |
| BBOX1       | 11p14.2         | -0.0226  | 0.659744 | 0.740746 |
| WDR60       | 7q36.3          | -0.02257 | 0.660065 | 0.741066 |
| SBF1P1      | 8q12.1          | -0.02256 | 0.6602   | 0.741175 |
| OR1S2       | 11q12.1         | -0.02253 | 0.660658 | 0.741565 |
| OR7G3       | 19p13.2         | -0.02253 | 0.660658 | 0.741565 |
| GPR139      | 16p12.3         | 0.022532 | 0.660658 | 0.741565 |
| SCPEP1      | 17q22           | -0.02252 | 0.660821 | 0.741706 |
| ARV1        | 1q42.2          | -0.02252 | 0.660866 | 0.741715 |
| HSP90AB2P   | 4p15.33         | -0.02251 | 0.661    | 0.741824 |
| ZNF614      | 19q13.41        | -0.0225  | 0.661088 | 0.741881 |
| TAS2R40     | 7q34            | -0.02249 | 0.661277 | 0.742023 |
| BAK1        | 6p21.31         | -0.02249 | 0.661289 | 0.742023 |
| GRAMD1A     | 19q13.11        | -0.02246 | 0.661634 | 0.742369 |
| FAM151A     | -               | -0.02244 | 0.661897 | 0.742623 |
| TRIM37      | 17q22           | 0.022423 | 0.662202 | 0.742922 |
| GAGE8       | Xp11            | 0.022411 | 0.662372 | 0.743043 |
| CPO         | 2q33.3          | -0.02241 | 0.662439 | 0.743043 |
| LIPK        | 10q23.31        | 0.022404 | 0.662475 | 0.743043 |
| GTF2H2C     | 5q13.2          | -0.0224  | 0.662491 | 0.743043 |
| C11ORF86    | 11q13.2         | 0.022402 | 0.662495 | 0.743043 |
| PRLHR       | 10q26.11        | 0.022396 | 0.662579 | 0.743096 |
| NKX6-3      | 8p11.21         | 0.022391 | 0.662655 | 0.743105 |
| PDCL2       | 4q12            | 0.022389 | 0.662682 | 0.743105 |
| COL18A1-AS1 | 21q22.3         | 0.022386 | 0.662726 | 0.743105 |
| C12ORF42    | 12q23.2-q23.3   | -0.02239 | 0.662735 | 0.743105 |

|             |              |          |          |          |
|-------------|--------------|----------|----------|----------|
| SPDYE2      | 7q22.1       | 0.022383 | 0.662772 | 0.743105 |
| CASTOR3     | 7q22.1       | -0.02236 | 0.663098 | 0.743399 |
| C20ORF202   | 20p13        | -0.02236 | 0.663108 | 0.743399 |
| GRB2        | 17q25.1      | 0.02231  | 0.663806 | 0.744139 |
| AQP4-AS1    | 18q11.2      | 0.022305 | 0.663877 | 0.744176 |
| OPALIN      | 10q24.1      | -0.0223  | 0.663977 | 0.744247 |
| OR6V1       | 7q34         | -0.02229 | 0.664036 | 0.744272 |
| FBXW4       | 10q24.32     | 0.022271 | 0.664354 | 0.744568 |
| CMTM2       | 16q21        | 0.022269 | 0.664375 | 0.744568 |
| ANKRD20A20P | 9q13         | 0.022251 | 0.664635 | 0.744818 |
| FAM66C      | 12p13.31     | 0.022246 | 0.664714 | 0.744865 |
| BRINP1      | 9q33.1       | -0.02223 | 0.664864 | 0.744991 |
| ZNF75D      | Xq26.3       | -0.0222  | 0.665299 | 0.745419 |
| ITGA7       | 12q13.2      | 0.022203 | 0.66532  | 0.745419 |
| CYTH3       | 7p22.1       | 0.022191 | 0.665488 | 0.745565 |
| SEPTIN1     | 16p11.2      | -0.02219 | 0.66557  | 0.745616 |
| OR9K2       | 12q13.2      | -0.02218 | 0.665637 | 0.745625 |
| GNL3L       | Xp11.22      | 0.022179 | 0.665652 | 0.745625 |
| DCAF8L1     | Xp21.3       | 0.022171 | 0.665769 | 0.745713 |
| GTF2B       | 1p22.2       | 0.022158 | 0.665951 | 0.745876 |
| PCLAF       | 15q22.31     | 0.022143 | 0.666168 | 0.746062 |
| ZNF570      | 19q13.12     | 0.022141 | 0.666192 | 0.746062 |
| KRTAP1-3    | 17q21.2      | -0.02214 | 0.666259 | 0.746095 |
| ARHGEF1     | 19q13.2      | -0.0221  | 0.666781 | 0.746638 |
| OR51B2      | 11p15.4      | -0.0221  | 0.666825 | 0.746646 |
| SNORA2B     | 12q13.11     | -0.02209 | 0.666898 | 0.746685 |
| MOSMO       | 16p12.2      | 0.022082 | 0.667028 | 0.74679  |
| LINC00320   | 21q21.1      | -0.02207 | 0.667231 | 0.746975 |
| HTR6        | 1p36.13      | 0.022042 | 0.667599 | 0.747313 |
| MIP         | 12q13.3      | -0.02204 | 0.667619 | 0.747313 |
| SAA3P       | 11p15.1      | -0.02204 | 0.667645 | 0.747313 |
| ZNF839      | 14q32.31     | 0.022032 | 0.667733 | 0.747367 |
| OR5M10      | 11q12.1      | -0.02203 | 0.667809 | 0.747367 |
| CT45A1      | Xq26.3       | -0.02203 | 0.667816 | 0.747367 |
| NAT8L       | 4p16.3       | 0.022025 | 0.667843 | 0.747367 |
| C20ORF85    | 20q13.32     | -0.02202 | 0.667964 | 0.747462 |
| HBA1        | 16p13.3      | 0.021999 | 0.668211 | 0.747696 |
| ZNF518B     | 4p16.1       | -0.02199 | 0.66835  | 0.74781  |
| PCAT4       | 4q21.21      | 0.021984 | 0.668414 | 0.74784  |
| GPR62       | 3p21.2       | -0.02196 | 0.668713 | 0.748098 |
| STRC        | 15q15.3      | 0.02196  | 0.668754 | 0.748098 |
| LCT         | 2q21.3       | 0.02196  | 0.668757 | 0.748098 |
| ITIH3       | 3p21.1       | -0.02196 | 0.66881  | 0.748115 |
| BMP4        | 14q22.2      | 0.021944 | 0.668982 | 0.748266 |
| KCMF1       | 2p11.2       | -0.02194 | 0.669086 | 0.748307 |
| CYP24A1     | 20q13.2      | 0.021937 | 0.669093 | 0.748307 |
| AIM2        | 1q23.1-q23.2 | 0.021933 | 0.669141 | 0.748319 |
| ACCSL       | 11p11.2      | -0.02192 | 0.669307 | 0.748462 |
| ACADS       | 12q24.31     | 0.021914 | 0.66941  | 0.748536 |
| LOC645752   | 15q24.3      | 0.021901 | 0.669595 | 0.748694 |
| PATE4       | 11q24.2      | 0.021899 | 0.669627 | 0.748694 |
| BCO1        | 16q23.2      | 0.021885 | 0.669825 | 0.748875 |
| TMEM107     | 17p13.1      | -0.02185 | 0.670315 | 0.74938  |
| GRM7        | 3p26.1       | 0.02182  | 0.670744 | 0.749818 |
| UGT2B7      | 4q13.2       | 0.021804 | 0.670975 | 0.750035 |
| MMP7        | 11q22.2      | -0.02178 | 0.671278 | 0.750331 |
| ZSCAN20     | 1p35.1       | 0.021775 | 0.671382 | 0.750406 |
| KCNE2       | 21q22.11     | -0.02175 | 0.671705 | 0.750725 |



|           |                |          |          |          |
|-----------|----------------|----------|----------|----------|
| CCDC174   | 3p25.1         | 0.021736 | 0.671942 | 0.750948 |
| CCL16     | 17q12          | 0.021724 | 0.672119 | 0.751079 |
| LINC00271 | 6q23.3         | 0.021722 | 0.672134 | 0.751079 |
| LRRC34    | 3q26.2         | 0.021718 | 0.672196 | 0.751106 |
| NAALAD2   | 11q14.3        | 0.021715 | 0.672245 | 0.751107 |
| FAM72A    | 1q32.1         | -0.02171 | 0.672272 | 0.751107 |
| EIF3C     | 16p11.2        | 0.021708 | 0.672346 | 0.751148 |
| LRP8      | 1p32.3         | 0.021657 | 0.673059 | 0.751899 |
| GTF2A1L   | 2p16.3         | -0.02166 | 0.673094 | 0.751899 |
| PXDNL     | 8q11.22-q11.23 | -0.02162 | 0.673574 | 0.752394 |
| OR4F15    | 15q26.3        | 0.021603 | 0.67383  | 0.752638 |
| C8ORF86   | 8p11.22        | 0.021576 | 0.674219 | 0.753031 |
| ZNF605    | 12q24.33       | -0.02156 | 0.674444 | 0.753239 |
| SLC22A8   | 11q12.3        | -0.02155 | 0.674581 | 0.753323 |
| RETNLB    | 3q13.13        | 0.02155  | 0.674594 | 0.753323 |
| PSG3      | 19q13.2        | 0.021543 | 0.674687 | 0.753385 |
| SUMO3     | 21q22.3        | -0.02153 | 0.674888 | 0.753568 |
| LINC00662 | 19q11          | 0.021525 | 0.674937 | 0.75358  |
| CACNG5    | 17q24.2        | 0.021521 | 0.674998 | 0.753607 |
| C5ORF38   | 5p15.33        | 0.021486 | 0.675493 | 0.754117 |
| AP2M1     | 3q27.1         | -0.02147 | 0.675744 | 0.754355 |
| SHROOM1   | 5q31.1         | -0.02146 | 0.675873 | 0.754456 |
| TERB2     | 15q21.1        | -0.02143 | 0.676236 | 0.754819 |
| DDX53     | Xp22.11        | -0.02141 | 0.676593 | 0.755177 |
| FGF4      | 11q13.3        | 0.021399 | 0.676743 | 0.755302 |
| CAPSL     | 5p13.2         | 0.021382 | 0.676979 | 0.755523 |
| DENND2D   | 1p13.3-p13.2   | 0.021376 | 0.677063 | 0.755575 |
| PDC       | 1q31.1         | 0.021357 | 0.677335 | 0.755835 |
| NHEG1     | 6q23.3         | 0.021344 | 0.677518 | 0.755998 |
| HMGGA2    | 12q14.3        | -0.02132 | 0.677861 | 0.756339 |
| SLC5A12   | 11p14.2        | -0.02131 | 0.678009 | 0.756462 |
| GABRD     | 1p36.33        | 0.021302 | 0.678122 | 0.756546 |
| CORO6     | 17q11.2        | -0.02129 | 0.678337 | 0.756743 |
| AZIN1     | 8q22.3         | 0.021284 | 0.678386 | 0.756756 |
| FGF16     | Xq21.1         | -0.02127 | 0.678526 | 0.75687  |
| C1D       | 2p14           | 0.021262 | 0.678697 | 0.757018 |
| TAS2R7    | 12p13.2        | 0.021252 | 0.678835 | 0.757123 |
| SEPTIN9   | 17q25.3        | 0.02125  | 0.678869 | 0.757123 |
| LRFN2     | 6p21.2-p21.1   | 0.021247 | 0.678904 | 0.757123 |
| OR2F2     | 7q35           | 0.021241 | 0.678999 | 0.757187 |
| NMU       | 4q12           | -0.02123 | 0.679213 | 0.757344 |
| HLA-H     | 6p22.1         | -0.02123 | 0.679216 | 0.757344 |
| HSP90B3P  | 1p22.1         | 0.021218 | 0.679325 | 0.757384 |
| NSMCE3    | 15q13.1        | 0.021214 | 0.679379 | 0.757384 |
| SNAR-C4   | 19q13.33       | -0.02121 | 0.679391 | 0.757384 |
| RBM33     | 7q36.3         | -0.02121 | 0.679403 | 0.757384 |
| NBPF15    | 1q21.1         | 0.021177 | 0.679907 | 0.757896 |
| MFAP3L    | 4q33           | 0.021175 | 0.679938 | 0.757896 |
| SFXN2     | 10q24.32       | 0.021147 | 0.680341 | 0.758303 |
| BEST4     | 1p34.1         | 0.021139 | 0.680447 | 0.75834  |
| CNTNAP5   | 2q14.3         | -0.02114 | 0.68045  | 0.75834  |
| ZNF79     | 9q33.3         | 0.021133 | 0.680532 | 0.758353 |
| ADM2      | 22q13.33       | -0.02113 | 0.680538 | 0.758353 |
| TTC29     | 4q31.22        | 0.021122 | 0.680692 | 0.758483 |
| LINC02610 | 2q37.3         | -0.02112 | 0.680772 | 0.758511 |
| AGAP11    | 10q23.2        | -0.02111 | 0.680793 | 0.758511 |
| ARC       | 8q24.3         | 0.021104 | 0.680945 | 0.758638 |
| ADGRB2    | 1p35.2         | 0.0211   | 0.681007 | 0.758665 |

|           |              |          |          |          |
|-----------|--------------|----------|----------|----------|
| TRIM31    | 6p22.1       | -0.02107 | 0.681384 | 0.759043 |
| TADA2A    | 17q12        | -0.02106 | 0.681522 | 0.75914  |
| BTN2A1    | 6p22.2       | -0.02106 | 0.681547 | 0.75914  |
| TMEM170A  | 16q23.1      | -0.02106 | 0.681602 | 0.759159 |
| SH3TC1    | 4p16.1       | 0.021035 | 0.681941 | 0.759494 |
| KRT80     | 12q13.13     | -0.02099 | 0.682522 | 0.7601   |
| RBMXL3    | Xq23         | 0.020973 | 0.682826 | 0.760386 |
| SLC26A10  | 12q13.3      | 0.020969 | 0.682872 | 0.760386 |
| PRSS3P2   | 7q34         | -0.02097 | 0.682893 | 0.760386 |
| REG1CP    | 2p12         | -0.02096 | 0.682954 | 0.760412 |
| AGPAT3    | 21q22.3      | 0.020943 | 0.683252 | 0.760701 |
| ACVR2A    | 2q22.3-q23.1 | 0.020927 | 0.683486 | 0.760877 |
| TREX2     | Xq28         | -0.02093 | 0.683486 | 0.760877 |
| EEF2      | 19p13.3      | 0.020904 | 0.68381  | 0.761195 |
| KRTAP10-5 | 21q22.3      | 0.020896 | 0.683926 | 0.761282 |
| IFT81     | 12q24.11     | 0.020883 | 0.684105 | 0.761439 |
| THUMPD3   | 3p25.3       | 0.020879 | 0.68417  | 0.761469 |
| BTF3L4    | 1p32.3       | -0.02087 | 0.684303 | 0.761574 |
| TUBBP6    | 7p11.2       | 0.020851 | 0.684568 | 0.761827 |
| GORASP1   | 3p22.2       | -0.02083 | 0.68486  | 0.76211  |
| PRKCG     | 19q13.42     | 0.02082  | 0.685018 | 0.762243 |
| DNAH10    | 12q24.31     | -0.0208  | 0.685252 | 0.762461 |
| OR5A1     | 11q12.1      | -0.02079 | 0.68548  | 0.762672 |
| NUP58     | 13q12.13     | 0.020781 | 0.685563 | 0.762723 |
| HMG5      | Xq21.1       | -0.02078 | 0.685637 | 0.762763 |
| OR2AT4    | 11q13.4      | -0.02076 | 0.685873 | 0.762983 |
| STMN4     | 8p21.2       | 0.020755 | 0.685949 | 0.763025 |
| SMC1B     | 22q13.31     | -0.02074 | 0.686109 | 0.76316  |
| SPATA4    | 4q34.2       | -0.02073 | 0.686307 | 0.763338 |
| CDK5R1    | 17q11.2      | -0.02072 | 0.686439 | 0.763443 |
| IFI30     | 19p13.11     | -0.02071 | 0.686594 | 0.763572 |
| C9ORF135  | 9q21.12      | 0.02068  | 0.687019 | 0.764003 |
| ZMPSTE24  | 1p34.2       | 0.02067  | 0.687162 | 0.764119 |
| AMOTL2    | 3q22.2       | 0.020663 | 0.687266 | 0.764162 |
| PSG5      | 19q13.31     | 0.020662 | 0.687277 | 0.764162 |
| POTEG     | 14q11.2      | 0.020653 | 0.687401 | 0.764259 |
| CRPPA     | 7p21.2       | -0.02065 | 0.687504 | 0.764306 |
| SRSF11    | 1p31.1       | 0.020643 | 0.68755  | 0.764306 |
| HYLS1     | 11q24.2      | 0.020642 | 0.687569 | 0.764306 |
| CAPZB     | 1p36.13      | -0.02064 | 0.687597 | 0.764306 |
| DYNC1L1   | 3p22.3       | 0.02061  | 0.688023 | 0.764737 |
| ZC2HC1C   | 14q24.3      | -0.0206  | 0.688168 | 0.764856 |
| NES       | 1q23.1       | -0.02059 | 0.688353 | 0.76502  |
| OR8D2     | 11q24.2      | 0.020567 | 0.688639 | 0.765146 |
| BPY2      | Yq11.223     | -0.02057 | 0.688648 | 0.765146 |
| SCP2D1    | 20p11.23     | 0.020566 | 0.688656 | 0.765146 |
| CNOT3     | 19q13.42     | -0.02057 | 0.688656 | 0.765146 |
| SEBOX     | 17q11.2      | -0.02057 | 0.688658 | 0.765146 |
| CREB3     | 9p13.3       | -0.02055 | 0.688835 | 0.7653   |
| RPL13AP17 | 7q21.11      | -0.02055 | 0.688951 | 0.765387 |
| NGF       | 1p13.2       | -0.02054 | 0.689063 | 0.765468 |
| FAM153A   | 5q35.3       | 0.020522 | 0.68929  | 0.765678 |
| MMP17     | 12q24.33     | 0.020479 | 0.689898 | 0.766311 |
| SCN1A     | 2q24.3       | 0.020473 | 0.689987 | 0.766367 |
| PECR      | 2q35         | -0.02046 | 0.690118 | 0.76647  |
| ZNF880    | 19q13.41     | -0.02046 | 0.690164 | 0.766479 |
| PRAME     | 22q11.22     | 0.020457 | 0.690211 | 0.766489 |
| KRBA1     | 7q36.1       | 0.020443 | 0.690421 | 0.766679 |

|           |                |          |          |          |
|-----------|----------------|----------|----------|----------|
| SNORA28   | 14q32.32       | -0.02044 | 0.690485 | 0.766708 |
| TRPM6     | 9q21.13        | 0.020401 | 0.691024 | 0.767214 |
| C1ORF61   | 1q22           | -0.0204  | 0.691097 | 0.767214 |
| ZBBX      | 3q26.1         | -0.0204  | 0.691105 | 0.767214 |
| MYLK4     | 6p25.2         | -0.02039 | 0.691124 | 0.767214 |
| TRIM26    | 6p22.1         | -0.02039 | 0.691132 | 0.767214 |
| MIR205HG  | 1q32.2         | 0.02039  | 0.691182 | 0.767216 |
| CHST4     | 16q22.2        | 0.020388 | 0.691211 | 0.767216 |
| ILK       | 11p15.4        | -0.02038 | 0.691321 | 0.767295 |
| CER1      | 9p22.3         | -0.02037 | 0.691441 | 0.767386 |
| ABCA2     | 9q34.3         | -0.02036 | 0.691676 | 0.767605 |
| CBX1      | 17q21.32       | -0.02034 | 0.691908 | 0.76782  |
| SLC10A1   | 14q24.1        | -0.02033 | 0.692005 | 0.767859 |
| SPANXC    | Xq27.2         | -0.02033 | 0.69202  | 0.767859 |
| ATF7IP2   | 16p13.2-p13.13 | -0.02029 | 0.692685 | 0.768555 |
| METAP2    | 12q22          | 0.020278 | 0.692787 | 0.7686   |
| IL2RG     | Xq13.1         | 0.020277 | 0.692803 | 0.7686   |
| FOXI3     | 2p11.2         | -0.02027 | 0.692891 | 0.768654 |
| ATAD5     | 17q11.2        | 0.020258 | 0.693082 | 0.768785 |
| GLIS3-AS1 | 9p24.2         | 0.020258 | 0.693085 | 0.768785 |
| JARID2    | 6p22.3         | 0.020251 | 0.693178 | 0.768816 |
| PCBP1     | 2p13.3         | 0.02025  | 0.69319  | 0.768816 |
| ACSM2B    | 16p12.3        | -0.02024 | 0.693287 | 0.768881 |
| FAM110C   | 2p25.3         | 0.020235 | 0.693405 | 0.76897  |
| OR10H4    | 19p13.12       | -0.02021 | 0.693775 | 0.769338 |
| CATSPER1  | 11q13.1        | 0.02019  | 0.694058 | 0.769609 |
| VRK3      | 19q13.33       | -0.02019 | 0.694119 | 0.769634 |
| CFTR      | 7q31.2         | 0.020176 | 0.694252 | 0.769739 |
| TTBK1     | 6p21.1         | -0.02017 | 0.694358 | 0.769813 |
| FAR2P1    | 2q21.1         | -0.02017 | 0.694399 | 0.769816 |
| PNP       | 14q11.2        | 0.020162 | 0.69446  | 0.769841 |
| DPY19L2P4 | 7q21.13        | -0.02016 | 0.694547 | 0.769895 |
| IL17RE    | 3p25.3         | 0.020138 | 0.694801 | 0.770134 |
| RIOX2     | 3q11.2         | -0.02009 | 0.695442 | 0.770802 |
| TRMT10A   | 4q23           | 0.020088 | 0.695529 | 0.770856 |
| PLEK2     | 14q23.3-q24.1  | 0.020069 | 0.695793 | 0.771105 |
| KRTAP2-4  | 17q21.2        | 0.020058 | 0.695954 | 0.77124  |
| ALX3      | 1p13.3         | -0.02006 | 0.695991 | 0.77124  |
| OR13H1    | Xq26.2         | -0.02004 | 0.696219 | 0.771423 |
| SLC39A1   | 1q21.3         | 0.020039 | 0.696233 | 0.771423 |
| C9ORF72   | 9p21.2         | -0.02003 | 0.696368 | 0.771529 |
| PMVK      | 1q21.3         | -0.02002 | 0.69655  | 0.771688 |
| JUP       | 17q21.2        | -0.02001 | 0.696658 | 0.771765 |
| KCNK16    | 6p21.2         | 0.019998 | 0.696824 | 0.771906 |
| GLB1L     | 2q35           | 0.019988 | 0.696968 | 0.772024 |
| DBX1      | 11p15.1        | -0.01998 | 0.697081 | 0.772106 |
| UQCRC2    | 16p12.2        | -0.01998 | 0.697151 | 0.772141 |
| MT2A      | 16q13          | -0.01994 | 0.697695 | 0.7727   |
| SLC10A5   | 8q21.13        | 0.019922 | 0.697918 | 0.772905 |
| RTN4RL2   | 11q12.1        | -0.01991 | 0.698072 | 0.773032 |
| TBATA     | 10q22.1        | -0.01991 | 0.698141 | 0.773066 |
| SCD       | 10q24.31       | 0.019891 | 0.698365 | 0.773271 |
| MROH9     | 1q24.3         | -0.01988 | 0.698555 | 0.773439 |
| PPEF1     | Xp22.13        | 0.019875 | 0.6986   | 0.773446 |
| KRTAP12-3 | 21q22.3        | 0.019872 | 0.698641 | 0.773449 |
| APOB      | 2p24.1         | 0.019867 | 0.698715 | 0.773453 |
| GART      | 21q22.11       | -0.01987 | 0.698722 | 0.773453 |
| TRAPPC13  | 5q12.3         | -0.01985 | 0.698937 | 0.773593 |

|           |             |          |          |          |
|-----------|-------------|----------|----------|----------|
| SCFD2     | 4q12        | -0.01985 | 0.698943 | 0.773593 |
| ELF3      | 1q32.1      | 0.019849 | 0.698965 | 0.773593 |
| TTF2      | 1p13.1      | -0.01985 | 0.699017 | 0.773609 |
| CSTA      | 3q21.1      | 0.019825 | 0.699319 | 0.773899 |
| SNX3      | 6q21        | 0.019814 | 0.699477 | 0.774032 |
| NLRP8     | 19q13.43    | 0.019811 | 0.699523 | 0.774039 |
| TYK2      | 19p13.2     | 0.019808 | 0.699561 | 0.774039 |
| LINC00596 | 14q11.2     | 0.019801 | 0.699667 | 0.774081 |
| C16ORF92  | 16p11.2     | -0.0198  | 0.699677 | 0.774081 |
| CEP290    | 12q21.32    | 0.019787 | 0.699859 | 0.774241 |
| CFAP300   | 11q22.1     | -0.01977 | 0.700077 | 0.774439 |
| CCDC27    | 1p36.32     | -0.01975 | 0.70033  | 0.774677 |
| PLEKHM2   | 1p36.21     | 0.019747 | 0.70044  | 0.774732 |
| SPANXN1   | Xq27.3      | 0.019745 | 0.700472 | 0.774732 |
| S100A9    | 1q21.3      | 0.019743 | 0.700496 | 0.774732 |
| ZNF773    | 19q13.43    | -0.01974 | 0.700574 | 0.774775 |
| IGFBP2    | 2q35        | 0.019724 | 0.700767 | 0.774945 |
| RAB9A     | Xp22.2      | 0.019715 | 0.7009   | 0.77505  |
| OR7G2     | 19p13.2     | 0.019696 | 0.701177 | 0.775313 |
| ICAM5     | 19p13.2     | 0.019687 | 0.701303 | 0.77541  |
| ALDH18A1  | 10q24.1     | 0.019667 | 0.701591 | 0.775667 |
| STOML3    | 13q13.3     | -0.01967 | 0.701613 | 0.775667 |
| FAM95B1   | 9p11.2      | -0.01966 | 0.701694 | 0.775714 |
| IGDCC3    | 15q22.31    | 0.019643 | 0.701946 | 0.775908 |
| LMOD2     | 7q31.32     | -0.01964 | 0.701976 | 0.775908 |
| ESF1      | 20p12.1     | 0.01964  | 0.701986 | 0.775908 |
| COG3      | 13q14.13    | -0.01963 | 0.702179 | 0.776035 |
| RASSF4    | 10q11.21    | -0.01963 | 0.702179 | 0.776035 |
| LINC00326 | 6q23.2      | 0.019615 | 0.702353 | 0.776185 |
| COMMD8    | 4p12        | -0.0196  | 0.702537 | 0.776306 |
| HS2ST1    | 1p22.3      | -0.0196  | 0.702561 | 0.776306 |
| CD63      | 12q13.2     | -0.0196  | 0.702593 | 0.776306 |
| TIMM21    | 18q22.3     | 0.019596 | 0.702617 | 0.776306 |
| CNTN5     | 11q22.1     | 0.019589 | 0.702727 | 0.776385 |
| FBXL13    | 7q22.1      | 0.019585 | 0.702776 | 0.776396 |
| SEPTIN5   | 22q11.21    | -0.01958 | 0.702845 | 0.776428 |
| OR10A3    | 11p15.4     | 0.019565 | 0.703068 | 0.776633 |
| G6PC      | 17q21.31    | 0.019551 | 0.703278 | 0.776805 |
| EVA1C     | 21q22.11    | 0.019549 | 0.703302 | 0.776805 |
| DPY19L2P2 | 7q22.1      | 0.019528 | 0.703613 | 0.777106 |
| ASIC2     | 17q11.2-q12 | -0.01952 | 0.703737 | 0.777192 |
| SPATA41   | 15q26.3     | 0.019517 | 0.703769 | 0.777192 |
| BSX       | 11q24.1     | 0.019501 | 0.703999 | 0.777403 |
| MOB3C     | 1p33        | -0.01948 | 0.704271 | 0.77766  |
| ST6GAL2   | 2q12.3      | 0.019478 | 0.704334 | 0.777688 |
| P3H1      | 1p34.2      | -0.01946 | 0.704591 | 0.777929 |
| RRBP1     | 20p12.1     | 0.019441 | 0.704862 | 0.778185 |
| NT5DC1    | 6q22.1      | 0.019425 | 0.705096 | 0.7784   |
| GLS       | 2q32.2      | -0.01942 | 0.705146 | 0.778412 |
| PLAU      | 10q22.2     | 0.019414 | 0.705249 | 0.778478 |
| ABHD13    | 13q33.3     | -0.01941 | 0.705299 | 0.778478 |
| CSAG2     | Xq28        | -0.01941 | 0.705322 | 0.778478 |
| ADCY10    | 1q24.2      | 0.019374 | 0.705837 | 0.778896 |
| S100A10   | 1q21.3      | 0.019373 | 0.705844 | 0.778896 |
| NTSR2     | 2p25.1      | 0.019373 | 0.705849 | 0.778896 |
| GTF2E1    | 3q13.33     | 0.019373 | 0.705856 | 0.778896 |
| KCNK4     | 11q13.1     | 0.019363 | 0.705991 | 0.779002 |
| MT1H      | 16q13       | 0.019354 | 0.706127 | 0.779109 |

|              |                 |          |          |          |
|--------------|-----------------|----------|----------|----------|
| OR2T4        | 1q44            | 0.019325 | 0.706541 | 0.779485 |
| TMBIM4       | 12q14.3         | 0.019325 | 0.706545 | 0.779485 |
| ZNF295-AS1   | 21q22.3         | 0.019315 | 0.706683 | 0.77953  |
| KDM5C        | Xp11.22         | -0.01931 | 0.706704 | 0.77953  |
| DKFZP434A062 | 9q34.3          | 0.019313 | 0.706713 | 0.77953  |
| IKZF5        | 10q26.13        | 0.019311 | 0.706748 | 0.77953  |
| C17ORF99     | 17q25.3         | 0.019309 | 0.706782 | 0.77953  |
| CTSZ         | 20q13.32        | -0.01928 | 0.707191 | 0.779897 |
| CT47A11      | Xq24            | -0.01928 | 0.707192 | 0.779897 |
| HSD17B12     | 11p11.2         | -0.01926 | 0.707428 | 0.780103 |
| MYH8         | 17p13.1         | 0.019262 | 0.707457 | 0.780103 |
| MMP27        | 11q22.2         | 0.019234 | 0.707869 | 0.780514 |
| GADD45A      | 1p31.3          | 0.019227 | 0.707958 | 0.78057  |
| CNTF         | 11q12.1         | -0.01917 | 0.708857 | 0.781518 |
| RAD17        | 5q13.2          | 0.019121 | 0.709499 | 0.782183 |
| LINC00426    | 13q12.3         | 0.019111 | 0.709641 | 0.782296 |
| SLCO5A1      | 8q13.3          | 0.019108 | 0.709692 | 0.78231  |
| STRIP1       | 1p13.3          | 0.019092 | 0.709925 | 0.782523 |
| NRIP3        | 11p15.4         | -0.01908 | 0.710081 | 0.782653 |
| TLK2         | 17q23.2         | 0.019077 | 0.710137 | 0.782671 |
| TTC36        | 11q23.3         | -0.01907 | 0.710288 | 0.782706 |
| FUT5         | 19p13.3         | 0.019065 | 0.71031  | 0.782706 |
| PRKACG       | 9q21.11         | -0.01906 | 0.710318 | 0.782706 |
| YPEL1        | 22q11.21-q11.22 | 0.019064 | 0.710325 | 0.782706 |
| CRCT1        | 1q21.3          | -0.01906 | 0.710418 | 0.782766 |
| IL6          | 7p15.3          | -0.01903 | 0.71075  | 0.783088 |
| MPP2         | 17q21.31        | 0.019022 | 0.710934 | 0.783248 |
| MCF2L        | 13q34           | 0.019013 | 0.711072 | 0.783356 |
| CST7         | 20p11.21        | -0.019   | 0.711198 | 0.783453 |
| FAM210A      | 18p11.21        | 0.018966 | 0.711753 | 0.784021 |
| LINC00937    | 12p13.31        | -0.01896 | 0.711871 | 0.784096 |
| PPIB         | 15q22.31        | -0.01896 | 0.7119   | 0.784096 |
| PGK2         | 6p12.3          | 0.01894  | 0.712128 | 0.784299 |
| CCNG1        | 5q34            | 0.018938 | 0.712163 | 0.784299 |
| FBXO17       | 19q13.2         | 0.01892  | 0.712425 | 0.784533 |
| FAM182A      | 20p11.1         | 0.018918 | 0.712453 | 0.784533 |
| CNTD2        | 19q13.2         | -0.01891 | 0.712625 | 0.784645 |
| ABRA         | 8q23.1          | -0.01891 | 0.712633 | 0.784645 |
| GUCY2C       | 12p12.3         | 0.018901 | 0.712691 | 0.784665 |
| DHFR         | 5q14.1          | -0.01889 | 0.712854 | 0.784783 |
| GUCA1C       | 3q13.13         | -0.01889 | 0.712877 | 0.784783 |
| SNORA16A     | 1p35.3          | -0.01887 | 0.713114 | 0.785002 |
| GP5          | 3q29            | 0.018866 | 0.713209 | 0.785063 |
| APBB1        | 11p15.4         | 0.018862 | 0.71326  | 0.785076 |
| LCE1A        | 1q21.3          | -0.01885 | 0.713467 | 0.78526  |
| NSG1         | 4p16.3          | 0.018844 | 0.713523 | 0.785279 |
| FAM133B      | 7q21.2          | -0.01884 | 0.713623 | 0.785324 |
| LINC01553    | 10q21.2         | -0.01883 | 0.713681 | 0.785324 |
| HIST1H4K     | 6p22.1          | -0.01883 | 0.713706 | 0.785324 |
| DENND6B      | 22q13.33        | -0.01883 | 0.71372  | 0.785324 |
| IFNA17       | 9p21.3          | -0.01882 | 0.713934 | 0.785516 |
| POU4F3       | 5q32            | -0.0188  | 0.714122 | 0.785679 |
| GSTT1        | 22q11.23        | 0.0188   | 0.714164 | 0.785682 |
| RLN3         | 19p13.12        | 0.018797 | 0.714211 | 0.78569  |
| KMT5A        | 12q24.31        | 0.018794 | 0.714249 | 0.78569  |
| MAGEA10      | Xq28            | -0.01879 | 0.714322 | 0.785727 |
| DMRTC1B      | Xq13.1          | -0.01876 | 0.714706 | 0.786088 |
| OACYLP       | 18q21.32        | -0.01876 | 0.714729 | 0.786088 |

|              |                 |          |          |          |
|--------------|-----------------|----------|----------|----------|
| TPRXL        | 3p25.1          | -0.01875 | 0.714898 | 0.786231 |
| SLC13A2      | 17q11.2         | 0.018729 | 0.715202 | 0.786522 |
| TMEM38A      | 19p13.11        | -0.01871 | 0.715495 | 0.786801 |
| MMP25        | 16p13.3         | 0.018694 | 0.715708 | 0.786975 |
| FAM9C        | Xp22.2          | -0.01869 | 0.715732 | 0.786975 |
| RGS19        | 20q13.33        | 0.018687 | 0.715802 | 0.787009 |
| TAS2R39      | 7q34            | 0.018667 | 0.71609  | 0.787283 |
| RENBP        | Xq28            | -0.01864 | 0.716545 | 0.787716 |
| KRT82        | 12q13.13        | 0.018635 | 0.716563 | 0.787716 |
| UBE2DNL      | Xq21.1          | -0.01863 | 0.716673 | 0.787788 |
| MED31        | 17p13.1         | -0.01863 | 0.716708 | 0.787788 |
| EFCAB13      | 17q21.32        | -0.01862 | 0.716806 | 0.787854 |
| GPBP1        | 5q11.2          | 0.01861  | 0.716933 | 0.787916 |
| GALR3        | 22q13.1         | -0.01861 | 0.716942 | 0.787916 |
| SULT1C2      | 2q12.3          | 0.018605 | 0.717005 | 0.787943 |
| PIP4K2B      | 17q12           | 0.0186   | 0.717074 | 0.787975 |
| LINC01566    | 16p11.1         | -0.0186  | 0.717144 | 0.788008 |
| HNRNPCL3     | 1p36.21         | -0.01859 | 0.717204 | 0.788032 |
| C1ORF220     | 1q25.2          | 0.018581 | 0.717349 | 0.788147 |
| CERS1        | 19p13.11        | 0.01856  | 0.717649 | 0.788434 |
| DHRS4        | 14q11.2         | -0.01855 | 0.717789 | 0.788544 |
| WNT3         | 17q21.31-q21.32 | -0.0185  | 0.718545 | 0.789298 |
| DMD          | Xp21.2-p21.1    | -0.0185  | 0.718554 | 0.789298 |
| SCMH1        | 1p34.2          | -0.01848 | 0.718796 | 0.789448 |
| TBC1D17      | 19q13.33        | 0.018481 | 0.718802 | 0.789448 |
| CARMIL3      | 14q11.2         | 0.018481 | 0.718808 | 0.789448 |
| HIST1H1A     | 6p22.2          | -0.01847 | 0.718903 | 0.789509 |
| RPL34-AS1    | 4q25            | -0.01846 | 0.719086 | 0.789666 |
| DAND5        | 19p13.13        | -0.01844 | 0.719347 | 0.789906 |
| SPRR2C       | 1q21.3          | -0.01844 | 0.719402 | 0.789906 |
| CHIAP2       | 1p13.2          | 0.018439 | 0.719423 | 0.789906 |
| ZSCAN12      | 6p22.1          | 0.018423 | 0.719652 | 0.790115 |
| ZNF404       | 19q13.31        | -0.0184  | 0.719979 | 0.79043  |
| LOC100130691 | 2q31.2          | -0.0184  | 0.720029 | 0.790441 |
| SNAR-I       | 3q28            | -0.01835 | 0.720699 | 0.791134 |
| LINC00161    | 21q21.3         | 0.018342 | 0.72083  | 0.791234 |
| CEP55        | 10q23.33        | 0.018312 | 0.721266 | 0.791659 |
| KRT71        | 12q13.13        | -0.01831 | 0.721296 | 0.791659 |
| GGT1         | 22q11.23        | 0.018304 | 0.721389 | 0.791694 |
| APOBEC1      | 12p13.31        | -0.0183  | 0.721407 | 0.791694 |
| ITPK1-AS1    | 14q32.12        | -0.0183  | 0.721509 | 0.791762 |
| MOGAT1       | 2q36.1          | -0.01829 | 0.721594 | 0.791812 |
| ZFP2         | 5q35.3          | 0.018282 | 0.721706 | 0.791891 |
| SLC11A2      | 12q13.12        | 0.018272 | 0.721847 | 0.792003 |
| ACOT6        | 14q24.3         | -0.01823 | 0.722426 | 0.792595 |
| HRC          | 19q13.33        | 0.018204 | 0.722853 | 0.792984 |
| FMO9P        | 1q24.1          | -0.0182  | 0.72286  | 0.792984 |
| KRT222       | 17q21.2         | -0.01818 | 0.723126 | 0.793233 |
| HOXD11       | 2q31.1          | 0.018176 | 0.723252 | 0.793327 |
| RAPGEFL1     | 17q21.1         | -0.01815 | 0.723613 | 0.79368  |
| DDB1         | 11q12.2         | -0.01815 | 0.723701 | 0.793733 |
| KRTAP8-1     | 21q22.11        | -0.01814 | 0.723795 | 0.793793 |
| ZNF431       | 19p12           | -0.01813 | 0.723997 | 0.79397  |
| RBM12B-AS1   | 8q22.1          | 0.018119 | 0.724091 | 0.793987 |
| TSG1         | 6q16.1          | -0.01812 | 0.724092 | 0.793987 |
| POLA1        | Xp22.11-p21.3   | -0.01809 | 0.72456  | 0.794451 |
| IGLL1        | 22q11.23        | -0.01808 | 0.724594 | 0.794451 |
| RPS4Y1       | Yp11.2          | 0.018073 | 0.724758 | 0.794588 |

|              |               |          |          |          |
|--------------|---------------|----------|----------|----------|
| FAM72D       | 1q21.1        | -0.01805 | 0.725073 | 0.794889 |
| HPD          | 12q24.31      | -0.01802 | 0.725464 | 0.795275 |
| PRR23B       | 3q23          | -0.01801 | 0.725669 | 0.795456 |
| BCKDHB       | 6q14.1        | -0.01797 | 0.726256 | 0.796055 |
| RBM22        | 5q33.1        | -0.01794 | 0.726747 | 0.79655  |
| OR1A2        | 17p13.3       | 0.017901 | 0.727279 | 0.79709  |
| SNAR-F       | 19q13.33      | -0.01789 | 0.727486 | 0.797229 |
| HIST1H4G     | 6p22.2        | -0.01789 | 0.727486 | 0.797229 |
| CABP5        | 19q13.33      | 0.017878 | 0.727607 | 0.797318 |
| CCDC83       | 11q14.1-q14.2 | -0.01787 | 0.727763 | 0.797445 |
| RALGAPB      | 20q11.23      | -0.01786 | 0.72784  | 0.797447 |
| IGSF1        | Xq26.1        | 0.017862 | 0.727844 | 0.797447 |
| PKD1L2       | 16q23.2       | 0.017853 | 0.727973 | 0.797502 |
| HIGD1C       | 12q13.12      | 0.017852 | 0.72799  | 0.797502 |
| CSAG1        | Xq28          | 0.01785  | 0.728014 | 0.797502 |
| INTS10       | 8p21.3        | -0.01785 | 0.728057 | 0.797506 |
| ALDH7A1      | 5q23.2        | 0.017842 | 0.728142 | 0.797556 |
| XRCC6P5      | Xq22.1        | 0.017825 | 0.72839  | 0.797783 |
| ZBED2        | 3q13.13       | 0.017803 | 0.728708 | 0.798088 |
| KC6          | -             | -0.01779 | 0.728866 | 0.798218 |
| KNCN         | 1p33          | -0.01778 | 0.729003 | 0.798324 |
| FSCN2        | 17q25.3       | -0.01777 | 0.729137 | 0.798426 |
| HOXC12       | 12q13.13      | -0.01775 | 0.729514 | 0.798785 |
| PAQR3        | 4q21.21       | -0.01774 | 0.729583 | 0.798785 |
| DNAH7        | 2q32.3        | -0.01774 | 0.729608 | 0.798785 |
| IL18         | 11q23.1       | 0.017741 | 0.729624 | 0.798785 |
| SIKE1        | 1p13.2        | 0.017697 | 0.730267 | 0.799446 |
| NLK          | 17q11.2       | 0.017689 | 0.730381 | 0.799526 |
| TBX2         | 17q23.2       | -0.01768 | 0.73057  | 0.79969  |
| PRB3         | 12p13.2       | -0.01767 | 0.730719 | 0.799809 |
| TAX1BP1      | 7p15.2        | -0.01761 | 0.731542 | 0.800573 |
| SAT1         | Xp22.11       | 0.017609 | 0.731557 | 0.800573 |
| TMEM123      | 11q22.2       | 0.017608 | 0.731564 | 0.800573 |
| PPP1R14D     | 15q15.1       | -0.01761 | 0.731576 | 0.800573 |
| ZNF627       | 19p13.2       | -0.01758 | 0.731911 | 0.800895 |
| UGT1A5       | 2q37.1        | 0.01757  | 0.732115 | 0.801059 |
| SRP68        | 17q25.1       | 0.017567 | 0.732166 | 0.801059 |
| FLACC1       | 2q33.1        | 0.017564 | 0.732213 | 0.801059 |
| USP26        | Xq26.2        | 0.017563 | 0.732221 | 0.801059 |
| DNAJA1       | 9p21.1        | -0.01756 | 0.732309 | 0.801067 |
| YWHAZ        | 8q22.3        | 0.017557 | 0.732309 | 0.801067 |
| SMOC2        | 6q27          | 0.017546 | 0.732479 | 0.80121  |
| TNFRSF19     | 13q12.12      | -0.01749 | 0.733253 | 0.802013 |
| PGK1         | Xq21.1        | -0.01747 | 0.733537 | 0.802239 |
| CCND2        | 12p13.32      | 0.017473 | 0.73354  | 0.802239 |
| HP1BP3       | 1p36.12       | -0.01745 | 0.733834 | 0.802517 |
| ATP6V0E2-AS1 | 7q36.1        | -0.01745 | 0.733941 | 0.80259  |
| IL13RA2      | Xq23          | -0.01744 | 0.73405  | 0.802666 |
| TAS2R16      | 7q31.32 7q31  | 0.017422 | 0.734294 | 0.802845 |
| OR4K17       | 14q11.2       | 0.017422 | 0.734294 | 0.802845 |
| KLHL22       | 22q11.21      | 0.017418 | 0.734355 | 0.802868 |
| ZNF69        | 19p13.2       | -0.01741 | 0.734516 | 0.803    |
| BRDT         | 1p22.1        | -0.0174  | 0.734599 | 0.803047 |
| PARP3        | 3p21.2        | 0.017398 | 0.734643 | 0.80305  |
| CEP57L1      | 6q21          | 0.01738  | 0.734906 | 0.803295 |
| FAM66E       | 8p23.1        | -0.01735 | 0.735363 | 0.80375  |
| KDM5D        | Yq11.223      | 0.017337 | 0.73554  | 0.8039   |
| CHP2         | 16p12.2       | -0.01733 | 0.73559  | 0.803911 |

|           |                 |          |          |          |
|-----------|-----------------|----------|----------|----------|
| LGALS1    | 2p14            | 0.017325 | 0.73572  | 0.804009 |
| LINC01139 | 1q43            | 0.017318 | 0.735814 | 0.804067 |
| FAM81B    | 5q15            | 0.017314 | 0.735884 | 0.8041   |
| GDAP1     | 8q21.11         | 0.017299 | 0.7361   | 0.804292 |
| INSL5     | 1p31.3          | 0.017294 | 0.73618  | 0.804318 |
| TSGA10    | 2q11.2          | 0.017292 | 0.736204 | 0.804318 |
| CAD       | 2p23.3          | -0.01728 | 0.736407 | 0.804496 |
| GUSBP3    | 5q13.2          | -0.01727 | 0.736493 | 0.804504 |
| MT1L      | 16q13           | 0.017272 | 0.736495 | 0.804504 |
| LCE1E     | 1q21.3          | 0.017268 | 0.73655  | 0.804521 |
| MRGPRX4   | 11p15.1         | 0.017249 | 0.736827 | 0.80478  |
| KLHDC8B   | 3p21.31         | 0.017245 | 0.73689  | 0.804799 |
| WWC3      | Xp22.2          | 0.017243 | 0.736925 | 0.804799 |
| SH3GL3    | 15q25.2         | 0.017239 | 0.736981 | 0.804816 |
| OR1L3     | 9q33.2          | 0.017229 | 0.737126 | 0.804926 |
| PABPC1L2B | Xq13.2          | 0.017227 | 0.737162 | 0.804926 |
| CDRT4     | 17p12           | -0.01722 | 0.737251 | 0.804979 |
| KRT16     | 17q21.2         | 0.017215 | 0.737336 | 0.805028 |
| LINC00305 | 18q22.1         | -0.01721 | 0.737445 | 0.805094 |
| BTG4      | 11q23.1         | -0.0172  | 0.737495 | 0.805094 |
| VSIG10    | 12q24.23        | -0.0172  | 0.737517 | 0.805094 |
| ANKRD53   | 2p13.3          | 0.017173 | 0.737949 | 0.805522 |
| LRIG1     | 3p14.1          | 0.017169 | 0.738017 | 0.805539 |
| C1ORF74   | 1q32.2          | -0.01717 | 0.738045 | 0.805539 |
| FAM71B    | 5q33.3          | -0.01716 | 0.738125 | 0.805582 |
| RPP25     | 15q24.2         | -0.01714 | 0.738406 | 0.805845 |
| IFNA21    | 9p21.3          | 0.017139 | 0.738447 | 0.805846 |
| MACO1     | 1p36.11 1p36.11 | -0.01712 | 0.73877  | 0.806154 |
| RAB8A     | 19p13.11        | 0.017106 | 0.738935 | 0.80629  |
| KRTAP4-2  | 17q21.2         | -0.01709 | 0.73922  | 0.806555 |
| PABPC1L2A | Xq13.2          | -0.01708 | 0.739258 | 0.806555 |
| NME7      | 1q24.2          | 0.017069 | 0.739476 | 0.806742 |
| ODF4      | 17p13.1         | -0.01706 | 0.739546 | 0.806742 |
| PCOLCE2   | 3q23            | 0.017064 | 0.739551 | 0.806742 |
| MYO1H     | 12q24.11        | 0.017038 | 0.739942 | 0.807125 |
| AOC2      | 17q21.31        | -0.01703 | 0.740064 | 0.807214 |
| H1FOO     | 3q22.1          | 0.017024 | 0.740148 | 0.807262 |
| DHRS3     | 1p36.21         | -0.017   | 0.740468 | 0.807567 |
| PAEP      | 9q34.3          | -0.017   | 0.74055  | 0.807612 |
| TMEM183A  | 1q32.1          | -0.01698 | 0.740718 | 0.807709 |
| A2M-AS1   | 12p13.31        | 0.016985 | 0.74072  | 0.807709 |
| RNF167    | 17p13.2         | -0.01698 | 0.740819 | 0.807774 |
| MAATS1    | 3q13.33         | -0.01696 | 0.741072 | 0.808006 |
| POTEA     | 8p11.1          | -0.01696 | 0.741123 | 0.808017 |
| PC        | 11q13.2         | -0.01695 | 0.741261 | 0.808124 |
| ITGA2B    | 17q21.31        | -0.01694 | 0.741319 | 0.808143 |
| IGF2BP2   | 3q27.2          | -0.01693 | 0.741532 | 0.808332 |
| C1ORF87   | 1p32.1          | -0.01692 | 0.741646 | 0.808395 |
| KCNG4     | 16q24.1         | -0.01692 | 0.741671 | 0.808395 |
| HBD       | 11p15.4         | 0.016909 | 0.741837 | 0.808532 |
| PRELID2   | 5q32            | 0.016875 | 0.742335 | 0.80903  |
| KCNJ3     | 2q24.1          | 0.016868 | 0.742438 | 0.809099 |
| PPWD1     | 5q12.3          | 0.016845 | 0.742772 | 0.809419 |
| CAVIN3    | 11p15.4         | -0.01683 | 0.742959 | 0.809573 |
| MMP19     | 12q13.2         | 0.01683  | 0.742994 | 0.809573 |
| TXNL1     | 18q21.31        | -0.01682 | 0.743127 | 0.809674 |
| CASTOR2   | 7q11.23         | -0.01679 | 0.743598 | 0.810143 |
| GCM2      | 6p24.2          | -0.01678 | 0.743802 | 0.810321 |



|           |                   |          |          |          |
|-----------|-------------------|----------|----------|----------|
| C17ORF97  | 17p13.3           | 0.016767 | 0.743927 | 0.810412 |
| PGM5-AS1  | 9q21.11           | 0.01675  | 0.744174 | 0.810638 |
| FUT9      | 6q16.1            | -0.01673 | 0.744495 | 0.810943 |
| SCAF1     | 19q13.33          | -0.01672 | 0.744622 | 0.811037 |
| SMAD5-AS1 | 5q31.1            | -0.0167  | 0.744922 | 0.811296 |
| OLFM2     | 19p13.2           | 0.016696 | 0.744968 | 0.811296 |
| CLEC19A   | 16p12.3           | -0.01669 | 0.745    | 0.811296 |
| NLRC5     | 16q13             | -0.01669 | 0.745022 | 0.811296 |
| LDLRAD1   | 1p32.3            | 0.016686 | 0.745124 | 0.81136  |
| PRKAA2    | 1p32.2            | 0.016683 | 0.745162 | 0.81136  |
| MTHFS     | 15q25.1           | 0.016674 | 0.745295 | 0.811461 |
| GOLGA6C   | 15q24.2           | -0.01667 | 0.745379 | 0.811509 |
| TTY4C     | Yq11.23           | 0.016649 | 0.74566  | 0.811771 |
| PI15      | 8q21.13           | 0.016636 | 0.745858 | 0.811942 |
| MBTD1     | 17q21.33          | 0.01663  | 0.745952 | 0.811977 |
| ACOT1     | 14q24.3           | -0.01663 | 0.745971 | 0.811977 |
| RESP18    | 2q35              | 0.016622 | 0.746063 | 0.812033 |
| RUFY4     | 2q35              | 0.016616 | 0.74615  | 0.812084 |
| HAL       | 12q23.1           | 0.016605 | 0.746321 | 0.812225 |
| SEMA3F    | 3p21.31           | -0.0166  | 0.746432 | 0.812302 |
| ITIH6     | Xp11.22           | -0.01659 | 0.746593 | 0.81239  |
| LRR8E     | 19p13.2           | 0.016586 | 0.746594 | 0.81239  |
| SLC51A    | 3q29              | 0.016567 | 0.746873 | 0.81265  |
| PTBP2     | 1p21.3            | -0.01655 | 0.747183 | 0.812942 |
| ATP6V0D1  | 16q22.1           | -0.01653 | 0.747385 | 0.813118 |
| S1PR5     | 19p13.2           | 0.016525 | 0.747493 | 0.813191 |
| LIMD2     | 17q23.3           | 0.016521 | 0.747553 | 0.81321  |
| ENTPD2    | 9q34.3            | -0.01652 | 0.747591 | 0.81321  |
| HAVCR1P1  | 19p12             | 0.016508 | 0.747747 | 0.813336 |
| TMEM159   | 16p12.3           | 0.016489 | 0.74803  | 0.813599 |
| DENND1C   | 19p13.3           | 0.016484 | 0.748097 | 0.813611 |
| ZMYND10   | 3p21.31           | -0.01648 | 0.748122 | 0.813611 |
| HIST2H2BE | 1q21.2            | 0.016458 | 0.748481 | 0.813957 |
| LINC00957 | 7p13              | 0.016449 | 0.748615 | 0.814058 |
| PPP1R26   | 9q34.3            | 0.016446 | 0.748666 | 0.814069 |
| ANKRD22   | 10q23.31          | -0.01642 | 0.749057 | 0.81445  |
| ACP2      | 11p11.2 11p12-p11 | 0.016406 | 0.749251 | 0.814617 |
| HNMT      | 2q22.1            | -0.01637 | 0.749775 | 0.815143 |
| USP9Y     | Yq11.221          | 0.016349 | 0.750103 | 0.815433 |
| LINC02145 | 5p15.31           | 0.016347 | 0.750123 | 0.815433 |
| TM2D2     | 8p11.22           | -0.01634 | 0.750267 | 0.815495 |
| OR9A4     | 7q34              | -0.01634 | 0.750273 | 0.815495 |
| NUP210L   | 1q21.3            | 0.016335 | 0.750302 | 0.815495 |
|           | 4-Mar 2q35        | 0.016327 | 0.750426 | 0.815584 |
| ANXA6     | 5q33.1            | 0.016324 | 0.750466 | 0.815584 |
| USP29     | 19q13.43          | 0.016297 | 0.750867 | 0.815976 |
| CYP39A1   | 6p12.3            | -0.01629 | 0.750981 | 0.816055 |
| LRRCC1    | 8q21.2            | 0.016281 | 0.751105 | 0.816146 |
| DRC7      | 16q21             | 0.01626  | 0.751411 | 0.816434 |
| IMPA1     | 8q21.13           | 0.016255 | 0.751491 | 0.816476 |
| RNF222    | 17p13.1           | 0.016242 | 0.751672 | 0.816629 |
| LINC02112 | 5p15.31-p15.2     | -0.01622 | 0.752014 | 0.816921 |
| GOLGA6L10 | 15q25.2           | 0.016219 | 0.752022 | 0.816921 |
| PHYH      | 10p13             | -0.0162  | 0.752242 | 0.817115 |
| CT47A6    | Xq24              | -0.01619 | 0.752507 | 0.817358 |
| GJA8      | 1q21.2            | 0.016182 | 0.752562 | 0.817374 |
| PSMD2     | 3q27.1            | 0.016169 | 0.752755 | 0.817539 |
| ZBTB3     | 11q12.3           | -0.01615 | 0.753019 | 0.817782 |

|             |          |          |          |          |
|-------------|----------|----------|----------|----------|
| FRAT2       | 10q24.1  | -0.01615 | 0.753089 | 0.817813 |
| ATR         | 3q23     | 0.016118 | 0.753506 | 0.818222 |
| TAS2R13     | 12p13.2  | 0.016104 | 0.753715 | 0.818397 |
| HNRNPCL2    | 1p36.21  | -0.0161  | 0.753764 | 0.818397 |
| PRNT        | 20p13    | 0.016098 | 0.753815 | 0.818397 |
| TEX44       | 2q37.1   | -0.0161  | 0.753833 | 0.818397 |
| FEZF2       | 3p14.2   | 0.016094 | 0.753871 | 0.818397 |
| ASGR2       | 17p13.1  | 0.016083 | 0.754032 | 0.818527 |
| SLC4A1      | 17q21.31 | 0.01608  | 0.75408  | 0.818535 |
| ZNF205-AS1  | 16p13.3  | 0.016071 | 0.754206 | 0.818626 |
| IFNGR2      | 21q22.11 | 0.016068 | 0.754255 | 0.818636 |
| TMEM240     | 1p36.33  | 0.016055 | 0.754438 | 0.818766 |
| MYEOV       | 11q13.3  | -0.01605 | 0.754488 | 0.818766 |
| DUSP16      | 12p13.2  | 0.01605  | 0.75452  | 0.818766 |
| ACYP2       | 2p16.2   | -0.01605 | 0.754539 | 0.818766 |
| RBM24       | 6p22.3   | -0.01602 | 0.754956 | 0.819175 |
| GABRA6      | 5q34     | 0.016    | 0.755256 | 0.819456 |
| ORMDL2      | 12q13.2  | -0.01598 | 0.755514 | 0.819691 |
| GNAS-AS1    | 20q13.32 | -0.01597 | 0.7557   | 0.819849 |
| ABTB1       | 3q21.3   | -0.01596 | 0.755792 | 0.819887 |
| C7ORF65     | 7p12.3   | -0.01596 | 0.755817 | 0.819887 |
| COTL1       | 16q24.1  | -0.01596 | 0.75589  | 0.819922 |
| P2RY2       | 11q13.4  | 0.015947 | 0.756042 | 0.820042 |
| EIF2B2      | 14q24.3  | -0.01594 | 0.756212 | 0.820144 |
| ZACN        | 17q25.1  | -0.01594 | 0.756218 | 0.820144 |
| CACHD1      | 1p31.3   | 0.015906 | 0.756653 | 0.820571 |
| IQCH        | 15q23    | -0.0159  | 0.756732 | 0.820577 |
| LOC643923   | 11q22.3  | 0.015896 | 0.756795 | 0.820577 |
| KLHL29      | 2p24.1   | 0.015893 | 0.756847 | 0.820577 |
| TRIM29      | 11q23.3  | -0.01589 | 0.756857 | 0.820577 |
| PHF8        | Xp11.22  | 0.015892 | 0.756863 | 0.820577 |
| ZNF384      | 12p13.31 | -0.01588 | 0.757083 | 0.820771 |
| HMGXB4      | 22q12.3  | 0.01584  | 0.757632 | 0.821322 |
| CST4        | 20p11.21 | -0.01582 | 0.757898 | 0.821565 |
| MACC1       | 7p21.1   | 0.015807 | 0.758124 | 0.821735 |
| RABL2B      | 22q13.33 | 0.015804 | 0.758168 | 0.821735 |
| SYCE1       | 10q26.3  | 0.015803 | 0.758178 | 0.821735 |
| TSPYL2      | Xp11.22  | -0.01579 | 0.758395 | 0.821872 |
| TMIE        | 3p21.31  | -0.01579 | 0.758426 | 0.821872 |
| DNAJB1      | 19p13.12 | -0.01579 | 0.758427 | 0.821872 |
| ECEL1       | 2q37.1   | -0.01576 | 0.758761 | 0.822189 |
| VIPAS39     | 14q24.3  | 0.015735 | 0.75919  | 0.82261  |
| IGFBP4      | 17q21.2  | -0.01572 | 0.759385 | 0.822776 |
| HIST2H2BF   | 1q21.2   | 0.015711 | 0.759543 | 0.822903 |
| FAM167A-AS1 | 8p23.1   | -0.0157  | 0.759744 | 0.823077 |
| OR1E2       | 17p13.2  | -0.01568 | 0.760049 | 0.823362 |
| C10ORF88    | 10q26.13 | 0.015661 | 0.760282 | 0.82357  |
| FLVCR1-DT   | 1q32.3   | 0.015657 | 0.760346 | 0.823595 |
| ASCL3       | 11p15.4  | 0.015649 | 0.760456 | 0.823643 |
| KLKB1       | 4q35.2   | 0.015648 | 0.760472 | 0.823643 |
| OR1L1       | 9q33.2   | 0.015627 | 0.760788 | 0.82394  |
| TMSB15A     | Xq22.1   | 0.01562  | 0.760894 | 0.82401  |
| INO80C      | 18q12.2  | -0.01561 | 0.761094 | 0.824182 |
| ZNF493      | 19p12    | 0.015594 | 0.761276 | 0.824321 |
| TRIM41      | 5q35.3   | 0.015592 | 0.761305 | 0.824321 |
| CCDC181     | 1q24.2   | 0.015553 | 0.761889 | 0.824909 |
| GTPBP8      | 3q13.2   | 0.01554  | 0.762078 | 0.82507  |
| OR6C2       | 12q13.2  | 0.015527 | 0.762274 | 0.825192 |

|             |          |          |          |          |
|-------------|----------|----------|----------|----------|
| GSE1        | 16q24.1  | -0.01552 | 0.762305 | 0.825192 |
| PDS5B       | 13q13.1  | 0.015524 | 0.762315 | 0.825192 |
| COQ10A      | 12q13.3  | -0.01552 | 0.762417 | 0.825258 |
| RAB3IP      | 12q15    | 0.01551  | 0.762532 | 0.825338 |
| IER3        | 6p21.33  | -0.0155  | 0.762609 | 0.825377 |
| RABGGTA     | 14q12    | -0.0155  | 0.762673 | 0.825389 |
| TTY14       | Yq11.222 | -0.0155  | 0.762735 | 0.825389 |
| HSPB9       | 17q21.2  | -0.0155  | 0.762744 | 0.825389 |
| CCND1       | 11q13.3  | -0.01549 | 0.762865 | 0.825475 |
| PRAMEF20    | 1p36.21  | 0.015472 | 0.763085 | 0.825668 |
| CACNA1D     | 3p21.1   | -0.01545 | 0.76346  | 0.825986 |
| YIPF7       | 4p12     | -0.01545 | 0.763461 | 0.825986 |
| LCE5A       | 1q21.3   | -0.01544 | 0.763585 | 0.826014 |
| PF4         | 4q13.3   | -0.01544 | 0.763603 | 0.826014 |
| MAGEB2      | Xp21.2   | -0.01543 | 0.763643 | 0.826014 |
| FHOD1       | 16q22.1  | -0.01543 | 0.763651 | 0.826014 |
| KRT12       | 17q21.2  | -0.01543 | 0.763707 | 0.826022 |
| INSIG1      | 7q36.3   | -0.01543 | 0.763741 | 0.826022 |
| FAM160A2    | 11p15.4  | -0.01542 | 0.763885 | 0.826133 |
| KLF15       | 3q21.3   | 0.015413 | 0.763975 | 0.826185 |
| DEFB124     | 20q11.21 | 0.015407 | 0.764062 | 0.826196 |
| SBSN        | 19q13.12 | 0.015404 | 0.764096 | 0.826196 |
| C7ORF66     | 7q31.1   | -0.0154  | 0.764109 | 0.826196 |
| LRP2BP      | 4q35.1   | -0.01539 | 0.764248 | 0.826302 |
| ZNF131      | 5p12     | 0.015349 | 0.764918 | 0.826982 |
| CLDN14      | 21q22.13 | 0.015335 | 0.765126 | 0.827163 |
| MBD3L2      | 19p13.2  | -0.01531 | 0.765435 | 0.827452 |
| SLC25A12    | 2q31.1   | -0.01531 | 0.765498 | 0.827475 |
| KCTD16      | 5q31.3   | -0.0153  | 0.765587 | 0.827526 |
| OR6C68      | 12q13.2  | -0.0153  | 0.765642 | 0.827542 |
| WHRN        | 9q32     | 0.015282 | 0.76592  | 0.827753 |
| PROP1       | 5q35.3   | 0.015282 | 0.765921 | 0.827753 |
| DMBT1P1     | 10q26.13 | 0.015253 | 0.766346 | 0.828148 |
| YJEFN3      | 19p13.11 | -0.01525 | 0.766369 | 0.828148 |
| OR5J2       | 11q12.1  | -0.01524 | 0.766478 | 0.828221 |
| FAM181A-AS1 | 14q32.12 | -0.0152  | 0.767077 | 0.828824 |
| CTNS        | 17p13.2  | 0.015177 | 0.76748  | 0.829215 |
| PDYN        | 20p13    | -0.01514 | 0.768052 | 0.829762 |
| SERPINB10   | 18q22.1  | -0.01514 | 0.768078 | 0.829762 |
| PRDM11      | 11p11.2  | 0.015134 | 0.768111 | 0.829762 |
| PAQR6       | 1q22     | -0.01512 | 0.768307 | 0.829929 |
| LOC646813   | 11p11.12 | 0.015099 | 0.768637 | 0.830241 |
| TTY15       | Yq11.221 | -0.01509 | 0.768713 | 0.830278 |
| SMARCAL1    | 2q35     | -0.01509 | 0.768787 | 0.830314 |
| ZNF410      | 14q24.3  | 0.015082 | 0.768887 | 0.830375 |
| SERPINB3    | 18q21.33 | -0.01508 | 0.768928 | 0.830375 |
| GSTZ1       | 14q24.3  | -0.01506 | 0.769188 | 0.830605 |
| LYPD5       | 19q13.31 | -0.01506 | 0.769223 | 0.830605 |
| PPY2P       | 17q11.2  | 0.015054 | 0.76931  | 0.830654 |
| SPRR2D      | 1q21.3   | 0.015049 | 0.769387 | 0.830692 |
| UGT1A3      | 2q37.1   | 0.015042 | 0.769482 | 0.83075  |
| MDFI        | 6p21.1   | -0.01503 | 0.769701 | 0.830913 |
| PTMAP11     | 9q22.33  | 0.015027 | 0.769715 | 0.830913 |
| IFNA13      | 9p21.3   | 0.015021 | 0.769792 | 0.830929 |
| CCRL2       | 3p21.31  | -0.01502 | 0.769813 | 0.830929 |
| ZNF701      | 19q13.41 | 0.015009 | 0.769978 | 0.831062 |
| PFKL        | 21q22.3  | 0.014998 | 0.77014  | 0.831192 |
| TMED2       | 12q24.31 | 0.014983 | 0.770365 | 0.83139  |

|           |                 |          |          |          |
|-----------|-----------------|----------|----------|----------|
| IYD       | 6q25.1          | 0.014936 | 0.771064 | 0.832099 |
| EYA1      | 8q13.3          | -0.01493 | 0.771147 | 0.832144 |
| ZCCHC12   | Xq24            | -0.01492 | 0.771274 | 0.832236 |
| SCN4A     | 17q23.3         | 0.014917 | 0.771343 | 0.832266 |
| TRMT5     | 14q23.1         | -0.01491 | 0.7715   | 0.832391 |
| MUL1      | 1p36.12         | -0.0149  | 0.771555 | 0.832405 |
| SEMA3B    | 3p21.31         | -0.01489 | 0.771773 | 0.832595 |
| SIX5      | 19q13.32        | 0.014841 | 0.772476 | 0.833278 |
| AADAT     | 4q33            | 0.014841 | 0.772489 | 0.833278 |
| CYSTM1    | 5q31.3          | -0.01484 | 0.772547 | 0.833295 |
| LSM14A    | 19q13.11        | 0.014834 | 0.772591 | 0.833299 |
| FBXW7     | 4q31.3          | -0.01483 | 0.772704 | 0.833375 |
| EXD1      | 15q15.1         | -0.01481 | 0.772995 | 0.833628 |
| LINC00592 | 12q13.13        | 0.014803 | 0.773046 | 0.833628 |
| S100PBP   | 1p35.1          | -0.0148  | 0.773063 | 0.833628 |
| ELFN1     | 7p22.3          | 0.014779 | 0.77341  | 0.833957 |
| GPR119    | Xq26.1          | 0.014772 | 0.773504 | 0.834013 |
| IQCF1     | 3p21.2          | 0.01476  | 0.773688 | 0.834167 |
| GAK       | 4p16.3          | 0.014751 | 0.773821 | 0.834228 |
| RMI1      | 9q21.32         | 0.014749 | 0.77386  | 0.834228 |
| ZNF559    | 19p13.2         | 0.014748 | 0.773869 | 0.834228 |
| OR10G4    | 11q24.2         | 0.014745 | 0.773918 | 0.834235 |
| LHB       | 19q13.33        | 0.01474  | 0.773985 | 0.834262 |
| WDR88     | 19q13.11        | -0.01473 | 0.774191 | 0.83444  |
| CABCOCO1  | 10q21.2         | 0.014723 | 0.774243 | 0.83445  |
| A4GALT    | 22q13.2         | 0.014695 | 0.774659 | 0.834851 |
| LINC00652 | 20p11.23        | -0.01469 | 0.774697 | 0.834851 |
| AVPI1     | 10q24.2         | 0.014685 | 0.77481  | 0.834927 |
| IQCJ      | 3q25.32         | -0.01468 | 0.774913 | 0.834993 |
| CRYM      | 16p12.2         | 0.014673 | 0.774981 | 0.835021 |
| SPCS3     | 4q34.2          | 0.014659 | 0.775199 | 0.835212 |
| DENND5B   | 12p11.21        | 0.014654 | 0.775273 | 0.835246 |
| DSCAM     | 21q22.2         | -0.01464 | 0.775542 | 0.835411 |
| OR51A2    | 11p15.4         | -0.01463 | 0.775563 | 0.835411 |
| PYROXD1   | 12p12.1         | 0.014632 | 0.775598 | 0.835411 |
| IFNA2     | 9p21.3          | 0.01463  | 0.775628 | 0.835411 |
| LGALS13   | 19q13.2         | 0.01463  | 0.775634 | 0.835411 |
| RMDN1     | 8q21.3          | -0.01461 | 0.775855 | 0.835603 |
| SNORA2A   | 12q13.11        | -0.01461 | 0.775944 | 0.835654 |
| ZNF207    | 17q11.2         | -0.0146  | 0.776096 | 0.835756 |
| TMEM132C  | 12q24.32-q24.33 | 0.014594 | 0.776171 | 0.835756 |
| KRT78     | 12q13.13        | 0.014593 | 0.776179 | 0.835756 |
| XCL2      | 1q24.2          | 0.014591 | 0.776206 | 0.835756 |
| OR10C1    | 6p22.1          | -0.01458 | 0.776334 | 0.835849 |
| FYB2      | 1p32.2          | -0.01458 | 0.776379 | 0.835853 |
| ZNF821    | 16q22.2         | -0.01457 | 0.776526 | 0.835936 |
| SCGB1C1   | 11p15.5         | 0.014569 | 0.77654  | 0.835936 |
| POMC      | 2p23.3          | 0.014558 | 0.776712 | 0.836077 |
| SPATA45   | 1q32.3          | 0.014541 | 0.776955 | 0.836294 |
| ZNF233    | 19q13.31        | 0.014532 | 0.777091 | 0.836376 |
| FFAR1     | 19q13.12        | -0.01453 | 0.777115 | 0.836376 |
| FOXR2     | Xp11.21         | -0.01452 | 0.777286 | 0.836464 |
| SMG1P2    | 16p11.2         | 0.014519 | 0.777292 | 0.836464 |
| CTH       | 1p31.1          | -0.01452 | 0.777322 | 0.836464 |
| TNF       | 6p21.33         | 0.014504 | 0.777507 | 0.836618 |
| PHF1      | 6p21.32         | 0.014481 | 0.777858 | 0.836922 |
| ALDOA     | 16p11.2         | 0.014477 | 0.777909 | 0.836922 |
| GUCA2A    | 1p34.2          | 0.014477 | 0.777915 | 0.836922 |

|            |                |          |          |          |
|------------|----------------|----------|----------|----------|
| NPTXR      | 22q13.1        | 0.014472 | 0.777996 | 0.836964 |
| TNNT2      | 1q32.1         | 0.014467 | 0.77806  | 0.836988 |
| MTERF1     | 7q21.2         | -0.01446 | 0.778118 | 0.837006 |
| GBA2       | 9p13.3         | 0.014451 | 0.778301 | 0.837158 |
| ZNF302     | 19q13.11       | -0.01444 | 0.778414 | 0.837234 |
| GZMA       | 5q11.2         | -0.01442 | 0.778716 | 0.837514 |
| ABCC4      | 13q32.1        | -0.01442 | 0.778822 | 0.837583 |
| EFCAB6     | 22q13.2-q13.31 | -0.01441 | 0.778906 | 0.837588 |
| PDIA2      | 16p13.3        | 0.01441  | 0.778911 | 0.837588 |
| GAGE13     | Xp11.23        | -0.01438 | 0.779318 | 0.837945 |
| FAM47A     | Xp21.1         | -0.01438 | 0.779326 | 0.837945 |
| ANKRD20A9P | 13q11          | -0.01438 | 0.779423 | 0.838004 |
| DNAJB3     | 2q37.1         | -0.01436 | 0.779681 | 0.838237 |
| RAB3D      | 19p13.2        | -0.01434 | 0.779894 | 0.838421 |
| CRB2       | 9q33.3         | 0.014331 | 0.780097 | 0.838594 |
| SPX        | 12p12.1        | -0.01432 | 0.780278 | 0.83873  |
| KRTAP1-5   | 17q21.2        | -0.01432 | 0.780307 | 0.83873  |
| LZTS2      | 10q24.31       | 0.014312 | 0.78038  | 0.838763 |
| IL18BP     | 11q13.4        | 0.014308 | 0.780444 | 0.838787 |
| MTVR2      | 17q22          | 0.014303 | 0.780514 | 0.838817 |
| OR6A2      | 11p15.4        | -0.0143  | 0.78057  | 0.838832 |
| KIF20A     | 5q31.2         | -0.01429 | 0.780731 | 0.83896  |
| PDLIM1     | 10q23.33       | 0.014281 | 0.78085  | 0.839036 |
| SPICE1     | 3q13.2         | 0.014278 | 0.780886 | 0.839036 |
| LINC02396  | 12q13.12       | -0.01427 | 0.781027 | 0.839144 |
| ALDH1A1    | 9q21.13        | 0.014244 | 0.781394 | 0.839493 |
| HIGD1B     | 17q21.31       | -0.01424 | 0.781523 | 0.839586 |
| OPN1MW     | Xq28           | 0.014228 | 0.781632 | 0.839627 |
| HECTD3     | 1p34.1         | -0.01423 | 0.781645 | 0.839627 |
| OR2T3      | 1q44           | -0.01422 | 0.781756 | 0.839702 |
| NOLC1      | 10q24.32       | 0.01419  | 0.782206 | 0.840139 |
| FTSJ3      | 17q23.3        | 0.014167 | 0.782554 | 0.840468 |
| BIK        | 22q13.2        | -0.01415 | 0.782747 | 0.84063  |
| TAS2R4     | 7q34           | 0.014145 | 0.782876 | 0.840724 |
| DGCR5      | 22q11.21       | -0.01413 | 0.783086 | 0.840904 |
| NGLY1      | 3p24.2         | -0.01411 | 0.783359 | 0.841153 |
| PLEKHM1P1  | 17q24.1        | 0.014105 | 0.783479 | 0.841204 |
| CCL5       | 17q12          | 0.014104 | 0.783491 | 0.841204 |
| MICB       | 6p21.33        | 0.014083 | 0.783807 | 0.841479 |
| P2RY6      | 11q13.4        | -0.01408 | 0.783831 | 0.841479 |
| ASPDH      | 19q13.33       | 0.014072 | 0.783975 | 0.841558 |
| OR2T2      | 1q44           | -0.01407 | 0.783989 | 0.841558 |
| ASTE1      | 3q22.1         | 0.014065 | 0.784081 | 0.841612 |
| NPL        | 1q25.3         | 0.014061 | 0.784133 | 0.841622 |
| RAB29      | 1q32.1         | 0.014049 | 0.784317 | 0.841774 |
| BMPER      | 7p14.3         | 0.013996 | 0.785106 | 0.842577 |
| PIGA       | Xp22.2         | 0.013985 | 0.785277 | 0.842715 |
| PGBD4      | 15q14          | 0.013982 | 0.785326 | 0.842722 |
| WLS        | 1p31.3         | 0.013977 | 0.785393 | 0.842736 |
| GABRA4     | 4p12           | -0.01398 | 0.785423 | 0.842736 |
| FAM25A     | 10q23.2        | 0.013966 | 0.785554 | 0.842831 |
| ZDHHC1     | 16q22.1        | 0.013952 | 0.785776 | 0.843024 |
| CACNG7     | 19q13.42       | -0.01393 | 0.78612  | 0.843348 |
| AZIN2      | 1p35.1         | -0.01392 | 0.786213 | 0.843402 |
| H3F3B      | 17q25.1        | 0.013914 | 0.786345 | 0.843499 |
| SNORA4     | 3q27.3         | -0.0139  | 0.786587 | 0.843714 |
| EIF4E1B    | 5q35.2         | 0.013894 | 0.786632 | 0.843716 |
| FKBP1AP1   | 19q13.43       | -0.01386 | 0.787092 | 0.844165 |

|             |              |          |          |          |
|-------------|--------------|----------|----------|----------|
| SIM1        | 6q16.3       | -0.0138  | 0.788098 | 0.845199 |
| LURAP1L     | 9p23         | -0.01379 | 0.788252 | 0.845297 |
| LRRC10      | 12q15        | -0.01378 | 0.788319 | 0.845297 |
| PDLIM7      | 5q35.3       | 0.01378  | 0.788342 | 0.845297 |
| C2ORF50     | 2p25.1       | 0.013779 | 0.788358 | 0.845297 |
| SLC26A4-AS1 | 7q22.3       | 0.01377  | 0.788501 | 0.845404 |
| CIRBP-AS1   | 19p13.3      | -0.01376 | 0.788602 | 0.845468 |
| CDH24       | 14q11.2      | -0.01374 | 0.788936 | 0.845781 |
| CCDC71L     | 7q22.3       | -0.01374 | 0.788995 | 0.845798 |
| PTH         | 11p15.3      | -0.01373 | 0.789095 | 0.84586  |
| TMEM63A     | 1q42.12      | -0.01372 | 0.789253 | 0.845984 |
| OR5M3       | 11q12.1      | 0.013705 | 0.789468 | 0.846139 |
| CWF19L2     | 11q22.3      | 0.013704 | 0.789482 | 0.846139 |
| RIMBP2      | 12q24.33     | 0.013683 | 0.789808 | 0.846339 |
| AOX1        | 2q33.1       | 0.013681 | 0.789836 | 0.846339 |
| DOCK3       | 3p21.2       | -0.01368 | 0.789836 | 0.846339 |
| WFDC2       | 20q13.12     | 0.013681 | 0.789837 | 0.846339 |
| CXCL10      | 4q21.1       | -0.01367 | 0.790005 | 0.846459 |
| OR9Q1       | 11q12.1      | -0.01367 | 0.790053 | 0.846459 |
| SNCG        | 10q23.2      | -0.01366 | 0.790076 | 0.846459 |
| ITPRIPL1    | 2q11.2       | -0.01365 | 0.790309 | 0.846663 |
| STOML1      | 15q24.1      | -0.01364 | 0.790429 | 0.84671  |
| ELOA3       | 18q21.1      | -0.01363 | 0.79055  | 0.84671  |
| SCGB1D4     | 11q12.3      | 0.013632 | 0.790564 | 0.84671  |
| CSH1        | 17q23.3      | 0.013632 | 0.790564 | 0.84671  |
| TSPY1       | Yp11.2       | 0.013632 | 0.790564 | 0.84671  |
| STK35       | 20p13        | 0.013619 | 0.790758 | 0.846872 |
| ERCC5       | 13q33.1      | 0.013557 | 0.791692 | 0.847827 |
| ADRA1B      | 5q33.3       | -0.01354 | 0.792005 | 0.848103 |
| TAF4B       | 18q11.2      | -0.01353 | 0.792034 | 0.848103 |
| SLC25A51    | 9p13.2-p13.1 | 0.01352  | 0.792245 | 0.848215 |
| PSEN2       | 1q42.13      | -0.01352 | 0.792254 | 0.848215 |
| OLAH        | 10p13        | -0.01352 | 0.7923   | 0.848215 |
| DPY19L2P1   | 7p14.2       | -0.01351 | 0.792338 | 0.848215 |
| SPRR2G      | 1q21.3       | -0.01351 | 0.79235  | 0.848215 |
| OR6K3       | 1q23.1       | -0.0135  | 0.792538 | 0.84837  |
| HIST1H1C    | 6p22.2       | -0.01345 | 0.793247 | 0.849027 |
| GDF10       | 10q11.22     | -0.01345 | 0.793251 | 0.849027 |
| PRPF3       | 1q21.2       | -0.01345 | 0.793279 | 0.849027 |
| GYS2        | 12p12.1      | -0.01345 | 0.793334 | 0.849041 |
| SCGB2A2     | 11q12.3      | 0.013441 | 0.793434 | 0.849061 |
| OPN5        | 6p12.3       | 0.013439 | 0.793468 | 0.849061 |
| FUT6        | 19p13.3      | 0.013438 | 0.79348  | 0.849061 |
| TNFRSF4     | 1p36.33      | -0.01343 | 0.793633 | 0.84918  |
| NKG7        | 19q13.41     | 0.013423 | 0.793706 | 0.849212 |
| EMID1       | 22q12.2      | -0.01342 | 0.793797 | 0.849263 |
| YTHDF2      | 1p35.3       | 0.013414 | 0.793839 | 0.849263 |
| METTL18     | 1q24.2       | -0.01341 | 0.7939   | 0.849284 |
| MSANTD3     | 9q31.1       | -0.01341 | 0.793945 | 0.849287 |
| HCRTR1      | 1p35.2       | 0.013402 | 0.794014 | 0.849314 |
| MRPS11      | 15q25.3      | 0.0134   | 0.794055 | 0.849314 |
| SMIM10L2B   | Xq26.3       | 0.013396 | 0.794104 | 0.84932  |
| HEPN1       | 11q24.2      | -0.01339 | 0.794162 | 0.849337 |
| SZT2        | 1p34.2       | -0.01339 | 0.794272 | 0.849405 |
| IL17B       | 5q32         | -0.01338 | 0.79431  | 0.849405 |
| WASF3       | 13q12.13     | 0.013377 | 0.794392 | 0.849446 |
| TERF2IP     | 16q23.1      | -0.01336 | 0.794673 | 0.849672 |
| REG3A       | 2p12         | -0.01336 | 0.794688 | 0.849672 |

|           |                 |          |          |          |
|-----------|-----------------|----------|----------|----------|
| CPOX      | 3q11.2          | 0.013345 | 0.794874 | 0.849801 |
| OR13C5    | 9q31.1          | 0.013344 | 0.794893 | 0.849801 |
| DVL3      | 3q27.1          | 0.013309 | 0.795421 | 0.85032  |
| FSHR      | 2p16.3          | -0.01329 | 0.795691 | 0.850564 |
| HELT      | 4q35.1          | -0.01328 | 0.795799 | 0.850633 |
| BLOC1S5   | 6p24.3          | 0.013274 | 0.795942 | 0.85074  |
| HIP1R     | 12q24.31        | -0.01327 | 0.796065 | 0.850788 |
| MFSD2A    | 1p34.2          | 0.013266 | 0.796071 | 0.850788 |
| RAD21L1   | 20p13           | -0.01324 | 0.796382 | 0.851075 |
| DCT       | 13q32.1         | -0.01323 | 0.796617 | 0.85128  |
| RPS2P32   | 7p15.3          | 0.013193 | 0.797165 | 0.851821 |
| TXNDCC9   | 2q11.2          | -0.01319 | 0.797279 | 0.851897 |
| ANKRD26P3 | 13q12.11        | -0.01317 | 0.797468 | 0.852054 |
| RIPK3     | 14q12           | -0.01317 | 0.797513 | 0.852057 |
| SEMA4D    | 9q22.2          | -0.01315 | 0.797777 | 0.852293 |
| SC5D      | 11q23.3-q24.1   | 0.013123 | 0.798221 | 0.852722 |
| PHF20     | 20q11.22-q11.23 | -0.01309 | 0.798674 | 0.853125 |
| C12ORF71  | 12p11.23        | -0.01309 | 0.798684 | 0.853125 |
| DLX6-AS1  | 7q21.3          | -0.01308 | 0.798822 | 0.853227 |
| ERAP2     | 5q15            | 0.013079 | 0.798872 | 0.853235 |
| FAM66D    | 8p23.1          | -0.01307 | 0.799036 | 0.853334 |
| TTL       | 2q14.1          | -0.01307 | 0.79905  | 0.853334 |
| ZNF322P1  | 9q22.33         | -0.01306 | 0.799178 | 0.853403 |
| RASL11B   | 4q12            | -0.01306 | 0.799199 | 0.853403 |
| OXNAD1    | 3p25.1-p24.3    | -0.01305 | 0.799277 | 0.85344  |
| APOA4     | 11q23.3         | -0.01304 | 0.799422 | 0.853549 |
| HPCA      | 1p35.1          | 0.013021 | 0.799747 | 0.853802 |
| GUCY1B2   | 13q14.3         | -0.01302 | 0.799811 | 0.853802 |
| AGAP5     | 10q22.2         | -0.01302 | 0.79982  | 0.853802 |
| PRKY      | Yp11.2          | -0.01302 | 0.799829 | 0.853802 |
| ZKSCAN7   | 3p21.31         | 0.013009 | 0.799928 | 0.853862 |
| GNG11     | 7q21.3          | 0.012997 | 0.800116 | 0.854018 |
| TGIF2LY   | Yp11.2          | 0.012982 | 0.800334 | 0.854172 |
| TMEM65    | 8q24.13         | 0.012981 | 0.800346 | 0.854172 |
| GABARAPL3 | 15q26.1         | 0.012966 | 0.800586 | 0.854382 |
| CSN3      | 4q13.3          | -0.01296 | 0.800716 | 0.854447 |
| NFIL3     | 9q22.31         | -0.01296 | 0.800732 | 0.854447 |
| TAC4      | 17q21.33        | 0.012922 | 0.801235 | 0.854938 |
| HOXD13    | 2q31.1          | 0.012913 | 0.801375 | 0.855018 |
| SNORA37   | 18q21.2         | 0.012912 | 0.801395 | 0.855018 |
| VHLL      | 1q22            | 0.012903 | 0.801522 | 0.855107 |
| PRLH      | 2q37.3          | -0.01288 | 0.80189  | 0.855454 |
| SPACA5    | Xp11.23         | 0.012848 | 0.802353 | 0.855883 |
| MGARP     | 4q31.1          | 0.012844 | 0.80241  | 0.855883 |
| LINC00638 | 14q32.33        | -0.01284 | 0.80242  | 0.855883 |
| HOXB9     | 17q21.32        | -0.01283 | 0.80259  | 0.855972 |
| MAP3K7CL  | 21q21.3         | 0.012831 | 0.802619 | 0.855972 |
| FAM217B   | 20q13.33        | -0.01283 | 0.802645 | 0.855972 |
| RBM26     | 13q31.1         | 0.012827 | 0.802675 | 0.855972 |
| DDIT4     | 10q22.1         | 0.012823 | 0.80273  | 0.855985 |
| ZNF215    | 11p15.4         | -0.01282 | 0.802772 | 0.855985 |
| OR8H1     | 11q12.1         | -0.01278 | 0.803439 | 0.856651 |
| ASF1A     | 6q22.31         | 0.01274  | 0.803989 | 0.857191 |
| PSORS1C3  | 6p21.33         | 0.012733 | 0.804091 | 0.857255 |
| IQCF6     | 3p21.2          | 0.012726 | 0.804187 | 0.857312 |
| ZNF500    | 16p13.3         | 0.012719 | 0.804294 | 0.857379 |
| CEACAM20  | 19q13.31        | -0.01271 | 0.804431 | 0.85746  |
| SNORA16B  | 1q32.3          | -0.01271 | 0.8045   | 0.85746  |

|            |          |          |          |          |
|------------|----------|----------|----------|----------|
| NOS3       | 7q36.1   | 0.012704 | 0.804521 | 0.85746  |
| FZD7       | 2q33.1   | -0.0127  | 0.80454  | 0.85746  |
| RNF130     | 5q35.3   | 0.0127   | 0.804592 | 0.857469 |
| PVALEF     | 17q25.3  | -0.01269 | 0.804765 | 0.857608 |
| PJA1       | Xq13.1   | 0.01267  | 0.80504  | 0.857856 |
| MAPT-AS1   | 17q21.31 | 0.012665 | 0.805109 | 0.857884 |
| NLRP5      | 19q13.43 | 0.012661 | 0.805169 | 0.857901 |
| CYB561A3   | 11q12.2  | -0.01266 | 0.805254 | 0.857947 |
| FREM2      | 13q13.3  | -0.01265 | 0.805374 | 0.858029 |
| LINC00574  | 6q27     | -0.01259 | 0.806179 | 0.858803 |
| ZNF527     | 19q13.12 | -0.01259 | 0.806186 | 0.858803 |
| SPAM1      | 7q31.32  | 0.012585 | 0.806317 | 0.858896 |
| MAPK8IP1P2 | 17q21.31 | 0.01258  | 0.806404 | 0.858943 |
| PSD4       | 2q14.1   | -0.01255 | 0.806923 | 0.859409 |
| HSPA1A     | 6p21.33  | -0.01254 | 0.806969 | 0.859409 |
| UBTFL1     | 11q14.3  | -0.01254 | 0.806969 | 0.859409 |
| TSPAN10    | 17q25.3  | -0.01253 | 0.807207 | 0.859616 |
| WDR91      | 7q33     | 0.012507 | 0.807505 | 0.859848 |
| C11ORF96   | 11p11.2  | 0.012506 | 0.807511 | 0.859848 |
| ASZ1       | 7q31.2   | 0.012496 | 0.807662 | 0.859963 |
| SALL4      | 20q13.2  | 0.012487 | 0.8078   | 0.860065 |
| FBXL2      | 3p22.3   | -0.01248 | 0.807979 | 0.860209 |
| PDCD11     | 10q24.33 | -0.01245 | 0.80834  | 0.860548 |
| OCLNP1     | 5q13.2   | 0.01243  | 0.808667 | 0.86085  |
| WTAP       | 6q25.3   | 0.012418 | 0.808847 | 0.860996 |
| MCOLN2     | 1p22.3   | -0.01241 | 0.809029 | 0.861144 |
| ELAC2      | 17p12    | 0.012397 | 0.809156 | 0.861192 |
| FGF7P6     | 9q13     | -0.01239 | 0.809216 | 0.861192 |
| OR2T35     | 1q44     | -0.01239 | 0.809222 | 0.861192 |
| HAO1       | 20p12.3  | 0.012391 | 0.809246 | 0.861192 |
| RNF148     | 7q31.32  | 0.012367 | 0.809607 | 0.86153  |
| FAM221B    | 9p13.3   | 0.012321 | 0.810312 | 0.862234 |
| DAZ2       | Yq11.223 | 0.012279 | 0.810946 | 0.862864 |
| MINPP1     | 10q23.2  | 0.012269 | 0.811093 | 0.862961 |
| CDC7       | 1p22.1   | -0.01227 | 0.811124 | 0.862961 |
| PPFIBP2    | 11p15.4  | -0.01225 | 0.811428 | 0.863239 |
| FAM234A    | 16p13.3  | -0.01221 | 0.811975 | 0.863743 |
| TMSB4Y     | Yq11.221 | -0.01221 | 0.812005 | 0.863743 |
| OR51Q1     | 11p15.4  | 0.012207 | 0.812032 | 0.863743 |
| CHRNE      | 17p13.2  | -0.01219 | 0.81229  | 0.863973 |
| CBLIF      | 11q12.1  | 0.012175 | 0.812506 | 0.864156 |
| PBK        | 8p21.1   | -0.01215 | 0.812954 | 0.864567 |
| ZYG11A     | 1p32.3   | -0.01214 | 0.812979 | 0.864567 |
| FOLH1B     | 11q14.3  | 0.012138 | 0.813074 | 0.864623 |
| ZSCAN1     | 19q13.43 | 0.012082 | 0.813915 | 0.86547  |
| USHBP1     | 19p13.11 | 0.012069 | 0.814119 | 0.865642 |
| OR5K1      | 3q11.2   | 0.012057 | 0.81429  | 0.865777 |
| TMPRSS11B  | 4q13.2   | -0.01205 | 0.814375 | 0.865822 |
| CPS1-IT1   | 2q34     | 0.012044 | 0.814486 | 0.865894 |
| HNRNPC     | 14q11.2  | -0.01202 | 0.814884 | 0.866238 |
| DYRK1B     | 19q13.2  | 0.012015 | 0.814923 | 0.866238 |
| CTSL3P     | 9q21.33  | -0.01201 | 0.814982 | 0.866238 |
| HIST1H4F   | 6p22.2   | 0.012012 | 0.814983 | 0.866238 |
| DENND2A    | 7q34     | 0.012    | 0.815158 | 0.866357 |
| RGSL1      | 1q25.3   | 0.011998 | 0.815181 | 0.866357 |
| TMEM248    | 7q11.21  | -0.01196 | 0.815721 | 0.86686  |
| TTC7B      | 14q32.11 | 0.011961 | 0.815741 | 0.86686  |
| KRT34      | 17q21.2  | 0.011956 | 0.81582  | 0.866898 |



|           |                            |          |          |          |
|-----------|----------------------------|----------|----------|----------|
| ANKMY2    | 7p21.1                     | 0.011937 | 0.816106 | 0.867155 |
| IFNA4     | 9p21.3                     | -0.01193 | 0.816253 | 0.867243 |
| ZNF333    | 19p13.12                   | 0.011926 | 0.816275 | 0.867243 |
| IST1      | 16q22.2                    | -0.01192 | 0.816353 | 0.86728  |
| CEP126    | 11q22.1                    | 0.01191  | 0.816526 | 0.867418 |
| SERHL     | 22q13.2                    | -0.0119  | 0.816695 | 0.867552 |
| DMC1      | 22q13.1                    | 0.011879 | 0.816985 | 0.867814 |
| FASLG     | 1q24.3                     | 0.01187  | 0.817125 | 0.867916 |
| SPINK6    | 5q32                       | -0.01186 | 0.817327 | 0.868036 |
| REEP5     | 5q22.2                     | -0.01186 | 0.817344 | 0.868036 |
| NFAT5     | 16q22.1                    | 0.011853 | 0.817389 | 0.868036 |
| DMBX1     | 1p33                       | 0.011849 | 0.817448 | 0.868036 |
| CAGE1     | 6p24.3                     | -0.01185 | 0.817454 | 0.868036 |
| RFX8      | 2q11.2                     | -0.01184 | 0.817538 | 0.868078 |
| CSRP2     | 12q21.2                    | -0.01182 | 0.817907 | 0.868425 |
| POU1F1    | 3p11.2                     | 0.011813 | 0.81799  | 0.868456 |
| DIPK1C    | 18q22.3                    | 0.011811 | 0.818023 | 0.868456 |
| HAR1A     | 20q13.33                   | 0.0118   | 0.818192 | 0.868564 |
| C19ORF54  | 19q13.2                    | -0.01179 | 0.818269 | 0.868564 |
| PPP6C     | 9q33.3                     | -0.01179 | 0.818295 | 0.868564 |
| KLC4      | 6p21.1                     | -0.01179 | 0.818334 | 0.868564 |
| ZNF813    | 19q13.42                   | -0.01179 | 0.818342 | 0.868564 |
| KRTAP4-9  | 17q21.2                    | -0.01177 | 0.818577 | 0.868767 |
| PLCXD1    | Xp22.33 and Yp11.32-p11.31 | 0.011766 | 0.818703 | 0.868855 |
| DAPK2     | 15q22.31                   | 0.011753 | 0.818901 | 0.86902  |
| CBWD5     | 9q21.11                    | -0.01172 | 0.819448 | 0.869554 |
| KRT14     | 17q21.2                    | 0.011706 | 0.819603 | 0.869672 |
| GNAT2     | 1p13.3                     | -0.0117  | 0.819714 | 0.869744 |
| MXD4      | 4p16.3                     | -0.0117  | 0.819772 | 0.869759 |
| ABCF1     | 6p21.33                    | 0.011683 | 0.819958 | 0.86991  |
| BCL3      | 19q13.32                   | -0.01167 | 0.820209 | 0.870075 |
| OR2V2     | 5q35.3                     | 0.011664 | 0.820242 | 0.870075 |
| LINC01554 | 5q15                       | -0.01166 | 0.820243 | 0.870075 |
| CLN6      | 15q23                      | -0.01165 | 0.820418 | 0.870214 |
| SERP1     | 3q25.1                     | -0.01164 | 0.820643 | 0.870406 |
| YY2       | Xp22.12                    | 0.011622 | 0.820884 | 0.870576 |
| TMPRSS7   | 3q13.2                     | -0.01162 | 0.820929 | 0.870576 |
| BMS1P4    | 10q22.2                    | -0.01162 | 0.820933 | 0.870576 |
| MKX       | 10p12.1                    | 0.011607 | 0.821103 | 0.87071  |
| LARP7     | 4q25                       | -0.01159 | 0.82137  | 0.870947 |
| TUBB6     | 18p11.21                   | -0.01154 | 0.822094 | 0.871669 |
| AMD1      | 6q21                       | 0.011518 | 0.822457 | 0.872007 |
| TRIM63    | 1p36.11                    | -0.01151 | 0.822541 | 0.87205  |
| FAM163B   | 9q34.2                     | -0.0115  | 0.822737 | 0.872212 |
| GOLGA2P6  | 10p11.23                   | -0.0115  | 0.822793 | 0.872225 |
| LINC01257 | 12q24.33                   | 0.011472 | 0.823148 | 0.872556 |
| GK2       | 4q21.21                    | 0.011462 | 0.823309 | 0.87268  |
| GCKR      | 2p23.3                     | 0.011439 | 0.823657 | 0.873003 |
| C10ORF95  | 10q24.32                   | 0.011423 | 0.823893 | 0.873163 |
| PCNX3     | 11q13.1                    | -0.01142 | 0.823896 | 0.873163 |
| PAIP2B    | 2p13.3                     | 0.011401 | 0.824232 | 0.873448 |
| FANCD2    | 3p25.3                     | -0.0114  | 0.824252 | 0.873448 |
| PKHD1     | 6p12.3-p12.2               | 0.011395 | 0.824316 | 0.87347  |
| JUN       | 1p32.1                     | 0.01139  | 0.824395 | 0.873508 |
| RNF126P1  | 17q22                      | 0.011382 | 0.824519 | 0.873593 |
| IRF8      | 16q24.1                    | -0.01137 | 0.824764 | 0.873802 |
| TCTEX1D4  | 1p34.1                     | -0.01136 | 0.824804 | 0.873802 |
| ITIH2     | 10p14                      | -0.01136 | 0.824915 | 0.873863 |

|           |          |          |          |          |
|-----------|----------|----------|----------|----------|
| MYL4      | 17q21.32 | -0.01135 | 0.824949 | 0.873863 |
| SEC22C    | 3p22.1   | -0.01135 | 0.825058 | 0.873865 |
| PAK5      | 20p12.2  | 0.011345 | 0.825079 | 0.873865 |
| ZNF708    | 19p12    | 0.011344 | 0.825094 | 0.873865 |
| TNFSF9    | 19p13.3  | -0.01134 | 0.825127 | 0.873865 |
| VANGL2    | 1q23.2   | -0.01134 | 0.825169 | 0.873865 |
| IBSP      | 4q22.1   | 0.011335 | 0.825226 | 0.873879 |
| C10ORF71  | 10q11.23 | -0.01133 | 0.825292 | 0.873899 |
| TMPRSS12  | 12q13.12 | -0.01133 | 0.825332 | 0.873899 |
| RPL23AP64 | 11q23.3  | 0.011325 | 0.825382 | 0.873906 |
| AQP6      | 12q13.12 | -0.01131 | 0.82555  | 0.874038 |
| LOC729609 | Xp22.12  | -0.01129 | 0.825959 | 0.874424 |
| TMCO4     | 1p36.13  | -0.01128 | 0.826014 | 0.874436 |
| LINC00461 | 5q14.3   | 0.011264 | 0.82631  | 0.874703 |
| LY6G6C    | 6p21.33  | 0.011241 | 0.826654 | 0.875021 |
| TMEM132D  | 12q24.33 | 0.011222 | 0.826947 | 0.875261 |
| FBXW5     | 9q34.3   | -0.01122 | 0.826986 | 0.875261 |
| KHDC1     | 6q13     | 0.011218 | 0.827012 | 0.875261 |
| SGSM2     | 17p13.3  | 0.011211 | 0.827116 | 0.875325 |
| IFNA10    | 9p21.3   | 0.011158 | 0.827919 | 0.876102 |
| CPLX3     | 15q24.1  | 0.011157 | 0.827938 | 0.876102 |
| SPTLC1    | 9q22.31  | 0.011143 | 0.828139 | 0.876269 |
| SPATA22   | 17p13.2  | 0.011137 | 0.828234 | 0.876323 |
| ECSCR     | 5q31.2   | 0.011133 | 0.828299 | 0.876346 |
| OR1G1     | 17p13.3  | 0.011122 | 0.828467 | 0.876477 |
| ATP6V0A2  | 12q24.31 | 0.011118 | 0.828522 | 0.876488 |
| TRAF3IP1  | 2q37.3   | 0.011105 | 0.828721 | 0.876653 |
| OR7D2     | 19p13.2  | -0.01109 | 0.828918 | 0.876771 |
| KRT17     | 17q21.2  | 0.011092 | 0.82892  | 0.876771 |
| AMER2     | 13q12.13 | 0.011077 | 0.829143 | 0.876923 |
| ZP4       | 1q43     | 0.011077 | 0.829152 | 0.876923 |
| SLC2A2    | 3q26.2   | 0.011029 | 0.829873 | 0.877639 |
| PCBP3     | 21q22.3  | 0.011025 | 0.829937 | 0.877662 |
| IAPP      | 12p12.1  | -0.01101 | 0.830189 | 0.877881 |
| ADGRG1    | 16q21    | -0.011   | 0.830284 | 0.877935 |
| RAX2      | 19p13.3  | 0.010986 | 0.830524 | 0.878118 |
| CAPRN2    | 12p11.21 | -0.01098 | 0.830562 | 0.878118 |
| ZNF556    | 19p13.3  | 0.010982 | 0.830588 | 0.878118 |
| CST9L     | 20p11.21 | -0.01094 | 0.83116  | 0.878676 |
| ZNF85     | 19p12    | -0.01092 | 0.831461 | 0.878948 |
| TOR1A     | 9q34.11  | 0.010913 | 0.831641 | 0.879065 |
| ZNF629    | 16p11.2  | -0.01091 | 0.831671 | 0.879065 |
| DCP1B     | 12p13.33 | 0.010909 | 0.831704 | 0.879065 |
| RAB28     | 4p15.33  | -0.01091 | 0.831753 | 0.879071 |
| C4ORF33   | 4q28.2   | 0.010901 | 0.831821 | 0.879097 |
| ZNF285    | 19q13.31 | -0.01089 | 0.831921 | 0.879156 |
| DMRTC2    | 19q13.2  | -0.01088 | 0.832137 | 0.879338 |
| DPPA2     | 3q13.13  | 0.010852 | 0.832561 | 0.879739 |
| C9ORF131  | 9p13.3   | -0.01084 | 0.832718 | 0.879859 |
| RTCB      | 22q12.3  | -0.01084 | 0.832816 | 0.879881 |
| PRAMEF14  | 1p36.21  | 0.010831 | 0.832882 | 0.879881 |
| RPS4Y2    | Yq11.223 | 0.01083  | 0.832899 | 0.879881 |
| STX1B     | 16p11.2  | 0.010829 | 0.832914 | 0.879881 |
| PFN2      | 3q25.1   | 0.010825 | 0.832973 | 0.879896 |
| HIST1H2AC | 6p22.2   | -0.01081 | 0.833229 | 0.88012  |
| USP32P1   | 17p11.2  | 0.010787 | 0.833559 | 0.880422 |
| C14ORF178 | 14q24.3  | -0.01077 | 0.833861 | 0.880694 |
| CD72      | 9p13.3   | 0.010739 | 0.834281 | 0.881092 |

|              |              |          |          |          |
|--------------|--------------|----------|----------|----------|
| KLK1         | 19q13.33     | 0.010729 | 0.834443 | 0.881172 |
| TSPY2        | Yp11.2       | -0.01073 | 0.834445 | 0.881172 |
| TTLL12       | 22q13.2      | -0.01071 | 0.834695 | 0.88139  |
| OR5P3        | 11p15.4      | 0.010695 | 0.834958 | 0.881621 |
| LOC100130331 | 1q43         | 0.010677 | 0.835229 | 0.88186  |
| SNAPC1       | 14q23.2      | 0.010655 | 0.835566 | 0.882141 |
| ZSCAN5A      | 19q13.43     | -0.01065 | 0.835583 | 0.882141 |
| MISP         | 19p13.3      | 0.010628 | 0.835976 | 0.882509 |
| MAP2K3       | 17p11.2      | 0.010625 | 0.836025 | 0.882515 |
| TTF1         | 9q34.13      | -0.01058 | 0.836703 | 0.883184 |
| ALG1L2       | 3q22.1       | -0.01057 | 0.83686  | 0.883303 |
| THNSL2       | 2p11.2       | 0.010558 | 0.837034 | 0.88344  |
| SLC5A9       | 1p33         | -0.01055 | 0.837109 | 0.883473 |
| CDC42EP5     | 19q13.42     | 0.010518 | 0.837653 | 0.884    |
| PDK1         | 2q31.1       | -0.0105  | 0.837905 | 0.88422  |
| FBH1         | 10p15.1      | 0.010473 | 0.838325 | 0.884616 |
| KCNK18       | 10q25.3      | 0.010453 | 0.838634 | 0.884895 |
| TCHP         | 12q24.11     | 0.01044  | 0.838836 | 0.885062 |
| TOMM40L      | 1q23.3       | 0.010413 | 0.839249 | 0.885452 |
| HILS1        | 17q21.33     | -0.01037 | 0.839914 | 0.886106 |
| CENPBD1P1    | 19q13.43     | -0.01036 | 0.84001  | 0.886161 |
| NME8         | 7p14.1       | 0.010318 | 0.840687 | 0.886787 |
| RSL24D1      | 15q21.3      | 0.010317 | 0.840708 | 0.886787 |
| CNGA4        | 11p15.4      | 0.010315 | 0.840743 | 0.886787 |
| GRAPL        | 17p11.2      | 0.010312 | 0.84078  | 0.886787 |
| OR9G9        | 11q11        | 0.010301 | 0.840953 | 0.886922 |
| CRLF1        | 19p13.11     | 0.01027  | 0.84143  | 0.887378 |
| ATG3         | 3q13.2       | 0.01025  | 0.841732 | 0.88765  |
| ITCH         | 20q11.22     | -0.01024 | 0.841807 | 0.887683 |
| ZNF280B      | 22q11.22     | 0.01024  | 0.841876 | 0.887688 |
| MTRF1L       | 6q25.2       | 0.010236 | 0.841942 | 0.887688 |
| VAMP3        | 1p36.23      | -0.01024 | 0.841945 | 0.887688 |
| OSR2         | 8q22.2       | -0.01022 | 0.842217 | 0.887928 |
| NISCH        | 3p21.1       | -0.01019 | 0.842686 | 0.888376 |
| ERICH6       | 3q25.1       | 0.010174 | 0.842882 | 0.888535 |
| HES5         | 1p36.32      | 0.010144 | 0.843343 | 0.888865 |
| ATP7B        | 13q14.3      | 0.010144 | 0.843346 | 0.888865 |
| ACOXL        | 2q13         | -0.01014 | 0.843362 | 0.888865 |
| BDH1         | 3q29         | 0.010142 | 0.843372 | 0.888865 |
| C16ORF71     | 16p13.3      | 0.010121 | 0.843692 | 0.889155 |
| MYH15        | 3q13.13      | 0.010111 | 0.84385  | 0.889275 |
| MEAK7        | 16q24.1      | -0.0101  | 0.843946 | 0.88933  |
| ZNF451       | 6p12.1       | -0.01009 | 0.844239 | 0.889591 |
| XPO1         | 2p15         | 0.010071 | 0.844462 | 0.889779 |
| CPNE3        | 8q21.3       | 0.010063 | 0.844586 | 0.889864 |
| LRRC59       | 17q21.33     | 0.010055 | 0.844698 | 0.889935 |
| DEDD         | 1q23.3       | 0.010047 | 0.844816 | 0.890004 |
| C1GALT1      | 7p22.1-p21.3 | -0.01005 | 0.844852 | 0.890004 |
| CSHL1        | 17q23.3      | 0.010023 | 0.845185 | 0.890307 |
| KIR2DS4      | 19q13.42     | -0.01001 | 0.845332 | 0.890415 |
| PINK1        | 1p36.12      | 0.010008 | 0.84542  | 0.890453 |
| JRKL         | 11q21        | -0.01001 | 0.845456 | 0.890453 |
| OR10AG1      | 11q12.1      | -0.00999 | 0.845714 | 0.890677 |
| TRHDE        | 12q21.1      | -0.00996 | 0.846077 | 0.891013 |
| FLJ12825     | 12q13.13     | -0.00995 | 0.846257 | 0.891155 |
| CHAD         | 17q21.33     | 0.009941 | 0.846442 | 0.891303 |
| CCT8L2       | 22q11.1      | 0.009922 | 0.846736 | 0.891566 |
| MFSD14B      | 9q22.32      | -0.00991 | 0.846859 | 0.891648 |

|              |                 |          |          |          |
|--------------|-----------------|----------|----------|----------|
| FHOD3        | 18q12.2         | 0.009897 | 0.847115 | 0.891871 |
| PPP2R5B      | 11q13.1         | -0.00986 | 0.847604 | 0.892287 |
| IFITM4P      | 6p22.1          | 0.009863 | 0.847636 | 0.892287 |
| LINC00923    | 15q26.2         | 0.009861 | 0.847665 | 0.892287 |
| LOC100271832 | 2p22.3          | -0.00986 | 0.847688 | 0.892287 |
| OR3A3        | 17p13.2         | 0.009817 | 0.848327 | 0.892913 |
| LINC00889    | Xq26.3          | -0.0098  | 0.848606 | 0.893159 |
| GRASP        | 12q13.13        | 0.009792 | 0.848718 | 0.89323  |
| KCNQ1DN      | 11p15.4 11p15.5 | 0.009783 | 0.848846 | 0.893318 |
| VAT1         | 17q21.31        | 0.009774 | 0.848991 | 0.893383 |
| PLPP5        | 8p11.23         | 0.009773 | 0.848998 | 0.893383 |
| KRTAP10-2    | 21q22.3         | -0.00976 | 0.849156 | 0.893503 |
| NNAT         | 20q11.23        | 0.009736 | 0.849571 | 0.893893 |
| FLJ42393     | 3q27.3          | 0.009733 | 0.849617 | 0.893894 |
| LINC00032    | 9p21.2          | 0.009718 | 0.849846 | 0.894065 |
| CHAC2        | 2p16.2          | 0.009716 | 0.849868 | 0.894065 |
| RBBP9        | 20p11.23        | 0.009712 | 0.849937 | 0.894091 |
| HTR3B        | 11q23.2         | -0.0097  | 0.850159 | 0.894258 |
| APOC1        | 19q13.32        | 0.009695 | 0.850191 | 0.894258 |
| UGT1A4       | 2q37.1          | 0.009692 | 0.850233 | 0.894258 |
| ZSCAN5B      | 19q13.43        | 0.00969  | 0.850275 | 0.894258 |
| DNAJC17      | 15q15.1         | 0.00968  | 0.850421 | 0.894364 |
| TMPRSS11E    | 4q13.2          | 0.009671 | 0.850562 | 0.894466 |
| IK           | 5q31.3          | 0.009661 | 0.850713 | 0.894578 |
| SPDYE7P      | 7q11.23         | 0.009651 | 0.850861 | 0.894686 |
| HCCAT5       | 16q22.3         | 0.009639 | 0.85105  | 0.894804 |
| LYPD2        | 8q24.3          | 0.009638 | 0.85107  | 0.894804 |
| C10ORF120    | 10q26.13        | 0.009634 | 0.85112  | 0.894804 |
| ZNF470       | 19q13.43        | 0.009632 | 0.851157 | 0.894804 |
| ZNF18        | 17p12           | -0.00963 | 0.851197 | 0.894804 |
| PCK1         | 20q13.31        | 0.00961  | 0.851486 | 0.895061 |
| GPR17        | 2q14.3          | 0.009602 | 0.85162  | 0.895155 |
| FAM167B      | 1p35.2          | -0.00959 | 0.851761 | 0.895256 |
| SLC52A1      | 17p13.2         | 0.009589 | 0.851817 | 0.895269 |
| VWC2L        | 2q34-q35        | 0.009577 | 0.852004 | 0.895358 |
| SPDYE1       | 7p13            | -0.00957 | 0.852032 | 0.895358 |
| RTL4         | Xq23            | -0.00957 | 0.852036 | 0.895358 |
| LINC01312    | 6q23.2          | -0.00956 | 0.852232 | 0.895471 |
| REC114       | 15q24.1         | 0.009561 | 0.852234 | 0.895471 |
| BEST1        | 11q12.3         | -0.00956 | 0.85231  | 0.895473 |
| DMWD         | 19q13.32        | 0.009556 | 0.852325 | 0.895473 |
| LRRC52       | 1q24.1          | -0.00955 | 0.852376 | 0.89548  |
| IL20RA       | 6q23.3          | 0.009548 | 0.852433 | 0.895493 |
| FEM1A        | 19p13.3         | 0.009512 | 0.852992 | 0.896033 |
| CCDC173      | 2q31.1          | 0.009485 | 0.853403 | 0.896418 |
| SLC29A3      | 10q22.1         | -0.00948 | 0.853449 | 0.89642  |
| C5ORF49      | 5p15.31         | -0.00947 | 0.85356  | 0.896489 |
| KLRC3        | 12p13.2         | -0.00947 | 0.853613 | 0.896497 |
| GPR150       | 5q15            | -0.00946 | 0.853765 | 0.896608 |
| SPTBN4       | 19q13.2         | 0.009458 | 0.853808 | 0.896608 |
| E2F2         | 1p36.12         | -0.00945 | 0.853884 | 0.896641 |
| ARR3         | Xq13.1          | -0.00945 | 0.853973 | 0.896652 |
| KRTAP5-11    | 11q13.4         | 0.009447 | 0.853984 | 0.896652 |
| MTO1         | 6q13            | 0.009442 | 0.854055 | 0.896679 |
| RAP1GDS1     | 4q23            | 0.009423 | 0.854354 | 0.896947 |
| PSMG3-AS1    | 7p22.3          | 0.009411 | 0.854529 | 0.897083 |
| PMS1         | 2q32.2          | -0.00941 | 0.854617 | 0.897129 |
| FLJ16779     | 20q13.33        | 0.009385 | 0.854926 | 0.897366 |

|          |                  |          |          |          |
|----------|------------------|----------|----------|----------|
| GPHA2    | 11q13.1          | -0.00938 | 0.854933 | 0.897366 |
| CYB5R3   | 22q13.2          | 0.009371 | 0.855141 | 0.897537 |
| P2RY11   | 19p13.2          | 0.00936  | 0.855307 | 0.897636 |
| TXLNGY   | Yq11.222-q11.223 | 0.009359 | 0.855325 | 0.897636 |
| TEX33    | 22q12.3          | 0.009355 | 0.855397 | 0.897646 |
| CXCL6    | 4q13.3           | -0.00935 | 0.855424 | 0.897646 |
| VIPR1    | 3p22.1           | 0.009347 | 0.855506 | 0.897685 |
| ALOX15   | 17p13.2          | 0.009338 | 0.855653 | 0.897793 |
| LIPC     | 15q21.3          | 0.00933  | 0.855766 | 0.897804 |
| SLC25A42 | 19p13.11         | 0.009329 | 0.855779 | 0.897804 |
| DDX50    | 10q22.1          | -0.00933 | 0.855799 | 0.897804 |
| NBL1     | 1p36.13          | -0.00932 | 0.855937 | 0.897902 |
| SRRM3    | 7q11.23          | -0.0093  | 0.856233 | 0.898166 |
| RGS10    | 10q26.11         | -0.00928 | 0.856467 | 0.898333 |
| TCP10L   | 21q22.11         | -0.00928 | 0.856526 | 0.898333 |
| LCN15    | 9q34.3           | 0.009278 | 0.856569 | 0.898333 |
| C3ORF20  | 3p25.1           | 0.009278 | 0.856572 | 0.898333 |
| FOXR1    | 11q23.3          | 0.009267 | 0.856742 | 0.898448 |
| HTN3     | 4q13.3           | 0.009263 | 0.8568   | 0.898448 |
| CCKBR    | 11p15.4          | 0.009259 | 0.856859 | 0.898448 |
| TCHHL1   | 1q21.3           | 0.009259 | 0.856861 | 0.898448 |
| MORN5    | 9q33.2           | -0.00925 | 0.856966 | 0.898511 |
| CLRN3    | 10q26.2          | 0.009241 | 0.857139 | 0.898645 |
| CCL3L3   | 17q12            | -0.00924 | 0.857187 | 0.898649 |
| ZNF879   | 5q35.3           | 0.00921  | 0.857613 | 0.899048 |
| OR56A3   | 11p15.4          | -0.0092  | 0.857745 | 0.899134 |
| CXORF58  | Xp22.11          | 0.009198 | 0.857785 | 0.899134 |
| REEP2    | 5q31.2           | -0.00917 | 0.858216 | 0.899539 |
| GPR26    | 10q26.13         | 0.009149 | 0.858542 | 0.899803 |
| INS-IGF2 | 11p15.5          | -0.00915 | 0.858557 | 0.899803 |
| USP31    | 16p12.2          | -0.00913 | 0.858871 | 0.900084 |
| OR4F29   | 1p36.33          | -0.00912 | 0.859045 | 0.900219 |
| ZFP42    | 4q35.2           | -0.00911 | 0.85913  | 0.900249 |
| VXN      | 8q13.1           | 0.009108 | 0.859163 | 0.900249 |
| CARD16   | 11q22.3          | 0.009072 | 0.859711 | 0.900776 |
| TCERG1L  | 10q26.3          | 0.009066 | 0.859807 | 0.900829 |
| ADAD1    | 4q27             | -0.00906 | 0.859912 | 0.900879 |
| RABGEF1  | 7q11.21          | -0.00905 | 0.859985 | 0.900879 |
| LYG2     | 2q11.2           | 0.009052 | 0.860018 | 0.900879 |
| OIP5     | 15q15.1          | -0.00905 | 0.860034 | 0.900879 |
| PLK4     | 4q28.1           | -0.00905 | 0.860116 | 0.900918 |
| ASB17    | 1p31.1           | 0.009029 | 0.860376 | 0.901142 |
| TAS2R10  | 12p13.2          | 0.009023 | 0.860469 | 0.901193 |
| PPP4R3C  | Xp21.3           | -0.00902 | 0.860531 | 0.901211 |
| OR13C8   | 9q31.1           | -0.009   | 0.86075  | 0.901342 |
| CDY2B    | Yq11.222         | -0.009   | 0.860789 | 0.901342 |
| C19ORF71 | 19p13.3          | -0.009   | 0.860792 | 0.901342 |
| FAM136BP | 6p25.2           | -0.009   | 0.860882 | 0.90139  |
| DSC1     | 18q12.1          | 0.008992 | 0.860944 | 0.901407 |
| RGS16    | 1q25.3           | 0.008988 | 0.860996 | 0.901415 |
| PAX1     | 20p11.22         | -0.00893 | 0.861862 | 0.902275 |
| C8ORF31  | 8q24.3           | -0.00893 | 0.861937 | 0.902294 |
| TTY9B    | Yq11.222         | -0.00892 | 0.861971 | 0.902294 |
| EPM2AIP1 | 3p22.2           | 0.008893 | 0.862459 | 0.902758 |
| UPK3A    | 22q13.31         | 0.008887 | 0.862553 | 0.902764 |
| SVIP     | 11p14.3          | 0.008887 | 0.862555 | 0.902764 |
| VWC2     | 7p12.2           | -0.00888 | 0.862615 | 0.90278  |
| SLC46A1  | 17q11.2          | -0.00886 | 0.862964 | 0.903068 |

|            |                    |          |          |          |
|------------|--------------------|----------|----------|----------|
| ZNF320     | 19q13.41           | -0.00886 | 0.863007 | 0.903068 |
| GABRA3     | Xq28               | -0.00886 | 0.863035 | 0.903068 |
| ERCC8      | 5q12.1             | 0.008851 | 0.863109 | 0.903068 |
| GAGE2A     | Xp11.23            | -0.00885 | 0.863116 | 0.903068 |
| KIAA1586   | 6p12.1             | 0.008842 | 0.863238 | 0.903146 |
| ZBED1      | Xp22.33 and Yp11.2 | -0.00884 | 0.86328  | 0.903146 |
| C9ORF85    | 9q21.13            | 0.008832 | 0.863389 | 0.903212 |
| SPATA21    | 1p36.13            | 0.008823 | 0.863526 | 0.903309 |
| CNN2       | 19p13.3            | -0.00881 | 0.863778 | 0.903525 |
| PIGC       | 1q24.3             | 0.008787 | 0.864085 | 0.903798 |
| EIF2A      | 3q25.1             | -0.00877 | 0.864286 | 0.903932 |
| TRIM50     | 7q11.23            | 0.008773 | 0.864303 | 0.903932 |
| LINC00111  | 21q22.3            | -0.00876 | 0.864495 | 0.904085 |
| OR2A1      | 7q35               | -0.00875 | 0.864659 | 0.904134 |
| SLC43A2    | 17p13.3            | -0.00875 | 0.864662 | 0.904134 |
| PP2D1      | 3p24.3             | 0.008748 | 0.864677 | 0.904134 |
| SLC35B4    | 7q33               | 0.008742 | 0.864774 | 0.904189 |
| OCEL1      | 19p13.11           | 0.00873  | 0.864959 | 0.904275 |
| FXVD1      | 19q13.12           | -0.00873 | 0.864988 | 0.904275 |
| OR1B1      | 9q33.2             | -0.00873 | 0.864992 | 0.904275 |
| HUNK       | 21q22.11           | 0.008725 | 0.865038 | 0.904276 |
| TRIM48     | 11q11              | -0.00867 | 0.865824 | 0.90505  |
| OTULIN     | 5p15.2             | 0.008663 | 0.865975 | 0.905161 |
| UBL4B      | 1p13.3             | -0.00866 | 0.866046 | 0.90518  |
| C22ORF15   | 22q11.23           | -0.00866 | 0.866083 | 0.90518  |
| GSC        | 14q32.13           | -0.00865 | 0.866216 | 0.905271 |
| TUBGCP2    | 10q26.3            | 0.008633 | 0.86644  | 0.905405 |
| SHISA4     | 1q32.1             | -0.00863 | 0.866442 | 0.905405 |
| LYRM7      | 5q23.3-q31.1       | 0.00863  | 0.86648  | 0.905405 |
| BTBD18     | 11q12.1            | -0.00863 | 0.866526 | 0.905406 |
| PWRN1      | 15q11.2            | -0.00862 | 0.866692 | 0.905532 |
| FSTL4      | 5q31.1             | -0.0086  | 0.866957 | 0.905762 |
| ACSL5      | 10q25.2            | -0.00859 | 0.867077 | 0.90584  |
| SLC6A18    | 5p15.33            | 0.00858  | 0.867256 | 0.90598  |
| MTSS2      | 16q22.1            | -0.00858 | 0.867318 | 0.905997 |
| POM121L9P  | 22q11.23           | 0.00854  | 0.867864 | 0.90652  |
| XCL1       | 1q24.2             | -0.00854 | 0.867933 | 0.906527 |
| EIF4H      | 7q11.23            | 0.008534 | 0.867961 | 0.906527 |
| EGOT       | 3p26.1             | -0.00851 | 0.868289 | 0.906822 |
| PRKX       | Xp22.33            | 0.008463 | 0.869047 | 0.907567 |
| CLCNKA     | 1p36.13            | -0.00845 | 0.869297 | 0.907778 |
| LRRC74B    | 22q11.21           | 0.008436 | 0.869454 | 0.907778 |
| SLC25A51P4 | 11p15.1            | -0.00844 | 0.869466 | 0.907778 |
| TRIML2     | 4q35.2             | 0.008436 | 0.869466 | 0.907778 |
| ZDHHC13    | 11p15.1            | -0.00844 | 0.869476 | 0.907778 |
| IRX4       | 5p15.33            | 0.008407 | 0.869909 | 0.908174 |
| CIRBP      | 19p13.3            | 0.008404 | 0.869948 | 0.908174 |
| IQSEC2     | Xp11.22            | -0.0084  | 0.869991 | 0.908174 |
| HBG1       | 11p15.4            | 0.008374 | 0.870418 | 0.908572 |
| AGA        | 4q34.3             | -0.00836 | 0.870622 | 0.908738 |
| COX15      | 10q24.2            | -0.00834 | 0.870863 | 0.908936 |
| LYSMD1     | 1q21.3             | -0.00834 | 0.870903 | 0.908936 |
| DNAI2      | 17q25.1            | -0.00834 | 0.870973 | 0.908938 |
| FNDC4      | 2p23.3             | 0.008336 | 0.870995 | 0.908938 |
| NANOS2     | 19q13.32           | -0.00831 | 0.871376 | 0.909282 |
| NR2E3      | 15q23              | -0.00831 | 0.871416 | 0.909282 |
| GJD2       | 15q14              | -0.00829 | 0.871748 | 0.909546 |
| HMX2       | 10q26.13           | -0.00828 | 0.871784 | 0.909546 |

|                    |                |          |          |          |
|--------------------|----------------|----------|----------|----------|
| HMX1               | 4p16.1         | -0.00828 | 0.871805 | 0.909546 |
| PRB2               | 12p13.2        | 0.008278 | 0.87189  | 0.909587 |
| LINC00623          | 1p11.2         | -0.00827 | 0.872049 | 0.909705 |
| DEF6               | 6p21.31        | 0.008259 | 0.872178 | 0.909792 |
| PTGIR              | 19q13.32       | 0.008251 | 0.8723   | 0.909872 |
| ZNF733P            | 7q11.21        | -0.00824 | 0.8724   | 0.909929 |
| MVB12B             | 9q33.3         | -0.00823 | 0.872554 | 0.91004  |
| ARMC3              | 10p12.2        | -0.00823 | 0.872597 | 0.91004  |
| SFPQ               | 1p34.3         | -0.00823 | 0.872683 | 0.910083 |
| SPP2               | 2q37.1         | -0.00821 | 0.872986 | 0.910351 |
| TRPV5              | 7q34           | -0.00819 | 0.873264 | 0.910573 |
| TYW1               | 7q11.21        | -0.00818 | 0.873331 | 0.910573 |
| FAXC               | 6q16.2         | 0.008183 | 0.873336 | 0.910573 |
| CENPE              | 4q24           | 0.008173 | 0.873496 | 0.910693 |
| ZNF705D            | 8p23.1         | 0.008162 | 0.873669 | 0.910791 |
| GTF2IRD2           | 7q11.23        | -0.00816 | 0.873681 | 0.910791 |
| MCM9               | 6q22.31        | 0.008153 | 0.873806 | 0.910875 |
| OAZ3               | 1q21.3         | 0.008124 | 0.874243 | 0.911282 |
| OR6B1              | 7q35           | -0.00812 | 0.874319 | 0.911314 |
| PAX7               | 1p36.13        | 0.008103 | 0.874578 | 0.911536 |
| CCDC155            | 19q13.33       | 0.008094 | 0.874709 | 0.911626 |
| KRTAP19-5          | 21q22.11       | 0.00809  | 0.874769 | 0.911641 |
| CASP4              | 11q22.3        | -0.00808 | 0.87491  | 0.91174  |
| HNRNPA3P1          | 10q11.21       | 0.008057 | 0.875279 | 0.912077 |
| C6ORF120           | 6q27           | -0.00805 | 0.875373 | 0.912128 |
| MAP3K14            | 17q21.31       | -0.00803 | 0.875627 | 0.912322 |
| KRIT1              | 7q21.2         | 0.008033 | 0.875651 | 0.912322 |
| SSX2               | Xp11.22        | -0.00802 | 0.875771 | 0.912401 |
| TEX13B             | Xq22.3         | 0.008012 | 0.875972 | 0.912562 |
| SNORA47            | 5q13.3         | -0.00798 | 0.876401 | 0.912938 |
| MRPL19             | 2p12           | 0.007982 | 0.876424 | 0.912938 |
| TRPM3              | 9q21.12-q21.13 | -0.00792 | 0.877306 | 0.913769 |
| CDNF               | 10p13          | 0.007924 | 0.877314 | 0.913769 |
| SPAG7              | 17p13.2        | 0.007912 | 0.877499 | 0.913915 |
| PSMB11             | 14q11.2        | 0.007897 | 0.877737 | 0.914116 |
| KIAA0930           | 22q13.31       | -0.00788 | 0.878068 | 0.914412 |
| DGKK               | Xp11.22        | -0.00784 | 0.878678 | 0.915    |
| P4HB               | 17q25.3        | -0.00782 | 0.878944 | 0.91523  |
| LRRFIP2            | 3p22.2         | 0.007787 | 0.879424 | 0.915681 |
| DLGAP1             | 18p11.31       | -0.00777 | 0.879745 | 0.915968 |
| ASTL               | 2q11.2         | -0.00776 | 0.879807 | 0.915985 |
| NUS1               | 6q22.1         | 0.007757 | 0.879883 | 0.916017 |
| COL6A4P1           | 3p25.1         | -0.00775 | 0.880006 | 0.916098 |
| SLC26A3            | 7q22.3-q31.1   | 0.007707 | 0.880651 | 0.916721 |
| TRDMT1             | 10p13          | -0.0077  | 0.88077  | 0.916797 |
| PNPLA7             | 9q34.3         | 0.007684 | 0.881012 | 0.916967 |
| TMEM253            | 14q11.2        | 0.007683 | 0.881025 | 0.916967 |
| WDR38              | 9q33.3         | -0.00767 | 0.881168 | 0.917057 |
| ZNF732             | 4p16.3         | 0.007671 | 0.881203 | 0.917057 |
| FAM102A            | 9q34.11        | 0.007603 | 0.882249 | 0.918099 |
| ADAD2              | 16q24.1        | -0.0076  | 0.882361 | 0.918167 |
| SFTPC              | 8p21.3         | -0.00759 | 0.882446 | 0.918208 |
| PTGER4P2-CDK2AP2P2 | 9q13           | 0.007587 | 0.882505 | 0.918221 |
| GPR78              | 4p16.1         | 0.00757  | 0.882763 | 0.918442 |
| TBC1D32            | 6q22.31        | 0.007559 | 0.882935 | 0.918573 |
| PIGG               | 4p16.3         | -0.00755 | 0.88314  | 0.918739 |
| C10ORF99           | 10q23.1        | 0.007535 | 0.883299 | 0.918856 |
| VTN                | 17q11.2        | 0.007522 | 0.883494 | 0.919012 |

|            |               |          |          |          |
|------------|---------------|----------|----------|----------|
| NKTR       | 3p22.1        | -0.00751 | 0.883626 | 0.919102 |
| PRDM16     | 1p36.32       | 0.00751  | 0.883679 | 0.919109 |
| NCALD      | 8q22.3        | 0.007487 | 0.88404  | 0.919394 |
| OR5B2      | 11q12.1       | 0.007486 | 0.884045 | 0.919394 |
| ACTG1      | 17q25.3       | -0.00747 | 0.884269 | 0.919579 |
| MCEE       | 2p13.3        | 0.007467 | 0.884342 | 0.919607 |
| IL18RAP    | 2q12.1        | 0.007447 | 0.884651 | 0.919869 |
| BLVRA      | 7p13          | 0.007445 | 0.884686 | 0.919869 |
| OR6C1      | 12q13.2       | 0.007437 | 0.884813 | 0.919953 |
| CCNJ       | 10q24.1       | -0.00743 | 0.884911 | 0.920008 |
| MAPRE3     | 2p23.3        | 0.007416 | 0.885123 | 0.920181 |
| HBA2       | 16p13.3       | 0.007405 | 0.885299 | 0.920315 |
| RANBP10    | 16q22.1       | -0.0074  | 0.885401 | 0.920374 |
| CRABP1     | 15q25.1       | -0.00739 | 0.885586 | 0.920518 |
| ADAM3A     | 8p11.22       | 0.007367 | 0.885885 | 0.920781 |
| PSG9       | 19q13.31      | -0.00736 | 0.885938 | 0.920789 |
| RHNO1      | 12p13.33      | 0.007358 | 0.886017 | 0.920823 |
| HSD11B2    | 16q22.1       | 0.007349 | 0.886156 | 0.92092  |
| ACP4       | 19q13.33      | -0.00733 | 0.886385 | 0.92111  |
| SIAH2      | 3q25.1        | 0.007331 | 0.886435 | 0.921114 |
| BRCA1      | 17q21.31      | -0.00732 | 0.886531 | 0.921166 |
| SLC7A13    | 8q21.3        | 0.00732  | 0.886611 | 0.921201 |
| TTY2       | Yp11.2        | -0.00731 | 0.886779 | 0.921328 |
| DERL2      | 17p13.2       | -0.0073  | 0.886855 | 0.92136  |
| SIN3B      | 19p13.11      | -0.00729 | 0.887077 | 0.921542 |
| OR5P2      | 11p15.4       | -0.00728 | 0.887224 | 0.9216   |
| ICAM4      | 19p13.2       | -0.00728 | 0.887225 | 0.9216   |
| RPS15AP10  | 1p34.1        | -0.00728 | 0.887283 | 0.921613 |
| MYBBP1A    | 17p13.2       | -0.00727 | 0.887375 | 0.921643 |
| KLK15      | 19q13.33      | 0.007268 | 0.887404 | 0.921643 |
| CFHR1      | 1q31.3        | -0.00725 | 0.887686 | 0.921873 |
| CLDN16     | 3q28          | -0.00725 | 0.887718 | 0.921873 |
| CCL3L1     | 17q21.1       | -0.00724 | 0.887789 | 0.921899 |
| HDGFL1     | 6p22.3        | 0.007235 | 0.887916 | 0.921984 |
| ODF1       | 8q22.3        | 0.007223 | 0.888096 | 0.922095 |
| AHSP       | 16p11.2       | -0.00722 | 0.888152 | 0.922095 |
| LOC340357  | 8p23.1-p22    | 0.007219 | 0.888162 | 0.922095 |
| TCAIM      | 3p21.31       | -0.0072  | 0.888386 | 0.922188 |
| DEFB118    | 20q11.21      | -0.0072  | 0.888435 | 0.922188 |
| IFNA14     | 9p21.3        | -0.0072  | 0.888435 | 0.922188 |
| OR6K6      | 1q23.1        | 0.007201 | 0.888435 | 0.922188 |
| GJB3       | 1p34.3        | 0.00718  | 0.888757 | 0.922474 |
| SYK        | 9q22.2        | 0.007175 | 0.888833 | 0.922492 |
| PAF1       | 19q13.2       | -0.00717 | 0.888866 | 0.922492 |
| NUP210     | 3p25.1        | -0.00717 | 0.888943 | 0.922523 |
| ZNF649     | 19q13.41      | -0.00715 | 0.889184 | 0.922726 |
| PDE6A      | 5q32          | -0.00715 | 0.889256 | 0.922752 |
| ZNF608     | 5q23.2        | 0.007126 | 0.889585 | 0.923047 |
| TRIML1     | 4q35.2        | 0.007103 | 0.88994  | 0.923366 |
| ATXN10     | 22q13.31      | -0.00709 | 0.890096 | 0.923481 |
| ANO10      | 3p22.1-p21.33 | -0.00708 | 0.890262 | 0.923585 |
| LINC00113  | 21q21.3       | 0.007081 | 0.890289 | 0.923585 |
| HECTD2-AS1 | 10q23.32      | 0.007075 | 0.89038  | 0.923632 |
| ZNF329     | 19q13.43      | 0.007071 | 0.890444 | 0.92365  |
| USP11      | Xp11.3        | 0.007057 | 0.890653 | 0.923819 |
| CYP7A1     | 8q12.1        | 0.007046 | 0.890828 | 0.923953 |
| FAM205BP   | 9p13.3        | -0.00703 | 0.891111 | 0.924199 |
| MMP21      | 10q26.2       | 0.00702  | 0.891218 | 0.924223 |



|              |               |          |          |          |
|--------------|---------------|----------|----------|----------|
| NXT2         | Xq23          | -0.00702 | 0.891226 | 0.924223 |
| GAA          | 17q25.3       | 0.00699  | 0.891687 | 0.924653 |
| ZNF311       | 6p22.1        | 0.006979 | 0.891853 | 0.924777 |
| LOC100268168 | 5q35.1        | -0.00697 | 0.892004 | 0.924885 |
| PDP1         | 8q22.1        | -0.00696 | 0.892151 | 0.924901 |
| ANO3         | 11p14.3-p14.2 | 0.00696  | 0.892153 | 0.924901 |
| CDKL4        | 2p22.1        | -0.00696 | 0.892157 | 0.924901 |
| KCNIP4-IT1   | 4p15.2        | -0.00694 | 0.892396 | 0.925068 |
| LINC00597    | 15q24.3       | 0.006943 | 0.89241  | 0.925068 |
| TSBP1        | 6p21.32       | 0.00693  | 0.892603 | 0.925219 |
| LINC02209    | 8p12          | -0.00692 | 0.892702 | 0.925274 |
| HADHA        | 2p23.3        | -0.00691 | 0.892854 | 0.925336 |
| CDON         | 11q24.2       | 0.006914 | 0.892854 | 0.925336 |
| FOXN4        | 12q24.11      | 0.0069   | 0.89307  | 0.925512 |
| OR51B4       | 11p15.4       | -0.00688 | 0.893347 | 0.925722 |
| ANKRD20A8P   | 2q11.1        | 0.006878 | 0.893414 | 0.925722 |
| SPRR2E       | 1q21.3        | -0.00687 | 0.893498 | 0.925722 |
| CYP2C8       | 10q23.33      | 0.006869 | 0.893541 | 0.925722 |
| CHRNB3       | 8p11.21       | 0.006866 | 0.893588 | 0.925722 |
| CDC23        | 5q31.2        | -0.00687 | 0.893594 | 0.925722 |
| CLIC3        | 9q34.3        | 0.006866 | 0.893597 | 0.925722 |
| LAIR2        | 19q13.42      | 0.006855 | 0.893762 | 0.925845 |
| NFATC4       | 14q12         | 0.006837 | 0.894048 | 0.926063 |
| FCAMR        | 1q32.1        | 0.006835 | 0.894068 | 0.926063 |
| PRCP         | 11q14.1       | -0.00683 | 0.894111 | 0.926063 |
| CXXC1        | 18q21.1       | -0.00683 | 0.894181 | 0.926088 |
| MED11        | 17p13.2       | 0.006822 | 0.89428  | 0.926097 |
| YWHAE        | 17p13.3       | -0.00682 | 0.894287 | 0.926097 |
| NUBPL        | 14q12         | 0.006818 | 0.894328 | 0.926097 |
| HBG2         | 11p15.4       | 0.006809 | 0.894468 | 0.926193 |
| EPPIN        | 20q13.12      | -0.00681 | 0.894535 | 0.926215 |
| GPAT4        | 8p11.21       | -0.00679 | 0.894751 | 0.926346 |
| CRX          | 19q13.33      | 0.006791 | 0.894754 | 0.926346 |
| PRSS23       | 11q14.2       | 0.00676  | 0.895229 | 0.92679  |
| SLC25A52     | 18q12.1       | -0.00675 | 0.895325 | 0.926841 |
| RPL4         | 15q22.31      | 0.00675  | 0.895375 | 0.926845 |
| OR5L1        | 11q12.1       | 0.006747 | 0.895432 | 0.926856 |
| PPM1F        | 22q11.22      | -0.00673 | 0.895703 | 0.927082 |
| SLC22A14     | 3p22.2        | 0.006727 | 0.895743 | 0.927082 |
| SPNS2        | 17p13.2       | -0.00666 | 0.896702 | 0.928027 |
| UTY          | Yq11.221      | 0.006655 | 0.896845 | 0.928127 |
| RHOB         | 2p24.1        | 0.006647 | 0.896964 | 0.928202 |
| NPDC1        | 9q34.3        | 0.006633 | 0.89718  | 0.928378 |
| P2RX3        | 11q12.1       | -0.00662 | 0.89734  | 0.928495 |
| OR7E24       | 19p13.2       | -0.00661 | 0.897516 | 0.928629 |
| CCL24        | 7q11.23       | 0.006603 | 0.897649 | 0.928719 |
| SGK2         | 20q13.12      | -0.0066  | 0.897737 | 0.928762 |
| LOC100129055 | 10p11.1       | -0.00659 | 0.897835 | 0.928816 |
| SALL3        | 18q23         | -0.00659 | 0.897899 | 0.928834 |
| AGBL3        | 7q33          | -0.00657 | 0.898109 | 0.929003 |
| RPL7L1       | 6p21.1        | -0.00655 | 0.898454 | 0.929312 |
| PPP1R15A     | 19q13.33      | 0.006536 | 0.898677 | 0.929463 |
| PCDHGA8      | 5q31.3        | -0.00653 | 0.898709 | 0.929463 |
| FADS1        | 11q12.2       | 0.006529 | 0.898783 | 0.929463 |
| LAT          | 16p11.2       | -0.00653 | 0.898786 | 0.929463 |
| OR5B12       | 11q12.1       | -0.00651 | 0.899082 | 0.929722 |
| ANXA8        | 10q11.22      | 0.006504 | 0.899171 | 0.929766 |
| CTSD         | 11p15.5       | 0.006501 | 0.899224 | 0.929772 |

|            |               |          |          |          |
|------------|---------------|----------|----------|----------|
| PRMT6      | 1p13.3        | 0.006495 | 0.899314 | 0.929817 |
| PTK2       | 8q24.3        | 0.006478 | 0.899573 | 0.930037 |
| C8B        | 1p32.2        | 0.006469 | 0.899721 | 0.930126 |
| ATP8B5P    | 9p13.3        | 0.006467 | 0.899752 | 0.930126 |
| PBX2       | 6p21.32       | 0.006451 | 0.899984 | 0.930318 |
| SYT12      | 11q13.2       | -0.00643 | 0.90032  | 0.930603 |
| GUF1       | 4p12          | -0.00643 | 0.900353 | 0.930603 |
| COX6A2     | 16p11.2       | -0.0064  | 0.90083  | 0.931048 |
| CCDC32     | 15q15.1       | 0.006388 | 0.900971 | 0.931145 |
| RAB41      | Xq13.1        | 0.006361 | 0.901384 | 0.931525 |
| DIRC1      | 2q32.2        | 0.006345 | 0.90163  | 0.931731 |
| ERICH5     | 8q22.2        | -0.00634 | 0.901724 | 0.931763 |
| TGM7       | 15q15.2-q15.3 | -0.00634 | 0.901769 | 0.931763 |
| SNORA75    | 2q37.1        | 0.006332 | 0.901825 | 0.931763 |
| PAQR7      | 1p36.11       | -0.00633 | 0.901847 | 0.931763 |
| ZNF117     | 7q11.21       | -0.00633 | 0.90192  | 0.93177  |
| BCKDHA     | 19q13.2       | 0.006324 | 0.901947 | 0.93177  |
| SLC4A3     | 2q35          | 0.006319 | 0.902028 | 0.931806 |
| VCX2       | Xp22.31       | -0.00631 | 0.902131 | 0.931864 |
| SMR3A      | 4q13.3        | 0.006276 | 0.902693 | 0.932315 |
| TFAMP1     | 7p22.3        | -0.00628 | 0.902701 | 0.932315 |
| BPIFB3     | 20q11.21      | -0.00627 | 0.902754 | 0.932315 |
| SPANXN4    | Xq27.3        | 0.006272 | 0.902754 | 0.932315 |
| SMCP       | 1q21.3        | 0.006265 | 0.902862 | 0.932379 |
| TRIP6      | 7q22.1        | -0.00625 | 0.903083 | 0.932558 |
| SERPINC1   | 1q25.1        | 0.006231 | 0.903388 | 0.932826 |
| ZFP1       | 16q23.1       | 0.006212 | 0.903684 | 0.933083 |
| FRAT1      | 10q24.1       | 0.006208 | 0.903747 | 0.9331   |
| ANXA3      | 4q21.21       | -0.00619 | 0.904092 | 0.933322 |
| EPHX2      | 8p21.2-p21.1  | -0.00618 | 0.904146 | 0.933322 |
| NCKAP5L    | 12q13.12      | -0.00618 | 0.904222 | 0.933322 |
| ZNF415     | 19q13.42      | -0.00618 | 0.904229 | 0.933322 |
| GLUD1      | 10q23.2       | -0.00617 | 0.904252 | 0.933322 |
| RRN3P3     | 16p12.2       | 0.006172 | 0.904288 | 0.933322 |
| SDR42E1    | 16q23.3       | -0.00617 | 0.904328 | 0.933322 |
| DYRK4      | 12p13.32      | -0.00617 | 0.904335 | 0.933322 |
| BCDIN3D    | 12q13.12      | -0.00616 | 0.904421 | 0.933363 |
| SASS6      | 1p21.2        | -0.00615 | 0.904624 | 0.933504 |
| FBXO15     | 18q22.3       | 0.006149 | 0.904651 | 0.933504 |
| FAM76A     | 1p35.3        | 0.006144 | 0.904734 | 0.933541 |
| LINC01565  | 3q21.3        | 0.006108 | 0.905282 | 0.934059 |
| VAMP1      | 12p13.31      | 0.006098 | 0.905445 | 0.934179 |
| GOLGA8EP   | 15q11.2       | -0.00609 | 0.905598 | 0.934289 |
| GABPB1-AS1 | 15q21.2       | -0.00608 | 0.905691 | 0.934298 |
| TOP2A      | 17q21.2       | 0.006081 | 0.9057   | 0.934298 |
| ATP1B4     | Xq24          | 0.00607  | 0.905878 | 0.934433 |
| PSD2       | 5q31.2        | -0.00605 | 0.906181 | 0.934691 |
| PIP5K1P1   | 6p24.3        | -0.00605 | 0.906222 | 0.934691 |
| TTC41P     | 12q23.3       | -0.00603 | 0.906561 | 0.934959 |
| NPHP3-AS1  | 3q22.1        | 0.006024 | 0.906575 | 0.934959 |
| SRPK1      | 6p21.31       | -0.00602 | 0.906641 | 0.934979 |
| METRNL     | 17q25.3       | -0.00601 | 0.906764 | 0.935058 |
| DCDC1      | 11p13         | 0.005991 | 0.907086 | 0.935329 |
| HES1       | 3q29          | -0.00599 | 0.907136 | 0.935329 |
| TEPP       | 16q21         | 0.005986 | 0.907167 | 0.935329 |
| INTS6      | 13q14.3       | 0.005973 | 0.907365 | 0.935468 |
| SYTL1      | 1p36.11       | -0.00597 | 0.907395 | 0.935468 |
| CASKIN1    | 16p13.3       | -0.00595 | 0.907721 | 0.935728 |

|              |               |          |          |          |
|--------------|---------------|----------|----------|----------|
| ZNF334       | 20q13.12      | -0.00595 | 0.90774  | 0.935728 |
| RRP15        | 1q41          | 0.00593  | 0.908029 | 0.935976 |
| LINC02694    | 15q14         | -0.00592 | 0.908227 | 0.936133 |
| MX1          | 21q22.3       | 0.005912 | 0.908316 | 0.936176 |
| RARRES2      | 7q36.1        | -0.0059  | 0.908507 | 0.936325 |
| SLC1A6       | 19p13.12      | -0.00589 | 0.908595 | 0.936367 |
| LETM1        | 4p16.3        | 0.005887 | 0.908698 | 0.936418 |
| DMRT1        | 9p24.3        | -0.00588 | 0.908737 | 0.936418 |
| PACS1        | 11q13.1-q13.2 | 0.005876 | 0.908868 | 0.936504 |
| CTSW         | 11q13.1       | 0.005852 | 0.90923  | 0.936776 |
| GJB4         | 1p34.3        | 0.005852 | 0.909237 | 0.936776 |
| NEUROD4      | 12q13.2       | 0.00585  | 0.909272 | 0.936776 |
| KCNK7        | 11q13.1       | 0.005839 | 0.90943  | 0.936886 |
| OR3A1        | 17p13.3       | -0.00584 | 0.909472 | 0.936886 |
| FBXO4        | 5p13.1        | 0.00583  | 0.909579 | 0.936948 |
| KCNH3        | 12q13.12      | 0.005825 | 0.909655 | 0.936978 |
| SLITRK1      | 13q31.1       | 0.005815 | 0.909811 | 0.937091 |
| OR1A1        | 17p13.3       | -0.00581 | 0.909926 | 0.937122 |
| ATP4B        | 13q34         | -0.00581 | 0.909937 | 0.937122 |
| SPATA16      | 3q26.31       | -0.0058  | 0.909982 | 0.937122 |
| LEUTX        | 19q13.2       | 0.005791 | 0.910176 | 0.937273 |
| SBK2         | 19q13.42      | -0.00579 | 0.910233 | 0.937284 |
| NPIP13       | 16p11.2       | -0.00578 | 0.91034  | 0.937346 |
| PAIP1        | 5p12          | 0.00577  | 0.910507 | 0.93747  |
| PSCA         | 8q24.3        | -0.00577 | 0.910572 | 0.937489 |
| HTR1A        | 5q12.3        | -0.00572 | 0.911203 | 0.93809  |
| C3ORF33      | 3q25.31       | -0.00569 | 0.911674 | 0.938527 |
| SLC25A30     | 13q14.13      | 0.005683 | 0.911845 | 0.938641 |
| ZAP70        | 2q11.2        | -0.00568 | 0.911914 | 0.938641 |
| EDDM3B       | 14q11.2       | -0.00568 | 0.911925 | 0.938641 |
| HAS1         | 19q13.41      | 0.005666 | 0.912103 | 0.938776 |
| MUC16        | 19p13.2       | -0.00565 | 0.912335 | 0.938965 |
| TIMP1        | Xp11.3        | 0.005647 | 0.912409 | 0.938994 |
| KIAA1841     | 2p15          | -0.00564 | 0.912516 | 0.939054 |
| SCTR         | 2q14.2        | 0.005634 | 0.912598 | 0.939054 |
| HDDC3        | 15q26.1       | -0.00563 | 0.912609 | 0.939054 |
| NPFFR1       | 10q22.1       | 0.005615 | 0.912899 | 0.939304 |
| RGS20        | 8q11.23       | 0.005602 | 0.9131   | 0.939464 |
| PPP1R11      | 6p22.1        | -0.0056  | 0.913164 | 0.939481 |
| PGLYRP4      | 1q21.3        | -0.00559 | 0.913232 | 0.939496 |
| PGLYRP2      | 19p13.12      | -0.00559 | 0.913273 | 0.939496 |
| DLX6         | 7q21.3        | -0.00559 | 0.913321 | 0.939498 |
| SCARNA11     | 12p13.31      | -0.00558 | 0.913405 | 0.939536 |
| PTPDC1       | 9q22.32       | -0.00558 | 0.913457 | 0.939541 |
| EPHA2        | 1p36.13       | 0.005563 | 0.913693 | 0.939736 |
| OR6B2        | 2q37.3        | -0.00556 | 0.913795 | 0.939773 |
| CCDC163      | 1p34.1        | -0.00556 | 0.913823 | 0.939773 |
| GNRH2        | 20p13         | -0.00554 | 0.914071 | 0.93998  |
| INTS4        | 11q14.1       | 0.005521 | 0.914348 | 0.940206 |
| S100A12      | 1q21.3        | 0.005519 | 0.914386 | 0.940206 |
| FAM169B      | 15q26.3       | -0.00548 | 0.914907 | 0.940694 |
| DKFZP434H168 | 16q13         | -0.00544 | 0.915622 | 0.941381 |
| ARGFX        | 3q13.33       | 0.005433 | 0.915705 | 0.941419 |
| UBTF         | 17q21.31      | 0.005426 | 0.915822 | 0.94149  |
| RIPOR1       | 16q22.1       | 0.005412 | 0.916035 | 0.941661 |
| DEFB109B     | 8p23.1        | -0.0054  | 0.916149 | 0.941729 |
| KCTD2        | 17q25.1       | 0.005395 | 0.916292 | 0.941758 |
| SGO1         | 3p24.3        | -0.00539 | 0.916305 | 0.941758 |

|              |          |          |          |          |
|--------------|----------|----------|----------|----------|
| GSPT2        | Xp11.22  | -0.00539 | 0.916318 | 0.941758 |
| TNNI2        | 11p15.5  | -0.00539 | 0.916431 | 0.941821 |
| SNORA38      | 6p21.33  | -0.00538 | 0.916473 | 0.941821 |
| GLRA3        | 4q34.1   | 0.005378 | 0.916567 | 0.941869 |
| OR2T1        | 1q44     | 0.005343 | 0.917105 | 0.942325 |
| TXNDC8       | 9q31.3   | -0.00534 | 0.917105 | 0.942325 |
| FNDC5        | 1p35.1   | 0.005336 | 0.917208 | 0.942367 |
| HTR1E        | 6q14.3   | -0.00533 | 0.91724  | 0.942367 |
| RAB25        | 1q22     | -0.00533 | 0.91729  | 0.94237  |
| PRAC1        | 17q21.32 | -0.00533 | 0.917359 | 0.942393 |
| OR4F5        | 1p36.33  | 0.00532  | 0.917462 | 0.942424 |
| MCCC2        | 5q13.2   | -0.00532 | 0.917483 | 0.942424 |
| TRIM6-TRIM34 | 11p15.4  | -0.0053  | 0.917692 | 0.942502 |
| SLC12A1      | 15q21.1  | 0.005303 | 0.917722 | 0.942502 |
| LINC00905    | 19p13.12 | -0.0053  | 0.917724 | 0.942502 |
| ABCG4        | 11q23.3  | 0.005301 | 0.91775  | 0.942502 |
| SEC14L4      | 22q12.2  | -0.0053  | 0.917795 | 0.942502 |
| TATDN2       | 3p25.3   | -0.00529 | 0.917952 | 0.94258  |
| ALB          | 4q13.3   | -0.00529 | 0.917965 | 0.94258  |
| TAS2R8       | 12p13.2  | 0.005279 | 0.918086 | 0.942657 |
| CEP112       | 17q24.1  | 0.005262 | 0.918348 | 0.942797 |
| ENPP1        | 6q23.2   | -0.00526 | 0.918375 | 0.942797 |
| FSD1L        | 9q31.2   | 0.00526  | 0.91838  | 0.942797 |
| FCHO1        | 19p13.11 | -0.00526 | 0.918412 | 0.942797 |
| ZNF550       | 19q13.43 | 0.005248 | 0.918565 | 0.942906 |
| VENTXP7      | 3p24.3   | -0.00522 | 0.919064 | 0.943349 |
| HOXB8        | 17q21.32 | -0.00521 | 0.919091 | 0.943349 |
| HRK          | 12q24.22 | 0.005195 | 0.919385 | 0.943603 |
| ARHGAP23     | 17q12    | 0.005177 | 0.919673 | 0.943851 |
| DNAJC6       | 1p31.3   | -0.00516 | 0.919973 | 0.94411  |
| LINC00235    | 16p13.3  | -0.00515 | 0.920061 | 0.944152 |
| UBQLNL       | 11p15.4  | 0.005137 | 0.920284 | 0.944332 |
| GCC1         | 7q32.1   | 0.005129 | 0.920409 | 0.944412 |
| NXPH3        | 17q21.33 | -0.00512 | 0.920536 | 0.944487 |
| MIR1-1HG     | 20q13.33 | 0.005118 | 0.920576 | 0.944487 |
| PLPPR3       | 19p13.3  | -0.00509 | 0.921088 | 0.944963 |
| CLTB         | 5q35.2   | -0.00508 | 0.921178 | 0.945008 |
| DUSP3        | 17q21.31 | 0.005066 | 0.921378 | 0.945164 |
| XIST         | Xq13.2   | -0.00505 | 0.921692 | 0.945438 |
| SMCR5        | -        | 0.005016 | 0.922153 | 0.945862 |
| ANKRD30BL    | 2q21.2   | -0.005   | 0.922429 | 0.946022 |
| TMEM37       | 2q14.2   | 0.004998 | 0.92243  | 0.946022 |
| DGKQ         | 4p16.3   | -0.005   | 0.92245  | 0.946022 |
| TRIM43       | 2q11.1   | -0.00499 | 0.922509 | 0.946033 |
| PELP1        | 17p13.2  | 0.004982 | 0.922684 | 0.946135 |
| CST11        | 20p11.21 | 0.00498  | 0.922714 | 0.946135 |
| EPB41L5      | 2q14.2   | 0.004978 | 0.92275  | 0.946135 |
| OR10AD1      | 12q13.11 | -0.00496 | 0.92299  | 0.946278 |
| FAM76B       | 11q21    | 0.004962 | 0.92299  | 0.946278 |
| CLDN10       | 13q32.1  | 0.00496  | 0.923031 | 0.946278 |
| PIM2         | Xp11.23  | 0.004953 | 0.92314  | 0.946326 |
| WEE2         | 7q34     | 0.00495  | 0.923172 | 0.946326 |
| ABCB1        | 7q21.12  | -0.00494 | 0.923336 | 0.946446 |
| DPH3         | 3p25.1   | 0.004928 | 0.923516 | 0.946582 |
| ATAD2        | 8q24.13  | 0.004911 | 0.923779 | 0.946772 |
| C15ORF40     | 15q25.2  | -0.00491 | 0.923796 | 0.946772 |
| NKAIN3       | 8q12.3   | 0.0049   | 0.923951 | 0.946882 |
| GOLGA6B      | 15q24.1  | 0.004896 | 0.924014 | 0.946898 |

|            |                |          |          |          |
|------------|----------------|----------|----------|----------|
| BAIAP3     | 16p13.3        | -0.00489 | 0.924119 | 0.946957 |
| SLC22A25   | 11q12.3        | -0.00488 | 0.924289 | 0.947005 |
| FAM74A4    | 9q12           | 0.004878 | 0.92429  | 0.947005 |
| MORC1      | 3q13.13        | -0.00488 | 0.924307 | 0.947005 |
| LINC00159  | 21q22.11       | -0.00484 | 0.92482  | 0.947481 |
| PCARE      | 2p23.2         | -0.00483 | 0.925012 | 0.947629 |
| ZBTB11-AS1 | 3q12.3         | -0.00483 | 0.925059 | 0.947629 |
| TMEM144    | 4q32.1         | -0.00482 | 0.925165 | 0.94769  |
| RPTOR      | 17q25.3        | 0.004817 | 0.925238 | 0.947716 |
| INSC       | 11p15.2        | 0.004808 | 0.925371 | 0.947803 |
| TRARG1     | 17p13.3        | 0.004797 | 0.925546 | 0.947894 |
| SNORA70    | Xq28           | 0.004797 | 0.925554 | 0.947894 |
| ADGRG4     | Xq26.3         | -0.00479 | 0.925619 | 0.947913 |
| RANBP6     | 9p24.1         | -0.00479 | 0.925691 | 0.947938 |
| EIF1B      | 3p22.1         | 0.004746 | 0.926341 | 0.948555 |
| MAGED4     | Xp11.22        | 0.004732 | 0.926551 | 0.948709 |
| LOC729603  | 6q25.3         | -0.00473 | 0.926586 | 0.948709 |
| DPRXP4     | 17q11.2        | -0.00472 | 0.926686 | 0.948725 |
| OXTR       | 3p25.3         | 0.004723 | 0.926698 | 0.948725 |
| LPAL2      | 6q25.3         | 0.00472  | 0.926745 | 0.948725 |
| EIF3L      | 22q13.1        | -0.00468 | 0.927367 | 0.949314 |
| NOBOX      | 7q35           | 0.004655 | 0.927744 | 0.949651 |
| CHAMP1     | 13q34          | -0.00465 | 0.927814 | 0.949675 |
| LHFPL5     | 6p21.31        | -0.00463 | 0.928081 | 0.9499   |
| GZMH       | 14q12          | -0.00461 | 0.928364 | 0.950134 |
| IL31       | 12q24.31       | 0.004612 | 0.928405 | 0.950134 |
| ASPG       | 14q32.33       | 0.004603 | 0.928547 | 0.95023  |
| SNORA80E   | 1q22           | 0.004589 | 0.928766 | 0.950406 |
| LINC00242  | 6q27           | 0.004585 | 0.928832 | 0.950416 |
| GRSF1      | 4q13.3         | -0.00458 | 0.92887  | 0.950416 |
| SAMD14     | 17q21.33       | -0.00454 | 0.929484 | 0.950995 |
| LINC00928  | 15q26.1        | 0.004534 | 0.929623 | 0.951089 |
| RNF41      | 12q13.3        | 0.004522 | 0.9298   | 0.951222 |
| ZDHHC14    | 6q25.3         | 0.004505 | 0.93007  | 0.951447 |
| LOC388242  | 16p11.2        | -0.0045  | 0.930137 | 0.951447 |
| OR9Q2      | 11q12.1        | -0.0045  | 0.930163 | 0.951447 |
| PPEF2      | 4q21.1         | 0.004485 | 0.930373 | 0.951613 |
| POLR1A     | 2p11.2         | 0.004479 | 0.93047  | 0.95164  |
| STRBP      | 9q33.3         | 0.004473 | 0.930557 | 0.95164  |
| HAPLN4     | 19p13.11       | 0.004472 | 0.930578 | 0.95164  |
| OR5H2      | 3q11.2         | -0.00447 | 0.93059  | 0.95164  |
| IFT74      | 9p21.2         | -0.00446 | 0.930714 | 0.951718 |
| RNF217-AS1 | 6q22.31        | -0.00445 | 0.930951 | 0.951912 |
| GNA12      | 7p22.3-p22.2   | 0.004438 | 0.931104 | 0.95202  |
| CC2D2B     | 10q24.1        | 0.004403 | 0.931639 | 0.952519 |
| NLRP13     | 19q13.43       | -0.0044  | 0.931696 | 0.952528 |
| LCN8       | 9q34.3         | 0.004388 | 0.93188  | 0.952668 |
| GRM3       | 7q21.11-q21.12 | -0.00438 | 0.931953 | 0.952693 |
| PGBD1      | 6p22.1         | 0.004379 | 0.932017 | 0.952693 |
| VMO1       | 17p13.2        | 0.004377 | 0.932047 | 0.952693 |
| OVCH1      | 12p11.22       | -0.00437 | 0.932223 | 0.952824 |
| CCDC70     | 13q14.3        | -0.00436 | 0.932275 | 0.952828 |
| CGB2       | 19q13.33       | -0.00435 | 0.93239  | 0.952896 |
| CYP27B1    | 12q14.1        | 0.00435  | 0.932474 | 0.952896 |
| H2BFXP     | Xq22.2         | 0.004349 | 0.932484 | 0.952896 |
| NVL        | 1q42.11        | -0.00434 | 0.932649 | 0.953016 |
| LRCH1      | 13q14.13-q14.2 | 0.004306 | 0.933141 | 0.95347  |
| TFB2M      | 1q44           | 0.004299 | 0.933254 | 0.953537 |

|              |                    |          |          |          |
|--------------|--------------------|----------|----------|----------|
| RNF44        | 5q35.2             | -0.0043  | 0.933308 | 0.953543 |
| RBM46        | 4q32.1             | 0.004259 | 0.933871 | 0.95407  |
| CCNE2        | 8q22.1             | -0.00424 | 0.934218 | 0.954376 |
| TFEB         | 6p21.1             | -0.00422 | 0.934485 | 0.9546   |
| MED15        | 22q11.21           | 0.004215 | 0.934565 | 0.954633 |
| RNF133       | 7q31.32            | -0.00421 | 0.93469  | 0.954659 |
| SLC26A5      | 7q22.1             | -0.0042  | 0.93474  | 0.954659 |
| TEC          | 4p12-p11           | 0.004203 | 0.934748 | 0.954659 |
| MYCNOS       | 2p24.3             | 0.0042   | 0.934796 | 0.954659 |
| DUSP13       | 10q22.2            | -0.0042  | 0.934829 | 0.954659 |
| SHOX         | Xp22.33 and Yp11.2 | -0.00418 | 0.935081 | 0.954868 |
| MED9         | 17p11.2            | 0.004163 | 0.935362 | 0.955106 |
| C16ORF82     | 16p12.1            | -0.00416 | 0.935439 | 0.955136 |
| SEPTIN12     | 16p13.3            | -0.00415 | 0.935533 | 0.955162 |
| GABARAP      | 17p13.1            | 0.004147 | 0.935609 | 0.955162 |
| BEX5         | Xq22.1             | 0.004146 | 0.935631 | 0.955162 |
| ATP6V0A1     | 17q21.2            | -0.00414 | 0.935655 | 0.955162 |
| ADH7         | 4q23               | 0.004113 | 0.936141 | 0.955609 |
| SRSF1        | 17q22              | 0.004096 | 0.936399 | 0.955824 |
| GPX3         | 5q33.1             | 0.004075 | 0.936729 | 0.956063 |
| GSTM2        | 1p13.3             | 0.004073 | 0.936763 | 0.956063 |
| PRMT8        | 12p13.32           | 0.004072 | 0.936777 | 0.956063 |
| CXCL5        | 4q13.3             | -0.00407 | 0.936856 | 0.956095 |
| LY6D         | 8q24.3             | 0.004063 | 0.936919 | 0.956095 |
| ATXN8OS      | 13q21.33           | -0.00406 | 0.936997 | 0.956095 |
| OR4C12       | 11p11.12           | 0.004054 | 0.937046 | 0.956095 |
| CCDC18       | 1p22.1             | 0.004054 | 0.937046 | 0.956095 |
| ZNF383       | 19q13.12           | 0.004017 | 0.937632 | 0.956643 |
| PEX5L        | 3q26.33            | -0.004   | 0.937872 | 0.956837 |
| ARMCX5       | Xq22.1             | -0.00399 | 0.93798  | 0.956837 |
| FAM74A3      | 9q21.11            | 0.003993 | 0.938005 | 0.956837 |
| OR4A47       | 11p11.2            | -0.00399 | 0.93804  | 0.956837 |
| PAX6         | 11p13              | 0.003989 | 0.93806  | 0.956837 |
| CTSC         | 11q14.2            | 0.003963 | 0.938464 | 0.957188 |
| OCM          | 7p22.1             | -0.00396 | 0.9385   | 0.957188 |
| VAMP7        | Xq28 and Yq12      | 0.003936 | 0.938878 | 0.957524 |
| ZNF554       | 19p13.3            | -0.0039  | 0.939398 | 0.958006 |
| C21ORF62-AS1 | 21q22.11           | -0.00389 | 0.939533 | 0.958095 |
| ZNF764       | 16p11.2            | 0.003875 | 0.939822 | 0.958332 |
| FMO6P        | 1q24.3             | -0.00387 | 0.939861 | 0.958332 |
| GPCPD1       | 20p12.3            | 0.003858 | 0.940096 | 0.958522 |
| PSMA4        | 15q25.1            | -0.00385 | 0.940242 | 0.958596 |
| C5ORF46      | 5q32               | -0.00384 | 0.940308 | 0.958596 |
| SPO11        | 20q13.31           | -0.00384 | 0.940312 | 0.958596 |
| FKBP10       | 17q21.2            | -0.00384 | 0.940379 | 0.958616 |
| SOX3         | Xq27.1             | -0.00381 | 0.940889 | 0.959087 |
| GSAP         | 7q11.23            | -0.00379 | 0.941107 | 0.95926  |
| SPAG11A      | 8p23.1             | 0.003777 | 0.941345 | 0.959448 |
| CXCL11       | 4q21.1             | 0.003774 | 0.941387 | 0.959448 |
| LCE1D        | 1q21.3             | -0.00377 | 0.941529 | 0.959527 |
| ZNF252P      | 8q24.3             | -0.00376 | 0.94156  | 0.959527 |
| RAB3A        | 19p13.11           | 0.003755 | 0.941682 | 0.959569 |
| HBBP1        | 11p15.4            | -0.00375 | 0.941697 | 0.959569 |
| TBR1         | 2q24.2             | 0.00374  | 0.941922 | 0.959749 |
| NPPB         | 1p36.22            | 0.003735 | 0.941996 | 0.959776 |
| SERPINB13    | 18q21.33           | -0.00372 | 0.942178 | 0.959897 |
| PRKN         | 6q26               | 0.003721 | 0.942211 | 0.959897 |
| NUP54        | 4q21.1             | -0.00371 | 0.942331 | 0.959971 |

|            |          |          |          |          |
|------------|----------|----------|----------|----------|
| CLEC2L     | 7q34     | 0.003704 | 0.94248  | 0.960069 |
| KIR2DL1    | 19q13.42 | -0.0037  | 0.942525 | 0.960069 |
| ACTR6      | 12q23.1  | -0.0037  | 0.942572 | 0.960069 |
| TAF5       | 10q24.33 | -0.00368 | 0.942895 | 0.96035  |
| ALDH2      | 12q24.12 | -0.00367 | 0.943076 | 0.960485 |
| GSTA2      | 6p12.2   | -0.00364 | 0.943483 | 0.960851 |
| GPX7       | 1p32.3   | 0.003597 | 0.94414  | 0.961433 |
| KIAA1191   | 5q35.2   | -0.0036  | 0.94415  | 0.961433 |
| ICOSLG     | 21q22.3  | 0.003582 | 0.944371 | 0.961577 |
| LINC00635  | 3q13.12  | 0.003581 | 0.944388 | 0.961577 |
| MAX        | 14q23.3  | 0.003576 | 0.944468 | 0.961609 |
| TBC1D24    | 16p13.3  | 0.003541 | 0.945002 | 0.962058 |
| ELL3       | 15q15.3  | 0.003541 | 0.945005 | 0.962058 |
| GCNT7      | 20q13.31 | 0.003519 | 0.945339 | 0.962349 |
| SKP1       | 5q31.1   | 0.003512 | 0.945449 | 0.962413 |
| PRG4       | 1q31.1   | -0.0035  | 0.945619 | 0.962537 |
| COX8C      | 14q32.12 | 0.003489 | 0.945812 | 0.962684 |
| TMEM95     | 17p13.1  | 0.003471 | 0.946094 | 0.962923 |
| GPR158-AS1 | 10p12.1  | -0.00346 | 0.946258 | 0.96304  |
| SHMT1      | 17p11.2  | -0.00344 | 0.946547 | 0.963284 |
| MAPK11     | 22q13.33 | -0.00344 | 0.946594 | 0.963284 |
| PRICKLE4   | 6p21.1   | 0.003402 | 0.947157 | 0.963764 |
| NPSR1-AS1  | 7p14.3   | 0.003402 | 0.947162 | 0.963764 |
| WTIP       | 19q13.11 | 0.003374 | 0.947599 | 0.96416  |
| MBL2       | 10q21.1  | 0.003367 | 0.947699 | 0.964213 |
| FAM41AY1   | Yq11.222 | 0.003362 | 0.947784 | 0.96425  |
| DNAAF4     | 15q21.3  | 0.003339 | 0.948137 | 0.96456  |
| HELLS      | 10q23.33 | -0.00333 | 0.948347 | 0.964694 |
| TMEM121    | 14q32.33 | -0.00332 | 0.948374 | 0.964694 |
| FAM50B     | 6p25.2   | -0.00332 | 0.948437 | 0.964694 |
| SLC15A2    | 3q13.33  | -0.00332 | 0.94846  | 0.964694 |
| SLC22A13   | 3p22.2   | 0.003303 | 0.948688 | 0.964876 |
| LYPD1      | 2q21.2   | 0.003292 | 0.94886  | 0.965001 |
| ZNF92      | 7q11.21  | 0.003279 | 0.949072 | 0.965162 |
| DIO3       | 14q32.31 | 0.003276 | 0.949113 | 0.965162 |
| PRDM15     | 21q22.3  | -0.00327 | 0.949188 | 0.965189 |
| SNX12      | Xq13.1   | 0.003266 | 0.949269 | 0.965221 |
| SLC52A3    | 20p13    | -0.00324 | 0.949626 | 0.965536 |
| AFM        | 4q13.3   | -0.00323 | 0.949755 | 0.965618 |
| GSTT4      | 22q11.23 | -0.00323 | 0.949815 | 0.96563  |
| LOC285593  | 5q35.2   | 0.003216 | 0.950047 | 0.965783 |
| MYOZ1      | 10q22.2  | -0.00321 | 0.950104 | 0.965783 |
| ZNF737     | 19p12    | -0.00321 | 0.95011  | 0.965783 |
| ZNF560     | 19p13.2  | 0.003198 | 0.950325 | 0.965952 |
| SYT14P1    | 4q13.2   | -0.00319 | 0.950452 | 0.966032 |
| ZNF780B    | 19q13.2  | -0.00317 | 0.950731 | 0.966267 |
| NEURL4     | 17p13.1  | -0.00314 | 0.951202 | 0.966697 |
| CMAS       | 12p12.1  | 0.003138 | 0.951259 | 0.966705 |
| PRR27      | 4q13.3   | 0.003128 | 0.951415 | 0.966815 |
| KCNH8      | 3p24.3   | 0.00311  | 0.951683 | 0.967038 |
| DNA2       | 10q21.3  | -0.00309 | 0.95193  | 0.96724  |
| FAM71C     | 12q23.1  | -0.00308 | 0.952145 | 0.967397 |
| DDX3Y      | Yq11.221 | -0.00308 | 0.952181 | 0.967397 |
| NEUROD2    | 17q12    | -0.00305 | 0.952645 | 0.967804 |
| CDHR2      | 5q35.2   | 0.003046 | 0.952679 | 0.967804 |
| KLRA1P     | 12p13.2  | -0.00303 | 0.952927 | 0.968008 |
| RBM3AP     | Yp11.2   | 0.00302  | 0.953089 | 0.968074 |
| OR8B8      | 11q24.2  | -0.00302 | 0.953089 | 0.968074 |

|            |          |          |          |          |
|------------|----------|----------|----------|----------|
| MMS19      | 10q24.1  | -0.00301 | 0.953263 | 0.968202 |
| ZBTB45     | 19q13.43 | -0.003   | 0.953403 | 0.968253 |
| OR8D1      | 11q24.2  | -0.003   | 0.95341  | 0.968253 |
| FIP1L1     | 4q12     | -0.00298 | 0.953694 | 0.968451 |
| LILRP2     | 19q13.42 | 0.00298  | 0.953702 | 0.968451 |
| EEF1DP3    | 13q13.1  | -0.00297 | 0.953907 | 0.96861  |
| SHH        | 7q36.3   | -0.00296 | 0.954093 | 0.96875  |
| FAM237A    | 2q33.3   | -0.00294 | 0.954251 | 0.968861 |
| HCRTR2     | 6p12.1   | 0.002938 | 0.954365 | 0.968927 |
| RPAP3      | 12q13.11 | 0.002933 | 0.954432 | 0.968947 |
| JMJD1C-AS1 | 10q21.3  | 0.002929 | 0.954492 | 0.968959 |
| PLAC9P1    | 2q21.1   | 0.002918 | 0.954672 | 0.969092 |
| CYP2A7     | 19q13.2  | 0.002914 | 0.954738 | 0.969109 |
| RGMB       | 5q15     | 0.002888 | 0.955127 | 0.969424 |
| OR2B3      | 6p22.1   | -0.00289 | 0.955146 | 0.969424 |
| TMEM209    | 7q32.2   | 0.002882 | 0.955234 | 0.969424 |
| EML5       | 14q31.3  | -0.00288 | 0.955241 | 0.969424 |
| OR2H1      | 6p22.1   | 0.002872 | 0.955376 | 0.969512 |
| PIWIL2     | 8p21.3   | -0.00287 | 0.955471 | 0.969559 |
| EMC4       | 15q14    | -0.00285 | 0.955779 | 0.969822 |
| VLDLR-AS1  | 9p24.2   | -0.00284 | 0.955866 | 0.969862 |
| TP53       | 17p13.1  | 0.002817 | 0.956236 | 0.970188 |
| SOX14      | 3q22.3   | -0.0028  | 0.956468 | 0.970374 |
| PLAAT1     | 3q29     | -0.00279 | 0.956594 | 0.970453 |
| NUCB1      | 19q13.33 | -0.00279 | 0.956687 | 0.970498 |
| TPTE2P1    | 13q12.13 | 0.002784 | 0.956749 | 0.970512 |
| RMDN2      | 2p22.2   | 0.00276  | 0.957122 | 0.970841 |
| FZD3       | 8p21.1   | 0.002744 | 0.957376 | 0.971035 |
| PARN       | 16p13.12 | -0.00274 | 0.957439 | 0.971035 |
| NPC2       | 14q24.3  | -0.00273 | 0.957509 | 0.971035 |
| BFAR       | 16p13.12 | -0.00273 | 0.957546 | 0.971035 |
| HNRNPH3    | 10q21.3  | 0.002729 | 0.957596 | 0.971035 |
| EPHB1      | 3q22.2   | 0.002726 | 0.957643 | 0.971035 |
| RNF6       | 13q12.13 | 0.002726 | 0.957653 | 0.971035 |
| XPO4       | 13q12.11 | 0.002717 | 0.957787 | 0.971122 |
| FRG2       | 4q35.2   | -0.0027  | 0.957992 | 0.971281 |
| RFWD3      | 16q23.1  | -0.00267 | 0.958452 | 0.971697 |
| ZBTB2      | 6q25.1   | -0.00267 | 0.958555 | 0.971704 |
| AFG1L      | 6q21     | -0.00267 | 0.958555 | 0.971704 |
| PSMG2      | 18p11.21 | 0.002661 | 0.958662 | 0.971763 |
| TMEM158    | 3p21.31  | 0.002636 | 0.959043 | 0.9721   |
| CST1       | 20p11.21 | -0.00263 | 0.959123 | 0.972132 |
| USH2A      | 1q41     | -0.00262 | 0.959257 | 0.972219 |
| HSFY2      | Yq11.222 | 0.00259  | 0.959766 | 0.972685 |
| FLJ36000   | 17p11.2  | -0.00259 | 0.959829 | 0.9727   |
| NAA15      | 4q31.1   | -0.00257 | 0.959996 | 0.972804 |
| FAM184A    | 6q22.31  | -0.00257 | 0.960029 | 0.972804 |
| KRTAP4-3   | 17q21.2  | -0.00256 | 0.960299 | 0.973029 |
| SLC9A3R2   | 16p13.3  | -0.00254 | 0.96058  | 0.973264 |
| SEMA6A     | 5q23.1   | -0.00252 | 0.960808 | 0.973445 |
| A1CF       | 10q11.23 | 0.002513 | 0.960958 | 0.973548 |
| NQO1       | 16q22.1  | -0.0025  | 0.961102 | 0.973645 |
| TFPI       | 2q32.1   | 0.00249  | 0.961309 | 0.973806 |
| ANKDD1A    | 15q22.31 | 0.002484 | 0.961406 | 0.973854 |
| FOLR3      | 11q13.4  | 0.002474 | 0.961567 | 0.973969 |
| BSPRY      | 9q32     | -0.00247 | 0.961626 | 0.973979 |
| CFHR2      | 1q31.3   | 0.002465 | 0.961697 | 0.974001 |
| HSPB6      | 19q13.12 | -0.00246 | 0.96177  | 0.974026 |



|           |          |          |          |          |
|-----------|----------|----------|----------|----------|
| ZBED3-AS1 | 5q13.3   | 0.002446 | 0.962003 | 0.974165 |
| LGR6      | 1q32.1   | 0.002445 | 0.962004 | 0.974165 |
| PRRT1     | 6p21.32  | -0.00244 | 0.962124 | 0.974237 |
| ROBO3     | 11q24.2  | -0.00243 | 0.962193 | 0.974258 |
| SRR       | 17p13.3  | -0.00242 | 0.962322 | 0.974339 |
| GFOD2     | 16q22.1  | -0.00242 | 0.962445 | 0.974415 |
| POU2F3    | 11q23.3  | 0.002412 | 0.962522 | 0.974443 |
| CALCOCO1  | 12q13.13 | 0.002396 | 0.962776 | 0.974651 |
| MAGEF1    | 3q27.1   | 0.002372 | 0.963137 | 0.974967 |
| WDR3      | 1p12     | -0.00231 | 0.964083 | 0.975873 |
| ODF2L     | 1p22.3   | 0.002309 | 0.96413  | 0.975873 |
| INSL6     | 9p24.1   | 0.002301 | 0.964252 | 0.975947 |
| SNORA55   | 1p34.3   | -0.00228 | 0.964564 | 0.976214 |
| JAK3      | 19p13.11 | -0.00227 | 0.964789 | 0.976392 |
| NCF4      | 22q12.3  | -0.00222 | 0.965501 | 0.977063 |
| PRNP      | 20p13    | 0.002207 | 0.965708 | 0.977224 |
| GDPD1     | 17q22    | 0.002188 | 0.965994 | 0.977463 |
| BARHL1    | 9q34.13  | 0.002162 | 0.966402 | 0.977827 |
| ANKH      | 5p15.2   | 0.002159 | 0.966453 | 0.97783  |
| AKT1      | 14q32.33 | -0.00215 | 0.966554 | 0.977882 |
| DOK7      | 4p16.3   | 0.002146 | 0.966651 | 0.977888 |
| FABP7     | 6q22.31  | 0.002143 | 0.966697 | 0.977888 |
| EPS8L1    | 19q13.42 | 0.002141 | 0.966734 | 0.977888 |
| ZNF192P1  | 6p22.1   | -0.00214 | 0.966781 | 0.977888 |
| CCNB2     | 15q22.2  | 0.002136 | 0.966804 | 0.977888 |
| GSG1      | 12p13.1  | 0.002133 | 0.966861 | 0.977896 |
| ZC2HC1B   | 6q24.2   | 0.002122 | 0.967022 | 0.977963 |
| VCP       | 9p13.3   | -0.00212 | 0.967025 | 0.977963 |
| WDR78     | 1p31.3   | -0.0021  | 0.967339 | 0.978232 |
| XRN2      | 20p11.22 | 0.002096 | 0.967433 | 0.978277 |
| DEFB135   | 8p23.1   | -0.00209 | 0.967513 | 0.978301 |
| VWA5B2    | 3q27.1   | -0.00209 | 0.96758  | 0.978301 |
| TGIF1     | 18p11.31 | 0.002085 | 0.967603 | 0.978301 |
| ZNF788P   | 19p13.2  | 0.002076 | 0.967747 | 0.978387 |
| FRA10AC1  | 10q23.33 | 0.002071 | 0.967821 | 0.978387 |
| TBXT      | 6q27     | -0.00207 | 0.967835 | 0.978387 |
| SATB2-AS1 | 2q33.1   | -0.00206 | 0.96795  | 0.978454 |
| HSD3B7    | 16p11.2  | 0.002034 | 0.968396 | 0.978855 |
| PYGB      | 20p11.21 | -0.00202 | 0.968596 | 0.979009 |
| TAS2R31   | 12p13.2  | -0.00199 | 0.969038 | 0.979375 |
| CDRT15P1  | 17p12    | -0.00199 | 0.969056 | 0.979375 |
| TGS1      | 8q12.1   | 0.001973 | 0.969335 | 0.979607 |
| GNG3      | 11q12.3  | -0.00197 | 0.969401 | 0.979624 |
| ID2       | 2p25.1   | -0.00196 | 0.969569 | 0.979745 |
| CBFB      | 16q22.1  | 0.001935 | 0.969934 | 0.980025 |
| ADPRM     | 17p13.1  | 0.001934 | 0.969944 | 0.980025 |
| SEH1L     | 18p11.21 | -0.00193 | 0.970014 | 0.980044 |
| TSPAN7    | Xp11.4   | -0.00193 | 0.970061 | 0.980044 |
| GOLGA2P3Y | Yq11.23  | 0.001919 | 0.970186 | 0.980121 |
| C17ORF64  | 17q23.2  | -0.00191 | 0.970272 | 0.980141 |
| SSX7      | Xp11.22  | -0.00191 | 0.970365 | 0.980141 |
| SBDS      | 7q11.21  | -0.00191 | 0.970385 | 0.980141 |
| TMPRSS3   | 21q22.3  | -0.0019  | 0.970402 | 0.980141 |
| OR4D5     | 11q24.1  | 0.001899 | 0.970495 | 0.98015  |
| PTH2      | 19q13.33 | -0.00189 | 0.970561 | 0.98015  |
| GBX1      | 7q36.1   | 0.001893 | 0.970579 | 0.98015  |
| BRDTP1    | Xq21.33  | -0.00189 | 0.970606 | 0.98015  |
| MAP10     | 1q42.2   | 0.001855 | 0.971176 | 0.980662 |

|           |               |          |          |          |
|-----------|---------------|----------|----------|----------|
| RAP2C     | Xq26.2        | 0.001853 | 0.971211 | 0.980662 |
| NPAS2     | 2q11.2        | -0.00184 | 0.971365 | 0.980748 |
| OR5111    | 11p15.4       | 0.001841 | 0.971394 | 0.980748 |
| NUPR2     | 7p11.2        | -0.00184 | 0.971483 | 0.980788 |
| ZNF841    | 19q13.41      | 0.001826 | 0.971619 | 0.980875 |
| KRT13     | 17q21.2       | 0.00182  | 0.971714 | 0.980875 |
| CD8B      | 2p11.2        | -0.00182 | 0.971716 | 0.980875 |
| S100A7A   | 1q21.3        | -0.00179 | 0.972199 | 0.981313 |
| GHITM     | 10q23.1       | -0.00177 | 0.972562 | 0.981532 |
| KATNAL2   | 18q21.1       | 0.001763 | 0.972599 | 0.981532 |
| C2ORF27B  | 2q21.2        | 0.001762 | 0.972615 | 0.981532 |
| FBP1      | 9q22.32       | -0.00176 | 0.972616 | 0.981532 |
| KRT33A    | 17q21.2       | 0.001759 | 0.972661 | 0.981532 |
| DYDC1     | 10q23.1       | -0.00175 | 0.972731 | 0.981554 |
| CDKL3     | 5q31.1        | -0.00175 | 0.972873 | 0.981647 |
| IRF2BP2   | 1q42.3        | 0.001727 | 0.973158 | 0.981844 |
| IL21      | 4q27          | -0.00173 | 0.97318  | 0.981844 |
| USP50     | 15q21.2       | -0.00172 | 0.973216 | 0.981844 |
| MGC2889   | 3q29          | -0.00171 | 0.973355 | 0.981935 |
| GPX6      | 6p22.1        | -0.0017  | 0.973625 | 0.982158 |
| ZNF432    | 19q13.41      | -0.00169 | 0.973703 | 0.982181 |
| ZNF214    | 11p15.4       | 0.001689 | 0.973746 | 0.982181 |
| TTC16     | 9q34.11       | 0.001678 | 0.97392  | 0.982307 |
| FAM162B   | 6q22.1        | -0.00167 | 0.97403  | 0.982354 |
| LIG4      | 13q33.3       | -0.00167 | 0.974064 | 0.982354 |
| MBL1P     | 10q22.3       | 0.001665 | 0.974122 | 0.982362 |
| GPC4      | Xq26.2        | 0.001648 | 0.974385 | 0.982566 |
| KCNJ12    | 17p11.2       | -0.00165 | 0.974422 | 0.982566 |
| ESPL1     | 12q13.13      | 0.001642 | 0.974489 | 0.982584 |
| INTS9     | 8p21.1        | -0.00164 | 0.974565 | 0.982612 |
| R3HDM2    | 12q13.3       | 0.001631 | 0.974646 | 0.982644 |
| OR2M4     | 1q44          | -0.00162 | 0.974788 | 0.982717 |
| CTAG2     | Xq28          | -0.00162 | 0.974885 | 0.982717 |
| KDM4E     | 11q21         | -0.00161 | 0.974908 | 0.982717 |
| TMEM247   | 2p21          | -0.00161 | 0.974915 | 0.982717 |
| PRO0611   | 1p35.2        | 0.001605 | 0.975062 | 0.982775 |
| ZNF716    | 7p11.2        | 0.001601 | 0.975122 | 0.982775 |
| PRG3      | 11q12.1       | 0.0016   | 0.975129 | 0.982775 |
| ACTRT1    | Xq25          | 0.001595 | 0.975209 | 0.982775 |
| EPB41     | 1p35.3        | -0.00159 | 0.975218 | 0.982775 |
| TAC3      | 12q13.3       | -0.00158 | 0.975453 | 0.982963 |
| SERAC1    | 6q25.3        | 0.00157  | 0.975602 | 0.983063 |
| KCNC2     | 12q21.1       | -0.00157 | 0.975657 | 0.983069 |
| F11       | 4q35.2        | -0.00156 | 0.975739 | 0.983102 |
| OR10S1    | 11q24.1       | -0.00154 | 0.976015 | 0.983331 |
| STATH     | 4q13.3        | 0.001526 | 0.976284 | 0.983553 |
| RHOC      | 1p13.2        | -0.00152 | 0.976348 | 0.983568 |
| ZNF700    | 19p13.2       | -0.00151 | 0.976586 | 0.983757 |
| LCE1F     | 1q21.3        | -0.0015  | 0.976736 | 0.983859 |
| TFAP2B    | 6p12.3        | 0.001476 | 0.977056 | 0.984133 |
| SHROOM4   | Xp11.22       | -0.00147 | 0.977171 | 0.984198 |
| ACOT11    | 1p32.3        | 0.001442 | 0.977582 | 0.984537 |
| CCL3      | 17q12         | -0.00144 | 0.977606 | 0.984537 |
| ANKRA2    | 5q13.2        | 0.001436 | 0.977676 | 0.984559 |
| DAOA      | 13q33.2 13q34 | 0.001429 | 0.977785 | 0.984618 |
| OR52B6    | 11p15.4       | 0.001389 | 0.978418 | 0.985207 |
| EXOC1L    | 4q12          | -0.00138 | 0.9785   | 0.98524  |
| ASAP1-IT1 | 8q24.21       | -0.00134 | 0.979129 | 0.985824 |

|             |        |                 |          |          |          |
|-------------|--------|-----------------|----------|----------|----------|
| SNORA25     |        | 11q21           | -0.00134 | 0.979219 | 0.985864 |
|             | 11-Mar | 5p15.1          | 0.001331 | 0.979321 | 0.985918 |
| ARG2        |        | 14q24.1         | 0.00131  | 0.979643 | 0.986192 |
| HLF         |        | 17q22           | -0.0013  | 0.979847 | 0.986348 |
| C5ORF47     |        | 5q35.2          | -0.00129 | 0.979904 | 0.986356 |
| SVOPL       |        | 7q34            | -0.00128 | 0.980073 | 0.986477 |
| PLSCR2      |        | 3q24            | 0.001274 | 0.980198 | 0.986553 |
| SMARCA4     |        | 19p13.2         | 0.001271 | 0.980248 | 0.986554 |
| CDH7        |        | 18q22.1         | -0.00126 | 0.980484 | 0.986742 |
| SGO2        |        | 2q33.1          | 0.001245 | 0.980653 | 0.986862 |
| TIGD2       |        | 4q22.1          | 0.001241 | 0.980713 | 0.986873 |
| TREH        |        | 11q23.3         | -0.00123 | 0.9809   | 0.987008 |
| DNASE1L1    |        | Xq28            | 0.001222 | 0.981008 | 0.987008 |
| OXA1L       |        | 14q11.2         | -0.00122 | 0.981038 | 0.987008 |
| FEZF1       |        | 7q31.32         | 0.00122  | 0.981045 | 0.987008 |
| ANXA4       |        | 2p13.3          | 0.001212 | 0.981158 | 0.987073 |
| COX5A       |        | 15q24.2         | -0.00121 | 0.981262 | 0.987127 |
| NR1I2       |        | 3q13.33         | -0.0012  | 0.981379 | 0.987196 |
| OBSL1       |        | 2q35            | 0.001185 | 0.98159  | 0.987358 |
| BHLHE23     |        | 20q13.33        | 0.00114  | 0.982282 | 0.987979 |
| RNF34       |        | 12q24.31        | -0.00114 | 0.982306 | 0.987979 |
| CYP4F11     |        | 19p13.12        | -0.00111 | 0.982819 | 0.988446 |
| RNF227      |        | 17p13.1         | 0.00107  | 0.983369 | 0.988921 |
| LY86-AS1    |        | 6p25.1          | -0.00107 | 0.983391 | 0.988921 |
| NRSN2       |        | 20p13           | 0.001055 | 0.9836   | 0.989072 |
| PAGE5       |        | Xp11.21         | -0.00105 | 0.983639 | 0.989072 |
| KLRC1       |        | 12p13.2         | -0.00104 | 0.983785 | 0.989123 |
| CEACAM16    |        | 19q13.31-q13.32 | -0.00104 | 0.983789 | 0.989123 |
| GPATCH4     |        | 1q22-q23.1      | -0.00104 | 0.983891 | 0.989176 |
| CCDC136     |        | 7q32.1          | 0.000992 | 0.984584 | 0.989823 |
| C1ORF68     |        | 1q21.3          | -0.00098 | 0.984714 | 0.989904 |
| CRYBA2      |        | 2q35            | 0.000949 | 0.985257 | 0.9904   |
| GPSM1       |        | 9q34.3          | 0.000937 | 0.98544  | 0.990535 |
| BPIFB4      |        | 20q11.21        | -0.00093 | 0.985548 | 0.990571 |
| KRT36       |        | 17q21.2         | -0.00093 | 0.985598 | 0.990571 |
| LRATD1      |        | 2p24.3          | 0.000923 | 0.985651 | 0.990571 |
| BEND7       |        | 10p13           | -0.00092 | 0.985674 | 0.990571 |
| IGF2        |        | 11p15.5         | 0.000917 | 0.985745 | 0.990592 |
| MSH4        |        | 1p31.1          | 0.000904 | 0.985942 | 0.99072  |
| LYPD6       |        | 2q23.2          | 0.000899 | 0.986026 | 0.99072  |
| CEPT1       |        | 1p13.3          | -0.0009  | 0.986066 | 0.99072  |
| KRTAP4-12   |        | 17q21.2         | -0.0009  | 0.98607  | 0.99072  |
| CERS3       |        | 15q26.3         | 0.00089  | 0.986166 | 0.990767 |
| RPL21P44    |        | 4q12            | -0.00088 | 0.98631  | 0.990862 |
| MYBPH       |        | 1q32.1          | 0.000867 | 0.986529 | 0.991004 |
| UVRAG       |        | 11q13.5         | 0.000865 | 0.986551 | 0.991004 |
| ZNF232      |        | 17p13.2         | 0.00083  | 0.987106 | 0.991513 |
| IL9         |        | 5q31.1          | 0.000817 | 0.987307 | 0.991656 |
| LIM2        |        | 19q13.41        | 0.000813 | 0.987362 | 0.991656 |
| ST7L        |        | 1p13.2          | 0.000808 | 0.987441 | 0.991656 |
| VCPKMT      |        | 14q21.3         | -0.00081 | 0.987448 | 0.991656 |
| TMPRSS11BNL |        | 4q13.2          | 0.000796 | 0.987624 | 0.991784 |
| LINC00452   |        | 13q34           | -0.00079 | 0.987759 | 0.99186  |
| ZNF763      |        | 19p13.2         | -0.00079 | 0.987799 | 0.99186  |
| LOC93429    |        | 19q13.32        | 0.000764 | 0.988119 | 0.992131 |
| OR4N4       |        | 15q11.2         | -0.00076 | 0.988168 | 0.992132 |
| TYRO3       |        | 15q15.1         | -0.00074 | 0.988431 | 0.992272 |
| MGST3       |        | 1q24.1          | -0.00074 | 0.988468 | 0.992272 |

|              |               |          |          |          |
|--------------|---------------|----------|----------|----------|
| KRT19        | 17q21.2       | 0.000741 | 0.988481 | 0.992272 |
| MYOZ2        | 4q26          | 0.000739 | 0.98851  | 0.992272 |
| BRS3         | Xq26.3        | -0.00074 | 0.988572 | 0.992272 |
| C12ORF56     | 12q14.2       | -0.00073 | 0.988606 | 0.992272 |
| TKTL1        | Xq28          | -0.00073 | 0.988667 | 0.992284 |
| CYP2B7P      | 19q13.2       | -0.00072 | 0.988826 | 0.992351 |
| PXT1         | 6p21.31       | 0.000718 | 0.988833 | 0.992351 |
| PRG2         | 11q12.1       | -0.00071 | 0.98901  | 0.992471 |
| ZNF100       | 19p12         | -0.0007  | 0.98908  | 0.992471 |
| PSG1         | 19q13.2       | 0.000701 | 0.989101 | 0.992471 |
| OR5K4        | 3q11.2        | -0.0007  | 0.989168 | 0.992489 |
| AGRP         | 16q22.1       | 0.000691 | 0.989252 | 0.992492 |
| NFYC         | 1p34.2        | -0.00069 | 0.989271 | 0.992492 |
| PPM1H        | 12q14.1-q14.2 | -0.00068 | 0.989445 | 0.992601 |
| DACT2        | 6q27          | 0.000677 | 0.989478 | 0.992601 |
| FOXL2        | 3q22.3        | -0.00066 | 0.989709 | 0.992782 |
| RAET1E       | 6q25.1        | 0.00065  | 0.989892 | 0.992916 |
| MXRA7        | 17q25.1       | 0.000644 | 0.989987 | 0.992962 |
| NCMAP        | 1p36.11       | 0.000597 | 0.990716 | 0.993644 |
| HEATR9       | 17q12         | -0.00059 | 0.990811 | 0.993689 |
| MSANTD4      | 11q22.3       | 0.000585 | 0.99091  | 0.993739 |
| ANKRD1       | 10q23.31      | -0.00058 | 0.990993 | 0.993772 |
| IFNK         | 9p21.2        | -0.00057 | 0.991179 | 0.993909 |
| CCDC110      | 4q35.1        | 0.000515 | 0.991988 | 0.994627 |
| ARMH1        | 1p34.1        | 0.000515 | 0.991994 | 0.994627 |
| CYP2A6       | 19q13.2       | -0.00051 | 0.992059 | 0.994641 |
| CCDC121      | 2p23.3        | -0.0005  | 0.992302 | 0.994836 |
| REXO1L6P     | 8q21.2        | -0.00048 | 0.992532 | 0.995016 |
| GAGE2B       | Xp11.23       | -0.00048 | 0.992589 | 0.995024 |
| C9ORF50      | 9q34.11       | 0.000459 | 0.992859 | 0.995244 |
| RNF146       | 6q22.33       | 0.000438 | 0.993186 | 0.995522 |
| HOXB7        | 17q21.32      | 0.000405 | 0.993704 | 0.995974 |
| PMS2P9       | 7q11.23       | -0.0004  | 0.993736 | 0.995974 |
| DHX38        | 16q22.2       | 0.000353 | 0.994511 | 0.996701 |
| FBXO47       | 17q12 17q12   | 0.000323 | 0.994973 | 0.997064 |
| DUSP11       | 2p13.1        | -0.00032 | 0.994979 | 0.997064 |
| DLK2         | 6p21.1        | 0.00032  | 0.995023 | 0.997064 |
| CYTH2        | 19q13.33      | -0.00031 | 0.99525  | 0.997225 |
| POM121L10P   | 22q11.23      | -0.0003  | 0.995344 | 0.997225 |
| SIGLEC16     | 19q13.33      | 0.000296 | 0.995404 | 0.997225 |
| OR13D1       | 9q31.1        | 0.000295 | 0.995414 | 0.997225 |
| SEC14L3      | 22q12.2       | 0.000294 | 0.995432 | 0.997225 |
| SCOC         | 4q31.1        | 0.000284 | 0.995592 | 0.997335 |
| SNX10        | 7p15.2        | -0.00027 | 0.995806 | 0.997499 |
| NSMAF        | 8q12.1        | 0.00026  | 0.99596  | 0.997512 |
| PSIP1        | 9p22.3        | -0.00026 | 0.996003 | 0.997512 |
| PRKCQ        | 10p15.1       | 0.000254 | 0.996053 | 0.997512 |
| DUXA         | 19q13.43      | -0.00025 | 0.996099 | 0.997512 |
| NT5DC3       | 12q23.3       | -0.00025 | 0.996174 | 0.997512 |
| SARDH        | 9q34.2        | 0.000245 | 0.99619  | 0.997512 |
| ATG7         | 3p25.3        | -0.00024 | 0.996217 | 0.997512 |
| ESPNL        | 2q37.3        | -0.00024 | 0.996217 | 0.997512 |
| PCCA         | 13q32.3       | 0.000221 | 0.996562 | 0.997807 |
| OOEP         | 6q13          | 0.000217 | 0.996628 | 0.997824 |
| HOXA5        | 7p15.2        | 0.000202 | 0.996856 | 0.998002 |
| TRIM62       | 1p35.1        | -0.00018 | 0.997157 | 0.998254 |
| CFB          | 6p21.33       | 0.000155 | 0.997592 | 0.998633 |
| DKFZP434L192 | 7p11.2        | -0.00015 | 0.997635 | 0.998633 |

|         |          |          |          |          |
|---------|----------|----------|----------|----------|
| OR11A1  | 6p22.1   | 0.000145 | 0.997748 | 0.998695 |
| CCDC185 | 1q41     | -0.00014 | 0.997819 | 0.998715 |
| NEK5    | 13q14.3  | -0.00014 | 0.997867 | 0.998715 |
| SPTBN2  | 11q13.2  | -0.00013 | 0.997961 | 0.998758 |
| ABCD4   | 14q24.3  | 0.000124 | 0.998071 | 0.998809 |
| ARMC1   | 8q13.1   | -0.00012 | 0.998111 | 0.998809 |
| IFI6    | 1p35.3   | 0.000112 | 0.998262 | 0.998899 |
| UGT2A1  | 4q13.3   | -0.00011 | 0.998322 | 0.998899 |
| DNAAF3  | 19q13.42 | -0.00011 | 0.99835  | 0.998899 |
| ANKRD29 | 18q11.2  | 0.000101 | 0.998432 | 0.998931 |
| NAGK    | 2p13.3   | 8.04E-05 | 0.99875  | 0.999199 |
| PDE8B   | 5q13.3   | 6.87E-05 | 0.998933 | 0.999332 |
| LBX1    | 10q24.32 | #####    | 0.999061 | 0.999411 |
| PPP2CA  | 5q31.1   | 4.68E-05 | 0.999272 | 0.999565 |
| ECHDC1  | 6q22.33  | #####    | 0.999316 | 0.999565 |
| CNPY1   | 7q36.3   | 3.67E-05 | 0.99943  | 0.999586 |
| ARHGEF4 | 2q21.1   | 3.46E-05 | 0.999463 | 0.999586 |
| FXD3    | 19q13.12 | #####    | 0.999523 | 0.999586 |
| CCDC126 | 7p15.3   | 2.98E-05 | 0.999537 | 0.999586 |
| ZNF683  | 1p36.11  | 1.69E-05 | 0.999737 | 0.999737 |

**Part 4****Coexpression genes of IQGAP2 in Colorectal Adenocarcinoma**

| Correlated Gene | Cytoband       | Spearman | p-Value  | q-Value  |
|-----------------|----------------|----------|----------|----------|
| LIMA1           | 12q13.12       | 0.608758 | 4.20E-40 | 8.41E-36 |
| CLINT1          | 5q33.3         | 0.597375 | 2.58E-38 | 2.59E-34 |
| AGR2            | 7p21.1         | 0.587609 | 7.77E-37 | 5.19E-33 |
| CREB3L1         | 11p11.2        | 0.555043 | 3.00E-32 | 1.50E-28 |
| TMEM246         | 9q31.1         | 0.552063 | 7.43E-32 | 2.98E-28 |
| VWA3B           | 2q11.2         | 0.550746 | 1.11E-31 | 3.70E-28 |
| STYK1           | 12p13.2        | 0.549372 | 1.68E-31 | 4.80E-28 |
| ETNK2           | 1q32.1         | -0.54135 | 1.81E-30 | 4.54E-27 |
| ERN2            | 16p12.2        | 0.54008  | 2.63E-30 | 5.85E-27 |
| RASL10B         | 17q12          | -0.53407 | 1.49E-29 | 2.98E-26 |
| MLPH            | 2q37.3         | 0.530357 | 4.27E-29 | 7.78E-26 |
| SLC41A2         | 12q23.3        | 0.529389 | 5.61E-29 | 9.37E-26 |
| RNF125          | 18q12.1        | 0.524387 | 2.27E-28 | 3.49E-25 |
| REG4            | 1p12           | 0.522881 | 3.44E-28 | 4.91E-25 |
| UAP1            | 1q23.3         | 0.521528 | 4.98E-28 | 6.65E-25 |
| CASP7           | 10q25.3        | 0.520352 | 6.87E-28 | 8.43E-25 |
| MYL6B           | 12q13.2        | -0.5201  | 7.36E-28 | 8.43E-25 |
| PTK7            | 6p21.1         | -0.51999 | 7.58E-28 | 8.43E-25 |
| MUC2            | 11p15.5        | 0.51892  | 1.02E-27 | 1.07E-24 |
| AHCYL2          | 7q32.1         | 0.51567  | 2.44E-27 | 2.45E-24 |
| RAB27B          | 18q21.2        | 0.515296 | 2.70E-27 | 2.58E-24 |
| CAMK2D          | 4q26           | 0.514986 | 2.94E-27 | 2.67E-24 |
| TSPAN1          | 1p34.1         | 0.512305 | 6.01E-27 | 5.23E-24 |
| AGR3            | 7p21.1         | 0.510969 | 8.56E-27 | 7.15E-24 |
| LDLRAD3         | 11p13          | -0.51033 | 1.01E-26 | 8.10E-24 |
| FFAR4           | 10q23.33       | 0.510195 | 1.05E-26 | 8.10E-24 |
| SLC17A5         | 6q13           | 0.508292 | 1.73E-26 | 1.29E-23 |
| LARGE2          | 11p11.2        | -0.50796 | 1.89E-26 | 1.35E-23 |
| NKD1            | 16q12.1        | -0.50475 | 4.37E-26 | 3.01E-23 |
| CTSE            | 1q32.1         | 0.504487 | 4.68E-26 | 3.12E-23 |
| CHST5           | 16q23.1        | 0.502951 | 6.95E-26 | 4.49E-23 |
| LGR4            | 11p14.1        | 0.501357 | 1.05E-25 | 6.56E-23 |
| ASCL2           | 11p15.5        | -0.50112 | 1.11E-25 | 6.76E-23 |
| MCU             | 10q22.1        | 0.497924 | 2.51E-25 | 1.48E-22 |
| RBM47           | 4p14           | 0.494348 | 6.19E-25 | 3.54E-22 |
| SGMS2           | 4q25           | 0.493118 | 8.42E-25 | 4.69E-22 |
| ST6GALNAC1      | 17q25.1        | 0.492312 | 1.03E-24 | 5.57E-22 |
| HIKESHI         | 11q14.2        | -0.49169 | 1.20E-24 | 6.34E-22 |
| SIAE            | 11q24.2        | 0.489155 | 2.25E-24 | 1.16E-21 |
| SLC44A4         | 6p21.33        | 0.488325 | 2.76E-24 | 1.38E-21 |
| SLC22A23        | 6p25.2         | 0.48761  | 3.29E-24 | 1.61E-21 |
| CD55            | 1q32.2         | 0.487229 | 3.61E-24 | 1.72E-21 |
| LARP6           | 15q23          | -0.48704 | 3.78E-24 | 1.76E-21 |
| PAPSS2          | 10q23.2-q23.31 | 0.486385 | 4.44E-24 | 2.02E-21 |
| AKR1B10         | 7q33           | 0.485881 | 5.02E-24 | 2.23E-21 |
| INPP1           | 2q32.2         | 0.484223 | 7.51E-24 | 3.27E-21 |
| C4ORF19         | 4p14           | 0.48385  | 8.22E-24 | 3.50E-21 |
| NR3C2           | 4q31.23        | 0.481816 | 1.34E-23 | 5.60E-21 |
| PTPRH           | 19q13.42       | 0.480069 | 2.04E-23 | 8.35E-21 |
| TC2N            | 14q32.12       | 0.479102 | 2.57E-23 | 1.03E-20 |
| FCGBP           | 19q13.2        | 0.478981 | 2.65E-23 | 1.04E-20 |
| KCNK1           | 1q42.2         | 0.478621 | 2.88E-23 | 1.11E-20 |
| MRAP2           | 6q14.2         | 0.476324 | 4.97E-23 | 1.88E-20 |
| SHROOM3         | 4q21.1         | 0.476083 | 5.26E-23 | 1.95E-20 |
| DRD2            | 11q23.2        | -0.47549 | 6.05E-23 | 2.20E-20 |

|           |                 |          |          |          |
|-----------|-----------------|----------|----------|----------|
| TPD52L2   | 20q13.33        | -0.47543 | 6.14E-23 | 2.20E-20 |
| FGD4      | 12p11.21        | 0.4748   | 7.12E-23 | 2.50E-20 |
| SPDEF     | 6p21.31         | 0.474509 | 7.62E-23 | 2.63E-20 |
| LSP1P4    | 2p11.2          | -0.473   | 1.08E-22 | 3.66E-20 |
| ZBTB7C    | 18q21.1         | 0.472951 | 1.10E-22 | 3.66E-20 |
| CAPN5     | 11q13.5         | 0.470273 | 2.05E-22 | 6.67E-20 |
| CYSTM1    | 5q31.3          | 0.470231 | 2.07E-22 | 6.67E-20 |
| NKD2      | 5p15.33         | -0.46929 | 2.57E-22 | 8.17E-20 |
| POFUT1    | 20q11.21        | -0.4676  | 3.79E-22 | 1.19E-19 |
| NELFCD    | 20q13.32        | -0.46754 | 3.85E-22 | 1.19E-19 |
| VILL      | 3p22.2          | 0.467254 | 4.10E-22 | 1.24E-19 |
| APCDD1    | 18p11.22        | -0.46716 | 4.19E-22 | 1.25E-19 |
| C4BPB     | 1q32.1          | 0.465655 | 5.91E-22 | 1.74E-19 |
| SCIN      | 7p21.3          | 0.46506  | 6.77E-22 | 1.95E-19 |
| STIM2     | 4p15.2          | 0.465031 | 6.82E-22 | 1.95E-19 |
| MUC4      | 3q29            | 0.464365 | 7.93E-22 | 2.24E-19 |
| MAP3K5    | 6q23.3          | 0.463513 | 9.62E-22 | 2.68E-19 |
| RAE1      | 20q13.31        | -0.46249 | 1.21E-21 | 3.33E-19 |
| SPINDOC   | 11q13.1         | -0.46083 | 1.76E-21 | 4.77E-19 |
| ACBD5     | 10p12.1         | 0.460343 | 1.97E-21 | 5.25E-19 |
| DLX3      | 17q21.33        | -0.46015 | 2.05E-21 | 5.41E-19 |
| F2RL1     | 5q13.3          | 0.45956  | 2.34E-21 | 6.09E-19 |
| CYP2W1    | 7p22.3          | -0.45904 | 2.63E-21 | 6.74E-19 |
| SLC9A1    | 1p36.11         | 0.458993 | 2.66E-21 | 6.74E-19 |
| ADAMTSL2  | 9q34.2          | -0.45833 | 3.08E-21 | 7.72E-19 |
| C2ORF72   | 2q37.1          | 0.45773  | 3.52E-21 | 8.62E-19 |
| MS4A8     | 11q12.2         | 0.457676 | 3.56E-21 | 8.62E-19 |
| GSKIP     | 14q32.2         | 0.457666 | 3.57E-21 | 8.62E-19 |
| FER1L6    | 8q24.13         | 0.456772 | 4.35E-21 | 1.04E-18 |
| C2ORF88   | 2q32.2          | 0.455372 | 5.93E-21 | 1.40E-18 |
| NODAL     | 10q22.1         | -0.45375 | 8.47E-21 | 1.97E-18 |
| BLNK      | 10q24.1         | 0.453039 | 9.90E-21 | 2.28E-18 |
| LY6G6D    | 6p21.33         | -0.45278 | 1.05E-20 | 2.38E-18 |
| MMP28     | 17q12           | 0.452351 | 1.15E-20 | 2.59E-18 |
| SLC5A6    | 2p23.3          | -0.45174 | 1.32E-20 | 2.93E-18 |
| PDE4D     | 5q11.2-q12.1    | 0.451122 | 1.50E-20 | 3.31E-18 |
| TP53RK    | 20q13.12        | -0.44954 | 2.12E-20 | 4.61E-18 |
| LIPH      | 3q27.2          | 0.448986 | 2.39E-20 | 5.15E-18 |
| SMYD5     | 2p13.2          | -0.44858 | 2.61E-20 | 5.56E-18 |
| CERS5     | 12q13.12        | -0.44852 | 2.64E-20 | 5.57E-18 |
| PDRG1     | 20q11.21        | -0.44816 | 2.85E-20 | 5.92E-18 |
| DNMT3B    | 20q11.21        | -0.44814 | 2.87E-20 | 5.92E-18 |
| FCHO2     | 5q13.2          | 0.447972 | 2.97E-20 | 6.07E-18 |
| F10       | 13q34           | -0.44664 | 3.96E-20 | 8.01E-18 |
| KLF4      | 9q31.2          | 0.445533 | 5.01E-20 | 1.00E-17 |
| PHACTR3   | 20q13.32-q13.33 | -0.44549 | 5.06E-20 | 1.00E-17 |
| ATP8A1    | 4p13            | 0.44541  | 5.15E-20 | 1.01E-17 |
| ATP8B1    | 18q21.31        | 0.444751 | 5.92E-20 | 1.15E-17 |
| SIDT1     | 3q13.2          | 0.44433  | 6.48E-20 | 1.25E-17 |
| ALDH1L1   | 3q21.3          | 0.443288 | 8.08E-20 | 1.54E-17 |
| ABHD3     | 18q11.2         | 0.442366 | 9.82E-20 | 1.86E-17 |
| ANG       | 14q11.2         | 0.441082 | 1.29E-19 | 2.39E-17 |
| MEX3A     | 1q22            | -0.44108 | 1.29E-19 | 2.39E-17 |
| ETHE1     | 19q13.31        | 0.440555 | 1.44E-19 | 2.64E-17 |
| SEC24A    | 5q31.1          | 0.440325 | 1.51E-19 | 2.75E-17 |
| TNFRSF11A | 18q21.33        | 0.439062 | 1.97E-19 | 3.55E-17 |
| CCDC68    | 18q21.2         | 0.43902  | 1.98E-19 | 3.55E-17 |
| WNT11     | 11q13.5         | -0.43883 | 2.06E-19 | 3.66E-17 |

|          |               |          |          |          |
|----------|---------------|----------|----------|----------|
| ZSWIM3   | 20q13.12      | -0.43805 | 2.43E-19 | 4.26E-17 |
| IFT46    | 11q23.3       | -0.43791 | 2.50E-19 | 4.35E-17 |
| GCNT3    | 15q22.2       | 0.437712 | 2.60E-19 | 4.50E-17 |
| CHP1     | 15q15.1       | 0.436636 | 3.26E-19 | 5.57E-17 |
| COMMD7   | 20q11.21      | -0.4365  | 3.35E-19 | 5.68E-17 |
| FAM177B  | 1q41          | 0.436073 | 3.66E-19 | 6.16E-17 |
| SLC37A1  | 21q22.3       | 0.434936 | 4.63E-19 | 7.72E-17 |
| PLAC8    | 4q21.22       | 0.434559 | 5.00E-19 | 8.28E-17 |
| VSTM5    | 11q21         | 0.434511 | 5.05E-19 | 8.29E-17 |
| PAAF1    | 11q13.4       | -0.43414 | 5.45E-19 | 8.87E-17 |
| CA12     | 15q22.2       | 0.433664 | 6.01E-19 | 9.65E-17 |
| MOB3B    | 9p21.2        | 0.433653 | 6.02E-19 | 9.65E-17 |
| DDX27    | 20q13.13      | -0.43352 | 6.19E-19 | 9.85E-17 |
| AAR2     | 20q11.23      | -0.43309 | 6.76E-19 | 1.07E-16 |
| SEMG1    | 20q13.12      | 0.433049 | 6.82E-19 | 1.07E-16 |
| CTNBNB1  | 20q11.23      | -0.43289 | 7.05E-19 | 1.09E-16 |
| PRSS23   | 11q14.2       | -0.4328  | 7.18E-19 | 1.11E-16 |
| SCT      | 11p15.5       | -0.43262 | 7.45E-19 | 1.13E-16 |
| NCOA5    | 20q13.12      | -0.43262 | 7.45E-19 | 1.13E-16 |
| EDEM3    | 1q25.3        | 0.4324   | 7.79E-19 | 1.17E-16 |
| PIGU     | 20q11.22      | -0.43212 | 8.25E-19 | 1.23E-16 |
| ZSWIM1   | 20q13.12      | -0.43203 | 8.41E-19 | 1.25E-16 |
| SDHA     | 5p15.33       | 0.431844 | 8.72E-19 | 1.28E-16 |
| CEL      | 9q34.13       | -0.43168 | 9.02E-19 | 1.32E-16 |
| MIA3     | 1q41          | 0.431529 | 9.30E-19 | 1.34E-16 |
| GNE      | 9p13.3        | 0.431514 | 9.33E-19 | 1.34E-16 |
| SNHG11   | 20q11.23      | -0.43063 | 1.12E-18 | 1.59E-16 |
| CAB39L   | 13q14.2       | -0.43061 | 1.12E-18 | 1.59E-16 |
| GNAQ     | 9q21.2        | 0.430383 | 1.17E-18 | 1.66E-16 |
| TMEM150A | 2p11.2        | -0.43032 | 1.19E-18 | 1.66E-16 |
| ACTR5    | 20q11.23      | -0.42999 | 1.27E-18 | 1.77E-16 |
| ETFDH    | 4q32.1        | 0.429872 | 1.30E-18 | 1.80E-16 |
| GDPD5    | 11q13.4-q13.5 | -0.42983 | 1.31E-18 | 1.80E-16 |
| PDXDC1   | 16p13.11      | 0.429364 | 1.44E-18 | 1.96E-16 |
| GPR143   | Xp22.2        | -0.42934 | 1.45E-18 | 1.96E-16 |
| SDR16C5  | 8q12.1        | 0.428948 | 1.57E-18 | 2.11E-16 |
| PFDN4    | 20q13.2       | -0.42881 | 1.61E-18 | 2.16E-16 |
| MAB21L4  | 2q37.3        | -0.4286  | 1.68E-18 | 2.23E-16 |
| TSPAN13  | 7p21.1        | 0.428547 | 1.70E-18 | 2.24E-16 |
| PMEP1    | 20q13.31      | -0.42809 | 1.87E-18 | 2.44E-16 |
| TFF1     | 21q22.3       | 0.427974 | 1.91E-18 | 2.49E-16 |
| SLC2A13  | 12q12         | 0.427806 | 1.98E-18 | 2.55E-16 |
| ATP2A3   | 17p13.2       | 0.427412 | 2.14E-18 | 2.75E-16 |
| SLC35A3  | 1p21.2        | 0.427203 | 2.23E-18 | 2.85E-16 |
| CA2      | 8q21.2        | 0.426993 | 2.33E-18 | 2.95E-16 |
| ATIC     | 2q35          | -0.42682 | 2.41E-18 | 3.04E-16 |
| METTL6   | 3p25.1        | -0.42674 | 2.45E-18 | 3.07E-16 |
| PLAGL2   | 20q11.21      | -0.42614 | 2.76E-18 | 3.44E-16 |
| TRIM7    | 5q35.3        | 0.425848 | 2.93E-18 | 3.62E-16 |
| PIGR     | 1q32.1        | 0.425779 | 2.97E-18 | 3.65E-16 |
| LPCAT4   | 15q14         | 0.424733 | 3.66E-18 | 4.47E-16 |
| ERGIC3   | 20q11.22      | -0.42435 | 3.95E-18 | 4.79E-16 |
| SLC2A12  | 6q23.2        | -0.42423 | 4.05E-18 | 4.88E-16 |
| KIAA1211 | 4q12          | 0.423853 | 4.36E-18 | 5.22E-16 |
| BCAS1    | 20q13.2       | 0.423698 | 4.49E-18 | 5.36E-16 |
| C10ORF82 | 10q25.3       | -0.42357 | 4.61E-18 | 5.46E-16 |
| TRIM40   | 6p22.1        | 0.423437 | 4.73E-18 | 5.58E-16 |
| TSNARE1  | 8q24.3        | -0.4231  | 5.06E-18 | 5.93E-16 |



|          |          |          |          |          |
|----------|----------|----------|----------|----------|
| TOMM34   | 20q13.12 | -0.42278 | 5.39E-18 | 6.27E-16 |
| PLLP     | 16q13    | 0.422687 | 5.49E-18 | 6.36E-16 |
| NOTUM    | 17q25.3  | -0.42248 | 5.73E-18 | 6.59E-16 |
| TMEM92   | 17q21.33 | 0.422359 | 5.86E-18 | 6.70E-16 |
| TTPAL    | 20q13.12 | -0.42193 | 6.38E-18 | 7.24E-16 |
| SEMA4G   | 10q24.31 | 0.42191  | 6.40E-18 | 7.24E-16 |
| CAST     | 5q15     | 0.421491 | 6.95E-18 | 7.82E-16 |
| ASXL1    | 20q11.21 | -0.42125 | 7.29E-18 | 8.13E-16 |
| ANXA10   | 4q32.3   | 0.421241 | 7.30E-18 | 8.13E-16 |
| CEBPB    | 20q13.13 | -0.42092 | 7.79E-18 | 8.58E-16 |
| PCMTD2   | 20q13.33 | -0.42091 | 7.79E-18 | 8.58E-16 |
| SLC1A1   | 9p24.2   | 0.420499 | 8.45E-18 | 9.25E-16 |
| FAS      | 10q23.31 | 0.420221 | 8.93E-18 | 9.71E-16 |
| TJP3     | 19p13.3  | 0.420005 | 9.31E-18 | 1.01E-15 |
| HPSE     | 4q21.23  | 0.418566 | 1.23E-17 | 1.33E-15 |
| PANK3    | 5q34     | 0.418298 | 1.30E-17 | 1.39E-15 |
| PLCL2    | 3p24.3   | 0.418087 | 1.35E-17 | 1.44E-15 |
| CATSPERB | 14q32.12 | 0.41789  | 1.41E-17 | 1.49E-15 |
| MOCS3    | 20q13.13 | -0.41781 | 1.43E-17 | 1.50E-15 |
| IBTK     | 6q14.1   | 0.417795 | 1.43E-17 | 1.50E-15 |
| DGKA     | 12q13.2  | 0.417443 | 1.54E-17 | 1.60E-15 |
| RALY     | 20q11.22 | -0.41675 | 1.76E-17 | 1.82E-15 |
| SPATA18  | 4q12     | 0.416555 | 1.82E-17 | 1.88E-15 |
| AKIRIN2  | 6q15     | -0.41626 | 1.93E-17 | 1.98E-15 |
| GID8     | 20q13.33 | -0.41606 | 2.01E-17 | 2.05E-15 |
| EIF2B4   | 2p23.3   | -0.41584 | 2.10E-17 | 2.13E-15 |
| BTNL8    | 5q35.3   | 0.414983 | 2.47E-17 | 2.50E-15 |
| PCIF1    | 20q13.12 | -0.41479 | 2.57E-17 | 2.57E-15 |
| B3GALT5  | 21q22.2  | 0.41478  | 2.57E-17 | 2.57E-15 |
| BCL11A   | 2p16.1   | -0.41451 | 2.71E-17 | 2.70E-15 |
| NCK2     | 2q12.2   | -0.41439 | 2.77E-17 | 2.75E-15 |
| TNFSF13  | 17p13.1  | 0.414192 | 2.88E-17 | 2.84E-15 |
| STRA6    | 15q24.1  | -0.41415 | 2.90E-17 | 2.85E-15 |
| ARX      | Xp21.3   | 0.414055 | 2.96E-17 | 2.89E-15 |
| FAM114A1 | 4p14     | 0.413832 | 3.09E-17 | 3.00E-15 |
| ERCC3    | 2q14.3   | -0.41369 | 3.17E-17 | 3.07E-15 |
| UQCC1    | 20q11.22 | -0.41367 | 3.18E-17 | 3.07E-15 |
| PTP4A3   | 8q24.3   | -0.41348 | 3.30E-17 | 3.17E-15 |
| SLC35C2  | 20q13.12 | -0.41331 | 3.41E-17 | 3.25E-15 |
| ROMO1    | 20q11.22 | -0.4131  | 3.55E-17 | 3.37E-15 |
| UGT8     | 4q26     | 0.412755 | 3.79E-17 | 3.57E-15 |
| AGBL4    | 1p33     | 0.412752 | 3.80E-17 | 3.57E-15 |
| LRP10    | 14q11.2  | 0.412272 | 4.16E-17 | 3.89E-15 |
| LHFPL2   | 5q14.1   | 0.412215 | 4.21E-17 | 3.92E-15 |
| FGFR2    | 10q26.13 | 0.411972 | 4.41E-17 | 4.09E-15 |
| GGT7     | 20q11.22 | -0.41188 | 4.48E-17 | 4.14E-15 |
| PLAG1    | 8q12.1   | -0.41172 | 4.62E-17 | 4.24E-15 |
| ALDH6A1  | 14q24.3  | 0.411578 | 4.75E-17 | 4.34E-15 |
| SUSD3    | 9q22.31  | -0.41143 | 4.88E-17 | 4.44E-15 |
| ZNF503   | 10q22.2  | -0.41107 | 5.24E-17 | 4.75E-15 |
| ZFYVE28  | 4p16.3   | 0.410932 | 5.37E-17 | 4.85E-15 |
| KIAA1522 | 1p35.1   | 0.410704 | 5.61E-17 | 5.04E-15 |
| ACBD3    | 1q42.12  | 0.410628 | 5.69E-17 | 5.09E-15 |
| EREG     | 4q13.3   | -0.40984 | 6.61E-17 | 5.89E-15 |
| TLN2     | 15q22.2  | 0.409678 | 6.82E-17 | 6.04E-15 |
| TENT5A   | 6q14.1   | 0.408677 | 8.24E-17 | 7.27E-15 |
| PABPC1L  | 20q13.12 | -0.40819 | 9.03E-17 | 7.93E-15 |
| KIAA0513 | 16q24.1  | 0.408137 | 9.12E-17 | 7.98E-15 |

|           |               |          |          |          |
|-----------|---------------|----------|----------|----------|
| CANT1     | 17q25.3       | 0.407838 | 9.65E-17 | 8.40E-15 |
| ZSCAN21   | 7q22.1        | -0.40752 | 1.02E-16 | 8.88E-15 |
| EVA1A     | 2p12          | -0.40749 | 1.03E-16 | 8.88E-15 |
| LSP1P5    | 1q21.1        | -0.40747 | 1.03E-16 | 8.88E-15 |
| ERGIC1    | 5q35.1        | 0.407234 | 1.08E-16 | 9.25E-15 |
| GNAS      | 20q13.32      | -0.40615 | 1.32E-16 | 1.13E-14 |
| SMTNL2    | 17p13.2       | -0.40611 | 1.34E-16 | 1.13E-14 |
| QPRT      | 16p11.2       | -0.40595 | 1.37E-16 | 1.16E-14 |
| CMBL      | 5p15.2        | 0.405864 | 1.40E-16 | 1.18E-14 |
| LRRC66    | 4q12          | 0.405382 | 1.53E-16 | 1.28E-14 |
| CHRNA7    | 15q13.3       | 0.405266 | 1.56E-16 | 1.30E-14 |
| KIF3C     | 2p23.3        | -0.40509 | 1.62E-16 | 1.34E-14 |
| GOLM1     | 9q21.33       | 0.404862 | 1.68E-16 | 1.39E-14 |
| LDHD      | 16q23.1       | 0.404606 | 1.77E-16 | 1.46E-14 |
| WDR35     | 2p24.1        | -0.40414 | 1.93E-16 | 1.58E-14 |
| SESN1     | 6q21          | -0.40363 | 2.12E-16 | 1.73E-14 |
| RTKN      | 2p13.1        | -0.40329 | 2.26E-16 | 1.84E-14 |
| ASPHD2    | 22q12.1       | 0.40312  | 2.33E-16 | 1.89E-14 |
| MAP3K20   | 2q31.1        | -0.40309 | 2.34E-16 | 1.89E-14 |
| ZNRF3     | 22q12.1       | -0.40276 | 2.49E-16 | 2.00E-14 |
| ABLIM1    | 10q25.3       | 0.402085 | 2.82E-16 | 2.26E-14 |
| CAMKV     | 3p21.31       | -0.40175 | 3.00E-16 | 2.39E-14 |
| TH        | 11p15.5       | -0.40114 | 3.36E-16 | 2.67E-14 |
| DNM2      | 19p13.2       | 0.400939 | 3.48E-16 | 2.76E-14 |
| CHRFAM7A  | 15q13.2       | 0.400824 | 3.56E-16 | 2.81E-14 |
| SSB       | 2q31.1        | -0.40047 | 3.80E-16 | 2.97E-14 |
| KRT23     | 17q21.2       | -0.40046 | 3.80E-16 | 2.97E-14 |
| SLC22A11  | 11q13.1       | -0.40044 | 3.82E-16 | 2.97E-14 |
| FA2H      | 16q23.1       | 0.400183 | 4.00E-16 | 3.11E-14 |
| CPNE1     | 20q11.22      | -0.39998 | 4.15E-16 | 3.21E-14 |
| CYP2C18   | 10q23.33      | 0.399895 | 4.22E-16 | 3.25E-14 |
| C1ORF105  | 1q24.3        | -0.39986 | 4.24E-16 | 3.26E-14 |
| CELP      | 9q34.13       | -0.39962 | 4.44E-16 | 3.40E-14 |
| LINC00589 | 8p12          | 0.399555 | 4.49E-16 | 3.42E-14 |
| MPV17     | 2p23.3        | -0.39868 | 5.27E-16 | 4.00E-14 |
| TMEM61    | 1p32.3        | 0.398614 | 5.34E-16 | 4.03E-14 |
| RASSF10   | 11p15.3       | -0.3985  | 5.45E-16 | 4.10E-14 |
| SYS1      | 20q13.12      | -0.3984  | 5.54E-16 | 4.16E-14 |
| F7        | 13q34         | -0.39817 | 5.79E-16 | 4.33E-14 |
| CPN1      | 10q24.2       | -0.39785 | 6.14E-16 | 4.57E-14 |
| IL1R2     | 2q11.2        | 0.397622 | 6.39E-16 | 4.74E-14 |
| CES3      | 16q22.1       | 0.397582 | 6.44E-16 | 4.76E-14 |
| CIAO1     | 2q11.2        | -0.39715 | 6.96E-16 | 5.12E-14 |
| GRPR      | Xp22.2        | -0.39697 | 7.20E-16 | 5.28E-14 |
| GNG4      | 1q42.3        | -0.39692 | 7.26E-16 | 5.31E-14 |
| GALNT7    | 4q34.1        | 0.396096 | 8.43E-16 | 6.14E-14 |
| RBP1      | 3q23          | -0.39572 | 9.03E-16 | 6.55E-14 |
| DPM1      | 20q13.13      | -0.39567 | 9.10E-16 | 6.58E-14 |
| LINC01512 | 6p21.1        | -0.39545 | 9.48E-16 | 6.83E-14 |
| PITPNM3   | 17p13.2-p13.1 | 0.395402 | 9.56E-16 | 6.86E-14 |
| MUC1      | 1q22          | 0.395208 | 9.90E-16 | 7.08E-14 |
| FUNDC2    | Xq28          | -0.39436 | 1.15E-15 | 8.22E-14 |
| C1ORF226  | 1q23.3        | 0.393648 | 1.31E-15 | 9.28E-14 |
| BRSK2     | 11p15.5       | -0.39365 | 1.31E-15 | 9.28E-14 |
| HECTD3    | 1p34.1        | 0.39336  | 1.38E-15 | 9.73E-14 |
| DPEP1     | 16q24.3       | -0.39323 | 1.41E-15 | 9.93E-14 |
| C1ORF21   | 1q25.3        | 0.393188 | 1.42E-15 | 9.97E-14 |
| ATP5F1E   | 20q13.32      | -0.39308 | 1.45E-15 | 1.01E-13 |

|           |               |          |          |          |
|-----------|---------------|----------|----------|----------|
| C11ORF95  | 11q13.1       | -0.39306 | 1.46E-15 | 1.01E-13 |
| ELMO2     | 20q13.12      | -0.39236 | 1.65E-15 | 1.14E-13 |
| GET4      | 7p22.3        | -0.39185 | 1.81E-15 | 1.25E-13 |
| SEC24D    | 4q26          | 0.391762 | 1.84E-15 | 1.26E-13 |
| MFAP2     | 1p36.13       | -0.39158 | 1.90E-15 | 1.30E-13 |
| LINC02418 | 12q24.33      | -0.39125 | 2.01E-15 | 1.37E-13 |
| CDS1      | 4q21.23       | 0.391151 | 2.05E-15 | 1.39E-13 |
| IFT52     | 20q13.12      | -0.3907  | 2.22E-15 | 1.51E-13 |
| CLDN9     | 16p13.3       | -0.39049 | 2.30E-15 | 1.56E-13 |
| TM9SF3    | 10q24.1       | 0.390436 | 2.33E-15 | 1.57E-13 |
| CSE1L     | 20q13.13      | -0.39001 | 2.51E-15 | 1.69E-13 |
| ADNP      | 20q13.13      | -0.38987 | 2.57E-15 | 1.72E-13 |
| CASC15    | 6p22.3        | -0.38983 | 2.59E-15 | 1.73E-13 |
| PRPF6     | 20q13.33      | -0.38967 | 2.66E-15 | 1.77E-13 |
| FANCF     | 11p14.3       | -0.38941 | 2.79E-15 | 1.85E-13 |
| DNTTIP1   | 20q13.12      | -0.3894  | 2.79E-15 | 1.85E-13 |
| FGF19     | 11q13.3       | -0.38909 | 2.95E-15 | 1.94E-13 |
| ARHGEF28  | 5q13.2        | 0.388624 | 3.20E-15 | 2.10E-13 |
| ZNF775    | 7q36.1        | -0.38861 | 3.21E-15 | 2.10E-13 |
| PRRC1     | 5q23.2        | 0.388532 | 3.26E-15 | 2.12E-13 |
| ZNF853    | 7p22.1        | -0.38763 | 3.81E-15 | 2.48E-13 |
| BAK1      | 6p21.31       | 0.387482 | 3.92E-15 | 2.54E-13 |
| MAP4K2    | 11q13.1       | -0.3874  | 3.97E-15 | 2.57E-13 |
| ARHGAP23  | 17q12         | -0.38716 | 4.14E-15 | 2.67E-13 |
| SMIM29    | 6p21.31       | -0.38644 | 4.71E-15 | 3.02E-13 |
| BACE2     | 21q22.2-q22.3 | 0.386104 | 4.99E-15 | 3.19E-13 |
| VPS53     | 17p13.3       | 0.385937 | 5.14E-15 | 3.28E-13 |
| TRPC4AP   | 20q11.22      | -0.38586 | 5.21E-15 | 3.31E-13 |
| FAM217B   | 20q13.33      | -0.38558 | 5.46E-15 | 3.46E-13 |
| MAPRE1    | 20q11.21      | -0.38557 | 5.48E-15 | 3.46E-13 |
| RNF182    | 6p23          | -0.38551 | 5.54E-15 | 3.49E-13 |
| FNIP2     | 4q32.1        | 0.385458 | 5.58E-15 | 3.51E-13 |
| ZNF517    | 8q24.3        | -0.38526 | 5.79E-15 | 3.62E-13 |
| UNC13B    | 9p13.3        | 0.384992 | 6.06E-15 | 3.77E-13 |
| DHRS9     | 2q31.1        | 0.384992 | 6.06E-15 | 3.77E-13 |
| RBMS1     | 2q24.2        | -0.3849  | 6.16E-15 | 3.82E-13 |
| SNHG17    | 20q11.23      | -0.38468 | 6.40E-15 | 3.96E-13 |
| LOC285074 | 2p11.2        | -0.38453 | 6.57E-15 | 4.05E-13 |
| NRXN3     | 14q24.3-q31.1 | -0.3843  | 6.83E-15 | 4.20E-13 |
| TGIF2     | 20q11.23      | -0.38365 | 7.66E-15 | 4.69E-13 |
| SGPP2     | 2q36.1        | 0.383159 | 8.33E-15 | 5.09E-13 |
| DTNB      | 2p23.3        | -0.38285 | 8.78E-15 | 5.35E-13 |
| KRBOX4    | Xp11.3        | -0.38268 | 9.05E-15 | 5.49E-13 |
| L1CAM     | Xq28          | -0.38261 | 9.16E-15 | 5.52E-13 |
| SLC3A2    | 11q12.3       | -0.38261 | 9.17E-15 | 5.52E-13 |
| PSMA7     | 20q13.33      | -0.3826  | 9.18E-15 | 5.52E-13 |
| C9ORF152  | 9q31.3        | 0.382569 | 9.22E-15 | 5.53E-13 |
| PXMP2     | 12q24.33      | 0.382544 | 9.26E-15 | 5.54E-13 |
| GPA33     | 1q24.1        | 0.382511 | 9.32E-15 | 5.55E-13 |
| TAS1R3    | 1p36.33       | -0.38249 | 9.35E-15 | 5.56E-13 |
| UCKL1     | 20q13.33      | -0.38247 | 9.38E-15 | 5.56E-13 |
| ADRM1     | 20q13.33      | -0.38234 | 9.60E-15 | 5.67E-13 |
| RTF2      | 20q13.31      | -0.38232 | 9.63E-15 | 5.67E-13 |
| SHROOM4   | Xp11.22       | -0.38219 | 9.85E-15 | 5.78E-13 |
| TOP1MT    | 8q24.3        | -0.38217 | 9.88E-15 | 5.79E-13 |
| AKR7A3    | 1p36.13       | 0.382154 | 9.91E-15 | 5.79E-13 |
| ARFGAP1   | 20q13.33      | -0.38207 | 1.01E-14 | 5.86E-13 |
| LYZ       | 12q15         | 0.381708 | 1.07E-14 | 6.21E-13 |

|               |                |          |          |          |
|---------------|----------------|----------|----------|----------|
| BARX2         | 11q24.3        | 0.381664 | 1.08E-14 | 6.24E-13 |
| CCZ1P-OR7E38P | 7q21.3         | -0.3815  | 1.11E-14 | 6.40E-13 |
| ZNF696        | 8q24.3         | -0.3813  | 1.15E-14 | 6.61E-13 |
| CNNM4         | 2q11.2         | 0.381046 | 1.20E-14 | 6.88E-13 |
| CARMIL1       | 6p22.2         | 0.380681 | 1.28E-14 | 7.31E-13 |
| TMTC2         | 12q21.31       | 0.380593 | 1.30E-14 | 7.40E-13 |
| ADGRG6        | 6q24.2         | 0.380564 | 1.30E-14 | 7.41E-13 |
| TFF2          | 21q22.3        | 0.380527 | 1.31E-14 | 7.44E-13 |
| XPNPEP1       | 10q25.1        | 0.380476 | 1.32E-14 | 7.48E-13 |
| AXIN2         | 17q24.1        | -0.38003 | 1.43E-14 | 8.06E-13 |
| PFKFB2        | 1q32.1         | 0.380001 | 1.43E-14 | 8.07E-13 |
| SLC38A3       | 3p21.31        | -0.37997 | 1.44E-14 | 8.09E-13 |
| BMP2          | 20p12.3        | 0.379825 | 1.48E-14 | 8.27E-13 |
| ATP2B1        | 12q21.33       | 0.379608 | 1.53E-14 | 8.56E-13 |
| AFG3L2        | 18p11.21       | 0.3795   | 1.56E-14 | 8.70E-13 |
| GNA11         | 19p13.3        | 0.379172 | 1.65E-14 | 9.17E-13 |
| SORBS1        | 10q24.1        | -0.37902 | 1.70E-14 | 9.39E-13 |
| LY6G6E        | 6p21.33        | -0.37877 | 1.77E-14 | 9.77E-13 |
| PNO1          | 2p14           | -0.37866 | 1.81E-14 | 9.93E-13 |
| NUDT16        | 3q22.1         | 0.377574 | 2.17E-14 | 1.19E-12 |
| VNN1          | 6q23.2         | 0.377535 | 2.19E-14 | 1.20E-12 |
| S100P         | 4p16.1         | 0.377521 | 2.19E-14 | 1.20E-12 |
| LOC728743     | 7q36.1         | -0.37737 | 2.25E-14 | 1.22E-12 |
| TMEM263       | 12q23.3        | 0.377066 | 2.37E-14 | 1.28E-12 |
| ATRAID        | 2p23.3         | -0.37693 | 2.42E-14 | 1.31E-12 |
| HSD17B2       | 16q23.3        | 0.376831 | 2.46E-14 | 1.33E-12 |
| POLR2D        | 2q14.3         | -0.3767  | 2.52E-14 | 1.35E-12 |
| PTGER2        | 14q22.1        | 0.376618 | 2.55E-14 | 1.37E-12 |
| SCP2          | 1p32.3         | 0.376529 | 2.59E-14 | 1.39E-12 |
| TTI1          | 20q11.23       | -0.37643 | 2.64E-14 | 1.41E-12 |
| DKC1          | Xq28           | -0.37621 | 2.74E-14 | 1.46E-12 |
| MICU1         | 10q22.1        | 0.376048 | 2.81E-14 | 1.49E-12 |
| WIF1          | 12q14.3        | -0.37594 | 2.86E-14 | 1.52E-12 |
| EIF4E3        | 3p13           | 0.375616 | 3.02E-14 | 1.59E-12 |
| GALNT8        | 12p13.32       | 0.375615 | 3.02E-14 | 1.59E-12 |
| CPEB3         | 10q23.32       | 0.375604 | 3.03E-14 | 1.59E-12 |
| SGSM3         | 22q13.1        | 0.375569 | 3.05E-14 | 1.60E-12 |
| SEC16A        | 9q34.3         | 0.375424 | 3.12E-14 | 1.63E-12 |
| GMDS          | 6p25.3         | 0.375408 | 3.13E-14 | 1.63E-12 |
| TCF7L2        | 10q25.2-q25.3  | 0.375392 | 3.14E-14 | 1.63E-12 |
| TMEM63B       | 6p21.1         | 0.375383 | 3.15E-14 | 1.63E-12 |
| NANS          | 9q22.33        | 0.375315 | 3.18E-14 | 1.65E-12 |
| ATP1B1        | 1q24.2         | 0.375082 | 3.31E-14 | 1.71E-12 |
| CES1          | 16q12.2        | -0.37498 | 3.37E-14 | 1.73E-12 |
| TIA1          | 2p13.3         | -0.37473 | 3.51E-14 | 1.80E-12 |
| RSPH1         | 21q22.3        | 0.374544 | 3.62E-14 | 1.86E-12 |
| PKP2          | 12p11.21       | 0.374359 | 3.74E-14 | 1.91E-12 |
| ARFGEF3       | 6q23.3-q24.1   | 0.37422  | 3.83E-14 | 1.95E-12 |
| R3HDML        | 20q13.12       | -0.37418 | 3.85E-14 | 1.96E-12 |
| SNX21         | 20q13.12       | -0.37398 | 3.99E-14 | 2.02E-12 |
| SUPT7L        | 2p23.3         | -0.37396 | 4.00E-14 | 2.02E-12 |
| SPINK4        | 9p13.3         | 0.37382  | 4.09E-14 | 2.06E-12 |
| ARHGEF19      | 1p36.13        | -0.37368 | 4.19E-14 | 2.11E-12 |
| JAK2          | 9p24.1         | 0.37366  | 4.20E-14 | 2.11E-12 |
| CSTF1         | 20q13.2-q13.31 | -0.3736  | 4.25E-14 | 2.13E-12 |
| DUSP4         | 8p12           | 0.373561 | 4.27E-14 | 2.13E-12 |
| TAOK3         | 12q24.23       | 0.373542 | 4.29E-14 | 2.14E-12 |
| EIF6          | 20q11.22       | -0.3731  | 4.62E-14 | 2.29E-12 |

|          |               |          |          |          |
|----------|---------------|----------|----------|----------|
| SPTLC2   | 14q24.3       | 0.373044 | 4.66E-14 | 2.31E-12 |
| OSER1    | 20q13.12      | -0.37296 | 4.72E-14 | 2.34E-12 |
| NPEPL1   | 20q13.32      | -0.37274 | 4.90E-14 | 2.42E-12 |
| GPAT3    | 4q21.23       | 0.372146 | 5.41E-14 | 2.66E-12 |
| ABI2     | 2q33.2        | -0.37189 | 5.65E-14 | 2.77E-12 |
| ITM2C    | 2q37.1        | 0.371765 | 5.77E-14 | 2.82E-12 |
| TTLL6    | 17q21.32      | 0.371611 | 5.92E-14 | 2.89E-12 |
| DARS     | 2q21.3        | -0.37154 | 5.99E-14 | 2.92E-12 |
| MOSPD1   | Xq26.3        | -0.37138 | 6.15E-14 | 2.99E-12 |
| MINK1    | 17p13.2       | 0.371271 | 6.26E-14 | 3.04E-12 |
| GFI1     | 1p22.1        | 0.371212 | 6.32E-14 | 3.06E-12 |
| RIOK3    | 18q11.2       | 0.371198 | 6.34E-14 | 3.06E-12 |
| YTHDF1   | 20q13.33      | -0.37093 | 6.63E-14 | 3.19E-12 |
| UTP14A   | Xq26.1        | -0.37079 | 6.78E-14 | 3.25E-12 |
| EPB41L5  | 2q14.2        | -0.37078 | 6.79E-14 | 3.25E-12 |
| NXPH3    | 17q21.33      | -0.37077 | 6.80E-14 | 3.25E-12 |
| NSMCE1   | 16p12.1       | -0.37057 | 7.04E-14 | 3.36E-12 |
| NRAP     | 10q25.3       | 0.370396 | 7.24E-14 | 3.44E-12 |
| DYNLRB1  | 20q11.22      | -0.37035 | 7.29E-14 | 3.46E-12 |
| SEMA3A   | 7q21.11       | -0.37032 | 7.33E-14 | 3.47E-12 |
| MRGBP    | 20q13.33      | -0.37017 | 7.52E-14 | 3.55E-12 |
| MYO1A    | 12q13.3       | 0.369943 | 7.80E-14 | 3.68E-12 |
| C6ORF15  | 6p21.33       | -0.36989 | 7.88E-14 | 3.70E-12 |
| COMMD5   | 8q24.3        | -0.3697  | 8.12E-14 | 3.81E-12 |
| WWOX     | 16q23.1-q23.2 | -0.36923 | 8.78E-14 | 4.11E-12 |
| SLC6A6   | 3p25.1        | -0.36915 | 8.89E-14 | 4.15E-12 |
| ORC3     | 6q15          | -0.36907 | 9.01E-14 | 4.20E-12 |
| SLC9A2   | 2q12.1        | 0.368672 | 9.63E-14 | 4.47E-12 |
| MCRIP1   | 17q25.3       | -0.3685  | 9.90E-14 | 4.59E-12 |
| RNF114   | 20q13.13      | -0.36835 | 1.02E-13 | 4.70E-12 |
| CDK5RAP1 | 20q11.21      | -0.36832 | 1.02E-13 | 4.71E-12 |
| KCNT1    | 9q34.3        | -0.36812 | 1.05E-13 | 4.85E-12 |
| RNASE4   | 14q11.2       | 0.368114 | 1.06E-13 | 4.85E-12 |
| STX16    | 20q13.32      | -0.36796 | 1.08E-13 | 4.96E-12 |
| RNF25    | 2q35          | -0.36786 | 1.10E-13 | 5.03E-12 |
| GALNT12  | 9q22.33       | 0.367781 | 1.11E-13 | 5.09E-12 |
| ZZEF1    | 17p13.2       | 0.367748 | 1.12E-13 | 5.10E-12 |
| COPS8    | 2q37.3        | -0.36747 | 1.17E-13 | 5.33E-12 |
| DCAF13   | 8q22.3        | -0.36693 | 1.28E-13 | 5.81E-12 |
| DHX35    | 20q11.23-q12  | -0.36685 | 1.30E-13 | 5.87E-12 |
| TMEM216  | 11q12.2       | -0.36663 | 1.35E-13 | 6.07E-12 |
| TCF7     | 5q31.1        | -0.36637 | 1.40E-13 | 6.32E-12 |
| IKZF2    | 2q34          | 0.366288 | 1.42E-13 | 6.39E-12 |
| AKNAD1   | 1p13.3        | -0.36622 | 1.44E-13 | 6.45E-12 |
| RIPK1    | 6p25.2        | 0.365882 | 1.52E-13 | 6.80E-12 |
| F3       | 1p21.3        | 0.365729 | 1.56E-13 | 6.96E-12 |
| UBA2     | 19q13.11      | -0.36567 | 1.57E-13 | 7.00E-12 |
| SLC4A4   | 4q13.3        | 0.365568 | 1.60E-13 | 7.11E-12 |
| FABP2    | 4q26          | 0.365422 | 1.64E-13 | 7.27E-12 |
| EPDR1    | 7p14.1        | -0.36498 | 1.76E-13 | 7.79E-12 |
| TCEA2    | 20q13.33      | -0.36493 | 1.78E-13 | 7.83E-12 |
| RBM39    | 20q11.22      | -0.36416 | 2.01E-13 | 8.86E-12 |
| HSF1     | 8q24.3        | -0.36413 | 2.02E-13 | 8.88E-12 |
| CORO2A   | 9q22.33       | 0.364096 | 2.03E-13 | 8.91E-12 |
| COPG1    | 3q21.3        | 0.364047 | 2.05E-13 | 8.97E-12 |
| RPS21    | 20q13.33      | -0.36403 | 2.06E-13 | 8.97E-12 |
| FADS3    | 11q12.2       | -0.36383 | 2.12E-13 | 9.24E-12 |
| E2F6     | 2p25.1        | -0.36371 | 2.17E-13 | 9.39E-12 |

|           |          |          |          |          |
|-----------|----------|----------|----------|----------|
| GALM      | 2p22.1   | 0.363706 | 2.17E-13 | 9.39E-12 |
| LY6G6F    | 6p21.33  | -0.36353 | 2.23E-13 | 9.64E-12 |
| FRMD3     | 9q21.32  | 0.363352 | 2.29E-13 | 9.88E-12 |
| GPN1      | 2p23.3   | -0.36334 | 2.30E-13 | 9.88E-12 |
| RNF19B    | 1p35.1   | 0.363339 | 2.30E-13 | 9.88E-12 |
| BCL10     | 1p22.3   | 0.363263 | 2.33E-13 | 9.98E-12 |
| NFE2      | 12q13.13 | -0.36322 | 2.35E-13 | 1.00E-11 |
| RAB26     | 16p13.3  | 0.363007 | 2.43E-13 | 1.04E-11 |
| UGT1A1    | 2q37.1   | 0.362972 | 2.44E-13 | 1.04E-11 |
| SLC35A1   | 6q15     | 0.362961 | 2.44E-13 | 1.04E-11 |
| ARMC2     | 6q21     | -0.36279 | 2.51E-13 | 1.07E-11 |
| KBTBD11   | 8p23.3   | 0.362508 | 2.63E-13 | 1.11E-11 |
| ACOT8     | 20q13.12 | -0.36249 | 2.64E-13 | 1.11E-11 |
| LRRIQ4    | 3q26.2   | 0.362153 | 2.78E-13 | 1.17E-11 |
| PCDH1     | 5q31.3   | 0.36201  | 2.85E-13 | 1.20E-11 |
| LRRC43    | 12q24.31 | -0.36196 | 2.87E-13 | 1.21E-11 |
| GTF2IRD1  | 7q11.23  | -0.36195 | 2.88E-13 | 1.21E-11 |
| GLTP      | 12q24.11 | 0.361612 | 3.04E-13 | 1.27E-11 |
| METTL5    | 2q31.1   | -0.36119 | 3.25E-13 | 1.36E-11 |
| LINC01101 | 2q14.2   | -0.36096 | 3.37E-13 | 1.40E-11 |
| APLF      | 2p13.3   | -0.36075 | 3.49E-13 | 1.45E-11 |
| ABHD1     | 2p23.3   | -0.36074 | 3.50E-13 | 1.45E-11 |
| C8ORF33   | 8q24.3   | -0.3607  | 3.52E-13 | 1.46E-11 |
| MANBAL    | 20q11.23 | -0.36043 | 3.67E-13 | 1.52E-11 |
| PLS1      | 3q23     | 0.360384 | 3.70E-13 | 1.52E-11 |
| BDH1      | 3q29     | 0.359851 | 4.03E-13 | 1.66E-11 |
| PRMT3     | 11p15.1  | -0.35983 | 4.04E-13 | 1.66E-11 |
| NT5C3B    | 17q21.2  | -0.35964 | 4.17E-13 | 1.71E-11 |
| CNN3      | 1p21.3   | -0.35958 | 4.21E-13 | 1.72E-11 |
| PGGT1B    | 5q22.3   | 0.359459 | 4.29E-13 | 1.75E-11 |
| DNMT3A    | 2p23.3   | -0.35929 | 4.40E-13 | 1.79E-11 |
| DEGS2     | 14q32.2  | 0.35918  | 4.48E-13 | 1.82E-11 |
| C8G       | 9q34.3   | 0.358929 | 4.67E-13 | 1.89E-11 |
| EIF2S2    | 20q11.22 | -0.35883 | 4.74E-13 | 1.92E-11 |
| ZGPAT     | 20q13.33 | -0.35874 | 4.81E-13 | 1.94E-11 |
| TRMT112   | 11q13.1  | -0.35865 | 4.88E-13 | 1.97E-11 |
| PSPH      | 7p11.2   | -0.35855 | 4.95E-13 | 1.99E-11 |
| SMIM14    | 4p14     | 0.358457 | 5.03E-13 | 2.02E-11 |
| CDKN1C    | 11p15.4  | -0.35841 | 5.07E-13 | 2.03E-11 |
| RASGRF1   | 15q25.1  | -0.3584  | 5.08E-13 | 2.03E-11 |
| UBE2V1    | 20q13.13 | -0.3582  | 5.24E-13 | 2.09E-11 |
| SRRD      | 22q12.1  | -0.35816 | 5.27E-13 | 2.10E-11 |
| SEMA4C    | 2q11.2   | -0.35815 | 5.29E-13 | 2.10E-11 |
| POU5F1B   | 8q24.21  | -0.35775 | 5.63E-13 | 2.23E-11 |
| CCL28     | 5p12     | 0.357744 | 5.63E-13 | 2.23E-11 |
| SCAND1    | 20q11.23 | -0.35773 | 5.64E-13 | 2.23E-11 |
| TRIM36    | 5q22.3   | 0.35762  | 5.74E-13 | 2.26E-11 |
| MARVELD3  | 16q22.2  | 0.357561 | 5.80E-13 | 2.28E-11 |
| STS       | Xp22.31  | 0.35734  | 6.01E-13 | 2.36E-11 |
| PFKP      | 10p15.2  | 0.357305 | 6.04E-13 | 2.37E-11 |
| XDH       | 2p23.1   | 0.35727  | 6.07E-13 | 2.38E-11 |
| ALDOB     | 9q31.1   | 0.357233 | 6.11E-13 | 2.38E-11 |
| FARP1     | 13q32.2  | -0.35722 | 6.12E-13 | 2.39E-11 |
| CKM       | 19q13.32 | -0.3572  | 6.14E-13 | 2.39E-11 |
| MAPK8IP1  | 11p11.2  | -0.35716 | 6.18E-13 | 2.40E-11 |
| LSM14B    | 20q13.33 | -0.35713 | 6.20E-13 | 2.40E-11 |
| ARID3A    | 19p13.3  | -0.35709 | 6.24E-13 | 2.41E-11 |
| SOX4      | 6p22.3   | -0.3567  | 6.64E-13 | 2.56E-11 |

|              |             |          |          |          |
|--------------|-------------|----------|----------|----------|
| WASHC3       | 12q23.2     | -0.35665 | 6.70E-13 | 2.58E-11 |
| LOC100129034 | 9q33.3      | 0.356446 | 6.92E-13 | 2.66E-11 |
| RHBDL2       | 1p34.3      | 0.356145 | 7.25E-13 | 2.78E-11 |
| KLK1         | 19q13.33    | 0.356099 | 7.31E-13 | 2.80E-11 |
| KCNK6        | 19q13.2     | 0.355937 | 7.49E-13 | 2.86E-11 |
| MYRF         | 11q12.2     | 0.355919 | 7.52E-13 | 2.87E-11 |
| SEMA4B       | 15q26.1     | 0.355908 | 7.53E-13 | 2.87E-11 |
| HSDL1        | 16q24.1     | -0.35574 | 7.73E-13 | 2.94E-11 |
| CSNK2A2      | 16q21       | -0.3557  | 7.78E-13 | 2.95E-11 |
| DOCK5        | 8p21.2      | 0.355625 | 7.87E-13 | 2.98E-11 |
| CAPN2        | 1q41        | 0.355529 | 7.99E-13 | 3.02E-11 |
| FJX1         | 11p13       | -0.35545 | 8.10E-13 | 3.05E-11 |
| PRSS12       | 4q26        | 0.355334 | 8.24E-13 | 3.10E-11 |
| DQX1         | 2p13.1      | 0.355293 | 8.29E-13 | 3.12E-11 |
| GGH          | 8q12.3      | -0.35516 | 8.47E-13 | 3.18E-11 |
| CYP24A1      | 20q13.2     | -0.35498 | 8.71E-13 | 3.26E-11 |
| SLC39A8      | 4q24        | 0.354683 | 9.13E-13 | 3.41E-11 |
| APOLD1       | 12p13.1     | -0.35438 | 9.57E-13 | 3.57E-11 |
| MUC17        | 7q22.1      | 0.354326 | 9.65E-13 | 3.59E-11 |
| FEM1C        | 5q22.3      | 0.354258 | 9.76E-13 | 3.63E-11 |
| RALBP1       | 18p11.22    | 0.354155 | 9.92E-13 | 3.67E-11 |
| NCBP2        | 3q29        | -0.35414 | 9.94E-13 | 3.67E-11 |
| GCH1         | 14q22.2     | 0.35414  | 9.94E-13 | 3.67E-11 |
| ZNF202       | 11q24.1     | -0.35391 | 1.03E-12 | 3.80E-11 |
| RP9          | 7p14.3      | -0.35389 | 1.03E-12 | 3.81E-11 |
| CAMTA2       | 17p13.2     | 0.353868 | 1.04E-12 | 3.81E-11 |
| CDK5R1       | 17q11.2     | -0.35382 | 1.04E-12 | 3.83E-11 |
| TSR2         | Xp11.22     | -0.3538  | 1.05E-12 | 3.84E-11 |
| AP1G1        | 16q22.2     | 0.353723 | 1.06E-12 | 3.88E-11 |
| EHHADH       | 3q27.2      | 0.353607 | 1.08E-12 | 3.94E-11 |
| NES          | 1q23.1      | -0.3533  | 1.13E-12 | 4.13E-11 |
| MBOAT1       | 6p22.3      | 0.353259 | 1.14E-12 | 4.15E-11 |
| ARL2         | 11q13.1     | -0.35319 | 1.15E-12 | 4.19E-11 |
| SH3RF1       | 4q32.3-q33  | 0.353106 | 1.17E-12 | 4.23E-11 |
| BBS10        | 12q21.2     | -0.3529  | 1.21E-12 | 4.36E-11 |
| WNT6         | 2q35        | -0.35278 | 1.23E-12 | 4.43E-11 |
| MYO18A       | 17q11.2     | 0.35271  | 1.24E-12 | 4.47E-11 |
| SNTB1        | 8q24.12     | -0.35271 | 1.24E-12 | 4.47E-11 |
| MYEF2        | 15q21.1     | -0.3526  | 1.26E-12 | 4.54E-11 |
| KRT80        | 12q13.13    | -0.35246 | 1.29E-12 | 4.63E-11 |
| FITM2        | 20q13.12    | -0.35224 | 1.34E-12 | 4.78E-11 |
| APC          | 5q22.2      | 0.352053 | 1.38E-12 | 4.91E-11 |
| SALL4        | 20q13.2     | -0.35205 | 1.38E-12 | 4.91E-11 |
| AMMECR1L     | 2q14.3      | -0.35199 | 1.39E-12 | 4.94E-11 |
| FAM107B      | 10p13       | 0.351978 | 1.39E-12 | 4.94E-11 |
| MUC5B        | 11p15.5     | 0.351942 | 1.40E-12 | 4.96E-11 |
| TBCB         | 19q13.12    | -0.35185 | 1.42E-12 | 5.02E-11 |
| CD81         | 11p15.5     | -0.35165 | 1.47E-12 | 5.18E-11 |
| COPS6        | 7q22.1      | -0.35154 | 1.49E-12 | 5.25E-11 |
| SI           | 3q26.1      | 0.351473 | 1.51E-12 | 5.30E-11 |
| ASAP2        | 2p25.1 2p24 | 0.351385 | 1.53E-12 | 5.36E-11 |
| CDC42EP5     | 19q13.42    | 0.351287 | 1.55E-12 | 5.44E-11 |
| SMPDL3A      | 6q22.31     | 0.351141 | 1.59E-12 | 5.55E-11 |
| CERS4        | 19p13.2     | -0.35102 | 1.62E-12 | 5.65E-11 |
| MRPL23-AS1   | 11p15.5     | -0.35101 | 1.62E-12 | 5.65E-11 |
| ADTRP        | 6p24.1      | 0.3509   | 1.65E-12 | 5.73E-11 |
| PALD1        | 10q22.1     | -0.35078 | 1.68E-12 | 5.83E-11 |
| FAM71E1      | 19q13.33    | -0.35067 | 1.70E-12 | 5.92E-11 |

|           |                |          |          |          |
|-----------|----------------|----------|----------|----------|
| VIT       | 2p22.2         | 0.350302 | 1.81E-12 | 6.26E-11 |
| CHMP4B    | 20q11.22       | -0.35026 | 1.82E-12 | 6.29E-11 |
| ZNF2      | 2q11.1         | -0.3502  | 1.83E-12 | 6.33E-11 |
| SRPX2     | Xq22.1         | -0.35002 | 1.89E-12 | 6.50E-11 |
| SLC13A3   | 20q13.12       | -0.34987 | 1.93E-12 | 6.64E-11 |
| GBGT1     | 9q34.2         | -0.34977 | 1.96E-12 | 6.73E-11 |
| ARHGAP26  | 5q31.3         | 0.349732 | 1.97E-12 | 6.76E-11 |
| RAP1GAP   | 1p36.12        | 0.349675 | 1.99E-12 | 6.81E-11 |
| DPF2      | 11q13.1        | -0.34957 | 2.02E-12 | 6.91E-11 |
| ZNF74     | 22q11.21       | -0.34954 | 2.03E-12 | 6.92E-11 |
| MAGI3     | 1p13.2         | 0.349507 | 2.04E-12 | 6.95E-11 |
| USP11     | Xp11.3         | -0.34948 | 2.05E-12 | 6.97E-11 |
| SLC30A7   | 1p21.2         | 0.349249 | 2.12E-12 | 7.21E-11 |
| TNNC2     | 20q13.12       | -0.34887 | 2.25E-12 | 7.63E-11 |
| ACTL10    | 20q11.22       | -0.34879 | 2.28E-12 | 7.71E-11 |
| DOP1B     | 21q22.12       | 0.348665 | 2.32E-12 | 7.85E-11 |
| SLC35C1   | 11p11.2        | 0.348573 | 2.36E-12 | 7.94E-11 |
| USP39     | 2p11.2         | -0.34847 | 2.40E-12 | 8.06E-11 |
| BHLHE41   | 12p12.1        | 0.34846  | 2.40E-12 | 8.06E-11 |
| CPSF3     | 2p25.1         | -0.3483  | 2.46E-12 | 8.25E-11 |
| HK2       | 2p12           | 0.347961 | 2.59E-12 | 8.67E-11 |
| ANKK1     | 11q23.2        | -0.34776 | 2.67E-12 | 8.93E-11 |
| GMEB2     | 20q13.33       | -0.34773 | 2.68E-12 | 8.95E-11 |
| HDAC2     | 6q21           | -0.34761 | 2.73E-12 | 9.10E-11 |
| GOLPH3L   | 1q21.3         | 0.34753  | 2.76E-12 | 9.20E-11 |
| RETSAT    | 2p11.2         | 0.347496 | 2.78E-12 | 9.23E-11 |
| CDH26     | 20q13.33       | -0.34737 | 2.84E-12 | 9.40E-11 |
| HYAL1     | 3p21.31        | 0.347145 | 2.93E-12 | 9.71E-11 |
| SMCO4     | 11q21          | 0.347038 | 2.98E-12 | 9.85E-11 |
| WDCP      | 2p23.3         | -0.347   | 3.00E-12 | 9.90E-11 |
| ALDH3A2   | 17p11.2        | 0.346824 | 3.08E-12 | 1.01E-10 |
| MFSD2A    | 1p34.2         | 0.346728 | 3.13E-12 | 1.03E-10 |
| SEC1P     | 19q13.33       | 0.346533 | 3.22E-12 | 1.06E-10 |
| VPS4B     | 18q21.33       | 0.346465 | 3.25E-12 | 1.07E-10 |
| ASRGL1    | 11q12.3        | 0.346439 | 3.27E-12 | 1.07E-10 |
| MAOA      | Xp11.3         | 0.346299 | 3.34E-12 | 1.09E-10 |
| FUT3      | 19p13.3        | 0.346177 | 3.40E-12 | 1.11E-10 |
| GAS2      | 11p14.3        | -0.34592 | 3.53E-12 | 1.15E-10 |
| RHPN1-AS1 | 8q24.3         | -0.34592 | 3.53E-12 | 1.15E-10 |
| RCN1      | 11p13          | -0.34581 | 3.59E-12 | 1.17E-10 |
| TNFRSF19  | 13q12.12       | -0.34576 | 3.62E-12 | 1.17E-10 |
| RNF145    | 5q33.3         | 0.345756 | 3.62E-12 | 1.17E-10 |
| TMC5      | 16p12.3        | 0.345717 | 3.65E-12 | 1.18E-10 |
| SH3RF2    | 5q32           | 0.345493 | 3.77E-12 | 1.22E-10 |
| ACADS     | 12q24.31       | 0.345357 | 3.85E-12 | 1.24E-10 |
| FAM83E    | 19q13.33       | 0.345228 | 3.93E-12 | 1.26E-10 |
| LRRC73    | 6p21.1         | 0.344931 | 4.11E-12 | 1.32E-10 |
| HEATR5A   | 14q12          | 0.344889 | 4.13E-12 | 1.32E-10 |
| LXN       | 3q25.32        | 0.344704 | 4.25E-12 | 1.36E-10 |
| GBP3      | 1p22.2         | 0.344604 | 4.32E-12 | 1.38E-10 |
| SNTA1     | 20q11.21       | -0.34459 | 4.32E-12 | 1.38E-10 |
| SLK       | 10q24.33-q25.1 | 0.34449  | 4.39E-12 | 1.40E-10 |
| SLAIN2    | 4p11           | 0.344343 | 4.49E-12 | 1.43E-10 |
| LOC646762 | 7p14.3         | -0.34426 | 4.54E-12 | 1.44E-10 |
| NAP1L4    | 11p15.4        | -0.3442  | 4.59E-12 | 1.45E-10 |
| EML2      | 19q13.32       | 0.344029 | 4.71E-12 | 1.49E-10 |
| RBIS      | 8q21.2         | -0.34372 | 4.93E-12 | 1.56E-10 |
| SELENOH   | 11q12.1        | -0.34368 | 4.96E-12 | 1.57E-10 |



|          |              |          |          |          |
|----------|--------------|----------|----------|----------|
| MIA2     | 14q13.2      | 0.343436 | 5.15E-12 | 1.62E-10 |
| SCGB2A1  | 11q12.3      | 0.343166 | 5.36E-12 | 1.69E-10 |
| MOGAT2   | 11q13.5      | 0.34314  | 5.38E-12 | 1.69E-10 |
| RGN      | Xp11.3       | -0.34276 | 5.70E-12 | 1.79E-10 |
| KDEL3    | 22q13.1      | 0.342748 | 5.71E-12 | 1.79E-10 |
| MED30    | 8q24.11      | -0.34223 | 6.18E-12 | 1.93E-10 |
| CCT6A    | 7p11.2       | -0.34222 | 6.18E-12 | 1.93E-10 |
| CASP10   | 2q33.1       | 0.342202 | 6.20E-12 | 1.93E-10 |
| TENT5C   | 1p12         | 0.342138 | 6.26E-12 | 1.95E-10 |
| B3GNT6   | 11q13.5      | 0.342103 | 6.29E-12 | 1.95E-10 |
| RP9P     | 7p14.3       | -0.34173 | 6.65E-12 | 2.06E-10 |
| GNA14    | 9q21.2       | 0.341718 | 6.66E-12 | 2.06E-10 |
| TPD52    | 8q21.13      | 0.341707 | 6.68E-12 | 2.06E-10 |
| MEMO1    | 2p22.3       | -0.34169 | 6.70E-12 | 2.07E-10 |
| SMCHD1   | 18p11.32     | 0.341584 | 6.80E-12 | 2.10E-10 |
| AMACR    | 5p13.2       | -0.34155 | 6.84E-12 | 2.10E-10 |
| SPIN3    | Xp11.21      | -0.34153 | 6.85E-12 | 2.10E-10 |
| PGBD1    | 6p22.1       | -0.34136 | 7.04E-12 | 2.16E-10 |
| CALML3   | 10p15.1      | -0.34129 | 7.11E-12 | 2.18E-10 |
| ZNF195   | 11p15.4      | -0.34121 | 7.19E-12 | 2.20E-10 |
| SLC2A4RG | 20q13.33     | -0.34112 | 7.29E-12 | 2.22E-10 |
| APMAP    | 20p11.21     | -0.34112 | 7.29E-12 | 2.22E-10 |
| GTF3C5   | 9q34.13      | -0.34109 | 7.33E-12 | 2.23E-10 |
| PCP4     | 21q22.2      | -0.34089 | 7.55E-12 | 2.29E-10 |
| INHBB    | 2q14.2       | -0.34043 | 8.08E-12 | 2.45E-10 |
| MAP3K6   | 1p36.11      | 0.340381 | 8.14E-12 | 2.47E-10 |
| NFS1     | 20q11.22     | -0.34031 | 8.23E-12 | 2.49E-10 |
| DENND2D  | 1p13.3-p13.2 | 0.340296 | 8.24E-12 | 2.49E-10 |
| CBX1     | 17q21.32     | -0.34021 | 8.35E-12 | 2.52E-10 |
| MPC1     | 6q27         | 0.340053 | 8.55E-12 | 2.57E-10 |
| EDEM2    | 20q11.22     | -0.33997 | 8.65E-12 | 2.60E-10 |
| ARFGAP3  | 22q13.2      | 0.339443 | 9.36E-12 | 2.81E-10 |
| MDM2     | 12q15        | 0.339386 | 9.44E-12 | 2.83E-10 |
| SGMS1    | 10q11.23     | 0.339386 | 9.44E-12 | 2.83E-10 |
| PDZK1IP1 | 1p33         | 0.339228 | 9.66E-12 | 2.89E-10 |
| ZC3HC1   | 7q32.2       | -0.33907 | 9.90E-12 | 2.95E-10 |
| AK7      | 14q32.2      | 0.338976 | 1.00E-11 | 2.99E-10 |
| POLR2G   | 11q12.3      | -0.3389  | 1.02E-11 | 3.02E-10 |
| GLS      | 2q32.2       | -0.33879 | 1.03E-11 | 3.07E-10 |
| SOCS6    | 18q22.2      | 0.33876  | 1.04E-11 | 3.07E-10 |
| SUCLG2   | 3p14.1       | 0.338562 | 1.07E-11 | 3.16E-10 |
| BCS1L    | 2q35         | -0.33854 | 1.07E-11 | 3.16E-10 |
| ALPG     | 2q37.1       | 0.338386 | 1.09E-11 | 3.23E-10 |
| HAS2-AS1 | 8q24.13      | -0.33838 | 1.10E-11 | 3.23E-10 |
| S100A14  | 1q21.3       | 0.338295 | 1.11E-11 | 3.27E-10 |
| PACSIN2  | 22q13.2      | 0.33807  | 1.15E-11 | 3.37E-10 |
| ABCD3    | 1p21.3       | 0.338046 | 1.15E-11 | 3.38E-10 |
| ZNF707   | 8q24.3       | -0.33802 | 1.16E-11 | 3.39E-10 |
| IL17REL  | 22q13.33     | 0.337975 | 1.16E-11 | 3.41E-10 |
| RBMX2    | Xq26.1       | -0.3377  | 1.21E-11 | 3.54E-10 |
| SMO      | 7q32.1       | -0.33757 | 1.24E-11 | 3.61E-10 |
| TMEM185A | Xq28         | -0.33723 | 1.30E-11 | 3.79E-10 |
| PLCG1    | 20q12        | -0.33718 | 1.31E-11 | 3.81E-10 |
| LPIN2    | 18p11.31     | 0.337131 | 1.32E-11 | 3.83E-10 |
| RNF113A  | Xq24         | -0.3371  | 1.32E-11 | 3.84E-10 |
| ZNF251   | 8q24.3       | -0.33706 | 1.33E-11 | 3.86E-10 |
| LRRC26   | 9q34.3       | 0.336929 | 1.36E-11 | 3.93E-10 |
| SERPINA1 | 14q32.13     | 0.336874 | 1.37E-11 | 3.96E-10 |

|          |               |          |          |          |
|----------|---------------|----------|----------|----------|
| LRG1     | 19p13.3       | 0.336773 | 1.39E-11 | 4.01E-10 |
| CCDC84   | 11q23.3       | -0.33665 | 1.42E-11 | 4.08E-10 |
| THADA    | 2p21          | -0.33653 | 1.44E-11 | 4.14E-10 |
| LRP3     | 19q13.11      | -0.3365  | 1.45E-11 | 4.16E-10 |
| GALNT5   | 2q24.1        | 0.336421 | 1.46E-11 | 4.20E-10 |
| PLCH1    | 3q25.31       | 0.336257 | 1.50E-11 | 4.29E-10 |
| FRMD4B   | 3p14.1        | 0.336184 | 1.51E-11 | 4.33E-10 |
| MAPK3    | 16p11.2       | 0.33617  | 1.52E-11 | 4.34E-10 |
| SEMG2    | 20q13.12      | 0.336022 | 1.55E-11 | 4.43E-10 |
| TSPAN15  | 10q22.1       | 0.335822 | 1.60E-11 | 4.55E-10 |
| NSMCE2   | 8q24.13       | -0.33579 | 1.61E-11 | 4.57E-10 |
| GPT      | 8q24.3        | 0.335745 | 1.62E-11 | 4.59E-10 |
| CXCL16   | 17p13.2       | 0.335502 | 1.67E-11 | 4.75E-10 |
| HOGA1    | 10q24.2       | -0.33539 | 1.70E-11 | 4.82E-10 |
| SLC2A8   | 9q33.3        | -0.33519 | 1.75E-11 | 4.96E-10 |
| RILP     | 17p13.3       | 0.335129 | 1.77E-11 | 4.99E-10 |
| NORAD    | 20q11.23      | -0.3351  | 1.78E-11 | 5.01E-10 |
| SNAI1    | 20q13.13      | -0.33507 | 1.78E-11 | 5.02E-10 |
| MEST     | 7q32.2        | -0.33496 | 1.81E-11 | 5.10E-10 |
| NUFIP1   | 13q14.12      | -0.33492 | 1.82E-11 | 5.12E-10 |
| TSPAN8   | 12q21.1       | 0.334915 | 1.82E-11 | 5.12E-10 |
| SHROOM2  | Xp22.2        | -0.33463 | 1.90E-11 | 5.33E-10 |
| SERPINB6 | 6p25.2        | 0.33452  | 1.93E-11 | 5.41E-10 |
| AHCY     | 20q11.22      | -0.3345  | 1.94E-11 | 5.41E-10 |
| ABHD17C  | 15q25.1       | 0.334458 | 1.95E-11 | 5.44E-10 |
| ADGRF1   | 6p12.3 6      | 0.334437 | 1.96E-11 | 5.45E-10 |
| SPPL2A   | 15q21.2       | 0.334286 | 2.00E-11 | 5.56E-10 |
| SLCO3A1  | 15q26.1       | -0.33428 | 2.00E-11 | 5.56E-10 |
| CPT2     | 1p32.3        | 0.334193 | 2.03E-11 | 5.62E-10 |
| PIP5K1B  | 9q21.11       | 0.334179 | 2.03E-11 | 5.63E-10 |
| AP3B1    | 5q14.1        | 0.33409  | 2.06E-11 | 5.69E-10 |
| MTUS1    | 8p22          | 0.333923 | 2.11E-11 | 5.82E-10 |
| RPP40    | 6p25.1        | -0.33384 | 2.13E-11 | 5.88E-10 |
| EVI5L    | 19p13.2       | 0.333696 | 2.18E-11 | 6.00E-10 |
| XKR9     | 8q13.3        | 0.33365  | 2.19E-11 | 6.04E-10 |
| ABCC3    | 17q21.33      | 0.333638 | 2.20E-11 | 6.04E-10 |
| NDUFS2   | 1q23.3        | 0.33348  | 2.25E-11 | 6.17E-10 |
| GPD2     | 2q24.1        | 0.333464 | 2.25E-11 | 6.18E-10 |
| MME      | 3q25.2        | -0.33336 | 2.29E-11 | 6.26E-10 |
| SH3BGRL3 | 1p36.11       | 0.333292 | 2.31E-11 | 6.31E-10 |
| CAPN9    | 1q42.2        | 0.333143 | 2.36E-11 | 6.44E-10 |
| CHD6     | 20q12         | -0.33314 | 2.36E-11 | 6.44E-10 |
| MSANTD4  | 11q22.3       | -0.33313 | 2.36E-11 | 6.44E-10 |
| SIPA1L2  | 1q42.2        | 0.333077 | 2.38E-11 | 6.48E-10 |
| CHRM1    | 11q12.3       | 0.332751 | 2.50E-11 | 6.78E-10 |
| RHEB     | 7q36.1        | -0.33275 | 2.50E-11 | 6.78E-10 |
| AS3MT    | 10q24.32      | -0.33271 | 2.52E-11 | 6.81E-10 |
| NXPE2    | 11q23.2-q23.3 | 0.332673 | 2.53E-11 | 6.83E-10 |
| FOXP1    | 3p13          | 0.3325   | 2.59E-11 | 7.00E-10 |
| GDA      | 9q21.13       | 0.332207 | 2.71E-11 | 7.29E-10 |
| PPM1H    | 12q14.1-q14.2 | -0.33218 | 2.72E-11 | 7.31E-10 |
| KRT40    | 17q21.2       | -0.33203 | 2.78E-11 | 7.46E-10 |
| DAPK1    | 9q21.33       | 0.332015 | 2.78E-11 | 7.47E-10 |
| THYN1    | 11q25         | -0.33196 | 2.80E-11 | 7.52E-10 |
| XBP1     | 22q12.1 22q12 | 0.331877 | 2.84E-11 | 7.60E-10 |
| NXT1     | 20p11.21      | -0.33178 | 2.88E-11 | 7.69E-10 |
| DNAJC22  | 12q13.12      | 0.331758 | 2.89E-11 | 7.71E-10 |
| ORAI2    | 7q22.1        | -0.33167 | 2.92E-11 | 7.79E-10 |

|              |                 |          |          |          |
|--------------|-----------------|----------|----------|----------|
| GTF3A        | 13q12.2         | -0.33162 | 2.95E-11 | 7.85E-10 |
| TLCD3A       | 17p13.3         | 0.331558 | 2.97E-11 | 7.90E-10 |
| MPDU1        | 17p13.1         | 0.331512 | 2.99E-11 | 7.94E-10 |
| SQOR         | 15q21.1         | 0.331442 | 3.02E-11 | 8.02E-10 |
| PLA2G10      | 16p13.12        | 0.331398 | 3.04E-11 | 8.06E-10 |
| JADE3        | Xp11.3          | -0.33138 | 3.05E-11 | 8.06E-10 |
| CRYBG3       | 3q11.2          | 0.331352 | 3.06E-11 | 8.09E-10 |
| ENGASE       | 17q25.3         | -0.33108 | 3.18E-11 | 8.40E-10 |
| NXF3         | Xq22.1          | 0.330998 | 3.22E-11 | 8.48E-10 |
| CALM3        | 19q13.32        | 0.330994 | 3.22E-11 | 8.48E-10 |
| NOSTRIN      | 2q24.3          | 0.330912 | 3.26E-11 | 8.57E-10 |
| LCN12        | 9q34.3          | -0.33089 | 3.27E-11 | 8.58E-10 |
| TMPRSS13     | 11q23.3         | -0.33075 | 3.34E-11 | 8.75E-10 |
| AREG         | 4q13.3          | -0.33073 | 3.35E-11 | 8.77E-10 |
| CDCP1        | 3p21.31         | 0.330689 | 3.37E-11 | 8.81E-10 |
| MFSD1        | 3q25.32         | 0.330676 | 3.37E-11 | 8.81E-10 |
| SCRN1        | 7p14.3          | -0.33056 | 3.43E-11 | 8.94E-10 |
| ANKRD13B     | 17q11.2         | -0.33056 | 3.43E-11 | 8.94E-10 |
| ABCB11       | 2q31.1          | 0.330521 | 3.45E-11 | 8.97E-10 |
| LARP1B       | 4q28.2          | 0.330481 | 3.47E-11 | 9.01E-10 |
| ANKRD49      | 11q21           | -0.33002 | 3.71E-11 | 9.62E-10 |
| CPLX2        | 5q35.2          | -0.33001 | 3.72E-11 | 9.63E-10 |
| PDLIM5       | 4q22.3          | 0.329929 | 3.76E-11 | 9.72E-10 |
| PLA2G12B     | 10q22.1         | -0.32992 | 3.76E-11 | 9.72E-10 |
| ZNF572       | 8q24.13         | -0.32981 | 3.82E-11 | 9.86E-10 |
| PCSK7        | 11q23.3         | 0.329757 | 3.85E-11 | 9.93E-10 |
| TNFRSF14-AS1 | 1p36.32         | 0.329675 | 3.90E-11 | 1.00E-09 |
| CKMT1B       | 15q15.3         | 0.329621 | 3.93E-11 | 1.01E-09 |
| LAS1L        | Xq12            | -0.32952 | 3.98E-11 | 1.02E-09 |
| BCO1         | 16q23.2         | 0.329481 | 4.01E-11 | 1.03E-09 |
| IGF2-AS      | 11p15.5         | -0.32948 | 4.01E-11 | 1.03E-09 |
| SIDT2        | 11q23.3         | 0.329295 | 4.11E-11 | 1.05E-09 |
| MYO1C        | 17p13.3         | 0.329161 | 4.19E-11 | 1.07E-09 |
| MTG2         | 20q13.33        | -0.3291  | 4.23E-11 | 1.08E-09 |
| WDR55        | 5q31.3          | 0.329086 | 4.24E-11 | 1.08E-09 |
| VSIG2        | 11q24.2         | 0.329045 | 4.26E-11 | 1.09E-09 |
| ANTXR2       | 4q21.21         | 0.32891  | 4.35E-11 | 1.10E-09 |
| LONRF3       | Xq24            | 0.328877 | 4.37E-11 | 1.11E-09 |
| ZNF503-AS2   | 10q22.2         | -0.32878 | 4.43E-11 | 1.12E-09 |
| ZDHHC4       | 7p22.1          | -0.32876 | 4.45E-11 | 1.13E-09 |
| TCP11L2      | 12q23.3         | 0.32872  | 4.47E-11 | 1.13E-09 |
| SLC25A48     | 5q31.1          | 0.328544 | 4.58E-11 | 1.16E-09 |
| RNASEL       | 1q25.3          | 0.328495 | 4.61E-11 | 1.16E-09 |
| SRD5A3       | 4q12            | 0.32849  | 4.62E-11 | 1.16E-09 |
| MAP7D2       | Xp22.12         | -0.32844 | 4.65E-11 | 1.17E-09 |
| TMEM253      | 14q11.2         | 0.328412 | 4.67E-11 | 1.17E-09 |
| DIAPH1       | 5q31.3          | 0.328372 | 4.70E-11 | 1.18E-09 |
| GBX2         | 2q37.2          | -0.32836 | 4.71E-11 | 1.18E-09 |
| PHF20        | 20q11.22-q11.23 | -0.32835 | 4.71E-11 | 1.18E-09 |
| CFAP74       | 1p36.33         | -0.32816 | 4.84E-11 | 1.21E-09 |
| KCNMB4       | 12q15           | -0.32812 | 4.87E-11 | 1.22E-09 |
| PPP4R1       | 18p11.22        | 0.328087 | 4.89E-11 | 1.22E-09 |
| WDR74        | 11q12.3         | -0.32786 | 5.05E-11 | 1.26E-09 |
| GPSM2        | 1p13.3          | -0.32758 | 5.25E-11 | 1.31E-09 |
| PAFAH2       | 1p36.11         | 0.327582 | 5.25E-11 | 1.31E-09 |
| DHX34        | 19q13.32        | -0.32756 | 5.27E-11 | 1.31E-09 |
| TMEM171      | 5q13.2          | 0.327107 | 5.62E-11 | 1.39E-09 |
| ZNF273       | 7q11.21         | -0.32708 | 5.65E-11 | 1.40E-09 |

|           |          |          |          |          |
|-----------|----------|----------|----------|----------|
| FAAP24    | 19q13.11 | -0.32705 | 5.67E-11 | 1.40E-09 |
| KCTD1     | 18q11.2  | 0.326796 | 5.88E-11 | 1.45E-09 |
| UGDH      | 4p14     | 0.326795 | 5.88E-11 | 1.45E-09 |
| KRT83     | 12q13.13 | -0.32669 | 5.97E-11 | 1.47E-09 |
| C2ORF49   | 2q12.2   | -0.32666 | 5.99E-11 | 1.47E-09 |
| LOC145783 | 15q21.3  | -0.32662 | 6.03E-11 | 1.48E-09 |
| ABCG8     | 2p21     | 0.326498 | 6.13E-11 | 1.50E-09 |
| WDR44     | Xq24     | 0.326444 | 6.18E-11 | 1.51E-09 |
| FBXO2     | 1p36.22  | -0.32641 | 6.21E-11 | 1.52E-09 |
| MAGED2    | Xp11.21  | -0.32637 | 6.24E-11 | 1.53E-09 |
| BLVRB     | 19q13.2  | 0.326353 | 6.26E-11 | 1.53E-09 |
| TOR1B     | 9q34.11  | 0.326274 | 6.33E-11 | 1.54E-09 |
| PIP4P2    | 8q21.3   | -0.32619 | 6.40E-11 | 1.56E-09 |
| CAPN10    | 2q37.3   | -0.32617 | 6.42E-11 | 1.56E-09 |
| AFAP1L2   | 10q25.3  | 0.326004 | 6.57E-11 | 1.60E-09 |
| ACER3     | 11q13.5  | 0.326004 | 6.57E-11 | 1.60E-09 |
| S100A16   | 1q21.3   | 0.325957 | 6.62E-11 | 1.60E-09 |
| ATP5F1A   | 18q21.1  | 0.325872 | 6.70E-11 | 1.62E-09 |
| SETDB2    | 13q14.2  | -0.32572 | 6.84E-11 | 1.66E-09 |
| CHST6     | 16q23.1  | 0.325553 | 7.01E-11 | 1.69E-09 |
| TADA2B    | 4p16.1   | 0.325546 | 7.01E-11 | 1.69E-09 |
| NOD2      | 16q12.1  | -0.32547 | 7.09E-11 | 1.71E-09 |
| FZD5      | 2q33.3   | 0.325327 | 7.23E-11 | 1.74E-09 |
| GLRX      | 5q15     | 0.325203 | 7.36E-11 | 1.77E-09 |
| RBM4      | 11q13.2  | -0.325   | 7.58E-11 | 1.82E-09 |
| SLC7A10   | 19q13.11 | -0.32497 | 7.61E-11 | 1.83E-09 |
| CBX3      | 7p15.2   | -0.3249  | 7.69E-11 | 1.84E-09 |
| NSUN5     | 7q11.23  | -0.32485 | 7.74E-11 | 1.85E-09 |
| BAG3      | 10q26.11 | 0.324805 | 7.79E-11 | 1.86E-09 |
| FOXA1     | 14q21.1  | 0.324608 | 8.01E-11 | 1.91E-09 |
| DAPP1     | 4q23     | 0.324576 | 8.04E-11 | 1.92E-09 |
| TIMM17B   | Xp11.23  | -0.32449 | 8.15E-11 | 1.94E-09 |
| CHST13    | 3q21.3   | -0.32447 | 8.16E-11 | 1.94E-09 |
| ELAVL2    | 9p21.3   | -0.32447 | 8.17E-11 | 1.94E-09 |
| RPS6KA1   | 1p36.11  | 0.324448 | 8.19E-11 | 1.94E-09 |
| LRRRC61   | 7q36.1   | -0.32441 | 8.24E-11 | 1.95E-09 |
| CASP5     | 11q22.3  | 0.324307 | 8.35E-11 | 1.98E-09 |
| AKAP5     | 14q23.3  | 0.32428  | 8.38E-11 | 1.98E-09 |
| TMED10    | 14q24.3  | 0.324258 | 8.41E-11 | 1.99E-09 |
| SCAMP2    | 15q24.1  | 0.324074 | 8.63E-11 | 2.04E-09 |
| DYRK1B    | 19q13.2  | -0.32406 | 8.65E-11 | 2.04E-09 |
| FAM102B   | 1p13.3   | 0.323889 | 8.86E-11 | 2.08E-09 |
| PLEKHA8P1 | 12q12    | -0.32361 | 9.21E-11 | 2.17E-09 |
| CYHR1     | 8q24.3   | -0.32357 | 9.27E-11 | 2.18E-09 |
| PMS2P1    | 7q22.1   | -0.32356 | 9.28E-11 | 2.18E-09 |
| GDF11     | 12q13.2  | -0.32346 | 9.40E-11 | 2.20E-09 |
| CDKN2C    | 1p32.3   | 0.323421 | 9.46E-11 | 2.21E-09 |
| RNF43     | 17q22    | -0.32324 | 9.71E-11 | 2.27E-09 |
| TRIM16L   | 17p11.2  | 0.323206 | 9.75E-11 | 2.28E-09 |
| GRINA     | 8q24.3   | -0.32319 | 9.78E-11 | 2.28E-09 |
| GJB5      | 1p34.3   | 0.32313  | 9.85E-11 | 2.29E-09 |
| LAGE3     | Xq28     | -0.3231  | 9.89E-11 | 2.30E-09 |
| HID1      | 17q25.1  | 0.322938 | 1.01E-10 | 2.35E-09 |
| VAV3      | 1p13.3   | -0.32291 | 1.02E-10 | 2.36E-09 |
| NEU1      | 6p21.33  | -0.32282 | 1.03E-10 | 2.39E-09 |
| KCNK9     | 8q24.3   | -0.32268 | 1.05E-10 | 2.43E-09 |
| HIPK1     | 1p13.2   | 0.322566 | 1.07E-10 | 2.47E-09 |
| ZPR1      | 11q23.3  | -0.32243 | 1.09E-10 | 2.51E-09 |

|           |            |          |          |          |
|-----------|------------|----------|----------|----------|
| BBS5      | 2q31.1     | -0.32242 | 1.09E-10 | 2.51E-09 |
| RNF219    | 13q31.1    | -0.32241 | 1.09E-10 | 2.51E-09 |
| MAP1LC3A  | 20q11.22   | -0.3224  | 1.09E-10 | 2.51E-09 |
| NSMCE3    | 15q13.1    | -0.32237 | 1.10E-10 | 2.52E-09 |
| HUNK      | 21q22.11   | -0.3223  | 1.11E-10 | 2.54E-09 |
| KLHL31    | 6p12.1     | -0.32225 | 1.11E-10 | 2.56E-09 |
| RNPEP     | 1q32.1     | 0.322226 | 1.12E-10 | 2.56E-09 |
| HABP4     | 9q22.32    | -0.32199 | 1.16E-10 | 2.65E-09 |
|           | 2-Mar 1q41 | 0.321846 | 1.18E-10 | 2.70E-09 |
| UMODL1    | 21q22.3    | -0.3218  | 1.19E-10 | 2.71E-09 |
| CYP3A5    | 7q22.1     | 0.321687 | 1.21E-10 | 2.75E-09 |
| SLC25A26  | 3p14.1     | -0.32156 | 1.23E-10 | 2.79E-09 |
| C11ORF74  | 11p12      | -0.32155 | 1.23E-10 | 2.80E-09 |
| PIN4P1    | 15q15.3    | -0.32143 | 1.25E-10 | 2.84E-09 |
| GAREM1    | 18q12.1    | 0.321355 | 1.26E-10 | 2.87E-09 |
| NKPD1     | 19q13.32   | -0.32133 | 1.27E-10 | 2.87E-09 |
| LINC01550 | 14q32.2    | 0.321258 | 1.28E-10 | 2.90E-09 |
| COL4A3BP  | 5q13.3     | 0.321226 | 1.29E-10 | 2.91E-09 |
| DUS4L     | 7q22.3     | -0.32119 | 1.29E-10 | 2.92E-09 |
| TMCC3     | 12q22      | 0.321104 | 1.31E-10 | 2.95E-09 |
| TRAK1     | 3p22.1     | 0.320637 | 1.39E-10 | 3.15E-09 |
| AQP3      | 9p13.3     | 0.320625 | 1.40E-10 | 3.15E-09 |
| UBE2C     | 20q13.12   | -0.32053 | 1.42E-10 | 3.19E-09 |
| CAPN8     | 1q41       | 0.32051  | 1.42E-10 | 3.19E-09 |
| SRSF6     | 20q13.11   | -0.32043 | 1.44E-10 | 3.22E-09 |
| LGALS4    | 19q13.2    | 0.320283 | 1.47E-10 | 3.29E-09 |
| TRIM16    | 17p12      | 0.320109 | 1.50E-10 | 3.36E-09 |
| KLF3      | 4p14       | 0.319957 | 1.53E-10 | 3.43E-09 |
| SMIM1     | 1p36.32    | -0.31981 | 1.56E-10 | 3.50E-09 |
| PCBP4     | 3p21.2     | -0.31977 | 1.57E-10 | 3.51E-09 |
| CKAP4     | 12q23.3    | 0.319571 | 1.62E-10 | 3.61E-09 |
| SEC14L4   | 22q12.2    | -0.31954 | 1.62E-10 | 3.62E-09 |
| HAP1      | 17q21.2    | -0.31937 | 1.66E-10 | 3.70E-09 |
| TMEM229B  | 14q24.1    | 0.319344 | 1.67E-10 | 3.71E-09 |
| TAF4      | 20q13.33   | -0.31931 | 1.68E-10 | 3.72E-09 |
| TMEM173   | 5q31.2     | 0.31915  | 1.71E-10 | 3.80E-09 |
| MGLL      | 3q21.3     | 0.319104 | 1.72E-10 | 3.82E-09 |
| TLE6      | 19p13.3    | 0.319088 | 1.73E-10 | 3.82E-09 |
| TIPARP    | 3q25.31    | 0.319078 | 1.73E-10 | 3.83E-09 |
| LTBP4     | 19q13.2    | 0.318754 | 1.81E-10 | 4.00E-09 |
| ZFP64     | 20q13.2    | -0.31866 | 1.83E-10 | 4.05E-09 |
| NUCB2     | 11p15.1    | 0.318644 | 1.84E-10 | 4.05E-09 |
| LMAN2L    | 2q11.2     | -0.31858 | 1.85E-10 | 4.08E-09 |
| BCL2L1    | 20q11.21   | -0.31848 | 1.88E-10 | 4.13E-09 |
| PIN4      | Xq13.1     | -0.31843 | 1.89E-10 | 4.15E-09 |
| SHISA4    | 1q32.1     | -0.31838 | 1.91E-10 | 4.18E-09 |
| RNASEH2B  | 13q14.3    | -0.31823 | 1.95E-10 | 4.26E-09 |
| DHDDS     | 1p36.11    | 0.318215 | 1.95E-10 | 4.27E-09 |
| TMEM189   | 20q13.13   | -0.31821 | 1.95E-10 | 4.27E-09 |
| RPIA      | 2p11.2     | -0.31816 | 1.96E-10 | 4.29E-09 |
| ALDH9A1   | 1q24.1     | 0.317939 | 2.02E-10 | 4.42E-09 |
| CEP250    | 20q11.22   | -0.31789 | 2.04E-10 | 4.44E-09 |
| TYW5      | 2q33.1     | -0.31783 | 2.05E-10 | 4.47E-09 |
| ISM2      | 14q24.3    | -0.31775 | 2.08E-10 | 4.52E-09 |
| XG        | Xp22.33    | -0.31759 | 2.12E-10 | 4.61E-09 |
| ALPI      | 2q37.1     | 0.317544 | 2.14E-10 | 4.64E-09 |
| STK4      | 20q13.12   | -0.31752 | 2.14E-10 | 4.64E-09 |
| AGFG2     | 7q22.1     | 0.317523 | 2.14E-10 | 4.64E-09 |

|          |                 |          |          |          |
|----------|-----------------|----------|----------|----------|
| YWHAQ    | 2p25.1          | -0.31745 | 2.17E-10 | 4.68E-09 |
| HM13     | 20q11.21        | -0.31744 | 2.17E-10 | 4.69E-09 |
| OGDHL    | 10q11.23        | -0.31714 | 2.26E-10 | 4.88E-09 |
| VEGFB    | 11q13.1         | -0.31698 | 2.31E-10 | 4.98E-09 |
| COLCA2   | 11q23.1         | 0.316806 | 2.36E-10 | 5.09E-09 |
| SYT13    | 11p11.2         | 0.316709 | 2.40E-10 | 5.16E-09 |
| ST3GAL4  | 11q24.2         | 0.316287 | 2.54E-10 | 5.46E-09 |
| RAB27A   | 15q21.3         | 0.316238 | 2.56E-10 | 5.49E-09 |
| RPL36A   | Xq22.1          | -0.31621 | 2.57E-10 | 5.50E-09 |
| RCOR1    | 14q32.31-q32.32 | 0.316122 | 2.60E-10 | 5.56E-09 |
| SH2D1B   | 1q23.3          | 0.316111 | 2.60E-10 | 5.56E-09 |
| GJC3     | 7q22.1          | -0.31606 | 2.62E-10 | 5.60E-09 |
| MAPRE2   | 18q12.1-q12.2   | 0.316031 | 2.63E-10 | 5.61E-09 |
| TNK1     | 17p13.1         | 0.315976 | 2.65E-10 | 5.65E-09 |
| MVP      | 16p11.2         | 0.315965 | 2.65E-10 | 5.65E-09 |
| DGKQ     | 4p16.3          | 0.315922 | 2.67E-10 | 5.68E-09 |
| KHDRBS3  | 8q24.23         | -0.3159  | 2.68E-10 | 5.69E-09 |
| TMEM132A | 11q12.2         | -0.31583 | 2.70E-10 | 5.74E-09 |
| DTWD2    | 5q23.1          | 0.315743 | 2.73E-10 | 5.80E-09 |
| ZSWIM6   | 5q12.1          | 0.315709 | 2.75E-10 | 5.82E-09 |
| RAPGEF4  | 2q31.1          | -0.31567 | 2.76E-10 | 5.84E-09 |
| ACO2     | 22q13.2         | 0.31565  | 2.77E-10 | 5.86E-09 |
| YAP1     | 11q22.1         | -0.31563 | 2.78E-10 | 5.86E-09 |
| SLC6A4   | 17q11.2         | -0.3154  | 2.86E-10 | 6.05E-09 |
| ZNF182   | Xp11.23         | -0.31532 | 2.90E-10 | 6.11E-09 |
| ACPP     | 3q22.1          | 0.315183 | 2.95E-10 | 6.21E-09 |
| C6ORF136 | 6p21.33         | 0.315176 | 2.95E-10 | 6.21E-09 |
| TMEM30B  | 14q23.1         | 0.315039 | 3.01E-10 | 6.32E-09 |
| NOS2     | 17q11.2         | 0.314968 | 3.04E-10 | 6.38E-09 |
| PTDSS2   | 11p15.5         | -0.31493 | 3.05E-10 | 6.41E-09 |
| UBE3D    | 6q14.1          | -0.31487 | 3.08E-10 | 6.45E-09 |
| KITLG    | 12q21.32        | 0.314742 | 3.13E-10 | 6.56E-09 |
| ETFBKMT  | 12p11.21        | 0.314595 | 3.20E-10 | 6.68E-09 |
| GEMIN6   | 2p22.1          | -0.31459 | 3.20E-10 | 6.68E-09 |
| HILPDA   | 7q32.1          | -0.31452 | 3.23E-10 | 6.74E-09 |
| B4GALNT2 | 17q21.32        | 0.31444  | 3.26E-10 | 6.80E-09 |
| GDAP1L1  | 20q13.12        | -0.31432 | 3.32E-10 | 6.91E-09 |
| CTNNB1   | 3p22.1          | -0.3143  | 3.32E-10 | 6.91E-09 |
| TRIM14   | 9q22.33         | 0.314201 | 3.37E-10 | 7.01E-09 |
| EMX1     | 2p13.2          | 0.313955 | 3.49E-10 | 7.23E-09 |
| SF3B6    | 2p23.3          | -0.31372 | 3.60E-10 | 7.46E-09 |
| REP15    | 12p11.22        | 0.313649 | 3.63E-10 | 7.52E-09 |
| ZADH2    | 18q22.3         | 0.313587 | 3.66E-10 | 7.58E-09 |
| GTF3C3   | 2q33.1          | -0.31352 | 3.70E-10 | 7.64E-09 |
| RPS7     | 2p25.3          | -0.3134  | 3.76E-10 | 7.76E-09 |
| FLNB     | 3p14.3          | 0.313394 | 3.76E-10 | 7.76E-09 |
| AASDHPPT | 11q22.3         | -0.31338 | 3.77E-10 | 7.76E-09 |
| FAM226B  | Xq13.1          | -0.3133  | 3.81E-10 | 7.84E-09 |
| FOXA3    | 19q13.32        | 0.313295 | 3.81E-10 | 7.84E-09 |
| RNF141   | 11p15.4 11p15   | 0.313264 | 3.83E-10 | 7.86E-09 |
| ADCY9    | 16p13.3         | 0.313241 | 3.84E-10 | 7.88E-09 |
| LTO1     | 11q13.3         | -0.31322 | 3.85E-10 | 7.90E-09 |
| P2RY1    | 3q25.2          | 0.313199 | 3.86E-10 | 7.91E-09 |
| LRRC29   | 16q22.1         | -0.31309 | 3.92E-10 | 8.02E-09 |
| PTGER4   | 5p13.1          | 0.312997 | 3.97E-10 | 8.11E-09 |
| CDKN1B   | 12p13.1         | -0.31295 | 4.00E-10 | 8.16E-09 |
| UTP23    | 8q24.11         | -0.31288 | 4.03E-10 | 8.22E-09 |
| PHYHIPL  | 10q21.1         | -0.31284 | 4.05E-10 | 8.26E-09 |

|            |              |          |          |          |
|------------|--------------|----------|----------|----------|
| CAMKMT     | 2p21         | -0.31281 | 4.07E-10 | 8.28E-09 |
| CHCHD7     | 8q12.1       | -0.31266 | 4.15E-10 | 8.44E-09 |
| CCDC149    | 4p15.2       | 0.312508 | 4.24E-10 | 8.61E-09 |
| NDEL1      | 17p13.1      | 0.312387 | 4.31E-10 | 8.74E-09 |
| MUC13      | 3q21.2       | 0.31235  | 4.33E-10 | 8.78E-09 |
| C1GALT1C1L | 2p21         | -0.31234 | 4.33E-10 | 8.78E-09 |
| RND2       | 17q21.31     | -0.31233 | 4.34E-10 | 8.79E-09 |
| BCAP31     | Xq28         | -0.31232 | 4.35E-10 | 8.79E-09 |
| ADGRG1     | 16q21        | -0.31223 | 4.40E-10 | 8.89E-09 |
| NUDCD1     | 8q23.1       | -0.31221 | 4.41E-10 | 8.89E-09 |
| PPP1R13B   | 14q32.33     | 0.31221  | 4.41E-10 | 8.89E-09 |
| SSBP4      | 19p13.11     | -0.312   | 4.54E-10 | 9.14E-09 |
| TSPAN3     | 15q24.3      | 0.31198  | 4.55E-10 | 9.15E-09 |
| STARD5     | 15q25.1      | 0.311833 | 4.64E-10 | 9.31E-09 |
| ZDHHC7     | 16q24.1      | 0.311833 | 4.64E-10 | 9.31E-09 |
| PAH        | 12q23.2      | -0.31182 | 4.65E-10 | 9.32E-09 |
| OGFR       | 20q13.33     | -0.31176 | 4.69E-10 | 9.38E-09 |
| CCDC85B    | 11q13.1      | -0.31173 | 4.70E-10 | 9.41E-09 |
| LPAR5      | 12p13.31     | 0.311723 | 4.71E-10 | 9.41E-09 |
| SAR1B      | 5q31.1       | 0.311705 | 4.72E-10 | 9.43E-09 |
| ABCG5      | 2p21         | 0.311686 | 4.73E-10 | 9.44E-09 |
| PLAAT2     | 11q12.3      | 0.311627 | 4.77E-10 | 9.51E-09 |
| CLCA3P     | 1p22.3       | 0.311606 | 4.78E-10 | 9.53E-09 |
| IMPA2      | 18p11.21     | 0.311593 | 4.79E-10 | 9.53E-09 |
| NIFK       | 2q14.3       | -0.31156 | 4.81E-10 | 9.56E-09 |
| SLC52A2    | 8q24.3       | -0.31148 | 4.87E-10 | 9.66E-09 |
| ZNF71      | 19q13.43     | -0.31146 | 4.88E-10 | 9.67E-09 |
| ABCC13     | 21q11.2      | 0.311416 | 4.91E-10 | 9.72E-09 |
| ZNF563     | 19p13.2      | -0.31137 | 4.94E-10 | 9.78E-09 |
| VAPA       | 18p11.22     | 0.311317 | 4.97E-10 | 9.83E-09 |
| GNPNAT1    | 14q22.1      | 0.311293 | 4.99E-10 | 9.85E-09 |
| KAT2B      | 3p24.3       | 0.311177 | 5.07E-10 | 1.00E-08 |
| MEGF11     | 15q22.31     | -0.31116 | 5.08E-10 | 1.00E-08 |
| DMD        | Xp21.2-p21.1 | -0.31114 | 5.10E-10 | 1.00E-08 |
| TBC1D10A   | 22q12.2      | 0.311045 | 5.16E-10 | 1.01E-08 |
| SLC10A7    | 4q31.22      | 0.310846 | 5.30E-10 | 1.04E-08 |
| TBC1D2     | 9q22.33      | 0.310809 | 5.32E-10 | 1.05E-08 |
| CPEB2      | 4p15.32      | 0.310804 | 5.33E-10 | 1.05E-08 |
| MYH7B      | 20q11.22     | -0.31078 | 5.34E-10 | 1.05E-08 |
| DMBT1      | 10q26.13     | 0.310765 | 5.36E-10 | 1.05E-08 |
| LETM1      | 4p16.3       | 0.310673 | 5.42E-10 | 1.06E-08 |
| KRT38      | 17q21.2      | -0.31065 | 5.44E-10 | 1.06E-08 |
| QSOX1      | 1q25.2       | 0.310644 | 5.44E-10 | 1.06E-08 |
| RAMP2-AS1  | 17q21.2      | -0.31064 | 5.44E-10 | 1.06E-08 |
| GBF1       | 10q24.32     | 0.310588 | 5.48E-10 | 1.07E-08 |
| NONO       | Xq13.1       | -0.31052 | 5.54E-10 | 1.08E-08 |
| IGF2       | 11p15.5      | -0.31036 | 5.65E-10 | 1.10E-08 |
| C4BPA      | 1q32.2       | 0.310336 | 5.67E-10 | 1.10E-08 |
| SERPINB1   | 6p25.2       | 0.310039 | 5.90E-10 | 1.15E-08 |
| ENOX2      | Xq26.1       | -0.31002 | 5.92E-10 | 1.15E-08 |
| KIAA0040   | 1q25.1       | 0.309984 | 5.94E-10 | 1.15E-08 |
| AHCYL1     | 1p13.3       | 0.309947 | 5.97E-10 | 1.16E-08 |
| HEPHL1     | 11q21        | -0.30984 | 6.06E-10 | 1.17E-08 |
| ANKRD27    | 19q13.11     | -0.30983 | 6.07E-10 | 1.17E-08 |
| GCSAM      | 3q13.2       | 0.309802 | 6.09E-10 | 1.18E-08 |
| GNB1L      | 22q11.21     | -0.30978 | 6.10E-10 | 1.18E-08 |
| TCN1       | 11q12.1      | 0.309755 | 6.13E-10 | 1.18E-08 |
| ELF5       | 11p13        | -0.30973 | 6.15E-10 | 1.18E-08 |

|           |          |          |          |          |
|-----------|----------|----------|----------|----------|
| GOT1      | 10q24.2  | 0.309629 | 6.23E-10 | 1.20E-08 |
| COLCA1    | 11q23.1  | 0.309587 | 6.27E-10 | 1.20E-08 |
| IPO8      | 12p11.21 | 0.309434 | 6.40E-10 | 1.23E-08 |
| ZMYND15   | 17p13.2  | 0.309309 | 6.50E-10 | 1.25E-08 |
| PUS7      | 7q22.3   | -0.30904 | 6.74E-10 | 1.29E-08 |
| NFKB1     | 4q24     | 0.308982 | 6.79E-10 | 1.30E-08 |
| COIL      | 17q22    | -0.30888 | 6.88E-10 | 1.32E-08 |
| RASEF     | 9q21.32  | 0.308833 | 6.93E-10 | 1.32E-08 |
| PRDM8     | 4q21.21  | 0.308809 | 6.95E-10 | 1.33E-08 |
| STAU1     | 20q13.13 | -0.30856 | 7.19E-10 | 1.37E-08 |
| WSB2      | 12q24.23 | 0.308508 | 7.23E-10 | 1.38E-08 |
| ENTPD8    | 9q34.3   | 0.308499 | 7.24E-10 | 1.38E-08 |
| FAM189A2  | 9q21.12  | 0.308449 | 7.29E-10 | 1.38E-08 |
| GAK       | 4p16.3   | 0.308445 | 7.29E-10 | 1.38E-08 |
| STARD3    | 17q12    | -0.30836 | 7.38E-10 | 1.40E-08 |
| WWP2      | 16q22.1  | 0.30828  | 7.46E-10 | 1.41E-08 |
| MYL3      | 3p21.31  | -0.30818 | 7.55E-10 | 1.43E-08 |
| NOD1      | 7p14.3   | -0.30817 | 7.57E-10 | 1.43E-08 |
| SMOC2     | 6q27     | -0.3081  | 7.64E-10 | 1.44E-08 |
| ZMYND8    | 20q13.12 | -0.30804 | 7.69E-10 | 1.45E-08 |
| C7ORF26   | 7p22.1   | -0.30799 | 7.74E-10 | 1.46E-08 |
| ARF6      | 14q21.3  | 0.30798  | 7.76E-10 | 1.46E-08 |
| RPRD1B    | 20q11.23 | -0.30794 | 7.80E-10 | 1.47E-08 |
| IGF2BP1   | 17q21.32 | -0.3079  | 7.84E-10 | 1.47E-08 |
| PIAS2     | 18q21.1  | 0.307877 | 7.86E-10 | 1.48E-08 |
| TTC22     | 1p32.3   | 0.307867 | 7.88E-10 | 1.48E-08 |
| TCEA3     | 1p36.12  | 0.307547 | 8.22E-10 | 1.54E-08 |
| MTHFR     | 1p36.22  | 0.30754  | 8.22E-10 | 1.54E-08 |
| ZNF280C   | Xq26.1   | -0.30754 | 8.23E-10 | 1.54E-08 |
| AHR       | 7p21.1   | 0.307457 | 8.31E-10 | 1.55E-08 |
| PVT1      | 8q24.21  | -0.30745 | 8.32E-10 | 1.55E-08 |
| SERPINA10 | 14q32.13 | -0.30726 | 8.53E-10 | 1.59E-08 |
| TOX       | 8q12.1   | 0.307248 | 8.55E-10 | 1.59E-08 |
| GJA9      | 1p34.3   | 0.307147 | 8.66E-10 | 1.61E-08 |
| BTNL9     | 5q35.3   | 0.307138 | 8.67E-10 | 1.61E-08 |
| SH2D4A    | 8p21.3   | 0.306825 | 9.04E-10 | 1.68E-08 |
| APAF1     | 12q23.1  | 0.306701 | 9.18E-10 | 1.71E-08 |
| NEURL2    | 20q13.12 | -0.30665 | 9.25E-10 | 1.72E-08 |
| PPARGC1A  | 4p15.2   | 0.306573 | 9.34E-10 | 1.73E-08 |
| COL9A3    | 20q13.33 | -0.30651 | 9.42E-10 | 1.75E-08 |
| TTC39B    | 9p22.3   | 0.306289 | 9.70E-10 | 1.79E-08 |
| SNHG15    | 7p13     | -0.30619 | 9.82E-10 | 1.82E-08 |
| PRDX5     | 11q13.1  | -0.30618 | 9.84E-10 | 1.82E-08 |
| ITGB7     | 12q13.13 | 0.306114 | 9.92E-10 | 1.83E-08 |
| RPH3AL    | 17p13.3  | 0.306045 | 1.00E-09 | 1.85E-08 |
| CXCL17    | 19q13.2  | 0.306026 | 1.00E-09 | 1.85E-08 |
| PATZ1     | 22q12.2  | -0.306   | 1.01E-09 | 1.85E-08 |
| POLG2     | 17q23.3  | -0.30599 | 1.01E-09 | 1.86E-08 |
| TMBIM6    | 12q13.12 | 0.305765 | 1.04E-09 | 1.91E-08 |
| GSDMB     | 17q21.1  | 0.305693 | 1.05E-09 | 1.93E-08 |
| RBP3      | 10q11.22 | 0.305622 | 1.06E-09 | 1.94E-08 |
| LINC00623 | 1p11.2   | -0.30553 | 1.07E-09 | 1.96E-08 |
| HSF2BP    | 21q22.3  | -0.30551 | 1.07E-09 | 1.97E-08 |
| OLFML3    | 1p13.2   | -0.30547 | 1.08E-09 | 1.97E-08 |
| TSPEAR    | 21q22.3  | -0.30538 | 1.09E-09 | 2.00E-08 |
| ZNF34     | 8q24.3   | -0.30534 | 1.10E-09 | 2.01E-08 |
| DNAH2     | 17p13.1  | 0.305322 | 1.10E-09 | 2.01E-08 |
| ZSCAN25   | 7q22.1   | -0.3053  | 1.10E-09 | 2.01E-08 |



|                 |                |          |          |          |
|-----------------|----------------|----------|----------|----------|
| EXOSC5          | 19q13.2        | -0.30529 | 1.11E-09 | 2.01E-08 |
| KCNA6           | 12p13.32       | 0.305141 | 1.13E-09 | 2.05E-08 |
| EFNA4           | 1q21.3         | -0.30507 | 1.14E-09 | 2.07E-08 |
| TTC9B           | 19q13.2        | 0.304787 | 1.18E-09 | 2.14E-08 |
| ZBTB7B          | 1q21.3         | 0.304545 | 1.22E-09 | 2.21E-08 |
| BCL2L15         | 1p13.2         | 0.304521 | 1.22E-09 | 2.22E-08 |
| DAP             | 5p15.2         | 0.304426 | 1.24E-09 | 2.24E-08 |
| ANKRD13D        | 11q13.2        | -0.30437 | 1.25E-09 | 2.26E-08 |
| TMEM185B        | 2q14.2         | -0.30424 | 1.27E-09 | 2.29E-08 |
| ZFP41           | 8q24.3         | -0.30392 | 1.32E-09 | 2.39E-08 |
| RNF148          | 7q31.32        | 0.303874 | 1.33E-09 | 2.40E-08 |
| ZNF786          | 7q36.1         | -0.30375 | 1.35E-09 | 2.44E-08 |
| CMSS1           | 3q12.1         | -0.30371 | 1.36E-09 | 2.45E-08 |
| PPP1R35         | 7q22.1         | -0.3037  | 1.36E-09 | 2.45E-08 |
| NAT9            | 17q25.1        | -0.30369 | 1.36E-09 | 2.45E-08 |
| NR6A1           | 9q33.3         | -0.30355 | 1.39E-09 | 2.49E-08 |
| CLNS1A          | 11q14.1        | -0.30345 | 1.41E-09 | 2.52E-08 |
| ONECUT3         | 19p13.3        | 0.303407 | 1.41E-09 | 2.53E-08 |
| FUT6            | 19p13.3        | 0.303295 | 1.43E-09 | 2.57E-08 |
| TPRKB           | 2p13.1         | -0.30329 | 1.44E-09 | 2.57E-08 |
| CRIP1           | 14q32.33       | 0.303179 | 1.46E-09 | 2.60E-08 |
| CPM             | 12q15          | 0.303143 | 1.46E-09 | 2.61E-08 |
| CILP2           | 19p13.11       | -0.3031  | 1.47E-09 | 2.63E-08 |
| IRF2            | 4q35.1         | 0.303072 | 1.48E-09 | 2.63E-08 |
| VPS13D          | 1p36.22-p36.21 | 0.302997 | 1.49E-09 | 2.66E-08 |
| RHOQ            | 2p21           | -0.30297 | 1.50E-09 | 2.66E-08 |
| VAPB            | 20q13.32       | -0.30284 | 1.52E-09 | 2.71E-08 |
| ANKHD1-EIF4EBP3 | 5q31.3         | 0.302777 | 1.53E-09 | 2.73E-08 |
| PHF14           | 7p21.3         | -0.30272 | 1.55E-09 | 2.75E-08 |
| PRKRIP1         | 7q22.1         | -0.30271 | 1.55E-09 | 2.75E-08 |
| ALAS1           | 3p21.2         | 0.302678 | 1.55E-09 | 2.75E-08 |
| RNF216P1        | 7p22.1         | -0.30254 | 1.58E-09 | 2.80E-08 |
| KIF13B          | 8p12           | 0.30254  | 1.58E-09 | 2.80E-08 |
| MYORG           | 9p13.3         | 0.30246  | 1.60E-09 | 2.83E-08 |
| BRD7            | 16q12.1        | -0.30245 | 1.60E-09 | 2.83E-08 |
| LACTB           | 15q22.2        | 0.302382 | 1.62E-09 | 2.85E-08 |
| ACTR3C          | 7q36.1         | -0.30235 | 1.62E-09 | 2.86E-08 |
| ZNF3            | 7q22.1         | -0.30207 | 1.68E-09 | 2.96E-08 |
| DUOX2           | 15q21.1        | 0.302001 | 1.70E-09 | 2.99E-08 |
| POU2AF1         | 11q23.1        | 0.301994 | 1.70E-09 | 2.99E-08 |
| TMEM150C        | 4q21.22        | -0.30194 | 1.71E-09 | 3.00E-08 |
| TOR4A           | 9q34.3         | 0.301894 | 1.72E-09 | 3.02E-08 |
| ATG4B           | 2q37.3         | -0.30189 | 1.72E-09 | 3.02E-08 |
| TTC25           | 17q21.2        | -0.30179 | 1.74E-09 | 3.06E-08 |
| PCID2           | 13q34          | -0.30175 | 1.75E-09 | 3.07E-08 |
| CWF19L2         | 11q22.3        | -0.30141 | 1.83E-09 | 3.20E-08 |
| CRK             | 17p13.3        | 0.301341 | 1.85E-09 | 3.23E-08 |
| KLHL41          | 2q31.1         | -0.30132 | 1.85E-09 | 3.23E-08 |
| PIK3C2B         | 1q32.1         | 0.301199 | 1.88E-09 | 3.28E-08 |
| ZNF133          | 20p11.23       | -0.30116 | 1.89E-09 | 3.30E-08 |
| PQBP1           | Xp11.23        | -0.30106 | 1.92E-09 | 3.34E-08 |
| FKBP10          | 17q21.2        | -0.30096 | 1.94E-09 | 3.38E-08 |
| FBXO17          | 19q13.2        | -0.30092 | 1.95E-09 | 3.39E-08 |
| PRPF40B         | 12q13.12       | -0.30083 | 1.97E-09 | 3.43E-08 |
| TES             | 7q31.2         | -0.30083 | 1.97E-09 | 3.43E-08 |
| GBA2            | 9p13.3         | 0.3008   | 1.98E-09 | 3.44E-08 |
| CEP112          | 17q24.1        | -0.30068 | 2.01E-09 | 3.49E-08 |
| PDCD5           | 19q13.11       | -0.30067 | 2.02E-09 | 3.49E-08 |

|           |               |          |          |          |
|-----------|---------------|----------|----------|----------|
| DDX60L    | 4q32.3        | 0.300654 | 2.02E-09 | 3.49E-08 |
| FGF18     | 5q35.1        | -0.30064 | 2.02E-09 | 3.50E-08 |
| PPIE      | 1p34.2        | -0.30057 | 2.04E-09 | 3.53E-08 |
| SOGA3     | 6q22.33       | -0.30055 | 2.05E-09 | 3.53E-08 |
| ADH6      | 4q23          | 0.300527 | 2.05E-09 | 3.54E-08 |
| BTNL3     | 5q35.3        | 0.300491 | 2.06E-09 | 3.55E-08 |
| TPMT      | 6p22.3        | 0.300457 | 2.07E-09 | 3.56E-08 |
| SHISA6    | 17p12         | -0.30046 | 2.07E-09 | 3.56E-08 |
| TNFRSF12A | 16p13.3       | -0.30032 | 2.11E-09 | 3.62E-08 |
| TAZ       | Xq28          | -0.30027 | 2.12E-09 | 3.64E-08 |
| DLG5-AS1  | 10q22.3       | -0.30023 | 2.13E-09 | 3.66E-08 |
| GMPPB     | 3p21.31       | 0.300211 | 2.14E-09 | 3.66E-08 |
| CES1P1    | 16q12.2       | -0.30021 | 2.14E-09 | 3.66E-08 |
| RPN2      | 20q11.23      | -0.30015 | 2.15E-09 | 3.68E-08 |
| EZR       | 6q25.3        | 0.300116 | 2.16E-09 | 3.70E-08 |
| DPY30     | 2p22.3        | -0.29993 | 2.22E-09 | 3.78E-08 |
| TAF13     | 1p13.3        | 0.299895 | 2.23E-09 | 3.80E-08 |
| SLC39A2   | 14q11.2       | -0.29983 | 2.25E-09 | 3.83E-08 |
| YWHAB     | 20q13.12      | -0.29976 | 2.26E-09 | 3.86E-08 |
| MAMSTR    | 19q13.33      | -0.29974 | 2.27E-09 | 3.86E-08 |
| TMEM54    | 1p35.1        | 0.299728 | 2.27E-09 | 3.87E-08 |
| ZNF335    | 20q13.12      | -0.29972 | 2.28E-09 | 3.87E-08 |
| SLC6A8    | Xq28          | 0.299628 | 2.30E-09 | 3.91E-08 |
| HSF2      | 6q22.31       | -0.29961 | 2.31E-09 | 3.92E-08 |
| CETN2     | Xq28          | -0.2995  | 2.34E-09 | 3.97E-08 |
| CLMN      | 14q32.13      | 0.299388 | 2.38E-09 | 4.02E-08 |
| FAM200A   | 7q22.1        | -0.29936 | 2.38E-09 | 4.03E-08 |
| HPS4      | 22q12.1       | -0.29918 | 2.44E-09 | 4.12E-08 |
| C1ORF210  | 1p34.2        | 0.299181 | 2.44E-09 | 4.12E-08 |
| PAX5      | 9p13.2        | 0.29904  | 2.48E-09 | 4.19E-08 |
| AGBL5     | 2p23.3        | -0.299   | 2.50E-09 | 4.21E-08 |
|           | 3-Mar 5q23.2  | 0.298921 | 2.52E-09 | 4.25E-08 |
| TSPYL2    | Xp11.22       | -0.29884 | 2.55E-09 | 4.29E-08 |
| LZTS3     | 20p13         | -0.2988  | 2.56E-09 | 4.31E-08 |
| ZDHHC9    | Xq26.1        | -0.29875 | 2.58E-09 | 4.33E-08 |
| NUMB      | 14q24.2-q24.3 | 0.298669 | 2.60E-09 | 4.37E-08 |
| HOMER3    | 19p13.11      | -0.29862 | 2.62E-09 | 4.40E-08 |
| RNF216    | 7p22.1        | -0.29859 | 2.63E-09 | 4.41E-08 |
| C1ORF115  | 1q41          | 0.298544 | 2.65E-09 | 4.43E-08 |
| IQGAP1    | 15q26.1       | 0.298541 | 2.65E-09 | 4.43E-08 |
| PPP1R3D   | 20q13.33      | -0.2985  | 2.66E-09 | 4.45E-08 |
| NCOR1     | 17p12-p11.2   | 0.298499 | 2.66E-09 | 4.45E-08 |
| TSPAN6    | Xq22.1        | -0.29845 | 2.68E-09 | 4.47E-08 |
| ANXA9     | 1q21.3        | -0.2984  | 2.70E-09 | 4.50E-08 |
| ACVR2B    | 3p22.2        | -0.29839 | 2.70E-09 | 4.50E-08 |
| PPARA     | 22q13.31      | 0.298346 | 2.71E-09 | 4.52E-08 |
| XPO5      | 6p21.1        | -0.29808 | 2.81E-09 | 4.67E-08 |
| E2F2      | 1p36.12       | 0.298016 | 2.83E-09 | 4.71E-08 |
| CCDC167   | 6p21.2        | -0.29798 | 2.84E-09 | 4.72E-08 |
| RNF4      | 4p16.3        | 0.297975 | 2.85E-09 | 4.72E-08 |
| PPARGC1B  | 5q32          | 0.297952 | 2.85E-09 | 4.73E-08 |
| H2AFJ     | 12p12.3       | -0.29785 | 2.89E-09 | 4.79E-08 |
| WASHC2A   | 10q11.23      | 0.297842 | 2.89E-09 | 4.79E-08 |
| SPATA33   | 16q24.3       | -0.29784 | 2.90E-09 | 4.79E-08 |
| NR4A2     | 2q24.1        | 0.297808 | 2.91E-09 | 4.80E-08 |
| MACC1     | 7p21.1        | -0.29771 | 2.94E-09 | 4.86E-08 |
| TNFAIP8   | 5q23.1        | 0.29767  | 2.96E-09 | 4.88E-08 |
| FOXQ1     | 6p25.3        | -0.29756 | 3.00E-09 | 4.95E-08 |

|           |                |          |          |          |
|-----------|----------------|----------|----------|----------|
| MPHOSPH10 | 2p13.3         | -0.29755 | 3.00E-09 | 4.95E-08 |
| PACSIN3   | 11p11.2        | -0.2974  | 3.06E-09 | 5.04E-08 |
| CEP68     | 2p14           | -0.2972  | 3.14E-09 | 5.17E-08 |
| LSM8      | 7q31.31        | -0.29713 | 3.17E-09 | 5.20E-08 |
| DACH1     | 13q21.33       | -0.29708 | 3.19E-09 | 5.23E-08 |
| GABRP     | 5q35.1         | 0.297081 | 3.19E-09 | 5.23E-08 |
| KRT37     | 17q21.2        | -0.29707 | 3.19E-09 | 5.23E-08 |
| STK17B    | 2q32.3         | 0.297071 | 3.19E-09 | 5.23E-08 |
| EDEM1     | 3p26.1         | 0.296964 | 3.24E-09 | 5.30E-08 |
| CIDEC     | 3p25.3         | 0.29695  | 3.24E-09 | 5.30E-08 |
| SSBP2     | 5q14.1         | 0.296869 | 3.28E-09 | 5.35E-08 |
| VPS72     | 1q21.3         | -0.29683 | 3.29E-09 | 5.37E-08 |
| FAM86C1   | 11q13.4        | -0.2968  | 3.30E-09 | 5.38E-08 |
| SETD7     | 4q31.1         | 0.296802 | 3.30E-09 | 5.38E-08 |
| CTNNA2    | 2p12           | -0.29672 | 3.34E-09 | 5.43E-08 |
| NKAP      | Xq24           | -0.29666 | 3.36E-09 | 5.47E-08 |
| C2ORF15   | 2q11.2         | -0.29665 | 3.37E-09 | 5.48E-08 |
| ZMIZ2     | 7p13           | -0.29663 | 3.37E-09 | 5.48E-08 |
| GIPR      | 19q13.32       | 0.296583 | 3.40E-09 | 5.51E-08 |
| SLC19A3   | 2q36.3         | -0.29654 | 3.42E-09 | 5.53E-08 |
| FAM122C   | Xq26.3         | -0.29654 | 3.42E-09 | 5.53E-08 |
| ZNF7      | 8q24.3         | -0.29653 | 3.42E-09 | 5.53E-08 |
| PLA2G15   | 16q22.1        | -0.29651 | 3.43E-09 | 5.55E-08 |
| IFRD1     | 7q31.1         | -0.29645 | 3.46E-09 | 5.59E-08 |
| CASC4     | 15q15.3        | 0.296379 | 3.49E-09 | 5.63E-08 |
| LYRM4     | 6p25.1         | -0.29636 | 3.49E-09 | 5.64E-08 |
| FAM120A   | 9q22.31        | 0.29635  | 3.50E-09 | 5.64E-08 |
| ZNF830    | 17q12          | -0.29627 | 3.54E-09 | 5.70E-08 |
| STXBP5    | 6q24.3         | 0.296201 | 3.56E-09 | 5.74E-08 |
| FAM192A   | 16q13          | -0.29617 | 3.58E-09 | 5.75E-08 |
| ZNF250    | 8q24.3         | -0.29608 | 3.62E-09 | 5.82E-08 |
| ASS1      | 9q34.11        | 0.295952 | 3.68E-09 | 5.91E-08 |
| TMOD3     | 15q21.2        | 0.295939 | 3.69E-09 | 5.91E-08 |
| TM9SF4    | 20q11.21       | -0.29592 | 3.69E-09 | 5.92E-08 |
| TTC27     | 2p22.3         | -0.29582 | 3.74E-09 | 5.99E-08 |
| BANF1     | 11q13.1        | -0.2958  | 3.75E-09 | 6.01E-08 |
| MARVELD2  | 5q13.2         | 0.295731 | 3.78E-09 | 6.05E-08 |
| GCM1      | 6p12.1         | -0.2956  | 3.84E-09 | 6.14E-08 |
| NPTX2     | 7q22.1         | -0.29558 | 3.86E-09 | 6.16E-08 |
| FAM160A1  | 4q31.3         | 0.295542 | 3.87E-09 | 6.18E-08 |
| SMARCAL1  | 2q35           | -0.29553 | 3.88E-09 | 6.19E-08 |
| MYL12A    | 18p11.31       | 0.295518 | 3.89E-09 | 6.19E-08 |
| DGAT2     | 11q13.5        | -0.29546 | 3.91E-09 | 6.23E-08 |
| WDR92     | 2p14           | -0.29542 | 3.94E-09 | 6.26E-08 |
| GALNT3    | 2q24.3         | 0.295343 | 3.97E-09 | 6.32E-08 |
| SLC4A1AP  | 2p23.3         | -0.29529 | 4.00E-09 | 6.36E-08 |
| TEAD2     | 19q13.33       | -0.29526 | 4.01E-09 | 6.37E-08 |
| TSPY26P   | 20q11.21       | -0.29511 | 4.09E-09 | 6.48E-08 |
| GDPGP1    | 15q26.1        | 0.295112 | 4.09E-09 | 6.48E-08 |
| FGF3      | 11q13.3        | -0.29508 | 4.11E-09 | 6.50E-08 |
| SLC7A5    | 16q24.2        | -0.29499 | 4.15E-09 | 6.56E-08 |
| NECAP1    | 12p13.31       | 0.294992 | 4.15E-09 | 6.56E-08 |
| KCTD9     | 8p21.2         | 0.294931 | 4.19E-09 | 6.61E-08 |
| TMEM255B  | 13q34          | -0.29486 | 4.22E-09 | 6.66E-08 |
| CTPS2     | Xp22.2         | -0.29485 | 4.23E-09 | 6.66E-08 |
| SYTL2     | 11q14.1        | 0.294846 | 4.23E-09 | 6.67E-08 |
| SIPA1L3   | 19q13.13-q13.2 | 0.294838 | 4.23E-09 | 6.67E-08 |
| MPP1      | Xq28           | -0.29478 | 4.27E-09 | 6.71E-08 |

|           |                    |          |          |          |
|-----------|--------------------|----------|----------|----------|
| CLDN7     | 17p13.1            | 0.294774 | 4.27E-09 | 6.71E-08 |
| HSPA12A   | 10q25.3            | -0.29477 | 4.27E-09 | 6.71E-08 |
| NBPF7     | 1p12               | 0.294762 | 4.27E-09 | 6.71E-08 |
| ZDHHC3    | 3p21.31            | 0.294737 | 4.29E-09 | 6.73E-08 |
| HK1       | 10q22.1            | 0.294609 | 4.36E-09 | 6.83E-08 |
| RELCH     | 18q21.33           | 0.294595 | 4.37E-09 | 6.84E-08 |
| DGLUCY    | 14q32.11           | 0.294486 | 4.43E-09 | 6.93E-08 |
| SDCBP2    | 20p13              | 0.294444 | 4.45E-09 | 6.96E-08 |
| ATP5F1B   | 12q13.3            | 0.294409 | 4.47E-09 | 6.98E-08 |
| TRMT61A   | 14q32.33           | -0.29439 | 4.48E-09 | 7.00E-08 |
| ATOH1     | 4q22.2             | 0.294374 | 4.49E-09 | 7.00E-08 |
| SERPINB8  | 18q22.1            | 0.294205 | 4.59E-09 | 7.15E-08 |
| FRS3      | 6p21.1             | -0.29384 | 4.80E-09 | 7.47E-08 |
| RELL1     | 4p14               | 0.293833 | 4.80E-09 | 7.48E-08 |
| REEP1     | 2p11.2             | -0.29383 | 4.81E-09 | 7.48E-08 |
| TCFL5     | 20q13.33           | -0.29376 | 4.85E-09 | 7.54E-08 |
| AOAH      | 7p14.2             | -0.29374 | 4.86E-09 | 7.55E-08 |
| ZNF599    | 19q13.11           | -0.29371 | 4.88E-09 | 7.57E-08 |
| FOXO3     | 6q21               | -0.29347 | 5.03E-09 | 7.79E-08 |
| GBA3      | 4p15.2             | 0.293443 | 5.05E-09 | 7.81E-08 |
| FEZF1     | 7q31.32            | 0.293419 | 5.06E-09 | 7.83E-08 |
| COLEC11   | 2p25.3             | -0.2934  | 5.08E-09 | 7.85E-08 |
| GALNT1    | 18q12.2            | 0.293343 | 5.11E-09 | 7.89E-08 |
| GALNTL6   | 4q34.1             | 0.293285 | 5.15E-09 | 7.95E-08 |
| ANKRD46   | 8q22.3             | -0.29323 | 5.18E-09 | 7.99E-08 |
| PLTP      | 20q13.12           | -0.29321 | 5.20E-09 | 8.01E-08 |
| SLC25A14  | Xq26.1             | -0.29321 | 5.20E-09 | 8.01E-08 |
| LINC00261 | 20p11.21           | 0.293182 | 5.21E-09 | 8.02E-08 |
| DSC2      | 18q12.1            | 0.293091 | 5.27E-09 | 8.11E-08 |
| FUT8      | 14q23.3            | 0.293033 | 5.31E-09 | 8.16E-08 |
| ZNF570    | 19q13.12           | -0.29294 | 5.37E-09 | 8.25E-08 |
| TM7SF2    | 11q13.1            | -0.29286 | 5.43E-09 | 8.32E-08 |
| PPP1R2    | 3q29               | -0.29286 | 5.43E-09 | 8.32E-08 |
| PCDH19    | Xq22.1             | -0.29281 | 5.46E-09 | 8.36E-08 |
| MIA2      | 14q21.1            | 0.292775 | 5.48E-09 | 8.40E-08 |
| VPS37B    | 12q24.31           | 0.292732 | 5.51E-09 | 8.44E-08 |
| WBP1      | 2p13.1             | -0.29268 | 5.55E-09 | 8.49E-08 |
| C2CD4A    | 15q22.2            | 0.292606 | 5.60E-09 | 8.56E-08 |
| ZBTB2     | 6q25.1             | -0.29249 | 5.68E-09 | 8.67E-08 |
| LGALS3    | 14q22.3            | 0.292449 | 5.71E-09 | 8.71E-08 |
| TCEAL4    | Xq22.2             | -0.29243 | 5.72E-09 | 8.72E-08 |
| PJKK      | 2q31.2             | -0.29242 | 5.73E-09 | 8.73E-08 |
| SYNJ2BP   | 14q24.2            | 0.292409 | 5.74E-09 | 8.74E-08 |
| XRCC5     | 2q35               | -0.29234 | 5.79E-09 | 8.81E-08 |
| AVPI1     | 10q24.2            | 0.292252 | 5.85E-09 | 8.90E-08 |
| STC2      | 5q35.2             | -0.29218 | 5.91E-09 | 8.97E-08 |
| SLC6A14   | Xq23               | 0.292094 | 5.97E-09 | 9.06E-08 |
| NT5E      | 6q14.3             | 0.292067 | 5.99E-09 | 9.08E-08 |
| SLC6A7    | 5q32               | 0.29206  | 6.00E-09 | 9.08E-08 |
| SLC31A1   | 9q32               | 0.291948 | 6.08E-09 | 9.20E-08 |
| CCT4      | 2p15               | -0.29189 | 6.12E-09 | 9.26E-08 |
| AKR7L     | 1p36.13 1p35-p36.1 | 0.291879 | 6.13E-09 | 9.27E-08 |
| STX12     | 1p35.3             | 0.29182  | 6.18E-09 | 9.33E-08 |
| ANGEL1    | 14q24.3            | -0.29182 | 6.18E-09 | 9.33E-08 |
| INSR      | 19p13.2            | 0.291783 | 6.21E-09 | 9.36E-08 |
| ANO7      | 2q37.3             | 0.291759 | 6.22E-09 | 9.38E-08 |
| MTMR10    | 15q13.3            | 0.29173  | 6.25E-09 | 9.41E-08 |
| AP5Z1     | 7p22.1             | -0.29169 | 6.28E-09 | 9.44E-08 |

|          |          |          |          |          |
|----------|----------|----------|----------|----------|
| ABHD12   | 20p11.21 | -0.29163 | 6.32E-09 | 9.51E-08 |
| FAH      | 15q25.1  | -0.29152 | 6.42E-09 | 9.64E-08 |
| TBPL1    | 6q23.2   | -0.29151 | 6.42E-09 | 9.64E-08 |
| TM4SF4   | 3q25.1   | 0.291489 | 6.44E-09 | 9.66E-08 |
| CLCN7    | 16p13.3  | -0.29147 | 6.45E-09 | 9.67E-08 |
| GZMB     | 14q12    | -0.29145 | 6.47E-09 | 9.70E-08 |
| MUC6     | 11p15.5  | 0.291414 | 6.50E-09 | 9.73E-08 |
| ATP9A    | 20q13.2  | -0.29139 | 6.52E-09 | 9.75E-08 |
| ZBTB10   | 8q21.13  | -0.29119 | 6.68E-09 | 9.99E-08 |
| WDR75    | 2q32.2   | -0.29098 | 6.86E-09 | 1.02E-07 |
| ARHGEF16 | 1p36.32  | 0.290829 | 6.99E-09 | 1.04E-07 |
| DLST     | 14q24.3  | 0.29077  | 7.04E-09 | 1.05E-07 |
| MEP1B    | 18q12.1  | 0.290654 | 7.14E-09 | 1.06E-07 |
| PIP4K2B  | 17q12    | -0.29061 | 7.18E-09 | 1.07E-07 |
| WDR53    | 3q29     | -0.29049 | 7.29E-09 | 1.08E-07 |
| GOLGA3   | 12q24.33 | 0.290489 | 7.29E-09 | 1.08E-07 |
| NCKAP5L  | 12q13.12 | -0.29046 | 7.31E-09 | 1.09E-07 |
| CES2     | 16q22.1  | 0.290343 | 7.42E-09 | 1.10E-07 |
| POLR2C   | 16q21    | -0.29025 | 7.51E-09 | 1.11E-07 |
| MTERF3   | 8q22.1   | -0.29003 | 7.71E-09 | 1.14E-07 |
| DPY19L4  | 8q22.1   | -0.28991 | 7.83E-09 | 1.16E-07 |
| ROPN1B   | 3q21.2   | 0.289831 | 7.91E-09 | 1.17E-07 |
| DPF3     | 14q24.2  | 0.289652 | 8.08E-09 | 1.19E-07 |
| NOL10    | 2p25.1   | -0.28965 | 8.08E-09 | 1.19E-07 |
| INAVA    | 1q32.1   | 0.289637 | 8.10E-09 | 1.19E-07 |
| METTL22  | 16p13.2  | -0.28964 | 8.10E-09 | 1.19E-07 |
| PREB     | 2p23.3   | -0.28963 | 8.10E-09 | 1.19E-07 |
| JOSD1    | 22q13.1  | 0.289563 | 8.17E-09 | 1.20E-07 |
| CLSTN2   | 3q23     | -0.28956 | 8.18E-09 | 1.20E-07 |
| TFAP4    | 16p13.3  | -0.28953 | 8.21E-09 | 1.21E-07 |
| WTIP     | 19q13.11 | -0.28942 | 8.31E-09 | 1.22E-07 |
| ITLN1    | 1q23.3   | 0.289322 | 8.42E-09 | 1.24E-07 |
| PXN      | 12q24.23 | 0.289264 | 8.48E-09 | 1.24E-07 |
| IRF6     | 1q32.2   | 0.289261 | 8.48E-09 | 1.24E-07 |
| MAGEA11  | Xq28     | -0.28918 | 8.57E-09 | 1.26E-07 |
| ANKRD19P | 9q22.31  | -0.28913 | 8.62E-09 | 1.26E-07 |
| NDUFAF7  | 2p22.2   | -0.2891  | 8.66E-09 | 1.27E-07 |
| COX19    | 7p22.3   | -0.28909 | 8.67E-09 | 1.27E-07 |
| TSN      | 2q14.3   | -0.28902 | 8.73E-09 | 1.28E-07 |
| CCT7     | 2p13.2   | -0.28886 | 8.91E-09 | 1.30E-07 |
| PACC1    | 1q32.3   | -0.28865 | 9.14E-09 | 1.33E-07 |
| SERPINA7 | Xq22.3   | -0.2886  | 9.20E-09 | 1.34E-07 |
| KRT15    | 17q21.2  | -0.28855 | 9.26E-09 | 1.35E-07 |
| C7ORF50  | 7p22.3   | -0.28851 | 9.30E-09 | 1.36E-07 |
| ZNF440   | 19p13.2  | 0.288486 | 9.33E-09 | 1.36E-07 |
| ADSL     | 22q13.1  | -0.28849 | 9.33E-09 | 1.36E-07 |
| TAF6     | 7q22.1   | -0.28848 | 9.34E-09 | 1.36E-07 |
| TFF3     | 21q22.3  | 0.288408 | 9.42E-09 | 1.37E-07 |
| SLC18B1  | 6q23.2   | 0.288338 | 9.50E-09 | 1.38E-07 |
| ISY1     | 3q21.3   | -0.28834 | 9.50E-09 | 1.38E-07 |
| MED20    | 6p21.1   | -0.28832 | 9.52E-09 | 1.38E-07 |
| ANKRD13C | 1p31.1   | 0.288299 | 9.55E-09 | 1.38E-07 |
| GTDC1    | 2q22.3   | -0.28828 | 9.57E-09 | 1.38E-07 |
| PRR19    | 19q13.2  | -0.28817 | 9.70E-09 | 1.40E-07 |
| PXMP4    | 20q11.22 | -0.28813 | 9.75E-09 | 1.41E-07 |
| CDKN1A   | 6p21.2   | 0.287939 | 9.98E-09 | 1.44E-07 |
| BPNT1    | 1q41     | 0.287933 | 9.99E-09 | 1.44E-07 |
| CHST14   | 15q15.1  | -0.28792 | 1.00E-08 | 1.44E-07 |

|           |                   |          |          |          |
|-----------|-------------------|----------|----------|----------|
| PLA2G2A   | 1p36.13           | 0.287892 | 1.00E-08 | 1.44E-07 |
| PIPOX     | 17q11.2           | -0.28789 | 1.00E-08 | 1.44E-07 |
| GSR       | 8p12              | 0.287885 | 1.00E-08 | 1.44E-07 |
| HEPACAM2  | 7q21.2            | 0.287882 | 1.00E-08 | 1.44E-07 |
| SMAD2     | 18q21.1           | 0.287853 | 1.01E-08 | 1.45E-07 |
| TLE2      | 19p13.3           | -0.28765 | 1.03E-08 | 1.48E-07 |
| WNT10A    | 2q35              | -0.28765 | 1.03E-08 | 1.48E-07 |
| CENPP     | 9q22.31           | -0.28762 | 1.04E-08 | 1.49E-07 |
| LRRC49    | 15q23             | -0.28762 | 1.04E-08 | 1.49E-07 |
| TATDN1    | 8q24.13           | -0.28757 | 1.04E-08 | 1.49E-07 |
| PRAF2     | Xp11.23           | -0.28746 | 1.06E-08 | 1.51E-07 |
| CLCA4     | 1p22.3            | 0.287416 | 1.06E-08 | 1.52E-07 |
| GPC2      | 7q22.1            | -0.28739 | 1.07E-08 | 1.52E-07 |
| ZC3H8     | 2q14.1            | -0.28727 | 1.08E-08 | 1.55E-07 |
| MTHFD1L   | 6q25.1            | -0.28725 | 1.09E-08 | 1.55E-07 |
| DLX4      | 17q21.33          | -0.28694 | 1.13E-08 | 1.61E-07 |
| TUBB3     | 16q24.3           | -0.28683 | 1.14E-08 | 1.63E-07 |
| GDF10     | 10q11.22          | -0.28672 | 1.16E-08 | 1.65E-07 |
| ABAT      | 16p13.2           | -0.2867  | 1.16E-08 | 1.65E-07 |
| ASPSCR1   | 17q25.3           | -0.28651 | 1.19E-08 | 1.69E-07 |
| ZNF461    | 19q13.12          | -0.28637 | 1.21E-08 | 1.72E-07 |
| CEMIP2    | 9q21.13           | 0.286302 | 1.22E-08 | 1.73E-07 |
| SLC25A36  | 3q23              | -0.28628 | 1.22E-08 | 1.73E-07 |
| XK        | Xp21.1            | 0.286179 | 1.24E-08 | 1.75E-07 |
| C11ORF58  | 11p15.2           | -0.28616 | 1.24E-08 | 1.76E-07 |
| WIPI2     | 7p22.1            | -0.28606 | 1.25E-08 | 1.78E-07 |
| COL2A1    | 12q13.11          | -0.28604 | 1.26E-08 | 1.78E-07 |
| C9ORF43   | 9q32              | -0.28599 | 1.27E-08 | 1.79E-07 |
| BCAM      | 19q13.32          | -0.28597 | 1.27E-08 | 1.79E-07 |
| CDC42SE2  | 5q31.1            | 0.28589  | 1.28E-08 | 1.81E-07 |
| PTPRO     | 12p12.3 12p13-p12 | -0.28585 | 1.29E-08 | 1.82E-07 |
| NIP7      | 16q22.1           | -0.28569 | 1.31E-08 | 1.85E-07 |
| DUSP28    | 2q37.3            | -0.28568 | 1.31E-08 | 1.85E-07 |
| ZIC2      | 13q32.3           | 0.285638 | 1.32E-08 | 1.86E-07 |
| IER5      | 1q25.3            | 0.285576 | 1.33E-08 | 1.87E-07 |
| NIBAN2    | 9q34.11           | 0.285542 | 1.34E-08 | 1.88E-07 |
| CAP1      | 1p34.2            | 0.28553  | 1.34E-08 | 1.88E-07 |
| C3ORF70   | 3q27.2            | 0.285509 | 1.34E-08 | 1.88E-07 |
| HSPBAP1   | 3q21.1            | -0.2854  | 1.36E-08 | 1.91E-07 |
| SFT2D3    | 2q14.3            | -0.28535 | 1.37E-08 | 1.92E-07 |
| RNF152    | 18q21.33          | 0.285348 | 1.37E-08 | 1.92E-07 |
| MED10     | 5p15.31           | -0.28534 | 1.37E-08 | 1.92E-07 |
| HSPE1     | 2q33.1            | -0.28533 | 1.37E-08 | 1.92E-07 |
| CCDC102A  | 16q21             | -0.28503 | 1.42E-08 | 1.99E-07 |
| NNT       | 5p12              | 0.284918 | 1.44E-08 | 2.01E-07 |
| TXK       | 4p12              | 0.284856 | 1.45E-08 | 2.03E-07 |
| YIPF5     | 5q31.3            | 0.284856 | 1.45E-08 | 2.03E-07 |
| RABEPK    | 9q33.3            | -0.28482 | 1.46E-08 | 2.03E-07 |
| HSD17B11  | 4q22.1            | 0.284686 | 1.48E-08 | 2.07E-07 |
| PUS10     | 2p16.1-p15        | -0.28463 | 1.49E-08 | 2.08E-07 |
| SSTR5-AS1 | 16p13.3           | 0.284617 | 1.50E-08 | 2.08E-07 |
| PLCE1     | 10q23.33          | 0.284577 | 1.50E-08 | 2.09E-07 |
| HOXD11    | 2q31.1            | -0.28439 | 1.54E-08 | 2.14E-07 |
| DHRS2     | 14q11.2           | -0.28438 | 1.54E-08 | 2.14E-07 |
| CLDN18    | 3q22.3            | 0.284343 | 1.55E-08 | 2.14E-07 |
| FAM228B   | 2p23.3            | -0.28434 | 1.55E-08 | 2.14E-07 |
| LINC00930 | 15q26.1           | 0.284337 | 1.55E-08 | 2.14E-07 |
| LRRN4     | 20p12.3           | -0.2843  | 1.55E-08 | 2.15E-07 |

|             |                 |          |          |          |
|-------------|-----------------|----------|----------|----------|
| ARHGAP32    | 11q24.3         | 0.284231 | 1.57E-08 | 2.17E-07 |
| CDK4        | 12q14.1         | -0.28423 | 1.57E-08 | 2.17E-07 |
| HSPH1       | 13q12.3         | -0.28421 | 1.57E-08 | 2.17E-07 |
| TLR3        | 4q35.1          | 0.284013 | 1.61E-08 | 2.22E-07 |
| AKAP8L      | 19p13.12        | -0.28391 | 1.63E-08 | 2.25E-07 |
| UTP6        | 17q11.2         | -0.28388 | 1.64E-08 | 2.25E-07 |
| SP1         | 12q13.13        | 0.283752 | 1.66E-08 | 2.29E-07 |
| RBP2        | 3q23            | -0.28371 | 1.67E-08 | 2.30E-07 |
| CENPBD1     | 16q24.3         | -0.28358 | 1.70E-08 | 2.33E-07 |
| MRE11       | 11q21           | -0.28351 | 1.71E-08 | 2.35E-07 |
| GSS         | 20q11.22        | -0.28349 | 1.71E-08 | 2.35E-07 |
| SERPINI1    | 3q26.1          | -0.28344 | 1.72E-08 | 2.37E-07 |
| RUBCNL      | 13q14.13        | -0.28341 | 1.73E-08 | 2.37E-07 |
| ZNF358      | 19p13.2         | -0.28331 | 1.75E-08 | 2.40E-07 |
| IL1RN       | 2q14.1          | 0.283302 | 1.75E-08 | 2.40E-07 |
| ZSCAN2      | 15q25.2         | -0.28326 | 1.76E-08 | 2.41E-07 |
| CA14        | 1q21.2          | 0.283226 | 1.77E-08 | 2.42E-07 |
| RYK         | 3q22.2          | -0.28317 | 1.78E-08 | 2.43E-07 |
| SPACA3      | 17q11.2         | -0.28311 | 1.79E-08 | 2.45E-07 |
| SEM1        | 7q21.3          | -0.28305 | 1.81E-08 | 2.47E-07 |
| CBFA2T2     | 20q11.21-q11.22 | -0.28298 | 1.82E-08 | 2.49E-07 |
| ZNF252P-AS1 | 8q24.3          | -0.28291 | 1.84E-08 | 2.51E-07 |
| SLC35A4     | 5q31.3          | 0.282775 | 1.87E-08 | 2.54E-07 |
| SLC39A7     | 6p21.32         | 0.282768 | 1.87E-08 | 2.54E-07 |
| SLC30A2     | 1p36.11         | -0.28272 | 1.88E-08 | 2.56E-07 |
| PEX16       | 11p11.2         | -0.28271 | 1.88E-08 | 2.56E-07 |
| PAX9        | 14q13.3         | 0.282683 | 1.89E-08 | 2.57E-07 |
| LITAF       | 16p13.13        | 0.282609 | 1.90E-08 | 2.59E-07 |
| STK36       | 2q35            | -0.28256 | 1.92E-08 | 2.60E-07 |
| CCDC85C     | 14q32.2         | 0.282336 | 1.97E-08 | 2.67E-07 |
| TMPRSS2     | 21q22.3         | 0.282295 | 1.98E-08 | 2.68E-07 |
| TVP23B      | 17p11.2         | 0.282246 | 1.99E-08 | 2.69E-07 |
| PPP3CA      | 4q24            | 0.282076 | 2.03E-08 | 2.75E-07 |
| CARS2       | 13q34           | -0.28203 | 2.04E-08 | 2.76E-07 |
| DZANK1      | 20p11.23        | -0.282   | 2.05E-08 | 2.77E-07 |
| POLR2K      | 8q22.2          | -0.28197 | 2.06E-08 | 2.78E-07 |
| NIT2        | 3q12.2          | -0.28196 | 2.06E-08 | 2.78E-07 |
| USPL1       | 13q12.3         | -0.28188 | 2.08E-08 | 2.80E-07 |
| RBBP8NL     | 20q13.33        | -0.28178 | 2.10E-08 | 2.84E-07 |
| SECTM1      | 17q25.3         | 0.281588 | 2.15E-08 | 2.90E-07 |
| CKMT2       | 5q14.1          | -0.28159 | 2.15E-08 | 2.90E-07 |
| ZFP91       | 11q12.1         | 0.281574 | 2.16E-08 | 2.90E-07 |
| NPTXR       | 22q13.1         | -0.28155 | 2.16E-08 | 2.91E-07 |
| TPM2        | 9p13.3          | -0.28154 | 2.16E-08 | 2.91E-07 |
| CCDC50      | 3q28            | -0.28147 | 2.18E-08 | 2.93E-07 |
| LCN2        | 9q34.11         | 0.281413 | 2.20E-08 | 2.95E-07 |
| DDAH1       | 1p22.3          | 0.281223 | 2.25E-08 | 3.01E-07 |
| HSPA4L      | 4q28.1          | 0.281028 | 2.30E-08 | 3.08E-07 |
| CALML4      | 15q23           | 0.28096  | 2.32E-08 | 3.11E-07 |
| CCT6P1      | 7q11.21         | -0.28093 | 2.33E-08 | 3.12E-07 |
| SLC29A1     | 6p21.1          | -0.28093 | 2.33E-08 | 3.12E-07 |
| LRP11       | 6q25.1          | -0.28084 | 2.35E-08 | 3.14E-07 |
| PRKAR1B     | 7p22.3          | -0.28065 | 2.41E-08 | 3.21E-07 |
| AGK         | 7q34            | -0.28064 | 2.41E-08 | 3.21E-07 |
| MRPL48      | 11q13.4         | -0.28062 | 2.42E-08 | 3.22E-07 |
| IVNS1ABP    | 1q25.3          | 0.280604 | 2.42E-08 | 3.23E-07 |
| CPA4        | 7q32.2          | -0.28056 | 2.43E-08 | 3.24E-07 |
| SLC25A24    | 1p13.3          | 0.280473 | 2.46E-08 | 3.27E-07 |

|           |          |          |          |          |
|-----------|----------|----------|----------|----------|
| OSBPL7    | 17q21.32 | 0.280399 | 2.48E-08 | 3.30E-07 |
| NFU1      | 2p13.3   | -0.28036 | 2.49E-08 | 3.31E-07 |
| PLXNB2    | 22q13.33 | 0.280352 | 2.49E-08 | 3.31E-07 |
| VENTX     | 10q26.3  | -0.28027 | 2.52E-08 | 3.34E-07 |
| SNRPB2    | 20p12.1  | -0.28026 | 2.52E-08 | 3.35E-07 |
| C18ORF25  | 18q21.1  | 0.280167 | 2.55E-08 | 3.38E-07 |
| CLCN3     | 4q33     | 0.280112 | 2.57E-08 | 3.40E-07 |
| NAT14     | 19q13.42 | -0.28006 | 2.58E-08 | 3.42E-07 |
| VMA21     | Xq28     | -0.27999 | 2.61E-08 | 3.45E-07 |
| SDC4      | 20q13.12 | -0.27998 | 2.61E-08 | 3.45E-07 |
| SUPT20H   | 13q13.3  | -0.27992 | 2.63E-08 | 3.47E-07 |
| DGUOK     | 2p13.1   | -0.27989 | 2.63E-08 | 3.48E-07 |
| TEP1      | 14q11.2  | 0.279859 | 2.65E-08 | 3.49E-07 |
| CWC15     | 11q21    | -0.27978 | 2.67E-08 | 3.52E-07 |
| FOXO3B    | 17p11.2  | -0.27976 | 2.68E-08 | 3.53E-07 |
| PDE4DIP   | 1q21.2   | 0.27973  | 2.69E-08 | 3.54E-07 |
| BCL3      | 19q13.32 | 0.279718 | 2.69E-08 | 3.54E-07 |
| ZNF212    | 7q36.1   | -0.2797  | 2.70E-08 | 3.54E-07 |
| PRKRA     | 2q31.2   | -0.27966 | 2.71E-08 | 3.56E-07 |
| ATP11B    | 3q26.33  | 0.279642 | 2.71E-08 | 3.56E-07 |
| SSTR1     | 14q21.1  | 0.279577 | 2.74E-08 | 3.59E-07 |
| GUCD1     | 22q11.23 | 0.279562 | 2.74E-08 | 3.59E-07 |
| UPF3A     | 13q34    | -0.27949 | 2.76E-08 | 3.62E-07 |
| ANO9      | 11p15.5  | -0.27941 | 2.79E-08 | 3.65E-07 |
| SPATA25   | 20q13.12 | -0.27941 | 2.79E-08 | 3.65E-07 |
| FUT2      | 19q13.33 | 0.279381 | 2.80E-08 | 3.66E-07 |
| AKR7A2    | 1p36.13  | 0.279353 | 2.81E-08 | 3.67E-07 |
| SLITRK6   | 13q31.1  | 0.279258 | 2.84E-08 | 3.71E-07 |
| KLRG2     | 7q34     | -0.27908 | 2.90E-08 | 3.79E-07 |
| LINC00653 | 20p11.23 | -0.27902 | 2.92E-08 | 3.81E-07 |
| PLD1      | 3q26.31  | 0.279013 | 2.92E-08 | 3.81E-07 |
| GRAMD1A   | 19q13.11 | -0.27899 | 2.93E-08 | 3.82E-07 |
| HNF1A     | 12q24.31 | -0.27896 | 2.94E-08 | 3.83E-07 |
| CLDN12    | 7q21.13  | 0.278944 | 2.95E-08 | 3.84E-07 |
| UGT1A10   | 2q37.1   | 0.27886  | 2.98E-08 | 3.87E-07 |
| C2ORF42   | 2p13.3   | -0.27885 | 2.98E-08 | 3.88E-07 |
| AUP1      | 2p13.1   | -0.27873 | 3.02E-08 | 3.93E-07 |
| ZFAS1     | 20q13.13 | -0.27865 | 3.05E-08 | 3.96E-07 |
| CDC42EP2  | 11q13.1  | 0.278637 | 3.06E-08 | 3.97E-07 |
| SMPD3     | 16q22.1  | 0.278633 | 3.06E-08 | 3.97E-07 |
| PPT2      | 6p21.32  | -0.2786  | 3.07E-08 | 3.98E-07 |
| TRIM15    | 6p22.1   | 0.27856  | 3.09E-08 | 3.99E-07 |
| REPIN1    | 7q36.1   | -0.27852 | 3.10E-08 | 4.01E-07 |
| FCGRT     | 19q13.33 | -0.2785  | 3.11E-08 | 4.02E-07 |
| ACO1      | 9p21.1   | 0.278475 | 3.12E-08 | 4.03E-07 |
| SPAG4     | 20q11.22 | -0.27832 | 3.17E-08 | 4.10E-07 |
| NCOA4     | 10q11.22 | 0.278278 | 3.19E-08 | 4.12E-07 |
| TSSC4     | 11p15.5  | -0.27824 | 3.20E-08 | 4.13E-07 |
| MCTP2     | 15q26.2  | 0.278233 | 3.21E-08 | 4.13E-07 |
| C12ORF73  | 12q23.3  | -0.27799 | 3.30E-08 | 4.25E-07 |
| FGD1      | Xp11.22  | -0.27781 | 3.37E-08 | 4.34E-07 |
| PERP      | 6q23.3   | -0.27777 | 3.39E-08 | 4.35E-07 |
| AIP       | 11q13.2  | -0.27768 | 3.42E-08 | 4.40E-07 |
| DDX52     | 17q12    | -0.27765 | 3.43E-08 | 4.41E-07 |
| ADAM17    | 2p25.1   | -0.27759 | 3.46E-08 | 4.44E-07 |
| GPS1      | 17q25.3  | -0.27754 | 3.48E-08 | 4.47E-07 |
| TMED7     | 5q22.3   | 0.277529 | 3.48E-08 | 4.47E-07 |
| GRK3      | 22q12.1  | -0.27752 | 3.49E-08 | 4.47E-07 |



|          |                |          |          |          |
|----------|----------------|----------|----------|----------|
| AKR1B15  | 7q33           | 0.277511 | 3.49E-08 | 4.47E-07 |
| HOXD1    | 2q31.1         | 0.277468 | 3.51E-08 | 4.49E-07 |
| MAFG-DT  | 17q25.3        | -0.27746 | 3.51E-08 | 4.49E-07 |
| SYT7     | 11q12.2        | -0.27745 | 3.52E-08 | 4.49E-07 |
| ELOVL7   | 5q12.1         | 0.277312 | 3.57E-08 | 4.56E-07 |
| ALKBH3   | 11p11.2        | -0.27731 | 3.58E-08 | 4.56E-07 |
| TPK1     | 7q35           | 0.277275 | 3.59E-08 | 4.58E-07 |
| PMFBP1   | 16q22.2        | -0.27719 | 3.63E-08 | 4.62E-07 |
| ARFRP1   | 20q13.33       | -0.27715 | 3.64E-08 | 4.64E-07 |
| VMAC     | 19p13.3        | -0.27714 | 3.65E-08 | 4.65E-07 |
| PRKAA1   | 5p13.1         | 0.277102 | 3.66E-08 | 4.66E-07 |
| KRAS     | 12p12.1        | 0.277064 | 3.68E-08 | 4.68E-07 |
| STPG1    | 1p36.11        | 0.276993 | 3.71E-08 | 4.72E-07 |
| SLC27A2  | 15q21.2        | 0.276904 | 3.75E-08 | 4.76E-07 |
| CTSV     | 9q22.33        | -0.27686 | 3.77E-08 | 4.78E-07 |
| CDC42EP1 | 22q13.1        | 0.276848 | 3.77E-08 | 4.79E-07 |
| STX18    | 4p16.3-p16.2   | 0.276824 | 3.78E-08 | 4.80E-07 |
| PPP2CB   | 8p12           | 0.276795 | 3.80E-08 | 4.81E-07 |
| DNAH14   | 1q42.12        | -0.27638 | 3.99E-08 | 5.04E-07 |
| PRSS50   | 3p21.31        | -0.27635 | 4.00E-08 | 5.06E-07 |
| NXPE1    | 11q23.2        | 0.276299 | 4.03E-08 | 5.09E-07 |
| CTBS     | 1p22.3         | 0.276241 | 4.05E-08 | 5.12E-07 |
| FREM2    | 13q13.3        | -0.27617 | 4.09E-08 | 5.16E-07 |
| CCDC125  | 5q13.2         | 0.276166 | 4.09E-08 | 5.16E-07 |
| NBDY     | Xp11.21        | -0.27603 | 4.16E-08 | 5.24E-07 |
| MEN1     | 11q13.1        | -0.27602 | 4.16E-08 | 5.24E-07 |
| TMEM198  | 2q35           | -0.27597 | 4.18E-08 | 5.27E-07 |
| ST6GAL2  | 2q12.3         | -0.27594 | 4.20E-08 | 5.28E-07 |
| ZNF674   | Xp11.3         | -0.27591 | 4.21E-08 | 5.30E-07 |
| SLC45A2  | 5p13.2         | -0.27586 | 4.24E-08 | 5.32E-07 |
| NAA10    | Xq28           | -0.27585 | 4.24E-08 | 5.33E-07 |
| COA5     | 2q11.2         | -0.27566 | 4.34E-08 | 5.44E-07 |
| SPACA6   | 19q13.41       | -0.27564 | 4.35E-08 | 5.45E-07 |
| SNORA71E | 20q11.23       | -0.27559 | 4.37E-08 | 5.48E-07 |
| ACAD11   | 3q22.1         | -0.27556 | 4.39E-08 | 5.50E-07 |
| UBE2G1   | 17p13.2        | 0.275555 | 4.39E-08 | 5.50E-07 |
| AMER1    | Xq11.2         | -0.27554 | 4.40E-08 | 5.51E-07 |
| RIMKLA   | 1p34.2         | 0.275484 | 4.43E-08 | 5.54E-07 |
| YES1     | 18p11.32       | 0.275303 | 4.52E-08 | 5.65E-07 |
| RREB1    | 6p24.3         | 0.275302 | 4.52E-08 | 5.65E-07 |
| DSN1     | 20q11.23       | -0.27529 | 4.53E-08 | 5.65E-07 |
| BIRC7    | 20q13.33       | -0.27521 | 4.57E-08 | 5.70E-07 |
| NEPRO    | 3q13.2         | -0.27515 | 4.60E-08 | 5.74E-07 |
| ARSJ     | 4q26           | 0.275112 | 4.62E-08 | 5.76E-07 |
| HULC     | 6p24.3         | -0.27511 | 4.62E-08 | 5.76E-07 |
| OASL     | 12q24.31       | 0.275008 | 4.68E-08 | 5.82E-07 |
| DIDO1    | 20q13.33       | -0.27499 | 4.69E-08 | 5.83E-07 |
| MYOF     | 10q23.33       | 0.274906 | 4.74E-08 | 5.89E-07 |
| OIT3     | 10q22.1        | -0.27484 | 4.77E-08 | 5.92E-07 |
| PLA2G4A  | 1q31.1         | 0.274842 | 4.77E-08 | 5.92E-07 |
| MYPN     | 10q21.3        | 0.274822 | 4.78E-08 | 5.93E-07 |
| IFT57    | 3q13.12-q13.13 | -0.27474 | 4.83E-08 | 5.99E-07 |
| COPS7B   | 2q37.1         | -0.27472 | 4.84E-08 | 6.00E-07 |
| CEP164   | 11q23.3        | -0.27459 | 4.91E-08 | 6.09E-07 |
| HAS2     | 8q24.13        | -0.27454 | 4.94E-08 | 6.12E-07 |
| DRAP1    | 11q13.1        | -0.27448 | 4.97E-08 | 6.15E-07 |
| COL17A1  | 10q25.1        | 0.274447 | 5.00E-08 | 6.17E-07 |
| TRPV6    | 7q34           | 0.274445 | 5.00E-08 | 6.17E-07 |

|           |                   |          |          |          |
|-----------|-------------------|----------|----------|----------|
| EFNA5     | 5q21.3            | 0.274405 | 5.02E-08 | 6.20E-07 |
| LINC01622 | 6p25.3            | -0.27436 | 5.05E-08 | 6.23E-07 |
| NAPG      | 18p11.22          | 0.274341 | 5.06E-08 | 6.24E-07 |
| FHL2      | 2q12.2            | 0.274338 | 5.06E-08 | 6.24E-07 |
| ADK       | 10q22.2 10q11-q24 | -0.2743  | 5.08E-08 | 6.26E-07 |
| KBTBD6    | 13q14.11          | -0.27428 | 5.09E-08 | 6.27E-07 |
| ERP27     | 12p12.3           | -0.27423 | 5.12E-08 | 6.30E-07 |
| PIK3AP1   | 10q24.1           | 0.274215 | 5.13E-08 | 6.31E-07 |
| AIRE      | 21q22.3           | -0.27421 | 5.14E-08 | 6.31E-07 |
| SGPP1     | 14q23.2           | 0.27416  | 5.17E-08 | 6.34E-07 |
| MITD1     | 2q11.2            | -0.27416 | 5.17E-08 | 6.34E-07 |
| ISM1      | 20p12.1           | -0.27412 | 5.19E-08 | 6.36E-07 |
| SLC27A4   | 9q34.11           | 0.274094 | 5.20E-08 | 6.38E-07 |
| PSTPIP2   | 18q21.1 tdb7990   | -0.27409 | 5.21E-08 | 6.38E-07 |
| CNP       | 17q21.2           | -0.27396 | 5.28E-08 | 6.47E-07 |
| ARL16     | 17q25.3           | -0.27393 | 5.31E-08 | 6.49E-07 |
| PLEKHA6   | 1q32.1            | 0.273921 | 5.31E-08 | 6.49E-07 |
| SHANK2    | 11q13.3-q13.4     | -0.27386 | 5.35E-08 | 6.54E-07 |
| POLR1D    | 13q12.2           | -0.27369 | 5.45E-08 | 6.66E-07 |
| GTF2F2    | 13q14.12-q14.13   | -0.27359 | 5.52E-08 | 6.73E-07 |
| SERPINB5  | 18q21.33          | 0.273569 | 5.53E-08 | 6.75E-07 |
| ERAP1     | 5q15              | 0.273553 | 5.54E-08 | 6.75E-07 |
| COQ2      | 4q21.22-q21.23    | 0.273538 | 5.55E-08 | 6.76E-07 |
| TIGD7     | 16p13.3           | -0.27348 | 5.59E-08 | 6.80E-07 |
| COG7      | 16p12.2           | 0.273368 | 5.66E-08 | 6.89E-07 |
| NAT1      | 8p22              | 0.27335  | 5.67E-08 | 6.90E-07 |
| RARRES1   | 3q25.32           | 0.273348 | 5.67E-08 | 6.90E-07 |
| RALGAPB   | 20q11.23          | -0.27328 | 5.72E-08 | 6.94E-07 |
| FECH      | 18q21.31          | 0.273247 | 5.74E-08 | 6.97E-07 |
| CPNE9     | 3p25.3            | -0.2731  | 5.84E-08 | 7.08E-07 |
| SS18L1    | 20q13.33          | -0.27309 | 5.84E-08 | 7.09E-07 |
| OSGEPL1   | 2q32.2            | -0.27306 | 5.86E-08 | 7.10E-07 |
| PPP1R14A  | 19q13.2           | -0.273   | 5.91E-08 | 7.16E-07 |
| ZNF606    | 19q13.43          | -0.27294 | 5.95E-08 | 7.20E-07 |
| CCDC92    | 12q24.31          | -0.27294 | 5.95E-08 | 7.20E-07 |
| IPO5      | 13q32.2           | -0.27278 | 6.06E-08 | 7.32E-07 |
| PRR14L    | 22q12.2           | 0.272733 | 6.09E-08 | 7.36E-07 |
| ALDH3B1   | 11q13.2           | 0.272678 | 6.13E-08 | 7.40E-07 |
| SMC5      | 9q21.12           | 0.272618 | 6.17E-08 | 7.45E-07 |
| FAM86C2P  | 11q13.2           | -0.27258 | 6.20E-08 | 7.48E-07 |
| FLJ16779  | 20q13.33          | -0.27257 | 6.21E-08 | 7.48E-07 |
| TP53I13   | 17q11.2           | -0.27256 | 6.21E-08 | 7.48E-07 |
| PEX10     | 1p36.32           | -0.27252 | 6.25E-08 | 7.52E-07 |
| COX10     | 17p12             | 0.272512 | 6.25E-08 | 7.52E-07 |
| USP40     | 2q37.1            | -0.27249 | 6.27E-08 | 7.53E-07 |
| TRIP11    | 14q32.12          | 0.272372 | 6.35E-08 | 7.63E-07 |
| PI4K2B    | 4p15.2            | 0.27237  | 6.35E-08 | 7.63E-07 |
| FAM83C    | 20q11.22          | -0.27236 | 6.36E-08 | 7.64E-07 |
| RNASEH2C  | 11q13.1           | -0.27233 | 6.38E-08 | 7.66E-07 |
| EPHA4     | 2q36.1            | 0.272277 | 6.42E-08 | 7.70E-07 |
| FAM214B   | 9p13.3            | 0.272242 | 6.45E-08 | 7.72E-07 |
| SAMD9L    | 7q21.2            | 0.272212 | 6.47E-08 | 7.75E-07 |
| ZNF280A   | 22q11.22          | -0.2721  | 6.55E-08 | 7.84E-07 |
| IVL       | 1q21.3            | -0.2721  | 6.55E-08 | 7.84E-07 |
| RRP9      | 3p21.2            | -0.27205 | 6.59E-08 | 7.88E-07 |
| TFAP2A    | 6p24.3            | 0.272045 | 6.59E-08 | 7.88E-07 |
| CHST10    | 2q11.2            | -0.27198 | 6.64E-08 | 7.93E-07 |
| LYST      | 1q42.3            | 0.27197  | 6.65E-08 | 7.93E-07 |

|          |          |          |          |          |
|----------|----------|----------|----------|----------|
| ADAM28   | 8p21.2   | 0.271923 | 6.69E-08 | 7.97E-07 |
| ZCCHC2   | 18q21.33 | 0.271893 | 6.71E-08 | 8.00E-07 |
| ACADSB   | 10q26.13 | 0.271722 | 6.84E-08 | 8.15E-07 |
| RIMS3    | 1p34.2   | 0.271702 | 6.86E-08 | 8.16E-07 |
| DNAAF3   | 19q13.42 | 0.271695 | 6.87E-08 | 8.17E-07 |
| CDK5     | 7q36.1   | -0.27167 | 6.89E-08 | 8.18E-07 |
| PM20D2   | 6q15     | -0.27161 | 6.94E-08 | 8.24E-07 |
| DENND1B  | 1q31.3   | 0.271598 | 6.94E-08 | 8.24E-07 |
| PLEKHB2  | 2q21.1   | 0.271582 | 6.96E-08 | 8.25E-07 |
| TUT1     | 11q12.3  | -0.27157 | 6.96E-08 | 8.26E-07 |
| KCTD3    | 1q41     | 0.271524 | 7.00E-08 | 8.30E-07 |
| FAM81A   | 15q22.2  | 0.271519 | 7.01E-08 | 8.30E-07 |
| EYA1     | 8q13.3   | -0.27145 | 7.06E-08 | 8.36E-07 |
| STAMBP   | 2p13.1   | -0.27141 | 7.09E-08 | 8.38E-07 |
| BRD3OS   | 9q34.2   | -0.27141 | 7.09E-08 | 8.38E-07 |
| BCL2L14  | 12p13.2  | 0.271338 | 7.15E-08 | 8.45E-07 |
| SMARCE1  | 17q21.2  | -0.27128 | 7.20E-08 | 8.50E-07 |
| PROSER2  | 10p14    | -0.27124 | 7.23E-08 | 8.54E-07 |
| VPS26C   | 21q22.13 | 0.271124 | 7.33E-08 | 8.65E-07 |
| DHRS12   | 13q14.3  | -0.27104 | 7.41E-08 | 8.73E-07 |
| CBR3     | 21q22.12 | 0.270974 | 7.46E-08 | 8.79E-07 |
| PSEN1    | 14q24.2  | 0.27089  | 7.53E-08 | 8.87E-07 |
| MYT1     | 20q13.33 | -0.27087 | 7.55E-08 | 8.88E-07 |
| ZFP30    | 19q13.12 | -0.27069 | 7.71E-08 | 9.07E-07 |
| FCAMR    | 1q32.1   | 0.270655 | 7.74E-08 | 9.09E-07 |
| LAPTM4B  | 8q22.1   | -0.27063 | 7.76E-08 | 9.12E-07 |
| KDM3B    | 5q31.2   | 0.270554 | 7.83E-08 | 9.19E-07 |
| NCS1     | 9q34.11  | -0.27042 | 7.94E-08 | 9.32E-07 |
| TAF1B    | 2p25.1   | -0.27037 | 7.99E-08 | 9.37E-07 |
| FOSL2    | 2p23.2   | 0.270337 | 8.02E-08 | 9.40E-07 |
| ASB1     | 2q37.3   | -0.27033 | 8.03E-08 | 9.40E-07 |
| DNAJC2   | 7q22.1   | -0.2702  | 8.15E-08 | 9.54E-07 |
| GOLGA4   | 3p22.2   | 0.270105 | 8.24E-08 | 9.64E-07 |
| LGALS9   | 17q11.2  | 0.270051 | 8.29E-08 | 9.69E-07 |
| SLC7A11  | 4q28.3   | 0.270031 | 8.31E-08 | 9.71E-07 |
| CYP3A4   | 7q22.1   | 0.269991 | 8.35E-08 | 9.75E-07 |
| VDR      | 12q13.11 | 0.269936 | 8.40E-08 | 9.80E-07 |
| ZNF419   | 19q13.43 | -0.26992 | 8.42E-08 | 9.82E-07 |
| PGAP2    | 11p15.4  | -0.26991 | 8.43E-08 | 9.82E-07 |
| NUTF2    | 16q22.1  | -0.26985 | 8.48E-08 | 9.88E-07 |
| NECAB3   | 20q11.22 | -0.2698  | 8.53E-08 | 9.93E-07 |
| OSGIN2   | 8q21.3   | -0.26972 | 8.61E-08 | 1.00E-06 |
| ATP13A4  | 3q29     | 0.269668 | 8.66E-08 | 1.01E-06 |
| INSL4    | 9p24.1   | 0.269563 | 8.76E-08 | 1.02E-06 |
| SRSF12   | 6q15     | -0.26955 | 8.78E-08 | 1.02E-06 |
| ANKFY1   | 17p13.2  | 0.269536 | 8.79E-08 | 1.02E-06 |
| C3ORF14  | 3p14.2   | -0.2695  | 8.83E-08 | 1.02E-06 |
| SULT1C2  | 2q12.3   | 0.26945  | 8.88E-08 | 1.03E-06 |
| C11ORF53 | 11q23.1  | 0.269402 | 8.93E-08 | 1.03E-06 |
| PCSK1N   | Xp11.23  | -0.26936 | 8.97E-08 | 1.04E-06 |
| UCHL3    | 13q22.2  | -0.26935 | 8.98E-08 | 1.04E-06 |
| RPL30    | 8q22.2   | -0.2693  | 9.03E-08 | 1.05E-06 |
| FOXD4    | 9p24.3   | 0.269146 | 9.19E-08 | 1.06E-06 |
| HIF1A    | 14q23.2  | 0.269116 | 9.22E-08 | 1.07E-06 |
| SLC66A2  | 18q23    | 0.269114 | 9.22E-08 | 1.07E-06 |
| MTBP     | 8q24.12  | -0.26905 | 9.29E-08 | 1.07E-06 |
| FMR1     | Xq27.3   | -0.26902 | 9.32E-08 | 1.08E-06 |
| CSRNP2   | 12q13.12 | -0.26899 | 9.36E-08 | 1.08E-06 |

|            |                 |          |          |          |
|------------|-----------------|----------|----------|----------|
| ATP5F1EP2  | 13q12.2         | -0.26896 | 9.39E-08 | 1.08E-06 |
| BUD31      | 7q22.1          | -0.26882 | 9.53E-08 | 1.10E-06 |
| IL34       | 16q22.1         | -0.26881 | 9.55E-08 | 1.10E-06 |
| GHDC       | 17q21.2         | -0.26888 | 9.55E-08 | 1.10E-06 |
| LINC01816  | 2p13.3          | -0.26878 | 9.58E-08 | 1.10E-06 |
| PCYT1B     | Xp22.11         | -0.26872 | 9.65E-08 | 1.11E-06 |
| TPM3       | 1q21.3          | 0.268652 | 9.72E-08 | 1.12E-06 |
| ELOC       | 8q21.11         | -0.26861 | 9.76E-08 | 1.12E-06 |
| PMS2       | 7p22.1          | -0.26861 | 9.77E-08 | 1.12E-06 |
| NRXN2      | 11q13.1         | -0.26836 | 1.00E-07 | 1.15E-06 |
| CHCHD10    | 22q11.23        | 0.268343 | 1.01E-07 | 1.15E-06 |
| SUPT3H     | 6p21.1          | -0.26834 | 1.01E-07 | 1.15E-06 |
| RAB11FIP2  | 10q26.11        | -0.26821 | 1.02E-07 | 1.17E-06 |
| NUDT1      | 7p22.3          | -0.26818 | 1.02E-07 | 1.17E-06 |
| KAT2A      | 17q21.2         | -0.26817 | 1.03E-07 | 1.17E-06 |
| LTBP3      | 11q13.1         | -0.26813 | 1.03E-07 | 1.18E-06 |
| HOXD10     | 2q31.1          | -0.26804 | 1.04E-07 | 1.19E-06 |
| ARF5       | 7q32.1          | -0.26803 | 1.04E-07 | 1.19E-06 |
| CBFA2T3    | 16q24.3         | 0.26801  | 1.05E-07 | 1.19E-06 |
| GOLGB1     | 3q13.33         | 0.267979 | 1.05E-07 | 1.20E-06 |
| SYN3       | 22q12.3         | -0.26791 | 1.06E-07 | 1.20E-06 |
| KLRC1      | 12p13.2         | 0.267864 | 1.06E-07 | 1.21E-06 |
| PROX1      | 1q32.3          | -0.26786 | 1.06E-07 | 1.21E-06 |
| ADAM15     | 1q21.3          | 0.267856 | 1.06E-07 | 1.21E-06 |
| COMMD6     | 13q22.2         | -0.26772 | 1.08E-07 | 1.23E-06 |
| MYBPHL     | 1p13.3          | -0.26771 | 1.08E-07 | 1.23E-06 |
| HDAC5      | 17q21.31        | -0.2677  | 1.08E-07 | 1.23E-06 |
| JKAMP      | 14q23.1         | 0.267503 | 1.11E-07 | 1.26E-06 |
| FAM3D      | 3p14.2          | 0.267501 | 1.11E-07 | 1.26E-06 |
| KRT31      | 17q21.2         | -0.26741 | 1.12E-07 | 1.27E-06 |
| STK25      | 2q37.3          | -0.26741 | 1.12E-07 | 1.27E-06 |
| PMS2CL     | 7p22.1          | -0.26735 | 1.13E-07 | 1.27E-06 |
| TSEN2      | 3p25.2          | -0.26723 | 1.14E-07 | 1.29E-06 |
| NRGN       | 11q24.2         | 0.267002 | 1.17E-07 | 1.32E-06 |
| COL9A2     | 1p34.2          | 0.266963 | 1.18E-07 | 1.33E-06 |
| KIF13A     | 6p22.3          | 0.26694  | 1.18E-07 | 1.33E-06 |
| TCP10L2    | 6q27            | -0.26693 | 1.18E-07 | 1.33E-06 |
| BRAT1      | 7p22.3          | -0.26691 | 1.18E-07 | 1.33E-06 |
| RAB5IF     | 20q11.23        | -0.26688 | 1.19E-07 | 1.34E-06 |
| HTR1D      | 1p36.12         | 0.266842 | 1.19E-07 | 1.34E-06 |
| ENY2       | 8q23.1          | -0.26684 | 1.19E-07 | 1.34E-06 |
| DNAJC24    | 11p13           | -0.26681 | 1.20E-07 | 1.35E-06 |
| DPH6       | 15q14           | -0.2668  | 1.20E-07 | 1.35E-06 |
| ARHGEF25   | 12q13.3         | -0.26677 | 1.20E-07 | 1.35E-06 |
| CCDC186    | 10q25.3         | 0.266693 | 1.21E-07 | 1.36E-06 |
| DCUN1D5    | 11q22.3         | -0.26668 | 1.22E-07 | 1.36E-06 |
| PUS3       | 11q24.2         | -0.26657 | 1.23E-07 | 1.38E-06 |
| TDGF1      | 3p21.31         | -0.26649 | 1.24E-07 | 1.39E-06 |
| NT5C2      | 10q24.32-q24.33 | 0.266476 | 1.24E-07 | 1.39E-06 |
| CDC42BPB   | 14q32.32        | 0.266473 | 1.24E-07 | 1.39E-06 |
| CYTH1      | 17q25.3         | 0.266439 | 1.25E-07 | 1.40E-06 |
| RASGRP1    | 15q14           | 0.266438 | 1.25E-07 | 1.40E-06 |
| GOLGA8CP   | 15q11.2         | -0.2663  | 1.27E-07 | 1.42E-06 |
| TIPARP-AS1 | 3q25.31         | -0.26616 | 1.29E-07 | 1.44E-06 |
| STARD3NL   | 7p14.1          | -0.26604 | 1.31E-07 | 1.46E-06 |
| TOR1AIP2   | 1q25.2          | 0.26596  | 1.32E-07 | 1.47E-06 |
| PTPN1      | 20q13.13        | -0.26591 | 1.33E-07 | 1.48E-06 |
| EXPH5      | 11q22.3         | 0.265863 | 1.33E-07 | 1.49E-06 |

|             |          |          |          |          |
|-------------|----------|----------|----------|----------|
| AP1M1       | 19p13.11 | -0.26586 | 1.33E-07 | 1.49E-06 |
| MBP         | 18q23    | 0.265826 | 1.34E-07 | 1.49E-06 |
| SSC4D       | 7q11.23  | -0.26573 | 1.35E-07 | 1.51E-06 |
| FGFR4       | 5q35.2   | -0.2657  | 1.36E-07 | 1.51E-06 |
| KRTAP3-2    | 17q21.2  | -0.26567 | 1.36E-07 | 1.51E-06 |
| SERPIND1    | 22q11.21 | -0.26561 | 1.37E-07 | 1.52E-06 |
| IMMP2L      | 7q31.1   | -0.26556 | 1.38E-07 | 1.53E-06 |
| MMD         | 17q22    | -0.26553 | 1.38E-07 | 1.54E-06 |
| CPSF4       | 7q22.1   | -0.26548 | 1.39E-07 | 1.54E-06 |
| RUSC2       | 9p13.3   | -0.26537 | 1.41E-07 | 1.56E-06 |
| NR1H4       | 12q23.1  | 0.265361 | 1.41E-07 | 1.56E-06 |
| FAM122B     | Xq26.3   | -0.26534 | 1.41E-07 | 1.56E-06 |
| SPOUT1      | 9q34.11  | -0.26531 | 1.42E-07 | 1.57E-06 |
| HYAL2       | 3p21.31  | -0.26531 | 1.42E-07 | 1.57E-06 |
| SLC30A9     | 4p13     | 0.265231 | 1.43E-07 | 1.58E-06 |
| IFFO2       | 1p36.13  | -0.26521 | 1.43E-07 | 1.58E-06 |
| VAV2        | 9q34.2   | -0.2652  | 1.44E-07 | 1.59E-06 |
| DDX18       | 2q14.1   | -0.26504 | 1.46E-07 | 1.61E-06 |
| KCNK17      | 6p21.2   | -0.26495 | 1.47E-07 | 1.63E-06 |
| ITCH        | 20q11.22 | -0.26494 | 1.48E-07 | 1.63E-06 |
| SPATA5      | 4q28.1   | 0.26493  | 1.48E-07 | 1.63E-06 |
| ANXA6       | 5q33.1   | -0.26489 | 1.48E-07 | 1.64E-06 |
| ZBED5       | 11p15.4  | -0.26487 | 1.49E-07 | 1.64E-06 |
| PTRH2       | 17q23.1  | -0.26486 | 1.49E-07 | 1.64E-06 |
| APOBR       | 16p12.1  | 0.264788 | 1.50E-07 | 1.65E-06 |
| ABT1        | 6p22.2   | -0.26479 | 1.50E-07 | 1.65E-06 |
| MMP11       | 22q11.23 | -0.26477 | 1.51E-07 | 1.65E-06 |
| SMAP2       | 1p34.2   | 0.26476  | 1.51E-07 | 1.65E-06 |
| BAIAP2L2    | 22q13.1  | 0.264757 | 1.51E-07 | 1.65E-06 |
| NAT10       | 11p13    | -0.26475 | 1.51E-07 | 1.66E-06 |
| DLL3        | 19q13.2  | -0.26466 | 1.52E-07 | 1.67E-06 |
| PWWP3B      | Xq22.3   | -0.26464 | 1.53E-07 | 1.67E-06 |
| FLII        | 17p11.2  | 0.264589 | 1.54E-07 | 1.68E-06 |
| ZNF48       | 16p11.2  | -0.26457 | 1.54E-07 | 1.68E-06 |
| COPRS       | 17q11.2  | -0.26455 | 1.54E-07 | 1.69E-06 |
| KIF1B       | 1p36.22  | 0.264465 | 1.56E-07 | 1.70E-06 |
| VRK3        | 19q13.33 | 0.264461 | 1.56E-07 | 1.70E-06 |
| NINL        | 20p11.21 | -0.26442 | 1.57E-07 | 1.71E-06 |
| SLC24A5     | 15q21.1  | -0.26439 | 1.57E-07 | 1.71E-06 |
| DYRK2       | 12q15    | 0.264333 | 1.58E-07 | 1.72E-06 |
| ATXN7L2     | 1p13.3   | -0.26416 | 1.61E-07 | 1.76E-06 |
| EEF1D       | 8q24.3   | -0.26412 | 1.62E-07 | 1.76E-06 |
| RIPK2       | 8q21.3   | -0.26411 | 1.62E-07 | 1.77E-06 |
| RPF2        | 6q21     | -0.26408 | 1.62E-07 | 1.77E-06 |
| MIR4435-2HG | 2q13     | -0.26397 | 1.65E-07 | 1.79E-06 |
| HSFX2       | Xq28     | -0.26395 | 1.65E-07 | 1.79E-06 |
| KRT32       | 17q21.2  | -0.26395 | 1.65E-07 | 1.79E-06 |
| MEA1        | 6p21.1   | -0.26382 | 1.67E-07 | 1.82E-06 |
| SCAP        | 3p21.31  | -0.2638  | 1.68E-07 | 1.82E-06 |
| ITPR3       | 6p21.31  | 0.263724 | 1.69E-07 | 1.84E-06 |
| ZIC5        | 13q32.3  | 0.263702 | 1.70E-07 | 1.84E-06 |
| SAMD10      | 20q13.33 | -0.26348 | 1.74E-07 | 1.88E-06 |
| UNC119      | 17q11.2  | -0.26346 | 1.74E-07 | 1.89E-06 |
| CDIPTOSP    | 16p11.2  | -0.26346 | 1.74E-07 | 1.89E-06 |
| SLC10A3     | Xq28     | -0.26345 | 1.74E-07 | 1.89E-06 |
| PLEKHM1     | 17q21.31 | 0.263403 | 1.75E-07 | 1.90E-06 |
| SLC49A4     | 3q21.1   | 0.26338  | 1.76E-07 | 1.90E-06 |
| TTC7B       | 14q32.11 | -0.26338 | 1.76E-07 | 1.90E-06 |

|           |                |          |          |          |
|-----------|----------------|----------|----------|----------|
| ALKBH6    | 19q13.12       | -0.26316 | 1.80E-07 | 1.95E-06 |
| ABCF2     | 7q36.1         | -0.26311 | 1.81E-07 | 1.95E-06 |
| ZNHIT3    | 17q12          | -0.26307 | 1.82E-07 | 1.96E-06 |
| PLS3      | Xq23           | -0.26288 | 1.86E-07 | 2.00E-06 |
| NOS1AP    | 1q23.3         | 0.262859 | 1.86E-07 | 2.01E-06 |
| LRRC2     | 3p21.31        | -0.26285 | 1.86E-07 | 2.01E-06 |
| LMNA      | 1q22           | 0.262845 | 1.86E-07 | 2.01E-06 |
| PCGF1     | 2p13.1         | -0.26278 | 1.88E-07 | 2.02E-06 |
| CKMT1A    | 15q15.3        | 0.262757 | 1.88E-07 | 2.03E-06 |
| CYTOR     | 2p11.2         | -0.26269 | 1.90E-07 | 2.04E-06 |
| C18ORF32  | 18q21.1        | 0.262661 | 1.90E-07 | 2.04E-06 |
| BIN1      | 2q14.3         | -0.26257 | 1.92E-07 | 2.06E-06 |
| CTSS      | 1q21.3         | 0.262556 | 1.93E-07 | 2.07E-06 |
| EFL1      | 15q25.2        | 0.262539 | 1.93E-07 | 2.07E-06 |
| RUNDC3A   | 17q21.31       | -0.2625  | 1.94E-07 | 2.08E-06 |
| MYO5C     | 15q21.2        | 0.262414 | 1.96E-07 | 2.10E-06 |
| RASL11B   | 4q12           | -0.26236 | 1.97E-07 | 2.11E-06 |
| RAB14     | 9q33.2         | 0.262282 | 1.98E-07 | 2.12E-06 |
| B4GALNT4  | 11p15.5        | -0.26226 | 1.99E-07 | 2.13E-06 |
| FOS       | 14q24.3        | 0.262226 | 2.00E-07 | 2.14E-06 |
| EIF3H     | 8q23.3-q24.11  | -0.26222 | 2.00E-07 | 2.14E-06 |
| ZNF623    | 8q24.3         | -0.26221 | 2.00E-07 | 2.14E-06 |
| MZF1-AS1  | 19q13.43       | 0.26219  | 2.00E-07 | 2.14E-06 |
| AQP7P3    | 9q21.11        | -0.26218 | 2.01E-07 | 2.14E-06 |
| CACNG4    | 17q24.2        | -0.26215 | 2.01E-07 | 2.15E-06 |
| ASAP1     | 8q24.21-q24.22 | -0.26212 | 2.02E-07 | 2.15E-06 |
| LINC00899 | 22q13.31       | -0.26197 | 2.06E-07 | 2.19E-06 |
| CHKA      | 11q13.2        | -0.26193 | 2.06E-07 | 2.20E-06 |
| KIN       | 10p14          | -0.26184 | 2.08E-07 | 2.22E-06 |
| PDAP1     | 7q22.1         | -0.26183 | 2.09E-07 | 2.22E-06 |
| ZSCAN12   | 6p22.1         | -0.26177 | 2.10E-07 | 2.23E-06 |
| IKBKG     | Xq28           | -0.26177 | 2.10E-07 | 2.23E-06 |
| SLC25A23  | 19p13.3        | 0.261725 | 2.11E-07 | 2.24E-06 |
| ZKSCAN7   | 3p21.31        | -0.26172 | 2.11E-07 | 2.24E-06 |
| RIPPLY3   | 21q22.13       | -0.26157 | 2.15E-07 | 2.28E-06 |
| RPL39     | Xq24           | -0.2614  | 2.19E-07 | 2.32E-06 |
| TDGF1P3   | Xq23           | -0.26135 | 2.20E-07 | 2.33E-06 |
| DUSP15    | 20q11.21       | -0.26135 | 2.20E-07 | 2.33E-06 |
| VSIR      | 10q22.1        | 0.261238 | 2.23E-07 | 2.36E-06 |
| EPB41L4A  | 5q22.1-q22.2   | 0.261237 | 2.23E-07 | 2.36E-06 |
| INF2      | 14q32.33       | 0.261228 | 2.23E-07 | 2.36E-06 |
| DTX3      | 12q13.3        | -0.2612  | 2.24E-07 | 2.36E-06 |
| FAM104B   | Xp11.21        | -0.26119 | 2.24E-07 | 2.37E-06 |
| ARL11     | 13q14.2        | -0.26118 | 2.24E-07 | 2.37E-06 |
| MBNL3     | Xq26.2         | 0.261124 | 2.25E-07 | 2.38E-06 |
| KDM4D     | 11q21          | -0.26106 | 2.27E-07 | 2.39E-06 |
| SP3       | 2q31.1         | -0.26106 | 2.27E-07 | 2.39E-06 |
| CEP70     | 3q22.3         | 0.261033 | 2.28E-07 | 2.40E-06 |
| RNF138    | 18q12.1        | 0.261026 | 2.28E-07 | 2.40E-06 |
| TJAP1     | 6p21.1         | -0.26101 | 2.28E-07 | 2.40E-06 |
| CUL1      | 7q36.1         | -0.26091 | 2.31E-07 | 2.43E-06 |
| USO1      | 4q21.1         | 0.260896 | 2.31E-07 | 2.43E-06 |
| MPPE1     | 18p11.21       | 0.260863 | 2.32E-07 | 2.44E-06 |
| GSTM4     | 1p13.3         | 0.260814 | 2.33E-07 | 2.45E-06 |
| LRRC74A   | 14q24.3        | -0.26077 | 2.34E-07 | 2.46E-06 |
| TET2      | 4q24           | 0.260749 | 2.35E-07 | 2.47E-06 |
| CAPS      | 19p13.3        | -0.26072 | 2.36E-07 | 2.47E-06 |
| WDSUB1    | 2q24.2         | -0.26067 | 2.37E-07 | 2.48E-06 |

|           |               |          |          |          |
|-----------|---------------|----------|----------|----------|
| RRN3P2    | 16p11.2       | -0.26066 | 2.37E-07 | 2.48E-06 |
| AIG1      | 6q24.2        | -0.26062 | 2.38E-07 | 2.50E-06 |
| KNOP1     | 16p12.3       | -0.26056 | 2.40E-07 | 2.51E-06 |
| CREB3L2   | 7q33          | 0.260507 | 2.41E-07 | 2.52E-06 |
| NUDT6     | 4q28.1        | 0.260488 | 2.42E-07 | 2.53E-06 |
| CRYAB     | 11q23.1       | -0.2604  | 2.44E-07 | 2.55E-06 |
| LPGAT1    | 1q32.3        | 0.260384 | 2.45E-07 | 2.55E-06 |
| FAM227A   | 22q13.1       | -0.26037 | 2.45E-07 | 2.56E-06 |
| PPM1A     | 14q23.1       | 0.260366 | 2.45E-07 | 2.56E-06 |
| LTV1      | 6q24.2        | -0.26035 | 2.46E-07 | 2.56E-06 |
| TRAF5     | 1q32.3        | -0.2603  | 2.47E-07 | 2.57E-06 |
| DOCK8     | 9p24.3        | 0.260267 | 2.48E-07 | 2.58E-06 |
| UBTD1     | 10q24.1-q24.2 | -0.26022 | 2.49E-07 | 2.59E-06 |
| WDR7      | 18q21.31      | 0.26018  | 2.50E-07 | 2.60E-06 |
| OTC       | Xp11.4        | 0.260089 | 2.53E-07 | 2.63E-06 |
| LINC00520 | 14q22.3       | 0.260054 | 2.54E-07 | 2.64E-06 |
| UPF3B     | Xq24          | -0.26004 | 2.54E-07 | 2.64E-06 |
| NCOA6     | 20q11.22      | -0.25999 | 2.55E-07 | 2.65E-06 |
| RABGAP1L  | 1q25.1        | 0.259916 | 2.57E-07 | 2.67E-06 |
| SMOX      | 20p13         | -0.25984 | 2.60E-07 | 2.69E-06 |
| USP6NL    | 10p14         | -0.25984 | 2.60E-07 | 2.69E-06 |
| HDGFL3    | 15q25.2       | -0.25984 | 2.60E-07 | 2.69E-06 |
| APBB1     | 11p15.4       | -0.25979 | 2.61E-07 | 2.70E-06 |
| NDRG4     | 16q21         | -0.25978 | 2.61E-07 | 2.70E-06 |
| DUSP14    | 17q12         | -0.25977 | 2.62E-07 | 2.71E-06 |
| SLC16A14  | 2q36.3        | 0.25975  | 2.62E-07 | 2.71E-06 |
| MYO7B     | 2q14.3        | 0.259735 | 2.63E-07 | 2.71E-06 |
| CTTNBP2   | 7q31.31       | -0.25971 | 2.63E-07 | 2.72E-06 |
| NADK      | 1p36.33       | 0.259694 | 2.64E-07 | 2.72E-06 |
| SMAD1     | 4q31.21       | 0.259683 | 2.64E-07 | 2.72E-06 |
| NUDT14    | 14q32.33      | -0.25968 | 2.64E-07 | 2.72E-06 |
| SLC28A2   | 15q21.1       | 0.259634 | 2.66E-07 | 2.74E-06 |
| PTDSS1    | 8q22.1        | -0.25958 | 2.67E-07 | 2.75E-06 |
| WFDC10A   | 20q13.12      | -0.25956 | 2.68E-07 | 2.76E-06 |
| SLC38A9   | 5q11.2        | -0.25956 | 2.68E-07 | 2.76E-06 |
| IFNAR1    | 21q22.11      | 0.259556 | 2.68E-07 | 2.76E-06 |
| MYOM3     | 1p36.11       | -0.25953 | 2.69E-07 | 2.76E-06 |
| ARAP1     | 11q13.4       | -0.25937 | 2.73E-07 | 2.81E-06 |
| ZNF577    | 19q13.41      | -0.25921 | 2.78E-07 | 2.86E-06 |
| ZNF662    | 3p22.1        | -0.25918 | 2.79E-07 | 2.86E-06 |
| TIMM8A    | Xq22.1        | -0.25918 | 2.79E-07 | 2.86E-06 |
| SLC45A1   | 1p36.23       | -0.25918 | 2.79E-07 | 2.86E-06 |
| PGS1      | 17q25.3       | -0.25917 | 2.79E-07 | 2.86E-06 |
| ZNF530    | 19q13.43      | -0.25913 | 2.81E-07 | 2.88E-06 |
| CBX8      | 17q25.3       | -0.25908 | 2.82E-07 | 2.89E-06 |
| GOLGA8G   | 15q13.1       | -0.25904 | 2.83E-07 | 2.90E-06 |
| EGLN3     | 14q13.1       | 0.259031 | 2.84E-07 | 2.90E-06 |
| LINC02591 | 1q21.1        | -0.25896 | 2.86E-07 | 2.92E-06 |
| EXOSC4    | 8q24.3        | -0.25896 | 2.86E-07 | 2.92E-06 |
| DHFR      | 5q14.1        | 0.258919 | 2.87E-07 | 2.93E-06 |
| TUBG2     | 17q21.2       | -0.25889 | 2.88E-07 | 2.94E-06 |
| ZFP28     | 19q13.43      | -0.25887 | 2.89E-07 | 2.94E-06 |
| GPC1      | 2q37.3        | -0.25867 | 2.95E-07 | 3.01E-06 |
| VSIG1     | Xq22.3        | 0.258634 | 2.96E-07 | 3.02E-06 |
| TSEN54    | 17q25.1       | -0.25863 | 2.96E-07 | 3.02E-06 |
| MYL9      | 20q11.23      | -0.25855 | 2.99E-07 | 3.04E-06 |
| ABCA10    | 17q24.3       | 0.25855  | 2.99E-07 | 3.04E-06 |
| FLVCR2    | 14q24.3       | 0.258532 | 2.99E-07 | 3.05E-06 |

|           |                 |          |          |          |
|-----------|-----------------|----------|----------|----------|
| CTSH      | 15q25.1         | -0.25848 | 3.01E-07 | 3.06E-06 |
| GTF2H1    | 11p15.1         | -0.25845 | 3.02E-07 | 3.07E-06 |
| ORMDL1    | 2q32.2          | -0.25844 | 3.02E-07 | 3.07E-06 |
| SEC23IP   | 10q26.11-q26.12 | 0.258443 | 3.02E-07 | 3.07E-06 |
| RORC      | 1q21.3          | 0.258441 | 3.02E-07 | 3.07E-06 |
| HERC3     | 4q22.1          | 0.258362 | 3.05E-07 | 3.09E-06 |
| SRPK3     | Xq28            | -0.25832 | 3.07E-07 | 3.11E-06 |
| NREP      | 5q22.1          | -0.25828 | 3.08E-07 | 3.12E-06 |
| CYP2C9    | 10q23.33        | 0.25826  | 3.08E-07 | 3.12E-06 |
| CLDN1     | 3q28            | -0.25824 | 3.09E-07 | 3.13E-06 |
| PRELID2   | 5q32            | 0.258232 | 3.09E-07 | 3.13E-06 |
| MBOAT2    | 2p25.1          | 0.258219 | 3.10E-07 | 3.13E-06 |
| E2F5      | 8q21.2          | -0.25812 | 3.13E-07 | 3.17E-06 |
| NFE2L3    | 7p15.2          | -0.25805 | 3.15E-07 | 3.19E-06 |
| CEP95     | 17q23.3         | -0.25802 | 3.17E-07 | 3.20E-06 |
| GPR179    | 17q12           | -0.25799 | 3.18E-07 | 3.20E-06 |
| CXORF40B  | Xq28            | -0.25798 | 3.18E-07 | 3.21E-06 |
| PISD      | 22q12.2         | -0.25797 | 3.18E-07 | 3.21E-06 |
| TRIM38    | 6p22.2          | 0.257938 | 3.19E-07 | 3.22E-06 |
| REEP2     | 5q31.2          | -0.25793 | 3.20E-07 | 3.22E-06 |
| SETMAR    | 3p26.1          | -0.25792 | 3.20E-07 | 3.22E-06 |
| LDLR      | 19p13.2         | 0.257887 | 3.21E-07 | 3.23E-06 |
| SLC44A2   | 19p13.2         | 0.257849 | 3.23E-07 | 3.24E-06 |
| CEP41     | 7q32.2          | -0.25779 | 3.25E-07 | 3.26E-06 |
| TMEM9     | 1q32.1          | -0.25777 | 3.25E-07 | 3.27E-06 |
| SEC22B    | 1p12            | 0.25775  | 3.26E-07 | 3.27E-06 |
| C16ORF74  | 16q24.1         | -0.25773 | 3.27E-07 | 3.28E-06 |
| DNASE1    | 16p13.3         | -0.25773 | 3.27E-07 | 3.28E-06 |
| PUF60     | 8q24.3          | -0.25769 | 3.28E-07 | 3.29E-06 |
| ZNF691    | 1p34.2          | -0.25768 | 3.28E-07 | 3.29E-06 |
| B4GALT5   | 20q13.13        | -0.25768 | 3.29E-07 | 3.29E-06 |
| GPR19     | 12p13.1         | -0.25765 | 3.30E-07 | 3.30E-06 |
| PPP6R1    | 19q13.42        | 0.25763  | 3.30E-07 | 3.30E-06 |
| NBL1      | 1p36.13         | 0.257619 | 3.31E-07 | 3.31E-06 |
| SHISA9    | 16p13.12        | -0.2576  | 3.31E-07 | 3.31E-06 |
| ZC3H12D   | 6q25.1          | 0.25756  | 3.33E-07 | 3.32E-06 |
| DDX56     | 7p13            | -0.25756 | 3.33E-07 | 3.32E-06 |
| FAM220A   | 7p22.1          | -0.25752 | 3.34E-07 | 3.34E-06 |
| TDRKH     | 1q21.3          | -0.25752 | 3.34E-07 | 3.34E-06 |
| C15ORF48  | 15q21.1         | 0.257512 | 3.35E-07 | 3.34E-06 |
| LIMS2     | 2q14.3          | -0.25749 | 3.35E-07 | 3.34E-06 |
| RASSF6    | 4q13.3          | 0.257422 | 3.38E-07 | 3.36E-06 |
| SPATA31A1 | 9p12            | -0.25737 | 3.40E-07 | 3.38E-06 |
| BCAR1     | 16q23.1         | 0.257288 | 3.43E-07 | 3.41E-06 |
| ZDHHC8    | 22q11.21        | -0.25727 | 3.43E-07 | 3.41E-06 |
| KHK       | 2p23.3          | -0.25711 | 3.49E-07 | 3.47E-06 |
| HMGN2P46  | 15q21.1         | 0.25694  | 3.56E-07 | 3.54E-06 |
| HAR1B     | 20q13.33        | 0.256903 | 3.57E-07 | 3.55E-06 |
| FAM83A    | 8q24.13         | 0.256828 | 3.60E-07 | 3.58E-06 |
| PRELID3B  | 20q13.32        | -0.25682 | 3.61E-07 | 3.58E-06 |
| CYB5D2    | 17p13.2         | 0.256808 | 3.61E-07 | 3.58E-06 |
| RB1CC1    | 8q11.23         | -0.25681 | 3.61E-07 | 3.58E-06 |
| SMIM10    | Xq26.3          | -0.25677 | 3.63E-07 | 3.59E-06 |
| VASH2     | 1q32.3          | -0.25646 | 3.75E-07 | 3.71E-06 |
| FUCA1     | 1p36.11         | 0.256439 | 3.76E-07 | 3.72E-06 |
| NME4      | 16p13.3         | -0.25636 | 3.79E-07 | 3.75E-06 |
| BORCS6    | 17p13.1         | 0.256248 | 3.84E-07 | 3.79E-06 |
| GTF2E1    | 3q13.33         | -0.25614 | 3.88E-07 | 3.83E-06 |



|            |          |          |          |          |
|------------|----------|----------|----------|----------|
| ENDOD1     | 11q21    | 0.25603  | 3.93E-07 | 3.88E-06 |
| LRRC37A3   | 17q24.1  | -0.25602 | 3.93E-07 | 3.88E-06 |
| MRPL53     | 2p13.1   | -0.256   | 3.94E-07 | 3.89E-06 |
| AHNAK      | 11q12.3  | 0.25599  | 3.94E-07 | 3.89E-06 |
| TXNDC16    | 14q22.1  | 0.25594  | 3.97E-07 | 3.91E-06 |
| USF3       | 3q13.2   | 0.255894 | 3.99E-07 | 3.93E-06 |
| CRABP2     | 1q23.1   | -0.25587 | 4.00E-07 | 3.93E-06 |
| SNHG32     | 6p21.33  | -0.25581 | 4.02E-07 | 3.96E-06 |
| PTPN18     | 2q21.1   | 0.255671 | 4.08E-07 | 4.02E-06 |
| HSD11B1L   | 19p13.3  | -0.25566 | 4.09E-07 | 4.02E-06 |
| SEPTIN7    | 7p14.2   | -0.25565 | 4.09E-07 | 4.02E-06 |
| MAP2K4     | 17p12    | 0.255625 | 4.10E-07 | 4.03E-06 |
| ACKR4      | 3q22.1   | 0.255611 | 4.11E-07 | 4.03E-06 |
| TMEM35A    | Xq22.1   | -0.25559 | 4.12E-07 | 4.04E-06 |
| FOXD4L1    | 2q14.1   | 0.255538 | 4.14E-07 | 4.06E-06 |
| DDX60      | 4q32.3   | 0.255515 | 4.15E-07 | 4.07E-06 |
| PHLDB3     | 19q13.31 | -0.25548 | 4.17E-07 | 4.08E-06 |
| CLIC5      | 6p21.1   | 0.255464 | 4.17E-07 | 4.09E-06 |
| MRPS17     | 7p11.2   | -0.25545 | 4.18E-07 | 4.09E-06 |
| MECOM      | 3q26.2   | 0.255435 | 4.19E-07 | 4.10E-06 |
| TRMT61B    | 2p23.2   | -0.25537 | 4.22E-07 | 4.12E-06 |
| ADCY6      | 12q13.12 | 0.255361 | 4.22E-07 | 4.12E-06 |
| LINC00482  | 17q25.3  | 0.255174 | 4.31E-07 | 4.21E-06 |
| ATP6V1C2   | -        | -0.25516 | 4.31E-07 | 4.21E-06 |
| KYNU       | 2q22.2   | 0.25515  | 4.32E-07 | 4.21E-06 |
| SNX24      | 5q23.2   | 0.255133 | 4.32E-07 | 4.22E-06 |
| GUSBP4     | 6p11.2   | -0.25501 | 4.38E-07 | 4.27E-06 |
| TIMMDC1    | 3q13.33  | -0.25494 | 4.42E-07 | 4.30E-06 |
| RPS6KA5    | 14q32.11 | 0.254887 | 4.44E-07 | 4.33E-06 |
| HCAR1      | 12q24.31 | -0.25488 | 4.44E-07 | 4.33E-06 |
| PTP4A1     | 6q12     | 0.254786 | 4.49E-07 | 4.37E-06 |
| HDAC8      | Xq13.1   | -0.25478 | 4.49E-07 | 4.37E-06 |
| VWCE       | 11q12.2  | -0.25478 | 4.49E-07 | 4.37E-06 |
| ST6GALNAC6 | 9q34.11  | 0.254769 | 4.50E-07 | 4.37E-06 |
| NINJ1      | 9q22.31  | -0.25474 | 4.51E-07 | 4.38E-06 |
| OXLD1      | 17q25.3  | -0.25472 | 4.52E-07 | 4.39E-06 |
| VANGL2     | 1q23.2   | -0.2547  | 4.53E-07 | 4.40E-06 |
| EPHA10     | 1p34.3   | 0.254583 | 4.59E-07 | 4.45E-06 |
| MATN3      | 2p24.1   | -0.25456 | 4.60E-07 | 4.46E-06 |
| HFE        | 6p22.2   | 0.25453  | 4.61E-07 | 4.47E-06 |
| GDPD3      | 16p11.2  | 0.254476 | 4.64E-07 | 4.49E-06 |
| MGAT3      | 22q13.1  | 0.254425 | 4.67E-07 | 4.52E-06 |
| MRPS23     | 17q22    | -0.25433 | 4.72E-07 | 4.56E-06 |
| TMEM181    | 6q25.3   | 0.254202 | 4.78E-07 | 4.62E-06 |
| MPLKIP     | 7p14.1   | -0.25419 | 4.79E-07 | 4.63E-06 |
| ADAM9      | 8p11.22  | 0.254178 | 4.79E-07 | 4.63E-06 |
| DDAH2      | 6p21.33  | -0.25413 | 4.81E-07 | 4.65E-06 |
| RUSC1      | 1q22     | 0.254101 | 4.83E-07 | 4.66E-06 |
| NAT8B      | 2p13.1   | 0.253973 | 4.90E-07 | 4.72E-06 |
| CCDC90B    | 11q14.1  | -0.25382 | 4.98E-07 | 4.80E-06 |
| UXS1       | 2q12.2   | -0.25374 | 5.02E-07 | 4.84E-06 |
| ANO1       | 11q13.3  | 0.253686 | 5.05E-07 | 4.86E-06 |
| NAALADL1   | 11q13.1  | -0.25362 | 5.09E-07 | 4.90E-06 |
| SEC13      | 3p25.3   | 0.253597 | 5.10E-07 | 4.91E-06 |
| POLR2A     | 17p13.1  | 0.253571 | 5.11E-07 | 4.92E-06 |
| SEPSECS    | 4p15.2   | 0.253563 | 5.12E-07 | 4.92E-06 |
| CCDC136    | 7q32.1   | -0.25355 | 5.12E-07 | 4.92E-06 |
| IGSF22     | 11p15.1  | -0.25354 | 5.13E-07 | 4.92E-06 |

|           |          |          |          |          |
|-----------|----------|----------|----------|----------|
| ZNF608    | 5q23.2   | -0.25353 | 5.13E-07 | 4.93E-06 |
| ME3       | 11q14.2  | -0.25351 | 5.14E-07 | 4.94E-06 |
| TMEM167A  | 5q14.2   | 0.25351  | 5.15E-07 | 4.94E-06 |
| BAG1      | 9p13.3   | 0.253444 | 5.18E-07 | 4.97E-06 |
| HDHD2     | 18q21.1  | 0.253443 | 5.18E-07 | 4.97E-06 |
| ZNF541    | 19q13.33 | -0.25341 | 5.20E-07 | 4.98E-06 |
| SLC40A1   | 2q32.2   | 0.253373 | 5.22E-07 | 5.00E-06 |
| SLC46A3   | 13q12.3  | 0.253328 | 5.25E-07 | 5.02E-06 |
| SLC19A2   | 1q24.2   | -0.25332 | 5.25E-07 | 5.02E-06 |
| IL10RB    | 21q22.11 | 0.253291 | 5.27E-07 | 5.03E-06 |
| CTNNA1    | 5q31.2   | 0.253289 | 5.27E-07 | 5.03E-06 |
| OCEL1     | 19p13.11 | 0.253253 | 5.29E-07 | 5.05E-06 |
| AKAP13    | 15q25.3  | 0.253232 | 5.30E-07 | 5.06E-06 |
| CD82      | 11p11.2  | 0.253223 | 5.30E-07 | 5.06E-06 |
| CIB1      | 15q26.1  | 0.253211 | 5.31E-07 | 5.07E-06 |
| LYPD5     | 19q13.31 | 0.253163 | 5.34E-07 | 5.09E-06 |
| EMD       | Xq28     | -0.25303 | 5.41E-07 | 5.16E-06 |
| C19ORF12  | 19q12    | -0.25298 | 5.44E-07 | 5.18E-06 |
| MORC3     | 21q22.12 | 0.252949 | 5.46E-07 | 5.20E-06 |
| MMP15     | 16q21    | 0.252898 | 5.49E-07 | 5.22E-06 |
| CCPG1     | 15q21.3  | 0.25285  | 5.52E-07 | 5.25E-06 |
| FBXL20    | 17q12    | -0.25284 | 5.52E-07 | 5.25E-06 |
| TOM1L2    | 17p11.2  | 0.252817 | 5.54E-07 | 5.26E-06 |
| NANOS3    | 19p13.12 | -0.25273 | 5.59E-07 | 5.31E-06 |
| ZPBP      | 7p12.2   | -0.25267 | 5.62E-07 | 5.34E-06 |
| PUM2      | 2p24.1   | -0.2526  | 5.67E-07 | 5.37E-06 |
| NCBP3     | 17p13.2  | 0.252599 | 5.67E-07 | 5.38E-06 |
| RRS1      | 8q13.1   | -0.25259 | 5.67E-07 | 5.38E-06 |
| TYMS      | 18p11.32 | 0.252567 | 5.69E-07 | 5.39E-06 |
| NCKAP5    | 2q21.2   | -0.25248 | 5.74E-07 | 5.43E-06 |
| MIR17HG   | 13q31.3  | -0.25244 | 5.77E-07 | 5.46E-06 |
| PPP1R36   | 14q23.3  | 0.252431 | 5.77E-07 | 5.46E-06 |
| RNF146    | 6q22.33  | -0.25243 | 5.77E-07 | 5.46E-06 |
| NPHP1     | 2q13     | -0.25239 | 5.80E-07 | 5.48E-06 |
| LINC00662 | 19q11    | -0.25238 | 5.80E-07 | 5.48E-06 |
| PNPT1     | 2p16.1   | -0.25234 | 5.83E-07 | 5.50E-06 |
| AJUBA     | 14q11.2  | -0.25233 | 5.83E-07 | 5.50E-06 |
| ATG4A     | Xq22.3   | 0.252329 | 5.83E-07 | 5.50E-06 |
| ZNF575    | 19q13.31 | 0.252318 | 5.84E-07 | 5.51E-06 |
| CCNO      | 5q11.2   | 0.252311 | 5.84E-07 | 5.51E-06 |
| TNFSF10   | 3q26.31  | 0.252292 | 5.86E-07 | 5.52E-06 |
| RBM38     | 20q13.31 | -0.25216 | 5.94E-07 | 5.59E-06 |
| TRAPPC8   | 18q12.1  | 0.252153 | 5.94E-07 | 5.59E-06 |
| LIN7B     | 19q13.33 | -0.25213 | 5.96E-07 | 5.60E-06 |
| FRRS1     | 1p21.2   | 0.252084 | 5.99E-07 | 5.63E-06 |
| ESPN      | 1p36.31  | -0.25207 | 5.99E-07 | 5.63E-06 |
| TOMM6     | 6p21.1   | -0.252   | 6.04E-07 | 5.67E-06 |
| TMEM176A  | 7q36.1   | -0.25196 | 6.06E-07 | 5.69E-06 |
| ARHGAP39  | 8q24.3   | -0.25195 | 6.07E-07 | 5.70E-06 |
| ZBTB33    | Xq24     | -0.25193 | 6.08E-07 | 5.71E-06 |
| STAT3     | 17q21.2  | 0.251855 | 6.13E-07 | 5.75E-06 |
| METTL8    | 2q31.1   | -0.25185 | 6.14E-07 | 5.75E-06 |
| PDCL3     | 2q11.2   | -0.25181 | 6.16E-07 | 5.77E-06 |
| PRSS16    | 6p22.1   | 0.251791 | 6.18E-07 | 5.78E-06 |
| NDUFC2    | 11q14.1  | -0.25176 | 6.20E-07 | 5.80E-06 |
| ARL14EP   | 11p14.1  | -0.25176 | 6.20E-07 | 5.80E-06 |
| TXNDC11   | 16p13.13 | 0.251723 | 6.22E-07 | 5.81E-06 |
| DHX57     | 2p22.1   | -0.25172 | 6.22E-07 | 5.81E-06 |

|          |                |          |          |          |
|----------|----------------|----------|----------|----------|
| EIF2AK3  | 2p11.2         | 0.251615 | 6.29E-07 | 5.88E-06 |
| ENTPD7   | 10q24.2        | 0.251443 | 6.41E-07 | 5.98E-06 |
| MPP5     | 14q23.3        | 0.251335 | 6.48E-07 | 6.05E-06 |
| ZBTB7A   | 19p13.3        | 0.251328 | 6.49E-07 | 6.05E-06 |
| FN1      | 2q35           | -0.25126 | 6.53E-07 | 6.09E-06 |
| EDNRA    | 4q31.22-q31.23 | -0.25125 | 6.54E-07 | 6.10E-06 |
| OXCT1    | 5p13.1         | 0.251228 | 6.55E-07 | 6.11E-06 |
| MAGEE1   | Xq13.3         | -0.25122 | 6.56E-07 | 6.11E-06 |
| AMZ2P1   | 17q24.1        | -0.25109 | 6.65E-07 | 6.19E-06 |
| SUGCT    | 7p14.1         | -0.25108 | 6.66E-07 | 6.19E-06 |
| ZNF302   | 19q13.11       | -0.25105 | 6.68E-07 | 6.21E-06 |
| ITPK1    | 14q32.12       | 0.251028 | 6.69E-07 | 6.22E-06 |
| MALSU1   | 7p15.3         | -0.25086 | 6.81E-07 | 6.33E-06 |
| SYNE4    | 19q13.12       | -0.25075 | 6.89E-07 | 6.40E-06 |
| FUZ      | 19q13.33       | -0.25073 | 6.91E-07 | 6.41E-06 |
| MAN2A1   | 5q21.3         | 0.250675 | 6.95E-07 | 6.45E-06 |
| ANAPC11  | 17q25.3        | -0.25065 | 6.96E-07 | 6.46E-06 |
| ITGA9    | 3p22.2         | -0.25062 | 6.99E-07 | 6.48E-06 |
| PRCP     | 11q14.1        | -0.25061 | 7.00E-07 | 6.48E-06 |
| EPRS     | 1q41           | 0.250486 | 7.09E-07 | 6.56E-06 |
| RSL1D1   | 16p13.13       | -0.25045 | 7.11E-07 | 6.58E-06 |
| NIPAL1   | 4p12           | 0.250403 | 7.15E-07 | 6.61E-06 |
| TMEM125  | 1p34.2         | 0.250319 | 7.21E-07 | 6.67E-06 |
| TPX2     | 20q11.21       | -0.25031 | 7.22E-07 | 6.67E-06 |
| KLF5     | 13q22.1        | 0.250281 | 7.24E-07 | 6.69E-06 |
| MRM2     | 7p22.3         | -0.25012 | 7.37E-07 | 6.80E-06 |
| MFN2     | 1p36.22        | 0.250084 | 7.39E-07 | 6.82E-06 |
| DSCC1    | 8q24.12        | -0.25006 | 7.42E-07 | 6.84E-06 |
| FKBP7    | 2q31.2         | -0.25005 | 7.42E-07 | 6.85E-06 |
| TMEM99   | 17q21.2        | -0.25001 | 7.45E-07 | 6.87E-06 |
| HIGD1B   | 17q21.31       | -0.24994 | 7.51E-07 | 6.91E-06 |
| YTHDC2   | 5q22.2         | 0.249927 | 7.52E-07 | 6.92E-06 |
| ABCA11P  | 4p16.3         | -0.24992 | 7.52E-07 | 6.92E-06 |
| TULP1    | 6p21.31        | -0.24988 | 7.55E-07 | 6.95E-06 |
| BABAM2   | 2p23.2         | -0.24988 | 7.55E-07 | 6.95E-06 |
| KRTAP1-1 | 17q21.2        | -0.24983 | 7.59E-07 | 6.98E-06 |
| TP53I11  | 11p11.2        | 0.249791 | 7.63E-07 | 7.01E-06 |
| SS18L2   | 3p22.1         | -0.24973 | 7.68E-07 | 7.05E-06 |
| FBXO44   | 1p36.22        | -0.24973 | 7.68E-07 | 7.05E-06 |
| ZNF12    | 7p22.1         | -0.24972 | 7.68E-07 | 7.05E-06 |
| XPOT     | 12q14.2        | -0.2497  | 7.69E-07 | 7.06E-06 |
| CRYAA    | 21q22.3        | -0.24969 | 7.71E-07 | 7.06E-06 |
| SCN5A    | 3p22.2         | -0.24957 | 7.81E-07 | 7.15E-06 |
| TGFBI    | 5q31.1         | -0.24951 | 7.85E-07 | 7.19E-06 |
| AQP10    | 1q21.3         | 0.249472 | 7.88E-07 | 7.21E-06 |
| ARL1     | 12q23.2        | 0.24947  | 7.89E-07 | 7.21E-06 |
| PPM1L    | 3q25.33-q26.1  | 0.249424 | 7.92E-07 | 7.25E-06 |
| BHLHB9   | Xq22.1         | -0.24939 | 7.95E-07 | 7.27E-06 |
| NMNAT3   | 3q23           | -0.24937 | 7.97E-07 | 7.28E-06 |
| ATP9B    | 18q23          | 0.249361 | 7.98E-07 | 7.28E-06 |
| DMXL1    | 5q23.1         | 0.249352 | 7.98E-07 | 7.29E-06 |
| TSSK6    | 19p13.11       | -0.24935 | 7.99E-07 | 7.29E-06 |
| SMPD4    | 2q21.1         | -0.2493  | 8.02E-07 | 7.32E-06 |
| CHCHD6   | 3q21.3         | -0.24929 | 8.03E-07 | 7.32E-06 |
| PADI2    | 1p36.13        | 0.249288 | 8.04E-07 | 7.32E-06 |
| CUL4B    | Xq24           | -0.24921 | 8.11E-07 | 7.38E-06 |
| FBXO27   | 19q13.2        | -0.24915 | 8.16E-07 | 7.42E-06 |
| RGL2     | 6p21.32        | -0.24914 | 8.17E-07 | 7.43E-06 |

|           |          |          |          |          |
|-----------|----------|----------|----------|----------|
| C5ORF30   | 5q21.1   | 0.249092 | 8.20E-07 | 7.46E-06 |
| CERK      | 22q13.31 | -0.24909 | 8.21E-07 | 7.46E-06 |
| PKN2      | 1p22.2   | 0.249055 | 8.24E-07 | 7.48E-06 |
| ME2       | 18q21.2  | 0.24895  | 8.33E-07 | 7.56E-06 |
| ENOSF1    | 18p11.32 | 0.248917 | 8.36E-07 | 7.59E-06 |
| ALOX5     | 10q11.21 | 0.248895 | 8.38E-07 | 7.60E-06 |
| MEAF6     | 1p34.3   | -0.24884 | 8.42E-07 | 7.64E-06 |
| GPRIN3    | 4q22.1   | 0.248839 | 8.42E-07 | 7.64E-06 |
| NMUR2     | 5q33.1   | 0.24876  | 8.49E-07 | 7.70E-06 |
| SPEG      | 2q35     | -0.24875 | 8.50E-07 | 7.70E-06 |
| TRMT10A   | 4q23     | 0.248653 | 8.59E-07 | 7.78E-06 |
| COPB2     | 3q23     | 0.248604 | 8.63E-07 | 7.81E-06 |
| MR11      | 19p13.13 | -0.2486  | 8.64E-07 | 7.81E-06 |
| PCED1A    | 20p13    | -0.24856 | 8.67E-07 | 7.84E-06 |
| PIM3      | 22q13.33 | 0.24856  | 8.67E-07 | 7.84E-06 |
| LOC728024 | 8p11.23  | -0.24854 | 8.69E-07 | 7.85E-06 |
| PROC      | 2q14.3   | -0.24852 | 8.71E-07 | 7.86E-06 |
| GRAP      | 17p11.2  | -0.24849 | 8.73E-07 | 7.88E-06 |
| FTX       | Xq13.2   | -0.2484  | 8.82E-07 | 7.95E-06 |
| KDM5B     | 1q32.1   | 0.248387 | 8.83E-07 | 7.96E-06 |
| FER1L4    | 20q11.22 | -0.24837 | 8.85E-07 | 7.97E-06 |
| PTF1A     | 10p12.2  | -0.24835 | 8.86E-07 | 7.98E-06 |
| MED11     | 17p13.2  | 0.248348 | 8.87E-07 | 7.99E-06 |
| LRRC20    | 10q22.1  | -0.24829 | 8.92E-07 | 8.03E-06 |
| EEF1AKMT1 | 13q12.11 | -0.24825 | 8.96E-07 | 8.06E-06 |
| FAXC      | 6q16.2   | -0.24819 | 9.02E-07 | 8.11E-06 |
| TBP       | 6q27     | -0.24818 | 9.02E-07 | 8.11E-06 |
| ZNF738    | 19p12    | -0.24818 | 9.02E-07 | 8.11E-06 |
| TEX261    | 2p13.3   | -0.24815 | 9.05E-07 | 8.13E-06 |
| PLCB3     | 11q13.1  | 0.248101 | 9.10E-07 | 8.17E-06 |
| ELMSAN1   | 14q24.3  | 0.248069 | 9.13E-07 | 8.19E-06 |
| C19ORF53  | 19p13.13 | -0.24807 | 9.13E-07 | 8.19E-06 |
| CALCA     | 11p15.2  | -0.24803 | 9.16E-07 | 8.21E-06 |
| DOCK8-AS1 | 9p24.3   | 0.248027 | 9.17E-07 | 8.22E-06 |
| GATA6     | 18q11.2  | 0.248    | 9.20E-07 | 8.23E-06 |
| TRIM10    | 6p22.1   | 0.248    | 9.20E-07 | 8.23E-06 |
| RNPS1     | 16p13.3  | -0.24797 | 9.22E-07 | 8.25E-06 |
| UQCRFS1   | 19q12    | 0.247935 | 9.26E-07 | 8.28E-06 |
| ANKLE1    | 19p13.11 | -0.24792 | 9.27E-07 | 8.29E-06 |
| ZNF610    | 19q13.41 | -0.24791 | 9.28E-07 | 8.29E-06 |
| NXF1      | 11q12.3  | -0.24791 | 9.28E-07 | 8.29E-06 |
| INPP5J    | 22q12.2  | -0.24782 | 9.37E-07 | 8.37E-06 |
| CCDC115   | 2q21.1   | -0.24779 | 9.40E-07 | 8.39E-06 |
| EXOC3L4   | 14q32.32 | 0.247754 | 9.43E-07 | 8.42E-06 |
| DPH7      | 9q34.3   | -0.2477  | 9.48E-07 | 8.46E-06 |
| ZMYM3     | Xq13.1   | -0.24764 | 9.55E-07 | 8.51E-06 |
| ERMARD    | 6q27     | -0.24758 | 9.61E-07 | 8.56E-06 |
| TCEAL1    | Xq22.2   | -0.24756 | 9.63E-07 | 8.57E-06 |
| USP18     | 22q11.21 | 0.247554 | 9.63E-07 | 8.57E-06 |
| GLOD4     | 17p13.3  | 0.247492 | 9.69E-07 | 8.63E-06 |
| MYBL2     | 20q13.12 | -0.24748 | 9.70E-07 | 8.63E-06 |
| COX7A1    | 19q13.12 | -0.24744 | 9.75E-07 | 8.67E-06 |
| RNF181    | 2p11.2   | -0.24742 | 9.77E-07 | 8.68E-06 |
| MYO1E     | 15q22.2  | 0.247384 | 9.80E-07 | 8.71E-06 |
| UNC50     | 2q11.2   | -0.24732 | 9.87E-07 | 8.76E-06 |
| NKRF      | Xq24     | -0.2473  | 9.89E-07 | 8.78E-06 |
| DNAJC28   | 21q22.11 | 0.247252 | 9.94E-07 | 8.82E-06 |
| OSBP      | 11q12.1  | 0.247241 | 9.95E-07 | 8.82E-06 |

|          |                 |          |          |          |
|----------|-----------------|----------|----------|----------|
| HS1BP3   | 2p24.1          | -0.24724 | 9.95E-07 | 8.82E-06 |
| HSPB6    | 19q13.12        | -0.24721 | 9.98E-07 | 8.84E-06 |
| UBE2D3   | 4q24            | 0.24721  | 9.98E-07 | 8.84E-06 |
| TMEM41A  | 3q27.2          | -0.2472  | 9.99E-07 | 8.84E-06 |
| ZNF337   | 20p11.21        | -0.24713 | 1.01E-06 | 8.90E-06 |
| TMEM50B  | 21q22.11        | 0.247112 | 1.01E-06 | 8.92E-06 |
| PLEKHH1  | 14q24.1         | 0.247066 | 1.01E-06 | 8.95E-06 |
| MAST3    | 19p13.11        | 0.247065 | 1.01E-06 | 8.95E-06 |
| H1FX-AS1 | 3q21.3          | -0.24703 | 1.02E-06 | 8.98E-06 |
| RGS9BP   | 19q13.11        | -0.24701 | 1.02E-06 | 8.99E-06 |
| FOLR1    | 11q13.4         | -0.247   | 1.02E-06 | 9.00E-06 |
| ATP2A2   | 12q24.11        | 0.246932 | 1.03E-06 | 9.06E-06 |
| LFNG     | 7p22.3          | -0.24688 | 1.03E-06 | 9.11E-06 |
| ALKBH5   | 17p11.2 17p11.2 | 0.246824 | 1.04E-06 | 9.15E-06 |
| MCL1     | 1q21.2          | 0.24682  | 1.04E-06 | 9.15E-06 |
| PLCD3    | 17q21.31        | 0.246779 | 1.04E-06 | 9.19E-06 |
| ORC2     | 2q33.1          | -0.24678 | 1.04E-06 | 9.19E-06 |
| CMPK1    | 1p33            | 0.246737 | 1.05E-06 | 9.22E-06 |
| ME1      | 6q14.2          | 0.246663 | 1.06E-06 | 9.29E-06 |
| TMEM220  | 17p13.1         | 0.246626 | 1.06E-06 | 9.32E-06 |
| SYTL1    | 1p36.11         | 0.246609 | 1.06E-06 | 9.33E-06 |
| SNCAIP   | 5q23.2          | -0.24657 | 1.07E-06 | 9.37E-06 |
| TTLL9    | 20q11.21        | -0.24654 | 1.07E-06 | 9.39E-06 |
| DSG2     | 18q12.1         | 0.246538 | 1.07E-06 | 9.39E-06 |
| ZDHHC22  | 14q24.3         | -0.24652 | 1.07E-06 | 9.40E-06 |
| ABHD2    | 15q26.1         | 0.246489 | 1.08E-06 | 9.43E-06 |
| SUMO1    | 2q33.1          | -0.24643 | 1.08E-06 | 9.48E-06 |
| LAMP2    | Xq24            | -0.24642 | 1.08E-06 | 9.48E-06 |
| GAN      | 16q23.2         | 0.246223 | 1.11E-06 | 9.68E-06 |
| RUVBL1   | 3q21.3          | -0.24619 | 1.11E-06 | 9.70E-06 |
| SLC50A1  | 1q22            | 0.24612  | 1.12E-06 | 9.77E-06 |
| NMNAT1   | 1p36.22         | 0.246075 | 1.12E-06 | 9.82E-06 |
| FMO5     | 1q21.1          | 0.245985 | 1.13E-06 | 9.90E-06 |
| FAM89B   | 11q13.1         | -0.24591 | 1.14E-06 | 9.98E-06 |
| SLC35D1  | 1p31.3          | 0.245901 | 1.14E-06 | 9.98E-06 |
| MTNR1A   | 4q35.2          | 0.24587  | 1.15E-06 | 1.00E-05 |
| EIF1AD   | 11q13.1         | -0.24578 | 1.16E-06 | 1.01E-05 |
| TBC1D16  | 17q25.3         | -0.24575 | 1.16E-06 | 1.01E-05 |
| KPNA6    | 1p35.2          | 0.245745 | 1.16E-06 | 1.01E-05 |
| ZNF569   | 19q13.12        | -0.24568 | 1.17E-06 | 1.02E-05 |
| CHN2     | 7p14.3          | -0.24558 | 1.18E-06 | 1.03E-05 |
| WDR5B    | 3q21.1          | -0.24556 | 1.18E-06 | 1.03E-05 |
| S100A2   | 1q21.3          | -0.24554 | 1.19E-06 | 1.03E-05 |
| EEF2KMT  | 16p13.3         | -0.24553 | 1.19E-06 | 1.03E-05 |
| PMS2P3   | 7q11.23         | -0.24548 | 1.19E-06 | 1.04E-05 |
| TVP23C   | 17p12           | 0.245474 | 1.19E-06 | 1.04E-05 |
| LRRC14   | 8q24.3          | -0.24541 | 1.20E-06 | 1.04E-05 |
| AMELX    | Xp22.2          | -0.24537 | 1.21E-06 | 1.05E-05 |
| RAPGEF3  | 12q13.11        | 0.245331 | 1.21E-06 | 1.05E-05 |
| SMG8     | 17q22           | -0.24532 | 1.21E-06 | 1.05E-05 |
| FBXW10   | 17p11.2         | 0.245292 | 1.22E-06 | 1.06E-05 |
| NIPAL3   | 1p36.11         | 0.245266 | 1.22E-06 | 1.06E-05 |
| ZNF470   | 19q13.43        | -0.24522 | 1.23E-06 | 1.06E-05 |
| KCNIP3   | 2q11.1          | -0.24521 | 1.23E-06 | 1.06E-05 |
| TUBB2A   | 6p25.2          | 0.245211 | 1.23E-06 | 1.06E-05 |
| TMEM43   | 3p25.1          | -0.24515 | 1.24E-06 | 1.07E-05 |
| FDX2     | 19p13.2         | -0.24514 | 1.24E-06 | 1.07E-05 |
| NARS     | 18q21.31        | 0.245093 | 1.24E-06 | 1.07E-05 |

|             |                 |          |          |          |
|-------------|-----------------|----------|----------|----------|
| USP53       | 4q26            | 0.245074 | 1.24E-06 | 1.08E-05 |
| NDUFV2      | 18p11.22        | 0.245061 | 1.25E-06 | 1.08E-05 |
| L3MBTL1     | 20q13.12        | -0.24505 | 1.25E-06 | 1.08E-05 |
| G3BP2       | 4q21.1          | 0.24502  | 1.25E-06 | 1.08E-05 |
| NAP1L1      | 12q21.2         | -0.24498 | 1.26E-06 | 1.08E-05 |
| MLLT11      | 1q21.3          | -0.24498 | 1.26E-06 | 1.08E-05 |
| CDC42EP4    | 17q25.1         | 0.244927 | 1.26E-06 | 1.09E-05 |
| ISG20       | 15q26.1         | 0.244858 | 1.27E-06 | 1.10E-05 |
| RLN2        | 9p24.1          | -0.24484 | 1.28E-06 | 1.10E-05 |
| SRL         | 16p13.3         | 0.24483  | 1.28E-06 | 1.10E-05 |
| BCL7C       | 16p11.2         | -0.24481 | 1.28E-06 | 1.10E-05 |
| CPNE7       | 16q24.3         | -0.24476 | 1.29E-06 | 1.11E-05 |
| ADRA1D      | 20p13           | -0.24474 | 1.29E-06 | 1.11E-05 |
| USP36       | 17q25.3         | -0.2447  | 1.29E-06 | 1.11E-05 |
| SSBP1       | 7q34            | -0.24464 | 1.30E-06 | 1.12E-05 |
| PTER        | 10p13           | 0.244545 | 1.31E-06 | 1.13E-05 |
| NDUFAF6     | 8q22.1          | -0.24452 | 1.32E-06 | 1.13E-05 |
| PITPNA      | 17p13.3         | 0.244483 | 1.32E-06 | 1.13E-05 |
| ATP6V0D1    | 16q22.1         | 0.244459 | 1.33E-06 | 1.14E-05 |
| SLC9A8      | 20q13.13        | -0.24444 | 1.33E-06 | 1.14E-05 |
| NPFFR1      | 10q22.1         | -0.24441 | 1.33E-06 | 1.14E-05 |
| THUMPD3-AS1 | 3p25.3          | -0.2444  | 1.33E-06 | 1.14E-05 |
| CCK         | 3p22.1          | 0.244287 | 1.35E-06 | 1.16E-05 |
| MECP2       | Xq28            | -0.24428 | 1.35E-06 | 1.16E-05 |
| TUBA1A      | 12q13.12        | -0.24425 | 1.35E-06 | 1.16E-05 |
| DDX10       | 11q22.3         | -0.24422 | 1.36E-06 | 1.16E-05 |
| TMEM249     | 8q24.3          | -0.24415 | 1.37E-06 | 1.17E-05 |
| CDC16       | 13q34           | -0.24414 | 1.37E-06 | 1.17E-05 |
| GALNS       | 16q24.3         | -0.24407 | 1.38E-06 | 1.18E-05 |
| CTDP1       | 18q23           | 0.244057 | 1.38E-06 | 1.18E-05 |
| SEC24B      | 4q25            | 0.244044 | 1.38E-06 | 1.18E-05 |
| SLC9A4      | 2q12.1          | 0.244002 | 1.39E-06 | 1.18E-05 |
| ARMCX6      | Xq22.1          | -0.24399 | 1.39E-06 | 1.19E-05 |
| CST6        | 11q13.1         | -0.2439  | 1.40E-06 | 1.20E-05 |
| MIER3       | 5q11.2          | 0.243861 | 1.41E-06 | 1.20E-05 |
| B3GALT1     | 2q24.3          | 0.243823 | 1.42E-06 | 1.20E-05 |
| PRRG4       | 11p13           | 0.243755 | 1.43E-06 | 1.21E-05 |
| TNFSF9      | 19p13.3         | 0.243728 | 1.43E-06 | 1.22E-05 |
| B4GALT4     | 3q13.32         | 0.243701 | 1.43E-06 | 1.22E-05 |
| ELL2        | 5q15            | 0.243678 | 1.44E-06 | 1.22E-05 |
| LINC00312   | 3p25.3          | -0.24365 | 1.44E-06 | 1.22E-05 |
| EXOC6       | 10q23.33        | 0.243538 | 1.46E-06 | 1.24E-05 |
| DLG3        | Xq13.1          | 0.243471 | 1.47E-06 | 1.25E-05 |
| SREBF1      | 17p11.2         | 0.243402 | 1.48E-06 | 1.25E-05 |
| KALRN       | 3q21.1-q21.2    | 0.243349 | 1.49E-06 | 1.26E-05 |
| WRNIP1      | 6p25.2          | -0.24331 | 1.49E-06 | 1.26E-05 |
| BEST2       | 19p13.13        | 0.243298 | 1.49E-06 | 1.27E-05 |
| WDR12       | 2q33.2          | -0.24323 | 1.50E-06 | 1.27E-05 |
| DEF8        | 16q24.3         | -0.24317 | 1.51E-06 | 1.28E-05 |
| LOC652276   | 16p13.3         | -0.24315 | 1.52E-06 | 1.28E-05 |
| GOLGA7B     | 10q24.2         | -0.24305 | 1.53E-06 | 1.30E-05 |
| RHOD        | 11q13.2         | -0.243   | 1.54E-06 | 1.30E-05 |
| C19ORF18    | 19q13.43        | -0.2428  | 1.57E-06 | 1.33E-05 |
| FHOD3       | 18q12.2         | -0.24267 | 1.59E-06 | 1.34E-05 |
| KRTAP3-3    | 17q21.2         | -0.24267 | 1.59E-06 | 1.34E-05 |
| LRRFIP1     | 2q37.3          | 0.242649 | 1.60E-06 | 1.35E-05 |
| IGFL4       | 19q13.32        | -0.24258 | 1.61E-06 | 1.35E-05 |
| ARHGAP21    | 10p12.1 10p12.3 | 0.242445 | 1.63E-06 | 1.37E-05 |

|           |               |          |          |          |
|-----------|---------------|----------|----------|----------|
| COMT      | 22q11.21      | -0.24242 | 1.63E-06 | 1.38E-05 |
| GAS2L1    | 22q12.2       | 0.242399 | 1.64E-06 | 1.38E-05 |
| TCF7L1    | 2p11.2        | -0.24238 | 1.64E-06 | 1.38E-05 |
| GOLGA8B   | 15q14         | -0.24235 | 1.64E-06 | 1.38E-05 |
| ARMC10    | 7q22.1        | -0.24235 | 1.65E-06 | 1.38E-05 |
| ENKUR     | 10p12.1       | 0.242321 | 1.65E-06 | 1.39E-05 |
| BRSK1     | 19q13.42      | -0.24231 | 1.65E-06 | 1.39E-05 |
| FAM45A    | 10q26.11      | 0.242246 | 1.66E-06 | 1.40E-05 |
| RBM28     | 7q32.1        | -0.24221 | 1.67E-06 | 1.40E-05 |
| SLC6A10P  | 16p11.2       | 0.24221  | 1.67E-06 | 1.40E-05 |
| KLF7      | 2q33.3        | -0.24213 | 1.68E-06 | 1.41E-05 |
| PTCD3     | 2p11.2        | -0.24213 | 1.68E-06 | 1.41E-05 |
| LRRC59    | 17q21.33      | 0.242113 | 1.68E-06 | 1.41E-05 |
| WBP4      | 13q14.11      | -0.24211 | 1.69E-06 | 1.41E-05 |
| KRT35     | 17q21.2       | -0.24208 | 1.69E-06 | 1.42E-05 |
| NR5A2     | 1q32.1        | 0.242021 | 1.70E-06 | 1.42E-05 |
| RBBP8     | 18q11.2       | 0.241994 | 1.71E-06 | 1.43E-05 |
| GGT6      | 17p13.2       | 0.241984 | 1.71E-06 | 1.43E-05 |
| EFCAB7    | 1p31.3        | -0.2419  | 1.72E-06 | 1.44E-05 |
| ZNF880    | 19q13.41      | -0.2419  | 1.72E-06 | 1.44E-05 |
| AP4M1     | 7q22.1        | -0.24187 | 1.73E-06 | 1.44E-05 |
| ARVCF     | 22q11.21      | -0.24185 | 1.73E-06 | 1.45E-05 |
| NFE2L3P2  | 17q21.32      | -0.24182 | 1.74E-06 | 1.45E-05 |
| FBXW5     | 9q34.3        | 0.241796 | 1.74E-06 | 1.45E-05 |
| PLEKHA4   | 19q13.33      | -0.24179 | 1.74E-06 | 1.45E-05 |
| HIPK2     | 7q34          | 0.241766 | 1.75E-06 | 1.46E-05 |
| ALDH3A1   | 17p11.2       | 0.241744 | 1.75E-06 | 1.46E-05 |
| SYN1      | Xp11.3-p11.23 | -0.24172 | 1.75E-06 | 1.46E-05 |
| COPS5     | 8q13.1        | -0.24169 | 1.76E-06 | 1.47E-05 |
| PHLPP1    | 18q21.33      | 0.241686 | 1.76E-06 | 1.47E-05 |
| ASNS      | 7q21.3        | -0.24166 | 1.76E-06 | 1.47E-05 |
| MED9      | 17p11.2       | 0.241651 | 1.77E-06 | 1.47E-05 |
| GCK       | 7p13          | -0.24163 | 1.77E-06 | 1.47E-05 |
| SPATC1L   | 21q22.3       | -0.24162 | 1.77E-06 | 1.47E-05 |
| PLAC1     | Xq26.3        | -0.24159 | 1.78E-06 | 1.48E-05 |
| RDX       | 11q22.3       | -0.24149 | 1.80E-06 | 1.49E-05 |
| ITGB4     | 17q25.1       | 0.241412 | 1.81E-06 | 1.50E-05 |
| CD2BP2    | 16p11.2       | -0.24141 | 1.81E-06 | 1.50E-05 |
| SPAST     | 2p22.3        | -0.24138 | 1.82E-06 | 1.51E-05 |
| ACSM1     | 16p12.3       | 0.241244 | 1.84E-06 | 1.53E-05 |
| CCDC106   | 19q13.42      | -0.24124 | 1.84E-06 | 1.53E-05 |
| PAIP1     | 5p12          | -0.24114 | 1.86E-06 | 1.54E-05 |
| POLR2F    | 22q13.1       | -0.24109 | 1.87E-06 | 1.55E-05 |
| IKZF3     | 17q12-q21.1   | 0.241055 | 1.88E-06 | 1.55E-05 |
| INO80B    | 2p13.1        | -0.24104 | 1.88E-06 | 1.55E-05 |
| PDCD6IP   | 3p22.3        | 0.240959 | 1.89E-06 | 1.57E-05 |
| ZNF43     | 19p12         | -0.24088 | 1.91E-06 | 1.58E-05 |
| TET1      | 10q21.3       | -0.24083 | 1.92E-06 | 1.59E-05 |
| VIL1      | 2q35          | -0.24083 | 1.92E-06 | 1.59E-05 |
| CDK8      | 13q12.13      | -0.24079 | 1.93E-06 | 1.59E-05 |
| AP5M1     | 14q22.3       | 0.240773 | 1.93E-06 | 1.59E-05 |
| POLR3F    | 20p11.23      | -0.24077 | 1.93E-06 | 1.59E-05 |
| CLOCK     | 4q12          | 0.240751 | 1.93E-06 | 1.60E-05 |
| TNFRSF13C | 22q13.2       | 0.240732 | 1.94E-06 | 1.60E-05 |
| GPM6B     | Xp22.2        | -0.2407  | 1.94E-06 | 1.60E-05 |
| SULT1A3   | 16p11.2       | 0.240699 | 1.94E-06 | 1.60E-05 |
| GAL       | 11q13.2       | -0.24069 | 1.95E-06 | 1.60E-05 |
| MAEA      | 4p16.3        | 0.240682 | 1.95E-06 | 1.60E-05 |

|           |              |          |          |          |
|-----------|--------------|----------|----------|----------|
| HINFP     | 11q23.3      | -0.24067 | 1.95E-06 | 1.60E-05 |
| INSM1     | 20p11.23     | 0.240528 | 1.98E-06 | 1.63E-05 |
| VSTM2B    | 19q12        | -0.24049 | 1.98E-06 | 1.63E-05 |
| MOCOS     | 18q12.2      | 0.240452 | 1.99E-06 | 1.64E-05 |
| KRT17     | 17q21.2      | -0.24045 | 1.99E-06 | 1.64E-05 |
| CADPS2    | 7q31.32      | 0.240427 | 2.00E-06 | 1.64E-05 |
| HGH1      | 8q24.3       | -0.24042 | 2.00E-06 | 1.64E-05 |
| PNMA2     | 8p21.2       | 0.240397 | 2.00E-06 | 1.64E-05 |
| ZNF566    | 19q13.12     | -0.2403  | 2.02E-06 | 1.66E-05 |
| MMAA      | 4q31.21      | 0.240272 | 2.03E-06 | 1.66E-05 |
| MLX       | 17q21.2      | 0.240156 | 2.05E-06 | 1.68E-05 |
| GYG1      | 3q24         | -0.24015 | 2.06E-06 | 1.68E-05 |
| TXNDCC9   | 2q11.2       | -0.24003 | 2.08E-06 | 1.70E-05 |
| ZNF558    | 19p13.2      | -0.24002 | 2.08E-06 | 1.70E-05 |
| CDHR2     | 5q35.2       | 0.239935 | 2.10E-06 | 1.72E-05 |
| SYNJ1     | 21q22.11     | 0.239871 | 2.11E-06 | 1.73E-05 |
| PDLIM4    | 5q31.1       | -0.23984 | 2.12E-06 | 1.73E-05 |
| GOLGA6L6  | 15q11.2      | -0.2398  | 2.13E-06 | 1.74E-05 |
| ICAM3     | 19p13.2      | 0.239707 | 2.15E-06 | 1.75E-05 |
| GYG2      | Xp22.33      | -0.2397  | 2.15E-06 | 1.75E-05 |
| CLP1      | 11q12.1      | -0.23968 | 2.15E-06 | 1.76E-05 |
| SHMT1     | 17p11.2      | 0.239669 | 2.16E-06 | 1.76E-05 |
| ANPEP     | 15q26.1      | 0.239603 | 2.17E-06 | 1.77E-05 |
| C11ORF1   | 11q23.1      | -0.23957 | 2.18E-06 | 1.78E-05 |
| CLASP1    | 2q14.2-q14.3 | -0.23954 | 2.18E-06 | 1.78E-05 |
| CCDC82    | 11q21        | -0.23953 | 2.19E-06 | 1.78E-05 |
| GFPT1     | 2p13.3       | 0.239479 | 2.20E-06 | 1.79E-05 |
| WWC1      | 5q34         | 0.239437 | 2.21E-06 | 1.80E-05 |
| STMN3     | 20q13.33     | -0.23938 | 2.22E-06 | 1.81E-05 |
| FBXL16    | 16p13.3      | 0.239379 | 2.22E-06 | 1.81E-05 |
| C20ORF204 | 20q13.33     | -0.23935 | 2.23E-06 | 1.81E-05 |
| PALM3     | 19p13.12     | -0.2393  | 2.24E-06 | 1.82E-05 |
| FSTL4     | 5q31.1       | -0.23918 | 2.26E-06 | 1.84E-05 |
| KCTD17    | 22q12.3      | -0.23917 | 2.27E-06 | 1.84E-05 |
| TRIB2     | 2p24.3       | 0.239146 | 2.27E-06 | 1.84E-05 |
| PCCB      | 3q22.3       | 0.239142 | 2.27E-06 | 1.84E-05 |
| AK1       | 9q34.11      | 0.239017 | 2.30E-06 | 1.87E-05 |
| WASF3     | 13q12.13     | -0.23899 | 2.31E-06 | 1.87E-05 |
| APOL6     | 22q12.3      | 0.238983 | 2.31E-06 | 1.87E-05 |
| RAB5B     | 12q13.2      | 0.238862 | 2.34E-06 | 1.89E-05 |
| ANKS4B    | 16p12.2      | 0.238847 | 2.34E-06 | 1.90E-05 |
| RHOT1     | 17q11.2      | -0.23883 | 2.35E-06 | 1.90E-05 |
| FTL       | 19q13.33     | -0.2388  | 2.35E-06 | 1.90E-05 |
| MRPS31    | 13q14.11     | -0.23879 | 2.35E-06 | 1.90E-05 |
| SIAH1     | 16q12.1      | -0.23877 | 2.36E-06 | 1.91E-05 |
| ADGRF3    | 2p23.3       | -0.23876 | 2.36E-06 | 1.91E-05 |
| FAM47E    | 4q21.1       | 0.238716 | 2.37E-06 | 1.92E-05 |
| SPATA2    | 20q13.13     | -0.23869 | 2.38E-06 | 1.92E-05 |
| NPDC1     | 9q34.3       | 0.238691 | 2.38E-06 | 1.92E-05 |
| PLIN2     | 9p22.1       | -0.23866 | 2.39E-06 | 1.92E-05 |
| PMS1      | 2q32.2       | -0.23863 | 2.39E-06 | 1.93E-05 |
| MMP17     | 12q24.33     | -0.23862 | 2.40E-06 | 1.93E-05 |
| FHL3      | 1p34.3       | -0.23856 | 2.41E-06 | 1.94E-05 |
| CRPPA     | 7p21.2       | -0.23854 | 2.42E-06 | 1.94E-05 |
| TIGD5     | 8q24.3       | -0.23852 | 2.42E-06 | 1.95E-05 |
| PDE4C     | 19p13.11     | 0.238445 | 2.44E-06 | 1.96E-05 |
| ATL3      | 11q13.1      | 0.238311 | 2.47E-06 | 1.99E-05 |
| MICALL2   | 7p22.3       | 0.238298 | 2.47E-06 | 1.99E-05 |



|          |                       |          |          |          |
|----------|-----------------------|----------|----------|----------|
| IL18     | 11q23.1               | 0.238262 | 2.48E-06 | 2.00E-05 |
| CA8      | 8q12.1                | 0.238257 | 2.48E-06 | 2.00E-05 |
| TRIM24   | 7q33-q34              | -0.23825 | 2.49E-06 | 2.00E-05 |
| GPR55    | 2q37.1                | 0.238234 | 2.49E-06 | 2.00E-05 |
| SNAPC5   | 15q22.31              | -0.23822 | 2.49E-06 | 2.00E-05 |
| BCAR3    | 1p22.1                | 0.238215 | 2.49E-06 | 2.00E-05 |
| ATP6V1F  | 7q32.1                | -0.23807 | 2.53E-06 | 2.03E-05 |
| RAD51D   | 17q12                 | -0.23806 | 2.53E-06 | 2.03E-05 |
| LAMA1    | 18p11.31              | 0.238058 | 2.53E-06 | 2.03E-05 |
| ZNF529   | 19q13.12              | -0.23804 | 2.54E-06 | 2.03E-05 |
| TSPAN2   | 1p13.2                | -0.2379  | 2.57E-06 | 2.06E-05 |
| ST13     | 22q13.2               | -0.23785 | 2.59E-06 | 2.07E-05 |
| RASAL1   | 12q24.13              | 0.237846 | 2.59E-06 | 2.07E-05 |
| CEP170B  | 14q32.33              | 0.237836 | 2.59E-06 | 2.07E-05 |
| CD3EAP   | 19q13.32              | -0.23771 | 2.62E-06 | 2.10E-05 |
| SLC25A37 | 8p21.2                | 0.237684 | 2.63E-06 | 2.10E-05 |
| PBX2     | 6p21.32               | -0.23767 | 2.63E-06 | 2.10E-05 |
| PAG1     | 8q21.13               | 0.237648 | 2.64E-06 | 2.11E-05 |
| KRT75    | 12q13.13              | -0.23763 | 2.64E-06 | 2.11E-05 |
| MCTS1    | Xq24                  | -0.23763 | 2.64E-06 | 2.11E-05 |
| PGM3     | 6q14.1                | 0.237629 | 2.64E-06 | 2.11E-05 |
| E2F3     | 6p22.3                | -0.23759 | 2.66E-06 | 2.12E-05 |
| LYSMD3   | 5q14.3                | 0.237428 | 2.70E-06 | 2.15E-05 |
| SLC7A6OS | 16q22.1               | -0.23742 | 2.70E-06 | 2.15E-05 |
| BYSL     | 6p21.1                | -0.23739 | 2.71E-06 | 2.16E-05 |
| ZSCAN18  | 19q13.43              | -0.23738 | 2.71E-06 | 2.16E-05 |
| LUZP1    | 1p36.12               | 0.237355 | 2.72E-06 | 2.16E-05 |
| CLTB     | 5q35.2                | 0.237318 | 2.73E-06 | 2.17E-05 |
| ELMOD3   | 2p11.2                | -0.23729 | 2.74E-06 | 2.17E-05 |
| CASP3    | 4q35.1                | 0.237186 | 2.76E-06 | 2.20E-05 |
|          | 8-Mar 10q11.21-q11.22 | 0.23716  | 2.77E-06 | 2.20E-05 |
| MAGEC1   | Xq27.2                | -0.23716 | 2.77E-06 | 2.20E-05 |
| ABCD1    | Xq28                  | -0.23715 | 2.77E-06 | 2.20E-05 |
| KCNQ1OT1 | 11p15.5               | -0.23714 | 2.78E-06 | 2.20E-05 |
| CCR9     | 3p21.31               | 0.237079 | 2.79E-06 | 2.21E-05 |
| SLC2A9   | 4p16.1                | -0.23706 | 2.80E-06 | 2.22E-05 |
| RAB3B    | 1p32.3                | 0.237046 | 2.80E-06 | 2.22E-05 |
| GABRE    | Xq28                  | -0.23702 | 2.81E-06 | 2.22E-05 |
| THOC6    | 16p13.3               | -0.23698 | 2.82E-06 | 2.23E-05 |
| ZBTB49   | 4p16.3                | -0.23698 | 2.82E-06 | 2.23E-05 |
| NRARP    | 9q34.3                | 0.236974 | 2.82E-06 | 2.23E-05 |
| ITGA3    | 17q21.33              | 0.236846 | 2.86E-06 | 2.26E-05 |
| ACP1     | 2p25.3                | -0.23681 | 2.87E-06 | 2.27E-05 |
| LGR5     | 12q21.1               | -0.2368  | 2.87E-06 | 2.27E-05 |
| OTUD6B   | 8q21.3                | -0.23674 | 2.89E-06 | 2.28E-05 |
| MRPL30   | 2q11.2                | -0.23664 | 2.92E-06 | 2.30E-05 |
| BMP7     | 20q13.31              | -0.23661 | 2.93E-06 | 2.31E-05 |
| SNHG6    | 8q13.1 8q13           | -0.23645 | 2.97E-06 | 2.34E-05 |
| TMEM40   | 3p25.2                | -0.23639 | 2.99E-06 | 2.36E-05 |
| ZCCHC24  | 10q22.3               | -0.23636 | 3.00E-06 | 2.36E-05 |
| CNDP2    | 18q22.3               | 0.236357 | 3.00E-06 | 2.36E-05 |
| ADCY3    | 2p23.3                | -0.23631 | 3.01E-06 | 2.37E-05 |
| ABHD5    | 3p21.33               | 0.23627  | 3.03E-06 | 2.38E-05 |
| PEX12    | 17q12                 | -0.23624 | 3.04E-06 | 2.39E-05 |
| DRGX     | 10q11.23              | 0.236237 | 3.04E-06 | 2.39E-05 |
| SLC6A20  | 3p21.31               | 0.236195 | 3.05E-06 | 2.40E-05 |
| ZNF319   | 16q21                 | -0.23619 | 3.05E-06 | 2.40E-05 |
| MYLK2    | 20q11.21              | -0.23613 | 3.07E-06 | 2.41E-05 |

|           |               |          |          |          |
|-----------|---------------|----------|----------|----------|
| TYSND1    | 10q22.1       | -0.23612 | 3.07E-06 | 2.41E-05 |
| UBXN1     | 11q12.3       | -0.23608 | 3.08E-06 | 2.42E-05 |
| ELL3      | 15q15.3       | 0.236038 | 3.10E-06 | 2.43E-05 |
| TNIP1     | 5q33.1        | 0.236008 | 3.11E-06 | 2.44E-05 |
| CNBD2     | 20q11.23      | -0.23594 | 3.13E-06 | 2.45E-05 |
| KCNQ4     | 1p34.2        | 0.235937 | 3.13E-06 | 2.45E-05 |
| EVI5      | 1p22.1        | 0.235934 | 3.13E-06 | 2.45E-05 |
| ZNF362    | 1p35.1        | -0.23591 | 3.14E-06 | 2.46E-05 |
| E2F4      | 16q22.1       | -0.23588 | 3.15E-06 | 2.46E-05 |
| EVI2B     | 17q11.2       | 0.235877 | 3.15E-06 | 2.46E-05 |
| SCNM1     | 1q21.3        | -0.23586 | 3.15E-06 | 2.47E-05 |
| C17ORF80  | 17q25.1       | -0.23585 | 3.16E-06 | 2.47E-05 |
| HSD17B10  | Xp11.22       | -0.23581 | 3.17E-06 | 2.48E-05 |
| ABCC4     | 13q32.1       | -0.23581 | 3.17E-06 | 2.48E-05 |
| PGRMC2    | 4q28.2        | 0.235777 | 3.18E-06 | 2.48E-05 |
| NAT16     | 7q22.1        | -0.23575 | 3.19E-06 | 2.49E-05 |
| SINHCAF   | 12p11.21      | -0.23571 | 3.20E-06 | 2.50E-05 |
| NARS2     | 11q14.1       | -0.23571 | 3.20E-06 | 2.50E-05 |
| HGD       | 3q13.33       | 0.23567  | 3.21E-06 | 2.50E-05 |
| RXRA      | 9q34.2        | 0.23566  | 3.22E-06 | 2.51E-05 |
| MSL3P1    | 2q37.1        | -0.23562 | 3.23E-06 | 2.51E-05 |
| ARIH2OS   | 3p21.31       | -0.23556 | 3.25E-06 | 2.53E-05 |
| RER1      | 1p36.32       | 0.23555  | 3.25E-06 | 2.53E-05 |
| DCHS2     | 4q31.3        | -0.23552 | 3.26E-06 | 2.54E-05 |
| HOXD9     | 2q31.1        | -0.23552 | 3.26E-06 | 2.54E-05 |
| IMPACT    | 18q11.2       | 0.235501 | 3.27E-06 | 2.54E-05 |
| CALCOCO2  | 17q21.32      | 0.235493 | 3.27E-06 | 2.54E-05 |
| AK4       | 1p31.3        | -0.23548 | 3.27E-06 | 2.54E-05 |
| ETAA1     | 2p14          | -0.23548 | 3.27E-06 | 2.54E-05 |
| SULT1C3   | 2q12.3        | 0.23546  | 3.28E-06 | 2.55E-05 |
| CCDC86    | 11q12.2       | -0.23543 | 3.29E-06 | 2.55E-05 |
| GNPTAB    | 12q23.2       | 0.235406 | 3.30E-06 | 2.56E-05 |
| KAT8      | 16p11.2       | -0.23537 | 3.31E-06 | 2.57E-05 |
| LOC148709 | 1q32.1        | -0.23536 | 3.31E-06 | 2.57E-05 |
| ADAT2     | 6q24.2        | -0.23534 | 3.32E-06 | 2.57E-05 |
| TRIQQ     | 8q22.1        | 0.235311 | 3.33E-06 | 2.58E-05 |
| ASB8      | 12q13.11      | 0.23531  | 3.33E-06 | 2.58E-05 |
| SLC38A11  | 2q24.3        | -0.23525 | 3.35E-06 | 2.59E-05 |
| RFX6      | 6q22.1        | 0.23518  | 3.37E-06 | 2.61E-05 |
| ERI1      | 8p23.1        | 0.235134 | 3.39E-06 | 2.62E-05 |
| STK38L    | 12p11.23      | -0.23508 | 3.41E-06 | 2.63E-05 |
| MB        | 22q12.3       | 0.235067 | 3.41E-06 | 2.63E-05 |
| SHARPIN   | 8q24.3        | -0.23495 | 3.45E-06 | 2.66E-05 |
| JARID2    | 6p22.3        | -0.23494 | 3.45E-06 | 2.66E-05 |
| MTF1      | 1p34.3        | 0.234885 | 3.47E-06 | 2.68E-05 |
| SLC15A1   | 13q32.2-q32.3 | -0.23483 | 3.49E-06 | 2.69E-05 |
| PAN3      | 13q12.2       | -0.23478 | 3.51E-06 | 2.70E-05 |
| CYP20A1   | 2q33.2        | -0.23477 | 3.51E-06 | 2.71E-05 |
| ACER2     | 9p22.1        | 0.234742 | 3.52E-06 | 2.71E-05 |
| LMX1A     | 1q23.3        | -0.23474 | 3.52E-06 | 2.71E-05 |
| NDRG3     | 20q11.23      | -0.23473 | 3.52E-06 | 2.71E-05 |
| AGGF1     | 5q13.3        | 0.234687 | 3.54E-06 | 2.72E-05 |
| SNRPG     | 2p13.3        | -0.23464 | 3.55E-06 | 2.74E-05 |
| OTUB1     | 11q13.1       | -0.23461 | 3.56E-06 | 2.74E-05 |
| PLB1      | 2p23.2        | -0.23461 | 3.57E-06 | 2.74E-05 |
| KLK3      | 19q13.33      | 0.234601 | 3.57E-06 | 2.74E-05 |
| TLCD1     | 17q11.2       | -0.23457 | 3.58E-06 | 2.75E-05 |
| ZKSCAN5   | 7q22.1        | -0.23456 | 3.58E-06 | 2.75E-05 |

|          |                   |          |          |          |
|----------|-------------------|----------|----------|----------|
| PAPOLG   | 2p16.1            | -0.2345  | 3.60E-06 | 2.77E-05 |
| CCRL2    | 3p21.31           | 0.234491 | 3.61E-06 | 2.77E-05 |
| OXT      | 20p13             | -0.23449 | 3.61E-06 | 2.77E-05 |
| PRDM11   | 11p11.2           | -0.23444 | 3.62E-06 | 2.78E-05 |
| NDUFAF3  | 3p21.31           | -0.23432 | 3.67E-06 | 2.81E-05 |
| CARM1    | 19p13.2           | -0.23432 | 3.67E-06 | 2.81E-05 |
| SEPTIN2  | 2q37.3            | -0.23424 | 3.70E-06 | 2.83E-05 |
| DGKZ     | 11p11.2           | -0.23421 | 3.71E-06 | 2.84E-05 |
| ALG10B   | 12q12             | -0.23413 | 3.74E-06 | 2.86E-05 |
| RABEP2   | 16p11.2           | -0.23405 | 3.77E-06 | 2.88E-05 |
| CEACAM7  | 19q13.2           | 0.233985 | 3.79E-06 | 2.90E-05 |
| C8ORF31  | 8q24.3            | -0.23396 | 3.80E-06 | 2.90E-05 |
| PPP1R2B  | 5q33.3            | -0.23393 | 3.81E-06 | 2.91E-05 |
| SPTBN5   | 15q15.1           | -0.2339  | 3.82E-06 | 2.92E-05 |
| CPNE5    | 6p21.2            | 0.23385  | 3.84E-06 | 2.93E-05 |
| LDB1     | 10q24.32          | -0.23385 | 3.84E-06 | 2.93E-05 |
| ANK1     | 8p11.21           | 0.233838 | 3.85E-06 | 2.94E-05 |
| TPT1-AS1 | 13q14.13          | -0.2338  | 3.86E-06 | 2.95E-05 |
| MUCL3    | 6p21.33           | 0.233784 | 3.87E-06 | 2.95E-05 |
| IZUMO2   | 19q13.33          | -0.2337  | 3.90E-06 | 2.97E-05 |
| FUT7     | 9q34.3            | -0.2337  | 3.90E-06 | 2.97E-05 |
| REM1     | 20q11.21          | -0.23364 | 3.92E-06 | 2.99E-05 |
| UBE2E1   | 3p24.2            | -0.23361 | 3.93E-06 | 2.99E-05 |
| SDCBP    | 8q12.1            | 0.233606 | 3.93E-06 | 2.99E-05 |
| SSR1     | 6p24.3            | 0.233592 | 3.94E-06 | 3.00E-05 |
| SGCB     | 4q12              | 0.233577 | 3.95E-06 | 3.00E-05 |
| TLE4     | 9q21.31           | 0.233532 | 3.96E-06 | 3.01E-05 |
| CMTM7    | 3p22.3            | -0.23351 | 3.97E-06 | 3.02E-05 |
| C2CD2L   | 11q23.3           | 0.23346  | 3.99E-06 | 3.03E-05 |
| NOL4L    | 20q11.21          | -0.23346 | 3.99E-06 | 3.03E-05 |
| GNL1     | 6p21.33           | -0.2334  | 4.01E-06 | 3.05E-05 |
| PYCR3    | 8q24.3            | -0.2334  | 4.01E-06 | 3.05E-05 |
| GPX7     | 1p32.3            | -0.23338 | 4.02E-06 | 3.05E-05 |
| MAPKAP1  | 9q33.3            | -0.23337 | 4.02E-06 | 3.05E-05 |
| CGN      | 1q21.3            | 0.23332  | 4.05E-06 | 3.07E-05 |
| HDDC2    | 6q22.31           | -0.23331 | 4.05E-06 | 3.07E-05 |
| MFSD6    | 2q32.2            | 0.233279 | 4.06E-06 | 3.08E-05 |
| ZC3H3    | 8q24.3            | -0.23309 | 4.14E-06 | 3.13E-05 |
| DLGAP4   | 20q11.23          | -0.23308 | 4.14E-06 | 3.13E-05 |
| TRIB3    | 20p13             | -0.23303 | 4.16E-06 | 3.15E-05 |
| RIC8B    | 12q23.3           | 0.232978 | 4.18E-06 | 3.16E-05 |
| PPP1R14B | 11q13.1           | -0.23293 | 4.20E-06 | 3.18E-05 |
| OLA1     | 2q31.1            | -0.2329  | 4.21E-06 | 3.18E-05 |
| GZF1     | 20p11.21          | -0.23286 | 4.23E-06 | 3.20E-05 |
| MGST3    | 1q24.1            | 0.232846 | 4.24E-06 | 3.20E-05 |
| PAFAH1B3 | 19q13.2           | -0.23267 | 4.31E-06 | 3.25E-05 |
| DUOXA2   | 15q21.1           | 0.232658 | 4.32E-06 | 3.26E-05 |
| EIF3B    | 7p22.3            | -0.23265 | 4.32E-06 | 3.26E-05 |
| RRN3P1   | 16p12.2           | -0.23256 | 4.36E-06 | 3.29E-05 |
| SCRIB    | 8q24.3            | -0.23253 | 4.37E-06 | 3.29E-05 |
| GK3P     | 4q32.3            | 0.232514 | 4.38E-06 | 3.30E-05 |
| ZNF174   | 16p13.3           | -0.23244 | 4.41E-06 | 3.32E-05 |
| DYNC111  | 7q21.3            | -0.23243 | 4.41E-06 | 3.32E-05 |
| TARBP1   | 1q42.2            | -0.2324  | 4.42E-06 | 3.33E-05 |
| TMEM138  | 11q12.2           | -0.2324  | 4.42E-06 | 3.33E-05 |
| OBP2B    | 9q34.2            | -0.23238 | 4.43E-06 | 3.33E-05 |
| LGI4     | 19q13.12 19q13.11 | -0.23232 | 4.46E-06 | 3.35E-05 |
| SARAF    | 8p12              | 0.232308 | 4.47E-06 | 3.36E-05 |

|            |          |          |          |          |
|------------|----------|----------|----------|----------|
| MAPK14     | 6p21.31  | -0.2323  | 4.47E-06 | 3.36E-05 |
| RPS6KL1    | 14q24.3  | -0.23229 | 4.47E-06 | 3.36E-05 |
| THSD1P1    | 13q14.3  | -0.23229 | 4.47E-06 | 3.36E-05 |
| PI4KA      | 22q11.21 | 0.232277 | 4.48E-06 | 3.36E-05 |
| USP27X     | Xp11.23  | -0.23222 | 4.50E-06 | 3.38E-05 |
| PGRMC1     | Xq24     | -0.23222 | 4.51E-06 | 3.38E-05 |
| TMEM144    | 4q32.1   | 0.232165 | 4.53E-06 | 3.39E-05 |
| C20ORF203  | 20q11.21 | -0.23216 | 4.53E-06 | 3.39E-05 |
| THOC7      | 3p14.1   | -0.23213 | 4.54E-06 | 3.40E-05 |
| FAM149A    | 4q35.1   | 0.232122 | 4.55E-06 | 3.40E-05 |
| RAB3A      | 19p13.11 | 0.232099 | 4.56E-06 | 3.41E-05 |
| ZNF92      | 7q11.21  | -0.23207 | 4.57E-06 | 3.42E-05 |
| ABO        | 9q34.2   | 0.232067 | 4.57E-06 | 3.42E-05 |
| FZD10      | 12q24.33 | -0.23206 | 4.58E-06 | 3.42E-05 |
| C10ORF12   | 10q24.1  | 0.232032 | 4.59E-06 | 3.43E-05 |
| TMEM131    | 2q11.2   | 0.23181  | 4.69E-06 | 3.50E-05 |
| PSMD14     | 2q24.2   | -0.23178 | 4.70E-06 | 3.51E-05 |
| NDP        | Xp11.3   | -0.23178 | 4.70E-06 | 3.51E-05 |
| CYTIP      | 2q24.1   | 0.231767 | 4.71E-06 | 3.51E-05 |
| SEL1L      | 14q31.1  | 0.231671 | 4.75E-06 | 3.54E-05 |
| TCTE3      | 6q27     | -0.2316  | 4.78E-06 | 3.57E-05 |
| NUDCD3     | 7p13     | -0.23158 | 4.79E-06 | 3.57E-05 |
| RTL8B      | Xq26.3   | -0.23149 | 4.83E-06 | 3.60E-05 |
| KPNA3      | 13q14.2  | -0.23145 | 4.85E-06 | 3.62E-05 |
| VKORC1     | 16p11.2  | -0.23141 | 4.87E-06 | 3.63E-05 |
| CCDC138    | 2q13     | -0.23137 | 4.89E-06 | 3.64E-05 |
| ZNF189     | 9q31.1   | 0.231345 | 4.90E-06 | 3.65E-05 |
| CATSPER2P1 | 15q15.3  | -0.23134 | 4.90E-06 | 3.65E-05 |
| WDR70      | 5p13.2   | -0.23134 | 4.91E-06 | 3.65E-05 |
| ANKRD45    | 1q25.1   | 0.231319 | 4.92E-06 | 3.65E-05 |
| UBAC2      | 13q32.3  | -0.23121 | 4.97E-06 | 3.69E-05 |
| CCNQ       | Xq28     | -0.2312  | 4.97E-06 | 3.69E-05 |
| ZC3H15     | 2q32.1   | -0.23114 | 5.00E-06 | 3.71E-05 |
| BSN        | 3p21.31  | -0.23113 | 5.00E-06 | 3.71E-05 |
| CHD7       | 8q12.2   | -0.23111 | 5.02E-06 | 3.72E-05 |
| GJB2       | 13q12.11 | 0.231064 | 5.04E-06 | 3.74E-05 |
| TTC39A     | 1p32.3   | 0.231037 | 5.05E-06 | 3.74E-05 |
| TUBE1      | 6q21     | -0.23102 | 5.06E-06 | 3.75E-05 |
| ING5       | 2q37.3   | -0.23096 | 5.09E-06 | 3.77E-05 |
| TSPOAP1    | 17q22    | -0.23094 | 5.10E-06 | 3.77E-05 |
| USP43      | 17p13.1  | 0.230937 | 5.10E-06 | 3.77E-05 |
| UXT        | Xp11.23  | -0.23093 | 5.10E-06 | 3.77E-05 |
| CNTD2      | 19q13.2  | 0.23087  | 5.13E-06 | 3.80E-05 |
| ASPH       | 8q12.3   | 0.230826 | 5.16E-06 | 3.81E-05 |
| RSPO4      | 20p13    | -0.23077 | 5.18E-06 | 3.83E-05 |
| C1ORF109   | 1p34.3   | -0.23071 | 5.21E-06 | 3.85E-05 |
| NSDHL      | Xq28     | -0.23067 | 5.23E-06 | 3.86E-05 |
| ZBTB8A     | 1p35.1   | 0.230649 | 5.24E-06 | 3.87E-05 |
| IP6K2      | 3p21.31  | -0.23064 | 5.25E-06 | 3.87E-05 |
| HAUS7      | Xq28     | -0.2306  | 5.27E-06 | 3.89E-05 |
| MLLT6      | 17q12    | -0.23056 | 5.29E-06 | 3.90E-05 |
| TTC19      | 17p12    | 0.230532 | 5.30E-06 | 3.91E-05 |
| CLRN3      | 10q26.2  | 0.23048  | 5.33E-06 | 3.93E-05 |
| TXNIP      | 1q21.1   | 0.230431 | 5.36E-06 | 3.94E-05 |
| ZKSCAN2    | 16p12.1  | -0.2304  | 5.37E-06 | 3.95E-05 |
| TMEM59     | 1p32.3   | 0.230378 | 5.38E-06 | 3.96E-05 |
| GP5M1      | 9q34.3   | -0.23035 | 5.40E-06 | 3.97E-05 |
| ASNSD1     | 2q32.2   | -0.23022 | 5.46E-06 | 4.02E-05 |

|           |          |          |          |          |
|-----------|----------|----------|----------|----------|
| CTU2      | 16q24.3  | -0.23017 | 5.49E-06 | 4.04E-05 |
| TRAF3IP2  | 6q21     | 0.230155 | 5.50E-06 | 4.04E-05 |
| C15ORF56  | 15q15.1  | -0.23015 | 5.50E-06 | 4.04E-05 |
| ABCC2     | 10q24.2  | -0.23014 | 5.51E-06 | 4.05E-05 |
| APOBEC4   | 1q25.3   | 0.230069 | 5.55E-06 | 4.07E-05 |
| UBXN8     | 8p12     | 0.230025 | 5.57E-06 | 4.09E-05 |
| LINC00323 | 21q22.2  | 0.230003 | 5.58E-06 | 4.09E-05 |
| PROSER1   | 13q13.3  | -0.22994 | 5.62E-06 | 4.12E-05 |
| L3HYPDH   | 14q23.1  | -0.22988 | 5.65E-06 | 4.14E-05 |
| CITED2    | 6q24.1   | 0.229763 | 5.71E-06 | 4.19E-05 |
| CALCB     | 11p15.2  | -0.22973 | 5.73E-06 | 4.20E-05 |
| PHOSPHO2  | 2q31.1   | -0.22966 | 5.77E-06 | 4.22E-05 |
| C10ORF62  | 10q24.2  | -0.22965 | 5.78E-06 | 4.23E-05 |
| NUP107    | 12q15    | -0.22963 | 5.78E-06 | 4.23E-05 |
| SLC7A6    | 16q22.1  | -0.22962 | 5.79E-06 | 4.24E-05 |
| POLR3E    | 16p12.2  | -0.2296  | 5.80E-06 | 4.24E-05 |
| DCAF4     | 14q24.2  | -0.2296  | 5.80E-06 | 4.24E-05 |
| PSMA1     | 11p15.2  | -0.22958 | 5.81E-06 | 4.25E-05 |
| PEA15     | 1q23.2   | -0.22958 | 5.81E-06 | 4.25E-05 |
| C12ORF76  | 12q24.11 | -0.22956 | 5.82E-06 | 4.25E-05 |
| TUBD1     | 17q23.1  | -0.22952 | 5.85E-06 | 4.27E-05 |
| MYO7A     | 11q13.5  | -0.22948 | 5.87E-06 | 4.28E-05 |
| KLF9      | 9q21.12  | 0.229424 | 5.90E-06 | 4.30E-05 |
| ANKH      | 5p15.2   | -0.22942 | 5.90E-06 | 4.30E-05 |
| CACHD1    | 1p31.3   | -0.22937 | 5.93E-06 | 4.32E-05 |
| TIMM50    | 19q13.2  | -0.22936 | 5.93E-06 | 4.32E-05 |
| RPRM      | 2q23.3   | -0.22935 | 5.95E-06 | 4.33E-05 |
| SCAMP1    | 5q14.1   | 0.229216 | 6.02E-06 | 4.38E-05 |
| RPP30     | 10q23.31 | -0.22913 | 6.07E-06 | 4.42E-05 |
| PRPF3     | 1q21.2   | -0.22909 | 6.09E-06 | 4.43E-05 |
| GNPDA1    | 5q31.3   | -0.22907 | 6.10E-06 | 4.44E-05 |
| TMEM30A   | 6q14.1   | 0.229064 | 6.11E-06 | 4.44E-05 |
| TAPBP     | 6p21.32  | 0.229041 | 6.12E-06 | 4.45E-05 |
| SCARB1    | 12q24.31 | -0.22902 | 6.14E-06 | 4.46E-05 |
| KLHDC8B   | 3p21.31  | -0.22901 | 6.14E-06 | 4.46E-05 |
| DUOX1     | 15q21.1  | 0.229011 | 6.14E-06 | 4.46E-05 |
| WDR43     | 2p23.2   | -0.22891 | 6.20E-06 | 4.50E-05 |
| IAH1      | 2p25.1   | -0.2289  | 6.20E-06 | 4.50E-05 |
| P4HB      | 17q25.3  | 0.228855 | 6.23E-06 | 4.52E-05 |
| EIF3E     | 8q23.1   | -0.22882 | 6.25E-06 | 4.53E-05 |
| C2ORF68   | 2p11.2   | -0.22876 | 6.29E-06 | 4.55E-05 |
| MAP6      | 11q13.5  | -0.22876 | 6.29E-06 | 4.55E-05 |
| BREA2     | 8q24.3   | -0.22871 | 6.32E-06 | 4.57E-05 |
| GIT1      | 17q11.2  | -0.22869 | 6.33E-06 | 4.58E-05 |
| LBH       | 2p23.1   | -0.22868 | 6.34E-06 | 4.59E-05 |
| CCNJ      | 10q24.1  | -0.22867 | 6.34E-06 | 4.59E-05 |
| DNAJC1    | 10p12.31 | 0.228671 | 6.34E-06 | 4.59E-05 |
| POLR2J    | 7q22.1   | -0.2286  | 6.39E-06 | 4.62E-05 |
| BOP1      | 8q24.3   | -0.22858 | 6.40E-06 | 4.62E-05 |
| SLC22A4   | 5q31.1   | -0.22858 | 6.40E-06 | 4.62E-05 |
| ARAP2     | 4p14     | 0.228503 | 6.44E-06 | 4.65E-05 |
| POGLUT2   | 13q33.1  | -0.22846 | 6.47E-06 | 4.67E-05 |
| EEPD1     | 7p14.2   | -0.22844 | 6.49E-06 | 4.68E-05 |
| TYMSOS    | 18p11.32 | 0.228381 | 6.52E-06 | 4.70E-05 |
| RPL23AP7  | 2q14.1   | -0.22837 | 6.53E-06 | 4.70E-05 |
| SWSAP1    | 19p13.2  | -0.22836 | 6.54E-06 | 4.71E-05 |
| ADH1C     | 4q23     | 0.228318 | 6.56E-06 | 4.73E-05 |
| BROX      | 1q41     | 0.228282 | 6.58E-06 | 4.74E-05 |

|            |          |          |          |          |
|------------|----------|----------|----------|----------|
| FGF7P3     | 9p12     | -0.22827 | 6.59E-06 | 4.74E-05 |
| ALOXE3     | 17p13.1  | 0.228239 | 6.61E-06 | 4.76E-05 |
| ST3GAL3    | 1p34.1   | -0.22822 | 6.62E-06 | 4.76E-05 |
| NRF1       | 7q32.2   | -0.22812 | 6.69E-06 | 4.81E-05 |
| ABHD16B    | 20q13.33 | -0.2281  | 6.70E-06 | 4.81E-05 |
| ZNF875     | 19q13.12 | -0.228   | 6.76E-06 | 4.86E-05 |
| IFNLR1     | 1p36.11  | -0.22797 | 6.78E-06 | 4.87E-05 |
| SYTL4      | Xq22.1   | 0.227958 | 6.79E-06 | 4.88E-05 |
| POMGNT1    | 1p34.1   | -0.22791 | 6.82E-06 | 4.90E-05 |
| ECEL1      | 2q37.1   | -0.22788 | 6.84E-06 | 4.91E-05 |
| GLIS3      | 9p24.2   | 0.227841 | 6.87E-06 | 4.92E-05 |
| JCHAIN     | 4q13.3   | 0.227837 | 6.87E-06 | 4.92E-05 |
| CCNG2      | 4q21.1   | 0.227757 | 6.92E-06 | 4.96E-05 |
| CBLN1      | 16q12.1  | -0.22775 | 6.92E-06 | 4.96E-05 |
| NDUFB11    | Xp11.3   | -0.22774 | 6.93E-06 | 4.96E-05 |
| PSMG1      | 21q22.2  | -0.22768 | 6.97E-06 | 4.99E-05 |
| PHKA2      | Xp22.13  | -0.22766 | 6.99E-06 | 5.00E-05 |
| CC2D2A     | 4p15.32  | -0.22763 | 7.00E-06 | 5.01E-05 |
| NAALADL2   | 3q26.31  | -0.2276  | 7.03E-06 | 5.03E-05 |
| ZNF26      | 12q24.33 | -0.22757 | 7.05E-06 | 5.04E-05 |
| MRNIP      | 5q35.3   | -0.22756 | 7.05E-06 | 5.04E-05 |
| UGT2B15    | 4q13.2   | 0.227532 | 7.07E-06 | 5.05E-05 |
| FAM151B    | 5q14.1   | 0.227505 | 7.09E-06 | 5.06E-05 |
| NRSN2      | 20p13    | -0.22743 | 7.14E-06 | 5.10E-05 |
| LEXM       | 1p32.3   | 0.227415 | 7.15E-06 | 5.10E-05 |
| RPL37A     | 2q35     | -0.22738 | 7.17E-06 | 5.12E-05 |
| TTC14      | 3q26.33  | -0.22735 | 7.19E-06 | 5.13E-05 |
| MFSD4A-AS1 | 1q32.1   | 0.227348 | 7.20E-06 | 5.13E-05 |
| XPNPEP2    | Xq26.1   | -0.22733 | 7.21E-06 | 5.14E-05 |
| TCN2       | 22q12.2  | 0.227252 | 7.26E-06 | 5.17E-05 |
| TCF19      | 6p21.33  | 0.227232 | 7.28E-06 | 5.18E-05 |
| TATDN2     | 3p25.3   | -0.22723 | 7.28E-06 | 5.18E-05 |
| RPS3       | 11q13.4  | -0.22719 | 7.30E-06 | 5.20E-05 |
| FAM83B     | 6p12.1   | 0.227177 | 7.31E-06 | 5.20E-05 |
| CSNK1A1    | 5q32     | 0.227152 | 7.33E-06 | 5.21E-05 |
| RAB11FIP3  | 16p13.3  | -0.22709 | 7.37E-06 | 5.24E-05 |
| SAMD7      | 3q26.2   | 0.227054 | 7.40E-06 | 5.26E-05 |
| FAM177A1   | 14q13.2  | 0.227022 | 7.42E-06 | 5.27E-05 |
| DNAH17     | 17q25.3  | -0.22696 | 7.46E-06 | 5.30E-05 |
| AMOTL2     | 3q22.2   | -0.22694 | 7.48E-06 | 5.31E-05 |
| IQCG       | 3q29     | 0.226907 | 7.50E-06 | 5.33E-05 |
| RGCC       | 13q14.11 | -0.22689 | 7.52E-06 | 5.33E-05 |
| GRIN3A     | 9q31.1   | 0.226871 | 7.53E-06 | 5.34E-05 |
| FAM45BP    | Xq26.1   | 0.226832 | 7.56E-06 | 5.36E-05 |
| POLD3      | 11q13.4  | 0.226808 | 7.57E-06 | 5.37E-05 |
| TSEN34     | 19q13.42 | -0.22679 | 7.59E-06 | 5.38E-05 |
| TPSG1      | 16p13.3  | 0.226765 | 7.61E-06 | 5.39E-05 |
| ELOVL5     | 6p12.1   | -0.22675 | 7.62E-06 | 5.39E-05 |
| SAMD9      | 7q21.2   | 0.226688 | 7.66E-06 | 5.42E-05 |
| CMTR1      | 6p21.2   | -0.22668 | 7.67E-06 | 5.42E-05 |
| HMGCR      | 5q13.3   | 0.226541 | 7.77E-06 | 5.49E-05 |
| NEURL1     | 10q24.33 | 0.226541 | 7.77E-06 | 5.49E-05 |
| CLCA1      | 1p22.3   | 0.226506 | 7.79E-06 | 5.51E-05 |
| CDCA7      | 2q31.1   | -0.2265  | 7.80E-06 | 5.51E-05 |
| DND1       | 5q31.3   | 0.226459 | 7.83E-06 | 5.53E-05 |
| PAQR7      | 1p36.11  | -0.2264  | 7.87E-06 | 5.56E-05 |
| C20ORF27   | 20p13    | -0.22633 | 7.93E-06 | 5.59E-05 |
| WDR33      | 2q14.3   | -0.22632 | 7.94E-06 | 5.60E-05 |

|           |               |          |          |          |
|-----------|---------------|----------|----------|----------|
| ACTR3B    | 7q36.1-q36.2  | -0.2263  | 7.95E-06 | 5.61E-05 |
| GMEB1     | 1p35.3        | 0.226273 | 7.97E-06 | 5.62E-05 |
| DNPEP     | 2q35          | -0.22626 | 7.98E-06 | 5.62E-05 |
| SULT1B1   | 4q13.3        | 0.226163 | 8.05E-06 | 5.67E-05 |
| PLEKHB1   | 11q13.4       | -0.22615 | 8.06E-06 | 5.68E-05 |
| ZFP1      | 16q23.1       | -0.22613 | 8.07E-06 | 5.68E-05 |
| APOC2     | 19q13.32      | -0.22609 | 8.11E-06 | 5.71E-05 |
| CASP1     | 11q22.3       | 0.226077 | 8.12E-06 | 5.71E-05 |
| DUSP6     | 12q21.33      | 0.226069 | 8.12E-06 | 5.71E-05 |
| TEX30     | 13q33.1       | -0.22606 | 8.13E-06 | 5.71E-05 |
| AGL       | 1p21.2        | 0.226052 | 8.14E-06 | 5.72E-05 |
| SFXN2     | 10q24.32      | 0.226017 | 8.16E-06 | 5.73E-05 |
| LUC7L     | 16p13.3       | -0.22601 | 8.17E-06 | 5.74E-05 |
| FUNDC1    | Xp11.3        | -0.226   | 8.18E-06 | 5.74E-05 |
| C11ORF68  | 11q13.1       | -0.22595 | 8.21E-06 | 5.76E-05 |
| SOGA1     | 20q11.23      | -0.22592 | 8.24E-06 | 5.78E-05 |
| CEP192    | 18p11.21      | 0.225912 | 8.25E-06 | 5.78E-05 |
| PDCD2     | 6q27          | -0.22589 | 8.27E-06 | 5.79E-05 |
| RPL23     | 17q12         | -0.22588 | 8.27E-06 | 5.80E-05 |
| IPCEF1    | 6q25.2        | 0.225875 | 8.27E-06 | 5.80E-05 |
| LINC00174 | 7q11.21       | -0.22587 | 8.28E-06 | 5.80E-05 |
| CAD       | 2p23.3        | -0.22585 | 8.29E-06 | 5.80E-05 |
| BNIP3     | 10q26.3       | -0.22585 | 8.29E-06 | 5.80E-05 |
| SWAP70    | 11p15.4       | 0.225825 | 8.31E-06 | 5.82E-05 |
| SLC26A10  | 12q13.3       | -0.22582 | 8.32E-06 | 5.82E-05 |
| NEK3      | 13q14.3       | -0.22578 | 8.35E-06 | 5.84E-05 |
| DYM       | 18q21.1       | 0.225741 | 8.38E-06 | 5.86E-05 |
| FCMR      | 1q32.1        | 0.225689 | 8.42E-06 | 5.88E-05 |
| RAB3IL1   | 11q12.2-q12.3 | -0.22564 | 8.46E-06 | 5.91E-05 |
| LRRC14B   | 5p15.33       | -0.2256  | 8.49E-06 | 5.93E-05 |
| DHX32     | 10q26.2       | 0.22548  | 8.59E-06 | 5.99E-05 |
| TMF1      | 3p14.1        | 0.225456 | 8.61E-06 | 6.00E-05 |
| SAYSD1    | 6p21.2        | -0.22543 | 8.63E-06 | 6.02E-05 |
| MRPL40    | 22q11.21      | -0.22542 | 8.64E-06 | 6.02E-05 |
| CD244     | 1q23.3        | 0.225415 | 8.64E-06 | 6.02E-05 |
| CD2AP     | 6p12.3        | 0.225365 | 8.68E-06 | 6.05E-05 |
| SLC1A4    | 2p14          | -0.22536 | 8.69E-06 | 6.05E-05 |
| NOL8      | 9q22.31       | -0.22531 | 8.72E-06 | 6.07E-05 |
| ASAP3     | 1p36.12       | 0.225293 | 8.74E-06 | 6.08E-05 |
| NEBL      | 10p12.31      | -0.22526 | 8.77E-06 | 6.10E-05 |
| RBM48     | 7q21.2        | -0.22525 | 8.78E-06 | 6.11E-05 |
| SERINC4   | 15q15.3       | 0.22521  | 8.81E-06 | 6.12E-05 |
| GPR83     | 11q21         | -0.2252  | 8.82E-06 | 6.13E-05 |
| PFN4      | 2p23.3        | -0.22518 | 8.83E-06 | 6.14E-05 |
| AGPAT4    | 6q26          | 0.225178 | 8.84E-06 | 6.14E-05 |
| C9ORF129  | 9q22.31       | 0.225141 | 8.87E-06 | 6.16E-05 |
| PFN2      | 3q25.1        | -0.22514 | 8.87E-06 | 6.16E-05 |
| GCC2      | 2q12.3        | 0.225107 | 8.90E-06 | 6.17E-05 |
| CS        | 12q13.3       | 0.225107 | 8.90E-06 | 6.17E-05 |
| RPL31     | 2q11.2        | -0.22509 | 8.91E-06 | 6.18E-05 |
| UBL4A     | Xq28          | -0.22503 | 8.96E-06 | 6.21E-05 |
| SCO1      | 17p13.1       | 0.224943 | 9.03E-06 | 6.26E-05 |
| BTN3A1    | 6p22.2        | 0.224934 | 9.04E-06 | 6.26E-05 |
| PTK2      | 8q24.3        | -0.22493 | 9.04E-06 | 6.26E-05 |
| FUNDC2P2  | 2p11.2        | -0.22492 | 9.05E-06 | 6.27E-05 |
| CRACR2A   | 12p13.32      | 0.224861 | 9.10E-06 | 6.30E-05 |
| MIIP      | 1p36.22       | -0.22481 | 9.15E-06 | 6.32E-05 |
| SLC22A17  | 14q11.2       | -0.22478 | 9.17E-06 | 6.34E-05 |

|          |                 |          |          |          |
|----------|-----------------|----------|----------|----------|
| GP2      | 16p12.3         | 0.224775 | 9.18E-06 | 6.34E-05 |
| WWC2     | 4q35.1          | -0.22477 | 9.18E-06 | 6.34E-05 |
| GEMIN4   | 17p13.3         | 0.224756 | 9.20E-06 | 6.35E-05 |
| SERPINH1 | 11q13.5         | -0.22474 | 9.21E-06 | 6.36E-05 |
| LZTS2    | 10q24.31        | -0.22472 | 9.23E-06 | 6.37E-05 |
| ILKAP    | 2q37.3          | -0.22467 | 9.27E-06 | 6.39E-05 |
| NR2C2AP  | 19p13.11        | -0.22463 | 9.31E-06 | 6.42E-05 |
| APH1B    | 15q22.2         | -0.2245  | 9.42E-06 | 6.50E-05 |
| PDLIM1   | 10q23.33        | 0.224475 | 9.44E-06 | 6.51E-05 |
| RSPH14   | 22q11.22-q11.23 | -0.22442 | 9.49E-06 | 6.54E-05 |
| WDPCP    | 2p15            | -0.22442 | 9.49E-06 | 6.54E-05 |
| RAVER2   | 1p31.3          | 0.224414 | 9.50E-06 | 6.54E-05 |
| VPS54    | 2p15-p14        | -0.22429 | 9.60E-06 | 6.61E-05 |
| FAM8A1   | 6p22.3          | 0.224268 | 9.63E-06 | 6.62E-05 |
| DDX1     | 2p24.3          | -0.22426 | 9.64E-06 | 6.63E-05 |
| RAP1B    | 12q15           | 0.224245 | 9.65E-06 | 6.63E-05 |
| PI3      | 20q13.12        | 0.224245 | 9.65E-06 | 6.63E-05 |
| OBSL1    | 2q35            | -0.22423 | 9.66E-06 | 6.64E-05 |
| TRMT6    | 20p12.3         | -0.22415 | 9.74E-06 | 6.69E-05 |
| GRAMD4   | 22q13.31        | 0.224126 | 9.75E-06 | 6.70E-05 |
| KIF6     | 6p21.2          | -0.22409 | 9.79E-06 | 6.72E-05 |
| POT1     | 7q31.33         | -0.22407 | 9.81E-06 | 6.73E-05 |
| CNPY3    | 6p21.1          | -0.22404 | 9.83E-06 | 6.74E-05 |
| RPS27L   | 15q22.2         | 0.224039 | 9.83E-06 | 6.74E-05 |
| PTPRE    | 10q26.2         | 0.224016 | 9.86E-06 | 6.75E-05 |
| ZNF438   | 10p11.23        | 0.224012 | 9.86E-06 | 6.76E-05 |
| AP2B1    | 17q12           | 0.224001 | 9.87E-06 | 6.76E-05 |
| DMBX1    | 1p33            | 0.223976 | 9.89E-06 | 6.77E-05 |
| ASPN     | 9q22.31         | -0.22396 | 9.91E-06 | 6.78E-05 |
| KLB      | 4p14            | 0.223949 | 9.92E-06 | 6.79E-05 |
| CABYR    | 18q11.2         | -0.22393 | 9.93E-06 | 6.79E-05 |
| ZCCHC3   | 20p13           | -0.22391 | 9.96E-06 | 6.81E-05 |
| PFKL     | 21q22.3         | 0.223898 | 9.97E-06 | 6.81E-05 |
| HS6ST1   | 2q14.3          | -0.22389 | 9.98E-06 | 6.82E-05 |
| RAB22A   | 20q13.32        | -0.22387 | 9.99E-06 | 6.82E-05 |
| PRSS45P  | 3p21.31         | -0.22383 | 1.00E-05 | 6.85E-05 |
| HOXA2    | 7p15.2          | -0.22382 | 1.00E-05 | 6.85E-05 |
| MMUT     | 6p12.3          | 0.223797 | 1.01E-05 | 6.86E-05 |
| RAB35    | 12q24.23        | 0.223794 | 1.01E-05 | 6.86E-05 |
| HMGB3    | Xq28            | -0.22375 | 1.01E-05 | 6.89E-05 |
| ZNRD1    | 6p22.1          | -0.22368 | 1.02E-05 | 6.93E-05 |
| NUP42    | 7p15.3          | -0.22363 | 1.02E-05 | 6.96E-05 |
| KCNH3    | 12q13.12        | -0.2236  | 1.02E-05 | 6.98E-05 |
| RHCG     | 15q26.1         | -0.22357 | 1.03E-05 | 7.00E-05 |
| CDKL1    | 14q21.3         | 0.223563 | 1.03E-05 | 7.00E-05 |
| TEPSIN   | 17q25.3         | -0.22353 | 1.03E-05 | 7.02E-05 |
| ZNF512B  | 20q13.33        | -0.22353 | 1.03E-05 | 7.02E-05 |
| ANKS3    | 16p13.3         | -0.22352 | 1.03E-05 | 7.02E-05 |
| SLC45A3  | 1q32.1          | 0.223449 | 1.04E-05 | 7.07E-05 |
| HIST4H4  | 12p12.3         | -0.22342 | 1.04E-05 | 7.08E-05 |
| RMC1     | 18q11.2         | 0.223418 | 1.04E-05 | 7.08E-05 |
| BCORL1   | Xq26.1          | -0.2234  | 1.04E-05 | 7.09E-05 |
| NDUFA9   | 12p13.32        | 0.223346 | 1.05E-05 | 7.12E-05 |
| TSPAN14  | 10q23.1         | 0.223342 | 1.05E-05 | 7.12E-05 |
| GPR155   | 2q31.1          | -0.22333 | 1.05E-05 | 7.13E-05 |
| PRAP1    | 10q26.3         | -0.22332 | 1.05E-05 | 7.13E-05 |
| ZMAT5    | 22q12.2         | -0.22331 | 1.05E-05 | 7.14E-05 |
| CACNA1D  | 3p21.1          | -0.22326 | 1.06E-05 | 7.17E-05 |



|           |                     |          |          |          |
|-----------|---------------------|----------|----------|----------|
| CPSF1     | 8q24.3              | -0.22325 | 1.06E-05 | 7.17E-05 |
| CRYM-AS1  | 16p12.2             | -0.22323 | 1.06E-05 | 7.18E-05 |
| RCN3      | 19q13.33            | -0.22316 | 1.07E-05 | 7.23E-05 |
| OTUB2     | 14q32.12            | 0.223133 | 1.07E-05 | 7.25E-05 |
| NAT8      | 2p13.1              | 0.223111 | 1.07E-05 | 7.26E-05 |
| MAF1      | 8q24.3              | -0.22305 | 1.08E-05 | 7.30E-05 |
| MLLT10    | 10p12.31            | -0.22304 | 1.08E-05 | 7.30E-05 |
| KIR3DL2   | 19q13.42            | 0.22298  | 1.09E-05 | 7.34E-05 |
| SLC25A32  | 8q22.3              | -0.22296 | 1.09E-05 | 7.35E-05 |
| ANXA2P2   | 9p13.3              | 0.222938 | 1.09E-05 | 7.36E-05 |
| AGAP2     | 12q14.1             | 0.222934 | 1.09E-05 | 7.36E-05 |
| LINC00324 | 17p13.1             | 0.222905 | 1.09E-05 | 7.38E-05 |
| INPP5K    | 17p13.3             | 0.222882 | 1.10E-05 | 7.39E-05 |
| WASH8P    | 12p13.33            | -0.22285 | 1.10E-05 | 7.42E-05 |
| SUMO1P3   | 1q23.2              | -0.22278 | 1.11E-05 | 7.46E-05 |
| C8ORF44   | 8q13.1              | -0.22278 | 1.11E-05 | 7.46E-05 |
| ASB3      | 2p16.2              | -0.22274 | 1.11E-05 | 7.48E-05 |
| PPP2R3B   | Xp22.33 and Yp11.31 | -0.22272 | 1.11E-05 | 7.49E-05 |
| C7ORF25   | 7p14.1              | -0.22271 | 1.11E-05 | 7.50E-05 |
| RRAGB     | Xp11.21             | -0.22264 | 1.12E-05 | 7.55E-05 |
| KDM1A     | 1p36.12             | -0.22259 | 1.13E-05 | 7.58E-05 |
| FAM162A   | 3q21.1              | 0.222553 | 1.13E-05 | 7.60E-05 |
| NME1      | 17q21.33            | -0.22253 | 1.13E-05 | 7.62E-05 |
| PIGS      | 17q11.2             | 0.222516 | 1.13E-05 | 7.62E-05 |
| AFDN-DT   | 6q27                | -0.2225  | 1.14E-05 | 7.63E-05 |
| PAFAH1B1  | 17p13.3             | 0.222396 | 1.15E-05 | 7.70E-05 |
| ESPNL     | 2q37.3              | -0.22231 | 1.16E-05 | 7.76E-05 |
| DMXL2     | 15q21.2             | 0.222276 | 1.16E-05 | 7.78E-05 |
| SPTSSB    | 3q26.1              | 0.222274 | 1.16E-05 | 7.78E-05 |
| ZNF263    | 16p13.3             | -0.22227 | 1.16E-05 | 7.78E-05 |
| EGLN1     | 1q42.2              | 0.222247 | 1.16E-05 | 7.80E-05 |
| PABPC4    | 1p34.3              | -0.22224 | 1.16E-05 | 7.80E-05 |
| ZNF107    | 7q11.21             | -0.22223 | 1.16E-05 | 7.80E-05 |
| B2M       | 15q21.1             | 0.222225 | 1.16E-05 | 7.81E-05 |
| PKLR      | 1q22                | -0.22221 | 1.17E-05 | 7.82E-05 |
| CAPN3     | 15q15.1             | -0.2222  | 1.17E-05 | 7.82E-05 |
| CNOT6L    | 4q21.1              | 0.222196 | 1.17E-05 | 7.82E-05 |
| B3GNT7    | 2q37.1 2q37.1       | 0.22213  | 1.18E-05 | 7.86E-05 |
| NOP58     | 2q33.1              | -0.22202 | 1.19E-05 | 7.94E-05 |
| SURF2     | 9q34.2              | -0.22201 | 1.19E-05 | 7.95E-05 |
| MAP2K1    | 15q22.31            | 0.22198  | 1.19E-05 | 7.97E-05 |
| AQP7P1    | 9q13                | -0.22196 | 1.19E-05 | 7.98E-05 |
| TMEM102   | 17p13.1             | 0.221881 | 1.20E-05 | 8.03E-05 |
| HPGD      | 4q34.1              | 0.221868 | 1.20E-05 | 8.04E-05 |
| LINC01018 | 5p15.31             | -0.22185 | 1.21E-05 | 8.05E-05 |
| BIRC3     | 11q22.2             | 0.22178  | 1.21E-05 | 8.10E-05 |
| BAP1      | 3p21.1              | -0.22175 | 1.22E-05 | 8.12E-05 |
| PARM1     | 4q13.3              | 0.221697 | 1.22E-05 | 8.16E-05 |
| C2ORF27A  | 2q21.2              | -0.22163 | 1.23E-05 | 8.21E-05 |
| BTN3A2    | 6p22.2              | 0.221611 | 1.23E-05 | 8.22E-05 |
| JAKMIP3   | 10q26.3             | 0.221608 | 1.23E-05 | 8.22E-05 |
| TMSB15B   | Xq22.2              | -0.22161 | 1.23E-05 | 8.22E-05 |
| SCARNA12  | 12p13.31            | -0.22153 | 1.24E-05 | 8.27E-05 |
| ZNF681    | 19p12               | -0.22153 | 1.24E-05 | 8.27E-05 |
| TIGD1     | 2q37.1              | -0.22152 | 1.24E-05 | 8.27E-05 |
| ZNF345    | 19q13.12            | -0.2215  | 1.25E-05 | 8.29E-05 |
| STIP1     | 11q13.1             | -0.22149 | 1.25E-05 | 8.29E-05 |
| SLC36A4   | 11q21               | 0.221441 | 1.25E-05 | 8.33E-05 |

|           |          |          |          |          |
|-----------|----------|----------|----------|----------|
| MAML3     | 4q31.1   | 0.221439 | 1.25E-05 | 8.33E-05 |
| SBNO2     | 19p13.3  | 0.221433 | 1.25E-05 | 8.33E-05 |
| ATP2C2    | 16q24.1  | 0.221431 | 1.25E-05 | 8.33E-05 |
| HMG20B    | 19p13.3  | 0.221416 | 1.26E-05 | 8.34E-05 |
| PVR       | 19q13.31 | -0.2214  | 1.26E-05 | 8.35E-05 |
| ABCD4     | 14q24.3  | 0.221344 | 1.26E-05 | 8.39E-05 |
| TMTC4     | 13q32.3  | -0.22132 | 1.27E-05 | 8.40E-05 |
| BGLAP     | 1q22     | -0.22132 | 1.27E-05 | 8.40E-05 |
| CTU1      | 19q13.41 | -0.22131 | 1.27E-05 | 8.41E-05 |
| RCE1      | 11q13.2  | -0.22129 | 1.27E-05 | 8.42E-05 |
| THAP8     | 19q13.12 | -0.22123 | 1.28E-05 | 8.46E-05 |
| AKAP3     | 12p13.32 | 0.221215 | 1.28E-05 | 8.47E-05 |
| EIF2B1    | 12q24.31 | -0.22121 | 1.28E-05 | 8.47E-05 |
| ZNF443    | 19p13.2  | -0.22119 | 1.28E-05 | 8.48E-05 |
| MLKL      | 16q23.1  | 0.221155 | 1.29E-05 | 8.51E-05 |
| METAP1D   | 2q31.1   | -0.22115 | 1.29E-05 | 8.51E-05 |
| TMEM176B  | 7q36.1   | -0.22113 | 1.29E-05 | 8.52E-05 |
| CRCP      | 7q11.21  | -0.22112 | 1.29E-05 | 8.52E-05 |
| CD101     | 1p13.1   | 0.221061 | 1.30E-05 | 8.57E-05 |
| ZC4H2     | Xq11.2   | -0.22099 | 1.31E-05 | 8.63E-05 |
| NUTM1     | 15q14    | 0.220938 | 1.31E-05 | 8.66E-05 |
| STX1A     | 7q11.23  | -0.22091 | 1.32E-05 | 8.68E-05 |
| SV2A      | 1q21.2   | -0.2209  | 1.32E-05 | 8.69E-05 |
| SLC39A10  | 2q32.3   | -0.22086 | 1.32E-05 | 8.71E-05 |
| MYO5B     | 18q21.1  | 0.220814 | 1.33E-05 | 8.75E-05 |
| KIAA1324  | 1p13.3   | 0.220807 | 1.33E-05 | 8.75E-05 |
| CXORF40A  | Xq28     | -0.22079 | 1.33E-05 | 8.77E-05 |
| PRMT7     | 16q22.1  | -0.22078 | 1.33E-05 | 8.77E-05 |
| NANP      | 20p11.21 | -0.22077 | 1.33E-05 | 8.77E-05 |
| SCML1     | Xp22.13  | -0.22069 | 1.34E-05 | 8.84E-05 |
| DTNA      | 18q12.1  | -0.22068 | 1.34E-05 | 8.85E-05 |
| NIPSNAP2  | 7p11.2   | -0.22063 | 1.35E-05 | 8.88E-05 |
| RHEBL1    | 12q13.12 | -0.22061 | 1.35E-05 | 8.89E-05 |
| MRPL13    | 8q24.12  | -0.22055 | 1.36E-05 | 8.94E-05 |
| ZNF502    | 3p21.31  | -0.22055 | 1.36E-05 | 8.94E-05 |
| NUP93     | 16q13    | -0.22043 | 1.38E-05 | 9.04E-05 |
| SERTAD4   | 1q32.2   | 0.22034  | 1.39E-05 | 9.11E-05 |
| ITPA      | 20p13    | -0.22033 | 1.39E-05 | 9.12E-05 |
| COQ4      | 9q34.11  | 0.220323 | 1.39E-05 | 9.12E-05 |
| CMTM3     | 16q22.1  | -0.22032 | 1.39E-05 | 9.12E-05 |
| ARL14     | 3q25.33  | 0.220208 | 1.40E-05 | 9.21E-05 |
| CLPB      | 11q13.4  | -0.22008 | 1.42E-05 | 9.31E-05 |
| PLPP5     | 8p11.23  | 0.220057 | 1.42E-05 | 9.33E-05 |
| UBA7      | 3p21.31  | 0.22005  | 1.42E-05 | 9.33E-05 |
| GNA15     | 19p13.3  | 0.220022 | 1.43E-05 | 9.35E-05 |
| DNAJC19   | 3q26.33  | -0.21999 | 1.43E-05 | 9.38E-05 |
| ADNP2     | 18q23    | 0.219986 | 1.43E-05 | 9.38E-05 |
| KNL1      | 15q15.1  | 0.219971 | 1.43E-05 | 9.39E-05 |
| SEPTIN7P2 | 7p12.3   | -0.21995 | 1.44E-05 | 9.40E-05 |
| IARS2     | 1q41     | 0.219939 | 1.44E-05 | 9.41E-05 |
| BOD1      | 5q35.2   | -0.21986 | 1.45E-05 | 9.47E-05 |
| HLA-E     | 6p22.1   | 0.21981  | 1.46E-05 | 9.52E-05 |
| HDLBP     | 2q37.3   | 0.219782 | 1.46E-05 | 9.54E-05 |
| SOX13     | 1q32.1   | 0.219777 | 1.46E-05 | 9.54E-05 |
| DNAJC11   | 1p36.31  | 0.219752 | 1.46E-05 | 9.56E-05 |
| ZBTB39    | 12q13.3  | -0.2197  | 1.47E-05 | 9.60E-05 |
| ATP6AP2   | Xp11.4   | -0.21969 | 1.47E-05 | 9.60E-05 |
| FNTA      | 8p11.21  | -0.21961 | 1.48E-05 | 9.68E-05 |

|             |                |          |          |             |
|-------------|----------------|----------|----------|-------------|
| SLC28A3     | 9q21.32-q21.33 | 0.219599 | 1.48E-05 | 9.68E-05    |
| PPP1R15B    | 1q32.1         | 0.219572 | 1.49E-05 | 9.70E-05    |
| CNPY4       | 7q22.1         | -0.21955 | 1.49E-05 | 9.72E-05    |
| RAPGEF4-AS1 | 2q31.1         | -0.21954 | 1.49E-05 | 9.72E-05    |
| GOLGA1      | 9q33.3         | 0.219539 | 1.49E-05 | 9.72E-05    |
| LYN         | 8q12.1         | 0.219527 | 1.49E-05 | 9.73E-05    |
| ACE         | 17q23.3        | 0.219478 | 1.50E-05 | 9.77E-05    |
| MSMB        | 10q11.22       | 0.219401 | 1.51E-05 | 9.83E-05    |
| LINC00999   | 10p11.1        | -0.21938 | 1.51E-05 | 9.85E-05    |
| RHOF        | 12q24.31       | 0.219312 | 1.52E-05 | 9.91E-05    |
| OFD1        | Xp22.2         | -0.21926 | 1.53E-05 | 9.95E-05    |
| TACC1       | 8p11.22        | 0.21924  | 1.53E-05 | 9.97E-05    |
| KANSL2      | 12q13.11       | -0.21924 | 1.53E-05 | 9.97E-05    |
| HSP90AB1    | 6p21.1         | -0.21922 | 1.54E-05 | 9.98E-05    |
| ABCC1       | 16p13.11       | -0.21919 | 1.54E-05 | 0.000100084 |
| ST20        | 15q25.1        | -0.21914 | 1.55E-05 | 0.000100445 |
| PRR3        | 6p21.33        | -0.21914 | 1.55E-05 | 0.000100462 |
| SYCE1L      | 16q23.1        | -0.21913 | 1.55E-05 | 0.000100462 |
| BDKRB1      | 14q32.2        | 0.219075 | 1.56E-05 | 0.000100973 |
| GRSF1       | 4q13.3         | 0.219066 | 1.56E-05 | 0.000101024 |
| GPALPP1     | 13q14.12       | -0.21902 | 1.57E-05 | 0.00010145  |
| RNF217      | 6q22.31        | -0.21897 | 1.57E-05 | 0.000101816 |
| ZUP1        | 6q22.1         | -0.21893 | 1.58E-05 | 0.000102228 |
| GUSBP1      | 5p14.3         | -0.21891 | 1.58E-05 | 0.000102322 |
| PTGFRN      | 1p13.1         | 0.218851 | 1.59E-05 | 0.000102861 |
| KIF3B       | 20q11.21       | -0.21884 | 1.59E-05 | 0.000102961 |
| PTAR1       | 9q21.12        | 0.218795 | 1.60E-05 | 0.00010332  |
| MINDY4      | 7p14.3         | -0.21876 | 1.60E-05 | 0.00010359  |
| CCNB1IP1    | 14q11.2        | -0.21875 | 1.61E-05 | 0.000103699 |
| CABLES2     | 20q13.33       | -0.21866 | 1.62E-05 | 0.000104523 |
| VRTN        | 14q24.3        | 0.2186   | 1.63E-05 | 0.00010505  |
| SMARCC1     | 3p21.31        | -0.21858 | 1.63E-05 | 0.000105196 |
| FAU         | 11q13.1        | -0.21857 | 1.63E-05 | 0.000105251 |
| NEDD9       | 6p24.2         | 0.218568 | 1.63E-05 | 0.000105256 |
| FAM83G      | 17p11.2        | 0.218562 | 1.63E-05 | 0.000105272 |
| GCNT4       | 5q13.3         | 0.218553 | 1.63E-05 | 0.000105328 |
| PRDM13      | 6q16.2         | -0.21846 | 1.65E-05 | 0.000106236 |
| TMEM254-AS1 | 10q22.3        | -0.21844 | 1.65E-05 | 0.000106329 |
| FAM120C     | Xp11.22        | -0.21834 | 1.67E-05 | 0.000107286 |
| EFHD1       | 2q37.1         | -0.21831 | 1.67E-05 | 0.000107572 |
| KIF11       | 10q23.33       | 0.218239 | 1.68E-05 | 0.000108216 |
| ST5         | 11p15.4        | 0.218198 | 1.69E-05 | 0.000108568 |
| WDR37       | 10p15.3        | 0.218197 | 1.69E-05 | 0.000108568 |
| RSPH10B2    | 7p22.1         | -0.21818 | 1.69E-05 | 0.00010866  |
| GATD1       | 11p15.5        | -0.21818 | 1.69E-05 | 0.00010866  |
| AGTR1       | 3q24           | -0.21814 | 1.70E-05 | 0.000109055 |
| TMEM199     | 17q11.2        | -0.21809 | 1.71E-05 | 0.00010952  |
| MTCP1       | Xq28           | -0.21807 | 1.71E-05 | 0.000109605 |
| RNFT1       | 17q23.1        | -0.21803 | 1.71E-05 | 0.000110036 |
| JMJD4       | 1q42.13        | -0.21798 | 1.72E-05 | 0.000110448 |
| GRIN1       | 9q34.3         | 0.217929 | 1.73E-05 | 0.000110966 |
| CCNT2       | 2q21.3         | -0.2179  | 1.73E-05 | 0.000111227 |
| ODAM        | 4q13.3         | -0.21789 | 1.74E-05 | 0.000111317 |
| FH          | 1q43           | 0.217873 | 1.74E-05 | 0.000111422 |
| TSC22D1     | 13q14.11       | -0.21783 | 1.74E-05 | 0.00011178  |
| SPANXB1     | Xq27.1         | -0.2178  | 1.75E-05 | 0.000112062 |
| GBA         | 1q22           | 0.217775 | 1.75E-05 | 0.000112317 |
| C7ORF13     | 7q36.3         | -0.21774 | 1.76E-05 | 0.000112599 |

|            |                 |          |          |             |
|------------|-----------------|----------|----------|-------------|
| OR4C6      | 11q11           | -0.21772 | 1.76E-05 | 0.000112798 |
| MBD2       | 18q21.2         | 0.21768  | 1.77E-05 | 0.000113181 |
| RDH14      | 2p24.2          | -0.21763 | 1.78E-05 | 0.000113635 |
| MTUS2      | 13q12.3         | 0.217629 | 1.78E-05 | 0.000113635 |
| PRODH      | 22q11.21        | 0.217608 | 1.78E-05 | 0.000113806 |
| RPUSD4     | 11q24.2         | -0.21761 | 1.78E-05 | 0.000113806 |
| PIK3CB     | 3q22.3          | 0.217455 | 1.81E-05 | 0.000115312 |
| CBWD2      | 2q14.1          | -0.21745 | 1.81E-05 | 0.000115312 |
| MSRA       | 8p23.1          | 0.217433 | 1.81E-05 | 0.000115501 |
| MIER1      | 1p31.3          | 0.217372 | 1.82E-05 | 0.000116108 |
| C2CD4B     | 15q22.2         | 0.217357 | 1.82E-05 | 0.000116219 |
| TAF10      | 11p15.4         | -0.21735 | 1.82E-05 | 0.000116243 |
| LRRTM1     | 2p12            | -0.21732 | 1.83E-05 | 0.000116507 |
| ZNF672     | 1q44            | 0.217275 | 1.84E-05 | 0.000116978 |
| PDCD2L     | 19q13.11        | -0.21725 | 1.84E-05 | 0.000117259 |
| C3ORF52    | 3q13.2          | 0.217218 | 1.85E-05 | 0.000117516 |
| TFG        | 3q12.2          | 0.217153 | 1.86E-05 | 0.000118167 |
| SRCIN1     | 17q12           | -0.21706 | 1.87E-05 | 0.000119136 |
| NPHS2      | 1q25.2          | 0.217031 | 1.88E-05 | 0.000119416 |
| TUB        | 11p15.4         | -0.21702 | 1.88E-05 | 0.00011947  |
| MAPKAPK3   | 3p21.2          | -0.21698 | 1.88E-05 | 0.000119844 |
| KTN1-AS1   | 14q22.3         | -0.21694 | 1.89E-05 | 0.000120235 |
| TAT        | 16q22.2         | 0.216918 | 1.90E-05 | 0.000120485 |
| KRT7       | 12q13.13        | 0.216913 | 1.90E-05 | 0.000120504 |
| ZSWIM4     | 19p13.13-p13.12 | -0.21683 | 1.91E-05 | 0.000121384 |
| LSM7       | 19p13.3         | -0.21679 | 1.92E-05 | 0.000121779 |
| IMPDH1     | 7q32.1          | -0.21677 | 1.92E-05 | 0.000121959 |
| CHCHD2     | 7p11.2          | -0.21676 | 1.92E-05 | 0.000122056 |
| NOTCH1     | 9q34.3          | -0.21668 | 1.94E-05 | 0.000122891 |
| ZNF449     | Xq26.3          | -0.21668 | 1.94E-05 | 0.000122891 |
| SLC22A3    | 6q25.3          | -0.21662 | 1.95E-05 | 0.000123482 |
| KAT6B      | 10q22.2         | 0.216604 | 1.95E-05 | 0.000123613 |
| TNRC6B     | 22q13.1         | 0.216601 | 1.95E-05 | 0.000123613 |
| SNAI3      | 16q24.2         | 0.216594 | 1.95E-05 | 0.000123654 |
| FTSJ1      | Xp11.23         | -0.21646 | 1.98E-05 | 0.000125107 |
| ZNF24      | 18q12.2         | 0.216364 | 1.99E-05 | 0.000126174 |
| COPA       | 1q23.2          | 0.21629  | 2.01E-05 | 0.000126974 |
| FLNA       | Xq28            | -0.21625 | 2.01E-05 | 0.00012734  |
| TADA3      | 3p25.3          | -0.21624 | 2.02E-05 | 0.000127526 |
| REM2       | 14q11.2         | -0.21623 | 2.02E-05 | 0.000127567 |
| RILPL1     | 12q24.31        | -0.21621 | 2.02E-05 | 0.000127673 |
| MCMDC2     | 8q13.1          | -0.21621 | 2.02E-05 | 0.000127673 |
| ACAP2      | 3q29            | 0.216155 | 2.03E-05 | 0.00012829  |
| KLHL42     | 12p11.22        | -0.21612 | 2.04E-05 | 0.000128669 |
| ERLIN1     | 10q24.31        | 0.216093 | 2.04E-05 | 0.000128937 |
| OST4       | 2p23.3          | -0.21605 | 2.05E-05 | 0.000129444 |
| RECQL5     | 17q25.1         | -0.21603 | 2.05E-05 | 0.000129549 |
| SDR42E1    | 16q23.3         | -0.21601 | 2.06E-05 | 0.000129735 |
| YAF2       | 12q12           | -0.21598 | 2.06E-05 | 0.000130081 |
| CDC123     | 10p14-p13       | -0.21594 | 2.07E-05 | 0.000130447 |
| CDKN2AIPNL | 5q31.1          | -0.21594 | 2.07E-05 | 0.000130447 |
| TSPAN18    | 11p11.2         | -0.21593 | 2.07E-05 | 0.000130609 |
| ACOT9      | Xp22.11         | -0.21582 | 2.09E-05 | 0.000131763 |
| KCNJ3      | 2q24.1          | 0.21582  | 2.09E-05 | 0.000131781 |
| SFXN1      | 5q35.2          | 0.215758 | 2.11E-05 | 0.000132478 |
| DNAJA3     | 16p13.3         | -0.21574 | 2.11E-05 | 0.000132606 |
| HILS1      | 17q21.33        | -0.21573 | 2.11E-05 | 0.000132719 |
| NIF3L1     | 2q33.1          | -0.21573 | 2.11E-05 | 0.000132719 |

|             |          |          |          |             |
|-------------|----------|----------|----------|-------------|
| PPA2        | 4q24     | 0.215688 | 2.12E-05 | 0.000133144 |
| COMP        | 19p13.11 | -0.21568 | 2.12E-05 | 0.000133191 |
| ATP2C1      | 3q22.1   | 0.215648 | 2.13E-05 | 0.00013354  |
| KIF26B      | 1q44     | -0.21564 | 2.13E-05 | 0.000133648 |
| SEPTIN5     | 22q11.21 | -0.21557 | 2.14E-05 | 0.000134446 |
| ABCA7       | 19p13.3  | 0.215559 | 2.14E-05 | 0.000134449 |
| ANO8        | 19p13.11 | 0.215506 | 2.15E-05 | 0.000135097 |
| SCD         | 10q24.31 | -0.21549 | 2.16E-05 | 0.00013524  |
| GSE1        | 16q24.1  | -0.21546 | 2.16E-05 | 0.000135521 |
| USP14       | 18p11.32 | 0.215436 | 2.17E-05 | 0.000135821 |
| KRTAP3-1    | 17q21.2  | -0.21543 | 2.17E-05 | 0.000135889 |
| ZNF282      | 7q36.1   | -0.2154  | 2.17E-05 | 0.000136141 |
| GRB7        | 17q12    | -0.21531 | 2.19E-05 | 0.000137198 |
| FAM222A-AS1 | 12q24.11 | -0.21529 | 2.20E-05 | 0.000137399 |
| CCDC89      | 11q14.1  | -0.21528 | 2.20E-05 | 0.000137493 |
| EXT2        | 11p11.2  | -0.21528 | 2.20E-05 | 0.000137493 |
| KIR2DL4     | 19q13.42 | 0.215259 | 2.20E-05 | 0.000137706 |
| FAM229B     | 6q21     | -0.21524 | 2.21E-05 | 0.000137844 |
| SPIRE1      | 18p11.21 | 0.215227 | 2.21E-05 | 0.000137977 |
| IER3IP1     | 18q21.1  | 0.215226 | 2.21E-05 | 0.000137977 |
| NPAS1       | 19q13.32 | 0.215159 | 2.22E-05 | 0.000138767 |
| CCDC34      | 11p14.1  | -0.21512 | 2.23E-05 | 0.000139192 |
| REEP3       | 10q21.3  | 0.215105 | 2.23E-05 | 0.000139365 |
| G6PC2       | 2q31.1   | 0.215091 | 2.24E-05 | 0.000139495 |
| NUTM2A-AS1  | 10q23.2  | -0.21508 | 2.24E-05 | 0.000139618 |
| EXOSC8      | 13q13.3  | -0.21505 | 2.24E-05 | 0.000139899 |
| SYTL5       | Xp11.4   | 0.215031 | 2.25E-05 | 0.00014011  |
| SPIB        | 19q13.33 | 0.215011 | 2.25E-05 | 0.000140324 |
| LINC02433   | 4q32.1   | -0.21499 | 2.26E-05 | 0.000140484 |
| MPP6        | 7p15.3   | -0.21499 | 2.26E-05 | 0.000140528 |
| USE1        | 19p13.11 | -0.21496 | 2.26E-05 | 0.000140794 |
| ARHGAP12    | 10p11.22 | 0.214951 | 2.26E-05 | 0.000140914 |
| ZNF287      | 17p11.2  | -0.21493 | 2.27E-05 | 0.000141086 |
| ADGRF2      | 6p12.3   | -0.21492 | 2.27E-05 | 0.000141275 |
| NFATC2IP    | 16p11.2  | 0.214881 | 2.28E-05 | 0.000141671 |
| NACAD       | 7p13     | -0.21486 | 2.28E-05 | 0.000141921 |
| C1QTNF3     | 5p13.2   | -0.21484 | 2.29E-05 | 0.000142072 |
| C12ORF49    | 12q24.22 | 0.214833 | 2.29E-05 | 0.000142148 |
| TNFRSF25    | 1p36.31  | -0.21473 | 2.31E-05 | 0.000143451 |
| TFDP2       | 3q23     | -0.21471 | 2.31E-05 | 0.0001436   |
| MED4        | 13q14.2  | -0.21471 | 2.31E-05 | 0.000143606 |
| SAC3D1      | 11q13.1  | -0.21466 | 2.32E-05 | 0.000144153 |
| ADRA2C      | 4p16.3   | -0.21464 | 2.33E-05 | 0.000144362 |
| CASZ1       | 1p36.22  | 0.214635 | 2.33E-05 | 0.000144421 |
| SSTR5       | 16p13.3  | 0.214587 | 2.34E-05 | 0.000144991 |
| DNAAF5      | 7p22.3   | -0.21458 | 2.34E-05 | 0.000144991 |
| RHOB        | 2p24.1   | -0.21458 | 2.34E-05 | 0.000145051 |
| CCDC121     | 2p23.3   | -0.21457 | 2.34E-05 | 0.000145051 |
| UBE2D4      | 7p13     | -0.21455 | 2.35E-05 | 0.000145294 |
| DCUN1D2     | 13q34    | -0.21453 | 2.35E-05 | 0.000145527 |
| LSM14A      | 19q13.11 | -0.21453 | 2.35E-05 | 0.000145527 |
| TMEM106C    | 12q13.11 | 0.214511 | 2.36E-05 | 0.000145687 |
| ZMYM5       | 13q12.11 | -0.21449 | 2.36E-05 | 0.000145971 |
| NAA20       | 20p11.23 | -0.21445 | 2.37E-05 | 0.000146335 |
| HADH        | 4q25     | 0.214431 | 2.37E-05 | 0.000146593 |
| LMO4        | 1p22.3   | 0.214412 | 2.38E-05 | 0.000146799 |
| FBXO8       | 4q34.1   | 0.214393 | 2.38E-05 | 0.000147009 |
| STARD4      | 5q22.1   | 0.214381 | 2.38E-05 | 0.000147114 |

|          |          |          |          |             |
|----------|----------|----------|----------|-------------|
| TAF1D    | 11q21    | -0.21437 | 2.39E-05 | 0.000147234 |
| TMEM260  | 14q22.3  | -0.21436 | 2.39E-05 | 0.000147234 |
| GABPB1   | 15q21.2  | -0.21436 | 2.39E-05 | 0.000147234 |
| GCNA     | Xq13.1   | -0.21433 | 2.39E-05 | 0.000147615 |
| NKAPP1   | Xq24     | -0.21431 | 2.40E-05 | 0.00014783  |
| ORC4     | 2q23.1   | -0.21429 | 2.40E-05 | 0.000148009 |
| CEBPZ    | 2p22.2   | -0.21426 | 2.41E-05 | 0.00014842  |
| CRTAP    | 3p22.3   | -0.21422 | 2.42E-05 | 0.000148815 |
| COX15    | 10q24.2  | 0.21422  | 2.42E-05 | 0.000148815 |
| SUZ12P1  | 17q11.2  | -0.21422 | 2.42E-05 | 0.000148815 |
| MYC      | 8q24.21  | -0.21419 | 2.42E-05 | 0.000149138 |
| METR1    | 16p13.3  | 0.214169 | 2.43E-05 | 0.00014938  |
| TPST2    | 22q12.1  | -0.21407 | 2.45E-05 | 0.000150658 |
| E2F1     | 20q11.22 | -0.21402 | 2.46E-05 | 0.000151351 |
| KRT36    | 17q21.2  | -0.21396 | 2.47E-05 | 0.00015202  |
| CHMP2B   | 3p11.2   | 0.213949 | 2.48E-05 | 0.000152169 |
| CD247    | 1q24.2   | 0.213865 | 2.50E-05 | 0.000153263 |
| FBRSL1   | 12q24.33 | -0.21386 | 2.50E-05 | 0.00015332  |
| TRAM1L1  | 4q26     | -0.21383 | 2.50E-05 | 0.00015359  |
| ACKR3    | 2q37.3   | -0.21381 | 2.51E-05 | 0.000153882 |
| SOSTDC1  | 7p21.2   | -0.21378 | 2.52E-05 | 0.000154303 |
| SLC2A2   | 3q26.2   | 0.213746 | 2.52E-05 | 0.000154671 |
| ENAH     | 1q42.12  | -0.21369 | 2.54E-05 | 0.000155445 |
| METTL4   | 18p11.32 | 0.213674 | 2.54E-05 | 0.000155567 |
| NABP2    | 12q13.3  | -0.21367 | 2.54E-05 | 0.000155607 |
| SNRPB    | 20p13    | -0.21366 | 2.54E-05 | 0.000155649 |
| KCND3    | 1p13.2   | 0.213658 | 2.54E-05 | 0.000155649 |
| EXOSC1   | 10q24.1  | -0.21364 | 2.55E-05 | 0.000155802 |
| TOX2     | 20q13.12 | 0.213442 | 2.59E-05 | 0.000158588 |
| NECTIN4  | 1q23.3   | 0.213433 | 2.59E-05 | 0.000158667 |
| WNT5B    | 12p13.33 | -0.2134  | 2.60E-05 | 0.000159144 |
| GOLGA2   | 9q34.11  | 0.213386 | 2.61E-05 | 0.000159239 |
| GOLGA6L1 | 15q11.2  | -0.21338 | 2.61E-05 | 0.000159325 |
| DUSP18   | 22q12.2  | -0.21337 | 2.61E-05 | 0.000159325 |
| SMARCD1  | 12q13.12 | -0.21334 | 2.62E-05 | 0.00015969  |
| TRIP6    | 7q22.1   | -0.21334 | 2.62E-05 | 0.000159743 |
| LANCL3   | Xp21.1   | 0.213326 | 2.62E-05 | 0.000159793 |
| CAPZB    | 1p36.13  | 0.213326 | 2.62E-05 | 0.000159793 |
| TIFA     | 4q25     | 0.213302 | 2.63E-05 | 0.000160085 |
| PHGDH    | 1p12     | -0.21329 | 2.63E-05 | 0.000160168 |
| FFAR2    | 19q13.12 | 0.213256 | 2.64E-05 | 0.000160648 |
| MST1R    | 3p21.31  | 0.213248 | 2.64E-05 | 0.000160711 |
| POLR1A   | 2p11.2   | -0.21324 | 2.64E-05 | 0.000160804 |
| SLC6A2   | 16q12.2  | -0.21322 | 2.65E-05 | 0.000161063 |
| SLC39A4  | 8q24.3   | -0.21318 | 2.65E-05 | 0.00016147  |
| ZNF629   | 16p11.2  | -0.21318 | 2.65E-05 | 0.00016147  |
| SS18     | 18q11.2  | 0.213132 | 2.67E-05 | 0.000162138 |
| CTSZ     | 20q13.32 | -0.21302 | 2.69E-05 | 0.000163738 |
| RNF138P1 | 5q11.2   | 0.213012 | 2.69E-05 | 0.000163781 |
| DNAJC16  | 1p36.21  | 0.212954 | 2.71E-05 | 0.000164586 |
| HNF4G    | 8q21.13  | 0.212913 | 2.72E-05 | 0.000165127 |
| RGS19    | 20q13.33 | -0.21291 | 2.72E-05 | 0.00016513  |
| ZNF532   | 18q21.32 | -0.2129  | 2.72E-05 | 0.00016523  |
| JPX      | Xq13.2   | -0.2129  | 2.72E-05 | 0.00016523  |
| NEO1     | 15q24.1  | 0.212865 | 2.73E-05 | 0.000165636 |
| CDKAL1   | 6p22.3   | -0.21286 | 2.73E-05 | 0.000165659 |
| UTP4     | 16q22.1  | -0.21279 | 2.75E-05 | 0.000166611 |
| PPP4R3B  | 2p16.1   | -0.21277 | 2.75E-05 | 0.000166947 |

|            |          |          |          |             |
|------------|----------|----------|----------|-------------|
| CLDN11     | 3q26.2   | -0.2127  | 2.77E-05 | 0.000167899 |
| FCRLB      | 1q23.3   | -0.21264 | 2.78E-05 | 0.000168736 |
| HSPB8      | 12q24.23 | -0.2126  | 2.79E-05 | 0.000169272 |
| APOH       | 17q24.2  | -0.21259 | 2.80E-05 | 0.000169376 |
| TRPM4      | 19q13.33 | 0.212583 | 2.80E-05 | 0.000169376 |
| P3H4       | 17q21.2  | -0.21258 | 2.80E-05 | 0.000169376 |
| FAM41C     | 1p36.33  | -0.21258 | 2.80E-05 | 0.000169376 |
| H2AFY2     | 10q22.1  | -0.21254 | 2.81E-05 | 0.000169925 |
| TMEM243    | 7q21.12  | -0.21254 | 2.81E-05 | 0.000169925 |
| CLDN6      | 16p13.3  | -0.21252 | 2.81E-05 | 0.000170098 |
| ZG16B      | 16p13.3  | 0.212507 | 2.82E-05 | 0.000170281 |
| PFDN2      | 1q23.3   | -0.21249 | 2.82E-05 | 0.000170513 |
| PAXIP1-AS1 | 7q36.2   | -0.21247 | 2.83E-05 | 0.0001708   |
| POLH       | 6p21.1   | 0.212413 | 2.84E-05 | 0.000171525 |
| DIS3L2     | 2q37.1   | -0.21241 | 2.84E-05 | 0.000171525 |
| AKNA       | 9q32     | 0.212268 | 2.88E-05 | 0.00017367  |
| PCSK6      | 15q26.3  | 0.21226  | 2.88E-05 | 0.000173731 |
| SLC16A3    | 17q25.3  | 0.212255 | 2.88E-05 | 0.000173751 |
| SPERT      | 13q14.13 | -0.2122  | 2.89E-05 | 0.000174492 |
| CNOT11     | 2q11.2   | -0.21217 | 2.90E-05 | 0.000174928 |
| SPDYA      | 2p23.2   | -0.21216 | 2.91E-05 | 0.000175073 |
| TRMT10B    | 9p13.2   | -0.21215 | 2.91E-05 | 0.000175118 |
| ECI2       | 6p25.2   | 0.21215  | 2.91E-05 | 0.000175118 |
| TBCEL      | 11q23.3  | -0.21214 | 2.91E-05 | 0.000175246 |
| POU4F1     | 13q31.1  | -0.21212 | 2.92E-05 | 0.00017546  |
| FAM53B     | 10q26.13 | 0.212071 | 2.93E-05 | 0.000176187 |
| GK         | Xp21.2   | 0.211984 | 2.95E-05 | 0.000177504 |
| METTL1     | 12q14.1  | -0.21197 | 2.96E-05 | 0.000177721 |
| PRDM10     | 11q24.3  | 0.211913 | 2.97E-05 | 0.000178517 |
| SCNN1A     | 12p13.31 | 0.211855 | 2.99E-05 | 0.000179382 |
| FGF20      | 8p22     | -0.2118  | 3.00E-05 | 0.000180229 |
| TRAIP      | 3p21.31  | -0.21178 | 3.00E-05 | 0.000180419 |
| FXVD6      | 11q23.3  | -0.21174 | 3.02E-05 | 0.000181078 |
| RFXANK     | 19p13.11 | -0.21165 | 3.04E-05 | 0.000182523 |
| LPO        | 17q22    | -0.21163 | 3.04E-05 | 0.000182647 |
| RCL1       | 9p24.1   | -0.21163 | 3.05E-05 | 0.000182703 |
| GABRA3     | Xq28     | -0.21158 | 3.06E-05 | 0.000183489 |
| FCHSD1     | 5q31.3   | -0.21155 | 3.07E-05 | 0.000183775 |
| KCTD16     | 5q31.3   | -0.21155 | 3.07E-05 | 0.000183775 |
| PIGT       | 20q13.12 | -0.21154 | 3.07E-05 | 0.000183876 |
| GJC1       | 17q21.31 | -0.21153 | 3.07E-05 | 0.00018409  |
| LRRC8B     | 1p22.2   | 0.21147  | 3.09E-05 | 0.000184911 |
| CHORDC1    | 11q14.3  | -0.21147 | 3.09E-05 | 0.000184911 |
| USP35      | 11q14.1  | -0.21132 | 3.13E-05 | 0.000187241 |
| PGBD5      | 1q42.13  | -0.21129 | 3.14E-05 | 0.000187798 |
| ZNF75A     | 16p13.3  | -0.21126 | 3.15E-05 | 0.000188132 |
| SMUG1      | 12q13.13 | -0.21124 | 3.15E-05 | 0.000188466 |
| PHYKPL     | 5q35.3   | 0.211127 | 3.18E-05 | 0.000190274 |
| TPTE2P3    | 13q14.3  | -0.2111  | 3.19E-05 | 0.000190692 |
| HADHB      | 2p23.3   | 0.211096 | 3.19E-05 | 0.000190696 |
| HSPD1      | 2q33.1   | -0.21108 | 3.20E-05 | 0.000190943 |
| TAGLN      | 11q23.3  | -0.21096 | 3.23E-05 | 0.000192909 |
| GNL3       | 3p21.1   | -0.21088 | 3.25E-05 | 0.000194212 |
| CREBZF     | 11q14.1  | -0.21087 | 3.26E-05 | 0.000194212 |
| AMIGO2     | 12q13.11 | -0.21084 | 3.27E-05 | 0.000194796 |
| SNRPD2     | 19q13.32 | -0.21082 | 3.27E-05 | 0.000195067 |
| NABP1      | 2q32.3   | -0.21081 | 3.28E-05 | 0.00019522  |
| CMC4       | Xq28     | -0.21079 | 3.28E-05 | 0.000195366 |

|           |                            |          |          |             |
|-----------|----------------------------|----------|----------|-------------|
| REXO4     | 9q34.2                     | -0.21076 | 3.29E-05 | 0.000195972 |
| TBC1D4    | 13q22.2                    | -0.21073 | 3.30E-05 | 0.000196276 |
| DVL3      | 3q27.1                     | -0.21073 | 3.30E-05 | 0.000196276 |
| SLC12A9   | 7q22.1                     | -0.21072 | 3.30E-05 | 0.000196407 |
| TUSC2     | 3p21.31                    | -0.21067 | 3.32E-05 | 0.000197274 |
| NGDN      | 14q11.2                    | -0.21064 | 3.32E-05 | 0.000197618 |
| HHIPL1    | 14q32.2                    | -0.21064 | 3.32E-05 | 0.000197618 |
| CCZ1B     | 7p22.1                     | -0.21063 | 3.33E-05 | 0.00019778  |
| PLCXD1    | Xp22.33 and Yp11.32-p11.31 | 0.210608 | 3.33E-05 | 0.000198063 |
| SYNGR4    | 19q13.33                   | 0.210596 | 3.34E-05 | 0.000198194 |
| CIDEB     | 14q12                      | 0.210591 | 3.34E-05 | 0.000198194 |
| PPDPF     | 20q13.33                   | -0.21059 | 3.34E-05 | 0.000198194 |
| LSM10     | 1p34.3                     | -0.21055 | 3.35E-05 | 0.000198777 |
| ARMCX5    | Xq22.1                     | -0.21053 | 3.35E-05 | 0.000199059 |
| TBC1D14   | 4p16.1                     | 0.210464 | 3.38E-05 | 0.000200233 |
| FUT1      | 19q13.33                   | -0.21044 | 3.38E-05 | 0.000200505 |
| KLHL2     | 4q32.3                     | 0.210442 | 3.38E-05 | 0.000200505 |
| DACT3     | 19q13.32                   | -0.21044 | 3.38E-05 | 0.000200522 |
| LINC00469 | 17q25.1                    | 0.210428 | 3.39E-05 | 0.000200631 |
| FRK       | 6q22.1                     | 0.210425 | 3.39E-05 | 0.000200631 |
| AAMDC     | 11q14.1                    | -0.21041 | 3.39E-05 | 0.000200746 |
| STK33     | 11p15.4                    | -0.21041 | 3.39E-05 | 0.00020075  |
| SCHIP1    | 3q25.32-q25.33             | -0.2104  | 3.39E-05 | 0.00020086  |
| MMP24     | 20q11.22                   | -0.21037 | 3.40E-05 | 0.000201276 |
| ZNF471    | 19q13.43                   | -0.21032 | 3.42E-05 | 0.000202175 |
| SMARCD2   | 17q23.3                    | -0.21031 | 3.42E-05 | 0.000202284 |
| MAGEH1    | Xp11.21                    | -0.21031 | 3.42E-05 | 0.000202297 |
| ALPP      | 2q37.1                     | 0.210263 | 3.44E-05 | 0.000203023 |
| TRIM71    | 3p22.3                     | -0.21018 | 3.46E-05 | 0.000204437 |
| EDA       | Xq13.1                     | -0.21016 | 3.47E-05 | 0.000204795 |
| CHID1     | 11p15.5                    | -0.21015 | 3.47E-05 | 0.000204795 |
| FBXL6     | 8q24.3                     | -0.21012 | 3.48E-05 | 0.000205252 |
| RNF144B   | 6p22.3                     | 0.210122 | 3.48E-05 | 0.000205252 |
| LOC153684 | 5p12                       | 0.210023 | 3.51E-05 | 0.000206942 |
| POGLUT1   | 3q13.33                    | -0.21002 | 3.51E-05 | 0.000206942 |
| NKAPD1    | 11q23.1                    | -0.21001 | 3.51E-05 | 0.000207116 |
| SETD6     | 16q21                      | -0.20999 | 3.52E-05 | 0.000207439 |
| NHLRC2    | 10q25.3                    | 0.209979 | 3.52E-05 | 0.000207535 |
| ATF4      | 22q13.1                    | -0.20994 | 3.53E-05 | 0.0002082   |
| CDX2      | 13q12.2                    | -0.20988 | 3.55E-05 | 0.000209263 |
| RERG      | 12p12.3                    | -0.20986 | 3.56E-05 | 0.000209494 |
| SOD1      | 21q22.11                   | 0.209853 | 3.56E-05 | 0.00020961  |
| PSMD13    | 11p15.5                    | -0.20982 | 3.57E-05 | 0.000210167 |
| DIP2A     | 21q22.3                    | 0.209812 | 3.57E-05 | 0.000210232 |
| CST1      | 20p11.21                   | -0.20979 | 3.58E-05 | 0.000210536 |
| KRT10     | 17q21.2                    | -0.20975 | 3.59E-05 | 0.000211266 |
| MT1E      | 16q13                      | 0.209727 | 3.60E-05 | 0.000211593 |
| C4ORF33   | 4q28.2                     | 0.209725 | 3.60E-05 | 0.000211593 |
| SH2D5     | 1p36.12                    | -0.20972 | 3.60E-05 | 0.00021169  |
| CTAGE10P  | 13q14.2                    | 0.209713 | 3.61E-05 | 0.00021169  |
| PRKCQ     | 10p15.1                    | -0.2097  | 3.61E-05 | 0.000211923 |
| RPL21     | 13q12.2                    | -0.20968 | 3.61E-05 | 0.000212079 |
| KRT74     | 12q13.13                   | -0.20968 | 3.62E-05 | 0.000212079 |
| GALNT18   | 11p15.4                    | -0.20968 | 3.62E-05 | 0.000212088 |
| ESRRG     | 1q41                       | -0.20966 | 3.62E-05 | 0.00021228  |
| UCA1      | 19p13.12                   | -0.20964 | 3.63E-05 | 0.000212649 |
| RBM15B    | 3p21.2                     | -0.20964 | 3.63E-05 | 0.000212671 |
| SLC22A12  | 11q13.1                    | -0.20963 | 3.63E-05 | 0.000212801 |



|            |                 |          |          |             |
|------------|-----------------|----------|----------|-------------|
| SPON1      | 11p15.2         | 0.2096   | 3.64E-05 | 0.000213246 |
| SLC17A8    | 12q23.1         | 0.209596 | 3.64E-05 | 0.000213251 |
| LINC00339  | 1p36.12         | -0.20957 | 3.65E-05 | 0.000213765 |
| TMPRSS4    | 11q23.3         | 0.20952  | 3.67E-05 | 0.000214547 |
| ZNF285     | 19q13.31        | -0.20951 | 3.67E-05 | 0.000214601 |
| UGT1A8     | 2q37.1          | 0.20945  | 3.69E-05 | 0.000215725 |
| EML1       | 14q32.2         | -0.20945 | 3.69E-05 | 0.000215725 |
| FBN3       | 19p13.2         | -0.20943 | 3.69E-05 | 0.000215907 |
| DAG1       | 3p21.31         | 0.209423 | 3.70E-05 | 0.000216059 |
| ZNF134     | 19q13.43        | -0.20931 | 3.73E-05 | 0.000218082 |
| MOGS       | 2p13.1          | -0.20931 | 3.74E-05 | 0.000218121 |
| NTNG2      | 9q34.13         | -0.2093  | 3.74E-05 | 0.000218121 |
| THAP11     | 16q22.1         | -0.2093  | 3.74E-05 | 0.000218121 |
| GRIN2C     | 17q25.1         | -0.20929 | 3.74E-05 | 0.000218228 |
| STARD7-AS1 | 2q11.2          | -0.20929 | 3.74E-05 | 0.000218228 |
| CYP17A1    | 10q24.32        | -0.20925 | 3.76E-05 | 0.000218978 |
| NPTN       | 15q24.1         | 0.209228 | 3.76E-05 | 0.000219275 |
| JUN        | 1p32.1          | -0.20916 | 3.78E-05 | 0.000220509 |
| RPS25      | 11q23.3         | -0.20916 | 3.79E-05 | 0.000220509 |
| TRMT12     | 8q24.13         | -0.20915 | 3.79E-05 | 0.00022052  |
| EPOP       | 17q12           | -0.20915 | 3.79E-05 | 0.000220559 |
| NXPH1      | 7p21.3          | -0.20914 | 3.79E-05 | 0.000220691 |
| HOXA4      | 7p15.2          | -0.20911 | 3.80E-05 | 0.000221146 |
| SMIM15     | 5q12.1          | 0.209093 | 3.81E-05 | 0.000221427 |
| CCNG1      | 5q34            | 0.208976 | 3.85E-05 | 0.000223596 |
| F11R       | 1q23.3          | 0.208975 | 3.85E-05 | 0.000223596 |
| TCP10      | 6q27            | -0.20886 | 3.89E-05 | 0.000225878 |
| AMZ2       | 17q24.2         | -0.20885 | 3.89E-05 | 0.000225913 |
| MYL12B     | 18p11.31        | 0.208843 | 3.89E-05 | 0.000225979 |
| EVA1B      | 1p34.3          | -0.20884 | 3.89E-05 | 0.000226028 |
| WNT3       | 17q21.31-q21.32 | -0.20883 | 3.90E-05 | 0.000226175 |
| SUGT1      | 13q14.3         | -0.20882 | 3.90E-05 | 0.000226203 |
| ITGB1BP1   | 2p25.1          | -0.20876 | 3.92E-05 | 0.00022745  |
| USP38      | 4q31.21         | 0.208749 | 3.92E-05 | 0.000227514 |
| ARF4       | 3p14.3          | 0.208695 | 3.94E-05 | 0.000228517 |
| SERP2      | 13q14.11        | -0.20868 | 3.95E-05 | 0.000228684 |
| WDR17      | 4q34.2          | -0.20866 | 3.95E-05 | 0.000229172 |
| SNHG1      | 11q12.3         | -0.20864 | 3.96E-05 | 0.000229449 |
| GSPT2      | Xp11.22         | -0.20863 | 3.96E-05 | 0.000229585 |
| MFF        | 2q36.3          | -0.20859 | 3.98E-05 | 0.00023033  |
| PALM       | 19p13.3         | -0.20855 | 3.99E-05 | 0.00023113  |
| TRPC1      | 3q23            | -0.20847 | 4.02E-05 | 0.000232538 |
| CEP76      | 18p11.21        | 0.208451 | 4.03E-05 | 0.000232894 |
| PEX26      | 22q11.21        | 0.208447 | 4.03E-05 | 0.000232923 |
| MAN1A2     | 1p12            | 0.208377 | 4.05E-05 | 0.000234266 |
| PWWP2B     | 10q26.3         | 0.208353 | 4.06E-05 | 0.000234696 |
| ZBTB9      | 6p21.32         | -0.20834 | 4.06E-05 | 0.00023487  |
| RAB8A      | 19p13.11        | 0.208324 | 4.07E-05 | 0.000235159 |
| ZKSCAN4    | 6p22.1          | -0.20829 | 4.08E-05 | 0.000235815 |
| SYCP2      | 20q13.33        | -0.20827 | 4.09E-05 | 0.000236046 |
| HNRNPDL    | 4q21.22         | -0.20824 | 4.10E-05 | 0.000236706 |
| C1ORF61    | 1q22            | -0.20821 | 4.11E-05 | 0.000237267 |
| PGM1       | 1p31.3          | 0.208204 | 4.11E-05 | 0.000237289 |
| LSM5       | 7p14.3          | -0.20818 | 4.12E-05 | 0.000237666 |
| GLUD1      | 10q23.2         | 0.208176 | 4.12E-05 | 0.000237712 |
| PJA1       | Xq13.1          | -0.20817 | 4.12E-05 | 0.000237712 |
| SEC61A1    | 3q21.3          | 0.208139 | 4.14E-05 | 0.000238352 |
| RLN1       | 9p24.1          | -0.20813 | 4.14E-05 | 0.000238381 |

|            |               |          |          |             |
|------------|---------------|----------|----------|-------------|
| POLR2I     | 19q13.12      | -0.20812 | 4.14E-05 | 0.000238572 |
| DCAF12L2   | Xq25          | -0.20808 | 4.16E-05 | 0.000239306 |
| ACSL6      | 5q31.1        | -0.20807 | 4.16E-05 | 0.000239496 |
| ABCA5      | 17q24.3       | 0.20803  | 4.18E-05 | 0.000240267 |
| NUDT8      | 11q13.2       | 0.207981 | 4.19E-05 | 0.000241244 |
| CTAGE1     | 18q11.2       | 0.207968 | 4.20E-05 | 0.000241431 |
| GP9        | 3q21.3        | 0.20796  | 4.20E-05 | 0.000241538 |
| WDR76      | 15q15.3       | 0.207925 | 4.21E-05 | 0.000242198 |
| STRAP      | 12p12.3       | -0.2079  | 4.22E-05 | 0.000242637 |
| ZNF177     | 19p13.2       | -0.20787 | 4.23E-05 | 0.000243162 |
| ANKRD52    | 12q13.3       | 0.20784  | 4.25E-05 | 0.000243785 |
| PHF7       | 3p21.1        | 0.207832 | 4.25E-05 | 0.000243893 |
| TTC32      | 2p24.1        | -0.20774 | 4.28E-05 | 0.000245625 |
| SLCO2B1    | 11q13.4       | 0.207744 | 4.28E-05 | 0.000245625 |
| SLC35D3    | 6q23.3        | -0.20773 | 4.28E-05 | 0.000245743 |
| VEGFA      | 6p21.1        | -0.20771 | 4.29E-05 | 0.00024616  |
| PLXNB1     | 3p21.31       | -0.20771 | 4.30E-05 | 0.000246232 |
| GLUD2      | Xq24          | 0.207684 | 4.30E-05 | 0.000246621 |
| TOR2A      | 9q34.11       | 0.207681 | 4.31E-05 | 0.000246621 |
| LGALS2     | 22q13.1       | 0.207676 | 4.31E-05 | 0.00024666  |
| PRICKLE2   | 3p14.1        | -0.20767 | 4.31E-05 | 0.000246673 |
| PGF        | 14q24.3       | -0.20765 | 4.32E-05 | 0.000247043 |
| CCKBR      | 11p15.4       | -0.20762 | 4.33E-05 | 0.000247656 |
| GGACT      | 13q32.3       | 0.207584 | 4.34E-05 | 0.000248353 |
| CDC34      | 19p13.3       | -0.20756 | 4.35E-05 | 0.000248741 |
| ZNF829     | 19q13.12      | -0.20756 | 4.35E-05 | 0.000248808 |
| CRYBG1     | 6q21          | 0.207535 | 4.36E-05 | 0.00024919  |
| ETV3       | 1q23.1        | 0.207492 | 4.38E-05 | 0.000250051 |
| ANXA11     | 10q22.3       | 0.207441 | 4.40E-05 | 0.000251084 |
| ABCA3      | 16p13.3       | 0.207432 | 4.40E-05 | 0.000251204 |
| RECQL      | 12p12.1       | -0.20742 | 4.40E-05 | 0.000251352 |
| ADRB1      | 10q25.3       | 0.207419 | 4.40E-05 | 0.000251352 |
| DYNC1LI1   | 3p22.3        | -0.2074  | 4.41E-05 | 0.000251797 |
| WASF2      | 1p36.11       | 0.207377 | 4.42E-05 | 0.00025212  |
| RTL8C      | Xq26.3        | -0.20737 | 4.42E-05 | 0.000252143 |
| NCBP2AS2   | 3q29          | -0.20737 | 4.42E-05 | 0.00025224  |
| PTPRD      | 9p24.1-p23    | -0.20735 | 4.43E-05 | 0.000252423 |
| SNURF      | 15q11.2       | -0.20733 | 4.44E-05 | 0.000252852 |
| LRMDA      | 10q22.2-q22.3 | -0.20727 | 4.46E-05 | 0.000254206 |
| ZNF550     | 19q13.43      | -0.20726 | 4.46E-05 | 0.000254206 |
| AP4B1      | 1p13.2        | 0.207234 | 4.48E-05 | 0.000254691 |
| CSNK1G3    | 5q23.2        | 0.207233 | 4.48E-05 | 0.000254691 |
| IRF2BP2    | 1q42.3        | -0.20723 | 4.48E-05 | 0.000254691 |
| LGMN       | 14q32.12      | 0.207208 | 4.49E-05 | 0.000255046 |
| IBA57      | 1q42.13       | 0.207208 | 4.49E-05 | 0.000255046 |
| ADAM10     | 15q21.3       | 0.20716  | 4.50E-05 | 0.000256011 |
| RAPH1      | 2q33.2        | 0.207158 | 4.50E-05 | 0.000256011 |
| TG         | 8q24.22       | -0.20712 | 4.52E-05 | 0.000256831 |
| RNF183     | 9q32          | 0.207114 | 4.52E-05 | 0.000256831 |
| RWDD3      | 1p21.3        | -0.20711 | 4.52E-05 | 0.000256854 |
| TCAP       | 17q12         | -0.20708 | 4.53E-05 | 0.000257391 |
| RBMX       | Xq26.3        | -0.20705 | 4.55E-05 | 0.00025809  |
| SCYL2      | 12q23.1       | 0.207039 | 4.55E-05 | 0.000258224 |
| PUS1       | 12q24.33      | -0.20701 | 4.56E-05 | 0.000258714 |
| SLC39A5    | 12q13.3       | -0.207   | 4.57E-05 | 0.000258998 |
| NDC80      | 18p11.32      | 0.206974 | 4.58E-05 | 0.00025946  |
| ZNF674-AS1 | Xp11.3        | -0.20694 | 4.59E-05 | 0.00026004  |
| VWDE       | 7p21.3        | -0.20693 | 4.59E-05 | 0.000260253 |

|           |              |          |          |             |
|-----------|--------------|----------|----------|-------------|
| GRIN2D    | 19q13.33     | 0.20692  | 4.60E-05 | 0.000260445 |
| IL20RA    | 6q23.3       | -0.20691 | 4.60E-05 | 0.000260511 |
| WASH3P    | 15q26.3      | -0.20691 | 4.60E-05 | 0.000260511 |
| LOC150776 | 2q21.1       | -0.20686 | 4.62E-05 | 0.000261536 |
| CLHC1     | 2p16.1       | -0.20683 | 4.63E-05 | 0.000262106 |
| GAPDHS    | 19q13.12     | -0.20682 | 4.64E-05 | 0.000262254 |
| TMEM254   | 10q22.3      | 0.206789 | 4.65E-05 | 0.000262968 |
| EIF3A     | 10q26.11     | 0.206786 | 4.65E-05 | 0.000262968 |
| ZNF350    | 19q13.41     | -0.20676 | 4.66E-05 | 0.000263457 |
| TRIT1     | 1p34.2       | -0.20672 | 4.68E-05 | 0.000264327 |
| FXR1      | 3q26.33      | -0.20672 | 4.68E-05 | 0.000264327 |
| ROR1      | 1p31.3       | 0.206708 | 4.68E-05 | 0.000264442 |
| MERTK     | 2q13         | -0.20663 | 4.72E-05 | 0.000266134 |
| MATN2     | 8q22.1-q22.2 | 0.206625 | 4.72E-05 | 0.000266134 |
| PNPLA7    | 9q34.3       | 0.20662  | 4.72E-05 | 0.000266134 |
| ENTPD4    | 8p21.3       | 0.206619 | 4.72E-05 | 0.000266134 |
| CYP2C19   | 10q23.33     | 0.206618 | 4.72E-05 | 0.000266134 |
| OCLN      | 5q13.2       | 0.206609 | 4.72E-05 | 0.000266274 |
| RPP21     | 6p22.1       | -0.2066  | 4.73E-05 | 0.000266382 |
| SERPINF2  | 17p13.3      | -0.20659 | 4.73E-05 | 0.000266456 |
| ZNF451    | 6p12.1       | -0.20657 | 4.74E-05 | 0.000266891 |
| VXN       | 8q13.1       | -0.20654 | 4.75E-05 | 0.000267584 |
| PHLPP2    | 16q22.2      | 0.206519 | 4.76E-05 | 0.000267964 |
| AP3S1     | 5q22.3-q23.1 | 0.206433 | 4.80E-05 | 0.000269883 |
| CCND1     | 11q13.3      | -0.20637 | 4.82E-05 | 0.000271173 |
| NADK2     | 5p13.2       | 0.206371 | 4.82E-05 | 0.000271173 |
| TECPR1    | 7q21.3       | 0.206341 | 4.83E-05 | 0.000271808 |
| TFE3      | Xp11.23      | -0.20633 | 4.84E-05 | 0.000271918 |
| GPRC5D    | 12p13.1      | 0.206303 | 4.85E-05 | 0.000272554 |
| MCUB      | 4q25         | 0.206251 | 4.87E-05 | 0.000273685 |
| CDC42BPG  | 11q13.1      | 0.206226 | 4.88E-05 | 0.000274152 |
| RSBN1     | 1p13.2       | 0.206225 | 4.88E-05 | 0.000274152 |
| OMD       | 9q22.31      | -0.20621 | 4.89E-05 | 0.000274441 |
| TMEM47    | Xp21.1       | -0.20621 | 4.89E-05 | 0.000274441 |
| SP6       | 17q21.32     | -0.20619 | 4.90E-05 | 0.000274761 |
| HIF3A     | 19q13.32     | -0.20615 | 4.91E-05 | 0.000275532 |
| SCNN1G    | 16p12.2      | -0.20614 | 4.92E-05 | 0.000275768 |
| EMP2      | 16p13.13     | 0.206134 | 4.92E-05 | 0.000275858 |
| LGALS8    | 1q43         | 0.206124 | 4.93E-05 | 0.000276022 |
| INTS1     | 7p22.3       | -0.20608 | 4.94E-05 | 0.000276883 |
| RPS20     | 8q12.1       | -0.20607 | 4.95E-05 | 0.000277119 |
| BHLHA15   | 7q21.3       | 0.206009 | 4.97E-05 | 0.00027853  |
| IGDCC3    | 15q22.31     | -0.206   | 4.98E-05 | 0.000278665 |
| CUL4A     | 13q34        | -0.20593 | 5.01E-05 | 0.000280156 |
| DAPK2     | 15q22.31     | -0.20591 | 5.02E-05 | 0.000280727 |
| ZNF627    | 19p13.2      | -0.20589 | 5.03E-05 | 0.000281172 |
| RAB18     | 10p12.1      | 0.20585  | 5.04E-05 | 0.000281978 |
| ZBED8     | 5q33.3       | -0.2058  | 5.07E-05 | 0.000283218 |
| SLC16A13  | 17p13.1      | 0.205777 | 5.07E-05 | 0.000283585 |
| PLEKHG5   | 1p36.31      | -0.20577 | 5.08E-05 | 0.000283748 |
| ABCA12    | 2q35         | 0.205758 | 5.08E-05 | 0.000283892 |
| SPIN2B    | Xp11.21      | -0.20574 | 5.09E-05 | 0.000284168 |
| NAE1      | 16q22.1      | -0.20574 | 5.09E-05 | 0.000284178 |
| FLAD1     | 1q21.3       | -0.20573 | 5.10E-05 | 0.000284351 |
| HOXA3     | 7p15.2       | -0.20573 | 5.10E-05 | 0.000284351 |
| UBR7      | 14q32.12     | 0.205718 | 5.10E-05 | 0.000284472 |
| VIRMA     | 8q22.1       | -0.2057  | 5.11E-05 | 0.000284725 |
| CST4      | 20p11.21     | -0.2057  | 5.11E-05 | 0.000284725 |

|            |                 |          |          |             |
|------------|-----------------|----------|----------|-------------|
| VNN2       | 6q23.2          | 0.205693 | 5.11E-05 | 0.000284845 |
| PGAM1      | 10q24.1         | 0.205684 | 5.12E-05 | 0.000284999 |
| RAP1A      | 1p13.2          | 0.205669 | 5.12E-05 | 0.000285289 |
| C3ORF18    | 3p21.31         | -0.20565 | 5.13E-05 | 0.000285759 |
| HES6       | 2q37.3          | -0.20563 | 5.14E-05 | 0.000286003 |
| CLK1       | 2q33.1          | -0.20562 | 5.14E-05 | 0.000286267 |
| IQCB1      | 3q13.33 3q21.1  | -0.20561 | 5.15E-05 | 0.000286407 |
| WDR25      | 14q32.2         | 0.205607 | 5.15E-05 | 0.000286407 |
| COA4       | 11q13.4         | -0.20555 | 5.18E-05 | 0.000287855 |
| NPRL3      | 16p13.3         | -0.20551 | 5.19E-05 | 0.000288709 |
| ABCC10     | 6p21.1          | -0.2055  | 5.20E-05 | 0.000288917 |
| VASP       | 19q13.32        | 0.205408 | 5.24E-05 | 0.000291035 |
| OMA1       | 1p32.2-p32.1    | 0.205401 | 5.24E-05 | 0.000291121 |
| SPDYC      | 11q13.1         | -0.20537 | 5.26E-05 | 0.000291754 |
| SLC22A16   | 6q21 6q21-q22.1 | -0.20537 | 5.26E-05 | 0.000291754 |
| XPO1       | 2p15            | -0.20532 | 5.28E-05 | 0.000292854 |
| PHYHD1     | 9q34.11         | -0.20531 | 5.28E-05 | 0.000293018 |
| TRMT11     | 6q22.32         | -0.2053  | 5.29E-05 | 0.00029313  |
| C11ORF86   | 11q13.2         | 0.205266 | 5.30E-05 | 0.000294036 |
| LAMTOR1    | 11q13.4         | -0.20525 | 5.31E-05 | 0.000294351 |
| SPTLC3     | 20p12.1         | 0.205223 | 5.32E-05 | 0.000294947 |
| AXDND1     | 1q25.2          | 0.205165 | 5.35E-05 | 0.000296345 |
| HTRA2      | 2p13.1          | -0.20514 | 5.36E-05 | 0.000296726 |
| ASIC1      | 12q13.12        | -0.20514 | 5.36E-05 | 0.000296726 |
| ZSCAN26    | 6p22.1          | -0.20505 | 5.40E-05 | 0.000298956 |
| PARD6B     | 20q13.13        | -0.20497 | 5.44E-05 | 0.000300935 |
| PAK1IP1    | 6p24.2          | -0.20496 | 5.44E-05 | 0.000301002 |
| TWISTNB    | 7p21.1          | -0.20496 | 5.44E-05 | 0.000301002 |
| S100G      | Xp22.2          | 0.204959 | 5.44E-05 | 0.000301023 |
| ZNF407     | 18q22.3         | 0.204956 | 5.45E-05 | 0.000301025 |
| SLC37A4    | 11q23.3         | -0.20493 | 5.46E-05 | 0.000301653 |
| RASAL2-AS1 | 1q25.2          | -0.20492 | 5.46E-05 | 0.00030182  |
| VDAC2      | 10q22.2         | 0.204893 | 5.48E-05 | 0.0003024   |
| ENTPD3     | 3p22.1          | 0.204886 | 5.48E-05 | 0.000302505 |
| HAND2      | 4q34.1          | -0.20486 | 5.49E-05 | 0.000303175 |
| MTERF1     | 7q21.2          | -0.20484 | 5.50E-05 | 0.000303429 |
| PSMB1      | 6q27            | -0.20482 | 5.51E-05 | 0.000303843 |
| VSNL1      | 2p24.2          | -0.2048  | 5.52E-05 | 0.000304354 |
| CPA6       | 8q13.2          | -0.20475 | 5.54E-05 | 0.000305502 |
| IMMP1L     | 11p13           | -0.20474 | 5.55E-05 | 0.000305665 |
| SNN        | 16p13.13        | -0.20474 | 5.55E-05 | 0.000305665 |
| RUNDC1     | 17q21.31        | 0.204712 | 5.56E-05 | 0.000306365 |
| AFF1       | 4q21.3-q22.1    | 0.20466  | 5.59E-05 | 0.000307666 |
| URI1       | 19q12           | -0.20465 | 5.59E-05 | 0.000307723 |
| MAPK1      | 22q11.22        | 0.204626 | 5.60E-05 | 0.00030837  |
| ZNF793     | 19q13.12        | -0.20462 | 5.60E-05 | 0.000308464 |
| BORCS5     | 12p13.2         | -0.20461 | 5.61E-05 | 0.00030855  |
| ALG8       | 11q14.1         | -0.2046  | 5.61E-05 | 0.000308806 |
| PPP1R1A    | 12q13.2         | -0.2046  | 5.62E-05 | 0.000308806 |
| CTDNEP1    | 17p13.1         | 0.204576 | 5.63E-05 | 0.000309283 |
| HSPB7      | 1p36.13         | -0.20451 | 5.66E-05 | 0.000310928 |
| CSNK1E     | 22q13.1         | -0.20448 | 5.67E-05 | 0.000311668 |
| GDF9       | 5q31.1          | -0.20448 | 5.67E-05 | 0.000311668 |
| LINC00910  | 17q21.31        | -0.20439 | 5.72E-05 | 0.000313873 |
| DYNLRB2    | 16q23.2         | -0.20439 | 5.72E-05 | 0.000313873 |
| TASP1      | 20p12.1         | -0.20437 | 5.73E-05 | 0.000314342 |
| KLF14      | 7q32.2          | -0.20436 | 5.73E-05 | 0.000314342 |
| DHX36      | 3q25.2          | -0.20435 | 5.74E-05 | 0.000314702 |

|            |                 |          |          |             |
|------------|-----------------|----------|----------|-------------|
| PLCB1      | 20p12.3         | -0.20434 | 5.74E-05 | 0.00031479  |
| CARD16     | 11q22.3         | 0.204313 | 5.75E-05 | 0.000315439 |
| NME2P1     | 12q24.23        | -0.2043  | 5.76E-05 | 0.000315771 |
| CREB5      | 7p15.1          | -0.20427 | 5.77E-05 | 0.000316364 |
| NUGGC      | 8p21.1          | 0.204247 | 5.79E-05 | 0.000316953 |
| PDE5A      | 4q26            | 0.204165 | 5.83E-05 | 0.000319105 |
| TEX11      | Xq13.1          | 0.204147 | 5.84E-05 | 0.000319509 |
| PRPF19     | 11q12.2         | -0.20412 | 5.85E-05 | 0.00032014  |
| PFN1       | 17p13.2         | 0.204076 | 5.87E-05 | 0.000321272 |
| MMD2       | 7p22.1          | -0.20405 | 5.89E-05 | 0.000321969 |
| TLCD5      | 11q23.3         | -0.20404 | 5.89E-05 | 0.000322007 |
| SLC22A18AS | 11p15.4         | 0.20404  | 5.89E-05 | 0.000322007 |
| IL1A       | 2q14.1          | 0.203915 | 5.95E-05 | 0.000325354 |
| HMX1       | 4p16.1          | -0.20391 | 5.96E-05 | 0.000325464 |
| MSI1       | 12q24.31        | -0.20389 | 5.97E-05 | 0.000325835 |
| CHMP4C     | 8q21.13         | -0.20389 | 5.97E-05 | 0.000325835 |
| ACVR1      | 2q24.1          | -0.20388 | 5.97E-05 | 0.000325973 |
| KANK1      | 9p24.3          | -0.20387 | 5.97E-05 | 0.000326112 |
| USP48      | 1p36.12         | 0.203866 | 5.98E-05 | 0.000326181 |
| LOC727896  | 18p11.31        | -0.20385 | 5.99E-05 | 0.000326533 |
| SLC25A40   | 7q21.12         | 0.203819 | 6.00E-05 | 0.000327314 |
| CCNB3      | Xp11.22         | 0.20374  | 6.04E-05 | 0.000329435 |
| ANKRD30BP2 | 21q11.2         | -0.20365 | 6.09E-05 | 0.000331884 |
| DYRK1A     | 21q22.13        | 0.203556 | 6.14E-05 | 0.000334475 |
| SMPX       | Xp22.12         | -0.20351 | 6.16E-05 | 0.000335664 |
| PABPC3     | 13q12.13        | -0.2035  | 6.17E-05 | 0.000335957 |
| LAP3       | 4p15.32         | 0.203488 | 6.17E-05 | 0.000336131 |
| GNS        | 12q14.3         | 0.203477 | 6.18E-05 | 0.000336353 |
| POLR2J4    | 7p13            | -0.20346 | 6.19E-05 | 0.000336818 |
| MAPKAPK5   | 12q24.12-q24.13 | -0.20345 | 6.19E-05 | 0.000336818 |
| NBEAL1     | 2q33.2          | 0.20343  | 6.20E-05 | 0.00033743  |
| NHSL1      | 6q24.1          | 0.203426 | 6.21E-05 | 0.00033745  |
| GNA13      | 17q24.1         | 0.203403 | 6.22E-05 | 0.000338007 |
| SRM        | 1p36.22         | -0.20339 | 6.23E-05 | 0.000338442 |
| C5ORF46    | 5q32            | -0.20332 | 6.26E-05 | 0.000340091 |
| FAM53A     | 4p16.3          | -0.2033  | 6.27E-05 | 0.000340576 |
| LINC00654  | 20p12.3         | -0.2033  | 6.27E-05 | 0.000340627 |
| NOXA1      | 9q34.3          | 0.203275 | 6.29E-05 | 0.000341258 |
| FBXL2      | 3p22.3          | -0.20327 | 6.29E-05 | 0.00034134  |
| HIP1R      | 12q24.31        | 0.203232 | 6.31E-05 | 0.000342324 |
| TJP2       | 9q21.11         | 0.203189 | 6.33E-05 | 0.000343479 |
| SLC25A44   | 1q22            | 0.203185 | 6.33E-05 | 0.000343493 |
| LUC7L3     | 17q21.33        | -0.20318 | 6.34E-05 | 0.000343695 |
| TPCN1      | 12q24.13        | 0.203101 | 6.38E-05 | 0.00034577  |
| ANAPC7     | 12q24.11        | -0.20308 | 6.39E-05 | 0.000346115 |
| NUP50      | 22q13.31        | 0.203083 | 6.39E-05 | 0.000346115 |
| MXRA7      | 17q25.1         | -0.20308 | 6.39E-05 | 0.000346242 |
| CUEDC2     | 10q24.32        | -0.20303 | 6.42E-05 | 0.000347423 |
| RRN3       | 16p13.11        | -0.20303 | 6.42E-05 | 0.000347501 |
| ZNF680     | 7q11.21         | -0.20301 | 6.43E-05 | 0.000347801 |
| TAF9B      | Xq21.1          | -0.20297 | 6.45E-05 | 0.000349069 |
| KIAA1586   | 6p12.1          | -0.20295 | 6.46E-05 | 0.000349498 |
| MRPL45     | 17q12           | -0.20294 | 6.47E-05 | 0.000349576 |
| CXORF56    | Xq24            | -0.20294 | 6.47E-05 | 0.000349635 |
| SLC8A2     | 19q13.32        | -0.20287 | 6.51E-05 | 0.000351536 |
| RPL8       | 8q24.3          | -0.20287 | 6.51E-05 | 0.000351585 |
| IQC�       | 19p13.11        | 0.202859 | 6.51E-05 | 0.000351711 |
| ZNF813     | 19q13.42        | -0.20284 | 6.52E-05 | 0.000352291 |

|           |                 |          |          |             |
|-----------|-----------------|----------|----------|-------------|
| BCAS3     | 17q23.2         | -0.20282 | 6.53E-05 | 0.000352624 |
| RARRES2   | 7q36.1          | -0.20281 | 6.54E-05 | 0.000352783 |
| DNAJC6    | 1p31.3          | -0.20279 | 6.55E-05 | 0.000353375 |
| EXOSC7    | 3p21.31         | -0.20276 | 6.57E-05 | 0.000354229 |
| DCAF17    | 2q31.1          | -0.20272 | 6.59E-05 | 0.000355323 |
| SCUBE3    | 6p21.31         | -0.20272 | 6.59E-05 | 0.000355323 |
| LOC728613 | 5p15.33         | -0.20271 | 6.60E-05 | 0.000355473 |
| IRAK1BP1  | 6q14.1          | -0.20271 | 6.60E-05 | 0.000355473 |
| PRR14     | 16p11.2         | -0.2027  | 6.60E-05 | 0.00035565  |
| PPT1      | 1p34.2          | -0.20263 | 6.64E-05 | 0.000357598 |
| TCAF2     | 7q35            | 0.202625 | 6.64E-05 | 0.000357598 |
| TATDN3    | 1q32.3          | 0.202603 | 6.65E-05 | 0.000358175 |
| ZNF581    | 19q13.42        | -0.20253 | 6.70E-05 | 0.000360327 |
| HEXB      | 5q13.3          | 0.202526 | 6.70E-05 | 0.000360327 |
| CTSF      | 11q13.2         | -0.2025  | 6.71E-05 | 0.000361052 |
| RAB19     | 7q34            | 0.202448 | 6.74E-05 | 0.000362511 |
| WHAMM     | 15q25.2         | 0.202436 | 6.75E-05 | 0.000362791 |
| ANKRD12   | 18p11.22        | 0.202431 | 6.75E-05 | 0.000362845 |
| TBXAS1    | 7q34            | 0.202411 | 6.76E-05 | 0.000363377 |
| C1ORF56   | 1q21.3          | -0.20241 | 6.77E-05 | 0.000363425 |
| CBR1      | 21q22.12        | 0.202354 | 6.80E-05 | 0.00036492  |
| CYP2A7    | 19q13.2         | 0.202336 | 6.81E-05 | 0.00036539  |
| ORC6      | 16q11.2         | -0.2023  | 6.83E-05 | 0.000366469 |
| HOXA10    | 7p15.2          | -0.20225 | 6.86E-05 | 0.000367815 |
| RHOC      | 1p13.2          | 0.202197 | 6.89E-05 | 0.000369407 |
| NECTIN3   | 3q13.13         | 0.202191 | 6.89E-05 | 0.000369483 |
| NRK       | Xq22.3          | -0.20215 | 6.91E-05 | 0.000370551 |
| SFXN5     | 2p13.2          | -0.2021  | 6.95E-05 | 0.00037222  |
| LRRC23    | 12p13.31        | -0.20209 | 6.95E-05 | 0.000372276 |
| MAD1L1    | 7p22.3          | -0.20209 | 6.95E-05 | 0.000372285 |
| CA11      | 19q13.33        | -0.20208 | 6.96E-05 | 0.000372518 |
| SDHAF2    | 11q12.2         | -0.20202 | 6.99E-05 | 0.000374429 |
| LINC00265 | 7p14.1          | -0.202   | 7.00E-05 | 0.000374676 |
| TLL2      | 10q24.1         | 0.201983 | 7.01E-05 | 0.000375257 |
| ZNF501    | 3p21.31         | -0.20198 | 7.02E-05 | 0.000375389 |
| MAN2B2    | 4p16.1          | 0.201939 | 7.04E-05 | 0.00037643  |
| PEAK1     | 15q24.3         | 0.20191  | 7.06E-05 | 0.000377255 |
| EXD3      | 9q34.3          | 0.201902 | 7.06E-05 | 0.000377401 |
| LPIN3     | 20q12           | -0.20189 | 7.07E-05 | 0.000377767 |
| HERPUD1   | 16q13           | 0.201882 | 7.07E-05 | 0.000377845 |
| RPL13     | 16q24.3 17p11.2 | -0.20188 | 7.08E-05 | 0.000377957 |
| DAZAP2    | 12q13.13        | 0.201871 | 7.08E-05 | 0.000377968 |
| A2M-AS1   | 12p13.31        | -0.20187 | 7.08E-05 | 0.000377968 |
| MC1R      | 16q24.3         | -0.20186 | 7.08E-05 | 0.00037806  |
| SART1     | 11q13.1         | -0.20185 | 7.09E-05 | 0.000378289 |
| VPS51     | 11q13.1         | -0.20183 | 7.10E-05 | 0.000378876 |
| DSCR9     | 21q22.13        | -0.20179 | 7.13E-05 | 0.000380072 |
| KATNA1    | 6q25.1          | -0.20173 | 7.16E-05 | 0.000381758 |
| KLF13     | 15q13.3         | 0.201715 | 7.17E-05 | 0.000382312 |
| PRSS53    | 16p11.2         | -0.20171 | 7.18E-05 | 0.000382468 |
| POPDC2    | 3q13.33         | -0.20169 | 7.19E-05 | 0.000382838 |
| TRIOBP    | 22q13.1         | 0.201654 | 7.21E-05 | 0.000383976 |
| PDIK1L    | 1p36.11         | 0.201633 | 7.22E-05 | 0.00038455  |
| ARHGEF2   | 1q22            | 0.20161  | 7.24E-05 | 0.000385174 |
| KRT39     | 17q21.2         | -0.2016  | 7.24E-05 | 0.000385404 |
| AQP7      | 9p13.3          | 0.201592 | 7.25E-05 | 0.000385557 |
| DYNC1I2   | 2q31.1          | -0.20148 | 7.32E-05 | 0.000389243 |
| NOP56     | 20p13           | -0.20145 | 7.34E-05 | 0.000389988 |

|           |               |          |          |             |
|-----------|---------------|----------|----------|-------------|
| SNF8      | 17q21.32      | -0.20143 | 7.35E-05 | 0.000390599 |
| CSTL1     | 20p11.21      | -0.2014  | 7.37E-05 | 0.000391426 |
| LIMK1     | 7q11.23       | -0.20138 | 7.38E-05 | 0.000392144 |
| HSD52     | 1p32.1        | -0.20133 | 7.41E-05 | 0.000393659 |
| DDR1      | 6p21.33       | 0.201303 | 7.43E-05 | 0.000394331 |
| UVRAG     | 11q13.5       | -0.20129 | 7.44E-05 | 0.000394762 |
| CMIP      | 16q23.2-q23.3 | 0.201279 | 7.44E-05 | 0.00039493  |
| HMGB1P1   | 20q13.31      | -0.20127 | 7.45E-05 | 0.000395247 |
| CHMP1B    | 18p11.21      | 0.201262 | 7.45E-05 | 0.000395279 |
| FOXD1     | 5q13.2        | 0.201238 | 7.47E-05 | 0.000395937 |
| ZNF547    | 19q13.43      | -0.20124 | 7.47E-05 | 0.000395937 |
| TBC1D25   | Xp11.23       | -0.20121 | 7.48E-05 | 0.00039655  |
| UBTF      | 17q21.31      | -0.2012  | 7.49E-05 | 0.000396975 |
| NPSR1     | 7p14.3        | 0.201195 | 7.49E-05 | 0.000396975 |
| RBM26     | 13q31.1       | -0.20117 | 7.51E-05 | 0.000397796 |
| MAPK6     | 15q21.2       | 0.201161 | 7.52E-05 | 0.0003979   |
| ATP6V1C1  | 8q22.3        | -0.20114 | 7.53E-05 | 0.000398653 |
| SLC35E1   | 19p13.11      | 0.20113  | 7.54E-05 | 0.000398749 |
| SP140     | 2q37.1        | 0.20112  | 7.54E-05 | 0.000398962 |
| PRKAA2    | 1p32.2        | -0.20111 | 7.55E-05 | 0.000399174 |
| PRR15     | 7p14.3        | -0.20111 | 7.55E-05 | 0.000399199 |
| DCTN5     | 16p12.2       | -0.20108 | 7.57E-05 | 0.000400013 |
| ATP13A2   | 1p36.13       | 0.20105  | 7.59E-05 | 0.0004009   |
| AMH       | 19p13.3       | 0.201038 | 7.59E-05 | 0.000401207 |
| MYLIP     | 6p22.3        | -0.20099 | 7.63E-05 | 0.000402863 |
| BID       | 22q11.21      | -0.20098 | 7.63E-05 | 0.000403063 |
| CEACAM3   | 19q13.2       | 0.200968 | 7.64E-05 | 0.000403267 |
| CCDC9B    | 15q15.1       | -0.20095 | 7.65E-05 | 0.000403763 |
| TRAM2     | 6p12.2        | 0.200933 | 7.66E-05 | 0.000404226 |
| ZNF630    | Xp11.23       | -0.20088 | 7.70E-05 | 0.000406062 |
| TMEM183A  | 1q32.1        | 0.200828 | 7.73E-05 | 0.000407603 |
| TPRA1     | 3q21.3        | -0.20081 | 7.74E-05 | 0.000408115 |
| SEH1L     | 18p11.21      | 0.200791 | 7.75E-05 | 0.000408635 |
| SNHG20    | 17q25.2       | -0.20076 | 7.77E-05 | 0.000409651 |
| ADCY10P1  | 6p21.1        | -0.20075 | 7.78E-05 | 0.000409835 |
| WNT7A     | 3p25.1        | -0.20074 | 7.79E-05 | 0.000410119 |
| LINC00638 | 14q32.33      | -0.2007  | 7.81E-05 | 0.000411301 |
| TMEM67    | 8q22.1        | -0.20068 | 7.83E-05 | 0.000412089 |
| H19       | 11p15.5       | -0.20064 | 7.85E-05 | 0.000413058 |
| ILK       | 11p15.4       | -0.20062 | 7.86E-05 | 0.000413733 |
| LYPD1     | 2q21.2        | -0.2006  | 7.88E-05 | 0.000414312 |
| LOC644669 | 18p11.21      | -0.20059 | 7.89E-05 | 0.000414653 |
| STRIP2    | 7q32.1        | 0.200555 | 7.91E-05 | 0.000415714 |
| FAM53C    | 5q31.2        | -0.2005  | 7.95E-05 | 0.00041759  |
| CTDSPL    | 3p22.2        | 0.200464 | 7.97E-05 | 0.000418688 |
| ITIH3     | 3p21.1        | -0.20043 | 7.99E-05 | 0.000419801 |
| KCTD12    | 13q22.3       | 0.200395 | 8.02E-05 | 0.000420893 |
| TMEM126B  | 11q14.1       | -0.20038 | 8.02E-05 | 0.000421253 |
| PTK2B     | 8p21.2        | 0.200366 | 8.04E-05 | 0.000421705 |
| MAPK8     | 10q11.22      | 0.200338 | 8.05E-05 | 0.000422592 |
| ZNF682    | 19p12         | -0.20024 | 8.12E-05 | 0.00042604  |
| DDX49     | 19p13.11      | -0.20023 | 8.13E-05 | 0.000426112 |
| ANKRD65   | 1p36.33       | -0.20021 | 8.14E-05 | 0.000426908 |
| ZMYND12   | 1p34.2        | 0.200171 | 8.17E-05 | 0.000428097 |
| UBE2I     | 16p13.3       | -0.20016 | 8.17E-05 | 0.000428233 |
| AMT       | 3p21.31       | -0.20015 | 8.18E-05 | 0.00042877  |
| DHX40     | 17q23.1       | -0.20011 | 8.21E-05 | 0.000429981 |
| KIF1C     | 17p13.2       | 0.200102 | 8.22E-05 | 0.000430124 |

|            |              |          |          |             |
|------------|--------------|----------|----------|-------------|
| CST5       | 20p11.21     | -0.20009 | 8.22E-05 | 0.000430233 |
| NAGA       | 22q13.2      | 0.200093 | 8.22E-05 | 0.000430233 |
| PTGDR      | 14q22.1      | 0.200059 | 8.24E-05 | 0.000431345 |
| TTLL2      | 6q27         | -0.20002 | 8.27E-05 | 0.000432461 |
| MAFF       | 22q13.1      | 0.199988 | 8.29E-05 | 0.000433586 |
| IQGAP3     | 1q22         | 0.199987 | 8.29E-05 | 0.000433586 |
| RFT1       | 3p21.1       | -0.19998 | 8.30E-05 | 0.000433808 |
| LRFN2      | 6p21.2-p21.1 | -0.19995 | 8.32E-05 | 0.00043461  |
| GLIS1      | 1p32.3       | -0.19995 | 8.32E-05 | 0.00043461  |
| CDC42      | 1p36.12      | 0.199947 | 8.32E-05 | 0.00043461  |
| ZNF579     | 19q13.42     | -0.19992 | 8.34E-05 | 0.00043548  |
| WDR66      | 12q24.31     | -0.19992 | 8.34E-05 | 0.00043548  |
| RFESD      | 5q15         | 0.199887 | 8.36E-05 | 0.000436425 |
| BTBD6      | 14q32.33     | 0.199843 | 8.39E-05 | 0.00043794  |
| FGFBP1     | 4p15.32      | 0.199821 | 8.41E-05 | 0.000438646 |
| LOC143188  | 10q25.2      | -0.19971 | 8.49E-05 | 0.000442605 |
| PDP1       | 8q22.1       | -0.19968 | 8.51E-05 | 0.000443717 |
| SOAT2      | 12q13.13     | -0.19967 | 8.52E-05 | 0.000443949 |
| TRANK1     | 3p22.2       | 0.199664 | 8.52E-05 | 0.000443949 |
| MRPL33     | 2p23.2       | -0.19964 | 8.54E-05 | 0.000444848 |
| ANKRD36BP1 | 1q24.2       | 0.199581 | 8.58E-05 | 0.000446816 |
| HSBP1L1    | 18q23        | 0.199518 | 8.63E-05 | 0.000449057 |
| FAM43B     | 1p36.12      | -0.19951 | 8.63E-05 | 0.000449214 |
| FAM216A    | 12q24.11     | -0.19949 | 8.64E-05 | 0.000449692 |
| METTL2B    | 7q32.1       | -0.19949 | 8.64E-05 | 0.000449692 |
| ICMT       | 1p36.31      | 0.199441 | 8.68E-05 | 0.000451494 |
| EPB41L1    | 20q11.23     | -0.19941 | 8.70E-05 | 0.000452496 |
| ZBTB8B     | 1p35.1       | -0.19937 | 8.74E-05 | 0.000454108 |
| MEGF9      | 9q33.2       | 0.199329 | 8.76E-05 | 0.000455349 |
| GDPD2      | Xq13.1       | 0.19927  | 8.81E-05 | 0.000457502 |
| WDR46      | 6p21.32      | -0.19925 | 8.82E-05 | 0.000458203 |
| NUDT11     | Xp11.22      | -0.19924 | 8.83E-05 | 0.000458575 |
| S1PR4      | 19p13.3      | 0.199217 | 8.85E-05 | 0.00045915  |
| SPRED1     | 15q14        | 0.199192 | 8.86E-05 | 0.000459987 |
| TIGD4      | 4q31.3       | -0.19911 | 8.93E-05 | 0.000463158 |
| DMTF1      | 7q21.12      | -0.1991  | 8.93E-05 | 0.000463158 |
| METTL14    | 4q26         | 0.199074 | 8.95E-05 | 0.000464165 |
| HEY2       | 6q22.31      | -0.19907 | 8.95E-05 | 0.000464165 |
| ACSM3      | 16p12.3      | 0.199067 | 8.96E-05 | 0.000464203 |
| TTC7A      | 2p21         | 0.199046 | 8.97E-05 | 0.000464862 |
| RGL1       | 1q25.3       | -0.19904 | 8.97E-05 | 0.000464862 |
| MYDGF      | 19p13.3      | 0.199041 | 8.98E-05 | 0.000464867 |
| SUGP1      | 19p13.11     | -0.19903 | 8.98E-05 | 0.000465097 |
| CAPN14     | 2p23.1       | 0.199003 | 9.00E-05 | 0.000466086 |
| ENO3       | 17p13.2      | -0.19899 | 9.02E-05 | 0.000466643 |
| FAHD2B     | 2q11.2       | -0.19898 | 9.02E-05 | 0.000466654 |
| ANKRD1     | 10q23.31     | -0.19898 | 9.02E-05 | 0.000466654 |
| GATAD1     | 7q21.2       | -0.19897 | 9.03E-05 | 0.000466799 |
| CCDC60     | 12q24.23     | 0.198892 | 9.09E-05 | 0.000469784 |
| TMEM106A   | 17q21.31     | 0.198882 | 9.10E-05 | 0.000470065 |
| OTUD1      | 10p12.2      | 0.198865 | 9.11E-05 | 0.000470626 |
| SMG5       | 1q22         | -0.19885 | 9.12E-05 | 0.000471188 |
| HMGA2      | 12q14.3      | -0.19884 | 9.13E-05 | 0.000471488 |
| ASCC1      | 10q22.1      | -0.19883 | 9.14E-05 | 0.000471755 |
| MAP3K7     | 6q15         | -0.19878 | 9.18E-05 | 0.000473639 |
| LPAL2      | 6q25.3       | -0.19875 | 9.20E-05 | 0.00047451  |
| CFAP20     | 16q21        | -0.19875 | 9.20E-05 | 0.00047451  |
| C2ORF76    | 2q14.2       | -0.19871 | 9.22E-05 | 0.000475769 |



|            |               |          |          |             |
|------------|---------------|----------|----------|-------------|
| SLC47A2    | 17p11.2       | 0.198685 | 9.25E-05 | 0.000476746 |
| CFD        | 19p13.3       | 0.19864  | 9.28E-05 | 0.000478392 |
| TRMT2B     | Xq22.1        | -0.19864 | 9.28E-05 | 0.000478415 |
| GLG1       | 16q23.1       | 0.198631 | 9.29E-05 | 0.000478506 |
| ELOVL6     | 4q25          | 0.198613 | 9.30E-05 | 0.000479102 |
| DBX1       | 11p15.1       | -0.1986  | 9.31E-05 | 0.000479413 |
| UBFD1      | 16p12.2       | -0.19856 | 9.34E-05 | 0.000481062 |
| CYP2B6     | 19q13.2       | -0.19852 | 9.37E-05 | 0.000482458 |
| FRG1BP     | 20q11.1       | -0.19848 | 9.41E-05 | 0.000483988 |
| ZNF280B    | 22q11.22      | -0.19846 | 9.42E-05 | 0.000484548 |
| PTCH1      | 9q22.32       | -0.19843 | 9.44E-05 | 0.000485573 |
| ZRSR2      | Xp22.2        | -0.19843 | 9.44E-05 | 0.000485573 |
| ZNF737     | 19p12         | -0.19842 | 9.45E-05 | 0.000485969 |
| INPPL1     | 11q13.4       | -0.19841 | 9.46E-05 | 0.000486235 |
| ZNF708     | 19p12         | -0.19839 | 9.47E-05 | 0.000486762 |
| TNIK       | 3q26.2-q26.31 | 0.198375 | 9.49E-05 | 0.00048729  |
| LAMA5      | 20q13.33      | -0.19837 | 9.49E-05 | 0.000487496 |
| TAMM41     | 3p25.2        | -0.19833 | 9.53E-05 | 0.000488981 |
| RBM42      | 19q13.12      | -0.19832 | 9.53E-05 | 0.000488981 |
| CHN1       | 2q31.1        | -0.19831 | 9.54E-05 | 0.000489371 |
| PPP2R5A    | 1q32.3        | 0.198307 | 9.54E-05 | 0.000489412 |
| LRRC52-AS1 | 1q23.3-q24.1  | -0.19829 | 9.55E-05 | 0.000489777 |
| GTF3C2     | 2p23.3        | -0.19827 | 9.57E-05 | 0.000490631 |
| LINC00552  | 13q34         | -0.19825 | 9.59E-05 | 0.000491409 |
| CPNE6      | 14q11.2       | -0.19824 | 9.59E-05 | 0.000491692 |
| CA13       | 8q21.2        | 0.19823  | 9.60E-05 | 0.00049192  |
| GDI1       | Xq28          | -0.19817 | 9.65E-05 | 0.000494347 |
| TLR6       | 4p14          | 0.19815  | 9.67E-05 | 0.000494946 |
| LINGO4     | 1q21.3        | 0.198098 | 9.71E-05 | 0.000496941 |
| PLA2G5     | 1p36.13       | -0.19804 | 9.76E-05 | 0.000499283 |
| OSBPL2     | 20q13.33      | -0.19803 | 9.76E-05 | 0.000499495 |
| TBC1D15    | 12q21.1       | 0.198017 | 9.77E-05 | 0.000499929 |
| MIR99AHG   | 21q21.1       | -0.19801 | 9.78E-05 | 0.000500204 |
| C11ORF24   | 11q13.2       | 0.197981 | 9.80E-05 | 0.000501128 |
| FRMD4A     | 10p13         | -0.19796 | 9.82E-05 | 0.000501868 |
| UBL5       | 19p13.2       | -0.19793 | 9.84E-05 | 0.000502787 |
| PLA2G4E    | 15q15.1       | -0.19793 | 9.84E-05 | 0.000502787 |
| BRI3BP     | 12q24.31      | 0.197923 | 9.85E-05 | 0.00050306  |
| PEX11A     | 15q26.1       | 0.197898 | 9.87E-05 | 0.000503963 |
| HIST1H2AE  | 6p22.2        | -0.19787 | 9.89E-05 | 0.000504896 |
| PPIP5K2    | 5q21.1        | 0.197844 | 9.91E-05 | 0.000505956 |
| TREML2     | 6p21.1        | -0.19783 | 9.93E-05 | 0.000506426 |
| SSR4       | Xq28          | -0.19778 | 9.97E-05 | 0.000508444 |
| PGAM4      | Xq21.1        | 0.197754 | 9.99E-05 | 0.000509348 |
| ZNF620     | 3p22.1        | -0.19773 | 0.0001   | 0.000510157 |
| CIR1       | 2q31.1        | -0.1977  | 0.0001   | 0.000511297 |
| HMSD       | 18q22.1       | 0.197683 | 0.0001   | 0.000511966 |
| NAA16      | 13q14.11      | -0.19763 | 0.000101 | 0.000513984 |
| DENND5A    | 11p15.4       | -0.19762 | 0.000101 | 0.000514191 |
| IL6R       | 1q21.3        | 0.197589 | 0.000101 | 0.000515563 |
| CCDC22     | Xp11.23       | -0.19758 | 0.000101 | 0.000515827 |
| ACD        | 16q22.1       | -0.19756 | 0.000101 | 0.000516375 |
| NUP35      | 2q32.1        | -0.19755 | 0.000102 | 0.000516823 |
| KLRB1      | 12p13.31      | 0.197492 | 0.000102 | 0.000519188 |
| RDH5       | 12q13.2       | 0.197488 | 0.000102 | 0.000519202 |
| HARBI1     | 11p11.2       | -0.19749 | 0.000102 | 0.000519202 |
| KCNJ8      | 12p12.1       | -0.19746 | 0.000102 | 0.000520198 |
| LRIF1      | 1p13.3        | -0.19745 | 0.000102 | 0.000520292 |

|           |               |          |          |             |
|-----------|---------------|----------|----------|-------------|
| SLIT1     | 10q24.1       | -0.19745 | 0.000102 | 0.000520292 |
| UNKL      | 16p13.3       | -0.19744 | 0.000102 | 0.000520487 |
| GRAP2     | 22q13.1       | 0.197419 | 0.000103 | 0.000521415 |
| C17ORF75  | 17q11.2       | -0.19741 | 0.000103 | 0.000521826 |
| GPD1L     | 3p22.3        | 0.1974   | 0.000103 | 0.000521944 |
| GPR15     | 3q11.2        | 0.197394 | 0.000103 | 0.000522066 |
| RTL8A     | Xq26.3        | -0.19737 | 0.000103 | 0.000522998 |
| ITGA2     | 5q11.2        | 0.197294 | 0.000104 | 0.000526147 |
| SMAD4     | 18q21.2       | 0.197289 | 0.000104 | 0.000526239 |
| UBE2J1    | 6q15          | 0.197284 | 0.000104 | 0.000526302 |
| MRPS28    | 8q21.13       | -0.19727 | 0.000104 | 0.000526973 |
| PLGRKT    | 9p24.1        | 0.197227 | 0.000104 | 0.000528518 |
| KDM6B     | 17p13.1       | 0.197209 | 0.000104 | 0.000529192 |
| SMURF2    | 17q23.3-q24.1 | -0.1972  | 0.000105 | 0.000529444 |
| CXORF49B  | Xq13.1        | -0.19719 | 0.000105 | 0.000529521 |
| CTNNBIP1  | 1p36.22       | 0.197143 | 0.000105 | 0.000531644 |
| SKIDA1    | 10p12.31      | -0.19712 | 0.000105 | 0.000532421 |
| HOXA1     | 7p15.2        | -0.1971  | 0.000105 | 0.000533412 |
| ESPNP     | 1p36.13       | -0.19709 | 0.000105 | 0.000533469 |
| IRAK1     | Xq28          | -0.19708 | 0.000106 | 0.000533771 |
| ACTR8     | 3p21.1        | -0.19708 | 0.000106 | 0.000533771 |
| MGME1     | 20p11.23      | -0.19706 | 0.000106 | 0.000534717 |
| STX19     | 3q11.2        | 0.197045 | 0.000106 | 0.000535029 |
| CCND3     | 6p21.1        | 0.197039 | 0.000106 | 0.000535169 |
| POMP      | 13q12.3       | -0.19703 | 0.000106 | 0.000535329 |
| ASIC3     | 7q36.1        | 0.197005 | 0.000106 | 0.000536384 |
| UGGT2     | 13q32.1       | -0.197   | 0.000106 | 0.000536448 |
| GPR17     | 2q14.3        | -0.197   | 0.000106 | 0.000536448 |
| IL18R1    | 2q12.1        | 0.196981 | 0.000106 | 0.000536936 |
| LEO1      | 15q21.2       | 0.19698  | 0.000106 | 0.000536936 |
| TARP      | 7p14.1        | 0.19697  | 0.000107 | 0.000537247 |
| XKRX      | Xq22.1        | -0.19696 | 0.000107 | 0.000537638 |
| KDELR2    | 7p22.1        | 0.19695  | 0.000107 | 0.000537856 |
| TBKBP1    | 17q21.32      | -0.19693 | 0.000107 | 0.000538771 |
| ARL6IP6   | 2q23.3        | -0.19692 | 0.000107 | 0.000538845 |
| GTPBP1    | 22q13.1       | 0.196913 | 0.000107 | 0.000538892 |
| FOXD4L6   | 9p11.2        | 0.196912 | 0.000107 | 0.000538892 |
| BEGAIN    | 14q32.2       | 0.196912 | 0.000107 | 0.000538892 |
| TRAPPC2B  | 19q13.43      | -0.1969  | 0.000107 | 0.000539202 |
| HOOK3     | 8p11.21       | -0.1969  | 0.000107 | 0.000539354 |
| MYOZ3     | 5q33.1        | -0.19685 | 0.000108 | 0.000541171 |
| THRAP3    | 1p34.3        | 0.196822 | 0.000108 | 0.000542362 |
| ZC3H12C   | 11q22.3       | 0.196798 | 0.000108 | 0.000543263 |
| TCIM      | 8p11.21       | 0.196795 | 0.000108 | 0.000543263 |
| ANXA13    | 8q24.13       | 0.196765 | 0.000108 | 0.000544486 |
| NAV3      | 12q21.2       | -0.19669 | 0.000109 | 0.000547731 |
| DMWD      | 19q13.32      | -0.19668 | 0.000109 | 0.000548065 |
| HIST2H4A  | 1q21.2        | -0.19663 | 0.00011  | 0.000550105 |
| AVEN      | 15q14         | -0.19663 | 0.00011  | 0.000550105 |
| PEX5      | 12p13.31      | -0.19661 | 0.00011  | 0.000550854 |
| CDC42BPA  | 1q42.13       | 0.196598 | 0.00011  | 0.000551184 |
| CDH2      | 18q12.1       | -0.19658 | 0.00011  | 0.000551895 |
| TFPT      | 19q13.42      | -0.19655 | 0.00011  | 0.000552913 |
| CHST4     | 16q22.2       | 0.196551 | 0.00011  | 0.000552913 |
| PRR26     | 10p15.3       | 0.196541 | 0.00011  | 0.000553252 |
| FAM3A     | Xq28          | -0.19652 | 0.000111 | 0.000553848 |
| LINC01558 | 6q27          | -0.19652 | 0.000111 | 0.000553955 |
| NEDD4     | 15q21.3       | -0.19652 | 0.000111 | 0.000553963 |

|              |               |          |          |             |
|--------------|---------------|----------|----------|-------------|
| BNIP3L       | 8p21.2        | 0.196503 | 0.000111 | 0.000554403 |
| FXVD1        | 19q13.12      | -0.19646 | 0.000111 | 0.000556424 |
| ATPAF2       | 17p11.2       | 0.196445 | 0.000111 | 0.0005568   |
| PTCD1        | 7q22.1        | -0.19644 | 0.000111 | 0.000556908 |
| HSD17B13     | 4q22.1        | 0.196398 | 0.000112 | 0.000558658 |
| OLFM2        | 19p13.2       | -0.19637 | 0.000112 | 0.000559621 |
| HNRNPF       | 10q11.21      | 0.196369 | 0.000112 | 0.00055969  |
| C19ORF73     | 19q13.33      | -0.19635 | 0.000112 | 0.000560263 |
| CLSPN        | 1p34.3        | 0.196318 | 0.000112 | 0.00056176  |
| BAMBI        | 10p12.1       | -0.19622 | 0.000113 | 0.000566226 |
| N4BP2        | 4p14          | 0.196103 | 0.000114 | 0.000571482 |
| HTR7P1       | 12p13.1       | -0.19609 | 0.000115 | 0.000571956 |
| LRRC19       | 9p21.2        | 0.196064 | 0.000115 | 0.000573067 |
| CXCR4        | 2q22.1        | 0.196054 | 0.000115 | 0.00057338  |
| PPP1R3C      | 10q23.32      | -0.196   | 0.000115 | 0.000575621 |
| PLEK2        | 14q23.3-q24.1 | 0.195992 | 0.000115 | 0.000576006 |
| MPP2         | 17q21.31      | -0.19594 | 0.000116 | 0.000578471 |
| CLTCL1       | 22q11.21      | -0.19592 | 0.000116 | 0.000579031 |
| ABHD11-AS1   | 7q11.23       | 0.195919 | 0.000116 | 0.000579031 |
| TAPT1        | 4p15.32       | 0.1959   | 0.000116 | 0.00057978  |
| UFSP1        | 7q22.1        | -0.1959  | 0.000116 | 0.00057978  |
| LGALS9C      | 17p11.2       | 0.19587  | 0.000117 | 0.000580932 |
| ANKRD13A     | 12q24.11      | 0.195866 | 0.000117 | 0.000580982 |
| ZFYVE9       | 1p32.3        | 0.1958   | 0.000117 | 0.000584002 |
| PPHLN1       | 12q12         | -0.19576 | 0.000118 | 0.000585641 |
| HIST1H2BG    | 6p22.2        | -0.19573 | 0.000118 | 0.000587067 |
| MRPL57       | 13q12.11      | -0.19572 | 0.000118 | 0.00058716  |
| IL16         | 15q25.1       | 0.195721 | 0.000118 | 0.000587179 |
| ZNF614       | 19q13.41      | -0.19571 | 0.000118 | 0.000587634 |
| RABEP1       | 17p13.2       | 0.195673 | 0.000119 | 0.00058921  |
| ECHS1        | 10q26.3       | 0.195665 | 0.000119 | 0.000589427 |
| MFSD4A       | 1q32.1        | 0.195663 | 0.000119 | 0.000589427 |
| HAUS5        | 19q13.12      | -0.19565 | 0.000119 | 0.000589737 |
| LDLRAP1      | 1p36.11       | 0.19565  | 0.000119 | 0.000589737 |
| DOT1L        | 19p13.3       | 0.195622 | 0.000119 | 0.000590964 |
| OGT          | Xq13.1        | -0.1956  | 0.000119 | 0.000592089 |
| CYS1         | 2p25.1        | -0.19559 | 0.000119 | 0.000592245 |
| SNX25        | 4q35.1        | -0.19557 | 0.00012  | 0.000593247 |
| BDKRB2       | 14q32.2       | 0.195542 | 0.00012  | 0.000594156 |
| ZNF562       | 19p13.2       | 0.195541 | 0.00012  | 0.000594156 |
| GSDMA        | 17q21.1       | 0.195514 | 0.00012  | 0.000595329 |
| RNF170       | 8p11.21       | -0.19549 | 0.00012  | 0.000596319 |
| NEURL3       | 2q11.2        | -0.19549 | 0.00012  | 0.000596319 |
| SNAP29       | 22q11.21      | 0.195479 | 0.00012  | 0.000596566 |
| TRA2A        | 7p15.3        | -0.19545 | 0.000121 | 0.000598048 |
| DDX55        | 12q24.31      | -0.19544 | 0.000121 | 0.000598248 |
| DSG1         | 18q12.1       | -0.19543 | 0.000121 | 0.000598463 |
| DNAJC5       | 20q13.33      | -0.19543 | 0.000121 | 0.000598616 |
| PIK3R3       | 1p34.1        | 0.1954   | 0.000121 | 0.000599681 |
| SEPHS1       | 10p13         | -0.19539 | 0.000121 | 0.00060023  |
| ANXA2        | 15q22.2       | 0.195343 | 0.000122 | 0.000602187 |
| LOC100272217 | 9q34.11       | -0.19529 | 0.000122 | 0.000604788 |
| ANP32E       | 1q21.2        | 0.195267 | 0.000123 | 0.000605533 |
| WDR45        | Xp11.23       | -0.19527 | 0.000123 | 0.000605533 |
| MEPCE        | 7q22.1        | -0.19524 | 0.000123 | 0.000606674 |
| LINC-PINT    | 7q32.3        | -0.19517 | 0.000124 | 0.000610135 |
| PCDHGC3      | 5q31.3        | -0.19512 | 0.000124 | 0.00061244  |
| COPS9        | 2q37.3        | -0.1951  | 0.000124 | 0.000613453 |

|          |          |          |          |             |
|----------|----------|----------|----------|-------------|
| GATC     | 12q24.31 | -0.19506 | 0.000125 | 0.000615239 |
| OTOF     | 2p23.3   | -0.19502 | 0.000125 | 0.000616619 |
| SMIM26   | 20p11.23 | -0.19502 | 0.000125 | 0.000616619 |
| DBNDD2   | 20q13.12 | -0.195   | 0.000125 | 0.000617834 |
| SEC24C   | 10q22.2  | 0.194987 | 0.000125 | 0.000618126 |
| MB21D2   | 3q29     | -0.19496 | 0.000126 | 0.00061955  |
| PNPLA3   | 22q13.31 | 0.194944 | 0.000126 | 0.000619927 |
| NHEG1    | 6q23.3   | -0.19494 | 0.000126 | 0.000619927 |
| PPEF1    | Xp22.13  | -0.19489 | 0.000126 | 0.000622357 |
| SLC52A1  | 17p13.2  | 0.194884 | 0.000126 | 0.000622592 |
| HNF4A    | 20q13.12 | -0.19486 | 0.000127 | 0.000623654 |
| BAAT     | 9q31.1   | -0.19485 | 0.000127 | 0.000623989 |
| ZNF488   | 10q11.22 | 0.194831 | 0.000127 | 0.000624761 |
| IRAK4    | 12q12    | -0.19483 | 0.000127 | 0.000624761 |
| HAND1    | 5q33.2   | -0.1948  | 0.000127 | 0.000626162 |
| PTPRN    | 2q35     | -0.1948  | 0.000127 | 0.000626162 |
| YME1L1   | 10p12.1  | 0.194767 | 0.000128 | 0.000627465 |
| TLE1     | 9q21.32  | 0.194713 | 0.000128 | 0.000630069 |
| KCNK10   | 14q31.3  | 0.19469  | 0.000128 | 0.000631091 |
| RHOA     | 3p21.31  | 0.194598 | 0.000129 | 0.000635697 |
| XRN2     | 20p11.22 | -0.1946  | 0.000129 | 0.000635697 |
| RASA4CP  | 7p13     | 0.194586 | 0.00013  | 0.000635954 |
| FAM118B  | 11q24.2  | 0.194584 | 0.00013  | 0.000635954 |
| FADS1    | 11q12.2  | -0.19455 | 0.00013  | 0.000637539 |
| TMEM121  | 14q32.33 | -0.19454 | 0.00013  | 0.000637718 |
| IPW      | 15q11.2  | -0.19453 | 0.00013  | 0.000638389 |
| DRC1     | 2p23.3   | -0.19451 | 0.00013  | 0.000639263 |
| TBC1D8   | 2q11.2   | 0.194505 | 0.00013  | 0.000639263 |
| HHLA2    | 3q13.13  | 0.194478 | 0.000131 | 0.000640509 |
| LPCAT1   | 5p15.33  | 0.194475 | 0.000131 | 0.000640543 |
| BAG4     | 8p11.23  | 0.194472 | 0.000131 | 0.000640554 |
| KLHL7    | 7p15.3   | -0.19441 | 0.000131 | 0.000643727 |
| GP5      | 3q29     | -0.19428 | 0.000133 | 0.000650121 |
| CD27-AS1 | 12p13.31 | -0.19426 | 0.000133 | 0.000651393 |
| SPG7     | 16q24.3  | -0.19425 | 0.000133 | 0.000651679 |
| GRID2IP  | 7p22.1   | -0.1942  | 0.000134 | 0.000653981 |
| PABPC1   | 8q22.3   | -0.19419 | 0.000134 | 0.000654583 |
| RASL12   | 15q22.31 | -0.19418 | 0.000134 | 0.000654744 |
| TMEM200B | 1p35.3   | -0.19412 | 0.000134 | 0.000657591 |
| FAM210B  | 20q13.2  | -0.1941  | 0.000135 | 0.000658616 |
| UGT2B7   | 4q13.2   | 0.194085 | 0.000135 | 0.0006594   |
| PEAR1    | 1q23.1   | 0.194073 | 0.000135 | 0.000659862 |
| CCDC137  | 17q25.3  | -0.19407 | 0.000135 | 0.000659945 |
| ASH2L    | 8p11.23  | 0.194066 | 0.000135 | 0.000659945 |
| NGFR     | 17q21.33 | -0.19406 | 0.000135 | 0.000660141 |
| PPP1R1B  | 17q12    | 0.194014 | 0.000136 | 0.000662397 |
| RUFY1    | 5q35.3   | 0.19401  | 0.000136 | 0.000662432 |
| TBCC     | 6p21.1   | -0.19401 | 0.000136 | 0.000662513 |
| RPS27A   | 2p16.1   | -0.19397 | 0.000136 | 0.000664347 |
| RELL2    | 5q31.3   | -0.19393 | 0.000137 | 0.00066615  |
| MIR22HG  | 17p13.3  | 0.193928 | 0.000137 | 0.000666232 |
| TMBIM1   | 2q35     | 0.193901 | 0.000137 | 0.000667538 |
| SLPI     | 20q13.12 | 0.193852 | 0.000138 | 0.000670016 |
| VPS13A   | 9q21.2   | 0.193733 | 0.000139 | 0.000676353 |
| GXYLT2   | 3p13     | -0.19371 | 0.000139 | 0.000677489 |
| GMFB     | 14q22.2  | 0.193682 | 0.000139 | 0.000678851 |
| DISP2    | 15q15.1  | 0.193655 | 0.00014  | 0.000680144 |
| FLJ25758 | 19p13.2  | -0.19361 | 0.00014  | 0.000682711 |

|          |              |          |          |             |
|----------|--------------|----------|----------|-------------|
| CD44     | 11p13        | 0.193587 | 0.00014  | 0.000683584 |
| WDR83    | 19p13.13     | -0.19354 | 0.000141 | 0.000686189 |
| CATSPER1 | 11q13.1      | -0.19349 | 0.000142 | 0.000688498 |
| POLR2J3  | 7q22.1       | -0.19348 | 0.000142 | 0.000689033 |
| DNAJA2   | 16q11.2      | -0.19343 | 0.000142 | 0.000691839 |
| SLC39A9  | 14q24.1      | 0.193339 | 0.000143 | 0.000696606 |
| IFITM1   | 11p15.5      | -0.19333 | 0.000143 | 0.000696862 |
| GRB14    | 2q24.3       | -0.19328 | 0.000144 | 0.000699394 |
| PHF8     | Xp11.22      | -0.19328 | 0.000144 | 0.000699394 |
| HAVCR1P1 | 19p12        | -0.19326 | 0.000144 | 0.000700164 |
| FRMPD2   | 10q11.22     | 0.193241 | 0.000144 | 0.000701277 |
| TXLNB    | 6q24.1       | -0.19324 | 0.000145 | 0.00070137  |
| SEPHS1P1 | 7q11.21      | -0.1932  | 0.000145 | 0.000703359 |
| JHY      | 11q24.1      | -0.19319 | 0.000145 | 0.000703558 |
| PRKCA    | 17q24.2      | 0.193141 | 0.000146 | 0.00070629  |
| IL7      | 8q21.13      | 0.193106 | 0.000146 | 0.000708137 |
| FBL      | 19q13.2      | -0.1931  | 0.000146 | 0.000708274 |
| WWC3     | Xp22.2       | -0.19308 | 0.000146 | 0.000709089 |
| CCDC73   | 11p13        | -0.19306 | 0.000147 | 0.000710004 |
| SIN3B    | 19p13.11     | -0.19306 | 0.000147 | 0.000710056 |
| CIB2     | 15q25.1      | -0.19306 | 0.000147 | 0.000710056 |
| ANKRD16  | 10p15.1      | -0.19304 | 0.000147 | 0.000710638 |
| TMPRSS6  | 22q12.3      | -0.19294 | 0.000148 | 0.000716463 |
| PLEKHA8  | 7p14.3       | -0.19292 | 0.000148 | 0.000717186 |
| ATM      | 11q22.3      | -0.19292 | 0.000148 | 0.000717186 |
| PGM2     | 4p14         | 0.192915 | 0.000148 | 0.000717412 |
| MFS14C   | 9q22.33      | -0.1929  | 0.000149 | 0.000718292 |
| CD3E     | 11q23.3      | 0.192879 | 0.000149 | 0.000719175 |
| METRNL   | 17q25.3      | 0.192826 | 0.000149 | 0.000722057 |
| ANXA2R   | 5p12         | 0.192801 | 0.00015  | 0.000723327 |
| NUDT16L1 | 16p13.3      | -0.19277 | 0.00015  | 0.000725267 |
| TYRP1    | 9p23         | -0.19274 | 0.00015  | 0.000726614 |
| SH3BP4   | 2q37.2       | -0.19268 | 0.000151 | 0.000729642 |
| AFF4     | 5q31.1       | 0.192678 | 0.000151 | 0.000729797 |
| HLCS     | 21q22.13     | 0.192676 | 0.000151 | 0.000729797 |
| TRAPPC9  | 8q24.3       | -0.19262 | 0.000152 | 0.000732961 |
| MFRP     | 11q23.3      | -0.19261 | 0.000152 | 0.000733064 |
| HOXB6    | 17q21.32     | 0.192577 | 0.000152 | 0.000735143 |
| PDE7A    | 8q13.1       | -0.19257 | 0.000153 | 0.00073531  |
| DDIT4L   | 4q24         | -0.19254 | 0.000153 | 0.000737106 |
| COX20    | 1q44         | -0.19248 | 0.000154 | 0.00074014  |
| ZNF142   | 2q35         | -0.19247 | 0.000154 | 0.000740887 |
| ZNF649   | 19q13.41     | -0.19245 | 0.000154 | 0.000741763 |
| CGB5     | 19q13.33     | -0.19239 | 0.000155 | 0.000745454 |
| CDH8     | 16q21        | -0.19235 | 0.000155 | 0.000747636 |
| GHITM    | 10q23.1      | 0.192319 | 0.000156 | 0.000748995 |
| PRKAR2B  | 7q22.3       | 0.192318 | 0.000156 | 0.000748995 |
| ORC5     | 7q22.1-q22.2 | -0.19231 | 0.000156 | 0.00074901  |
| MLLT3    | 9p21.3       | -0.19229 | 0.000156 | 0.000750402 |
| SLC30A5  | 5q13.1-q13.2 | 0.192275 | 0.000156 | 0.000751094 |
| C12ORF57 | 12p13.31     | 0.192257 | 0.000156 | 0.000751937 |
| HMBX1    | 8p21.1-p12   | 0.192255 | 0.000156 | 0.000751937 |
| TNFRSF17 | 16p13.13     | 0.192217 | 0.000157 | 0.000753868 |
| ZNF518B  | 4p16.1       | -0.19221 | 0.000157 | 0.000753868 |
| FAM136A  | 2p13.3       | -0.19221 | 0.000157 | 0.000753868 |
| SPSB4    | 3q23         | -0.19219 | 0.000157 | 0.000754888 |
| HRNR     | 1q21.3       | -0.19219 | 0.000157 | 0.000754967 |
| ACTL6A   | 3q26.33      | -0.19214 | 0.000158 | 0.000757684 |

|           |               |          |          |             |
|-----------|---------------|----------|----------|-------------|
| SLC5A3    | 21q22.11      | 0.19211  | 0.000158 | 0.000759446 |
| PPP1R11   | 6p22.1        | 0.192075 | 0.000159 | 0.000761437 |
| C19ORF44  | 19p13.11      | -0.19207 | 0.000159 | 0.000761848 |
| HTRA3     | 4p16.1        | -0.19205 | 0.000159 | 0.000762351 |
| LRRC37B   | 17q11.2       | -0.19202 | 0.000159 | 0.000763965 |
| TWINK     | 10q24.31      | -0.19193 | 0.000161 | 0.0007699   |
| CCR6      | 6q27          | 0.19192  | 0.000161 | 0.000770022 |
| ESCO2     | 8p21.1        | 0.191897 | 0.000161 | 0.000771291 |
| ZNF773    | 19q13.43      | -0.19181 | 0.000162 | 0.000776727 |
| MT3       | 16q13         | -0.19178 | 0.000162 | 0.000777977 |
| ARPIN     | 15q26.1       | 0.191779 | 0.000163 | 0.000778    |
| RAB23     | 6p12.1-p11.2  | -0.19178 | 0.000163 | 0.000778    |
| TEAD4     | 12p13.33      | -0.19177 | 0.000163 | 0.000778    |
| PKNOX1    | 21q22.3       | 0.191757 | 0.000163 | 0.000778918 |
| CEACAM20  | 19q13.31      | 0.191747 | 0.000163 | 0.000779356 |
| TTC26     | 7q34          | -0.19173 | 0.000163 | 0.00078     |
| C19ORF38  | 19p13.2       | 0.191713 | 0.000163 | 0.000781082 |
| TRAT1     | 3q13.13       | 0.1917   | 0.000164 | 0.000781705 |
| RDH12     | 14q24.1       | -0.19166 | 0.000164 | 0.000783835 |
| ZNF23     | 16q22.2       | -0.19166 | 0.000164 | 0.000783835 |
| OCA2      | 15q12-q13.1   | -0.19166 | 0.000164 | 0.000783966 |
| MKS1      | 17q22         | -0.19165 | 0.000164 | 0.000784097 |
| HAND2-AS1 | 4q34.1        | -0.19159 | 0.000165 | 0.000787216 |
| STAT5B    | 17q21.2       | -0.19159 | 0.000165 | 0.000787216 |
| SHC4      | 15q21.1       | -0.19159 | 0.000165 | 0.000787216 |
| CPEB4     | 5q35.2        | 0.191589 | 0.000165 | 0.000787216 |
| PDS5A     | 4p14          | 0.191576 | 0.000165 | 0.000787858 |
| EPC2      | 2q23.1        | -0.19156 | 0.000165 | 0.000788719 |
| TNFAIP8L3 | 15q21.2       | -0.19153 | 0.000166 | 0.000790224 |
| FKBP9     | 7p14.3        | -0.19153 | 0.000166 | 0.000790224 |
| HAR1A     | 20q13.33      | 0.191511 | 0.000166 | 0.000791118 |
| WDR20     | 14q32.31      | 0.191509 | 0.000166 | 0.000791118 |
| VWA5A     | 11q24.2       | 0.191495 | 0.000166 | 0.000791831 |
| ALPK1     | 4q25          | 0.191426 | 0.000167 | 0.000796041 |
| FUT4      | 11q21         | 0.191396 | 0.000168 | 0.000797775 |
| CPS1      | 2q34          | 0.191381 | 0.000168 | 0.000798535 |
| KLHL23    | 2q31.1        | -0.19137 | 0.000168 | 0.000798899 |
| TEX45     | 19p13.2       | -0.19135 | 0.000168 | 0.000799895 |
| TP53BP1   | 15q15.3       | -0.19135 | 0.000168 | 0.000799898 |
| FGGY      | 1p32.1        | -0.19135 | 0.000168 | 0.000800026 |
| DENR      | 12q24.31      | -0.19134 | 0.000168 | 0.000800112 |
| WWC2-AS2  | 4q35.1        | -0.19133 | 0.000168 | 0.000800037 |
| GYS1      | 19q13.33      | 0.19132  | 0.000169 | 0.000801141 |
| SVBP      | 1p34.2        | -0.19126 | 0.000169 | 0.00080446  |
| CHRND     | 2q37.1        | -0.19126 | 0.000169 | 0.00080446  |
| HMGB1     | 13q12.3       | -0.19126 | 0.000169 | 0.00080446  |
| FAM178B   | 2q11.2        | -0.19125 | 0.00017  | 0.00080472  |
| IFITM3    | 11p15.5       | -0.19117 | 0.000171 | 0.00080981  |
| ZP2       | 16p12.3-p12.2 | -0.19116 | 0.000171 | 0.000810306 |
| HCG18     | 6p22.1        | -0.19109 | 0.000172 | 0.000814519 |
| SPINK5    | 5q32          | 0.191065 | 0.000172 | 0.000816005 |
| CARD6     | 5p13.1        | 0.191061 | 0.000172 | 0.000816005 |
| DNAJB2    | 2q35          | -0.19106 | 0.000172 | 0.000816005 |
| IGFBP7    | 4q12          | -0.19104 | 0.000172 | 0.000816968 |
| UCHL1     | 4p13          | -0.19104 | 0.000172 | 0.000816968 |
| OR10Q1    | 11q12.1       | 0.190991 | 0.000173 | 0.000819957 |
| GDF5      | 20q11.22      | -0.19095 | 0.000174 | 0.000822612 |
| SNX17     | 2p23.3        | -0.19094 | 0.000174 | 0.000822612 |

|              |          |          |          |             |
|--------------|----------|----------|----------|-------------|
| PSMD7        | 16q23.1  | -0.19093 | 0.000174 | 0.000823154 |
| NME7         | 1q24.2   | -0.19091 | 0.000174 | 0.000824775 |
| SMTN         | 22q12.2  | -0.19087 | 0.000175 | 0.000826896 |
| PAM16        | 16p13.3  | -0.19086 | 0.000175 | 0.000827213 |
| CPPED1       | 16p13.12 | -0.19084 | 0.000175 | 0.000828599 |
| GS1-124K5.11 | 7q11.21  | -0.19082 | 0.000176 | 0.000829759 |
| TIMM10       | 11q12.1  | -0.19079 | 0.000176 | 0.000831792 |
| ZNF235       | 19q13.31 | -0.19078 | 0.000176 | 0.000831882 |
| DCHS1        | 11p15.4  | -0.19077 | 0.000176 | 0.000832731 |
| AHSA2P       | 2p15     | -0.19073 | 0.000177 | 0.000834613 |
| PDZD11       | Xq13.1   | -0.19073 | 0.000177 | 0.000835005 |
| CES5A        | 16q12.2  | -0.1907  | 0.000177 | 0.000836244 |
| C8ORF82      | 8q24.3   | -0.19069 | 0.000177 | 0.000836695 |
| EIF2AK1      | 7p22.1   | -0.19067 | 0.000178 | 0.000838023 |
| CSDC2        | 22q13.2  | -0.19064 | 0.000178 | 0.000839815 |
| TREX1        | 3p21.31  | 0.19062  | 0.000178 | 0.000841048 |
| CLUH         | 17p13.3  | 0.190594 | 0.000179 | 0.000842629 |
| ATXN7L3      | 17q21.31 | -0.19059 | 0.000179 | 0.000842669 |
| IGFALS       | 16p13.3  | 0.190587 | 0.000179 | 0.000842669 |
| AATF         | 17q12    | -0.19058 | 0.000179 | 0.00084328  |
| LINC02731    | 11q25    | -0.19055 | 0.000179 | 0.000844452 |
| TNNT1        | 19q13.42 | 0.190547 | 0.000179 | 0.000844824 |
| SDF4         | 1p36.33  | 0.190541 | 0.000179 | 0.000845019 |
| SMARCA2      | 9p24.3   | 0.190532 | 0.00018  | 0.000845319 |
| YDJC         | 22q11.21 | -0.19053 | 0.00018  | 0.000845319 |
| LRMP         | 12p12.1  | 0.190472 | 0.00018  | 0.000849063 |
| SNRNP200     | 2q11.2   | -0.19039 | 0.000182 | 0.000854699 |
| TBC1D5       | 3p24.3   | -0.19035 | 0.000182 | 0.000856996 |
| NTF3         | 12p13.31 | 0.190334 | 0.000182 | 0.000857837 |
| EIF4EBP3     | 5q31.3   | -0.19033 | 0.000183 | 0.000858197 |
| MYO6         | 6q14.1   | 0.190313 | 0.000183 | 0.000858909 |
| ANO2         | 12p13.31 | 0.190216 | 0.000184 | 0.00086534  |
| PCP4L1       | 1q23.3   | -0.19019 | 0.000185 | 0.000866916 |
| PPP1R14C     | 6q25.1   | -0.19018 | 0.000185 | 0.000867096 |
| CRYBB3       | 22q11.23 | -0.19016 | 0.000185 | 0.000868862 |
| EPS15        | 1p32.3   | 0.190153 | 0.000185 | 0.000868862 |
| ABHD18       | 4q28.2   | 0.190123 | 0.000186 | 0.000870791 |
| PPP1R7       | 2q37.3   | -0.19011 | 0.000186 | 0.000871333 |
| RNF217-AS1   | 6q22.31  | -0.19011 | 0.000186 | 0.00087147  |
| TMEM17       | 2p15     | -0.19009 | 0.000186 | 0.000872614 |
| RBM6         | 3p21.31  | -0.19005 | 0.000187 | 0.00087497  |
| MXRA8        | 1p36.33  | -0.19001 | 0.000187 | 0.000877708 |
| KRT2         | 12q13.13 | 0.189966 | 0.000188 | 0.000880471 |
| STK31        | 7p15.3   | -0.18994 | 0.000188 | 0.000881784 |
| RNF8         | 6p21.2   | -0.18994 | 0.000188 | 0.00088217  |
| TECTA        | 11q23.3  | -0.18992 | 0.000189 | 0.000883421 |
| SNRPC        | 6p21.31  | -0.18988 | 0.000189 | 0.000885647 |
| SIX2         | 2p21     | -0.18985 | 0.00019  | 0.000887461 |
| C15ORF62     | 15q15.1  | -0.18984 | 0.00019  | 0.000887905 |
| MEX3D        | 19p13.3  | -0.1898  | 0.00019  | 0.000890787 |
| CDH9         | 5p14.1   | -0.18979 | 0.000191 | 0.000891322 |
| AGAP3        | 7q36.1   | -0.18978 | 0.000191 | 0.000891322 |
| PSMB3        | 17q12    | -0.18978 | 0.000191 | 0.000891322 |
| NARF         | 17q25.3  | -0.18977 | 0.000191 | 0.000891684 |
| SDF2         | 17q11.2  | -0.18977 | 0.000191 | 0.000891684 |
| NFYB         | 12q23.3  | -0.18976 | 0.000191 | 0.000891995 |
| TUBGCP2      | 10q26.3  | 0.189722 | 0.000192 | 0.000894767 |
| VBP1         | Xq28     | -0.18971 | 0.000192 | 0.000895538 |

|            |                |          |          |             |
|------------|----------------|----------|----------|-------------|
| MAP4K3     | 2p22.1         | -0.18963 | 0.000193 | 0.000900813 |
| ANKRD23    | 2q11.2         | -0.18961 | 0.000193 | 0.00090246  |
| DTX1       | 12q24.13       | 0.189593 | 0.000194 | 0.000903138 |
| HECTD2-AS1 | 10q23.32       | -0.18956 | 0.000194 | 0.000905302 |
| TMSB15A    | Xq22.1         | -0.18955 | 0.000194 | 0.00090608  |
| TMEM223    | 11q12.3        | -0.18953 | 0.000195 | 0.000907148 |
| CDADC1     | 13q14.2        | -0.1895  | 0.000195 | 0.000909249 |
| SCLT1      | 4q28.2         | 0.189459 | 0.000196 | 0.000911791 |
| BUD23      | 7q11.23        | -0.18945 | 0.000196 | 0.000911937 |
| CYP2D7     | 22q13.2        | -0.18944 | 0.000196 | 0.000912519 |
| DCAKD      | 17q21.31       | -0.18939 | 0.000197 | 0.000915977 |
| TMEM25     | 11q23.3        | -0.18936 | 0.000197 | 0.000917853 |
| ORAI3      | 16p11.2        | -0.18935 | 0.000197 | 0.000918668 |
| FBXL12     | 19p13.2        | -0.18926 | 0.000199 | 0.000925111 |
| LRRIQ3     | 1p31.1         | -0.18922 | 0.000199 | 0.000927975 |
| SAMD5      | 6q24.3         | 0.189196 | 0.0002   | 0.000929203 |
| LIG3       | 17q12          | -0.18919 | 0.0002   | 0.000929203 |
| METTL21A   | 2q33.3         | -0.18918 | 0.0002   | 0.000929947 |
| KIAA0586   | 14q23.1        | 0.189125 | 0.000201 | 0.00093388  |
| EIF3F      | 11p15.4        | -0.18912 | 0.000201 | 0.000934078 |
| TRIM6      | 11p15.4        | -0.18911 | 0.000201 | 0.000934307 |
| HASPIN     | 17p13.2        | 0.189108 | 0.000201 | 0.000934415 |
| TSPO       | 22q13.2        | 0.189106 | 0.000201 | 0.000934415 |
| RECK       | 9p13.3         | -0.1891  | 0.000201 | 0.00093474  |
| L3MBTL4    | 18p11.31       | -0.18909 | 0.000201 | 0.000935168 |
| METTL7A    | 12q13.12       | 0.189087 | 0.000201 | 0.000935168 |
| FAM50A     | Xq28           | -0.18905 | 0.000202 | 0.000937618 |
| TTLL4      | 2q35           | -0.18905 | 0.000202 | 0.000937624 |
| BET1P1     | 7q36.1         | -0.18897 | 0.000203 | 0.000943391 |
| KLK11      | 19q13.41       | 0.188945 | 0.000204 | 0.000944845 |
| ITFG2      | 12p13.33       | -0.18894 | 0.000204 | 0.000945315 |
| CYB5D1     | 17p13.1        | 0.188916 | 0.000204 | 0.000946611 |
| SFTPA2     | 10q22.3        | 0.188897 | 0.000205 | 0.000947755 |
| FOXS1      | 20q11.21       | -0.18888 | 0.000205 | 0.000949095 |
| WDR77      | 1p13.2         | -0.18886 | 0.000205 | 0.000950137 |
| WDR26      | 1q42.11-q42.12 | 0.188815 | 0.000206 | 0.00095327  |
| FAM135B    | 8q24.23        | 0.18881  | 0.000206 | 0.00095327  |
| NFAT5      | 16q22.1        | -0.18881 | 0.000206 | 0.00095327  |
| TWIST1     | 7p21.1         | -0.18877 | 0.000207 | 0.000955721 |
| BCL2L10    | 15q21.2        | -0.18877 | 0.000207 | 0.000955721 |
| PPFIA4     | 1q32.1         | -0.18876 | 0.000207 | 0.000956062 |
| MKI67      | 10q26.2        | 0.188756 | 0.000207 | 0.000956452 |
| SYDE1      | 19p13.12       | -0.1887  | 0.000208 | 0.00096013  |
| NME2       | 17q21.33       | -0.18869 | 0.000208 | 0.000960627 |
| AP1B1      | 22q12.2        | 0.188677 | 0.000208 | 0.00096173  |
| CRYGS      | 3q27.3         | -0.18867 | 0.000208 | 0.000962212 |
| ALKBH4     | 7q22.1         | -0.18865 | 0.000209 | 0.000963481 |
| SOCS5      | 2p21           | -0.18862 | 0.000209 | 0.000965786 |
| MANBA      | 4q24           | 0.18861  | 0.000209 | 0.000965958 |
| SULT1A2    | 16p11.2        | 0.188585 | 0.00021  | 0.000967626 |
| OLFML2A    | 9q33.3         | -0.18858 | 0.00021  | 0.000968095 |
| ZMYM2      | 13q12.11       | -0.1885  | 0.000211 | 0.000973782 |
| ADAM6      | 14q32.33       | 0.188496 | 0.000211 | 0.000973839 |
| ZNF205     | 16p13.3        | -0.18846 | 0.000212 | 0.000976317 |
| CYB561D2   | 3p21.31        | 0.188344 | 0.000214 | 0.000985107 |
| CHUK       | 10q24.31       | 0.18834  | 0.000214 | 0.000985165 |
| HBA2       | 16p13.3        | 0.188312 | 0.000214 | 0.000987133 |
| TLR5       | 1q41           | 0.188229 | 0.000216 | 0.000993362 |



|             |                 |          |          |             |
|-------------|-----------------|----------|----------|-------------|
| AFP         | 4q13.3          | -0.18822 | 0.000216 | 0.000994111 |
| ATAT1       | 6p21.33         | -0.18817 | 0.000217 | 0.000997797 |
| UQCRC2      | 16p12.2         | 0.188164 | 0.000217 | 0.000997797 |
| BCDIN3D-AS1 | 12q13.12        | -0.18814 | 0.000217 | 0.000999465 |
| CHAC2       | 2p16.2          | 0.188133 | 0.000217 | 0.0009996   |
| TCF3        | 19p13.3         | -0.18813 | 0.000217 | 0.0009996   |
| KANSL3      | 2q11.2          | -0.18812 | 0.000218 | 0.001000625 |
| IFITM5      | 11p15.5         | -0.18802 | 0.000219 | 0.001008274 |
| G6PC3       | 17q21.31        | -0.18794 | 0.000221 | 0.001014062 |
| AOC1        | 7q36.1          | 0.187939 | 0.000221 | 0.001014062 |
| ARHGEF37    | 5q32            | 0.187934 | 0.000221 | 0.001014207 |
| ETV3L       | 1q23.1          | 0.187849 | 0.000222 | 0.001020743 |
| ATG2B       | 14q32.2         | 0.187843 | 0.000222 | 0.001021002 |
| RASSF8      | 12p12.1         | -0.18784 | 0.000222 | 0.0010212   |
| AXIN1       | 16p13.3         | -0.18779 | 0.000223 | 0.001024727 |
| LSMEM1      | 7q31.1          | -0.18777 | 0.000224 | 0.001026141 |
| UPK2        | 11q23.3         | -0.18775 | 0.000224 | 0.001027908 |
| MPPED2      | 11p14.1         | -0.1877  | 0.000225 | 0.001031386 |
| KRT85       | 12q13.13        | -0.18768 | 0.000225 | 0.00103289  |
| BTBD2       | 19p13.3         | -0.18767 | 0.000225 | 0.001032967 |
| TRPM3       | 9q21.12-q21.13  | -0.18767 | 0.000225 | 0.001032967 |
| SLC22A1     | 6q25.3          | -0.18762 | 0.000226 | 0.001037013 |
| THUMPD2     | 2p22.1 2p22-p21 | -0.18758 | 0.000227 | 0.001039771 |
| ROM1        | 11q12.3         | -0.18757 | 0.000227 | 0.001039981 |
| PSMC2       | 7q22.1          | -0.18757 | 0.000227 | 0.001039981 |
| CRYM        | 16p12.2         | 0.18756  | 0.000227 | 0.001040905 |
| DDX50       | 10q22.1         | -0.18752 | 0.000228 | 0.001044177 |
| EHF         | 11p13           | 0.187509 | 0.000228 | 0.001044628 |
| HBEGF       | 5q31.3          | 0.187491 | 0.000229 | 0.001045874 |
| STUM        | 1q42.12         | -0.18746 | 0.000229 | 0.00104848  |
| PTPMT1      | 11p11.2         | -0.18743 | 0.00023  | 0.001050785 |
| NLE1        | 17q12           | -0.18742 | 0.00023  | 0.001051362 |
| ZNF654      | 3p11.1          | 0.187392 | 0.00023  | 0.001053061 |
| IGBP1       | Xq13.1          | -0.18737 | 0.000231 | 0.001054637 |
| NOL11       | 17q24.2         | -0.18736 | 0.000231 | 0.001055235 |
| KLF3-AS1    | 4p14            | -0.18735 | 0.000231 | 0.001056065 |
| LRRC4       | 7q32.1          | -0.18734 | 0.000231 | 0.001056538 |
| SERPINA3    | 14q32.13        | 0.187327 | 0.000231 | 0.001057226 |
| LYRM1       | 16p12.3         | -0.18732 | 0.000232 | 0.001057735 |
| DUS3L       | 19p13.3         | -0.1873  | 0.000232 | 0.001059104 |
| MSH4        | 1p31.1          | 0.187285 | 0.000232 | 0.001060024 |
| GASK1A      | 3p22.1          | -0.18727 | 0.000233 | 0.001060949 |
| GNGT1       | 7q21.3          | -0.18726 | 0.000233 | 0.001061438 |
| AQP5        | 12q13.12        | 0.187259 | 0.000233 | 0.001061438 |
| NFATC2      | 20q13.2         | -0.18725 | 0.000233 | 0.001061891 |
| SMIM4       | 3p21.1          | -0.18723 | 0.000233 | 0.001063696 |
| FHOD1       | 16q22.1         | 0.187219 | 0.000233 | 0.001064029 |
| GLB1L       | 2q35            | -0.1872  | 0.000234 | 0.001065333 |
| RND1        | 12q13.12        | 0.187187 | 0.000234 | 0.001066269 |
| TTC13       | 1q42.2          | 0.187164 | 0.000234 | 0.001067892 |
| HGS         | 17q25.3         | -0.18715 | 0.000235 | 0.001068597 |
| SFRP4       | 7p14.1          | -0.18715 | 0.000235 | 0.001068597 |
| ACTA2       | 10q23.31        | -0.18713 | 0.000235 | 0.001069888 |
| DAB2IP      | 9q33.2          | 0.187117 | 0.000235 | 0.001070685 |
| DBT         | 1p21.2          | 0.187117 | 0.000235 | 0.001070685 |
| CRELD2      | 22q13.33        | 0.187069 | 0.000236 | 0.001074425 |
| ST6GALNAC2  | 17q25.1         | 0.187051 | 0.000237 | 0.001075741 |
| KMT2E-AS1   | 7q22.3          | -0.18702 | 0.000237 | 0.001078423 |

|             |               |          |          |             |
|-------------|---------------|----------|----------|-------------|
| FRYL        | 4p11          | 0.18701  | 0.000237 | 0.001078687 |
| NEK10       | 3p24.1        | -0.187   | 0.000237 | 0.00107893  |
| SLC10A4     | 4p11          | -0.187   | 0.000237 | 0.00107893  |
| RNASEH1     | 2p25.3        | -0.18694 | 0.000239 | 0.001084136 |
| HYPM        | Xp11.4        | -0.18693 | 0.000239 | 0.001084483 |
| CD3G        | 11q23.3       | 0.186923 | 0.000239 | 0.001084812 |
| TAPT1-AS1   | 4p15.32       | -0.18692 | 0.000239 | 0.001084825 |
| TOP1P1      | 1q24.3        | -0.18691 | 0.000239 | 0.001085824 |
| ZNF93       | 19p12         | -0.18689 | 0.000239 | 0.001086512 |
| CCDC81      | 11q14.2       | -0.18688 | 0.00024  | 0.001087429 |
| PDLIM3      | 4q35.1        | -0.18686 | 0.00024  | 0.001088538 |
| FOXC2       | 16q24.1       | -0.18686 | 0.00024  | 0.001088538 |
| EPAS1       | 2p21          | 0.18685  | 0.00024  | 0.001089323 |
| SNRPE       | 1q32.1        | -0.18685 | 0.00024  | 0.001089352 |
| FBXO11      | 2p16.3        | -0.18684 | 0.000241 | 0.001089914 |
| RDH13       | 19q13.42      | 0.186805 | 0.000241 | 0.001092445 |
| RYBP        | 3p13          | 0.186792 | 0.000241 | 0.001093321 |
| SGPL1       | 10q22.1       | 0.186759 | 0.000242 | 0.001095896 |
| STAU2       | 8q21.11       | -0.18674 | 0.000242 | 0.001097311 |
| MN1         | 22q12.1       | -0.18671 | 0.000243 | 0.001099265 |
| ZNF660      | 3p21.31       | -0.18671 | 0.000243 | 0.001099513 |
| ADORA2A-AS1 | 22q11.23      | -0.18669 | 0.000243 | 0.001101098 |
| KCNK7       | 11q13.1       | 0.186669 | 0.000244 | 0.001102376 |
| TIMP3       | 22q12.3       | -0.18665 | 0.000244 | 0.001103729 |
| MALL        | 2q13          | 0.186646 | 0.000244 | 0.001103729 |
| GLRA2       | Xp22.2        | -0.18664 | 0.000244 | 0.001103729 |
| MYRF-AS1    | 11q12.2       | 0.186595 | 0.000245 | 0.001107749 |
| AP3B2       | 15q25.2       | -0.18657 | 0.000246 | 0.001109551 |
| SARDH       | 9q34.2        | -0.18655 | 0.000246 | 0.001110913 |
| CCDC160     | Xq26.2        | 0.186549 | 0.000246 | 0.001110913 |
| GABRR1      | 6q15          | -0.18655 | 0.000246 | 0.001110913 |
| PLEKHG1     | 6q25.1        | 0.186543 | 0.000246 | 0.001111068 |
| FOXJ2       | 12p13.31      | 0.186532 | 0.000246 | 0.001111715 |
| TRPA1       | 8q21.11       | 0.186489 | 0.000247 | 0.00111519  |
| NDN         | 15q11.2       | -0.18644 | 0.000248 | 0.001118908 |
| VAMP2       | 17p13.1       | 0.186438 | 0.000248 | 0.001119146 |
| COG2        | 1q42.2        | 0.186425 | 0.000248 | 0.001120024 |
| ASAH1       | 8p22          | 0.186385 | 0.000249 | 0.001123356 |
| VIPR1       | 3p22.1        | 0.186375 | 0.000249 | 0.001123972 |
| SOX11       | 2p25.2        | -0.18637 | 0.00025  | 0.00112426  |
| CRIP1       | 2p21          | -0.18635 | 0.00025  | 0.00112549  |
| FXD2        | 11q23.3       | -0.18627 | 0.000252 | 0.001132825 |
| SLC16A9     | 10q21.2       | 0.186258 | 0.000252 | 0.001133204 |
| ADIPOR1     | 1q32.1        | 0.186253 | 0.000252 | 0.001133425 |
| PKIG        | 20q13.12      | -0.18624 | 0.000252 | 0.001134542 |
| S100A6      | 1q21.3        | 0.186217 | 0.000253 | 0.001136119 |
| HSPB2       | 11q23.1       | -0.1862  | 0.000253 | 0.001137392 |
| TSPYL4      | 6q22.1        | -0.18614 | 0.000254 | 0.001142287 |
| ZFAND1      | 8q21.13       | -0.18607 | 0.000255 | 0.001148764 |
| DYRK4       | 12p13.32      | 0.186048 | 0.000256 | 0.001150081 |
| EHMT2       | 6p21.33       | -0.18605 | 0.000256 | 0.001150081 |
| SLC25A3     | 12q23.1       | 0.186024 | 0.000256 | 0.001151755 |
| SLC25A21    | 14q13.3       | 0.185986 | 0.000257 | 0.001154915 |
| FAM234B     | 12p13.1       | -0.18597 | 0.000257 | 0.001156267 |
| METTL26     | 16p13.3       | -0.18597 | 0.000258 | 0.001156267 |
| NME6        | 3p21.31       | -0.18589 | 0.000259 | 0.001162923 |
| CD96        | 3q13.13-q13.2 | 0.185883 | 0.000259 | 0.001163258 |
| TMEM91      | 19q13.2       | -0.18586 | 0.00026  | 0.001164696 |

|           |              |          |          |             |
|-----------|--------------|----------|----------|-------------|
| SPACA4    | 19q13.33     | 0.185836 | 0.00026  | 0.001166732 |
| WFDC12    | 20q13.12     | 0.185836 | 0.00026  | 0.001166732 |
| SRRM2-AS1 | 16p13.3      | 0.185832 | 0.00026  | 0.001166795 |
| DAGLB     | 7p22.1       | -0.18582 | 0.000261 | 0.001167916 |
| HRH1      | 3p25.3       | 0.185799 | 0.000261 | 0.0011693   |
| KDELR1    | 19q13.33     | 0.185793 | 0.000261 | 0.001169607 |
| RPL38     | 17q25.1      | -0.18578 | 0.000261 | 0.001170582 |
| GAMT      | 19p13.3      | -0.18577 | 0.000261 | 0.001171144 |
| KBTBD2    | 7p14.3       | -0.18574 | 0.000262 | 0.001173673 |
| RAMP2     | 17q21.2      | -0.18571 | 0.000263 | 0.001176354 |
| RPS15A    | 16p12.3      | -0.18566 | 0.000264 | 0.001180703 |
| SLC12A8   | 3q21.2       | 0.185612 | 0.000265 | 0.00118456  |
| KRIT1     | 7q21.2       | -0.1856  | 0.000265 | 0.001185559 |
| PKP1      | 1q32.1       | -0.1856  | 0.000265 | 0.001185559 |
| DNASE2B   | 1p31.1-p22.3 | 0.185564 | 0.000266 | 0.00118821  |
| PRR7      | 5q35.3       | -0.18551 | 0.000267 | 0.001192775 |
| COA1      | 7p13         | -0.1855  | 0.000267 | 0.001193747 |
| MCM3AP    | 21q22.3      | 0.185481 | 0.000267 | 0.001195121 |
| TMX1      | 14q22.1      | 0.185452 | 0.000268 | 0.001197577 |
| CLCN1     | 7q34         | 0.185438 | 0.000268 | 0.001198564 |
| PPME1     | 11q13.4      | -0.18543 | 0.000268 | 0.001199087 |
| GPR153    | 1p36.31      | -0.18542 | 0.000269 | 0.001199363 |
| PUM3      | 9p24.2       | -0.18542 | 0.000269 | 0.001199618 |
| MLEC      | 12q24.31     | 0.185414 | 0.000269 | 0.001199665 |
| SON       | 21q22.11     | 0.185412 | 0.000269 | 0.001199665 |
| DUS1L     | 17q25.3      | -0.18538 | 0.00027  | 0.001202126 |
| IGFBPL1   | 9p13.1       | -0.18538 | 0.00027  | 0.001202126 |
| KRT9      | 17q21.2      | 0.185291 | 0.000271 | 0.001210218 |
| SYP       | Xp11.23      | -0.18526 | 0.000272 | 0.001212553 |
| USP42     | 7p22.1       | -0.18522 | 0.000273 | 0.001216222 |
| MBOAT4    | 8p12         | 0.185192 | 0.000273 | 0.001218736 |
| SLC39A13  | 11p11.2      | -0.18514 | 0.000274 | 0.001222828 |
| NSUN5P2   | 7q11.23      | -0.18514 | 0.000275 | 0.001222828 |
| EPN3      | 17q21.33     | 0.185139 | 0.000275 | 0.001222903 |
| CNN1      | 19p13.2      | -0.18512 | 0.000275 | 0.001224185 |
| TKTL2     | 4q32.2       | 0.185113 | 0.000275 | 0.001224877 |
| PRMT9     | 4q31.23      | 0.185099 | 0.000275 | 0.001225839 |
| TK2       | 16q21        | 0.185096 | 0.000276 | 0.001225839 |
| ID4       | 6p22.3       | -0.18509 | 0.000276 | 0.001225839 |
| PRPF18    | 10p13        | 0.185053 | 0.000276 | 0.001229504 |
| APPL2     | 12q23.3      | 0.185045 | 0.000277 | 0.00122995  |
| JADE1     | 4q28.2       | 0.185035 | 0.000277 | 0.001230684 |
| PLXNA2    | 1q32.2       | 0.185019 | 0.000277 | 0.001231859 |
| NUP160    | 11p11.2      | -0.185   | 0.000278 | 0.001233285 |
| PCAT18    | 18q11.2      | 0.184988 | 0.000278 | 0.001233715 |
| ZNF677    | 19q13.42     | -0.18499 | 0.000278 | 0.001233715 |
| SNRPN     | 15q11.2      | -0.18499 | 0.000278 | 0.001233715 |
| TAF6L     | 11q12.3      | -0.18499 | 0.000278 | 0.001233715 |
| SLC24A2   | 9p22.1-p21.3 | -0.18495 | 0.000279 | 0.001237247 |
| IGF2BP2   | 3q27.2       | -0.18489 | 0.00028  | 0.00124186  |
| STMP1     | 7q33         | -0.18489 | 0.00028  | 0.00124186  |
| SLAMF6    | 1q23.2-q23.3 | 0.184887 | 0.00028  | 0.001242123 |
| STAG2     | Xq25         | -0.18486 | 0.000281 | 0.001244235 |
| GK5       | 3q23         | 0.18485  | 0.000281 | 0.001245122 |
| P3H2      | 3q28         | 0.184831 | 0.000281 | 0.001246634 |
| CTH       | 1p31.1       | 0.184823 | 0.000281 | 0.001247169 |
| CABCOC1   | 10q21.2      | -0.18479 | 0.000282 | 0.001249845 |
| DTD1      | 20p11.23     | -0.18479 | 0.000282 | 0.001250054 |

|                    |               |          |          |             |
|--------------------|---------------|----------|----------|-------------|
| LMLN               | 3q29          | 0.18478  | 0.000282 | 0.001250454 |
| ANXA2P1            | 4q31.3        | 0.184768 | 0.000283 | 0.00125142  |
| G6PD               | Xq28          | -0.18471 | 0.000284 | 0.001256455 |
| MRPL10             | 17q21.32      | -0.18469 | 0.000284 | 0.001258756 |
| CHRN2              | 1q21.3        | -0.18467 | 0.000285 | 0.001260425 |
| LCOR               | 10q24.1       | 0.184664 | 0.000285 | 0.001260425 |
| UBA3               | 3p14.1        | -0.18464 | 0.000285 | 0.001261908 |
| PTP4A2             | 1p35.2        | 0.184643 | 0.000285 | 0.001261908 |
| ONECUT2            | 18q21.31      | 0.184571 | 0.000287 | 0.001268629 |
| LENG9              | 19q13.42      | 0.184547 | 0.000287 | 0.001270718 |
| HYAL3              | 3p21.31       | -0.18451 | 0.000288 | 0.001274168 |
| PEX3               | 6q24.2        | -0.1845  | 0.000289 | 0.001275182 |
| ARFGAP2            | 11p11.2       | -0.18449 | 0.000289 | 0.001275186 |
| UHMK1              | 1q23.3        | 0.184459 | 0.000289 | 0.001278276 |
| PTGER4P2-CDK2AP2P2 | 9q13          | -0.18441 | 0.000291 | 0.001283271 |
| TFR2               | 7q22.1        | 0.184378 | 0.000291 | 0.001285715 |
| TEAD1              | 11p15.3       | -0.18435 | 0.000292 | 0.00128828  |
| ETFA               | 15q24.2-q24.3 | 0.184291 | 0.000293 | 0.001293576 |
| RXYLT1             | 12q14.2       | -0.18429 | 0.000293 | 0.001293576 |
| KPNA5              | 6q22.1        | -0.18425 | 0.000294 | 0.001296911 |
| PIFO               | 1p13.2        | -0.18425 | 0.000294 | 0.001297274 |
| OTOP3              | 17q25.1       | 0.184237 | 0.000294 | 0.001298088 |
| EFCAB10            | 7q22.3        | -0.18422 | 0.000295 | 0.001299943 |
| P2RY10             | Xq21.1        | 0.184187 | 0.000296 | 0.001302629 |
| FBXO41             | 2p13.2        | -0.18417 | 0.000296 | 0.001303949 |
| ACVRL1             | 12q13.13      | 0.184166 | 0.000296 | 0.001303949 |
| SLC25A4            | 4q35.1        | 0.184165 | 0.000296 | 0.001303949 |
| SHKBP1             | 19q13.2       | -0.18415 | 0.000296 | 0.00130466  |
| TMEM229A           | 7q31.32       | 0.184141 | 0.000297 | 0.001305774 |
| MTM1               | Xq28          | 0.184138 | 0.000297 | 0.001305778 |
| CA7                | 16q22.1       | 0.184135 | 0.000297 | 0.001305835 |
| TIAM1              | 21q22.11      | 0.184077 | 0.000298 | 0.001311425 |
| TMLHE              | Xq28          | -0.18406 | 0.000298 | 0.001312314 |
| EPYC               | 12q21.33      | -0.18405 | 0.000299 | 0.001314039 |
| PNMA8B             | 19q13.32      | -0.18403 | 0.000299 | 0.001315011 |
| AK5                | 1p31.1        | -0.18401 | 0.0003   | 0.00131676  |
| LAIR2              | 19q13.42      | 0.183983 | 0.0003   | 0.001319439 |
| RHPN1              | 8q24.3        | -0.18398 | 0.0003   | 0.001319594 |
| SUV39H1            | Xp11.23       | -0.18395 | 0.000301 | 0.001322091 |
| WHAMMP3            | 15q11.2       | -0.18393 | 0.000302 | 0.00132428  |
| FMNL2              | 2q23.3        | -0.18392 | 0.000302 | 0.001325137 |
| CDK11B             | 1p36.33       | 0.183907 | 0.000302 | 0.001325815 |
| RBFOX3             | 17q25.3       | -0.18388 | 0.000303 | 0.001328633 |
| EFEMP2             | 11q13.1       | -0.18383 | 0.000304 | 0.001333444 |
| TBCE               | 1q42.3        | -0.18381 | 0.000304 | 0.001334565 |
| STK3               | 8q22.2        | -0.18381 | 0.000304 | 0.001334565 |
| PTGDR2             | 11q12.2       | 0.18379  | 0.000305 | 0.001336322 |
| POLR1B             | 2q14.1        | -0.18378 | 0.000305 | 0.001336928 |
| SCEL               | 13q22.3       | 0.183774 | 0.000305 | 0.001337075 |
| SMAD6              | 15q22.31      | -0.18377 | 0.000305 | 0.001337075 |
| SALL2              | 14q11.2       | -0.18372 | 0.000307 | 0.00134258  |
| PSMD10             | Xq22.3        | -0.18372 | 0.000307 | 0.00134258  |
| ZMIZ1              | 10q22.3       | 0.183709 | 0.000307 | 0.001342933 |
| GOSR2              | 17q21.32      | -0.18369 | 0.000307 | 0.001344533 |
| NFIC               | 19p13.3       | 0.183674 | 0.000308 | 0.001346024 |
| KIF19              | 17q25.1       | 0.183649 | 0.000308 | 0.001348251 |
| FOPNL              | 16p13.11      | -0.18362 | 0.000309 | 0.001350645 |
| IRS2               | 13q34         | 0.183617 | 0.000309 | 0.001351067 |

|           |               |          |          |             |
|-----------|---------------|----------|----------|-------------|
| BPI       | 20q11.23      | -0.18359 | 0.000309 | 0.001353211 |
| FBXO34    | 14q22.3       | 0.18359  | 0.00031  | 0.001353211 |
| PTPRF     | 1p34.2        | 0.183573 | 0.00031  | 0.001354689 |
| UPRT      | Xq13.3        | -0.18356 | 0.00031  | 0.001355359 |
| DTYMK     | 2q37.3        | -0.18354 | 0.000311 | 0.001357289 |
| CRY2      | 11p11.2       | -0.18354 | 0.000311 | 0.001357578 |
| SLC6A3    | 5p15.33       | -0.18353 | 0.000311 | 0.001357969 |
| HYMAI     | 6q24.2        | -0.18341 | 0.000314 | 0.001370444 |
| PROM1     | 4p15.32       | 0.183388 | 0.000314 | 0.00137231  |
| TRIM3     | 11p15.4       | 0.183335 | 0.000316 | 0.001377657 |
| BCAT2     | 19q13.33      | 0.183315 | 0.000316 | 0.001379502 |
| ATP6V1B2  | 8p21.3        | 0.183295 | 0.000317 | 0.001381326 |
| TMED1     | 19p13.2       | -0.18328 | 0.000317 | 0.001383016 |
| REG1A     | 2p12          | 0.183162 | 0.00032  | 0.001394873 |
| PENK      | 8q12.1        | -0.18312 | 0.000321 | 0.001399234 |
| DGKI      | 7q33          | -0.18312 | 0.000321 | 0.001399234 |
| NKX3-2    | 4p15.33       | -0.18311 | 0.000321 | 0.001399347 |
| HDAC11    | 3p25.1        | -0.18307 | 0.000322 | 0.00140344  |
| SMOC1     | 14q24.2       | -0.18306 | 0.000322 | 0.001404504 |
| CD7       | 17q25.3       | 0.183039 | 0.000323 | 0.001406313 |
| PSMA2     | 7p14.1        | -0.18302 | 0.000323 | 0.001407791 |
| C5ORF34   | 5p12          | -0.18302 | 0.000323 | 0.001407791 |
| CNBP      | 3q21.3        | -0.18302 | 0.000323 | 0.001407791 |
| PLXDC1    | 17q12         | -0.18295 | 0.000325 | 0.001414808 |
| ZFP69B    | 1p34.2        | -0.18294 | 0.000325 | 0.001415599 |
| DOK1      | 2p13.1        | -0.18292 | 0.000326 | 0.001417629 |
| CEBPA     | 19q13.11      | -0.18291 | 0.000326 | 0.001417629 |
| ZNF567    | 19q13.12      | -0.1829  | 0.000326 | 0.001418655 |
| SYT14     | 1q32.2        | -0.18289 | 0.000327 | 0.001419985 |
| MCTS2P    | 20q11.21      | -0.18284 | 0.000328 | 0.001425318 |
| BCR       | 22q11.23      | 0.182806 | 0.000329 | 0.00142819  |
| RFNG      | 17q25.3       | -0.18277 | 0.00033  | 0.001431725 |
| ARMC6     | 19p13.11      | -0.18277 | 0.00033  | 0.001431725 |
| ESR2      | 14q23.2-q23.3 | 0.18276  | 0.00033  | 0.001432395 |
| ZNF232    | 17p13.2       | 0.18275  | 0.00033  | 0.001433185 |
| GPR171    | 3q25.1        | 0.18274  | 0.00033  | 0.001433933 |
| UTS2      | 1p36.23       | 0.182736 | 0.000331 | 0.001434057 |
| MAP9      | 4q32.1        | -0.18266 | 0.000332 | 0.001442191 |
| LINC01003 | 7q36.1        | -0.18263 | 0.000333 | 0.001444736 |
| ZNF767P   | 7q36.1        | -0.18262 | 0.000333 | 0.001445639 |
| COX4I2    | 20q11.21      | -0.18261 | 0.000334 | 0.001446359 |
| MCOLN1    | 19p13.2       | 0.182601 | 0.000334 | 0.001447422 |
| ADAM19    | 5q33.3        | -0.18259 | 0.000334 | 0.001447897 |
| ZSCAN32   | 16p13.3       | -0.18254 | 0.000336 | 0.001453516 |
| MIDN      | 19p13.3       | 0.182532 | 0.000336 | 0.001454184 |
| ZNF77     | 19p13.3       | -0.18251 | 0.000336 | 0.001456422 |
| PIAS1     | 15q23         | 0.182487 | 0.000337 | 0.001458524 |
| TSNAXIP1  | 16q22.1       | -0.1824  | 0.000339 | 0.001467657 |
| TNPO2     | 19p13.13      | -0.18239 | 0.000339 | 0.001468113 |
| ASB9      | Xp22.2        | -0.18239 | 0.000339 | 0.001468113 |
| SBK1      | 16p12.1       | -0.18237 | 0.00034  | 0.00146995  |
| MAGOH     | 1p32.3        | -0.18237 | 0.00034  | 0.001469996 |
| FIZ1      | 19q13.42      | -0.18236 | 0.00034  | 0.001470623 |
| SPINK2    | 4q12          | 0.182352 | 0.00034  | 0.001471501 |
| ARIH2     | 3p21.31       | -0.18234 | 0.000341 | 0.001472048 |
| MEIS3     | 19q13.32      | -0.18228 | 0.000342 | 0.001478483 |
| ATF6      | 1q23.3        | 0.182265 | 0.000343 | 0.001480284 |
| MCRS1     | 12q13.12      | -0.18226 | 0.000343 | 0.001480915 |

|          |             |          |          |             |
|----------|-------------|----------|----------|-------------|
| HCG11    | 6p22.2      | -0.18224 | 0.000343 | 0.001482059 |
| CDC73    | 1q31.2      | 0.18223  | 0.000344 | 0.001483301 |
| HEBP1    | 12p13.1     | -0.18221 | 0.000344 | 0.001484541 |
| UBASH3A  | 21q22.3     | 0.182214 | 0.000344 | 0.001484541 |
| GRAMD1B  | 11q24.1     | 0.182208 | 0.000344 | 0.001484882 |
| EMC10    | 19q13.33    | -0.18218 | 0.000345 | 0.001487277 |
| MTHFSD   | 16q24.1     | -0.18215 | 0.000346 | 0.001491073 |
| ATP6V1D  | 14q23.3     | 0.182138 | 0.000346 | 0.00149169  |
| GATA5    | 20q13.33    | -0.18214 | 0.000346 | 0.00149169  |
| LHPP     | 10q26.13    | 0.182097 | 0.000347 | 0.001495932 |
| RAB6A    | 11q13.4     | -0.18207 | 0.000348 | 0.001498738 |
| MSANTD2  | 11q24.2     | -0.18205 | 0.000348 | 0.001500177 |
| MCM7     | 7q22.1      | -0.18205 | 0.000348 | 0.001500263 |
| SMCR8    | 17p11.2     | 0.182007 | 0.00035  | 0.001504956 |
| SPIN1    | 9q22.1      | -0.182   | 0.00035  | 0.001505152 |
| WNT4     | 1p36.12     | 0.18199  | 0.00035  | 0.001506215 |
| TIMM21   | 18q22.3     | 0.181977 | 0.00035  | 0.001507427 |
| RAI1     | 17p11.2     | 0.181945 | 0.000351 | 0.001510799 |
| TP63     | 3q28        | 0.181914 | 0.000352 | 0.001514026 |
| ADAMTS16 | 5p15.32     | -0.18191 | 0.000352 | 0.00151446  |
| TESMIN   | 11q13.3     | -0.1819  | 0.000352 | 0.001515444 |
| TMEM74   | 8q23.1      | -0.18189 | 0.000353 | 0.001516198 |
| INSC     | 11p15.2     | 0.181779 | 0.000356 | 0.001528366 |
| MOV10L1  | 22q13.33    | -0.18173 | 0.000357 | 0.001533329 |
| SMYD2    | 1q32.3      | -0.18169 | 0.000358 | 0.001538585 |
| HSPB11   | 1p32.3      | -0.18167 | 0.000359 | 0.001540428 |
| NBPF15   | 1q21.1      | -0.18166 | 0.000359 | 0.001540653 |
| DCAF6    | 1q24.2      | 0.181659 | 0.000359 | 0.001540778 |
| RPL27A   | 11p15.4     | -0.18165 | 0.000359 | 0.001541004 |
| CPXM2    | 10q26.13    | -0.18161 | 0.00036  | 0.001546246 |
| MFHAS1   | 8p23.1      | 0.181587 | 0.000361 | 0.00154825  |
| SERINC3  | 20q13.12    | -0.18154 | 0.000362 | 0.001553923 |
| NAB2     | 12q13.3     | -0.18152 | 0.000363 | 0.001555171 |
| SLC2A1   | 1p34.2      | -0.1815  | 0.000363 | 0.001558028 |
| MYO1H    | 12q24.11    | -0.18149 | 0.000364 | 0.001558795 |
| IDH3A    | 15q25.1     | 0.181469 | 0.000364 | 0.001560531 |
| PTPN4    | 2q14.2      | -0.18143 | 0.000365 | 0.001565321 |
| PRKD1    | 14q12       | -0.18139 | 0.000366 | 0.001569636 |
| CAND1    | 12q14.3-q15 | 0.181378 | 0.000367 | 0.001570381 |
| ANK3     | 10q21.2     | 0.181363 | 0.000367 | 0.001571847 |
| RNASE7   | 14q11.2     | 0.181336 | 0.000368 | 0.001574573 |
| LGALS14  | 19q13.2     | -0.18133 | 0.000368 | 0.001574573 |
| RFX4     | 12q23.3     | 0.181324 | 0.000368 | 0.001575584 |
| PTTG1IP  | 21q22.3     | 0.181312 | 0.000369 | 0.00157664  |
| PER3     | 1p36.23     | 0.181284 | 0.000369 | 0.001579612 |
| TOP1P2   | 22q11.23    | -0.18128 | 0.000369 | 0.001579767 |
| SGSM1    | 22q11.23    | 0.181256 | 0.00037  | 0.001582355 |
| TARBP2   | 12q13.13    | -0.18123 | 0.000371 | 0.001585649 |
| DEXI     | 16p13.13    | -0.18122 | 0.000371 | 0.00158588  |
| GCSAML   | 1q44        | 0.181205 | 0.000372 | 0.001587517 |
| ADGRF4   | 6p12.3      | -0.18118 | 0.000372 | 0.001589988 |
| KIRREL3  | 11q24.2     | 0.181164 | 0.000373 | 0.001591834 |
| RBL1     | 20q11.23    | -0.18115 | 0.000373 | 0.001592669 |
| SPAG17   | 1p12        | -0.18113 | 0.000374 | 0.001595712 |
| GCA      | 2q24.2      | -0.18111 | 0.000374 | 0.001597602 |
| IL23R    | 1p31.3      | 0.181077 | 0.000375 | 0.001600985 |
| SDHB     | 1p36.13     | 0.181046 | 0.000376 | 0.001604465 |
| GPATCH1  | 19q13.11    | -0.18103 | 0.000377 | 0.001606276 |

|            |            |          |          |             |
|------------|------------|----------|----------|-------------|
| ARRB1      | 11q13.4    | 0.181013 | 0.000377 | 0.0016078   |
| HNRNPAB    | 5q35.3     | 0.181009 | 0.000377 | 0.001607905 |
| AGT        | 1q42.2     | -0.18099 | 0.000378 | 0.001609903 |
| APC2       | 19p13.3    | 0.180987 | 0.000378 | 0.001609903 |
| TOP3A      | 17p11.2    | 0.180964 | 0.000378 | 0.001612433 |
| OBP2A      | 9q34.3     | -0.18092 | 0.00038  | 0.001616978 |
| ZNF169     | 9q22.32    | 0.180914 | 0.00038  | 0.001617832 |
| IKZF1      | 7p12.2     | 0.1809   | 0.00038  | 0.001619222 |
| RPL10      | Xq28       | -0.18087 | 0.000381 | 0.001622428 |
| RFC3       | 13q13.2    | -0.18081 | 0.000383 | 0.001629336 |
| NSMAF      | 8q12.1     | -0.1808  | 0.000383 | 0.001629726 |
| EXTL2      | 1p21.2     | -0.1808  | 0.000383 | 0.001629726 |
| FUBP1      | 1p31.1     | 0.1808   | 0.000383 | 0.001629726 |
| FMR1NB     | Xq27.3-q28 | -0.1808  | 0.000383 | 0.001629726 |
| JRK        | 8q24.3     | -0.18075 | 0.000385 | 0.001635496 |
| SIRPG      | 20p13      | 0.180741 | 0.000385 | 0.001636109 |
| MRPL49     | 11q13.1    | -0.18073 | 0.000385 | 0.001637635 |
| DCAF11     | 14q12      | 0.18071  | 0.000386 | 0.001639213 |
| SNORD116-4 | 15q11.2    | -0.18069 | 0.000386 | 0.001640982 |
| ADH1A      | 4q23       | 0.18069  | 0.000386 | 0.001640982 |
| CDKN2A     | 9p21.3     | -0.18069 | 0.000386 | 0.001640982 |
| TUBB1      | 20q13.32   | -0.18065 | 0.000387 | 0.001644952 |
| CALM2      | 2p21       | 0.180596 | 0.000389 | 0.001651491 |
| DNAJC15    | 13q14.11   | -0.18059 | 0.000389 | 0.001651491 |
| DPT        | 1q24.2     | -0.18058 | 0.00039  | 0.001652678 |
| TEX14      | 17q22      | -0.18058 | 0.00039  | 0.001652678 |
| POLR3B     | 12q23.3    | 0.180577 | 0.00039  | 0.001652678 |
| UGCG       | 9q31.3     | 0.180561 | 0.00039  | 0.00165438  |
| MAT2B      | 5q34       | 0.18052  | 0.000391 | 0.001659165 |
| MINDY1     | 1q21.3     | 0.180508 | 0.000392 | 0.001660329 |
| FBXL19     | 16p11.2    | -0.18046 | 0.000393 | 0.001666218 |
| PFDN5      | 12q13.13   | -0.18045 | 0.000394 | 0.001666898 |
| HDAC7      | 12q13.11   | -0.18045 | 0.000394 | 0.001666898 |
| C7ORF31    | 7p15.3     | -0.18039 | 0.000395 | 0.001674282 |
| U2SURP     | 3q23       | -0.18038 | 0.000396 | 0.001675047 |
| CA1        | 8q21.2     | 0.180373 | 0.000396 | 0.001675249 |
| TNIP3      | 4q27       | 0.180335 | 0.000397 | 0.001679726 |
| TSSC2      | 11p15.4    | -0.18031 | 0.000398 | 0.001682135 |
| LINC01278  | Xq11.1     | -0.18031 | 0.000398 | 0.001682385 |
| CD151      | 11p15.5    | -0.18031 | 0.000398 | 0.001682385 |
| TMEM156    | 4p14       | 0.180295 | 0.000398 | 0.001683361 |
| ARMCX1     | Xq22.1     | -0.18028 | 0.000399 | 0.00168505  |
| MTRF1      | 13q14.11   | -0.18028 | 0.000399 | 0.00168505  |
| RNF38      | 9p13.2     | -0.18026 | 0.000399 | 0.001686342 |
| MGP        | 12p12.3    | -0.18024 | 0.0004   | 0.001689451 |
| METTL23    | 17q25.1    | -0.18021 | 0.000401 | 0.001691821 |
| POP7       | 7q22.1     | -0.18021 | 0.000401 | 0.001692511 |
| TBCK       | 4q24       | -0.18018 | 0.000401 | 0.001695299 |
| PRKCG      | 19q13.42   | 0.180172 | 0.000402 | 0.001696202 |
| ZNF746     | 7q36.1     | -0.18017 | 0.000402 | 0.001696655 |
| NDUFAF8    | 17q25.3    | -0.18012 | 0.000403 | 0.001702468 |
| MED27      | 9q34.13    | -0.18011 | 0.000404 | 0.001702636 |
| LPIN1      | 2p25.1     | 0.180099 | 0.000404 | 0.001704246 |
| HBA1       | 16p13.3    | 0.180084 | 0.000404 | 0.001705811 |
| ZNF510     | 9q22.33    | -0.18007 | 0.000405 | 0.001706748 |
| TRIM54     | 2p23.3     | -0.18003 | 0.000406 | 0.001711694 |
| ZNF528     | 19q13.41   | -0.18003 | 0.000406 | 0.001711759 |
| DCUN1D3    | 16p12.3    | -0.18002 | 0.000406 | 0.00171243  |

|             |               |          |          |             |
|-------------|---------------|----------|----------|-------------|
| HES2        | 1p36.31       | 0.180003 | 0.000407 | 0.001714523 |
| PPP1R9B     | 17q21.33      | -0.17998 | 0.000408 | 0.001717568 |
| IGLON5      | 19q13.41      | -0.17996 | 0.000408 | 0.001719961 |
| APEX2       | Xp11.21       | -0.17994 | 0.000409 | 0.00172107  |
| PLD2        | 17p13.2       | 0.179941 | 0.000409 | 0.00172107  |
| SELENOM     | 22q12.2       | -0.17994 | 0.000409 | 0.001721352 |
| NCOA3       | 20q13.12      | -0.17993 | 0.000409 | 0.001722279 |
|             | 1-Dec 9q33.1  | -0.1799  | 0.00041  | 0.001724726 |
| ZNF137P     | 19q13.41      | -0.17987 | 0.000411 | 0.001728486 |
| LRRC17      | 7q22.1        | -0.17987 | 0.000411 | 0.001728486 |
| OSTF1       | 9q21.13       | 0.179866 | 0.000411 | 0.001728714 |
| THAP12      | 11q13.5       | -0.17984 | 0.000412 | 0.001731838 |
| FUT10       | 8p12          | 0.179825 | 0.000412 | 0.001733249 |
| GCSH        | 16q23.2       | -0.17982 | 0.000413 | 0.001733618 |
| MLN         | 6p21.31       | 0.179779 | 0.000414 | 0.001738651 |
| CLPSL2      | 6p21.31       | -0.17971 | 0.000416 | 0.00174682  |
| HYAL4       | 7q31.32       | 0.179629 | 0.000419 | 0.001757682 |
| ATG9B       | 7q36.1        | -0.17962 | 0.000419 | 0.001757906 |
| TREX2       | Xq28          | -0.1796  | 0.00042  | 0.001760199 |
| PSD3        | 8p22          | 0.1796   | 0.00042  | 0.001760199 |
| ZNF713      | 7p11.2        | -0.1796  | 0.00042  | 0.001760199 |
| ARFGEF2     | 20q13.13      | -0.17959 | 0.00042  | 0.001760802 |
| ADRA2A      | 10q25.2       | 0.179572 | 0.00042  | 0.001763036 |
| HABP2       | 10q25.3       | 0.179551 | 0.000421 | 0.001765408 |
| ATP6AP1     | Xq28          | -0.17952 | 0.000422 | 0.001769406 |
| SLC16A7     | 12q14.1       | 0.179516 | 0.000422 | 0.001769406 |
| SYT3        | 19q13.33      | -0.1795  | 0.000423 | 0.00177104  |
| GALNT16     | 14q24.1       | -0.1795  | 0.000423 | 0.00177104  |
| CBLC        | 19q13.32      | 0.179479 | 0.000423 | 0.001773184 |
| FXVD7       | 19q13.12      | -0.17945 | 0.000424 | 0.001777056 |
| KIAA1210    | Xq24          | -0.17944 | 0.000425 | 0.001777472 |
| FUS         | 16p11.2       | -0.17941 | 0.000426 | 0.001780978 |
| OC90        | 8q24.22       | -0.17939 | 0.000426 | 0.001783233 |
| COMMD1      | 2p15          | -0.17936 | 0.000427 | 0.001786977 |
| N4BP2L2-IT2 | 13q13.1       | -0.17936 | 0.000427 | 0.001786977 |
| RGMB        | 5q15          | -0.17934 | 0.000428 | 0.001789184 |
| GOLGA5      | 14q32.12      | 0.179313 | 0.000429 | 0.001792526 |
| ULK4P2      | 15q13.2       | 0.179303 | 0.000429 | 0.001793414 |
| ANKRD40     | 17q21.33      | -0.17928 | 0.00043  | 0.001795995 |
| RAI2        | Xp22.13       | -0.17926 | 0.000431 | 0.001799057 |
| ABHD17B     | 9q21.13       | 0.179199 | 0.000432 | 0.001806421 |
| SPG11       | 15q21.1       | 0.179187 | 0.000433 | 0.001807656 |
| KIAA1614    | 1q25.3        | -0.17918 | 0.000433 | 0.001807747 |
| SPATA6      | 1p33          | 0.179123 | 0.000435 | 0.001815645 |
| GPX4        | 19p13.3       | -0.17911 | 0.000435 | 0.001817421 |
| AURKA       | 20q13.2       | -0.1791  | 0.000436 | 0.001817421 |
| SLC25A27    | 6p12.3        | -0.1791  | 0.000436 | 0.001817421 |
| PGBD4       | 15q14         | -0.17907 | 0.000437 | 0.001821849 |
| KLHL28      | 14q21.2       | 0.179064 | 0.000437 | 0.001821849 |
| PLEKHA7     | 11p15.2-p15.1 | 0.179061 | 0.000437 | 0.001821882 |
| SOX12       | 20p13         | -0.17902 | 0.000438 | 0.001826464 |
| C4ORF36     | 4q21.3        | 0.178998 | 0.000439 | 0.001829717 |
| CLSTN3      | 12p13.31      | -0.17899 | 0.000439 | 0.001830239 |
| GLDC        | 9p24.1        | -0.17899 | 0.000439 | 0.001830239 |
| AZIN1       | 8q22.3        | -0.17899 | 0.000439 | 0.001830239 |
| MORC2       | 22q12.2       | -0.17896 | 0.00044  | 0.001833296 |
| C1ORF52     | 1p22.3        | -0.17895 | 0.000441 | 0.001835082 |
| ISLR2       | 15q24.1       | -0.17894 | 0.000441 | 0.001835235 |



|            |              |          |          |             |
|------------|--------------|----------|----------|-------------|
| TMEM45B    | 11q24.3      | 0.178915 | 0.000442 | 0.001838339 |
| AKR1A1     | 1p34.1       | 0.178912 | 0.000442 | 0.001838339 |
| FBXL5      | 4p15.32      | 0.178911 | 0.000442 | 0.001838339 |
| ALDH16A1   | 19q13.33     | 0.178867 | 0.000443 | 0.001843798 |
| ZNF423     | 16q12.1      | -0.17887 | 0.000443 | 0.001843798 |
| DIO3       | 14q32.31     | -0.17886 | 0.000444 | 0.001844277 |
| BZW2       | 7p21.1       | -0.17884 | 0.000444 | 0.001846613 |
| RTP3       | 3p21.31      | -0.1788  | 0.000445 | 0.001850868 |
| DLL4       | 15q15.1      | -0.1788  | 0.000445 | 0.001850868 |
| POLG       | 15q26.1      | 0.17879  | 0.000446 | 0.001852459 |
| TEDC1      | 14q32.33     | 0.178763 | 0.000447 | 0.001855761 |
| CD68       | 17p13.1      | 0.178734 | 0.000448 | 0.001859459 |
| EMC2       | 8q23.1       | -0.17873 | 0.000448 | 0.001859705 |
| FAM163B    | 9q34.2       | -0.17872 | 0.000448 | 0.001860142 |
| CELF3      | 1q21.3       | -0.17872 | 0.000448 | 0.001860142 |
| NDUFS7     | 19p13.3      | 0.178708 | 0.000449 | 0.001861585 |
| SHLD1      | 20p12.3      | -0.1787  | 0.000449 | 0.001862102 |
| MKX        | 10p12.1      | -0.17868 | 0.00045  | 0.0018648   |
| SLC25A12   | 2q31.1       | -0.17866 | 0.00045  | 0.001866662 |
| GCC1       | 7q32.1       | -0.17866 | 0.00045  | 0.001866698 |
| WDYHV1     | 8q24.13      | -0.17865 | 0.000451 | 0.001867759 |
| GLCE       | 15q23        | -0.1786  | 0.000452 | 0.001874959 |
| PRKAG2     | 7q36.1       | 0.178591 | 0.000453 | 0.001875267 |
| ARHGAP19   | 10q24.1      | 0.178548 | 0.000454 | 0.001880882 |
| GGCT       | 7p14.3       | -0.17854 | 0.000454 | 0.001881132 |
| WASHC2C    | 10q11.22     | 0.178529 | 0.000455 | 0.001882779 |
| SHC3       | 9q22.1       | -0.17852 | 0.000455 | 0.00188413  |
| OXNAD1     | 3p25.1-p24.3 | 0.178472 | 0.000457 | 0.001890099 |
| TSTA3      | 8q24.3       | 0.178455 | 0.000457 | 0.00189215  |
| RIDA       | 8q22.2       | -0.17842 | 0.000458 | 0.001896252 |
| THEMIS     | 6q22.33      | 0.178383 | 0.00046  | 0.001901589 |
| PPTC7      | 12q24.11     | 0.178349 | 0.000461 | 0.001906003 |
| LDHAL6B    | 15q22.2      | 0.178346 | 0.000461 | 0.001906003 |
| FAM83D     | 20q11.23     | -0.17833 | 0.000462 | 0.001908336 |
| KRT8P41    | 11p15.4      | 0.17832  | 0.000462 | 0.001908988 |
| TNFRSF1A   | 12p13.31     | 0.178283 | 0.000463 | 0.001913895 |
| FXD3       | 19q13.12     | 0.178258 | 0.000464 | 0.001917052 |
| KRTAP2-1   | 17q21.2      | -0.17825 | 0.000464 | 0.001918162 |
| AGPAT4-IT1 | 6q26         | 0.178223 | 0.000465 | 0.001921305 |
| CCDC47     | 17q23.3      | 0.178204 | 0.000466 | 0.001923664 |
| NKX2-2     | 20p11.22     | 0.178173 | 0.000467 | 0.001927401 |
| AKAP12     | 6q25.1       | -0.17817 | 0.000467 | 0.001927401 |
| MSRB1      | 16p13.3      | -0.17812 | 0.000469 | 0.001934719 |
| LIN54      | 4q21.22      | 0.178108 | 0.000469 | 0.00193591  |
| CSTB       | 21q22.3      | 0.17805  | 0.000471 | 0.001943915 |
| TENT4B     | 16q12.1      | -0.17801 | 0.000473 | 0.001949194 |
| DDB2       | 11p11.2      | 0.178008 | 0.000473 | 0.001949194 |
| TGM2       | 20q11.23     | -0.178   | 0.000473 | 0.001950268 |
| DPP4       | 2q24.2       | 0.177928 | 0.000476 | 0.001960125 |
| ITSN1      | 21q22.11     | 0.177922 | 0.000476 | 0.001960557 |
| CMTM4      | 16q21-q22.1  | 0.177917 | 0.000476 | 0.001961022 |
| DNAJB14    | 4q23         | 0.177849 | 0.000478 | 0.001970549 |
| TNS3       | 7p12.3       | -0.17784 | 0.000479 | 0.001971823 |
| LIN37      | 19q13.12     | -0.17783 | 0.000479 | 0.001972498 |
| RCHY1      | 4q21.1       | 0.177814 | 0.00048  | 0.001974536 |
| NKIRAS2    | 17q21.2      | -0.17776 | 0.000482 | 0.001982433 |
| RCBTB1     | 13q14.2      | -0.17775 | 0.000482 | 0.001982441 |
| RPLP2      | 11p15.5      | -0.17764 | 0.000486 | 0.001999376 |

|           |                 |          |          |             |
|-----------|-----------------|----------|----------|-------------|
| ARF1      | 1q42.13         | 0.177633 | 0.000486 | 0.001999704 |
| S100A5    | 1q21.3          | 0.177609 | 0.000487 | 0.00200293  |
| SUSD5     | 3p22.3          | -0.17761 | 0.000487 | 0.00200293  |
| LGALS1    | 22q13.1         | -0.17759 | 0.000488 | 0.002005452 |
| CFAP126   | 1q23.3          | 0.177575 | 0.000488 | 0.002006775 |
| ZNF473    | 19q13.33        | -0.17755 | 0.000489 | 0.002010369 |
| FNDC11    | 20q13.33        | -0.17754 | 0.000489 | 0.002010501 |
| LYZL4     | 3p22.1          | 0.177516 | 0.000491 | 0.002014355 |
| LCAT      | 16q22.1         | -0.17747 | 0.000492 | 0.002021201 |
| TEX101    | 19q13.31        | 0.177451 | 0.000493 | 0.002023225 |
| OSR2      | 8q22.2          | 0.177433 | 0.000494 | 0.002025537 |
| S100A10   | 1q21.3          | 0.177422 | 0.000494 | 0.002026846 |
| FAR2      | 12p11.22        | 0.177402 | 0.000495 | 0.002029457 |
| RPLP0P2   | 11q12.2         | -0.17739 | 0.000495 | 0.002030425 |
| SLC2A14   | 12p13.31        | -0.17739 | 0.000495 | 0.002030425 |
| PIGN      | 18q21.33        | 0.177387 | 0.000495 | 0.002030425 |
| GTF2H5    | 6q25.3          | -0.17737 | 0.000496 | 0.002032194 |
| TRAPPC12  | 2p25.3          | -0.17731 | 0.000498 | 0.002040925 |
| SLC27A3   | 1q21.3          | 0.177296 | 0.000499 | 0.002043062 |
| IFI27L1   | 14q32.12        | 0.177285 | 0.000499 | 0.002043644 |
| PNMA6A    | Xq28            | -0.17728 | 0.000499 | 0.002043644 |
| CYP4F12   | 19p13.12        | 0.177284 | 0.000499 | 0.002043644 |
| CLNK      | 4p16.1          | 0.177279 | 0.000499 | 0.002043898 |
| MRPS27    | 5q13.2          | 0.177236 | 0.000501 | 0.002050094 |
| ZNF260    | 19q13.12        | -0.17722 | 0.000502 | 0.002052437 |
| CCDC170   | 6q25.1          | -0.17717 | 0.000503 | 0.002059375 |
| NECTIN2   | 19q13.32        | 0.177167 | 0.000503 | 0.002059375 |
| HEPH      | Xq12            | 0.177145 | 0.000504 | 0.002062232 |
| SMIM30    | 7q31.1          | -0.17714 | 0.000504 | 0.002062232 |
| GFM2      | 5q13.3          | 0.177074 | 0.000507 | 0.002072377 |
| OR10A4    | 11p15.4         | -0.17706 | 0.000508 | 0.002074814 |
| ADPRH     | 3q13.33         | -0.17704 | 0.000508 | 0.002077114 |
| INTS8     | 8q22.1          | -0.17703 | 0.000509 | 0.002077688 |
| ZDHHC19   | 3q29            | -0.17703 | 0.000509 | 0.002078047 |
| TNS4      | 17q21.2         | 0.176999 | 0.00051  | 0.002081836 |
| MRPS35    | 12p11.22        | 0.176988 | 0.00051  | 0.002083212 |
| RAD54B    | 8q22.1          | -0.17698 | 0.00051  | 0.002083421 |
| KSR2      | 12q24.22-q24.23 | 0.176965 | 0.000511 | 0.002085967 |
| PFDN6     | 6p21.32         | -0.17692 | 0.000513 | 0.002091704 |
| WASH7P    | 1p36.33         | -0.17692 | 0.000513 | 0.002091704 |
| FCRL4     | 1q23.1          | 0.176878 | 0.000514 | 0.002098155 |
| OVOL2     | 20p11.23        | 0.176841 | 0.000516 | 0.002103539 |
| TMEM234   | 1p35.2          | -0.17683 | 0.000516 | 0.0021054   |
| TRIM13    | 13q14.2         | -0.17681 | 0.000517 | 0.002107744 |
| RNF215    | 22q12.2         | -0.17681 | 0.000517 | 0.002107744 |
| ZNF595    | 4p16.3          | -0.17679 | 0.000518 | 0.002108886 |
| MAP4K1    | 19q13.2         | 0.176791 | 0.000518 | 0.002108886 |
| LINC01011 | 6p25.2          | 0.17679  | 0.000518 | 0.002108886 |
| ISLR      | 15q24.1         | -0.17677 | 0.000518 | 0.00211092  |
| FILIP1L   | 3q12.1          | -0.17677 | 0.000519 | 0.002111301 |
| ZCCHC17   | 1p35.2          | -0.17675 | 0.000519 | 0.002113879 |
| MYADML2   | 17q25.3         | -0.17673 | 0.00052  | 0.002115886 |
| SLC2A10   | 20q13.12        | 0.17672  | 0.00052  | 0.002117756 |
| ZSCAN9    | 6p22.1          | -0.17671 | 0.000521 | 0.00211946  |
| GABPB2    | 1q21.3          | 0.176679 | 0.000522 | 0.002123245 |
| RGP1      | 9p13.3          | 0.176677 | 0.000522 | 0.002123245 |
| GZMA      | 5q11.2          | 0.176672 | 0.000522 | 0.002123594 |
| NLRC5     | 16q13           | 0.176661 | 0.000523 | 0.002124861 |

|          |               |          |          |             |
|----------|---------------|----------|----------|-------------|
| BMT2     | 7q31.1        | -0.17663 | 0.000524 | 0.002129493 |
| PDCL3P4  | 3q12.3        | -0.17662 | 0.000524 | 0.002129493 |
| PMS2P2   | 7q11.23       | -0.17662 | 0.000524 | 0.002129493 |
| SLC22A18 | 11p15.4       | 0.176621 | 0.000524 | 0.002129493 |
| NCL      | 2q37.1        | -0.17661 | 0.000525 | 0.002130661 |
| MEIS1    | 2p14          | -0.17661 | 0.000525 | 0.002130705 |
| CAPS2    | 12q21.1-q21.2 | -0.1766  | 0.000525 | 0.002131156 |
| MRPS26   | 20p13         | -0.1766  | 0.000525 | 0.002131783 |
| MAGEA4   | Xq28          | -0.17657 | 0.000526 | 0.002135095 |
| CD177    | 19q13.31      | 0.176551 | 0.000527 | 0.002137943 |
| CAPZA1   | 1p13.2        | 0.176535 | 0.000528 | 0.00213988  |
| PLAGL1   | 6q24.2        | -0.17653 | 0.000528 | 0.00213988  |
| BMF      | 15q15.1       | -0.17652 | 0.000528 | 0.002141703 |
| PPIP5K1  | 15q15.3       | 0.176495 | 0.000529 | 0.002145207 |
| JPH3     | 16q24.2       | -0.17647 | 0.00053  | 0.002148591 |
| TMC4     | 19q13.42      | 0.176459 | 0.000531 | 0.002150008 |
| CXXC5    | 5q31.2        | -0.17646 | 0.000531 | 0.002150008 |
| TMEM130  | 7q22.1        | -0.17643 | 0.000532 | 0.002153108 |
| UQCRC1   | 3p21.31       | 0.176387 | 0.000533 | 0.002160146 |
| ZNF534   | 19q13.41      | -0.17637 | 0.000534 | 0.002161775 |
| CNOT6    | 5q35.3        | 0.176311 | 0.000536 | 0.002171275 |
| OVOL1    | 11q13.1       | -0.17631 | 0.000537 | 0.002171275 |
| FAM126B  | 2q33.1        | 0.176303 | 0.000537 | 0.002171875 |
| CD164    | 6q21          | 0.176277 | 0.000538 | 0.002175702 |
| ARHGEF33 | 2p22.1        | -0.17626 | 0.000538 | 0.002177334 |
| MS4A1    | 11q12.2       | 0.176259 | 0.000539 | 0.002177663 |
| ANKDD1A  | 15q22.31      | -0.17625 | 0.000539 | 0.002178446 |
| CMYA5    | 5q14.1        | -0.17624 | 0.000539 | 0.002178828 |
| LMAN1    | 18q21.32      | 0.176243 | 0.000539 | 0.002178828 |
| NSUN6    | 10p12.31      | -0.17624 | 0.000539 | 0.002178828 |
| MIR100HG | 11q24.1       | -0.17623 | 0.00054  | 0.002179954 |
| ACBD6    | 1q25.2-q25.3  | -0.17623 | 0.00054  | 0.002180453 |
| LMBRD2   | 5p13.2        | 0.176213 | 0.00054  | 0.002181305 |
| PPIC     | 5q23.2        | 0.176212 | 0.00054  | 0.002181305 |
| DUBR     | 3q13.12       | -0.17621 | 0.00054  | 0.002181305 |
| MAZ      | 16p11.2       | -0.1762  | 0.000541 | 0.002182556 |
| RECQL4   | 8q24.3        | -0.17619 | 0.000541 | 0.002184152 |
| CRTAM    | 11q24.1       | 0.176187 | 0.000541 | 0.002184152 |
| IFNGR1   | 6q23.3        | 0.176145 | 0.000543 | 0.002190473 |
| SMC2     | 9q31.1        | 0.176074 | 0.000546 | 0.002201476 |
| SLC6A1   | 3p25.3        | -0.17604 | 0.000547 | 0.00220633  |
| PTPRT    | 20q12-q13.11  | -0.17599 | 0.000549 | 0.002214186 |
| ARSE     | Xp22.33       | -0.17596 | 0.00055  | 0.00221779  |
| CARF     | 2q33.2        | -0.17596 | 0.00055  | 0.00221779  |
| APOBEC3C | 22q13.1       | -0.17594 | 0.000551 | 0.002221267 |
| SQLE     | 8q24.13       | -0.17593 | 0.000552 | 0.002221987 |
| HS3ST1   | 4p15.33       | 0.175901 | 0.000553 | 0.002226817 |
| MORN3    | 12q24.31      | -0.17587 | 0.000554 | 0.002231244 |
| MAGED4   | Xp11.22       | -0.17587 | 0.000554 | 0.002231244 |
| PLPP3    | 1p32.2        | -0.1758  | 0.000557 | 0.00224165  |
| ESD      | 13q14.2       | -0.17578 | 0.000558 | 0.00224484  |
| FIBP     | 11q13.1       | -0.17574 | 0.00056  | 0.002251362 |
| CIITA    | 16p13.13      | 0.175722 | 0.00056  | 0.00225374  |
| LCA5     | 6q14.1        | -0.17569 | 0.000562 | 0.002258956 |
| POLR3GL  | 1q21.1        | 0.175655 | 0.000563 | 0.002263897 |
| SDK2     | 17q25.1       | 0.175637 | 0.000564 | 0.00226654  |
| MBTD1    | 17q21.33      | -0.17561 | 0.000565 | 0.002270303 |
| NPY6R    | 5q31.2        | 0.175574 | 0.000567 | 0.002276194 |

|         |                 |          |          |             |
|---------|-----------------|----------|----------|-------------|
| TBRG4   | 7p13            | -0.17555 | 0.000568 | 0.002280348 |
| MOCS1   | 6p21.2          | -0.17552 | 0.000569 | 0.002283588 |
| LRRC75B | 22q11.23        | -0.17549 | 0.00057  | 0.002289776 |
| DLX5    | 7q21.3          | -0.17548 | 0.00057  | 0.002289817 |
| ALDOA   | 16p11.2         | 0.175459 | 0.000571 | 0.002293264 |
| VOPP1   | 7p11.2          | -0.17542 | 0.000573 | 0.002299149 |
| PPM1F   | 22q11.22        | -0.17537 | 0.000575 | 0.002306878 |
| CPSF7   | 11q12.2         | -0.17535 | 0.000576 | 0.002310961 |
| TRABD   | 22q13.33        | 0.175311 | 0.000578 | 0.00231652  |
| BRIX1   | 5p13.2          | -0.17528 | 0.000579 | 0.002320655 |
| POLR1C  | 6p21.1          | -0.17527 | 0.000579 | 0.002322916 |
| EPG5    | 18q12.3-q21.1   | 0.175245 | 0.000581 | 0.002326545 |
| MTCH2   | 11p11.2         | -0.17524 | 0.000581 | 0.002326898 |
| CD63    | 12q13.2         | 0.175235 | 0.000581 | 0.002326898 |
| EFHC2   | Xp11.3          | 0.175235 | 0.000581 | 0.002326898 |
| ZNF665  | 19q13.42        | -0.17521 | 0.000582 | 0.002329808 |
| FCER2   | 19p13.2         | 0.175189 | 0.000583 | 0.00233373  |
| TTC38   | 22q13.31        | 0.175163 | 0.000584 | 0.00233784  |
| CLEC2L  | 7q34            | -0.17514 | 0.000585 | 0.002341687 |
| FGL1    | 8p22            | 0.17513  | 0.000585 | 0.002342536 |
| ATAD3C  | 1p36.33         | -0.17512 | 0.000586 | 0.002343041 |
| KCNG3   | 2p21            | 0.175115 | 0.000586 | 0.002344274 |
| SATB2   | 2q33.1          | -0.17511 | 0.000586 | 0.002344316 |
| BBS7    | 4q27            | 0.175105 | 0.000587 | 0.00234502  |
| TBC1D1  | 4p14            | 0.175098 | 0.000587 | 0.002345704 |
| ZFP36   | 19q13.2         | 0.175086 | 0.000587 | 0.002347394 |
| IGF1R   | 15q26.3         | -0.17502 | 0.00059  | 0.002358176 |
| EGF     | 4q25            | 0.175018 | 0.00059  | 0.002358176 |
| NXF2    | Xq22.1          | -0.17499 | 0.000592 | 0.002362997 |
| BFSP1   | 20p12.1         | -0.17498 | 0.000592 | 0.002363655 |
| SESN2   | 1p35.3          | 0.174974 | 0.000592 | 0.002364382 |
| RBM4B   | 11q13.2         | -0.17496 | 0.000593 | 0.002366121 |
| ZNF549  | 19q13.43        | -0.17495 | 0.000593 | 0.002367374 |
| PRPF8   | 17p13.3         | 0.174902 | 0.000595 | 0.002375615 |
| RPUSD1  | 16p13.3         | -0.17489 | 0.000596 | 0.002376873 |
| CD40LG  | Xq26.3          | 0.174848 | 0.000598 | 0.002383553 |
| CD79A   | 19q13.2         | 0.174847 | 0.000598 | 0.002383553 |
| PPP2R2D | 10q26.3         | 0.174845 | 0.000598 | 0.002383553 |
| ACR     | 22q13.33        | -0.17483 | 0.000599 | 0.002386006 |
| HEYL    | 1p34.2          | -0.17482 | 0.000599 | 0.002387172 |
| CENPJ   | 13q12.12-q12.13 | -0.17477 | 0.000601 | 0.002394643 |
| GRM8    | 7q31.33         | -0.17476 | 0.000601 | 0.002395839 |
| NEB     | 2q23.3          | -0.17475 | 0.000602 | 0.002398392 |
| DRG1    | 22q12.2         | -0.17469 | 0.000604 | 0.002407265 |
| SCN4A   | 17q23.3         | -0.17469 | 0.000605 | 0.002407493 |
| GUCY1B1 | 4q32.1          | -0.1746  | 0.000609 | 0.00242242  |
| LHFPL6  | 13q13.3-q14.11  | -0.17456 | 0.00061  | 0.00242957  |
| BHLHE40 | 3p26.1          | 0.174555 | 0.000611 | 0.002430201 |
| HIGD1A  | 3p22.1          | 0.174539 | 0.000611 | 0.00243204  |
| NDUFS4  | 5q11.2          | 0.174539 | 0.000611 | 0.00243204  |
| NEUROD2 | 17q12           | 0.174512 | 0.000613 | 0.002436422 |
| RANBP6  | 9p24.1          | -0.17449 | 0.000614 | 0.002440081 |
| CAND2   | 3p25.2          | -0.17445 | 0.000615 | 0.002446467 |
| POU6F2  | 7p14.1          | -0.17444 | 0.000616 | 0.002447686 |
| PHF10   | 6q27            | -0.17444 | 0.000616 | 0.002447699 |
| KRT34   | 17q21.2         | -0.17442 | 0.000617 | 0.002450775 |
| PLAAT4  | 11q12.3         | 0.174404 | 0.000618 | 0.002452803 |
| IL1B    | 2q14.1          | 0.174363 | 0.000619 | 0.002459724 |

|              |                 |          |          |             |
|--------------|-----------------|----------|----------|-------------|
| POLI         | 18q21.2         | -0.17432 | 0.000621 | 0.002466664 |
| GPRASP2      | Xq22.1          | -0.17432 | 0.000621 | 0.002467031 |
| ATP5PB       | 1p13.2          | 0.174303 | 0.000622 | 0.002469075 |
| LY9          | 1q23.3          | 0.174276 | 0.000623 | 0.002473498 |
| HSPB3        | 5q11.2          | -0.17426 | 0.000624 | 0.00247509  |
| CLU          | 8p21.1          | -0.17426 | 0.000624 | 0.002475761 |
| MFGE8        | 15q26.1         | -0.17423 | 0.000625 | 0.002480431 |
| DUSP11       | 2p13.1          | -0.17417 | 0.000628 | 0.002490291 |
| TBC1D32      | 6q22.31         | -0.17415 | 0.000629 | 0.002494279 |
| SLC4A3       | 2q35            | -0.17413 | 0.00063  | 0.002497759 |
| FXR2         | 17p13.1         | 0.174112 | 0.000631 | 0.002499867 |
| C9ORF24      | 9p13.3          | 0.174105 | 0.000631 | 0.002500741 |
| TAS2R5       | 7q34            | -0.17409 | 0.000632 | 0.002503108 |
| ZNF347       | 19q13.42        | -0.17407 | 0.000633 | 0.002506668 |
| HYDIN        | 16q22.2         | -0.17406 | 0.000633 | 0.002508126 |
| KXD1         | 19p13.11        | -0.17403 | 0.000635 | 0.002512244 |
| BEND4        | 4p13            | 0.174024 | 0.000635 | 0.002512417 |
| ITK          | 5q33.3          | 0.174023 | 0.000635 | 0.002512417 |
| FADS2        | 11q12.2         | -0.17402 | 0.000635 | 0.002512417 |
| MOSPD3       | 7q22.1          | -0.17402 | 0.000635 | 0.002513069 |
| EEF1A2       | 20q13.33        | -0.17399 | 0.000637 | 0.002517234 |
| SLC17A4      | 6p22.2          | 0.173988 | 0.000637 | 0.002517234 |
| LCMT1        | 16p12.1         | -0.17398 | 0.000637 | 0.002518954 |
| PHF11        | 13q14.2         | -0.17397 | 0.000637 | 0.00251933  |
| EMG1         | 12p13.31        | -0.17392 | 0.00064  | 0.002528295 |
| DMRTC1B      | Xq13.1          | -0.17387 | 0.000642 | 0.002537343 |
| ESCO1        | 18q11.2         | 0.173823 | 0.000644 | 0.002545351 |
| TFCP2        | 12q13.12-q13.13 | -0.17374 | 0.000648 | 0.002559472 |
| WDR41        | 5q13.3-q14.1    | 0.173726 | 0.000649 | 0.002562393 |
| DEPDC1       | 1p31.3          | 0.173702 | 0.00065  | 0.002566326 |
| WDR5         | 9q34.2          | -0.1737  | 0.00065  | 0.002566466 |
| ABHD10       | 3q13.2          | 0.173679 | 0.000651 | 0.002569373 |
| SH3BP2       | 4p16.3          | 0.173678 | 0.000651 | 0.002569373 |
| NPIPA1       | 16p13.11        | -0.17367 | 0.000652 | 0.00257012  |
| NOSIP        | 19q13.33        | -0.17366 | 0.000652 | 0.00257111  |
| ZNF480       | 19q13.41        | -0.17365 | 0.000652 | 0.002572464 |
| ZNF506       | 19p13.11        | -0.17359 | 0.000655 | 0.00258339  |
| ILRUN        | 6p21.31         | 0.173568 | 0.000656 | 0.002587556 |
| GUCA2B       | 1p34.2          | 0.173524 | 0.000659 | 0.002595373 |
| TMEM65       | 8q24.13         | -0.17351 | 0.000659 | 0.002597826 |
| LOC100126784 | 11p15.1         | -0.17348 | 0.000661 | 0.002601859 |
| SMIM10L2A    | Xq26.3          | -0.17348 | 0.000661 | 0.002602133 |
| RFTN2        | 2q33.1          | -0.17347 | 0.000661 | 0.002603708 |
| C5ORF22      | 5p13.3          | 0.173466 | 0.000661 | 0.002603832 |
| TCEAL7       | Xq22.2          | -0.17345 | 0.000662 | 0.00260598  |
| MUC21        | 6p21.33         | -0.17345 | 0.000662 | 0.002606258 |
| CHRAC1       | 8q24.3          | -0.17341 | 0.000664 | 0.002613565 |
| NGF          | 1p13.2          | -0.17338 | 0.000666 | 0.00261838  |
| FCRL3        | 1q23.1          | 0.173373 | 0.000666 | 0.002619058 |
| CYB5B        | 16q22.1         | -0.17336 | 0.000667 | 0.002620552 |
| DLG4         | 17p13.1         | -0.17336 | 0.000667 | 0.002620552 |
| RNF212       | 4p16.3          | -0.17333 | 0.000668 | 0.002625928 |
| SCFD1        | 14q12           | 0.173314 | 0.000669 | 0.002628259 |
| GPR161       | 1q24.2          | -0.17328 | 0.000671 | 0.002635115 |
| TNFRSF14     | 1p36.32         | 0.17322  | 0.000673 | 0.002645228 |
| ACSS2        | 20q11.22        | 0.173211 | 0.000674 | 0.002646412 |
| CLEC11A      | 19q13.33        | -0.17318 | 0.000675 | 0.002652086 |
| SUSD1        | 9q31.3-q32      | -0.17317 | 0.000676 | 0.002652856 |

|            |                 |          |          |             |
|------------|-----------------|----------|----------|-------------|
| KDM2B      | 12q24.31        | -0.17316 | 0.000676 | 0.002655125 |
| ZNF582     | 19q13.43        | -0.17311 | 0.000679 | 0.002663823 |
| MRPS33     | 7q34            | -0.17307 | 0.000681 | 0.002671584 |
| CBLB       | 3q13.11         | 0.173058 | 0.000681 | 0.002673072 |
| TBC1D31    | 8q24.13         | -0.17305 | 0.000682 | 0.002673867 |
| ZNF790     | 19q13.12        | -0.17305 | 0.000682 | 0.002673867 |
| TNFSF15    | 9q32            | 0.173042 | 0.000682 | 0.002674561 |
| ZNF446     | 19q13.43        | -0.17303 | 0.000683 | 0.002677141 |
| MMP23B     | 1p36.33         | -0.17301 | 0.000684 | 0.002679092 |
| NSD1       | 5q35.3          | 0.172989 | 0.000685 | 0.002683277 |
| FAM27C     | 9q13            | 0.172944 | 0.000687 | 0.002691551 |
| SMARCD3    | 7q36.1          | -0.17293 | 0.000688 | 0.002693389 |
| CEP97      | 3q12.3          | 0.172926 | 0.000688 | 0.002694002 |
| BLK        | 8p23.1          | 0.172918 | 0.000688 | 0.002695079 |
| SLC25A11   | 17p13.2         | 0.172879 | 0.00069  | 0.00270218  |
| ENOX1      | 13q14.11        | -0.17288 | 0.00069  | 0.00270218  |
| LIN7A      | 12q21.31        | -0.17286 | 0.000691 | 0.002704517 |
| HSD3B7     | 16p11.2         | 0.172812 | 0.000694 | 0.002713806 |
| RASD1      | 17p11.2         | 0.172802 | 0.000694 | 0.002715401 |
| TOB1       | 17q21.33        | 0.172766 | 0.000696 | 0.002721893 |
| SFTA2      | 6p21.33         | -0.17264 | 0.000702 | 0.002746018 |
| LGALS9B    | 17p11.2         | 0.172634 | 0.000703 | 0.002747004 |
| KIAA0355   | 19q13.11        | -0.17263 | 0.000703 | 0.002747015 |
| RNF166     | 16q24.2-q24.3   | -0.17263 | 0.000703 | 0.002747015 |
| PGGHG      | 11p15.5         | -0.17262 | 0.000704 | 0.002748628 |
| ROCK1      | 18q11.1         | 0.172566 | 0.000706 | 0.002758556 |
| RCAN1      | 21q22.12        | 0.172557 | 0.000707 | 0.00275983  |
| TFAM       | 10q21.1         | -0.17252 | 0.000708 | 0.002766074 |
| MORC4      | Xq22.3          | 0.172492 | 0.00071  | 0.002771854 |
| CLDN2      | Xq22.3          | 0.172478 | 0.000711 | 0.002774087 |
| CASK       | Xp11.4          | -0.17247 | 0.000711 | 0.002774544 |
| SPTBN1     | 2p16.2          | 0.172455 | 0.000712 | 0.002777561 |
| SMIM11A    | 21q22.11-q22.12 | -0.17244 | 0.000713 | 0.002780059 |
| IGFBP4     | 17q21.2         | -0.17242 | 0.000714 | 0.002783236 |
| ZNHIT6     | 1p22.3          | -0.17242 | 0.000714 | 0.002783236 |
| SPSB3      | 16p13.3         | -0.17241 | 0.000714 | 0.002783607 |
| LOC374443  | 12p13.31        | -0.1724  | 0.000715 | 0.002785282 |
| TMEM160    | 19q13.32        | -0.1724  | 0.000715 | 0.002785569 |
| ZNF415     | 19q13.42        | -0.17238 | 0.000716 | 0.002789338 |
| NFYA       | 6p21.1          | -0.17235 | 0.000717 | 0.002794944 |
| BBS12      | 4q27            | 0.172312 | 0.000719 | 0.002801698 |
| TWF1       | 12q12           | 0.172309 | 0.000719 | 0.002801722 |
| ADIPOR2    | 12p13.33        | 0.172258 | 0.000722 | 0.002811562 |
| PDE3A      | 12p12.2         | -0.17225 | 0.000723 | 0.002812946 |
| EFCAB8     | 20q11.21        | -0.17224 | 0.000723 | 0.002813461 |
| LRIG3      | 12q14.1         | 0.172222 | 0.000724 | 0.002817258 |
| ATP10D     | 4p12            | 0.172217 | 0.000724 | 0.00281781  |
| HS2ST1     | 1p22.3          | -0.1722  | 0.000725 | 0.002819771 |
| TNFRSF13B  | 17p11.2         | 0.172195 | 0.000725 | 0.002821191 |
| ZNRD2      | 11q13.1         | -0.17214 | 0.000728 | 0.002832253 |
| PDE1A      | 2q32.1          | -0.17212 | 0.00073  | 0.002836392 |
| POLB       | 8p11.21         | -0.17211 | 0.00073  | 0.002836751 |
| SETX       | 9q34.13         | 0.172108 | 0.00073  | 0.002836751 |
| LOXL3      | 2p13.1          | -0.17209 | 0.000731 | 0.002839344 |
| NACC1      | 19p13.13        | 0.172077 | 0.000732 | 0.00284216  |
| PTGES2-AS1 | 9q34.11         | -0.17207 | 0.000732 | 0.00284285  |
| SNPH       | 20p13           | 0.17205  | 0.000733 | 0.002846422 |
| ARHGEF10   | 8p23.3          | 0.172012 | 0.000735 | 0.002853915 |

|            |                 |          |          |             |
|------------|-----------------|----------|----------|-------------|
| ELF1       | 13q14.11        | -0.17198 | 0.000737 | 0.002859845 |
| MAMLD1     | Xq28            | 0.171977 | 0.000737 | 0.002859845 |
| GRP        | 18q21.32        | -0.17196 | 0.000738 | 0.002862983 |
| PWARSN     | 15q11.2         | -0.17195 | 0.000738 | 0.002864402 |
| NFIB       | 9p23-p22.3      | 0.171938 | 0.000739 | 0.002865748 |
| RRP8       | 11p15.4         | -0.17194 | 0.000739 | 0.002865748 |
| POC1B      | 12q21.33        | 0.171925 | 0.00074  | 0.002867651 |
| RAX        | 18q21.32        | -0.17192 | 0.00074  | 0.002867651 |
| ZSCAN20    | 1p35.1          | -0.17191 | 0.000741 | 0.002870608 |
| STN1       | 10q24.33        | 0.171876 | 0.000742 | 0.002875924 |
| PJA2       | 5q21.3          | 0.171876 | 0.000742 | 0.002875924 |
| CCDC88C    | 14q32.11-q32.12 | 0.171873 | 0.000743 | 0.002875924 |
| PHETA1     | 12q24.12        | 0.171842 | 0.000744 | 0.00288187  |
| CORO6      | 17q11.2         | -0.17183 | 0.000745 | 0.002884283 |
| ADGRD1     | 12q24.33        | -0.1718  | 0.000746 | 0.002889157 |
| NOL7       | 6p23            | -0.17179 | 0.000747 | 0.002891886 |
| MAPK8IP1P2 | 17q21.31        | -0.17174 | 0.00075  | 0.00289992  |
| GABPB1-AS1 | 15q21.2         | -0.17174 | 0.00075  | 0.00289992  |
| PHC1       | 12p13.31        | -0.17171 | 0.000751 | 0.002906378 |
| TNNI3      | 19q13.42        | -0.17171 | 0.000752 | 0.002906378 |
| ATOX1      | 5q33.1          | -0.17169 | 0.000752 | 0.002909088 |
| WFDC10B    | 20q13.12        | -0.17169 | 0.000753 | 0.00290912  |
| PNPLA4     | Xp22.31         | -0.17167 | 0.000753 | 0.002911452 |
| DDN        | 12q13.12        | -0.17162 | 0.000756 | 0.002921327 |
| LSAMP      | 3q13.31         | -0.17162 | 0.000756 | 0.002921763 |
| CDH16      | 16q22.1         | 0.171611 | 0.000757 | 0.002923033 |
| MPV17L     | 16p13.11        | -0.17158 | 0.000758 | 0.002928822 |
| CADM1      | 11q23.3         | -0.17157 | 0.000759 | 0.002930676 |
| SPARC      | 5q33.1          | -0.17156 | 0.00076  | 0.002932527 |
| LARGE1     | 22q12.3         | 0.171529 | 0.000761 | 0.002938261 |
| ECPAS      | 9q31.3          | 0.17149  | 0.000763 | 0.002945928 |
| CDRT4      | 17p12           | 0.171435 | 0.000766 | 0.002956967 |
| ARMC12     | 6p21.31         | -0.17143 | 0.000767 | 0.002958399 |
| TMEM161B   | 5q14.3          | 0.171422 | 0.000767 | 0.002958632 |
| THSD7B     | 2q22.1          | -0.17142 | 0.000767 | 0.002958779 |
| THY1       | 11q23.3         | -0.1714  | 0.000769 | 0.002962691 |
| ST13P4     | 13q14.2         | -0.17139 | 0.000769 | 0.002962903 |
| CORIN      | 4p12            | -0.17139 | 0.000769 | 0.002962906 |
| RHOV       | 15q15.1         | 0.171387 | 0.000769 | 0.00296342  |
| NALCN      | 13q32.3-q33.1   | -0.17138 | 0.00077  | 0.002964859 |
| NRBP1      | 2p23.3          | -0.17137 | 0.00077  | 0.002964859 |
| C6ORF223   | 6p21.1          | -0.17137 | 0.00077  | 0.002965118 |
| CD28       | 2q33.2          | 0.171312 | 0.000773 | 0.002977099 |
| ZC3H12A    | 1p34.3          | 0.171292 | 0.000774 | 0.002980831 |
| EPM2AIP1   | 3p22.2          | -0.17126 | 0.000776 | 0.002987533 |
| ZNF365     | 10q21.2         | -0.17125 | 0.000777 | 0.002988345 |
| GLIS2      | 16p13.3         | -0.17123 | 0.000778 | 0.00299189  |
| CAMSAP2    | 1q32.1          | -0.17123 | 0.000778 | 0.00299189  |
| EIPR1      | 2p25.3          | -0.17122 | 0.000778 | 0.002992709 |
| WARS       | 14q32.2         | 0.171215 | 0.000779 | 0.0029939   |
| RCC1L      | 7q11.23         | -0.1712  | 0.00078  | 0.002997185 |
| ZG16       | 16p11.2         | 0.171165 | 0.000782 | 0.003003744 |
| MMP20      | 11q22.2         | -0.17114 | 0.000783 | 0.003008041 |
| DBI        | 2q14.2          | -0.17114 | 0.000783 | 0.003008505 |
| ARHGEF17   | 11q13.4         | -0.1711  | 0.000785 | 0.003016666 |
| WASL       | 7q31.32         | 0.171071 | 0.000787 | 0.003021662 |
| STRN3      | 14q12           | 0.171067 | 0.000787 | 0.00302202  |
| IL2RB      | 22q12.3         | 0.17105  | 0.000788 | 0.003025239 |

|           |               |          |          |             |
|-----------|---------------|----------|----------|-------------|
| ERO1A     | 14q22.1       | 0.171045 | 0.000788 | 0.003025738 |
| PPM1E     | 17q22         | -0.17099 | 0.000792 | 0.003037631 |
| MVB12A    | 19p13.11      | -0.17097 | 0.000792 | 0.003040049 |
| IL4R      | 16p12.1       | 0.170968 | 0.000793 | 0.003040833 |
| LINC00052 | 15q25.3       | -0.17095 | 0.000794 | 0.003044352 |
| ZNF668    | 16p11.2       | -0.17092 | 0.000795 | 0.003049863 |
| ATP5CKMT  | 5p15.2        | -0.1709  | 0.000796 | 0.003052525 |
| TMED2     | 12q24.31      | 0.170904 | 0.000796 | 0.003052525 |
| ZNF831    | 20q13.32      | 0.170855 | 0.000799 | 0.003062723 |
| SAXO2     | 15q25.2       | 0.170822 | 0.000801 | 0.003069278 |
| URAHP     | 16q24.3       | -0.17082 | 0.000801 | 0.00306988  |
| TMEM168   | 7q31.1        | 0.170781 | 0.000803 | 0.003077339 |
| PACS1     | 11q13.1-q13.2 | -0.17072 | 0.000807 | 0.003089469 |
| SLC35F1   | 6q22.2-q22.31 | -0.17072 | 0.000807 | 0.003089469 |
| PROCA1    | 17q11.2       | -0.17071 | 0.000807 | 0.003090156 |
| TTC30A    | 2q31.2        | -0.17068 | 0.000809 | 0.003096582 |
| MSRB3     | 12q14.3       | -0.17067 | 0.00081  | 0.003099826 |
| SERF1A    | 5q13.2        | -0.17065 | 0.000811 | 0.003102017 |
| CXXC4     | 4q24          | -0.17062 | 0.000813 | 0.003108365 |
| ARRDC5    | 19p13.3       | 0.17062  | 0.000813 | 0.003108365 |
| DNAJA4    | 15q25.1       | 0.170609 | 0.000813 | 0.003110091 |
| ZNF568    | 19q13.12      | -0.17046 | 0.000822 | 0.003143473 |
| ZNF439    | 19p13.2       | -0.17046 | 0.000822 | 0.003143473 |
| PMPCB     | 7q22.1        | -0.17043 | 0.000824 | 0.003148466 |
| LMOD3     | 3p14.1        | -0.17042 | 0.000825 | 0.003150364 |
| BTN3A3    | 6p22.2        | 0.170413 | 0.000825 | 0.003151207 |
| RAB34     | 17q11.2       | -0.17039 | 0.000826 | 0.003155821 |
| ITGBL1    | 13q33.1       | -0.17034 | 0.000829 | 0.00316655  |
| CSTF3     | 11p13         | -0.17031 | 0.000831 | 0.003171968 |
| BCL2      | 18q21.33      | 0.170311 | 0.000831 | 0.003172001 |
| POMK      | 8p11.21       | 0.1703   | 0.000832 | 0.003173994 |
| ITPRID1   | 7p14.3        | 0.170287 | 0.000832 | 0.003176222 |
| S1PR3     | 9q22.1        | -0.17028 | 0.000833 | 0.003176855 |
| KIAA0319  | 6p22.3        | 0.170223 | 0.000836 | 0.003189664 |
| SAP18     | 13q12.11      | -0.17018 | 0.000839 | 0.003198215 |
| MAPK13    | 6p21.31       | -0.17018 | 0.000839 | 0.003198215 |
| TTI2      | 8p12          | 0.170163 | 0.00084  | 0.003201607 |
| LMO3      | 12p12.3       | -0.17015 | 0.000841 | 0.003204228 |
| ZNF514    | 2q11.1        | -0.1701  | 0.000844 | 0.003214295 |
| LILRP2    | 19q13.42      | 0.170055 | 0.000846 | 0.003224658 |
| ENPEP     | 4q25          | -0.17004 | 0.000848 | 0.003228178 |
| ULK4P3    | 15q13.2       | 0.170009 | 0.000849 | 0.003233511 |
| METTL15   | 11p14.1       | 0.170008 | 0.000849 | 0.003233511 |
| LAMTOR4   | 7q22.1        | -0.17001 | 0.000849 | 0.003233511 |
| CUX1      | 7q22.1        | -0.17    | 0.00085  | 0.003235091 |
| MTHFD1    | 14q23.3       | 0.169984 | 0.000851 | 0.00323747  |
| CMTM1     | 16q21         | 0.169933 | 0.000854 | 0.003248602 |
| SUSD6     | 14q24.1       | 0.169928 | 0.000854 | 0.003249139 |
| ARMCX3    | Xq22.1        | -0.16992 | 0.000855 | 0.003250475 |
| ZNF474    | 5q23.2        | -0.1699  | 0.000856 | 0.003254426 |
| BLZF1     | 1q24.2        | 0.169897 | 0.000856 | 0.003254426 |
| PBLD      | 10q21.3       | 0.169886 | 0.000857 | 0.003256395 |
| TMEM240   | 1p36.33       | -0.16988 | 0.000857 | 0.003258136 |
| ZNF585A   | 19q13.12      | -0.16987 | 0.000858 | 0.003258356 |
| LAYN      | 11q23.1       | -0.16987 | 0.000858 | 0.003258356 |
| QTRT1     | 19p13.2       | -0.16985 | 0.000859 | 0.003262158 |
| KLHL4     | Xq21.31       | -0.16985 | 0.000859 | 0.003262316 |
| PTPN22    | 1p13.2        | 0.169836 | 0.00086  | 0.00326434  |



|             |                |          |          |             |
|-------------|----------------|----------|----------|-------------|
| YLPM1       | 14q24.3        | 0.169826 | 0.00086  | 0.003266141 |
| CUL3        | 2q36.2         | -0.16982 | 0.000861 | 0.003266141 |
| KLC3        | 19q13.32       | -0.16982 | 0.000861 | 0.003266141 |
| RNF121      | 11q13.4        | -0.16982 | 0.000861 | 0.003266141 |
| DONSON      | 21q22.11       | 0.169798 | 0.000862 | 0.003270204 |
| IER5L       | 9q34.11        | -0.16979 | 0.000863 | 0.003271096 |
| NMU         | 4q12           | 0.169728 | 0.000866 | 0.00328535  |
| PRSS30P     | 16p13.3        | -0.16966 | 0.000871 | 0.003300497 |
| ZFYVE21     | 14q32.33       | 0.169646 | 0.000872 | 0.003303546 |
| SUGT1P3     | 13q14.11       | -0.16956 | 0.000877 | 0.003323656 |
| ZC3H18      | 16q24.2        | -0.16956 | 0.000877 | 0.003323656 |
| CNTNAP5     | 2q14.3         | -0.16955 | 0.000878 | 0.003325408 |
| EEF1G       | 11q12.3        | -0.16954 | 0.000878 | 0.003326746 |
| CD22        | 19q13.12       | 0.169526 | 0.000879 | 0.003328779 |
| SLC41A3     | 3q21.2-q21.3   | -0.16951 | 0.00088  | 0.003331991 |
| SSR3        | 3q25.31        | 0.169507 | 0.00088  | 0.003332078 |
| ITGB8       | 7p21.1         | -0.16948 | 0.000882 | 0.003338886 |
| PDE4B       | 1p31.3         | 0.169453 | 0.000884 | 0.003343546 |
| ZBED6CL     | 7q36.1         | -0.16945 | 0.000884 | 0.003344456 |
| SNORD116-28 | 15q11.2        | -0.16944 | 0.000885 | 0.003345584 |
| ACBD7       | 10p13          | -0.16942 | 0.000885 | 0.00334844  |
| BLOC1S1     | 12q13.2        | 0.169353 | 0.00089  | 0.003365038 |
| CALM1       | 14q32.11       | 0.169321 | 0.000892 | 0.003372218 |
| ESRP2       | 16q22.1        | 0.169306 | 0.000893 | 0.003375054 |
| PAX4        | 7q32.1         | 0.169295 | 0.000894 | 0.003377131 |
| ZMAT4       | 8p11.21        | -0.16928 | 0.000895 | 0.003379431 |
| RAP1GAP2    | 17p13.3        | 0.169265 | 0.000896 | 0.003383107 |
| ALKAL1      | 8q11.23        | -0.16926 | 0.000896 | 0.00338365  |
| KIF14       | 1q32.1         | 0.169257 | 0.000896 | 0.00338365  |
| PTPN13      | 4q21.3         | 0.169224 | 0.000898 | 0.003391022 |
| DOCK6       | 19p13.2        | -0.16921 | 0.000899 | 0.003392831 |
| OPCML       | 11q25          | -0.16921 | 0.000899 | 0.003393142 |
| TMEM107     | 17p13.1        | 0.169193 | 0.0009   | 0.003396555 |
| PIBF1       | 13q21.33-q22.1 | -0.16918 | 0.000901 | 0.003398054 |
| MAP1A       | 15q15.3        | -0.16916 | 0.000902 | 0.003402268 |
| GPX2        | 14q23.3        | -0.16916 | 0.000903 | 0.003403508 |
| LINC01257   | 12q24.33       | -0.16911 | 0.000906 | 0.003415347 |
| GATD3A      | 21q22.3        | 0.169048 | 0.00091  | 0.003428747 |
| SLC9B2      | 4q24           | -0.16904 | 0.00091  | 0.003430837 |
| OGN         | 9q22.31        | -0.16903 | 0.000911 | 0.003432593 |
| MGC16142    | -              | -0.16901 | 0.000912 | 0.00343576  |
| PYHIN1      | 1q23.1         | 0.169    | 0.000913 | 0.003437629 |
| GIGYF1      | 7q22.1         | -0.169   | 0.000913 | 0.003437629 |
| COPG2       | 7q32.2         | -0.169   | 0.000913 | 0.003437721 |
| PDGFC       | 4q32.1         | -0.16899 | 0.000914 | 0.00343892  |
| POLM        | 7p13           | -0.16896 | 0.000915 | 0.003444026 |
| CD69        | 12p13.31       | 0.168958 | 0.000915 | 0.0034444   |
| PIK3C3      | 18q12.3        | 0.168956 | 0.000916 | 0.0034444   |
| DNASE1L3    | 3p14.3         | 0.168955 | 0.000916 | 0.0034444   |
| LOXL4       | 10q24.2        | -0.16893 | 0.000917 | 0.003449945 |
| CTSD        | 11p15.5        | 0.168925 | 0.000918 | 0.003450461 |
| JAK1        | 1p31.3         | 0.168913 | 0.000918 | 0.003452723 |
| GPR82       | Xp11.4         | 0.1689   | 0.000919 | 0.003455243 |
| PIP         | 7q34           | 0.168898 | 0.000919 | 0.003455243 |
| CLECL1      | 12p13.31       | 0.16889  | 0.00092  | 0.003456411 |
| SLC25A15    | 13q14.11       | -0.16888 | 0.000921 | 0.003459346 |
| CLIC4       | 1p36.11        | -0.16885 | 0.000923 | 0.003465754 |
| SLC4A10     | 2q24.2         | 0.168804 | 0.000926 | 0.003475669 |

|           |          |          |          |             |
|-----------|----------|----------|----------|-------------|
| EIF3CL    | 16p12.1  | -0.16879 | 0.000927 | 0.003479296 |
| CENPT     | 16q22.1  | -0.16878 | 0.000927 | 0.003479603 |
| CIRBP-AS1 | 19p13.3  | 0.16878  | 0.000927 | 0.003479613 |
| TAAR1     | 6q23.2   | 0.168744 | 0.00093  | 0.003488068 |
| MTF2      | 1p22.1   | -0.16872 | 0.000931 | 0.003492769 |
| LAX1      | 1q32.1   | 0.168718 | 0.000931 | 0.003492769 |
| HSD3B2    | 1p12     | 0.168717 | 0.000931 | 0.003492769 |
| CCZ1      | 7p22.1   | -0.16867 | 0.000934 | 0.003503858 |
| CD163L1   | 12p13.31 | 0.168522 | 0.000944 | 0.003540063 |
| CADM4     | 19q13.31 | -0.16848 | 0.000947 | 0.00354905  |
| ZNF706    | 8q22.3   | -0.16847 | 0.000948 | 0.003551318 |
| FCRL5     | 1q23.1   | 0.168459 | 0.000949 | 0.003554112 |
| MTIF3     | 13q12.2  | -0.16842 | 0.000951 | 0.003563476 |
| RAPGEFL1  | 17q21.1  | 0.168372 | 0.000954 | 0.003574647 |
| PDIA5     | 3q21.1   | 0.168359 | 0.000955 | 0.003576972 |
| KLHL26    | 19p13.11 | 0.168358 | 0.000955 | 0.003576972 |
| DUSP9     | Xq28     | -0.16835 | 0.000956 | 0.003579515 |
| SCG5      | 15q13.3  | 0.168328 | 0.000957 | 0.003583238 |
| ZNF343    | 20p13    | -0.16825 | 0.000963 | 0.003603152 |
| ELK1      | Xp11.23  | -0.16822 | 0.000965 | 0.003608866 |
| ELFN1     | 7p22.3   | -0.1682  | 0.000966 | 0.003614311 |
| HERC5     | 4q22.1   | -0.16819 | 0.000967 | 0.003615736 |
| ARMC5     | 16p11.2  | -0.16818 | 0.000968 | 0.003618927 |
| DPYSL2    | 8p21.2   | 0.16817  | 0.000968 | 0.003619467 |
| NEUROD1   | 2q31.3   | -0.16816 | 0.000969 | 0.003620624 |
| UBXN2A    | 2p23.3   | -0.1681  | 0.000973 | 0.003636775 |
| UBASH3B   | 11q24.1  | 0.168061 | 0.000976 | 0.003645028 |
| MRPL18    | 6q25.3   | -0.16806 | 0.000976 | 0.003645028 |
| FSTL5     | 4q32.2   | -0.16805 | 0.000976 | 0.003646001 |
| CD180     | 5q12.3   | 0.168046 | 0.000977 | 0.003647097 |
| MORN5     | 9q33.2   | -0.16804 | 0.000977 | 0.003647097 |
| ZNF788P   | 19p13.2  | -0.16803 | 0.000978 | 0.003649058 |
| SRP54     | 14q13.2  | 0.168029 | 0.000978 | 0.003649058 |
| STAM2     | 2q23.3   | 0.168029 | 0.000978 | 0.003649058 |
| PDK3      | Xp22.11  | -0.16803 | 0.000978 | 0.003649058 |
| STAR      | 8p11.23  | 0.168008 | 0.000979 | 0.003652648 |
| TM4SF20   | 2q36.3   | 0.168007 | 0.000979 | 0.003652648 |
| LINC01555 | 1p22.3   | -0.168   | 0.00098  | 0.003654986 |
| CALHM5    | 6q22.1   | -0.16797 | 0.000982 | 0.003661559 |
| GPCPD1    | 20p12.3  | -0.16795 | 0.000983 | 0.003664619 |
| BEX2      | Xq22.2   | -0.16792 | 0.000986 | 0.003673154 |
| C19ORF57  | 19p13.12 | 0.167894 | 0.000987 | 0.003678591 |
| FAM66C    | 12p13.31 | -0.16789 | 0.000988 | 0.003680205 |
| KIF1A     | 2q37.3   | -0.16787 | 0.000989 | 0.003683728 |
| MAPK1IP1L | 14q22.3  | 0.167859 | 0.00099  | 0.003685797 |
| NFATC4    | 14q12    | -0.16785 | 0.00099  | 0.003686966 |
| CPD       | 17q11.2  | 0.16781  | 0.000993 | 0.003697138 |
| HFM1      | 1p22.2   | -0.16779 | 0.000994 | 0.003700699 |
| CASC3     | 17q21.1  | -0.16779 | 0.000995 | 0.0037014   |
| HEY1      | 8q21.13  | -0.16777 | 0.000996 | 0.00370623  |
| PANX1     | 11q21    | -0.16776 | 0.000996 | 0.00370623  |
| SLC18A1   | 8p21.3   | 0.167714 | 0.001    | 0.003718922 |
| MTLN      | 2q13     | -0.16771 | 0.001    | 0.003719044 |
| PDIA6     | 2p25.1   | -0.1677  | 0.001001 | 0.003721866 |
| CCNE1     | 19q12    | -0.16769 | 0.001002 | 0.00372435  |
| CCDC24    | 1p34.1   | -0.16765 | 0.001004 | 0.003732741 |
| ST3GAL2   | 16q22.1  | -0.16755 | 0.001012 | 0.003758497 |
| MYLK4     | 6p25.2   | -0.16754 | 0.001013 | 0.003761656 |

|          |            |          |          |             |
|----------|------------|----------|----------|-------------|
| WHAMMP2  | 15q13.1    | -0.16752 | 0.001014 | 0.00376454  |
| DCK      | 4q13.3     | 0.167498 | 0.001015 | 0.003770489 |
| CLEC2A   | 12p13.31   | -0.1675  | 0.001016 | 0.003770489 |
| RNASE1   | 14q11.2    | 0.167448 | 0.001019 | 0.003781771 |
| PPP1R16B | 20q11.23   | 0.167448 | 0.001019 | 0.003781771 |
| RGS13    | 1q31.2     | 0.167393 | 0.001023 | 0.003795714 |
| TGFB2    | 1q41       | -0.16733 | 0.001027 | 0.003811415 |
| TPRG1L   | 1p36.32    | 0.167326 | 0.001028 | 0.003812389 |
| PLEKHS1  | 10q25.3    | 0.167323 | 0.001028 | 0.003812494 |
| SGIP1    | 1p31.3     | -0.1673  | 0.00103  | 0.003819175 |
| TAF5L    | 1q42.13    | 0.167293 | 0.00103  | 0.003819198 |
| LPP      | 3q27.3-q28 | 0.167279 | 0.001031 | 0.003821604 |
| RARS2    | 6q15       | -0.16728 | 0.001031 | 0.003821604 |
| MOSMO    | 16p12.2    | -0.16728 | 0.001031 | 0.003821604 |
| NICN1    | 3p21.31    | -0.16723 | 0.001035 | 0.003833163 |
| PITX2    | 4q25       | -0.1672  | 0.001037 | 0.003839045 |
| CD160    | 1q21.1     | 0.167203 | 0.001037 | 0.003839045 |
| NCR1     | 19q13.42   | 0.167201 | 0.001037 | 0.003839045 |
| GDAP1    | 8q21.11    | -0.16718 | 0.001039 | 0.003844782 |
| VSTM2L   | 20q11.23   | -0.16716 | 0.00104  | 0.003847623 |
| CD27     | 12p13.31   | 0.167162 | 0.00104  | 0.003847623 |
| SEMA3B   | 3p21.31    | 0.167145 | 0.001041 | 0.003851344 |
| PLXNA3   | Xq28       | -0.16714 | 0.001041 | 0.003851344 |
| HOXC6    | 12q13.13   | 0.167131 | 0.001042 | 0.003853605 |
| RPLP1    | 15q23      | -0.16713 | 0.001042 | 0.003853605 |
| CXCR3    | Xq13.1     | -0.16712 | 0.001043 | 0.003854406 |
| CEP89    | 19q13.11   | -0.16712 | 0.001043 | 0.003854406 |
| NT5DC3   | 12q23.3    | 0.167055 | 0.001048 | 0.003871574 |
| CRYBA2   | 2q35       | 0.167028 | 0.00105  | 0.003878427 |
| DTL      | 1q32.3     | 0.167021 | 0.00105  | 0.003879434 |
| INS-IGF2 | 11p15.5    | -0.16699 | 0.001052 | 0.003887366 |
| ZNF513   | 2p23.3     | -0.16696 | 0.001055 | 0.00389504  |
| CPE      | 4q32.3     | -0.16695 | 0.001055 | 0.003895917 |
| RNF168   | 3q29       | 0.1669   | 0.001059 | 0.003909696 |
| ASL      | 7q11.21    | 0.166894 | 0.00106  | 0.003910694 |
| MCUR1    | 6p23       | -0.16689 | 0.00106  | 0.003910804 |
| CDCA2    | 8p21.2     | 0.166874 | 0.001061 | 0.003914709 |
| QRSL1    | 6q21       | -0.16685 | 0.001063 | 0.003921649 |
| EIF1AX   | Xp22.12    | -0.16678 | 0.001068 | 0.003938493 |
| FCRL2    | 1q23.1     | 0.16677  | 0.001069 | 0.003940803 |
| APBA1    | 9q21.12    | 0.16677  | 0.001069 | 0.003940803 |
| ZSCAN10  | 16p13.3    | -0.16676 | 0.001069 | 0.003941024 |
| HECTD1   | 14q12      | 0.166764 | 0.001069 | 0.003941024 |
| THEM6    | 8q24.3     | -0.16676 | 0.00107  | 0.003942329 |
| ATP6V1A  | 3q13.31    | 0.16673  | 0.001072 | 0.003948775 |
| PRPS1    | Xq22.3     | -0.16673 | 0.001072 | 0.003949005 |
| UBR2     | 6p21.1     | 0.166695 | 0.001075 | 0.003957258 |
| GLA      | Xq22.1     | -0.16668 | 0.001075 | 0.003959588 |
| RNF139   | 8q24.13    | -0.16668 | 0.001076 | 0.003960119 |
| PPM1N    | 19q13.32   | 0.166674 | 0.001076 | 0.0039604   |
| DLL1     | 6q27       | 0.166673 | 0.001076 | 0.0039604   |
| RANBP1   | 22q11.21   | -0.16666 | 0.001077 | 0.003962528 |
| RPL23P8  | 7p21.1     | -0.16666 | 0.001077 | 0.003962528 |
| COL9A1   | 6q13       | -0.16666 | 0.001077 | 0.003962528 |
| STT3B    | 3p23       | -0.16664 | 0.001078 | 0.003965951 |
| ADD1     | 4p16.3     | 0.166635 | 0.001079 | 0.003967384 |
| TMEM121B | 22q11.1    | 0.166602 | 0.001082 | 0.003975846 |
| TCF25    | 16q24.3    | 0.166599 | 0.001082 | 0.003975846 |

|           |          |          |          |             |
|-----------|----------|----------|----------|-------------|
| HOPX      | 4q12     | -0.16659 | 0.001083 | 0.003978848 |
| MRPS36    | 5q13.2   | 0.166561 | 0.001085 | 0.003985047 |
| TWIST2    | 2q37.3   | -0.16654 | 0.001086 | 0.003989437 |
| OGFOD1    | 16q13    | -0.16654 | 0.001086 | 0.003989437 |
| PDGFB     | 22q13.1  | -0.16653 | 0.001087 | 0.003990577 |
| PLOD3     | 7q22.1   | -0.16653 | 0.001087 | 0.003991173 |
| TXNRD3NB  | 3q21.3   | -0.16649 | 0.00109  | 0.004001323 |
| PHKG2     | 16p11.2  | -0.16648 | 0.001091 | 0.004004161 |
| PRIM2     | 6p11.2   | -0.16647 | 0.001091 | 0.004004269 |
| SPIRE2    | 16q24.3  | -0.16647 | 0.001091 | 0.004004269 |
| CD1B      | 1q23.1   | 0.166465 | 0.001092 | 0.004005441 |
| SEMA4F    | 2p13.1   | -0.16642 | 0.001095 | 0.004016324 |
| EXOC8     | 1q42.2   | 0.166385 | 0.001098 | 0.004026471 |
| SNX16     | 8q21.13  | -0.16636 | 0.0011   | 0.004033165 |
| PRTG      | 15q21.3  | -0.16635 | 0.001101 | 0.00403401  |
| DNAJB6    | 7q36.3   | -0.16635 | 0.001101 | 0.004034554 |
| PDF       | 16q22.1  | -0.16631 | 0.001104 | 0.004044437 |
| CEP85L    | 6q22.31  | 0.166266 | 0.001107 | 0.00405673  |
| SRPK1     | 6p21.31  | -0.16626 | 0.001108 | 0.004057645 |
| RIMBP3    | 22q11.21 | 0.166245 | 0.001109 | 0.004061246 |
| GVINP1    | 11p15.4  | 0.166233 | 0.00111  | 0.00406299  |
| PNMA8A    | 19q13.32 | -0.16623 | 0.00111  | 0.00406299  |
| LEMD2     | 6p21.31  | -0.16619 | 0.001113 | 0.004074072 |
| DYNLL2    | 17q22    | -0.16619 | 0.001113 | 0.004074072 |
| MTA3      | 2p21     | -0.16612 | 0.001119 | 0.004094165 |
| EOMES     | 3p24.1   | 0.16608  | 0.001122 | 0.004103857 |
| NDNF      | 4q27     | 0.166058 | 0.001124 | 0.004109507 |
| CST3      | 20p11.21 | -0.16604 | 0.001125 | 0.004112603 |
| B4GALT1   | 9p21.1   | 0.16599  | 0.001129 | 0.004126852 |
| CITED1    | Xq13.1   | 0.16599  | 0.001129 | 0.004126852 |
| OTUD5     | Xp11.23  | -0.16598 | 0.001129 | 0.004127813 |
| INO80C    | 18q12.2  | 0.165965 | 0.001131 | 0.004132446 |
| TNFRSF10D | 8p21.3   | 0.165911 | 0.001135 | 0.004147076 |
| LINC01106 | 2q13     | -0.16591 | 0.001135 | 0.004147076 |
| SNX12     | Xq13.1   | -0.16587 | 0.001138 | 0.004156139 |
| SH3BGRL2  | 6q14.1   | 0.165873 | 0.001138 | 0.004156139 |
| TRAPPC6A  | 19q13.32 | -0.16585 | 0.00114  | 0.004161462 |
| TCP1      | 6q25.3   | -0.16584 | 0.001141 | 0.004164091 |
| TIGD3     | 11q13.1  | -0.16578 | 0.001146 | 0.004180367 |
| RRAGA     | 9p22.1   | -0.16577 | 0.001147 | 0.004184712 |
| DCBLD2    | 3q12.1 3 | -0.16574 | 0.001149 | 0.00419032  |
| PPP2R2A   | 8p21.2   | 0.165739 | 0.001149 | 0.004190946 |
| PRELP     | 1q32.1   | -0.16573 | 0.00115  | 0.00419195  |
| TLK2      | 17q23.2  | -0.16573 | 0.00115  | 0.004192892 |
| NFRKB     | 11q24.3  | -0.16571 | 0.001152 | 0.004197942 |
| CUTC      | 10q24.2  | -0.16566 | 0.001155 | 0.004210028 |
| HDAC6     | Xp11.23  | -0.16565 | 0.001156 | 0.004214111 |
| TICAM1    | 19p13.3  | 0.165611 | 0.001159 | 0.004223857 |
| NOS1      | 12q24.22 | -0.16559 | 0.001161 | 0.00422857  |
| MAP3K21   | 1q42.2   | 0.165533 | 0.001166 | 0.00424545  |
| ZNF16     | 8q24.3   | -0.16549 | 0.001169 | 0.004256573 |
| LOH12CR2  | 12p13.2  | -0.16548 | 0.00117  | 0.004261017 |
| SPATA31A3 | 9q21.11  | -0.16547 | 0.001171 | 0.004261158 |
| FAAP20    | 1p36.33  | -0.16543 | 0.001174 | 0.004272591 |
| KCNK5     | 6p21.2   | -0.16543 | 0.001174 | 0.004272779 |
| BORA      | 13q21.33 | -0.16542 | 0.001175 | 0.004275537 |
| EBPL      | 13q14.2  | -0.16541 | 0.001176 | 0.00427804  |
| IRF3      | 19q13.33 | -0.1654  | 0.001177 | 0.004280094 |

|            |                 |          |          |             |
|------------|-----------------|----------|----------|-------------|
| SHLD2P3    | 10q11.22        | 0.165374 | 0.001179 | 0.004285948 |
| CEACAM21   | 19q13.2         | -0.16536 | 0.00118  | 0.004290386 |
| DNM3       | 1q24.3          | -0.16534 | 0.001182 | 0.004295548 |
| CRLF1      | 19p13.11        | -0.16533 | 0.001182 | 0.004296211 |
| MRTO4      | 1p36.13         | -0.16532 | 0.001184 | 0.004300189 |
| FIS1       | 7q22.1          | -0.16531 | 0.001184 | 0.004300508 |
| KIR3DL3    | 19q13.42        | 0.165252 | 0.001189 | 0.004317927 |
| TMED4      | 7p13            | -0.16521 | 0.001193 | 0.004331036 |
| TTC9C      | 11q12.3         | -0.16518 | 0.001195 | 0.004337801 |
| IDH3G      | Xq28            | -0.16515 | 0.001197 | 0.004345359 |
| KCTD10     | 12q24.11        | -0.16515 | 0.001198 | 0.004345843 |
| MDS2       | 1p36.11         | -0.16515 | 0.001198 | 0.004345843 |
| PAK5       | 20p12.2         | -0.1651  | 0.001201 | 0.00435868  |
| DHRS1      | 14q12           | 0.16506  | 0.001205 | 0.004370328 |
| GUSBP5     | 4q31.21         | -0.16505 | 0.001205 | 0.004371219 |
| LRRC36     | 16q22.1         | -0.16505 | 0.001206 | 0.004372118 |
| GPR174     | Xq21.1          | 0.165041 | 0.001206 | 0.00437402  |
| TSPEAR-AS2 | 21q22.3         | -0.165   | 0.00121  | 0.004386037 |
| FBXO28     | 1q42.11         | 0.164974 | 0.001212 | 0.004392722 |
| CD209      | 19p13.2         | 0.164945 | 0.001215 | 0.004400763 |
| LRP12      | 8q22.3          | -0.16488 | 0.00122  | 0.004420199 |
| CTAG1B     | Xq28            | -0.16481 | 0.001226 | 0.004441311 |
| RAB25      | 1q22            | 0.164806 | 0.001226 | 0.004441311 |
| DNAH7      | 2q32.3          | 0.164767 | 0.00123  | 0.004452564 |
| UBE2E2     | 3p24.3          | -0.16473 | 0.001232 | 0.004461844 |
| PANK4      | 1p36.32         | 0.164728 | 0.001233 | 0.004462976 |
| ACADVL     | 17p13.1         | 0.164696 | 0.001236 | 0.004472205 |
| NCK1       | 3q22.3          | 0.164656 | 0.001239 | 0.004483869 |
| DDIAS      | 11q14.1         | -0.16465 | 0.00124  | 0.004484871 |
| NUDT4      | 12q22           | -0.16465 | 0.00124  | 0.00448527  |
| CHRNA7     | 2q37.1          | -0.16464 | 0.00124  | 0.004485548 |
| LIF        | 22q12.2         | 0.164551 | 0.001248 | 0.004513277 |
| TSPAN9     | 12p13.33-p13.32 | -0.16452 | 0.001251 | 0.004521922 |
| MRM1       | 17q12           | -0.16451 | 0.001252 | 0.004523545 |
| NPSR1-AS1  | 7p14.3          | 0.164502 | 0.001253 | 0.004526212 |
| ZNF354C    | 5q35.3          | -0.16448 | 0.001255 | 0.004533511 |
| CCT3       | 1q22            | -0.16446 | 0.001256 | 0.004536597 |
| ZFX4-AS1   | 8q21.13         | -0.16446 | 0.001256 | 0.004536597 |
| NDUFB9     | 8q24.13         | -0.16445 | 0.001257 | 0.004537957 |
| TMEM53     | 1p34.1          | 0.164452 | 0.001257 | 0.004537957 |
| RPS19      | 19q13.2         | -0.16444 | 0.001258 | 0.004540057 |
| TTC28-AS1  | 22q12.1         | -0.16444 | 0.001258 | 0.004541412 |
| SEPTIN4    | 17q22           | -0.16441 | 0.00126  | 0.004547593 |
| DHRS7C     | 17p13.1         | 0.164359 | 0.001265 | 0.004564252 |
| ZNF14      | 19p13.11        | -0.16435 | 0.001266 | 0.004565297 |
| ARMC1      | 8q13.1          | -0.16435 | 0.001266 | 0.004566863 |
| RFLNA      | 12q24.31        | 0.16431  | 0.001269 | 0.004577109 |
| AKIP1      | 11p15.4         | -0.16429 | 0.001271 | 0.004583608 |
| SMARCA1    | Xq25-q26.1      | -0.16426 | 0.001274 | 0.004590802 |
| HSD17B7P2  | 10p11.1         | -0.16423 | 0.001276 | 0.004599929 |
| IRF4       | 6p25.3          | 0.16422  | 0.001277 | 0.0046024   |
| KCNMB3     | 3q26.32         | -0.16422 | 0.001278 | 0.00460329  |
| TBX10      | 11q13.2         | -0.16414 | 0.001284 | 0.004626011 |
| EF3        | 14q11.2         | -0.1641  | 0.001288 | 0.004639164 |
| HMGB4      | 1p35.1          | -0.16408 | 0.00129  | 0.004643892 |
| CCDC71L    | 7q22.3          | -0.16398 | 0.001299 | 0.004675844 |
| AMER3      | 2q21.1          | -0.16397 | 0.001299 | 0.004675844 |
| FANK1      | 10q26.2         | 0.163974 | 0.001299 | 0.004675844 |

|              |          |          |          |             |
|--------------|----------|----------|----------|-------------|
| UCKL1-AS1    | 20q13.33 | -0.16397 | 0.0013   | 0.00467605  |
| FNBP4        | 11p11.2  | -0.16394 | 0.001302 | 0.004683934 |
| OTX1         | 2p15     | 0.163902 | 0.001306 | 0.004696699 |
| LOC154761    | 7q35     | 0.163891 | 0.001307 | 0.004699459 |
| ABL2         | 1q25.2   | -0.16386 | 0.00131  | 0.004708923 |
| PTAFR        | 1p35.3   | 0.163837 | 0.001312 | 0.004715312 |
| ELOVL1       | 1p34.2   | 0.163784 | 0.001316 | 0.00473178  |
| TAF1C        | 16q24.1  | -0.16373 | 0.001321 | 0.004747556 |
| FCRLA        | 1q23.3   | 0.163716 | 0.001323 | 0.004751832 |
| IL22RA1      | 1p36.11  | -0.16372 | 0.001323 | 0.004751832 |
| NXPE4        | 11q23.2  | 0.163641 | 0.00133  | 0.00477495  |
| PSMD6        | 3p14.1   | -0.16364 | 0.00133  | 0.00477495  |
| FOCAD        | 9p21.3   | -0.16362 | 0.001331 | 0.004779712 |
| BTBD7        | 14q32.12 | 0.163605 | 0.001333 | 0.004784835 |
| THRB         | 3p24.2   | -0.16359 | 0.001334 | 0.004787242 |
| NDRG2        | 14q11.2  | 0.163591 | 0.001334 | 0.004787242 |
| PDZD4        | Xq28     | -0.16359 | 0.001334 | 0.004787242 |
| NAA80        | 3p21.31  | -0.16358 | 0.001335 | 0.004787242 |
| FAM114A2     | 5q33.2   | 0.163583 | 0.001335 | 0.004787242 |
| ZNF546       | 19q13.2  | -0.16358 | 0.001335 | 0.004787242 |
| CDIP1        | 16p13.3  | -0.16356 | 0.001337 | 0.004795083 |
| NPC1L1       | 7p13     | -0.16355 | 0.001338 | 0.004796683 |
| DUOXA1       | 15q21.1  | 0.163497 | 0.001343 | 0.004812719 |
| FAM167A      | 8p23.1   | 0.163474 | 0.001345 | 0.004819752 |
| TENT2        | 5q14.1   | 0.163455 | 0.001347 | 0.004825201 |
| YPEL4        | 11q12.1  | -0.16344 | 0.001348 | 0.004828083 |
| PRUNE2       | 9q21.2   | 0.163407 | 0.001351 | 0.004839569 |
| C16ORF86     | 16q22.1  | -0.16336 | 0.001356 | 0.00485513  |
| STK39        | 2q24.3   | 0.163352 | 0.001356 | 0.004856069 |
| EFCAB2       | 1q44     | -0.16334 | 0.001358 | 0.004859172 |
| POLR1E       | 9p13.2   | -0.16332 | 0.001359 | 0.0048643   |
| ABR          | 17p13.3  | 0.163293 | 0.001362 | 0.004872631 |
| PRSS55       | 8p23.1   | -0.16329 | 0.001362 | 0.004872631 |
| MRPL11       | 11q13.2  | -0.16328 | 0.001363 | 0.004874533 |
| CATSPERZ     | 11q13.1  | 0.163282 | 0.001363 | 0.004874533 |
| ZNF84        | 12q24.33 | -0.16328 | 0.001364 | 0.004875658 |
| TPTE2P6      | 13q12.12 | -0.16327 | 0.001364 | 0.004875658 |
| MEI1         | 22q13.2  | 0.163235 | 0.001367 | 0.004887327 |
| RPS4X        | Xq13.1   | -0.16323 | 0.001368 | 0.004887327 |
| ZNF445       | 3p21.31  | -0.16323 | 0.001368 | 0.004887761 |
| AGXT         | 2q37.3   | -0.16322 | 0.001369 | 0.004890347 |
| KLHL3        | 5q31.2   | -0.16318 | 0.001373 | 0.004903319 |
| MAPK7        | 17p11.2  | 0.163157 | 0.001375 | 0.00490973  |
| CCDC6        | 10q21.2  | 0.163148 | 0.001376 | 0.004910968 |
| AP3S2        | 15q26.1  | 0.163148 | 0.001376 | 0.004910968 |
| NSD2         | 4p16.3   | 0.163115 | 0.001379 | 0.004921331 |
| PPARD        | 6p21.31  | 0.163101 | 0.00138  | 0.004925058 |
| APOBEC3B     | 22q13.1  | -0.16307 | 0.001383 | 0.004933397 |
| STX2         | 12q24.33 | -0.16307 | 0.001383 | 0.004933397 |
| MED6         | 14q24.2  | -0.16306 | 0.001384 | 0.004934862 |
| FAM92A       | 8q22.1   | -0.16304 | 0.001386 | 0.004942923 |
| MRPL36       | 5p15.33  | -0.16303 | 0.001387 | 0.004945124 |
| TNFRSF10A    | 8p21.3   | 0.163016 | 0.001388 | 0.004948794 |
| EXOC4        | 7q33     | -0.163   | 0.001389 | 0.004952173 |
| LOC100133920 | 2q11.1   | -0.16298 | 0.001392 | 0.004959442 |
| CACUL1       | 10q26.11 | 0.162947 | 0.001395 | 0.004969539 |
| LEPROTL1     | 8p12     | 0.162945 | 0.001395 | 0.004969539 |
| PCM1         | 8p22     | 0.162939 | 0.001396 | 0.004970719 |

|             |          |          |          |             |
|-------------|----------|----------|----------|-------------|
| AREL1       | 14q24.3  | 0.162924 | 0.001397 | 0.004974997 |
| CGREF1      | 2p23.3   | -0.16292 | 0.001398 | 0.00497603  |
| KLHL21      | 1p36.31  | -0.16291 | 0.001399 | 0.004978393 |
| AFMID       | 17q25.3  | -0.1629  | 0.001399 | 0.004978837 |
| C9ORF50     | 9q34.11  | -0.1629  | 0.001399 | 0.004979462 |
| ZNF141      | 4p16.3   | -0.16287 | 0.001402 | 0.00498874  |
| PLEKHA3     | 2q31.2   | -0.16283 | 0.001406 | 0.005001846 |
| NKAIN4      | 20q13.33 | -0.16279 | 0.00141  | 0.005014323 |
| REEP4       | 8p21.3   | 0.162734 | 0.001415 | 0.005033146 |
| PRSS33      | 16p13.3  | -0.16272 | 0.001417 | 0.005036388 |
| ITGAL       | 16p11.2  | 0.162712 | 0.001418 | 0.005039116 |
| FAM49B      | 8q24.21  | -0.1627  | 0.001419 | 0.005043298 |
| AGBL1       | 15q25.3  | 0.162692 | 0.00142  | 0.005044372 |
| TMEM60      | 7q11.23  | -0.16268 | 0.001421 | 0.005048307 |
| USP46       | 4q12     | 0.162672 | 0.001422 | 0.00504943  |
| TMEM258     | 11q12.2  | -0.16266 | 0.001423 | 0.005052723 |
| CYP4F22     | 19p13.12 | 0.162647 | 0.001424 | 0.005056415 |
| MAN2C1      | 15q24.2  | -0.16264 | 0.001425 | 0.005057518 |
| DNAJC30     | 7q11.23  | -0.16264 | 0.001425 | 0.005057518 |
| CMTM6       | 3p22.3   | 0.162622 | 0.001426 | 0.00506209  |
| SNORA5C     | 7p13     | -0.1626  | 0.001428 | 0.005067911 |
| SETD1A      | 16p11.2  | -0.16258 | 0.00143  | 0.005073646 |
| GLUL        | 1q25.3   | 0.162568 | 0.001432 | 0.005078531 |
| ASF1A       | 6q22.31  | -0.16255 | 0.001433 | 0.005082744 |
| GP1BA       | 17p13.2  | 0.162544 | 0.001434 | 0.005084852 |
| HYKK        | 15q25.1  | -0.16254 | 0.001435 | 0.005085984 |
| EDAR        | 2q13     | -0.16252 | 0.001436 | 0.005090655 |
| MXD1        | 2p13.3   | 0.162484 | 0.00144  | 0.005103401 |
| RTP4        | 3q27.3   | 0.162477 | 0.001441 | 0.005104989 |
| TRHDE       | 12q21.1  | 0.162466 | 0.001442 | 0.005107724 |
| BTBD17      | 17q25.1  | 0.162457 | 0.001443 | 0.005109001 |
| TTC30B      | 2q31.2   | -0.16246 | 0.001443 | 0.005109001 |
| FZD7        | 2q33.1   | -0.16245 | 0.001443 | 0.005109005 |
| EGFL6       | Xp22.2   | -0.16245 | 0.001443 | 0.005110293 |
| DLX2        | 2q31.1   | -0.16244 | 0.001444 | 0.005111899 |
| PTEN        | 10q23.31 | 0.162434 | 0.001445 | 0.005113551 |
| AHSA1       | 14q24.3  | -0.16242 | 0.001447 | 0.0051184   |
| KAT7        | 17q21.33 | -0.16242 | 0.001447 | 0.0051184   |
| CDS2        | 20p12.3  | -0.16241 | 0.001447 | 0.005118404 |
| RBCK1       | 20p13    | -0.1624  | 0.001449 | 0.005123481 |
| EXTL1       | 1p36.11  | -0.16239 | 0.001449 | 0.005124467 |
| ERAS        | Xp11.23  | -0.16238 | 0.00145  | 0.00512593  |
| ADAMTS15    | 11q24.3  | 0.162363 | 0.001452 | 0.005132384 |
| OAS2        | 12q24.13 | 0.162338 | 0.001454 | 0.005139286 |
| MTX2        | 2q31.1   | -0.16234 | 0.001455 | 0.005139286 |
| SERAC1      | 6q25.3   | 0.162335 | 0.001455 | 0.005139286 |
| ZNF330      | 4q31.21  | 0.162329 | 0.001455 | 0.00514043  |
| SPTY2D1     | 11p15.1  | 0.162306 | 0.001458 | 0.005147961 |
| RCN2        | 15q24.3  | -0.16228 | 0.001461 | 0.005157195 |
| YPEL5       | 2p23.1   | -0.16227 | 0.001461 | 0.005157195 |
| PALM2-AKAP2 | 9q31.3   | -0.16227 | 0.001461 | 0.005157195 |
| LYAR        | 4p16.3   | -0.16227 | 0.001461 | 0.005157195 |
| INPP5E      | 9q34.3   | -0.16224 | 0.001464 | 0.005165511 |
| NPHP3       | 3q22.1   | -0.16223 | 0.001465 | 0.005169104 |
| NIPAL4      | 5q33.3   | -0.16222 | 0.001467 | 0.005173069 |
| ARL4D       | 17q21.31 | -0.16219 | 0.001469 | 0.005180959 |
| TMEM169     | 2q35     | -0.16217 | 0.001471 | 0.005188044 |
| ZNF414      | 19p13.2  | -0.16215 | 0.001474 | 0.005194993 |

|             |                |          |          |             |
|-------------|----------------|----------|----------|-------------|
| VAMP3       | 1p36.23        | 0.162082 | 0.00148  | 0.005217179 |
| VPREB3      | 22q11.23 22q11 | 0.16208  | 0.00148  | 0.005217179 |
| SEPTIN11    | 4q21.1         | 0.161997 | 0.001489 | 0.005246011 |
| PPP1R3F     | Xp11.23        | -0.16199 | 0.00149  | 0.00524772  |
| IL17D       | 13q12.11       | -0.16198 | 0.00149  | 0.005249429 |
| ASGR1       | 17p13.1        | -0.16195 | 0.001494 | 0.005258976 |
| THBS4       | 5q14.1         | -0.16195 | 0.001494 | 0.005258976 |
| ACADM       | 1p31.1         | 0.161943 | 0.001494 | 0.005260995 |
| LRFN3       | 19q13.12       | 0.161889 | 0.0015   | 0.00527934  |
| GCLC        | 6p12.1         | -0.16187 | 0.001502 | 0.005284037 |
| F8A1        | Xq28           | -0.16187 | 0.001502 | 0.005284037 |
| SUPT4H1     | 17q22          | -0.16187 | 0.001502 | 0.005284037 |
| S100A3      | 1q21.3         | -0.16187 | 0.001502 | 0.005284037 |
| TNFRSF6B    | 20q13.33       | 0.161847 | 0.001504 | 0.005290122 |
| IGFN1       | 1q32.1         | -0.16182 | 0.001507 | 0.005298062 |
| POF1B       | Xq21.1         | 0.161814 | 0.001508 | 0.005299826 |
| PIGW        | 17q12          | -0.16181 | 0.001508 | 0.005299826 |
| XPO4        | 13q12.11       | -0.16181 | 0.001508 | 0.005299826 |
| EBAG9       | 8q23.2         | -0.16171 | 0.001518 | 0.005333827 |
| CEBPA-DT    | 19q13.11       | -0.16168 | 0.001522 | 0.005344871 |
| YEATS2      | 3q27.1         | -0.16168 | 0.001522 | 0.005344871 |
| NUBPL       | 14q12          | -0.16167 | 0.001522 | 0.005344871 |
| TMEM230     | 20p13-p12.3    | -0.16167 | 0.001522 | 0.005344871 |
| ENTR1       | 9q34.3         | -0.16167 | 0.001523 | 0.005344871 |
| RASSF4      | 10q11.21       | -0.16164 | 0.001525 | 0.005354014 |
| DIS3        | 13q21.33       | -0.16162 | 0.001528 | 0.005362383 |
| GSDME       | 7p15.3         | -0.16161 | 0.001528 | 0.005362627 |
| ITGB1BP2    | Xq13.1         | -0.16158 | 0.001532 | 0.005373309 |
| CABIN1      | 22q11.23       | 0.16158  | 0.001532 | 0.005373309 |
| DNAJC12     | 10q21.3        | 0.161569 | 0.001533 | 0.005376322 |
| CD164L2     | 1p36.11        | 0.161527 | 0.001538 | 0.005390197 |
| FGF13       | Xq26.3-q27.1   | -0.16153 | 0.001538 | 0.005390197 |
| PCK1        | 20q13.31       | 0.161522 | 0.001538 | 0.00539108  |
| FLJ23867    | 1q25.2         | 0.161507 | 0.00154  | 0.005395373 |
| PLK3        | 1p34.1         | 0.161496 | 0.001541 | 0.005398795 |
| BORCS7      | 10q24.32       | 0.161492 | 0.001541 | 0.005399122 |
| UGT1A9      | 2q37.1         | 0.161467 | 0.001544 | 0.005407568 |
| DIPK1B      | 9q34.3         | -0.16144 | 0.001547 | 0.005416955 |
| BTF3L4      | 1p32.3         | -0.16142 | 0.001549 | 0.005423579 |
| TUBGCP3     | 13q34          | -0.16135 | 0.001556 | 0.005447799 |
| NOTCH3      | 19p13.12       | -0.16135 | 0.001557 | 0.005448448 |
| KRT222      | 17q21.2        | -0.16131 | 0.001561 | 0.005460891 |
| GPX1        | 3p21.31        | -0.16131 | 0.001561 | 0.005460891 |
| RASSF3      | 12q14.2        | 0.161296 | 0.001562 | 0.005464271 |
| ART5        | 11p15.4        | -0.16128 | 0.001563 | 0.00546833  |
| ARL4A       | 7p21.3         | -0.16128 | 0.001564 | 0.005468867 |
| ATP4A       | 19q13.12       | -0.16121 | 0.001571 | 0.005491737 |
| HIC2        | 22q11.21       | -0.16121 | 0.001571 | 0.005492411 |
| TAS2R20     | 12p13.2        | -0.16121 | 0.001572 | 0.005492411 |
| ZFP37       | 9q32           | -0.16121 | 0.001572 | 0.005492411 |
| GALK2       | 15q21.1-q21.2  | 0.161177 | 0.001575 | 0.005500673 |
| STXBP1      | 9q34.11        | 0.161177 | 0.001575 | 0.005500673 |
| FUT8-AS1    | 14q23.3        | 0.161176 | 0.001575 | 0.005500673 |
| REG1B       | 2p12           | 0.161133 | 0.001579 | 0.005515642 |
| BLOC1S3     | 19q13.32       | -0.16113 | 0.00158  | 0.005517353 |
| IGF2BP2-AS1 | 3q27.2         | -0.16112 | 0.001581 | 0.005519213 |
| PGBD2       | 1q44           | 0.161109 | 0.001582 | 0.005521749 |
| IGBP1P1     | 14q13.2        | -0.16105 | 0.001589 | 0.005543424 |



|           |               |          |          |             |
|-----------|---------------|----------|----------|-------------|
| CLSTN1    | 1p36.22       | 0.160993 | 0.001595 | 0.005563652 |
| DNAJC3    | 13q32.1       | 0.16097  | 0.001597 | 0.005571337 |
| JAM3      | 11q25         | -0.16097 | 0.001598 | 0.005571838 |
| POLR2H    | 3q27.1        | -0.16096 | 0.001598 | 0.005573646 |
| TANC2     | 17q23.2-q23.3 | 0.160954 | 0.001599 | 0.005574556 |
| SHLD2P1   | 10q11.22      | 0.160902 | 0.001605 | 0.005593561 |
| YAE1      | 7p14.1        | -0.1609  | 0.001605 | 0.005594474 |
| LIX1      | 5q15          | -0.16089 | 0.001606 | 0.005595042 |
| LRRC1     | 6p12.1        | 0.160861 | 0.001609 | 0.005606152 |
| GRAMD2A   | 15q23         | -0.16085 | 0.001611 | 0.005610684 |
| GAS2L2    | 17q12         | 0.160824 | 0.001613 | 0.005618333 |
| HTRA1     | 10q26.13      | -0.1608  | 0.001616 | 0.005626514 |
| HACD2     | 3q21.1        | 0.16077  | 0.001619 | 0.005637003 |
| SELENOT   | 3q25.1        | 0.160767 | 0.001619 | 0.005637262 |
| PLEKHG4   | 16q22.1       | -0.16075 | 0.001621 | 0.005643549 |
| PTPRCAP   | 11q13.2       | 0.160737 | 0.001623 | 0.005646871 |
| EPHA3     | 3p11.1        | -0.16072 | 0.001624 | 0.005651184 |
| NDUFS1    | 2q33.3        | 0.160711 | 0.001626 | 0.005654921 |
| GOLGA8DP  | 15q11.2       | -0.16069 | 0.001628 | 0.005661988 |
| ABRAXAS2  | 10q26.13      | 0.160687 | 0.001628 | 0.005661988 |
| NPY2R     | 4q32.1        | 0.160667 | 0.00163  | 0.005669005 |
| RALGAPA1  | 14q13.2       | 0.16066  | 0.001631 | 0.005670556 |
| PPP1R21   | 2p16.3        | -0.16061 | 0.001637 | 0.005689787 |
| SLC35B3   | 6p24.3        | 0.160605 | 0.001637 | 0.005689787 |
| TRIM65    | 17q25.1       | -0.16057 | 0.001642 | 0.005703971 |
| KLF6      | 10p15.2       | 0.160546 | 0.001644 | 0.005710664 |
| TXNDC17   | 17p13.1       | 0.160539 | 0.001645 | 0.005712598 |
| ITPKA     | 15q15.1       | 0.160518 | 0.001647 | 0.005719802 |
| MS4A15    | 11q12.2       | -0.16049 | 0.001651 | 0.005730788 |
| ENPP3     | 6q23.2        | -0.16044 | 0.001656 | 0.005748003 |
| CRISPLD1  | 8q21.13       | -0.16043 | 0.001657 | 0.005751714 |
| FEZ1      | 11q24.2       | -0.1604  | 0.00166  | 0.005760226 |
| PPM1D     | 17q23.2       | 0.160401 | 0.00166  | 0.005760239 |
| MSANTD1   | 4p16.3        | -0.1604  | 0.001661 | 0.005760883 |
| FIBIN     | 11p14.2       | -0.16036 | 0.001665 | 0.005774945 |
| DECR2     | 16p13.3       | -0.16036 | 0.001665 | 0.005774945 |
| CATSPERG  | 19q13.2       | 0.160328 | 0.001668 | 0.005784986 |
| C2ORF81   | 2p13.1        | -0.1603  | 0.001671 | 0.00579399  |
| TOMM40L   | 1q23.3        | 0.160253 | 0.001677 | 0.005812314 |
| KCNH2     | 7q36.1        | -0.16016 | 0.001687 | 0.005847742 |
| RPL23AP32 | 2p16.2        | -0.16016 | 0.001688 | 0.005848865 |
| FGFRL1    | 4p16.3        | -0.16014 | 0.00169  | 0.005853319 |
| ZNF76     | 6p21.31       | -0.16013 | 0.00169  | 0.005855126 |
| ANKRD30B  | 18p11.21      | 0.160132 | 0.001691 | 0.005855284 |
| WDR27     | 6q27          | -0.16011 | 0.001693 | 0.005861565 |
| DUSP22    | 6p25.3        | -0.1601  | 0.001695 | 0.005866714 |
| TMEM59L   | 19p13.11      | -0.16006 | 0.0017   | 0.005881912 |
| HIP1      | 7q11.23       | -0.16005 | 0.0017   | 0.005881912 |
| RTL5      | Xq13.1        | -0.16005 | 0.0017   | 0.00588248  |
| PLA2G4C   | 19q13.33      | -0.16002 | 0.001703 | 0.005892259 |
| GSN       | 9q33.2        | 0.160021 | 0.001704 | 0.005892259 |
| SLC4A5    | 2p13.1        | 0.160008 | 0.001705 | 0.005896572 |
| TPP2      | 13q33.1       | -0.15999 | 0.001707 | 0.005902265 |
| GEMIN7    | 19q13.32      | -0.15995 | 0.001712 | 0.005917461 |
| LINC02210 | 17q21.31      | -0.15995 | 0.001712 | 0.005917461 |
| MON1A     | 3p21.31       | -0.15994 | 0.001713 | 0.005917752 |
| ELF3      | 1q32.1        | 0.159941 | 0.001713 | 0.005917752 |
| PBOV1     | 6q23.3        | 0.15994  | 0.001713 | 0.005917752 |

|            |                 |          |          |             |
|------------|-----------------|----------|----------|-------------|
| RPS6KA6    | Xq21.1          | -0.15993 | 0.001714 | 0.005920787 |
| MYLPF      | 16p11.2         | -0.15992 | 0.001715 | 0.005920787 |
| ZC2HC1A    | 8q21.13         | -0.15992 | 0.001715 | 0.005920787 |
| GPRC6A     | 6q22.1          | 0.159918 | 0.001715 | 0.005920787 |
| UBR5       | 8q22.3          | -0.15992 | 0.001716 | 0.005920787 |
| NTN4       | 12q22           | 0.159917 | 0.001716 | 0.005920787 |
| TIAF1      | 17q11.2         | 0.159911 | 0.001716 | 0.005922011 |
| LZTS1      | 8p21.3          | -0.1599  | 0.001718 | 0.005925568 |
| CBFB       | 16q22.1         | -0.15988 | 0.00172  | 0.005932411 |
| PMS2P5     | 7q11.23         | -0.15987 | 0.001721 | 0.005934243 |
| C9ORF116   | 9q34.3          | 0.159853 | 0.001723 | 0.005941025 |
| CCDC8      | 19q13.32        | -0.15985 | 0.001723 | 0.005941025 |
| SRBD1      | 2p21            | 0.159846 | 0.001724 | 0.005941907 |
| EXOC7      | 17q25.1         | -0.15984 | 0.001724 | 0.005942876 |
| LOC388242  | 16p11.2         | 0.159833 | 0.001725 | 0.005945248 |
| STK10      | 5q35.1          | 0.15983  | 0.001726 | 0.005945248 |
| ARL5A      | 2q23.3          | -0.15981 | 0.001728 | 0.005951505 |
| FANCC      | 9q22.32         | 0.159806 | 0.001728 | 0.005952823 |
| FOXL2NB    | 3q22.3          | 0.1598   | 0.001729 | 0.005954246 |
| SLC22A25   | 11q12.3         | 0.159795 | 0.00173  | 0.005955596 |
| YOD1       | 1q32.1          | 0.159784 | 0.001731 | 0.005958775 |
| MED12      | Xq13.1          | -0.15977 | 0.001733 | 0.00596296  |
| TMPPE      | 3p22.3          | 0.159768 | 0.001733 | 0.005963365 |
| RNF133     | 7q31.32         | 0.159743 | 0.001736 | 0.005972081 |
| CD6        | 11q12.2         | 0.159724 | 0.001738 | 0.00597875  |
| EPS8L1     | 19q13.42        | 0.159722 | 0.001738 | 0.005978859 |
| LDHB       | 12p12.1         | -0.15971 | 0.00174  | 0.005982099 |
| ZNF322     | 6p22.2          | -0.15969 | 0.001742 | 0.005990223 |
| ZNF271P    | 18q12.2         | 0.159683 | 0.001743 | 0.005991368 |
| SLC1A7     | 1p32.3          | -0.15967 | 0.001745 | 0.005997153 |
| CRBN       | 3p26.2          | -0.15966 | 0.001745 | 0.005997347 |
| TMEM132C   | 12q24.32-q24.33 | -0.15965 | 0.001746 | 0.006000148 |
| PPIA       | 7p13            | -0.15964 | 0.001748 | 0.006004634 |
| GADD45GIP1 | 19p13.13        | -0.15959 | 0.001754 | 0.006023862 |
| FSD1L      | 9q31.2          | -0.15958 | 0.001755 | 0.006025503 |
| SCARF2     | 22q11.21        | -0.15958 | 0.001756 | 0.006027542 |
| RPL24      | 3q12.3          | -0.15957 | 0.001756 | 0.006027737 |
| CAP2       | 6p22.3          | -0.15956 | 0.001757 | 0.006031987 |
| PARS2      | 1p32.3          | -0.15956 | 0.001758 | 0.006031987 |
| YKT6       | 7p13            | -0.15954 | 0.00176  | 0.006037801 |
| SLF1       | 5q15            | 0.159472 | 0.001768 | 0.006065017 |
| DIRAS2     | 9q22.2          | -0.15947 | 0.001768 | 0.006065186 |
| DENND6B    | 22q13.33        | 0.159456 | 0.00177  | 0.006069468 |
| CATSPER2   | 15q15.3         | -0.15945 | 0.00177  | 0.006070102 |
| MED17      | 11q21           | -0.15944 | 0.001772 | 0.006073745 |
| SLC30A3    | 2p23.3          | -0.15943 | 0.001773 | 0.006075894 |
| PIK3C2G    | 12p12.3         | 0.15939  | 0.001778 | 0.00609243  |
| C16ORF54   | 16p11.2         | 0.15935  | 0.001783 | 0.006107289 |
| CNEP1R1    | 16q12.1         | -0.15935 | 0.001783 | 0.006107289 |
| MCEE       | 2p13.3          | 0.15934  | 0.001784 | 0.006109883 |
| PRXL2B     | 1p36.32         | 0.159328 | 0.001785 | 0.006113299 |
| STX3       | 11q12.1         | -0.15933 | 0.001785 | 0.006113299 |
| C6ORF226   | 6p21.1          | -0.15931 | 0.001788 | 0.006120696 |
| RIC8A      | 11p15.5         | -0.15928 | 0.001791 | 0.00612908  |
| SLC25A46   | 5q22.1          | 0.159275 | 0.001792 | 0.006131684 |
| NDUFB2-AS1 | 7q34            | -0.15924 | 0.001796 | 0.006143647 |
| GALNT11    | 7q36.1 7q36.1   | -0.15923 | 0.001797 | 0.006148937 |
| CDH17      | 8q22.1          | 0.159197 | 0.001801 | 0.006160666 |

|           |                 |          |          |             |
|-----------|-----------------|----------|----------|-------------|
| NDRG1     | 8q24.22         | 0.159158 | 0.001806 | 0.006174698 |
| TP53AIP1  | 11q24.3         | 0.159157 | 0.001806 | 0.006174698 |
| MROH8     | 20q11.23        | -0.15916 | 0.001806 | 0.006174698 |
| BRMS1     | 11q13.2         | -0.15912 | 0.001811 | 0.006190153 |
| CFAP58    | 10q25.1         | 0.159113 | 0.001811 | 0.006190585 |
| SSNA1     | 9q34.3          | -0.1591  | 0.001813 | 0.00619415  |
| PLXNB3    | Xq28            | -0.15904 | 0.00182  | 0.006218574 |
| GPBP1L1   | 1p34.1          | 0.159035 | 0.001821 | 0.006219768 |
| CDIPT     | 16p11.2         | -0.159   | 0.001825 | 0.00623189  |
| RAB24     | 5q35.3          | -0.15899 | 0.001826 | 0.006235076 |
| COX7C     | 5q14.3          | 0.158989 | 0.001827 | 0.006235822 |
| LOC440040 | 11p11.12        | -0.15899 | 0.001827 | 0.006236272 |
| SCAF11    | 12q12           | 0.158942 | 0.001832 | 0.006252729 |
| NOB1      | 16q22.1         | -0.15894 | 0.001832 | 0.006252729 |
| APOB      | 2p24.1          | -0.15892 | 0.001835 | 0.006261965 |
| KCNE4     | 2q36.1          | -0.15889 | 0.001839 | 0.00627386  |
| MCCC2     | 5q13.2          | 0.158884 | 0.00184  | 0.00627386  |
| PFKFB3    | 10p15.1         | 0.158877 | 0.00184  | 0.006275519 |
| IL23A     | 12q13.3         | -0.15886 | 0.001842 | 0.006279773 |
| TMEM101   | 17q21.31        | -0.15886 | 0.001842 | 0.006279773 |
| NDUFC1    | 4q31.1          | 0.15886  | 0.001843 | 0.006279773 |
| MED29     | 19q13.2         | -0.15881 | 0.001849 | 0.006301671 |
| MAP2      | 2q34            | -0.1588  | 0.00185  | 0.006304434 |
| TINAG     | 6p12.1          | -0.15878 | 0.001853 | 0.006310689 |
| SBDSP1    | 7q11.23         | -0.15877 | 0.001853 | 0.00631229  |
| BTG1      | 12q21.33        | 0.158757 | 0.001855 | 0.006317759 |
| RPL35     | 9q33.3          | -0.15871 | 0.001861 | 0.006335923 |
| TST       | 22q12.3         | 0.158703 | 0.001862 | 0.00633753  |
| ALDH4A1   | 1p36.13         | -0.1587  | 0.001862 | 0.00633753  |
| BHMT2     | 5q14.1          | -0.15869 | 0.001864 | 0.006342566 |
| TEKT5     | 16p13.13        | -0.1586  | 0.001875 | 0.006378627 |
| ENTPD6    | 20p11.21        | -0.1586  | 0.001876 | 0.006380399 |
| RELA      | 11q13.1         | -0.15858 | 0.001877 | 0.00638331  |
| CXCR6     | 3p21.31         | 0.158584 | 0.001877 | 0.00638331  |
| TMCC1     | 3q22.1          | -0.15858 | 0.001878 | 0.006383981 |
| SHISA5    | 3p21.31         | -0.15855 | 0.001881 | 0.00639408  |
| SH3GL1    | 19p13.3         | -0.15854 | 0.001882 | 0.006397528 |
| NSUN5P1   | 7q11.23         | -0.15853 | 0.001884 | 0.00640107  |
| ZFR       | 5p13.3          | -0.15852 | 0.001886 | 0.006406837 |
| AGBL2     | 11p11.2         | -0.15851 | 0.001886 | 0.006408092 |
| YPEL1     | 22q11.21-q11.22 | -0.15851 | 0.001887 | 0.006408092 |
| ELN       | 7q11.23         | -0.15845 | 0.001894 | 0.006431324 |
| FAM160A2  | 11p15.4         | 0.158433 | 0.001896 | 0.006438512 |
| TTC28     | 22q12.1         | -0.15836 | 0.001905 | 0.006466446 |
| KLF10     | 8q22.3          | -0.15836 | 0.001905 | 0.006466446 |
| BNIP2     | 15q22.2         | -0.15836 | 0.001906 | 0.006467313 |
| HSD17B6   | 12q13.3         | -0.15833 | 0.001909 | 0.006478842 |
| CRNKL1    | 20p11.23        | -0.15829 | 0.001914 | 0.006493203 |
| PYCR2     | 1q42.12         | -0.15827 | 0.001917 | 0.006503083 |
| PCNT      | 21q22.3         | 0.15826  | 0.001918 | 0.006505832 |
| ASCC3     | 6q16.3          | 0.158257 | 0.001919 | 0.006506234 |
| GPR18     | 13q32.3         | 0.158219 | 0.001924 | 0.006521482 |
| SYT1      | 12q21.2         | -0.15819 | 0.001927 | 0.006531511 |
| LOC155060 | 7q36.1          | -0.15817 | 0.001929 | 0.006539084 |
| PSG11     | 19q13.31        | -0.15815 | 0.001932 | 0.006547309 |
| GALNT4    | 12q21.33        | 0.158056 | 0.001945 | 0.006587746 |
| SCO2      | 22q13.33        | 0.158056 | 0.001945 | 0.006587746 |
| BRCC3     | Xq28            | -0.15802 | 0.001949 | 0.006602706 |

|           |                    |          |          |             |
|-----------|--------------------|----------|----------|-------------|
| FAM161A   | 2p15               | -0.15801 | 0.00195  | 0.006605018 |
| GM2A      | 5q33.1             | 0.157978 | 0.001955 | 0.006618773 |
| MZB1      | 5q31.2             | 0.157952 | 0.001958 | 0.006629098 |
| GNAS-AS1  | 20q13.32           | -0.15792 | 0.001963 | 0.006643551 |
| HPR       | 16q22.2            | 0.157914 | 0.001963 | 0.006644096 |
| EPST11    | 13q14.11           | -0.15788 | 0.001967 | 0.006654779 |
| CNIH3     | 1q42.12            | -0.15788 | 0.001967 | 0.006654779 |
| CERCAM    | 9q34.11            | -0.15786 | 0.001971 | 0.006666227 |
| SP140L    | 2q37.1             | 0.157845 | 0.001972 | 0.006670288 |
| INO80E    | 16p11.2            | -0.1578  | 0.001979 | 0.006690717 |
| CCDC25    | 8p21.1             | 0.157785 | 0.00198  | 0.006694696 |
| CCDC58    | 3q21.1             | -0.15778 | 0.001981 | 0.006696555 |
| FGF21     | 19q13.33           | -0.15773 | 0.001988 | 0.006717899 |
| AMELY     | Yp11.2             | -0.15772 | 0.001989 | 0.006721725 |
| PURA      | 5q31.3             | 0.157714 | 0.00199  | 0.006722141 |
| ZNF454    | 5q35.3             | -0.15769 | 0.001994 | 0.006733718 |
| SPECC1    | 17p11.2            | 0.157671 | 0.001995 | 0.00673915  |
| MON2      | 12q14.1            | 0.157664 | 0.001996 | 0.006740085 |
| NR0B2     | 1p36.11            | -0.15766 | 0.001996 | 0.006740085 |
| ULBP1     | 6q25.1             | -0.15766 | 0.001997 | 0.006741659 |
| DBF4B     | 17q21.31 17q21     | -0.15765 | 0.001998 | 0.006742006 |
| CCDC122   | 13q14.11           | -0.15765 | 0.001998 | 0.006742006 |
| ANKRD17   | 4q13.3             | 0.157647 | 0.001999 | 0.006743199 |
| OLAH      | 10p13              | -0.1576  | 0.002005 | 0.006764589 |
| OIP5-AS1  | 15q15.1            | 0.157574 | 0.002008 | 0.006773789 |
| PRORS1P   | 2p16.1             | -0.15755 | 0.002012 | 0.006783418 |
| C2CD5     | 12p12.1            | 0.157543 | 0.002013 | 0.006785646 |
| TMEM204   | 16p13.3            | -0.15753 | 0.002014 | 0.006787712 |
| CAMK4     | 5q22.1             | 0.157533 | 0.002014 | 0.006787712 |
| PINK1     | 1p36.12            | 0.157517 | 0.002016 | 0.006793837 |
| ARL10     | 5q35.2             | -0.15749 | 0.002019 | 0.006803936 |
| TEX35     | 1q25.2             | 0.15747  | 0.002022 | 0.006813033 |
| DHRSX     | Xp22.33 and Yp11.2 | -0.15746 | 0.002024 | 0.006815939 |
| RAPSN     | 11p11.2            | -0.15743 | 0.002028 | 0.006830382 |
| ERAL1     | 17q11.2            | -0.1574  | 0.002032 | 0.006842106 |
| CNTN3     | 3p12.3             | 0.157386 | 0.002034 | 0.006845699 |
| VAX1      | 10q25.3            | -0.15739 | 0.002034 | 0.006845699 |
| RAB8B     | 15q22.2            | 0.157376 | 0.002035 | 0.006848786 |
| LUZP4     | Xq23               | -0.15732 | 0.002042 | 0.006871236 |
| OAZ2      | 15q22.31           | -0.15732 | 0.002043 | 0.006871612 |
| PTH1R     | 3p21.31            | -0.15731 | 0.002044 | 0.006876416 |
| GNAI3     | 1p13.3             | 0.1573   | 0.002045 | 0.00687898  |
| PSMG2     | 18p11.21           | 0.157254 | 0.002052 | 0.006899291 |
| C1ORF216  | 1p34.3             | -0.15725 | 0.002053 | 0.006900306 |
| NMT1      | 17q21.31           | -0.15724 | 0.002053 | 0.006900306 |
| ZDHHC14   | 6q25.3             | 0.157242 | 0.002053 | 0.006900306 |
| FERMT2    | 14q22.1            | -0.15724 | 0.002054 | 0.006900306 |
| HSD11B2   | 16q22.1            | 0.157225 | 0.002056 | 0.006906878 |
| PREP      | 6q21               | 0.157213 | 0.002057 | 0.006910976 |
| CYP27A1   | 2q35               | -0.15719 | 0.002061 | 0.006920835 |
| LINC01548 | 21q22.11           | -0.15715 | 0.002066 | 0.006937162 |
| TAB3      | Xp21.2             | -0.15714 | 0.002068 | 0.00694152  |
| SRRM5     | 19q13.31           | -0.15714 | 0.002068 | 0.00694152  |
| TM2D3     | 15q26.3            | -0.15712 | 0.00207  | 0.006948327 |
| CBS       | 21q22.3            | -0.1571  | 0.002074 | 0.006958434 |
| CAB39     | 2q37.1             | 0.157089 | 0.002074 | 0.006960263 |
| TSGA10    | 2q11.2             | -0.15708 | 0.002076 | 0.00696469  |
| EPN2      | 17p11.2            | 0.157048 | 0.00208  | 0.006976819 |

|              |               |          |          |             |
|--------------|---------------|----------|----------|-------------|
| MBD1         | 18q21.1       | 0.157044 | 0.002081 | 0.006977552 |
| C10ORF88     | 10q26.13      | -0.157   | 0.002087 | 0.006998727 |
| LZIC         | 1p36.22       | 0.156992 | 0.002088 | 0.006999562 |
| EPHX2        | 8p21.2-p21.1  | 0.156973 | 0.002091 | 0.007007225 |
| LOC100130691 | 2q31.2        | -0.15695 | 0.002094 | 0.007016337 |
| GSTP1        | 11q13.2       | -0.15695 | 0.002094 | 0.007016337 |
| GIN51        | 20p11.21      | -0.15694 | 0.002096 | 0.007020426 |
| ULBP2        | 6q25.1        | 0.156935 | 0.002096 | 0.007020426 |
| TNPO1        | 5q13.2        | 0.156927 | 0.002097 | 0.007022707 |
| MGC57346     | 17q21.31      | -0.15692 | 0.002097 | 0.007022707 |
| GRAMD1C      | 3q13.31       | 0.156877 | 0.002104 | 0.007044006 |
| PPIH         | 1p34.2        | -0.15686 | 0.002107 | 0.007051309 |
| BANK1        | 4q24          | 0.156849 | 0.002108 | 0.007054774 |
| CLDN10       | 13q32.1       | -0.15683 | 0.00211  | 0.007059947 |
| AVL9         | 7p14.3        | -0.15683 | 0.00211  | 0.007059947 |
| CXCR5        | 11q23.3       | 0.156778 | 0.002118 | 0.007083194 |
| TGM6         | 20p13         | -0.15678 | 0.002118 | 0.007083194 |
| TGFB3        | 14q24.3       | -0.15678 | 0.002118 | 0.007083194 |
| NOA1         | 4q12          | 0.156767 | 0.002119 | 0.007086069 |
| ANAPC1       | 2q13          | -0.15675 | 0.002121 | 0.00709128  |
| RMND5A       | 2p11.2        | -0.15671 | 0.002127 | 0.007109916 |
| ST7-AS1      | 7q31.2        | -0.15668 | 0.002131 | 0.007122207 |
| RGS4         | 1q23.3        | -0.15667 | 0.002133 | 0.007125164 |
| RMND1        | 6q25.1        | -0.15666 | 0.002134 | 0.007128972 |
| ARF3         | 12q13.12      | 0.15663  | 0.002139 | 0.007143813 |
| ESYT3        | 3q22.3        | -0.15652 | 0.002154 | 0.007192478 |
| PRPF40A      | 2q23.3        | -0.15652 | 0.002154 | 0.007192478 |
| OS9          | 12q13.3-q14.1 | 0.156502 | 0.002157 | 0.007200451 |
| FGF14        | 13q33.1       | -0.1565  | 0.002157 | 0.007200451 |
| PKIB         | 6q22.31       | 0.156464 | 0.002163 | 0.007217096 |
| ADGRG7       | 3q12.2        | 0.156455 | 0.002164 | 0.007219982 |
| DXO          | 6p21.33       | -0.15644 | 0.002166 | 0.007224221 |
| MUCL1        | 12q13.2       | -0.15644 | 0.002166 | 0.007224221 |
| ITM2A        | Xq21.1        | 0.156413 | 0.00217  | 0.007236551 |
| HOXD12       | 2q31.1        | -0.15639 | 0.002173 | 0.007244301 |
| MIB2         | 1p36.33       | 0.156368 | 0.002176 | 0.007255776 |
| KMT5A        | 12q24.31      | 0.156358 | 0.002178 | 0.00725954  |
| GUSB         | 7q11.21       | 0.156345 | 0.00218  | 0.007264352 |
| FAM86B2      | 8p23.1        | 0.156306 | 0.002185 | 0.007282257 |
| CALD1        | 7q33          | -0.1563  | 0.002186 | 0.007283227 |
| EXT1         | 8q24.11       | 0.156274 | 0.00219  | 0.007295441 |
| SERTAD2      | 2p14          | 0.156271 | 0.00219  | 0.007295581 |
| EWSAT1       | 15q23         | -0.15622 | 0.002197 | 0.007317274 |
| CLDN15       | 7q22.1        | -0.15616 | 0.002206 | 0.007344969 |
| ZNF733P      | 7q11.21       | -0.15615 | 0.002208 | 0.007350489 |
| PLPP4        | 10q26.12      | -0.15615 | 0.002208 | 0.00735056  |
| TSEN15       | 1q25.3        | -0.15605 | 0.002223 | 0.007396278 |
| RGMA         | 15q26.1       | -0.15603 | 0.002225 | 0.007403912 |
| TAC3         | 12q13.3       | 0.155993 | 0.002231 | 0.007422094 |
| HIBCH        | 2q32.2        | 0.155991 | 0.002231 | 0.007422094 |
| MLXIPL       | 7q11.23       | -0.15599 | 0.002232 | 0.007422094 |
| KRT20        | 17q21.2       | 0.155978 | 0.002233 | 0.007426258 |
| ZNF883       | 9q32          | -0.15594 | 0.002239 | 0.007443497 |
| GPR142       | 17q25.1       | 0.155936 | 0.00224  | 0.007443747 |
| EMC4         | 15q14         | -0.15593 | 0.00224  | 0.007443747 |
| SDHD         | 11q23.1       | 0.155932 | 0.00224  | 0.007443785 |
| PPP1R1C      | 2q31.3-q32.1  | -0.15593 | 0.002241 | 0.007444179 |
| PTPN2        | 18p11.21      | 0.155926 | 0.002241 | 0.007444179 |

|           |          |          |          |             |
|-----------|----------|----------|----------|-------------|
| UGT2B11   | 4q13.2   | 0.15591  | 0.002243 | 0.007451048 |
| AKTIP     | 16q12.2  | -0.15591 | 0.002244 | 0.007451259 |
| KDM3A     | 2p11.2   | -0.1559  | 0.002246 | 0.007455757 |
| LRFN1     | 19q13.2  | -0.15589 | 0.002247 | 0.00745781  |
| OTOP2     | 17q25.1  | 0.15585  | 0.002252 | 0.007475443 |
| KARS      | 16q23.1  | -0.15584 | 0.002254 | 0.007479352 |
| PSORS1C1  | 6p21.33  | 0.155836 | 0.002254 | 0.007479352 |
| RPA1      | 17p13.3  | 0.155835 | 0.002255 | 0.007479352 |
| FDXR      | 17q25.1  | 0.155821 | 0.002257 | 0.007485252 |
| RPE       | 2q34     | -0.15577 | 0.002264 | 0.007508494 |
| EFHC1     | 6p12.2   | -0.15577 | 0.002265 | 0.007508494 |
| C2CD4C    | 19p13.3  | 0.155766 | 0.002265 | 0.007508628 |
| GAS1      | 9q21.33  | -0.15575 | 0.002267 | 0.007513599 |
| GSTM3     | 1p13.3   | -0.15575 | 0.002268 | 0.007514722 |
| ZNHIT1    | 7q22.1   | -0.15574 | 0.002268 | 0.007514722 |
| JPH2      | 20q13.12 | -0.15574 | 0.002269 | 0.007514722 |
| TGFB11I   | 16p11.2  | -0.15574 | 0.002269 | 0.007514722 |
| ODC1      | 2p25.1   | -0.15573 | 0.002271 | 0.007520648 |
| ABCC9     | 12p12.1  | -0.15569 | 0.002276 | 0.007535902 |
| FKBP1A    | 20p13    | -0.15567 | 0.002279 | 0.007544418 |
| CDK5R2    | 2q35     | -0.15566 | 0.002282 | 0.007552395 |
| NIPSNAP3B | 9q31.1   | -0.15565 | 0.002282 | 0.007553299 |
| BACE1     | 11q23.3  | -0.15564 | 0.002284 | 0.007557648 |
| ECM2      | 9q22.31  | -0.1556  | 0.00229  | 0.007576417 |
| BCAS4     | 20q13.13 | -0.15556 | 0.002296 | 0.00759512  |
| ARHGAP9   | 12q13.3  | 0.155554 | 0.002297 | 0.00759689  |
| SGCE      | 7q21.3   | -0.15555 | 0.002297 | 0.007597255 |
| CLASP2    | 3p22.3   | -0.15554 | 0.002298 | 0.007598959 |
| COL10A1   | 6q22.1   | -0.15554 | 0.002299 | 0.007598959 |
| USP51     | Xp11.21  | -0.15554 | 0.002299 | 0.007599709 |
| GRIK5     | 19q13.2  | -0.15553 | 0.0023   | 0.007600383 |
| MTURN     | 7p14.3   | -0.15553 | 0.0023   | 0.007600383 |
| POP4      | 19q12    | -0.15553 | 0.002301 | 0.007602263 |
| SURF4     | 9q34.2   | 0.155518 | 0.002302 | 0.007605224 |
| PRPS1L1   | 7p21.1   | -0.1555  | 0.002304 | 0.007610731 |
| KRBA1     | 7q36.1   | -0.1555  | 0.002305 | 0.007612378 |
| ARNTL     | 11p15.3  | 0.155481 | 0.002308 | 0.007619853 |
| MRPL9     | 1q21.3   | -0.15545 | 0.002312 | 0.007632901 |
| DCAF4L2   | 8q21.3   | -0.15543 | 0.002315 | 0.007639817 |
| DLX6-AS1  | 7q21.3   | -0.15543 | 0.002315 | 0.007639817 |
| MATN1     | 1p35.2   | -0.15543 | 0.002316 | 0.007639817 |
| TTC24     | 1q22     | 0.155427 | 0.002316 | 0.007640767 |
| ANKRD26   | 10p12.1  | -0.15542 | 0.002317 | 0.007643481 |
| ZNF426    | 19p13.2  | -0.15541 | 0.002319 | 0.007644976 |
| EFCAB1    | 8q11.21  | -0.15541 | 0.002319 | 0.007644976 |
| MICALCL   | 11p15.3  | 0.155409 | 0.002319 | 0.007644976 |
| LOC441666 | 10q11.21 | -0.15541 | 0.002319 | 0.007644992 |
| THNSL2    | 2p11.2   | -0.1554  | 0.002321 | 0.007647995 |
| SLC8B1    | 12q24.13 | 0.155371 | 0.002325 | 0.007660221 |
| CYP39A1   | 6p12.3   | -0.15535 | 0.002328 | 0.00766902  |
| CTCF      | 16q22.1  | 0.155349 | 0.002328 | 0.00766902  |
| ZNF391    | 6p22.1   | -0.15534 | 0.002329 | 0.007670373 |
| HDX       | Xq21.1   | -0.15534 | 0.00233  | 0.007670678 |
| FCN3      | 1p36.11  | -0.15534 | 0.00233  | 0.007670901 |
| USP16     | 21q21.3  | 0.155313 | 0.002334 | 0.007681738 |
| ZYX       | 7q34     | -0.15531 | 0.002334 | 0.007683202 |
| BICD2     | 9q22.31  | -0.1553  | 0.002336 | 0.007686085 |
| RRP7BP    | 22q13.2  | -0.15528 | 0.002338 | 0.007692572 |

|          |               |          |          |             |
|----------|---------------|----------|----------|-------------|
| VWA1     | 1p36.33       | -0.15527 | 0.002341 | 0.007700048 |
| UBR1     | 15q15.2       | 0.155253 | 0.002343 | 0.007706218 |
| EIF5AL1  | 10q22.3       | 0.155243 | 0.002344 | 0.007709875 |
| PCBP1    | 2p13.3        | -0.15518 | 0.002354 | 0.007740836 |
| MBOAT7   | 19q13.42      | 0.155154 | 0.002358 | 0.007752972 |
| GPA1     | 8q24.3        | -0.15513 | 0.002362 | 0.007763363 |
| EFCAB14  | 1p33          | 0.155127 | 0.002363 | 0.007764071 |
| ATP6V1H  | 8q11.23       | -0.15508 | 0.002369 | 0.007784404 |
| CKAP2L   | 2q14.1        | 0.155074 | 0.002371 | 0.007788537 |
| APCDD1L  | 20q13.32      | -0.15505 | 0.002375 | 0.00780165  |
| RPL26L1  | 5q35.1        | -0.15502 | 0.002379 | 0.007811459 |
| RHOH     | 4p14          | 0.155022 | 0.002379 | 0.007811459 |
| FAM214A  | 15q21.2-q21.3 | 0.154964 | 0.002388 | 0.007839839 |
| PDZD7    | 10q24.31      | -0.15494 | 0.002392 | 0.007852838 |
| RCBTB2   | 13q14.2       | -0.1549  | 0.002397 | 0.007868194 |
| N4BP2L2  | 13q13.1       | -0.1549  | 0.002398 | 0.007868194 |
| OR10P1   | 12q13.2       | 0.154887 | 0.0024   | 0.007874494 |
| CLCNKB   | 1p36.13       | -0.15488 | 0.002402 | 0.007876925 |
| OSBPL1A  | 18q11.2       | 0.154878 | 0.002402 | 0.007876925 |
| DLEU7    | 13q14.3       | -0.15487 | 0.002402 | 0.007877175 |
| P4HA3    | 11q13.4       | -0.15485 | 0.002405 | 0.007885449 |
| ADGRE4P  | 19p13.2       | 0.154854 | 0.002405 | 0.007885449 |
| SRC      | 20q11.23      | -0.15476 | 0.00242  | 0.007932517 |
| TAGLN2   | 1q23.2        | 0.154656 | 0.002437 | 0.007986056 |
| NLRP9    | 19q13.42      | 0.154643 | 0.002439 | 0.007991805 |
| KCTD7    | 7q11.21       | -0.15462 | 0.002442 | 0.008001303 |
| C20ORF96 | 20p13         | -0.1546  | 0.002446 | 0.0080125   |
| USP31    | 16p12.2       | -0.15455 | 0.002453 | 0.00803473  |
| CCDC112  | 5q22.3        | 0.154543 | 0.002455 | 0.008038755 |
| GARS     | 7p14.3        | -0.15453 | 0.002456 | 0.008042328 |
| IGFL1    | 19q13.32      | -0.1545  | 0.002461 | 0.008057187 |
| SORCS3   | 10q25.1       | -0.15445 | 0.00247  | 0.008083564 |
| PEPD     | 19q13.11      | -0.15444 | 0.002472 | 0.008088405 |
| LMBR1    | 7q36.3        | -0.15438 | 0.002482 | 0.008119129 |
| EFNA2    | 19p13.3       | 0.154376 | 0.002482 | 0.008119408 |
| ZNF785   | 16p11.2       | -0.15437 | 0.002483 | 0.008120375 |
| APTX     | 9p21.1        | -0.15435 | 0.002486 | 0.008128225 |
| KCTD18   | 2q33.1        | -0.15432 | 0.002492 | 0.008146657 |
| CRMP1    | 4p16.2        | -0.15429 | 0.002496 | 0.00815838  |
| PAM      | 5q21.1        | -0.15429 | 0.002496 | 0.00815838  |
| SPRYD3   | 12q13.13      | 0.154266 | 0.0025   | 0.008170298 |
| TPD52L1  | 6q22.31       | -0.15426 | 0.002501 | 0.008170695 |
| KIAA1109 | 4q27          | 0.154252 | 0.002502 | 0.008175128 |
| CGB3     | 19q13.33      | -0.15421 | 0.002509 | 0.008195708 |
| OPTN     | 10p13         | 0.154176 | 0.002515 | 0.008213611 |
| N4BP3    | 5q35.3        | 0.154156 | 0.002518 | 0.008222818 |
| CDR2L    | 17q25.1       | 0.154148 | 0.002519 | 0.008225653 |
| EXOSC3   | 9p13.2        | -0.15414 | 0.00252  | 0.008227792 |
| LCT      | 2q21.3        | -0.15413 | 0.002523 | 0.008233296 |
| BVES     | 6q21          | -0.15405 | 0.002536 | 0.00827576  |
| NFKBIE   | 6p21.1        | -0.15405 | 0.002536 | 0.00827576  |
| OGDH     | 7p13          | 0.154031 | 0.002539 | 0.008282112 |
| SHCBP1   | 16q11.2       | 0.154027 | 0.00254  | 0.008283326 |
| LY6E     | 8q24.3        | -0.15401 | 0.002542 | 0.008288871 |
| PNP      | 14q11.2       | 0.153984 | 0.002547 | 0.008303652 |
| CD2      | 1p13.1        | 0.153908 | 0.002559 | 0.008343802 |
| ANGEL2   | 1q32.3        | -0.15389 | 0.002562 | 0.008349849 |
| CDRT1    | 17p12         | 0.153888 | 0.002563 | 0.008352013 |

|           |              |          |          |             |
|-----------|--------------|----------|----------|-------------|
| ABCG2     | 4q22.1       | 0.153877 | 0.002565 | 0.008356712 |
| PLN       | 6q22.31      | -0.15386 | 0.002568 | 0.008366128 |
| NOX4      | 11q14.3      | -0.15384 | 0.002571 | 0.008374901 |
| MGAT1     | 5q35.3       | 0.153834 | 0.002572 | 0.008375896 |
| THBS2     | 6q27         | -0.15381 | 0.002576 | 0.008387157 |
| SMG6      | 17p13.3      | 0.153808 | 0.002576 | 0.008387446 |
| SERINC2   | 1p35.2       | 0.153805 | 0.002577 | 0.008387853 |
| PNPLA2    | 11p15.5      | 0.153788 | 0.00258  | 0.008395938 |
| FOXK2     | 17q25.3      | -0.15372 | 0.002591 | 0.008432692 |
| SRSF10    | 1p36.11      | -0.15366 | 0.002601 | 0.008463163 |
| ADCY2     | 5p15.31      | -0.15364 | 0.002604 | 0.00847189  |
| DAPL1     | 2q24.1       | -0.15362 | 0.002608 | 0.008483529 |
| EDC3      | 15q24.1      | -0.15361 | 0.002609 | 0.008484651 |
| MAB21L2   | 4q31.3       | -0.15359 | 0.002613 | 0.008496517 |
| C14ORF93  | 14q11.2      | -0.15358 | 0.002615 | 0.008502548 |
| FAM241A   | 4q25         | 0.153555 | 0.002619 | 0.008513604 |
| PPP4R3A   | 14q32.12     | 0.153538 | 0.002622 | 0.008521558 |
| KIAA1841  | 2p15         | -0.15351 | 0.002626 | 0.008533769 |
| CFL2      | 14q13.1      | -0.15351 | 0.002627 | 0.008533769 |
| LINC01096 | 4p15.33      | -0.15349 | 0.00263  | 0.008544938 |
| RAB11FIP1 | 8p11.23      | 0.15348  | 0.002632 | 0.008548637 |
| GNA12     | 7p22.3-p22.2 | -0.15346 | 0.002635 | 0.008557703 |
| RPL31P11  | 1q23.3       | -0.15342 | 0.002643 | 0.008580499 |
| KIAA1671  | 22q11.23     | 0.153371 | 0.002651 | 0.008605171 |
| DHRS4     | 14q11.2      | 0.153367 | 0.002651 | 0.00860583  |
| SLC39A3   | 19p13.3      | -0.15331 | 0.002661 | 0.008635409 |
| EPS8L3    | 1p13.3       | 0.153295 | 0.002664 | 0.008643587 |
| SPON2     | 4p16.3       | -0.15327 | 0.002668 | 0.008655293 |
| CEP55     | 10q23.33     | 0.153249 | 0.002672 | 0.008666649 |
| TCEANC    | Xp22.2       | -0.15324 | 0.002674 | 0.008671078 |
| ALX1      | 12q21.31     | -0.15323 | 0.002675 | 0.008673414 |
| GSTT2     | 22q11.23     | -0.15322 | 0.002677 | 0.008677886 |
| CTCFL     | 20q13.31     | -0.1532  | 0.00268  | 0.008686953 |
| NIT1      | 1q23.3       | 0.153188 | 0.002683 | 0.008694566 |
| EFTUD2    | 17q21.31     | -0.15313 | 0.002692 | 0.008724542 |
| KCNA3     | 1p13.3       | 0.153015 | 0.002713 | 0.008790195 |
| MRPS24    | 7p13         | -0.15298 | 0.002719 | 0.00880868  |
| FAM155B   | Xq13.1       | -0.15297 | 0.002721 | 0.008812232 |
| RNF214    | 11q23.3      | -0.15296 | 0.002722 | 0.00881539  |
| DBIL5P    | 17p13.3      | 0.152931 | 0.002728 | 0.008832565 |
| ANKRD10   | 13q34        | -0.15293 | 0.002728 | 0.008832993 |
| MYL10     | 7q22.1       | -0.15289 | 0.002735 | 0.008852145 |
| MTA1      | 14q32.33     | -0.15283 | 0.002746 | 0.008887056 |
| MLXIP     | 12q24.31     | 0.152824 | 0.002747 | 0.008888605 |
| EFCAB12   | 3q21.3       | 0.152751 | 0.00276  | 0.008929179 |
| PTPRN2    | 7q36.3       | 0.152739 | 0.002762 | 0.008934474 |
| KLHL15    | Xp22.11      | -0.15272 | 0.002765 | 0.008942407 |
| PPAN      | 19p13.2      | -0.15271 | 0.002767 | 0.008946842 |
| PMAIP1    | 18q21.32     | -0.1527  | 0.00277  | 0.008955536 |
| KCNAB2    | 1p36.31      | -0.15268 | 0.002772 | 0.008960901 |
| RAB30     | 11q14.1      | -0.15268 | 0.002773 | 0.008960901 |
| TMEM186   | 16p13.2      | -0.15268 | 0.002773 | 0.008960901 |
| PDHA1     | Xp22.12      | -0.15268 | 0.002773 | 0.008960901 |
| CYP4V2    | 4q35.1-q35.2 | 0.152664 | 0.002775 | 0.008966724 |
| TPSAB1    | 16p13.3      | 0.152651 | 0.002778 | 0.008972675 |
| GFRA3     | 5q31.2       | -0.15263 | 0.002781 | 0.008982805 |
| RABL2A    | 2q14.1       | -0.15263 | 0.002782 | 0.008984213 |
| RPL29     | 3p21.2       | -0.15261 | 0.002786 | 0.008994197 |



|           |               |          |          |             |
|-----------|---------------|----------|----------|-------------|
| ADA       | 20q13.12      | -0.15259 | 0.00279  | 0.009005561 |
| CDK3      | 17q25.1       | -0.15258 | 0.00279  | 0.009005561 |
| CD3D      | 11q23.3       | 0.152578 | 0.002791 | 0.009005561 |
| STAP1     | 4q13.2        | 0.152578 | 0.002791 | 0.009005561 |
| GPRC5A    | 12p13.1       | 0.152561 | 0.002794 | 0.009014121 |
| MMP12     | 11q22.2       | 0.152536 | 0.002799 | 0.009027161 |
| CORO2B    | 15q23         | -0.15253 | 0.0028   | 0.009030122 |
| RSU1P2    | 10q11.21      | 0.152487 | 0.002808 | 0.009052631 |
| DMPK      | 19q13.32      | -0.15248 | 0.002808 | 0.009053859 |
| TRNP1     | 1p36.11       | 0.152441 | 0.002816 | 0.009077081 |
| HIBADH    | 7p15.2        | -0.15241 | 0.002821 | 0.009091477 |
| TNS1      | 2q35          | -0.15239 | 0.002825 | 0.009101883 |
| SCML2     | Xp22.13       | -0.15239 | 0.002825 | 0.009101883 |
| ZNF331    | 19q13.42      | -0.15238 | 0.002826 | 0.009104418 |
| LRBA      | 4q31.3        | 0.152382 | 0.002827 | 0.009104418 |
| PRC1      | 15q26.1       | 0.152375 | 0.002828 | 0.009107148 |
| RNF6      | 13q12.13      | -0.15237 | 0.00283  | 0.009110769 |
| MIB1      | 18q11.2       | 0.152342 | 0.002834 | 0.009122724 |
| HIVEP3    | 1p34.2        | 0.152341 | 0.002834 | 0.009122724 |
| CASQ1     | 1q23.2        | -0.15233 | 0.002836 | 0.009126651 |
| PLEKHA2   | 8p11.22       | -0.15231 | 0.00284  | 0.009136732 |
| TIGIT     | 3q13.31       | 0.152289 | 0.002844 | 0.009149039 |
| LINC00479 | 21q22.3       | -0.15229 | 0.002844 | 0.009149802 |
| ODR4      | 1q31.1        | 0.15228  | 0.002846 | 0.009151396 |
| CCNI      | 4q21.1        | 0.152278 | 0.002846 | 0.009151396 |
| LAD1      | 1q32.1        | 0.152227 | 0.002855 | 0.009180221 |
| ALG3      | 3q27.1        | -0.15222 | 0.002856 | 0.009181052 |
| AMPD1     | 1p13.2        | 0.152183 | 0.002864 | 0.009203607 |
| WIPF2     | 17q21.2       | 0.152173 | 0.002865 | 0.009207585 |
| SRRM1     | 1p36.11       | 0.152171 | 0.002866 | 0.009207777 |
| CYP3A43   | 7q22.1        | -0.15212 | 0.002875 | 0.009234766 |
| STYXL1    | 7q11.23       | -0.15209 | 0.002882 | 0.009255508 |
| GBP2      | 1p22.2        | 0.152065 | 0.002885 | 0.00926628  |
| RNF208    | 9q34.3        | -0.15204 | 0.002889 | 0.009277511 |
| DIABLO    | 12q24.31      | -0.15203 | 0.002893 | 0.009287212 |
| NUDT7     | 16q23.1       | -0.15202 | 0.002894 | 0.009288181 |
| RPL32     | 3p25.2        | -0.15201 | 0.002895 | 0.009292515 |
| SNAP23    | 15q15.1-q15.2 | 0.151997 | 0.002898 | 0.009299829 |
| TPBG      | 6q14.1        | 0.151988 | 0.0029   | 0.009304039 |
| PTPRC     | 1q31.3-q32.1  | 0.151972 | 0.002903 | 0.009312269 |
| RTL10     | 22q11.21      | -0.15193 | 0.00291  | 0.009333349 |
| RANBP3L   | 5p13.2        | -0.15193 | 0.002911 | 0.009334192 |
| PMVK      | 1q21.3        | 0.151913 | 0.002914 | 0.009342849 |
| ELAC1     | 18q21.2       | 0.151899 | 0.002917 | 0.009350324 |
| CD52      | 1p36.11       | 0.151885 | 0.002919 | 0.009357293 |
| RDH10     | 8q21.11       | 0.151875 | 0.002921 | 0.00936068  |
| TUT7      | 9q21.33       | 0.151874 | 0.002921 | 0.00936068  |
| FAM9C     | Xp22.2        | -0.15187 | 0.002923 | 0.009363349 |
| HIST1H4J  | 6p22.1        | -0.15186 | 0.002924 | 0.009367908 |
| ITPRIPL1  | 2q11.2        | -0.15185 | 0.002925 | 0.009368175 |
| COX6B2    | 19q13.42      | 0.151851 | 0.002926 | 0.009368632 |
| PSG1      | 19q13.2       | -0.15184 | 0.002928 | 0.009374424 |
| KLHL38    | 8q24.13       | -0.15184 | 0.002928 | 0.009374424 |
| KLF17     | 1p34.1        | -0.1518  | 0.002935 | 0.009395471 |
| GON7      | 14q32.12      | 0.151781 | 0.002939 | 0.009404939 |
| KIF24     | 9p13.3        | 0.151778 | 0.002939 | 0.009405268 |
| PPP1R9A   | 7q21.3        | 0.151733 | 0.002948 | 0.009431137 |
| ABCB7     | Xq13.3        | -0.15171 | 0.002952 | 0.009441438 |

|            |               |          |          |             |
|------------|---------------|----------|----------|-------------|
| CD46       | 1q32.2        | -0.1517  | 0.002954 | 0.0094461   |
| SCARB2     | 4q21.1        | 0.151701 | 0.002954 | 0.00944643  |
| HMGCL      | 1p36.11       | 0.151691 | 0.002956 | 0.00945057  |
| UHRF1      | 19p13.3       | 0.151687 | 0.002957 | 0.009451689 |
| AMN        | 14q32.32      | 0.151644 | 0.002965 | 0.009476355 |
| KLHL5      | 4p14          | -0.15164 | 0.002966 | 0.009479584 |
| GPR137B    | 1q42.3        | 0.151608 | 0.002972 | 0.009494547 |
| HMCN1      | 1q25.3-q31.1  | -0.15161 | 0.002972 | 0.009494547 |
| ALG6       | 1p31.3        | 0.151601 | 0.002973 | 0.009496797 |
| MLH1       | 3p22.2        | -0.1516  | 0.002974 | 0.009497658 |
| PART1      | 5q12.1        | -0.15159 | 0.002976 | 0.009502812 |
| SSC5D      | 19q13.42      | -0.15158 | 0.002977 | 0.009502812 |
| NACC2      | 9q34.3        | 0.151559 | 0.002981 | 0.009516355 |
| PAIP2      | 5q31.2        | -0.1515  | 0.002992 | 0.009549126 |
| CBLL1      | 7q22.3        | -0.1515  | 0.002993 | 0.009550247 |
| ASB4       | 7q21.3        | -0.1515  | 0.002993 | 0.009550247 |
| XAGE2      | Xp11.22       | -0.15146 | 0.002999 | 0.009568447 |
| ZNF106     | 15q15.1       | 0.151454 | 0.003002 | 0.009573698 |
| ZBTB24     | 6q21          | -0.15144 | 0.003004 | 0.009579085 |
| COBLL1     | 2q24.3        | -0.15137 | 0.003018 | 0.009622528 |
| RNF41      | 12q13.3       | -0.15137 | 0.003018 | 0.009622528 |
| MYBPC1     | 12q23.2       | 0.151355 | 0.003021 | 0.009628715 |
| ETV4       | 17q21.31      | -0.15132 | 0.003028 | 0.009650208 |
| ABHD4      | 14q11.2       | 0.151278 | 0.003036 | 0.009673326 |
| ACVR1B     | 12q13.13      | -0.15127 | 0.003037 | 0.009676215 |
| SERHL2     | 22q13.2       | -0.15126 | 0.003039 | 0.009680033 |
| IWS1       | 2q14.3        | -0.15125 | 0.003041 | 0.009686156 |
| FRAT1      | 10q24.1       | 0.151202 | 0.003051 | 0.009714602 |
| ZBTB12     | 6p21.33       | -0.1512  | 0.003052 | 0.009717098 |
| ACSL1      | 4q35.1        | 0.151191 | 0.003053 | 0.009718651 |
| RPS9       | 19q13.42      | -0.15115 | 0.003062 | 0.009744752 |
| TMEM170B   | 6p24.2        | -0.15109 | 0.003073 | 0.009778498 |
| TRMU       | 22q13.31      | -0.15107 | 0.003078 | 0.009792395 |
| SHLD2      | 10q23.2       | 0.151054 | 0.00308  | 0.009798436 |
| CYP1B1-AS1 | 2p22.2        | 0.151044 | 0.003082 | 0.009802889 |
| CLTC       | 17q23.1       | 0.151029 | 0.003085 | 0.009810936 |
| FZD6       | 8q22.3        | -0.15102 | 0.003086 | 0.009814269 |
| TMEM14B    | 6p24.2        | -0.151   | 0.00309  | 0.009823586 |
| PGD        | 1p36.22       | 0.150982 | 0.003094 | 0.009836042 |
| TRO        | Xp11.21       | -0.15098 | 0.003095 | 0.009836115 |
| RFC2       | 7q11.23       | -0.15094 | 0.003102 | 0.009857314 |
| FYB1       | 5p13.1        | 0.150918 | 0.003107 | 0.009871857 |
| CFAP73     | 12q24.13      | 0.150914 | 0.003108 | 0.009871867 |
| VAC14      | 16q22.1-q22.2 | -0.15091 | 0.003108 | 0.009871867 |
| UQCR10     | 22q12.2       | 0.150899 | 0.003111 | 0.00987932  |
| CD1E       | 1q23.1        | 0.150887 | 0.003113 | 0.009885643 |
| RPUSD2     | 15q15.1       | -0.15085 | 0.003121 | 0.009908074 |
| PGM5P2     | 9p11.2        | -0.1508  | 0.003131 | 0.009939806 |
| FMC1       | 7q34          | -0.15079 | 0.003132 | 0.009941027 |
| LRWD1      | 7q22.1        | -0.15077 | 0.003138 | 0.009956507 |
| WFIKKN2    | 17q21.33      | -0.15073 | 0.003146 | 0.009980332 |
| KCTD5      | 16p13.3       | 0.150704 | 0.00315  | 0.009991609 |
| TRPM8      | 2q37.1        | -0.1507  | 0.00315  | 0.009991609 |
| TMEM123    | 11q22.2       | -0.1507  | 0.003151 | 0.009992101 |
| LRRIQ1     | 12q21.31      | -0.15066 | 0.00316  | 0.010018751 |
| ZMYND10    | 3p21.31       | 0.150623 | 0.003166 | 0.010038185 |
| C1QTNF12   | 1p36.33       | 0.150615 | 0.003168 | 0.010041992 |
| KAT14      | 20p11.23      | -0.15059 | 0.003172 | 0.010053127 |

|           |               |          |          |             |
|-----------|---------------|----------|----------|-------------|
| FASTKD2   | 2q33.3        | -0.15059 | 0.003173 | 0.010053127 |
| DUSP16    | 12p13.2       | -0.15057 | 0.003178 | 0.010069181 |
| SEMA7A    | 15q24.1       | -0.15053 | 0.003186 | 0.010091248 |
| DBF4      | 7q21.12       | -0.15052 | 0.003187 | 0.010091679 |
| VRK2      | 2p16.1        | -0.15052 | 0.003187 | 0.010091679 |
| FAM30A    | 14q32.33      | 0.150505 | 0.00319  | 0.010102133 |
| CPXM1     | 20p13         | -0.15049 | 0.003194 | 0.010109229 |
| BPIFA1    | 20q11.21      | -0.15049 | 0.003194 | 0.010109229 |
| PGA4      | 11q12.2       | 0.150454 | 0.003201 | 0.010130312 |
| CLN5      | 13q22.3       | -0.15045 | 0.003202 | 0.010133237 |
| IL12RB1   | 19p13.11      | 0.15044  | 0.003204 | 0.010135971 |
| ALDH2     | 12q24.12      | 0.150429 | 0.003206 | 0.010141924 |
| CDK13     | 7p14.1        | -0.15042 | 0.003207 | 0.010144459 |
| PHF6      | Xq26.2        | -0.15042 | 0.003208 | 0.010144459 |
| SLC5A11   | 16p12.1       | -0.15041 | 0.003209 | 0.010146693 |
| DDX51     | 12q24.33      | -0.15037 | 0.003218 | 0.010172643 |
| MYO1D     | 17q11.2       | 0.150359 | 0.00322  | 0.010179317 |
| CLEC17A   | 19p13.12      | 0.150332 | 0.003226 | 0.010195402 |
| SND1      | 7q32.1        | -0.15033 | 0.003227 | 0.010195772 |
| ATXN2L    | 16p11.2       | -0.15032 | 0.003228 | 0.010199366 |
| WDR83OS   | 19p13.13      | -0.15027 | 0.003238 | 0.010229582 |
| RUNX1     | 21q22.12      | -0.15027 | 0.003239 | 0.010230507 |
| SULT4A1   | 22q13.31      | -0.15026 | 0.00324  | 0.010231634 |
| BTD       | 3p25.1        | 0.150244 | 0.003244 | 0.010243082 |
| OLMALINC  | 10q24.31      | -0.1502  | 0.003254 | 0.010271858 |
| EIF5A     | 17p13.1       | 0.15019  | 0.003255 | 0.010275193 |
| ZNF214    | 11p15.4       | -0.15016 | 0.003261 | 0.010290715 |
| ADCK5     | 8q24.3        | -0.15014 | 0.003266 | 0.010305628 |
| MGST1     | 12p12.3       | 0.150137 | 0.003267 | 0.010305628 |
| EED       | 11q14.2       | -0.15012 | 0.00327  | 0.010314228 |
| PCGF2     | 17q12         | -0.15009 | 0.003277 | 0.010336207 |
| CCT5      | 5p15.2        | -0.15006 | 0.003283 | 0.010352064 |
| C10ORF67  | 10p12.2       | -0.15006 | 0.003283 | 0.010352064 |
| GLIPR1L1  | 12q21.2       | -0.15005 | 0.003285 | 0.010355996 |
| ARRDC4    | 15q26.2       | 0.150031 | 0.003289 | 0.010365458 |
| CCNL2     | 1p36.33       | -0.15003 | 0.003289 | 0.010365682 |
| NFKBIZ    | 3q12.3        | 0.150011 | 0.003293 | 0.01037547  |
| TDP2      | 6p22.3        | 0.150008 | 0.003294 | 0.010376265 |
| MAGEF1    | 3q27.1        | -0.15    | 0.003296 | 0.010382918 |
| POLA1     | Xp22.11-p21.3 | -0.14997 | 0.003302 | 0.010399588 |
| EYA4      | 6q23.2        | -0.14996 | 0.003305 | 0.010405648 |
| GTF2A1    | 14q31.1       | 0.149951 | 0.003306 | 0.010407625 |
| C16ORF87  | 16q11.2       | -0.14994 | 0.003309 | 0.01041616  |
| PURB      | 7p13          | -0.14993 | 0.00331  | 0.010416672 |
| PKD2      | 4q22.1        | -0.14992 | 0.003312 | 0.010421055 |
| WFDC13    | 20q13.12      | -0.14991 | 0.003314 | 0.010427455 |
| CYTH3     | 7p22.1        | -0.14988 | 0.003321 | 0.01044648  |
| TEDC2     | 16p13.3       | -0.14985 | 0.003326 | 0.010463241 |
| HSP90AB2P | 4p15.33       | -0.14983 | 0.003332 | 0.010478364 |
| SEC14L3   | 22q12.2       | 0.1498   | 0.003338 | 0.010495005 |
| KIF7      | 15q26.1       | -0.14978 | 0.003343 | 0.010509047 |
| HS3ST4    | 16p12.1       | -0.14977 | 0.003343 | 0.010509762 |
| MRM3      | 17p13.3       | 0.14976  | 0.003346 | 0.010517161 |
| PROB1     | 5q31.2        | 0.149747 | 0.003349 | 0.01052433  |
| PRR4      | 12p13.2       | -0.14973 | 0.003352 | 0.010532661 |
| PAGE1     | Xp11.23       | -0.14972 | 0.003355 | 0.010540886 |
| PLCB4     | 20p12.3-p12.2 | -0.1497  | 0.00336  | 0.01055224  |
| LOC256880 | 4q23          | -0.14969 | 0.00336  | 0.010552506 |

|           |          |          |          |             |
|-----------|----------|----------|----------|-------------|
| RPL7      | 8q21.11  | -0.14968 | 0.003363 | 0.010561111 |
| TSPAN5    | 4q23     | -0.14966 | 0.003367 | 0.010571792 |
| TAF5      | 22q13.32 | -0.14965 | 0.003369 | 0.010575799 |
| DNAJB5    | 9p13.3   | -0.14965 | 0.003371 | 0.010579371 |
| ZFP82     | 19q13.12 | -0.14963 | 0.003373 | 0.010585124 |
| SHPK      | 17p13.2  | 0.149604 | 0.00338  | 0.010604123 |
| RTP5      | 2q37.3   | 0.149586 | 0.003383 | 0.010614139 |
| LRRFIP2   | 3p22.2   | 0.149579 | 0.003385 | 0.010617407 |
| TRMT1     | 19p13.13 | -0.14957 | 0.003386 | 0.010620118 |
| FAM161B   | 14q24.3  | 0.149564 | 0.003388 | 0.010624287 |
| PTBP2     | 1p21.3   | -0.14955 | 0.003391 | 0.010631225 |
| PHF21A    | 11p11.2  | -0.14955 | 0.003392 | 0.010633799 |
| ADAL      | 15q15.3  | -0.14954 | 0.003393 | 0.010634756 |
| CAVIN1    | 17q21.2  | -0.14954 | 0.003394 | 0.010636163 |
| PRMT6     | 1p13.3   | -0.14952 | 0.003399 | 0.010648315 |
| LRRC31    | 3q26.2   | 0.149514 | 0.003399 | 0.010648315 |
| TAF3      | 1p13.2   | -0.1495  | 0.003401 | 0.010653127 |
| ATRX      | Xq21.1   | -0.14949 | 0.003404 | 0.010660188 |
| SIGLEC12  | 19q13.41 | 0.149488 | 0.003405 | 0.01066066  |
| SLC22A2   | 6q25.3   | -0.14947 | 0.003408 | 0.010669334 |
| LOC730668 | 22q13.31 | -0.14944 | 0.003415 | 0.010691145 |
| TMPO      | 12q23.1  | 0.149412 | 0.003421 | 0.010707884 |
| SNAPC2    | 19p13.2  | 0.149378 | 0.003429 | 0.010729139 |
| ZNF571    | 19q13.12 | -0.14938 | 0.003429 | 0.010729523 |
| ANKRD40CL | 17q21.33 | 0.149368 | 0.003431 | 0.010732996 |
| XXYLT1    | 3q29     | -0.14934 | 0.003438 | 0.010751791 |
| SMCO3     | 12p12.3  | -0.14933 | 0.003439 | 0.010754041 |
| KANSL1    | 17q21.31 | -0.1493  | 0.003446 | 0.010773953 |
| SLA2      | 20q11.23 | 0.149296 | 0.003447 | 0.010775372 |
| LINC00240 | 6p22.2   | -0.14927 | 0.003453 | 0.010792475 |
| THOC5     | 22q12.2  | -0.14927 | 0.003453 | 0.010793139 |
| NUMA1     | 11q13.4  | -0.14925 | 0.003457 | 0.010802255 |
| GNAI1     | 7q21.11  | 0.149232 | 0.003461 | 0.010811737 |
| AKR1E2    | 10p15.1  | -0.14923 | 0.003461 | 0.010811737 |
| SDC2      | 8q22.1   | -0.1492  | 0.003469 | 0.010833651 |
| COL25A1   | 4q25     | -0.14917 | 0.003474 | 0.010847573 |
| GATAD2A   | 19p13.11 | 0.149171 | 0.003474 | 0.010847642 |
| DHCR24    | 1p32.3   | 0.149128 | 0.003484 | 0.010875845 |
| DAPK3     | 19p13.3  | -0.14912 | 0.003486 | 0.01088115  |
| GSTA1     | 6p12.2   | 0.149113 | 0.003487 | 0.010882969 |
| ZNF254    | 19p12    | -0.14908 | 0.003494 | 0.010901909 |
| SLC35G2   | 3q22.3   | -0.14904 | 0.003503 | 0.010928502 |
| SH2D6     | 2p11.2   | 0.149038 | 0.003504 | 0.010929862 |
| LETM2     | 8p11.23  | 0.149029 | 0.003506 | 0.010934382 |
| RPL19     | 17q12    | -0.14901 | 0.00351  | 0.010945633 |
| CTAGE11P  | 13q22.2  | 0.149    | 0.003512 | 0.010950813 |
| ADGRE5    | 19p13.12 | 0.148985 | 0.003516 | 0.010959755 |
| C1ORF112  | 1q24.2   | -0.14898 | 0.003517 | 0.010962397 |
| RANBP2    | 2q13     | 0.148967 | 0.00352  | 0.010968941 |
| RPL32P3   | 3q21.3   | -0.14895 | 0.003523 | 0.010978941 |
| NBPF11    | 1q21.2   | -0.14894 | 0.003526 | 0.010984442 |
| COL27A1   | 9q32     | -0.14893 | 0.003527 | 0.010986189 |
| C2ORF73   | 2p16.2   | 0.148932 | 0.003527 | 0.010986627 |
| GRHL2     | 8q22.3   | -0.14891 | 0.003532 | 0.010996596 |
| SLC6A12   | 12p13.33 | 0.148913 | 0.003532 | 0.010996596 |
| COPS3     | 17p11.2  | 0.148883 | 0.003538 | 0.011015298 |
| RPL22L1   | 3q26.2   | 0.148864 | 0.003543 | 0.011026844 |
| PADI1     | 1p36.13  | -0.14885 | 0.003546 | 0.011035384 |

|              |                |          |          |             |
|--------------|----------------|----------|----------|-------------|
| LOC646999    | 7p14.1         | -0.14884 | 0.003548 | 0.011039396 |
| TBC1D12      | 10q23.33       | 0.148838 | 0.003549 | 0.011040403 |
| ZNF721       | 4p16.3         | 0.148829 | 0.003551 | 0.011043764 |
| GEMIN8       | Xp22.2         | -0.14883 | 0.003551 | 0.011043764 |
| NSUN3        | 3q11.2         | 0.148824 | 0.003552 | 0.01104476  |
| SERPINA6     | 14q32.13       | -0.14882 | 0.003553 | 0.011047158 |
| FAM219A      | 9p13.3         | -0.14881 | 0.003556 | 0.011054171 |
| TTC12        | 11q23.2        | -0.14878 | 0.003561 | 0.011068627 |
| LINC01138    | 1q21.2         | -0.14878 | 0.003562 | 0.011068968 |
| DSE          | 6q22.1         | -0.14876 | 0.003565 | 0.01107911  |
| CAMTA1       | 1p36.31-p36.23 | -0.14874 | 0.00357  | 0.011091323 |
| PHKG1        | 7p11.2         | -0.1487  | 0.003579 | 0.011117005 |
| ZNF100       | 19p12          | -0.14868 | 0.003585 | 0.011133907 |
| PXDNL        | 8q11.22-q11.23 | -0.14867 | 0.003586 | 0.011133907 |
| ZNF768       | 16p11.2        | -0.14867 | 0.003586 | 0.011133907 |
| AK9          | 6q21           | -0.14866 | 0.003588 | 0.011139176 |
| RPP38        | 10p13          | -0.14861 | 0.003601 | 0.011177052 |
| P2RY11       | 19p13.2        | 0.148593 | 0.003604 | 0.011185538 |
| EDN1         | 6p24.1         | -0.14858 | 0.003607 | 0.011193584 |
| CCDC190      | 1q23.3         | 0.148566 | 0.00361  | 0.011201012 |
| GCNT1        | 9q21.13        | 0.148564 | 0.003611 | 0.011201116 |
| DOC2B        | 17p13.3        | 0.148527 | 0.003619 | 0.011225463 |
| ZNF727       | 7q11.21        | -0.14848 | 0.003629 | 0.011255024 |
| PLAC9        | 10q22.3        | -0.14845 | 0.003636 | 0.01127504  |
| PBK          | 8p21.1         | 0.148444 | 0.003638 | 0.011279405 |
| ACE2         | Xp22.2         | -0.14843 | 0.003642 | 0.011289245 |
| PIK3CG       | 7q22.3         | 0.148424 | 0.003643 | 0.011289245 |
| REV1         | 2q11.2         | -0.14842 | 0.003643 | 0.011289245 |
| GHRH         | 20q11.23       | -0.14841 | 0.003645 | 0.011293492 |
| DCTN6        | 8p12           | 0.14839  | 0.003651 | 0.01130901  |
| VANGL1       | 1p13.1         | 0.148383 | 0.003652 | 0.011312503 |
| CPA3         | 3q24           | 0.148375 | 0.003654 | 0.011316525 |
| LOC100132287 | 1p36.33        | -0.14834 | 0.003662 | 0.01133786  |
| PGA3         | 11q12.2        | 0.14834  | 0.003662 | 0.01133786  |
| FNDC4        | 2p23.3         | -0.14833 | 0.003665 | 0.011343941 |
| CCDC183      | 9q34.3         | -0.14832 | 0.003666 | 0.01134729  |
| ARMH3        | 10q24.32       | 0.148311 | 0.003669 | 0.011353578 |
| ZNF526       | 19q13.2        | -0.14823 | 0.003688 | 0.011409567 |
| TESPA1       | 12q13.2        | 0.148227 | 0.003689 | 0.011410394 |
| TLR10        | 4p14           | 0.14822  | 0.00369  | 0.011413975 |
| PDLIM7       | 5q35.3         | -0.14819 | 0.003697 | 0.011434065 |
| AP1AR        | 4q25           | 0.148169 | 0.003702 | 0.01144694  |
| PRICKLE1     | 12q12          | -0.14816 | 0.003703 | 0.011448913 |
| POSTN        | 13q13.3        | -0.14814 | 0.003709 | 0.01146508  |
| TMEM182      | 2q12.1         | -0.14812 | 0.003712 | 0.011473769 |
| ZNF252P      | 8q24.3         | -0.14808 | 0.003723 | 0.01150436  |
| PCDHB12      | 5q31.3         | -0.14807 | 0.003726 | 0.011510564 |
| LNPEP        | 5q15           | 0.148064 | 0.003727 | 0.01151271  |
| SCARNA9L     | Xp22.12        | -0.14806 | 0.003728 | 0.011514682 |
| TPSB2        | 16p13.3        | 0.148051 | 0.00373  | 0.011517722 |
| PPM1K        | 4q22.1         | 0.14805  | 0.00373  | 0.011517722 |
| TMUB1        | 7q36.1         | -0.14804 | 0.003733 | 0.011526134 |
| TRIM28       | 19q13.43       | -0.14802 | 0.003738 | 0.011537376 |
| TGFBR1       | 9q22.33        | -0.14801 | 0.00374  | 0.011542504 |
| NRP2         | 2q33.3         | -0.148   | 0.003741 | 0.011543656 |
| NAXE         | 1q22           | -0.148   | 0.003741 | 0.011543656 |
| CFAP57       | 1p34.2         | 0.147977 | 0.003747 | 0.011560221 |
| SLAMF7       | 1q23.3         | 0.147945 | 0.003755 | 0.011581602 |

|           |                |          |          |             |
|-----------|----------------|----------|----------|-------------|
| TUBB2B    | 6p25.2         | -0.14794 | 0.003757 | 0.011585246 |
| RBM12     | 20q11.22       | -0.14793 | 0.003759 | 0.011589532 |
| TNN       | 1q25.1         | -0.14792 | 0.003761 | 0.011594473 |
| CEP63     | 3q22.2         | -0.14792 | 0.003761 | 0.011594473 |
| CLCA2     | 1p22.3         | 0.147885 | 0.003769 | 0.011616661 |
| PKDREJ    | 22q13.31       | 0.147821 | 0.003784 | 0.011661998 |
| SPOCK1    | 5q31.2         | -0.14777 | 0.003796 | 0.011694949 |
| TSPAN10   | 17q25.3        | -0.14777 | 0.003797 | 0.011696872 |
| C8ORF48   | 8p22           | -0.14774 | 0.003804 | 0.011717185 |
| HRAS      | 11p15.5        | -0.14773 | 0.003806 | 0.011721027 |
| ACSS3     | 12q21.31       | -0.14769 | 0.003815 | 0.011748    |
| LINC01184 | 5q23.3         | -0.14768 | 0.003819 | 0.011756462 |
| MOB3A     | 19p13.3        | 0.147676 | 0.003819 | 0.01175657  |
| FGF10     | 5p12           | -0.14763 | 0.00383  | 0.01178813  |
| CD1D      | 1q23.1         | 0.147616 | 0.003834 | 0.011797383 |
| MBNL1     | 3q25.1-q25.2   | 0.147612 | 0.003835 | 0.011798772 |
| CRYZL1    | 21q22.11       | 0.147593 | 0.003839 | 0.011810573 |
| CDC14B    | 9q22.32-q22.33 | 0.147591 | 0.00384  | 0.011810681 |
| GIMAP2    | 7q36.1         | 0.147586 | 0.003841 | 0.011812393 |
| RBBP7     | Xp22.2         | -0.14758 | 0.003842 | 0.011815227 |
| RGR       | 10q23.1        | -0.14758 | 0.003843 | 0.011815548 |
| RBPMS2    | 15q22.31       | -0.14757 | 0.003845 | 0.011817109 |
| SMIM12    | 1p34.3         | 0.147568 | 0.003845 | 0.011817109 |
| SLC9A3R1  | 17q25.1        | 0.147568 | 0.003845 | 0.011817109 |
| SIK1      | 21q22.3        | 0.147515 | 0.003858 | 0.011854461 |
| SCARNA7   | 3q25.33        | -0.14749 | 0.003865 | 0.011873363 |
| LOC284798 | 20p11.21       | -0.14748 | 0.003868 | 0.011879764 |
| ZC3H12B   | Xq11.2-q12     | -0.14746 | 0.003872 | 0.011890362 |
| MBTPS2    | Xp22.12        | -0.14742 | 0.00388  | 0.011914841 |
| KDM5C     | Xp11.22        | -0.14739 | 0.003889 | 0.011939096 |
| MIPOL1    | 14q13.3-q21.1  | 0.147385 | 0.00389  | 0.011939096 |
| PYM1      | 12q13.2        | 0.147385 | 0.00389  | 0.011939096 |
| RHBDF1    | 16p13.3        | -0.14735 | 0.003898 | 0.011962524 |
| MCFD2     | 2p21           | -0.14732 | 0.003907 | 0.011987779 |
| CKLF      | 16q21          | 0.14731  | 0.003908 | 0.011990165 |
| HHEX      | 10q23.33       | 0.147304 | 0.00391  | 0.011992551 |
| GLOD5     | Xp11.23        | -0.14728 | 0.003915 | 0.012006633 |
| TMOD2     | 15q21.2        | -0.14726 | 0.00392  | 0.012020742 |
| KATNAL1   | 13q12.3        | -0.14726 | 0.003921 | 0.012022808 |
| CHMP7     | 8p21.3         | 0.147254 | 0.003922 | 0.012023572 |
| CNTROB    | 17p13.1        | 0.147251 | 0.003923 | 0.012023685 |
| C6ORF58   | 6q22.33        | 0.147242 | 0.003925 | 0.012028565 |
| ZNF542P   | 19q13.43       | -0.14721 | 0.003933 | 0.01205218  |
| ADAR      | 1q21.3         | 0.147182 | 0.00394  | 0.012070502 |
| SLC10A2   | 13q33.1        | 0.14717  | 0.003943 | 0.012077858 |
|           | 4-Mar 2q35     | -0.14716 | 0.003946 | 0.012086625 |
| MRPS9     | 2q12.1         | -0.14715 | 0.003947 | 0.012087959 |
| KIF12     | 9q32           | -0.14715 | 0.003948 | 0.012087959 |
| TMEM42    | 3p21.31        | -0.14714 | 0.003949 | 0.01208971  |
| RPL14     | 3p22.1         | -0.14714 | 0.003951 | 0.012091374 |
| TCAM1P    | 17q23.3        | -0.14714 | 0.003951 | 0.012091374 |
| MRPS15    | 1p34.3         | -0.14709 | 0.003962 | 0.012122483 |
| IFRD2     | 3p21.31        | -0.14709 | 0.003964 | 0.012126535 |
| NEUROG3   | 10q22.1        | 0.147081 | 0.003965 | 0.012128407 |
| ALKBH8    | 11q22.3        | -0.14708 | 0.003965 | 0.012128407 |
| GCN1      | 12q24.23       | 0.147006 | 0.003984 | 0.012182602 |
| PAGE2B    | Xp11.21        | -0.147   | 0.003986 | 0.012188104 |
| CPT1C     | 19q13.33       | -0.14698 | 0.00399  | 0.012196676 |

|           |          |          |          |             |
|-----------|----------|----------|----------|-------------|
| AKAP4     | Xp11.22  | -0.14695 | 0.003997 | 0.012217881 |
| TDRD7     | 9q22.33  | 0.146918 | 0.004006 | 0.012242656 |
| POGK      | 1q24.1   | -0.14687 | 0.004019 | 0.012280708 |
| RBM33     | 7q36.3   | -0.14681 | 0.004033 | 0.012323192 |
| SCAND2P   | 15q25.2  | -0.14678 | 0.00404  | 0.012340126 |
| CNPY2     | 12q13.3  | -0.14678 | 0.004041 | 0.012342145 |
| PPP1R12B  | 1q32.1   | 0.146776 | 0.004042 | 0.012342145 |
| ZNF789    | 7q22.1   | -0.14677 | 0.004042 | 0.012342145 |
| ZNF717    | 3p12.3   | -0.14674 | 0.004051 | 0.01236778  |
| FMN1      | 15q13.3  | 0.146725 | 0.004055 | 0.012374441 |
| PCDH10    | 4q28.3   | -0.14672 | 0.004055 | 0.012374441 |
| XRRA1     | 11q13.4  | -0.14671 | 0.004058 | 0.012382165 |
| NXF5      | Xq22.1   | -0.14671 | 0.004058 | 0.012382466 |
| LMX1B     | 9q33.3   | -0.1467  | 0.00406  | 0.012385386 |
| C1ORF116  | 1q32.1   | 0.146693 | 0.004063 | 0.012391381 |
| DLX6      | 7q21.3   | -0.14668 | 0.004066 | 0.012400036 |
| DPY19L2P2 | 7q22.1   | -0.14666 | 0.004072 | 0.012414857 |
| RBM12B    | 8q22.1   | -0.14665 | 0.004074 | 0.01242187  |
| KLRC4     | 12p13.2  | 0.14663  | 0.004079 | 0.012431954 |
| MEG3      | 14q32.2  | -0.14663 | 0.00408  | 0.012431954 |
| TUBAL3    | 10p15.1  | 0.146627 | 0.00408  | 0.012431954 |
| MAGEL2    | 15q11.2  | -0.14662 | 0.004081 | 0.012432871 |
| PCYOX1L   | 5q32     | 0.146605 | 0.004085 | 0.012444856 |
| DPM2      | 9q34.11  | -0.1466  | 0.004086 | 0.012444899 |
| ATP5MG    | 11q23.3  | -0.14659 | 0.004089 | 0.012452407 |
| NIPAL2    | 8q22.2   | 0.146585 | 0.00409  | 0.012453491 |
| PILRB     | 7q22.1   | -0.14658 | 0.00409  | 0.012453491 |
| UNK       | 17q25.1  | -0.14658 | 0.004091 | 0.012454362 |
| ZNF277    | 7q31.1   | -0.14657 | 0.004094 | 0.012461799 |
| ANKZF1    | 2q35     | -0.14655 | 0.004098 | 0.012471334 |
| VLDLR-AS1 | 9p24.2   | -0.14653 | 0.004103 | 0.012485367 |
| RASA1     | 5q14.3   | 0.146476 | 0.004118 | 0.012529037 |
| BCKDHA    | 19q13.2  | 0.146471 | 0.00412  | 0.01253068  |
| BEST1     | 11q12.3  | -0.14645 | 0.004124 | 0.012542285 |
| ST6GAL1   | 3q27.3   | -0.14644 | 0.004128 | 0.012553911 |
| DUT       | 15q21.1  | -0.14642 | 0.004132 | 0.012564018 |
| LNX1      | 4q12     | 0.146399 | 0.004138 | 0.012580061 |
| TRAPPC11  | 4q35.1   | 0.146387 | 0.004141 | 0.012587643 |
| NPAS2     | 2q11.2   | -0.14638 | 0.004143 | 0.012591837 |
| SF3B2     | 11q13.1  | -0.14637 | 0.004146 | 0.01259722  |
| SDHAF4    | 6q13     | -0.14637 | 0.004147 | 0.012598872 |
| RPS13     | 11p15.1  | -0.14636 | 0.004148 | 0.012600524 |
| RNF227    | 17p13.1  | 0.146315 | 0.00416  | 0.012634289 |
| ZNF165    | 6p22.1   | 0.146298 | 0.004164 | 0.012645985 |
| PLEKHG2   | 19q13.2  | -0.14629 | 0.004167 | 0.012650663 |
| SPOP      | 17q21.33 | -0.14629 | 0.004167 | 0.012650663 |
| ZNF709    | 19p13.2  | -0.14628 | 0.00417  | 0.012658114 |
| SOX8      | 16p13.3  | 0.146219 | 0.004185 | 0.012699102 |
| SYNM      | 15q26.3  | -0.14622 | 0.004185 | 0.012699102 |
| ZNF256    | 19q13.43 | -0.14622 | 0.004186 | 0.012699102 |
| COL8A2    | 1p34.3   | -0.14621 | 0.004187 | 0.012700254 |
| UQCC3     | 11q12.3  | -0.14621 | 0.004188 | 0.01270209  |
| ATRIP     | 3p21.31  | -0.14619 | 0.004191 | 0.012710765 |
| MRPL15    | 8q11.23  | -0.14618 | 0.004194 | 0.012716537 |
| ATG4C     | 1p31.3   | 0.146178 | 0.004196 | 0.012720428 |
| NFKB2     | 10q24.32 | 0.146172 | 0.004197 | 0.012721027 |
| IL15      | 4q31.21  | 0.146172 | 0.004197 | 0.012721027 |
| SLC16A1   | 1p13.2   | 0.146164 | 0.0042   | 0.012725776 |

|           |          |          |          |             |
|-----------|----------|----------|----------|-------------|
| TOB2      | 22q13.2  | 0.14616  | 0.004201 | 0.012727103 |
| CYP1A1    | 15q24.1  | 0.14615  | 0.004203 | 0.012732577 |
| GTPBP4    | 10p15.3  | -0.14615 | 0.004204 | 0.012733826 |
| CLN8      | 8p23.3   | 0.146144 | 0.004205 | 0.012733826 |
| CCL5      | 17q12    | 0.14614  | 0.004206 | 0.012735155 |
| CSMD2     | 1p35.1   | -0.14612 | 0.004211 | 0.012747752 |
| DNM1P35   | 15q24.2  | -0.14612 | 0.004211 | 0.012747752 |
| USP37     | 2q35     | -0.1461  | 0.004216 | 0.012758131 |
| CCDC120   | Xp11.23  | -0.1461  | 0.004216 | 0.012758131 |
| ANGPT1    | 8q23.1   | -0.14609 | 0.004219 | 0.012764055 |
| C2        | 6p21.33  | -0.14609 | 0.004219 | 0.012764055 |
| FAM174B   | 15q26.1  | 0.146068 | 0.004225 | 0.012778437 |
| LINGO3    | 19p13.3  | -0.14606 | 0.004226 | 0.012781703 |
| NECAB1    | 8q21.3   | -0.14604 | 0.004232 | 0.012797861 |
| NUP37     | 12q23.2  | -0.14602 | 0.004238 | 0.012814437 |
| LDLRAD2   | 1p36.12  | -0.14601 | 0.004241 | 0.012817801 |
| TMEM68    | 8q12.1   | -0.14601 | 0.004241 | 0.012817801 |
| JTB       | 1q21.3   | 0.145895 | 0.004271 | 0.012905881 |
| ETV5      | 3q27.2   | 0.145868 | 0.004278 | 0.012925438 |
| PGLS      | 19p13.11 | -0.14586 | 0.00428  | 0.012929736 |
| MAGI1     | 3p14.1   | 0.145854 | 0.004282 | 0.012932259 |
| STON1     | 2p16.3   | -0.14585 | 0.004282 | 0.012932259 |
| RPUSD3    | 3p25.3   | -0.14583 | 0.004287 | 0.012945768 |
| EIF3M     | 11p13    | -0.14583 | 0.004288 | 0.012947118 |
| C1ORF127  | 1p36.22  | -0.14582 | 0.00429  | 0.012950941 |
| ZNF333    | 19p13.12 | -0.14582 | 0.004291 | 0.012951558 |
| CRB3      | 19p13.3  | 0.1458   | 0.004296 | 0.012964737 |
| CD226     | 18q22.2  | 0.145787 | 0.004299 | 0.012973159 |
| GEMIN5    | 5q33.2   | -0.14578 | 0.004302 | 0.012980113 |
| LINC00467 | 1q32.3   | 0.145774 | 0.004303 | 0.012980113 |
| CCDC154   | 16p13.3  | -0.14577 | 0.004304 | 0.012981342 |
| PRDX4     | Xp22.11  | -0.14577 | 0.004305 | 0.012982126 |
| URB1-AS1  | 21q22.11 | -0.14573 | 0.004313 | 0.013005024 |
| DPH3P1    | 20q13.33 | -0.14573 | 0.004314 | 0.013005024 |
| CDK10     | 16q24.3  | -0.14573 | 0.004314 | 0.013005024 |
| LEMD3     | 12q14.3  | -0.14572 | 0.004318 | 0.013012156 |
| LINC01600 | 6p25.2   | -0.14572 | 0.004318 | 0.013012156 |
| NELFE     | 6p21.33  | -0.14569 | 0.004324 | 0.013028483 |
| CPB2      | 13q14.13 | -0.14568 | 0.004329 | 0.013041014 |
| MCM8      | 20p12.3  | -0.14567 | 0.004332 | 0.013047293 |
| CCL15     | 17q12    | 0.145648 | 0.004337 | 0.013061085 |
| MRV1      | 11p15.4  | -0.14564 | 0.00434  | 0.013067003 |
| ING1      | 13q34    | -0.14562 | 0.004344 | 0.013076042 |
| TRIM31    | 6p22.1   | 0.145622 | 0.004344 | 0.013076042 |
| CERS1     | 19p13.11 | -0.14558 | 0.004355 | 0.013108659 |
| MNT       | 17p13.3  | 0.145547 | 0.004364 | 0.013133232 |
| BGN       | Xq28     | -0.14553 | 0.004369 | 0.013146577 |
| DTX3L     | 3q21.1   | 0.145523 | 0.004371 | 0.013149358 |
| CARMN     | 5q32     | -0.14551 | 0.004374 | 0.013156364 |
| ARL6IP5   | 3p14.1   | 0.145508 | 0.004375 | 0.013157391 |
| IL6ST     | 5q11.2   | 0.145493 | 0.004379 | 0.01316701  |
| NSRP1     | 17q11.2  | -0.14549 | 0.004379 | 0.01316701  |
| ROBO1     | 3p12.3   | -0.14548 | 0.004383 | 0.013176508 |
| XRCC2     | 7q36.1   | -0.14547 | 0.004385 | 0.01317859  |
| CTNND1    | 11q12.1  | 0.145454 | 0.00439  | 0.0131918   |
| ANKRD6    | 6q15     | -0.14541 | 0.004401 | 0.013222887 |
| MTMR1     | Xq28     | -0.14537 | 0.004411 | 0.013253165 |
| ECD       | 10q22.2  | -0.14537 | 0.004414 | 0.013258097 |



|            |                 |          |          |             |
|------------|-----------------|----------|----------|-------------|
| SYNPR      | 3p14.2          | -0.14533 | 0.004422 | 0.013282006 |
| AKT2       | 19q13.2         | -0.14532 | 0.004425 | 0.013289471 |
| CUTALP     | 9q33.2          | -0.14532 | 0.004427 | 0.01329317  |
| B4GALT6    | 18q12.1         | 0.145288 | 0.004435 | 0.013312857 |
| SLC30A4    | 15q21.1 15q21.1 | 0.145288 | 0.004435 | 0.013312857 |
| ITPKC      | 19q13.2         | -0.14528 | 0.004437 | 0.013314853 |
| PCOLCE     | 7q22.1          | -0.14528 | 0.004437 | 0.013314853 |
| METTL21EP  | 13q33.1         | -0.14528 | 0.004439 | 0.013314853 |
| SASH3      | Xq26.1          | 0.145276 | 0.004439 | 0.013314853 |
| ATP5PO     | 21q22.11        | 0.145214 | 0.004456 | 0.013363888 |
| CCDC74B    | 2q21.1          | -0.14521 | 0.004457 | 0.01336564  |
| INKA2      | 1p13.2          | 0.145194 | 0.004461 | 0.013376327 |
| MAP3K12    | 12q13.13        | -0.14517 | 0.004469 | 0.013397421 |
| PWP1       | 12q23.3         | -0.14516 | 0.004471 | 0.013403477 |
| SEL1L3     | 4p15.2          | 0.145141 | 0.004476 | 0.013414736 |
| LENG1      | 19q13.42        | -0.14513 | 0.004478 | 0.013418467 |
| DACT2      | 6q27            | -0.14512 | 0.004481 | 0.013426548 |
| DLGAP5     | 14q22.3         | 0.145068 | 0.004496 | 0.013469246 |
| ZCCHC14    | 16q24.2         | -0.14504 | 0.004504 | 0.013490644 |
| ZNF420     | 19q13.12        | -0.14503 | 0.004506 | 0.013496017 |
| ZNF146     | 19q13.12        | -0.14503 | 0.004508 | 0.013499408 |
| WASHC5     | 8q24.13         | -0.14502 | 0.00451  | 0.0135028   |
| MT4        | 16q13           | -0.14501 | 0.004513 | 0.01351094  |
| FMN2       | 1q43            | -0.14498 | 0.004521 | 0.01353161  |
| SH2D1A     | Xq25            | 0.144929 | 0.004535 | 0.013572169 |
| RTBDN      | 19p13.13        | 0.144925 | 0.004536 | 0.013572912 |
| UBN2       | 7q34            | -0.14492 | 0.004538 | 0.013575855 |
| CDAN1      | 15q15.2         | -0.14491 | 0.004539 | 0.013577962 |
| SIRT3      | 11p15.5         | -0.14491 | 0.00454  | 0.013577962 |
| S100A4     | 1q21.3          | -0.14488 | 0.00455  | 0.013605868 |
| C1GALT1C1  | Xq24            | -0.14485 | 0.004557 | 0.013624004 |
| MS4A2      | 11q12.1         | 0.144841 | 0.00456  | 0.013631574 |
| TCP11L1    | 11p13           | 0.144839 | 0.00456  | 0.013631574 |
| SLC5A10    | 17p11.2         | 0.144831 | 0.004563 | 0.013636475 |
| TRIM59     | 3q25.33         | -0.14481 | 0.00457  | 0.013654807 |
| MAP1B      | 5q13.2          | -0.14478 | 0.004577 | 0.013674826 |
| RWDD1      | 6q22.1          | -0.14476 | 0.004582 | 0.013688479 |
| PRL        | 6p22.3          | -0.14473 | 0.00459  | 0.013711234 |
| KLHL10     | 17q21.2         | -0.14473 | 0.004592 | 0.01371265  |
| USP7       | 16p13.2         | -0.14472 | 0.004594 | 0.013714658 |
| CUL7       | 6p21.1          | -0.14472 | 0.004594 | 0.013714658 |
| DKKL1      | 19q13.33        | -0.14471 | 0.004598 | 0.013724342 |
| MAP3K7CL   | 21q21.3         | -0.1447  | 0.004601 | 0.013729557 |
| PIH1D2     | 11q23.1         | -0.1447  | 0.004601 | 0.013729557 |
| EXD1       | 15q15.1         | -0.14468 | 0.004604 | 0.013738093 |
| FAM83A-AS1 | 8q24.13         | 0.144669 | 0.004609 | 0.013749329 |
| CD19       | 16p11.2         | 0.144656 | 0.004612 | 0.013758216 |
| SSTR3      | 22q13.1         | 0.144652 | 0.004614 | 0.013759752 |
| MGC12916   | 17p12           | 0.14461  | 0.004625 | 0.013793101 |
| ABCC5      | 3q27.1          | -0.14459 | 0.004633 | 0.013812513 |
| LSG1       | 3q29            | -0.14457 | 0.004636 | 0.013821316 |
| LRRN4CL    | 11q12.3         | -0.14457 | 0.004638 | 0.013825152 |
| SLF2       | 10q24.31        | 0.144562 | 0.004639 | 0.013826225 |
| DIRC1      | 2q32.2          | -0.14453 | 0.004647 | 0.013847579 |
| TSPAN33    | 7q32.1          | -0.14453 | 0.004649 | 0.013850863 |
| ZNF492     | 19p12           | -0.14453 | 0.00465  | 0.013851494 |
| PACRG      | 6q26            | -0.1445  | 0.004656 | 0.01386775  |
| NSF        | 17q21.31        | 0.144501 | 0.004657 | 0.01386775  |

|            |                 |          |          |             |
|------------|-----------------|----------|----------|-------------|
| PHF2P1     | 13q12.11        | -0.14449 | 0.00466  | 0.013874558 |
| ZNF90      | 19p12           | -0.14449 | 0.004661 | 0.013876741 |
| PLSCR4     | 3q24            | 0.144482 | 0.004662 | 0.013878373 |
| AHRR       | 5p15.33         | 0.144453 | 0.004671 | 0.013901459 |
| RNFT2      | 12q24.22        | -0.14444 | 0.004675 | 0.013911766 |
| SRSF7      | 2p22.1          | -0.14444 | 0.004676 | 0.013911766 |
| F13A1      | 6p25.1          | -0.14442 | 0.004679 | 0.013919516 |
| KRT33A     | 17q21.2         | -0.1444  | 0.004687 | 0.013940186 |
| CGNL1      | 15q21.3         | -0.14439 | 0.00469  | 0.013949128 |
| ZNF404     | 19q13.31        | -0.14437 | 0.004693 | 0.013956154 |
| SH3PXD2B   | 5q35.1          | -0.14437 | 0.004695 | 0.013958725 |
| KRTAP10-11 | 21q22.3         | -0.14436 | 0.004697 | 0.013963504 |
| CCDC12     | 3p21.31         | -0.14433 | 0.004707 | 0.013990401 |
| RTCB       | 22q12.3         | 0.144323 | 0.004708 | 0.013990401 |
| STBD1      | 4q21.1          | 0.144323 | 0.004708 | 0.013990401 |
| ZNF300P1   | 5q33.1          | -0.14431 | 0.004712 | 0.013999488 |
| SNX32      | 11q13.1         | -0.14428 | 0.00472  | 0.014019634 |
| LCK        | 1p35.2          | 0.144262 | 0.004726 | 0.014037096 |
| B3GNT5     | 3q27.1          | 0.144239 | 0.004733 | 0.014054435 |
| TRIM8      | 10q24.32        | 0.144165 | 0.004755 | 0.014116942 |
| SNORA8     | 11q21           | -0.14409 | 0.004776 | 0.014177625 |
| CCDC59     | 12q21.31        | -0.14409 | 0.004777 | 0.014180421 |
| RBAK       | 7p22.1          | -0.14407 | 0.004782 | 0.014192639 |
| CSRNP1     | 3p22.2          | 0.144064 | 0.004784 | 0.014196568 |
| MMP13      | 11q22.2         | -0.14402 | 0.004798 | 0.014235139 |
| MTMR2      | 11q21           | -0.14401 | 0.004802 | 0.014244094 |
| DENND4A    | 15q22.31        | 0.143989 | 0.004807 | 0.01425674  |
| TRIM72     | 16p11.2         | 0.14398  | 0.004809 | 0.014261992 |
| LCORL      | 4p15.31         | 0.143959 | 0.004815 | 0.01427865  |
| CTAGE15    | 7q35            | 0.143946 | 0.004819 | 0.014288282 |
| SPOPL      | 2q22.1          | 0.143937 | 0.004822 | 0.01429357  |
| 1-Mar      | 1q41            | 0.143925 | 0.004826 | 0.014302648 |
| DKK2       | 4q25            | -0.14389 | 0.004835 | 0.014328805 |
| IL1RL1     | 2q12.1          | 0.143849 | 0.004848 | 0.014363381 |
| IL10RA     | 11q23.3         | 0.143846 | 0.004849 | 0.014363381 |
| COQ9       | 16q21           | 0.143846 | 0.004849 | 0.014363381 |
| RPP38-DT   | 10p13           | -0.14382 | 0.004857 | 0.014385028 |
| C11ORF87   | 11q22.3         | -0.14382 | 0.004858 | 0.014385028 |
| LY6G5C     | 6p21.33         | -0.14381 | 0.004858 | 0.014385028 |
| PCYOX1     | 2p13.3          | -0.14381 | 0.004861 | 0.014390151 |
| FAR2P1     | 2q21.1          | -0.14376 | 0.004875 | 0.014428965 |
| TBC1D8B    | Xq22.3          | 0.143739 | 0.004881 | 0.014445335 |
| NACA2      | 17q23.2         | -0.14373 | 0.004883 | 0.014448151 |
| STIL       | 1p33            | 0.143731 | 0.004883 | 0.014448151 |
| CACNB2     | 10p12.33-p12.31 | 0.143707 | 0.004891 | 0.014468051 |
| TMEM252    | 9q21.11         | -0.1437  | 0.004893 | 0.01447185  |
| SCN3B      | 11q24.1         | -0.1437  | 0.004894 | 0.01447185  |
| RGL4       | 22q11.23        | 0.143695 | 0.004894 | 0.01447185  |
| SOHLH1     | 9q34.3          | -0.14369 | 0.004895 | 0.014472221 |
| FAHD2CP    | 2q11.2          | -0.14368 | 0.0049   | 0.014484795 |
| MAP3K9     | 14q24.2         | 0.143658 | 0.004906 | 0.014498592 |
| RFX8       | 2q11.2          | -0.14365 | 0.004909 | 0.014507608 |
| LUM        | 12q21.33        | -0.14363 | 0.004913 | 0.014517758 |
| GHRLOS     | 3p25.3          | -0.14362 | 0.004916 | 0.014524079 |
| HIST2H2BF  | 1q21.2          | -0.14361 | 0.004919 | 0.014531261 |
| TXNDC12    | 1p32.3          | -0.14361 | 0.00492  | 0.014531313 |
| ERI3       | 1p34.1          | -0.14361 | 0.004921 | 0.014531313 |
| SLC31A2    | 9q32            | 0.143596 | 0.004924 | 0.014538795 |

|              |                 |          |          |             |
|--------------|-----------------|----------|----------|-------------|
| PHF20L1      | 8q24.22         | -0.14357 | 0.004931 | 0.014556107 |
| TMPRSS11E    | 4q13.2          | -0.14357 | 0.004932 | 0.014557276 |
| GREB1L       | 18q11.1-q11.2   | -0.14356 | 0.004935 | 0.014565106 |
| TAF11        | 6p21.31         | -0.14355 | 0.004938 | 0.014571073 |
| SPAG16       | 2q34            | -0.14351 | 0.00495  | 0.014604263 |
| DENND1C      | 19p13.3         | 0.143502 | 0.004953 | 0.014610612 |
| P3H1         | 1p34.2          | -0.14349 | 0.004956 | 0.014616396 |
| C15ORF41     | 15q14           | -0.14345 | 0.004968 | 0.014650066 |
| TOP1         | 20q12           | -0.14343 | 0.004976 | 0.014670189 |
| TAF2         | 8q24.12         | -0.14343 | 0.004976 | 0.014670189 |
| RPL12        | 9q33.3          | -0.14341 | 0.004981 | 0.014681619 |
| TRMT13       | 1p21.2          | -0.14341 | 0.004981 | 0.014681983 |
| NEU3         | 11q13.4         | -0.14335 | 0.005    | 0.014731875 |
| KCNJ11       | 11p15.1         | -0.14335 | 0.005    | 0.014731875 |
| ZNF648       | 1q25.3          | 0.143344 | 0.005001 | 0.014731875 |
| CCAR1        | 10q21.3         | -0.14334 | 0.005001 | 0.014731875 |
| APOL2        | 22q12.3         | 0.143333 | 0.005005 | 0.014739036 |
| NR1H3        | 11p11.2         | -0.14333 | 0.005005 | 0.014739036 |
| NHLRC4       | 16p13.3         | -0.14331 | 0.005011 | 0.014752353 |
| UBE2K        | 4p14            | 0.14331  | 0.005012 | 0.014753417 |
| PHF23        | 17p13.1         | 0.14329  | 0.005018 | 0.014769199 |
| GABPB1-IT1   | 15q21.2         | -0.14327 | 0.005025 | 0.014787147 |
| ZDHHC17      | 12q21.2         | -0.14326 | 0.005027 | 0.014790838 |
| GZMM         | 19p13.3         | 0.143255 | 0.005029 | 0.014794557 |
| ZDHHC24      | 11q13.2         | -0.14322 | 0.005039 | 0.014824057 |
| GPR108       | 19p13.3         | 0.143212 | 0.005042 | 0.014828932 |
| CARTPT       | 5q13.2          | -0.14321 | 0.005044 | 0.014832561 |
| PDCD7        | 15q22.31        | -0.14319 | 0.005049 | 0.014844568 |
| MAGEA3       | Xq28            | -0.14319 | 0.00505  | 0.014845333 |
| PCOLCE2      | 3q23            | -0.14318 | 0.005052 | 0.014851768 |
| ANAPC13      | 3q22.2          | -0.14315 | 0.005062 | 0.014877283 |
| SRSF2        | 17q25.1         | -0.14311 | 0.005074 | 0.014909909 |
| PTGER3       | 1p31.1          | -0.14311 | 0.005075 | 0.014910084 |
| ENTPD5       | 14q24.3         | 0.143101 | 0.005076 | 0.014912819 |
| FTCD         | 21q22.3         | -0.14309 | 0.005079 | 0.014918691 |
| C1ORF220     | 1q25.2          | -0.14309 | 0.005081 | 0.014921427 |
| HLF          | 17q22           | -0.14307 | 0.005086 | 0.014935413 |
| FBLIM1       | 1p36.21         | 0.143045 | 0.005094 | 0.014955514 |
| DPP8         | 15q22.31        | 0.143036 | 0.005097 | 0.014961811 |
| TIMM17A      | 1q32.1          | 0.143018 | 0.005102 | 0.014975816 |
| SH3D19       | 4q31.3          | 0.143003 | 0.005107 | 0.014987254 |
| ZNF154       | 19q13.43        | -0.14298 | 0.005113 | 0.015003049 |
| RGS5         | 1q23.3          | -0.14298 | 0.005114 | 0.015003049 |
| SAMD11       | 1p36.33         | -0.14295 | 0.005123 | 0.015027117 |
| ZNF334       | 20q13.12        | -0.14295 | 0.005123 | 0.015027117 |
| LRRC8A       | 9q34.11         | 0.142945 | 0.005125 | 0.015030326 |
| ZNF160       | 19q13.41-q13.42 | -0.14293 | 0.005129 | 0.01503923  |
| TAC1         | 7q21.3          | -0.14293 | 0.00513  | 0.015040697 |
| CLN3         | 16p12.1         | 0.1429   | 0.005139 | 0.015065196 |
| PRG4         | 1q31.1          | -0.1429  | 0.005141 | 0.015067206 |
| NRBP2        | 8q24.3          | -0.14288 | 0.005144 | 0.015074298 |
| COPZ2        | 17q21.32        | -0.14286 | 0.005152 | 0.015096138 |
| CWC25        | 17q12           | -0.14286 | 0.005153 | 0.015096138 |
| VWA5B1       | 1p36.12         | -0.14285 | 0.005156 | 0.015104374 |
| GPC3         | Xq26.2          | 0.142822 | 0.005164 | 0.015123787 |
| ZIC4         | 3q24            | -0.14281 | 0.005167 | 0.015130449 |
| TNFAIP6      | 2q23.3          | -0.1428  | 0.005171 | 0.015140296 |
| LOC100133331 | 1p36.33         | -0.14277 | 0.005181 | 0.015168242 |

|          |                    |          |          |             |
|----------|--------------------|----------|----------|-------------|
| LIPM     | 10q23.31           | -0.14276 | 0.005183 | 0.01517167  |
| PCDHB18P | 5q31.3             | -0.14276 | 0.005185 | 0.015174123 |
| RIOK1    | 6p24.3             | -0.14272 | 0.005196 | 0.015205201 |
| PPP2R5E  | 14q23.2            | 0.142704 | 0.005201 | 0.015217297 |
| ERC2     | 3p14.3             | -0.14269 | 0.005205 | 0.015226688 |
| COL22A1  | 8q24.23-q24.3      | -0.14261 | 0.00523  | 0.015297788 |
| NLRC3    | 16p13.3            | 0.142582 | 0.00524  | 0.015324919 |
| PLSCR3   | 17p13.1            | -0.14252 | 0.00526  | 0.015381469 |
| ALOX15B  | 17p13.1            | 0.142507 | 0.005264 | 0.015390529 |
| SPDYE3   | 7q22.1             | -0.14246 | 0.005279 | 0.015432095 |
| SCARNA16 | 17q25.2            | -0.14246 | 0.005281 | 0.015434853 |
| CHD3     | 17p13.1            | 0.142452 | 0.005282 | 0.015436318 |
| MGMT     | 10q26.3            | -0.14244 | 0.005285 | 0.015441984 |
| ERF      | 19q13.2            | -0.14242 | 0.005292 | 0.015460122 |
| CCDC153  | 11q23.3            | -0.14242 | 0.005293 | 0.015460122 |
| SEC61A2  | 10p14              | -0.14237 | 0.005308 | 0.015502545 |
| RHEX     | 1q32.1             | 0.14231  | 0.005328 | 0.015559367 |
| EML3     | 11q12.3            | -0.1423  | 0.00533  | 0.01556252  |
| PRR34    | 22q13.31           | -0.14229 | 0.005336 | 0.015576973 |
| ADAP2    | 17q11.2            | 0.142272 | 0.00534  | 0.015588673 |
| TMPRSS3  | 21q22.3            | 0.142239 | 0.005351 | 0.015615242 |
| ANXA3    | 4q21.21            | -0.14224 | 0.005352 | 0.015615242 |
| NPR3     | 5p13.3             | -0.14224 | 0.005352 | 0.015615242 |
| ANKAR    | 2q32.2             | -0.1422  | 0.005364 | 0.015646827 |
| LDAH     | 2p24.1             | -0.14219 | 0.005369 | 0.015659368 |
| RETNLB   | 3q13.13            | 0.142176 | 0.005372 | 0.015665949 |
| SOAT1    | 1q25.2             | 0.142157 | 0.005378 | 0.015682372 |
| GABRA1   | 5q34               | -0.14215 | 0.005381 | 0.01568769  |
| PTGS2    | 1q31.1             | 0.142141 | 0.005383 | 0.015693043 |
| MAPK15   | -                  | -0.14213 | 0.005386 | 0.015699713 |
| PKD2L1   | 10q24.31           | 0.142121 | 0.00539  | 0.015707085 |
| BTBD9    | 6p21.2             | 0.142111 | 0.005393 | 0.015714519 |
| IRS1     | 2q36.3             | 0.142107 | 0.005394 | 0.015716056 |
| B3GALT4  | 6p21.32            | 0.142068 | 0.005407 | 0.015750928 |
| BLOC1S4  | 4p16.1             | -0.14207 | 0.005408 | 0.01575153  |
| KRTAP5-1 | 11p15.5            | -0.14205 | 0.005413 | 0.015761815 |
| MAP2K3   | 17p11.2            | 0.142049 | 0.005414 | 0.015761815 |
| PLCH2    | 1p36.32            | 0.142048 | 0.005414 | 0.015761815 |
| LSS      | 21q22.3            | 0.142041 | 0.005416 | 0.015764136 |
| INVS     | 9q31.1             | -0.14204 | 0.005417 | 0.015764136 |
| PDE11A   | 2q31.2             | 0.142038 | 0.005417 | 0.015764136 |
| ZNF618   | 9q32               | 0.142026 | 0.005421 | 0.015773125 |
| MAGEB6   | Xp21.3             | -0.14199 | 0.005433 | 0.015806653 |
| MKNK2    | 19p13.3            | 0.141976 | 0.005438 | 0.015816594 |
| PARP10   | 8q24.3             | -0.14197 | 0.005439 | 0.015819275 |
| MFNG     | 22q13.1            | 0.14196  | 0.005443 | 0.015827558 |
| RPGR     | Xp11.4             | -0.14194 | 0.005449 | 0.015843737 |
| E2F8     | 11p15.1            | 0.141932 | 0.005452 | 0.01585037  |
| COMMD2   | 3q25.1             | -0.14192 | 0.005458 | 0.015860717 |
| CUEDC1   | 17q22              | -0.14191 | 0.005458 | 0.015860717 |
| ZBED1    | Xp22.33 and Yp11.2 | -0.14191 | 0.005458 | 0.015860717 |
| PLK2     | 5q11.2             | 0.141895 | 0.005464 | 0.01587651  |
| KISS1    | 1q32.1             | -0.14189 | 0.005467 | 0.015882346 |
| CRAT     | 9q34.11            | 0.141864 | 0.005475 | 0.015902302 |
| PIP4K2C  | 12q13.3            | 0.141851 | 0.005479 | 0.015912501 |
| SLC12A4  | 16q22.1            | -0.14184 | 0.005483 | 0.015919786 |
| NBEAP1   | 15q11.2            | -0.14183 | 0.005485 | 0.015923533 |
| MRGPRF   | 11q13.3            | -0.14182 | 0.00549  | 0.01593687  |

|           |              |          |          |             |
|-----------|--------------|----------|----------|-------------|
| CEACAM1   | 19q13.2      | 0.14181  | 0.005493 | 0.015942912 |
| AP1S2     | Xp22.2       | -0.14177 | 0.005506 | 0.015978228 |
| VPS37A    | 8p22         | 0.141756 | 0.005511 | 0.015990774 |
| MPHOSPH6  | 16q23.3      | -0.14175 | 0.005514 | 0.015995342 |
| NPAS4     | 11q13.2      | -0.14174 | 0.005515 | 0.015995342 |
| SNRK      | 3p22.1       | 0.141744 | 0.005515 | 0.015995342 |
| LARS      | 5q32         | -0.14172 | 0.005522 | 0.016012512 |
| IDE       | 10q23.33     | 0.141704 | 0.005528 | 0.016029489 |
| ATL2      | 2p22.2-p22.1 | -0.1417  | 0.005531 | 0.016033884 |
| GUCY1A1   | 4q32.1       | -0.14168 | 0.005535 | 0.016045629 |
| BUD13     | 11q23.3      | -0.14162 | 0.005557 | 0.016106093 |
| ARID5A    | 2q11.2       | -0.14161 | 0.005559 | 0.016107084 |
| KIAA1549L | 11p13        | 0.141613 | 0.005559 | 0.016107084 |
| NUBP2     | 16p13.3      | -0.14158 | 0.005569 | 0.016133794 |
| TIMM8B    | 11q23.1      | -0.14156 | 0.005578 | 0.016157012 |
| PLEKHO2   | 15q22.31     | -0.14152 | 0.00559  | 0.016188078 |
| EPHB2     | 1p36.12      | -0.14152 | 0.00559  | 0.016188078 |
| RARA      | 17q21.2      | -0.14152 | 0.005592 | 0.016191234 |
| ZNF621    | 3p22.1       | -0.1415  | 0.005597 | 0.016202241 |
| VCL       | 10q22.2      | 0.141495 | 0.005599 | 0.016205601 |
| THRA      | 17q21.1      | -0.14149 | 0.005601 | 0.016205601 |
| OR1L6     | 9q33.2       | 0.14149  | 0.005601 | 0.016205601 |
| GADL1     | 3p24.1-p23   | -0.14149 | 0.005601 | 0.016205601 |
| LRRC10B   | 11q12.2      | -0.14148 | 0.005603 | 0.016207573 |
| ZFP36L1   | 14q24.1      | -0.14147 | 0.005608 | 0.016218059 |
| APBA3     | 19p13.3      | -0.14147 | 0.005608 | 0.016218059 |
| MCPH1     | 8p23.1       | 0.141454 | 0.005613 | 0.016230562 |
| C5ORF15   | 5q31.1       | 0.141445 | 0.005616 | 0.016236917 |
| PCMT1     | 6q25.1       | -0.14144 | 0.005619 | 0.016243488 |
| RAP2B     | 3q25.2       | 0.141431 | 0.005621 | 0.016246451 |
| ZCCHC18   | Xq22.2       | -0.1414  | 0.005633 | 0.016278109 |
| GABRD     | 1p36.33      | -0.14139 | 0.005636 | 0.01628469  |
| MGST2     | 4q31.1       | 0.141364 | 0.005644 | 0.016304905 |
| PLD5      | 1q43         | -0.14136 | 0.005645 | 0.016306913 |
| RRP15     | 1q41         | -0.14133 | 0.005655 | 0.016334083 |
| SUMF2     | 7p11.2       | -0.14133 | 0.005657 | 0.016336429 |
| RPA3      | 7p21.3       | -0.14129 | 0.005669 | 0.016368452 |
| NUP85     | 17q25.1      | -0.14126 | 0.005679 | 0.016395821 |
| NTM       | 11q25        | -0.14123 | 0.00569  | 0.016425465 |
| RIPK3     | 14q12        | 0.141226 | 0.005691 | 0.016425465 |
| RAET1E    | 6q25.1       | 0.1412   | 0.0057   | 0.016449249 |
| LTBP1     | 2p22.3       | -0.14113 | 0.005724 | 0.016515827 |
| TM7SF3    | 12p11.23     | 0.141121 | 0.005728 | 0.016521609 |
| PARL      | 3q27.1       | -0.14112 | 0.005728 | 0.016521609 |
| MT1M      | 16q13        | 0.141116 | 0.005729 | 0.016521609 |
| KCMF1     | 2p11.2       | -0.14112 | 0.005729 | 0.016521609 |
| ACTC1     | 15q14        | -0.14109 | 0.005739 | 0.01654774  |
| RABAC1    | 19q13.2      | 0.141053 | 0.005751 | 0.016579652 |
| ZNF548    | 19q13.43     | -0.14103 | 0.00576  | 0.016601265 |
| GPR3      | 1p36.11      | 0.141027 | 0.00576  | 0.016601265 |
| MORN2     | 2p22.1       | -0.14101 | 0.005766 | 0.016614679 |
| BCHE      | 3q26.1       | -0.14099 | 0.005775 | 0.016638284 |
| C2ORF16   | 2p23.3       | -0.14097 | 0.00578  | 0.016651067 |
| FGF5      | 4q21.21      | -0.14097 | 0.005782 | 0.016652946 |
| FBLN1     | 22q13.31     | -0.14095 | 0.005787 | 0.016662772 |
| STAT4     | 2q32.2-q32.3 | 0.14095  | 0.005787 | 0.016662772 |
| PNISR     | 6q16.2       | -0.14095 | 0.005787 | 0.016662772 |
| KRT1      | 12q13.13     | 0.140923 | 0.005797 | 0.0166847   |

|              |                 |          |          |             |
|--------------|-----------------|----------|----------|-------------|
| OXTR         | 3p25.3          | -0.14092 | 0.005797 | 0.0166847   |
| ADM          | 11p15.4         | 0.140912 | 0.0058   | 0.016692955 |
| LINC02716    | 11p11.2         | 0.140896 | 0.005806 | 0.016704878 |
| FAM218A      | 4q32.3          | -0.1409  | 0.005806 | 0.016704878 |
| DEPDC5       | 22q12.2-q12.3   | 0.140887 | 0.005809 | 0.016711205 |
| RAB11A       | 15q22.31        | 0.140884 | 0.00581  | 0.016711205 |
| GOLGA8A      | 15q14           | -0.14086 | 0.00582  | 0.016737555 |
| PIGM         | 1q23.2          | -0.14085 | 0.005822 | 0.016739947 |
| SNHG5        | 6q14.3          | -0.14084 | 0.005826 | 0.016749972 |
| TMEM177      | 2q14.2          | -0.1408  | 0.005838 | 0.016782274 |
| FXD4         | 10q11.21        | 0.140799 | 0.00584  | 0.016785403 |
| HSD17B7      | 1q23.3          | -0.14079 | 0.005842 | 0.016789256 |
| SF3A1        | 22q12.2         | 0.14078  | 0.005847 | 0.016800619 |
| SLC28A1      | 15q25.3         | -0.14076 | 0.005855 | 0.01682064  |
| LIN28B       | 6q16.3-q21      | -0.14074 | 0.005861 | 0.016832775 |
| ADAM33       | 20p13           | -0.14074 | 0.005861 | 0.016832775 |
| TMEM237      | 2q33.1          | -0.14074 | 0.005862 | 0.016832775 |
| SAE1         | 19q13.32        | -0.14073 | 0.005866 | 0.016843726 |
| SAP30BP      | 17q25.1         | -0.14071 | 0.005871 | 0.016853807 |
| RNF180       | 5q12.3          | -0.14071 | 0.005873 | 0.016857093 |
| GLRB         | 4q32.1          | -0.14069 | 0.00588  | 0.016875741 |
| CYFIP1       | 15q11.2         | 0.14062  | 0.005904 | 0.016941493 |
| CASKIN2      | 17q25.1         | -0.14061 | 0.005907 | 0.016947217 |
| OXGR1        | 13q32.1         | -0.14059 | 0.005914 | 0.016964733 |
| CKAP2        | 13q14.3         | -0.14058 | 0.005919 | 0.016978748 |
| UBAC1        | 9q34.3          | 0.140556 | 0.005927 | 0.016997294 |
| SF1          | 11q13.1         | -0.1405  | 0.005947 | 0.017053935 |
| TRERF1       | 6p21.1          | 0.140434 | 0.00597  | 0.017117857 |
| LINC02035    | 3q21.1          | 0.14036  | 0.005997 | 0.017192034 |
| DRD1         | 5q35.2          | -0.14033 | 0.006008 | 0.017219814 |
| MYOZ1        | 10q22.2         | -0.14033 | 0.006009 | 0.017221292 |
| LOC100134368 | 16p13.3         | -0.14031 | 0.006015 | 0.017234792 |
| CYB561       | 17q23.3         | 0.140271 | 0.00603  | 0.01727522  |
| SHB          | 9p13.1          | 0.140241 | 0.00604  | 0.017303254 |
| PPIAL4G      | 1q21.2          | -0.14023 | 0.006043 | 0.017307835 |
| HRK          | 12q24.22        | 0.140232 | 0.006044 | 0.01730808  |
| GPR157       | 1p36.22         | -0.14023 | 0.006046 | 0.017312219 |
| RALGAPA2     | 20p11.23        | 0.140222 | 0.006047 | 0.017313112 |
| CD99L2       | Xq28            | -0.1402  | 0.006055 | 0.017333333 |
| ISYNA1       | 19p13.11        | -0.14019 | 0.006057 | 0.017337822 |
| C8ORF76      | 8q24.13         | -0.14017 | 0.006067 | 0.017361218 |
| DUSP5        | 10q25.2         | 0.140151 | 0.006073 | 0.017378331 |
| MGAT4A       | 2q11.2          | 0.140145 | 0.006075 | 0.017381932 |
| HSPA5        | 9q33.3          | 0.140064 | 0.006105 | 0.017463681 |
| TACC3        | 4p16.3          | 0.140025 | 0.006119 | 0.017502187 |
| LHX6         | 9q33.2          | -0.14001 | 0.006124 | 0.01751443  |
| TPO          | 2p25.3          | 0.13998  | 0.006136 | 0.017545419 |
| ABCB9        | 12q24.31        | -0.13997 | 0.00614  | 0.017554167 |
| EIF3J        | 15q21.1         | -0.13996 | 0.006143 | 0.017559619 |
| MIOS         | 7p21.3          | -0.13994 | 0.006151 | 0.017581002 |
| TTYH1        | 19q13.42        | -0.13993 | 0.006155 | 0.017588214 |
| CTF1         | 16p11.2         | -0.13992 | 0.006158 | 0.017595568 |
| SRRM3        | 7q11.23         | -0.1399  | 0.006166 | 0.017616078 |
| RBM19        | 12q24.13-q24.21 | -0.13988 | 0.006174 | 0.017635011 |
| DTNBP1       | 6p22.3          | -0.13987 | 0.006175 | 0.017636377 |
| FSD1         | 19p13.3         | -0.13985 | 0.006186 | 0.017662816 |
| UBE2QL1      | 5p15.31         | -0.13985 | 0.006186 | 0.017662816 |
| RLIM         | Xq13.2          | -0.13984 | 0.006188 | 0.017666749 |

|          |              |          |          |             |
|----------|--------------|----------|----------|-------------|
| SPTBN2   | 11q13.2      | -0.13981 | 0.006198 | 0.01769064  |
| AOX1     | 2q33.1       | -0.13981 | 0.006198 | 0.01769064  |
| PHRF1    | 11p15.5      | -0.1398  | 0.006202 | 0.017698543 |
| WASH5P   | 19p13.3      | -0.13979 | 0.006206 | 0.017707244 |
| LNX2     | 13q12.2      | -0.13979 | 0.006208 | 0.017711365 |
| NXF2B    | Xq22.1       | -0.13978 | 0.006211 | 0.017715595 |
| MMP16    | 8q21.3       | -0.13977 | 0.006214 | 0.017721249 |
| PLPPR3   | 19p13.3      | -0.13977 | 0.006216 | 0.017722349 |
| SFRP2    | 4q31.3       | -0.13977 | 0.006216 | 0.017722349 |
| HSH2D    | 19p13.11     | 0.139758 | 0.006218 | 0.017727629 |
| KIF5A    | 12q13.3      | -0.13976 | 0.006219 | 0.017728062 |
| CTAGE4   | 7q35         | 0.13975  | 0.006221 | 0.01773006  |
| DPYSL5   | 2p23.3       | -0.13975 | 0.006222 | 0.01773006  |
| SPIDR    | 8q11.21      | -0.13973 | 0.006229 | 0.017746437 |
| RPL13P5  | 12p13.31     | -0.13973 | 0.006231 | 0.017748044 |
| MYO15A   | 17p11.2      | -0.13972 | 0.006232 | 0.017748044 |
| CARMIL2  | 16q22.1      | -0.13972 | 0.006232 | 0.017748044 |
| DERL3    | 22q11.23     | 0.139715 | 0.006235 | 0.017753784 |
| APOL1    | 22q12.3      | 0.13971  | 0.006236 | 0.017755851 |
| DDX5     | 17q23.3      | -0.13971 | 0.006237 | 0.017756312 |
| SLC25A34 | 1p36.21      | 0.139654 | 0.006257 | 0.017811024 |
| PER2     | 2q37.3       | 0.13965  | 0.006259 | 0.017811958 |
| WDR93    | 15q26.1      | -0.13965 | 0.00626  | 0.017811958 |
| S1PR5    | 19p13.2      | -0.13965 | 0.00626  | 0.017811958 |
| CCP110   | 16p12.3      | -0.13964 | 0.006262 | 0.017814032 |
| KLRK1    | 12p13.2      | 0.139611 | 0.006273 | 0.017843949 |
| CXCL14   | 5q31.1       | -0.13961 | 0.006276 | 0.017847451 |
| SLC17A9  | 20q13.33     | -0.1396  | 0.006279 | 0.017854142 |
| BMPR2    | 2q33.1-q33.2 | -0.13958 | 0.006284 | 0.0178642   |
| GPR107   | 9q34.11      | 0.139582 | 0.006284 | 0.0178642   |
| ATP11AUN | 13q34        | -0.13958 | 0.006285 | 0.0178642   |
| CDCA4    | 14q32.33     | -0.13957 | 0.006289 | 0.017872389 |
| EIF4A1   | 17p13.1      | 0.139553 | 0.006295 | 0.017888331 |
| ATP11A   | 13q34        | -0.13951 | 0.006313 | 0.017933682 |
| INTS4P1  | 7q11.21      | -0.13951 | 0.006313 | 0.017933682 |
| SNORC    | 2q37.1       | -0.1395  | 0.006315 | 0.017935145 |
| SYNE3    | 14q32.13     | 0.1395   | 0.006316 | 0.017935766 |
| ARSI     | 5q32         | -0.1395  | 0.006317 | 0.017937632 |
| RAD51B   | 14q24.1      | -0.13948 | 0.006322 | 0.017947368 |
| CCNA2    | 4q27         | 0.139454 | 0.006333 | 0.017977754 |
| KLHL6    | 3q27.1       | 0.139439 | 0.006339 | 0.017991209 |
| BEST3    | 12q15        | -0.13942 | 0.006344 | 0.018002618 |
| APOBEC3A | 22q13.1      | -0.13942 | 0.006345 | 0.018002618 |
| TEX38    | 1p33         | -0.1394  | 0.006353 | 0.018024759 |
| SIPA1    | 11q13.1      | -0.1394  | 0.006355 | 0.018026345 |
| DIP2B    | 12q13.12     | 0.139376 | 0.006363 | 0.0180466   |
| RAB5A    | 3p24.3       | 0.139361 | 0.006368 | 0.018059651 |
| PTPRR    | 12q15        | 0.139348 | 0.006373 | 0.018068752 |
| KRT73    | 12q13.13     | 0.139346 | 0.006374 | 0.018068752 |
| ECHDC3   | 10p14        | -0.13935 | 0.006374 | 0.018068752 |
| METTL9   | 16p12.2      | -0.13931 | 0.006387 | 0.018103763 |
| HNRNPLL  | 2p22.1       | -0.1393  | 0.006391 | 0.018110076 |
| FAM98C   | 19q13.2      | 0.13924  | 0.006415 | 0.018175591 |
| SIMC1    | 5q35.2       | 0.13923  | 0.006419 | 0.01818427  |
| FAM135A  | 6q13         | 0.139209 | 0.006427 | 0.018204682 |
| HNRNPL   | 19q13.2      | -0.13917 | 0.00644  | 0.018240624 |
| MED16    | 19p13.3      | 0.139139 | 0.006454 | 0.018276157 |
| TMEM232  | 5q22.1       | 0.139096 | 0.00647  | 0.018320793 |

|             |                    |          |          |             |
|-------------|--------------------|----------|----------|-------------|
| TMUB2       | 17q21.31           | -0.13908 | 0.006475 | 0.018331819 |
| MAPKBP1     | 15q15.1            | -0.13906 | 0.006486 | 0.018359233 |
| LMOD1       | 1q32.1             | -0.13905 | 0.006487 | 0.018360184 |
| SMIM8       | 6q15               | -0.13903 | 0.006497 | 0.018386925 |
| NUMBL       | 19q13.2            | -0.139   | 0.006506 | 0.018407776 |
| TMEM39B     | 1p35.2             | -0.13897 | 0.006518 | 0.018439562 |
| HBE1        | 11p15.4            | -0.13895 | 0.006528 | 0.018465767 |
| CTC1        | 17p13.1            | 0.138943 | 0.00653  | 0.018468312 |
| HAUS6       | 9p22.1             | -0.1389  | 0.006548 | 0.018515669 |
| SELPLG      | 12q24.11           | 0.138843 | 0.006569 | 0.018573163 |
| B3GALT5-AS1 | 21q22.2            | 0.138836 | 0.006572 | 0.018578282 |
| FBF1        | 17q25.1            | -0.1388  | 0.006586 | 0.018615407 |
| DPP6        | 7q36.2             | -0.1388  | 0.006587 | 0.018615407 |
| FCRL1       | 1q23.1             | 0.138791 | 0.006589 | 0.018620519 |
| TCL1B       | 14q32.13           | 0.138787 | 0.006591 | 0.018622544 |
| ARCN1       | 11q23.3            | 0.138783 | 0.006593 | 0.018624379 |
| FAM9A       | Xp22.31            | -0.13877 | 0.006597 | 0.018633302 |
| LMF2        | 22q13.33           | 0.138766 | 0.006599 | 0.018636652 |
| LKAAEAR1    | 20q13.33           | -0.13876 | 0.0066   | 0.018636652 |
| SCAMP5      | 15q24.2            | -0.13875 | 0.006606 | 0.01865196  |
| TNFSF14     | 19p13.3            | 0.138698 | 0.006626 | 0.018705351 |
| PRELID3A    | 18p11.21           | -0.13869 | 0.006629 | 0.018712718 |
| OSBPL5      | 11p15.4            | 0.138669 | 0.006637 | 0.018732932 |
| RPL19P12    | 7q22.1             | -0.13866 | 0.006639 | 0.018735346 |
| ZNF676      | 19p12              | -0.13865 | 0.006646 | 0.01875213  |
| HIST1H2BA   | 6p22.2             | -0.13863 | 0.006652 | 0.018764636 |
| SGCD        | 5q33.2-q33.3       | -0.13861 | 0.006662 | 0.018792497 |
| IGFBP6      | 12q13.13           | -0.1386  | 0.006663 | 0.018792497 |
| KIAA1257    | 3q21.3             | -0.13859 | 0.006671 | 0.018810613 |
| ZNF416      | 19q13.43           | -0.13855 | 0.006686 | 0.018850271 |
| RIMKLB      | 12p13.31           | -0.13854 | 0.006688 | 0.018853183 |
| FANCB       | Xp22.2             | -0.13852 | 0.006698 | 0.018880315 |
| TMEM267     | 5p12               | -0.1385  | 0.006704 | 0.018890997 |
| BCLAF3      | Xp22.12            | -0.1385  | 0.006704 | 0.018890997 |
| ZSCAN29     | 15q15.3            | -0.13845 | 0.006723 | 0.018939801 |
| SHF         | 15q21.1            | 0.138454 | 0.006723 | 0.018939801 |
| SLC6A19     | 5p15.33            | 0.138449 | 0.006725 | 0.018943407 |
| FAM222A     | 12q24.11           | -0.13839 | 0.006747 | 0.019001873 |
| MGAM2       | 7q34               | 0.13837  | 0.006757 | 0.019027177 |
| SRSF3       | 6p21.31-p21.2      | -0.13836 | 0.006759 | 0.019031154 |
| CCDC130     | 19p13.13           | -0.13835 | 0.006764 | 0.019039511 |
| ESF1        | 20p12.1            | -0.13835 | 0.006764 | 0.019039511 |
| SLC26A9     | 1q32.1             | 0.13835  | 0.006765 | 0.019039511 |
| CALY        | 10q26.3            | -0.13834 | 0.006769 | 0.019046581 |
| CEP72       | 5p15.33            | -0.13834 | 0.00677  | 0.019046581 |
| ASMT        | Xp22.33 and Yp11.2 | -0.13832 | 0.006778 | 0.019066146 |
| SNHG10      | 14q32.13           | -0.13832 | 0.006778 | 0.019066146 |
| PCDHB7      | 5q31.3             | -0.13831 | 0.006781 | 0.019072023 |
| IREB2       | 15q25.1            | 0.138301 | 0.006785 | 0.019078147 |
| BAIAP2L1    | 7q21.3-q22.1       | 0.13828  | 0.006793 | 0.019099688 |
| KATNAL2     | 18q21.1            | 0.138267 | 0.006799 | 0.019112187 |
| POU3F4      | Xq21.1             | -0.13826 | 0.006803 | 0.019120554 |
| CCDC96      | 4p16.1             | 0.138249 | 0.006806 | 0.0191274   |
| PHYHIP      | 8p21.3             | -0.13824 | 0.006811 | 0.019138689 |
| HMGCS1      | 5p12               | 0.138216 | 0.006819 | 0.019159064 |
| BIVM        | 13q33.1            | -0.13821 | 0.00682  | 0.019159567 |
| VPS11       | 11q23.3            | -0.1382  | 0.006824 | 0.019168417 |
| SKIL        | 3q26.2             | -0.13818 | 0.006832 | 0.019187099 |



|           |               |          |          |             |
|-----------|---------------|----------|----------|-------------|
| TBC1D10C  | 11q13.2       | 0.138177 | 0.006835 | 0.019192765 |
| TRIM26    | 6p22.1        | 0.138174 | 0.006836 | 0.01919327  |
| VPS9D1    | 16q24.3       | 0.138154 | 0.006844 | 0.019213696 |
| ACSBG2    | 19p13.3       | -0.13814 | 0.006849 | 0.019225216 |
| SPATA2L   | 16q24.3       | -0.13811 | 0.006861 | 0.019254227 |
| CIPC      | 14q24.3       | 0.13811  | 0.006862 | 0.019255605 |
| TM4SF1    | 3q25.1        | -0.13811 | 0.006864 | 0.01925907  |
| KBTD12    | 3q21.3        | 0.138085 | 0.006872 | 0.019279145 |
| ALAS2     | Xp11.21       | 0.138073 | 0.006877 | 0.019289976 |
| CCIN      | 9p13.3        | -0.13806 | 0.006882 | 0.019299371 |
| TCEAL2    | Xq22.1        | -0.13805 | 0.006887 | 0.019312597 |
| TMEM74B   | 20p13         | -0.13804 | 0.00689  | 0.01931772  |
| TCL1A     | 14q32.13      | 0.13804  | 0.006891 | 0.01931772  |
| NUDT12    | 5q21.2        | 0.138028 | 0.006896 | 0.019328563 |
| INPP5B    | 1p34.3        | -0.13802 | 0.0069   | 0.019338474 |
| ARHGAP5   | 14q12         | 0.138013 | 0.006902 | 0.019339017 |
| TMED8     | 14q24.3       | 0.13801  | 0.006903 | 0.019339017 |
| AAAS      | 12q13.13      | -0.13801 | 0.006903 | 0.019339017 |
| ABHD8     | 19p13.11      | -0.13798 | 0.006915 | 0.019367754 |
| HIST1H2BF | 6p22.2        | -0.13796 | 0.006923 | 0.019387798 |
| SIGLEC6   | 19q13.41      | 0.137942 | 0.006931 | 0.019408717 |
| ZBED9     | 6p22.1        | -0.13792 | 0.006939 | 0.01942888  |
| PRKCB     | 16p12.2-p12.1 | 0.137911 | 0.006944 | 0.019438811 |
| ILF3      | 19p13.2       | -0.13791 | 0.006945 | 0.019438811 |
| GPRASP1   | Xq22.1        | -0.13789 | 0.006951 | 0.019452503 |
| ITPRID2   | 2q31.3        | 0.137877 | 0.006958 | 0.019469687 |
| GJB1      | Xq13.1        | -0.13786 | 0.006966 | 0.019490124 |
| RFPL3S    | 22q12.3       | -0.13784 | 0.006975 | 0.019511074 |
| NDUFAF4   | 6q16.1        | -0.13783 | 0.006979 | 0.019521821 |
| GRIPAP1   | Xp11.23       | -0.1378  | 0.006988 | 0.019542469 |
| TFIP11    | 22q12.1       | -0.13778 | 0.006998 | 0.019569059 |
| AP3D1     | 19p13.3       | 0.137773 | 0.007001 | 0.019573828 |
| ING2      | 4q35.1        | 0.13777  | 0.007002 | 0.019575096 |
| MTOR      | 1p36.22       | 0.13775  | 0.00701  | 0.019592395 |
| JRKL      | 11q21         | -0.13775 | 0.00701  | 0.019592395 |
| ZBTB26    | 9q33.2        | -0.13772 | 0.007024 | 0.019625493 |
| EPHA2     | 1p36.13       | 0.137717 | 0.007024 | 0.019625493 |
| LRP4      | 11p11.2       | -0.1377  | 0.007031 | 0.01964206  |
| ARHGAP30  | 1q23.3        | 0.137696 | 0.007033 | 0.019644839 |
| KLK10     | 19q13.41      | 0.137675 | 0.007042 | 0.01966594  |
| ADH4      | 4q23          | 0.13767  | 0.007044 | 0.019667486 |
| NFYC      | 1p34.2        | 0.137669 | 0.007044 | 0.019667486 |
| CASQ2     | 1p13.1        | -0.13766 | 0.007046 | 0.019669822 |
| C9ORF153  | 9q21.33       | -0.13766 | 0.007047 | 0.019670448 |
| LMCD1     | 3p25.3        | -0.13764 | 0.007056 | 0.019692671 |
| UBOX5     | 20p13         | -0.13762 | 0.007063 | 0.019709541 |
| JSRP1     | 19p13.3       | 0.137619 | 0.007065 | 0.019710742 |
| SERPINB7  | 18q21.33      | 0.137617 | 0.007066 | 0.019710742 |
| XPO7      | 8p21.3        | 0.137615 | 0.007067 | 0.019710742 |
| DOK5      | 20q13.2       | -0.13761 | 0.007068 | 0.019710742 |
| TTC21B    | 2q24.3        | -0.1376  | 0.007071 | 0.019718708 |
| ZNF839    | 14q32.31      | 0.137596 | 0.007075 | 0.019722048 |
| VIPR2     | 7q36.3        | -0.13759 | 0.007076 | 0.019722048 |
| ANTXR1    | 2p13.3        | -0.13759 | 0.007076 | 0.019722048 |
| CCN3      | 8q24.12       | 0.137583 | 0.00708  | 0.019732645 |
| FGF16     | Xq21.1        | -0.13758 | 0.007082 | 0.019734242 |
| MSTO2P    | 1q22          | -0.13756 | 0.007088 | 0.019749569 |
| MC3R      | 20q13.2       | -0.13753 | 0.007102 | 0.019785551 |

|             |          |          |          |              |
|-------------|----------|----------|----------|--------------|
| PSG5        | 19q13.31 | -0.13753 | 0.007104 | 0.019786972  |
| NAP1L3      | Xq21.32  | -0.13752 | 0.007107 | 0.019792368  |
| ZNF10       | 12q24.33 | -0.13751 | 0.007109 | 0.019797089  |
| HERPUD2     | 7p14.2   | -0.1375  | 0.007116 | 0.01981227   |
| MED26       | 19p13.11 | -0.13749 | 0.007119 | 0.019818613  |
| LCE1E       | 1q21.3   | 0.137482 | 0.007123 | 0.019826211  |
| RPL35A      | 3q29     | -0.13746 | 0.007132 | 0.019850026  |
| SLC22A13    | 3p22.2   | -0.13743 | 0.007144 | 0.01987948   |
| SLC26A4     | 7q22.3   | 0.137411 | 0.007153 | 0.01990092   |
| BCL7A       | 12q24.31 | -0.1374  | 0.007157 | 0.019909152  |
| GNB1        | 1p36.33  | 0.137397 | 0.007159 | 0.01991273   |
| MUL1        | 1p36.12  | 0.137369 | 0.007171 | 0.019942751  |
| BMP4        | 14q22.2  | -0.13737 | 0.007172 | 0.019942751  |
| PTMA        | 2q37.1   | -0.13735 | 0.00718  | 0.019963117  |
| CXXC1       | 18q21.1  | 0.137329 | 0.007188 | 0.01998121   |
| RPL27       | 17q21.31 | -0.13732 | 0.00719  | 0.019984546  |
| SSX3        | Xp11.23  | -0.13731 | 0.007195 | 0.019997136  |
| P2RX4       | 12q24.31 | 0.137308 | 0.007197 | 0.019998097  |
| TMEM214     | 2p23.3   | 0.137302 | 0.007199 | 0.020002456  |
| TMPRSS9     | 19p13.3  | -0.13727 | 0.007213 | 0.0200037752 |
| SERPINA12   | 14q32.13 | -0.13725 | 0.007221 | 0.0200056466 |
| BTBD3       | 20p12.2  | 0.137233 | 0.007229 | 0.0200076292 |
| GAGE2D      | Xp11.23  | -0.1372  | 0.007244 | 0.020115924  |
| KCTD20      | 6p21.31  | -0.13716 | 0.007259 | 0.020153676  |
| KIAA1324L   | 7q21.12  | -0.13714 | 0.00727  | 0.020179642  |
| KIRREL1     | 1q23.1   | -0.13714 | 0.00727  | 0.020179642  |
| ECE2        | 3q27.1   | -0.13712 | 0.007278 | 0.02020023   |
| SNORD17     | 20p11.23 | -0.13711 | 0.007281 | 0.020203561  |
| PTBP3       | 9q32     | -0.13708 | 0.007294 | 0.020237582  |
| BMS1P20     | 22q11.22 | 0.137066 | 0.0073   | 0.020252803  |
| TSNAX-DISC1 | 1q42.2   | -0.13705 | 0.007308 | 0.02027114   |
| POLR3C      | 1q21.1   | -0.13704 | 0.007311 | 0.020276828  |
| DDX39B      | 6p21.33  | -0.13704 | 0.007313 | 0.020278146  |
| SAMD14      | 17q21.33 | -0.13703 | 0.007315 | 0.020282559  |
| FBRS        | 16p11.2  | -0.13702 | 0.007321 | 0.02029523   |
| LCA5L       | 21q22.2  | 0.136998 | 0.00733  | 0.020317721  |
| LRRC3       | 21q22.3  | 0.13697  | 0.007342 | 0.020347992  |
| TNNC1       | 3p21.1   | -0.13696 | 0.007345 | 0.020355297  |
| LINC01126   | 2p21     | -0.13692 | 0.007363 | 0.020402414  |
| IL1RAPL2    | Xq22.3   | 0.136907 | 0.007369 | 0.020415444  |
| TP73        | 1p36.32  | 0.136854 | 0.007392 | 0.020476749  |
| C9ORF135    | 9q21.12  | 0.13683  | 0.007403 | 0.020500826  |
| LGI3        | 8p21.3   | -0.13683 | 0.007403 | 0.020500826  |
| REN         | 1q32.1   | -0.1368  | 0.007414 | 0.020527314  |
| NDUFA11     | 19p13.3  | -0.13678 | 0.007426 | 0.020559209  |
| WDR59       | 16q23.1  | -0.13677 | 0.007429 | 0.020564721  |
| GTF2IRD2    | 7q11.23  | -0.13676 | 0.007432 | 0.020570233  |
| TXLNA       | 1p35.2   | 0.13676  | 0.007433 | 0.020570524  |
| YWHAG       | 7q11.23  | -0.13675 | 0.007436 | 0.02057353   |
| ORM2        | 9q32     | -0.13675 | 0.007437 | 0.02057353   |
| PRDM6       | 5q23.2   | -0.13675 | 0.007438 | 0.02057353   |
| RAB40AL     | Xq22.1   | -0.13673 | 0.007448 | 0.02060065   |
| PDSS2       | 6q21     | 0.136712 | 0.007454 | 0.020614327  |
| SPCS2       | 11q13.4  | -0.1367  | 0.007459 | 0.020625348  |
| ERBB2       | 17q12    | 0.136679 | 0.007469 | 0.020649209  |
| ABCB4       | 7q21.12  | -0.13666 | 0.007479 | 0.020674931  |
| WDR36       | 5q22.1   | 0.136648 | 0.007483 | 0.020678667  |
| FBXO25      | 8p23.3   | 0.136648 | 0.007483 | 0.020678667  |

|             |                 |          |          |             |
|-------------|-----------------|----------|----------|-------------|
| CDX1        | 5q32            | 0.13664  | 0.007486 | 0.020684471 |
| FANCL       | 2p16.1          | -0.13663 | 0.00749  | 0.020693426 |
| MTIF2       | 2p16.1          | -0.1366  | 0.007504 | 0.020729446 |
| EEF1AKMT3   | 12q14.1         | -0.13658 | 0.00751  | 0.020743679 |
| ZP3         | 7q11.23         | -0.13657 | 0.007518 | 0.020762131 |
| SYS1-DBNDD2 | 20q13.12        | -0.13656 | 0.007521 | 0.020766631 |
| PSD         | 10q24.32        | -0.13656 | 0.007522 | 0.020767182 |
| ARHGAP11A   | 15q13.3         | 0.136547 | 0.007527 | 0.020778558 |
| IDI1        | 10p15.3         | 0.1365   | 0.007548 | 0.020833711 |
| IMPA1       | 8q21.13         | 0.136475 | 0.007559 | 0.020860692 |
| DPH2        | 1p34.1          | -0.13647 | 0.007562 | 0.02086446  |
| CTAGE9      | 6q23.2          | 0.136468 | 0.007563 | 0.02086446  |
| TXNL4B      | 16q22.2         | -0.13646 | 0.007568 | 0.020874039 |
| FICD        | 12q23.3         | 0.136455 | 0.007568 | 0.020874039 |
| FAM171B     | 2q32.1          | -0.13643 | 0.007579 | 0.020900545 |
| AIFM3       | 22q11.21        | -0.13642 | 0.007582 | 0.020905346 |
| TMEM231     | 16q23.1         | 0.136416 | 0.007586 | 0.020914121 |
| JOSD2       | 19q13.33        | -0.13641 | 0.00759  | 0.020922237 |
| NRIP1       | 21q11.2-q21.1   | 0.136396 | 0.007595 | 0.020932478 |
| ITPR2       | 12p11.23        | -0.13639 | 0.007596 | 0.020932815 |
| AGAP6       | 10q11.23        | -0.13639 | 0.007597 | 0.020932815 |
| SERP1       | 3q25.1          | 0.136388 | 0.007598 | 0.020933116 |
| S100A7      | 1q21.3          | -0.13637 | 0.007606 | 0.02095187  |
| EEF1B2      | 2q33.3          | -0.13636 | 0.00761  | 0.020961308 |
| MYLK        | 3q21.1          | -0.13633 | 0.007625 | 0.0209988   |
| LAMC1       | 1q25.3          | -0.13632 | 0.007629 | 0.021007877 |
| RIPOR3      | 20q13.13        | -0.13631 | 0.007632 | 0.021012826 |
| TEKT4       | 2q11.1          | -0.1363  | 0.007639 | 0.021029008 |
| UBR4        | 1p36.13         | 0.136294 | 0.00764  | 0.021029008 |
| PHAX        | 5q23.2          | 0.136282 | 0.007645 | 0.021041026 |
| DEFB104A    | 8p23.1          | -0.13627 | 0.007652 | 0.021055412 |
| SOD2        | 6q25.3          | 0.136263 | 0.007654 | 0.021059218 |
| TRPM2       | 21q22.3         | -0.13626 | 0.007655 | 0.021059766 |
| SPATA31A6   | 9p11.2          | -0.13626 | 0.007656 | 0.021059766 |
| KLK5        | 19q13.41        | -0.13622 | 0.007675 | 0.021106861 |
| TUBB4B      | 9q34.3          | 0.136192 | 0.007686 | 0.021135713 |
| RPL36AL     | 14q21.3         | 0.136188 | 0.007688 | 0.021138158 |
| REX1BD      | 19p13.11        | -0.13618 | 0.00769  | 0.021141406 |
| MED28       | 4p15.32         | -0.13617 | 0.007697 | 0.021158031 |
| CD74        | 5q33.1          | 0.136116 | 0.007721 | 0.021218891 |
| CLDN16      | 3q28            | -0.13609 | 0.007733 | 0.021249992 |
| KIF25       | 6q27            | -0.13605 | 0.007749 | 0.021292032 |
| LRCH2       | Xq23            | -0.13603 | 0.007759 | 0.021314667 |
| CHMP3       | 2p11.2          | -0.136   | 0.007772 | 0.021349512 |
| HTT         | 4p16.3          | 0.135994 | 0.007776 | 0.021356835 |
| GNAZ        | 22q11.22-q11.23 | -0.13594 | 0.007801 | 0.021420895 |
| FOXG1       | 14q12           | -0.13592 | 0.00781  | 0.021444401 |
| STXBP2      | 19p13.2         | 0.135907 | 0.007816 | 0.021456988 |
| RHOBTB1     | 10q21.2         | -0.13589 | 0.007826 | 0.021478479 |
| IL17RD      | 3p14.3          | -0.13589 | 0.007826 | 0.021478479 |
| ZNF764      | 16p11.2         | -0.13587 | 0.007834 | 0.021495104 |
| NEK6        | 9q33.3          | 0.135867 | 0.007834 | 0.021495104 |
| SNRNP70     | 19q13.33        | -0.13584 | 0.007847 | 0.021528813 |
| TSPAN31     | 12q14.1         | -0.13581 | 0.00786  | 0.021559304 |
| DES         | 2q35            | -0.13581 | 0.007861 | 0.021560976 |
| MAGEC2      | Xq27.2          | -0.1358  | 0.007864 | 0.02156546  |
| RNF44       | 5q35.2          | -0.13573 | 0.007899 | 0.021658925 |
| ATP1B2      | 17p13.1         | -0.13571 | 0.007905 | 0.021670695 |

|            |              |          |          |             |
|------------|--------------|----------|----------|-------------|
| MAP3K13    | 3q27.2       | 0.135703 | 0.00791  | 0.021682508 |
| THSD4      | 15q23        | 0.135688 | 0.007917 | 0.021698138 |
| GTF2IRD2P1 | 7q11.23      | -0.13566 | 0.00793  | 0.021731071 |
| HNRNPH3    | 10q21.3      | -0.13566 | 0.007931 | 0.021731071 |
| CCDC80     | 3q13.2       | -0.13565 | 0.007934 | 0.021736317 |
| EID2B      | 19q13.2      | -0.13564 | 0.00794  | 0.021750336 |
| ANKRD29    | 18q11.2      | -0.13559 | 0.00796  | 0.021801964 |
| MPP4       | 2q33.1       | -0.13556 | 0.007975 | 0.021838983 |
| MLLT1      | 19p13.3      | -0.13554 | 0.007984 | 0.02186147  |
| GNL3L      | Xp11.22      | -0.13554 | 0.007987 | 0.021865642 |
| EGFL8      | 6p21.32      | -0.13553 | 0.007992 | 0.021876427 |
| CRYGN      | 7q36.1       | -0.13552 | 0.007997 | 0.021887808 |
| GSTT1      | 22q11.23     | 0.135487 | 0.00801  | 0.021921636 |
| DSCR4      | 21q22.13     | -0.13548 | 0.008012 | 0.021922039 |
| CD48       | 1q23.3       | 0.135466 | 0.00802  | 0.021943358 |
| METTL18    | 1q24.2       | -0.13545 | 0.008026 | 0.02195257  |
| NLRP3      | 1q44         | 0.135454 | 0.008026 | 0.02195257  |
| WDR63      | 1p22.3       | 0.135409 | 0.008047 | 0.022006899 |
| SLC9C2     | 1q25.1       | 0.135407 | 0.008048 | 0.022006899 |
| ARRB2      | 17p13.2      | -0.13539 | 0.008054 | 0.022019438 |
| RASAL3     | 19p13.12     | 0.135393 | 0.008055 | 0.022019438 |
| RNLS       | 10q23.31     | -0.13539 | 0.008057 | 0.02202108  |
| ZNF138     | 7q11.21      | -0.13539 | 0.008058 | 0.02202108  |
| GDI2       | 10p15.1      | 0.135383 | 0.008059 | 0.02202108  |
| PNMT       | 17q12        | -0.13538 | 0.00806  | 0.02202108  |
| C3ORF33    | 3q25.31      | 0.135329 | 0.008085 | 0.022085974 |
| ITGA11     | 15q23        | -0.13532 | 0.00809  | 0.022097135 |
| SNORD15A   | 11q13.4      | -0.1353  | 0.008099 | 0.022119336 |
| SEC63      | 6q21         | -0.1353  | 0.008101 | 0.022120583 |
| H1FX       | 3q21.3       | -0.13528 | 0.008106 | 0.022130969 |
| OXA1L      | 14q11.2      | 0.135283 | 0.008107 | 0.022130969 |
| CYP2J2     | 1p32.1       | 0.135256 | 0.008119 | 0.022161928 |
| FDFT1      | 8p23.1       | 0.135229 | 0.008132 | 0.022194879 |
| CNTN1      | 12q12        | -0.13522 | 0.008136 | 0.022200615 |
| DACH2      | Xq21.2       | -0.13517 | 0.008161 | 0.022267832 |
| RPL37      | 5p13.1       | -0.13516 | 0.008167 | 0.022274828 |
| RAPGEF5    | 7p15.3       | 0.135157 | 0.008167 | 0.022274828 |
| ZNF667     | 19q13.43     | -0.13515 | 0.008168 | 0.022274828 |
| C12ORF45   | 12q23.3      | -0.13515 | 0.008169 | 0.022274828 |
| RASSF9     | 12q21.31     | -0.13515 | 0.008169 | 0.022274828 |
| CRACR2B    | 11p15.5      | 0.135124 | 0.008182 | 0.022306545 |
| UTP18      | 17q21.33     | -0.13511 | 0.008189 | 0.02232145  |
| ACOT11     | 1p32.3       | 0.135104 | 0.008192 | 0.022325984 |
| ZFHX4      | 8q21.13      | -0.1351  | 0.008194 | 0.022328836 |
| ERLIN2     | 8p11.23      | 0.13506  | 0.008213 | 0.022378018 |
| GPR25      | 1q32.1       | 0.135049 | 0.008218 | 0.022389169 |
| ANGPT2     | 8p23.1       | -0.13504 | 0.008222 | 0.022397793 |
| BRWD1      | 21q22.2      | 0.135004 | 0.00824  | 0.0224426   |
| NPM2       | 8p21.3       | -0.13498 | 0.008253 | 0.02247491  |
| SLCO2A1    | 3q22.1-q22.2 | 0.134965 | 0.008259 | 0.022487251 |
| TMEM161A   | 19p13.11     | -0.13496 | 0.008262 | 0.022491311 |
| NME5       | 5q31.2       | -0.13496 | 0.008262 | 0.022491311 |
| NEUROG2    | 4q25         | -0.13495 | 0.008267 | 0.022500607 |
| NHP2       | 5q35.3       | -0.13494 | 0.008268 | 0.022500994 |
| WIZ        | 19p13.12     | -0.13494 | 0.00827  | 0.022504149 |
| NUBP1      | 16p13.13     | 0.134928 | 0.008276 | 0.022516627 |
| TMCO3      | 13q34        | 0.134907 | 0.008286 | 0.022541553 |
| ORMDL2     | 12q13.2      | 0.13489  | 0.008294 | 0.022560559 |

|           |              |          |          |             |
|-----------|--------------|----------|----------|-------------|
| RNF113B   | 13q32.2      | -0.13488 | 0.0083   | 0.022572626 |
| RNF103    | 2p11.2       | 0.134863 | 0.008308 | 0.02259011  |
| POLD4     | 11q13.2      | 0.134856 | 0.008311 | 0.022596961 |
| RALGPS2   | 1q25.2       | 0.134849 | 0.008315 | 0.022601881 |
| PITPNC1   | 17q24.2      | 0.134847 | 0.008315 | 0.022601881 |
| SWI5      | 9q34.11      | -0.13482 | 0.008328 | 0.022632281 |
| GPR135    | 14q23.1      | -0.13481 | 0.008336 | 0.022651354 |
| MPIG6B    | 6p21.33      | -0.13478 | 0.008347 | 0.022680019 |
| UBP1      | 3p22.3       | -0.13476 | 0.008358 | 0.022706045 |
| CATSPER3  | 5q31.1       | 0.134745 | 0.008365 | 0.022721888 |
| BACH1     | 21q21.3      | 0.134738 | 0.008368 | 0.022727218 |
| NR4A1     | 12q13.13     | 0.134716 | 0.008379 | 0.022753203 |
| WDR4      | 21q22.3      | -0.13471 | 0.008382 | 0.022759234 |
| ATP10B    | 5q34         | 0.134661 | 0.008406 | 0.022819828 |
| KDM4C     | 9p24.1       | 0.134655 | 0.008409 | 0.02282279  |
| CTXN1     | 19p13.2      | 0.134655 | 0.008409 | 0.02282279  |
| ZC3HAV1   | 7q34         | 0.134646 | 0.008413 | 0.022830615 |
| GBP4      | 1p22.2       | 0.134644 | 0.008414 | 0.022830615 |
| RAMP1     | 2q37.3       | 0.134622 | 0.008425 | 0.022856695 |
| ARNTL2    | 12p11.23     | 0.134616 | 0.008428 | 0.022861338 |
| PRCD      | 17q25.1      | -0.13461 | 0.008432 | 0.022868253 |
| CHD1      | 5q15-q21.1   | 0.1346   | 0.008436 | 0.022876336 |
| CAVIN3    | 11p15.4      | -0.13457 | 0.008449 | 0.022910502 |
| OR9G9     | 11q11        | -0.13457 | 0.008451 | 0.022912755 |
| ZNF85     | 19p12        | -0.13456 | 0.008454 | 0.022916347 |
| ZNF688    | 16p11.2      | -0.13455 | 0.008463 | 0.022936913 |
| HLA-F     | 6p22.1       | 0.134472 | 0.008499 | 0.023029218 |
| RABGGTA   | 14q12        | 0.134472 | 0.008499 | 0.023029218 |
| CDC14C    | 7p12.3       | 0.134456 | 0.008507 | 0.023047431 |
| SULT2A1   | 19q13.33     | -0.13443 | 0.008521 | 0.023081504 |
| DELE1     | 5q31.3       | 0.134426 | 0.008522 | 0.023081586 |
| MIGA1     | 1p31.1       | 0.134416 | 0.008527 | 0.023091747 |
| CRYBA4    | 22q12.1      | -0.13439 | 0.008538 | 0.023118765 |
| CD38      | 4p15.32      | 0.13439  | 0.00854  | 0.023120716 |
| PPP2R5C   | 14q32.31     | 0.134373 | 0.008548 | 0.02314019  |
| EXOSC10   | 1p36.22      | 0.134325 | 0.008572 | 0.023201369 |
| PLA2G3    | 22q12.2      | 0.13432  | 0.008574 | 0.023203935 |
| DOK7      | 4p16.3       | 0.134318 | 0.008575 | 0.023203935 |
| ZCRB1     | 12q12        | -0.13431 | 0.00858  | 0.0232122   |
| CHRD1     | Xq23         | -0.13431 | 0.008581 | 0.0232122   |
| IL22RA2   | 6q23.3       | 0.134305 | 0.008582 | 0.0232122   |
| ICA1L     | 2q33.2       | -0.13427 | 0.008599 | 0.023257154 |
| FCRL6     | 1q23.2       | 0.134225 | 0.008621 | 0.023313801 |
| GSTTP2    | 22q11.23     | 0.134216 | 0.008626 | 0.023323277 |
| SIGLEC17P | 19q13.41     | 0.134213 | 0.008628 | 0.023324345 |
| IFT140    | 16p13.3      | 0.134201 | 0.008634 | 0.023337131 |
| SHOC2     | 10q25.2      | 0.134185 | 0.008642 | 0.023355558 |
| ZFR2      | 19p13.3      | -0.13416 | 0.008656 | 0.023388482 |
| LINC02085 | 3q12.3       | 0.134156 | 0.008656 | 0.023388482 |
| MAGOHB    | 12p13.2      | -0.13415 | 0.00866  | 0.023397172 |
| FLRT3     | 20p12.1      | 0.134129 | 0.00867  | 0.023419745 |
| ID1       | 20q11.21     | -0.13411 | 0.008678 | 0.023437937 |
| ARFIP1    | 4q31.3       | 0.134087 | 0.008691 | 0.023470492 |
| CHKB-DT   | 22q13.33     | -0.13408 | 0.008694 | 0.02347552  |
| CLEC3A    | 16q23.1      | -0.13405 | 0.00871  | 0.023515891 |
| ZNHIT2    | 11q13.1      | -0.13405 | 0.008712 | 0.023516888 |
| TYW1      | 7q11.21      | -0.13398 | 0.008744 | 0.023600815 |
| DGKG      | 3q27.2-q27.3 | -0.13398 | 0.008747 | 0.023604464 |

|           |                 |          |          |             |
|-----------|-----------------|----------|----------|-------------|
| DIO2      | 14q31.1         | -0.13397 | 0.008748 | 0.023604464 |
| TRAPPC3   | 1p34.3          | -0.13394 | 0.008764 | 0.023644002 |
| HACL1     | 3p25.1          | -0.13394 | 0.008767 | 0.023650548 |
| PLA2G12A  | 4q25            | 0.133932 | 0.008769 | 0.023652671 |
| PRR15L    | 17q21.32        | 0.133923 | 0.008774 | 0.023661579 |
| PRMT1     | 19q13.33        | -0.13388 | 0.008797 | 0.023721891 |
| ODF3B     | 22q13.33        | 0.133863 | 0.008804 | 0.023738218 |
| AACS      | 12q24.31        | 0.133853 | 0.008809 | 0.023748338 |
| CDC42EP3  | 2p22.2          | -0.13384 | 0.008814 | 0.023757574 |
| MOB1B     | 4q13.3          | -0.13384 | 0.008818 | 0.023764444 |
| C1ORF141  | 1p31.3          | 0.133834 | 0.008819 | 0.023765003 |
| SLC2A11   | 22q11.23        | -0.13382 | 0.008825 | 0.023777598 |
| COL26A1   | 7q22.1          | -0.13382 | 0.008828 | 0.023782074 |
| AEBP1     | 7p13            | -0.13378 | 0.008847 | 0.023830508 |
| RPL23AP53 | 8p23.3          | 0.133763 | 0.008856 | 0.023850466 |
| TIMM10B   | 11p15.4         | -0.13374 | 0.008868 | 0.02388144  |
| FAM204A   | 10q26.11        | -0.13369 | 0.008892 | 0.023942242 |
| CYGB      | 17q25.1         | -0.13366 | 0.008909 | 0.023983437 |
| IQCA1     | 2q37.2-q37.3    | -0.13366 | 0.00891  | 0.023983437 |
| KLHDC7A   | 1p36.13         | 0.133634 | 0.008922 | 0.024010232 |
| DDX28     | 16q22.1         | -0.13363 | 0.008922 | 0.024010232 |
| ZNF701    | 19q13.41        | -0.13358 | 0.00895  | 0.024081346 |
| LINC00475 | 9q22.31         | -0.13357 | 0.008956 | 0.024093503 |
| DHODH     | 16q22.2         | -0.13355 | 0.008964 | 0.024113703 |
| WNT3A     | 1q42.13         | -0.13355 | 0.008966 | 0.024116385 |
| PPFIA1    | 11q13.3         | 0.133521 | 0.00898  | 0.024148807 |
| CHAF1A    | 19p13.3         | 0.133519 | 0.008981 | 0.024148807 |
| MOGAT1    | 2q36.1          | 0.133518 | 0.008982 | 0.024148807 |
| SNAPC1    | 14q23.2         | -0.13351 | 0.008985 | 0.024154532 |
| LOC283731 | 15q24.1         | -0.13349 | 0.008999 | 0.024184411 |
| TBC1D7    | 6p24.1          | -0.13349 | 0.008999 | 0.024184411 |
| MAGEB3    | Xp21.2          | -0.13347 | 0.009006 | 0.024198943 |
| KRT8      | 12q13.13        | 0.133432 | 0.009027 | 0.024251976 |
| DDX19A    | 16q22.1         | -0.13341 | 0.009036 | 0.024275259 |
| PCP2      | 19p13.2         | -0.1334  | 0.009043 | 0.024288714 |
| GUCY1A2   | 11q22.3         | -0.13339 | 0.00905  | 0.024304654 |
| SYT17     | 16p12.3         | 0.133376 | 0.009056 | 0.024317266 |
| PNCK      | Xq28            | -0.13337 | 0.009057 | 0.024317266 |
| ASB5      | 4q34.2          | -0.13337 | 0.009058 | 0.024317266 |
| B3GALT6   | 1p36.33         | -0.13336 | 0.009062 | 0.02432516  |
| GKAP1     | 9q21.32         | -0.13334 | 0.009072 | 0.024348465 |
| VGLL1     | Xq26.3          | -0.13333 | 0.009078 | 0.024360749 |
| ACP7      | 19q13.2         | -0.13333 | 0.009079 | 0.02436125  |
| INTS4     | 11q14.1         | -0.13332 | 0.009085 | 0.024372604 |
| ZNF652    | 17q21.32-q21.33 | 0.133317 | 0.009087 | 0.024375092 |
| FAM221A   | 7p15.3          | 0.1333   | 0.009096 | 0.024395449 |
| RPS10     | 6p21.31         | -0.1333  | 0.009098 | 0.024397407 |
| GRM5      | 11q14.2-q14.3   | -0.13329 | 0.009099 | 0.024397407 |
| DPH1      | 17p13.3         | 0.133269 | 0.009112 | 0.0244296   |
| METTL25   | 12q21.31        | 0.133266 | 0.009114 | 0.024429969 |
| MEG8      | 14q32.2-q32.31  | -0.13326 | 0.009116 | 0.024432086 |
| ADGRA2    | 8p11.23         | -0.13325 | 0.009122 | 0.024446488 |
| LINC01590 | 6q15            | -0.13322 | 0.009138 | 0.024484733 |
| LIPT1     | 2q11.2          | -0.13321 | 0.009143 | 0.024495834 |
| FNDC5     | 1p35.1          | -0.1332  | 0.009149 | 0.024509861 |
| POU3F2    | 6q16.1          | -0.13319 | 0.009152 | 0.024512834 |
| COG4      | 16q22.1         | -0.13319 | 0.009154 | 0.024512834 |
| MYO15B    | 17q25.1         | -0.13319 | 0.009154 | 0.024512834 |

|          |              |          |          |             |
|----------|--------------|----------|----------|-------------|
| TTBK1    | 6p21.1       | 0.133176 | 0.009161 | 0.024528117 |
| PSAPL1   | 4p16.1       | 0.133146 | 0.009177 | 0.02456711  |
| IVD      | 15q15.1      | 0.133125 | 0.009188 | 0.024592553 |
| SFMBT1   | 3p21.1       | 0.133099 | 0.009202 | 0.024626343 |
| HBS1L    | 6q23.3       | -0.13308 | 0.00921  | 0.024645824 |
| CASP14   | 19p13.12     | -0.13308 | 0.009214 | 0.024652328 |
| MFSD14A  | 1p21.2       | -0.13307 | 0.009219 | 0.024663085 |
| SNAI2    | 8q11.21      | -0.13305 | 0.009226 | 0.024677839 |
| FAM71B   | 5q33.3       | -0.13304 | 0.009234 | 0.024696318 |
| DUSP21   | Xp11.3       | 0.13303  | 0.009238 | 0.024705101 |
| HCFC2    | 12q23.3      | 0.133021 | 0.009243 | 0.024715099 |
| FAM78A   | 9q34.13      | 0.133004 | 0.009252 | 0.024734785 |
| FZD9     | 7q11.23      | -0.13296 | 0.009276 | 0.024792628 |
| TERF2IP  | 16q23.1      | -0.13296 | 0.009276 | 0.024792628 |
| ANAPC5   | 12q24.31     | -0.13294 | 0.009289 | 0.024823131 |
| CSNK1D   | 17q25.3      | -0.13291 | 0.009303 | 0.024857978 |
| CCDC116  | 22q11.21     | -0.13289 | 0.009314 | 0.024885262 |
| EPGN     | 4q13.3       | -0.13285 | 0.009332 | 0.02492868  |
| BOC      | 3q13.2       | -0.13283 | 0.009348 | 0.024967103 |
| TNFSF8   | 9q32-q33.1   | 0.132819 | 0.009351 | 0.024973441 |
| ADAMTS6  | 5q12.3       | -0.13278 | 0.009371 | 0.025022014 |
| PDE9A    | 21q22.3      | 0.132758 | 0.009384 | 0.025055244 |
| ZNF780B  | 19q13.2      | -0.13273 | 0.009398 | 0.025089445 |
| UBIAD1   | 1p36.22      | -0.13273 | 0.009401 | 0.025093241 |
| EPB41L2  | 6q23.1-q23.2 | 0.132709 | 0.009411 | 0.025115366 |
| ATP13A5  | 3q29         | 0.132704 | 0.009413 | 0.025119047 |
| WNT16    | 7q31.31      | -0.1327  | 0.009416 | 0.025123003 |
| CFAP206  | 6q15         | 0.132692 | 0.009419 | 0.025126842 |
| PRICKLE3 | Xp11.23      | -0.13269 | 0.00942  | 0.025126842 |
| AKT3     | 1q43-q44     | -0.13269 | 0.009423 | 0.025131267 |
| DZIP1    | 13q32.1      | -0.13268 | 0.009428 | 0.025142057 |
| CNTNAP3  | 9p12         | 0.132673 | 0.00943  | 0.025143818 |
| TMEFF1   | 9q31.1       | -0.13267 | 0.009433 | 0.025148902 |
| PPP2CA   | 5q31.1       | 0.132662 | 0.009436 | 0.025152397 |
| PTN      | 7q33         | -0.13265 | 0.009442 | 0.025166786 |
| PLGLB2   | 2p11.2       | -0.13264 | 0.009446 | 0.025170746 |
| EXOSC2   | 9q34.12      | -0.13264 | 0.009447 | 0.025170746 |
| TRPM6    | 9q21.13      | -0.13264 | 0.009448 | 0.025170746 |
| PKN3     | 9q34.11      | 0.132628 | 0.009454 | 0.025185144 |
| GAL3ST2  | 2q37.3       | 0.132624 | 0.009457 | 0.025188023 |
| PRR27    | 4q13.3       | -0.1326  | 0.009471 | 0.025222091 |
| BMP8A    | 1p34.3       | -0.13255 | 0.009498 | 0.025292394 |
| NUP43    | 6q25.1       | -0.13251 | 0.009516 | 0.025337206 |
| CRTAC1   | 10q24.2      | -0.1325  | 0.009522 | 0.025349125 |
| RFC4     | 3q27.3       | -0.13247 | 0.00954  | 0.025394395 |
| FAM168B  | 2q21.1       | -0.13242 | 0.009568 | 0.025464344 |
| FAM3B    | 21q22.3      | -0.13232 | 0.009623 | 0.025608343 |
| C7ORF61  | 7q22.1       | -0.13232 | 0.009625 | 0.025610205 |
| EGLN2    | 19q13.2      | -0.13229 | 0.009639 | 0.02564296  |
| CARS     | 11p15.4      | -0.13229 | 0.009641 | 0.025643667 |
| TUBB6    | 18p11.21     | -0.13227 | 0.00965  | 0.025664316 |
| WDR81    | 17p13.3      | 0.132262 | 0.009655 | 0.025676109 |
| VAT1L    | 16q23.1      | 0.132239 | 0.009668 | 0.025706439 |
| SPOCK2   | 10q22.1      | 0.132234 | 0.009671 | 0.025708292 |
| DMRT1    | 9p24.3       | -0.13223 | 0.009671 | 0.025708292 |
| GLYATL2  | 11q12.1      | -0.13217 | 0.009709 | 0.025804617 |
| MUC16    | 19p13.2      | -0.13216 | 0.009712 | 0.025810231 |
| PPP6C    | 9q33.3       | 0.132154 | 0.009715 | 0.025814357 |

|          |                |          |          |             |
|----------|----------------|----------|----------|-------------|
| FAM169A  | 5q13.3         | 0.132132 | 0.009727 | 0.02584277  |
| EIF4G2   | 11p15.4        | -0.13207 | 0.009759 | 0.025925467 |
| ALG5     | 13q13.3        | -0.13206 | 0.009765 | 0.025936726 |
| TMEM191A | 22q11.21       | -0.13206 | 0.009769 | 0.025942863 |
| MIR503HG | Xq26.3         | -0.13204 | 0.009777 | 0.025962752 |
| UHRF2    | 9p24.1         | -0.13203 | 0.009782 | 0.025972766 |
| TLX3     | 5q35.1         | -0.13203 | 0.009785 | 0.025975559 |
| DHX29    | 5q11.2         | 0.132011 | 0.009795 | 0.025998526 |
| NAALAD2  | 11q14.3        | -0.132   | 0.0098   | 0.026009161 |
| C22ORF24 | 22q12.3        | -0.132   | 0.009802 | 0.026010468 |
| PPWD1    | 5q12.3         | 0.131995 | 0.009804 | 0.02601221  |
| SNU13    | 22q13.2        | -0.13198 | 0.009812 | 0.026027426 |
| GABARAP  | 17p13.1        | 0.13198  | 0.009812 | 0.026027426 |
| TSPAN12  | 7q31.31        | 0.131975 | 0.009815 | 0.026031992 |
| ANKRD39  | 2q11.2         | -0.13192 | 0.009847 | 0.026114248 |
| ABHD13   | 13q33.3        | -0.13191 | 0.009854 | 0.026127831 |
| HMGCS2   | 1p12           | 0.131894 | 0.009861 | 0.026140854 |
| MSL3     | Xp22.2         | -0.13189 | 0.009861 | 0.026140854 |
| MAGEA5   | Xq28           | -0.13188 | 0.009866 | 0.026150844 |
| CEP135   | 4q12           | 0.131881 | 0.009868 | 0.026151632 |
| REEP5    | 5q22.2         | 0.131874 | 0.009872 | 0.026158149 |
| TCL6     | 14q32.13       | 0.131863 | 0.009878 | 0.026170223 |
| BMS1     | 10q11.21       | 0.131861 | 0.009879 | 0.026170223 |
| ZNF20    | 19p13.2        | -0.13185 | 0.009886 | 0.026184798 |
| MYH13    | 17p13.1        | 0.131839 | 0.009892 | 0.026196479 |
| TMEM64   | 8q21.3         | 0.131821 | 0.009902 | 0.026220744 |
| CD8A     | 2p11.2         | 0.131816 | 0.009905 | 0.026224373 |
| HTR2A    | 13q14.2        | -0.13177 | 0.009933 | 0.026295419 |
| FAM47A   | Xp21.1         | -0.13176 | 0.009937 | 0.026302995 |
| DDX31    | 9q34.13        | -0.13172 | 0.009959 | 0.026357825 |
| CCDC177  | 14q24.1        | 0.131709 | 0.009965 | 0.026370651 |
| CCNL1    | 3q25.31        | -0.13167 | 0.009986 | 0.026423515 |
| FAM185A  | 7q22.1         | -0.13167 | 0.009988 | 0.026423911 |
| MIR924HG | 18q12.2-q12.3  | 0.131663 | 0.009992 | 0.026430395 |
| SEMA4D   | 9q22.2         | 0.131653 | 0.009997 | 0.026441952 |
| IFI16    | 1q23.1         | 0.131618 | 0.010017 | 0.02649064  |
| SIRT5    | 6p23           | -0.13161 | 0.01002  | 0.026495127 |
| LYPD8    | 1q44           | 0.131604 | 0.010025 | 0.026505488 |
| MFAP4    | 17p11.2        | -0.13159 | 0.010032 | 0.02652004  |
| ABCC8    | 11p15.1        | 0.131586 | 0.010036 | 0.026526012 |
| SERPINA9 | 14q32.13       | 0.131583 | 0.010038 | 0.026527088 |
| ANO3     | 11p14.3-p14.2  | -0.13152 | 0.010075 | 0.026621809 |
| PTGIR    | 19q13.32       | -0.13151 | 0.010079 | 0.026630355 |
| SMN2     | 5q13.2         | -0.13151 | 0.010081 | 0.026631092 |
| SPATA21  | 1p36.13        | -0.1315  | 0.010084 | 0.026635211 |
| FAM156A  | Xp11.22        | -0.13149 | 0.01009  | 0.026649247 |
| A4GALT   | 22q13.2        | -0.13148 | 0.010097 | 0.026664056 |
| ZBP1     | 20q13.31       | -0.13145 | 0.010112 | 0.026697871 |
| FBXO6    | 1p36.22        | 0.1314   | 0.010142 | 0.026776039 |
| SASH1    | 6q24.3-q25.1   | 0.131397 | 0.010144 | 0.026777108 |
| EPHA8    | 1p36.12        | -0.13138 | 0.010152 | 0.026793793 |
| CTHRC1   | 8q22.3         | -0.13138 | 0.010154 | 0.026796994 |
| ZNF19    | 16q22.2        | -0.13137 | 0.010163 | 0.026809086 |
| ZNF815P  | 7p22.1         | -0.13137 | 0.010163 | 0.026809086 |
| DDA1     | 19p13.11       | 0.131365 | 0.010163 | 0.026809086 |
| TYW1B    | 7q11.22-q11.23 | -0.13136 | 0.010164 | 0.026809173 |
| PER1     | 17p13.1        | 0.131356 | 0.010168 | 0.026815179 |
| NTNG1    | 1p13.3         | -0.13135 | 0.010174 | 0.026827108 |



|            |          |          |          |             |
|------------|----------|----------|----------|-------------|
| NPY1R      | 4q32.2   | 0.131337 | 0.010179 | 0.026837741 |
| ELAC2      | 17p12    | 0.131323 | 0.010187 | 0.026854603 |
| KRTAP12-1  | 21q22.3  | -0.13131 | 0.010195 | 0.026872516 |
| ZNF555     | 19p13.3  | -0.13129 | 0.010204 | 0.026891682 |
| RASGRF2    | 5q14.1   | 0.131272 | 0.010217 | 0.026923107 |
| CROCCP3    | 1p36.13  | -0.13124 | 0.010237 | 0.026971903 |
| GABPA      | 21q21.3  | 0.131227 | 0.010243 | 0.026982505 |
| QPCT       | 2p22.2   | -0.13123 | 0.010244 | 0.026982505 |
| MROH1      | 8q24.3   | -0.1312  | 0.010258 | 0.027016008 |
| DDIT3      | 12q13.3  | -0.13119 | 0.010262 | 0.027023711 |
| RSU1       | 10p13    | -0.13118 | 0.010268 | 0.027036385 |
| LRATD1     | 2p24.3   | 0.131174 | 0.010274 | 0.027049063 |
| ST6GALNAC5 | 1p31.1   | -0.13115 | 0.010289 | 0.027083458 |
| C19ORF33   | 19q13.2  | 0.131138 | 0.010295 | 0.027096    |
| ATP5MF     | 7q22.1   | -0.13111 | 0.010311 | 0.027133946 |
| MEF2A      | 15q26.3  | 0.131104 | 0.010315 | 0.02713986  |
| KRTAP4-1   | 17q21.2  | -0.1311  | 0.010316 | 0.02713986  |
| C5ORF49    | 5p15.31  | -0.1311  | 0.01032  | 0.027148415 |
| NTF4       | 19q13.33 | -0.13108 | 0.010328 | 0.02716571  |
| DOCK2      | 5q35.1   | 0.131046 | 0.010349 | 0.027217576 |
| INTS14     | 15q22.31 | -0.131   | 0.010374 | 0.027278117 |
| NDUFA4     | 7p21.3   | -0.131   | 0.010375 | 0.027278117 |
| PCDHB15    | 5q31.3   | -0.131   | 0.010378 | 0.027282548 |
| APOBEC1    | 12p13.31 | 0.130975 | 0.010391 | 0.027313368 |
| CNPPD1     | 2q35     | -0.13097 | 0.010395 | 0.027320812 |
| KCNMB1     | 5q35.1   | -0.13096 | 0.010401 | 0.02732835  |
| NSD3       | 8p11.23  | 0.130958 | 0.010401 | 0.02732835  |
| MKKS       | 20p12.2  | -0.13093 | 0.010416 | 0.02736524  |
| DUSP1      | 5q35.1   | 0.130906 | 0.010432 | 0.027403178 |
| ACTR1B     | 2q11.2   | -0.1309  | 0.010435 | 0.027408297 |
| PPP1CA     | 11q13.2  | -0.1309  | 0.010438 | 0.027411407 |
| DHX37      | 12q24.31 | -0.13088 | 0.010449 | 0.027436072 |
| TTL        | 2q14.1   | -0.13088 | 0.01045  | 0.027436072 |
| HSF4       | 16q22.1  | -0.13086 | 0.01046  | 0.027459657 |
| PRDM4      | 12q23.3  | -0.13081 | 0.01049  | 0.027531732 |
| EFCAB3     | 17q23.2  | -0.13081 | 0.010491 | 0.027531732 |
| MSH6       | 2p16.3   | -0.13079 | 0.010501 | 0.027556099 |
| MSL1       | 17q21.1  | -0.13078 | 0.010509 | 0.027572023 |
| PSMD4      | 1q21.3   | -0.13074 | 0.01053  | 0.027623707 |
| DEFA6      | 8p23.1   | -0.13073 | 0.010534 | 0.027630912 |
| PTGIS      | 20q13.13 | -0.13073 | 0.010536 | 0.027630912 |
| CYP11B2    | 8q24.3   | -0.13073 | 0.010537 | 0.027630912 |
| TDRD1      | 10q25.3  | 0.130722 | 0.010541 | 0.027638731 |
| MGA        | 15q15.1  | -0.13071 | 0.010546 | 0.027647473 |
| UBE2E3     | 2q31.3   | -0.13071 | 0.010548 | 0.027648581 |
| TRIM25     | 17q22    | 0.130689 | 0.010561 | 0.027680437 |
| EIF5A2     | 3q26.2   | 0.130671 | 0.010572 | 0.027704871 |
| PCDH8      | 13q14.3  | -0.13065 | 0.010583 | 0.027729744 |
| ETV6       | 12p13.2  | 0.130649 | 0.010585 | 0.027732827 |
| ACSL5      | 10q25.2  | -0.13064 | 0.010593 | 0.027749519 |
| NPY4R      | 10q11.22 | 0.130625 | 0.010599 | 0.027762153 |
| GAPDH      | 12p13.31 | 0.130612 | 0.010607 | 0.0277766   |
| SPRR3      | 1q21.3   | 0.130612 | 0.010607 | 0.0277766   |
| SLC38A6    | 14q23.1  | -0.13059 | 0.010621 | 0.027806291 |
| MRPL21     | 11q13.3  | -0.13059 | 0.010622 | 0.027806291 |
| ARRDC2     | 19p13.11 | 0.130562 | 0.010637 | 0.027843741 |
| LINC00906  | 19q12    | -0.13052 | 0.010664 | 0.027909752 |
| R3HDM1     | 2q21.3   | -0.13051 | 0.010671 | 0.027925584 |

|                 |                 |          |          |             |
|-----------------|-----------------|----------|----------|-------------|
| SAPCD2          | 9q34.3          | -0.13049 | 0.010682 | 0.027950217 |
| SENP6           | 6q14.1          | -0.13048 | 0.010687 | 0.02795918  |
| RPS18           | 6p21.32         | -0.13047 | 0.01069  | 0.027964393 |
| KY              | 3q22.2          | 0.130454 | 0.010703 | 0.027989549 |
| HOXC10          | 12q13.13        | 0.130454 | 0.010703 | 0.027989549 |
| ANGPTL1         | 1q25.2          | -0.13042 | 0.010723 | 0.028039064 |
| IRF8            | 16q24.1         | 0.130404 | 0.010733 | 0.028061791 |
| TXNL1           | 18q21.31        | 0.130394 | 0.010739 | 0.028073038 |
| NEK1            | 4q33            | 0.130392 | 0.010741 | 0.028073038 |
| KCNE3           | 11q13.4         | 0.13039  | 0.010742 | 0.028073038 |
| AGER            | 6p21.32         | -0.13038 | 0.010749 | 0.02808693  |
| CLIP3           | 19q13.12        | -0.13038 | 0.01075  | 0.02808693  |
| LINC00628       | 1q32.1          | 0.130364 | 0.010758 | 0.028103626 |
| TCF20           | 22q13.2 22q13.3 | -0.13036 | 0.010759 | 0.02810391  |
| FAM217A         | 6p25.2          | 0.13035  | 0.010766 | 0.028117747 |
| TRAF3IP3        | 1q32.2          | 0.13033  | 0.010778 | 0.028146771 |
| STON1-GTF2A1L   | 2p16.3          | -0.1303  | 0.010799 | 0.028197156 |
| SMIM10L2B       | Xq26.3          | -0.13028 | 0.010806 | 0.028212039 |
| LL22NC03-63E9.3 | 22q11.22        | -0.13026 | 0.010819 | 0.028242963 |
| ERCC1           | 19q13.32        | -0.13026 | 0.010822 | 0.02824697  |
| LRP2            | 2q31.1          | -0.13025 | 0.010829 | 0.028261492 |
| CDCA8           | 1p34.3          | 0.13023  | 0.010839 | 0.028283315 |
| SLA             | 8q24.22         | 0.130211 | 0.010851 | 0.028310291 |
| KLK6            | 19q13.41        | -0.13021 | 0.010853 | 0.028312107 |
| DSTN            | 20p12.1         | -0.13019 | 0.010865 | 0.028340843 |
| FGD3            | 9q22.31         | -0.13018 | 0.010871 | 0.028347731 |
| MT1H            | 16q13           | 0.130178 | 0.010871 | 0.028347731 |
| PIP5K1P1        | 6p24.3          | -0.13016 | 0.010884 | 0.028377703 |
| TANGO6          | 16q22.1         | -0.13015 | 0.010891 | 0.028388662 |
| SPPL3           | 12q24.31        | -0.13015 | 0.010891 | 0.028388662 |
| AQP2            | 12q13.12        | 0.130128 | 0.010902 | 0.028414276 |
| BBS9            | 7p14.3          | -0.13012 | 0.01091  | 0.02843001  |
| HOXD13          | 2q31.1          | -0.1301  | 0.01092  | 0.028450983 |
| KLF2            | 19p13.11        | 0.130098 | 0.01092  | 0.028450983 |
| NTS             | 12q21.31        | -0.13006 | 0.010943 | 0.028501529 |
| RPS11           | 19q13.33        | -0.13006 | 0.010944 | 0.028501529 |
| ACSL3           | 2q36.1          | 0.13006  | 0.010944 | 0.028501529 |
| CPA2            | 7q32.2          | -0.13    | 0.010978 | 0.028587047 |
| CR2             | 1q32.2          | 0.129997 | 0.010983 | 0.028595825 |
| TADA2A          | 17q12           | -0.12999 | 0.010987 | 0.028600959 |
| COL18A1         | 21q22.3         | -0.12998 | 0.010991 | 0.028608662 |
| GCAT            | 22q13.1         | 0.129982 | 0.010992 | 0.028608662 |
| SUN3            | 7p12.3          | -0.12996 | 0.011003 | 0.028633208 |
| HPGDS           | 4q22.3          | 0.12991  | 0.011037 | 0.028716632 |
| ZNF781          | 19q13.12        | -0.1299  | 0.011045 | 0.028731393 |
| CCNDBP1         | 15q15.2         | 0.129897 | 0.011045 | 0.028731393 |
| PLA2R1          | 2q24.2          | -0.12985 | 0.011073 | 0.028800342 |
| UGT1A7          | 2q37.1          | 0.129848 | 0.011075 | 0.02880238  |
| RFPL2           | 22q12.3         | -0.12983 | 0.011087 | 0.028829826 |
| MESP1           | 15q26.1         | 0.129812 | 0.011098 | 0.028853531 |
| VKORC1L1        | 7q11.21         | -0.12979 | 0.011115 | 0.028893255 |
| ARL6IP4         | 12q24.31        | -0.12974 | 0.011144 | 0.028966581 |
| RNF144A         | 2p25.1          | 0.129736 | 0.011146 | 0.028966581 |
| LYPD6B          | 2q23.2          | 0.129734 | 0.011147 | 0.028966581 |
| PSMA8           | 18q11.2         | 0.129722 | 0.011155 | 0.028982136 |
| IL9R            | Xq28 and Yq12   | 0.129697 | 0.01117  | 0.029019356 |
| LINS1           | 15q26.3         | 0.129673 | 0.011185 | 0.029054068 |
| LRR37BP1        | 17q11.2         | -0.12966 | 0.011194 | 0.029068459 |

|           |                 |          |          |             |
|-----------|-----------------|----------|----------|-------------|
| RPL23A    | 17q11.2         | -0.12966 | 0.011195 | 0.029068459 |
| TRIM9     | 14q22.1         | -0.12966 | 0.011195 | 0.029068459 |
| NMB       | 15q25.2         | -0.12962 | 0.011216 | 0.029116305 |
| SHANK1    | 19q13.33        | -0.12962 | 0.011217 | 0.029116305 |
| CSRP2     | 12q21.2         | -0.12962 | 0.011218 | 0.029116305 |
| ZNF860    | 3p23-p22.3      | -0.12956 | 0.011254 | 0.029206585 |
|           | 7-Mar 2q24.2    | -0.12956 | 0.011258 | 0.029212007 |
| PGM5-AS1  | 9q21.11         | -0.12955 | 0.011265 | 0.029227982 |
| FLRT1     | 11q13.1         | -0.12954 | 0.01127  | 0.029236319 |
| FSTL1     | 3q13.33         | -0.12953 | 0.011274 | 0.029242922 |
| SCARA3    | 8p21.1          | -0.12953 | 0.011275 | 0.029242922 |
| H2BFXP    | Xq22.2          | -0.12953 | 0.011278 | 0.02924326  |
| TMEM9B    | 11p15.4         | 0.129525 | 0.011279 | 0.02924326  |
| EML5      | 14q31.3         | 0.129524 | 0.01128  | 0.02924326  |
| MAFA      | 8q24.3          | 0.129518 | 0.011283 | 0.029248208 |
| USP15     | 12q14.1         | 0.129513 | 0.011287 | 0.029253767 |
| HDAC10    | 22q13.33        | -0.1295  | 0.011295 | 0.029271613 |
| STK38     | 6p21.31         | -0.1295  | 0.011298 | 0.029274211 |
| ERI2      | 16p12.3         | 0.129477 | 0.01131  | 0.029300943 |
| B4GALNT1  | 12q13.3         | -0.12946 | 0.011319 | 0.029322011 |
| DKK1      | 10q21.1         | -0.12945 | 0.011325 | 0.029333482 |
| LANCL2    | 7p11.2          | -0.12945 | 0.011329 | 0.029340009 |
| LINC01551 | 14q12           | -0.12944 | 0.011331 | 0.029342632 |
| C17ORF97  | 17p13.3         | 0.129435 | 0.011337 | 0.029351972 |
| UNC93A    | 6q27            | -0.1294  | 0.011358 | 0.029402971 |
| VCX       | Xp22.31         | -0.1294  | 0.011361 | 0.02940752  |
| NUDT19    | 19q13.11        | -0.12939 | 0.011368 | 0.029420657 |
| FOXO1     | 13q14.11        | 0.129353 | 0.011389 | 0.029472116 |
| DCDC2     | 6p22.3          | 0.129347 | 0.011393 | 0.029478258 |
| ELP4      | 11p13           | -0.12934 | 0.011398 | 0.029486982 |
| MYL4      | 17q21.32        | -0.12933 | 0.011401 | 0.029491191 |
| HES5      | 1p36.32         | 0.129314 | 0.011414 | 0.029521609 |
| LGALS3BP  | 17q25.3         | 0.129297 | 0.011425 | 0.029545571 |
| ID3       | 1p36.12         | -0.12928 | 0.011436 | 0.029571802 |
| CTSK      | 1q21.3          | -0.12924 | 0.011464 | 0.029638546 |
| USP33     | 1p31.1          | 0.129232 | 0.011467 | 0.029642609 |
| GGA3      | 17q25.1         | -0.12922 | 0.011474 | 0.029658509 |
| PNOC      | 8p21.1          | 0.129169 | 0.011507 | 0.029739975 |
| ZNF574    | 19q13.2         | -0.12916 | 0.011514 | 0.029750473 |
| ZNF140    | 12q24.33        | -0.12916 | 0.011514 | 0.029750473 |
| RHBDD2    | 7q11.23         | -0.12915 | 0.011517 | 0.029753469 |
| BMP2K     | 4q21.21         | 0.129136 | 0.011528 | 0.029779141 |
| CNPY1     | 7q36.3          | -0.12913 | 0.011531 | 0.029781583 |
| HECW1     | 7p14.1-p13      | -0.12913 | 0.011534 | 0.029786905 |
| NAT8L     | 4p16.3          | -0.12912 | 0.011539 | 0.029794863 |
| TXN2      | 22q12.3         | 0.129112 | 0.011544 | 0.02980482  |
| C1ORF122  | 1p34.3          | -0.12909 | 0.011555 | 0.02982946  |
| HOXA9     | 7p15.2          | -0.12909 | 0.011559 | 0.029836432 |
| OR5A1     | 11q12.1         | -0.12905 | 0.011581 | 0.029888701 |
| HLA-DMA   | 6p21.32         | 0.128983 | 0.011628 | 0.030005857 |
| LOC441204 | 7p15.2          | -0.12894 | 0.011658 | 0.030078342 |
| PIEZO2    | 18p11.22-p11.21 | -0.12892 | 0.011668 | 0.030100611 |
| CFAP70    | 10q22.2         | -0.12892 | 0.011671 | 0.030105649 |
| PARD3     | 10p11.22-p11.21 | 0.12891  | 0.011676 | 0.030110749 |
| PCYT1A    | 3q29            | 0.128909 | 0.011677 | 0.030110749 |
| BOLA3     | 2p13.1          | -0.12891 | 0.011678 | 0.030110749 |
| GZMK      | 5q11.2          | 0.128896 | 0.011685 | 0.030125334 |
| KCNA7     | 19q13.33        | -0.12889 | 0.011687 | 0.030126421 |

|            |          |          |          |             |
|------------|----------|----------|----------|-------------|
| CST9       | 20p11.21 | -0.12888 | 0.011695 | 0.030143825 |
| CCDC71     | 3p21.31  | -0.12888 | 0.011698 | 0.030147605 |
| ARMC9      | 2q37.1   | -0.12886 | 0.011709 | 0.03017248  |
| PITPNM2    | 12q24.31 | 0.128838 | 0.011723 | 0.030203567 |
| CHRNA4     | 20q13.33 | -0.12882 | 0.011733 | 0.030226627 |
| IGIP       | 5q31.3   | 0.128818 | 0.011736 | 0.030229323 |
| DAAM1      | 14q23.1  | 0.128795 | 0.011751 | 0.030264783 |
| GGA1       | 22q13.1  | 0.128793 | 0.011753 | 0.030264783 |
| GNG11      | 7q21.3   | -0.12875 | 0.011784 | 0.030340756 |
| LRRC3B     | 3p24.1   | -0.12874 | 0.011785 | 0.030341446 |
| LINC00636  | 3q13.12  | -0.12873 | 0.011792 | 0.030353909 |
| ST6GALNAC4 | 9q34.11  | 0.128731 | 0.011794 | 0.030355036 |
| VASN       | 16p13.3  | -0.12871 | 0.011808 | 0.030386652 |
| HSD17B14   | 19q13.33 | -0.12869 | 0.011819 | 0.030411332 |
| NEXN       | 1p31.1   | -0.12866 | 0.01184  | 0.030462085 |
| UGT1A4     | 2q37.1   | 0.128651 | 0.011846 | 0.030471516 |
| PSMD9      | 12q24.31 | 0.128651 | 0.011847 | 0.030471516 |
| WNK4       | 17q21.2  | 0.128623 | 0.011865 | 0.03051537  |
| STMN4      | 8p21.2   | -0.12862 | 0.011869 | 0.030520513 |
| MID1P1     | Xp11.4   | 0.128581 | 0.011893 | 0.030579659 |
| SOWAHD     | Xq24     | 0.128576 | 0.011896 | 0.030583641 |
| CSGALNACT1 | 8p21.3   | -0.12854 | 0.011918 | 0.030633479 |
| NDC1       | 1p32.3   | 0.128542 | 0.011919 | 0.030633479 |
| ELMO3      | 16q22.1  | 0.128537 | 0.011922 | 0.030639152 |
| TULP2      | 19q13.33 | -0.12853 | 0.011928 | 0.030648723 |
| CRYL1      | 13q12.11 | 0.128519 | 0.011934 | 0.030662094 |
| EEFSEC     | 3q21.3   | -0.12851 | 0.011938 | 0.03066648  |
| CCL21      | 9p13.3   | -0.12849 | 0.011955 | 0.030706584 |
| SRARP      | 1p36.13  | -0.12844 | 0.011984 | 0.030773257 |
| GLT8D2     | 12q23.3  | -0.12844 | 0.011986 | 0.030773257 |
| SCARNA6    | 2q37.1   | -0.12844 | 0.011987 | 0.030773257 |
| EMB        | 5q11.1   | -0.12844 | 0.011987 | 0.030773257 |
| PPP1R3B    | 8p23.1   | -0.12844 | 0.01199  | 0.030774627 |
| HSD17B4    | 5q23.1   | 0.128435 | 0.011991 | 0.030774627 |
| IDS        | Xq28     | -0.12843 | 0.011993 | 0.030776979 |
| ATP10A     | 15q12    | -0.12838 | 0.01203  | 0.030867599 |
| FAM117A    | 17q21.33 | -0.12837 | 0.012035 | 0.030874173 |
| PROM2      | 2q11.1   | 0.128368 | 0.012035 | 0.030874173 |
| ADAM32     | 8p11.22  | -0.12836 | 0.01204  | 0.030882725 |
| SLC9A5     | 16q22.1  | 0.128349 | 0.012048 | 0.030898955 |
| GNG13      | 16p13.3  | 0.128343 | 0.012052 | 0.030902563 |
| STOML1     | 15q24.1  | -0.12834 | 0.012053 | 0.030902563 |
| TMEM270    | 7q11.23  | -0.12834 | 0.012055 | 0.030905063 |
| RNF14      | 5q31.3   | 0.12832  | 0.012068 | 0.03093369  |
| SCIMP      | 17p13.2  | 0.1283   | 0.012081 | 0.030963559 |
| ARHGDI3    | 12p12.3  | 0.128297 | 0.012083 | 0.0309641   |
| LINC00239  | 14q32.31 | 0.128295 | 0.012085 | 0.030964978 |
| PRKCH      | 14q23.1  | 0.128284 | 0.012092 | 0.030979635 |
| FAM110A    | 20p13    | -0.12828 | 0.012095 | 0.030982749 |
| TRIM4      | 7q22.1   | -0.12827 | 0.012104 | 0.031002258 |
| TLDC2      | 20q11.23 | -0.12823 | 0.01213  | 0.031065807 |
| LINC00592  | 12q13.13 | -0.12822 | 0.012137 | 0.031078325 |
| RSL24D1    | 15q21.3  | -0.1282  | 0.012146 | 0.031097078 |
| CPLX4      | 18q21.32 | 0.128202 | 0.012147 | 0.03109751  |
| RNASEH2A   | 19p13.13 | -0.12818 | 0.01216  | 0.031125894 |
| EIF5B      | 2q11.2   | -0.12818 | 0.012162 | 0.031125894 |
| HDC        | 15q21.2  | 0.12817  | 0.012169 | 0.031141321 |
| NPIP3      | 16p12.2  | -0.12811 | 0.012207 | 0.031234406 |

|              |               |          |          |             |
|--------------|---------------|----------|----------|-------------|
| STAT6        | 12q13.3       | 0.12808  | 0.01223  | 0.031289725 |
| COL8A1       | 3q12.1        | -0.12806 | 0.012244 | 0.031320339 |
| CTXN2        | 15q21.1       | -0.12806 | 0.012245 | 0.031320339 |
| MOXD1        | 6q23.2        | -0.12805 | 0.012249 | 0.031326592 |
| RPS6KA2      | 6q27          | 0.128029 | 0.012265 | 0.031363225 |
| EFNB3        | 17p13.1       | -0.12801 | 0.01228  | 0.031395887 |
| CEP85        | 1p36.11       | 0.128006 | 0.012281 | 0.031395887 |
| C9ORF16      | 9q34.11       | -0.12798 | 0.012298 | 0.031435607 |
| INSYN1       | 15q24.1       | -0.12796 | 0.012313 | 0.03146317  |
| RAB17        | 2q37.3        | -0.12796 | 0.012313 | 0.03146317  |
| CCL23        | 17q12         | 0.127958 | 0.012314 | 0.03146317  |
| DSP          | 6p24.3        | 0.127954 | 0.012317 | 0.031466723 |
| NAPB         | 20p11.21      | -0.12795 | 0.01232  | 0.031471014 |
| MPI          | 15q24.1       | 0.127938 | 0.012328 | 0.031486635 |
| SLCO4A1      | 20q13.33      | -0.12793 | 0.012334 | 0.031498485 |
| NDOR1        | 9q34.3        | 0.127902 | 0.012353 | 0.031542478 |
| GAGE12D      | Xp11.23       | -0.12789 | 0.01236  | 0.03155703  |
| SLC51B       | 15q22.31      | 0.127889 | 0.012362 | 0.03155703  |
| FGD2         | 6p21.2        | 0.127885 | 0.012364 | 0.031558776 |
| LINC01128    | 1p36.33       | 0.127873 | 0.012373 | 0.031575346 |
| FAP          | 2q24.2        | -0.12787 | 0.012373 | 0.031575346 |
| LINC01098    | 4q34.3        | -0.12786 | 0.012381 | 0.031590891 |
| ZNF671       | 19q13.43      | -0.12786 | 0.012384 | 0.031593806 |
| MICU3        | 8p22          | -0.1278  | 0.012424 | 0.031693382 |
| DIO3OS       | 14q32.31      | -0.12779 | 0.012429 | 0.031699914 |
| KCNJ4        | 22q13.1       | 0.12776  | 0.01245  | 0.031751597 |
| RPS6         | 9p22.1        | -0.12775 | 0.012457 | 0.031764847 |
| LOC100129534 | 1p36.32       | 0.12773  | 0.012472 | 0.031797351 |
| GLRA3        | 4q34.1        | -0.1277  | 0.012493 | 0.031847427 |
| LRIG1        | 3p14.1        | -0.12769 | 0.012501 | 0.031865499 |
| EVPLL        | 17p11.2       | 0.127671 | 0.012512 | 0.031889404 |
| MFSD9        | 2q12.1        | 0.127658 | 0.012521 | 0.031907403 |
| PPIL2        | 22q11.21      | 0.12765  | 0.012527 | 0.031918245 |
| CEACAM19     | 19q13.31      | -0.12764 | 0.012531 | 0.031919678 |
| BAIAP2       | 17q25.3       | -0.12764 | 0.012531 | 0.031919678 |
| CGB7         | 19q13.33      | -0.12763 | 0.012542 | 0.031945232 |
| RANGRF       | 17p13.1       | -0.12762 | 0.012548 | 0.031951843 |
| ARID1A       | 1p36.11       | 0.12762  | 0.012548 | 0.031951843 |
| ARRDC3-AS1   | 5q14.3        | 0.127587 | 0.012571 | 0.032005178 |
| SENP1        | 12q13.11      | -0.12757 | 0.01258  | 0.032025258 |
| ENPP4        | 6p21.1        | 0.127565 | 0.012586 | 0.032036136 |
| EMX2OS       | 10q26.11      | -0.12754 | 0.012603 | 0.032075435 |
| RAD9B        | 12q24.11      | -0.12753 | 0.012607 | 0.032082073 |
| NBPF9        | 1q21.2        | -0.12753 | 0.01261  | 0.032084906 |
| PCTP         | 17q22         | -0.12751 | 0.012622 | 0.032111163 |
| BTLA         | 3q13.2        | 0.127499 | 0.012632 | 0.032133268 |
| LDOC1        | Xq27.1        | -0.12749 | 0.01264  | 0.032147965 |
| BCL9         | 1q21.2        | -0.12743 | 0.012682 | 0.032252446 |
| C1QTNF4      | 11p11.2       | -0.12739 | 0.012706 | 0.032309253 |
| ADAMTS14     | 10q22.1       | -0.12737 | 0.012722 | 0.032345408 |
| LCE1B        | 1q21.3        | 0.127361 | 0.01273  | 0.032360957 |
| MED22        | 9q34.2        | -0.12735 | 0.01274  | 0.032382442 |
| SP5          | 2q31.1        | -0.12734 | 0.012743 | 0.032386071 |
| GPBAR1       | 2q35          | -0.12732 | 0.01276  | 0.032425697 |
| ACSF2        | 17q21.33      | -0.12729 | 0.012781 | 0.032473535 |
| MAPK4        | 18q21.1-q21.2 | -0.12728 | 0.012786 | 0.032483007 |
| FNDC1        | 6q25.3        | -0.12728 | 0.01279  | 0.032488183 |
| CCHCR1       | 6p21.33       | 0.127268 | 0.012796 | 0.032499197 |

|           |               |          |          |             |
|-----------|---------------|----------|----------|-------------|
| OSBPL10   | 3p23          | -0.12726 | 0.012801 | 0.03250905  |
| NAA38     | 17p13.1       | 0.127204 | 0.012841 | 0.032606382 |
| FUT11     | 10q22.2       | 0.127197 | 0.012846 | 0.032615873 |
| CCDC198   | 14q22.3       | -0.12716 | 0.012869 | 0.032669026 |
| PRAME     | 22q11.22      | -0.12716 | 0.012871 | 0.032670804 |
| MAU2      | 19p13.11      | -0.12711 | 0.01291  | 0.032764952 |
| STARD13   | 13q13.1-q13.2 | -0.12708 | 0.012929 | 0.032809687 |
| PRR23B    | 3q23          | -0.12708 | 0.012931 | 0.03281014  |
| LINC00634 | 22q13.2       | -0.12707 | 0.012939 | 0.032825634 |
| SPIN2A    | Xp11.21       | -0.12704 | 0.012956 | 0.032865318 |
| MFSD4B    | 6q21          | 0.127039 | 0.012959 | 0.032869421 |
| FAM225A   | 9q32          | -0.12702 | 0.012969 | 0.032890717 |
| RPSAP52   | 12q14.3       | -0.12701 | 0.012977 | 0.032906658 |
| SLC25A43  | Xq24          | -0.12699 | 0.012995 | 0.032947556 |
| SYT15     | 10q11.22      | 0.126982 | 0.013    | 0.032956138 |
| RUBCN     | 3q29          | 0.126941 | 0.013029 | 0.033025702 |
| TPI1P2    | 7q32.1        | -0.12693 | 0.013038 | 0.033040567 |
| XRCC6     | 22q13.2       | -0.12693 | 0.013038 | 0.033040567 |
| NT5DC2    | 3p21.1        | -0.12693 | 0.01304  | 0.033041111 |
| MIF       | 22q11.23      | -0.12692 | 0.013045 | 0.033048743 |
| AKT1      | 14q32.33      | 0.126915 | 0.013048 | 0.033053226 |
| HIST1H4E  | 6p22.2        | -0.12691 | 0.013052 | 0.03305918  |
| CIT       | 12q24.23      | 0.126862 | 0.013086 | 0.033141455 |
| CHD4      | 12p13.31      | -0.12685 | 0.013093 | 0.033154636 |
| FADS6     | 17q25.1       | -0.12683 | 0.013108 | 0.03318647  |
| CDON      | 11q24.2       | -0.12682 | 0.013116 | 0.033201869 |
| FGF1      | 5q31.3        | -0.12682 | 0.013118 | 0.033201869 |
| S100BPB   | 1p35.1        | -0.12682 | 0.013119 | 0.033201869 |
| USP4      | 3p21.31       | -0.12681 | 0.013125 | 0.033215071 |
| SLC44A1   | 9q31.1-q31.2  | 0.126778 | 0.013147 | 0.033266275 |
| RRP7A     | 22q13.2       | -0.12678 | 0.013149 | 0.033266429 |
| PGM5      | 9q21.11       | -0.12676 | 0.013163 | 0.033297484 |
| CYP3A7    | 7q22.1        | -0.12675 | 0.013172 | 0.033314695 |
| VCY       | Yq11.221      | -0.12674 | 0.013176 | 0.033323098 |
| C16ORF46  | 16q23.2       | 0.12673  | 0.013182 | 0.033333608 |
| MAGEA10   | Xq28          | -0.12673 | 0.013186 | 0.033339003 |
| APBB1IP   | 10p12.1       | 0.126715 | 0.013194 | 0.03335377  |
| FOXL2     | 3q22.3        | -0.12669 | 0.013212 | 0.033396722 |
| INCA1     | 17p13.2       | 0.126663 | 0.013232 | 0.033441298 |
| ACTG2     | 2p13.1        | -0.12666 | 0.013236 | 0.033447632 |
| UTF1      | 10q26.3       | -0.12665 | 0.013242 | 0.033458858 |
| LRRC74B   | 22q11.21      | 0.126643 | 0.013246 | 0.033465677 |
| MPO       | 17q22         | -0.12662 | 0.013261 | 0.033499314 |
| TRAF3IP1  | 2q37.3        | -0.12662 | 0.013266 | 0.03350599  |
| ZNF81     | Xp11.23       | -0.12661 | 0.013269 | 0.033511327 |
| NFX1      | 9p13.3        | 0.126608 | 0.013272 | 0.033512681 |
| QSER1     | 11p13         | -0.12659 | 0.013282 | 0.033535161 |
| SRP68     | 17q25.1       | 0.126591 | 0.013284 | 0.033536117 |
| HAPLN2    | 1q23.1        | 0.126582 | 0.013291 | 0.03354699  |
| ZNF720    | 16p11.2       | -0.12658 | 0.013292 | 0.03354699  |
| ILF3-DT   | 19p13.2       | -0.12658 | 0.013294 | 0.033549356 |
| MAPK9     | 5q35.3        | 0.126547 | 0.013316 | 0.033596692 |
| COL6A2    | 21q22.3       | -0.12655 | 0.013317 | 0.033596692 |
| STX4      | 16p11.2       | -0.12654 | 0.01332  | 0.033596692 |
| BEX4      | Xq22.1        | -0.12654 | 0.01332  | 0.033596692 |
| GPR35     | 2q37.3        | -0.12653 | 0.013329 | 0.033614428 |
| ZNF782    | 9q22.33       | -0.12652 | 0.013338 | 0.033632971 |
| SIM2      | 21q22.13      | -0.1265  | 0.013353 | 0.033666722 |

|             |            |          |          |             |
|-------------|------------|----------|----------|-------------|
| SLC37A2     | 11q24.2    | 0.126495 | 0.013354 | 0.033666884 |
| DMP1        | 4q22.1     | -0.12649 | 0.013361 | 0.033678812 |
| TDRD6       | 6p12.3     | -0.12648 | 0.013363 | 0.033678812 |
| SCN2B       | 11q23.3    | -0.12647 | 0.013377 | 0.033710145 |
| LINC00965   | 8p23.1     | -0.12645 | 0.013339 | 0.033738486 |
| PLCD1       | 3p22.2     | 0.126426 | 0.013406 | 0.03377161  |
| XKR8        | 1p35.3     | -0.12643 | 0.013406 | 0.03377161  |
| RASGEF1B    | 4q21.21    | 0.126407 | 0.01342  | 0.033802269 |
| SLC18A2     | 10q25.3    | 0.126404 | 0.013422 | 0.033803988 |
| VAX2        | 2p13.3     | -0.12639 | 0.013431 | 0.033821258 |
| USP54       | 10q22.2    | 0.126371 | 0.013447 | 0.033856352 |
| SKA1        | 18q21.1    | 0.126369 | 0.013448 | 0.033856352 |
| KDF1        | 1p36.11    | 0.126348 | 0.013464 | 0.033891503 |
| PBDC1       | Xq13.3     | -0.12634 | 0.013468 | 0.033898106 |
| ARMC7       | 17q25.1    | 0.126303 | 0.013497 | 0.033966333 |
| ZNF500      | 16p13.3    | -0.12627 | 0.013522 | 0.0340262   |
| SLC2A5      | 1p36.23    | 0.126246 | 0.013539 | 0.034064332 |
| WASH2P      | 2q14.1     | -0.12622 | 0.013556 | 0.034102097 |
| FERMT3      | 11q13.1    | 0.126216 | 0.013562 | 0.034112376 |
| LINC02693   | 17p11.2    | -0.12621 | 0.013564 | 0.034112947 |
| SRP72       | 4q12       | 0.126209 | 0.013567 | 0.034115303 |
| MVB12B      | 9q33.3     | -0.12621 | 0.013568 | 0.034115303 |
| TEKT3       | 17p12      | 0.126197 | 0.013576 | 0.034131238 |
| GLIS3-AS1   | 9p24.2     | 0.126179 | 0.013589 | 0.034159623 |
| ARL8B       | 3p26.1     | -0.12616 | 0.0136   | 0.034181168 |
| PLP2        | Xp11.23    | -0.12616 | 0.013601 | 0.034181168 |
| SOWAHB      | 4q21.1     | 0.126151 | 0.013611 | 0.034200794 |
| TWSG1       | 18p11.22   | 0.126146 | 0.013614 | 0.034203565 |
| ZNF253      | 19p13.11   | -0.12614 | 0.013615 | 0.034203565 |
| SCAF1       | 19q13.33   | -0.12613 | 0.013623 | 0.034217789 |
| EPB41L4A-DT | 5q22.2     | 0.126133 | 0.013624 | 0.034217789 |
| TBX18       | 6q14.3     | -0.12607 | 0.013671 | 0.034331282 |
| ARL8A       | 1q32.1     | -0.12606 | 0.013681 | 0.034345302 |
| ZNF32       | 10q11.21   | -0.12606 | 0.013682 | 0.034345302 |
| TMEM88B     | 1p36.33    | -0.12605 | 0.013684 | 0.034345302 |
| NCSTN       | 1q23.2     | 0.126054 | 0.013684 | 0.034345302 |
| E2F7        | 12q21.2    | 0.126045 | 0.01369  | 0.034358089 |
| CHST12      | 7p22.3     | -0.12604 | 0.013692 | 0.034358668 |
| ARAP3       | 5q31.3     | -0.12604 | 0.013695 | 0.03436169  |
| KLHL13      | Xq24       | 0.126035 | 0.013698 | 0.034363899 |
| SAMSN1      | 21q11.2    | 0.126017 | 0.013711 | 0.034392578 |
| EMILIN1     | 2p23.3     | -0.12598 | 0.013738 | 0.03445472  |
| TMCO4       | 1p36.13    | 0.125965 | 0.01375  | 0.03448243  |
| C4ORF48     | 4p16.3     | -0.12594 | 0.013766 | 0.034517733 |
| COL11A1     | 1p21.1     | -0.12594 | 0.013769 | 0.034520984 |
| SLC25A17    | 22q13.2    | -0.12593 | 0.013776 | 0.034534238 |
| ZNF771      | 16p11.2    | -0.12592 | 0.013783 | 0.034547893 |
| FPGT        | 1p31.1     | 0.125882 | 0.013813 | 0.034619302 |
| LPA         | 6q25.3-q26 | -0.12588 | 0.013817 | 0.03462291  |
| BRINP3      | 1q31.1     | 0.125869 | 0.013823 | 0.034632295 |
| HIST1H2AD   | 6p22.2     | -0.12587 | 0.013824 | 0.034632295 |
| PAQR8       | 6p12.2     | 0.125866 | 0.013826 | 0.034632295 |
| LINC00894   | Xq28       | -0.12586 | 0.013833 | 0.034646406 |
| MAN1B1-DT   | 9q34.3     | -0.12583 | 0.013853 | 0.034692522 |
| RBM45       | 2q31.2     | -0.12582 | 0.013857 | 0.034693448 |
| CHRM4       | 11p11.2    | 0.125825 | 0.013857 | 0.034693448 |
| SETD5       | 3p25.3     | -0.12582 | 0.013864 | 0.034706189 |
| ZNF460      | 19q13.43   | 0.125813 | 0.013866 | 0.03470738  |

|              |                     |          |          |             |
|--------------|---------------------|----------|----------|-------------|
| ZNF487       | 10q11.21            | 0.125804 | 0.013873 | 0.034716657 |
| LOC100131496 | 20q13.12            | -0.1258  | 0.013873 | 0.034716657 |
| BDH2         | 4q24                | -0.1258  | 0.013877 | 0.034721684 |
| INMT         | 7p14.3              | -0.12579 | 0.013882 | 0.034730887 |
| FAM118A      | 22q13.31            | -0.12576 | 0.013904 | 0.034780401 |
| MRPL23       | 11p15.5             | -0.12573 | 0.013929 | 0.0348382   |
| PDZK1        | 1q21.1              | -0.12572 | 0.013936 | 0.03485115  |
| KDM1B        | 6p22.3              | 0.125692 | 0.013958 | 0.034903275 |
| PADI3        | 1p36.13             | 0.125687 | 0.013962 | 0.034908683 |
| ANOS1        | Xp22.31             | -0.12567 | 0.013973 | 0.034930458 |
| GALK1        | 17q25.1             | -0.12556 | 0.014064 | 0.03515376  |
| RPS16        | 19q13.2             | -0.12555 | 0.014066 | 0.035155184 |
| FAM110B      | 8q12.1              | -0.12553 | 0.014083 | 0.035194377 |
| TRIM69       | 15q21.1             | 0.125482 | 0.01412  | 0.035278063 |
| VGLL2        | 6q22.1              | -0.12548 | 0.01412  | 0.035278063 |
| MAGEA12      | Xq28                | -0.12547 | 0.014128 | 0.03529235  |
| TMEM272      | 13q14.3             | -0.12546 | 0.014141 | 0.035320167 |
| SNRNP27      | 2p13.3              | -0.12545 | 0.014144 | 0.035324317 |
| TBC1D28      | 17p11.2             | -0.12544 | 0.01415  | 0.03533071  |
| CACTIN       | 19p13.3             | -0.12544 | 0.01415  | 0.03533071  |
| KCTD8        | 4p13                | -0.12541 | 0.014172 | 0.035380998 |
| JAML         | 11q23.3             | 0.12541  | 0.014176 | 0.035385943 |
| TRAK2        | 2q33.1              | 0.125398 | 0.014185 | 0.035405332 |
| VSX1         | 20p11.21            | -0.12539 | 0.01419  | 0.035413415 |
| AKAP9        | 7q21.2              | 0.125378 | 0.014201 | 0.035431768 |
| MPEG1        | 11q12.1             | 0.125377 | 0.014201 | 0.035431768 |
| RPL6         | 12q24.13            | -0.12533 | 0.014239 | 0.035520656 |
| FAM131A      | 3q27.1              | -0.12532 | 0.014242 | 0.035525027 |
| DOCK7        | 1p31.3              | 0.125308 | 0.014256 | 0.035554121 |
| BDP1         | 5q13.2              | 0.12529  | 0.01427  | 0.035584074 |
| SATL1        | Xq21.1              | -0.12528 | 0.014274 | 0.035589711 |
| E4F1         | 16p13.3             | -0.12528 | 0.014278 | 0.035592995 |
| A2ML1        | 12p13.31            | -0.12528 | 0.014278 | 0.035592995 |
| TFB1M        | 6q25.3              | -0.12527 | 0.014287 | 0.035608911 |
| DHX15        | 4p15.2              | 0.125266 | 0.014288 | 0.035608911 |
| IRF2BPL      | 14q24.3             | -0.12525 | 0.014302 | 0.035637645 |
| RNF128       | Xq22.3              | -0.12522 | 0.014323 | 0.035685314 |
| RPS5         | 19q13.43            | -0.12522 | 0.014324 | 0.0356855   |
| MCF2L2       | 3q27.1              | 0.12521  | 0.014332 | 0.035697647 |
| TSG101       | 11p15.1             | -0.12521 | 0.014333 | 0.035697647 |
| RGS18        | 1q31.2              | 0.125161 | 0.014371 | 0.035787289 |
| SEMA6C       | 1q21.3              | -0.12513 | 0.014397 | 0.035849283 |
| SCG3         | 15q21.2             | -0.12511 | 0.014409 | 0.035873592 |
| METTL2A      | 17q23.2             | -0.12511 | 0.014411 | 0.035874146 |
| ANXA4        | 2p13.3              | 0.125084 | 0.014431 | 0.03592082  |
| XIRP1        | 3p22.2              | -0.12508 | 0.014436 | 0.035926692 |
| SUOX         | 12q13.2             | 0.125076 | 0.014437 | 0.035926692 |
| PTPN7        | 1q32.1              | 0.125062 | 0.014448 | 0.035949709 |
| C11ORF71     | 11q23.2             | -0.12504 | 0.014464 | 0.035984197 |
| COA8         | 14q32.33            | -0.12504 | 0.014468 | 0.035989044 |
| MAL          | 2q11.1              | 0.125027 | 0.014476 | 0.036004714 |
| CCDC3        | 10p13               | -0.12502 | 0.014481 | 0.036013993 |
| LIME1        | 20q13.33            | -0.125   | 0.014495 | 0.036043432 |
| ABCD2        | 12q12               | 0.124979 | 0.014514 | 0.036086289 |
| TBXA2R       | 19p13.3             | -0.12497 | 0.014522 | 0.036101524 |
| OSBPL3       | 7p15.3              | -0.12496 | 0.014527 | 0.036109783 |
| PLEKHG3      | 14q23.3             | 0.124959 | 0.01453  | 0.036112946 |
| COL21A1      | 6p12.1 6p12.3-p11.2 | -0.12495 | 0.014536 | 0.03612243  |



|                 |               |          |          |             |
|-----------------|---------------|----------|----------|-------------|
| MSC             | 8q13.3        | -0.12494 | 0.014544 | 0.036138396 |
| CNIH1           | 14q22.2       | 0.124937 | 0.014547 | 0.036141988 |
| CSNK2B          | 6p21.33       | -0.12493 | 0.014549 | 0.036142605 |
| LASP1           | 17q12         | 0.124921 | 0.01456  | 0.03616448  |
| KCTD6           | 3p14.3        | -0.12491 | 0.014566 | 0.036174454 |
| TMEM170A        | 16q23.1       | 0.124895 | 0.014581 | 0.036207412 |
| U2AF2           | 19q13.42      | -0.12487 | 0.014603 | 0.03625744  |
| TRIM22          | 11p15.4       | 0.124855 | 0.014613 | 0.03627683  |
| CHRM2           | 7q33          | -0.12485 | 0.014614 | 0.03627683  |
| PAPLN           | 14q24.2       | -0.12485 | 0.014617 | 0.036278057 |
| CCNK            | 14q32.2       | 0.124834 | 0.01463  | 0.036305549 |
| COL3A1          | 2q32.2        | -0.12483 | 0.014635 | 0.036315131 |
| GFI1B           | 9q34.13       | 0.124815 | 0.014645 | 0.036334459 |
| NUDT9P1         | 10q23.32      | -0.1248  | 0.014655 | 0.036354216 |
| SNRPGP15        | 19p13.12      | -0.12477 | 0.014682 | 0.036416552 |
| RPL22           | 1p36.31       | -0.12472 | 0.014717 | 0.036500249 |
| C9ORF64         | 9q21.32       | 0.124705 | 0.014733 | 0.036535607 |
| CIDECP1         | 3p25.3        | -0.12467 | 0.014764 | 0.036607492 |
| GOSR1           | 17q11.2       | 0.124662 | 0.014768 | 0.036611334 |
| GNG10           | 9q31.3        | -0.12466 | 0.014769 | 0.036611334 |
| PSMD11          | 17q11.2       | -0.12463 | 0.014792 | 0.036662702 |
| HDAC1           | 1p35.2-p35.1  | 0.124613 | 0.014807 | 0.036695612 |
| MARS            | 12q13.3       | -0.12461 | 0.014812 | 0.03670356  |
| SPATA13         | 13q12.12      | -0.1246  | 0.014821 | 0.036721418 |
| LOC645752       | 15q24.3       | -0.12458 | 0.014834 | 0.036749716 |
| MARK4           | 19q13.32      | -0.12458 | 0.014837 | 0.036752845 |
| SEMA5B          | 3q21.1        | -0.12456 | 0.014853 | 0.036786256 |
| UBXN4           | 2q21.3        | -0.12454 | 0.014863 | 0.036807603 |
| ZC3H10          | 12q13.2       | -0.12453 | 0.014874 | 0.036828961 |
| TGIF2LX         | Xq21.31       | -0.12451 | 0.014893 | 0.036871962 |
| GSC             | 14q32.13      | -0.12449 | 0.014909 | 0.036907961 |
| GPAM            | 10q25.2       | -0.12447 | 0.014925 | 0.036942008 |
| AP1S3           | 2q36.1        | 0.124465 | 0.014927 | 0.036943073 |
| ATP6V1E2        | 2p21 2p16-p12 | -0.12443 | 0.014956 | 0.037010453 |
| LOC728392       | 17p13.2       | -0.1244  | 0.014979 | 0.037058162 |
| EIF3IP1         | 7q31.1        | -0.1244  | 0.014979 | 0.037058162 |
| LRRC69          | 8q21.3        | -0.12438 | 0.014997 | 0.037098487 |
| AQP1            | 7p14.3        | -0.12437 | 0.015004 | 0.037106985 |
| ZNF607          | 19q13.12      | -0.12437 | 0.015004 | 0.037106985 |
| SMYD3           | 1q44          | -0.12435 | 0.015017 | 0.037133712 |
| SETD3           | 14q32.2       | 0.124344 | 0.015026 | 0.037150446 |
| CENPC           | 4q13.2        | 0.124338 | 0.01503  | 0.037153212 |
| PPP3CC          | 8p21.3        | -0.12434 | 0.015032 | 0.037153212 |
| WNK1            | 12p13.33      | -0.12434 | 0.015032 | 0.037153212 |
| VEGFC           | 4q34.3        | -0.12432 | 0.015041 | 0.037170838 |
| NKX2-5          | 5q35.1        | -0.12431 | 0.01505  | 0.037188845 |
| IQCD            | 12q24.13      | 0.124283 | 0.015075 | 0.037245083 |
| NFKBID          | 19q13.12      | -0.12428 | 0.015077 | 0.037245083 |
| CRLS1           | 20p12.3       | -0.12427 | 0.015085 | 0.037260552 |
| CREBL2          | 12p13.1       | 0.124269 | 0.015087 | 0.037261192 |
| NTMT1           | 9q34.11       | -0.12426 | 0.015092 | 0.037269249 |
| GPRC5B          | 16p12.3       | -0.12421 | 0.015139 | 0.037379548 |
| MED18           | 1p35.3        | 0.124193 | 0.01515  | 0.037401396 |
| PXYLP1          | 3q23          | -0.12419 | 0.015151 | 0.037401396 |
| NUDT21          | 16q13         | -0.12418 | 0.015158 | 0.037413856 |
| TMPRSS5         | 11q23.2       | -0.12414 | 0.015192 | 0.037492633 |
| DYNC1H1         | 14q32.31      | 0.124136 | 0.015197 | 0.037498841 |
| TNFSF12-TNFSF13 | 17p13.1       | -0.12413 | 0.015202 | 0.037504076 |

|            |              |          |          |             |
|------------|--------------|----------|----------|-------------|
| C16ORF91   | 16p13.3      | -0.12413 | 0.015202 | 0.037504076 |
| TLX2       | 2p13.1       | 0.12412  | 0.01521  | 0.037517501 |
| TAP1       | 6p21.32      | 0.124116 | 0.015213 | 0.0375216   |
| ALDH1A3    | 15q26.3      | -0.12409 | 0.015234 | 0.037567471 |
| PRPF31     | 19q13.42     | -0.12408 | 0.015245 | 0.037591846 |
| NPLOC4     | 17q25.3      | -0.12406 | 0.015262 | 0.037628112 |
| CSPP1      | 8q13.1-q13.2 | -0.12405 | 0.015266 | 0.037633598 |
| CTSG       | 14q12        | 0.124043 | 0.015274 | 0.037647598 |
| SFXN4      | 10q26.11     | -0.12401 | 0.015299 | 0.037705347 |
| EDN3       | 20q13.32     | 0.124007 | 0.015304 | 0.037712317 |
| SLC36A2    | 5q33.1       | -0.12398 | 0.015323 | 0.037754913 |
| LOC440173  | 9q21.33      | -0.12397 | 0.015336 | 0.037782507 |
| SPRED2     | 2p14         | 0.123957 | 0.015345 | 0.037799705 |
| DLGAP1     | 18p11.31     | -0.12395 | 0.015355 | 0.03781986  |
| PPP1R26    | 9q34.3       | 0.123943 | 0.015357 | 0.037820001 |
| RHBDL3     | 17q11.2      | 0.123935 | 0.015363 | 0.037831648 |
| SNX10      | 7p15.2       | -0.12392 | 0.015376 | 0.037857967 |
| RMRP       | 9p13.3       | -0.12392 | 0.015378 | 0.037857967 |
| ICK        | 6p12.1       | 0.123908 | 0.015386 | 0.037873449 |
| GARNL3     | 9q33.3       | -0.1239  | 0.015389 | 0.037875389 |
| THSD1      | 13q14.3      | -0.1239  | 0.015395 | 0.037887144 |
| POMC       | 2p23.3       | -0.12389 | 0.015403 | 0.037901459 |
| C19ORF47   | 19q13.2      | -0.12387 | 0.01542  | 0.037935594 |
| SLC45A4    | 8q24.3       | 0.123866 | 0.015421 | 0.037935594 |
| PAX8-AS1   | 2q14.1       | -0.12384 | 0.01544  | 0.03797546  |
| GLI4       | 8q24.3       | -0.12384 | 0.015441 | 0.03797546  |
| SNHG7      | 9q34.3       | -0.12383 | 0.015452 | 0.03799783  |
| PCDHGA3    | 5q31.3       | -0.12383 | 0.015455 | 0.03799783  |
| EPHB1      | 3q22.2       | -0.12382 | 0.015456 | 0.03799783  |
| KCNN2      | 5q22.3       | 0.123736 | 0.01553  | 0.038176664 |
| CCDC171    | 9p22.3       | 0.123726 | 0.015538 | 0.038192077 |
| GPM6A      | 4q34.2       | -0.12372 | 0.015545 | 0.038204091 |
| P2RX5      | 17p13.2      | -0.12372 | 0.015547 | 0.038204091 |
| NCLN       | 19p13.3      | 0.123705 | 0.015556 | 0.038221242 |
| PPCS       | 1p34.2       | 0.123693 | 0.015567 | 0.038240846 |
| PLIN3      | 19p13.3      | 0.123691 | 0.015568 | 0.038240846 |
| PNLDC1     | 6q25.3       | -0.12368 | 0.015579 | 0.038262971 |
| WFDC9      | 20q13.12     | -0.12363 | 0.015616 | 0.038350625 |
| HAO2       | 1p12         | -0.12363 | 0.01562  | 0.038353567 |
| RNASET2    | 6q27         | -0.12363 | 0.015622 | 0.038353567 |
| NOL4       | 18q12.1      | 0.123625 | 0.015623 | 0.038353567 |
| TMEM37     | 2q14.2       | 0.123598 | 0.015646 | 0.038404782 |
| RBPMS      | 8p12         | -0.12359 | 0.015651 | 0.038413057 |
| SF3A3      | 1p34.3       | -0.12357 | 0.015672 | 0.038458067 |
| HMBS       | 11q23.3      | -0.12356 | 0.015678 | 0.038469042 |
| GREM1      | 15q13.3      | -0.12352 | 0.015713 | 0.038549558 |
| TMEM126A   | 11q14.1      | -0.12352 | 0.015716 | 0.038549558 |
| CYP51A1    | 7q21.2       | 0.123515 | 0.015717 | 0.038549558 |
| TRIM17     | 1q42.13      | -0.12351 | 0.015719 | 0.038551035 |
| GRHL1      | 2p25.1       | 0.123491 | 0.015738 | 0.038588171 |
| RORA       | 15q22.2      | -0.12349 | 0.015738 | 0.038588171 |
| MARK2      | 11q13.1      | 0.123488 | 0.01574  | 0.038588171 |
| ZNF436-AS1 | 1p36.12      | -0.12348 | 0.015748 | 0.038602986 |
| VPS35      | 16q11.2      | -0.12346 | 0.015763 | 0.038635827 |
| TMEM174    | 5q13.2       | 0.123432 | 0.015787 | 0.038689695 |
| TSPAN7     | Xp11.4       | 0.123412 | 0.015804 | 0.03872679  |
| ZCWPW1     | 7q22.1       | -0.12341 | 0.015807 | 0.038729265 |
| CFAP100    | 3q21.3       | -0.12339 | 0.01582  | 0.038755886 |

|          |          |          |          |             |
|----------|----------|----------|----------|-------------|
| PLEKHA5  | 12p12.3  | -0.12338 | 0.015835 | 0.038787452 |
| GPR34    | Xp11.4   | 0.123368 | 0.015842 | 0.038797377 |
| PEX11B   | 1q21.1   | 0.123367 | 0.015843 | 0.038797377 |
| CYREN    | 7q33     | -0.12336 | 0.015849 | 0.038807533 |
| ZNF821   | 16q22.2  | -0.12335 | 0.015855 | 0.038818596 |
| H2AFV    | 7p13     | -0.12335 | 0.015861 | 0.038825368 |
| HLA-B    | 6p21.33  | 0.123345 | 0.015862 | 0.038825368 |
| DYDC2    | 10q23.1  | -0.12334 | 0.01587  | 0.038840962 |
| HEMGN    | 9q22.33  | 0.123329 | 0.015876 | 0.038850448 |
| ZNF431   | 19p12    | -0.12332 | 0.015887 | 0.038872597 |
| CD79B    | 17q23.3  | 0.12331  | 0.015893 | 0.03887757  |
| TMEM14C  | 6p24.2   | -0.12331 | 0.015893 | 0.03887757  |
| FAM210A  | 18p11.21 | 0.123299 | 0.015902 | 0.038893629 |
| TMEM167B | 1p13.3   | 0.123291 | 0.015909 | 0.038902907 |
| SLC7A4   | 22q11.21 | -0.12329 | 0.015909 | 0.038902907 |
| RSAD1    | 17q21.33 | -0.12329 | 0.015911 | 0.038902907 |
| SURF1    | 9q34.2   | -0.12328 | 0.015922 | 0.038923954 |
| ENDOV    | 17q25.3  | 0.123263 | 0.015933 | 0.038944334 |
| MTCH1    | 6p21.2   | -0.12326 | 0.015934 | 0.038944334 |
| BMI1     | 10p12.2  | -0.12326 | 0.015939 | 0.038952716 |
| TSR1     | 17p13.3  | 0.123239 | 0.015953 | 0.038981492 |
| PDZRN4   | 12q12    | -0.12323 | 0.015957 | 0.038986879 |
| TUT4     | 1p32.3   | -0.12323 | 0.015962 | 0.038994645 |
| LMTK3    | 19q13.33 | -0.12322 | 0.015969 | 0.039007118 |
| STIMATE  | 3p21.1   | -0.12321 | 0.015974 | 0.039014606 |
| RNF10    | 12q24.31 | 0.123203 | 0.015984 | 0.039034345 |
| IMP4     | 2q21.1   | -0.12317 | 0.016011 | 0.039093604 |
| TMEM165  | 4q12     | 0.123148 | 0.016032 | 0.039141113 |
| HOXA11   | 7p15.2   | -0.12313 | 0.016047 | 0.03917068  |
| ZNF135   | 19q13.43 | -0.12313 | 0.01605  | 0.03917068  |
| CASC8    | 8q24.21  | -0.12313 | 0.01605  | 0.03917068  |
| CCDC113  | 16q21    | -0.12312 | 0.016054 | 0.039174802 |
| SLC29A2  | 11q13.2  | -0.12306 | 0.016109 | 0.039305852 |
| NT5C1B   | 2p24.2   | -0.12306 | 0.016111 | 0.039305915 |
| ADAMTS18 | 16q23.1  | -0.12305 | 0.016117 | 0.039315313 |
| ZNF646   | 16p11.2  | -0.12304 | 0.016121 | 0.039320705 |
| EMC8     | 16q24.1  | -0.12304 | 0.016124 | 0.039321852 |
| PSMC3    | 11p11.2  | -0.123   | 0.016158 | 0.039400234 |
| QSOX2    | 9q34.3   | -0.12298 | 0.016175 | 0.039436159 |
| CYMP     | 1p13.3   | 0.122971 | 0.016186 | 0.039458704 |
| EPCAM    | 2p21     | -0.12297 | 0.01619  | 0.039464101 |
| ALG2     | 9q22.33  | 0.122962 | 0.016193 | 0.039464114 |
| LOX      | 5q23.1   | -0.12296 | 0.016194 | 0.039464114 |
| AATK     | 17q25.3  | 0.122951 | 0.016203 | 0.039481758 |
| SCGB1C1  | 11p15.5  | 0.122927 | 0.016224 | 0.039520715 |
| AGAP4    | 10q11.22 | -0.12293 | 0.016225 | 0.039520715 |
| RENBP    | Xq28     | -0.12293 | 0.016225 | 0.039520715 |
| VNN3     | 6q23.2   | 0.122896 | 0.016251 | 0.03956964  |
| DCTN1    | 2p13.1   | -0.1229  | 0.016251 | 0.03956964  |
| HMX3     | 10q26.13 | 0.122896 | 0.016251 | 0.03956964  |
| SPAG1    | 8q22.2   | -0.12289 | 0.016253 | 0.03956964  |
| CENPK    | 5q12.3   | 0.122883 | 0.016262 | 0.039587785 |
| MAGEA6   | Xq28     | -0.12287 | 0.01627  | 0.039600369 |
| NIBAN3   | 19p13.11 | 0.122871 | 0.016273 | 0.039604021 |
| GPBP1    | 5q11.2   | 0.122842 | 0.016299 | 0.039661115 |
| DNAH5    | 5p15.2   | 0.122836 | 0.016304 | 0.039669161 |
| ALG12    | 22q13.33 | 0.12283  | 0.01631  | 0.039678157 |
| DHCR7    | 11q13.4  | -0.12282 | 0.016321 | 0.039700487 |

|              |              |          |          |             |
|--------------|--------------|----------|----------|-------------|
| HOXA7        | 7p15.2       | -0.12279 | 0.016343 | 0.039748867 |
| PRR5-ARHGAP8 | 22q13.31     | -0.12279 | 0.016345 | 0.039748867 |
| DPPA2P3      | 3q29         | -0.12277 | 0.016358 | 0.039774702 |
| DRC3         | 17p11.2      | 0.122773 | 0.016359 | 0.039774702 |
| CCDC142      | 2p13.1       | -0.12276 | 0.016367 | 0.0397897   |
| SDAD1        | 4q21.1       | -0.12276 | 0.01637  | 0.039790865 |
| THOC2        | Xq25         | -0.12274 | 0.016389 | 0.039832172 |
| TMEM209      | 7q32.2       | -0.12273 | 0.016396 | 0.039838906 |
| LINC02347    | 12q24.32     | 0.122731 | 0.016397 | 0.039838906 |
| KDM4B        | 19p13.3      | 0.12273  | 0.016397 | 0.039838906 |
| DYNC1LI2     | 16q22.1      | 0.122726 | 0.0164   | 0.039840998 |
| TGS1         | 8q12.1       | -0.12269 | 0.016431 | 0.039910063 |
| LMNTD1       | 12p12.1      | -0.12269 | 0.016433 | 0.039910063 |
| NUP188       | 9q34.11      | 0.122687 | 0.016435 | 0.039911036 |
| F12          | 5q35.3       | 0.12268  | 0.016441 | 0.039917167 |
| LAMP5        | 20p12.2      | -0.12268 | 0.016442 | 0.039917167 |
| KDSR         | 18q21.33     | 0.122673 | 0.016448 | 0.039926574 |
| HOXC4        | 12q13.13     | 0.122662 | 0.016458 | 0.039945994 |
| CELF5        | 19p13.3      | -0.12266 | 0.016462 | 0.039951772 |
| RASD2        | 22q12.3      | 0.122612 | 0.016502 | 0.040040086 |
| HLA-H        | 6p22.1       | 0.122611 | 0.016502 | 0.040040086 |
| KCNA2        | 1p13.3       | -0.12259 | 0.016519 | 0.040062493 |
| DSCAM        | 21q22.2      | -0.12259 | 0.01652  | 0.040062493 |
| PHACTR4      | 1p35.3       | 0.122589 | 0.016522 | 0.040062493 |
| COCH         | 14q12        | -0.12259 | 0.016523 | 0.040062493 |
| MORF4L2      | Xq22.2       | -0.12258 | 0.016527 | 0.040062493 |
| C1QTNF6      | 22q12.3      | -0.12258 | 0.016527 | 0.040062493 |
| SETD4        | 21q22.12     | -0.12258 | 0.016527 | 0.040062493 |
| FABP3        | 1p35.2       | -0.12258 | 0.016528 | 0.040062493 |
| VPS13C       | 15q22.2      | 0.12253  | 0.016574 | 0.040170467 |
| KTI12        | 1p32.3       | -0.12252 | 0.016581 | 0.040182342 |
| NKX3-1       | 8p21.2       | 0.122516 | 0.016587 | 0.040190965 |
| ACTRT3       | 3q26.2       | -0.12251 | 0.016594 | 0.040199843 |
| RFWD3        | 16q23.1      | -0.12251 | 0.016594 | 0.040199843 |
| GSTM2P1      | 6q21         | 0.122489 | 0.016611 | 0.040236128 |
| FAM225B      | 9q32         | -0.12248 | 0.016617 | 0.040245745 |
| SSRP1        | 11q12.1      | -0.12248 | 0.016619 | 0.040245745 |
| FGF12        | 3q28-q29     | -0.12247 | 0.016629 | 0.040265492 |
| C17ORF50     | 17q12        | 0.122408 | 0.016683 | 0.040391174 |
| SELENOS      | 15q26.3      | 0.122405 | 0.016686 | 0.040393397 |
| LBX1         | 10q24.32     | -0.12239 | 0.016696 | 0.040412398 |
| TMIE         | 3p21.31      | -0.12238 | 0.016709 | 0.040438441 |
| FAM133A      | Xq21.32      | -0.12235 | 0.016732 | 0.040488645 |
| PRNP         | 20p13        | -0.12235 | 0.016734 | 0.040488645 |
| PLPP7        | 9q34.13      | -0.12235 | 0.016736 | 0.040488645 |
| ELOVL2       | 6p24.2       | -0.12234 | 0.016744 | 0.040503375 |
| CD53         | 1p13.3       | 0.122336 | 0.016748 | 0.040508818 |
| COX6C        | 8q22.2       | -0.12233 | 0.016756 | 0.040517981 |
| CEP83        | 12q22        | -0.12233 | 0.016756 | 0.040517981 |
| ELOB         | 16p13.3      | -0.12231 | 0.01677  | 0.040546123 |
| PCDHB1       | 5q31.3       | 0.122301 | 0.016779 | 0.040565192 |
| FAM104A      | 17q25.1      | -0.12227 | 0.016809 | 0.040628283 |
| TACC2        | 10q26.13     | 0.122267 | 0.01681  | 0.040628283 |
| DSTYK        | 1q32.1       | -0.12227 | 0.016812 | 0.040628283 |
| TIAM2        | 6q25.2-q25.3 | 0.122176 | 0.016893 | 0.040819476 |
| LRRC70       | 5q12.1       | -0.12217 | 0.016899 | 0.04082866  |
| ARMC4        | 10p12.1      | -0.12215 | 0.016918 | 0.040871241 |
| LONRF1       | 8p23.1       | -0.12214 | 0.016923 | 0.040877307 |

|              |                    |          |          |             |
|--------------|--------------------|----------|----------|-------------|
| MNX1         | 7q36.3             | -0.12211 | 0.016949 | 0.040935162 |
| NEMP1        | 12q13.3            | -0.1221  | 0.016957 | 0.040950068 |
| ZW10         | 11q23.2            | -0.12209 | 0.016972 | 0.040981525 |
| CMTM8        | 3p22.3             | -0.12207 | 0.016987 | 0.041009478 |
| XYLB         | 3p22.2             | -0.12207 | 0.016988 | 0.041009478 |
| SRP9         | 1q42.12            | 0.122026 | 0.017029 | 0.041104454 |
| WDR73        | 15q25.2            | -0.12201 | 0.017041 | 0.041127475 |
| ARNT         | 1q21.3             | 0.121996 | 0.017056 | 0.041159997 |
| CHRNA1       | 2q31.1             | -0.12199 | 0.01706  | 0.04116304  |
| KLK14        | 19q13.41           | -0.12198 | 0.017067 | 0.041175289 |
| PIK3IP1      | 22q12.2            | -0.12197 | 0.017076 | 0.041191641 |
| AGPS         | 2q31.2             | 0.121965 | 0.017085 | 0.041208527 |
| ZNF275       | Xq28               | -0.12194 | 0.017103 | 0.04124776  |
| RIIAD1       | 1q21.3             | -0.12193 | 0.017119 | 0.04128107  |
| PPIL3        | 2q33.1             | -0.12191 | 0.017137 | 0.041319656 |
| KLF15        | 3q21.3             | 0.1219   | 0.017145 | 0.041333254 |
| CALML6       | 1p36.33            | -0.12188 | 0.017161 | 0.041366656 |
| TMEM158      | 3p21.31            | -0.12188 | 0.017163 | 0.041366656 |
| TM2D1        | 1p31.3             | -0.12187 | 0.01717  | 0.041375288 |
| PEX14        | 1p36.22            | -0.12187 | 0.01717  | 0.041375288 |
| SOCS1        | 16p13.13           | 0.121855 | 0.017185 | 0.041406548 |
| CHEK2        | 22q12.1            | -0.12185 | 0.01719  | 0.041413015 |
| TOMM7        | 7p15.3             | -0.12182 | 0.017214 | 0.041464829 |
| ADAMTS5      | 21q21.3            | -0.12181 | 0.017226 | 0.041488979 |
| PPIL1        | 6p21.2             | -0.1218  | 0.017234 | 0.041501591 |
| EIF3G        | 19p13.2            | -0.1218  | 0.017236 | 0.041501591 |
| SCRG1        | 4q34.1             | -0.1218  | 0.017239 | 0.041501591 |
| C3ORF20      | 3p25.1             | 0.121797 | 0.017239 | 0.041501591 |
| FAM153B      | 5q35.2             | 0.121788 | 0.017247 | 0.041515395 |
| SNRPF        | 12q23.1            | -0.12178 | 0.017259 | 0.041538132 |
| SLC38A4      | 12q13.11           | -0.12176 | 0.017273 | 0.041568887 |
| CCM2         | 7p13               | -0.12176 | 0.017277 | 0.041572413 |
| LINC00652    | 20p11.23           | -0.12175 | 0.017284 | 0.041584083 |
| GALE         | 1p36.11            | 0.121735 | 0.017296 | 0.041608859 |
| EPB41L4A-AS1 | 5q22.1             | -0.12172 | 0.017306 | 0.041627332 |
| WFDC1        | 16q24.1            | -0.12172 | 0.017313 | 0.041638144 |
| HLA-DRA      | 6p21.32            | 0.121695 | 0.017333 | 0.041682042 |
| PAGE4        | Xp11.23            | -0.12167 | 0.017355 | 0.04173043  |
| VPS39        | 15q15.1            | -0.12164 | 0.017385 | 0.041796875 |
| KCNF1        | 2p25.1             | -0.12164 | 0.017388 | 0.041798473 |
| SAXO1        | 9p22.1             | -0.12163 | 0.017392 | 0.041804955 |
| CHCHD3       | 7q32.3-q33         | -0.1216  | 0.017418 | 0.041862156 |
| CDK12        | 17q12              | -0.1216  | 0.017422 | 0.041866628 |
| CD99         | Xp22.33 and Yp11.2 | -0.1216  | 0.017425 | 0.041867569 |
| ZPBP2        | 17q21.1            | 0.121594 | 0.017427 | 0.041867569 |
| ZSCAN23      | 6p22.1             | -0.12154 | 0.017473 | 0.041973899 |
| ADCY7        | 16q12.1            | 0.121537 | 0.01748  | 0.041984987 |
| NMRAL1       | 16p13.3            | -0.12153 | 0.017489 | 0.042001672 |
| RTTN         | 18q22.2            | 0.121523 | 0.017493 | 0.042006291 |
| C1QL4        | 12q13.12           | -0.1215  | 0.017511 | 0.042045497 |
| SMG7         | 1q25.3             | -0.1215  | 0.017514 | 0.042045963 |
| KCNA1        | 12p13.32           | -0.12143 | 0.017582 | 0.042205929 |
| XRCC1        | 19q13.31           | -0.1214  | 0.017609 | 0.042264439 |
| WAS          | Xp11.23            | 0.121371 | 0.017636 | 0.04232445  |
| ADAMTS19     | 5q23.3             | -0.12137 | 0.017639 | 0.042326355 |
| CRADD        | 12q22              | 0.121354 | 0.017652 | 0.042351734 |
| HMX2         | 10q26.13           | -0.12135 | 0.017656 | 0.04235277  |
| SAMD4B       | 19q13.2            | -0.12135 | 0.017656 | 0.04235277  |

|            |                 |          |          |             |
|------------|-----------------|----------|----------|-------------|
| TSPYL5     | 8q22.1          | -0.12134 | 0.017669 | 0.042378336 |
| ZNF675     | 19p12           | -0.12131 | 0.017695 | 0.042436536 |
| PDGFRB     | 5q32            | -0.12129 | 0.017717 | 0.042482128 |
| COPS4      | 4q21.22         | 0.121275 | 0.017726 | 0.042500445 |
| GDAP2      | 1p12            | 0.121271 | 0.01773  | 0.042504623 |
| PSG4       | 19q13.31        | -0.12126 | 0.017743 | 0.042526153 |
| TFAP2E     | 1p34.3          | -0.12126 | 0.017743 | 0.042526153 |
| TRAF1      | 9q33.2          | -0.12124 | 0.017757 | 0.042553273 |
| DCAF12     | 9p13.3          | 0.121227 | 0.017772 | 0.042584315 |
| UQCRBP1    | Xp11.21         | -0.1212  | 0.017797 | 0.042639821 |
| KRTAP10-10 | 21q22.3         | -0.12119 | 0.017805 | 0.042654076 |
| GMPPA      | 2q35            | 0.121136 | 0.017858 | 0.042773849 |
| ADGRA3     | 4p15.2          | 0.121134 | 0.01786  | 0.042773849 |
| GRM3       | 7q21.11-q21.12  | -0.12111 | 0.017879 | 0.042815594 |
| STAG3L2    | 7q11.23         | -0.1211  | 0.017894 | 0.04284703  |
| HSBP1      | 16q23.3         | -0.12109 | 0.017899 | 0.04285222  |
| GIPC1      | 19p13.12        | 0.12108  | 0.017911 | 0.04287706  |
| SCAI       | 9q33.3          | -0.12108 | 0.017914 | 0.042877571 |
| TMEM86B    | 19q13.42        | 0.12105  | 0.01794  | 0.042936124 |
| FAM92A1P2  | 4q35.1          | -0.12103 | 0.017961 | 0.042979495 |
| BMPR1A     | 10q23.2         | -0.12101 | 0.017981 | 0.043022352 |
| SERGEF     | 11p15.1         | -0.12099 | 0.017997 | 0.043055585 |
| ANGPTL3    | 1p31.3          | -0.12099 | 0.017999 | 0.043055585 |
| ZNF367     | 9q22.32 9q22.32 | 0.120973 | 0.018014 | 0.043086801 |
| ADSSL1     | 14q32.33        | 0.12097  | 0.018017 | 0.04308804  |
| PHB        | 17q21.33        | -0.12095 | 0.018032 | 0.043120432 |
| DPY19L2    | 12q14.2         | -0.12095 | 0.018036 | 0.043124784 |
| FNBP1      | 9q34.11         | -0.12092 | 0.01806  | 0.043176322 |
| RMI1       | 9q21.32         | 0.120922 | 0.018062 | 0.043176837 |
| GSTA4      | 6p12.2          | -0.12091 | 0.018071 | 0.043186977 |
| SOX7       | 8p23.1          | -0.12091 | 0.018075 | 0.043186977 |
| IL1RL2     | 2q12.1          | 0.120909 | 0.018075 | 0.043186977 |
| CYP4F2     | 19p13.12        | -0.12091 | 0.018077 | 0.043186977 |
| CCL26      | 7q11.23         | 0.120906 | 0.018077 | 0.043186977 |
| SCUBE1     | 22q13.2         | 0.120889 | 0.018094 | 0.043221981 |
| HIST1H4D   | 6p22.2          | -0.12088 | 0.018102 | 0.043236579 |
| FGFBP2     | 4p15.32         | 0.120857 | 0.018125 | 0.04328403  |
| LOC90246   | 3q21.3          | 0.120853 | 0.018129 | 0.043288991 |
| TPGS2      | 18q12.2         | 0.120823 | 0.018158 | 0.043353231 |
| C1QBP      | 17p13.2         | 0.120815 | 0.018166 | 0.043367406 |
| ELOA       | 1p36.11         | 0.120791 | 0.018188 | 0.043415129 |
| NEDD4L     | 18q21.31        | 0.120789 | 0.01819  | 0.043415129 |
| CBX6       | 22q13.1         | -0.12077 | 0.01821  | 0.043458136 |
| OXCT2      | 1p34.2          | -0.12072 | 0.018256 | 0.043561896 |
| N4BP1      | 16q12.1         | 0.120714 | 0.018264 | 0.043574635 |
| RPL29P2    | 17p13.1         | -0.12068 | 0.018295 | 0.043645078 |
| TBC1D21    | 15q24.1         | 0.120674 | 0.018302 | 0.043655163 |
| GNAT3      | 7q21.11         | 0.120658 | 0.018318 | 0.04368836  |
| EGFR       | 7p11.2          | 0.12065  | 0.018325 | 0.043700465 |
| TBL1XR1    | 3q26.32         | 0.120609 | 0.018365 | 0.043787499 |
| MAD2L2     | 1p36.22         | -0.12061 | 0.018366 | 0.043787499 |
| UBXN10     | 1p36.12         | 0.120594 | 0.01838  | 0.043812432 |
| IFNL2      | 19q13.2         | -0.12059 | 0.018381 | 0.043812432 |
| JAG1       | 20p12.2         | 0.120578 | 0.018396 | 0.043842415 |
| GUF1       | 4p12            | 0.120558 | 0.018415 | 0.043882761 |
| GPHN       | 14q23.3-q24.1   | 0.120555 | 0.018418 | 0.043885572 |
| LGALS7     | 19q13.2         | -0.12055 | 0.018426 | 0.043898595 |
| VCAN       | 5q14.2-q14.3    | -0.1205  | 0.018471 | 0.04400154  |

|            |               |          |          |             |
|------------|---------------|----------|----------|-------------|
| SNX27      | 1q21.3        | 0.120491 | 0.018481 | 0.04401891  |
| MGAM       | 7q34          | 0.120479 | 0.018492 | 0.044037583 |
| ENPP5      | 6p21.1        | -0.12048 | 0.018493 | 0.044037583 |
| RDH11      | 14q24.1       | 0.120468 | 0.018503 | 0.04405748  |
| ABLIM3     | 5q32          | 0.120446 | 0.018524 | 0.044102036 |
| GTF2IRD2B  | 7q11.23       | -0.12044 | 0.01853  | 0.044109374 |
| ZNF799     | 19p13.2       | -0.12043 | 0.01854  | 0.044128292 |
| DLD        | 7q31.1        | 0.120385 | 0.018584 | 0.044229376 |
| TOE1       | 1p34.1        | 0.120357 | 0.018612 | 0.044285987 |
| PIH1D1     | 19q13.33      | 0.120357 | 0.018613 | 0.044285987 |
| MEOX2      | 7p21.2        | -0.12034 | 0.018627 | 0.04431082  |
| TFRC       | 3q29          | 0.120342 | 0.018627 | 0.04431082  |
| ANO10      | 3p22.1-p21.33 | 0.120332 | 0.018637 | 0.044328295 |
| DPYD       | 1p21.3        | 0.120284 | 0.018684 | 0.04443534  |
| KERA       | 12q21.33      | -0.12026 | 0.018707 | 0.044484731 |
| RSPH9      | 6p21.1        | -0.12025 | 0.018714 | 0.044495835 |
| POLE4      | 2p12          | -0.12024 | 0.018726 | 0.044519348 |
| HYPK       | 15q15.3       | -0.12023 | 0.018736 | 0.044537401 |
| MRPL38     | 17q25.1       | -0.12022 | 0.01875  | 0.044564598 |
| NLRX1      | 11q23.3       | 0.120179 | 0.018788 | 0.044650257 |
| BRICD5     | 16p13.3       | -0.12014 | 0.018827 | 0.044737077 |
| MINDY2     | 15q21.3-q22.1 | 0.120133 | 0.018834 | 0.044749089 |
| C17ORF107  | 17p13.2       | 0.120123 | 0.018844 | 0.044763949 |
| WDR82      | 3p21.2        | -0.12012 | 0.018845 | 0.044763949 |
| ARID3C     | 9p13.3        | 0.120107 | 0.01886  | 0.044795516 |
| CTAGE6     | 7q35          | 0.120099 | 0.018868 | 0.044809349 |
| NRG4       | 15q24.2       | 0.120061 | 0.018906 | 0.044894336 |
| POLR2J2    | 7q22.1        | -0.12006 | 0.018909 | 0.044894475 |
| OMP        | 11q13.5       | 0.120052 | 0.018915 | 0.044903902 |
| PRSS22     | 16p13.3       | -0.12005 | 0.01892  | 0.044911422 |
| NCR3       | 6p21.33       | 0.120035 | 0.018932 | 0.044934497 |
| FTO        | 16q12.2       | -0.12003 | 0.018937 | 0.044941429 |
| ZFAND4     | 10q11.22      | -0.12002 | 0.018943 | 0.044949399 |
| EEF2       | 19p13.3       | 0.119993 | 0.018974 | 0.045017248 |
| ZNF217     | 20q13.2       | -0.11997 | 0.018997 | 0.045062929 |
| ACVR2B-AS1 | 3p22.2        | -0.11997 | 0.018998 | 0.045062929 |
| ING4       | 12p13.31      | -0.11996 | 0.019009 | 0.045082089 |
| CYP27C1    | 2q14.3        | -0.11996 | 0.01901  | 0.045082089 |
| CARNMT1    | 9q21.13       | 0.119953 | 0.019015 | 0.045087412 |
| XCL2       | 1q24.2        | 0.119929 | 0.019038 | 0.045134694 |
| SLC10A5    | 8q21.13       | 0.119928 | 0.019039 | 0.045134694 |
| FATE1      | Xq28          | -0.11992 | 0.019047 | 0.045147505 |
| MFAP3      | 5q33.2        | 0.119884 | 0.019084 | 0.045229295 |
| EME1       | 17q21.33      | -0.11988 | 0.019091 | 0.045240395 |
| GTF2A1L    | 2p16.3        | -0.11987 | 0.019096 | 0.045249044 |
| ACKR2      | 3p22.1        | 0.119858 | 0.01911  | 0.045276735 |
| CHIC1      | Xq13.2        | 0.119851 | 0.019117 | 0.045287603 |
| ALLC       | 2p25.3        | -0.11983 | 0.019141 | 0.045337641 |
| DHX30      | 3p21.31       | -0.11983 | 0.019143 | 0.045337641 |
| FERMT1     | 20p12.3       | -0.11981 | 0.01916  | 0.045372986 |
| LYZL6      | 17q12         | 0.119804 | 0.019165 | 0.045378972 |
| PRRT3      | 3p25.3        | -0.1198  | 0.019168 | 0.045380798 |
| RPL10L     | 14q21.2       | 0.119794 | 0.019174 | 0.045390593 |
| MIS12      | 17p13.2       | 0.119787 | 0.019182 | 0.045403083 |
| ZNF879     | 5q35.3        | -0.11978 | 0.019187 | 0.045409064 |
| TNKS1BP1   | 11q12.1       | 0.119777 | 0.019191 | 0.045415045 |
| FAM13C     | 10q21.1       | -0.11977 | 0.019195 | 0.045418448 |
| RCSD1      | 1q24.2        | 0.119767 | 0.019202 | 0.045429591 |

|           |               |          |          |             |
|-----------|---------------|----------|----------|-------------|
| DAD1P1    | 12p12.1       | -0.11976 | 0.019211 | 0.045444287 |
| MRPL42P5  | 15q15.1       | -0.11974 | 0.019228 | 0.045480919 |
| DOK2      | 8p21.3        | 0.119719 | 0.01925  | 0.045527608 |
| TRIM11    | 1q42.13       | 0.1197   | 0.019269 | 0.045567217 |
| OLFML2B   | 1q23.3        | -0.11961 | 0.019362 | 0.045776718 |
| SH2D3A    | 19p13.3       | 0.119609 | 0.019363 | 0.045776718 |
| SGK1      | 6q23.2        | 0.119604 | 0.019367 | 0.04578222  |
| PSMD1     | 2q37.1        | 0.119542 | 0.019431 | 0.045927638 |
| CSNK1G1   | 15q22.31      | 0.119515 | 0.019459 | 0.045988396 |
| P2RX3     | 11q12.1       | -0.11951 | 0.019468 | 0.046003174 |
| UQCC2     | 6p21.31       | -0.1195  | 0.019473 | 0.046009874 |
| IL25      | 14q11.2       | -0.1195  | 0.019476 | 0.046012549 |
| SPRYD7    | 13q14.2       | -0.11948 | 0.01949  | 0.046040755 |
| HOXC5     | 12q13.13      | 0.119473 | 0.019502 | 0.046061812 |
| HPS1      | 10q24.2       | 0.119413 | 0.019564 | 0.046200365 |
| TBX21     | 17q21.32      | 0.11941  | 0.019567 | 0.046200365 |
| DBN1      | 5q35.3        | -0.11941 | 0.019567 | 0.046200365 |
| CEP162    | 6q14.2-q14.3  | -0.11941 | 0.019571 | 0.046203293 |
| RMDN1     | 8q21.3        | -0.1194  | 0.019579 | 0.046216693 |
| PCMTD1    | 8q11.23       | -0.11939 | 0.019584 | 0.046224859 |
| ITLN2     | 1q23.3        | 0.119383 | 0.019594 | 0.046242843 |
| SATB2-AS1 | 2q33.1        | -0.11937 | 0.019603 | 0.046253266 |
| B3GNT4    | 12q24.31      | 0.119374 | 0.019603 | 0.046253266 |
| ZNF669    | 1q44          | -0.11935 | 0.019632 | 0.046314681 |
| ABL1      | 9q34.12       | -0.11933 | 0.019648 | 0.046348049 |
| BEND6     | 6p12.1        | -0.11932 | 0.019664 | 0.04637545  |
| FKBP15    | 9q32          | 0.119315 | 0.019664 | 0.04637545  |
| STAB2     | 12q23.3       | 0.119309 | 0.01967  | 0.046383905 |
| GAD1      | 2q31.1        | 0.119304 | 0.019676 | 0.046390051 |
| ASB13     | 10p15.1       | -0.1193  | 0.019678 | 0.046390051 |
| DOK6      | 18q22.2       | -0.11927 | 0.019714 | 0.046469978 |
| C12ORF60  | 12p13.1-p12.3 | -0.11924 | 0.019746 | 0.046539521 |
| B3GAT3    | 11q12.3       | -0.11922 | 0.019764 | 0.046574924 |
| CHRM3     | 1q43          | -0.11922 | 0.019765 | 0.046574924 |
| ADGRG2    | Xp22.13       | -0.11921 | 0.019777 | 0.046598103 |
| PHF19     | 9q33.2        | -0.1192  | 0.019784 | 0.046608768 |
| ATAD2B    | 2p24.1-p23.3  | -0.11916 | 0.019826 | 0.0467025   |
| XAB2      | 19p13.2       | -0.11912 | 0.019867 | 0.046792689 |
| PLXNA4    | 7q32.3        | -0.11911 | 0.019877 | 0.046810188 |
| VCX3A     | Xp22.31       | -0.1191  | 0.019888 | 0.046832051 |
| SLX1B     | 16p11.2       | 0.119087 | 0.019901 | 0.04685717  |
| DNAJC13   | 3q22.1        | 0.119065 | 0.019924 | 0.046905712 |
| MSLN      | 16p13.3       | 0.119025 | 0.019967 | 0.046999422 |
| DNAJC7    | 17q21.2       | -0.11902 | 0.019971 | 0.04700452  |
| MRPL35    | 2p11.2        | 0.119017 | 0.019975 | 0.047008025 |
| TMEM145   | 19q13.2       | -0.11901 | 0.019984 | 0.047023007 |
| CCDC14    | 3q21.1        | -0.11901 | 0.019986 | 0.047023007 |
| HRC       | 19q13.33      | -0.11896 | 0.020035 | 0.04713267  |
| STOX1     | 10q22.1       | -0.11896 | 0.020037 | 0.04713267  |
| AIPL1     | 17p13.2       | 0.118951 | 0.020045 | 0.047144369 |
| DHRS4-AS1 | 14q11.2       | 0.118943 | 0.020052 | 0.047156739 |
| ZMYM4     | 1p34.3        | -0.11894 | 0.02006  | 0.047168245 |
| ZNF444    | 19q13.43      | -0.11892 | 0.020075 | 0.047198937 |
| KMT5C     | 19q13.42      | -0.11891 | 0.020086 | 0.047219515 |
| DAW1      | 2q36.3        | -0.11887 | 0.02013  | 0.04731623  |
| RINL      | 19q13.2       | -0.11886 | 0.020142 | 0.047340786 |
| FSTL3     | 19p13.3       | -0.11884 | 0.020163 | 0.047384406 |
| DMRT3     | 9p24.3        | -0.11881 | 0.020191 | 0.04744352  |



|            |                 |          |          |             |
|------------|-----------------|----------|----------|-------------|
| LYZL2      | 10p11.23        | -0.1188  | 0.020203 | 0.04746568  |
| ADCY10     | 1q24.2          | 0.118795 | 0.020209 | 0.047474166 |
| RBM20      | 10q25.2         | -0.11877 | 0.020233 | 0.047525124 |
| FAM184A    | 6q22.31         | -0.11876 | 0.020243 | 0.047544356 |
| LEF1       | 4q25            | -0.11876 | 0.020247 | 0.047547538 |
| MSH5       | 6p21.33         | -0.11875 | 0.020259 | 0.047570391 |
| RBM10      | Xp11.3          | -0.11873 | 0.020277 | 0.047606674 |
| MFSD6L     | 17p13.1         | 0.118714 | 0.020295 | 0.047642696 |
| NLRP11     | 19q13.42-q13.43 | -0.1187  | 0.020307 | 0.047665119 |
| NHLRC1     | 6p22.3          | -0.1187  | 0.020309 | 0.047665123 |
| GOLGA7     | 8p11.21         | -0.11869 | 0.020322 | 0.047690713 |
| C5ORF51    | 5p13.1          | 0.118669 | 0.020343 | 0.047732992 |
| PBX1       | 1q23.3          | -0.11866 | 0.020355 | 0.047756998 |
| ARHGEF11   | 1q23.1          | 0.118654 | 0.020359 | 0.047760016 |
| HOXB7      | 17q21.32        | 0.118651 | 0.020362 | 0.04776142  |
| TSPYL1     | 6q22.1          | 0.118644 | 0.02037  | 0.047774131 |
| USHBP1     | 19p13.11        | -0.11862 | 0.020399 | 0.04783803  |
| SFTPD      | 10q22.3         | -0.11861 | 0.020409 | 0.047854089 |
| ANKRD36BP2 | 2p11.2          | 0.118589 | 0.020428 | 0.047889499 |
| TEFM       | 17q11.2         | -0.11859 | 0.02043  | 0.047889499 |
| UBE2A      | Xq24            | -0.11859 | 0.020431 | 0.047889499 |
| HTR3E      | 3q27.1          | 0.118582 | 0.020435 | 0.047894658 |
| C11ORF49   | 11p11.2         | -0.11857 | 0.020445 | 0.047910665 |
| ZNF692     | 1q44            | -0.11856 | 0.020458 | 0.047936095 |
| CCSER1     | 4q22.1          | 0.118559 | 0.02046  | 0.047936095 |
| DCUN1D1    | 3q26.33         | 0.118556 | 0.020463 | 0.047937571 |
| TCOF1      | 5q32-q33.1      | -0.11854 | 0.020483 | 0.047978414 |
| TAL2       | 9q31.2          | -0.11853 | 0.020491 | 0.047990388 |
| FBP1       | 9q22.32         | 0.118513 | 0.020509 | 0.048028812 |
| AXL        | 19q13.2         | -0.1185  | 0.020524 | 0.048056734 |
| CNTNAP1    | 17q21.2         | -0.11845 | 0.020578 | 0.048177859 |
| LRTM1      | 3p14.3          | 0.118445 | 0.020582 | 0.048182628 |
| LARP4B     | 10p15.3         | 0.118424 | 0.020605 | 0.048230063 |
| OR2A1      | 7q35            | -0.11841 | 0.020619 | 0.048256789 |
| VPS45      | 1q21.2          | 0.118409 | 0.020621 | 0.048256789 |
| CTSO       | 4q32.1          | 0.11837  | 0.020663 | 0.048349509 |
| ZNF507     | 19q13.11        | -0.11835 | 0.020684 | 0.048391194 |
| RAB4A      | 1q42.13         | 0.118343 | 0.020693 | 0.048407859 |
| TPI1       | 12p13.31        | 0.118327 | 0.02071  | 0.048442504 |
| RBX1       | 22q13.2         | -0.11832 | 0.020722 | 0.04846061  |
| SLC25A19   | 17q25.1         | -0.11831 | 0.020723 | 0.04846061  |
| TREML1     | 6p21.1          | 0.118288 | 0.020752 | 0.048523508 |
| TARS       | 5p13.3          | -0.11828 | 0.020762 | 0.048540899 |
| TEX43      | 5q23.2          | -0.11827 | 0.020769 | 0.048550478 |
| KIF21B     | 1q32.1          | 0.11826  | 0.020782 | 0.048575962 |
| COL5A2     | 2q32.2          | -0.11823 | 0.020813 | 0.048644047 |
| GAGE12J    | Xp11.23         | -0.11821 | 0.020835 | 0.048688926 |
| OVGP1      | 1p13.2          | -0.11819 | 0.02086  | 0.048741824 |
| NAAA       | 4q21.1          | 0.118169 | 0.020881 | 0.048785182 |
| ATP8B4     | 15q21.2         | 0.118072 | 0.020987 | 0.049027172 |
| BICD1      | 12p11.21        | -0.11806 | 0.021001 | 0.049054483 |
| UBAP1L     | 15q22.31        | -0.11805 | 0.021017 | 0.049084901 |
| DCN        | 12q21.33        | -0.11803 | 0.021035 | 0.049121271 |
| NOVA2      | 19q13.32        | -0.11802 | 0.021041 | 0.049130429 |
| CWC22      | 2q31.3          | -0.11801 | 0.021057 | 0.049160333 |
| LRRC15     | 3q29            | -0.11801 | 0.021059 | 0.049160333 |
| ADO        | 10q21.3         | -0.118   | 0.021069 | 0.049178877 |
| CASR       | 3q13.33-q21.1   | 0.117957 | 0.021114 | 0.04927636  |

|           |          |          |          |             |
|-----------|----------|----------|----------|-------------|
| SYNCRIP   | 6q14.3   | -0.11794 | 0.021131 | 0.049311587 |
| POLR3H    | 22q13.2  | -0.11791 | 0.021169 | 0.049394948 |
| MRPL58    | 17q25.1  | -0.1179  | 0.021178 | 0.049409134 |
| UNC5D     | 8p12     | 0.117882 | 0.021196 | 0.049445564 |
| SLC25A33  | 1p36.22  | -0.11788 | 0.021201 | 0.049452486 |
| DDX19B    | 16q22.1  | -0.11787 | 0.021208 | 0.04946336  |
| SYPL2     | 1p13.3   | -0.11784 | 0.021242 | 0.049535505 |
| TP53INP1  | 8q22.1   | 0.117825 | 0.021259 | 0.049568938 |
| PPM1G     | 2p23.3   | -0.11782 | 0.021262 | 0.0495715   |
| MBD5      | 2q23.1   | -0.11781 | 0.021276 | 0.049597957 |
| CREG2     | 2q11.2   | 0.1178   | 0.021287 | 0.049616932 |
| ATXN7     | 3p14.1   | 0.117787 | 0.021301 | 0.049645343 |
| METTL27   | 7q11.23  | -0.11777 | 0.021319 | 0.049680738 |
| ZC3H13    | 13q14.13 | -0.11776 | 0.021336 | 0.04971504  |
| MFAP5     | 12p13.31 | -0.11774 | 0.021351 | 0.049738561 |
| SAP30L    | 5q33.2   | 0.117742 | 0.021351 | 0.049738561 |
| CCDC39    | 3q26.33  | -0.11773 | 0.021359 | 0.04975167  |
| ALPK3     | 15q25.3  | -0.11771 | 0.021386 | 0.049808369 |
| SLC5A12   | 11p14.2  | -0.11771 | 0.02139  | 0.049812424 |
| KCNIP2    | 10q24.32 | -0.1177  | 0.021393 | 0.049813486 |
| ARHGAP11B | 15q13.2  | 0.11769  | 0.021409 | 0.049843992 |
| LAMP1     | 13q34    | -0.11764 | 0.021467 | 0.049968134 |
| SPACA1    | 6q15     | -0.11764 | 0.021467 | 0.049968134 |
| GPD1      | 12q13.12 | 0.117625 | 0.021481 | 0.049994489 |
| CWF19L1   | 10q24.31 | -0.11758 | 0.021527 | 0.050095932 |
| ZNF45     | 19q13.31 | 0.117579 | 0.021533 | 0.050103003 |
| GPR1      | 2q33.3   | -0.11756 | 0.021551 | 0.050139289 |
| PWWP2A    | 5q33.3   | 0.117551 | 0.021565 | 0.050165387 |
| SNX15     | 11q13.1  | -0.11755 | 0.02157  | 0.050172467 |
| RBM3      | Xp11.23  | -0.11751 | 0.021615 | 0.050271107 |
| TRIM44    | 11p13    | -0.1175  | 0.021623 | 0.050283259 |
| TPPP2     | 14q11.2  | -0.11748 | 0.021642 | 0.050322933 |
| DPYSL3    | 5q32     | -0.11746 | 0.021672 | 0.050385809 |
| ZBTB44    | 11q24.3  | -0.11745 | 0.021681 | 0.050399807 |
| CYP7A1    | 8q12.1   | 0.117444 | 0.021684 | 0.050399807 |
| RHBDF2    | 17q25.1  | -0.11744 | 0.021685 | 0.050399807 |
| LSP1      | 11p15.5  | 0.117426 | 0.021705 | 0.050439038 |
| OAZ3      | 1q21.3   | 0.117423 | 0.021708 | 0.050439636 |
| ODF3L2    | 19p13.3  | -0.11742 | 0.02171  | 0.050439757 |
| ACTN2     | 1q43     | -0.11742 | 0.021716 | 0.050444382 |
| TMEM63A   | 1q42.12  | -0.11741 | 0.021717 | 0.050444382 |
| TMEM129   | 4p16.3   | 0.117408 | 0.021725 | 0.050457136 |
| GPATCH2   | 1q41     | -0.11738 | 0.021753 | 0.050507266 |
| ZNF397    | 18q12.2  | 0.117382 | 0.021754 | 0.050507266 |
| C10ORF95  | 10q24.32 | 0.117382 | 0.021754 | 0.050507266 |
| SLC46A2   | 9q32     | -0.11737 | 0.021771 | 0.050539564 |
| TIMM22    | 17p13.3  | 0.117365 | 0.021773 | 0.050539564 |
| NMNAT2    | 1q25.3   | -0.11734 | 0.021803 | 0.050597905 |
| WFS1      | 4p16.1   | -0.11734 | 0.021804 | 0.050597905 |
| MRFAP1    | 4p16.1   | 0.117312 | 0.021833 | 0.050660459 |
| NTHL1     | 16p13.3  | -0.11727 | 0.021881 | 0.050760822 |
| SH2B2     | 7q22.1   | -0.11727 | 0.021881 | 0.050760822 |
| TNKS      | 8p23.1   | 0.117223 | 0.021935 | 0.050878601 |
| ANKRD53   | 2p13.3   | -0.11721 | 0.021954 | 0.05091706  |
| ZNF75D    | Xq26.3   | -0.11718 | 0.021978 | 0.050966819 |
| RIMBP2    | 12q24.33 | -0.11718 | 0.021986 | 0.050978815 |
| TMEM108   | 3q22.1   | -0.11717 | 0.021995 | 0.050996035 |
| IRAK2     | 3p25.3   | -0.11717 | 0.021999 | 0.050998598 |

|             |                    |          |          |             |
|-------------|--------------------|----------|----------|-------------|
| RTN4        | 2p16.1             | -0.11716 | 0.022005 | 0.051006919 |
| OR2T10      | 1q44               | -0.11716 | 0.02201  | 0.051012053 |
| ELF4        | Xq26.1             | -0.11711 | 0.022069 | 0.051142642 |
| SLC25A5-AS1 | Xq24               | -0.1171  | 0.02208  | 0.051162962 |
| RTL1        | 14q32.2            | -0.11709 | 0.022087 | 0.051173516 |
| FAM32A      | 19p13.11           | -0.11708 | 0.022096 | 0.051187428 |
| MFSD3       | 8q24.3             | -0.11708 | 0.022098 | 0.051187428 |
| OXSR1       | 3p22.2             | 0.11706  | 0.02212  | 0.051231746 |
| DDI2        | 1p36.21            | 0.117027 | 0.022158 | 0.051307686 |
| TMEM217     | 6p21.2             | -0.11703 | 0.022161 | 0.051307686 |
| CCDC43      | 17q21.31           | -0.11703 | 0.022161 | 0.051307686 |
| RAF1        | 3p25.2             | 0.116984 | 0.022207 | 0.051407414 |
| WARS2       | 1p12               | 0.116983 | 0.022209 | 0.051407414 |
| ATE1        | 10q26.13           | 0.116974 | 0.022219 | 0.051425532 |
| INA         | 10q24.33           | -0.11696 | 0.022239 | 0.051465493 |
| ZFP69       | 1p34.2             | -0.11695 | 0.02225  | 0.051483844 |
| CLCN5       | Xp11.23            | -0.11694 | 0.022256 | 0.051493684 |
| SALL3       | 18q23              | -0.11691 | 0.02229  | 0.051565492 |
| COL1A2      | 7q21.3             | -0.1169  | 0.022299 | 0.051581079 |
| MYD88       | 3p22.2             | 0.116898 | 0.022307 | 0.051592355 |
| C22ORF39    | 22q11.21           | -0.11689 | 0.022317 | 0.051609954 |
| KLHL29      | 2p24.1             | -0.11689 | 0.022321 | 0.051614339 |
| GAP43       | 3q13.31            | -0.11687 | 0.022336 | 0.051641571 |
| DUSP12      | 1q23.3             | -0.11686 | 0.022346 | 0.051660178 |
| SDR39U1     | 14q12              | -0.11686 | 0.02235  | 0.051662149 |
| OR2AE1      | 7q22.1             | 0.116857 | 0.022354 | 0.051662149 |
| AARSD1      | 17q21.31           | -0.11686 | 0.022355 | 0.051662149 |
| CRIPAK      | 4p16.3             | 0.116853 | 0.022359 | 0.05166539  |
| AKAP7       | 6q23.2             | 0.116807 | 0.022413 | 0.051783199 |
| PCDH9       | 13q21.32           | -0.1168  | 0.022424 | 0.051804331 |
| CD4         | 12p13.31           | 0.116793 | 0.022428 | 0.051807561 |
| MTMR11      | 1q21.2             | 0.116788 | 0.022434 | 0.051815422 |
| CCR5        | 3p21.31            | 0.116774 | 0.022451 | 0.05184693  |
| STXBP5L     | 3q13.33            | -0.11674 | 0.022494 | 0.051940455 |
| PIMREG      | 17p13.2            | 0.116717 | 0.022516 | 0.051986265 |
| PLPBP       | 8p11.23            | 0.116702 | 0.022534 | 0.052022489 |
| CENPE       | 4q24               | 0.116615 | 0.022636 | 0.052250639 |
| OR7E156P    | 13q21.31           | -0.11659 | 0.022667 | 0.052316509 |
| FBXW2       | 9q33.2             | 0.116572 | 0.022686 | 0.052354821 |
| IL12RB2     | 1p31.3             | 0.116565 | 0.022694 | 0.052367028 |
| SLC12A3     | 16q13              | 0.116551 | 0.02271  | 0.052398279 |
| DHTKD1      | 10p14              | 0.116544 | 0.022718 | 0.052410621 |
| UQCRB       | 8q22.1             | -0.11654 | 0.022729 | 0.052429621 |
| SMYD4       | 17p13.3            | 0.11652  | 0.022746 | 0.052463192 |
| RPH3A       | 12q24.13           | -0.1165  | 0.022766 | 0.052503858 |
| ZNF772      | 19q13.43           | -0.11649 | 0.022786 | 0.052537757 |
| ASMTL-AS1   | Xp22.33 and Yp11.2 | -0.11649 | 0.022786 | 0.052537757 |
| GCFC2       | 2p12               | -0.11646 | 0.022814 | 0.052595906 |
| RIN1        | 11q13.2            | 0.116457 | 0.022821 | 0.05260445  |
| CES4A       | 16q22.1            | -0.11644 | 0.022838 | 0.052637007 |
| RNF13       | 3q25.1             | -0.11644 | 0.02284  | 0.052637007 |
| PIH1D3      | Xq22.3             | 0.116424 | 0.022859 | 0.052675033 |
| PAMR1       | 11p13              | -0.11639 | 0.022899 | 0.052760294 |
| C10ORF55    | 10q22.2            | -0.11635 | 0.022952 | 0.05287237  |
| SLC25A16    | 10q21.3            | 0.116345 | 0.022953 | 0.05287237  |
| TNPO3       | 7q32.1             | -0.11633 | 0.022967 | 0.052898552 |
| PLEKHF1     | 19q12              | -0.11633 | 0.022975 | 0.05291242  |
| COX5A       | 15q24.2            | 0.116319 | 0.022984 | 0.052926877 |

|           |              |          |          |             |
|-----------|--------------|----------|----------|-------------|
| UPK1B     | 3q13.32      | 0.116302 | 0.023003 | 0.052965036 |
| F5        | 1q24.2       | 0.116298 | 0.023009 | 0.052971662 |
| NAP1L6    | Xq13.2       | -0.11629 | 0.023023 | 0.052998302 |
| CASD1     | 7q21.3       | 0.11626  | 0.023054 | 0.053063522 |
| FIGNL1    | 7p12.2       | -0.11625 | 0.023061 | 0.05307272  |
| TTPA      | 8q12.3       | -0.11624 | 0.023076 | 0.053095828 |
| IL17RA    | 22q11.1      | 0.116241 | 0.023076 | 0.053095828 |
| SULF1     | 8q13.2-q13.3 | -0.11623 | 0.023083 | 0.053106209 |
| TUFT1     | 1q21.3       | -0.11623 | 0.023087 | 0.053107141 |
| RFPL1     | 22q12.2      | -0.11623 | 0.023089 | 0.053107141 |
| ABCC6P2   | 16p13.11     | -0.11621 | 0.02311  | 0.053145985 |
| NXT2      | Xq23         | -0.11621 | 0.023111 | 0.053145985 |
| KIFC2     | 8q24.3       | -0.11621 | 0.023118 | 0.053154608 |
| PTPN12    | 7q11.23      | -0.1162  | 0.023126 | 0.053166768 |
| HEXIM2    | 17q21.31     | -0.11618 | 0.023151 | 0.053219604 |
| CFAP221   | 2q14.2       | 0.116152 | 0.023182 | 0.053283197 |
| ARHGAP1   | 11p11.2      | 0.116144 | 0.023192 | 0.053291117 |
| OR6X1     | 11q24.1      | -0.11614 | 0.023195 | 0.053291117 |
| DNAJB13   | 11q13.4      | -0.11614 | 0.023195 | 0.053291117 |
| CENPM     | 22q13.2      | 0.116141 | 0.023196 | 0.053291117 |
| RXRG      | 1q23.3       | -0.11613 | 0.023211 | 0.053318788 |
| PKD1L2    | 16q23.2      | -0.11613 | 0.023213 | 0.053318788 |
| ZNF804A   | 2q32.1       | 0.116116 | 0.023225 | 0.053340897 |
| RGS1      | 1q31.2       | 0.116113 | 0.023229 | 0.053342837 |
| CD37      | 19q13.33     | 0.116094 | 0.023251 | 0.053379355 |
| GLP1R     | 6p21.2       | -0.11609 | 0.023252 | 0.053379355 |
| GPR173    | Xp11.22      | -0.11609 | 0.023253 | 0.053379355 |
| PIK3R6    | 17p13.1      | 0.116074 | 0.023275 | 0.053425043 |
| STPG3     | 9q34.3       | -0.11606 | 0.023297 | 0.053469688 |
| MRPL3     | 3q22.1       | -0.11604 | 0.023319 | 0.053514322 |
| EIF4B     | 12q13.13     | 0.116015 | 0.023346 | 0.053569227 |
| BLOC1S5   | 6p24.3       | -0.116   | 0.023368 | 0.053612906 |
| ZNF394    | 7q22.1       | -0.11599 | 0.02338  | 0.053635839 |
| SOCS2     | 12q22        | 0.115957 | 0.023416 | 0.053711049 |
| HCLS1     | 3q13.33      | 0.115953 | 0.023421 | 0.053715593 |
| NDUFB7    | 19p13.12     | -0.11595 | 0.02343  | 0.053730242 |
| TMEM222   | 1p36.11      | -0.11594 | 0.023442 | 0.053751434 |
| RPS6KB2   | 11q13.2      | -0.11593 | 0.023449 | 0.053762523 |
| ZNF670    | 1q44         | -0.11592 | 0.023457 | 0.053773614 |
| CCDC184   | 12q13.11     | -0.1159  | 0.023485 | 0.053831702 |
| PCDHGB5   | 5q31.3       | -0.11589 | 0.023501 | 0.053862737 |
| NDUFAF5   | 20p12.1      | -0.11588 | 0.023504 | 0.053863457 |
| STX7      | 6q23.2       | 0.11587  | 0.023521 | 0.053896015 |
| TAS2R42   | 12p13.2      | -0.11586 | 0.023535 | 0.053922748 |
| SNORA71A  | 20q11.23     | -0.11585 | 0.023549 | 0.05394806  |
| PEF1      | 1p35.2       | 0.115843 | 0.023553 | 0.053952027 |
| TTLL1     | 22q13.2      | -0.11584 | 0.023559 | 0.053958978 |
| DGCR5     | 22q11.21     | -0.11583 | 0.023568 | 0.053968335 |
| SLC12A2   | 5q23.3       | 0.115829 | 0.02357  | 0.053968335 |
| DCANP1    | 5q31.1       | 0.115828 | 0.023571 | 0.053968335 |
| DHRS4L2   | 14q11.2      | 0.115826 | 0.023574 | 0.053968893 |
| MED25     | 19q13.33     | -0.11582 | 0.023579 | 0.053972865 |
| ACP4      | 19q13.33     | -0.1158  | 0.0236   | 0.05401645  |
| EXO5      | 1p34.2       | -0.11577 | 0.023636 | 0.054091877 |
| HOXA11-AS | 7p15.2       | -0.11577 | 0.023645 | 0.054106017 |
| TPRG1     | 3q28         | 0.115754 | 0.023661 | 0.054134309 |
| PTGR1     | 9q31.3       | 0.115753 | 0.023663 | 0.054134309 |
| SENP5     | 3q29         | -0.11574 | 0.023673 | 0.054149454 |

|           |              |          |          |             |
|-----------|--------------|----------|----------|-------------|
| TRIM47    | 17q25.1      | 0.115743 | 0.023675 | 0.054149454 |
| TKFC      | 11q12.2      | -0.1157  | 0.023721 | 0.05424842  |
| PELO      | 5q11.2       | 0.115703 | 0.023723 | 0.05424842  |
| FAM155A   | 13q33.3      | -0.1157  | 0.023733 | 0.054263195 |
| DTHD1     | 4p14         | 0.115689 | 0.02374  | 0.054274233 |
| CEACAM22P | 19q13.31     | 0.115657 | 0.02378  | 0.05435857  |
| COL6A4P1  | 3p25.1       | -0.11564 | 0.023803 | 0.054405776 |
| HLA-A     | 6p22.1       | 0.115627 | 0.023815 | 0.054427378 |
| BAG2      | 6p12.1       | -0.11558 | 0.023871 | 0.054548039 |
| RPL5      | 1p22.1       | -0.11557 | 0.02389  | 0.054586968 |
| LINC00893 | Xq28         | -0.11556 | 0.023894 | 0.054589757 |
| MSH2      | 2p21-p16.3   | -0.11555 | 0.023908 | 0.054615473 |
| CBL       | 11q23.3      | -0.11555 | 0.023916 | 0.054625795 |
| RPA2      | 1p35.3       | -0.1155  | 0.023972 | 0.05474775  |
| CEPT1     | 1p13.3       | 0.115495 | 0.023978 | 0.054755393 |
| LINC01959 | 5q31.1       | -0.11549 | 0.023986 | 0.054766682 |
| DNAAF2    | 14q21.3      | -0.11549 | 0.023989 | 0.054768872 |
| DCAF8L1   | Xp21.3       | 0.115474 | 0.024003 | 0.054794928 |
| DCPS      | 11q24.2      | 0.11547  | 0.024008 | 0.054796047 |
| CARHSP1   | 16p13.2      | -0.11547 | 0.024009 | 0.054796047 |
| ZNF552    | 19q13.43     | 0.115467 | 0.024012 | 0.054796431 |
| PSMF1     | 20p13        | -0.11546 | 0.02402  | 0.054804689 |
| MAEL      | 1q24.1       | -0.11546 | 0.024021 | 0.054804689 |
| C1QL1     | 17q21.31     | -0.11544 | 0.02404  | 0.054841703 |
| IQCE      | 7p22.3       | 0.115428 | 0.02406  | 0.054879954 |
| FAM47B    | Xp21.1       | -0.11537 | 0.024126 | 0.055025563 |
| RNMT      | 18p11.21     | 0.115367 | 0.024136 | 0.055040368 |
| HCRTR2    | 6p12.1       | -0.11536 | 0.024145 | 0.055055871 |
| ATG4D     | 19p13.2      | 0.115353 | 0.024153 | 0.055067256 |
| FLOT1     | 6p21.33      | -0.11535 | 0.024157 | 0.055070087 |
| FBXO16    | 8p21.1       | 0.115335 | 0.024175 | 0.055099417 |
| MOGAT3    | 7q22.1       | -0.11533 | 0.024175 | 0.055099417 |
| NEDD8     | 14q12        | -0.11533 | 0.024184 | 0.055113783 |
| SRD5A2    | 2p23.1       | -0.11529 | 0.024236 | 0.055225185 |
| HOXC9     | 12q13.13     | 0.115246 | 0.024285 | 0.055330441 |
| TLCD3B    | 16p11.2      | 0.115236 | 0.024297 | 0.055348938 |
| CD8B      | 2p11.2       | -0.11524 | 0.024299 | 0.055348938 |
| WEE1      | 11p15.4      | -0.11523 | 0.024304 | 0.055354828 |
| TBX2      | 17q23.2      | -0.11519 | 0.02436  | 0.055475378 |
| NFATC1    | 18q23        | 0.115175 | 0.024374 | 0.055500817 |
| SCX       | 8q24.3       | -0.11516 | 0.024389 | 0.055527285 |
| RNASEK    | 17p13.1      | 0.115161 | 0.024391 | 0.055527285 |
| EXO1      | 1q43         | 0.115146 | 0.02441  | 0.055564357 |
| YWHAE     | 17p13.3      | 0.115136 | 0.024422 | 0.055584939 |
| NOTCH4    | 6p21.32      | -0.11513 | 0.024426 | 0.055587793 |
| NPM3      | 10q24.32     | -0.11509 | 0.024478 | 0.055699581 |
| B3GALT2   | 1q31.2       | 0.115078 | 0.024494 | 0.055731234 |
| DCAF8L2   | Xp21.3       | -0.115   | 0.024592 | 0.055947941 |
| HPRT1     | Xq26.2-q26.3 | -0.115   | 0.024597 | 0.055953029 |
| CEBPE     | 14q11.2      | 0.114984 | 0.024612 | 0.055974755 |
| GLI3      | 7p14.1       | -0.11498 | 0.024612 | 0.055974755 |
| SLC38A8   | 16q23.3      | -0.11497 | 0.024627 | 0.05600136  |
| SYT2      | 1q32.1       | 0.114966 | 0.024635 | 0.056012453 |
| RPL36     | 19p13.3      | -0.11496 | 0.024641 | 0.056020899 |
| TK1       | 17q25.3      | 0.114944 | 0.024663 | 0.056059891 |
| MAN1A1    | 6q22.31      | 0.114943 | 0.024664 | 0.056059891 |
| RGS17     | 6q25.2       | -0.11493 | 0.024674 | 0.05607293  |
| ABHD12B   | 14q22.1      | -0.11493 | 0.024675 | 0.05607293  |

|          |                 |          |          |             |
|----------|-----------------|----------|----------|-------------|
| ADRA1A   | 8p21.2          | 0.114924 | 0.024688 | 0.056096161 |
| ARMH1    | 1p34.1          | 0.114915 | 0.0247   | 0.056115539 |
| DISC1    | 1q42.2          | 0.114907 | 0.024709 | 0.056130961 |
| CENPQ    | 6p12.3          | -0.11489 | 0.02473  | 0.05617269  |
| SLC25A25 | 9q34.11         | 0.114867 | 0.024759 | 0.056232346 |
| ICAM2    | 17q23.3         | -0.11485 | 0.024786 | 0.056285259 |
| CHAF1B   | 21q22.12-q22.13 | 0.114837 | 0.024797 | 0.056305448 |
| ADGRB1   | 8q24.3          | -0.11483 | 0.024801 | 0.056306904 |
| CELSR3   | 3p21.31         | -0.11483 | 0.024811 | 0.056322968 |
| SORBS3   | 8p21.3          | -0.11479 | 0.024851 | 0.056408133 |
| BCL2L12  | 19q13.33        | -0.11479 | 0.024862 | 0.056427121 |
| IL33     | 9p24.1          | 0.11478  | 0.024869 | 0.056437445 |
| MNAT1    | 14q23.1         | -0.11473 | 0.024939 | 0.056589737 |
| DEFB109A | 8p23.1          | -0.11472 | 0.02495  | 0.056601875 |
| IL18RAP  | 2q12.1          | 0.114716 | 0.02495  | 0.056601875 |
| RABL6    | 9q34.3          | -0.1147  | 0.024965 | 0.056625133 |
| UPK3BL1  | 7q22.1          | -0.1147  | 0.024966 | 0.056625133 |
| PYGM     | 11q13.1         | -0.1147  | 0.024976 | 0.056640892 |
| TMEM109  | 11q12.2         | -0.11468 | 0.024991 | 0.056668025 |
| MS4A12   | 11q12.2         | 0.114642 | 0.025045 | 0.056783293 |
| ANKRD31  | 5q13.3          | -0.11461 | 0.025087 | 0.056873759 |
| ETF1     | 5q31.2          | 0.114602 | 0.025096 | 0.056882585 |
| ORM1     | 9q32            | -0.1146  | 0.025097 | 0.056882585 |
| HEATR1   | 1q43            | -0.1146  | 0.025104 | 0.056886178 |
| IL20RB   | 3q22.3          | -0.1146  | 0.025104 | 0.056886178 |
| AMPD3    | 11p15.4         | 0.114593 | 0.025107 | 0.056886928 |
| NUDT10   | Xp11.22         | -0.11454 | 0.025177 | 0.057039472 |
| MYH11    | 16p13.11        | -0.11453 | 0.025185 | 0.057050045 |
| MSRB2    | 10p12.2         | -0.1145  | 0.025229 | 0.057142389 |
| HLA-DMB  | 6p21.32         | 0.114494 | 0.025235 | 0.057150319 |
| OR5B21   | 11q12.1         | 0.11448  | 0.025253 | 0.057184662 |
| TPPP     | 5p15.33         | 0.114462 | 0.025275 | 0.057228809 |
| BAIAP3   | 16p13.3         | 0.11443  | 0.025317 | 0.057313271 |
| OR2L1P   | 1q44            | 0.114429 | 0.025318 | 0.057313271 |
| RGS14    | 5q35.3          | 0.114422 | 0.025327 | 0.057326632 |
| USP50    | 15q21.2         | -0.1144  | 0.025356 | 0.057386143 |
| SCARA5   | 8p21.1          | 0.114365 | 0.025401 | 0.057479847 |
| ZCCHC12  | Xq24            | -0.11432 | 0.025455 | 0.057596001 |
| RPAP3    | 12q13.11        | -0.11431 | 0.025476 | 0.057636472 |
| FAM91A1  | 8q24.13         | -0.11429 | 0.025492 | 0.057667788 |
| RBFOX1   | 16p13.3         | 0.114286 | 0.025503 | 0.05768377  |
| CD248    | 11q13.2         | -0.11428 | 0.025505 | 0.05768377  |
| FLJ44635 | Xq13.1          | -0.11427 | 0.025522 | 0.057715738 |
| FBXL7    | 5p15.1          | -0.11425 | 0.025556 | 0.057779939 |
| UBA6-AS1 | 4q13.2          | -0.11424 | 0.025557 | 0.057779939 |
| CUTA     | 6p21.32         | -0.11424 | 0.02556  | 0.057779939 |
| LCP1     | 13q14.13        | 0.11424  | 0.025562 | 0.057779939 |
| SRMS     | 20q13.33        | 0.114215 | 0.025595 | 0.057848729 |
| DR1      | 1p22.1          | 0.114206 | 0.025606 | 0.057866742 |
| CCL24    | 7q11.23         | -0.11418 | 0.025643 | 0.057944029 |
| PLOD2    | 3q24            | -0.11416 | 0.025668 | 0.057991925 |
| CCDC87   | 11q13.2         | 0.114155 | 0.025673 | 0.057991925 |
| ASAH2B   | 10q11.23        | 0.114155 | 0.025673 | 0.057991925 |
| RGS10    | 10q26.11        | 0.114134 | 0.0257   | 0.058046811 |
| PF4      | 4q13.3          | 0.114124 | 0.025713 | 0.058069257 |
| ZNF750   | 17q25.3         | -0.11412 | 0.025721 | 0.058080028 |
| PRKDC    | 8q11.21         | -0.1141  | 0.025748 | 0.058135014 |
| POM121C  | 7q11.23         | -0.11409 | 0.025759 | 0.058153203 |

|            |                |          |          |             |
|------------|----------------|----------|----------|-------------|
| LAMC2      | 1q25.3         | 0.114086 | 0.025762 | 0.058154286 |
| CRHR1      | 17q21.31       | -0.11408 | 0.025774 | 0.058174315 |
| MPDZ       | 9p23           | -0.11404 | 0.025827 | 0.058287354 |
| WSCD2      | 12q23.3        | -0.11403 | 0.02584  | 0.05831027  |
| USP32      | 17q23.1-q23.2  | 0.114003 | 0.025872 | 0.05837416  |
| PAGR1      | 16p11.2        | -0.114   | 0.025876 | 0.058377139 |
| SPAG8      | 9p13.3         | -0.11395 | 0.025942 | 0.058519724 |
| SLC7A2     | 8p22           | 0.113941 | 0.025954 | 0.058539363 |
| PDCL       | 9q33.2         | 0.113935 | 0.025961 | 0.058548848 |
| ASIC4      | 2q35           | -0.11393 | 0.025964 | 0.058548848 |
| THAP10     | 15q23          | -0.11393 | 0.02597  | 0.058556624 |
| TELO2      | 16p13.3        | -0.1139  | 0.026006 | 0.058630977 |
| CARD11     | 7p22.2         | -0.1139  | 0.026009 | 0.058630977 |
| BDNF       | 11p14.1        | -0.1139  | 0.026012 | 0.058631393 |
| ZNF30      | 19q13.11       | -0.11388 | 0.02603  | 0.058666379 |
| TMEM128    | 4p16.3         | -0.11388 | 0.026036 | 0.05867321  |
| PRRX2      | 9q34.11        | -0.11384 | 0.026088 | 0.058782484 |
| OR1D4      | 17p13.3        | 0.113814 | 0.02612  | 0.058849121 |
| BEND2      | Xp22.13        | 0.113805 | 0.026133 | 0.058871093 |
| DDX46      | 5q31.1         | 0.113795 | 0.026145 | 0.058892159 |
| GGT5       | 22q11.23       | -0.11378 | 0.026164 | 0.058921067 |
| DKK3       | 11p15.3        | -0.11378 | 0.026166 | 0.058921067 |
| JAG2       | 14q32.33       | -0.11378 | 0.026167 | 0.058921067 |
| PRPF39     | 14q21.2        | -0.11376 | 0.026192 | 0.058970954 |
| TMEM89     | 3p21.31        | -0.11375 | 0.026205 | 0.058992975 |
| ECSCR      | 5q31.2         | -0.11374 | 0.026213 | 0.059005547 |
| ZSCAN16    | 6p22.1         | -0.11374 | 0.026221 | 0.059017253 |
| CEP290     | 12q21.32       | -0.11373 | 0.026237 | 0.059043666 |
| TSLP       | 5q22.1         | 0.113724 | 0.026239 | 0.059043666 |
| POR        | 7q11.23        | -0.11372 | 0.026248 | 0.059056508 |
| PFKM       | 12q13.11       | -0.11369 | 0.02628  | 0.05912194  |
| FBXW11     | 5q35.1         | 0.113673 | 0.026308 | 0.059170275 |
| ELP5       | 17p13.1        | 0.113672 | 0.026309 | 0.059170275 |
| INHBA      | 7p14.1         | -0.11367 | 0.02631  | 0.059170275 |
| RAB31      | 18p11.22       | -0.11362 | 0.026377 | 0.059308493 |
| COL4A6     | Xq22.3         | 0.11362  | 0.026377 | 0.059308493 |
| TBCCD1     | 3q27.3         | 0.113598 | 0.026407 | 0.059368361 |
| GPR183     | 13q32.3        | 0.11358  | 0.026432 | 0.059417272 |
| ALDH1B1    | 9p13.1         | -0.11351 | 0.026529 | 0.05961735  |
| SUB1       | 5p13.3         | -0.11351 | 0.026529 | 0.05961735  |
| GFPT2      | 5q35.3         | -0.11351 | 0.02653  | 0.05961735  |
| MMP7       | 11q22.2        | -0.1135  | 0.026535 | 0.059623627 |
| FAM13A     | 4q22.1         | 0.113498 | 0.026541 | 0.059626458 |
| ABHD6      | 3p14.3         | 0.113497 | 0.026543 | 0.059626458 |
| MCAM       | 11q23.3        | -0.11349 | 0.026553 | 0.059642465 |
| TPST1      | 7q11.21        | -0.11348 | 0.02657  | 0.059673378 |
| ZNF490     | 19p13.2-p13.13 | -0.11347 | 0.026579 | 0.059687125 |
| ALYREF     | 17q25.3        | -0.11347 | 0.026584 | 0.059690734 |
| BANF2      | 20p12.1        | -0.11346 | 0.026586 | 0.059690734 |
| CIAPIN1    | 16q21          | -0.11346 | 0.026592 | 0.05969625  |
| ZBTB11-AS1 | 3q12.3         | -0.11345 | 0.026606 | 0.059721705 |
| SKA3       | 13q12.11       | -0.11343 | 0.026631 | 0.05977021  |
| C20ORF85   | 20q13.32       | -0.11342 | 0.026646 | 0.059795778 |
| ABCC6P1    | 16p12.3        | -0.11342 | 0.026648 | 0.059795778 |
| MAP4       | 3p21.31        | -0.1134  | 0.026675 | 0.059848903 |
| SYT11      | 1q22           | -0.11338 | 0.026693 | 0.059879073 |
| RIN3       | 14q32.12       | 0.113384 | 0.026694 | 0.059879073 |
| GNG12      | 1p31.3         | 0.113381 | 0.026698 | 0.059882126 |

|           |              |          |          |             |
|-----------|--------------|----------|----------|-------------|
| OR1C1     | 1q44         | 0.113367 | 0.026718 | 0.059919301 |
| SPC24     | 19p13.2      | 0.113341 | 0.026752 | 0.059990118 |
| PLPPR4    | 1p21.3-p21.2 | -0.11333 | 0.02677  | 0.060023501 |
| GPR156    | 3q13.33      | -0.11332 | 0.026774 | 0.060025468 |
| RNF39     | 6p22.1       | 0.113321 | 0.026779 | 0.060028769 |
| PDE10A    | 6q27         | 0.113319 | 0.026782 | 0.060028769 |
| APOL3     | 22q12.3      | 0.113305 | 0.026801 | 0.060066193 |
| FAR1      | 11p15.3      | 0.113302 | 0.026804 | 0.060066193 |
| ARSA      | 22q13.33     | 0.113295 | 0.026814 | 0.060076886 |
| KREMEN1   | 22q12.1      | -0.11329 | 0.026815 | 0.060076886 |
| S100A13   | 1q21.3       | 0.113289 | 0.026823 | 0.06008778  |
| EIF3C     | 16p11.2      | -0.11326 | 0.026867 | 0.060177743 |
| CHRNA3    | 8p11.21      | -0.11325 | 0.026869 | 0.060177743 |
| ANXA1     | 9q21.13      | 0.11325  | 0.026876 | 0.060186427 |
| ARGLU1    | 13q33.3      | -0.11322 | 0.026912 | 0.060260748 |
| CDO1      | 5q22.3       | -0.11319 | 0.026952 | 0.060343567 |
| PLA2G2D   | 1p36.12      | 0.113185 | 0.026964 | 0.060356358 |
| ADORA2B   | 17p12        | 0.113185 | 0.026964 | 0.060356358 |
| PEX2      | 8q21.13      | -0.11318 | 0.02697  | 0.06036271  |
| AFDN      | 6q27         | -0.11317 | 0.026987 | 0.060393956 |
| MIXL1     | 1q42.12      | 0.113162 | 0.026995 | 0.060404414 |
| TLR9      | 3p21.2       | -0.11314 | 0.02703  | 0.060476474 |
| LRRN3     | 7q31.1       | -0.11311 | 0.027064 | 0.06054744  |
| TGDS      | 13q32.1      | -0.11311 | 0.02707  | 0.060553213 |
| HCP5      | 6p21.33      | 0.113097 | 0.027084 | 0.060572374 |
| ANKFN1    | 17q22        | 0.113096 | 0.027085 | 0.060572374 |
| ABCC6     | 16p13.11     | -0.11309 | 0.027097 | 0.060593347 |
| EYA2      | 20q13.12     | -0.11308 | 0.027107 | 0.060609559 |
| S100A7A   | 1q21.3       | -0.11305 | 0.027147 | 0.060690516 |
| FURIN     | 15q26.1      | 0.113026 | 0.02718  | 0.060759167 |
| SLAMF1    | 1q23.3       | 0.113023 | 0.027184 | 0.060760946 |
| SCARNA2   | 1p13.3       | -0.11302 | 0.027189 | 0.060764608 |
| DYNC2H1   | 11q22.3      | -0.11301 | 0.027201 | 0.060785581 |
| YWHAEP7   | 17q12        | 0.113008 | 0.027206 | 0.060788528 |
| FASTKD3   | 5p15.31      | -0.113   | 0.02721  | 0.060792438 |
| CEP19     | 3q29         | -0.11298 | 0.027248 | 0.060870678 |
| ERVFRD-1  | 6p24.2       | 0.112973 | 0.027253 | 0.060873394 |
| CRABP1    | 15q25.1      | -0.11297 | 0.027257 | 0.060873394 |
| LRPAP1    | 4p16.3       | 0.112969 | 0.027259 | 0.060873394 |
| SLC13A1   | 7q31.32      | 0.112956 | 0.027276 | 0.060904613 |
| CDH7      | 18q22.1      | 0.112945 | 0.027291 | 0.060932575 |
| PIWIL2    | 8p21.3       | -0.11293 | 0.027307 | 0.060954442 |
| RAD9A     | 11q13.2      | -0.11293 | 0.027307 | 0.060954442 |
| BTK       | Xq22.1       | 0.112908 | 0.027342 | 0.061024924 |
| WT1-AS    | 11p13        | -0.11286 | 0.027404 | 0.061157042 |
| ZNF479    | 7p11.2       | -0.11282 | 0.027459 | 0.061271917 |
| CENPBD1P1 | 19q13.43     | 0.112821 | 0.027462 | 0.061271917 |
| RPPH1     | 14q11.2      | -0.1128  | 0.027498 | 0.061346008 |
| LRRC4C    | 11p12        | -0.11277 | 0.027528 | 0.061405179 |
| C9ORF163  | 9q34.3       | -0.11277 | 0.027533 | 0.061410011 |
| PNPLA5    | 22q13.31     | -0.11276 | 0.02754  | 0.061419127 |
| POLK      | 5q13.3       | 0.112756 | 0.027552 | 0.06143956  |
| INTS6     | 13q14.3      | -0.11275 | 0.027558 | 0.061446011 |
| ZXDA      | Xp11.21      | -0.11274 | 0.027575 | 0.061476378 |
| PGC       | 6p21.1       | -0.11273 | 0.027591 | 0.061506275 |
| LRRC37A   | 17q21.31     | -0.1127  | 0.027625 | 0.061575148 |
| PRADC1    | 2p13.2       | 0.112691 | 0.027642 | 0.061604922 |
| HOXA5     | 7p15.2       | -0.11266 | 0.027679 | 0.061681367 |



|          |              |          |          |             |
|----------|--------------|----------|----------|-------------|
| PRR23A   | 3q23         | 0.112659 | 0.027686 | 0.061690073 |
| KDM4E    | 11q21        | -0.11265 | 0.027705 | 0.061724117 |
| FBLN5    | 14q32.12     | -0.11264 | 0.027708 | 0.061724135 |
| UBE2L6   | 11q12.1      | 0.112641 | 0.027711 | 0.061725943 |
| HELZ2    | 20q13.33     | -0.11263 | 0.027722 | 0.06174243  |
| GPR101   | Xq26.3       | -0.11262 | 0.027735 | 0.061763584 |
| NCAN     | 19p13.11     | 0.112605 | 0.027762 | 0.061818291 |
| KCNH5    | 14q23.2      | -0.11257 | 0.027813 | 0.061924101 |
| FLJ42627 | 16p13.3      | 0.112555 | 0.027832 | 0.061958847 |
| CYBB     | Xp21.1-p11.4 | 0.112552 | 0.027836 | 0.061961329 |
| TTY6     | Yq11.223     | 0.112549 | 0.02784  | 0.061964069 |
| TAS2R1   | 5p15.31      | -0.11254 | 0.027848 | 0.061974301 |
| PNPLA6   | 19p13.2      | -0.11252 | 0.027877 | 0.062031725 |
| XPR1     | 1q25.3       | 0.112481 | 0.027935 | 0.062154897 |
| PYGO1    | 15q21.3      | -0.11246 | 0.027962 | 0.062206744 |
| OSBP2    | 22q12.2      | -0.11246 | 0.027971 | 0.062221957 |
| ITGB3BP  | 1p31.3       | -0.11244 | 0.027992 | 0.062261082 |
| CANX     | 5q35.3       | 0.112397 | 0.028054 | 0.062390695 |
| SERPINF1 | 17p13.3      | -0.11239 | 0.028069 | 0.06241743  |
| CRNN     | 1q21.3       | -0.11237 | 0.028086 | 0.062443824 |
| NEXMIF   | Xq13.3       | -0.11237 | 0.028087 | 0.062443824 |
| SLC11A2  | 12q13.12     | -0.11236 | 0.028104 | 0.062467843 |
| GRN      | 17q21.31     | 0.112361 | 0.028104 | 0.062467843 |
| SNRPA1   | 15q26.3      | -0.11236 | 0.028111 | 0.062477757 |
| SIRT6    | 19p13.3      | 0.112331 | 0.028146 | 0.062547008 |
| IGLL1    | 22q11.23     | -0.11233 | 0.028154 | 0.062559287 |
| HAGHL    | 16p13.3      | 0.112316 | 0.028168 | 0.062581704 |
| FHDC1    | 4q31.3       | -0.1123  | 0.028194 | 0.062632815 |
| TMEM63C  | 14q24.3      | -0.11228 | 0.028222 | 0.062688017 |
| EN2      | 7q36.3       | -0.11223 | 0.028285 | 0.062821096 |
| MUC15    | 11p14.2      | -0.11221 | 0.028312 | 0.062875698 |
| TBC1D13  | 9q34.11      | -0.11219 | 0.028347 | 0.062944682 |
| DLGAP2   | 8p23.3       | -0.11216 | 0.02839  | 0.063034191 |
| TAAR8    | 6q23.2       | 0.112139 | 0.028418 | 0.06309019  |
| CR1      | 1q32.2       | 0.112103 | 0.028469 | 0.063194669 |
| CREG1    | 1q24.2       | -0.1121  | 0.028479 | 0.063211558 |
| WFIKKN1  | 16p13.3      | 0.112057 | 0.028535 | 0.063327146 |
| AGO2     | 8q24.3       | -0.11205 | 0.028544 | 0.06334126  |
| PABPC5   | Xq21.31      | -0.11202 | 0.028582 | 0.063418814 |
| FAM151A  | -            | 0.112012 | 0.028599 | 0.063449131 |
| CHEK1    | 11q24.2      | -0.11193 | 0.028714 | 0.063694431 |
| TBC1D20  | 20p13        | -0.11193 | 0.028716 | 0.063694431 |
| PARK7    | 1p36.23      | -0.11192 | 0.028731 | 0.063713939 |
| FGF23    | 12p13.32     | -0.11192 | 0.028731 | 0.063713939 |
| TWF2     | 3p21.2       | -0.1119  | 0.028755 | 0.063760288 |
| VAMP5    | 2p11.2       | -0.1119  | 0.02876  | 0.063764198 |
| NSMCE4A  | 10q26.13     | -0.1119  | 0.028764 | 0.063764661 |
| TXLNG    | Xp22.2       | -0.11189 | 0.028776 | 0.06378416  |
| AGPAT5   | 8p23.1       | 0.111886 | 0.028779 | 0.06378416  |
| KNG1     | 3q27.3       | -0.11187 | 0.028801 | 0.063821755 |
| OPRPN    | 4q13.3       | 0.111869 | 0.028804 | 0.063821755 |
| NCR2     | 6p21.1       | 0.111866 | 0.028808 | 0.063821755 |
| EGOT     | 3p26.1       | -0.11187 | 0.028809 | 0.063821755 |
| MEGF8    | 19q13.2      | -0.11185 | 0.02883  | 0.063856652 |
| DERL2    | 17p13.2      | 0.111849 | 0.028832 | 0.063856652 |
| MST1     | 3p21.31      | -0.11185 | 0.028836 | 0.063856652 |
| ZNF117   | 7q11.21      | -0.11185 | 0.028837 | 0.063856652 |
| NNMT     | 11q23.2      | -0.11184 | 0.028848 | 0.063874301 |

|           |          |          |          |             |
|-----------|----------|----------|----------|-------------|
| RAD1      | 5p13.2   | -0.11183 | 0.028859 | 0.063891954 |
| LAMA4     | 6q21     | -0.11181 | 0.028885 | 0.063934829 |
| PSKH1     | 16q22.1  | -0.11181 | 0.028885 | 0.063934829 |
| RHCE      | 1p36.11  | 0.111799 | 0.028905 | 0.063971345 |
| FAM193A   | 4p16.3   | 0.111765 | 0.028954 | 0.06407402  |
| MKLN1     | 7q32.3   | -0.11175 | 0.02897  | 0.064101357 |
| SYNPO2L   | 10q22.2  | -0.1117  | 0.029042 | 0.064252953 |
| ZSCAN4    | 19q13.43 | 0.111699 | 0.02905  | 0.064263571 |
| SP2       | 17q21.32 | 0.111683 | 0.029072 | 0.064305516 |
| GPC4      | Xq26.2   | -0.11166 | 0.029101 | 0.064361055 |
| LIAS      | 4p14     | 0.111662 | 0.029103 | 0.064361055 |
| RAG1      | 11p12    | -0.11164 | 0.029139 | 0.064432735 |
| CCDC88B   | 11q13.1  | -0.11163 | 0.029149 | 0.064447749 |
| TMEM143   | 19q13.33 | 0.111615 | 0.029171 | 0.064485399 |
| ZNF248    | 10p11.21 | -0.11161 | 0.029173 | 0.064485399 |
| DPY19L2P4 | 7q21.13  | -0.11161 | 0.029177 | 0.064488042 |
| FBLN2     | 3p25.1   | -0.1116  | 0.029187 | 0.064502995 |
| SIX1      | 14q23.1  | -0.11159 | 0.029202 | 0.064529003 |
| WNK2      | 9q22.31  | -0.11159 | 0.029212 | 0.064544827 |
| EVA1C     | 21q22.11 | 0.111571 | 0.029235 | 0.064588265 |
| POM121    | 7q11.23  | -0.11156 | 0.029254 | 0.064622024 |
| GATA2     | 3q21.3   | 0.111553 | 0.029261 | 0.064630818 |
| DMRTC1    | Xq13.1   | -0.11151 | 0.029328 | 0.064772483 |
| MPND      | 19p13.3  | 0.111496 | 0.029345 | 0.06480185  |
| NOL9      | 1p36.31  | 0.111484 | 0.029363 | 0.064834292 |
| DDX53     | Xp22.11  | -0.11147 | 0.029379 | 0.064862968 |
| PPID      | 4q32.1   | -0.11147 | 0.029387 | 0.064873175 |
| TTC8      | 14q31.3  | -0.11145 | 0.02941  | 0.064917164 |
| GNAI2     | 3p21.31  | -0.11144 | 0.029422 | 0.06493645  |
| CNIH4     | 1q42.11  | -0.11143 | 0.029441 | 0.064971056 |
| FYCO1     | 3p21.31  | 0.111423 | 0.029452 | 0.06498757  |
| TALDO1    | 11p15.5  | -0.11139 | 0.029505 | 0.065098871 |
| HSPB1     | 7q11.23  | -0.11138 | 0.029512 | 0.065105647 |
| LINC00598 | 13q14.11 | 0.111375 | 0.029522 | 0.065120401 |
| ZBTB43    | 9q33.3   | 0.111371 | 0.029527 | 0.065120401 |
| IGFBP5    | 2q35     | -0.11137 | 0.029528 | 0.065120401 |
| TOX3      | 16q12.1  | -0.11136 | 0.029545 | 0.065150903 |
| GIN1      | 5q21.1   | 0.111353 | 0.029554 | 0.065163268 |
| DNAJC8    | 1p35.3   | -0.11134 | 0.029569 | 0.065189598 |
| ORC1      | 1p32.3   | 0.111315 | 0.029611 | 0.065273921 |
| PRR16     | 5q23.1   | -0.11131 | 0.02962  | 0.065287705 |
| FRG2C     | 3p12.3   | -0.1113  | 0.029626 | 0.065293346 |
| CCDC150   | 2q33.1   | -0.11126 | 0.029692 | 0.065431441 |
| NAXD      | 13q34    | -0.11126 | 0.029699 | 0.065438948 |
| COL28A1   | 7p21.3   | 0.111246 | 0.029713 | 0.065462567 |
| SPATS2L   | 2q33.1   | -0.11124 | 0.029719 | 0.065469377 |
| FLJ30679  | 16q24.1  | -0.11123 | 0.029735 | 0.065497636 |
| ARHGAP6   | Xp22.2   | -0.11123 | 0.029741 | 0.065500165 |
| PRSS42P   | 3p21.31  | -0.11122 | 0.029745 | 0.065500165 |
| SP7       | 12q13.13 | -0.11122 | 0.029747 | 0.065500165 |
| WFDC6     | 20q13.12 | 0.111221 | 0.029749 | 0.065500165 |
| CLUAP1    | 16p13.3  | -0.11122 | 0.029756 | 0.065508158 |
| DICER1    | 14q32.13 | 0.111209 | 0.029766 | 0.065523388 |
| FAM126A   | 7p15.3   | -0.1112  | 0.029778 | 0.065542126 |
| CHRNE     | 17p13.2  | -0.11119 | 0.029792 | 0.065565779 |
| NR1H2     | 19q13.33 | 0.111183 | 0.029805 | 0.065585931 |
| PCA3      | 9q21.2   | 0.111176 | 0.029815 | 0.065594672 |
| ATP5F1D   | 19p13.3  | 0.111176 | 0.029815 | 0.065594672 |

|            |                |          |          |             |
|------------|----------------|----------|----------|-------------|
| CCN5       | 20q13.12       | -0.11115 | 0.029855 | 0.065676017 |
| ADAMTS9    | 3p14.1         | 0.11113  | 0.029883 | 0.065729823 |
| ITGA6      | 2q31.1         | 0.11111  | 0.029913 | 0.065788694 |
| CEACAM5    | 19q13.2        | 0.111094 | 0.029938 | 0.065834939 |
| TBXT       | 6q27           | -0.11108 | 0.029956 | 0.065867545 |
| SPNS1      | 16p11.2        | -0.11106 | 0.02999  | 0.065936671 |
| CHTF8      | 16q22.1        | 0.111048 | 0.030006 | 0.065963071 |
| SELE       | 1q24.2         | -0.11105 | 0.030009 | 0.065963071 |
| CDHR5      | 11p15.5        | 0.111029 | 0.030034 | 0.066010123 |
| FAT3       | 11q14.3        | -0.11102 | 0.030044 | 0.066025904 |
| BFSP2      | 3q22.1         | 0.111019 | 0.030049 | 0.066028473 |
| XPA        | 9q22.33        | -0.11102 | 0.030053 | 0.066030695 |
| KIF20A     | 5q31.2         | 0.111005 | 0.03007  | 0.066060162 |
| USP27X-AS1 | Xp11.23        | -0.111   | 0.030082 | 0.066079363 |
| DIAPH2     | Xq21.33        | -0.11099 | 0.030099 | 0.066109907 |
| SNORA3B    | 11p15.4        | -0.11093 | 0.030175 | 0.066259325 |
| UPP1       | 7p12.3         | 0.110934 | 0.030175 | 0.066259325 |
| PSG9       | 19q13.31       | -0.11093 | 0.030177 | 0.066259325 |
| COL4A2     | 13q34          | -0.11091 | 0.030208 | 0.066320578 |
| JUP        | 17q21.2        | -0.1109  | 0.030219 | 0.066338092 |
| TBX5       | 12q24.21       | -0.1109  | 0.03023  | 0.066354964 |
| CCDC57     | 17q25.3        | -0.1109  | 0.030234 | 0.066356129 |
| ZNF559     | 19p13.2        | -0.11088 | 0.03025  | 0.066382863 |
| ZNF418     | 19q13.43       | -0.11088 | 0.030264 | 0.066406928 |
| ATP5PF     | 21q21.3        | 0.110867 | 0.030276 | 0.06642714  |
| MAP1S      | 19p13.11       | 0.11086  | 0.030286 | 0.066441133 |
| LCMT2      | 15q15.3        | -0.11085 | 0.030299 | 0.066462221 |
| ELOVL4     | 6q14.1         | -0.11084 | 0.030324 | 0.066510279 |
| CUBN       | 10p13          | -0.11083 | 0.030335 | 0.066527442 |
| NFYC-AS1   | 1p34.2         | -0.11082 | 0.030346 | 0.066536692 |
| MEDAG      | 13q12.3        | -0.11082 | 0.030346 | 0.066536692 |
| TEKT4P2    | 21p11.2        | -0.11081 | 0.030367 | 0.066571114 |
| APH1A      | 1q21.2         | 0.110806 | 0.030369 | 0.066571114 |
| YWHAH      | 22q12.3        | 0.110796 | 0.030383 | 0.066594369 |
| C1ORF74    | 1q32.2         | -0.11079 | 0.030395 | 0.066614078 |
| UGT3A2     | 5p13.2         | 0.110745 | 0.03046  | 0.066749152 |
| KIF1BP     | 10q22.1        | 0.110729 | 0.030484 | 0.066794396 |
| INSL3      | 19p13.11       | 0.11072  | 0.030497 | 0.066816213 |
| HBB        | 11p15.4        | 0.110713 | 0.030508 | 0.066832827 |
| RAI14      | 5p13.2         | -0.11065 | 0.0306   | 0.067026345 |
| LURAP1     | 1p34.1         | -0.11064 | 0.030619 | 0.067060809 |
| RAB43      | 3q21.3         | 0.110621 | 0.030647 | 0.067116016 |
| CEP57L1    | 6q21           | 0.110617 | 0.030654 | 0.067123654 |
| NDUFA13    | 19p13.11       | -0.11061 | 0.030666 | 0.067141386 |
| BRINP2     | 1q25.2         | -0.11059 | 0.030688 | 0.067175351 |
| MINDY3     | 10p13          | 0.110594 | 0.030688 | 0.067175351 |
| CA10       | 17q21.33-q22   | 0.11059  | 0.030695 | 0.067183942 |
| PTPN3      | 9q31.3         | 0.110568 | 0.030728 | 0.067243121 |
| VEPH1      | 3q25.31-q25.32 | 0.110567 | 0.030729 | 0.067243121 |
| HOMEZ      | 14q11.2        | 0.110527 | 0.030791 | 0.067371619 |
| DCTN4      | 5q33.1         | 0.11052  | 0.030801 | 0.067385779 |
| DLG5       | 10q22.3        | 0.11051  | 0.030817 | 0.067413576 |
| LRP2BP     | 4q35.1         | -0.11049 | 0.030842 | 0.067461087 |
| RBP7       | 1p36.22        | -0.11049 | 0.030851 | 0.067473467 |
| ZNF780A    | 19q13.2        | -0.11048 | 0.030863 | 0.067491995 |
| GALNTL5    | 7q36.1         | -0.11046 | 0.030891 | 0.067546353 |
| MRO        | 18q21.2        | 0.110449 | 0.030909 | 0.067577892 |
| HTATIP2    | 11p15.1        | -0.11044 | 0.030917 | 0.067589188 |

|           |                |          |          |             |
|-----------|----------------|----------|----------|-------------|
| SLIRP     | 14q24.3        | -0.11044 | 0.030925 | 0.067599071 |
| CLCN2     | 3q27.1         | -0.11043 | 0.030931 | 0.06760464  |
| TIGD2     | 4q22.1         | 0.110427 | 0.030943 | 0.067621721 |
| EPB41L3   | 18p11.31       | 0.110406 | 0.030974 | 0.067684152 |
| FAM50B    | 6p25.2         | -0.11039 | 0.031002 | 0.067736544 |
| ARHGAP18  | 6q22.33        | -0.11038 | 0.031016 | 0.067760138 |
| MEIG1     | 10p13          | -0.11038 | 0.03102  | 0.067762148 |
| ANAPC2    | 9q34.3         | 0.110361 | 0.031043 | 0.067805183 |
| RNF167    | 17p13.2        | 0.110358 | 0.031048 | 0.067807883 |
| PIGO      | 9p13.3         | 0.110355 | 0.031053 | 0.067811305 |
| IBSP      | 4q22.1         | -0.11035 | 0.031063 | 0.067825805 |
| KANK2     | 19p13.2        | -0.11033 | 0.031092 | 0.067881636 |
| SAMD4A    | 14q22.2        | -0.11032 | 0.031108 | 0.067909604 |
| MARF1     | 16p13.11       | 0.110316 | 0.031113 | 0.06791231  |
| RHBDD3    | 22q12.2        | -0.11031 | 0.031129 | 0.067940289 |
| RAB29     | 1q32.1         | -0.11029 | 0.031158 | 0.067995736 |
| HLA-DOB   | 6p21.32        | 0.110242 | 0.031227 | 0.068140222 |
| BIN2      | 12q13.13       | 0.110221 | 0.031259 | 0.068200877 |
| SIGLEC11  | 19q13.33       | 0.11018  | 0.031323 | 0.068332869 |
| IPMK      | 10q21.1        | 0.110177 | 0.031327 | 0.068335382 |
| TUBB8     | 10p15.3        | 0.110171 | 0.031337 | 0.06834931  |
| TRABD2A   | 2p11.2         | -0.11017 | 0.031342 | 0.068353883 |
| TMSB4XP8  | 4q22.1         | -0.11015 | 0.031371 | 0.068401726 |
| LINC02610 | 2q37.3         | -0.11015 | 0.031371 | 0.068401726 |
| HERC2P2   | 15q11.2        | -0.11013 | 0.031406 | 0.068469551 |
| IL32      | 16p13.3        | -0.11012 | 0.031422 | 0.06849772  |
| PDZRN3    | 3p13           | -0.1101  | 0.031439 | 0.068528081 |
| SCAMP4    | 19p13.3        | -0.11009 | 0.031468 | 0.068583926 |
| TMIGD2    | 19p13.3        | 0.110039 | 0.031542 | 0.068736042 |
| WNT2      | 7q31.2         | -0.11004 | 0.031547 | 0.068740204 |
| CCR7      | 17q21.2        | 0.110032 | 0.031552 | 0.068740907 |
| TLR1      | 4p14           | 0.110031 | 0.031554 | 0.068740907 |
| FLT4      | 5q35.3         | -0.11002 | 0.031566 | 0.068758611 |
| SLC26A11  | 17q25.3        | -0.10999 | 0.03162  | 0.068870105 |
| MBD3      | 19p13.3        | -0.10998 | 0.031635 | 0.068894027 |
| ABCC12    | 16q12.1        | -0.10994 | 0.031688 | 0.069002281 |
| TRPV4     | 12q24.11       | -0.10992 | 0.031723 | 0.069069006 |
| CHERP     | 19p13.11       | -0.10992 | 0.031725 | 0.069069006 |
| CCDC66    | 3p14.3         | -0.1099  | 0.031751 | 0.06911789  |
| FAM78B    | 1q24.1         | 0.1099   | 0.031758 | 0.069124844 |
| ATXN1     | 6p22.3         | -0.1099  | 0.031761 | 0.069124844 |
| LINC00029 | 20q13.33       | -0.10989 | 0.031772 | 0.06914017  |
| ZNF525    | 19q13.42       | -0.10989 | 0.03178  | 0.069150121 |
| RIMS2     | 8q22.3         | -0.10987 | 0.031806 | 0.069198125 |
| TM9SF1    | 14q12          | 0.109858 | 0.031824 | 0.069230405 |
| METTL24   | 6q21           | -0.10985 | 0.031836 | 0.069249273 |
| PSMG3-AS1 | 7p22.3         | -0.10984 | 0.031855 | 0.069282869 |
| CNGB1     | 16q21          | -0.10982 | 0.031876 | 0.069320509 |
| LYSMD4    | 15q26.3        | 0.109802 | 0.031912 | 0.069391204 |
| AUH       | 9q22.31        | 0.109796 | 0.031921 | 0.069403515 |
| FKBP14    | 7p14.3         | -0.10979 | 0.031927 | 0.069409212 |
| SNORD97   | 11p15.4        | -0.10979 | 0.031931 | 0.069410955 |
| CYP7B1    | 8q12.3         | -0.10978 | 0.031943 | 0.069430146 |
| TTC33     | 5p13.1         | 0.109778 | 0.031949 | 0.069435131 |
| NCOA7     | 6q22.31-q22.32 | 0.109717 | 0.032046 | 0.069637407 |
| KLF16     | 19p13.3        | 0.109714 | 0.032049 | 0.069637939 |
| NDST4     | 4q26           | -0.10969 | 0.032082 | 0.069699532 |
| TOM1L1    | 17q22          | 0.109692 | 0.032085 | 0.069699532 |

|           |                 |          |          |             |
|-----------|-----------------|----------|----------|-------------|
| SOX30     | 5q33.3          | 0.109675 | 0.032111 | 0.069749503 |
| PLSCR1    | 3q24            | 0.109651 | 0.03215  | 0.069825396 |
| SDHC      | 1q23.3          | 0.109638 | 0.03217  | 0.069862158 |
| PORCN     | Xp11.23         | -0.1096  | 0.032228 | 0.06998105  |
| SMAD7     | 18q21.1         | -0.10958 | 0.032254 | 0.070028987 |
| TMEM41B   | 11p15.4         | 0.109565 | 0.032285 | 0.070088808 |
| UCK1      | 9q34.13         | -0.10956 | 0.032292 | 0.070096774 |
| TTLL3     | 3p25.3          | -0.10955 | 0.032303 | 0.070112153 |
| CCN2      | 6q23.2          | -0.10954 | 0.032329 | 0.070158496 |
| BRD9      | 5p15.33         | -0.10954 | 0.032331 | 0.070158496 |
| SPTSSA    | 14q13.1         | 0.109524 | 0.03235  | 0.070192434 |
| DCLRE1B   | 1p13.2          | 0.109512 | 0.032369 | 0.070226387 |
| STK35     | 20p13           | -0.1095  | 0.032386 | 0.070255155 |
| KLF11     | 2p25.1          | 0.109393 | 0.032559 | 0.070623329 |
| MEIS2     | 15q14           | 0.109363 | 0.032607 | 0.070719403 |
| NF2       | 22q12.2         | 0.109348 | 0.032631 | 0.070762529 |
| AMHR2     | 12q13.13        | 0.10934  | 0.032644 | 0.070783264 |
| TMEM116   | 12q24.12-q24.13 | -0.10933 | 0.032668 | 0.070827911 |
| WDHD1     | 14q22.2-q22.3   | 0.109305 | 0.0327   | 0.070890542 |
| KRTAP5-10 | 11q13.4         | -0.10928 | 0.032732 | 0.070951864 |
| NUDT16P1  | 3q22.1          | 0.109278 | 0.032743 | 0.070968751 |
| CXCL3     | 4q13.3          | 0.109274 | 0.03275  | 0.070975299 |
| EIF4G1    | 3q27.1          | 0.109259 | 0.032774 | 0.071020802 |
| ZEB1      | 10p11.22        | -0.10922 | 0.032833 | 0.071139081 |
| KCTD19    | 16q22.1         | -0.10917 | 0.032916 | 0.071312348 |
| CLPSL1    | 6p21.31         | -0.10914 | 0.032966 | 0.071413235 |
| VMO1      | 17p13.2         | 0.109135 | 0.032973 | 0.071421096 |
| PPP2R2C   | 4p16.1          | -0.10912 | 0.033002 | 0.071474368 |
| INKA1     | 3p21.31         | -0.10911 | 0.033008 | 0.071480931 |
| MRPS10    | 6p21.1          | -0.10911 | 0.033013 | 0.071483017 |
| XRN1      | 3q23            | 0.109097 | 0.033035 | 0.071522759 |
| TAP2      | 6p21.32         | 0.109082 | 0.033059 | 0.071568552 |
| LNPK      | 2q31.1          | 0.109044 | 0.033121 | 0.071694386 |
| SAR1A     | 10q22.1         | 0.10904  | 0.033127 | 0.071698721 |
| BICC1     | 10q21.1         | -0.10898 | 0.033231 | 0.071916315 |
| SNX2      | 5q23.2          | 0.108971 | 0.03324  | 0.071920522 |
| CPB1      | 3q24            | 0.10897  | 0.03324  | 0.071920522 |
| MYLK3     | 16q11.2         | -0.10897 | 0.033246 | 0.071924791 |
| NPTX1     | 17q25.3         | -0.10896 | 0.033261 | 0.071949767 |
| TF        | 3q22.1          | -0.10893 | 0.033299 | 0.072023797 |
| PICSA     | 21q22.3         | -0.10893 | 0.033302 | 0.072023797 |
| RTL6      | 22q13.31        | 0.108926 | 0.033312 | 0.072038434 |
| AFAP1-AS1 | 4p16.1          | 0.108882 | 0.033383 | 0.072183833 |
| MGAT5B    | 17q25.2         | -0.10887 | 0.033401 | 0.07221355  |
| PCDH7     | 4p15.1          | -0.10887 | 0.03341  | 0.072226841 |
| SNTN      | 3p14.2          | -0.10886 | 0.033418 | 0.072235433 |
| PPP1CC    | 12q24.11        | 0.108834 | 0.033462 | 0.072323001 |
| SPATA31D1 | 9q21.32         | -0.10882 | 0.033479 | 0.072349994 |
| NEIL1     | 15q24.2         | -0.10882 | 0.033482 | 0.072349994 |
| TRIM48    | 11q11           | -0.10882 | 0.033487 | 0.072353915 |
| GPR45     | 2q12.1          | -0.10881 | 0.033503 | 0.072379312 |
| OSTC      | 4q25            | 0.108753 | 0.033595 | 0.072571108 |
| ZC3H14    | 14q31.3         | 0.108739 | 0.033619 | 0.072614403 |
| NEURL4    | 17p13.1         | 0.108733 | 0.033628 | 0.07262718  |
| TUBGCP5   | 15q11.2         | 0.108712 | 0.033662 | 0.072693416 |
| LHX3      | 9q34.3          | -0.1087  | 0.033675 | 0.072707534 |
| MORC2-AS1 | 22q12.2         | -0.1087  | 0.033676 | 0.072707534 |
| ABRACL    | 6q24.1          | -0.1087  | 0.033684 | 0.072715741 |

|                 |               |          |          |             |
|-----------------|---------------|----------|----------|-------------|
| KPTN            | 19q13.32      | -0.10869 | 0.033701 | 0.072745327 |
| TRNT1           | 3p26.2        | -0.10868 | 0.033714 | 0.072762844 |
| CRHBP           | 5q13.3        | 0.108679 | 0.033716 | 0.072762844 |
| ZNF716          | 7p11.2        | -0.10867 | 0.03373  | 0.072784782 |
| PPOX            | 1q23.3        | -0.10866 | 0.033754 | 0.072828676 |
| SENP8           | 15q23         | 0.108637 | 0.033785 | 0.072888173 |
| ZNF383          | 19q13.12      | -0.10863 | 0.033803 | 0.0729182   |
| AKAP8           | 19p13.12      | -0.10862 | 0.033813 | 0.072932193 |
| DCAF15          | 19p13.12      | -0.10862 | 0.033821 | 0.072941956 |
| ATF3            | 1q32.3        | 0.1086   | 0.033848 | 0.072990798 |
| HTR3C           | 3q27.1        | 0.108562 | 0.03391  | 0.073116651 |
| KRTAP10-6       | 21q22.3       | -0.10855 | 0.033927 | 0.073146215 |
| C6ORF163        | 6q15          | -0.10854 | 0.033943 | 0.073171985 |
| CAPN13          | 2p23.1        | -0.10853 | 0.033955 | 0.073191214 |
| PSMG4           | 6p25.2        | -0.10852 | 0.033973 | 0.073222349 |
| SCARNA1         | 1p35.3        | -0.10852 | 0.033981 | 0.073231304 |
| LINC00051       | 8q24.3        | -0.10851 | 0.033992 | 0.073244875 |
| SLC9B1          | 4q24          | -0.10851 | 0.034001 | 0.073244875 |
| PAX3            | 2q36.1        | -0.10851 | 0.034001 | 0.073244875 |
| C12ORF56        | 12q14.2       | -0.10851 | 0.034002 | 0.073244875 |
| PES1            | 22q12.2       | -0.1085  | 0.034011 | 0.073255769 |
| FAM183A         | 1p34.2        | -0.1085  | 0.034018 | 0.073264666 |
| OSTM1           | 6q21          | -0.10849 | 0.034037 | 0.073296902 |
| CARD9           | 9q34.3        | -0.10848 | 0.034046 | 0.073307478 |
| LOC93429        | 19q13.32      | -0.10848 | 0.034052 | 0.073309404 |
| C2CD2           | 21q22.3       | 0.108475 | 0.034054 | 0.073309404 |
| ATF6B           | 6p21.32       | -0.10847 | 0.034059 | 0.073311523 |
| SUMO2           | 17q25.1       | -0.10844 | 0.034109 | 0.07341137  |
| PPP1R13L        | 19q13.32      | 0.108439 | 0.034113 | 0.073413491 |
| POTEC           | 18p11.21      | 0.108434 | 0.034122 | 0.073424918 |
| PGBD3           | 10q11.23      | 0.108412 | 0.034159 | 0.073491306 |
| SPCS2P4         | 1p35.3        | -0.10841 | 0.034163 | 0.073491306 |
| CHD1L           | 1q21.1        | 0.108409 | 0.034164 | 0.073491306 |
| ARPC5L          | 9q33.3        | -0.10839 | 0.034187 | 0.073531376 |
| ALX3            | 1p13.3        | -0.10839 | 0.03419  | 0.073531376 |
| IQCF5           | 3p21.2        | 0.108381 | 0.03421  | 0.073565589 |
| TMEM18          | 2p25.3        | -0.10836 | 0.034242 | 0.073626285 |
| MEF2C           | 5q14.3        | -0.10835 | 0.034263 | 0.073665466 |
| ZNF396          | 18q12.2       | 0.108326 | 0.034302 | 0.07374057  |
| FDXACB1         | 11q23.1       | -0.10831 | 0.034323 | 0.073777095 |
| GJA1            | 6q22.31       | -0.10831 | 0.034329 | 0.073783113 |
| CST2            | 20p11.21      | -0.10829 | 0.034367 | 0.073857394 |
| HLX             | 1q41          | -0.10828 | 0.034376 | 0.073864282 |
|                 | 11-Mar 5p15.1 | -0.10828 | 0.034378 | 0.073864282 |
| ZFYVE1          | 14q24.2       | 0.108274 | 0.034389 | 0.073880604 |
| CYBC1           | 17q25.3       | -0.10822 | 0.034487 | 0.07407876  |
| CRYGA           | 2q33.3        | -0.10821 | 0.034489 | 0.07407876  |
| TBC1D9          | 4q31.21       | -0.10821 | 0.034502 | 0.074099337 |
| ADAMTS10        | 19p13.2       | -0.10816 | 0.034586 | 0.074271922 |
| C15ORF40        | 15q25.2       | -0.10815 | 0.034602 | 0.074297799 |
| L3MBTL3         | 6q23.1        | -0.10814 | 0.034614 | 0.074315495 |
| VMP1            | 17q23.1       | -0.10813 | 0.034633 | 0.074348754 |
| LIMS3-LOC440895 | 2q13          | -0.10811 | 0.034671 | 0.074420924 |
| PGA5            | 11q12.2       | 0.108104 | 0.034674 | 0.074420924 |
| RHBG            | 1q22          | -0.1081  | 0.034684 | 0.074433805 |
| AMOTL1          | 11q21         | -0.10809 | 0.034698 | 0.074455017 |
| GCG             | 2q24.2        | 0.108073 | 0.034727 | 0.074509912 |
| OPN1LW          | Xq28          | -0.10805 | 0.034761 | 0.074569761 |

|              |               |          |          |             |
|--------------|---------------|----------|----------|-------------|
| USP49        | 6p21.1        | -0.10805 | 0.034762 | 0.074569761 |
| RAB28        | 4p15.33       | 0.108027 | 0.034804 | 0.074648642 |
| SLC7A7       | 14q11.2       | 0.108026 | 0.034806 | 0.074648642 |
| CHPT1        | 12q23.2       | -0.10801 | 0.034837 | 0.074705453 |
| RMDN3        | 15q15.1       | 0.107994 | 0.034861 | 0.074749015 |
| VENTXP1      | Xp21.3        | -0.10798 | 0.034892 | 0.074807921 |
| SCLY         | 2q37.3        | -0.10797 | 0.034906 | 0.074829161 |
| ST8SIA1      | 12p12.1       | -0.10796 | 0.034918 | 0.074848528 |
| CSPG5        | 3p21.31       | 0.107938 | 0.034954 | 0.074917556 |
| TRAPPC2      | Xp22.2        | -0.10792 | 0.03499  | 0.074986722 |
| ARMC8        | 3q22.3        | 0.107891 | 0.035035 | 0.075074326 |
| PABPC4L      | 4q28.3        | -0.10788 | 0.035048 | 0.075093639 |
| FARSB        | 2q36.1        | -0.10783 | 0.035132 | 0.075265506 |
| DDX47        | 12p13.1       | -0.10783 | 0.035136 | 0.0752661   |
| ARMT1        | 6q25.1        | 0.10782  | 0.035156 | 0.075296364 |
| LOC100129935 | 19q13.2       | -0.10782 | 0.035157 | 0.075296364 |
| FAM120B      | 6q27          | 0.107799 | 0.035192 | 0.075363011 |
| GREB1        | 2p25.1        | -0.10779 | 0.035206 | 0.07538365  |
| NOL3         | 16q22.1       | -0.10778 | 0.035222 | 0.075411441 |
| ETNK1        | 12p12.1       | 0.107756 | 0.035265 | 0.075495515 |
| AMBP         | 9q32          | -0.10773 | 0.035307 | 0.075572318 |
| NANOG        | 12p13.31      | -0.10773 | 0.035309 | 0.075572318 |
| CDC25A       | 3p21.31       | -0.10773 | 0.035318 | 0.075583226 |
| ARMCX2       | Xq22.1        | -0.10769 | 0.035386 | 0.07572115  |
| DNLZ         | 9q34.3        | -0.10768 | 0.0354   | 0.075742285 |
| TMA7         | 3p21.31       | -0.10766 | 0.035425 | 0.075789506 |
| SNORD22      | 11q12.3       | -0.10766 | 0.035431 | 0.07579295  |
| SNORD94      | 2p11.2        | -0.10766 | 0.035437 | 0.075798241 |
| LRRTM4       | 2p12          | -0.10765 | 0.035443 | 0.075802443 |
| PSMB10       | 16q22.1       | 0.107636 | 0.03547  | 0.075847059 |
| IL11RA       | 9p13.3        | -0.10764 | 0.035471 | 0.075847059 |
| CTBP2        | 10q26.13      | 0.107627 | 0.035486 | 0.075870598 |
| SEC31A       | 4q21.22       | 0.107602 | 0.035529 | 0.075953507 |
| LOC100132215 | 2p15          | -0.10758 | 0.035573 | 0.076039223 |
| INSIG1       | 7q36.3        | 0.10757  | 0.035584 | 0.076056116 |
| GOPC         | 6q22.1        | -0.10756 | 0.035593 | 0.076066231 |
| NWD2         | 4p14          | 0.10756  | 0.035601 | 0.076076387 |
| GLIPR1       | 12q21.2       | -0.10755 | 0.035624 | 0.076117394 |
| OR5111       | 11p15.4       | 0.107524 | 0.035664 | 0.076192984 |
| LAG3         | 12p13.31      | 0.107499 | 0.035707 | 0.076277374 |
| DGCR11       | 22q11.21      | 0.10749  | 0.035722 | 0.076302612 |
| IGSF9        | 1q23.2        | 0.107478 | 0.035743 | 0.076338193 |
| ZNF33A       | 10p11.1       | 0.107474 | 0.03575  | 0.076344364 |
| NOC3L        | 10q23.33      | -0.10747 | 0.035757 | 0.076347418 |
| PCDHGB1      | 5q31.3        | -0.10747 | 0.035759 | 0.076347418 |
| BLMH         | 17q11.2       | -0.10747 | 0.035764 | 0.076350159 |
| TRPC3        | 4q27          | -0.10746 | 0.03578  | 0.07637046  |
| ZFH3         | 16q22.2-q22.3 | -0.10746 | 0.035781 | 0.07637046  |
| ZNF304       | 19q13.43      | -0.10745 | 0.035797 | 0.076397317 |
| L1TD1        | 1p31.3        | 0.107429 | 0.035827 | 0.076452629 |
| IRX4         | 5p15.33       | -0.10742 | 0.03584  | 0.07647244  |
| PHF13        | 1p36.31       | -0.10742 | 0.035845 | 0.076475547 |
| GPC6         | 13q31.3-q32.1 | -0.1074  | 0.035879 | 0.076538279 |
| SHISA2       | 13q12.13      | -0.10737 | 0.035925 | 0.076629759 |
| VWA7         | 6p21.33       | 0.107357 | 0.035953 | 0.076679221 |
| PLEKHG7      | 12q22         | -0.10735 | 0.035956 | 0.076679221 |
| BBS1         | 11q13.2       | -0.10734 | 0.035978 | 0.076718561 |
| LEUTX        | 19q13.2       | -0.10734 | 0.03599  | 0.076735619 |

|             |                |          |          |             |
|-------------|----------------|----------|----------|-------------|
| AVPR1B      | 1q32.1         | 0.107327 | 0.036006 | 0.076760314 |
| MADCAM1     | 19p13.3        | 0.107311 | 0.036032 | 0.076808593 |
| KIAA0930    | 22q13.31       | -0.1073  | 0.036049 | 0.076836831 |
| SMIM7       | 19p13.11       | -0.10727 | 0.036096 | 0.076927803 |
| CXCL13      | 4q21.1         | 0.10727  | 0.036105 | 0.076933    |
| GALNT13     | 2q23.3-q24.1   | -0.10727 | 0.036106 | 0.076933    |
| PCDHB19P    | 5q31.3         | -0.10726 | 0.036121 | 0.076956808 |
| ZNF157      | Xp11.3         | -0.10725 | 0.036143 | 0.076994871 |
| CIAO3       | 16p13.3        | -0.10722 | 0.036186 | 0.077072405 |
| TMEM208     | 16q22.1        | -0.10722 | 0.036187 | 0.077072405 |
| ARHGAP5-AS1 | 14q12          | -0.10722 | 0.036196 | 0.077078265 |
| KIAA0895    | 7p14.2         | 0.107216 | 0.036198 | 0.077078265 |
| RPGRIP1L    | 16q12.2        | -0.10721 | 0.036201 | 0.077078265 |
| ARHGAP25    | 2p13.3         | 0.107142 | 0.036329 | 0.077342069 |
| LGALS17A    | 19q13.2        | -0.10712 | 0.036369 | 0.077420148 |
| CYP2F1      | 19q13.2        | -0.1071  | 0.036401 | 0.077479178 |
| POLDIP2     | 17q11.2        | -0.1071  | 0.03641  | 0.077490284 |
| THAP9       | 4q21.22        | -0.10705 | 0.036487 | 0.077645558 |
| NOP9        | 14q12          | 0.107039 | 0.036508 | 0.077680659 |
| STK26       | Xq26.2         | -0.10704 | 0.036511 | 0.077680659 |
| APOD        | 3q29           | -0.10703 | 0.036533 | 0.077719189 |
| MAIP1       | 2q33.1         | -0.10699 | 0.03659  | 0.07783202  |
| DLEU2       | 13q14.2        | -0.10698 | 0.036613 | 0.077873036 |
| DPH5        | 1p21.2         | -0.10697 | 0.036627 | 0.077894668 |
| KIR3DL1     | 19q13.42       | 0.106947 | 0.03667  | 0.077978283 |
| LMNB1       | 5q23.2         | 0.106891 | 0.03677  | 0.078181675 |
| CARMIL3     | 14q11.2        | -0.10689 | 0.036777 | 0.078187969 |
| PSENN       | 19q13.12       | -0.10685 | 0.036836 | 0.078305037 |
| PROKR1      | 2p13.3         | -0.10685 | 0.036841 | 0.078305037 |
| TESC        | 12q24.22       | -0.10685 | 0.036844 | 0.078305037 |
| TRAP1       | 16p13.3        | -0.10683 | 0.036887 | 0.078389312 |
| OTUD4       | 4q31.21        | 0.106801 | 0.036931 | 0.078473663 |
| LRRC46      | 17q21.32       | -0.10679 | 0.036952 | 0.078510438 |
| PRKD2       | 19q13.32       | 0.106774 | 0.036978 | 0.078557895 |
| DOLPP1      | 9q34.11        | 0.106771 | 0.036983 | 0.078558516 |
| NDE1        | 16p13.11       | 0.10676  | 0.037004 | 0.07859088  |
| SLC35B2     | 6p21.1         | -0.10676 | 0.037007 | 0.07859088  |
| ZNF385B     | 2q31.2-q31.3   | -0.10675 | 0.037013 | 0.07859088  |
| FAM209B     | 20q13.31       | -0.10675 | 0.037013 | 0.07859088  |
| ZCCHC7      | 9p13.2         | -0.10675 | 0.037024 | 0.078603968 |
| CDV3        | 3q22.1         | 0.106743 | 0.037033 | 0.078615994 |
| SERPING1    | 11q12.1        | -0.10673 | 0.037048 | 0.078638611 |
| LINC00173   | 12q24.22       | 0.106727 | 0.037061 | 0.078658449 |
| PDC         | 1q31.1         | 0.106699 | 0.037112 | 0.078758388 |
| GALNT17     | 7q11.22        | -0.10666 | 0.03718  | 0.078888264 |
| MEF2D       | 1q22           | 0.10666  | 0.037181 | 0.078888264 |
| RAB21       | 12q21.1        | 0.106652 | 0.037195 | 0.078909312 |
| BAG5        | 14q32.33       | 0.106649 | 0.0372   | 0.07891239  |
| LPCAT2      | 16q12.2        | -0.10664 | 0.037226 | 0.078957959 |
| SEC11C      | 18q21.32       | 0.106604 | 0.037281 | 0.079066535 |
| LYNX1       | 8q24.3         | -0.10653 | 0.037422 | 0.079356451 |
| WDR97       | 8q24.3         | -0.10652 | 0.037436 | 0.079379022 |
| CNTD1       | 17q21.2-q21.31 | -0.1065  | 0.037463 | 0.079426674 |
| PNMA1       | 14q24.3        | 0.106495 | 0.037477 | 0.079447816 |
| PIK3R5      | 17p13.1        | 0.106476 | 0.037512 | 0.079514189 |
| IL17RB      | 3p21.1         | -0.10646 | 0.037546 | 0.07957734  |
| OAS3        | 12q24.13       | 0.106449 | 0.03756  | 0.079592582 |
| ATR         | 3q23           | -0.10645 | 0.037561 | 0.079592582 |



|              |                    |          |          |             |
|--------------|--------------------|----------|----------|-------------|
| GLO1         | 6p21.2             | -0.10645 | 0.037567 | 0.079596502 |
| PROKR2       | 20p12.3            | 0.106426 | 0.037603 | 0.079664301 |
| TTLL12       | 22q13.2            | 0.106408 | 0.037634 | 0.079722906 |
| KRTAP4-8     | 17q21.2            | -0.1064  | 0.037649 | 0.079745983 |
| CBARP        | 19p13.3            | -0.10637 | 0.03771  | 0.079867169 |
| CDK11A       | 1p36.33            | 0.106352 | 0.037735 | 0.079911171 |
| GLYATL3      | 6p12.3             | -0.10634 | 0.037755 | 0.079945804 |
| HENMT1       | 1p13.3             | -0.10634 | 0.03776  | 0.079947108 |
| ASB18        | 2q37.2             | -0.10632 | 0.037788 | 0.079997721 |
| MAPKAPK5-AS1 | 12q24.12           | -0.1063  | 0.037829 | 0.080069608 |
| SNORA41      | 2q33.3             | -0.1063  | 0.03783  | 0.080069608 |
| CHMP5        | 9p13.3             | 0.106293 | 0.037842 | 0.080078431 |
| REG3A        | 2p12               | 0.106293 | 0.037842 | 0.080078431 |
| VPS33A       | 12q24.31           | -0.10629 | 0.037854 | 0.080094693 |
| GPANK1       | 6p21.33            | -0.10625 | 0.037912 | 0.080202701 |
| SLC2A3       | 12p13.31           | -0.10625 | 0.037913 | 0.080202701 |
| NSUN4        | 1p33               | 0.106238 | 0.037942 | 0.080256335 |
| GSTZ1        | 14q24.3            | 0.106208 | 0.037997 | 0.080363057 |
| TRPV5        | 7q34               | 0.106174 | 0.038059 | 0.080486442 |
| PDS5B        | 13q13.1            | -0.10617 | 0.038072 | 0.080504575 |
| SLFN13       | 17q12              | 0.106137 | 0.038127 | 0.08060971  |
| KCNH8        | 3p24.3             | -0.10614 | 0.038129 | 0.08060971  |
| ZNF229       | 19q13.31           | -0.10609 | 0.038211 | 0.080773801 |
| ERP29        | 12q24.13           | 0.106085 | 0.038222 | 0.080789058 |
| NCOA1        | 2p23.3             | 0.106066 | 0.038257 | 0.080853848 |
| FAM71D       | 14q23.3            | -0.10605 | 0.038291 | 0.080917013 |
| EFCAB13      | 17q21.32           | -0.10602 | 0.038336 | 0.081003984 |
| HCST         | 19q13.12           | 0.10601  | 0.03836  | 0.081045135 |
| MISP         | 19p13.3            | 0.10599  | 0.038395 | 0.081111765 |
| CABLES1      | 18q11.2            | 0.105981 | 0.038413 | 0.081135901 |
| GABRA5       | 15q12              | -0.10598 | 0.038415 | 0.081135901 |
| HSPB1P1      | 9q21.13            | -0.10596 | 0.038448 | 0.081197276 |
| SNAPC3       | 9p22.3             | 0.105955 | 0.03846  | 0.081213806 |
| TDRD5        | 1q25.2             | 0.105947 | 0.038476 | 0.081232651 |
| EGFLAM       | 5p13.2-p13.1       | -0.10595 | 0.038477 | 0.081232651 |
| PCDHGB4      | 5q31.3             | -0.10594 | 0.038493 | 0.081258786 |
| KDM2A        | 11q13.2            | -0.10591 | 0.038539 | 0.081346103 |
| HNMT         | 2q22.1             | -0.10591 | 0.038548 | 0.08135241  |
| RBBP9        | 20p11.23           | -0.10591 | 0.03855  | 0.08135241  |
| CPNE3        | 8q21.3             | -0.1059  | 0.038563 | 0.081371481 |
| P2RY8        | Xp22.33 and Yp11.2 | 0.105888 | 0.038584 | 0.08140855  |
| IL17C        | 16q24.2            | 0.105879 | 0.0386   | 0.081433902 |
| PIGC         | 1q24.3             | -0.10588 | 0.038606 | 0.081436261 |
| PARN         | 16p13.12           | -0.10587 | 0.038613 | 0.081443611 |
| DMAC1        | 9p24.1             | -0.10587 | 0.038619 | 0.081446771 |
| CHM          | Xq21.2             | -0.10585 | 0.038657 | 0.081519541 |
| KIF17        | 1p36.12            | -0.10584 | 0.038674 | 0.081545315 |
| ST3GAL6      | 3q12.1             | -0.10583 | 0.038685 | 0.081561112 |
| ADAMDEC1     | 8p21.2             | 0.105831 | 0.03869  | 0.081562597 |
| MRRF         | 9q33.2             | 0.105823 | 0.038704 | 0.08158339  |
| SEPTIN1      | 16p11.2            | 0.105817 | 0.038715 | 0.08159747  |
| CNRIP1       | 2p14               | -0.1058  | 0.03874  | 0.081641787 |
| TOMM22       | 22q13.1            | -0.10579 | 0.038768 | 0.081692006 |
| FAN1         | 15q13.3            | -0.10577 | 0.038795 | 0.081740568 |
| BLVRA        | 7p13               | 0.105766 | 0.038809 | 0.081761398 |
| FOXJ1        | 17q25.1            | -0.10576 | 0.038815 | 0.081765534 |
| CEP350       | 1q25.2             | 0.105755 | 0.03883  | 0.081788772 |
| KIDINS220    | 2p25.1             | -0.10574 | 0.03885  | 0.081821392 |

|           |                 |          |          |             |
|-----------|-----------------|----------|----------|-------------|
| LRATD2    | 8q24.21         | -0.1057  | 0.038924 | 0.081968373 |
| PPA1      | 10q22.1         | -0.1057  | 0.038928 | 0.081968373 |
| RAB7A     | 3q21.3          | -0.10569 | 0.038948 | 0.081994771 |
| C10ORF25  | 10q11.21        | 0.105691 | 0.03895  | 0.081994771 |
| MT1G      | 16q13           | 0.105689 | 0.038952 | 0.081994771 |
| EAF1      | 3p25.1          | 0.105681 | 0.038967 | 0.082016498 |
| FGL2      | 7q11.23         | 0.105674 | 0.038981 | 0.082038231 |
| CAMLG     | 5q31.1          | -0.10565 | 0.03902  | 0.082110587 |
| GNGT2     | 17q21.32        | 0.105648 | 0.039028 | 0.082114429 |
| TMEM38A   | 19p13.11        | 0.105648 | 0.03903  | 0.082114429 |
| NKAIN1    | 1p35.2          | -0.10564 | 0.039052 | 0.082153353 |
| NR2F6     | 19p13.11        | 0.105632 | 0.039058 | 0.082156255 |
| OTOA      | 16p12.2 16p12.2 | -0.10561 | 0.039093 | 0.082222335 |
| KAZN      | 1p36.21         | -0.10561 | 0.039108 | 0.082243715 |
| KDM7A-DT  | 7q34            | -0.10559 | 0.039146 | 0.082308339 |
| TTC29     | 4q31.22         | 0.105585 | 0.039146 | 0.082308339 |
| IQCF1     | 3p21.2          | 0.105571 | 0.039173 | 0.082352021 |
| FKBP5     | 6p21.31         | 0.105569 | 0.039175 | 0.082352021 |
| KLHL32    | 6q16.1          | 0.105553 | 0.039205 | 0.082405982 |
| OR13J1    | 9p13.3          | -0.10552 | 0.039261 | 0.082515118 |
| SACM1L    | 3p21.31         | 0.105505 | 0.039296 | 0.082578396 |
| SLC6A11   | 3p25.3          | 0.105498 | 0.039308 | 0.08259629  |
| KLHL36    | 16q24.1         | -0.10548 | 0.039335 | 0.082644165 |
| KYAT3     | 1p22.2          | 0.105477 | 0.039349 | 0.082665187 |
| WT1       | 11p13           | -0.10547 | 0.039357 | 0.082671947 |
| FRMPD4    | Xp22.2          | -0.10546 | 0.039372 | 0.08269465  |
| SKOR1     | 15q23           | 0.105454 | 0.039392 | 0.082723001 |
| C1S       | 12p13.31        | -0.10545 | 0.039393 | 0.082723001 |
| CHADL     | 22q13.2         | -0.10545 | 0.039407 | 0.082744041 |
| LIPK      | 10q23.31        | -0.10541 | 0.039477 | 0.08288176  |
| PARP9     | 3q21.1          | 0.105392 | 0.039508 | 0.082937444 |
| C10ORF105 | 10q22.1         | 0.105359 | 0.03957  | 0.083059748 |
| TMSB10    | 2p11.2          | -0.10535 | 0.039593 | 0.083098836 |
| MUTYH     | 1p34.1          | -0.10534 | 0.039615 | 0.083135294 |
| DSEL      | 18q22.1         | -0.10532 | 0.039638 | 0.083176029 |
| HS3ST5    | 6q21-q22.1      | -0.10529 | 0.039708 | 0.083313649 |
| ZNF702P   | 19q13.41        | 0.105279 | 0.039721 | 0.083332676 |
| MZT1      | 13q21.33        | -0.10528 | 0.039726 | 0.083334173 |
| RAC2      | 22q13.1         | 0.105218 | 0.039836 | 0.083557164 |
| SGCA      | 17q21.33        | -0.10518 | 0.039909 | 0.08370016  |
| KCNC2     | 12q21.1         | -0.10516 | 0.039947 | 0.083771414 |
| FBXO38    | 5q32            | 0.105157 | 0.039953 | 0.083775095 |
| BSCL2     | 11q12.3         | -0.10515 | 0.039973 | 0.08380922  |
| NRBF2     | 10q21.3         | 0.105138 | 0.039988 | 0.083832199 |
| EMP3      | 19q13.33        | -0.1051  | 0.040064 | 0.083982317 |
| SYNC      | 1p35.1          | -0.10509 | 0.04008  | 0.084007053 |
| POMGNT2   | 3p22.1          | -0.10509 | 0.040089 | 0.084014404 |
| SELENOO   | 22q13.33        | -0.10508 | 0.040092 | 0.084014404 |
| HIST1H4B  | 6p22.2          | -0.10507 | 0.040111 | 0.084045844 |
| RSC1A1    | 1p36.21         | 0.105064 | 0.04013  | 0.084076803 |
| ZNF80     | 3q13.31         | 0.105059 | 0.040139 | 0.084078978 |
| AOC3      | 17q21.31        | -0.10506 | 0.04014  | 0.084078978 |
| SDS       | 12q24.13        | 0.105015 | 0.040223 | 0.084241153 |
| CA9       | 9p13.3          | 0.105013 | 0.040227 | 0.084241153 |
| ABTB2     | 11p13           | -0.10501 | 0.04023  | 0.084241153 |
| OR1L3     | 9q33.2          | -0.10499 | 0.040265 | 0.084306341 |
| TIMM29    | 19p13.2         | -0.10498 | 0.040287 | 0.084343359 |
| WRAP53    | 17p13.1         | 0.104966 | 0.040317 | 0.08439752  |

|           |                |          |          |             |
|-----------|----------------|----------|----------|-------------|
| TLX1NB    | 10q24.31       | -0.10496 | 0.040326 | 0.084407514 |
| IHH       | 2q35           | -0.10495 | 0.040353 | 0.084455835 |
| SREK1     | 5q12.3         | 0.104935 | 0.040377 | 0.084497098 |
| CFAP298   | 21q22.11       | -0.10492 | 0.040405 | 0.084537321 |
| UBE2D1    | 10q21.1        | -0.10492 | 0.040405 | 0.084537321 |
| ZNF382    | 19q13.12       | -0.10491 | 0.040423 | 0.084556711 |
| STPG4     | 2p21           | 0.104911 | 0.040423 | 0.084556711 |
| ODF2L     | 1p22.3         | -0.1049  | 0.040436 | 0.084575643 |
| RGS11     | 16p13.3        | 0.104884 | 0.040474 | 0.084646769 |
| NCKAP1L   | 12q13.13-q13.2 | 0.104874 | 0.040494 | 0.084675395 |
| CCL22     | 16q21          | 0.104873 | 0.040496 | 0.084675395 |
| RPL7L1    | 6p21.1         | -0.10486 | 0.040524 | 0.084724536 |
| ZBTB42    | 14q32.33       | 0.104854 | 0.040533 | 0.084733387 |
| NBPF1     | 1p36.13        | 0.104845 | 0.04055  | 0.084760522 |
| FLVCR1-DT | 1q32.3         | -0.10481 | 0.040622 | 0.084901575 |
| MRPL32    | 7p14.1         | -0.10479 | 0.040646 | 0.084938489 |
| H2AFX     | 11q23.3        | -0.10479 | 0.040648 | 0.084938489 |
| HTN3      | 4q13.3         | -0.10475 | 0.040731 | 0.085103185 |
| NOS3      | 7q36.1         | -0.10473 | 0.040777 | 0.085190836 |
| VPS37D    | 7q11.23        | -0.10471 | 0.040806 | 0.08523481  |
| SEC62     | 3q26.2         | 0.104712 | 0.040806 | 0.08523481  |
| TRAF3     | 14q32.32       | 0.104708 | 0.040814 | 0.085240709 |
| RAB33B    | 4q31.1         | 0.104696 | 0.040836 | 0.085278803 |
| MAFG      | 17q25.3        | -0.10467 | 0.040895 | 0.085389003 |
| WDFY4     | 10q11.23       | 0.104665 | 0.040897 | 0.085389003 |
| SIRPA     | 20p13          | -0.10466 | 0.040912 | 0.085410594 |
| PLAAT5    | 11q12.3        | 0.104647 | 0.040932 | 0.085444502 |
| RNASE3    | 14q11.2        | -0.10463 | 0.040959 | 0.085484201 |
| NPIP13    | 16p11.2        | -0.10463 | 0.04096  | 0.085484201 |
| LYPLA1    | 8q11.23        | -0.10463 | 0.04097  | 0.085496134 |
| C2ORF66   | 2q33.1         | 0.104622 | 0.04098  | 0.085505253 |
| FLG2      | 1q21.3         | -0.10462 | 0.040983 | 0.085505253 |
| CCBE1     | 18q21.32       | -0.1046  | 0.041027 | 0.085587992 |
| CBX2      | 17q25.3        | -0.10456 | 0.041098 | 0.08572672  |
| LAMTOR3   | 4q23           | 0.104533 | 0.041153 | 0.085833208 |
| ZNF808    | 19q13.41       | 0.104527 | 0.041165 | 0.085844201 |
| HAAO      | 2p21           | -0.10453 | 0.041167 | 0.085844201 |
| ZNF777    | 7q36.1         | -0.10452 | 0.041178 | 0.085858887 |
| HNRNPH1   | 5q35.3         | -0.10449 | 0.041236 | 0.085970762 |
| TP53TG1   | 7q21.12        | -0.10449 | 0.041241 | 0.085972325 |
| LINC00461 | 5q14.3         | -0.10448 | 0.041256 | 0.085995091 |
| CD300A    | 17q25.1        | 0.104478 | 0.041261 | 0.085995601 |
| LOXL2     | 8p21.3         | -0.10445 | 0.04131  | 0.086088326 |
| USF1      | 1q23.3         | 0.104446 | 0.041324 | 0.086109186 |
| SNHG12    | 1p35.3         | -0.10443 | 0.041362 | 0.086180066 |
| SLC4A2    | 7q36.1         | -0.10441 | 0.041393 | 0.086234308 |
| PPY       | 17q21.31       | 0.104397 | 0.041419 | 0.086272677 |
| SOX5      | 12p12.1        | -0.1044  | 0.04142  | 0.086272677 |
| SNORD1C   | 17q25.1        | -0.10439 | 0.041428 | 0.086281172 |
| VPS18     | 15q15.1        | 0.104373 | 0.041466 | 0.086350409 |
| CMC1      | 3p24.1         | -0.10435 | 0.04151  | 0.086434647 |
| DOCK10    | 2q36.2         | 0.104344 | 0.041522 | 0.086450296 |
| THBS3     | 1q22           | -0.10434 | 0.041531 | 0.086459787 |
| ELP6      | 3p21.31        | -0.10433 | 0.041553 | 0.086497445 |
| RFPL3     | 22q12.3        | 0.104302 | 0.041606 | 0.086598436 |
| C17ORF98  | 17q12          | -0.1043  | 0.041616 | 0.086610296 |
| GTPBP2    | 6p21.1         | -0.10429 | 0.041634 | 0.086637821 |
| PSMB7     | 9q33.3         | -0.10428 | 0.041641 | 0.086643804 |

|           |               |          |          |             |
|-----------|---------------|----------|----------|-------------|
| MICU2     | 13q12.11      | -0.10428 | 0.041652 | 0.086652061 |
| PLIN5     | 19p13.3       | 0.104277 | 0.041655 | 0.086652061 |
| MAST2     | 1p34.1        | 0.104275 | 0.041658 | 0.086652061 |
| SLC25A5   | Xq24          | 0.104269 | 0.04167  | 0.086667745 |
| SBNO1     | 12q24.31      | 0.104259 | 0.041689 | 0.086699304 |
| MAGEA2    | Xq28          | -0.10426 | 0.041698 | 0.086707339 |
| KLK12     | 19q13.41      | 0.104219 | 0.041769 | 0.086847446 |
| ACRV1     | 11q24.2       | -0.10421 | 0.041789 | 0.08687853  |
| SPRR2B    | 1q21.3        | -0.1042  | 0.041812 | 0.086909179 |
| USP8      | 15q21.2       | 0.104197 | 0.041813 | 0.086909179 |
| RALGDS    | 9q34.13-q34.2 | -0.1042  | 0.041816 | 0.086909179 |
| KYAT1     | 9q34.11       | -0.10418 | 0.041851 | 0.086972634 |
| MGAT2     | 14q21.3       | 0.104171 | 0.041864 | 0.086990135 |
| FAM133CP  | 10q21.1       | -0.10415 | 0.041908 | 0.08707264  |
| ZMYND19   | 9q34.3        | -0.10414 | 0.041935 | 0.08711895  |
| LYG1      | 2q11.2        | 0.104122 | 0.041961 | 0.087164183 |
| CCDC173   | 2q31.1        | 0.104106 | 0.041993 | 0.087214945 |
| MICB      | 6p21.33       | 0.104105 | 0.041994 | 0.087214945 |
| BCL2L11   | 2q13          | 0.10409  | 0.042024 | 0.087267942 |
| CASKIN1   | 16p13.3       | -0.10409 | 0.042032 | 0.087272851 |
| PRPH2     | 6p21.1        | -0.10408 | 0.042035 | 0.087272851 |
| KRTAP10-4 | 21q22.3       | -0.10407 | 0.042067 | 0.08733014  |
| FAM133B   | 7q21.2        | -0.10406 | 0.042077 | 0.087341708 |
| LINC01134 | 1p36.32       | -0.10406 | 0.042083 | 0.087345963 |
| TENM2     | 5q34          | -0.10403 | 0.04214  | 0.087452024 |
| LMAN1L    | 15q24.1       | 0.10403  | 0.042143 | 0.087452024 |
| NSFL1C    | 20p13         | -0.10402 | 0.042169 | 0.087490652 |
| H2BFWT    | Xq22.2        | -0.10402 | 0.042173 | 0.087490652 |
| IPP       | 1p34.1        | 0.104014 | 0.042175 | 0.087490652 |
| ABHD14B   | 3p21.2        | 0.104008 | 0.042187 | 0.087506464 |
| MIEF2     | 17p11.2       | 0.104002 | 0.0422   | 0.087520324 |
| SPARCL1   | 4q22.1        | -0.104   | 0.042202 | 0.087520324 |
| STX17     | 9q31.1        | 0.103993 | 0.042218 | 0.087543227 |
| SAAL1     | 11p15.1       | -0.10399 | 0.042225 | 0.087548804 |
| HCN2      | 19p13.3       | -0.10396 | 0.042275 | 0.087636964 |
| KIAA1755  | 20q11.23      | -0.10396 | 0.042276 | 0.087636964 |
| ATP7A     | Xq21.1        | 0.103961 | 0.042281 | 0.087637678 |
| PIGH      | 14q24.1       | -0.10395 | 0.042294 | 0.087655293 |
| FDPS      | 1q22          | 0.103928 | 0.042346 | 0.0877548   |
| MNS1      | 15q21.3       | 0.103889 | 0.042425 | 0.087908781 |
| ABI3BP    | 3q12.2        | 0.103885 | 0.042432 | 0.087915737 |
| VGLL3     | 3p12.1        | -0.10386 | 0.042486 | 0.088012631 |
| SRGN      | 10q22.1       | 0.103857 | 0.042488 | 0.088012631 |
| MBL1P     | 10q22.3       | -0.10383 | 0.042538 | 0.08809889  |
| TMEM71    | 8q24.22       | 0.103832 | 0.042538 | 0.08809889  |
| NUDT5     | 10p14         | -0.10381 | 0.042576 | 0.088168412 |
| MOB4      | 2q33.1        | -0.1038  | 0.042598 | 0.0882031   |
| ZFP36L2   | 2p21          | 0.103791 | 0.042622 | 0.088244061 |
| RNF7      | 3q23          | -0.10378 | 0.042635 | 0.08826267  |
| ACTL7A    | 9q31.3        | 0.103774 | 0.042655 | 0.088294484 |
| CFAP97    | 4q35.1        | -0.10376 | 0.042684 | 0.088345547 |
| PLEKHG6   | 12p13.31      | -0.10375 | 0.042698 | 0.088365964 |
| LOC344967 | 4p14          | 0.103737 | 0.042729 | 0.088420355 |
| COL4A5    | Xq22.3        | 0.103709 | 0.042785 | 0.088526915 |
| SIRT1     | 10q21.3       | 0.103679 | 0.042845 | 0.088642488 |
| RFX5      | 1q21.3        | -0.10367 | 0.042866 | 0.088677328 |
| CCDC74A   | 2q21.1        | -0.10366 | 0.042884 | 0.088704992 |
| AGPAT3    | 21q22.3       | 0.103656 | 0.042893 | 0.088713797 |

|           |                    |          |          |             |
|-----------|--------------------|----------|----------|-------------|
| EHBP1     | 2p15               | -0.10365 | 0.042902 | 0.088723501 |
| PRKD3     | 2p22.2             | -0.10363 | 0.042937 | 0.088786231 |
| ZSCAN12P1 | 6p22.1             | 0.10362  | 0.042965 | 0.088827889 |
| C12ORF54  | 12q13.11           | -0.10362 | 0.042966 | 0.088827889 |
| DDB1      | 11q12.2            | -0.1036  | 0.043004 | 0.088898122 |
| LINC01588 | 14q21.3            | 0.103595 | 0.043015 | 0.088912273 |
| ZNF576    | 19q13.31           | -0.10358 | 0.043047 | 0.088968877 |
| ATP6V0D2  | 8q21.3             | 0.103532 | 0.043144 | 0.089159292 |
| FGF7      | 15q21.2            | -0.10352 | 0.043164 | 0.089191582 |
| THUMPD1   | 16p12.3            | 0.103493 | 0.043223 | 0.089303819 |
| CHSY3     | 5q23.3             | -0.10346 | 0.043286 | 0.089426071 |
| PARP1     | 1q42.12            | 0.10345  | 0.043309 | 0.089463422 |
| AACSP1    | 5q35.3             | -0.10343 | 0.043343 | 0.089516463 |
| TM4SF18   | 3q25.1             | -0.10343 | 0.043344 | 0.089516463 |
| FAM209A   | 20q13.31           | -0.10342 | 0.043363 | 0.089539633 |
| DMAC2     | 19q13.2            | -0.10342 | 0.043364 | 0.089539633 |
| MED31     | 17p13.1            | 0.10342  | 0.043371 | 0.089545789 |
| PSME3     | 17q21.31           | -0.1034  | 0.04342  | 0.089637977 |
| SLAIN1    | 13q22.3            | 0.103364 | 0.043486 | 0.089763797 |
| OLFML1    | 11p15.4            | -0.10333 | 0.043546 | 0.089879296 |
| RINT1     | 7q22.3             | -0.1033  | 0.043607 | 0.089995873 |
| MTTP      | 4q23               | -0.1033  | 0.043616 | 0.090004758 |
| SDHAP3    | 5p15.33            | 0.103297 | 0.043623 | 0.090009141 |
| ZNF679    | 7q11.21            | -0.10329 | 0.04363  | 0.090012412 |
| SLC44A3   | 1p21.3             | 0.103292 | 0.043633 | 0.090012412 |
| BTN2A1    | 6p22.2             | -0.10329 | 0.043639 | 0.090015867 |
| GPR39     | 2q21.2             | -0.10323 | 0.043749 | 0.090233142 |
| FLT3      | 13q12.2            | 0.103222 | 0.043776 | 0.090279962 |
| RNF149    | 2q11.2             | -0.10321 | 0.043805 | 0.090330304 |
| VSTM4     | 10q11.23           | -0.10319 | 0.043845 | 0.090399245 |
| ACRBP     | 12p13.31           | 0.103187 | 0.043848 | 0.090399245 |
| AKAP17A   | Xp22.33 and Yp11.2 | -0.10318 | 0.043869 | 0.090432818 |
| SLC29A3   | 10q22.1            | -0.10316 | 0.043899 | 0.090486485 |
| GJD4      | 10p11.21           | -0.10316 | 0.043907 | 0.090487945 |
| C1D       | 2p14               | -0.10316 | 0.043909 | 0.090487945 |
| EYA3      | 1p35.3             | 0.103122 | 0.043982 | 0.09061985  |
| NIPA1     | 15q11.2            | 0.103121 | 0.043983 | 0.09061985  |
| GUSBP11   | 22q11.23           | -0.10312 | 0.043986 | 0.09061985  |
| TDH       | 8p23.1             | 0.103112 | 0.044002 | 0.090643202 |
| KIFC1     | 6p21.32            | 0.103105 | 0.044017 | 0.090655872 |
| TMEM184A  | 7p22.3             | -0.1031  | 0.044017 | 0.090655872 |
| SPINK1    | 5q32               | -0.10307 | 0.044083 | 0.090781931 |
| BNIP1     | 5q35.1             | 0.103069 | 0.044092 | 0.090785966 |
| TNRC6A    | 16p12.1            | -0.10307 | 0.044098 | 0.090785966 |
| ANKRD37   | 4q35.1             | 0.103065 | 0.044099 | 0.090785966 |
| OTUD7B    | 1q21.2             | 0.103037 | 0.044157 | 0.090895677 |
| CLEC10A   | 17p13.1            | 0.103024 | 0.044183 | 0.090940598 |
| C11ORF80  | 11q13.2            | -0.10301 | 0.044219 | 0.090997004 |
| CHGB      | 20p12.3            | -0.10301 | 0.044219 | 0.090997004 |
| SLC25A18  | 22q11.21           | 0.103002 | 0.044228 | 0.091006188 |
| DSCR8     | 21q22.13           | -0.10299 | 0.044245 | 0.091031195 |
| SYNGAP1   | 6p21.32            | -0.10299 | 0.04425  | 0.091031195 |
| SHBG      | 17p13.1            | -0.10299 | 0.04426  | 0.091038179 |
| UBE3B     | 12q24.11           | 0.102986 | 0.044262 | 0.091038179 |
| GPR146    | 7p22.3             | -0.10298 | 0.044279 | 0.091063689 |
| ANGPTL2   | 9q33.3             | -0.10295 | 0.044333 | 0.091165402 |
| HDDC3     | 15q26.1            | -0.10295 | 0.044347 | 0.091184512 |
| SPZ1      | 5q14.1             | -0.10293 | 0.04437  | 0.091223279 |

|           |          |          |          |             |
|-----------|----------|----------|----------|-------------|
| THAP3     | 1p36.31  | -0.10292 | 0.044401 | 0.091276045 |
| BRIP1     | 17q23.2  | 0.102913 | 0.044413 | 0.091292416 |
| NR2F2     | 15q26.2  | 0.102894 | 0.044453 | 0.091365789 |
| RLBP1     | 15q26.1  | -0.10287 | 0.044502 | 0.091455939 |
| FMNL3     | 12q13.12 | -0.10287 | 0.04451  | 0.091463938 |
| TULP4     | 6q25.3   | -0.10283 | 0.044586 | 0.091597919 |
| MEGF6     | 1p36.32  | 0.10283  | 0.044586 | 0.091597919 |
| TCTN1     | 12q24.11 | -0.10283 | 0.044589 | 0.091597919 |
| SFSWAP    | 12q24.33 | -0.1028  | 0.044649 | 0.091704551 |
| IQSEC2    | Xp11.22  | 0.102799 | 0.04465  | 0.091704551 |
| LSM4      | 19p13.11 | -0.10276 | 0.044725 | 0.091849158 |
| RTKN2     | 10q21.2  | 0.102761 | 0.04473  | 0.091849158 |
| CFAP300   | 11q22.1  | -0.10272 | 0.044809 | 0.092002027 |
| PCDHB3    | 5q31.3   | -0.10271 | 0.044827 | 0.092030035 |
| SFRP5     | 10q24.2  | -0.10271 | 0.044845 | 0.092057919 |
| SNX20     | 16q12.1  | 0.102704 | 0.044851 | 0.092059294 |
| SH3PXD2A  | 10q24.33 | 0.1027   | 0.044858 | 0.092065595 |
| MACROD1   | 11q13.1  | -0.10269 | 0.044886 | 0.092112636 |
| ACSS1     | 20p11.21 | -0.10267 | 0.044921 | 0.092175447 |
| KCNH6     | 17q23.3  | -0.10264 | 0.04498  | 0.092286285 |
| PRRT2     | 16p11.2  | 0.102624 | 0.045018 | 0.092346456 |
| UFSP2     | 4q35.1   | 0.102624 | 0.045018 | 0.092346456 |
| TMEM201   | 1p36.22  | -0.1026  | 0.045063 | 0.092428817 |
| ADAM5     | 8p11.22  | -0.1026  | 0.045068 | 0.092428817 |
| CEP57     | 11q21    | -0.10257 | 0.045129 | 0.092545606 |
| BSG       | 19p13.3  | 0.102564 | 0.045144 | 0.092565879 |
| TYK2      | 19p13.2  | 0.10256  | 0.045152 | 0.092573138 |
| MOB2      | 11p15.5  | -0.10256 | 0.045158 | 0.092576678 |
| NUP58     | 13q12.13 | -0.10253 | 0.045207 | 0.092666729 |
| MED13     | 17q23.2  | -0.10253 | 0.045223 | 0.092691677 |
| IFI27L2   | 14q32.12 | 0.102517 | 0.045243 | 0.092717845 |
| RNU12-2P  | Xp11.3   | -0.10252 | 0.045245 | 0.092717845 |
| TPH1      | 11p15.1  | 0.102474 | 0.045333 | 0.092888229 |
| PHGR1     | 15q15.1  | 0.102465 | 0.045352 | 0.092908787 |
| RALGPS1   | 9q33.3   | 0.102465 | 0.045353 | 0.092908787 |
| MOSPD2    | Xp22.2   | -0.10246 | 0.045372 | 0.092938453 |
| TDG       | 12q23.3  | 0.102449 | 0.045387 | 0.09295973  |
| TMEM235   | 17q25.3  | -0.10244 | 0.045396 | 0.092969439 |
| LOC341056 | 11q24.1  | -0.10244 | 0.045405 | 0.092977102 |
| CDRT15P1  | 17p12    | 0.102437 | 0.045412 | 0.092982802 |
| CRYBA1    | 17q11.2  | -0.10243 | 0.045426 | 0.093002042 |
| ALDH8A1   | 6q23.3   | -0.10243 | 0.045436 | 0.093013065 |
| CDKN2B    | 9p21.3   | 0.102415 | 0.045459 | 0.093048701 |
| RNF150    | 4q31.21  | -0.10241 | 0.045463 | 0.093048701 |
| BUB3      | 10q26.13 | 0.10241  | 0.04547  | 0.093054451 |
| IL19      | 1q32.1   | 0.102391 | 0.04551  | 0.09312621  |
| NRN1      | 6p25.1   | 0.102369 | 0.045556 | 0.09321199  |
| ICOS      | 2q33.2   | 0.102319 | 0.045662 | 0.093417653 |
| PPFIA2    | 12q21.31 | -0.1023  | 0.045699 | 0.093484537 |
| CLPX      | 15q22.31 | 0.102298 | 0.045706 | 0.093489464 |
| CDCA5     | 11q13.1  | -0.10229 | 0.045724 | 0.093516468 |
| LRRN1     | 3p26.2   | -0.10228 | 0.045738 | 0.093536309 |
| FAM160B2  | 8p21.3   | 0.102275 | 0.045756 | 0.093562057 |
| RFC1      | 4p14     | 0.102271 | 0.045764 | 0.093567754 |
| AKR7A2P1  | 1p13.2   | 0.10227  | 0.045768 | 0.093567754 |
| ENTPD2    | 9q34.3   | 0.102257 | 0.045795 | 0.093614995 |
| HIGD2A    | 5q35.2   | 0.102247 | 0.045815 | 0.093644845 |
| GRK5      | 10q26.11 | 0.102245 | 0.04582  | 0.093646993 |

|             |          |          |          |             |
|-------------|----------|----------|----------|-------------|
| SLC1A5      | 19q13.32 | -0.10223 | 0.045851 | 0.093699874 |
| PAEP        | 9q34.3   | -0.10222 | 0.045872 | 0.093733956 |
| AFG3L1P     | 16q24.3  | -0.1022  | 0.045926 | 0.093834795 |
| MYO1G       | 7p13     | 0.102186 | 0.045946 | 0.093863588 |
| CPLANE2     | 1p36.13  | 0.102184 | 0.04595  | 0.093863588 |
| FRS2        | 12q15    | 0.102182 | 0.045955 | 0.093865296 |
| PDCD4       | 10q25.2  | 0.102145 | 0.046035 | 0.094017524 |
| LIN52       | 14q24.3  | 0.10212  | 0.046087 | 0.094114353 |
| LDB3        | 10q23.2  | -0.10211 | 0.046106 | 0.094144308 |
| WRB         | 21q22.2  | 0.102108 | 0.046114 | 0.094150755 |
| SYNDIG1L    | 14q24.3  | -0.10208 | 0.046171 | 0.094256572 |
| RDM1        | 17q12    | -0.10208 | 0.046181 | 0.094269192 |
| ANO6        | 12q12    | -0.10207 | 0.046202 | 0.094302066 |
| IFT88       | 13q12.11 | -0.10206 | 0.046208 | 0.09430378  |
| MXI1        | 10q25.2  | 0.102056 | 0.046225 | 0.094329089 |
| SLC9A6      | Xq26.3   | 0.102053 | 0.046231 | 0.094332692 |
| SIRT7       | 17q25.3  | 0.102049 | 0.04624  | 0.094340071 |
| SNHG4       | 5q31.2   | -0.10205 | 0.046245 | 0.094340844 |
| SELENOP     | 5p12     | 0.10204  | 0.046258 | 0.094358609 |
| FAM111A     | 11q12.1  | 0.102036 | 0.046267 | 0.094366936 |
| DCLK3       | 3p22.2   | -0.10203 | 0.046275 | 0.09437288  |
| FES         | 15q26.1  | -0.10203 | 0.046284 | 0.094381705 |
| CYTH4       | 22q13.1  | 0.101997 | 0.046351 | 0.094510021 |
| LRRK2       | 12q12    | -0.10197 | 0.046416 | 0.094632801 |
| CDPF1       | 22q13.31 | -0.10196 | 0.046421 | 0.094633577 |
| PPM1B       | 2p21     | 0.101956 | 0.04644  | 0.094661798 |
| SNORA67     | 17p13.1  | -0.10194 | 0.046469 | 0.094712159 |
| SLC25A31    | 4q28.1   | -0.10193 | 0.046491 | 0.094746482 |
| GOLGA6L5P   | 15q25.2  | -0.10193 | 0.046499 | 0.09475311  |
| FAM174A     | 5q21.1   | 0.101907 | 0.046546 | 0.094839193 |
| SP4         | 7p15.3   | -0.1019  | 0.046559 | 0.094857035 |
| RBM41       | Xq22.3   | -0.1019  | 0.046565 | 0.094858739 |
| FNDC9       | 5q33.3   | -0.1019  | 0.046571 | 0.094862143 |
| NQO1        | 16q22.1  | 0.101876 | 0.046612 | 0.094936192 |
| SNORD116-20 | 15q11.2  | -0.10183 | 0.046707 | 0.095119658 |
| TSACC       | 1q22     | -0.10183 | 0.046714 | 0.09512284  |
| MORN1       | 1p36.32  | 0.101827 | 0.046718 | 0.095123149 |
| FHIT        | 3p14.2   | -0.10182 | 0.046742 | 0.095161517 |
| SLC12A6     | 15q14    | 0.101806 | 0.046765 | 0.095195403 |
| SYNPO2      | 4q26     | -0.1018  | 0.046768 | 0.095195403 |
| RBM11       | 21q11.2  | -0.10179 | 0.046798 | 0.095246322 |
| MSGN1       | 2p24.2   | 0.10178  | 0.046821 | 0.095280298 |
| MDGA2       | 14q21.3  | -0.10178 | 0.046824 | 0.095280298 |
| PAXIP1-AS2  | 7q36.2   | 0.101771 | 0.04684  | 0.095302191 |
| MRGPRX3     | 11p15.1  | -0.10174 | 0.046917 | 0.095449763 |
| TAS2R41     | 7q35     | 0.101711 | 0.04697  | 0.095535701 |
| RPL13AP6    | 10q25.2  | -0.10171 | 0.046975 | 0.095535701 |
| CEP44       | 4q34.1   | -0.10171 | 0.046976 | 0.095535701 |
| GOLGA6L9    | 15q25.2  | -0.10171 | 0.046978 | 0.095535701 |
| ARPC5       | 1q25.3   | 0.101704 | 0.046987 | 0.095543163 |
| SBSN        | 19q13.12 | -0.10169 | 0.047013 | 0.095586897 |
| YTHDF3      | 8q12.3   | -0.10164 | 0.047121 | 0.095796736 |
| TOPAZ1      | 3p21.31  | 0.101634 | 0.047139 | 0.095823215 |
| KRT81       | 12q13.13 | -0.10162 | 0.047172 | 0.09587079  |
| ULK1        | 12q24.33 | -0.10162 | 0.047172 | 0.09587079  |
| CCS         | 11q13.2  | -0.1016  | 0.047213 | 0.095942978 |
| PLPPR5      | 1p21.3   | -0.1016  | 0.047218 | 0.095942978 |
| CRELD1      | 3p25.3   | -0.1016  | 0.047222 | 0.095942978 |

|           |                  |          |          |             |
|-----------|------------------|----------|----------|-------------|
| RTEL1     | 20q13.33         | -0.10158 | 0.047259 | 0.096008843 |
| ESS2      | 22q11.21 22q11.2 | -0.10157 | 0.047287 | 0.096056548 |
| GOLGA6A   | 15q24.1          | -0.10156 | 0.047298 | 0.096067991 |
| CD84      | 1q23.3           | 0.101556 | 0.04731  | 0.096083966 |
| KRI1      | 19p13.2          | -0.10152 | 0.047382 | 0.096214954 |
| BORCS8    | 19p13.11         | -0.10152 | 0.047384 | 0.096214954 |
| BET1      | 7q21.3           | -0.10152 | 0.047394 | 0.096224377 |
| PRKAR1A   | 17q24.2          | 0.101498 | 0.047436 | 0.096300952 |
| DAD1      | 14q11.2          | 0.101492 | 0.04745  | 0.09631806  |
| ATP6V0A4  | 7q34             | -0.10149 | 0.047456 | 0.096320252 |
| ZNF843    | 16p11.2          | -0.10146 | 0.047525 | 0.096452267 |
| EID1      | 15q21.1          | -0.10144 | 0.047574 | 0.096540422 |
| LIPA      | 10q23.31         | 0.101412 | 0.047626 | 0.096636444 |
| NR5A1     | 9q33.3           | -0.1014  | 0.047661 | 0.096697711 |
| ZFC3H1    | 12q21.1          | -0.10139 | 0.047666 | 0.096697711 |
| PRR34-AS1 | 22q13.31         | -0.10138 | 0.047695 | 0.096746655 |
| GMIP      | 19p13.11         | 0.101375 | 0.047708 | 0.09676366  |
| RBBP6     | 16p12.1          | -0.10137 | 0.047713 | 0.09676366  |
| NXN       | 17p13.3          | -0.10135 | 0.047755 | 0.096839617 |
| CCDC141   | 2q31.2           | 0.101337 | 0.047791 | 0.096903303 |
| ANKRD35   | 1q21.1           | -0.10133 | 0.047796 | 0.096904217 |
| BMX       | Xp22.2           | 0.10131  | 0.047852 | 0.097006926 |
| NOX3      | 6q25.3           | -0.1013  | 0.047866 | 0.097024617 |
| CD14      | 5q31.3           | 0.101269 | 0.047942 | 0.097169853 |
| ANAPC4    | 4p15.2           | -0.10124 | 0.047999 | 0.097276054 |
| FAM223B   | Xq28             | -0.10123 | 0.048026 | 0.097320609 |
| ANAPC16   | 10q22.1          | -0.10121 | 0.048071 | 0.097402515 |
| HMG2      | 1p36.11          | 0.101202 | 0.04809  | 0.097425856 |
| DPP7      | 9q34.3           | -0.1012  | 0.048093 | 0.097425856 |
| DLEC1     | 3p22.2           | 0.101175 | 0.048151 | 0.097533384 |
| ACTL6B    | 7q22.1           | -0.10117 | 0.048155 | 0.097533384 |
| PARVB     | 22q13.31         | -0.10117 | 0.048166 | 0.097545082 |
| HCCAT5    | 16q22.3          | -0.10116 | 0.048183 | 0.09756863  |
| HOXB5     | 17q21.32         | 0.101146 | 0.048215 | 0.097623305 |
| FRMD5     | 15q15.3          | -0.10113 | 0.04825  | 0.097686214 |
| GLMP      | 1q22             | 0.101099 | 0.04832  | 0.097816188 |
| ZNF57     | 19p13.3          | 0.101088 | 0.048343 | 0.097850092 |
| ADGRD2    | 9q33.3           | -0.10109 | 0.048346 | 0.097850092 |
| SAP30     | 4q34.1           | 0.101075 | 0.048373 | 0.097895389 |
| CACNA1B   | 9q34.3           | -0.10107 | 0.048379 | 0.097896701 |
| DPY19L2P1 | 7p14.2           | -0.10103 | 0.048473 | 0.098076719 |
| PRKG2     | 4q21.21          | -0.10102 | 0.048496 | 0.098113756 |
| SCCPDH    | 1q44             | 0.101002 | 0.048536 | 0.098177337 |
| DCLK1     | 13q13.3          | -0.101   | 0.048537 | 0.098177337 |
| FAM180A   | 7q33             | -0.10099 | 0.048567 | 0.098227206 |
| LINC00294 | 11p13            | 0.100986 | 0.048572 | 0.098227206 |
| MAGT1     | Xq21.1           | -0.10096 | 0.048621 | 0.098317746 |
| MBNL2     | 13q32.1          | -0.10094 | 0.048668 | 0.098394514 |
| CACNA1C   | 12p13.33         | 0.100943 | 0.048669 | 0.098394514 |
| RPEL1     | 10q24.33         | -0.10094 | 0.048677 | 0.09840118  |
| ZC3H11A   | 1q32.1           | 0.100902 | 0.04876  | 0.098558311 |
| PSCA      | 8q24.3           | 0.100889 | 0.04879  | 0.098605886 |
| DLEU1     | 13q14.2-q14.3    | -0.10089 | 0.048793 | 0.098605886 |
| RPS19BP1  | 22q13.1          | -0.10088 | 0.048803 | 0.098614519 |
| EPHA5     | 4q13.1-q13.2     | -0.10085 | 0.048883 | 0.098766234 |
| TMEM155   | 4q27             | -0.10082 | 0.048936 | 0.098863398 |
| ENTPD1    | 10q24.1          | -0.10082 | 0.048946 | 0.09887348  |
| CNTN2     | 1q32.1           | -0.1008  | 0.048991 | 0.098954745 |



|          |               |          |          |             |
|----------|---------------|----------|----------|-------------|
| FAM24B   | 10q26.13      | -0.10077 | 0.049069 | 0.099102618 |
| SMIM32   | 5q31.1        | 0.100752 | 0.049098 | 0.099152472 |
| GLRX5    | 14q32.13      | 0.100743 | 0.049119 | 0.099184889 |
| KHDC4    | 1q22          | -0.10073 | 0.049142 | 0.099221081 |
| EXOSC9   | 4q27          | 0.100682 | 0.049257 | 0.099443267 |
| MYB      | 6q23.3        | -0.10068 | 0.049269 | 0.099455894 |
| TLCD4    | 1p21.3        | 0.100666 | 0.049294 | 0.099497091 |
| CLASRP   | 19q13.32      | -0.10066 | 0.049306 | 0.099510709 |
| MTERF4   | 2q37.3        | 0.100639 | 0.049355 | 0.099599244 |
| SMC6     | 2p24.2        | -0.10062 | 0.049403 | 0.099686857 |
| RPS28    | 19p13.2       | -0.10058 | 0.049491 | 0.099855553 |
| PSMC3IP  | 17q21.2       | -0.10057 | 0.04952  | 0.099903778 |
| TUBA1B   | 12q13.12      | 0.10056  | 0.049534 | 0.099920405 |
| HBD      | 11p15.4       | -0.10056 | 0.04954  | 0.099922622 |
| PASK     | 2q37.3        | -0.10053 | 0.049595 | 0.100024887 |
| ANKRD28  | 3p25.1        | 0.10053  | 0.049602 | 0.100027677 |
| TMIGD1   | 17q11.2       | 0.100506 | 0.049657 | 0.100128522 |
| MCCC1    | 3q27.1        | 0.100494 | 0.049685 | 0.10017367  |
| EFNA1    | 1q22          | -0.10049 | 0.049689 | 0.10017367  |
| PANK2    | 20p13         | -0.10048 | 0.049707 | 0.100199251 |
| FGF4     | 11q13.3       | 0.100441 | 0.049806 | 0.100388133 |
| LILRA3   | 19q13.4       | 0.100406 | 0.049886 | 0.100540546 |
| TAGAP    | 6q25.3        | 0.100398 | 0.049905 | 0.100567853 |
| CRYGC    | 2q33.3        | -0.10039 | 0.049925 | 0.100598428 |
| SEC61G   | 7p11.2        | -0.10038 | 0.049945 | 0.100629121 |
| SCARNA20 | 17q23.2       | -0.10036 | 0.04999  | 0.100707804 |
| LSM3     | 3p25.1        | -0.10036 | 0.049994 | 0.100707804 |
| IFIT2    | 10q23.31      | 0.100353 | 0.050006 | 0.100720723 |
| SPNS2    | 17p13.2       | 0.100351 | 0.050012 | 0.100720723 |
| ANKRD50  | 4q28.1        | 0.100349 | 0.050016 | 0.100720723 |
| TMEM127  | 2q11.2        | 0.100343 | 0.050029 | 0.100737283 |
| PKN1     | 19p13.12      | -0.10034 | 0.050034 | 0.100737283 |
| BPIFB1   | 20q11.21      | 0.100336 | 0.050045 | 0.100749869 |
| ZNF638   | 2p13.3-p13.2  | -0.1003  | 0.050137 | 0.10092414  |
| PITRM1   | 10p15.2       | 0.100289 | 0.050155 | 0.100949875 |
| ZNF678   | 1q42.13       | 0.100285 | 0.050164 | 0.100957148 |
| UBL4B    | 1p13.3        | -0.10026 | 0.050212 | 0.101036089 |
| NMUR1    | 2q37.1        | -0.10026 | 0.050213 | 0.101036089 |
| HOXA6    | 7p15.2        | -0.10023 | 0.050293 | 0.101188209 |
| LRRC41   | 1p34.1-p33    | -0.1002  | 0.050348 | 0.101287339 |
| GPRIN1   | 5q35.2        | 0.100201 | 0.050357 | 0.101296155 |
| MRPL54   | 19p13.3       | 0.100198 | 0.050363 | 0.101297975 |
| AICDA    | 12p13.31      | 0.100189 | 0.050385 | 0.10133131  |
| MAGED4B  | Xp11.22       | -0.10017 | 0.050428 | 0.101408612 |
| TGM7     | 15q15.2-q15.3 | -0.10016 | 0.050448 | 0.101431889 |
| PRDM1    | 6q21          | 0.100158 | 0.050456 | 0.101431889 |
| AGXT2    | 5p13.2        | 0.100158 | 0.050456 | 0.101431889 |
| CLBA1    | 14q32.33      | -0.10016 | 0.05046  | 0.101431889 |
| ITGAE    | 17p13.2       | 0.100151 | 0.050473 | 0.101447748 |
| CFAP61   | 20p11.23      | 0.100143 | 0.050492 | 0.101474703 |
| RHOA     | 1q42.13       | 0.100139 | 0.050499 | 0.101479423 |
| C7ORF65  | 7p12.3        | -0.10013 | 0.050512 | 0.101494839 |
| PI15     | 8q21.13       | -0.10013 | 0.050527 | 0.101516088 |
| IL2RA    | 10p15.1       | 0.100124 | 0.050535 | 0.10152042  |
| TXNDC2   | 18p11.22      | -0.10011 | 0.050565 | 0.101570416 |
| C5       | 9q33.2        | 0.100104 | 0.05058  | 0.101591703 |
| EQTN     | 9p21.2        | 0.100082 | 0.050631 | 0.101683378 |
| SPATA9   | 5q15          | -0.10008 | 0.05064  | 0.101683378 |

|           |             |          |          |             |
|-----------|-------------|----------|----------|-------------|
| CKS1B     | 1q21.3      | -0.10008 | 0.050641 | 0.101683378 |
| HLA-DPA1  | 6p21.32     | 0.100068 | 0.050665 | 0.101721304 |
| TCIRG1    | 11q13.2     | 0.100046 | 0.050715 | 0.101811409 |
| STK17A    | 7p13        | 0.100043 | 0.050722 | 0.101814248 |
| CETN3     | 5q14.3      | -0.10001 | 0.050791 | 0.10194241  |
| UBE2R2    | 9p13.3      | -0.10001 | 0.050796 | 0.10194241  |
| FBXO48    | 2p13.3      | -0.1     | 0.050818 | 0.101977274 |
| GLCCI1    | 7p21.3      | -0.09999 | 0.050844 | 0.102014217 |
| EMX2      | 10q26.11    | -0.09999 | 0.050847 | 0.102014217 |
| PPIAL4C   | 1q21.2      | -0.09998 | 0.050867 | 0.102037017 |
| MUS81     | 11q13.1     | -0.09998 | 0.050868 | 0.102037017 |
| EDARADD   | 1q42.3-q43  | -0.09997 | 0.050883 | 0.102056953 |
| CD83      | 6p23        | -0.09997 | 0.050899 | 0.102077898 |
| LRRC8C    | 1p22.2      | 0.099964 | 0.050906 | 0.102082758 |
| MTAP      | 9p21.3      | -0.09995 | 0.05094  | 0.102139915 |
| UBE2V2    | 8q11.21     | -0.09994 | 0.050968 | 0.102179825 |
| PSTPIP1   | 15q24.3     | 0.099937 | 0.05097  | 0.102179825 |
| VLDLR     | 9p24.2      | -0.09991 | 0.051021 | 0.102272265 |
| SLC14A2   | 18q12.3     | 0.09988  | 0.051102 | 0.102424129 |
| STT3A     | 11q24.2     | 0.099846 | 0.051181 | 0.102572363 |
| KRT71     | 12q13.13    | -0.09984 | 0.05119  | 0.102578924 |
| KLHDC3    | 6p21.1      | -0.09983 | 0.051214 | 0.102616275 |
| MXRA5     | Xp22.33     | -0.09983 | 0.051218 | 0.102616275 |
| KISS1R    | 19p13.3     | -0.09983 | 0.051229 | 0.102627272 |
| RFFL      | 17q12       | 0.099814 | 0.051256 | 0.102671483 |
| TEX33     | 22q12.3     | 0.099807 | 0.051272 | 0.102693375 |
| TRIO      | 5p15.2      | -0.09979 | 0.051313 | 0.102765122 |
| ADAM12    | 10q26.2     | -0.09979 | 0.051323 | 0.102774052 |
| CCL13     | 17q12       | 0.099737 | 0.051438 | 0.102993785 |
| FAM99B    | 11p15.5     | 0.099728 | 0.051458 | 0.103015217 |
| TMEM135   | 11q14.2     | 0.099726 | 0.051463 | 0.103015217 |
| MESD      | 15q25.1     | 0.099726 | 0.051464 | 0.103015217 |
| SNORA5A   | 7p13        | -0.0997  | 0.051522 | 0.103120615 |
| ASIC2     | 17q11.2-q12 | -0.0997  | 0.051528 | 0.103123643 |
| ARL13A    | Xq22.1      | -0.09968 | 0.051579 | 0.103215535 |
| SLC43A2   | 17p13.3     | -0.09967 | 0.05159  | 0.103226397 |
| NRN1L     | 16q22.1     | -0.09966 | 0.051625 | 0.103285166 |
| BCRP3     | 22q11.23    | -0.09965 | 0.051638 | 0.103297941 |
| CCDC124   | 19p13.11    | -0.09965 | 0.051641 | 0.103297941 |
| RAPGEF2   | 4q32.1      | -0.09962 | 0.051707 | 0.103418618 |
| GAST      | 17q21.2     | -0.0996  | 0.051753 | 0.103501769 |
| EVC       | 4p16.2      | -0.09957 | 0.051827 | 0.103637923 |
| GSTT4     | 22q11.23    | 0.099541 | 0.0519   | 0.103774755 |
| ITGA5     | 12q13.13    | -0.09953 | 0.051927 | 0.103817849 |
| THRSP     | 11q14.1     | -0.09948 | 0.052047 | 0.104047476 |
| TGM4      | 3p21.31     | 0.099475 | 0.052055 | 0.104052812 |
| LINC00626 | 1q24.2      | -0.09947 | 0.052061 | 0.10405434  |
| AK3       | 9p24.1      | -0.09947 | 0.052071 | 0.104064038 |
| FAM86FP   | 12p13.31    | 0.099461 | 0.052089 | 0.104090417 |
| CCDC15    | 11q24.2     | -0.09945 | 0.052118 | 0.104137234 |
| NDUFAF2   | 5q12.1      | -0.09943 | 0.052152 | 0.104194288 |
| APEH      | 3p21.31     | 0.09942  | 0.052188 | 0.104255459 |
| SCARNA5   | 2q37.1      | -0.09941 | 0.052205 | 0.104279164 |
| PLCG2     | 16q23.3     | 0.099393 | 0.052251 | 0.104361509 |
| MST1P2    | 1p36.13     | -0.09937 | 0.052306 | 0.104461136 |
| GPR31     | 6q27        | 0.099365 | 0.052318 | 0.104473504 |
| DIRAS1    | 19p13.3     | -0.09936 | 0.052326 | 0.104480251 |
| IRX6      | 16q12.2     | -0.09934 | 0.052388 | 0.104594148 |

|           |              |          |          |             |
|-----------|--------------|----------|----------|-------------|
| PRPS2     | Xp22.2       | -0.09933 | 0.052407 | 0.104619834 |
| PLAUR     | 19q13.31     | 0.099315 | 0.052436 | 0.104666406 |
| FMO2      | 1q24.3       | -0.09931 | 0.05244  | 0.104666406 |
| RAMAC     | 15q25.2      | -0.09929 | 0.052508 | 0.104783261 |
| UBQLN3    | 11p15.4      | 0.099285 | 0.052509 | 0.104783261 |
| RBM27     | 5q32         | 0.099264 | 0.052559 | 0.104871477 |
| C1QC      | 1p36.12      | 0.099236 | 0.052625 | 0.104993627 |
| HINT1     | 5q23.3       | 0.099224 | 0.052655 | 0.105041798 |
| CYP19A1   | 15q21.2      | -0.0992  | 0.052711 | 0.105143059 |
| LINC01000 | 7q32.1       | -0.0992  | 0.052721 | 0.105152605 |
| ELP2      | 18q12.2      | 0.09919  | 0.052735 | 0.105164266 |
| SNORA65   | 9q33.3       | -0.09919 | 0.052739 | 0.105164266 |
| OR2W3     | 1q44         | 0.099187 | 0.052743 | 0.105164266 |
| AP1M2     | 19p13.2      | 0.099185 | 0.052748 | 0.105164266 |
| HOXC8     | 12q13.13     | 0.099161 | 0.052805 | 0.105268737 |
| EAF2      | 3q13.33      | 0.099157 | 0.052815 | 0.105278268 |
| RASIP1    | 19q13.33     | -0.09915 | 0.05283  | 0.105297055 |
| SH2D7     | 15q25.1      | 0.099149 | 0.052835 | 0.105297055 |
| VEZF1     | 17q22        | -0.09914 | 0.05286  | 0.105335478 |
| KIZ       | 20p11.23     | -0.09913 | 0.052871 | 0.105346649 |
| B4GALNT3  | 12p13.33     | 0.099132 | 0.052876 | 0.10534751  |
| CSF2RB    | 22q12.3      | 0.099127 | 0.052888 | 0.105355422 |
| CNGA1     | 4p12         | 0.099126 | 0.052891 | 0.105355422 |
| RNF175    | 4q31.3       | -0.09912 | 0.052901 | 0.10536447  |
| KHSRP     | 19p13.3      | -0.09912 | 0.052914 | 0.105380867 |
| CARD8     | 19q13.33     | -0.09911 | 0.052937 | 0.105416801 |
| SYAP1     | Xp22.2       | -0.0991  | 0.05295  | 0.105432083 |
| IL36RN    | 2q14.1       | -0.0991  | 0.052957 | 0.105434599 |
| SH3BP1    | 22q13.1      | 0.099081 | 0.052997 | 0.105505046 |
| C7ORF66   | 7q31.1       | 0.099067 | 0.053032 | 0.105563064 |
| AARS      | 16q22.1      | -0.09904 | 0.053107 | 0.105688247 |
| IFT74     | 9p21.2       | -0.09904 | 0.053108 | 0.105688247 |
| BNC2      | 9p22.3-p22.2 | -0.09903 | 0.053111 | 0.105688247 |
| PPFIA3    | 19q13.33     | -0.09903 | 0.053133 | 0.105722197 |
| LINC00476 | 9q22.32      | -0.09902 | 0.053157 | 0.105759258 |
| ADGRB3    | 6q12-q13     | -0.09901 | 0.053166 | 0.105763867 |
| MAGEB1    | Xp21.2       | -0.09901 | 0.05317  | 0.105763867 |
| DDX12P    | 12p13.31     | -0.099   | 0.053195 | 0.105804278 |
| C6ORF120  | 6q27         | -0.09898 | 0.053251 | 0.1059045   |
| LILRB5    | 19q13.42     | 0.098973 | 0.05326  | 0.105911456 |
| ARFGEF1   | 8q13.2       | -0.09895 | 0.053322 | 0.106024322 |
| PRORP     | 14q13.2      | 0.09894  | 0.05334  | 0.106045595 |
| GOLGA6L10 | 15q25.2      | -0.09894 | 0.053344 | 0.106045595 |
| MLST8     | 16p13.3      | -0.09894 | 0.053348 | 0.106045595 |
| IL15RA    | 10p15.1      | 0.098924 | 0.053377 | 0.106092078 |
| VPS16     | 20p13        | -0.09891 | 0.053405 | 0.106137539 |
| GALNT6    | 12q13.13     | -0.0989  | 0.053437 | 0.106189241 |
| CPEB1     | 15q25.2      | -0.09887 | 0.053517 | 0.10633778  |
| SMIM13    | 6p24.2       | -0.09886 | 0.053525 | 0.106344631 |
| ABCB1     | 7q21.12      | -0.09884 | 0.053576 | 0.106433827 |
| TMEM164   | Xq23         | 0.098827 | 0.053612 | 0.106495002 |
| CYSLTR2   | 13q14.2      | 0.098808 | 0.05366  | 0.106579806 |
| NENF      | 1q32.3       | -0.09879 | 0.053709 | 0.106667383 |
| ZDHHC15   | Xq13.3       | -0.09878 | 0.053724 | 0.106686026 |
| PON3      | 7q21.3       | 0.098778 | 0.053732 | 0.106691558 |
| PPL       | 16p13.3      | -0.09877 | 0.053743 | 0.106702323 |
| SPRR2D    | 1q21.3       | -0.09874 | 0.053829 | 0.106850823 |
| ZFP92     | Xq28         | -0.09874 | 0.05383  | 0.106850823 |

|           |                 |          |          |             |
|-----------|-----------------|----------|----------|-------------|
| ZRANB3    | 2q21.3          | -0.09874 | 0.053834 | 0.106850823 |
| EGFL7     | 9q34.3          | -0.09873 | 0.053845 | 0.106863198 |
| EIF2B3    | 1p34.1          | -0.09873 | 0.053852 | 0.106866164 |
| ACTG1     | 17q25.3         | 0.098725 | 0.053862 | 0.106875387 |
| ECRG4     | 2q12.2          | -0.09872 | 0.053878 | 0.106896736 |
| FAM241B   | 10q22.1         | -0.09871 | 0.053894 | 0.106917827 |
| ZNF181    | 19q13.11        | -0.0987  | 0.053916 | 0.106950007 |
| LBHD1     | 11q12.3         | -0.09868 | 0.05396  | 0.107023785 |
| NAIF1     | 9q34.11         | -0.09868 | 0.053963 | 0.107023785 |
| CCDC110   | 4q35.1          | 0.098679 | 0.053974 | 0.10703326  |
| CXCL12    | 10q11.21        | -0.09867 | 0.053998 | 0.10707045  |
| RPL7A     | 9q34.2          | -0.09866 | 0.054009 | 0.107076401 |
| WDR48     | 3p22.2          | -0.09866 | 0.054011 | 0.107076401 |
| FGF8      | 10q24.32        | 0.098655 | 0.054033 | 0.107108301 |
| CRSP8P    | 5q14.1          | -0.09865 | 0.054055 | 0.107140847 |
| CUX2      | 12q24.11-q24.12 | 0.098615 | 0.054129 | 0.107278262 |
| COLQ      | 3p25.1          | -0.09861 | 0.054149 | 0.107306204 |
| CSRNP3    | 2q24.3          | -0.0986  | 0.054168 | 0.107334752 |
| DCXR      | 17q25.3         | -0.09859 | 0.054198 | 0.107382822 |
| NINJ2     | 12p13.33        | -0.09858 | 0.05422  | 0.107415115 |
| BBOF1     | 14q24.3         | 0.098571 | 0.054239 | 0.10744218  |
| ASH1L-AS1 | 1q22            | -0.09857 | 0.054246 | 0.107443963 |
| LAMP3     | 3q27.1          | 0.098566 | 0.05425  | 0.107443963 |
| PPP1R18   | 6p21.33         | -0.09854 | 0.054308 | 0.10754646  |
| PAX6      | 11p13           | 0.098541 | 0.054313 | 0.107546803 |
| GIT2      | 12q24.11        | 0.098534 | 0.054329 | 0.107568157 |
| GLIPR1L2  | 12q21.2         | -0.09853 | 0.054342 | 0.107583385 |
| GUCY1B2   | 13q14.3         | -0.09853 | 0.054351 | 0.107590496 |
| YBEY      | 21q22.3         | 0.098519 | 0.054367 | 0.107610672 |
| ASTN2     | 9q33.1          | 0.098498 | 0.054417 | 0.107700154 |
| PDE8A     | 15q25.3         | 0.098486 | 0.054446 | 0.107746716 |
| UGT2B28   | 4q13.2          | 0.098479 | 0.054465 | 0.107773435 |
| GBAP1     | 1q22            | 0.098453 | 0.054528 | 0.1078871   |
| RGPD5     | 2q13            | -0.09842 | 0.054609 | 0.108036991 |
| MTREX     | 5q11.2          | 0.098416 | 0.054619 | 0.108042301 |
| DDX11L2   | 2q14.1          | -0.09841 | 0.054623 | 0.108042301 |
| CERS6     | 2q24.3          | 0.09841  | 0.054634 | 0.108053614 |
| ELAVL1    | 19p13.2         | -0.09841 | 0.054644 | 0.108063978 |
| TOR3A     | 1q25.2          | -0.09838 | 0.054703 | 0.108170102 |
| SERPINA4  | 14q32.13        | -0.09837 | 0.054741 | 0.108233646 |
| HMOX1     | 22q12.3         | 0.098352 | 0.054779 | 0.10829828  |
| ZNF583    | 19q13.43        | -0.09835 | 0.054789 | 0.108307609 |
| GRXCR2    | 5q32            | 0.098342 | 0.054803 | 0.108325049 |
| SRSF1     | 17q22           | -0.09833 | 0.054833 | 0.108358641 |
| FAM25A    | 10q23.2         | 0.098328 | 0.054837 | 0.108358641 |
| DNMT1     | 19p13.2         | 0.098328 | 0.054837 | 0.108358641 |
| ZNF175    | 19q13.41        | -0.09832 | 0.054849 | 0.108371615 |
| NACA      | 12q13.3         | -0.09831 | 0.054878 | 0.108418435 |
| PLCL1     | 2q33.1          | -0.0983  | 0.054895 | 0.108441486 |
| SPINT1    | 15q15.1         | 0.098298 | 0.054911 | 0.108463486 |
| PIK3R2    | 19p13.11        | -0.09829 | 0.054939 | 0.108507648 |
| C19ORF24  | 19p13.3         | -0.09827 | 0.054979 | 0.108575047 |
| MACO1     | 1p36.11 1p36.11 | 0.098262 | 0.055001 | 0.108607628 |
| IGF2BP3   | 7p15.3          | 0.098255 | 0.055019 | 0.108632798 |
| CSAD      | 12q13.13        | -0.09824 | 0.055063 | 0.108708738 |
| GNRH2     | 20p13           | 0.098231 | 0.055079 | 0.108730593 |
| GOT2      | 16q21           | 0.098215 | 0.055119 | 0.108798292 |
| IL3       | 5q31.1          | 0.098198 | 0.055161 | 0.108870876 |

|             |                   |          |          |             |
|-------------|-------------------|----------|----------|-------------|
| PSMB4       | 1q21.3            | -0.09819 | 0.055183 | 0.108902718 |
| RPRML       | 17q21.32          | -0.09815 | 0.055275 | 0.109073385 |
| MAGEA9B     | Xq28              | -0.09815 | 0.055284 | 0.109077755 |
| ST8SIA2     | 15q26.1           | -0.09815 | 0.055288 | 0.109077755 |
| SPATA31A5   | 9q12              | -0.09814 | 0.055307 | 0.109105743 |
| STRC        | 15q15.3           | -0.09813 | 0.055323 | 0.109126623 |
| FTHL17      | Xp21.2            | -0.09812 | 0.055354 | 0.109175471 |
| SNHG8       | 4q26              | -0.0981  | 0.055394 | 0.109243906 |
| PCDHB5      | 5q31.3            | -0.09809 | 0.055437 | 0.109317984 |
| CYSLTR1     | Xq21.1            | 0.098028 | 0.055585 | 0.109589433 |
| PANX2       | 22q13.33          | -0.09803 | 0.055592 | 0.109589433 |
| PDK4        | 7q21.3            | 0.098025 | 0.055593 | 0.109589433 |
| KRTAP5-AS1  | 11p15.5           | 0.098024 | 0.055596 | 0.109589433 |
| OTUD6A      | Xq13.1            | -0.09802 | 0.055606 | 0.109598587 |
| PARP3       | 3p21.2            | 0.098013 | 0.055623 | 0.109621043 |
| TBX19       | 1q24.2            | -0.09798 | 0.055709 | 0.109779487 |
| C3ORF67     | 3p14.2            | -0.09797 | 0.05573  | 0.109793947 |
| PSAT1       | 9q21.2            | -0.09797 | 0.055731 | 0.109793947 |
| RASSF5      | 1q32.1            | 0.097969 | 0.055733 | 0.109793947 |
| TEX9        | 15q21.3           | 0.09796  | 0.055755 | 0.109825728 |
| TOMM5       | 9p13.2            | -0.09795 | 0.05577  | 0.10984089  |
| SYT12       | 11q13.2           | 0.097953 | 0.055773 | 0.10984089  |
| ZNF776      | 19q13.43          | 0.097921 | 0.055854 | 0.109989465 |
| DYNC2LI1    | 2p21              | -0.09791 | 0.055873 | 0.110015423 |
| KCND2       | 7q31.31           | -0.09788 | 0.055955 | 0.11016539  |
| UROS        | 10q26.2           | -0.09788 | 0.055966 | 0.110176864 |
| LINC00689   | 7q36.3            | -0.09785 | 0.056043 | 0.11031681  |
| KL          | 13q13.1           | -0.09783 | 0.056085 | 0.110389217 |
| TNFRSF21    | 6p12.3            | 0.09782  | 0.056108 | 0.110421982 |
| CFAP36      | 2p16.1            | -0.09782 | 0.056116 | 0.110421982 |
|             | 6-Mar 5p15.2      | 0.097816 | 0.056118 | 0.110421982 |
| TMEM187     | Xq28              | -0.09781 | 0.056136 | 0.110440795 |
| ALDH1A2     | 15q21.3           | 0.097807 | 0.056141 | 0.110440795 |
| ITGB2       | 21q22.3           | 0.097806 | 0.056144 | 0.110440795 |
| KATNB1      | 16q21             | -0.0978  | 0.056158 | 0.110446922 |
| MYH14       | 19q13.33          | 0.0978   | 0.056158 | 0.110446922 |
| LINC00471   | 2q37.1            | -0.09777 | 0.056239 | 0.110595651 |
| ZFAND2A     | 7p22.3            | -0.09776 | 0.056252 | 0.110610443 |
| SCN7A       | 2q24.3            | -0.09776 | 0.056261 | 0.110616394 |
| KRTAP5-6    | 11p15.5           | 0.09775  | 0.056285 | 0.110653275 |
| TMEM179B    | 11q12.3           | -0.09775 | 0.056294 | 0.110659293 |
| ALDH1L2     | 12q23.3           | -0.09774 | 0.056323 | 0.110705236 |
| GRHL3       | 1p36.11           | -0.09771 | 0.056399 | 0.11083562  |
| CCDC183-AS1 | 9q34.3            | -0.0977  | 0.056401 | 0.11083562  |
| ADAMTS7     | 15q25.1           | -0.0977  | 0.056406 | 0.11083562  |
| PCDHB13     | 5q31.3            | 0.097695 | 0.056426 | 0.110864475 |
| UQCRH       | 1p33              | 0.097689 | 0.056441 | 0.11088365  |
| PAGE2       | Xp11.21           | -0.09768 | 0.05646  | 0.110909987 |
| TEX26       | 13q12.3           | 0.097678 | 0.056469 | 0.110916008 |
| ZNF624      | 17p11.2           | 0.09767  | 0.056489 | 0.110945488 |
| ARL2BP      | 16q13             | -0.09766 | 0.056501 | 0.110958232 |
| ART3        | 4q21.1 4p15.1-p14 | 0.097661 | 0.056511 | 0.110961978 |
| NETO1       | 18q22.3           | -0.09766 | 0.056517 | 0.110961978 |
| ADD2        | 2p13.3            | -0.09766 | 0.05652  | 0.110961978 |
| EP300       | 22q13.2           | 0.09761  | 0.056641 | 0.111188738 |
| TNNI1       | 1q32.1            | 0.097602 | 0.056662 | 0.111218691 |
| PIGP        | 21q22.13          | 0.097594 | 0.056682 | 0.111247627 |
| SLC34A2     | 4p15.2            | 0.097584 | 0.056707 | 0.111286672 |

|          |          |          |          |             |
|----------|----------|----------|----------|-------------|
| RNF11    | 1p32.3   | 0.097525 | 0.056859 | 0.111572706 |
| GPR160   | 3q26.2   | -0.0975  | 0.056913 | 0.111667514 |
| PHLDA3   | 1q32.1   | -0.09749 | 0.056958 | 0.111746186 |
| PEG3     | 19q13.43 | -0.09747 | 0.057011 | 0.111838384 |
| CCNH     | 5q14.3   | -0.09745 | 0.057037 | 0.111878796 |
| ABTB1    | 3q21.3   | 0.097445 | 0.057062 | 0.11191649  |
| PODN     | 1p32.3   | -0.09743 | 0.057107 | 0.111993137 |
| GLYATL1  | 11q12.1  | -0.09742 | 0.057119 | 0.112006425 |
| POGLUT3  | 11q22.3  | -0.09742 | 0.057131 | 0.112018023 |
| NANOGNB  | 12p13.31 | 0.097416 | 0.057136 | 0.112018023 |
| GPR162   | 12p13.31 | -0.09739 | 0.057203 | 0.112137597 |
| WFDC3    | 20q13.12 | -0.09739 | 0.057215 | 0.11215153  |
| ATP13A3  | 3q29     | -0.09735 | 0.057302 | 0.112309605 |
| C16ORF96 | 16p13.3  | -0.09734 | 0.057334 | 0.112361875 |
| LRRC40   | 1p31.1   | 0.097337 | 0.05734  | 0.112363537 |
| IKZF5    | 10q26.13 | -0.09732 | 0.057376 | 0.112421951 |
| TXNRD1   | 12q23.3  | 0.097308 | 0.057415 | 0.112488042 |
| ZNF625   | 19p13.2  | -0.09729 | 0.057464 | 0.112565095 |
| LHX2     | 9q33.3   | 0.097288 | 0.057466 | 0.112565095 |
| TLNRD1   | 15q25.1  | 0.097268 | 0.057518 | 0.11265598  |
| MRPL28   | 16p13.3  | -0.09725 | 0.057559 | 0.112726503 |
| STARD6   | 18q21.2  | 0.097238 | 0.057594 | 0.112783515 |
| ZNF184   | 6p22.1   | 0.097217 | 0.057649 | 0.112879604 |
| MRPL17   | 11p15.4  | -0.09719 | 0.057725 | 0.113017815 |
| CLUHP3   | 16p11.2  | -0.09718 | 0.057749 | 0.113054151 |
| GAB2     | 11q14.1  | 0.097161 | 0.057792 | 0.113127625 |
| NCF1C    | 7q11.23  | 0.097156 | 0.057806 | 0.11314313  |
| KRTAP5-7 | 11q13.4  | -0.09715 | 0.057822 | 0.113163851 |
| COX17    | 3q13.33  | -0.09712 | 0.057889 | 0.113283217 |
| FAM20B   | 1q25.2   | 0.097103 | 0.057942 | 0.113376994 |
| NKG7     | 19q13.41 | 0.097082 | 0.057998 | 0.113474112 |
| PFKFB4   | 3p21.31  | 0.097079 | 0.058005 | 0.11347724  |
| TMTC3    | 12q21.32 | 0.097061 | 0.058053 | 0.113560204 |
| CISD2    | 4q24     | 0.097057 | 0.058064 | 0.113569898 |
| TMEM33   | 4p13     | 0.097032 | 0.058128 | 0.113684664 |
| IKZF4    | 12q13.2  | -0.09702 | 0.058149 | 0.113714598 |
| PKD2L2   | 5q31.2   | 0.096995 | 0.058223 | 0.113848147 |
| UNQ6494  | 9q22.2   | 0.096968 | 0.058295 | 0.113977556 |
| GNPAT    | 1q42.2   | 0.096931 | 0.058391 | 0.114153449 |
| RTN4R    | 22q11.21 | 0.096925 | 0.058406 | 0.114171968 |
| LCE1C    | 1q21.3   | 0.096909 | 0.058448 | 0.114244305 |
| NET1     | 10p15.1  | 0.096904 | 0.058461 | 0.114257378 |
| DNM1     | 9q34.11  | -0.09684 | 0.058634 | 0.114585209 |
| TNFSF4   | 1q25.1   | -0.09682 | 0.058673 | 0.114648973 |
| CKS2     | 9q22.2   | -0.09681 | 0.058702 | 0.11469512  |
| FGA      | 4q31.3   | -0.0968  | 0.058725 | 0.114728447 |
| MRPL51   | 12p13.31 | -0.09679 | 0.058757 | 0.114779735 |
| DRAIC    | 15q23    | -0.09678 | 0.058791 | 0.114825762 |
| ZNF740   | 12q13.13 | -0.09678 | 0.058792 | 0.114825762 |
| ZGLP1    | 19p13.2  | -0.09677 | 0.058815 | 0.114859821 |
| HUWE1    | Xp11.22  | -0.09677 | 0.058823 | 0.114864077 |
| EDA2R    | Xq12     | -0.09675 | 0.058854 | 0.114906663 |
| MAP4K4   | 2q11.2   | -0.09675 | 0.05886  | 0.114906663 |
| FOXN2    | 2p16.3   | -0.09675 | 0.058862 | 0.114906663 |
| COLGALT2 | 1q25.3   | 0.096746 | 0.058876 | 0.11491187  |
| ORAI1    | 12q24.31 | -0.09675 | 0.058876 | 0.11491187  |
| CEP83-DT | 12q22    | -0.09674 | 0.05889  | 0.114917082 |
| APEX1    | 14q11.2  | -0.09674 | 0.05889  | 0.114917082 |

|              |          |          |          |             |
|--------------|----------|----------|----------|-------------|
| DNMT3L       | 21q22.3  | -0.09674 | 0.058902 | 0.114928236 |
| SDC3         | 1p35.2   | -0.09673 | 0.05892  | 0.114952116 |
| MIR1-1HG-AS1 | 20q13.33 | -0.09672 | 0.058953 | 0.115006395 |
| NCF1         | 7q11.23  | 0.096706 | 0.05898  | 0.11504683  |
| SDHAF1       | 19q13.12 | -0.09668 | 0.059054 | 0.115180475 |
| MRPL14       | 6p21.1   | -0.09667 | 0.059088 | 0.115235646 |
| CENPU        | 4q35.1   | 0.096649 | 0.059132 | 0.115292137 |
| DPP10        | 2q14.1   | -0.09665 | 0.059134 | 0.115292137 |
| RPSAP9       | 9q21.13  | -0.09665 | 0.059134 | 0.115292137 |
| DCLRE1C      | 10p13    | -0.09664 | 0.059145 | 0.115296868 |
| C1RL-AS1     | 12p13.31 | -0.09664 | 0.059148 | 0.115296868 |
| RBKS         | 2p23.2   | -0.09664 | 0.05916  | 0.115306383 |
| CYB5R2       | 11p15.4  | 0.096636 | 0.059166 | 0.115306383 |
| SLC7A8       | 14q11.2  | -0.09663 | 0.05917  | 0.115306383 |
| WDR62        | 19q13.12 | 0.096619 | 0.059211 | 0.115374892 |
| TAB1         | 22q13.1  | -0.09661 | 0.059224 | 0.115388036 |
| BRPF3        | 6p21.31  | 0.096592 | 0.059282 | 0.115489835 |
| GPR75        | 2p16.2   | -0.09659 | 0.059292 | 0.115497974 |
| SAPCD1       | 6p21.33  | -0.09657 | 0.059347 | 0.115594884 |
| SMAD9        | 13q13.3  | 0.096534 | 0.059434 | 0.115752345 |
| FBXL22       | 15q22.31 | -0.09652 | 0.059468 | 0.115807732 |
| PCLAF        | 15q22.31 | 0.096515 | 0.059486 | 0.115832024 |
| AIMP2        | 7p22.1   | -0.0965  | 0.059534 | 0.11591301  |
| ZNF425       | 7q36.1   | -0.09648 | 0.059577 | 0.11598567  |
| TPRXL        | 3p25.1   | 0.09647  | 0.059606 | 0.116030264 |
| MAP7D1       | 1p34.3   | -0.09647 | 0.059613 | 0.116032676 |
| HOXB4        | 17q21.32 | 0.096439 | 0.059688 | 0.116168333 |
| MAGED1       | Xp11.22  | -0.09644 | 0.059695 | 0.116170409 |
| CD1C         | 1q23.1   | 0.096425 | 0.059723 | 0.116214195 |
| LINC01119    | 2p21     | -0.09642 | 0.059747 | 0.116248764 |
| LDB2         | 4p15.32  | -0.0964  | 0.059784 | 0.116301281 |
| KCNJ2        | 17q24.3  | 0.096402 | 0.059785 | 0.116301281 |
| IER3         | 6p21.33  | 0.096389 | 0.05982  | 0.116356725 |
| FN3KRP       | 17q25.3  | -0.09639 | 0.059825 | 0.116356725 |
| SPC25        | 2q24.3   | -0.09638 | 0.059848 | 0.11638416  |
| MSANTD3      | 9q31.1   | -0.09638 | 0.059852 | 0.11638416  |
| TTC9         | 14q24.2  | 0.096375 | 0.059857 | 0.11638416  |
| OGG1         | 3p25.3   | -0.09637 | 0.059865 | 0.116388474 |
| SNAP25       | 20p12.2  | -0.09637 | 0.059875 | 0.11639628  |
| SOX21        | 13q32.1  | -0.09637 | 0.059881 | 0.116397152 |
| GLRA4        | Xq22.2   | 0.096341 | 0.059947 | 0.116514018 |
| TCTN2        | 12q24.31 | -0.09631 | 0.060035 | 0.11667367  |
| PATE3        | 11q24.2  | -0.09623 | 0.060257 | 0.117094539 |
| ACAP1        | 17p13.1  | 0.09622  | 0.060272 | 0.117112074 |
| C9ORF40      | 9q21.13  | -0.09622 | 0.06028  | 0.117115284 |
| EBNA1BP2     | 1p34.2   | -0.0962  | 0.060325 | 0.117185458 |
| WWTR1        | 3q25.1   | -0.0962  | 0.060331 | 0.117185458 |
| ZNF496       | 1q44     | -0.0962  | 0.060334 | 0.117185458 |
| P2RY13       | 3q25.1   | 0.096184 | 0.060369 | 0.117243629 |
| ITGB5        | 3q21.2   | -0.09618 | 0.060392 | 0.117276013 |
| PHTF1        | 1p13.2   | -0.09617 | 0.060417 | 0.117314016 |
| GABBR2       | 9q22.33  | -0.09615 | 0.060447 | 0.117359529 |
| KLK15        | 19q13.33 | 0.096131 | 0.060512 | 0.117467401 |
| RGPD3        | 2q12.2   | 0.09613  | 0.060514 | 0.117467401 |
| ARHGEF7      | 13q34    | -0.0961  | 0.060592 | 0.117602924 |
| PDE6D        | 2q37.1   | -0.0961  | 0.060597 | 0.117602924 |
| IFIH1        | 2q24.2   | 0.096097 | 0.060601 | 0.117602924 |
| LINC01554    | 5q15     | 0.096085 | 0.060635 | 0.117656188 |

|           |               |          |          |             |
|-----------|---------------|----------|----------|-------------|
| UXT-AS1   | Xp11.23       | -0.09607 | 0.060682 | 0.117735235 |
| AFF2      | Xq28          | 0.096065 | 0.060687 | 0.117735235 |
| AKT1S1    | 19q13.33      | 0.096049 | 0.060732 | 0.117811649 |
| CELA1     | 12q13.13      | 0.096033 | 0.060774 | 0.1178814   |
| CCDC83    | 11q14.1-q14.2 | 0.096016 | 0.060822 | 0.117961738 |
| LPAR1     | 9q31.3        | 0.095965 | 0.060958 | 0.11820795  |
| PODNL1    | 19p13.12      | -0.09596 | 0.06096  | 0.11820795  |
| ZFP2      | 5q35.3        | 0.09593  | 0.061053 | 0.118375537 |
| ABI3      | 17q21.32      | 0.09592  | 0.061081 | 0.118418935 |
| SNORA40   | 11q21         | -0.09591 | 0.061103 | 0.118450905 |
| PCDHA11   | 5q31.3        | -0.09591 | 0.061112 | 0.118455367 |
| FASLG     | 1q24.3        | 0.095875 | 0.061203 | 0.11862116  |
| HPYR1     | 8q24.22       | 0.095871 | 0.061213 | 0.118628531 |
| DEPDC7    | 11p13         | -0.09586 | 0.061251 | 0.118690907 |
| CD200R1   | 3q13.2        | 0.095854 | 0.061259 | 0.118695973 |
| RASA3     | 13q34         | 0.095842 | 0.061291 | 0.118746111 |
| HIST1H1C  | 6p22.2        | 0.095834 | 0.061314 | 0.118778821 |
| GRIN2B    | 12p13.1       | -0.09583 | 0.06132  | 0.118778849 |
| ZNF318    | 6p21.1        | 0.095817 | 0.061361 | 0.118846531 |
| PRRC2C    | 1q24.3        | 0.095811 | 0.061377 | 0.118865654 |
| FLJ12825  | 12q13.13      | 0.095806 | 0.06139  | 0.118879289 |
| PLAU      | 10q22.2       | -0.0958  | 0.06141  | 0.118907312 |
| FST       | 5q11.2        | -0.09578 | 0.061447 | 0.118967558 |
| ICE2      | 15q22.2       | -0.09577 | 0.06149  | 0.11903978  |
| TENM3     | 4q34.3-q35.1  | -0.09576 | 0.061508 | 0.119062876 |
| MMP2      | 16q12.2       | -0.09574 | 0.061573 | 0.119176911 |
| GJA4      | 1p34.3        | -0.09573 | 0.061591 | 0.119199486 |
| CCR4      | 3p22.3        | 0.095716 | 0.061635 | 0.119274394 |
| ESYT1     | 12q13.2       | 0.095687 | 0.061715 | 0.119417552 |
| SPTBN4    | 19q13.2       | 0.095659 | 0.061791 | 0.119552493 |
| IRF1      | 5q31.1        | 0.095649 | 0.061819 | 0.119594905 |
| FBXO46    | 19q13.32      | -0.09563 | 0.061864 | 0.119671118 |
| APOL4     | 22q12.3       | 0.095622 | 0.061891 | 0.11971087  |
| RWDD4     | 4q35.1        | 0.095611 | 0.061922 | 0.119759759 |
| POLR3K    | 16p13.3       | -0.09558 | 0.061994 | 0.119887426 |
| ZCCHC10   | 5q31.1        | 0.095569 | 0.062036 | 0.119956932 |
| USP3      | 15q22.31      | 0.095555 | 0.062077 | 0.120024184 |
| ARHGEF4   | 2q21.1        | -0.09555 | 0.062095 | 0.120048026 |
| KIAA1147  | 7q34          | -0.09554 | 0.062107 | 0.12006044  |
| CHRNA10   | 11p15.4       | -0.09552 | 0.062172 | 0.120173488 |
| ERP44     | 9q31.1        | 0.095507 | 0.062207 | 0.120230536 |
| MET       | 7q31.2        | -0.09548 | 0.062278 | 0.120355163 |
| FAF2      | 5q35.2        | 0.09547  | 0.062311 | 0.12040655  |
| LOC400710 | 19q13.33      | 0.095463 | 0.062329 | 0.120420952 |
| GRAPL     | 17p11.2       | -0.09546 | 0.06233  | 0.120420952 |
| VWA8      | 13q14.11      | -0.09545 | 0.062354 | 0.120455315 |
| ARL9      | 4q12          | -0.09544 | 0.062391 | 0.120515503 |
| FRMD6     | 14q22.1       | -0.09542 | 0.062453 | 0.120623583 |
| SYCE2     | 19p13.13      | 0.0954   | 0.062502 | 0.120705942 |
| LTA       | 6p21.33       | 0.095397 | 0.06251  | 0.120711083 |
| IPO7      | 11p15.4       | -0.09539 | 0.062521 | 0.120719507 |
| TMEM19    | 12q21.1       | -0.09539 | 0.06253  | 0.120725089 |
| RPA4      | Xq21.33       | -0.09537 | 0.062588 | 0.120819694 |
| ACTA1     | 1q42.13       | -0.09537 | 0.062591 | 0.120819694 |
| RARS      | 5q34          | 0.095345 | 0.062654 | 0.120930247 |
| PCDHGA4   | 5q31.3        | -0.09533 | 0.0627   | 0.121006765 |
| KCNH7     | 2q24.2        | -0.09532 | 0.062712 | 0.12101931  |
| TMEM200C  | 18p11.31      | -0.09532 | 0.06273  | 0.121042844 |



|              |          |          |          |             |
|--------------|----------|----------|----------|-------------|
| CROCC        | 1p36.13  | -0.09529 | 0.062794 | 0.121153939 |
| KIAA0232     | 4p16.1   | 0.095282 | 0.06283  | 0.121211353 |
| TLR8         | Xp22.2   | 0.095259 | 0.062893 | 0.121322095 |
| HIST1H4K     | 6p22.1   | -0.09524 | 0.062939 | 0.121398875 |
| ZDHHHC6      | 10q25.2  | -0.09522 | 0.062989 | 0.121484063 |
| BTBD11       | 12q23.3  | -0.09521 | 0.063034 | 0.121557758 |
| LINC00938    | 12q12    | -0.0952  | 0.063065 | 0.121606085 |
| TUBA4A       | 2q35     | -0.09518 | 0.063119 | 0.121699479 |
| OR13A1       | 10q11.21 | 0.095172 | 0.063133 | 0.121714282 |
| SIPA1L1      | 14q24.2  | 0.095161 | 0.063165 | 0.121763867 |
| EIF3D        | 22q12.3  | -0.09514 | 0.063233 | 0.121883959 |
| OR1J2        | 9q33.2   | -0.09513 | 0.063251 | 0.121906682 |
| PRSS8        | 16p11.2  | 0.095125 | 0.063265 | 0.121920654 |
| LCP2         | 5q35.1   | 0.095118 | 0.063285 | 0.121948262 |
| EMCN         | 4q24     | -0.0951  | 0.063337 | 0.12203723  |
| IRF5         | 7q32.1   | -0.09508 | 0.063393 | 0.122118975 |
| EPPIN        | 20q13.12 | -0.09508 | 0.063393 | 0.122118975 |
| LYL1         | 19p13.13 | -0.09508 | 0.063398 | 0.122118975 |
| WDR61        | 15q25.1  | -0.09507 | 0.063408 | 0.122125765 |
| PATL2        | 15q21.1  | 0.09507  | 0.063419 | 0.122136639 |
| ASB6         | 9q34.11  | -0.09506 | 0.063441 | 0.122167156 |
| DPYSL4       | 10q26.3  | -0.09506 | 0.063454 | 0.122180639 |
| FOXI3        | 2p11.2   | -0.09504 | 0.063513 | 0.122280884 |
| MSX2         | 5q35.2   | -0.09503 | 0.063544 | 0.12233015  |
| EIF4A2       | 3q27.3   | -0.09501 | 0.063578 | 0.122383359 |
| NF1          | 17q11.2  | -0.09498 | 0.063668 | 0.122545739 |
| ZNF749       | 19q13.43 | -0.09495 | 0.063765 | 0.12271992  |
| NCDN         | 1p34.3   | -0.09492 | 0.063831 | 0.122834933 |
| DCP1B        | 12p13.33 | -0.09491 | 0.063854 | 0.122867359 |
| RET          | 10q11.21 | 0.094895 | 0.06391  | 0.122956689 |
| NOTCH2       | 1p12     | 0.094894 | 0.063913 | 0.122956689 |
| PIR          | Xp22.2   | -0.09489 | 0.063933 | 0.122983316 |
| L2HGDH       | 14q21.3  | 0.094882 | 0.063946 | 0.122997133 |
| PRAG1        | 8p23.1   | 0.094877 | 0.063961 | 0.123014446 |
| FBXL18       | 7p22.1   | -0.09487 | 0.063981 | 0.123039918 |
| NDUFA6       | 22q13.2  | 0.094857 | 0.064016 | 0.123095701 |
| ZNF468       | 19q13.41 | 0.09484  | 0.064064 | 0.12317716  |
| LOC90784     | 2p11.2   | 0.094818 | 0.064125 | 0.123283169 |
| LUC7L2       | 7q34     | -0.09481 | 0.064147 | 0.123312187 |
| GOLGA8F      | 15q13.1  | -0.09479 | 0.064209 | 0.123419529 |
| TNMD         | Xq22.1   | -0.09478 | 0.064244 | 0.12346703  |
| NUDT3        | 6p21.31  | -0.09478 | 0.064246 | 0.12346703  |
| STRIP1       | 1p13.3   | -0.09477 | 0.064265 | 0.123491407 |
| PAX2         | 10q24.31 | 0.094766 | 0.064272 | 0.123494317 |
| C21ORF62-AS1 | 21q22.11 | -0.09476 | 0.064283 | 0.123503461 |
| ZBTB25       | 14q23.3  | 0.094747 | 0.064327 | 0.123575085 |
| PWWP3A       | 19p13.3  | -0.09473 | 0.064372 | 0.123650943 |
| STK19        | 6p21.33  | -0.09471 | 0.06443  | 0.123750247 |
| RNF220       | 1p34.1   | -0.0947  | 0.064448 | 0.123773498 |
| SNORA57      | 11q12.3  | -0.0947  | 0.064474 | 0.123810272 |
| TMEM203      | 9q34.3   | -0.09469 | 0.064484 | 0.123817668 |
| PCED1B-AS1   | 12q13.11 | 0.09466  | 0.064574 | 0.123979083 |
| NSUN7        | 4p14     | 0.094633 | 0.064651 | 0.124115073 |
| TAF1         | Xq13.1   | -0.09463 | 0.06466  | 0.124119602 |
| HPS3         | 3q24     | -0.09462 | 0.064679 | 0.124145254 |
| ALCAM        | 3q13.11  | 0.094609 | 0.064717 | 0.124195397 |
| CPQ          | 8q22.1   | -0.09461 | 0.064718 | 0.124195397 |
| TRIM46       | 1q22     | -0.09461 | 0.064726 | 0.124199315 |

|            |              |          |          |             |
|------------|--------------|----------|----------|-------------|
| MYH10      | 17p13.1      | -0.0946  | 0.064733 | 0.124200943 |
| SPDYE8P    | 7q11.23      | -0.0946  | 0.064754 | 0.124228958 |
| SMCR5      | -            | 0.09458  | 0.0648   | 0.124295573 |
| RPS24      | 10q22.3      | -0.09458 | 0.064801 | 0.124295573 |
| EPHA6      | 3q11.2       | -0.09458 | 0.064812 | 0.124304811 |
| QTRT2      | 3q13.31      | -0.09456 | 0.064869 | 0.124401556 |
| ARHGAP45   | 19p13.3      | -0.09454 | 0.064917 | 0.124469878 |
| BCKDHB     | 6q14.1       | 0.094537 | 0.064922 | 0.124469878 |
| CCT2       | 12q15        | -0.09454 | 0.064923 | 0.124469878 |
| CYP4F35P   | 18p11.21     | 0.094531 | 0.064939 | 0.12447897  |
| GPR89A     | 1q21.1       | -0.09453 | 0.06494  | 0.12447897  |
| SIK2       | 11q23.1      | 0.094528 | 0.064948 | 0.124480858 |
| SPRN       | 10q26.3      | -0.09453 | 0.064955 | 0.124480858 |
| PLIN4      | 19p13.3      | -0.09452 | 0.06496  | 0.124480858 |
| OR10A6     | 11p15.4      | -0.09451 | 0.064999 | 0.124538174 |
| ADAMTS12   | 5p13.3-p13.2 | -0.09451 | 0.065002 | 0.124538174 |
| MIR31HG    | 9p21.3       | 0.094505 | 0.065015 | 0.124550537 |
| SNRPD3     | 22q11.23     | -0.0945  | 0.065025 | 0.124559043 |
| FABP6      | 5q33.3       | -0.09447 | 0.06512  | 0.124719823 |
| GNG3       | 11q12.3      | -0.09447 | 0.065123 | 0.124719823 |
| LAMA3      | 18q11.2      | 0.094465 | 0.065128 | 0.124719823 |
| NDFIP1     | 5q31.3       | 0.094462 | 0.065137 | 0.124724382 |
| PKIA       | 8q21.13      | -0.09445 | 0.065174 | 0.124783118 |
| HLA-DPB2   | 6p21.32      | 0.094418 | 0.065263 | 0.124942043 |
| GMPR       | 6p22.3       | 0.094399 | 0.065317 | 0.125033916 |
| ACY3       | 11q13.2      | 0.09439  | 0.065342 | 0.125069162 |
| TSG1       | 6q16.1       | -0.09439 | 0.065348 | 0.125069979 |
| CLEC16A    | 16p13.13     | 0.094374 | 0.065387 | 0.125132594 |
| MAN2A2     | 15q26.1      | -0.09436 | 0.065421 | 0.125166352 |
| MYCN       | 2p24.3       | -0.09436 | 0.065423 | 0.125166352 |
| UCP3       | 11q13.4      | -0.09436 | 0.065424 | 0.125166352 |
| VPS35L     | 16p12.3      | 0.094354 | 0.065445 | 0.125187189 |
| CCDC32     | 15q15.1      | -0.09435 | 0.065453 | 0.125187189 |
| ASPM       | 1q31.3       | 0.094351 | 0.065453 | 0.125187189 |
| RARB       | 3p24.2       | -0.09433 | 0.065519 | 0.125300443 |
| GPATCH8    | 17q21.31     | -0.09432 | 0.06553  | 0.125309748 |
| FUOM       | 10q26.3      | 0.09432  | 0.065545 | 0.125323147 |
| STXBP6     | 14q12        | 0.094317 | 0.065553 | 0.125323147 |
| SPESP1     | 15q23        | -0.09432 | 0.065556 | 0.125323147 |
| HSPA9      | 5q31.2       | 0.094308 | 0.065579 | 0.125355257 |
| SIGMAR1    | 9p13.3       | -0.0943  | 0.065614 | 0.125410677 |
| ZNF835     | 19q13.43     | -0.09429 | 0.065626 | 0.125421661 |
| KCNK2      | 1q41         | -0.09429 | 0.065644 | 0.125438627 |
| AKAP6      | 14q12        | -0.09428 | 0.065647 | 0.125438627 |
| TAF5       | 10q24.33     | 0.09427  | 0.065688 | 0.125503961 |
| ZNF205-AS1 | 16p13.3      | 0.094268 | 0.065694 | 0.125503961 |
| GLS2       | 12q13.3      | -0.09426 | 0.065712 | 0.125525735 |
| CXORF65    | Xq13.1       | -0.09425 | 0.065738 | 0.125562137 |
| NDUFS8     | 11q13.2      | -0.09425 | 0.065743 | 0.125562137 |
| SLMAP      | 3p14.3       | 0.09422  | 0.06583  | 0.125715919 |
| SLC24A1    | 15q22.31     | -0.09421 | 0.065846 | 0.125734733 |
| SF3A2      | 19p13.3      | -0.09421 | 0.065867 | 0.125761843 |
| STARD7     | 2q11.2       | -0.0942  | 0.065894 | 0.125800809 |
| IFT80      | 3q25.33      | -0.09416 | 0.066018 | 0.126023503 |
| ZSCAN5A    | 19q13.43     | 0.094154 | 0.066023 | 0.126023503 |
| CAPZA3     | 12p12.3      | 0.094149 | 0.066035 | 0.126034281 |
| PGAP3      | 17q12        | -0.09415 | 0.066046 | 0.126044584 |
| TERF1      | 8q21.11      | -0.09414 | 0.066056 | 0.126049047 |

|           |          |          |          |             |
|-----------|----------|----------|----------|-------------|
| MCEMP1    | 19p13.2  | -0.09414 | 0.066061 | 0.126049047 |
| CALCR     | 7q21.3   | -0.09414 | 0.066068 | 0.126049428 |
| ZSCAN22   | 19q13.43 | 0.094133 | 0.066081 | 0.12606302  |
| NAPSA     | 19q13.33 | -0.09412 | 0.066114 | 0.12611422  |
| DCT       | 13q32.1  | -0.09412 | 0.066126 | 0.126123603 |
| C1R       | 12p13.31 | -0.09408 | 0.066245 | 0.126339432 |
| CD80      | 3q13.33  | 0.094072 | 0.066259 | 0.126354612 |
| KAT5      | 11q13.1  | -0.09407 | 0.066273 | 0.126367696 |
| ATCAY     | 19p13.3  | -0.09404 | 0.066353 | 0.126498297 |
| PRPF4     | 9q32     | -0.09404 | 0.066354 | 0.126498297 |
| FNDC7     | 1p13.3   | -0.09402 | 0.06642  | 0.126613116 |
| PIAS3     | 1q21.1   | 0.094008 | 0.066445 | 0.126648065 |
| ZNF354B   | 5q35.3   | -0.09397 | 0.06655  | 0.126836279 |
| LINC00922 | 16q21    | -0.09397 | 0.066568 | 0.126857697 |
| CHRNA5    | 15q25.1  | 0.093958 | 0.066589 | 0.126887296 |
| GDE1      | 16p12.3  | -0.0939  | 0.066754 | 0.127177222 |
| RRM2      | 2p25.1   | 0.093901 | 0.066754 | 0.127177222 |
| LDLRAD1   | 1p32.3   | 0.09388  | 0.066817 | 0.127284802 |
| PACSIN1   | 6p21.31  | 0.093844 | 0.066923 | 0.127474895 |
| SPRTN     | 1q42.2   | -0.09383 | 0.066951 | 0.127515437 |
| SPATA7    | 14q31.3  | -0.09381 | 0.067018 | 0.12763153  |
| CSMD1     | 8p23.2   | 0.093805 | 0.067035 | 0.127651022 |
| SIL1      | 5q31.2   | 0.093796 | 0.067063 | 0.127692383 |
| RNF32     | 7q36.3   | -0.09378 | 0.067115 | 0.127778603 |
| AP4S1     | 14q12    | -0.09377 | 0.067137 | 0.127809597 |
| GCLM      | 1p22.1   | 0.093761 | 0.067165 | 0.127850285 |
| ST3GAL5   | 2p11.2   | 0.093738 | 0.067233 | 0.127958112 |
| SYNE2     | 14q23.2  | 0.093735 | 0.067239 | 0.127958112 |
| SENP2     | 3q27.2   | -0.09373 | 0.067242 | 0.127958112 |
| TRIM78P   | 11p15    | -0.09373 | 0.067247 | 0.127958112 |
| ACADL     | 2q34     | 0.093724 | 0.067274 | 0.127997111 |
| CDHR4     | 3p21.31  | 0.093714 | 0.067303 | 0.128039936 |
| DAAM2     | 6p21.2   | -0.09369 | 0.067372 | 0.128159268 |
| CHTF18    | 16p13.3  | -0.09365 | 0.067488 | 0.128367309 |
| DENND2C   | 1p13.2   | -0.09365 | 0.067498 | 0.128374385 |
| SSX2IP    | 1p22.3   | -0.09364 | 0.067508 | 0.128381462 |
| GDPD4     | 11q13.5  | -0.09363 | 0.067552 | 0.128452808 |
| SLC26A7   | 8q21.3   | -0.09362 | 0.06759  | 0.128512053 |
| TMPRSS11D | 4q13.2   | 0.093612 | 0.067602 | 0.128523549 |
| ZFPM2     | 8q23.1   | -0.09361 | 0.067616 | 0.128537498 |
| EFHD2     | 1p36.21  | 0.093601 | 0.067636 | 0.128562666 |
| KLHL40    | 3p22.1   | -0.0936  | 0.067646 | 0.12857078  |
| YIPF3     | 6p21.1   | 0.093589 | 0.06767  | 0.128603367 |
| HAS3      | 16q22.1  | 0.093572 | 0.067719 | 0.128682392 |
| CPT1A     | 11q13.3  | 0.093571 | 0.067724 | 0.128682392 |
| PHKB      | 16q12.1  | 0.093568 | 0.067733 | 0.128682392 |
| SNAP47    | 1q42.13  | -0.09357 | 0.067737 | 0.128682392 |
| YY1AP1    | 1q22     | 0.093559 | 0.067757 | 0.12870879  |
| PITPNM1   | 11q13.2  | 0.093557 | 0.067765 | 0.128711033 |
| PMM2      | 16p13.2  | 0.093552 | 0.067778 | 0.128724192 |
| GSTA2     | 6p12.2   | 0.093537 | 0.067823 | 0.128796202 |
| MAGEB18   | Xp21.3   | -0.09352 | 0.067876 | 0.128875376 |
| SGCG      | 13q12.12 | -0.09352 | 0.067877 | 0.128875376 |
| STOML2    | 9p13.3   | -0.0935  | 0.067925 | 0.128953042 |
| SCPEP1    | 17q22    | -0.0935  | 0.06794  | 0.128971026 |
| PTPRZ1    | 7q31.32  | -0.09348 | 0.068    | 0.129072529 |
| MRPS18A   | 6p21.1   | 0.093455 | 0.068067 | 0.129187191 |
| MTFR2     | 6q23.3   | -0.09344 | 0.068099 | 0.129234246 |

|              |                     |          |          |             |
|--------------|---------------------|----------|----------|-------------|
| SORT1        | 1p13.3 1p21.3-p13.1 | 0.09344  | 0.06811  | 0.129243786 |
| CDH6         | 5p13.3              | -0.09342 | 0.068166 | 0.129338633 |
| PCDHB6       | 5q31.3              | -0.09341 | 0.068186 | 0.129362811 |
| HPCAL4       | 1p34.2              | -0.09336 | 0.06834  | 0.129632052 |
| RIMBP3C      | 22q11.21            | 0.093362 | 0.068341 | 0.129632052 |
| CACNG1       | 17q24.2             | -0.09332 | 0.068476 | 0.129871551 |
| FCF1         | 14q24.3             | -0.09331 | 0.068488 | 0.129871551 |
| CTRB2        | 16q23.1             | -0.09331 | 0.068495 | 0.129871551 |
| C17ORF64     | 17q23.2             | 0.093309 | 0.068498 | 0.129871551 |
| ARHGEF26     | 3q25.2              | 0.093307 | 0.068505 | 0.129871551 |
| CPNE4        | 3q22.1              | 0.093307 | 0.068506 | 0.129871551 |
| MED24        | 17q21.1             | -0.09329 | 0.068559 | 0.129949248 |
| PHF12        | 17q11.2             | -0.09329 | 0.06856  | 0.129949248 |
| ZACN         | 17q25.1             | -0.09328 | 0.068599 | 0.13001235  |
| AVIL         | 12q14.1             | -0.09327 | 0.068622 | 0.130033931 |
| TNRC6C       | 17q25.3             | -0.09327 | 0.068624 | 0.130033931 |
| PHPT1        | 9q34.3              | -0.09325 | 0.068667 | 0.130104341 |
| SF3B1        | 2q33.1              | -0.09324 | 0.068698 | 0.130149222 |
| PSME2        | 14q12               | 0.093237 | 0.068714 | 0.130157459 |
| GTPBP10      | 7q21.13             | -0.09324 | 0.068715 | 0.130157459 |
| ZNF428       | 19q13.31            | -0.09321 | 0.068793 | 0.130293681 |
| ARHGEF5      | 7q35                | 0.093207 | 0.068802 | 0.130298412 |
| FYB2         | 1p32.2              | 0.093196 | 0.068838 | 0.130352601 |
| BCOR         | Xp11.4              | -0.09317 | 0.068925 | 0.130505328 |
| NRCAM        | 7q31.1              | -0.09314 | 0.06899  | 0.130616205 |
| GPRC5C       | 17q25.1             | 0.093134 | 0.069021 | 0.130663665 |
| ATP1A2       | 1q23.2              | -0.09313 | 0.069047 | 0.130699133 |
| RPL15        | 3p24.2              | -0.09311 | 0.069092 | 0.13077206  |
| TMEM120A     | 7q11.23             | -0.09308 | 0.069194 | 0.130954028 |
| SLC35G1      | 10q23.33            | 0.093063 | 0.069235 | 0.131018709 |
| SLC38A1      | 12q13.11            | 0.093047 | 0.069284 | 0.131098102 |
| WNT8A        | 5q31.2              | -0.09303 | 0.069348 | 0.131207594 |
| CNR2         | 1p36.11             | 0.093017 | 0.069374 | 0.131244049 |
| CLCN6        | 1p36.22             | -0.09299 | 0.069449 | 0.131373283 |
| SUCLA2       | 13q14.2             | -0.09299 | 0.069469 | 0.131400109 |
| RPL11        | 1p36.11             | -0.09297 | 0.069504 | 0.131453922 |
| MT1X         | 16q13               | 0.09293  | 0.069634 | 0.13168699  |
| FAM228A      | 2p23.3              | -0.09292 | 0.069666 | 0.131733786 |
| VGF          | 7q22.1              | -0.09288 | 0.069787 | 0.13195099  |
| SNX4         | 3q21.2              | 0.092848 | 0.069883 | 0.132120706 |
| LRRC45       | 17q25.3             | -0.09283 | 0.069936 | 0.132206783 |
| OR5C1        | 9q33.2              | 0.092813 | 0.069989 | 0.132295284 |
| POLN         | 4p16.3              | -0.09281 | 0.070002 | 0.132306638 |
| LOC285593    | 5q35.2              | -0.0928  | 0.070027 | 0.132342586 |
| CRIP2        | 14q32.33            | -0.09279 | 0.070048 | 0.132368885 |
| BORCS8-MEF2B | 19p13.11            | -0.09279 | 0.070056 | 0.132371784 |
| ITGA2B       | 17q21.31            | 0.09278  | 0.070088 | 0.132420689 |
| RADX         | Xq22.3              | -0.09274 | 0.070202 | 0.132622681 |
| CXCL1        | 4q13.3              | 0.092739 | 0.070215 | 0.132634876 |
| SPTB         | 14q23.3             | 0.092733 | 0.070231 | 0.132652015 |
| ZNF22        | 10q11.21            | -0.09271 | 0.070315 | 0.132798938 |
| NID1         | 1q42.3              | -0.0927  | 0.070333 | 0.132819644 |
| ANKMY2       | 7p21.1              | 0.092698 | 0.070339 | 0.132819644 |
| NUTM2F       | 9q22.32             | -0.0927  | 0.070346 | 0.132820546 |
| ZNF658       | 9q21.11             | 0.092689 | 0.070366 | 0.132845303 |
| BTF3         | 5q13.2              | 0.092678 | 0.070398 | 0.132892152 |
| LCN15        | 9q34.3              | -0.0926  | 0.070648 | 0.133351344 |
| LMTK2        | 7q21.3              | 0.092582 | 0.070691 | 0.133420934 |

|              |                     |          |          |             |
|--------------|---------------------|----------|----------|-------------|
| ZNF792       | 19q13.11            | 0.092557 | 0.070769 | 0.133547247 |
| XPNPEP3      | 22q13.2             | -0.09256 | 0.070771 | 0.133547247 |
| SPOCK3       | 4q32.3              | -0.09254 | 0.070807 | 0.133596447 |
| MRPS12       | 19q13.2             | -0.09254 | 0.070811 | 0.133596447 |
| LOC100270746 | 6p22.2              | -0.09254 | 0.070817 | 0.133596447 |
| LINC01142    | 1q24.2              | -0.09253 | 0.070849 | 0.133643486 |
| CFAP43       | 10q25.1             | 0.092522 | 0.070876 | 0.133681909 |
| CATSPERE     | 1q44                | -0.0925  | 0.070952 | 0.133813487 |
| MYH2         | 17p13.1             | -0.09249 | 0.070986 | 0.133863303 |
| MRPL2        | 6p21.1              | -0.09247 | 0.07104  | 0.133953802 |
| INTS13       | 12p11.23            | -0.09247 | 0.071049 | 0.133957375 |
| C22ORF23     | 22q13.1             | -0.09246 | 0.071067 | 0.133979623 |
| STAG3        | 7q22.1              | -0.09245 | 0.071096 | 0.1340218   |
| FAM95B1      | 9p11.2              | 0.092427 | 0.071167 | 0.134141984 |
| TSPO2        | 6p21.1              | 0.092424 | 0.071176 | 0.134147454 |
| CENPA        | 2p23.3              | -0.0924  | 0.071254 | 0.134281798 |
| TTLL13P      | 15q26.1             | 0.092392 | 0.071274 | 0.134306583 |
| CEP131       | 17q25.3             | -0.09238 | 0.071297 | 0.13433761  |
| CLPS         | 6p21.31             | 0.092377 | 0.07132  | 0.134368045 |
| NAT2         | 8p22                | 0.092369 | 0.071346 | 0.13440402  |
| RBM12B-AS1   | 8q22.1              | -0.09236 | 0.071368 | 0.134431915 |
| NCF1B        | 7q11.23             | 0.092359 | 0.071375 | 0.134433397 |
| COL6A4P2     | 3q22.1              | -0.09234 | 0.071424 | 0.134512599 |
| HERC6        | 4q22.1              | 0.092327 | 0.071475 | 0.134596346 |
| RGPD4        | 2q12.3              | 0.092322 | 0.071489 | 0.134609873 |
| MYOM2        | 8p23.3              | -0.09231 | 0.07152  | 0.134655983 |
| EIF1         | 17q21.2             | -0.0923  | 0.071559 | 0.134717108 |
| PTHLH        | 12p11.22            | -0.0923  | 0.071572 | 0.134727547 |
| LANCL1       | 2q34                | -0.09229 | 0.071593 | 0.134754303 |
| P4HA2        | 5q31.1              | 0.092263 | 0.071672 | 0.134890512 |
| LRRTM3       | 10q21.3             | 0.092235 | 0.071757 | 0.135037884 |
| ITIH1        | 3p21.1              | 0.092211 | 0.071832 | 0.135166586 |
| SIGLEC8      | 19q13.41            | 0.092206 | 0.071849 | 0.135185909 |
| OR2A7        | 7q35                | 0.092184 | 0.071917 | 0.135300884 |
| SYCE1        | 10q26.3             | -0.09215 | 0.072009 | 0.135462405 |
| ANKRD44      | 2q33.1              | 0.092139 | 0.072057 | 0.13553904  |
| PECR         | 2q35                | 0.092118 | 0.07212  | 0.135644499 |
| PNPLA1       | 6p21.31             | -0.09209 | 0.072204 | 0.135789678 |
| ACOX3        | 4p16.1              | 0.092076 | 0.07225  | 0.135864306 |
| COL1A1       | 17q21.33            | -0.09207 | 0.07227  | 0.13588646  |
| PPIG         | 2q31.1              | -0.09207 | 0.072277 | 0.13588646  |
| ARHGAP27     | 17q21.31            | 0.092066 | 0.072282 | 0.13588646  |
| STAC3        | 12q13.3             | 0.092058 | 0.072307 | 0.135920286 |
| CDC7         | 1p22.1              | 0.092049 | 0.072336 | 0.135961509 |
| CAMSAP3      | 19p13.2             | -0.09205 | 0.072343 | 0.135961509 |
| RAB6C        | 2q21.1              | -0.09203 | 0.072404 | 0.136064643 |
| NPW          | 16p13.3             | -0.09202 | 0.072419 | 0.136079729 |
| PCDHA8       | 5q31.3              | -0.09201 | 0.07245  | 0.136125556 |
| JUNB         | 19p13.13            | 0.091988 | 0.072526 | 0.136254527 |
| FBXO9        | 6p12.1              | -0.09198 | 0.072564 | 0.13631366  |
| LHX4         | 1q25.2              | 0.091969 | 0.072585 | 0.136335026 |
| ADAMTSL3     | 15q25.2             | -0.09197 | 0.072594 | 0.136335026 |
| IL17RC       | 3p25.3 3p25.3-p24.1 | 0.091965 | 0.072597 | 0.136335026 |
| MYH15        | 3q13.13             | 0.091963 | 0.072603 | 0.136335026 |
| EIF2B5       | 3q27.1              | -0.09195 | 0.072641 | 0.136393613 |
| SYNDIG1      | 20p11.21            | -0.09194 | 0.072685 | 0.136463499 |
| TMX2         | 11q12.1             | 0.091924 | 0.072726 | 0.136528417 |
| CFHR4        | 1q31.3              | -0.0919  | 0.072791 | 0.136637844 |

|                  |               |          |          |             |
|------------------|---------------|----------|----------|-------------|
| IGSF1            | Xq26.1        | -0.0919  | 0.072798 | 0.136637844 |
| ZNF311           | 6p22.1        | -0.09189 | 0.072818 | 0.136661895 |
| PPM1M            | 3p21.2        | -0.09188 | 0.072857 | 0.136723695 |
| GALNT14          | 2p23.1        | -0.09187 | 0.072885 | 0.136751034 |
| BTBD19           | 1p34.1        | -0.09187 | 0.072887 | 0.136751034 |
| RPS6KA3          | Xp22.12       | 0.091871 | 0.072892 | 0.136751034 |
| SNAR-A2          | 19q13.33      | -0.09183 | 0.073019 | 0.13697565  |
| SPRR1B           | 1q21.3        | 0.091815 | 0.073067 | 0.137049325 |
| WLS              | 1p31.3        | -0.09181 | 0.073072 | 0.137049325 |
| PDXDC2P-NPIPB14P | 16q22.1       | 0.09181  | 0.073082 | 0.137055497 |
| CENPB            | 20p13         | -0.09179 | 0.073131 | 0.137133914 |
| BICRA            | 19q13.33      | -0.09177 | 0.073209 | 0.137266909 |
| HTR2B            | 2q37.1        | -0.09176 | 0.073236 | 0.137305414 |
| SLC25A45         | 11q13.1       | 0.091716 | 0.073379 | 0.13755989  |
| FAM66D           | 8p23.1        | 0.091702 | 0.073422 | 0.137628782 |
| TFCP2L1          | 2q14.2        | -0.09168 | 0.073477 | 0.137706863 |
| SOX17            | 8q11.23       | -0.09168 | 0.073478 | 0.137706863 |
| ZNF208           | 19p12         | -0.09168 | 0.073489 | 0.137715238 |
| CACNA2D4         | 12p13.33      | -0.09167 | 0.073517 | 0.137755472 |
| GRIP2            | 3p25.1        | 0.091659 | 0.073558 | 0.137818028 |
| TRIM39           | 6p22.1        | -0.09165 | 0.073591 | 0.137861262 |
| AHDC1            | 1p36.11-p35.3 | 0.091647 | 0.073594 | 0.137861262 |
| URM1             | 9q34.11       | -0.09164 | 0.073613 | 0.137882737 |
| MFAP1            | 15q15.3       | 0.091637 | 0.073627 | 0.137887949 |
| GCGR             | 17q25.3       | 0.091636 | 0.073629 | 0.137887949 |
| HCG26            | 6p21.33       | 0.091629 | 0.073651 | 0.137915347 |
| PRDM12           | 9q34.12       | -0.09162 | 0.073684 | 0.13796476  |
| TLR2             | 4q31.3        | -0.0916  | 0.07373  | 0.138038569 |
| RIOX1            | 14q24.3       | -0.09159 | 0.073777 | 0.138101734 |
| NYNRIN           | 14q12         | -0.09159 | 0.073781 | 0.138101734 |
| LINC00889        | Xq26.3        | -0.09159 | 0.073785 | 0.138101734 |
| NLK              | 17q11.2       | -0.09158 | 0.0738   | 0.138116933 |
| NBR2             | 17q21.31      | -0.09158 | 0.073818 | 0.138138442 |
| FAM71E2          | 19q13.42      | -0.09156 | 0.07387  | 0.138222268 |
| OR2T11           | 1q44          | -0.09154 | 0.073947 | 0.138353185 |
| CSF1R            | 5q32          | 0.091507 | 0.074039 | 0.138506591 |
| FGF11            | 17p13.1       | 0.091506 | 0.074043 | 0.138506591 |
| C6ORF201         | 6p25.2        | 0.09149  | 0.074094 | 0.138588855 |
| CCDC97           | 19q13.2       | -0.09147 | 0.074153 | 0.138684117 |
| OR6V1            | 7q34          | 0.091469 | 0.074158 | 0.138684117 |
| GALNT10          | 5q33.2        | 0.091456 | 0.074201 | 0.138751376 |
| ZNF804B          | 7q21.13       | 0.091445 | 0.074236 | 0.138803009 |
| FRAT2            | 10q24.1       | 0.091433 | 0.074273 | 0.138859813 |
| MPHOSPH8         | 13q12.11      | -0.09142 | 0.074302 | 0.138900613 |
| POU3F1           | 1p34.3        | -0.09142 | 0.07431  | 0.138902543 |
| PDE1C            | 7p14.3        | 0.091412 | 0.07434  | 0.138946036 |
| LRPPRC           | 2p21          | -0.09139 | 0.074405 | 0.139053819 |
| SLC5A5           | 19p13.11      | -0.09136 | 0.074517 | 0.13925027  |
| H2AFB1           | Xq28          | -0.09134 | 0.074556 | 0.139310887 |
| PPP2R2B          | 5q32          | -0.09133 | 0.074594 | 0.13936904  |
| SERPINB9         | 6p25.2        | 0.091325 | 0.074619 | 0.139402026 |
| HIST1H3E         | 6p22.2        | 0.09132  | 0.074634 | 0.139417268 |
| SPRR2C           | 1q21.3        | -0.09131 | 0.074665 | 0.139452893 |
| TMEM117          | 12q12         | -0.09131 | 0.074667 | 0.139452893 |
| ARSB             | 5q14.1        | 0.091307 | 0.074676 | 0.139457867 |
| CHKB-CPT1B       | 22q13.33      | -0.0913  | 0.074713 | 0.139500538 |
| SCML4            | 6q21          | -0.09129 | 0.074719 | 0.139500538 |
| ZFAND5           | 9q21.13       | -0.09129 | 0.074721 | 0.139500538 |

|                |                      |          |          |             |
|----------------|----------------------|----------|----------|-------------|
| KIRREL2        | 19q13.12             | -0.09129 | 0.074727 | 0.139500538 |
| NTRK1          | 1q23.1               | 0.091271 | 0.074789 | 0.139602061 |
| SLC25A38       | 3p22.1               | -0.09127 | 0.074802 | 0.139610905 |
| PNRC1          | 6q15                 | -0.09127 | 0.074807 | 0.139610905 |
| GOS2           | 1q32.2               | -0.09124 | 0.074882 | 0.139738024 |
| FAM157A        | 3q29                 | -0.09123 | 0.074907 | 0.13976343  |
| KLHL25         | 15q25.3              | 0.091234 | 0.07491  | 0.13976343  |
| CSAG3          | Xq28                 | -0.09122 | 0.07494  | 0.139806528 |
| USP1           | 1p31.3               | 0.091218 | 0.074961 | 0.139825718 |
| MSTN           | 2q32.2               | -0.09122 | 0.074964 | 0.139825718 |
| SECISBP2L      | 15q21.1              | 0.091211 | 0.074984 | 0.139848999 |
| CCDC36         | 3p21.31              | -0.0912  | 0.075021 | 0.139900012 |
| C1ORF131       | 1q42.2               | 0.091196 | 0.075029 | 0.139900012 |
| SULF2          | 20q13.12             | -0.0912  | 0.075032 | 0.139900012 |
| CLPTM1         | 19q13.32             | 0.091192 | 0.075044 | 0.139910156 |
| CPZ            | 4p16.1               | -0.09119 | 0.07506  | 0.13992545  |
| FOXD4L5        | 9q21.11              | 0.091166 | 0.075127 | 0.140037914 |
| SNORA59B       | 17p11.2              | -0.09116 | 0.07514  | 0.140044864 |
| IRX1           | 5p15.33              | -0.09116 | 0.075145 | 0.140044864 |
| LINC01144      | 1p34.1               | -0.09112 | 0.075284 | 0.140291378 |
| MAP6D1         | 3q27.1               | -0.0911  | 0.075342 | 0.140387376 |
| CHAMP1         | 13q34                | -0.09108 | 0.075388 | 0.140459537 |
| WDR1           | 4p16.1               | 0.09108  | 0.075402 | 0.140472293 |
| TMEM189-UBE2V1 | 20q13.13             | 0.091078 | 0.07541  | 0.140474901 |
| LINC01139      | 1q43                 | -0.09104 | 0.075529 | 0.140681769 |
| DHRS7B         | 17p11.2              | 0.091022 | 0.075591 | 0.140785858 |
| DICER1-AS1     | 14q32.13             | -0.09101 | 0.075621 | 0.14082839  |
| OR7C1          | 19p13.12             | -0.09101 | 0.07563  | 0.140831587 |
| UEVLD          | 11p15.1              | 0.091001 | 0.075657 | 0.140868186 |
| USH2A          | 1q41                 | 0.090998 | 0.075669 | 0.140877558 |
| SPATA46        | 1q23.3               | 0.090992 | 0.075687 | 0.140897643 |
| HUS1           | 7p12.3               | -0.09095 | 0.07582  | 0.141131885 |
| SCN8A          | 12q13.13             | -0.09092 | 0.075918 | 0.141302869 |
| MMP10          | 11q22.2              | 0.090916 | 0.075933 | 0.141314066 |
| EHMT1          | 9q34.3               | 0.090913 | 0.075941 | 0.141314066 |
| C14ORF132      | 14q32.2              | -0.09091 | 0.075946 | 0.141314066 |
| NUP98          | 11p15.4              | -0.0909  | 0.075978 | 0.141360612 |
| CTNS           | 17p13.2              | 0.090898 | 0.075991 | 0.141372133 |
| AMBN           | 4q13.3               | -0.09089 | 0.076025 | 0.1414231   |
| KIAA1191       | 5q35.2               | 0.090882 | 0.076042 | 0.141440603 |
| DAO            | 12q24.11             | 0.090878 | 0.076057 | 0.141454979 |
| SELL           | 1q24.2               | 0.090873 | 0.076071 | 0.141467553 |
| UBQLN1         | 9q21.32 9q21.2-q21.3 | 0.090852 | 0.07614  | 0.141584273 |
| RAET1K         | 6q25.1               | -0.09085 | 0.076159 | 0.141592903 |
| PHB2           | 12p13.31             | 0.090846 | 0.076161 | 0.141592903 |
| SLC4A7         | 3p24.1               | -0.09084 | 0.076166 | 0.141592903 |
| CASTOR1        | 22q12.2              | 0.090816 | 0.076258 | 0.141740747 |
| ZNF596         | 8p23.3               | 0.090815 | 0.07626  | 0.141740747 |
| SPAG5          | 17q11.2              | 0.090795 | 0.076324 | 0.141845931 |
| RPS14          | 5q33.1               | -0.09079 | 0.076335 | 0.141854883 |
| CDKN2B-AS1     | 9p21.3               | 0.090784 | 0.076362 | 0.141878585 |
| GSTM5          | 1p13.3               | -0.09078 | 0.076362 | 0.141878585 |
| TMEM159        | 16p12.3              | 0.090766 | 0.076421 | 0.141974143 |
| CTRL           | 16q22.1              | -0.09076 | 0.076433 | 0.141984374 |
| DHRS13         | 17q11.2              | 0.090753 | 0.076461 | 0.142015346 |
| KIAA0319L      | 1p34.3               | 0.090752 | 0.076464 | 0.142015346 |
| SFR1           | 10q25.1              | 0.090747 | 0.076483 | 0.142034576 |
| RETREG1        | 5p15.1               | 0.090745 | 0.076489 | 0.142034576 |

|             |              |          |          |             |
|-------------|--------------|----------|----------|-------------|
| CTBP1-DT    | 4p16.3       | 0.090725 | 0.076554 | 0.142142529 |
| RFX7        | 15q21.3      | -0.09072 | 0.076584 | 0.142185378 |
| FBXO33      | 14q21.1      | 0.090696 | 0.076647 | 0.142288204 |
| ROBO2       | 3p12.3       | -0.09069 | 0.076675 | 0.142327144 |
| CFAP65      | 2q35         | 0.090631 | 0.076858 | 0.142647945 |
| STK32C      | 10q26.3      | -0.09063 | 0.076862 | 0.142647945 |
| OR10K1      | 1q23.1       | -0.09062 | 0.076896 | 0.14269788  |
| MESP2       | 15q26.1      | 0.090593 | 0.076985 | 0.142850284 |
| KRTAP4-9    | 17q21.2      | -0.09059 | 0.077006 | 0.142875129 |
| CELSR1      | 22q13.31     | -0.09056 | 0.07709  | 0.143008142 |
| PIKFYVE     | 2q34         | -0.09056 | 0.077092 | 0.143008142 |
| CBX4        | 17q25.3      | -0.09056 | 0.077105 | 0.143019768 |
| ACCS        | 11p11.2      | -0.09055 | 0.077113 | 0.143020922 |
| DNAJC14     | 12q13.2      | -0.09055 | 0.077126 | 0.14303255  |
| KIAA0100    | 17q11.2      | 0.090547 | 0.077135 | 0.143035016 |
| C17ORF67    | 17q22        | -0.09053 | 0.077197 | 0.143137601 |
| CEMIP       | 15q25.1      | -0.09052 | 0.077216 | 0.143159122 |
| MYH3        | 17p13.1      | -0.09051 | 0.077246 | 0.14320152  |
| FBXO5       | 6q25.2       | -0.09051 | 0.077257 | 0.143208604 |
| SCGB3A1     | 5q35.3       | -0.0905  | 0.077303 | 0.143281224 |
| FSCN1       | 7p22.1       | 0.090482 | 0.077348 | 0.143341553 |
| LOC644936   | 5q14.1       | 0.090479 | 0.07736  | 0.143341553 |
| DNAJC25     | 9q31.3       | 0.090478 | 0.07736  | 0.143341553 |
| KRT18       | 12q13.13     | 0.090477 | 0.077365 | 0.143341553 |
| HCFC1R1     | 16p13.3      | -0.09047 | 0.077378 | 0.143351709 |
| PWP2        | 21q22.3      | 0.090471 | 0.077385 | 0.143351709 |
| CACNA2D1    | 7q21.11      | -0.09047 | 0.077391 | 0.143351709 |
| ASAH2       | 10q11.23     | 0.090444 | 0.077474 | 0.143488948 |
| CD300LB     | 17q25.1      | 0.090442 | 0.07748  | 0.143488948 |
| NAPSB       | 19q13.33     | 0.090432 | 0.077514 | 0.143530739 |
| STAM        | 10p12.33     | 0.090431 | 0.077517 | 0.143530739 |
| TMEM106B    | 7p21.3       | -0.09043 | 0.077525 | 0.143531907 |
| ASPG        | 14q32.33     | 0.090418 | 0.077558 | 0.143580732 |
| GYS2        | 12p12.1      | -0.09039 | 0.077636 | 0.143710912 |
| WDR45B      | 17q25.3      | 0.09037  | 0.077718 | 0.143850674 |
| RNF186      | 1p36.13      | 0.090322 | 0.077875 | 0.144126834 |
| TUSC3       | 8p22         | -0.0903  | 0.077953 | 0.144258406 |
| ESYT2       | 7q36.3       | 0.090275 | 0.078031 | 0.144388754 |
| CYLD        | 16q12.1      | 0.090268 | 0.078053 | 0.144411918 |
| PPAN-P2RY11 | 19p13.2      | 0.090267 | 0.078058 | 0.144411918 |
| RAD23A      | 19p13.13     | -0.09026 | 0.078081 | 0.144441048 |
| GUCY2C      | 12p12.3      | 0.090238 | 0.078153 | 0.144560962 |
| CAV3        | 3p25.3       | 0.090234 | 0.078166 | 0.144571619 |
| HSD17B8     | 6p21.32      | -0.09023 | 0.078187 | 0.144597615 |
| TPSD1       | 16p13.3      | 0.090207 | 0.078258 | 0.14471504  |
| RPRD2       | 1q21.2       | 0.090203 | 0.078269 | 0.14472276  |
| PIK3C2A     | 11p15.1      | -0.0902  | 0.078283 | 0.144735818 |
| SNORA50C    | 17q23.3      | -0.0902  | 0.078294 | 0.144741529 |
| STAT5A      | 17q21.2      | 0.090193 | 0.078303 | 0.144746085 |
| REG1CP      | 2p12         | 0.090172 | 0.078374 | 0.144864025 |
| JADE2       | 5q31.1       | 0.090169 | 0.078382 | 0.144864718 |
| HOXB13      | 17q21.32     | 0.090141 | 0.078477 | 0.145027202 |
| POLRMT      | 19p13.3      | -0.09014 | 0.078489 | 0.145035019 |
| TRAPPC13    | 5q12.3       | 0.090109 | 0.078582 | 0.145193708 |
| NCAM2       | 21q21.1      | -0.0901  | 0.078601 | 0.145207271 |
| IL12A       | 3q25.33      | -0.0901  | 0.078605 | 0.145207271 |
| AIM2        | 1q23.1-q23.2 | 0.0901   | 0.078611 | 0.145207271 |
| MAGEB2      | Xp21.2       | -0.09009 | 0.078651 | 0.14526767  |



|           |          |          |          |             |
|-----------|----------|----------|----------|-------------|
| HORMAD2   | 22q12.2  | 0.090084 | 0.078666 | 0.145282876 |
| EHBP1L1   | 11q13.1  | 0.090064 | 0.078732 | 0.145391535 |
| RDH16     | 12q13.3  | 0.090051 | 0.078775 | 0.145457615 |
| MPZL1     | 1q24.2   | 0.090041 | 0.078808 | 0.145497159 |
| SH3TC1    | 4p16.1   | -0.09004 | 0.078811 | 0.145497159 |
| ZFAND3    | 6p21.2   | 0.090029 | 0.078849 | 0.145552722 |
| TXNL4A    | 18q23    | 0.089996 | 0.078961 | 0.145746368 |
| C1ORF35   | 1q42.13  | -0.08999 | 0.078987 | 0.145782078 |
| PRMT5     | 14q11.2  | 0.089983 | 0.079004 | 0.145791075 |
| GTF2A2    | 15q22.2  | 0.089982 | 0.079007 | 0.145791075 |
| FAM162B   | 6q22.1   | -0.08998 | 0.079021 | 0.145803028 |
| TARSL2    | 15q26.3  | 0.089966 | 0.079058 | 0.145858533 |
| ENTHD1    | 22q13.1  | -0.08992 | 0.079206 | 0.146117695 |
| FMO1      | 1q24.3   | -0.08992 | 0.079228 | 0.146145151 |
| HLA-C     | 6p21.33  | 0.089901 | 0.079278 | 0.146213155 |
| THEG      | 19p13.3  | 0.0899   | 0.079279 | 0.146213155 |
| IPPK      | 9q22.31  | 0.089884 | 0.079335 | 0.146302124 |
| DCAF13P3  | 15q21.2  | -0.08988 | 0.079356 | 0.146326734 |
| ZAR1      | 4p11     | -0.08983 | 0.079507 | 0.146592421 |
| KCNA5     | 12p13.32 | -0.08979 | 0.079665 | 0.146869641 |
| FAAP100   | 17q25.3  | -0.08978 | 0.07968  | 0.146884481 |
| ARHGEF9   | Xq11.1   | -0.08976 | 0.079751 | 0.147001939 |
| COX7A2L   | 2p21     | -0.08972 | 0.079882 | 0.147229206 |
| NUB1      | 7q36.1   | -0.08971 | 0.07993  | 0.147304021 |
| ZNF593    | 1p36.11  | -0.08969 | 0.079988 | 0.147397622 |
| NPEPPS    | 17q21.32 | 0.089682 | 0.080016 | 0.147434977 |
| KANK4     | 1p31.3   | -0.08965 | 0.080109 | 0.14759435  |
| CRISP3    | 6p12.3   | 0.089634 | 0.080177 | 0.147705027 |
| IL7R      | 5p13.2   | 0.089629 | 0.080194 | 0.147723461 |
| B9D2      | 19q13.2  | 0.089626 | 0.080203 | 0.14772668  |
| HIST1H3G  | 6p22.2   | -0.08962 | 0.080216 | 0.147737165 |
| GTF3C4    | 9q34.13  | 0.089618 | 0.08023  | 0.147749169 |
| HESX1     | 3p14.3   | -0.08955 | 0.080451 | 0.148142371 |
| ZNF497    | 19q13.43 | 0.089529 | 0.080532 | 0.148274229 |
| FOSB      | 19q13.32 | 0.089527 | 0.080538 | 0.148274229 |
| RPS17     | 15q25.2  | -0.08952 | 0.080571 | 0.148314274 |
| SRFBP1    | 5q23.1   | -0.08952 | 0.080574 | 0.148314274 |
| APOBEC3F  | 22q13.1  | -0.0895  | 0.080631 | 0.148404328 |
| UBA6      | 4q13.2   | 0.089485 | 0.080683 | 0.148481957 |
| TRAPPC5   | 19p13.2  | -0.08948 | 0.080689 | 0.148481957 |
| NPIP5     | 16p12.2  | -0.08948 | 0.080695 | 0.148481957 |
| LBR       | 1q42.12  | -0.08947 | 0.08074  | 0.148551868 |
| LINC00452 | 13q34    | -0.08946 | 0.080751 | 0.148557322 |
| CDR1      | Xq27.1   | -0.08945 | 0.080793 | 0.148620663 |
| CRYZ      | 1p31.1   | 0.089411 | 0.080934 | 0.148867033 |
| XAF1      | 17p13.1  | 0.089405 | 0.080955 | 0.148891166 |
| LOC93622  | 4p16.1   | 0.089378 | 0.081046 | 0.149044992 |
| ITGA7     | 12q13.2  | -0.08937 | 0.081071 | 0.149073031 |
| NBPF14    | 1q21.2   | -0.08937 | 0.081076 | 0.149073031 |
| TSC22D3   | Xq22.3   | -0.08936 | 0.081123 | 0.149145858 |
| FAM122A   | 9q21.11  | 0.089348 | 0.081148 | 0.149178109 |
| LOC641367 | 19p12    | -0.08934 | 0.08116  | 0.149187405 |
| FLOT2     | 17q11.2  | -0.08933 | 0.081213 | 0.149270959 |
| NFAM1     | 22q13.2  | 0.089327 | 0.081221 | 0.149270959 |
| ERH       | 14q24.1  | -0.08932 | 0.081246 | 0.149304615 |
| ATP5MC2   | 12q13.13 | -0.08931 | 0.081273 | 0.14933963  |
| ABRAXAS1  | 4q21.23  | -0.0893  | 0.081315 | 0.14940308  |
| HNRNPD    | 4q21.22  | -0.08926 | 0.081435 | 0.149601852 |

|          |             |          |          |             |
|----------|-------------|----------|----------|-------------|
| RIC1     | 9p24.1      | 0.089264 | 0.081438 | 0.149601852 |
| VDAC3    | 8p11.21     | 0.089259 | 0.081455 | 0.149619301 |
| PPP1R16A | 8q24.3      | -0.08925 | 0.081473 | 0.149638107 |
| TNF      | 6p21.33     | -0.08922 | 0.081595 | 0.149848762 |
| NPY5R    | 4q32.2      | 0.089212 | 0.081615 | 0.149863656 |
| PABPN1L  | 16q24.3     | 0.089211 | 0.081618 | 0.149863656 |
| PPP3CB   | 10q22.2     | 0.089199 | 0.08166  | 0.149927705 |
| NPR2     | 9p13.3      | -0.08919 | 0.081683 | 0.149956043 |
| RBM5     | 3p21.31     | -0.08919 | 0.081694 | 0.149961305 |
| PPP6R3   | 11q13.2     | -0.08918 | 0.081721 | 0.149997796 |
| HIVEP1   | 6p24.1      | 0.089164 | 0.08178  | 0.150083024 |
| COL5A1   | 9q34.3      | -0.08916 | 0.081782 | 0.150083024 |
| RNF126   | 19p13.3     | 0.089148 | 0.081836 | 0.150167099 |
| CCNF     | 16p13.3     | 0.089143 | 0.081851 | 0.150180522 |
| PTPN5    | 11p15.1     | -0.08912 | 0.081919 | 0.150292411 |
| TRIL     | 7p14.3      | -0.0891  | 0.081991 | 0.150411375 |
| TOP3B    | 22q11.22    | -0.0891  | 0.082016 | 0.150442505 |
| FAF1     | 1p32.3      | -0.08907 | 0.082102 | 0.150586653 |
| ASPA     | 17p13.2     | 0.089066 | 0.082116 | 0.150598438 |
| SRF      | 6p21.1      | -0.08905 | 0.082181 | 0.150703477 |
| CILP     | 15q22.31    | -0.08904 | 0.082218 | 0.150757795 |
| GJD2     | 15q14       | -0.08903 | 0.08224  | 0.150783919 |
| SPDYE4   | 17p13.1     | 0.089027 | 0.082252 | 0.150793373 |
| ICAM5    | 19p13.2     | 0.089009 | 0.082313 | 0.150891398 |
| APOA2    | 1q23.3      | -0.089   | 0.082337 | 0.150921158 |
| ADGRG5   | 16q21       | 0.088999 | 0.08235  | 0.150931534 |
| MACF1    | 1p34.3      | -0.08898 | 0.082401 | 0.151010511 |
| CXORF38  | Xp11.4      | -0.08896 | 0.082466 | 0.15111166  |
| CAMK2N2  | 3q27.1      | 0.088963 | 0.082474 | 0.15111166  |
| SLC2A6   | 9q34.2      | -0.08891 | 0.08267  | 0.151462303 |
| TAOK2    | 16p11.2     | 0.088891 | 0.082724 | 0.151546968 |
| CREM     | 10p11.21    | -0.08888 | 0.082764 | 0.151607024 |
| FAM86JP  | 3q21.2      | -0.08884 | 0.082884 | 0.151812324 |
| STON2    | 14q31.1     | -0.08882 | 0.082953 | 0.151906382 |
| ATP6V1G2 | 6p21.33     | -0.08882 | 0.082955 | 0.151906382 |
| GIMAP5   | 7q36.1      | 0.088823 | 0.082958 | 0.151906382 |
| LIPI     | 21q11.2     | -0.08882 | 0.082977 | 0.151926807 |
| ZNF83    | 19q13.41    | -0.08881 | 0.083004 | 0.151962255 |
| PTPRS    | 19p13.3     | -0.08878 | 0.083109 | 0.152140462 |
| TBL3     | 16p13.3     | -0.08877 | 0.083132 | 0.152163446 |
| TMEM236  | 10p12.33    | 0.088772 | 0.083136 | 0.152163446 |
| ATP5IF1  | 1p35.3      | 0.088765 | 0.083161 | 0.152194849 |
| BMERB1   | 16p13.11    | -0.08875 | 0.083218 | 0.152285322 |
| HLA-DQB2 | 6p21.32     | 0.088743 | 0.08324  | 0.1523105   |
| EBP      | Xp11.23     | -0.08869 | 0.08343  | 0.152645232 |
| ZNF846   | 19p13.2     | -0.08868 | 0.083458 | 0.152682215 |
| ST20-AS1 | 15q25.1     | -0.08866 | 0.083512 | 0.152767401 |
| WBP1L    | 10q24.32    | 0.088632 | 0.083627 | 0.152955802 |
| SRGAP1   | 12q14.2     | 0.088631 | 0.08363  | 0.152955802 |
| REG3G    | 2p12        | 0.088607 | 0.083714 | 0.153095013 |
| EFR3B    | 2p23.3      | -0.0886  | 0.083722 | 0.153096093 |
| SNORA63  | 3q27.3      | -0.0886  | 0.083738 | 0.153109869 |
| GDF6     | 8q22.1      | -0.08859 | 0.083759 | 0.153134292 |
| TTC21A   | 3p22.2      | -0.08858 | 0.083821 | 0.153233538 |
| TRAPPC10 | 21q22.3     | 0.088536 | 0.083962 | 0.153477841 |
| SF3B3    | 16q22.1     | -0.08853 | 0.083986 | 0.153496822 |
| GK2      | 4q21.21     | 0.088529 | 0.083988 | 0.153496822 |
| FDCSP    | 4q13.3 4q13 | 0.088518 | 0.084026 | 0.153552656 |

|            |                 |          |          |             |
|------------|-----------------|----------|----------|-------------|
| CHP2       | 16p12.2         | 0.088497 | 0.084098 | 0.153671    |
| ERBIN      | 5q12.3          | 0.088492 | 0.084116 | 0.153689872 |
| NPFF       | 12q13.13        | -0.08849 | 0.084128 | 0.153696623 |
| CYB5R4     | 6q14.2          | 0.08848  | 0.084159 | 0.1537407   |
| LINGO2     | 9p21.2-p21.1    | -0.08847 | 0.084178 | 0.15376078  |
| NEAT1      | 11q13.1         | 0.088458 | 0.084237 | 0.153853842 |
| TBX20      | 7p14.2          | -0.08845 | 0.084273 | 0.153905892 |
| ACAN       | 15q26.1         | -0.08843 | 0.084329 | 0.153994759 |
| C12ORF4    | 12p13.32        | 0.088412 | 0.084397 | 0.154105456 |
| GUCA1A     | 6p21.1          | -0.08837 | 0.084543 | 0.154336375 |
| TMEM50A    | 1p36.11         | 0.08837  | 0.084547 | 0.154336375 |
| LOC650293  | 4p16.1          | -0.08837 | 0.08455  | 0.154336375 |
| NTN1       | 17p13.1         | 0.088368 | 0.084555 | 0.154336375 |
| MEIOC      | 17q21.31        | -0.08834 | 0.084658 | 0.154511154 |
| HS3ST3B1   | 17p12           | 0.088336 | 0.084669 | 0.15451603  |
| PROSER3    | 19q13.12        | 0.08833  | 0.084687 | 0.154535786 |
| C4ORF3     | 4q26            | 0.08832  | 0.084723 | 0.154573769 |
| ADH1B      | 4q23            | 0.08832  | 0.084723 | 0.154573769 |
| CALCR1     | 2q32.1          | -0.08831 | 0.084748 | 0.154604707 |
| MRPL20-AS1 | 1p36.33         | -0.08831 | 0.084767 | 0.15462537  |
| SMG1P3     | 16p12.2         | -0.0883  | 0.084797 | 0.154665497 |
| ADRA1B     | 5q33.3          | -0.08829 | 0.084815 | 0.154681813 |
| ABCG1      | 21q22.3         | 0.088292 | 0.084821 | 0.154681813 |
| TEAD3      | 6p21.31         | -0.08829 | 0.084842 | 0.154705267 |
| COL12A1    | 6q13-q14.1      | -0.08827 | 0.084884 | 0.154767663 |
| SPIC       | 12q23.2         | 0.088265 | 0.084918 | 0.154815542 |
| COP1       | 1q25.1-q25.2    | -0.08826 | 0.084928 | 0.154820158 |
| DSC3       | 18q12.1         | -0.08824 | 0.085005 | 0.154936687 |
| ADCK2      | 7q34            | -0.08824 | 0.085007 | 0.154936687 |
| ARL4C      | 2q37.1          | -0.08822 | 0.085075 | 0.155045107 |
| MARK3      | 14q32.32-q32.33 | 0.088205 | 0.08513  | 0.155132685 |
| LTK        | 15q15.1         | 0.088203 | 0.08514  | 0.155133715 |
| F8         | Xq28            | -0.0882  | 0.085147 | 0.155133715 |
| ZBTB20     | 3q13.31         | -0.08815 | 0.085314 | 0.155424156 |
| RNF151     | 16p13.3         | -0.08813 | 0.085388 | 0.155544822 |
| APBA2      | 15q13.1         | -0.08812 | 0.085421 | 0.155590692 |
| TMEM82     | 1p36.21         | 0.088112 | 0.085463 | 0.15563902  |
| RUFY4      | 2q35            | -0.08811 | 0.085468 | 0.15563902  |
| VIPAS39    | 14q24.3         | -0.08811 | 0.085471 | 0.15563902  |
| DOLK       | 9q34.11         | -0.0881  | 0.085489 | 0.155658392 |
| SNORA12    | 10q24.31        | -0.0881  | 0.085506 | 0.155675078 |
| POP1       | 8q22.2          | -0.0881  | 0.085517 | 0.155681776 |
| OR6B1      | 7q35            | 0.088094 | 0.085527 | 0.155685372 |
| KIAA1143   | 3p21.31         | -0.08807 | 0.085606 | 0.155815571 |
| TLE5       | 19p13.3         | 0.088062 | 0.08564  | 0.155862925 |
| NSL1       | 1q32.3          | -0.08802 | 0.085775 | 0.156094989 |
| ADAMTS3    | 4q13.3          | -0.08798 | 0.085942 | 0.156373502 |
| MYOC       | 1q24.3          | -0.08798 | 0.085944 | 0.156373502 |
| CLDN3      | 7q11.23         | -0.08797 | 0.085978 | 0.156420873 |
| GAGE1      | Xp11.23         | -0.08796 | 0.086019 | 0.15648071  |
| PHACTR2    | 6q24.2          | -0.08794 | 0.086094 | 0.156602862 |
| HTR7       | 10q23.31        | 0.087923 | 0.086139 | 0.156670336 |
| PDXK       | 21q22.3         | 0.087916 | 0.086162 | 0.15669794  |
| PON2       | 7q21.3          | -0.0879  | 0.086216 | 0.156782013 |
| OR14A16    | 1q44            | 0.087892 | 0.08625  | 0.156830615 |
| STMN1      | 1p36.11         | -0.08783 | 0.086461 | 0.157199252 |
| SLFN5      | 17q12           | 0.087825 | 0.08649  | 0.157238474 |
| CEACAM4    | 19q13.2         | 0.087821 | 0.086503 | 0.157247959 |

|              |                 |          |          |             |
|--------------|-----------------|----------|----------|-------------|
| TMEM114      | 16p13.2         | -0.0878  | 0.086578 | 0.157369161 |
| PCDHGA8      | 5q31.3          | -0.08779 | 0.086612 | 0.157417182 |
| GSTA3        | 6p12.2          | -0.08778 | 0.086654 | 0.157479631 |
| ZNF131       | 5p12            | -0.08776 | 0.086715 | 0.157575664 |
| GH1          | 17q23.3         | 0.08776  | 0.086725 | 0.15758019  |
| SIGLEC1      | 20p13           | 0.087717 | 0.086879 | 0.157844794 |
| PNRC2        | 1p36.11         | -0.08771 | 0.086888 | 0.15784742  |
| DNAH12       | 3p14.3          | -0.08771 | 0.086899 | 0.157852423 |
| MICOS13      | 19p13.3         | -0.0877  | 0.086932 | 0.15789854  |
| IGHMBP2      | 11q13.3         | -0.0877  | 0.086956 | 0.157921484 |
| BRAP         | 12q24.12        | -0.08769 | 0.086961 | 0.157921484 |
| GPAT2        | 2q11.2          | 0.087689 | 0.086978 | 0.157929571 |
| FLVCR1       | 1q32.3          | -0.08769 | 0.086981 | 0.157929571 |
| CPNE8        | 12q12           | -0.08768 | 0.087013 | 0.15797317  |
| HYOU1        | 11q23.3         | 0.087671 | 0.087045 | 0.158018191 |
| TMEM268      | 9q32            | 0.087661 | 0.087081 | 0.158068875 |
| DDX39A       | 19p13.12        | -0.08765 | 0.087119 | 0.158123814 |
| RELN         | 7q22.1          | -0.08762 | 0.087218 | 0.158277589 |
| NCAPG        | 4p15.31         | 0.087623 | 0.08722  | 0.158277589 |
| BPHL         | 6p25.2          | -0.0876  | 0.087287 | 0.158384952 |
| TTC39C       | 18q11.2         | -0.0876  | 0.087317 | 0.158417126 |
| TRIM41       | 5q35.3          | 0.087595 | 0.08732  | 0.158417126 |
| FOXE3        | 1p33            | -0.08759 | 0.087352 | 0.158459465 |
| DUSP26       | 8p12            | -0.08758 | 0.087365 | 0.158468934 |
| RAB9BP1      | 5q21.2-q21.3    | -0.08757 | 0.087395 | 0.158508768 |
| OR7C2        | 19p13.12        | 0.087567 | 0.087423 | 0.158529915 |
| WDR88        | 19q13.11        | -0.08756 | 0.087429 | 0.158529915 |
| NNAT         | 20q11.23        | -0.08756 | 0.08743  | 0.158529915 |
| LPAR4        | Xq21.1          | -0.08755 | 0.087498 | 0.158638823 |
| FBXO10       | 9p13.2          | -0.08754 | 0.087536 | 0.158693262 |
| CAMKK1       | 17p13.2         | 0.087526 | 0.08757  | 0.158741275 |
| JCAD         | 10p11.23        | -0.08752 | 0.087606 | 0.158790717 |
| NUSAP1       | 15q15.1         | 0.087511 | 0.087626 | 0.158813221 |
| SNX11        | 17q21.32        | -0.0875  | 0.087678 | 0.158891235 |
| CYP21A2      | 6p21.33         | -0.08749 | 0.087685 | 0.158891235 |
| NRROS        | 3q29            | -0.08748 | 0.087729 | 0.158957375 |
| HDAC9        | 7p21.1          | -0.08747 | 0.087772 | 0.159018038 |
| HRCT1        | 9p13.3          | 0.087469 | 0.087779 | 0.159018038 |
| LEKR1        | 3q25.31         | -0.08746 | 0.087812 | 0.159063254 |
| HGC6.3       | 6q27            | -0.08744 | 0.087883 | 0.159179031 |
| COX5B        | 2q11.2          | -0.08743 | 0.087905 | 0.159203536 |
| CDH12        | 5p14.3          | -0.08742 | 0.087949 | 0.159268139 |
| FAM216B      | 13q14.11        | 0.087405 | 0.088012 | 0.159365022 |
| ZSWIM8       | 10q22.2         | 0.087403 | 0.088018 | 0.159365022 |
| YIPF1        | 1p32.3          | 0.087389 | 0.088068 | 0.159441638 |
| FABP12       | 8q21.13         | 0.08738  | 0.088101 | 0.159479489 |
| SMPDL3B      | 1p35.3          | 0.087379 | 0.088108 | 0.159479489 |
| SLC16A10     | 6q21            | -0.08738 | 0.088113 | 0.159479489 |
| PHOSPHO1     | 17q21.32        | -0.08736 | 0.088171 | 0.159569294 |
| CITED4       | 1p34.2 1p35-p34 | -0.08735 | 0.088226 | 0.159654188 |
| ENHO         | 9p13.3          | 0.087338 | 0.088256 | 0.159694442 |
| SLC26A1      | 4p16.3          | -0.08733 | 0.088274 | 0.159713629 |
| TTC17        | 11p12-p11.2     | -0.08729 | 0.088414 | 0.159951443 |
| FOXP4        | 6p21.1          | -0.08728 | 0.088454 | 0.159997209 |
| LOC100134868 | 20p11.1         | -0.08728 | 0.088455 | 0.159997209 |
| SPRR4        | 1q21.3          | -0.08726 | 0.088553 | 0.160159174 |
| SYT14P1      | 4q13.2          | -0.08725 | 0.088573 | 0.16017431  |
| ZCCHC8       | 12q24.31        | 0.087249 | 0.088583 | 0.16017431  |

|              |              |          |          |             |
|--------------|--------------|----------|----------|-------------|
| WDR47        | 1p13.3       | 0.087248 | 0.088585 | 0.16017431  |
| GABARAPL3    | 15q26.1      | -0.08723 | 0.088668 | 0.160310603 |
| ABRA         | 8q23.1       | -0.08721 | 0.088715 | 0.160381103 |
| FRG1         | 4q35.2       | -0.0872  | 0.088766 | 0.160458    |
| FOXI1        | 5q35.1       | 0.087193 | 0.088787 | 0.160481836 |
| DNAL1        | 14q24.3      | 0.087189 | 0.088802 | 0.16049479  |
| EFEMP1       | 2p16.1       | -0.08714 | 0.088973 | 0.160789313 |
| RMND5B       | 5q35.3       | 0.08713  | 0.089018 | 0.160854796 |
| UNG          | 12q24.11     | -0.08713 | 0.089026 | 0.160854796 |
| POMT2        | 14q24.3      | 0.087118 | 0.089063 | 0.160907599 |
| UBE2W        | 8q21.11      | -0.08711 | 0.089099 | 0.160958982 |
| BTN2A2       | 6p22.2       | -0.0871  | 0.08912  | 0.160982402 |
| OR10A3       | 11p15.4      | 0.087098 | 0.089139 | 0.161001208 |
| CRIM1        | 2p22.2       | 0.087078 | 0.089212 | 0.16110728  |
| GAS5         | 1q25.1       | -0.08708 | 0.089214 | 0.16110728  |
| SLC6A17      | 1p13.3       | -0.08707 | 0.089235 | 0.161131603 |
| RPS27        | 1q21.3       | -0.08706 | 0.089263 | 0.161167127 |
| SIGLEC16     | 19q13.33     | 0.087061 | 0.089274 | 0.161173733 |
| LINC00957    | 7p13         | 0.08705  | 0.089315 | 0.16123273  |
| ETFRF1       | 12p12.1      | 0.087014 | 0.089447 | 0.161456452 |
| QKI          | 6q26         | -0.08701 | 0.089458 | 0.161462006 |
| MLIP         | 6p12.1       | 0.087007 | 0.089474 | 0.161476326 |
| UNC13D       | 17q25.1      | 0.086982 | 0.089566 | 0.161626654 |
| TP73-AS1     | 1p36.32      | -0.08698 | 0.089574 | 0.161626654 |
| ATP5MC3      | 2q31.1       | 0.086974 | 0.089595 | 0.161650898 |
| LIN7C        | 11p14.1      | 0.086945 | 0.089702 | 0.161829019 |
| MDK          | 11p11.2      | 0.086935 | 0.089738 | 0.161875017 |
| GAGE4        | Xp11.4-p11.2 | -0.08693 | 0.089744 | 0.161875017 |
| MT2A         | 16q13        | 0.086925 | 0.089775 | 0.161916218 |
| MTHFD2L      | 4q13.3       | -0.08692 | 0.089785 | 0.16191657  |
| FBP2         | 9q22.32      | -0.08692 | 0.089791 | 0.16191657  |
| CCDC134      | 22q13.2      | 0.086882 | 0.089936 | 0.162163326 |
| FRG2B        | 10q26.3      | -0.08688 | 0.089957 | 0.162186424 |
| EHD1         | 11q13.1      | 0.086857 | 0.090029 | 0.162301308 |
| PGAP1        | 2q33.1       | 0.086844 | 0.090076 | 0.162371775 |
| HACD4        | 9p21.3       | -0.0868  | 0.090226 | 0.162625378 |
| SPTAN1       | 9q34.11      | 0.086802 | 0.090233 | 0.162625378 |
| ITFG1        | 16q12.1      | 0.086799 | 0.090243 | 0.162629516 |
| PRCC         | 1q23.1       | 0.086797 | 0.090252 | 0.162630766 |
| LINC00115    | 1p36.33      | -0.08675 | 0.090423 | 0.162923911 |
| BRD7P3       | 6q22.31      | 0.086731 | 0.090499 | 0.163046588 |
| BRMS1L       | 14q13.2      | -0.08672 | 0.090526 | 0.163069387 |
| FILIP1       | 6q14.1       | -0.08672 | 0.090528 | 0.163069387 |
| IFT81        | 12q24.11     | -0.08671 | 0.090561 | 0.16310049  |
| PPP1R42      | 8q13.1       | 0.086714 | 0.090562 | 0.16310049  |
| CA4          | 17q23.1      | 0.086708 | 0.090583 | 0.163123543 |
| RPRD1A       | 18q12.2      | 0.086706 | 0.090592 | 0.163125768 |
| FXYD5        | 19q13.12     | -0.08665 | 0.090817 | 0.16350325  |
| PRAMEF10     | 1p36.21      | 0.086645 | 0.090818 | 0.16350325  |
| ZFYVE27      | 10q24.2      | 0.086589 | 0.09103  | 0.163871184 |
| PAWR         | 12q21.2      | 0.086552 | 0.091167 | 0.164102057 |
| HPS6         | 10q24.32     | 0.086543 | 0.091202 | 0.164151295 |
| LINC00518    | 6p24.3       | -0.08653 | 0.091234 | 0.164192487 |
| PKHD1        | 6p12.3-p12.2 | -0.08653 | 0.091259 | 0.164218838 |
| ZNF486       | 19p12        | -0.08653 | 0.091265 | 0.164218838 |
| GNLV         | 2p11.2       | 0.086524 | 0.091273 | 0.164218838 |
| CHIAP2       | 1p13.2       | 0.08651  | 0.091325 | 0.164298368 |
| LOC100272216 | -            | 0.086502 | 0.091356 | 0.164338949 |

|           |                |          |          |             |
|-----------|----------------|----------|----------|-------------|
| HCRT1     | 1p35.2         | -0.08648 | 0.091432 | 0.164461237 |
| C20ORF194 | 20p13          | -0.08647 | 0.091473 | 0.164520834 |
| C1QTNF9B  | 13q12.12       | -0.08641 | 0.091697 | 0.1649082   |
| RSPRY1    | 16q13          | 0.0864   | 0.091739 | 0.164969614 |
| ZKSCAN8   | 6p22.1         | -0.0864  | 0.091755 | 0.164982542 |
| TLK1      | 2q31.1         | -0.08639 | 0.091791 | 0.165025925 |
| HIST1H2BD | 6p22.2         | -0.08639 | 0.091796 | 0.165025925 |
| BSPRY     | 9q32           | 0.086379 | 0.091817 | 0.165050541 |
| BOLL      | 2q33.1         | -0.08637 | 0.091852 | 0.165098106 |
| GINS2     | 16q24.1        | -0.08637 | 0.091865 | 0.165105627 |
| GRASP     | 12q13.13       | -0.08636 | 0.091906 | 0.165158668 |
| EBF3      | 10q26.3        | -0.08635 | 0.091911 | 0.165158668 |
| NELL1     | 11p15.1        | 0.086352 | 0.091919 | 0.165158668 |
| OCSTAMP   | 20q13.12       | -0.08633 | 0.092009 | 0.165306222 |
| ILVBL     | 19p13.12       | -0.08632 | 0.092023 | 0.165316502 |
| PIP5K1C   | 19p13.3        | 0.086319 | 0.092047 | 0.165332173 |
| HDHD3     | 9q32           | 0.086318 | 0.092048 | 0.165332173 |
| BLCAP     | 20q11.23       | -0.08628 | 0.092186 | 0.165564588 |
| FHAD1     | 1p36.21        | 0.086278 | 0.092201 | 0.165576059 |
| TBL2      | 7q11.23        | -0.08627 | 0.092241 | 0.165632982 |
| CCDC148   | 2q24.1         | 0.086253 | 0.092296 | 0.165716628 |
| PSMB5     | 14q11.2        | -0.08624 | 0.092348 | 0.165786052 |
| VIP       | 6q25.2         | -0.08624 | 0.092351 | 0.165786052 |
| DNAH1     | 3p21.1         | -0.0862  | 0.092506 | 0.166049866 |
| TKT       | 3p21.1         | -0.08619 | 0.092529 | 0.166076064 |
| FAM66E    | 8p23.1         | -0.08619 | 0.092543 | 0.166086432 |
| SUGT1P1   | 9p13.3         | -0.08617 | 0.092597 | 0.166168749 |
| SEC14L2   | 22q12.2        | 0.086166 | 0.092625 | 0.166203121 |
| FAM71F2   | 7q32.1         | -0.08615 | 0.092673 | 0.166275419 |
| VWA2      | 10q25.3        | -0.08615 | 0.092684 | 0.166279054 |
| DDX24     | 14q32.12       | 0.086139 | 0.092729 | 0.16634494  |
| TRMT2A    | 22q11.21       | -0.08608 | 0.092956 | 0.166737322 |
| SNX6      | 14q13.1        | 0.086071 | 0.092985 | 0.166775375 |
| SUPT6H    | 17q11.2        | -0.08607 | 0.093001 | 0.166788408 |
| FBN1      | 15q21.1        | -0.08606 | 0.093035 | 0.166835304 |
| PRKCSH    | 19p13.2        | -0.08604 | 0.093086 | 0.166911666 |
| CDC37L1   | 9p24.1         | 0.086031 | 0.093141 | 0.166995421 |
| GIPC3     | 19p13.3        | -0.08603 | 0.093152 | 0.166999626 |
| C10ORF131 | 10q24.1        | -0.08599 | 0.093301 | 0.167252458 |
| SLC17A3   | 6p22.2         | -0.08598 | 0.093351 | 0.167327298 |
| CROCCP2   | 1p36.13        | -0.08596 | 0.093405 | 0.167408985 |
| OTP       | 5q14.1         | 0.085945 | 0.093467 | 0.167503832 |
| PIGL      | 17p11.2        | -0.08591 | 0.093619 | 0.167752564 |
| FGFR1     | 8p11.23        | -0.0859  | 0.093622 | 0.167752564 |
| EIF2AK4   | 15q15.1        | -0.08585 | 0.093839 | 0.168126754 |
| GPR12     | 13q12.13       | 0.085837 | 0.093883 | 0.168189573 |
| MISP3     | 19p13.12       | 0.085792 | 0.094054 | 0.168480593 |
| SPEN      | 1p36.21-p36.13 | 0.085782 | 0.094093 | 0.168535261 |
| HEATR3    | 16q12.1        | -0.08578 | 0.094104 | 0.168540964 |
| DESI2     | 1q44           | -0.08577 | 0.094152 | 0.168611976 |
| SSR2      | 1q22           | 0.085764 | 0.094163 | 0.168616197 |
| LRCH4     | 7q22.1         | 0.085736 | 0.094269 | 0.168791206 |
| ZNF639    | 3q26.33        | -0.08572 | 0.094341 | 0.168886404 |
| SNAR-F    | 19q13.33       | -0.08572 | 0.094348 | 0.168886404 |
| HIST1H4G  | 6p22.2         | -0.08572 | 0.094348 | 0.168886404 |
| TSPAN16   | 19p13.2        | -0.08571 | 0.094358 | 0.168890383 |
| CNOT8     | 5q33.2         | 0.08571  | 0.094372 | 0.16890001  |
| PARVA     | 11p15.3        | -0.08571 | 0.094384 | 0.168905496 |

|              |               |          |          |             |
|--------------|---------------|----------|----------|-------------|
| FBXO22-AS1   | 15q24.2       | -0.0857  | 0.094392 | 0.168905496 |
| LOC148696    | 1q32.2        | 0.08569  | 0.094447 | 0.168988049 |
| SNORA74B     | 5q35.1        | -0.08567 | 0.094511 | 0.169088678 |
| SNRPA        | 19q13.2       | -0.08565 | 0.094588 | 0.1692112   |
| KLRF1        | 12p13.31      | 0.085643 | 0.09463  | 0.169271268 |
| GRB10        | 7p12.1        | -0.08563 | 0.094691 | 0.169364092 |
| FAM227B      | 15q21.2       | 0.085594 | 0.09482  | 0.16957993  |
| GRIA3        | Xq25          | -0.08558 | 0.094862 | 0.169640672 |
| CYLC1        | Xq21.1        | -0.08558 | 0.094888 | 0.169658257 |
| MRTFA        | 22q13.1-q13.2 | -0.08558 | 0.094889 | 0.169658257 |
| DISC2        | 1q42.2        | -0.08556 | 0.094946 | 0.169744178 |
| RASGRP4      | 19q13.2       | 0.085559 | 0.094954 | 0.169744178 |
| BAZ2A        | 12q13.3       | 0.085549 | 0.094996 | 0.169788603 |
| LINC01559    | 12p13.1       | 0.085549 | 0.094996 | 0.169788603 |
| NEUROG1      | 5q31.1        | -0.08554 | 0.095013 | 0.169805    |
| IMPG2        | 3q12.3        | 0.085537 | 0.095041 | 0.169829696 |
| CNKSR3       | 6q25.2        | 0.085536 | 0.095044 | 0.169829696 |
| PLEKHO1      | 1q21.2        | -0.08553 | 0.09507  | 0.169860809 |
| FBXO21       | 12q24.22      | -0.08552 | 0.095089 | 0.169873756 |
| PIP5K1A      | 1q21.3        | -0.08552 | 0.095094 | 0.169873756 |
| SLC15A2      | 3q13.33       | -0.08551 | 0.095129 | 0.169921329 |
| TTLL11       | 9q33.2        | -0.08549 | 0.095211 | 0.170050992 |
| SPRR2E       | 1q21.3        | -0.08548 | 0.095253 | 0.170104511 |
| OLIG3        | 6q23.3        | -0.08548 | 0.095258 | 0.170104511 |
| FBXL15       | 10q24.32      | 0.085459 | 0.095344 | 0.170244387 |
| CBX7         | 22q13.1       | 0.085457 | 0.095353 | 0.170244387 |
| ERCC4        | 16p13.12      | -0.08543 | 0.095463 | 0.17042663  |
| TNFAIP3      | 6q23.3        | -0.08542 | 0.095477 | 0.170435378 |
| KLHL24       | 3q27.1        | -0.08542 | 0.095498 | 0.170457596 |
| GTPBP3       | 19p13.11      | -0.08542 | 0.095515 | 0.170472333 |
| NCOA2        | 8q13.3        | 0.085405 | 0.095556 | 0.170530478 |
| ALDH3B2      | 11q13.2       | 0.085365 | 0.095709 | 0.170788728 |
| PLXDC2       | 10p12.31      | 0.085357 | 0.095741 | 0.170831104 |
| ZWINT        | 10q21.1       | 0.085347 | 0.09578  | 0.170883112 |
| STAMBPL1     | 10q23.31      | -0.08535 | 0.095787 | 0.170883112 |
| RPTOR        | 17q25.3       | -0.08534 | 0.095802 | 0.170893378 |
| MAP3K8       | 10p11.23      | -0.08531 | 0.095906 | 0.171064136 |
| LGALS1       | 2p14          | -0.08529 | 0.095999 | 0.171214003 |
| OR10X1       | 1q23.1        | -0.08525 | 0.096153 | 0.17147464  |
| GRK7         | 3q23          | -0.08523 | 0.096219 | 0.171576139 |
| CEP78        | 9q21.2        | 0.08522  | 0.096277 | 0.17166571  |
| C11ORF96     | 11p11.2       | -0.08521 | 0.096317 | 0.171712289 |
| BARX1        | 9q22.32       | -0.08521 | 0.096323 | 0.171712289 |
| CCDC196      | 14q23.3       | 0.085207 | 0.096329 | 0.171712289 |
| TDRG1        | 6p21.2        | -0.08518 | 0.096426 | 0.171870057 |
| PAX1         | 20p11.22      | -0.08517 | 0.096476 | 0.171942647 |
| CLCNKA       | 1p36.13       | -0.08516 | 0.096503 | 0.171970946 |
| CDSN         | 6p21.33       | -0.08516 | 0.096512 | 0.171970946 |
| RPS3A        | 4q31.3        | -0.08516 | 0.096517 | 0.171970946 |
| USP20        | 9q34.11       | -0.08514 | 0.096595 | 0.172094276 |
| LOC100128164 | 3q26.2        | 0.085133 | 0.09662  | 0.172123498 |
| PCDHGA7      | 5q31.3        | -0.08513 | 0.096639 | 0.172134271 |
| DLGAP1-AS1   | 18p11.31      | -0.08513 | 0.096643 | 0.172134271 |
| C1ORF50      | 1p34.2        | -0.08512 | 0.096685 | 0.172182049 |
| UMPS         | 3q21.2        | -0.08512 | 0.096687 | 0.172182049 |
| SEMA3F       | 3p21.31       | -0.08511 | 0.096722 | 0.172228563 |
| SLC5A8       | 12q23.1-q23.2 | 0.0851   | 0.09675  | 0.172262119 |
| PIGK         | 1p31.1        | 0.085072 | 0.096859 | 0.172440838 |

|           |              |          |          |             |
|-----------|--------------|----------|----------|-------------|
| VGLL4     | 3p25.3-p25.2 | -0.08506 | 0.096904 | 0.172507032 |
| MCM3      | 6p12.2       | -0.08506 | 0.096915 | 0.172511327 |
| COPZ1     | 12q13.13     | 0.085039 | 0.096987 | 0.172622858 |
| FRAS1     | 4q21.21      | 0.085035 | 0.097004 | 0.172627457 |
| C1QL2     | 2q14.2       | -0.08503 | 0.097007 | 0.172627457 |
| ABI1      | 10p12.1      | 0.085022 | 0.097055 | 0.172699214 |
| KATNBL1P6 | 6q24.3       | 0.085006 | 0.097118 | 0.172795716 |
| OR2T2     | 1q44         | -0.08499 | 0.097192 | 0.172896329 |
| NRDC      | 1p32.3       | 0.084987 | 0.097194 | 0.172896329 |
| UVSSA     | 4p16.3       | 0.084985 | 0.097201 | 0.172896329 |
| INPP5F    | 10q26.11     | 0.084973 | 0.097249 | 0.172951601 |
| PIK3CD    | 1p36.22      | 0.084972 | 0.097253 | 0.172951601 |
| LONP2     | 16q12.1      | 0.084971 | 0.097258 | 0.172951601 |
| MRPL12    | 17q25.3      | -0.08496 | 0.097293 | 0.17299827  |
| OR11H12   | 14q11.2      | -0.08496 | 0.097306 | 0.17300635  |
| NEIL2     | 8p23.1       | 0.08495  | 0.09734  | 0.173052286 |
| BIN3      | 8p21.3       | 0.084945 | 0.097359 | 0.173070219 |
| CNTFR     | 9p13.3       | 0.084931 | 0.097413 | 0.173151031 |
| TEKT2     | 1p34.3       | -0.08492 | 0.097473 | 0.173242039 |
| HBQ1      | 16p13.3      | -0.0849  | 0.097553 | 0.173368272 |
| UBE2Q2P1  | 15q25.2      | -0.08489 | 0.097574 | 0.173390313 |
| LMBR1L    | 12q13.12     | -0.08488 | 0.097604 | 0.17342804  |
| CXCR2P1   | 2q35         | 0.084868 | 0.097666 | 0.173512481 |
| SNUPN     | 15q24.2      | -0.08487 | 0.097668 | 0.173512481 |
| LINC00111 | 21q22.3      | 0.084853 | 0.097724 | 0.173595536 |
| SUV39H2   | 10p13        | -0.0848  | 0.097915 | 0.173920283 |
| GAS2L3    | 12q23.1      | 0.084793 | 0.097962 | 0.173988419 |
| CCNB1     | 5q13.2       | 0.084775 | 0.098033 | 0.174099138 |
| IZUMO1R   | 11q21        | 0.084767 | 0.098064 | 0.174137954 |
| RNF207    | 1p36.31      | 0.084755 | 0.098115 | 0.174212716 |
| DAB1      | 1p32.2       | -0.08474 | 0.098177 | 0.174300247 |
| PIGX      | 3q29         | -0.08474 | 0.098182 | 0.174300247 |
| PDZK1P1   | 1q21.2       | -0.08474 | 0.09819  | 0.174300247 |
| CAMK2B    | 7p13         | -0.08473 | 0.09823  | 0.174356205 |
| POLR2M    | 15q21.3      | -0.08472 | 0.098249 | 0.174369549 |
| SLC26A2   | 5q32         | -0.08472 | 0.098255 | 0.174369549 |
| NRDE2     | 14q32.11     | 0.084711 | 0.098288 | 0.174411935 |
| FBXO40    | 3q13.33      | 0.084707 | 0.098304 | 0.17442535  |
| HMMR      | 5q34         | 0.08469  | 0.09837  | 0.174527189 |
| EIF1B     | 3p22.1       | -0.08468 | 0.098394 | 0.17455434  |
| PDE12     | 3p14.3       | 0.084664 | 0.098474 | 0.174674267 |
| KIAA1211L | 2q11.2       | 0.084663 | 0.098479 | 0.174674267 |
| NUCKS1    | 1q32.1       | 0.084659 | 0.098497 | 0.1746908   |
| TUBB4A    | 19p13.3      | 0.084653 | 0.09852  | 0.174702533 |
| TMEM250   | 9q34.3       | -0.08465 | 0.098522 | 0.174702533 |
| SULT1A1   | 16p11.2      | 0.084643 | 0.098561 | 0.174757873 |
| IFNE      | 9p21.3       | 0.084636 | 0.098587 | 0.174787576 |
| ST7-OT3   | 7q31.2       | -0.08462 | 0.098649 | 0.174864187 |
| SLC35B4   | 7q33         | -0.08462 | 0.098651 | 0.174864187 |
| PRICKLE4  | 6p21.1       | 0.084619 | 0.098657 | 0.174864187 |
| FBXL17    | 5q21.3       | 0.084616 | 0.098667 | 0.174864187 |
| KCNC1     | 11p15.1      | -0.08461 | 0.098674 | 0.174864187 |
| CSPG4     | 15q24.2      | -0.08461 | 0.098687 | 0.17487147  |
| IGFLR1    | 19q13.12     | 0.084608 | 0.098698 | 0.174875822 |
| RNU11     | 1p35.3       | -0.0846  | 0.098712 | 0.174885072 |
| CD274     | 9p24.1       | 0.084595 | 0.098752 | 0.174941659 |
| TAF12     | 1p35.3       | -0.08457 | 0.098866 | 0.17512691  |
| STX11     | 6q24.2       | 0.084549 | 0.098937 | 0.175238157 |



|          |               |          |          |             |
|----------|---------------|----------|----------|-------------|
| C12ORF29 | 12q21.32      | -0.08454 | 0.09896  | 0.175262372 |
| ARHGAP44 | 17p12         | 0.084537 | 0.098985 | 0.175291172 |
| RND3     | 2q23.3        | -0.08453 | 0.099022 | 0.175342099 |
| PPCDC    | 15q24.2       | 0.084496 | 0.099147 | 0.175539421 |
| PLEKHD1  | 14q24.1       | 0.084495 | 0.099153 | 0.175539421 |
| PCF11    | 11q14.1       | -0.08449 | 0.09916  | 0.175539421 |
| CHRNA3   | 15q25.1       | -0.08448 | 0.099193 | 0.175581766 |
| RUNX1T1  | 8q21.3        | -0.08448 | 0.099201 | 0.175581766 |
| KPNA4    | 3q25.33       | -0.08447 | 0.099245 | 0.175642765 |
| RYR3     | 15q13.3-q14   | -0.08447 | 0.09927  | 0.175668331 |
| EEA1     | 12q22         | -0.08446 | 0.099277 | 0.175668331 |
| PHF5A    | 22q13.2       | -0.08446 | 0.099291 | 0.175669204 |
| CSKMT    | 11q12.3       | 0.084458 | 0.099303 | 0.175669204 |
| PIEZO1   | 16q24.3       | -0.08446 | 0.099303 | 0.175669204 |
| PARP14   | 3q21.1        | 0.084443 | 0.099361 | 0.175733495 |
| SNORA72  | 8q22.2        | -0.08444 | 0.099363 | 0.175733495 |
| FAM106C  | 17p11.2       | 0.084442 | 0.099366 | 0.175733495 |
| RPL28    | 19q13.42      | -0.08443 | 0.099393 | 0.175755862 |
| F2       | 11p11.2       | -0.08443 | 0.099396 | 0.175755862 |
| NOP53    | 19q13.33      | -0.08443 | 0.099407 | 0.175759725 |
| GTSE1    | 22q13.31      | 0.084418 | 0.099461 | 0.175839108 |
| SGTB     | 5q12.3        | -0.0844  | 0.099524 | 0.175919624 |
| SPX      | 12p12.1       | -0.0844  | 0.099527 | 0.175919624 |
| SNX30    | 9q32          | -0.0844  | 0.099533 | 0.175919624 |
| CTSA     | 20q13.12      | -0.0844  | 0.099549 | 0.175933196 |
| ZNF483   | 9q31.3        | -0.08437 | 0.099639 | 0.176075235 |
| ENOPH1   | 4q21.22       | -0.08436 | 0.099715 | 0.176194807 |
| HGSNAT   | 8p11.21-p11.1 | 0.084328 | 0.099825 | 0.176374052 |
| PRAMEF16 | 1p36.21       | -0.08432 | 0.099847 | 0.176396614 |
| STK40    | 1p34.3        | -0.08431 | 0.099911 | 0.176494873 |
| EMBP1    | 1p11.2        | -0.0843  | 0.099926 | 0.17650614  |
| CSN2     | 4q13.3        | -0.08429 | 0.099968 | 0.17656405  |
| SPRR2G   | 1q21.3        | -0.08429 | 0.09999  | 0.176586463 |
| LRRC37A2 | 17q21.31      | -0.08427 | 0.100059 | 0.176693673 |
| EVC2     | 4p16.2        | -0.08426 | 0.100089 | 0.176731809 |
| SIGLEC7  | 19q13.41      | 0.084245 | 0.10016  | 0.17683575  |
| CSNK2A1  | 20p13         | -0.08424 | 0.100168 | 0.17683575  |
| MFSD14B  | 9q22.32       | 0.084241 | 0.100175 | 0.17683575  |
| N4BP2L1  | 13q13.1       | -0.08423 | 0.100223 | 0.176885382 |
| HLA-DRB6 | 6p21.32       | 0.084228 | 0.100227 | 0.176885382 |
| BPIFB2   | 20q11.21      | 0.084228 | 0.100229 | 0.176885382 |
| ZNF324B  | 19q13.43      | 0.084211 | 0.100299 | 0.176991759 |
| CTTN     | 11q13.3       | 0.084205 | 0.100323 | 0.177019239 |
| JMJD6    | 17q25.1       | -0.08419 | 0.100374 | 0.177092886 |
| FER1L5   | 2q11.2        | -0.08419 | 0.10039  | 0.17710561  |
| SIKE1    | 1p13.2        | -0.08416 | 0.100485 | 0.177258729 |
| CIC      | 19q13.2       | 0.08416  | 0.100502 | 0.177272377 |
| GPATCH2L | 14q24.3       | -0.08412 | 0.100649 | 0.177515633 |
| GULP1    | 2q32.1-q32.2  | -0.0841  | 0.100737 | 0.177655761 |
| CIAO2B   | 16q22.1       | -0.08409 | 0.100778 | 0.177712631 |
| FBLL1    | 5q34          | -0.08409 | 0.100788 | 0.177714242 |
| ANKIB1   | 7q21.2        | -0.08408 | 0.100833 | 0.177778558 |
| KLHL20   | 1q25.1        | 0.084068 | 0.100877 | 0.177840089 |
| PAK3     | Xq23          | -0.08404 | 0.100994 | 0.178030652 |
| DHRS11   | 17q12         | 0.084005 | 0.101136 | 0.178264609 |
| MROH2B   | 5p13.1        | 0.084001 | 0.10115  | 0.178265494 |
| CISH     | 3p21.2        | -0.084   | 0.101157 | 0.178265494 |
| EBI3     | 19p13.3       | 0.083998 | 0.101163 | 0.178265494 |

|            |               |          |          |             |
|------------|---------------|----------|----------|-------------|
| RAN        | 12q24.33      | -0.08399 | 0.101208 | 0.178328696 |
| NCOR2      | 12q24.31      | -0.08398 | 0.101237 | 0.17836561  |
| CNTFR-AS1  | 9p13.3        | 0.083974 | 0.101259 | 0.178388443 |
| SZT2       | 1p34.2        | 0.083968 | 0.101286 | 0.178419334 |
| TMC8       | 17q25.3       | 0.083951 | 0.101353 | 0.178516622 |
| FGF17      | 8p21.3        | -0.08395 | 0.101359 | 0.178516622 |
| RAP2A      | 13q32.1       | -0.08395 | 0.101369 | 0.178519298 |
| COX14      | 12q13.12      | -0.08393 | 0.101433 | 0.17861509  |
| WDR86      | 7q36.1        | -0.08392 | 0.101476 | 0.178675155 |
| VPS28      | 8q24.3        | -0.0839  | 0.101561 | 0.178809889 |
| PPBP       | 4q13.3        | -0.08389 | 0.101587 | 0.178840209 |
| FOXD3      | 1p31.3        | -0.08389 | 0.101612 | 0.178868571 |
| PREPL      | 2p21          | -0.08387 | 0.101705 | 0.179017039 |
| ZFYVE26    | 14q24.1       | 0.083842 | 0.101802 | 0.179170465 |
| SLC39A1    | 1q21.3        | -0.08384 | 0.101827 | 0.179185004 |
| LOC441455  | 9q22.33       | -0.08384 | 0.101828 | 0.179185004 |
| DNAJB3     | 2q37.1        | 0.083803 | 0.101961 | 0.179403507 |
| TEX37      | 2p11.2        | -0.0838  | 0.101972 | 0.179408016 |
| ZNF283     | 19q13.31      | 0.083798 | 0.101982 | 0.179409305 |
| ZC3H7A     | 16p13.13      | 0.08379  | 0.102012 | 0.17944564  |
| PRH1       | 12p13.2       | -0.08379 | 0.102024 | 0.179451637 |
| PLPPR1     | 9q31.1        | 0.083775 | 0.102075 | 0.179526238 |
| USP12      | 13q12.13      | -0.08377 | 0.102097 | 0.179547581 |
| AVP        | 20p13         | -0.08376 | 0.102137 | 0.179602318 |
| C9ORF47    | 9q22.1        | -0.08374 | 0.102212 | 0.179719328 |
| PCNP       | 3q12.3        | -0.08372 | 0.102315 | 0.179881006 |
| GAGE2C     | Xp11.23       | -0.08371 | 0.102327 | 0.179881006 |
| FGFR3      | 4p16.3        | -0.08371 | 0.102331 | 0.179881006 |
| HLA-DPB1   | 6p21.32       | 0.083709 | 0.102347 | 0.179892809 |
| TRIM42     | 3q23          | -0.08371 | 0.102358 | 0.179892809 |
| LRSAM1     | 9q33.3-q34.11 | -0.0837  | 0.102365 | 0.179892809 |
| PTPRA      | 20p13         | -0.08369 | 0.102405 | 0.17994865  |
| PAOX       | 10q26.3       | 0.083689 | 0.102428 | 0.179971795 |
| MAST1      | 19p13.13      | -0.08366 | 0.10253  | 0.180136695 |
| MRGPRG-AS1 | 11p15.4       | -0.08364 | 0.102624 | 0.18028545  |
| CDK19      | 6q21          | -0.08362 | 0.102717 | 0.180432601 |
| BSDC1      | 1p35.1        | 0.083601 | 0.102792 | 0.180546104 |
| FOXK1      | 7p22.1        | -0.0836  | 0.1028   | 0.180546104 |
| HCN4       | 15q24.1       | 0.083594 | 0.102818 | 0.180563433 |
| PARG       | 10q11.23      | -0.08357 | 0.10293  | 0.1807438   |
| RABGEF1    | 7q11.21       | -0.08357 | 0.102939 | 0.1807438   |
| CLDN5      | 22q11.21      | -0.08356 | 0.10295  | 0.18074742  |
| WRN        | 8p12          | 0.083539 | 0.103047 | 0.180901971 |
| FLG        | 1q21.3        | -0.08351 | 0.103163 | 0.181089335 |
| MPG        | 16p13.3       | -0.0835  | 0.103224 | 0.181164936 |
| YBX1       | 1p34.2        | -0.0835  | 0.103224 | 0.181164936 |
| CNST       | 1q44          | 0.083491 | 0.103247 | 0.181188192 |
| IDH1       | 2q34          | 0.08348  | 0.103293 | 0.181253724 |
| SLC23A1    | 5q31.2        | -0.08346 | 0.103375 | 0.1813818   |
| FLI1       | 11q24.3       | 0.08345  | 0.103415 | 0.181436545 |
| OR6C75     | 12q13.2       | 0.083447 | 0.103428 | 0.181442355 |
| DTWD1      | 15q21.2       | -0.08344 | 0.103456 | 0.181471918 |
| ITM2B      | 13q14.2       | 0.083439 | 0.103463 | 0.181471918 |
| FAM183BP   | 7p14.1        | 0.083432 | 0.10349  | 0.181504239 |
| HEXD       | 17q25.3       | -0.0834  | 0.103633 | 0.181739573 |
| GSC2       | 22q11.21      | -0.08339 | 0.103652 | 0.181740803 |
| HSFY1P1    | 22q11.1       | 0.083393 | 0.103652 | 0.181740803 |
| PCBD1      | 10q22.1       | -0.08339 | 0.103677 | 0.181767929 |

|          |          |          |          |             |
|----------|----------|----------|----------|-------------|
| GPS2     | 17p13.1  | 0.083384 | 0.10369  | 0.1817748   |
| KLHL14   | 18q12.1  | 0.083373 | 0.103738 | 0.181842684 |
| CCDC28A  | 6q24.1   | 0.083366 | 0.103767 | 0.181877937 |
| ELOA2    | 18q21.1  | 0.083359 | 0.103796 | 0.181913713 |
| GAGE2B   | Xp11.23  | -0.08333 | 0.103931 | 0.182134096 |
| SPCS3    | 4q34.2   | 0.083321 | 0.103954 | 0.182146015 |
| TMEM211  | 22q11.23 | -0.08332 | 0.103956 | 0.182146015 |
| SNHG9    | 16p13.3  | -0.08331 | 0.103996 | 0.182200368 |
| TMEM192  | 4q32.3   | -0.0833  | 0.104022 | 0.182230045 |
| TRIP13   | 5p15.33  | -0.08327 | 0.104147 | 0.182432689 |
| DDX42    | 17q23.3  | -0.08327 | 0.104178 | 0.182467988 |
| ECI1     | 16p13.3  | 0.083265 | 0.104187 | 0.182467988 |
| TMEM151B | 6p21.1   | -0.08326 | 0.104196 | 0.182467988 |
| APBB2    | 4p14-p13 | -0.08326 | 0.104204 | 0.182467988 |
| LY6K     | 8q24.3   | -0.08321 | 0.104402 | 0.182799126 |
| CD86     | 3q13.33  | 0.083196 | 0.104475 | 0.182911662 |
| NOC4L    | 12q24.33 | -0.08318 | 0.104562 | 0.183047042 |
| TAS2R60  | 7q35     | 0.083151 | 0.104662 | 0.183206319 |
| IGFL2    | 19q13.32 | 0.083142 | 0.104701 | 0.183259594 |
| FBXO30   | 6q24.3   | -0.08311 | 0.104821 | 0.183453635 |
| GNAT1    | 3p21.31  | -0.08311 | 0.104841 | 0.183471928 |
| MPHOSPH9 | 12q24.31 | 0.083103 | 0.104866 | 0.183498994 |
| KLHL22   | 22q11.21 | 0.08309  | 0.104917 | 0.183573044 |
| SLC25A20 | 3p21.31  | 0.083076 | 0.104979 | 0.183664509 |
| RERE     | 1p36.23  | -0.08307 | 0.105021 | 0.183722791 |
| MAPK8IP3 | 16p13.3  | -0.08306 | 0.105059 | 0.183773177 |
| NOM1     | 7q36.3   | -0.08305 | 0.105105 | 0.183837814 |
| EID2     | 19q13.2  | -0.08303 | 0.105161 | 0.183919879 |
| DUSP5P1  | 1q42.13  | 0.083029 | 0.105174 | 0.183925622 |
| CSF1     | 1p13.3   | 0.083026 | 0.105189 | 0.183936828 |
| MED8     | 1p34.2   | 0.083018 | 0.105219 | 0.183973008 |
| METTL11B | 1q24.2   | -0.083   | 0.105289 | 0.184078486 |
| PTPN21   | 14q31.3  | 0.082985 | 0.105362 | 0.184189537 |
| ZNF268   | 12q24.33 | -0.08298 | 0.105373 | 0.184194027 |
| SLC25A2  | 5q31.3   | -0.08298 | 0.105399 | 0.184223019 |
| EXD2     | 14q24.1  | 0.082948 | 0.105518 | 0.184413953 |
| FLJ13224 | 12p11.21 | -0.08294 | 0.105552 | 0.184458596 |
| SAFB     | 19p13.3  | -0.08294 | 0.105565 | 0.184461602 |
| PSTK     | 10q26.13 | -0.08293 | 0.105572 | 0.184461602 |
| ZNF41    | Xp11.3   | -0.08293 | 0.105591 | 0.184478061 |
| NRG3     | 10q23.1  | -0.08293 | 0.105612 | 0.184499005 |
| MCM5     | 22q12.3  | 0.082909 | 0.105682 | 0.184604541 |
| CASS4    | 20q13.31 | 0.0829   | 0.10572  | 0.184655833 |
| APP      | 21q21.3  | 0.082894 | 0.105742 | 0.184677101 |
| THAP1    | 8p11.21  | -0.08285 | 0.105946 | 0.185002313 |
| SOCS3    | 17q25.3  | 0.082846 | 0.105947 | 0.185002313 |
| UBC      | 12q24.31 | -0.08284 | 0.105963 | 0.185014798 |
| SLC33A1  | 3q25.31  | 0.082836 | 0.105989 | 0.185044774 |
| FAM86B1  | 8p23.1   | 0.082832 | 0.106008 | 0.185060442 |
| OR10A5   | 11p15.4  | -0.08281 | 0.106089 | 0.185186551 |
| APOC1    | 19q13.32 | -0.0828  | 0.106126 | 0.185234945 |
| RRM1     | 11p15.4  | 0.082784 | 0.10621  | 0.185365223 |
| PLG      | 6q26     | 0.082776 | 0.106243 | 0.185407168 |
| ICE1     | 5p15.32  | -0.08277 | 0.106261 | 0.185422076 |
| MARK1    | 1q41     | -0.08275 | 0.106363 | 0.185584316 |
| SNORA74A | 5q31.2   | -0.08272 | 0.106461 | 0.185738417 |
| KNDC1    | 10q26.3  | -0.08272 | 0.106488 | 0.185769437 |
| XYLT2    | 17q21.33 | -0.0827  | 0.106556 | 0.185872187 |

|           |               |          |          |             |
|-----------|---------------|----------|----------|-------------|
| TNIP2     | 4p16.3        | 0.082692 | 0.1066   | 0.185932578 |
| TBC1D9B   | 5q35.3        | 0.082685 | 0.106627 | 0.185964257 |
| TIRAP     | 11q24.2       | 0.082681 | 0.106648 | 0.185983937 |
| HCN3      | 1q22          | -0.08268 | 0.106669 | 0.185989087 |
| LACTB2    | 8q13.3        | 0.082675 | 0.10667  | 0.185989087 |
| INCENP    | 11q12.3       | 0.082625 | 0.106885 | 0.186348205 |
| VEZT      | 12q22         | 0.08257  | 0.107118 | 0.186723382 |
| SPATA4    | 4q34.2        | -0.08257 | 0.107119 | 0.186723382 |
| LONRF2    | 2q11.2        | -0.08257 | 0.107129 | 0.186725746 |
| CD276     | 15q24.1       | -0.08255 | 0.10722  | 0.186867246 |
| C9ORF72   | 9p21.2        | 0.082543 | 0.107233 | 0.186873375 |
| RRN3P3    | 16p12.2       | -0.08251 | 0.107369 | 0.187094304 |
| KTN1      | 14q22.3       | 0.082496 | 0.107435 | 0.187193475 |
| LIG4      | 13q33.3       | -0.08247 | 0.107552 | 0.187364648 |
| RNF111    | 15q22.1-q22.2 | 0.082469 | 0.107552 | 0.187364648 |
| SREBF2    | 22q13.2       | 0.082455 | 0.107608 | 0.187446265 |
| PHF24     | 9p13.3        | -0.08244 | 0.107679 | 0.187552793 |
| LINC00593 | 15q23         | 0.082435 | 0.107698 | 0.187569701 |
| DDR2      | 1q23.3        | -0.08242 | 0.107752 | 0.187647884 |
| PIANP     | 12p13.31      | -0.08241 | 0.107787 | 0.187692627 |
| DUSP7     | 3p21.2        | 0.082404 | 0.10783  | 0.187751007 |
| NUAK1     | 12q23.3       | -0.08239 | 0.10788  | 0.187822328 |
| CENPX     | 17q25.3       | -0.08239 | 0.107898 | 0.18783655  |
| TOMM40    | 19q13.32      | -0.08236 | 0.10801  | 0.188014841 |
| BOLA2     | 16p11.2       | -0.08236 | 0.108032 | 0.188037117 |
| MAS1      | 6q25.3        | -0.08235 | 0.108057 | 0.188063801 |
| HDGFL1    | 6p22.3        | -0.08233 | 0.108152 | 0.188214111 |
| HPCA      | 1p35.1        | 0.082289 | 0.108322 | 0.188492046 |
| MPC2      | 1q24.2        | 0.082279 | 0.108366 | 0.188540784 |
| LINC00882 | 3q13.12       | -0.08228 | 0.108368 | 0.188540784 |
| ECT2L     | 6q24.1        | -0.08227 | 0.108418 | 0.188610573 |
| SMG1P1    | 16p12.2       | -0.08226 | 0.108469 | 0.188683073 |
| SORBS2    | 4q35.1        | -0.08223 | 0.108578 | 0.188855504 |
| TAAR6     | 6q23.2        | -0.08221 | 0.108656 | 0.188975528 |
| WFDC5     | 20q13.12      | 0.082199 | 0.108711 | 0.18905395  |
| IL27RA    | 19p13.12      | 0.082187 | 0.108762 | 0.189127721 |
| NAGS      | 17q21.31      | 0.082164 | 0.10886  | 0.189281048 |
| CYP26A1   | 10q23.33      | -0.08216 | 0.108891 | 0.189317944 |
| SBSPON    | 8q21.11       | 0.08214  | 0.108965 | 0.189430969 |
| SMYD1     | 2p11.2        | -0.08209 | 0.109165 | 0.189759146 |
| SEC31B    | 10q24.31      | 0.082092 | 0.109173 | 0.189759146 |
| PLXND1    | 3q22.1        | 0.082078 | 0.109233 | 0.189819666 |
| EXOC3-AS1 | 5p15.33       | -0.08208 | 0.109233 | 0.189819666 |
| OR2AG2    | 11p15.4       | -0.08208 | 0.109241 | 0.189819666 |
| COX8A     | 11q13.1       | 0.082075 | 0.109246 | 0.189819666 |
| AKR1B1    | 7q33          | -0.08205 | 0.109337 | 0.189962055 |
| MROH5     | 8q24.3        | -0.08205 | 0.109355 | 0.189977015 |
| EIF2S3    | Xp22.11       | -0.08205 | 0.109365 | 0.189977744 |
| ISOC1     | 5q23.3        | 0.082028 | 0.109449 | 0.19010724  |
| UBE3C     | 7q36.3        | 0.082016 | 0.109502 | 0.190169994 |
| PFAS      | 17p13.1       | 0.082016 | 0.109504 | 0.190169994 |
| IFITM2    | 11p15.5       | -0.08201 | 0.109539 | 0.19021355  |
| MS4A5     | 11q12.2       | 0.081999 | 0.109575 | 0.190259316 |
| AP5S1     | 20p13         | -0.08199 | 0.109602 | 0.190290942 |
| LINC00923 | 15q26.2       | 0.081989 | 0.109619 | 0.190302699 |
| SLC36A1   | 5q33.1        | 0.081987 | 0.109629 | 0.190305032 |
| POTEF     | 2q21.1        | -0.08192 | 0.109941 | 0.19080179  |
| ITPKB     | 1q42.12       | 0.081915 | 0.109942 | 0.19080179  |

|           |               |          |          |             |
|-----------|---------------|----------|----------|-------------|
| DUSP27    | 1q24.1        | 0.081912 | 0.109955 | 0.19080179  |
| PFKFB1    | Xp11.21       | -0.08191 | 0.10996  | 0.19080179  |
| OR51E2    | 11p15.4       | -0.08191 | 0.109963 | 0.19080179  |
| LIMCH1    | 4p13          | 0.081901 | 0.110003 | 0.190844408 |
| TMEM14A   | 6p12.2        | -0.0819  | 0.110007 | 0.190844408 |
| FEM1A     | 19p13.3       | 0.081869 | 0.110141 | 0.191060622 |
| PSMD12    | 17q24.2       | -0.08185 | 0.110211 | 0.191164592 |
| AFAP1L1   | 5q32          | -0.08185 | 0.110237 | 0.19119365  |
| CHRD12    | 11q13.4       | -0.08184 | 0.11025  | 0.191200396 |
| CHCHD5    | 2q14.1        | -0.08184 | 0.110271 | 0.191219188 |
| CT62      | 15q23         | 0.081821 | 0.11035  | 0.19134026  |
| ISL1      | 5q11.1        | 0.081812 | 0.11039  | 0.191392302 |
| SERPINB4  | 18q21.33      | 0.081801 | 0.110441 | 0.191464928 |
| RAB39A    | 11q22.3       | -0.08178 | 0.110549 | 0.191635534 |
| MAN2B1    | 19p13.13      | 0.081726 | 0.110769 | 0.191999497 |
| CLMP      | 11q24.1       | -0.08172 | 0.110786 | 0.192012299 |
| SNAPC4    | 9q34.3        | -0.08168 | 0.110969 | 0.192312943 |
| WNT1      | 12q13.12      | 0.081675 | 0.110989 | 0.192332487 |
| GRID1     | 10q23.1-q23.2 | -0.08167 | 0.111004 | 0.192340209 |
| JAKMIP1   | 4p16.1        | 0.081668 | 0.111023 | 0.192357381 |
| ADAM11    | 17q21.31      | -0.08163 | 0.111169 | 0.192594314 |
| CD207     | 2p13.3        | 0.081614 | 0.111257 | 0.192728494 |
| TMPRSS12  | 12q13.12      | -0.08161 | 0.111266 | 0.192728494 |
| CALHM3    | 10q24.33      | -0.0816  | 0.111307 | 0.192782587 |
| PF4V1     | 4q13.3        | 0.081598 | 0.111331 | 0.192807789 |
| SEC11A    | 15q25.2-q25.3 | 0.081577 | 0.111422 | 0.192947774 |
| GATAD2B   | 1q21.3        | 0.081567 | 0.111463 | 0.193003274 |
| DANCR     | 4q12          | 0.081562 | 0.111486 | 0.193013348 |
| HIST1H2BC | 6p22.2        | 0.081562 | 0.111488 | 0.193013348 |
| PSMB8     | 6p21.32       | 0.081552 | 0.111533 | 0.193074638 |
| OR10T2    | 1q23.1        | 0.081535 | 0.111607 | 0.193185093 |
| KRTAP4-2  | 17q21.2       | -0.08152 | 0.111682 | 0.19329798  |
| BRI3      | 7q21.3        | -0.08151 | 0.111718 | 0.193344728 |
| ZNF98     | 19p12         | -0.08151 | 0.111737 | 0.193360561 |
| GRIK3     | 1p34.3        | 0.081449 | 0.111984 | 0.193770574 |
| PLK5      | 19p13.3       | -0.08144 | 0.112037 | 0.193846089 |
| TOP2B     | 3p24.2        | -0.08142 | 0.112105 | 0.19394723  |
| ZNF800    | 7q31.33       | -0.08142 | 0.112124 | 0.193963411 |
| NRIP3     | 11p15.4       | -0.0814  | 0.112222 | 0.194116323 |
| PDE1B     | 12q13.2       | -0.08138 | 0.112311 | 0.194252838 |
| GATA1     | Xp11.23       | 0.081359 | 0.112382 | 0.194358566 |
| C6        | 5p13.1        | 0.081344 | 0.11245  | 0.194458923 |
| PIGY      | 4q22.1        | -0.08133 | 0.112505 | 0.194537343 |
| CCSAP     | 1q42.13       | 0.081323 | 0.112542 | 0.19458492  |
| C17ORF53  | 17q21.31      | -0.08131 | 0.112584 | 0.19464076  |
| LHFPL5    | 6p21.31       | -0.08131 | 0.112619 | 0.194685402 |
| CFDP1     | 16q23.1       | -0.0813  | 0.112661 | 0.194734017 |
| LUZP6     | 7q33          | -0.0813  | 0.112667 | 0.194734017 |
| FLYWCH2   | 16p13.3       | -0.08129 | 0.112679 | 0.194737031 |
| H3F3A     | 1q42.12       | -0.08128 | 0.112745 | 0.194835858 |
| UCP1      | 4q31.1        | -0.08123 | 0.112973 | 0.195212248 |
| HEMK1     | 3p21.31       | -0.08121 | 0.113034 | 0.195299981 |
| RSRP1     | 1p36.11       | -0.08121 | 0.113048 | 0.195307962 |
| GNG7      | 19p13.3       | 0.081207 | 0.11306  | 0.195312633 |
| NUTM2A    | 10q23.2       | -0.0812  | 0.113077 | 0.19532472  |
| FAT1      | 4q35.2        | 0.081194 | 0.113115 | 0.195373298 |
| CLDN8     | 21q22.11      | 0.081137 | 0.113371 | 0.195799317 |
| CAPN15    | 16p13.3       | 0.081125 | 0.113423 | 0.195861289 |

|           |                |          |          |             |
|-----------|----------------|----------|----------|-------------|
| FOXRED2   | 22q12.3        | -0.08112 | 0.113427 | 0.195861289 |
| LOC284009 | 17p13.3        | -0.08112 | 0.113457 | 0.19588753  |
| OR6S1     | 14q11.2        | 0.081117 | 0.113462 | 0.19588753  |
| RPL13AP3  | 14q22.3        | -0.0811  | 0.113543 | 0.19601052  |
| ACP5      | 19p13.2        | -0.08109 | 0.113568 | 0.196037641 |
| CSTA      | 3q21.1         | -0.08108 | 0.113612 | 0.196097104 |
| RRP12     | 10q24.1        | -0.08108 | 0.113634 | 0.196118356 |
| LY6G5B    | 6p21.33        | -0.08107 | 0.113653 | 0.196133035 |
| SNORA11D  | Xp11.22        | -0.08107 | 0.113669 | 0.196143635 |
| PKD1      | 16p13.3        | -0.08106 | 0.113728 | 0.196228761 |
| FANCE     | 6p21.31        | 0.081027 | 0.113864 | 0.196446108 |
| WDR11     | 10q26.12       | 0.081011 | 0.113932 | 0.196547266 |
| PHTF2     | 7q11.23-q21.11 | -0.08101 | 0.113953 | 0.196558308 |
| ATAD1     | 10q23.31       | -0.08101 | 0.113958 | 0.196558308 |
| CCL25     | 19p13.2        | -0.081   | 0.114004 | 0.196619823 |
| CHI3L2    | 1p13.2         | 0.080981 | 0.114069 | 0.196715481 |
| SLN       | 11q22.3        | -0.08097 | 0.114101 | 0.196727575 |
| PARP16    | 15q22.31       | -0.08097 | 0.114101 | 0.196727575 |
| POU2F1    | 1q24.2         | -0.08097 | 0.114113 | 0.196727575 |
| GPR61     | 1p13.3         | 0.080969 | 0.114123 | 0.196727575 |
| ENKD1     | 16q22.1        | -0.08097 | 0.114125 | 0.196727575 |
| PXDN      | 2p25.3         | -0.08096 | 0.114182 | 0.196808826 |
| UBE2G2    | 21q22.3        | 0.080949 | 0.114214 | 0.196846817 |
| ETS1      | 11q24.3        | 0.080927 | 0.114312 | 0.196994819 |
| RIPPLY2   | 6q14.2         | -0.08093 | 0.114319 | 0.196994819 |
| TMEM11    | 17p11.2        | 0.080906 | 0.114404 | 0.197124077 |
| CBY1      | 22q13.1        | -0.08088 | 0.114521 | 0.197308784 |
| HSD17B1   | 17q21.2        | 0.080874 | 0.114547 | 0.197333687 |
| MSMP      | 9p13.3         | 0.080864 | 0.114593 | 0.197399087 |
| SEMA5A    | 5p15.31        | -0.08083 | 0.114753 | 0.197656677 |
| TINF2     | 14q12          | 0.080823 | 0.114777 | 0.197681424 |
| SPRY2     | 13q31.1        | 0.080816 | 0.11481  | 0.197721204 |
| PLK1      | 16p12.2        | 0.080779 | 0.114977 | 0.197991613 |
| YEATS4    | 12q15          | 0.080756 | 0.11508  | 0.198151862 |
| TMEM8B    | 9p13.3         | -0.08075 | 0.115106 | 0.198179997 |
| ALKBH2    | 12q24.11       | -0.08074 | 0.115145 | 0.198229889 |
| MASP1     | 3q27.3         | -0.08073 | 0.115181 | 0.198274551 |
| OR2S2     | 9p13.3         | 0.080716 | 0.115262 | 0.198397627 |
| RBM25     | 14q24.2        | 0.080704 | 0.115317 | 0.198475073 |
| TIMM9     | 14q23.1        | -0.0807  | 0.11533  | 0.198479791 |
| FOXD4L3   | 9q21.11        | 0.080692 | 0.11537  | 0.198531645 |
| HSD17B3   | 9q22.32        | -0.08066 | 0.115535 | 0.198798514 |
| LINC00523 | 14q32.2        | 0.080649 | 0.115564 | 0.198832449 |
| DGAT1     | 8q24.3         | 0.080643 | 0.115591 | 0.198846992 |
| ZNFX1     | 20q13.13       | -0.08064 | 0.115593 | 0.198846992 |
| TCEA1     | 8q11.23        | -0.08062 | 0.115675 | 0.198970827 |
| PROCR     | 20q11.22       | -0.08061 | 0.115756 | 0.199093039 |
| OMG       | 17q11.2        | 0.080596 | 0.115802 | 0.199156161 |
| SEPHS2    | 16p11.2        | -0.08059 | 0.115842 | 0.199206598 |
| PPP1R27   | 17q25.3        | -0.08055 | 0.116008 | 0.199475022 |
| NUCB1     | 19q13.33       | 0.080523 | 0.116138 | 0.199668731 |
| SND1-IT1  | 7q32.1         | -0.08052 | 0.11614  | 0.199668731 |
| IRAK3     | 12q14.3        | 0.080512 | 0.116186 | 0.199729857 |
| PYY       | 17q21.31       | 0.080506 | 0.116215 | 0.19974942  |
| SATB1     | 3p24.3         | -0.08051 | 0.116217 | 0.19974942  |
| GTF2E2    | 8p12           | 0.080486 | 0.116305 | 0.199870098 |
| NPB       | 17q25.3        | 0.080485 | 0.116307 | 0.199870098 |
| RSPH6A    | 19q13.32       | -0.08048 | 0.116329 | 0.199887253 |

|           |               |          |          |             |
|-----------|---------------|----------|----------|-------------|
| GANC      | 15q15.1       | 0.080476 | 0.116351 | 0.199887253 |
| ACSM6     | 10q23.33      | 0.080475 | 0.116352 | 0.199887253 |
| ACTR1A    | 10q24.32      | 0.080474 | 0.116357 | 0.199887253 |
| DEFB126   | 20p13         | -0.08046 | 0.116438 | 0.200008087 |
| TYR       | 11q14.3       | -0.08045 | 0.11648  | 0.200063719 |
| PRMT2     | 21q22.3       | 0.080436 | 0.11653  | 0.200132234 |
| TMEM251   | 14q32.12      | 0.080429 | 0.116562 | 0.200170649 |
| TNK2      | 3q29          | 0.080417 | 0.116618 | 0.200249593 |
| NPBWR1    | 8q11.23       | -0.08041 | 0.116651 | 0.200288511 |
| SEC14L1   | 17q25.2-q25.3 | 0.0804   | 0.116696 | 0.20034845  |
| CST11     | 20p11.21      | -0.08039 | 0.11676  | 0.200440875 |
| HR        | 8p21.3        | 0.080383 | 0.116771 | 0.200443969 |
| SDE2      | 1q42.12       | 0.080379 | 0.116794 | 0.20046559  |
| CCKAR     | 4p15.2        | -0.08037 | 0.11685  | 0.200540811 |
| LCE6A     | 1q21.3        | -0.08036 | 0.116858 | 0.200540811 |
| FAM110C   | 2p25.3        | 0.080354 | 0.116906 | 0.200607186 |
| OR6A2     | 11p15.4       | -0.08035 | 0.116944 | 0.200637719 |
| CDRT15    | 17p12         | 0.080346 | 0.116944 | 0.200637719 |
| SLC25A28  | 10q24.2       | 0.08033  | 0.117014 | 0.200740547 |
| C12ORF74  | 12q22         | -0.08033 | 0.117033 | 0.200743309 |
| RAB12     | 18p11.22      | 0.080326 | 0.117036 | 0.200743309 |
| NFKBIL1   | 6p21.33       | -0.0803  | 0.11716  | 0.200938957 |
| NRSN1     | 6p22.3        | -0.08026 | 0.117319 | 0.201194911 |
| R3HDM2    | 12q13.3       | -0.08023 | 0.11746  | 0.201406503 |
| SOWAHA    | 5q31.1        | -0.08023 | 0.117463 | 0.201406503 |
| CRYBB2    | 22q11.23      | -0.08023 | 0.117495 | 0.201444864 |
| FTH1      | 11q12.3       | -0.08022 | 0.117534 | 0.201480091 |
| ZMAT3     | 3q26.32       | 0.080216 | 0.117536 | 0.201480091 |
| ZNF233    | 19q13.31      | -0.0802  | 0.117602 | 0.201564921 |
| MAP10     | 1q42.2        | -0.0802  | 0.117606 | 0.201564921 |
| ADAP1     | 7p22.3        | 0.080192 | 0.117649 | 0.201621423 |
| DCC       | 18q21.2       | -0.08019 | 0.117671 | 0.201642757 |
| LOC541473 | 7q11.23       | -0.08016 | 0.117801 | 0.201847592 |
| DEFB118   | 20q11.21      | -0.08014 | 0.117882 | 0.201952023 |
| IFNA14    | 9p21.3        | -0.08014 | 0.117882 | 0.201952023 |
| MROH9     | 1q24.3        | -0.08014 | 0.117902 | 0.201970163 |
| HDGF      | 1q23.1        | -0.08013 | 0.117913 | 0.201970448 |
| LINC01587 | 4p16.2        | -0.08011 | 0.118007 | 0.202105552 |
| BAZ1B     | 7q11.23       | -0.08011 | 0.118012 | 0.202105552 |
| RHOJ      | 14q23.2       | -0.08011 | 0.11804  | 0.20213378  |
| ACAD8     | 11q25         | 0.080105 | 0.118048 | 0.20213378  |
| PCDHB4    | 5q31.3        | -0.08007 | 0.11822  | 0.202410247 |
| FLRT2     | 14q31.3       | -0.08006 | 0.118264 | 0.202467634 |
| RAB39B    | Xq28          | 0.080042 | 0.11834  | 0.202567347 |
| CFB       | 6p21.33       | 0.080041 | 0.118342 | 0.202567347 |
| NAGLU     | 17q21.2       | 0.080025 | 0.118417 | 0.202677545 |
| VN1R2     | 19q13.42      | 0.080015 | 0.118462 | 0.202737216 |
| SPATA31E1 | 9q22.1        | -0.08    | 0.118523 | 0.202825571 |
| TAS2R4    | 7q34          | -0.08    | 0.118542 | 0.202840307 |
| LCE5A     | 1q21.3        | 0.079986 | 0.118597 | 0.202917706 |
| PC        | 11q13.2       | 0.079967 | 0.118683 | 0.203046896 |
| CYP2C8    | 10q23.33      | 0.079963 | 0.118703 | 0.203063227 |
| POLD2     | 7p13          | -0.07996 | 0.118715 | 0.203066732 |
| DRD5      | 4p16.1        | 0.079942 | 0.118802 | 0.203197746 |
| CLGN      | 4q31.1        | -0.07994 | 0.118818 | 0.203203439 |
| PKM       | 15q23         | 0.079935 | 0.118833 | 0.203203439 |
| COL6A1    | 21q22.3       | -0.07993 | 0.118836 | 0.203203439 |
| OR2B2     | 6p22.1        | -0.07991 | 0.118932 | 0.203350329 |

|           |          |          |          |             |
|-----------|----------|----------|----------|-------------|
| TMEM273   | 10q11.23 | 0.079902 | 0.118984 | 0.203423379 |
| DIMT1     | 5q12.1   | -0.07988 | 0.119072 | 0.203548723 |
| OR10S1    | 11q24.1  | -0.07988 | 0.119078 | 0.203548723 |
| CCAR2     | 8p21.3   | 0.079867 | 0.11915  | 0.203653701 |
| PUDP      | Xp22.31  | -0.07986 | 0.119173 | 0.203675569 |
| C17ORF78  | 17q12    | 0.079855 | 0.119205 | 0.203713398 |
| ERICH5    | 8q22.2   | -0.07981 | 0.119434 | 0.204087883 |
| GAS8      | 16q24.3  | -0.07979 | 0.119497 | 0.204178514 |
| C6ORF52   | 6p24.2   | 0.079762 | 0.119636 | 0.204397385 |
| ADPRM     | 17p13.1  | 0.079757 | 0.119659 | 0.204419047 |
| SERINC5   | 5q14.1   | 0.079742 | 0.119727 | 0.204503972 |
| SEPTIN8   | 5q31.1   | 0.079742 | 0.119729 | 0.204503972 |
| MRPL41    | 9q34.3   | 0.079737 | 0.119754 | 0.204529326 |
| APOBEC3H  | 22q13.1  | 0.079732 | 0.119776 | 0.204550089 |
| LY6H      | 8q24.3   | 0.07972  | 0.11983  | 0.204624435 |
| TRA2B     | 3q27.2   | -0.07969 | 0.119955 | 0.204821236 |
| MIR205HG  | 1q32.2   | -0.07968 | 0.120028 | 0.204849925 |
| VN1R4     | 19q13.42 | -0.07968 | 0.120034 | 0.204849925 |
| OR5T3     | 11q12.1  | -0.07968 | 0.120034 | 0.204849925 |
| SPINT3    | 20q13.12 | -0.07968 | 0.120034 | 0.204849925 |
| OR4A5     | 11q11    | -0.07968 | 0.120034 | 0.204849925 |
| KRTAP13-3 | 21q22.11 | -0.07968 | 0.120034 | 0.204849925 |
| GYPC      | 2q14.3   | -0.07964 | 0.120215 | 0.205141308 |
| TAF7      | 5q31.3   | -0.07963 | 0.120229 | 0.205147847 |
| CPA5      | 7q32.2   | -0.07963 | 0.120267 | 0.205195782 |
| KRT77     | 12q13.13 | 0.079558 | 0.120586 | 0.205704996 |
| SYBU      | 8q23.2   | -0.07956 | 0.120586 | 0.205704996 |
| ZNF155    | 19q13.31 | -0.07954 | 0.120672 | 0.205833626 |
| ZNF433    | 19p13.2  | -0.07953 | 0.120701 | 0.205865974 |
| F2RL2     | 5q13.3   | -0.07951 | 0.120797 | 0.206011887 |
| PRAC1     | 17q21.32 | -0.0795  | 0.120838 | 0.206055936 |
| MYCT1     | 6q25.2   | -0.0795  | 0.120843 | 0.206055936 |
| SPATA45   | 1q32.3   | -0.07948 | 0.120949 | 0.206218228 |
| LAPTM4A   | 2p24.1   | -0.07948 | 0.120969 | 0.206236091 |
| LRRC32    | 11q13.5  | -0.07946 | 0.12103  | 0.206304326 |
| TIGD6     | 5q32     | 0.079464 | 0.12103  | 0.206304326 |
| ROPN1     | 3q21.1   | 0.079447 | 0.12111  | 0.206422366 |
| RIN2      | 20p11.23 | -0.07943 | 0.121185 | 0.206532873 |
| HIST1H4H  | 6p22.2   | -0.07943 | 0.121203 | 0.206544275 |
| BRPF1     | 3p25.3   | -0.07942 | 0.121212 | 0.206544275 |
| INS       | 11p15.5  | -0.07942 | 0.121231 | 0.206558814 |
| RPL4      | 15q22.31 | -0.07941 | 0.121271 | 0.206609135 |
| SH2B3     | 12q24.12 | 0.079402 | 0.121317 | 0.206662832 |
| LINC02447 | 4p16.1   | -0.0794  | 0.121323 | 0.206662832 |
| C1QB      | 1p36.12  | 0.07938  | 0.121423 | 0.206815154 |
| AOPEP     | 9q22.32  | -0.07935 | 0.12155  | 0.206996371 |
| MSH3      | 5q14.1   | 0.07935  | 0.121563 | 0.206996371 |
| HAUS4     | 14q11.2  | 0.07935  | 0.121564 | 0.206996371 |
| OR5H2     | 3q11.2   | -0.07935 | 0.12157  | 0.206996371 |
| OR5M10    | 11q12.1  | 0.079342 | 0.1216   | 0.207029258 |
| DUSP2     | 2q11.2   | -0.07933 | 0.121676 | 0.207141236 |
| GOLGA6B   | 15q24.1  | -0.07931 | 0.121761 | 0.207268626 |
| RAD50     | 5q31.1   | -0.0793  | 0.121811 | 0.207335864 |
| PTPRB     | 12q15    | 0.079279 | 0.1219   | 0.207468685 |
| GAPT      | 5q11.2   | 0.079258 | 0.121997 | 0.207617596 |
| OTULIN    | 5p15.2   | -0.07918 | 0.122346 | 0.208193714 |
| AMIGO3    | 3p21.31  | 0.07916  | 0.122463 | 0.208373795 |
| FBXO3     | 11p13    | -0.07915 | 0.12253  | 0.208470648 |



|           |          |          |          |             |
|-----------|----------|----------|----------|-------------|
| OPRK1     | 8q11.23  | -0.07914 | 0.122578 | 0.208535408 |
| MEAK7     | 16q24.1  | -0.07911 | 0.122708 | 0.208737425 |
| SRRT      | 7q22.1   | -0.0791  | 0.122756 | 0.208801375 |
| BTBD1     | 15q25.2  | 0.079061 | 0.122933 | 0.209084477 |
| SOS2      | 14q21.3  | 0.079054 | 0.122963 | 0.209118919 |
| CERS3     | 15q26.3  | -0.07905 | 0.122988 | 0.209143643 |
| SORD      | 15q21.1  | 0.079033 | 0.123064 | 0.209254799 |
| TIE1      | 1p34.2   | -0.07903 | 0.123076 | 0.209257088 |
| ZNF565    | 19q13.12 | -0.079   | 0.123239 | 0.209517081 |
| H2AFZ     | 4q23     | 0.078977 | 0.123333 | 0.209651472 |
| APRT      | 16q24.3  | -0.07898 | 0.123339 | 0.209651472 |
| PACS2     | 14q32.33 | -0.07896 | 0.123426 | 0.209766888 |
| UGT1A6    | 2q37.1   | 0.078957 | 0.123428 | 0.209766888 |
| KCTD2     | 17q25.1  | -0.07894 | 0.123504 | 0.209877948 |
| SLC35G6   | 17p13.1  | 0.078934 | 0.123537 | 0.20990256  |
| ALOX5AP   | 13q12.3  | 0.078933 | 0.123539 | 0.20990256  |
| CNTNAP4   | 16q23.1  | -0.07891 | 0.123674 | 0.210113094 |
| ST14      | 11q24.3  | -0.0789  | 0.123705 | 0.210147961 |
| ADGRL3    | 4q13.1   | 0.07889  | 0.123744 | 0.210197028 |
| CFAP46    | 10q26.3  | 0.078875 | 0.123818 | 0.210304431 |
| SLC9A3R2  | 16p13.3  | 0.078871 | 0.123839 | 0.210321194 |
| TRIM52    | 5q35.3   | -0.07887 | 0.123849 | 0.210321194 |
| MPZ       | 1q23.3   | -0.07885 | 0.123928 | 0.210437891 |
| RTL3      | Xq21.1   | -0.07885 | 0.123957 | 0.210454683 |
| RCAN2     | 6p12.3   | -0.07885 | 0.123959 | 0.210454683 |
| BEND3     | 6q21     | 0.078813 | 0.124114 | 0.210700908 |
| SRGAP3    | 3p25.3   | -0.07879 | 0.124201 | 0.210812177 |
| STAP2     | 19p13.3  | 0.078795 | 0.124201 | 0.210812177 |
| LOC653653 | 17q23.1  | -0.07877 | 0.124309 | 0.210978137 |
| ZNF321P   | 19q13.41 | 0.078751 | 0.124413 | 0.211127823 |
| IQSEC3    | 12p13.33 | -0.07875 | 0.124421 | 0.211127823 |
| LOC646813 | 11p11.12 | -0.07875 | 0.124429 | 0.211127823 |
| LINC00847 | 5q35.3   | 0.078708 | 0.124618 | 0.211430613 |
| PBX4      | 19p13.11 | -0.0787  | 0.124655 | 0.211475853 |
| ZNF69     | 19p13.2  | -0.0787  | 0.124676 | 0.211493027 |
| NAA30     | 14q22.3  | -0.07869 | 0.124703 | 0.211509172 |
| ART4      | 12p12.3  | -0.07869 | 0.124707 | 0.211509172 |
| ATP6V0C   | 16p13.3  | 0.078656 | 0.124869 | 0.211765736 |
| NMI       | 2q23.3   | 0.078652 | 0.124887 | 0.211779413 |
| TTF1      | 9q34.13  | -0.0786  | 0.12515  | 0.212207493 |
| SIGLEC10  | 19q13.41 | 0.078595 | 0.125161 | 0.212207493 |
| BST2      | 19p13.11 | 0.078574 | 0.125265 | 0.212365455 |
| CRIP3     | 6p21.1   | 0.078571 | 0.125276 | 0.21236742  |
| CBLN4     | 20q13.2  | -0.07855 | 0.125356 | 0.212484771 |
| PDPN      | 1p36.21  | -0.07854 | 0.125431 | 0.212593181 |
| OR52M1    | 11p15.4  | -0.07852 | 0.125511 | 0.212685626 |
| CMPK2     | 2p25.2   | 0.07852  | 0.125522 | 0.212685626 |
| CSHL1     | 17q23.3  | -0.07852 | 0.125527 | 0.212685626 |
| GALR3     | 22q13.1  | 0.078519 | 0.125528 | 0.212685626 |
| LETMD1    | 12q13.12 | -0.07851 | 0.125549 | 0.212703885 |
| MAMDC2    | 9q21.12  | -0.07851 | 0.12557  | 0.212717366 |
| NMRK1     | 9q21.13  | 0.078509 | 0.125578 | 0.212717366 |
| CDHR1     | 10q23.1  | -0.0785  | 0.125636 | 0.212783572 |
| SNX5      | 20p11.23 | -0.0785  | 0.125639 | 0.212783572 |
| PNMA5     | Xq28     | -0.07849 | 0.125669 | 0.212816395 |
| MEGF10    | 5q23.2   | 0.078486 | 0.125688 | 0.212830587 |
| IFI30     | 19p13.11 | 0.078478 | 0.125727 | 0.212879384 |
| NDUFS6    | 5p15.33  | -0.07846 | 0.125793 | 0.212972446 |

|              |          |          |          |             |
|--------------|----------|----------|----------|-------------|
| TRIM67       | 1q42.2   | -0.07846 | 0.125836 | 0.213027308 |
| KSR1         | 17q11.2  | -0.07843 | 0.125974 | 0.213243358 |
| KCNS1        | 20q13.12 | -0.07841 | 0.126061 | 0.213371941 |
| CYP4F3       | 19p13.12 | -0.0784  | 0.126092 | 0.213406784 |
| RASSF1       | 3p21.31  | 0.078396 | 0.126124 | 0.213443493 |
| RBM43        | 2q23.3   | -0.07838 | 0.12618  | 0.213519066 |
| GOLT1A       | 1q32.1   | -0.07838 | 0.126212 | 0.213555789 |
| WDR3         | 1p12     | -0.07836 | 0.12628  | 0.213652597 |
| ZFP14        | 19q13.12 | -0.07836 | 0.126308 | 0.213682266 |
| RPL39L       | 3q27.3   | -0.07835 | 0.126336 | 0.213711938 |
| CABP4        | 11q13.2  | 0.078321 | 0.126486 | 0.213947974 |
| ZNF462       | 9q31.2   | 0.078311 | 0.126535 | 0.214004296 |
| EIF2D        | 1q32.1   | 0.07831  | 0.126541 | 0.214004296 |
| LINC00924    | 15q26.2  | -0.07831 | 0.126552 | 0.214004296 |
| S100A1       | 1q21.3   | -0.07829 | 0.126647 | 0.21414779  |
| SLCO4A1-AS1  | 20q13.33 | -0.07826 | 0.126804 | 0.21438175  |
| EBF1         | 5q33.3   | -0.07826 | 0.126807 | 0.21438175  |
| IFI27        | 14q32.12 | 0.078244 | 0.12686  | 0.214452244 |
| EXOSC6       | 16q22.1  | -0.07824 | 0.126901 | 0.21450503  |
| NEU2         | 2q37.1   | -0.0782  | 0.127081 | 0.214786212 |
| ZDHHC21      | 9p22.3   | 0.078197 | 0.127089 | 0.214786212 |
| OR52E4       | 11p15.4  | -0.07819 | 0.12712  | 0.214819568 |
| LRP6         | 12p13.2  | -0.07818 | 0.127181 | 0.214904332 |
| LMAN2        | 5q35.3   | 0.078165 | 0.127245 | 0.214994476 |
| TCEAL5       | Xq22.1   | -0.07814 | 0.127352 | 0.215157782 |
| ATP6V0E2     | 7q36.1   | 0.078129 | 0.127422 | 0.215258351 |
| HACE1        | 6q16.3   | 0.078115 | 0.12749  | 0.215353935 |
| CRYGB        | 2q33.3   | -0.0781  | 0.127584 | 0.215495882 |
| KRTAP4-12    | 17q21.2  | -0.07807 | 0.127727 | 0.215718851 |
| FLJ37453     | 1p36.21  | -0.07805 | 0.127833 | 0.215879394 |
| ZNF594       | 17p13.2  | -0.07804 | 0.127855 | 0.215898588 |
| TCTA         | 3p21.31  | -0.07801 | 0.128002 | 0.216116927 |
| ANK2         | 4q25-q26 | -0.07801 | 0.128006 | 0.216116927 |
| ZNF697       | 1p12     | -0.07798 | 0.128138 | 0.216321557 |
| DAND5        | 19p13.13 | 0.077968 | 0.128212 | 0.216428617 |
| CFAP299      | 4q21.21  | -0.07795 | 0.128308 | 0.216567962 |
| BTBD16       | 10q26.13 | -0.07794 | 0.128327 | 0.216567962 |
| IL21R        | 16p12.1  | 0.077944 | 0.128327 | 0.216567962 |
| CFAP47       | Xp21.1   | -0.07793 | 0.128402 | 0.216675028 |
| LGALS7B      | 19q13.2  | -0.07792 | 0.128469 | 0.216768875 |
| INSYN2A      | 10q26.2  | -0.07791 | 0.128479 | 0.216768875 |
| ACOT7        | 1p36.31  | 0.077896 | 0.128563 | 0.216893177 |
| TOM1         | 22q12.3  | -0.07789 | 0.128593 | 0.21692494  |
| SIRT2        | 19q13.2  | -0.07789 | 0.128608 | 0.2169295   |
| MS4A7        | 11q12.2  | 0.077885 | 0.128617 | 0.2169295   |
| STC1         | 8p21.2   | -0.07788 | 0.128658 | 0.216979141 |
| MLYCD        | 16q23.3  | 0.077865 | 0.128719 | 0.217049843 |
| LOC100130872 | 4p16.3   | -0.07786 | 0.128721 | 0.217049843 |
| ARHGEF12     | 11q23.3  | 0.077855 | 0.128768 | 0.217110231 |
| PIM1         | 6p21.2   | 0.077851 | 0.128789 | 0.217127714 |
| FNDC3B       | 3q26.31  | -0.07784 | 0.128842 | 0.217198848 |
| POTEA        | 8p11.1   | -0.07782 | 0.128949 | 0.217359965 |
| CD40         | 20q13.12 | -0.07781 | 0.128966 | 0.217365424 |
| CCL11        | 17q12    | -0.07781 | 0.128981 | 0.217365424 |
| EIF4E        | 4q23     | 0.077811 | 0.128984 | 0.217365424 |
| RBBP4        | 1p35.1   | 0.077801 | 0.129033 | 0.217429454 |
| RNASE6       | 14q11.2  | 0.077776 | 0.129158 | 0.21762063  |
| HOXB2        | 17q21.32 | 0.077731 | 0.129379 | 0.217975064 |

|                         |                |          |          |             |
|-------------------------|----------------|----------|----------|-------------|
| CACNA1S                 | 1q32.1         | 0.077723 | 0.12942  | 0.21802585  |
| IFNA4                   | 9p21.3         | -0.07771 | 0.129469 | 0.218090453 |
| MRC2                    | 17q23.2        | -0.07771 | 0.129488 | 0.218104195 |
| TAS2R46                 | 12p13.2        | -0.07771 | 0.129499 | 0.218104195 |
| SESN3                   | 11q21          | -0.0777  | 0.129519 | 0.218120121 |
| TMEM154                 | 4q31.3         | -0.07769 | 0.129574 | 0.21819328  |
| DNAH9                   | 17p12          | -0.07767 | 0.129666 | 0.218329553 |
| PTPRG                   | 3p14.2         | 0.077669 | 0.129684 | 0.218342309 |
| RAB9A                   | Xp22.2         | -0.07767 | 0.129696 | 0.218344634 |
| NUPR2                   | 7p11.2         | -0.07766 | 0.129728 | 0.218372557 |
| CENPF                   | 1q41           | 0.077659 | 0.129735 | 0.218372557 |
| LY86                    | 6p25.1         | 0.077638 | 0.129839 | 0.218530191 |
| WDR31                   | 9q32           | 0.077626 | 0.1299   | 0.21861203  |
| TTK                     | 6q14.1         | -0.07762 | 0.12991  | 0.21861203  |
| PSMB6                   | 17p13.2        | 0.077619 | 0.129933 | 0.218633191 |
| PYDC1                   | 16p11.2        | 0.077617 | 0.129946 | 0.218636434 |
| PSMD3                   | 17q21.1        | -0.0776  | 0.130005 | 0.218716855 |
| ACYP2                   | 2p16.2         | -0.0776  | 0.130039 | 0.218756    |
| PDHA2                   | 4q22.3         | -0.07757 | 0.130201 | 0.218997968 |
| OAZ1                    | 19p13.3        | -0.07756 | 0.130205 | 0.218997968 |
| TYMP                    | 22q13.33       | 0.077532 | 0.130364 | 0.219247333 |
| SCAF8                   | 6q25.2         | -0.07753 | 0.130375 | 0.219247333 |
| VIM                     | 10p13          | -0.07752 | 0.130422 | 0.219308152 |
| BBS2                    | 16q13          | -0.07748 | 0.130604 | 0.219596033 |
| TMEM218                 | 11q24.2        | -0.07747 | 0.130682 | 0.219709214 |
| MCC                     | 5q22.2         | -0.07744 | 0.13083  | 0.219939725 |
| USP44                   | 12q22          | -0.07742 | 0.130946 | 0.220115415 |
| PCDHGA10                | 5q31.3         | 0.077393 | 0.131058 | 0.220268938 |
| JPT2                    | 16p13.3        | -0.07739 | 0.131059 | 0.220268938 |
| ACACA                   | 17q12          | -0.07738 | 0.131106 | 0.22032815  |
| RBM8A                   | 1q21.1         | 0.077379 | 0.13113  | 0.220351227 |
| GFER                    | 16p13.3        | -0.07735 | 0.131255 | 0.220509378 |
| OR13C4                  | 9q31.1         | 0.077354 | 0.131255 | 0.220509378 |
| GALR2                   | 17q25.1        | -0.07735 | 0.131257 | 0.220509378 |
| PEG3-AS1                | 19q13.43       | -0.07735 | 0.131271 | 0.220513541 |
| OGFOD3                  | 17q25.3        | 0.077347 | 0.13129  | 0.220526305 |
| TUBA4B                  | 2q35           | -0.07734 | 0.131339 | 0.220590358 |
| SPOCD1                  | 1p35.2         | -0.07733 | 0.131397 | 0.220669224 |
| PRRX1                   | 1q24.2         | -0.0773  | 0.131515 | 0.220848895 |
| RAB11B                  | 19p13.2        | -0.07729 | 0.131563 | 0.220898714 |
| CYP2R1                  | 11p15.2        | -0.07729 | 0.131566 | 0.220898714 |
| CLDN20                  | 6q25.3         | -0.07729 | 0.131594 | 0.220901997 |
| SEC16B                  | 1q25.2         | 0.077285 | 0.131598 | 0.220901997 |
| SPINK13                 | 5q32           | -0.07728 | 0.131601 | 0.220901997 |
| TRIM74                  | 7q11.23        | 0.07728  | 0.131624 | 0.220920218 |
| ROR2                    | 9q22.31        | -0.07728 | 0.131634 | 0.220920218 |
| SFRP1                   | 8p11.21        | -0.07727 | 0.131675 | 0.220966056 |
| RASA2                   | 3q23           | 0.077267 | 0.131688 | 0.220966056 |
| PLSCR5                  | 3q24           | -0.07727 | 0.131695 | 0.220966056 |
| PARD3B                  | 2q33.3         | -0.07725 | 0.131763 | 0.221062497 |
| YIPF4                   | 2p22.3         | -0.07724 | 0.131832 | 0.221159903 |
| TIMM44                  | 19p13.2        | -0.07723 | 0.131889 | 0.221236534 |
| PKD2                    | 17q21.33       | 0.077217 | 0.131941 | 0.221304992 |
| ARHGAP31                | 3q13.32-q13.33 | 0.077192 | 0.132067 | 0.221498584 |
| MAGEB16                 | Xp21.1         | -0.07718 | 0.132128 | 0.221580864 |
| SHD                     | 19p13.3        | 0.077172 | 0.132164 | 0.221622929 |
| SUGT1P4-STRA6LP-CCDC180 | 9q22.33        | -0.07715 | 0.132261 | 0.221766969 |
| HERC1                   | 15q22.31       | 0.07715  | 0.132277 | 0.221776367 |

|            |              |          |          |             |
|------------|--------------|----------|----------|-------------|
| UST        | 6q25.1       | 0.07714  | 0.132326 | 0.221839496 |
| SFT2D2     | 1q24.2       | 0.077136 | 0.132346 | 0.221854481 |
| KLKB1      | 4q35.2       | 0.0771   | 0.132529 | 0.222143158 |
| BRF1       | 14q32.33     | -0.07709 | 0.132567 | 0.222187062 |
| HAT1       | 2q31.1       | -0.07707 | 0.132691 | 0.222377571 |
| AADA3L3    | 1p36.21      | -0.07706 | 0.132724 | 0.222413512 |
| ENPP6      | 4q35.1       | 0.077031 | 0.132876 | 0.222650212 |
| ZNF862     | 7q36.1       | -0.07702 | 0.132938 | 0.222734849 |
| SRA1       | 5q31.3       | 0.077012 | 0.132972 | 0.222772671 |
| MDP1       | 14q12        | -0.07701 | 0.132986 | 0.222777712 |
| RABL3      | 3q13.33      | 0.076976 | 0.133156 | 0.223043316 |
| SNORA75    | 2q37.1       | -0.07697 | 0.133207 | 0.223110827 |
| BIK        | 22q13.2      | 0.076956 | 0.133252 | 0.22316827  |
| NECAP2     | 1p36.13      | 0.076951 | 0.13328  | 0.2231952   |
| LAPTM5     | 1p35.2       | 0.076945 | 0.13331  | 0.223227604 |
| MAL2       | 8q24.12      | 0.076925 | 0.133414 | 0.223382254 |
| STMN2      | 8q21.13      | -0.07691 | 0.133478 | 0.223471434 |
| PA2G4P4    | 3q25.31      | -0.07689 | 0.133592 | 0.223644294 |
| DIPK2B     | Xp11.3       | -0.07687 | 0.133677 | 0.223766261 |
| SNRNP48    | 6p24.3       | 0.076867 | 0.133706 | 0.223796894 |
| LRP1       | 12q13.3      | -0.07686 | 0.133745 | 0.223843978 |
| CLDN22     | 4q35.1       | -0.07686 | 0.133766 | 0.223860238 |
| GFRA2      | 8p21.3       | 0.076834 | 0.133874 | 0.224021152 |
| CCN6       | 6q21         | -0.07683 | 0.133906 | 0.224056005 |
| TBX1       | 22q11.21     | -0.07682 | 0.133955 | 0.224103852 |
| MDH1B      | 2q33.3       | -0.07682 | 0.133957 | 0.224103852 |
| PTGER1     | 19p13.12     | -0.07681 | 0.134008 | 0.224171377 |
| EHD3       | 2p23.1       | -0.0768  | 0.134024 | 0.224178824 |
| ZNF35      | 3p21.31      | -0.0768  | 0.134035 | 0.224178824 |
| BABAM1     | 19p13.11     | -0.07678 | 0.13416  | 0.224368717 |
| HLA-G      | 6p22.1       | 0.076734 | 0.134383 | 0.224723633 |
| ADIRF      | 10q23.2      | 0.07673  | 0.134404 | 0.224739692 |
| C16ORF70   | 16q22.1      | -0.07673 | 0.134425 | 0.224744792 |
| TCTE1      | 6p21.1       | 0.076725 | 0.134429 | 0.224744792 |
| NR1D2      | 3p24.2       | -0.07671 | 0.134486 | 0.224820876 |
| SELENOK    | 3p21.1       | -0.0767  | 0.134539 | 0.224890114 |
| OSR1       | 2p24.1       | 0.076684 | 0.134636 | 0.225034022 |
| ROCK2      | 2p25.1       | -0.07667 | 0.134714 | 0.225146064 |
| MAN1B1     | 9q34.3       | -0.07663 | 0.134898 | 0.225433891 |
| SPAG11B    | 8p23.1       | -0.07662 | 0.134965 | 0.225527693 |
| CDR2       | 16p12.2      | -0.07659 | 0.135121 | 0.22576891  |
| ORMDL3     | 17q21.1      | 0.076587 | 0.135132 | 0.22576891  |
| GCSAML-AS1 | 1q44         | 0.076579 | 0.135173 | 0.22581842  |
| SHANK3     | 22q13.33     | -0.07657 | 0.135197 | 0.225839749 |
| ASCC2      | 22q12.2      | 0.076561 | 0.135264 | 0.225933125 |
| WDFY3      | 4q21.23      | 0.076547 | 0.135338 | 0.226037571 |
| HBZ        | 16p13.3      | 0.076538 | 0.135385 | 0.226096564 |
| IYD        | 6q25.1       | -0.07652 | 0.135455 | 0.226195003 |
| IGFBP3     | 7p12.3       | -0.07649 | 0.13565  | 0.22650223  |
| CCDC181    | 1q24.2       | -0.07648 | 0.135688 | 0.226546115 |
| RORB       | 9q21.13      | -0.07648 | 0.135701 | 0.226548464 |
| SPINK6     | 5q32         | -0.07644 | 0.135864 | 0.226803095 |
| CD59       | 11p13        | 0.076431 | 0.135932 | 0.22689698  |
| MAML2      | 11q21        | -0.07643 | 0.135949 | 0.226905754 |
| LHFPL3-AS2 | 7q22.2-q22.3 | 0.076406 | 0.136057 | 0.227067877 |
| USP13      | 3q26.33      | 0.076393 | 0.136127 | 0.22716608  |
| DGCR6L     | 22q11.21     | -0.07635 | 0.136346 | 0.227512208 |
| CIRBP      | 19p13.3      | 0.076346 | 0.136369 | 0.227532089 |

|            |             |          |          |             |
|------------|-------------|----------|----------|-------------|
| KIAA0753   | 17p13.1     | 0.07632  | 0.1365   | 0.22773143  |
| PRPF38A    | 1p32.3      | -0.07631 | 0.136545 | 0.227766593 |
| KAZALD1    | 10q24.31    | 0.076308 | 0.136562 | 0.227766593 |
| BEX1       | Xq22.1 Xq22 | -0.07631 | 0.136563 | 0.227766593 |
| TSC22D2    | 3q25.1      | -0.07631 | 0.136567 | 0.227766593 |
| GUK1       | 1q42.13     | 0.076303 | 0.136591 | 0.227788342 |
| C17ORF82   | 17q23.2     | 0.076295 | 0.136632 | 0.227837717 |
| PRKX       | Xp22.33     | 0.076283 | 0.136691 | 0.227917005 |
| BBS4       | 15q24.1     | 0.07627  | 0.136761 | 0.228014692 |
| FANCD2     | 3p25.3      | 0.07625  | 0.136864 | 0.228152709 |
| TULP3      | 12p13.33    | -0.07625 | 0.136867 | 0.228152709 |
| RIBC1      | Xp11.22     | -0.07622 | 0.136998 | 0.228352427 |
| CIB4       | 2p23.3      | 0.076209 | 0.137073 | 0.228459465 |
| SPNS3      | 17p13.2     | -0.07614 | 0.13744  | 0.229051301 |
| ZBED3-AS1  | 5q13.3      | -0.07612 | 0.137549 | 0.229213442 |
| INO80      | 15q15.1     | 0.076114 | 0.137567 | 0.229225086 |
| ADGRB2     | 1p35.2      | -0.0761  | 0.137615 | 0.22928594  |
| DEGS1      | 1q42.11     | -0.0761  | 0.137659 | 0.229339435 |
| ATXN8OS    | 13q21.33    | 0.076082 | 0.137731 | 0.229441434 |
| IL26       | 12q15       | 0.07608  | 0.137745 | 0.229445727 |
| CNNM1      | 10q24.2     | -0.07607 | 0.13778  | 0.229484672 |
| RUNX1-IT1  | 21q22.12    | -0.07606 | 0.137858 | 0.229595084 |
| RHBDL1     | 16p13.3     | -0.07603 | 0.138013 | 0.229834062 |
| PYROXD1    | 12p12.1     | 0.076016 | 0.138076 | 0.229919288 |
| BCAP29     | 7q22.3      | -0.07601 | 0.138089 | 0.229922533 |
| SPRR2A     | 1q21.3      | -0.07601 | 0.138121 | 0.229956582 |
| IFT27      | 22q12.3     | 0.075998 | 0.13817  | 0.230018484 |
| DNER       | 2q36.3      | 0.075983 | 0.138246 | 0.230126289 |
| SYT10      | 12p11.1     | 0.075975 | 0.13829  | 0.230180007 |
| MFSD12     | 19p13.3     | -0.07596 | 0.138371 | 0.230296756 |
| MMP14      | 14q11.2     | -0.07595 | 0.138415 | 0.23035038  |
| KRTAP5-9   | 11q13.4     | -0.07592 | 0.138553 | 0.230554726 |
| PARP6      | 15q23       | -0.07592 | 0.138561 | 0.230554726 |
| SYT8       | 11p15.5     | 0.075913 | 0.138609 | 0.230615826 |
| COX8C      | 14q32.12    | -0.0759  | 0.13868  | 0.230714513 |
| PIF1       | 15q22.31    | -0.07589 | 0.138729 | 0.230777398 |
| TNFAIP8L2  | 1q21.3      | 0.075875 | 0.138808 | 0.230889034 |
| PRSS21     | 16p13.3     | 0.075871 | 0.138831 | 0.230908675 |
| ACTN4      | 19q13.2     | -0.07581 | 0.139152 | 0.231423055 |
| OR10H1     | 19p13.12    | -0.0758  | 0.139179 | 0.231449059 |
| DIPK1A     | 1p22.1      | 0.075793 | 0.13924  | 0.231530673 |
| KRTAP1-5   | 17q21.2     | -0.07579 | 0.13928  | 0.231577994 |
| PAXIP1     | 7q36.2      | -0.07578 | 0.139295 | 0.231584001 |
| IRS4       | Xq22.3      | 0.075764 | 0.139391 | 0.231724096 |
| SMIM6      | 17q25.1     | 0.075744 | 0.139493 | 0.23186548  |
| SLC38A5    | Xp11.23     | -0.07574 | 0.139499 | 0.23186548  |
| CDH18      | 5p14.3      | -0.07572 | 0.139641 | 0.232082359 |
| ZNF718     | 4p16.3      | 0.07571  | 0.139671 | 0.232102134 |
| FAM13A-AS1 | 4q22.1      | 0.075709 | 0.139676 | 0.232102134 |
| ERG        | 21q22.2     | -0.07569 | 0.139755 | 0.232214259 |
| CCL4       | 17q12       | 0.075689 | 0.139785 | 0.23224379  |
| MRPS6      | 21q22.11    | -0.07568 | 0.139816 | 0.232277078 |
| VTCN1      | 1p13.1-p12  | 0.075675 | 0.139858 | 0.23232638  |
| NIM1K      | 5p12        | -0.07566 | 0.139919 | 0.232409148 |
| LRRC28     | 15q26.3     | 0.075658 | 0.139944 | 0.232431421 |
| SNRNP35    | 12q24.31    | 0.07565  | 0.139988 | 0.232485388 |
| DLAT       | 11q23.1     | 0.075618 | 0.140154 | 0.232742313 |
| RAD21      | 8q24.11     | -0.07561 | 0.140212 | 0.232818892 |

|           |                        |          |          |             |
|-----------|------------------------|----------|----------|-------------|
| ANKRD26P1 | 16q11.2                | -0.07557 | 0.140408 | 0.233102624 |
| RRNAD1    | 1q23.1                 | -0.07557 | 0.140413 | 0.233102624 |
| KCNB1     | 20q13.13               | -0.07557 | 0.140423 | 0.233102624 |
| CTSW      | 11q13.1                | 0.075566 | 0.14043  | 0.233102624 |
| ISOC2     | 19q13.42               | 0.07556  | 0.140459 | 0.233126263 |
| CNTNAP2   | 7q35-q36.1             | 0.075559 | 0.140467 | 0.233126263 |
| GRK6      | 5q35.3                 | 0.075545 | 0.140539 | 0.233225519 |
| AMN1      | 12p11.21               | 0.075533 | 0.140603 | 0.233313506 |
| WDR13     | Xp11.23                | -0.07552 | 0.14066  | 0.233388332 |
| BARD1     | 2q35                   | 0.075504 | 0.140756 | 0.233529116 |
| RAP2C     | Xq26.2                 | -0.0755  | 0.140789 | 0.233558868 |
| RFLNB     | 17p13.3                | -0.0755  | 0.140801 | 0.233558868 |
| C10ORF53  | 10q11.23               | -0.07549 | 0.140809 | 0.233558868 |
| EEF1AKNMT | 1q24.3                 | -0.07549 | 0.140835 | 0.233581754 |
| ADAM18    | 8p11.22                | -0.07549 | 0.140856 | 0.233597932 |
| CXORF21   | Xp21.2                 | 0.075479 | 0.140889 | 0.233617949 |
| STAT2     | 12q13.3                | 0.075478 | 0.140892 | 0.233617949 |
| ZNF586    | 19q13.43               | -0.07546 | 0.140963 | 0.233717347 |
| SPANXA2   | Xq27.2                 | -0.07546 | 0.140979 | 0.233724818 |
| CT83      | Xq23                   | -0.07542 | 0.141214 | 0.234094217 |
| ATP6V0B   | 1p34.1                 | 0.07539  | 0.141361 | 0.234317766 |
| TPPP3     | 16q22.1                | -0.07539 | 0.141381 | 0.23433237  |
| PCBP3     | 21q22.3                | -0.07538 | 0.141411 | 0.234362086 |
| ADCY5     | 3q21.1                 | -0.07536 | 0.141492 | 0.234477413 |
| ACAD9     | 3q21.3                 | -0.07536 | 0.141541 | 0.23453868  |
| LOXL1     | 15q24.1                | -0.07531 | 0.141779 | 0.234914493 |
| PHLDB2    | 3q13.2                 | -0.07529 | 0.141867 | 0.235040782 |
| SPANXN5   | Xp11.22                | -0.07528 | 0.141918 | 0.235105866 |
| FOXP3     | Xp11.23                | 0.075254 | 0.142079 | 0.235352238 |
| SMARCB1   | 22q11.23 22q11         | -0.07524 | 0.142147 | 0.235440268 |
| OVCA2     | 17p13.3                | 0.07524  | 0.142155 | 0.235440268 |
| ANKRD7    | 7q31.31                | -0.07523 | 0.142199 | 0.235493489 |
| OR2A4     | 6q23.2                 | 0.075228 | 0.142216 | 0.235501782 |
| GGT8P     | 2p11.2                 | 0.07522  | 0.14226  | 0.235555351 |
| CHPF2     | 7q36.1                 | -0.07521 | 0.142324 | 0.235641049 |
| PPP4C     | 16p11.2                | -0.07519 | 0.1424   | 0.235748292 |
| CNDP1     | 18q22.3                | 0.075192 | 0.142412 | 0.235748292 |
| ZFAT      | 8q24.22                | -0.07518 | 0.142456 | 0.235802622 |
| PTPA      | 9q34.11                | 0.07518  | 0.142475 | 0.235813489 |
| ERMN      | 2q24.1                 | 0.075174 | 0.142507 | 0.235847682 |
| MYBL1     | 8q13.1                 | -0.07517 | 0.142549 | 0.235897844 |
| TRIM53AP  | 11q14.3                | 0.075156 | 0.142604 | 0.235968817 |
| CNTN4     | 3p26.3-p26.2           | -0.07515 | 0.142645 | 0.236000689 |
| TRIR      | 19p13.13               | -0.07515 | 0.142647 | 0.236000689 |
| MMACHC    | 1p34.1                 | 0.07514  | 0.142687 | 0.236047635 |
| RRP1      | 21q22.3                | -0.07511 | 0.14284  | 0.236280719 |
| LZTR1     | 22q11.21 22q11.1-q11.2 | -0.07508 | 0.142984 | 0.236500663 |
| SPATA12   | 3p14.3                 | -0.07507 | 0.143037 | 0.236568592 |
| ANKMY1    | 2q37.3                 | -0.07506 | 0.143095 | 0.236644143 |
| SLC16A12  | 10q23.31               | -0.07503 | 0.143286 | 0.236940782 |
| CHRD      | 3q27.1                 | -0.07502 | 0.14332  | 0.236978023 |
| ELP3      | 8p21.1                 | 0.07501  | 0.143381 | 0.237059378 |
| LIMK2     | 22q12.2                | 0.074983 | 0.143527 | 0.237279842 |
| TAS2R19   | 12p13.2                | -0.07497 | 0.143585 | 0.237356268 |
| OR56A1    | 11p15.4                | -0.07495 | 0.143685 | 0.237502059 |
| AAMP      | 2q35                   | -0.07495 | 0.143697 | 0.237503205 |
| ATP8B5P   | 9p13.3                 | -0.07494 | 0.143754 | 0.237577056 |
| GPR50     | Xq28                   | -0.07492 | 0.143845 | 0.237708341 |

|           |          |          |          |             |
|-----------|----------|----------|----------|-------------|
| ZEB1-AS1  | 10p11.22 | 0.074908 | 0.143927 | 0.237824052 |
| ADCK1     | 14q24.3  | -0.0749  | 0.143963 | 0.237863607 |
| DEPTOR    | 8q24.12  | -0.0749  | 0.143989 | 0.237887892 |
| NDST3     | 4q26     | -0.07488 | 0.144088 | 0.238022406 |
| SERPINE1  | 7q22.1   | -0.07488 | 0.144095 | 0.238022406 |
| MTMR12    | 5p13.3   | -0.07486 | 0.144161 | 0.238111652 |
| PPIAL4D   | 1q21.1   | -0.07486 | 0.144181 | 0.23812396  |
| SEMA6D    | 15q21.1  | 0.074859 | 0.144192 | 0.23812396  |
| SLCO1B7   | 12p12.2  | 0.074831 | 0.144344 | 0.238336935 |
| LILRB1    | 19q13.42 | 0.07483  | 0.144345 | 0.238336935 |
| LINC00313 | 21q22.3  | -0.07481 | 0.144441 | 0.238476586 |
| MRAS      | 3q22.3   | -0.07481 | 0.144459 | 0.238485932 |
| CD300LF   | 17q25.1  | 0.074801 | 0.144501 | 0.238520606 |
| CLIC3     | 9q34.3   | 0.074797 | 0.144523 | 0.238520606 |
| C1ORF140  | 1q41     | -0.0748  | 0.144527 | 0.238520606 |
| ELK4      | 1q32.1   | 0.074795 | 0.144536 | 0.238520606 |
| GRIP1     | 12q14.3  | -0.07479 | 0.144539 | 0.238520606 |
| TIMP2     | 17q25.3  | -0.07479 | 0.144561 | 0.238531026 |
| NGEF      | 2q37.1   | -0.07479 | 0.144569 | 0.238531026 |
| CNOT10    | 3p22.3   | -0.07477 | 0.144649 | 0.238633001 |
| DRICH1    | 22q11.23 | -0.07477 | 0.144655 | 0.238633001 |
| KLC1      | 14q32.33 | -0.07477 | 0.144682 | 0.238649415 |
| LILRA4    | 19q13.42 | 0.074767 | 0.144689 | 0.238649415 |
| PKP3      | 11p15.5  | -0.07473 | 0.144874 | 0.238936003 |
| LHFPL1    | Xq23     | -0.07471 | 0.144969 | 0.239059431 |
| COL4A1    | 13q34    | -0.07471 | 0.144973 | 0.239059431 |
| IL5RA     | 3p26.2   | 0.074695 | 0.145072 | 0.23918482  |
| SAT2      | 17p13.1  | 0.074695 | 0.145073 | 0.23918482  |
| RFPL4A    | 19q13.42 | -0.07468 | 0.145137 | 0.239271246 |
| CAPN11    | 6p21.1   | 0.074655 | 0.14529  | 0.239502457 |
| DNAJC27   | 2p23.3   | -0.07463 | 0.145414 | 0.239671005 |
| TAS2R13   | 12p13.2  | 0.074632 | 0.145416 | 0.239671005 |
| ZNF556    | 19p13.3  | -0.07463 | 0.14545  | 0.23970792  |
| COL15A1   | 9q22.33  | -0.07462 | 0.145498 | 0.239758369 |
| C1ORF53   | 1q31.3   | -0.07462 | 0.145505 | 0.239758369 |
| SLC16A6   | 17q24.2  | 0.074605 | 0.145559 | 0.239828827 |
| CYB5A     | 18q22.3  | 0.074603 | 0.145572 | 0.23983025  |
| JAKMIP2   | 5q32     | -0.07458 | 0.145685 | 0.239996144 |
| OR5M3     | 11q12.1  | 0.074566 | 0.145772 | 0.240099457 |
| OR10H4    | 19p13.12 | -0.07457 | 0.145772 | 0.240099457 |
| FAM98B    | 15q14    | 0.074536 | 0.145935 | 0.240348788 |
| CHFR      | 12q24.33 | -0.07452 | 0.146014 | 0.240459792 |
| ADGRG4    | Xq26.3   | -0.0745  | 0.146142 | 0.240649236 |
| DMAP1     | 1p34.1   | -0.07447 | 0.14632  | 0.240922591 |
| TRIM58    | 1q44     | 0.074461 | 0.146343 | 0.240941966 |
| PRB3      | 12p13.2  | -0.07445 | 0.146425 | 0.241056722 |
| TCTEX1D4  | 1p34.1   | 0.074409 | 0.146623 | 0.241362765 |
| ZNF585B   | 19q13.12 | -0.0744  | 0.146653 | 0.24139265  |
| CFP       | Xp11.23  | 0.074399 | 0.14668  | 0.241417176 |
| CMA1      | 14q12    | 0.074394 | 0.146708 | 0.241442583 |
| NUDT2     | 9p13.3   | 0.074367 | 0.146856 | 0.241666388 |
| RAMP3     | 7p13     | -0.07436 | 0.146868 | 0.241666388 |
| WTAP      | 6q25.3   | -0.07435 | 0.146945 | 0.241771438 |
| UFM1      | 13q13.3  | -0.07435 | 0.146956 | 0.241771438 |
| C1QA      | 1p36.12  | 0.074343 | 0.146984 | 0.241797957 |
| CAAP1     | 9p21.2   | 0.07433  | 0.147056 | 0.241895908 |
| CUZD1     | 10q26.13 | -0.07432 | 0.147091 | 0.241934667 |
| LOC642846 | 12p13.31 | -0.07431 | 0.147152 | 0.242014588 |

|           |           |          |          |             |
|-----------|-----------|----------|----------|-------------|
| ARPC1A    | 7q22.1    | -0.0743  | 0.147221 | 0.242108733 |
| RNU4ATAC  | 2q14.2    | -0.07429 | 0.147289 | 0.242199811 |
| EXOC1     | 4q12      | 0.074279 | 0.147335 | 0.242256489 |
| COL7A1    | 3p21.31   | -0.07427 | 0.147379 | 0.24230815  |
| KCNIP1    | 5q35.1    | -0.07422 | 0.147629 | 0.24269212  |
| RPL10A    | 6p21.31   | -0.07422 | 0.147637 | 0.24269212  |
| PRR5L     | 11p13-p12 | 0.074219 | 0.147659 | 0.242708988 |
| GABRA6    | 5q34      | -0.07421 | 0.147699 | 0.242754401 |
| SH3RF3    | 2q13      | -0.07421 | 0.147718 | 0.242765966 |
| THAP2     | 12q21.1   | -0.0742  | 0.147746 | 0.242792523 |
| COL24A1   | 1p22.3    | -0.0742  | 0.147771 | 0.24281284  |
| TECR      | 19p13.12  | -0.07419 | 0.147797 | 0.242835959 |
| SLC17A1   | 6p22.2    | -0.07418 | 0.147865 | 0.242927834 |
| SHH       | 7q36.3    | -0.07418 | 0.147896 | 0.242938903 |
| PSMC6     | 14q22.1   | -0.07418 | 0.147896 | 0.242938903 |
| BCL6B     | 17p13.1   | -0.07417 | 0.14792  | 0.242939189 |
| RGS6      | 14q24.2   | 0.07417  | 0.147929 | 0.242939189 |
| RPS8      | 1p34.1    | -0.07417 | 0.147932 | 0.242939189 |
| HLA-DOA   | 6p21.32   | 0.074159 | 0.147993 | 0.243005902 |
| C9ORF78   | 9q34.11   | -0.07416 | 0.147997 | 0.243005902 |
| STK16     | 2q35      | -0.07416 | 0.14801  | 0.243007293 |
| CEACAM8   | 19q13.2   | 0.07415  | 0.148038 | 0.243032178 |
| LINC00341 | 14q32.13  | 0.07414  | 0.148094 | 0.243104957 |
| XPO6      | 16p12.1   | -0.07411 | 0.148261 | 0.243358466 |
| PRXL2C    | 9q22.33   | -0.07408 | 0.148408 | 0.243562505 |
| SRRM2     | 16p13.3   | 0.074082 | 0.148414 | 0.243562505 |
| FAM131C   | 1p36.13   | -0.07408 | 0.148421 | 0.243562505 |
| BOLA1     | 1q21.2    | 0.074077 | 0.148439 | 0.243571623 |
| GNB5      | 15q21.2   | -0.07407 | 0.148471 | 0.243604067 |
| MAP3K19   | 2q21.3    | 0.074066 | 0.148501 | 0.243633807 |
| CCL19     | 9p13.3    | 0.07404  | 0.148644 | 0.243829573 |
| NCAPH2    | 22q13.33  | -0.07404 | 0.148645 | 0.243829573 |
| TMEM200A  | 6q23.1    | -0.07403 | 0.148721 | 0.243933913 |
| IQCF6     | 3p21.2    | 0.074022 | 0.148743 | 0.243949424 |
| PMM1      | 22q13.2   | 0.074016 | 0.148775 | 0.243983326 |
| TDP1      | 14q32.11  | -0.07398 | 0.148964 | 0.244272399 |
| MTMR3     | 22q12.2   | 0.073969 | 0.149033 | 0.2443652   |
| PFDN1     | 5q31.3    | -0.07396 | 0.14908  | 0.244422969 |
| MTHFS     | 15q25.1   | -0.07396 | 0.1491   | 0.244429678 |
| POP5      | 12q24.31  | -0.07396 | 0.149109 | 0.244429678 |
| TNC       | 9q33.1    | -0.07395 | 0.149154 | 0.244483602 |
| CDC25B    | 20p13     | -0.07394 | 0.149179 | 0.244504454 |
| WEE2      | 7q34      | -0.07394 | 0.149205 | 0.244509189 |
| PLAT      | 8p11.21   | -0.07394 | 0.149206 | 0.244509189 |
| HIPK3     | 11p13     | 0.073929 | 0.149255 | 0.244568964 |
| KIF20B    | 10q23.31  | 0.073915 | 0.149332 | 0.244675466 |
| TPTE2P1   | 13q12.13  | -0.07391 | 0.149346 | 0.244678706 |
| SYT4      | 18q12.3   | -0.07391 | 0.149386 | 0.244724988 |
| NRG2      | 5q31.2    | -0.07386 | 0.149656 | 0.245146289 |
| EFNB2     | 13q33.3   | 0.07385  | 0.149692 | 0.245185622 |
| LINC00326 | 6q23.2    | 0.073838 | 0.149759 | 0.245275001 |
| NLGN3     | Xq13.1    | 0.073828 | 0.149811 | 0.245339502 |
| MCF2      | Xq27.1    | -0.07382 | 0.149874 | 0.245423299 |
| SPINK14   | 5q32      | 0.073798 | 0.14998  | 0.245576689 |
| TEN1      | 17q25.1   | -0.07379 | 0.15005  | 0.245670581 |
| LINC01089 | 12q24.31  | -0.07377 | 0.150159 | 0.245830152 |
| DSC1      | 18q12.1   | -0.07373 | 0.150344 | 0.246113001 |
| ATP6V1B1  | 2p13.3    | -0.07373 | 0.150378 | 0.246148088 |



|           |              |          |          |             |
|-----------|--------------|----------|----------|-------------|
| GLIDR     | 9p12         | -0.07372 | 0.150405 | 0.246172411 |
| MGAT5     | 2q21.2-q21.3 | -0.07371 | 0.150461 | 0.246244197 |
| SLC6A13   | 12p13.33     | -0.07369 | 0.150559 | 0.246384575 |
| TGFBRAP1  | 2q12.1-q12.2 | -0.07366 | 0.150728 | 0.246640288 |
| CXCL11    | 4q21.1       | 0.073652 | 0.150791 | 0.246710591 |
| FAM92B    | 16q24.1      | 0.073651 | 0.150796 | 0.246710591 |
| AMPH      | 7p14.1       | -0.07365 | 0.150818 | 0.246726547 |
| OR11A1    | 6p22.1       | 0.073641 | 0.150853 | 0.246764098 |
| PWAR1     | 15q11.2      | -0.07362 | 0.150951 | 0.246904424 |
| NOVA1     | 14q12        | -0.07361 | 0.151004 | 0.246957831 |
| NOG       | 17q22        | -0.07361 | 0.151014 | 0.246957831 |
| GJB3      | 1p34.3       | 0.073609 | 0.151031 | 0.246957831 |
| BPY2      | Yq11.223     | 0.073608 | 0.151033 | 0.246957831 |
| ACSF3     | 16q24.3      | 0.073602 | 0.151068 | 0.246995014 |
| NT5C      | 17q25.1      | -0.07359 | 0.151146 | 0.247102247 |
| CFC1B     | 2q21.1       | 0.073563 | 0.151286 | 0.247296625 |
| ALDH7A1   | 5q23.2       | -0.07356 | 0.151295 | 0.247296625 |
| RAB3IP    | 12q15        | 0.07356  | 0.151302 | 0.247296625 |
| SYT5      | 19q13.42 11p | 0.073538 | 0.151422 | 0.247472196 |
| PITX1     | 5q31.1       | 0.073521 | 0.151519 | 0.247611409 |
| PVALB     | 22q12.3      | 0.073516 | 0.151546 | 0.247634152 |
| SLC34A1   | 5q35.3       | -0.0735  | 0.151612 | 0.247722224 |
| CALU      | 7q32.1       | -0.07348 | 0.15172  | 0.247878746 |
| PLCXD2    | 3q13.2       | -0.07347 | 0.151779 | 0.247954801 |
| FAM20C    | 7p22.3       | -0.07347 | 0.151802 | 0.247971913 |
| SEL1L2    | 20p12.1      | -0.07344 | 0.15196  | 0.248193795 |
| ITGA8     | 10p13        | 0.073442 | 0.151962 | 0.248193795 |
| PROZ      | 13q34        | -0.07342 | 0.152057 | 0.248328597 |
| CCDC77    | 12p13.33     | -0.07341 | 0.152119 | 0.248409059 |
| CCL2      | 17q12        | -0.07341 | 0.152132 | 0.248409501 |
| GBX1      | 7q36.1       | 0.073404 | 0.152172 | 0.248455757 |
| PALM2     | 9q31.3       | -0.0734  | 0.152188 | 0.248461475 |
| ABLIM2    | 4p16.1       | -0.0734  | 0.152213 | 0.248480578 |
| PAICS     | 4q12         | -0.07339 | 0.152272 | 0.248517074 |
| FNTB      | 14q23.3      | 0.073385 | 0.152278 | 0.248517074 |
| PTMS      | 12p13.31     | -0.07338 | 0.152286 | 0.248517074 |
| PLD4      | 14q32.33     | 0.073383 | 0.152291 | 0.248517074 |
| RFXAP     | 13q13.3      | -0.07338 | 0.152297 | 0.248517074 |
| MYOD1     | 11p15.1      | -0.07338 | 0.152313 | 0.248522358 |
| ANP32D    | 12q13.11     | -0.07337 | 0.152347 | 0.248557805 |
| RAC1      | 7p22.1       | 0.073364 | 0.152399 | 0.248607334 |
| DBX2      | 12q12        | -0.07336 | 0.152402 | 0.248607334 |
| IL37      | 2q14.1       | 0.073359 | 0.152423 | 0.248622256 |
| IPO11     | 5q12.1       | 0.073355 | 0.152447 | 0.248639634 |
| ZNF521    | 18q11.2      | -0.07335 | 0.152485 | 0.248682377 |
| GFRA1     | 10q25.3      | 0.073345 | 0.152503 | 0.248690935 |
| CAMK2A    | 5q32         | 0.073339 | 0.152536 | 0.248724984 |
| ZNF580    | 19q13.42     | -0.07334 | 0.152558 | 0.248726218 |
| DNM1P46   | 15q26.3      | 0.073335 | 0.152562 | 0.248726218 |
| PWRN2     | 15q11.2      | -0.07331 | 0.152705 | 0.248939216 |
| RGS12     | 4p16.3       | 0.073277 | 0.152884 | 0.249211861 |
| COMMD10   | 5q23.1       | -0.07327 | 0.152947 | 0.249293159 |
| TMEM163   | 2q21.3       | 0.073257 | 0.153    | 0.24935961  |
| DAGLA     | 11q12.2      | -0.07325 | 0.153018 | 0.24936894  |
| RPL23AP82 | 22q13.33     | -0.07325 | 0.153044 | 0.249390069 |
| OR6B2     | 2q37.3       | -0.07324 | 0.153077 | 0.249424322 |
| RANBP3    | 19p13.3      | -0.07323 | 0.153126 | 0.249483628 |
| ZNF441    | 19p13.2      | -0.07322 | 0.153217 | 0.249611329 |

|           |                 |          |          |             |
|-----------|-----------------|----------|----------|-------------|
| PLEK      | 2p14            | 0.073207 | 0.15328  | 0.249693666 |
| SLC30A6   | 2p22.3          | -0.0732  | 0.153298 | 0.249702969 |
| DEFA4     | 8p23.1          | 0.073188 | 0.153386 | 0.249820304 |
| TM4SF5    | 17p13.2         | 0.073186 | 0.153395 | 0.249820304 |
| HINT3     | 6q22.32         | 0.073182 | 0.15342  | 0.249840437 |
| C3ORF79   | 3q25.2          | 0.073163 | 0.153527 | 0.249988474 |
| MSX1      | 4p16.2          | -0.07316 | 0.153536 | 0.249988474 |
| KRTCAP3   | 2p23.3          | -0.07316 | 0.153564 | 0.250013592 |
| KRTAP5-11 | 11q13.4         | -0.07313 | 0.153714 | 0.250238794 |
| C11ORF65  | 11q22.3         | -0.07312 | 0.153753 | 0.250281187 |
| CACNA1I   | 22q13.1         | -0.07311 | 0.153814 | 0.250360123 |
| THOP1     | 19p13.3         | -0.0731  | 0.1539   | 0.250479896 |
| TRMT9B    | 8p22            | -0.07309 | 0.153949 | 0.250533656 |
| PPIAP80   | 7p15.1          | -0.07309 | 0.153958 | 0.250533656 |
| HAL       | 12q23.1         | 0.073082 | 0.153983 | 0.250540931 |
| KIAA0895L | 16q22.1         | -0.07308 | 0.153988 | 0.250540931 |
| CSMD3     | 8q23.3          | -0.07307 | 0.154061 | 0.250639321 |
| LINC00346 | 13q34           | -0.07307 | 0.154079 | 0.250648601 |
| C17ORF47  | 17q22           | -0.07306 | 0.154114 | 0.250674649 |
| DCAF4L1   | 4p13            | -0.07306 | 0.15413  | 0.250674649 |
| AGTPBP1   | 9q21.33         | 0.073056 | 0.154132 | 0.250674649 |
| ANXA2P3   | 10q21.3         | 0.073052 | 0.154154 | 0.25068992  |
| MAP2K6    | 17q24.3         | 0.073035 | 0.154249 | 0.250823975 |
| CYP4Z1    | 1p33            | -0.07303 | 0.154278 | 0.250851046 |
| UBE2NL    | Xq27.3          | -0.07303 | 0.154301 | 0.250868246 |
| INE1      | Xp11.3          | -0.07302 | 0.154355 | 0.250935125 |
| MEPE      | 4q22.1          | -0.073   | 0.154424 | 0.25102651  |
| ETS2      | 21q22.2         | -0.07299 | 0.15451  | 0.251146022 |
| DAZ4      | Yq11.23         | -0.07298 | 0.154553 | 0.251193877 |
| NBR1      | 17q21.31        | 0.072978 | 0.154573 | 0.251193877 |
| NDUFB2    | 7q34            | -0.07298 | 0.154577 | 0.251193877 |
| RAB33A    | Xq26.1          | 0.072972 | 0.154609 | 0.251224955 |
| KIF5B     | 10p11.22        | 0.072966 | 0.154638 | 0.251252216 |
| PIP4K2A   | 10p12.2         | 0.072943 | 0.154769 | 0.251442575 |
| XKRY2     | Yq11.222        | -0.07294 | 0.15478  | 0.251442575 |
| CLDN23    | 8p23.1          | 0.07293  | 0.154843 | 0.251524181 |
| HPVC1     | 7p11.2          | 0.07291  | 0.154959 | 0.251692437 |
| RRAGC     | 1p34.3          | 0.072904 | 0.154995 | 0.251729421 |
| MSMO1     | 4q32.3          | 0.07287  | 0.155183 | 0.252014798 |
| TMEM132B  | 12q24.31-q24.32 | 0.07285  | 0.155299 | 0.252176175 |
| C1QL3     | 10p13           | 0.072848 | 0.155307 | 0.252176175 |
| SSUH2     | 3p25.3          | -0.07284 | 0.155338 | 0.252205831 |
| NPRL2     | 3p21.31         | -0.07283 | 0.155399 | 0.252284736 |
| BAX       | 19q13.33        | 0.072817 | 0.155488 | 0.252407478 |
| C6ORF89   | 6p21.2          | 0.072811 | 0.155523 | 0.252444693 |
| TRAF7     | 16p13.3         | 0.072806 | 0.155546 | 0.252462022 |
| SPG21     | 15q22.31        | -0.07278 | 0.155708 | 0.252703956 |
| SLCO1B3   | 12p12.2         | 0.072776 | 0.155721 | 0.252703956 |
| HNRNPR    | 1p36.12         | 0.07277  | 0.155754 | 0.252736874 |
| RBM44     | 2q37.3          | -0.07276 | 0.155822 | 0.252827801 |
| DSCR10    | 21q22.13        | -0.07275 | 0.155871 | 0.25288667  |
| FBXO24    | 7q22.1          | 0.072742 | 0.155913 | 0.252934253 |
| DPY19L3   | 19q13.11        | -0.07271 | 0.156078 | 0.253155302 |
| ACTG1P4   | 1p21.1          | -0.07271 | 0.156084 | 0.253155302 |
| CCDC169   | 13q13.3         | -0.07271 | 0.156087 | 0.253155302 |
| OR5K4     | 3q11.2          | -0.07271 | 0.156109 | 0.253169846 |
| OPA3      | 19q13.32        | 0.072705 | 0.156127 | 0.253178414 |
| USP6      | 17p13.2         | -0.0727  | 0.156163 | 0.25321663  |

|           |            |          |          |             |
|-----------|------------|----------|----------|-------------|
| CHST3     | 10q22.1    | -0.07266 | 0.156383 | 0.253552107 |
| KCNJ16    | 17q24.3    | 0.072643 | 0.156478 | 0.253686011 |
| RAD51C    | 17q22      | -0.07263 | 0.15653  | 0.253750496 |
| SET       | 9q34.11    | -0.07263 | 0.156548 | 0.253757901 |
| MED19     | 11q12.1    | -0.07262 | 0.156591 | 0.253807226 |
| CD5L      | 1q23.1     | 0.072603 | 0.156709 | 0.253979012 |
| TECPR2    | 14q32.31   | -0.0726  | 0.156742 | 0.253993861 |
| SLC7A14   | 3q26.2     | -0.0726  | 0.156744 | 0.253993861 |
| FIGN      | 2q24.3     | -0.07257 | 0.156875 | 0.254185929 |
| TAF8      | 6p21.1     | -0.07256 | 0.15693  | 0.254253764 |
| SYCP2L    | 6p24.2     | -0.07254 | 0.157075 | 0.254468314 |
| SLIT3     | 5q34-q35.1 | -0.07251 | 0.157219 | 0.254680584 |
| TBC1D29P  | 17q11.2    | -0.07248 | 0.157416 | 0.254980533 |
| OR2T35    | 1q44       | -0.07246 | 0.157508 | 0.255108391 |
| DPP3      | 11q13.2    | -0.07245 | 0.157575 | 0.255195492 |
| PSMA5     | 1p13.3     | 0.072447 | 0.157601 | 0.255216942 |
| CELF4     | 18q12.2    | -0.07243 | 0.157716 | 0.255373522 |
| GTF2H4    | 6p21.33    | -0.07242 | 0.157733 | 0.255373522 |
| ICOSLG    | 21q22.3    | 0.072424 | 0.157736 | 0.255373522 |
| CNGA2     | Xq28       | 0.07242  | 0.157759 | 0.255382361 |
| CPOX      | 3q11.2     | 0.072418 | 0.157767 | 0.255382361 |
| ZNF619    | 3p22.1     | 0.072407 | 0.157835 | 0.255469685 |
| TP53TG3B  | 16p11.2    | -0.0724  | 0.157846 | 0.255469685 |
| SLED1     | 4q35.1     | 0.072398 | 0.157883 | 0.255508539 |
| METTL17   | 14q11.2    | 0.072374 | 0.158023 | 0.255714972 |
| LRAT      | 4q32.1     | -0.07237 | 0.158039 | 0.255719522 |
| NECTIN1   | 11q23.3    | -0.07236 | 0.158107 | 0.255810122 |
| KRCC1     | 2p11.2     | 0.072354 | 0.15814  | 0.255841646 |
| CCN1      | 1p22.3     | -0.07234 | 0.158197 | 0.255913327 |
| SLURP1    | 8q24.3     | -0.07232 | 0.158309 | 0.256074335 |
| MLC1      | 22q13.33   | -0.07232 | 0.15834  | 0.256083217 |
| MOB1A     | 2p13.1     | 0.072319 | 0.15834  | 0.256083217 |
| EGR3      | 8p21.3     | 0.072308 | 0.158405 | 0.256168039 |
| EXOC1L    | 4q12       | 0.072299 | 0.158457 | 0.256230199 |
| C1RL      | 12p13.31   | 0.07229  | 0.158506 | 0.256289429 |
| HES3      | 1p36.31    | -0.07229 | 0.158532 | 0.256311356 |
| ATAD2     | 8q24.13    | -0.07227 | 0.158597 | 0.256394775 |
| CCR2      | 3p21.31    | 0.072257 | 0.158699 | 0.256538555 |
| LCLAT1    | 2p23.1     | -0.07223 | 0.158842 | 0.256749592 |
| SETBP1    | 18q12.3    | 0.072228 | 0.158866 | 0.256767105 |
| ANAPC15   | 11q13.4    | -0.07222 | 0.158888 | 0.256782607 |
| SLC13A5   | 17p13.1    | -0.07221 | 0.158945 | 0.256854374 |
| RSPH3     | 6q25.3     | 0.072212 | 0.158959 | 0.256855882 |
| GNMT      | 6p21.1     | -0.07218 | 0.159127 | 0.257107384 |
| VPS25     | 17q21.2    | -0.07216 | 0.159252 | 0.25728767  |
| SLFN12L   | 17q12      | 0.072137 | 0.159394 | 0.257496446 |
| SIK3      | 11q23.3    | -0.07211 | 0.159528 | 0.257691801 |
| WASF1     | 6q21       | -0.07209 | 0.159669 | 0.257899064 |
| NGRN      | 15q26.1    | -0.07206 | 0.159832 | 0.258140786 |
| POLD1     | 19q13.33   | -0.07206 | 0.159858 | 0.258162393 |
| CC2D2B    | 10q24.1    | -0.07204 | 0.159975 | 0.258330784 |
| LOC401052 | 3p25.3     | -0.07202 | 0.160077 | 0.258459661 |
| REXO2     | 11q23.2    | -0.07202 | 0.160081 | 0.258459661 |
| HEBP2     | 6q24.1     | -0.07199 | 0.160274 | 0.258750313 |
| NAGPA     | 16p13.3    | 0.071978 | 0.160319 | 0.258802306 |
| EIF2S1    | 14q23.3    | 0.071974 | 0.160339 | 0.258813826 |
| FSHR      | 2p16.3     | -0.07195 | 0.160456 | 0.258982211 |
| CTAG2     | Xq28       | -0.07195 | 0.160507 | 0.259044093 |

|              |          |          |          |             |
|--------------|----------|----------|----------|-------------|
| CACYBP       | 1q25.1   | -0.07194 | 0.160546 | 0.259085277 |
| NRIP2        | 12p13.33 | -0.07193 | 0.160596 | 0.259145418 |
| PLPP2        | 19p13.3  | 0.071923 | 0.160636 | 0.259189361 |
| RAG2         | 11p12    | -0.07192 | 0.160684 | 0.259245102 |
| LINC00200    | 10p15.3  | -0.07191 | 0.160732 | 0.259298929 |
| IGSF6        | 16p12.2  | 0.071905 | 0.160743 | 0.259298929 |
| RS1          | Xp22.13  | -0.07188 | 0.160902 | 0.2595161   |
| RUNX2        | 6p21.1   | -0.07188 | 0.16091  | 0.2595161   |
| HNF1B        | 17q12    | 0.071873 | 0.16093  | 0.2595161   |
| LINC00896    | 22q11.21 | 0.07187  | 0.160948 | 0.2595161   |
| SAT1         | Xp22.11  | 0.071869 | 0.160951 | 0.2595161   |
| EPHX3        | 19p13.12 | -0.07187 | 0.160955 | 0.2595161   |
| NEK4         | 3p21.1   | 0.071852 | 0.161051 | 0.259649351 |
| GADD45B      | 19p13.3  | -0.07184 | 0.161129 | 0.259754209 |
| CA5B         | Xp22.2   | -0.07183 | 0.161198 | 0.259844891 |
| OR2A2        | 7q35     | 0.071823 | 0.161222 | 0.259862625 |
| COPB1        | 11p15.2  | 0.071793 | 0.161397 | 0.260123783 |
| CHURC1       | 14q23.3  | 0.071764 | 0.161568 | 0.260379125 |
| LINC00526    | 18p11.31 | -0.07175 | 0.161638 | 0.260469957 |
| NOCT         | 4q31.1   | 0.071722 | 0.161811 | 0.260727575 |
| C12ORF10     | 12q13.13 | -0.0717  | 0.161918 | 0.260879536 |
| TNFRSF4      | 1p36.33  | -0.0717  | 0.161969 | 0.260939918 |
| THBS1        | 15q14    | -0.07169 | 0.162012 | 0.260988169 |
| VSIG10L      | 19q13.41 | 0.071686 | 0.162026 | 0.26099055  |
| TLR7         | Xp22.2   | 0.071672 | 0.162105 | 0.261096833 |
| GIMAP6       | 7q36.1   | 0.071649 | 0.16224  | 0.261293757 |
| NIPSNAP3A    | 9q31.1   | 0.071635 | 0.162321 | 0.261402506 |
| SEC22C       | 3p22.1   | -0.07163 | 0.162334 | 0.261402506 |
| RAP1GDS1     | 4q23     | 0.071627 | 0.162372 | 0.261442625 |
| METTL3       | 14q11.2  | -0.07162 | 0.162405 | 0.261474596 |
| COL16A1      | 1p35.2   | -0.07161 | 0.162456 | 0.261525046 |
| IFNB1        | 9p21.3   | -0.07161 | 0.162462 | 0.261525046 |
| PSME1        | 14q12    | 0.071593 | 0.162568 | 0.26167451  |
| STAG3L3      | 7q11.23  | -0.07157 | 0.162689 | 0.261847245 |
| KCNT2        | 1q31.3   | -0.07156 | 0.162779 | 0.261971775 |
| LOC391322    | 22q11.23 | 0.071543 | 0.162866 | 0.262039307 |
| GABRA4       | 4p12     | -0.07154 | 0.162869 | 0.262039307 |
| NAB1         | 2q32.2   | 0.071542 | 0.162873 | 0.262039307 |
| CBWD6        | 9p11.2   | -0.07154 | 0.162874 | 0.262039307 |
| MRPL50       | 9q31.1   | 0.071539 | 0.162886 | 0.262039307 |
| FANCD2OS     | 3p25.3   | 0.071535 | 0.16291  | 0.262055348 |
| PPP1R3E      | 14q11.2  | 0.071532 | 0.162928 | 0.26206351  |
| C1ORF100     | 1q44     | 0.071521 | 0.162993 | 0.262148077 |
| AKAP11       | 13q14.11 | -0.07152 | 0.163015 | 0.262161281 |
| ESRRA        | 11q13.1  | -0.07151 | 0.163038 | 0.262176979 |
| PSMB9        | 6p21.32  | 0.071505 | 0.163088 | 0.262237599 |
| LMO2         | 11p13    | 0.071496 | 0.163144 | 0.262306398 |
| NHLRC3       | 13q13.3  | -0.07149 | 0.163173 | 0.262332315 |
| COL6A5       | 3q22.1   | 0.071484 | 0.16321  | 0.262369799 |
| VCPIP1       | 8q13.1   | -0.07145 | 0.163425 | 0.262694781 |
| LOC100130093 | 1q42.13  | -0.07144 | 0.163472 | 0.262749347 |
| AKAP1        | 17q22    | -0.07143 | 0.163529 | 0.262820281 |
| TCTEX1D2     | 3q29     | -0.0714  | 0.163681 | 0.263019627 |
| RNF123       | 3p21.31  | 0.071405 | 0.163681 | 0.263019627 |
| ARGFX        | 3q13.33  | 0.071403 | 0.163693 | 0.263019627 |
| REPS1        | 6q24.1   | -0.07139 | 0.163751 | 0.263091866 |
| H1FO         | 22q13.1  | -0.07139 | 0.163784 | 0.263111605 |
| LINC01102    | 2q12.1   | 0.071386 | 0.16379  | 0.263111605 |

|            |          |          |          |             |
|------------|----------|----------|----------|-------------|
| ABCA13     | 7p12.3   | 0.071382 | 0.163816 | 0.26313229  |
| LRRC25     | 19p13.11 | 0.07138  | 0.163829 | 0.26313229  |
| NUP54      | 4q21.1   | 0.071374 | 0.163861 | 0.263162355 |
| SNORA84    | 9q22.31  | -0.07137 | 0.163876 | 0.263166699 |
| SELENOI    | 2p23.3   | -0.07135 | 0.163999 | 0.263343289 |
| KCNJ10     | 1q23.2   | -0.07134 | 0.164054 | 0.263409136 |
| DAP3       | 1q22     | -0.07132 | 0.1642   | 0.263607037 |
| SV2B       | 15q26.1  | -0.07132 | 0.164206 | 0.263607037 |
| TRIM45     | 1p13.1   | 0.071314 | 0.164216 | 0.263607037 |
| PXDC1      | 6p25.2   | -0.07129 | 0.164371 | 0.263817828 |
| FAM138F    | 19p13.3  | -0.07129 | 0.164374 | 0.263817828 |
| PABPC1P2   | 2q22.3   | -0.07126 | 0.16451  | 0.264004269 |
| ZWILCH     | 15q22.31 | 0.071264 | 0.164517 | 0.264004269 |
| GINM1      | 6q25.1   | 0.071252 | 0.164584 | 0.264077154 |
| GDF3       | 12p13.31 | -0.07125 | 0.164588 | 0.264077154 |
| CDC20B     | 5q11.2   | 0.071249 | 0.164605 | 0.264082972 |
| OR4F5      | 1p36.33  | 0.071235 | 0.164687 | 0.264193387 |
| GMPS       | 3q25.31  | -0.07122 | 0.164761 | 0.264290397 |
| SMIM5      | 17q25.1  | 0.071213 | 0.164821 | 0.264365678 |
| ZNF774     | 15q26.1  | 0.0712   | 0.164897 | 0.26446569  |
| CYP2D6     | 22q13.2  | -0.07118 | 0.165019 | 0.264640642 |
| AKR1C8P    | 10p15.1  | -0.07116 | 0.165152 | 0.26483375  |
| BSND       | 1p32.3   | 0.071138 | 0.165266 | 0.26498507  |
| NVL        | 1q42.11  | -0.07114 | 0.165273 | 0.26498507  |
| CCNY       | 10p11.21 | 0.071115 | 0.165399 | 0.265165477 |
| CNTLN      | 9p22.2   | 0.071072 | 0.16566  | 0.265562148 |
| GTF2F1     | 19p13.3  | -0.07107 | 0.165698 | 0.265602688 |
| VN1R1      | 19q13.43 | -0.07106 | 0.165737 | 0.265643029 |
| MS4A4A     | 11q12.2  | 0.071055 | 0.165759 | 0.265656996 |
| PSPC1      | 13q12.11 | -0.07104 | 0.165823 | 0.265738758 |
| CMKLR1     | 12q23.3  | 0.07103  | 0.165909 | 0.265855576 |
| SLC39A6    | 18q12.2  | 0.071022 | 0.165955 | 0.265908515 |
| UTP15      | 5q13.2   | 0.07101  | 0.166026 | 0.266000639 |
| PRSS35     | 6q14.2   | 0.071006 | 0.166053 | 0.266022376 |
| MIRLET7BHG | 22q13.31 | -0.071   | 0.166116 | 0.266101369 |
| LINC01001  | 11p15.5  | -0.07098 | 0.166183 | 0.266171253 |
| ANKRD24    | 19p13.3  | 0.070984 | 0.166186 | 0.266171253 |
| GSTM2      | 1p13.3   | -0.07094 | 0.166444 | 0.266562431 |
| WFDC8      | 20q13.12 | 0.070938 | 0.166457 | 0.266562431 |
| PLA1A      | 3q13.33  | -0.07091 | 0.166608 | 0.266783452 |
| KHNYN      | 14q12    | 0.070897 | 0.166706 | 0.266918189 |
| SIM1       | 6q16.3   | -0.07089 | 0.16673  | 0.266935758 |
| BRDTP1     | Xq21.33  | -0.07086 | 0.166906 | 0.267197035 |
| ANGPTL4    | 19p13.2  | 0.070856 | 0.166948 | 0.267242912 |
| ST18       | 8q11.23  | 0.070851 | 0.166981 | 0.267273144 |
| RNASE11    | 14q11.2  | -0.07085 | 0.167004 | 0.267289094 |
| RIPOR1     | 16q22.1  | -0.07084 | 0.167021 | 0.267294691 |
| SCG2       | 2q36.1   | -0.07084 | 0.167062 | 0.267339542 |
| BRAF       | 7q34     | -0.07082 | 0.167154 | 0.267465115 |
| MARS2      | 2q33.1   | -0.07079 | 0.167329 | 0.267723271 |
| ZNF784     | 19q13.42 | 0.070787 | 0.167364 | 0.267757774 |
| MSX2P1     | 17q22    | -0.07078 | 0.167387 | 0.267774209 |
| HIST1H2BB  | 6p22.2   | -0.07078 | 0.167413 | 0.26779429  |
| TMEM233    | 12q24.23 | -0.07074 | 0.167627 | 0.268115053 |
| KIR2DL3    | 19q13.42 | 0.07074  | 0.167648 | 0.268126638 |
| SLC5A1     | 22q12.3  | 0.070732 | 0.167699 | 0.268187615 |
| TCF4       | 18q21.2  | -0.07073 | 0.167732 | 0.268202852 |
| ADAMTSL4   | 1q21.2   | -0.07073 | 0.167736 | 0.268202852 |

|              |                       |          |          |             |
|--------------|-----------------------|----------|----------|-------------|
| SNHG3        | 1p35.3                | -0.0707  | 0.16786  | 0.268341869 |
| SPDYE5       | 7q11.23               | -0.0707  | 0.167861 | 0.268341869 |
| C19ORF48     | 19q13.33              | -0.0707  | 0.167863 | 0.268341869 |
| SPPL2B       | 19p13.3               | -0.0707  | 0.167887 | 0.268359865 |
| ZFPL1        | 11q13.1               | -0.07069 | 0.167948 | 0.268435957 |
| LOC391343    | 2p25.3                | -0.07069 | 0.167971 | 0.268451119 |
| SKI          | 1p36.33-p36.32        | -0.07068 | 0.168021 | 0.268509314 |
| ZNF655       | 7q22.1                | -0.07067 | 0.168048 | 0.268518346 |
| SLC38A2      | 12q13.11              | 0.070673 | 0.168054 | 0.268518346 |
| DLX1         | 2q31.1                | -0.07067 | 0.168096 | 0.268553456 |
| PEX5L        | 3q26.33               | -0.07066 | 0.168102 | 0.268553456 |
| LZTFL1       | 3p21.31               | -0.07065 | 0.168207 | 0.268698996 |
| HAUS2        | 15q15.2               | -0.0706  | 0.168505 | 0.269153285 |
| ZNF101       | 19p13.11              | -0.07058 | 0.168613 | 0.269293305 |
| WDR54        | 2p13.1                | -0.07058 | 0.168619 | 0.269293305 |
| KCNE1        | 21q22.12              | 0.070576 | 0.168641 | 0.269307109 |
| ATP5MGL      | 22q13.2               | 0.070566 | 0.168701 | 0.26938016  |
| ZSCAN31      | 6p22.1 6p22.3-p22.1   | -0.07056 | 0.168715 | 0.269381696 |
| ACMSD        | 2q21.3                | 0.07056  | 0.168736 | 0.269393898 |
| DAXX         | 6p21.32               | -0.07056 | 0.16875  | 0.269393898 |
| TM6SF1       | 15q25.2               | -0.07054 | 0.168851 | 0.269534604 |
| CHODL        | 21q21.1               | -0.07053 | 0.168944 | 0.26966193  |
| ACOX2        | 3p14.3                | -0.0705  | 0.169113 | 0.269910096 |
| LINC00028    | 20q11.21              | -0.07048 | 0.169207 | 0.270019965 |
| KMT2B        | 19q13.12              | -0.07048 | 0.169218 | 0.270019965 |
| GPR26        | 10q26.13              | -0.07048 | 0.169223 | 0.270019965 |
| ANGPTL8      | 19p13.2               | -0.07047 | 0.169276 | 0.270083465 |
| ADCY1        | 7p12.3                | -0.07046 | 0.169323 | 0.270137924 |
| ITPRIP       | 10q25.1               | 0.070423 | 0.169568 | 0.270506256 |
| PNLIPRP1     | 10q25.3               | -0.07042 | 0.169584 | 0.270509846 |
| SYCP1        | 1p13.2                | -0.07041 | 0.169659 | 0.270602239 |
| TPR          | 1q31.1                | 0.070406 | 0.169669 | 0.270602239 |
| DNAJB1       | 19p13.12              | -0.07039 | 0.16976  | 0.27072675  |
| PARP11       | 12p13.32              | -0.07038 | 0.169815 | 0.270792851 |
| NDUFA3       | 19q13.42              | -0.07037 | 0.169858 | 0.270840173 |
| GDF2         | 10q11.22              | 0.070364 | 0.169924 | 0.270878169 |
| DDX25        | 11q24.2               | 0.070363 | 0.169931 | 0.270878169 |
| MRPL47       | 3q26.33               | -0.07036 | 0.169947 | 0.270878169 |
| PAPPA        | 9q33.1                | -0.07036 | 0.169949 | 0.270878169 |
| GABRG2       | 5q34                  | -0.07036 | 0.16995  | 0.270878169 |
| SOX6         | 11p15.2               | -0.07035 | 0.170014 | 0.270959238 |
| COG8         | 16q22.1               | 0.070321 | 0.170185 | 0.271209194 |
| TMED7-TICAM2 | 5q22.3                | 0.070311 | 0.170248 | 0.271288238 |
| FDPSP2       | 7q11.23               | 0.070303 | 0.170295 | 0.271341524 |
| HMGB2        | 4q34.1                | 0.070294 | 0.170354 | 0.271414032 |
| SOHLH2       | 13q13.3               | -0.07029 | 0.170398 | 0.27146074  |
| WAC          | 10p12.1 10p12.1-p11.2 | 0.070284 | 0.17041  | 0.27146074  |
| SMCP         | 1q21.3                | -0.07027 | 0.17051  | 0.271587736 |
| MBD3L2       | 19p13.2               | -0.07027 | 0.170517 | 0.271587736 |
| GIMAP7       | 7q36.1                | 0.070221 | 0.170794 | 0.272006803 |
| HARS2        | 5q31.3                | 0.070202 | 0.170913 | 0.272175729 |
| ESM1         | 5q11.2                | -0.07019 | 0.17097  | 0.272244158 |
| FBXL14       | 12p13.33              | 0.070182 | 0.171032 | 0.272320979 |
| MBTPS1       | 16q23.3-q24.1         | 0.070159 | 0.171175 | 0.272527771 |
| CGGBP1       | 3p11.1                | -0.07015 | 0.171232 | 0.272596259 |
| MMP19        | 12q13.2               | -0.07012 | 0.171439 | 0.272903911 |
| PGPEP1L      | 15q26.3               | -0.07011 | 0.171473 | 0.272936664 |
| CCDC30       | 1p34.2                | 0.070088 | 0.171609 | 0.2731313   |

|            |                    |          |          |             |
|------------|--------------------|----------|----------|-------------|
| ZNF204P    | 6p22.1             | 0.070072 | 0.171705 | 0.273262896 |
| KRTAP10-12 | 21q22.3            | -0.07007 | 0.171746 | 0.273306216 |
| LOC401463  | 8q12.3             | -0.07004 | 0.171903 | 0.27353491  |
| PI16       | 6p21.2             | -0.07004 | 0.171926 | 0.273549101 |
| NCCRP1     | 19q13.2            | -0.07003 | 0.171992 | 0.273631557 |
| ZNF207     | 17q11.2            | -0.06999 | 0.17219  | 0.273925732 |
| MTG1       | 10q26.3            | -0.06999 | 0.172228 | 0.273964992 |
| SAA3P      | 11p15.1            | 0.069984 | 0.172249 | 0.273975505 |
| FAXDC2     | 5q33.2             | -0.06998 | 0.172268 | 0.2739846   |
| NDUFB5     | 3q26.33            | 0.069978 | 0.172283 | 0.273985988 |
| MTMR8      | Xq11.2             | -0.06995 | 0.172465 | 0.274253579 |
| CSF3       | 17q21.1            | -0.06994 | 0.172537 | 0.274346704 |
| RNF187     | 1q42.13            | -0.06992 | 0.172644 | 0.274494403 |
|            | 1-Mar 4q32.2-q32.3 | 0.069892 | 0.172814 | 0.274743475 |
| TGIF2LY    | Yp11.2             | -0.06988 | 0.17286  | 0.274794508 |
| RPS6KA4    | 11q13.1            | -0.06988 | 0.172913 | 0.274857998 |
| MYH6       | 14q11.2            | -0.06987 | 0.172979 | 0.274940005 |
| UOX        | 1p31.1             | -0.06985 | 0.173095 | 0.275102962 |
| GAL3ST1    | 22q12.2            | 0.069838 | 0.173147 | 0.275163837 |
| TRIM66     | 11p15.4            | -0.06983 | 0.173211 | 0.275243316 |
| AGO3       | 1p34.3             | -0.06982 | 0.173245 | 0.275276363 |
| LINC00472  | 6q13               | -0.06982 | 0.173286 | 0.275295338 |
| UBALD1     | 16p13.3            | -0.06981 | 0.173292 | 0.275295338 |
| IL36G      | 2q14.1             | -0.06981 | 0.173298 | 0.275295338 |
| SYDE2      | 1p22.3             | -0.06981 | 0.173318 | 0.275304029 |
| MAP3K3     | 17q23.3            | -0.06981 | 0.173345 | 0.275325509 |
| PSMC5      | 17q23.3            | -0.06979 | 0.173461 | 0.275487378 |
| UNC5A      | 5q35.2             | 0.069784 | 0.173478 | 0.275493223 |
| AUTS2      | 7q11.22            | -0.06978 | 0.173532 | 0.275557743 |
| RAB38      | 11q14.2            | -0.06976 | 0.173644 | 0.275713363 |
| UBA5       | 3q22.1             | 0.069752 | 0.173676 | 0.275742222 |
| PHLDA2     | 11p15.4            | 0.069736 | 0.173776 | 0.275878886 |
| RAB40A     | Xq22.2             | -0.06971 | 0.173965 | 0.276157276 |
| SERPINA5   | 14q32.13           | -0.06969 | 0.174082 | 0.276321598 |
| NPL        | 1q25.3             | 0.069682 | 0.174109 | 0.276342065 |
| NOXRED1    | 14q24.3            | -0.06967 | 0.174196 | 0.276448555 |
| CELSR2     | 1p13.3             | -0.06967 | 0.174204 | 0.276448555 |
| KRTAP12-4  | 21q22.3            | 0.069659 | 0.174255 | 0.276508572 |
| ROGDI      | 16p13.3            | -0.06965 | 0.174293 | 0.276546602 |
| ARHGAP35   | 19q13.32           | 0.06965  | 0.174308 | 0.276547986 |
| B4GAT1     | 11q13.2            | -0.06961 | 0.174528 | 0.276875612 |
| TRMT10C    | 3q12.3             | -0.0696  | 0.174598 | 0.276963896 |
| HEATR5B    | 2p22.2             | 0.069539 | 0.174996 | 0.277574155 |
| LINC00905  | 19p13.12           | -0.06953 | 0.175053 | 0.277642075 |
| LIG1       | 19q13.33           | 0.069525 | 0.175085 | 0.277665335 |
| ZBTB37     | 1q25.1             | 0.069523 | 0.175095 | 0.277665335 |
| NKIRAS1    | 3p24.2             | -0.06952 | 0.175115 | 0.277675204 |
| BTBD8      | 1p22.1             | 0.069509 | 0.175184 | 0.277762366 |
| PSMC4      | 19q13.2            | -0.06949 | 0.175274 | 0.277881876 |
| BET1L      | 11p15.5            | 0.069491 | 0.175295 | 0.277893875 |
| COX7B      | Xq21.1             | -0.06947 | 0.175437 | 0.278097155 |
| PDZD8      | 10q25.3-q26.11     | 0.069461 | 0.175481 | 0.2781453   |
| FOLR2      | 11q13.4            | 0.069444 | 0.175591 | 0.278297656 |
| PCGF5      | 10q23.32           | 0.069435 | 0.175645 | 0.278360714 |
| FAM24A     | 10q26.13           | -0.06943 | 0.175672 | 0.278380622 |
| ACTB       | 7p22.1             | 0.069427 | 0.175695 | 0.278395371 |
| TAF4B      | 18q11.2            | -0.0694  | 0.175895 | 0.278690432 |
| ZNF711     | Xq21.1             | -0.06939 | 0.175953 | 0.278759936 |

|           |                |          |          |             |
|-----------|----------------|----------|----------|-------------|
| MIA       | 19q13.2        | 0.06937  | 0.17605  | 0.278891279 |
| IGDCC4    | 15q22.31       | -0.06936 | 0.176115 | 0.278973537 |
| CA5A      | 16q24.2        | -0.06936 | 0.176136 | 0.27898408  |
| PYGB      | 20p11.21       | 0.069345 | 0.176205 | 0.27907216  |
| WNT9B     | 17q21.32       | -0.06932 | 0.17635  | 0.279278713 |
| SNORA58   | 3q22.1         | 0.069315 | 0.176395 | 0.27932856  |
| ZBTB4     | 17p13.1        | 0.069308 | 0.176437 | 0.27937258  |
| RAPGEF1   | 9q34.13        | 0.069298 | 0.176502 | 0.27945286  |
| FOXN1     | 17q11.2        | 0.069262 | 0.176728 | 0.279779935 |
| SOX18     | 20q13.33       | -0.06926 | 0.176736 | 0.279779935 |
| UBE4B     | 1p36.22        | 0.069229 | 0.176933 | 0.280069591 |
| ANKLE2    | 12q24.33       | -0.06922 | 0.177006 | 0.280162824 |
| MAS1L     | 6p22.1         | 0.069207 | 0.177073 | 0.280237998 |
| HGFAC     | 4p16.3         | 0.069202 | 0.177103 | 0.280237998 |
| SNORA79   | 14q31.1        | -0.0692  | 0.177107 | 0.280237998 |
| LSMEM2    | 3p21.31        | -0.0692  | 0.17711  | 0.280237998 |
| PDLIM2    | 8p21.3         | -0.06918 | 0.177223 | 0.280393289 |
| MPRIP     | 17p11.2        | 0.069181 | 0.177236 | 0.280393289 |
| FUBP3     | 9q34.11-q34.12 | -0.06917 | 0.177317 | 0.280499422 |
| LRP5L     | 22q11.23       | -0.06916 | 0.177344 | 0.280512847 |
| MAPK8IP2  | 22q13.33       | -0.06916 | 0.177353 | 0.280512847 |
| CAPNS1    | 19q13.12       | 0.06915  | 0.17743  | 0.280612592 |
| GNAO1     | 16q13          | -0.06912 | 0.177635 | 0.280902039 |
| ZNF519    | 18p11.21       | 0.069116 | 0.177641 | 0.280902039 |
| FKBP1AP1  | 19q13.43       | -0.06911 | 0.177667 | 0.280920491 |
| RPS2      | 16p13.3        | -0.06911 | 0.177689 | 0.280922493 |
| C9        | 5p13.1         | 0.069107 | 0.1777   | 0.280922493 |
| ERCC8     | 5q12.1         | -0.06911 | 0.17771  | 0.280922493 |
| RFK       | 9q21.13        | -0.0691  | 0.177732 | 0.280925843 |
| CCDC152   | 5p12           | 0.069097 | 0.177762 | 0.280925843 |
| PLXNA1    | 3q21.3         | -0.0691  | 0.177765 | 0.280925843 |
| ERBB3     | 12q13.2        | 0.069096 | 0.177769 | 0.280925843 |
| LRRC6     | 8q24.22        | 0.069078 | 0.17788  | 0.281063411 |
| INHBE     | 12q13.3        | -0.06908 | 0.177884 | 0.281063411 |
| AADAC     | 3q25.1         | 0.069056 | 0.178023 | 0.281260503 |
| FAM43A    | 3q29           | -0.06902 | 0.178232 | 0.281569632 |
| RAC3      | 17q25.3        | 0.068997 | 0.178391 | 0.281798295 |
| TSPY3     | Yp11.2         | 0.068991 | 0.178431 | 0.281821371 |
| KLLN      | 10q23.31       | 0.068991 | 0.178434 | 0.281821371 |
| RSPO2     | 8q23.1         | -0.06898 | 0.178485 | 0.281879209 |
| PYROXD2   | 10q24.2        | 0.068965 | 0.178594 | 0.282029041 |
| EVX2      | 2q31.1         | -0.06894 | 0.178777 | 0.282296778 |
| KRTAP12-2 | 21q22.3        | -0.06893 | 0.178825 | 0.282340849 |
| CNGB3     | 8q21.3         | -0.06893 | 0.178833 | 0.282340849 |
| EGR2      | 10q21.3        | -0.06892 | 0.178853 | 0.282350102 |
| WBP2      | 17q25.1        | 0.068887 | 0.179086 | 0.282681566 |
| ECT2      | 3q26.31        | 0.068886 | 0.179091 | 0.282681566 |
| CDH19     | 18q22.1        | -0.06888 | 0.179121 | 0.282706246 |
| TESK2     | 1p34.1         | 0.068861 | 0.179255 | 0.282894996 |
| CLDN19    | 1p34.2         | -0.06885 | 0.179335 | 0.282998955 |
| ARHGAP36  | Xq26.1         | -0.06884 | 0.17938  | 0.283048575 |
| TMEM257   | Xq27.3         | 0.068838 | 0.179396 | 0.283050727 |
| IFIT1B    | 10q23.31       | 0.068835 | 0.17942  | 0.283058646 |
| GLRX3     | 10q26.3        | -0.06883 | 0.179438 | 0.283058646 |
| C21ORF91  | 21q21.1        | -0.06883 | 0.179447 | 0.283058646 |
| LAIR1     | 19q13.42       | 0.068828 | 0.179464 | 0.283058646 |
| GSAP      | 7q11.23        | -0.06883 | 0.179472 | 0.283058646 |
| NSG2      | 5q35.2         | -0.06882 | 0.179527 | 0.283102263 |



|           |              |          |          |             |
|-----------|--------------|----------|----------|-------------|
| GTF2B     | 1p22.2       | 0.068818 | 0.179528 | 0.283102263 |
| EFCAB11   | 14q32.11     | -0.06881 | 0.179562 | 0.283133756 |
| RTN4IP1   | 6q21         | -0.0688  | 0.179644 | 0.283240563 |
| MKRN2     | 3p25.2       | -0.06879 | 0.179697 | 0.283302196 |
| PABPC1L2A | Xq13.2       | 0.068782 | 0.179751 | 0.283364886 |
| UGT3A1    | 5p13.2       | -0.06877 | 0.179807 | 0.283431818 |
| ANKRD55   | 5q11.2       | 0.068757 | 0.179914 | 0.283577924 |
| IFNW1     | 9p21.3       | 0.068747 | 0.179974 | 0.283650177 |
| AKAP2     | 9q31.3       | -0.06874 | 0.179989 | 0.283651418 |
| WIPF3     | 7p14.3       | -0.06874 | 0.180007 | 0.283657535 |
| SGF29     | 16p11.2      | -0.06874 | 0.180023 | 0.28366063  |
| VAMP1     | 12p13.31     | 0.068731 | 0.180077 | 0.283722322 |
| IGF2R     | 6q25.3       | -0.06872 | 0.18012  | 0.283768941 |
| YWHAZ     | 8q22.3       | -0.06871 | 0.180212 | 0.283890989 |
| UQCRHL    | 1p36.21      | 0.0687   | 0.180275 | 0.283965431 |
| NKAIN2    | 6q22.31      | -0.0687  | 0.180288 | 0.283965431 |
| HAPLN1    | 5q14.3       | -0.06869 | 0.180348 | 0.284038424 |
| LINC00917 | 16q24.1      | -0.06868 | 0.180378 | 0.284063615 |
| SOD3      | 4p15.2       | 0.068667 | 0.180484 | 0.28420108  |
| ZNF124    | 1q44         | -0.06867 | 0.180494 | 0.28420108  |
| ADRB3     | 8p11.23      | -0.06866 | 0.180524 | 0.284226468 |
| ARPP19    | 15q21.2      | 0.068656 | 0.180554 | 0.284251286 |
| ELAVL4    | 1p33-p32.3   | 0.06864  | 0.180655 | 0.284386854 |
| KRR1      | 12q21.2      | -0.0686  | 0.180935 | 0.284806578 |
| P2RY4     | Xq13.1       | 0.068587 | 0.180995 | 0.284877612 |
| HIC1      | 17p13.3      | -0.06857 | 0.181117 | 0.285031061 |
| FLCN      | 17p11.2      | 0.068567 | 0.181121 | 0.285031061 |
| CASC10    | 10p12.31     | -0.06855 | 0.181222 | 0.285148161 |
| PRAMEF4   | 1p36.21      | 0.068549 | 0.181235 | 0.285148161 |
| MZT2A     | 2q21.1       | -0.06855 | 0.181246 | 0.285148161 |
| TTC36     | 11q23.3      | -0.06855 | 0.181255 | 0.285148161 |
| PCDHGA9   | 5q31.3       | 0.068544 | 0.181266 | 0.285148161 |
| LINC00937 | 12p13.31     | -0.06853 | 0.181353 | 0.285254677 |
| IFFO1     | 12p13.31     | -0.06853 | 0.181363 | 0.285254677 |
| PITPNB    | 22q12.1      | -0.06851 | 0.181464 | 0.285358275 |
| TEX2      | 17q23.3      | -0.06851 | 0.18147  | 0.285358275 |
| UBA1      | Xp11.3       | -0.06851 | 0.181471 | 0.285358275 |
| LINC00698 | 3p14.2       | -0.0685  | 0.181572 | 0.285493795 |
| CCNYL1    | 2q33.3       | 0.068494 | 0.181588 | 0.285497288 |
| ACOT1     | 14q24.3      | -0.06848 | 0.181644 | 0.285539631 |
| RPL18     | 19q13.33     | -0.06848 | 0.181646 | 0.285539631 |
| FIBCD1    | 9q34.12      | 0.068483 | 0.181658 | 0.285539631 |
| ASH1L     | 1q22         | 0.068476 | 0.181705 | 0.285591511 |
| EIF2AK2   | 2p22.2       | -0.06844 | 0.18195  | 0.285951285 |
| ESR1      | 6q25.1-q25.2 | 0.068435 | 0.181963 | 0.285951285 |
| TEX44     | 2q37.1       | -0.06843 | 0.182007 | 0.285999186 |
| SLCO6A1   | 5q21.1       | -0.06842 | 0.18204  | 0.286015312 |
| TEX19     | 17q25.3      | -0.06842 | 0.182046 | 0.286015312 |
| KRT33B    | 17q21.2      | -0.06841 | 0.182096 | 0.286053598 |
| ZRANB1    | 10q26.13     | -0.06841 | 0.182099 | 0.286053598 |
| CT45A1    | Xq26.3       | -0.0684  | 0.182169 | 0.286118706 |
| PUS7L     | 12q12        | -0.0684  | 0.182176 | 0.286118706 |
| TRPM5     | 11p15.5      | 0.068401 | 0.182183 | 0.286118706 |
| FAM76A    | 1p35.3       | 0.068377 | 0.182335 | 0.286334271 |
| BEND3P3   | 10q22.3      | 0.068359 | 0.182449 | 0.28649129  |
| SPART     | 13q13.3      | -0.06836 | 0.182465 | 0.28649129  |
| UNC5C     | 4q22.3       | 0.068354 | 0.182485 | 0.28649129  |
| TLX1      | 10q24.31     | -0.06835 | 0.182492 | 0.28649129  |

|           |          |          |          |             |
|-----------|----------|----------|----------|-------------|
| DNAH6     | 2p11.2   | -0.06834 | 0.182567 | 0.286586153 |
| AGTR2     | Xq23     | -0.06834 | 0.182597 | 0.286597995 |
| RASGEF1C  | 5q35.3   | 0.068335 | 0.182603 | 0.286597995 |
| EDF1      | 9q34.3   | 0.068331 | 0.182632 | 0.286620677 |
| ARL17A    | 17q21.31 | -0.06833 | 0.182666 | 0.286649482 |
| ADGRE2    | 19p13.12 | 0.068324 | 0.182679 | 0.286649482 |
| FMO6P     | 1q24.3   | -0.06831 | 0.182794 | 0.286807322 |
| CSAG1     | Xq28     | -0.0683  | 0.182835 | 0.286849597 |
| SNAPIN    | 1q21.3   | -0.06829 | 0.182866 | 0.286875944 |
| POU2F2    | 19q13.2  | 0.068291 | 0.182889 | 0.286889307 |
| LRCH3     | 3q29     | 0.068285 | 0.182927 | 0.286898803 |
| CWH43     | 4p11     | 0.068284 | 0.182933 | 0.286898803 |
| TIFAB     | 5q31.1   | 0.068283 | 0.182938 | 0.286898803 |
| SPICE1    | 3q13.2   | 0.068272 | 0.183012 | 0.286992529 |
| PLCXD3    | 5p13.1   | 0.068269 | 0.183026 | 0.286992576 |
| PTCH2     | 1p34.1   | -0.06827 | 0.183053 | 0.287011564 |
| FKBP3     | 14q21.2  | -0.06826 | 0.183084 | 0.287037957 |
| GRK1      | 13q34    | -0.06826 | 0.183101 | 0.287042699 |
| TUG1      | 22q12.2  | -0.06825 | 0.18315  | 0.287097184 |
| MIPEP     | 13q12.12 | -0.06824 | 0.183221 | 0.287185408 |
| RIC3      | 11p15.4  | -0.06822 | 0.183334 | 0.287327164 |
| DOK4      | 16q21    | 0.068221 | 0.18334  | 0.287327164 |
| USP21     | 1q23.3   | -0.06822 | 0.183372 | 0.287354625 |
| CTTNBP2NL | 1p13.2   | 0.068201 | 0.183465 | 0.287477654 |
| TANGO2    | 22q11.21 | 0.06818  | 0.183605 | 0.287674602 |
| ADGRL4    | 1p31.1   | -0.06813 | 0.183899 | 0.28811307  |
| CACNA1E   | 1q25.3   | -0.06813 | 0.183948 | 0.288166249 |
| YPEL2     | 17q22    | 0.068115 | 0.184023 | 0.288261652 |
| PCDHB17P  | 5q31.3   | -0.06811 | 0.184046 | 0.288270811 |
| TMEM213   | 7q34     | 0.068109 | 0.184057 | 0.288270811 |
| AQR       | 15q14    | 0.068091 | 0.184173 | 0.288420712 |
| PASD1     | Xq28     | -0.06809 | 0.184182 | 0.288420712 |
| FIRRE     | Xq26.2   | -0.06808 | 0.18427  | 0.288518165 |
| PGR       | 11q22.1  | -0.06808 | 0.184273 | 0.288518165 |
| TNRC18    | 7p22.1   | -0.06807 | 0.184293 | 0.288522079 |
| NEUROD6   | 7p14.3   | -0.06807 | 0.184304 | 0.288522079 |
| CCDC191   | 3q13.31  | -0.06805 | 0.184451 | 0.288729313 |
| FRY       | 13q13.1  | 0.068045 | 0.184476 | 0.288745961 |
| OR10H5    | 19p13.12 | -0.06804 | 0.184533 | 0.288812991 |
| LAMB3     | 1q32.2   | 0.068028 | 0.184585 | 0.28885858  |
| FGF22     | 19p13.3  | 0.068027 | 0.184591 | 0.28885858  |
| TTYH2     | 17q25.1  | -0.06802 | 0.18461  | 0.288864863 |
| KCNE5     | Xq23     | -0.06802 | 0.184638 | 0.28888626  |
| SNAR-G2   | 19q13.33 | -0.06802 | 0.184653 | 0.288888022 |
| VAMP8     | 2p11.2   | -0.06799 | 0.184799 | 0.289093578 |
| ZFPM1     | 16q24.2  | 0.067973 | 0.184937 | 0.289286888 |
| GPR149    | 3q25.2   | 0.067963 | 0.185007 | 0.28937295  |
| SCGB1D2   | 11q12.3  | -0.06796 | 0.185046 | 0.289402349 |
| ANKRD36   | 2q11.2   | -0.06796 | 0.185055 | 0.289402349 |
| NUP214    | 9q34.13  | 0.067951 | 0.18508  | 0.289419023 |
| RALA      | 7p14.1   | -0.06795 | 0.185098 | 0.289419648 |
| EMC6      | 17p13.2  | 0.067947 | 0.185109 | 0.289419648 |
| GNG8      | 19q13.32 | -0.06793 | 0.185197 | 0.28953547  |
| LINC02145 | 5p15.31  | -0.06792 | 0.185277 | 0.289636459 |
| ZBTB21    | 21q22.3  | 0.067912 | 0.185335 | 0.289684327 |
| TREML4    | 6p21.1   | 0.067912 | 0.185336 | 0.289684327 |
| TMEM141   | 9q34.3   | 0.067887 | 0.185494 | 0.289909116 |
| NUP62CL   | Xq22.3   | 0.067868 | 0.185617 | 0.290044676 |

|             |               |          |          |             |
|-------------|---------------|----------|----------|-------------|
| WAPL        | 10q23.2       | 0.067867 | 0.185624 | 0.290044676 |
| SLC16A11    | 17p13.1       | -0.06787 | 0.185633 | 0.290044676 |
| HSD11B1     | 1q32.2        | -0.06787 | 0.185639 | 0.290044676 |
| PCDHGA2     | 5q31.3        | -0.06786 | 0.185689 | 0.290083577 |
| SERBP1      | 1p31.3        | 0.067857 | 0.185693 | 0.290083577 |
| WSB1        | 17q11.1       | -0.06785 | 0.185766 | 0.290167244 |
| BCL6        | 3q27.3        | 0.067844 | 0.185775 | 0.290167244 |
| DCX         | Xq23          | -0.06782 | 0.185916 | 0.290363667 |
| ZNF644      | 1p22.2        | 0.067787 | 0.186148 | 0.290689717 |
| PLEC        | 8q24.3        | 0.067786 | 0.186153 | 0.290689717 |
| PCCA        | 13q32.3       | 0.06778  | 0.186191 | 0.290726131 |
| TMEM205     | 19p13.2       | -0.06775 | 0.18641  | 0.291044957 |
| C3P1        | 19p13.2       | -0.06774 | 0.186431 | 0.291051998 |
| SERPINB10   | 18q22.1       | -0.06774 | 0.186444 | 0.291051998 |
| ZNF197      | 3p21.31       | -0.06773 | 0.186539 | 0.291178386 |
| NOL12       | 22q13.1       | -0.06772 | 0.186612 | 0.291258483 |
| MAD2L1      | 4q27          | 0.067714 | 0.186621 | 0.291258483 |
| FABP4       | 8q21.13       | -0.06771 | 0.186644 | 0.291258483 |
| EXOC3       | 5p15.33       | -0.06771 | 0.186649 | 0.291258483 |
| AEBP2       | 12p12.3       | -0.06769 | 0.186763 | 0.291401531 |
| BAZ1A       | 14q13.1-q13.2 | 0.067691 | 0.186769 | 0.291401531 |
| CFAP52      | 17p13.1       | -0.06767 | 0.186885 | 0.291559551 |
| CFTR        | 7q31.2        | -0.06766 | 0.186946 | 0.291632324 |
| LHX5        | 12q24.13      | -0.06766 | 0.186988 | 0.291670218 |
| PAQR3       | 4q21.21       | 0.067656 | 0.187    | 0.291670218 |
| GIMAP1      | 7q36.1        | 0.06765  | 0.187042 | 0.29171329  |
| MCF2L       | 13q34         | -0.06763 | 0.187157 | 0.291870432 |
| RUVBL2      | 19q13.33      | -0.06761 | 0.187302 | 0.292073723 |
| UNC79       | 14q32.12      | -0.06759 | 0.187453 | 0.292286191 |
| FAM110D     | 1p36.11       | -0.06756 | 0.187614 | 0.292513553 |
| NSA2        | 5q13.3        | 0.067558 | 0.18764  | 0.292532529 |
| UROC1       | 3q21.3        | -0.06753 | 0.187812 | 0.292777535 |
| LINC00635   | 3q13.12       | 0.067528 | 0.187839 | 0.292779809 |
| CHRNB4      | 15q25.1       | -0.06753 | 0.187843 | 0.292779809 |
| PTGFR       | 1p31.1        | -0.06752 | 0.18786  | 0.292784297 |
| GPR27       | 3p13          | 0.067519 | 0.187897 | 0.292819465 |
| TSR3        | 16p13.3       | -0.06751 | 0.187924 | 0.292837667 |
| DNASE1L1    | Xq28          | -0.06749 | 0.188092 | 0.293060402 |
| TMEM51-AS1  | 1p36.21       | -0.06749 | 0.188096 | 0.293060402 |
| CREB1       | 2q33.3        | -0.06746 | 0.188282 | 0.293328076 |
| BIN3-IT1    | 8p21.3        | 0.06744  | 0.188413 | 0.293490791 |
| PARD6G-AS1  | 18q23         | 0.067438 | 0.188429 | 0.293490791 |
| XIAP        | Xq25          | -0.06744 | 0.188431 | 0.293490791 |
| PPP2R5B     | 11q13.1       | 0.067427 | 0.1885   | 0.293575876 |
| RHNO1       | 12p13.33      | -0.0674  | 0.188647 | 0.293782158 |
| RANBP10     | 16q22.1       | -0.0674  | 0.188691 | 0.293814391 |
| OR1D2       | 17p13.3       | 0.067397 | 0.188697 | 0.293814391 |
| MAP3K15     | Xp22.12       | 0.067377 | 0.18883  | 0.293998329 |
| EPHA7       | 6q16.1        | -0.06737 | 0.188874 | 0.294044451 |
| TMEM72      | 10q11.21      | 0.067356 | 0.188971 | 0.294169714 |
| AMIGO1      | 1p13.3        | 0.067353 | 0.188984 | 0.294169714 |
| MAP3K14-AS1 | 17q21.31      | -0.06734 | 0.189043 | 0.294238233 |
| DCDC2B      | 1p35.2        | 0.067339 | 0.189077 | 0.294267976 |
| REXO1L6P    | 8q21.2        | 0.067287 | 0.189423 | 0.294773397 |
| ARHGEF6     | Xq26.3        | 0.067286 | 0.189431 | 0.294773397 |
| PARP2       | 14q11.2       | -0.06728 | 0.189474 | 0.294816754 |
| ALOX15      | 17p13.2       | -0.06727 | 0.189503 | 0.29484039  |
| UBTD2       | 5q35.1        | 0.06725  | 0.189665 | 0.295069204 |

|           |               |          |          |             |
|-----------|---------------|----------|----------|-------------|
| FGFBP3    | 10q23.32      | 0.067233 | 0.18978  | 0.295206291 |
| TCHHL1    | 1q21.3        | -0.06723 | 0.189783 | 0.295206291 |
| TMEM119   | 12q23.3       | -0.06723 | 0.189827 | 0.295252428 |
| GLB1      | 3p22.3        | -0.06722 | 0.189893 | 0.295321543 |
| GORAB     | 1q24.2        | 0.067214 | 0.189901 | 0.295321543 |
| SOX14     | 3q22.3        | -0.06721 | 0.189949 | 0.295372874 |
| FHL1      | Xq26.3        | -0.0672  | 0.189994 | 0.295419384 |
| FGB       | 4q31.3        | -0.06715 | 0.190337 | 0.295897165 |
| YIF1B     | 19q13.2       | 0.067148 | 0.190338 | 0.295897165 |
| GBE1      | 3p12.2        | 0.067147 | 0.190345 | 0.295897165 |
| PIK3R1    | 5q13.1        | -0.06711 | 0.190596 | 0.296264055 |
| ZNF385A   | 12q13.13      | -0.06709 | 0.190702 | 0.296405079 |
| ABCA4     | 1p22.1        | 0.067071 | 0.190851 | 0.296614792 |
| BTAF1     | 10q23.32      | 0.067055 | 0.190958 | 0.296758254 |
| STK32A    | 5q32          | -0.06705 | 0.191007 | 0.296810883 |
| ADRB2     | 5q32          | 0.067037 | 0.191076 | 0.29689519  |
| KLK8      | 19q13.41      | -0.06703 | 0.191116 | 0.296916889 |
| SYPL1     | 7q22.3        | 0.06703  | 0.19112  | 0.296916889 |
| CLIP4     | 2p23.2        | -0.06702 | 0.191173 | 0.296975978 |
| ARL13B    | 3q11.1-q11.2  | -0.06701 | 0.191224 | 0.297032855 |
| OR2H2     | 6p22.1        | -0.067   | 0.191289 | 0.297110299 |
| SLC13A4   | 7q33          | -0.067   | 0.191331 | 0.297153507 |
| ATP5ME    | 4p16.3        | 0.066989 | 0.191393 | 0.297225736 |
| LRIG2     | 1p13.2        | 0.066972 | 0.191507 | 0.297374383 |
| HIST1H3F  | 6p22.2        | -0.06697 | 0.191518 | 0.297374383 |
| KRTAP5-2  | 11p15.5       | 0.066965 | 0.191552 | 0.297400047 |
| RPS10P7   | 1q32.1        | 0.066963 | 0.191564 | 0.297400047 |
| CELA3A    | 1p36.12       | 0.066961 | 0.191583 | 0.297406448 |
| D2HGDH    | 2q37.3        | -0.06695 | 0.191664 | 0.297498795 |
| PDZD3     | 11q23.3       | 0.066947 | 0.191673 | 0.297498795 |
| SLC9A7    | Xp11.3 Xp11.3 | 0.066945 | 0.191687 | 0.297498795 |
| PDGFD     | 11q22.3       | -0.06694 | 0.191736 | 0.297510824 |
| PSMG3     | 7p22.3        | -0.06694 | 0.191739 | 0.297510824 |
| TRIM49D2  | 11q14.3       | -0.06694 | 0.19174  | 0.297510824 |
| PAXX      | 9q34.3        | -0.06693 | 0.191786 | 0.297558905 |
| DNALI1    | 1p34.3        | -0.06692 | 0.191825 | 0.297597    |
| PWAR5     | 15q11.2       | -0.06689 | 0.192024 | 0.297863145 |
| ZNF329    | 19q13.43      | -0.06689 | 0.192041 | 0.297863145 |
| PIDD1     | 11p15.5       | -0.06689 | 0.192064 | 0.297863145 |
| RPL23AP64 | 11q23.3       | -0.06689 | 0.192081 | 0.297863145 |
| NFATC3    | 16q22.1       | 0.066885 | 0.192083 | 0.297863145 |
| TMEM266   | 15q24.2       | -0.06689 | 0.192086 | 0.297863145 |
| ADM5      | 19q13.33      | 0.066866 | 0.192212 | 0.298035783 |
| DMAC2L    | 14q21.3       | 0.066861 | 0.192249 | 0.298070618 |
| KAT6A     | 8p11.21       | 0.06682  | 0.192518 | 0.298458671 |
| FABP1     | 2p11.2        | 0.066818 | 0.192532 | 0.298458671 |
| ARL6IP1   | 16p12.3       | 0.066816 | 0.192547 | 0.298458671 |
| CYP26C1   | 10q23.33      | -0.06681 | 0.192564 | 0.298458671 |
| TMEM31    | Xq22.2        | -0.06681 | 0.192574 | 0.298458671 |
| CLEC18B   | 16q23.1       | 0.066804 | 0.192625 | 0.298513767 |
| FAM138B   | 2q14.1        | -0.06679 | 0.192686 | 0.298586401 |
| OR2F1     | 7q35          | -0.06679 | 0.192719 | 0.298613762 |
| BTN1A1    | 6p22.2        | -0.06677 | 0.192844 | 0.298783619 |
| ZNF284    | 19q13.31      | -0.06677 | 0.192866 | 0.298794708 |
| SLC17A7   | 19q13.33      | -0.06674 | 0.193073 | 0.29909216  |
| FNDC8     | 17q12         | -0.06673 | 0.193097 | 0.299107339 |
| BMP5      | 6p12.1        | 0.066729 | 0.19313  | 0.299134449 |
| CXORF51A  | Xq27.3        | -0.0667  | 0.193324 | 0.299392589 |

|           |                |          |          |              |
|-----------|----------------|----------|----------|--------------|
| NOMO3     | 16p13.11       | -0.0667  | 0.193335 | 0.299392589  |
| HCAR2     | 12q24.31       | -0.0667  | 0.193341 | 0.299392589  |
| SCARNA23  | Xp22.11        | -0.06669 | 0.193388 | 0.299441339  |
| ATP5F1C   | 10p14          | 0.066678 | 0.193472 | 0.299548446  |
| FAM163A   | 1q25.2         | -0.06667 | 0.1935   | 0.299569291  |
| PAQR6     | 1q22           | 0.066662 | 0.193573 | 0.299658367  |
| TOGARAM1  | 14q21.2        | -0.06666 | 0.193591 | 0.299664224  |
| DAZL      | 3p24.3         | -0.06665 | 0.193634 | 0.299707195  |
| MRPS7     | 17q25.1        | -0.06663 | 0.193765 | 0.299885826  |
| RNF157    | 17q25.1        | -0.06663 | 0.193808 | 0.299929654  |
| NDUFAF1   | 15q15.1        | 0.066618 | 0.193871 | 0.300004761  |
| CCDC102B  | 18q22.1-q22.2  | -0.06661 | 0.193906 | 0.300035158  |
| MMADHC    | 2q23.2         | -0.0666  | 0.194006 | 0.300166183  |
| GLI1      | 12q13.3        | -0.06659 | 0.194063 | 0.300232387  |
| OR7E5P    | 11q12.1        | -0.06658 | 0.194109 | 0.300260094  |
| OR10W1    | 11q12.1        | 0.066582 | 0.194111 | 0.300260094  |
| NHLH1     | 1q23.2         | -0.06657 | 0.194172 | 0.300330304  |
| HIST1H2BH | 6p22.2         | -0.06655 | 0.194358 | 0.300594958  |
| VENTXP7   | 3p24.3         | -0.06654 | 0.194426 | 0.300677447  |
| GKN2      | 2p13.3         | 0.066526 | 0.19449  | 0.300753023  |
| AOC4P     | 17q21.31       | -0.06652 | 0.194527 | 0.300786741  |
| NRAS      | 1p13.2         | -0.06652 | 0.194559 | 0.300813816  |
| POU6F1    | 12q13.13       | -0.0665  | 0.19464  | 0.300915922  |
| RPL13A    | 19q13.33       | -0.0665  | 0.194681 | 0.300941594  |
| TSHR      | 14q31.1        | 0.066496 | 0.194687 | 0.300941594  |
| OR6C3     | 12q13.2        | -0.06648 | 0.194821 | 0.301124704  |
| LRRC34    | 3q26.2         | -0.06644 | 0.19509  | 0.301498501  |
| SYTL3     | 6q25.3         | 0.066436 | 0.195093 | 0.301498501  |
| WDR19     | 4p14           | -0.06642 | 0.195193 | 0.301606069  |
| PTH2      | 19q13.33       | 0.06642  | 0.195203 | 0.301606069  |
| CACNG6    | 19q13.42       | 0.066419 | 0.195207 | 0.301606069  |
| MIEN1     | 17q12          | -0.06641 | 0.195239 | 0.301631828  |
| SLC18A3   | 10q11.23       | -0.0664  | 0.19534  | 0.30176141   |
| EDN2      | 1p34.2         | 0.066398 | 0.195353 | 0.30176141   |
| KRT6C     | 12q13.13       | -0.06637 | 0.195562 | 0.302060395  |
| HDGFL2    | 19p13.3        | -0.06636 | 0.195622 | 0.302121026  |
| ZNF615    | 19q13.41       | -0.06636 | 0.195631 | 0.302121026  |
| ZBTB34    | 9q33.3         | -0.06633 | 0.1958   | 0.302358122  |
| SLC25A22  | 11p15.5        | 0.066325 | 0.195845 | 0.30240442   |
| HLA-J     | 6p22.1         | 0.066294 | 0.196053 | 0.302702336  |
| SEMA3C    | 7q21.11        | -0.06629 | 0.196075 | 0.302712708  |
| KRT18P55  | 17q11.2        | 0.066279 | 0.196154 | 0.302812047  |
| C1ORF87   | 1p32.1         | -0.06627 | 0.19622  | 0.302889978  |
| HRH4      | 18q11.2        | 0.066218 | 0.19657  | 0.303407107  |
| OR51L1    | 11p15.4        | -0.0662  | 0.196665 | 0.303529912  |
| SNORA50A  | 16q21          | 0.066195 | 0.196724 | 0.303598508  |
| TPM3P9    | 19q13.42       | -0.06619 | 0.19677  | 0.303645583  |
| ARMC3     | 10p12.2        | -0.06618 | 0.196794 | 0.303658536  |
| SNCA      | 4q22.1         | -0.06617 | 0.196865 | 0.303745143  |
| TRADD     | 16q22.1        | 0.066153 | 0.197008 | 0.303942563  |
| UBE3A     | 15q11.2        | 0.066147 | 0.19705  | 0.303984502  |
| AIF1L     | 9q34.12-q34.13 | 0.066135 | 0.197132 | 0.304087302  |
| TMEM247   | 2p21           | -0.06611 | 0.197288 | 0.304303758  |
| KRTAP13-4 | 21q22.11       | -0.0661  | 0.197389 | 0.3044335976 |
| PRSS40A   | 2q21.1         | -0.06609 | 0.197467 | 0.304533636  |
| IFT122    | 3q21.3-q22.1   | 0.066075 | 0.197536 | 0.304616066  |
| H2BFM     | Xq22.2         | -0.06606 | 0.197646 | 0.304732146  |
| TMPRSS11B | 4q13.2         | -0.06606 | 0.197649 | 0.304732146  |

|           |             |          |          |             |
|-----------|-------------|----------|----------|-------------|
| RRM2B     | 8q22.3      | -0.06606 | 0.197665 | 0.304732146 |
| TANK      | 2q24.2      | 0.066055 | 0.197672 | 0.304732146 |
| TMCO1     | 1q24.1      | 0.066049 | 0.197711 | 0.304761982 |
| LYSMD2    | 15q21.2     | 0.066048 | 0.197722 | 0.304761982 |
| C9ORF170  | 9q21.33     | -0.06602 | 0.197917 | 0.305038938 |
| LPCAT3    | 12p13.31    | 0.066013 | 0.197958 | 0.305078611 |
| DAB2      | 5p13.1      | -0.06601 | 0.197991 | 0.305107092 |
| MEX3C     | 18q21.2     | 0.065965 | 0.198288 | 0.30554016  |
| GPR4      | 19q13.32    | -0.06595 | 0.198371 | 0.305635618 |
| SNHG29    | 17p11.2     | 0.065951 | 0.19838  | 0.305635618 |
| PURG      | 8p12        | -0.06594 | 0.198466 | 0.30574386  |
| THUMPD3   | 3p25.3      | -0.06593 | 0.198495 | 0.305765029 |
| ZNF689    | 16p11.2     | -0.06593 | 0.198533 | 0.305800333 |
| CCDC166   | 8q24.3      | 0.065924 | 0.198569 | 0.305832553 |
| FAM224B   | Yq11.222    | -0.0659  | 0.198734 | 0.306063607 |
| KRTAP5-5  | 11p15.5     | -0.06589 | 0.198785 | 0.306118644 |
| GPR176    | 15q14-q15.1 | -0.06589 | 0.198802 | 0.306120401 |
| ZMAT1     | Xq22.1      | -0.06587 | 0.198909 | 0.306262162 |
| PRDX1     | 1p34.1      | -0.06586 | 0.198972 | 0.306336006 |
| P2RX2     | 12q24.33    | 0.065841 | 0.199133 | 0.306560446 |
| GNL2      | 1p34.3      | -0.06584 | 0.19915  | 0.30656304  |
| CLEC14A   | 14q21.1     | -0.06583 | 0.199195 | 0.306607466 |
| BHLHE22   | 8q12.3      | -0.06583 | 0.199223 | 0.306626964 |
| BIRC5     | 17q25.3     | -0.06581 | 0.199332 | 0.306771142 |
| TMEM79    | 1q22        | -0.06579 | 0.199494 | 0.306997018 |
| RICTOR    | 5p13.1      | -0.06574 | 0.199812 | 0.307463649 |
| LINC00301 | 11q12.2     | 0.065739 | 0.199831 | 0.307469444 |
| SSX2      | Xp11.22     | -0.06573 | 0.199911 | 0.307551747 |
| SERF2     | 15q15.3     | 0.065727 | 0.199916 | 0.307551747 |
| FIG4      | 6q21        | 0.065718 | 0.199973 | 0.307616038 |
| RPS26P11  | Xq13.1      | -0.06572 | 0.199988 | 0.307616038 |
| TEX12     | 11q23.1     | -0.0657  | 0.200072 | 0.307721519 |
| FAM153A   | 5q35.3      | 0.065697 | 0.200117 | 0.307767124 |
| CDC20     | 1p34.2      | 0.06568  | 0.200239 | 0.307931156 |
| RAB9B     | Xq22.2      | -0.06567 | 0.200275 | 0.307963395 |
| S100A9    | 1q21.3      | -0.06567 | 0.200307 | 0.307988427 |
| CNBD1     | 8q21.3      | -0.06567 | 0.200329 | 0.307998605 |
| MYO1F     | 19p13.2     | 0.065659 | 0.200379 | 0.308052489 |
| NLGN4Y    | Yq11.221    | -0.06565 | 0.200468 | 0.30816471  |
| ILF2      | 1q21.3      | -0.06564 | 0.200511 | 0.308207593 |
| MPPED1    | 22q13.2     | 0.065632 | 0.200568 | 0.308266817 |
| GABBR1    | 6p22.1      | -0.06563 | 0.200585 | 0.308266817 |
| MYF5      | 12q21.31    | 0.065628 | 0.200596 | 0.308266817 |
| PDZD2     | 5p13.3      | -0.0656  | 0.200798 | 0.308554284 |
| TBC1D24   | 16p13.3     | 0.065593 | 0.200831 | 0.308580679 |
| ICAM4     | 19p13.2     | -0.06559 | 0.200868 | 0.308613866 |
| HADHA     | 2p23.3      | 0.065572 | 0.200981 | 0.308763233 |
| SLC20A1   | 2q14.1      | 0.065556 | 0.201086 | 0.308901222 |
| ZNF236    | 18q23       | 0.065547 | 0.201151 | 0.308977744 |
| GPX6      | 6p22.1      | -0.06554 | 0.201205 | 0.309037072 |
| SLCO1A2   | 12p12.1     | -0.06553 | 0.201259 | 0.30907978  |
| MAP7      | 6q23.3      | 0.065531 | 0.201264 | 0.30907978  |
| TMTC1     | 12p11.22    | 0.065523 | 0.201319 | 0.309140379 |
| TNFRSF10B | 8p21.3      | 0.065495 | 0.201507 | 0.309406131 |
| FCGR2A    | 1q23.3      | 0.065488 | 0.201558 | 0.309459929 |
| AURKAP1   | 1q41        | -0.06548 | 0.201594 | 0.309491958 |
| MIR155HG  | -           | 0.065461 | 0.201745 | 0.309696452 |
| FAM47C    | Xp21.1      | 0.065459 | 0.201758 | 0.309696452 |

|              |          |          |          |             |
|--------------|----------|----------|----------|-------------|
| RPL18A       | 19p13.11 | -0.06543 | 0.20196  | 0.309970904 |
| EXOC3L2      | 19q13.32 | -0.06543 | 0.201968 | 0.309970904 |
| CSK          | 15q24.1  | 0.065426 | 0.201987 | 0.309976825 |
| PPEF2        | 4q21.1   | -0.06542 | 0.202048 | 0.310046141 |
| GSTK1        | 7q34     | 0.065408 | 0.202106 | 0.310111949 |
| ZNF511       | 10q26.3  | 0.065396 | 0.202194 | 0.310222915 |
| ETFB         | 19q13.41 | 0.065382 | 0.202286 | 0.31034076  |
| OR9I1        | 11q12.1  | 0.065368 | 0.202384 | 0.310466459 |
| GALNT9       | 12q24.33 | 0.06536  | 0.202442 | 0.310531634 |
| HAVCR2       | 5q33.3   | 0.065348 | 0.202528 | 0.310639604 |
| SLC35F6      | 2p23.3   | -0.06534 | 0.202587 | 0.310707252 |
| HIST1H2AJ    | 6p22.1   | 0.065321 | 0.202711 | 0.310873824 |
| GBP1P1       | 1p22.2   | -0.06531 | 0.202795 | 0.310978064 |
| FAM76B       | 11q21    | -0.0653  | 0.202853 | 0.311030548 |
| APPBP2       | 17q23.2  | 0.0653   | 0.20286  | 0.311030548 |
| SDC4P        | 22q12.2  | -0.06527 | 0.203035 | 0.311274594 |
| PRR35        | 16p13.3  | -0.06527 | 0.203054 | 0.311280621 |
| OR4D1        | 17q22    | 0.065267 | 0.203083 | 0.311294427 |
| CLTRN        | Xp22.2   | -0.06527 | 0.203094 | 0.311294427 |
| NAP1L2       | Xq13.2   | -0.06526 | 0.203168 | 0.311383318 |
| HGF          | 7q21.11  | -0.06525 | 0.203215 | 0.311432237 |
| NPFFR2       | 4q13.3   | -0.06524 | 0.20325  | 0.311461447 |
| LOC91450     | 15q24.3  | -0.06524 | 0.203283 | 0.311466141 |
| TBX6         | 16p11.2  | -0.06524 | 0.203284 | 0.311466141 |
| ABITRAM      | 9q31.3   | -0.06523 | 0.203317 | 0.311489167 |
| CCDC155      | 19q13.33 | -0.06523 | 0.20333  | 0.311489167 |
| C1ORF185     | 1p32.3   | -0.06522 | 0.203383 | 0.311545987 |
| VSX2         | 14q24.3  | 0.065216 | 0.203437 | 0.311589259 |
| TIPRL        | 1q24.2   | 0.065214 | 0.203452 | 0.311589259 |
| CPS1-IT1     | 2q34     | 0.065213 | 0.203458 | 0.311589259 |
| ZNF213       | 16p13.3  | -0.0652  | 0.203568 | 0.31173183  |
| INGX         | Xq13.1   | -0.0652  | 0.203582 | 0.31173183  |
| RPTN         | 1q21.3   | -0.06519 | 0.203631 | 0.311783191 |
| EFHB         | 3p24.3   | -0.06518 | 0.203718 | 0.311891601 |
| NUDT18       | 8p21.3   | 0.065173 | 0.203739 | 0.311894749 |
| KCP          | 7q32.1   | -0.06517 | 0.203751 | 0.311894749 |
| RAB32        | 6q24.3   | -0.06514 | 0.203967 | 0.312200959 |
| QRICH1       | 3p21.31  | 0.065122 | 0.204091 | 0.312367436 |
| ARL6         | 3q11.2   | -0.06512 | 0.20414  | 0.312406856 |
| UBE2D2       | 5q31.2   | -0.06511 | 0.204148 | 0.312406856 |
| FBXL19-AS1   | 16p11.2  | -0.06511 | 0.204172 | 0.312419686 |
| NAA15        | 4q31.1   | 0.065098 | 0.204263 | 0.312521056 |
| PPIF         | 10q22.3  | 0.065097 | 0.204269 | 0.312521056 |
| HCAR3        | 12q24.31 | -0.06508 | 0.204356 | 0.31263044  |
| SCFD2        | 4q12     | -0.06508 | 0.204385 | 0.312649983 |
| AP2A1        | 19q13.33 | 0.065076 | 0.204416 | 0.312659596 |
| NFKBIB       | 19q13.2  | -0.06507 | 0.204422 | 0.312659596 |
| SPEF2        | 5p13.2   | 0.065053 | 0.204572 | 0.312855959 |
| C2ORF78      | 2p13.1   | -0.06505 | 0.204582 | 0.312855959 |
| YTHDF2       | 1p35.3   | 0.065048 | 0.20461  | 0.312874862 |
| SPRY1        | 4q28.1   | 0.065043 | 0.204641 | 0.312899187 |
| MASTL        | 10p12.1  | 0.065037 | 0.204683 | 0.312939585 |
| UBTFL1       | 11q14.3  | 0.065033 | 0.204712 | 0.312944579 |
| HNRNPA3P1    | 10q11.21 | -0.06503 | 0.204718 | 0.312944579 |
| ISG20L2      | 1q23.1   | 0.065006 | 0.204901 | 0.313187569 |
| LOC100132831 | Xp11.4   | -0.065   | 0.204912 | 0.313187569 |
| ZNF292       | 6q14.3   | -0.065   | 0.204924 | 0.313187569 |
| AK8          | 9q34.13  | -0.06498 | 0.205086 | 0.313411816 |

|           |              |          |          |             |
|-----------|--------------|----------|----------|-------------|
| EIF3L     | 22q13.1      | 0.064973 | 0.205133 | 0.31345915  |
| IFT22     | 7q22.1       | -0.06496 | 0.205213 | 0.313557063 |
| AAK1      | 2p13.3       | -0.06496 | 0.205241 | 0.313576784 |
| LRIT2     | 10q23.1      | -0.06495 | 0.205302 | 0.313645778 |
| SNRNP40   | 1p35.2       | -0.06493 | 0.205419 | 0.313800314 |
| ZCCHC4    | 4p15.2       | -0.06493 | 0.205453 | 0.313829282 |
| LRFN4     | 11q13.2      | -0.06492 | 0.205512 | 0.313895058 |
| SEPTIN12  | 16p13.3      | -0.06491 | 0.205546 | 0.313917567 |
| ADAMTS13  | 9q34.2       | -0.06491 | 0.205572 | 0.313917567 |
| SDC1      | 2p24.1       | -0.06491 | 0.205574 | 0.313917567 |
| WFDC11    | 20q13.12     | -0.06489 | 0.205743 | 0.314152339 |
| COTL1     | 16q24.1      | 0.064883 | 0.205764 | 0.314155452 |
| LOC145845 | 15q14        | 0.064879 | 0.20579  | 0.314155452 |
| PRTFDC1   | 10p12.1      | -0.06488 | 0.205792 | 0.314155452 |
| MS4A6A    | 11q12.2      | 0.064863 | 0.205903 | 0.314299542 |
| PRSS3     | 9p13.3       | 0.064852 | 0.205978 | 0.314390709 |
| HMGB3P1   | 20q11.22     | -0.06484 | 0.206072 | 0.314510294 |
| CAV2      | 7q31.2       | -0.06484 | 0.206096 | 0.314522417 |
| SZRD1     | 1p36.13      | 0.064826 | 0.206162 | 0.314571311 |
| THPO      | 3q27.1       | -0.06483 | 0.206168 | 0.314571311 |
| DEFB136   | 8p23.1       | 0.064824 | 0.206175 | 0.314571311 |
| ST7-OT4   | 7q31.2       | -0.06481 | 0.20627  | 0.314677073 |
| GPR139    | 16p12.3      | 0.06481  | 0.206276 | 0.314677073 |
| DRAM2     | 1p13.3       | 0.064791 | 0.206407 | 0.314853205 |
| KCNK13    | 14q32.11     | 0.064788 | 0.20643  | 0.314864762 |
| RNF17     | 13q12.12     | 0.064776 | 0.20651  | 0.314958741 |
| ASPRV1    | 2p13.3       | 0.064774 | 0.206523 | 0.314958741 |
| SLC25A39  | 17q21.31     | -0.06476 | 0.206643 | 0.315116893 |
| DCP2      | 5q22.2       | 0.064737 | 0.206786 | 0.315312008 |
| OLFM3     | 1p21.1       | 0.064724 | 0.206877 | 0.315404727 |
| POLR3D    | 8p21.3       | 0.064724 | 0.206879 | 0.315404727 |
| RIPOR2    | 6p22.3       | 0.064719 | 0.206915 | 0.315436094 |
| HCK       | 20q11.21     | 0.064678 | 0.207204 | 0.315853002 |
| LAMB2     | 3p21.31      | -0.06466 | 0.207353 | 0.316055348 |
| RABGAP1   | 9q33.2-q33.3 | -0.06464 | 0.20745  | 0.316179191 |
| PTGR2     | 14q24.3      | -0.06464 | 0.207491 | 0.316217534 |
| DUS2      | 16q22.1      | 0.064617 | 0.20763  | 0.316406158 |
| HIRIP3    | 16p11.2      | 0.064592 | 0.207808 | 0.316652693 |
| GLI2      | 2q14.2       | -0.06458 | 0.207867 | 0.316704431 |
| PHACTR1   | 6p24.1       | -0.06458 | 0.207881 | 0.316704431 |
| MRPL42    | 12q22        | 0.064578 | 0.207903 | 0.316704431 |
| GNRHR     | 4q13.2       | -0.06458 | 0.207905 | 0.316704431 |
| ZDHHC12   | 9q34.11      | 0.064552 | 0.20809  | 0.316962654 |
| NOP2      | 12p13.31     | -0.06454 | 0.208157 | 0.317040413 |
| PCNX2     | 1q42.2       | -0.06454 | 0.208183 | 0.317055663 |
| EVI2A     | 17q11.2      | 0.064525 | 0.208277 | 0.317156608 |
| FAM186B   | 12q13.12     | -0.06452 | 0.208281 | 0.317156608 |
| LAT2      | 7q11.23      | -0.06451 | 0.20841  | 0.317328399 |
| GSK3B     | 3q13.33      | -0.0645  | 0.208442 | 0.317352924 |
| RPL13AP17 | 7q21.11      | 0.064493 | 0.208504 | 0.317406614 |
| ELOF1     | 19p13.2      | -0.06449 | 0.208509 | 0.317406614 |
| DEK       | 6p22.3       | 0.064485 | 0.208566 | 0.317469542 |
| PAX8      | 2q14.1       | -0.06448 | 0.208582 | 0.317469542 |
| FMO3      | 1q24.3       | -0.06447 | 0.208681 | 0.317596085 |
| SSTR2     | 17q25.1      | -0.06445 | 0.208832 | 0.317802205 |
| ZP1       | 11q12.2      | -0.0644  | 0.209151 | 0.318264106 |
| CFHR5     | 1q31.3       | -0.0644  | 0.20919  | 0.318298575 |
| KLRD1     | 12p13.2      | 0.064387 | 0.20926  | 0.318381329 |



|           |               |          |          |             |
|-----------|---------------|----------|----------|-------------|
| SH3YL1    | 2p25.3        | -0.06435 | 0.20953  | 0.318767876 |
| SNAR-1    | 3q28          | -0.06435 | 0.209553 | 0.318779129 |
| ATXN3     | 14q32.12      | 0.064343 | 0.20957  | 0.318779865 |
| C10ORF90  | 10q26.2       | -0.06434 | 0.209594 | 0.318792481 |
| LHFPL3    | 7q22.2-q22.3  | 0.064329 | 0.209668 | 0.318880402 |
| ZNF605    | 12q24.33      | -0.06432 | 0.209764 | 0.319002384 |
| C3AR1     | 12p13.31      | 0.064298 | 0.209891 | 0.319166647 |
| SDF2L1    | 22q11.21      | 0.064294 | 0.209917 | 0.319166647 |
| TCF15     | 20p13         | -0.06429 | 0.20992  | 0.319166647 |
| PRKACB    | 1p31.1        | 0.064284 | 0.209987 | 0.319244954 |
| MDF1      | 6p21.1        | -0.06428 | 0.210029 | 0.319283517 |
| CHRNA9    | 4p14          | 0.064273 | 0.210065 | 0.319315183 |
| ITPRIPL2  | 16p12.3       | 0.06426  | 0.21016  | 0.319435099 |
| RRAS      | 19q13.33      | -0.06426 | 0.210186 | 0.319440127 |
| SLC39A11  | 17q24.3-q25.1 | -0.06425 | 0.210195 | 0.319440127 |
| NUP62     | 19q13.33      | 0.064249 | 0.210238 | 0.319481032 |
| GC        | 4q13.3        | 0.064244 | 0.210272 | 0.319508594 |
| PCDH12    | 5q31.3        | -0.06421 | 0.210486 | 0.319787059 |
| POM121L9P | 22q11.23      | -0.06421 | 0.210507 | 0.319787059 |
| ANP32A    | 15q23         | -0.06421 | 0.210517 | 0.319787059 |
| NFASC     | 1q32.1        | -0.06421 | 0.210535 | 0.319787059 |
| ALDH1A1   | 9q21.13       | 0.064207 | 0.210535 | 0.319787059 |
| SETDB1    | 1q21.3        | -0.06416 | 0.210879 | 0.320284556 |
| AIFM1     | Xq26.1        | -0.06413 | 0.211112 | 0.320614635 |
| PRAMEF2   | 1p36.21       | -0.06412 | 0.211133 | 0.320621724 |
| OR5AN1    | 11q12.1       | 0.06412  | 0.211158 | 0.320635487 |
| SCUBE2    | 11p15.4       | -0.06409 | 0.211369 | 0.320931286 |
| ENSA      | 1q21.3        | 0.064082 | 0.211424 | 0.320990974 |
| ANP32C    | 4q32.3        | -0.06408 | 0.211474 | 0.321028669 |
| KLC4      | 6p21.1        | -0.06407 | 0.211481 | 0.321028669 |
| TRIM5     | 11p15.4       | 0.064059 | 0.211592 | 0.321172416 |
| SPRY4     | 5q31.3        | 0.064006 | 0.21197  | 0.321716094 |
| FAM41AY1  | Yq11.222      | 0.064003 | 0.211994 | 0.321716094 |
| PPP1R12C  | 19q13.42      | -0.064   | 0.211998 | 0.321716094 |
| TTY6B     | Yq11.223      | -0.064   | 0.212022 | 0.321727471 |
| CRAMP1    | 16p13.3       | -0.06399 | 0.212049 | 0.32174448  |
| MFSD8     | 4q28.2        | -0.06399 | 0.212084 | 0.32177387  |
| UFC1      | 1q23.3        | -0.06397 | 0.212246 | 0.321995003 |
| MYCL      | 1p34.2        | -0.06396 | 0.212268 | 0.322003355 |
| SSH2      | 17q11.2       | 0.063927 | 0.212535 | 0.322384866 |
| RAD52     | 12p13.33      | -0.06392 | 0.212566 | 0.322406131 |
| ANGPTL6   | 19p13.2       | 0.063914 | 0.212629 | 0.322477885 |
| CYP4F11   | 19p13.12      | 0.063901 | 0.212723 | 0.32259572  |
| SPN       | 16p11.2       | 0.063865 | 0.212979 | 0.322945452 |
| PLK4      | 4q28.1        | 0.063864 | 0.212986 | 0.322945452 |
| OR10J3    | 1q23.2        | 0.06386  | 0.213016 | 0.322966722 |
| YPEL3     | 16p11.2       | -0.06385 | 0.213112 | 0.323088732 |
| C14ORF39  | 14q23.1       | -0.06383 | 0.213226 | 0.323232012 |
| KCNJ14    | 19q13.33      | -0.06383 | 0.213239 | 0.323232012 |
| TFDP1     | 13q34         | -0.0638  | 0.21344  | 0.323506767 |
| SKIV2L    | 6p21.33       | -0.0638  | 0.213453 | 0.323506767 |
| ELMOD2    | 4q31.1        | 0.06379  | 0.213518 | 0.323580824 |
| WBP11     | 12p12.3       | -0.06376 | 0.213701 | 0.323826222 |
| SPATA22   | 17p13.2       | 0.063763 | 0.213712 | 0.323826222 |
| PCNA      | 20p12.3       | -0.06376 | 0.213745 | 0.323852357 |
| OR5B12    | 11q12.1       | 0.063739 | 0.213887 | 0.324041734 |
| CALR3     | 19p13.11      | -0.06374 | 0.213905 | 0.324045253 |
| KIAA0754  | 1p34.3        | -0.06373 | 0.213956 | 0.324098194 |

|          |                 |          |          |             |
|----------|-----------------|----------|----------|-------------|
| PRKCZ    | 1p36.33         | -0.06372 | 0.214031 | 0.324186429 |
| EYS      | 6q12            | 0.063706 | 0.214123 | 0.324301626 |
| GHR      | 5p13.1-p12      | -0.0637  | 0.214201 | 0.324385417 |
| MRPS22   | 3q23            | -0.06369 | 0.214211 | 0.324385417 |
| FAM66A   | 8p23.1          | 0.063684 | 0.214285 | 0.324462768 |
| GSX1     | 13q12.2         | -0.06368 | 0.214294 | 0.324462768 |
| TMEM184B | 22q13.1         | 0.063643 | 0.214577 | 0.324866684 |
| DPH3     | 3p25.1          | -0.06364 | 0.214611 | 0.32487638  |
| EMP1     | 12p13.1         | 0.063638 | 0.214616 | 0.32487638  |
| NDUFA8   | 9q33.2          | -0.06363 | 0.214697 | 0.324974157 |
| TPP1     | 11p15.4         | 0.063613 | 0.214793 | 0.325095486 |
| NCR3LG1  | 11p15.1         | 0.063604 | 0.214859 | 0.325169767 |
| XAGE5    | Xp11.22         | -0.0636  | 0.214893 | 0.325197067 |
| CIART    | 1q21.2          | -0.06359 | 0.214963 | 0.325260784 |
| PDCD1    | 2q37.3          | 0.063589 | 0.214967 | 0.325260784 |
| SIGLEC9  | 19q13.41        | 0.063526 | 0.215427 | 0.32593111  |
| CPTP     | 1p36.33         | 0.063522 | 0.21545  | 0.325941925 |
| CYCSP52  | 1q23.1          | 0.063513 | 0.215519 | 0.326012921 |
| ZHX2     | 8q24.13         | 0.063511 | 0.21553  | 0.326012921 |
| TRAF2    | 9q34.3          | -0.0635  | 0.215623 | 0.326129778 |
| CECR7    | 22q11.1         | -0.06349 | 0.215719 | 0.326243255 |
| TMEM147  | 19q13.12        | -0.06348 | 0.215731 | 0.326243255 |
| TAS1R2   | 1p36.13         | 0.063468 | 0.215847 | 0.326393701 |
| PRINS    | 10p12.1         | -0.06346 | 0.215914 | 0.326470729 |
| SFN      | 1p36.11         | 0.063453 | 0.215954 | 0.32650568  |
| CASP8    | 2q33.1          | -0.06345 | 0.215969 | 0.32650568  |
| OR2K2    | 9q31.3          | -0.06345 | 0.215987 | 0.326507931 |
| HSPA2    | 14q23.3         | 0.063442 | 0.216034 | 0.326554291 |
| ADM2     | 22q13.33        | -0.06343 | 0.216144 | 0.326696091 |
| EMILIN3  | 20q12           | -0.0634  | 0.216347 | 0.326977114 |
| ATRN     | 20p13           | -0.0634  | 0.216366 | 0.326982096 |
| CFAP161  | 15q25.1         | 0.063368 | 0.216571 | 0.327266184 |
| PRKY     | Yp11.2          | 0.06335  | 0.216704 | 0.327443382 |
| UBXN7    | 3q29            | -0.06334 | 0.216793 | 0.327553284 |
| TTC3     | 21q22.13        | 0.063282 | 0.217194 | 0.328134373 |
| GGTA1P   | 9q33.2          | 0.063268 | 0.217295 | 0.328261185 |
| SMCO2    | 12p11.23        | 0.063266 | 0.217316 | 0.32826817  |
| GID4     | 17p11.2 17p11.2 | 0.063237 | 0.21752  | 0.328530413 |
| FTH1P3   | 2p23.3          | -0.06324 | 0.217522 | 0.328530413 |
| TINCR    | 19p13.3         | 0.063223 | 0.217626 | 0.328662704 |
| ERBB4    | 2q34            | -0.06322 | 0.217642 | 0.328662704 |
| EZH1     | 17q21.2         | -0.06322 | 0.217679 | 0.328687273 |
| STX10    | 19p13.13        | 0.063214 | 0.217692 | 0.328687273 |
| FAM83H   | 8q24.3          | -0.06321 | 0.217715 | 0.328698049 |
| VPS4A    | 16q22.1         | -0.06321 | 0.217753 | 0.328711226 |
| UCN      | 2p23.3          | -0.06321 | 0.217757 | 0.328711226 |
|          | 10-Mar 17q23.2  | 0.063196 | 0.217824 | 0.328787433 |
| ENC1     | 5q13.3          | 0.063178 | 0.217952 | 0.328956928 |
| DHX58    | 17q21.2         | 0.063176 | 0.217971 | 0.328960596 |
| ST7      | 7q31.2          | -0.06316 | 0.218102 | 0.329129223 |
| G2E3     | 14q12           | 0.063156 | 0.218116 | 0.329129223 |
| PEG10    | 7q21.3          | -0.06309 | 0.218588 | 0.329816576 |
| NSUN2    | 5p15.31         | 0.063075 | 0.218709 | 0.329974725 |
| CORO1C   | 12q24.11        | -0.06307 | 0.218753 | 0.330016411 |
| TPM1     | 15q22.2         | 0.063062 | 0.2188   | 0.330062855 |
| MMAB     | 12q24.11        | -0.06305 | 0.218855 | 0.330121188 |
| EDC4     | 16q22.1         | -0.06305 | 0.218873 | 0.330122473 |
| BMP1     | 8p21.3          | -0.06303 | 0.21907  | 0.330394825 |

|              |               |          |          |             |
|--------------|---------------|----------|----------|-------------|
| ZBTB17       | 1p36.13       | -0.06302 | 0.219101 | 0.330399733 |
| ANP32AP1     | 15q14         | -0.06302 | 0.219106 | 0.330399733 |
| ADAMTS17     | 15q26.3       | 0.063005 | 0.21922  | 0.330546158 |
| HHLA3        | 1p31.1        | 0.063    | 0.219254 | 0.330553485 |
| RBM7         | 11q23.2       | 0.063    | 0.219258 | 0.330553485 |
| MEFV         | 16p13.3       | 0.062983 | 0.219378 | 0.330709712 |
| NEK2         | 1q32.3        | 0.062977 | 0.219427 | 0.330735799 |
| ZNF430       | 19p12         | -0.06298 | 0.219428 | 0.330735799 |
| SCARNA14     | 15q22.31      | -0.06295 | 0.219612 | 0.33098839  |
| PSD4         | 2q14.1        | 0.062949 | 0.219633 | 0.330995456 |
| UBE2O        | 17q25.1       | -0.06293 | 0.219806 | 0.331219508 |
| UBL7         | 15q24.1       | -0.06292 | 0.219815 | 0.331219508 |
| ARRDC3       | 5q14.3        | 0.062912 | 0.219902 | 0.331325614 |
| IFIT1        | 10q23.31      | -0.0629  | 0.219983 | 0.331413421 |
| C1QTNF8      | 16p13.3       | 0.062899 | 0.219994 | 0.331413421 |
| INHA         | 2q35          | -0.06288 | 0.220125 | 0.331587204 |
| RIF1         | 2q23.3        | -0.06287 | 0.220214 | 0.331695403 |
| ASNA1        | 19p13.13      | 0.062835 | 0.22047  | 0.332030765 |
| TAF7L        | Xq22.1        | -0.06283 | 0.220484 | 0.332030765 |
| IQSEC1       | 3p25.2-p25.1  | -0.06283 | 0.220486 | 0.332030765 |
| ZNF227       | 19q13.31      | -0.06281 | 0.220624 | 0.3322134   |
| OXR1         | 8q23.1        | -0.06281 | 0.220688 | 0.332285052 |
| TBPL2        | 14q22.3       | 0.062791 | 0.220795 | 0.332404133 |
| GRIK4        | 11q23.3       | -0.06279 | 0.220801 | 0.332404133 |
| POM121L10P   | 22q11.23      | -0.06276 | 0.220998 | 0.332651917 |
| HMCES        | 3q21.3        | -0.06276 | 0.220998 | 0.332651917 |
| OR9A4        | 7q34          | -0.06276 | 0.221049 | 0.332692725 |
| RRP36        | 6p21.1        | -0.06275 | 0.221059 | 0.332692725 |
| CD163        | 12p13.31      | 0.062747 | 0.221114 | 0.332751336 |
| TIGAR        | 12p13.32      | -0.06272 | 0.221332 | 0.33305373  |
| SYMPK        | 19q13.32      | -0.06271 | 0.221373 | 0.333071713 |
| MT1DP        | 16q13         | 0.062711 | 0.22138  | 0.333071713 |
| LOC154449    | 6q27          | 0.062709 | 0.221394 | 0.333071713 |
| TYRO3        | 15q15.1       | -0.06269 | 0.221567 | 0.333307496 |
| RAD51        | 15q15.1       | 0.062681 | 0.221607 | 0.333320768 |
| BEAN1        | 16q21         | -0.06268 | 0.221609 | 0.333320768 |
| C8B          | 1p32.2        | 0.062673 | 0.221662 | 0.333375717 |
| RXFP2        | 13q13.1       | -0.06265 | 0.221804 | 0.333560258 |
| ZNF766       | 19q13.41      | -0.06265 | 0.221818 | 0.333560258 |
| AZGP1        | 7q22.1        | -0.06264 | 0.221877 | 0.333623746 |
| ITGA10       | 1q21.1        | -0.06264 | 0.221917 | 0.333658524 |
| SLC22A10     | 11q12.3       | 0.062634 | 0.221953 | 0.333681491 |
| FKBP6        | 7q11.23       | -0.06263 | 0.221966 | 0.333681491 |
| MRC1         | 10p12.33      | 0.062612 | 0.222116 | 0.33388256  |
| RSAD2        | 2p25.2        | 0.062598 | 0.22222  | 0.334013133 |
| TCF21        | 6q23.2        | -0.06258 | 0.222371 | 0.334215603 |
| TMEM104      | 17q25.1       | -0.06257 | 0.222416 | 0.334257603 |
| SLC7A5P2     | 16p12.2       | -0.06256 | 0.222488 | 0.334341222 |
| RASGEF1A     | 10q11.21      | 0.062555 | 0.222532 | 0.334382312 |
| LOC100130987 | 11q13.2       | 0.062537 | 0.22267  | 0.334564507 |
| TBL1X        | Xp22.31-p22.2 | 0.062534 | 0.222693 | 0.334574243 |
| GPHA2        | 11q13.1       | -0.06253 | 0.222715 | 0.334582102 |
| NCF2         | 1q25.3        | 0.062522 | 0.222781 | 0.334655901 |
| UCN2         | 3p21.31       | -0.06252 | 0.222803 | 0.334664216 |
| BPIFB6       | 20q11.21      | 0.062487 | 0.223041 | 0.334995836 |
| CHPF         | 2q35          | -0.06248 | 0.223097 | 0.33505547  |
| OSGIN1       | 16q23.3       | 0.062475 | 0.223131 | 0.335080734 |
| ANXA8L1      | 10q11.22      | -0.06247 | 0.22317  | 0.33511406  |

|            |          |          |          |             |
|------------|----------|----------|----------|-------------|
| SNORA2C    | 12q13.11 | -0.06247 | 0.223188 | 0.335116462 |
| SREK1IP1   | 5q12.3   | 0.062453 | 0.223295 | 0.335252537 |
| ZSCAN1     | 19q13.43 | -0.06243 | 0.223431 | 0.335386728 |
| PABPN1     | 14q11.2  | -0.06243 | 0.223433 | 0.335386728 |
| TMED9      | 5q35.3   | 0.062433 | 0.223438 | 0.335386728 |
| SLC35G5    | 8p23.1   | 0.062431 | 0.223452 | 0.335386728 |
| CSGALNACT2 | 10q11.21 | -0.06243 | 0.22349  | 0.335419734 |
| GRIN2A     | 16p13.2  | -0.06242 | 0.223536 | 0.335463098 |
| LRRC75A    | 17p11.2  | 0.062418 | 0.223553 | 0.335463098 |
| ISG15      | 1p36.33  | -0.06241 | 0.22361  | 0.335524401 |
| OR6C70     | 12q13.2  | -0.0624  | 0.223664 | 0.335579525 |
| TBC1D22B   | 6p21.2   | 0.062399 | 0.22369  | 0.335594192 |
| RAB1A      | 2p14     | 0.062391 | 0.223754 | 0.335665116 |
| OPTC       | 1q32.1   | -0.06239 | 0.223774 | 0.33566527  |
| PLCB2      | 15q15.1  | 0.062386 | 0.223788 | 0.33566527  |
| AFF3       | 2q11.2   | 0.062371 | 0.223898 | 0.33580583  |
| DLK1       | 14q32.2  | -0.06235 | 0.224021 | 0.335963695 |
| NLRP10     | 11p15.4  | -0.06232 | 0.224286 | 0.336336267 |
| GADD45G    | 9q22.2   | 0.062309 | 0.22436  | 0.336401311 |
| GJB4       | 1p34.3   | 0.062306 | 0.224389 | 0.336401311 |
| HERC2P4    | 16p11.2  | -0.06231 | 0.224392 | 0.336401311 |
| EMC9       | 14q12    | 0.062304 | 0.224402 | 0.336401311 |
| ASB16      | 17q21.31 | -0.0623  | 0.224413 | 0.336401311 |
| DNHD1      | 11p15.4  | -0.0623  | 0.224442 | 0.336419423 |
| AIDA       | 1q41     | 0.062294 | 0.224477 | 0.336447156 |
| ANKEF1     | 20p12.2  | -0.06228 | 0.224545 | 0.336522962 |
| EOGT       | 3p14.1   | -0.06228 | 0.22458  | 0.336550739 |
| PNLIPRP3   | 10q25.3  | 0.062277 | 0.224599 | 0.336554704 |
| PEBP1      | 12q24.23 | -0.06227 | 0.224689 | 0.336663964 |
| SIVA1      | 14q32.33 | -0.06226 | 0.224729 | 0.336698929 |
| QPCTL      | 19q13.32 | -0.06226 | 0.224752 | 0.336707428 |
| PALLD      | 4q32.3   | 0.062252 | 0.224787 | 0.336735177 |
| GPR22      | 7q22.3   | -0.06224 | 0.224849 | 0.336802008 |
| LINC00304  | 16q24.3  | 0.062225 | 0.224992 | 0.336991312 |
| ACTR6      | 12q23.1  | 0.062183 | 0.225302 | 0.337430094 |
| PHIP       | 6q14.1   | -0.06217 | 0.225364 | 0.337498841 |
| AHNAK2     | 14q32.33 | -0.06217 | 0.225413 | 0.337545904 |
| CARD17     | 11q22.3  | 0.062139 | 0.225634 | 0.33785259  |
| DCTD       | 4q35.1   | -0.06213 | 0.22568  | 0.337895626 |
| WDR78      | 1p31.3   | 0.062116 | 0.225802 | 0.338053685 |
| SNORA66    | 1p22.1   | -0.0621  | 0.225935 | 0.33822668  |
| PLGLA      | 2q12.2   | 0.062073 | 0.226125 | 0.338486149 |
| SORCS2     | 4p16.1   | -0.06207 | 0.226143 | 0.338487097 |
| FOXF1      | 16q24.1  | -0.06204 | 0.226401 | 0.338848266 |
| TRH        | 3q22.1   | -0.06203 | 0.226444 | 0.33888814  |
| OCRL       | Xq26.1   | -0.06202 | 0.226532 | 0.338993365 |
| ZNF683     | 1p36.11  | 0.062013 | 0.226577 | 0.339019157 |
| SH3BGR     | 21q22.2  | -0.06201 | 0.226599 | 0.339019157 |
| DSG4       | 18q12.1  | 0.06201  | 0.2266   | 0.339019157 |
| SNORA70    | Xq28     | 0.061984 | 0.226794 | 0.339263679 |
| M1AP       | 2p13.1   | 0.061984 | 0.226797 | 0.339263679 |
| TP53TG5    | 20q13.12 | -0.06198 | 0.226826 | 0.339281105 |
| NACA4P     | 8q22.3   | -0.06198 | 0.226858 | 0.339304378 |
| ZNF600     | 19q13.41 | -0.06197 | 0.226881 | 0.339312893 |
| HNRNPA3    | 2q31.2   | -0.06196 | 0.226942 | 0.33937945  |
| TMEM105    | 17q25.3  | -0.06195 | 0.227073 | 0.339550034 |
| IRF2BP1    | 19q13.32 | -0.06194 | 0.227107 | 0.339575487 |
| ALG1L2     | 3q22.1   | 0.061939 | 0.227131 | 0.339585645 |

|           |               |          |          |             |
|-----------|---------------|----------|----------|-------------|
| PRLHR     | 10q26.11      | -0.06194 | 0.227154 | 0.339594286 |
| TRPS1     | 8q23.3        | -0.06193 | 0.227181 | 0.339609441 |
| NEK5      | 13q14.3       | -0.06192 | 0.227304 | 0.339768525 |
| C17ORF102 | 17q12         | -0.06191 | 0.227362 | 0.339830148 |
| GOLGA2P7  | 15q25.2       | -0.06191 | 0.227382 | 0.339834727 |
| OR2L8     | 1q44          | -0.0619  | 0.227459 | 0.339924425 |
| ADRA2B    | 2q11.2        | 0.061873 | 0.227628 | 0.340126618 |
| RBFOX2    | 22q12.3       | -0.06187 | 0.227629 | 0.340126618 |
| SUN1      | 7p22.3        | -0.06187 | 0.227658 | 0.340144833 |
| CLEC3B    | 3p21.31       | -0.06186 | 0.227701 | 0.340169156 |
| CALHM6    | 6q22.1        | 0.061862 | 0.227708 | 0.340169156 |
| HEPN1     | 11q24.2       | -0.06186 | 0.227732 | 0.340179141 |
| C4ORF47   | 4q35.1        | -0.06185 | 0.227778 | 0.340222379 |
| FABP5P3   | 7q36.1        | -0.06184 | 0.227863 | 0.340309854 |
| ZBTB47    | 3p22.1        | -0.06184 | 0.22787  | 0.340309854 |
| VAMP7     | Xq28 and Yq12 | -0.06182 | 0.228008 | 0.340490399 |
| PPDPFL    | 8q11.21       | -0.06182 | 0.228026 | 0.340492017 |
| MECR      | 1p35.3        | -0.06181 | 0.228068 | 0.340529242 |
| BUB1B     | 15q15.1       | 0.061799 | 0.228183 | 0.340675959 |
| FKBPL     | 6p21.32       | -0.0618  | 0.228203 | 0.340679649 |
| HNRNPUL2  | 11q12.3       | -0.06179 | 0.228256 | 0.340734244 |
| LILRB2    | 19q13.42      | 0.061779 | 0.228339 | 0.340832483 |
| CCL27     | 9p13.3        | -0.06177 | 0.228429 | 0.340930966 |
| UFD1      | 22q11.21      | -0.06176 | 0.228451 | 0.340930966 |
| SLC4A8    | 12q13.13      | -0.06176 | 0.228477 | 0.340930966 |
| ISX       | 22q12.3       | -0.06176 | 0.228487 | 0.340930966 |
| LURAP1L   | 9p23          | -0.06176 | 0.22849  | 0.340930966 |
| FLT1      | 13q12.3       | -0.06174 | 0.228598 | 0.341065616 |
| SPHK2     | 19q13.33      | -0.06174 | 0.228666 | 0.341142079 |
| PHF2      | 9q22.31       | -0.06172 | 0.228765 | 0.341264648 |
| LCN10     | 9q34.3        | -0.06172 | 0.228783 | 0.341265539 |
| CHI3L1    | 1q32.1        | -0.06171 | 0.228895 | 0.341407929 |
| CLIP1     | 12q24.31      | 0.061699 | 0.228942 | 0.341452884 |
| FBXO15    | 18q22.3       | 0.061691 | 0.229    | 0.341463342 |
| PCDHGA6   | 5q31.3        | -0.06169 | 0.229002 | 0.341463342 |
| PRPSAP2   | 17p11.2       | 0.061687 | 0.229034 | 0.341463342 |
| NLRP6     | 11p15.5       | -0.06169 | 0.229034 | 0.341463342 |
| HIST1H2AK | 6p22.1        | -0.06169 | 0.229035 | 0.341463342 |
| RPSAP58   | 19p12         | -0.06168 | 0.22906  | 0.341475086 |
| CDHR3     | 7q22.3        | -0.06166 | 0.229235 | 0.341711823 |
| WSCD1     | 17p13.2       | 0.061648 | 0.229328 | 0.341824797 |
| PATJ      | 1p31.3        | 0.061643 | 0.229367 | 0.341857642 |
| PHOX2A    | 11q13.4       | -0.06164 | 0.229417 | 0.341906812 |
| SCTR      | 2q14.2        | 0.061613 | 0.229589 | 0.342136692 |
| SPAM1     | 7q31.32       | 0.061578 | 0.22986  | 0.342515028 |
| OLIG1     | 21q22.11      | -0.06157 | 0.22991  | 0.342563683 |
| CRH       | 8q13.1        | -0.06156 | 0.229987 | 0.34263705  |
| LEP       | 7q32.1        | -0.06156 | 0.229993 | 0.34263705  |
| ZNF44     | 19p13.2       | -0.06155 | 0.230044 | 0.342688061 |
| PTENP1    | 9p13.3        | 0.061549 | 0.230079 | 0.342713653 |
| DESI1     | 22q13.2       | -0.06153 | 0.230204 | 0.342875492 |
| SCN2A     | 2q24.3        | -0.06153 | 0.230224 | 0.342878784 |
| NROB1     | Xp21.2        | -0.06152 | 0.230308 | 0.342974198 |
| USB1      | 16q21         | -0.06152 | 0.230322 | 0.342974198 |
| DPEP3     | 16q22.1       | 0.061509 | 0.230384 | 0.343041082 |
| SMARCD1   | 4q22.3        | -0.0615  | 0.230453 | 0.343117903 |
| MTMR6     | 13q12.13      | -0.06149 | 0.230546 | 0.343231158 |
| TSPYL6    | 2p16.2        | 0.061484 | 0.230567 | 0.343237216 |

|            |          |          |          |             |
|------------|----------|----------|----------|-------------|
| TMEM52B    | 12p13.2  | -0.06148 | 0.230591 | 0.343247403 |
| ZNF37BP    | 10q11.21 | 0.061461 | 0.230744 | 0.343449259 |
| XCR1       | 3p21.31  | 0.061452 | 0.230813 | 0.343510548 |
| SCGB1B2P   | 19q13.11 | -0.06145 | 0.230819 | 0.343510548 |
| ZNF763     | 19p13.2  | -0.06143 | 0.230968 | 0.34370643  |
| IFI35      | 17q21.31 | 0.061426 | 0.231011 | 0.34374425  |
| B3GALNT1   | 3q26.1   | -0.06142 | 0.231058 | 0.343789383 |
| CDC26      | 9q32     | -0.06139 | 0.231258 | 0.344061244 |
| DRAM1      | 12q23.2  | 0.061368 | 0.231452 | 0.344323487 |
| DEFA1B     | 8p23.1   | 0.061356 | 0.231548 | 0.344440987 |
| MINPP1     | 10q23.2  | -0.06135 | 0.23158  | 0.344462646 |
| CCDC172    | 10q25.3  | 0.061341 | 0.231659 | 0.344555553 |
| CCNQP1     | 1q32.1   | -0.06132 | 0.231786 | 0.344718954 |
| GPR182     | 12q13.3  | -0.06131 | 0.231861 | 0.344805017 |
| SLC35A2    | Xp11.23  | -0.06131 | 0.231903 | 0.344841176 |
| GORASP1    | 3p22.2   | 0.061306 | 0.231929 | 0.344854644 |
| RAB2B      | 14q11.2  | -0.06129 | 0.232054 | 0.345014656 |
| OSBPL11    | 3q21.2   | 0.061283 | 0.232098 | 0.34505089  |
| BAHD1      | 15q15.1  | 0.061281 | 0.232117 | 0.34505089  |
| RD3        | 1q32.3   | 0.061279 | 0.23213  | 0.34505089  |
| HEATR4     | 14q24.3  | -0.06126 | 0.232282 | 0.345250387 |
| SLITRK4    | Xq27.3   | -0.06125 | 0.232385 | 0.345377972 |
| GIGYF2     | 2q37.1   | -0.06123 | 0.232498 | 0.345520738 |
| TBX15      | 1p12     | -0.06123 | 0.232521 | 0.345529328 |
| LLCFC1     | 7q34     | 0.061208 | 0.232673 | 0.345729671 |
| FMNL1      | 17q21.31 | 0.061185 | 0.232847 | 0.345962328 |
| AKAP10     | 17p11.2  | 0.06118  | 0.232885 | 0.345992943 |
| IP6K1      | 3p21.31  | -0.06117 | 0.232984 | 0.346114116 |
| NEK7       | 1q31.3   | 0.061162 | 0.23303  | 0.346156978 |
| SOX1       | 13q34    | -0.06115 | 0.233099 | 0.346234076 |
| SLC48A1    | 12q13.11 | 0.061146 | 0.233147 | 0.346279435 |
| PEX7       | 6q23.3   | -0.06114 | 0.233165 | 0.346280687 |
| MEF2B      | 19p13.11 | -0.06112 | 0.233378 | 0.346570917 |
| LRRC37A16P | 17q24.2  | 0.06111  | 0.233426 | 0.346597874 |
| COL23A1    | 5q35.3   | 0.061109 | 0.23343  | 0.346597874 |
| HIST1H1B   | 6p22.1   | -0.0611  | 0.233482 | 0.346649212 |
| ARIH1      | 15q24.1  | -0.06109 | 0.233586 | 0.346755105 |
| SLC25A47   | 14q32.2  | -0.06109 | 0.233588 | 0.346755105 |
| FAM238C    | 10p12.1  | 0.061085 | 0.233616 | 0.346770361 |
| CT45A6     | Xq26.3   | -0.06108 | 0.233639 | 0.346774474 |
| INTS10     | 8p21.3   | 0.06108  | 0.233653 | 0.346774474 |
| OR2T34     | 1q44     | 0.061074 | 0.2337   | 0.34681876  |
| C5AR1      | 19q13.32 | 0.061065 | 0.233769 | 0.346894609 |
| SCN1B      | 19q13.11 | -0.06105 | 0.233851 | 0.346991451 |
| PCNAP1     | 4q23     | 0.061008 | 0.234206 | 0.347491694 |
| LIPG       | 18q21.1  | 0.061001 | 0.234265 | 0.34755313  |
| KIR3DX1    | 19q13.42 | 0.060991 | 0.234341 | 0.347640844 |
| ACOX1      | 17q25.1  | -0.06098 | 0.234448 | 0.347774061 |
| CAPN7      | 3p25.1   | -0.06094 | 0.234766 | 0.348203046 |
| SHCBP1L    | 1q25.3   | -0.06093 | 0.234772 | 0.348203046 |
| OR6B3      | 2q37.3   | -0.06089 | 0.235084 | 0.348639883 |
| LRRC18     | 10q11.23 | 0.060892 | 0.235102 | 0.348639999 |
| FSD2       | 15q25.2  | 0.060868 | 0.235282 | 0.348881557 |
| NLRP5      | 19q13.43 | -0.06087 | 0.235304 | 0.34888802  |
| P2RX1      | 17p13.2  | 0.060858 | 0.23536  | 0.348945172 |
| OR10A2     | 11p15.4  | -0.06085 | 0.235427 | 0.349018755 |
| ZNF543     | 19q13.43 | 0.060846 | 0.235458 | 0.349038674 |
| MTRF1L     | 6q25.2   | -0.06082 | 0.235654 | 0.349303265 |

|            |          |          |          |             |
|------------|----------|----------|----------|-------------|
| COL4A4     | 2q36.3   | 0.060796 | 0.235841 | 0.349555671 |
| SNORA71D   | 20q11.23 | -0.06079 | 0.23587  | 0.349571979 |
| STRADA     | 17q23.3  | -0.06079 | 0.235921 | 0.349622166 |
| ARHGEF18   | 19p13.2  | 0.060781 | 0.235956 | 0.349648026 |
| GPR62      | 3p21.2   | -0.06078 | 0.235996 | 0.349672653 |
| MACROD2    | 20p12.1  | -0.06077 | 0.236008 | 0.349672653 |
| PCYT2      | 17q25.3  | 0.060768 | 0.236056 | 0.349718226 |
| EPB41      | 1p35.3   | 0.060759 | 0.236127 | 0.349798297 |
| SNORA27    | 13q12.2  | -0.06075 | 0.236224 | 0.349915765 |
| DDX4       | 5q11.2   | -0.06074 | 0.236287 | 0.349983498 |
| HIST2H2BE  | 1q21.2   | -0.06073 | 0.236339 | 0.350033644 |
| CLVS2      | 6q22.31  | -0.06072 | 0.236413 | 0.350118026 |
| WIPI1      | 17q24.2  | 0.060681 | 0.236732 | 0.350563869 |
| GRM2       | 3p21.2   | -0.06068 | 0.236755 | 0.350572862 |
| NIPSNAP1   | 22q12.2  | -0.06067 | 0.236815 | 0.350635406 |
| OR1E1      | 17p13.3  | 0.060659 | 0.236902 | 0.3507341   |
| FAM234A    | 16p13.3  | -0.06066 | 0.236917 | 0.3507341   |
| DDHD1      | 14q22.1  | -0.06065 | 0.236995 | 0.350824145 |
| PDGFA      | 7p22.3   | -0.06064 | 0.237045 | 0.350872309 |
| ENO1       | 1p36.23  | 0.060634 | 0.237092 | 0.350892038 |
| ITGAM      | 16p11.2  | 0.060634 | 0.237093 | 0.350892038 |
| OR4C45     | 11p11.12 | 0.060628 | 0.237135 | 0.350928037 |
| GBP7       | 1p22.2   | 0.060583 | 0.237489 | 0.351411913 |
| RAB36      | 22q11.23 | -0.06058 | 0.237497 | 0.351411913 |
| KCTD15     | 19q13.11 | 0.060577 | 0.237536 | 0.351442787 |
| SH3GL2     | 9p22.2   | -0.06056 | 0.23765  | 0.351586305 |
| FAM90A1    | 12p13.31 | -0.06054 | 0.237811 | 0.351767951 |
| SLC1A6     | 19p13.12 | -0.06054 | 0.237831 | 0.351767951 |
| PTPRJ      | 11p11.2  | 0.060538 | 0.237835 | 0.351767951 |
| MTNR1B     | 11q14.3  | 0.060537 | 0.237843 | 0.351767951 |
| ACSL4      | Xq23     | -0.06051 | 0.238036 | 0.352026183 |
| TENM4      | 11q14.1  | -0.06049 | 0.238211 | 0.352259984 |
| CLEC9A     | 12p13.2  | 0.060486 | 0.238239 | 0.352274435 |
| NLRP8      | 19q13.43 | -0.06047 | 0.238396 | 0.352481676 |
| LBP        | 20q11.23 | -0.06046 | 0.23845  | 0.352535192 |
| CDK9       | 9q34.11  | 0.060448 | 0.238538 | 0.352638661 |
| OCIAD2     | 4p11     | 0.060444 | 0.238565 | 0.352652255 |
| GABARAPL1  | 12p13.2  | -0.06044 | 0.238635 | 0.352730245 |
| LINC00696  | 3p21.2   | 0.06043  | 0.23868  | 0.352770842 |
| RFX2       | 19p13.3  | 0.060385 | 0.239029 | 0.3532605   |
| ZNF300     | 5q33.1   | -0.06038 | 0.239079 | 0.353308776 |
| LY75       | 2q24.2   | -0.06036 | 0.239209 | 0.353473693 |
| PRLH       | 2q37.3   | 0.060348 | 0.239319 | 0.353610279 |
| UCK2       | 1q24.1   | -0.06034 | 0.239366 | 0.353654708 |
| ERN1       | 17q23.3  | 0.060331 | 0.239449 | 0.353740197 |
| TMCC2      | 1q32.1   | -0.06033 | 0.23946  | 0.353740197 |
| UNC5B      | 10q22.1  | 0.060325 | 0.239492 | 0.353761252 |
| NOP14      | 4p16.3   | 0.060323 | 0.239509 | 0.353761252 |
| HLA-DQA2   | 6p21.32  | 0.060308 | 0.239628 | 0.353888751 |
| LOC286359  | 9q22.33  | -0.06031 | 0.239631 | 0.353888751 |
| PRAMEF20   | 1p36.21  | -0.0603  | 0.239697 | 0.353949688 |
| LRTOMT     | 11q13.4  | 0.060298 | 0.239707 | 0.353949688 |
| HP1BP3     | 1p36.12  | 0.060292 | 0.239754 | 0.353993129 |
| RNU6ATAC   | 9q34.2   | -0.06029 | 0.239775 | 0.353997552 |
| SLC25A51P1 | 6q12     | 0.060285 | 0.239804 | 0.354014691 |
| CLEC4G     | 19p13.2  | 0.06028  | 0.23985  | 0.354056087 |
| MAVS       | 20p13    | -0.06028 | 0.239882 | 0.35406493  |
| KIAA1328   | 18q12.2  | 0.060274 | 0.239894 | 0.35406493  |

|           |                       |          |          |             |
|-----------|-----------------------|----------|----------|-------------|
| CEP126    | 11q22.1               | 0.060272 | 0.239909 | 0.35406493  |
| SAMHD1    | 20q11.23              | 0.060257 | 0.240029 | 0.354215101 |
| CDH11     | 16q21                 | -0.06025 | 0.240108 | 0.354305708 |
| HUS1B     | 6p25.3                | -0.06023 | 0.240223 | 0.354450183 |
| MMP26     | 11p15.4               | 0.060229 | 0.240248 | 0.354460406 |
| CD300C    | 17q25.1               | 0.060223 | 0.240294 | 0.354501797 |
| ZNF346    | 5q35.2                | -0.06021 | 0.240391 | 0.354618572 |
| BTG3      | 21q21.1               | 0.06019  | 0.240547 | 0.354806095 |
| MYSM1     | 1p32.1                | 0.06019  | 0.240553 | 0.354806095 |
| DDX3X     | Xp11.4                | 0.060187 | 0.240576 | 0.354813557 |
| DOC2A     | 16p11.2               | -0.06017 | 0.240674 | 0.35493156  |
| KRTAP26-1 | 21q22.11              | 0.060164 | 0.240755 | 0.355025265 |
| KCNJ12    | 17p11.2               | -0.06015 | 0.240826 | 0.355104296 |
| ZNF469    | 16q24.2               | -0.06013 | 0.240991 | 0.355320689 |
| ZFP90     | 16q22.1               | 0.060125 | 0.241063 | 0.355401509 |
| ZNF317    | 19p13.2               | -0.06012 | 0.241136 | 0.35548234  |
| MSL2      | 3q22.3                | -0.06011 | 0.241186 | 0.355530828 |
| ASIP      | 20q11.22              | -0.0601  | 0.241267 | 0.35562376  |
| SEMA3D    | 7q21.11               | -0.06008 | 0.241404 | 0.355798561 |
| SNORA1    | 11q21                 | 0.060072 | 0.241475 | 0.355877825 |
| CASP9     | 1p36.21               | 0.060058 | 0.241582 | 0.355987907 |
| ANKRD26P3 | 13q12.11              | 0.060058 | 0.241585 | 0.355987907 |
| COX6B1    | 19q13.12              | -0.06003 | 0.241776 | 0.356242777 |
| MOS       | 8q12.1                | -0.06003 | 0.241834 | 0.356301988 |
| CFAP157   | 9q34.11               | 0.06002  | 0.241881 | 0.35633556  |
| GCM2      | 6p24.2                | -0.06002 | 0.241893 | 0.35633556  |
| GTF2IP1   | 7q11.23               | -0.06001 | 0.241928 | 0.356362213 |
| SBF1P1    | 8q12.1                | -0.06001 | 0.241977 | 0.356407477 |
| CSN3      | 4q13.3                | 0.060001 | 0.242032 | 0.35646179  |
| MRPL39    | 21q21.3               | 0.059993 | 0.242094 | 0.356527835 |
| SFPQ      | 1p34.3                | -0.05998 | 0.242201 | 0.356658679 |
| BANP      | 16q24.2               | -0.05997 | 0.242277 | 0.356744289 |
| LINC00114 | 21q22.2               | 0.059962 | 0.242339 | 0.356809614 |
| CDH13     | 16q23.3               | -0.05995 | 0.242445 | 0.356939118 |
| SNAI3-AS1 | 16q24.2               | -0.05994 | 0.242483 | 0.35695649  |
| CARD10    | 22q13.1               | 0.059943 | 0.242492 | 0.35695649  |
| YARS2     | 12p11.21              | -0.05992 | 0.242648 | 0.357159791 |
| SEPTIN14  | 7p11.2                | -0.05991 | 0.242756 | 0.357291436 |
| UROD      | 1p34.1                | 0.059905 | 0.242791 | 0.357316934 |
| PSMA3     | 14q23.1               | -0.0599  | 0.242809 | 0.357318135 |
| VPS41     | 7p14.1                | -0.05987 | 0.24303  | 0.357616457 |
| DIXDC1    | 11q23.1               | -0.05987 | 0.243055 | 0.357627644 |
| CST7      | 20p11.21              | -0.05985 | 0.243232 | 0.357861124 |
| SNORD15B  | 11q13.4               | -0.05981 | 0.243536 | 0.358282667 |
| PLEKHF2   | 8q22.1                | -0.05979 | 0.243706 | 0.358506077 |
| SUFU      | 10q24.32              | 0.059769 | 0.243864 | 0.358712435 |
| GART      | 21q22.11              | -0.05975 | 0.243973 | 0.35884627  |
| FKBP9P1   | 7p11.2                | -0.05975 | 0.244006 | 0.358867477 |
| GNG5      | 1p22.3                | 0.059741 | 0.244081 | 0.358932546 |
| SNX31     | 8q22.3                | -0.05974 | 0.244086 | 0.358932546 |
| HAUS3     | 4p16.3                | -0.05974 | 0.24413  | 0.358947311 |
| ZNF584    | 19q13.43              | 0.059735 | 0.244131 | 0.358947311 |
| PCSK9     | 1p32.3                | 0.059717 | 0.244275 | 0.359131276 |
| C9ORF131  | 9p13.3                | -0.05971 | 0.244362 | 0.359226307 |
| P3H3      | 12p13.31              | -0.0597  | 0.244375 | 0.359226307 |
|           | 5-Mar 10q23.32-q23.33 | 0.059702 | 0.244394 | 0.359227491 |
| OR11G2    | 14q11.2               | -0.0597  | 0.244413 | 0.359229406 |
| ITSN2     | 2p23.3                | 0.059693 | 0.24446  | 0.359272441 |



|             |               |          |          |             |
|-------------|---------------|----------|----------|-------------|
| FCER1A      | 1q23.2        | 0.059662 | 0.244707 | 0.359608058 |
| FAM169B     | 15q26.3       | 0.059658 | 0.244741 | 0.359632013 |
| NUP205      | 7q33          | -0.05965 | 0.24483  | 0.359737048 |
| ATAD3B      | 1p36.33       | -0.05964 | 0.244922 | 0.359846031 |
| NRG1        | 8p12          | 0.059629 | 0.24497  | 0.359889937 |
| MS4A10      | 11q12.2       | 0.059607 | 0.245144 | 0.360104483 |
| PRB1        | 12p13.2       | 0.059606 | 0.245152 | 0.360104483 |
| CYLC2       | 9q31.1        | -0.05959 | 0.245304 | 0.360301248 |
| RBM24       | 6p22.3        | 0.059579 | 0.245363 | 0.360360975 |
| PIPSL       | 10q23.33      | -0.05955 | 0.245585 | 0.360661011 |
| CCDC185     | 1q41          | 0.059549 | 0.245607 | 0.360666847 |
| MAPRE3      | 2p23.3        | -0.05952 | 0.245818 | 0.360949668 |
| ATL1        | 14q22.1       | -0.05952 | 0.245843 | 0.360960887 |
| SLC26A3     | 7q22.3-q31.1  | 0.059477 | 0.246175 | 0.361421832 |
| BST1        | 4p15.32       | -0.05944 | 0.246476 | 0.36183684  |
| ABCF3       | 3q27.1        | -0.05942 | 0.246606 | 0.361968823 |
| PRR29       | 17q23.3       | -0.05942 | 0.24661  | 0.361968823 |
| C22ORF15    | 22q11.23      | 0.059421 | 0.24662  | 0.361968823 |
| CHST2       | 3q24          | 0.059409 | 0.246721 | 0.36209063  |
| TMEM242     | 6q25.3        | -0.0594  | 0.246805 | 0.362186268 |
| SLC7A3      | Xq13.1        | 0.059394 | 0.246836 | 0.362206131 |
| GPR137      | 11q13.1       | 0.059372 | 0.247017 | 0.362445444 |
| ZKSCAN3     | 6p22.1        | 0.059363 | 0.247086 | 0.362519649 |
| SFMBT2      | 10p14         | 0.059342 | 0.247254 | 0.362740014 |
| SIGLECL1    | 19q13.41      | 0.059338 | 0.247286 | 0.362760455 |
| DDO         | 6q21          | -0.05932 | 0.247402 | 0.362903628 |
| SCRT1       | 8q24.3        | -0.05931 | 0.24749  | 0.363001727 |
| CHMP4A      | 14q12         | -0.05931 | 0.247505 | 0.363001727 |
| ARHGAP29    | 1p22.1        | 0.059291 | 0.24766  | 0.36320209  |
| TERF2       | 16q22.1       | -0.05928 | 0.247762 | 0.363324313 |
| ARHGAP24    | 4q21.23-q21.3 | 0.059267 | 0.247854 | 0.363433908 |
| MAP11       | 7q22.1        | 0.059241 | 0.248059 | 0.363683558 |
| NCKAP1      | 2q32.1        | -0.05924 | 0.248061 | 0.363683558 |
| GGTLC2      | 22q11.22      | -0.05921 | 0.248275 | 0.363970016 |
| PELI1       | 2p14          | 0.059212 | 0.248295 | 0.36397368  |
| TBX3        | 12q24.21      | 0.059197 | 0.248411 | 0.364116268 |
| ZNRF2       | 7p14.3        | -0.05919 | 0.24843  | 0.364117407 |
| SGSM2       | 17p13.3       | 0.05918  | 0.24855  | 0.364256113 |
| TMEM178A    | 2p22.1        | -0.05918 | 0.248561 | 0.364256113 |
| GGA2        | 16p12.2       | -0.05917 | 0.248595 | 0.364279993 |
| RPS15       | 19p13.3       | -0.05916 | 0.248721 | 0.364437814 |
| TUSC1       | 9p21.2        | 0.059134 | 0.248919 | 0.364690362 |
| NUP210      | 3p25.1        | -0.05913 | 0.24893  | 0.364690362 |
| FAM181A-AS1 | 14q32.12      | -0.05913 | 0.248969 | 0.364721159 |
| XKR6        | 8p23.1        | -0.05912 | 0.249012 | 0.364757124 |
| SNRPD1      | 18q11.2       | 0.059077 | 0.24937  | 0.365255386 |
| HIST1H2BM   | 6p22.1        | 0.059073 | 0.249407 | 0.365282912 |
| ZNF234      | 19q13.31      | -0.05906 | 0.249484 | 0.365369023 |
| RAB1B       | 11q13.2       | 0.059032 | 0.249733 | 0.365680214 |
| LRP8        | 1p32.3        | -0.05903 | 0.249733 | 0.365680214 |
| CYP2A13     | 19q13.2       | -0.05902 | 0.249826 | 0.365789327 |
| SH2D2A      | 1q23.1        | -0.05901 | 0.249917 | 0.36589527  |
| PRSS38      | 1q42.13       | -0.05897 | 0.250239 | 0.366340301 |
| AKIRIN1     | 1p34.3        | 0.05893  | 0.250554 | 0.366774938 |
| ADCYAP1R1   | 7p14.3        | -0.05893 | 0.250587 | 0.366796599 |
| CFLAR       | 2q33.1        | -0.0589  | 0.250811 | 0.367084167 |
| GOLGA6D     | 15q24.2       | -0.0589  | 0.25082  | 0.367084167 |
| CSNK1G2     | 19p13.3       | -0.05889 | 0.25091  | 0.367166856 |

|            |                 |          |          |             |
|------------|-----------------|----------|----------|-------------|
| SLC5A4     | 22q12.3         | -0.05889 | 0.250914 | 0.367166856 |
| DBP        | 19q13.33        | 0.05888  | 0.250962 | 0.367201292 |
| EIF3K      | 19q13.2         | 0.058876 | 0.250991 | 0.367201292 |
| SYT6       | 1p13.2          | -0.05887 | 0.251001 | 0.367201292 |
| RANGAP1    | 22q13.2         | -0.05887 | 0.25101  | 0.367201292 |
| PIP5KL1    | 9q34.11         | -0.05886 | 0.25112  | 0.367334546 |
| ZNF578     | 19q13.41        | -0.05885 | 0.251182 | 0.367399092 |
| TJP1       | 15q13.1         | 0.058844 | 0.25125  | 0.367471338 |
| GBP1       | 1p22.2          | 0.058835 | 0.251321 | 0.367548674 |
| CADPS      | 3p14.2          | 0.058829 | 0.251366 | 0.3675879   |
| CNTN5      | 11q22.1         | -0.05881 | 0.251497 | 0.367751647 |
| BPESC1     | 3q23            | 0.058808 | 0.251541 | 0.367789053 |
| CLC        | 19q13.2         | -0.0588  | 0.251588 | 0.36780179  |
| HHAT       | 1q32.2          | 0.058801 | 0.251594 | 0.36780179  |
| SAMD15     | 14q24.3         | -0.0588  | 0.251605 | 0.36780179  |
| ZNF384     | 12p13.31        | -0.05879 | 0.251672 | 0.367874154 |
| OR2Z1      | 19p13.2         | -0.05877 | 0.251846 | 0.368073421 |
| RBMY3AP    | Yp11.2          | 0.05877  | 0.251846 | 0.368073421 |
| CHST7      | Xp11.3          | -0.05876 | 0.251954 | 0.36820552  |
| TNFAIP8L1  | 19p13.3         | 0.058741 | 0.25208  | 0.368361809 |
| RESF1      | 12p11.21        | 0.058735 | 0.252132 | 0.368395614 |
| HMGCLL1    | 6p12.1          | 0.058734 | 0.25214  | 0.368395614 |
| POLR2B     | 4q12            | 0.058716 | 0.252283 | 0.36857889  |
| ARSH       | Xp22.33         | 0.058714 | 0.252303 | 0.368580276 |
| KLHL1      | 13q21.33        | 0.058708 | 0.25235  | 0.36862289  |
| ZNF551     | 19q13.43        | -0.05871 | 0.252369 | 0.368622943 |
| MED23      | 6q23.2          | 0.058701 | 0.252404 | 0.368646962 |
| ARHGAP22   | 10q11.22-q11.23 | 0.058685 | 0.252531 | 0.368763101 |
| TET3       | 2p13.1          | -0.05868 | 0.252536 | 0.368763101 |
| GUCA1C     | 3q13.13         | -0.05868 | 0.252538 | 0.368763101 |
| SLC15A3    | 11q12.2         | 0.058672 | 0.252637 | 0.368880525 |
| CLTA       | 9p13.3          | -0.05866 | 0.252731 | 0.368991132 |
| EP400P1    | 12q24.33        | -0.05866 | 0.252752 | 0.368994791 |
| FAM74A1    | 9p12            | -0.05865 | 0.252812 | 0.369055593 |
| NKAIN3-IT1 | 8q12.3          | -0.05865 | 0.252853 | 0.369088622 |
| B9D1       | 17p11.2         | 0.058642 | 0.25288  | 0.369100004 |
| TRIP4      | 15q22.31        | 0.058636 | 0.252934 | 0.369121184 |
| STYX       | 14q22.1         | 0.058634 | 0.252949 | 0.369121184 |
| QDPR       | 4p15.32         | -0.05863 | 0.252949 | 0.369121184 |
| MAGEC3     | Xq27.2          | -0.05862 | 0.253032 | 0.369204926 |
| RILPL2     | 12q24.31        | 0.058622 | 0.253044 | 0.369204926 |
| GPKOW      | Xp11.23         | -0.05862 | 0.253072 | 0.369212076 |
| FAM182B    | 20p11.1         | -0.05862 | 0.253086 | 0.369212076 |
| CCN4       | 8q24.22         | -0.05861 | 0.253107 | 0.369215933 |
| MGC16275   | 17q25.1         | -0.0586  | 0.253246 | 0.369392788 |
| AADA4L4    | 1p36.21         | 0.058591 | 0.253299 | 0.369442964 |
| RNF24      | 20p13           | -0.05859 | 0.253334 | 0.369464986 |
| CGAS       | 6q13            | 0.058584 | 0.253351 | 0.369464986 |
| SCGB2B2    | 19q13.11        | 0.058574 | 0.253438 | 0.369529673 |
| PAN2       | 12q13.3         | -0.05857 | 0.253438 | 0.369529673 |
| VHLL       | 1q22            | -0.05857 | 0.253451 | 0.369529673 |
| SRRM4      | 12q24.23        | -0.05857 | 0.253493 | 0.369564852 |
| TSHZ3      | 19q12           | -0.05856 | 0.253571 | 0.369651541 |
| OR5AK2     | 11q12.1         | -0.05852 | 0.253896 | 0.37009727  |
| ATOX8      | 2p11.2          | -0.0585  | 0.25407  | 0.370324465 |
| FOXH1      | 8q24.3          | -0.05848 | 0.254166 | 0.370437865 |
| SPO11      | 20q13.31        | -0.05846 | 0.254341 | 0.370665887 |
| CMTM2      | 16q21           | 0.058457 | 0.254385 | 0.370683711 |

|            |               |          |          |             |
|------------|---------------|----------|----------|-------------|
| FLYWCH1    | 16p13.3       | -0.05846 | 0.25439  | 0.370683711 |
| C9ORF106   | 9q34.11       | -0.05845 | 0.254417 | 0.370695175 |
| RPS2P32    | 7p15.3        | -0.05843 | 0.254644 | 0.370999239 |
| KCNJ6      | 21q22.13      | 0.058421 | 0.25468  | 0.37102514  |
| HERC4      | 10q21.3       | 0.05841  | 0.254767 | 0.371124911 |
| ZNF735     | 7q11.21       | -0.05838 | 0.254981 | 0.371408796 |
| LINC01341  | 1q44          | -0.05838 | 0.255044 | 0.37145917  |
| LINGO1     | 15q24.3       | 0.058375 | 0.255052 | 0.37145917  |
| OTOAP1     | 16p12.2       | -0.05837 | 0.255109 | 0.3715142   |
| ZBTB32     | 19q13.12      | 0.058346 | 0.255291 | 0.371752891 |
| EHD2       | 19q13.33      | -0.05834 | 0.255345 | 0.371803911 |
| MATK       | 19p13.3       | 0.058333 | 0.255392 | 0.371845944 |
| LCN8       | 9q34.3        | 0.058314 | 0.255554 | 0.372015296 |
| ERICH3     | 1p31.1        | 0.058312 | 0.255569 | 0.372015296 |
| ADAM23     | 2q33.3        | -0.05831 | 0.255615 | 0.372015296 |
| LINC00606  | 3p25.3        | -0.05831 | 0.25562  | 0.372015296 |
| PPBPP1     | 4q13.3        | -0.05831 | 0.25562  | 0.372015296 |
| DEFB123    | 20q11.21      | -0.05831 | 0.25562  | 0.372015296 |
| TIMD4      | 5q33.3        | 0.058292 | 0.255731 | 0.372130216 |
| SSTR4      | 20p11.21      | -0.05829 | 0.255736 | 0.372130216 |
| RANBP17    | 5q35.1        | 0.058284 | 0.255795 | 0.372188536 |
| CAPN6      | Xq23          | -0.05828 | 0.25586  | 0.372256125 |
| CREB3      | 9p13.3        | 0.05827  | 0.255907 | 0.372298251 |
| NUP155     | 5p13.2        | -0.05824 | 0.256133 | 0.372598912 |
| GIMAP8     | 7q36.1        | 0.058237 | 0.256177 | 0.372635873 |
| DCTN2      | 12q13.3       | 0.058225 | 0.256275 | 0.372752239 |
| FAM27E5    | 17p11.2       | -0.05822 | 0.256298 | 0.372757898 |
| KIF15      | 3p21.31       | -0.05821 | 0.256379 | 0.372849236 |
| DPEP2      | 16q22.1       | 0.05821  | 0.256402 | 0.372855466 |
| CHD9       | 16q12.2       | 0.058202 | 0.256466 | 0.372920624 |
| PSORS1C2   | 6p21.33       | 0.058198 | 0.256501 | 0.372944376 |
| ADGRE1     | 19p13.3-p13.2 | 0.058186 | 0.256599 | 0.373036692 |
| OGFOD2     | 12q24.31      | -0.05819 | 0.256601 | 0.373036692 |
| LCE1F      | 1q21.3        | -0.05817 | 0.256721 | 0.373155345 |
| TAS2R31    | 12p13.2       | -0.05817 | 0.256735 | 0.373155345 |
| MRPL52     | 14q11.2       | -0.05817 | 0.256739 | 0.373155345 |
| TTY15      | Yq11.221      | -0.05816 | 0.256788 | 0.373200374 |
| LINC00597  | 15q24.3       | 0.058154 | 0.256858 | 0.373274177 |
| SLC35F2    | 11q22.3       | -0.05815 | 0.256892 | 0.37329709  |
| PYGL       | 14q22.1       | 0.058117 | 0.257162 | 0.373662324 |
| HELQ       | 4q21.23       | 0.058107 | 0.257242 | 0.373750649 |
| ATG101     | 12q13.13      | -0.0581  | 0.257335 | 0.373859513 |
| GRIN3B     | 19p13.3       | -0.05808 | 0.257427 | 0.373959234 |
| BCAT1      | 12p12.1       | -0.05808 | 0.257441 | 0.373959234 |
| ASF1B      | 19p13.12      | 0.05808  | 0.257466 | 0.373968038 |
| FBXW8      | 12q24.22      | 0.05807  | 0.257553 | 0.37406667  |
| ARPC1B     | 7q22.1        | -0.05806 | 0.257662 | 0.374198689 |
| CPSF4L     | 17q25.1       | -0.05805 | 0.257684 | 0.374203419 |
| ZNRF1      | 16q23.1       | 0.058049 | 0.25772  | 0.374229139 |
| GABRG1     | 4p12          | -0.05803 | 0.257852 | 0.374367431 |
| PRKN       | 6q26          | -0.05803 | 0.257853 | 0.374367431 |
| FUT9       | 6q16.1        | -0.05802 | 0.257924 | 0.374443762 |
| GALNT15    | 3p25.1        | -0.05802 | 0.257986 | 0.374505714 |
| PRKAG1     | 12q13.12      | -0.05799 | 0.258234 | 0.37483827  |
| C2CD4D-AS1 | 1q21.3        | 0.057981 | 0.258282 | 0.374882116 |
| ZNF761     | 19q13.42      | -0.05797 | 0.258393 | 0.375015245 |
| VPS13B     | 8q22.2        | -0.05796 | 0.258489 | 0.37512689  |
| ST8SIA4    | 5q21.1        | 0.057944 | 0.258587 | 0.375242374 |

|              |               |          |          |             |
|--------------|---------------|----------|----------|-------------|
| PCGF6        | 10q24.33      | -0.05792 | 0.258813 | 0.375543171 |
| CHKB         | 22q13.33      | -0.0579  | 0.258925 | 0.375671442 |
| ERGIC2       | 12p11.22      | -0.0579  | 0.258939 | 0.375671442 |
| KRT24        | 17q21.2       | 0.057896 | 0.258978 | 0.375701254 |
| CEP295       | 11q21         | -0.05788 | 0.259088 | 0.375833198 |
| OR6K6        | 1q23.1        | -0.05784 | 0.259434 | 0.376280093 |
| OR10Z1       | 1q23.1        | 0.057841 | 0.259434 | 0.376280093 |
| LOC646214    | 15q11.2       | -0.05782 | 0.259601 | 0.376495797 |
| CD70         | 19p13.3       | -0.05782 | 0.259631 | 0.376512342 |
| TMEM184C     | 4q31.23       | 0.057801 | 0.259763 | 0.3766758   |
| AGAP2-AS1    | 12q14.1       | 0.057779 | 0.259948 | 0.376889373 |
| LOC283922    | 16q23.1       | -0.05778 | 0.259948 | 0.376889373 |
| SHISAL1      | 22q13.31      | -0.05775 | 0.260175 | 0.377190904 |
| TRPC4        | 13q13.3       | -0.05775 | 0.260207 | 0.377211367 |
| PCDHA7       | 5q31.3        | -0.05774 | 0.260234 | 0.377221955 |
| CACNA1H      | 16p13.3       | -0.05773 | 0.260357 | 0.3773735   |
| DHH          | 12q13.12      | -0.05772 | 0.260417 | 0.377433748 |
| TPI1P3       | 6q22.1        | 0.057704 | 0.260565 | 0.377619857 |
| LOC100192426 | 18p11.23      | 0.05767  | 0.260844 | 0.377996892 |
| NKX2-8       | 14q13.3       | 0.057665 | 0.260891 | 0.378038203 |
| ACACB        | 12q24.11      | -0.05766 | 0.260934 | 0.378073467 |
| FBXO7        | 22q12.3       | -0.05766 | 0.26097  | 0.378097789 |
| PCDH18       | 4q28.3        | -0.05764 | 0.261056 | 0.378167107 |
| KNSTRN       | 15q15.1       | -0.05764 | 0.261056 | 0.378167107 |
| CCNE2        | 8q22.1        | 0.05762  | 0.261264 | 0.37844214  |
| MRGPRX2      | 11p15.1       | -0.0576  | 0.261425 | 0.378647524 |
| ADGRL2       | 1p31.1        | -0.05758 | 0.261589 | 0.378852599 |
| LRRC37A6P    | 10p12.1       | 0.057579 | 0.261604 | 0.378852599 |
| CACNB4       | 2q23.3        | -0.05758 | 0.261626 | 0.378856247 |
| ZNF705A      | 12p13.31      | -0.05757 | 0.261664 | 0.378881153 |
| ASB12        | Xq11.2        | 0.057569 | 0.261681 | 0.378881153 |
| OR1E2        | 17p13.2       | 0.057556 | 0.261795 | 0.37901923  |
| EMC1         | 1p36.13       | 0.05755  | 0.261839 | 0.379055874 |
| RXFP1        | 4q32.1        | -0.05752 | 0.262081 | 0.379378148 |
| PROK1        | 1p13.3        | -0.05752 | 0.262102 | 0.379380572 |
| TMOD4        | 1q21.3        | -0.0575  | 0.262299 | 0.379617269 |
| OR8S1        | 12q13.11      | -0.05749 | 0.262303 | 0.379617269 |
| TEC          | 4p12-p11      | 0.057466 | 0.262537 | 0.379928652 |
| ZFP42        | 4q35.2        | -0.05746 | 0.262623 | 0.380024913 |
| TMEM241      | 18q11.2       | -0.05745 | 0.262643 | 0.380026646 |
| ARHGAP20     | 11q22.3-q23.1 | 0.05745  | 0.262674 | 0.38004436  |
| SAP130       | 2q14.3        | -0.05741 | 0.263007 | 0.380498044 |
| PSMC1        | 14q32.11      | -0.0574  | 0.26306  | 0.380548375 |
| IST1         | 16q22.2       | -0.0574  | 0.263091 | 0.380564986 |
| OR1S1        | 11q12.1       | -0.05738 | 0.263286 | 0.380803182 |
| TPTEP1       | 22q11.1       | -0.05738 | 0.263294 | 0.380803182 |
| OR5AR1       | 11q12.1       | -0.05737 | 0.263333 | 0.380818249 |
| FAM83F       | 22q13.1       | 0.05737  | 0.263342 | 0.380818249 |
| PIAS4        | 19p13.3       | 0.057366 | 0.263371 | 0.380832272 |
| NDUFV1       | 11q13.2       | 0.057353 | 0.26348  | 0.380963084 |
| CENPS        | 1p36.22       | 0.057349 | 0.263518 | 0.380990087 |
| PLCD4        | 2q35          | -0.05735 | 0.263545 | 0.380997376 |
| LAMTOR2      | 1q22          | -0.05734 | 0.263561 | 0.380997376 |
| PROP1        | 5q35.3        | 0.05732  | 0.263754 | 0.381248597 |
| EXOC5        | 14q22.3       | 0.057316 | 0.263791 | 0.381274665 |
| SPDL1        | 5q35.1        | 0.057304 | 0.263887 | 0.381386045 |
| NGLY1        | 3p24.2        | 0.057279 | 0.264097 | 0.381638853 |
| ZNF200       | 16p13.3       | -0.05728 | 0.2641   | 0.381638853 |

|          |          |          |          |             |
|----------|----------|----------|----------|-------------|
| TRPC6    | 11q22.1  | -0.05726 | 0.26423  | 0.38179841  |
| PRND     | 20p13    | -0.05724 | 0.26442  | 0.382006883 |
| HTR2C    | Xq23     | -0.05724 | 0.264431 | 0.382006883 |
| ARV1     | 1q42.2   | 0.057239 | 0.264431 | 0.382006883 |
| HSPBP1   | 19q13.42 | 0.057234 | 0.264474 | 0.382041722 |
| FAM201A  | 9p13.1   | -0.05723 | 0.264514 | 0.382071364 |
| BRD8     | 5q31.2   | 0.057214 | 0.26464  | 0.382225821 |
| EPO      | 7q22.1   | -0.05719 | 0.26482  | 0.38245792  |
| OAT      | 10q26.13 | -0.05719 | 0.264878 | 0.382500535 |
| SLC15A4  | 12q24.33 | -0.05718 | 0.264888 | 0.382500535 |
| TSIX     | Xq13.2   | -0.05718 | 0.264906 | 0.382500535 |
| MGC2889  | 3q29     | 0.057169 | 0.265021 | 0.382638401 |
| NPR1     | 1q21.3   | -0.05716 | 0.265067 | 0.382676913 |
| OR4F6    | 15q26.3  | -0.05716 | 0.265133 | 0.382744435 |
| SERPINE2 | 2q36.1   | -0.05713 | 0.265321 | 0.382988747 |
| TTL10    | 1p36.33  | -0.05712 | 0.265417 | 0.383081551 |
| FGG      | 4q32.1   | -0.05712 | 0.265424 | 0.383081551 |
| PRR23C   | 3q23     | -0.05711 | 0.265473 | 0.383124878 |
| TMEM245  | 9q31.3   | -0.05707 | 0.265825 | 0.383605051 |
| GRHPR    | 9p13.2   | 0.057063 | 0.265906 | 0.3836947   |
| ZBTB40   | 1p36.12  | -0.05706 | 0.265931 | 0.383703548 |
| MED12L   | 3q25.1   | -0.05706 | 0.265962 | 0.383720768 |
| PLEKHG4B | 5p15.33  | -0.05705 | 0.266021 | 0.383777298 |
| CORO1A   | 16p11.2  | 0.057044 | 0.266067 | 0.383816125 |
| RNF115   | 1q21.1   | -0.05704 | 0.266092 | 0.383824977 |
| IL11     | 19q13.42 | -0.05704 | 0.266112 | 0.383826009 |
| IGF1     | 12q23.2  | -0.05704 | 0.266141 | 0.38384004  |
| BRD4     | 19p13.12 | -0.05703 | 0.266204 | 0.383903681 |
| PLRG1    | 4q31.3   | -0.05702 | 0.26626  | 0.383956861 |
| LRRCC1   | 8q21.2   | -0.05702 | 0.266309 | 0.383999615 |
| PRG2     | 11q12.1  | 0.057004 | 0.266402 | 0.384096597 |
| FREM1    | 9p22.3   | -0.057   | 0.266423 | 0.384096597 |
| GOLPH3   | 5p13.3   | 0.057    | 0.266434 | 0.384096597 |
| DNASE2   | 19p13.13 | -0.057   | 0.266465 | 0.384113281 |
| ESPL1    | 12q13.13 | 0.056993 | 0.266492 | 0.384124751 |
| PRPSAP1  | 17q25.1  | 0.056982 | 0.266591 | 0.384240543 |
| CYP2U1   | 4q25     | 0.056976 | 0.26664  | 0.384283315 |
| MCM9     | 6q22.31  | -0.05697 | 0.266673 | 0.384302613 |
| GAGE13   | Xp11.23  | 0.056964 | 0.266739 | 0.38437067  |
| SPATA20  | 17q21.33 | -0.05694 | 0.266941 | 0.384633441 |
| RPAP1    | 15q15.1  | -0.05693 | 0.267019 | 0.384717996 |
| FOXD2    | 1p33     | -0.05692 | 0.267098 | 0.384805173 |
| CHST1    | 11p11.2  | -0.05692 | 0.26712  | 0.384805671 |
| NAPEPLD  | 7q22.1   | 0.056916 | 0.267144 | 0.384805671 |
| SPATA41  | 15q26.3  | 0.056914 | 0.267156 | 0.384805671 |
| COL6A3   | 2q37.3   | -0.05691 | 0.267209 | 0.384853698 |
| ZSWIM7   | 17p12    | 0.056899 | 0.267285 | 0.384935668 |
| DLGAP3   | 1p34.3   | -0.05687 | 0.267521 | 0.385247329 |
| SCARNA15 | 15q25.2  | -0.05686 | 0.267655 | 0.385413096 |
| SLAMF9   | 1q23.2   | -0.05685 | 0.267696 | 0.385444437 |
| SYVN1    | 11q13.1  | -0.05684 | 0.267787 | 0.385548439 |
| C19ORF54 | 19q13.2  | 0.056823 | 0.267924 | 0.385716753 |
| FOXE1    | 9q22.33  | -0.05682 | 0.26795  | 0.385727681 |
| SLC10A6  | 4q21.3   | 0.056813 | 0.268011 | 0.38577079  |
| WDR38    | 9q33.3   | -0.05681 | 0.268019 | 0.38577079  |
| RNASE12  | 14q11.2  | 0.056799 | 0.268127 | 0.385883999 |
| ZNF37A   | 10p11.1  | 0.056798 | 0.268136 | 0.385883999 |
| BRS3     | Xq26.3   | 0.056778 | 0.268307 | 0.38610185  |

|                        |                     |          |          |             |
|------------------------|---------------------|----------|----------|-------------|
| ATP6V1G1               | 9q32                | -0.05674 | 0.268587 | 0.386477264 |
| SCNN1B                 | 16p12.2             | -0.05673 | 0.268748 | 0.386681726 |
| CCDC163                | 1p34.1              | 0.056718 | 0.268816 | 0.38675149  |
| CROT                   | 7q21.12             | 0.056711 | 0.268873 | 0.386804954 |
| AK2                    | 1p35.1              | 0.056672 | 0.269206 | 0.387256549 |
| OPN5                   | 6p12.3              | -0.05667 | 0.269233 | 0.387267223 |
| PPBPP2                 | 4q13.3              | -0.05664 | 0.269456 | 0.387560904 |
| ABCA2                  | 9q34.3              | 0.056628 | 0.269574 | 0.387702627 |
| DACT1                  | 14q23.1             | -0.05662 | 0.269645 | 0.387777068 |
| ZNF320                 | 19q13.41            | 0.056614 | 0.269691 | 0.387814794 |
| GNB4                   | 3q26.33             | -0.05661 | 0.269714 | 0.387821047 |
| CSTF2                  | Xq22.1              | -0.05657 | 0.270036 | 0.388246302 |
| SNHG28                 | 1q23.2              | 0.05657  | 0.270065 | 0.388246302 |
| APOF                   | 12q13.3             | 0.05657  | 0.270068 | 0.388246302 |
| PTPRVP                 | 1q32.1              | 0.056557 | 0.270179 | 0.388378045 |
| NEGR1                  | 1p31.1              | -0.05654 | 0.270341 | 0.388581925 |
| PDE3B                  | 11p15.2             | -0.05653 | 0.270394 | 0.388630195 |
| AHSG                   | 3q27.3              | 0.056521 | 0.270478 | 0.388723321 |
| NLRP7                  | 19q13.42            | 0.056513 | 0.270547 | 0.388755012 |
| SYN2                   | 3p25.2              | -0.05651 | 0.270548 | 0.388755012 |
| SUDS3                  | 12q24.23            | 0.056512 | 0.270558 | 0.388755012 |
| KRBA2                  | 17p13.1             | 0.056481 | 0.270825 | 0.389110712 |
| VPS36                  | 13q14.3             | -0.05647 | 0.270918 | 0.389216844 |
| SNCG                   | 10q23.2             | -0.05646 | 0.270993 | 0.389271408 |
| FBXL3                  | 13q22.3             | -0.05646 | 0.270995 | 0.389271408 |
| HS3ST6                 | 16p13.3             | 0.056457 | 0.271028 | 0.389290924 |
| POPDC3                 | 6q21                | -0.05645 | 0.27108  | 0.389337801 |
| RAB6D                  | 2q21.1              | -0.05644 | 0.271162 | 0.389426881 |
| IDO1                   | 8p11.21             | 0.056438 | 0.271191 | 0.389436765 |
| HSP90B1                | 12q23.3             | 0.056436 | 0.271208 | 0.389436765 |
| DTX2P1-UPK3BP1-PMS2P11 | 7q11.23             | -0.05643 | 0.271277 | 0.389508757 |
| DLEU2L                 | 1p31.3              | -0.05642 | 0.271358 | 0.389597404 |
| HSPB9                  | 17q21.2             | -0.0564  | 0.271508 | 0.389784465 |
| TAL1                   | 1p33                | -0.05639 | 0.271568 | 0.389843153 |
| STAG1                  | 3q22.3              | 0.056385 | 0.271638 | 0.389915186 |
| PI4KAP1                | 22q11.21            | -0.05638 | 0.271684 | 0.389944621 |
| ACSBG1                 | 15q25.1             | 0.056378 | 0.271698 | 0.389944621 |
| HNRNPH2                | Xq22.1              | -0.05636 | 0.271812 | 0.390081322 |
| MX1                    | 21q22.3             | 0.056356 | 0.271884 | 0.390128902 |
| SKA2                   | 17q22               | 0.056356 | 0.271887 | 0.390128902 |
| AARD                   | 8q24.11             | -0.05635 | 0.271904 | 0.390128902 |
| OR4K15                 | 14q11.2             | 0.056351 | 0.271929 | 0.390137189 |
| HIST3H2BB              | 1q42.13             | -0.05629 | 0.272459 | 0.390869776 |
| ESRG                   | 3p14.3 3p14.3       | 0.056285 | 0.272489 | 0.39088465  |
| PIWIL4                 | 11q21               | -0.05628 | 0.27257  | 0.390973141 |
| OR6C4                  | 12q13.2             | -0.05627 | 0.272656 | 0.391067595 |
| HSPA6                  | 1q23.3              | -0.05626 | 0.272706 | 0.391112169 |
| FAAH2                  | Xp11.21             | -0.05625 | 0.272824 | 0.391252875 |
| RPL34-AS1              | 4q25                | 0.056242 | 0.272856 | 0.391270694 |
| CATSPER4               | 1p36.11             | -0.05624 | 0.272902 | 0.391308247 |
| KDM4A                  | 1p34.2-p34.1        | 0.056218 | 0.273061 | 0.391488202 |
| GPI                    | 19q13.11            | 0.056217 | 0.273072 | 0.391488202 |
| IGSF10                 | 3q25.1              | -0.05621 | 0.273102 | 0.391488202 |
| NISCH                  | 3p21.1              | -0.05621 | 0.273105 | 0.391488202 |
| MED14                  | Xp11.4              | -0.0562  | 0.273247 | 0.39166327  |
| LINC00685              | Xp22.33 and Yp11.31 | -0.05619 | 0.27329  | 0.391673158 |
| DOP1A                  | 6q14.1              | -0.05619 | 0.273293 | 0.391673158 |
| AMPD2                  | 1p13.3              | -0.05617 | 0.273483 | 0.391894115 |

|            |          |          |          |             |
|------------|----------|----------|----------|-------------|
| HIRA       | 22q11.21 | 0.056168 | 0.273486 | 0.391894115 |
| C4A        | 6p21.33  | -0.05616 | 0.273525 | 0.39192149  |
| MIR4697HG  | 11q25    | -0.05614 | 0.273709 | 0.39214438  |
| S100A12    | 1q21.3   | -0.05614 | 0.27372  | 0.39214438  |
| LINC00928  | 15q26.1  | -0.05612 | 0.273909 | 0.392386787 |
| SCGN       | 6p22.2   | 0.056115 | 0.27394  | 0.392403059 |
| SLC1A2     | 11p13    | -0.05611 | 0.274005 | 0.392468109 |
| SCD5       | 4q21.22  | -0.05611 | 0.274024 | 0.392468586 |
| TTY4C      | Yq11.23  | 0.05608  | 0.274247 | 0.39275907  |
| TMCO5A     | 15q14    | 0.056075 | 0.274284 | 0.392784167 |
| CGB1       | 19q13.33 | -0.05605 | 0.274489 | 0.393049962 |
| PTPN11     | 12q24.13 | -0.05605 | 0.274526 | 0.393074943 |
| OR2A9P     | 7q35     | -0.05604 | 0.274598 | 0.393149942 |
| HTRA4      | 8p11.22  | -0.05602 | 0.274736 | 0.393319184 |
| ERCC6      | 10q11.23 | 0.056004 | 0.274894 | 0.393516842 |
| CKAP5      | 11p11.2  | -0.05599 | 0.274994 | 0.393608732 |
| PPP1R8     | 1p35.3   | -0.05599 | 0.274997 | 0.393608732 |
| ABCF1      | 6p21.33  | -0.05596 | 0.275262 | 0.393959032 |
| CLIC2      | Xq28     | 0.055958 | 0.275288 | 0.393967939 |
| OR2G3      | 1q44     | 0.05594  | 0.275443 | 0.394162381 |
| CAV1       | 7q31.2   | -0.05594 | 0.27548  | 0.394186976 |
| SLC20A2    | 8p11.21  | -0.05592 | 0.275658 | 0.394413067 |
| MED15      | 22q11.21 | 0.055906 | 0.275737 | 0.394498802 |
| ZDHHC23    | 3q13.31  | -0.05589 | 0.275875 | 0.394661938 |
| HRG        | 3q27.3   | 0.055888 | 0.275891 | 0.394661938 |
| TMPO-AS1   | 12q23.1  | 0.055884 | 0.275925 | 0.394681864 |
| KRTAP4-5   | 17q21.2  | -0.05588 | 0.275948 | 0.394687399 |
| GIP        | 17q21.32 | -0.05588 | 0.275982 | 0.394708139 |
| AKAIN1     | 18p11.31 | -0.05587 | 0.276015 | 0.39472605  |
| LEFTY2     | 1q42.12  | -0.05586 | 0.276095 | 0.394812477 |
| PLEKHM1P1  | 17q24.1  | 0.055857 | 0.27616  | 0.394877498 |
| KCNIP4-IT1 | 4p15.2   | -0.05585 | 0.276224 | 0.394941246 |
| FCER1G     | 1q23.3   | 0.055843 | 0.276279 | 0.394990759 |
| CD300LG    | 17q21.31 | 0.055834 | 0.27636  | 0.39507916  |
| KRTAP1-3   | 17q21.2  | -0.05583 | 0.27638  | 0.39507916  |
| SERTM1     | 13q13.3  | -0.05582 | 0.276458 | 0.395162116 |
| GABRA2     | 4p12     | -0.05581 | 0.276589 | 0.395322114 |
| PCDHGA5    | 5q31.3   | -0.0558  | 0.276689 | 0.395436738 |
| USP24      | 1p32.3   | 0.055768 | 0.276922 | 0.395741881 |
| KMT2C      | 7q36.1   | 0.055762 | 0.276976 | 0.395790612 |
| PSORS1C3   | 6p21.33  | 0.055741 | 0.277158 | 0.396022087 |
| LMOD2      | 7q31.32  | 0.055737 | 0.277193 | 0.396044023 |
| GIMAP4     | 7q36.1   | 0.055731 | 0.277248 | 0.39607707  |
| HIST3H2A   | 1q42.13  | -0.05573 | 0.277266 | 0.39607707  |
| C14ORF180  | 14q32.33 | 0.055728 | 0.277276 | 0.39607707  |
| IKBKB      | 8p11.21  | -0.05572 | 0.277303 | 0.396088373 |
| MILR1      | 17q23.3  | 0.055721 | 0.277328 | 0.396095066 |
| KLK2       | 19q13.33 | 0.055709 | 0.277433 | 0.3962167   |
| BHLHE23    | 20q13.33 | -0.0557  | 0.277474 | 0.396222324 |
| AP3M2      | 8p11.21  | -0.0557  | 0.277476 | 0.396222324 |
| PEX13      | 2p15     | -0.0557  | 0.277549 | 0.396297645 |
| RAD51AP1   | 12p13.32 | 0.055691 | 0.27759  | 0.39632782  |
| PCED1B     | 12q13.11 | -0.05569 | 0.277623 | 0.396347373 |
| SLC3A1     | 2p21     | 0.05568  | 0.277688 | 0.396412081 |
| MRPL1      | 4q21.1   | 0.055673 | 0.277748 | 0.396468825 |
| CPVL       | 7p14.3   | 0.055669 | 0.277781 | 0.396488382 |
| ZNF816     | 19q13.41 | -0.05566 | 0.27783  | 0.396529192 |
| RAET1G     | 6q25.1   | 0.055653 | 0.277921 | 0.396613477 |

|           |                |          |          |             |
|-----------|----------------|----------|----------|-------------|
| PTCHD3P1  | 10p11.23       | 0.055652 | 0.277928 | 0.396613477 |
| RAD21L1   | 20p13          | 0.055631 | 0.278114 | 0.396849899 |
| GATA3-AS1 | 10p14          | -0.05563 | 0.278141 | 0.396860711 |
| SYK       | 9q22.2         | -0.0556  | 0.278338 | 0.397113379 |
| DYNLL1    | 12q24.31       | -0.0556  | 0.278417 | 0.397196767 |
| FSIP1     | 15q14          | 0.055585 | 0.278509 | 0.397300074 |
| KC6       | -              | -0.05556 | 0.278704 | 0.397550136 |
| CPA1      | 7q32.2         | -0.05555 | 0.278786 | 0.397612895 |
| ARID4A    | 14q23.1        | 0.055553 | 0.278788 | 0.397612895 |
| ARRDC1    | 9q34.3         | -0.05555 | 0.278825 | 0.397637797 |
| TMED5     | 1p22.1         | 0.055544 | 0.278864 | 0.397665361 |
| CHGA      | 14q32.12       | 0.055518 | 0.279087 | 0.397954464 |
| LILRA5    | 19q13.42       | 0.055514 | 0.279121 | 0.397974647 |
| DDTL      | 22q11.23       | -0.05551 | 0.27917  | 0.398004469 |
| TRAPPC3L  | 6q22.1         | -0.05551 | 0.279199 | 0.398004469 |
| BBOX1     | 11p14.2        | -0.05551 | 0.279201 | 0.398004469 |
| PKD1L3    | 16q22.2        | 0.055499 | 0.279251 | 0.398020719 |
| SLC24A3   | 20p11.23       | -0.0555  | 0.279252 | 0.398020719 |
| HLA-DQA1  | 6p21.32        | 0.055483 | 0.279391 | 0.398189413 |
| DUXA      | 19q13.43       | -0.05548 | 0.279457 | 0.398255382 |
| CHMP1A    | 16q24.3        | -0.05546 | 0.279604 | 0.398415329 |
| GEN1      | 2p24.2         | -0.05546 | 0.279626 | 0.398415329 |
| SLCO1B1   | 12p12.1        | 0.055456 | 0.279629 | 0.398415329 |
| TNNI2     | 11p15.5        | -0.05545 | 0.27967  | 0.398445637 |
| TMEM86A   | 11p15.1        | -0.05544 | 0.279738 | 0.398514754 |
| MMS19     | 10q24.1        | 0.055407 | 0.280053 | 0.398916383 |
| CTPS1     | 1p34.2         | -0.05541 | 0.28006  | 0.398916383 |
| MAST4     | 5q12.3         | 0.055399 | 0.280126 | 0.398979604 |
| DSCAML1   | 11q23.3        | -0.0554  | 0.280144 | 0.398979604 |
| ZDBF2     | 2q33.3         | -0.05539 | 0.280169 | 0.398985879 |
| CRB1      | 1q31.3         | -0.05539 | 0.280206 | 0.399010771 |
| HTR6      | 1p36.13        | 0.055385 | 0.280241 | 0.399032211 |
| SCAF4     | 21q22.11       | 0.05538  | 0.28029  | 0.399074049 |
| ZNF512    | 2p23.3         | -0.05537 | 0.280332 | 0.399104293 |
| ZAP70     | 2q11.2         | 0.055364 | 0.280431 | 0.39921727  |
| ZZZ3      | 1p31.1         | -0.05536 | 0.28048  | 0.399258224 |
| RBMS3     | 3p24.1         | -0.05535 | 0.280531 | 0.399303111 |
| OR51B5    | 11p15.4        | -0.05535 | 0.280578 | 0.399326205 |
| LOC401127 | 4p14           | -0.05535 | 0.280587 | 0.399326205 |
| MRPS11    | 15q25.3        | 0.055335 | 0.280678 | 0.399427395 |
| MED1      | 17q12          | -0.05533 | 0.280712 | 0.399447022 |
| GBP5      | 1p22.2         | 0.055328 | 0.280742 | 0.399461316 |
| NOP16     | 5q35.2         | -0.05532 | 0.280793 | 0.39947932  |
| CLEC12A   | 12p13.31       | 0.055322 | 0.280794 | 0.39947932  |
| SRD5A1    | 5p15.31        | -0.05531 | 0.280881 | 0.399573556 |
| TEX29     | 13q34          | -0.05529 | 0.281033 | 0.399759559 |
| AARS2     | 6p21.1         | 0.055292 | 0.281051 | 0.399759559 |
| CLEC7A    | 12p13.2        | 0.055287 | 0.281099 | 0.399799171 |
| TRMO      | 9q22.33        | 0.055277 | 0.281185 | 0.399860739 |
| LINC01591 | 8q24.22        | -0.05528 | 0.281188 | 0.399860739 |
| SERPINB12 | 18q21.33       | 0.055275 | 0.281202 | 0.399860739 |
| PRKG1     | 10q11.23-q21.1 | -0.05526 | 0.281293 | 0.399961831 |
| ULK4      | 3p22.1         | 0.055261 | 0.28132  | 0.399970762 |
| CBX5      | 12q13.13       | 0.055235 | 0.281547 | 0.4002654   |
| AIF1      | 6p21.33        | 0.055226 | 0.281626 | 0.400349135 |
| CCDC9     | 19q13.32       | 0.055218 | 0.281701 | 0.400427538 |
| CLEC19A   | 16p12.3        | 0.055207 | 0.281799 | 0.400538839 |
| BCL2L13   | 22q11.21       | 0.055202 | 0.281834 | 0.400560328 |



|           |                 |          |          |             |
|-----------|-----------------|----------|----------|-------------|
| HEXA-AS1  | 15q23           | -0.0552  | 0.281858 | 0.400565144 |
| YIF1A     | 11q13.2         | -0.0552  | 0.281893 | 0.400586283 |
| IQCF3     | 3p21.2          | 0.055192 | 0.281927 | 0.400607424 |
| KRTDAP    | 19q13.12        | -0.05518 | 0.282069 | 0.400780499 |
| DGKD      | 2q37.1          | -0.05515 | 0.282319 | 0.401107566 |
| PTGES     | 9q34.11         | -0.05512 | 0.282536 | 0.401386604 |
| LINC00207 | 22q13.31        | -0.0551  | 0.28272  | 0.401608557 |
| CLEC6A    | 12p13.31        | 0.0551   | 0.282732 | 0.401608557 |
| PCDHGB6   | 5q31.3          | -0.05509 | 0.282828 | 0.401715775 |
| SLC66A1   | 1p36.13         | 0.055085 | 0.282866 | 0.401729559 |
| NEFH      | 22q12.2         | -0.05508 | 0.282878 | 0.401729559 |
| SPINK8    | 3p21.31         | 0.055053 | 0.283138 | 0.402054141 |
| TP53BP2   | 1q41            | 0.055052 | 0.283146 | 0.402054141 |
| CH25H     | 10q23.31        | -0.05505 | 0.283173 | 0.402063115 |
| ATP11C    | Xq27.1          | -0.05503 | 0.283333 | 0.402262191 |
| SCN1A     | 2q24.3          | -0.05502 | 0.283432 | 0.402374315 |
| MESTIT1   | 7q32.2          | -0.05502 | 0.283459 | 0.402383353 |
| USF2      | 19q13.12        | -0.055   | 0.283618 | 0.402581075 |
| AQP6      | 12q13.12        | -0.05498 | 0.283775 | 0.402769212 |
| XIRP2     | 2q24.3          | -0.05498 | 0.283791 | 0.402769212 |
| TSSK3     | 1p35.1          | 0.054965 | 0.283911 | 0.402889189 |
| ELAVL3    | 19p13.2         | -0.05496 | 0.283915 | 0.402889189 |
| OPHN1     | Xq12            | -0.05494 | 0.284101 | 0.403086124 |
| ACHE      | 7q22.1          | 0.054943 | 0.284105 | 0.403086124 |
| KRT19     | 17q21.2         | 0.054942 | 0.284115 | 0.403086124 |
| CAPRIN2   | 12p11.21        | -0.05492 | 0.284304 | 0.403325712 |
| HIST1H2BJ | 6p22.1          | -0.05491 | 0.284428 | 0.40347417  |
| SMAD3     | 15q22.33        | -0.05489 | 0.284559 | 0.403630709 |
| FAM20A    | 17q24.2         | -0.05488 | 0.284672 | 0.403763128 |
| USP22     | 17p11.2         | 0.054866 | 0.284782 | 0.403890204 |
| NUDT15    | 13q14.2         | -0.05486 | 0.284831 | 0.403931394 |
| OTX2      | 14q22.3         | 0.054858 | 0.284854 | 0.403935247 |
| GJB7      | 6q14.3-q15      | -0.05485 | 0.284896 | 0.403966329 |
| GPR6      | 6q21            | -0.05485 | 0.284929 | 0.403983522 |
| PPFIBP1   | 12p11.23-p11.22 | 0.054846 | 0.284954 | 0.403991477 |
| SAMD3     | 6q23.1          | -0.05484 | 0.285047 | 0.404094423 |
| GCNT2     | 6p24.3-p24.2    | 0.054819 | 0.285197 | 0.404277944 |
| A4GNT     | 3q22.3          | 0.054754 | 0.285765 | 0.405054249 |
| LY6E-DT   | 8q24.3          | -0.05475 | 0.285808 | 0.405081516 |
| VPS26A    | 10q22.1         | 0.054748 | 0.285824 | 0.405081516 |
| TBK1      | 12q14.2         | 0.054735 | 0.285936 | 0.405211513 |
| LINC00426 | 13q12.3         | 0.054723 | 0.286045 | 0.405336725 |
| FIGNL2    | 12q13.13        | -0.05471 | 0.286125 | 0.405421766 |
| DENND6A   | 3p14.3          | -0.0547  | 0.286252 | 0.405572041 |
| FAM136BP  | 6p25.2          | -0.05469 | 0.286317 | 0.40563558  |
| STOM      | 9q33.2          | 0.05468  | 0.286417 | 0.405748788 |
| SH3GLB1   | 1p22.3          | 0.054645 | 0.286729 | 0.406161642 |
| KRTAP10-7 | 21q22.3         | -0.05462 | 0.286918 | 0.406389719 |
| COBL      | 7p12.1          | -0.05462 | 0.28693  | 0.406389719 |
| SMARCC2   | 12q13.2         | -0.05462 | 0.286985 | 0.406439114 |
| MAPK10    | 4q21.3          | -0.05461 | 0.287016 | 0.406446152 |
| DNMBP-AS1 | 10q24.2         | 0.054611 | 0.287031 | 0.406446152 |
| LINC02159 | 5q34            | -0.0546  | 0.287152 | 0.406588564 |
| OR51A2    | 11p15.4         | 0.054589 | 0.287226 | 0.406634902 |
| SIN3A     | 15q24.2         | 0.054588 | 0.287231 | 0.406634902 |
| MS4A6E    | 11q12.2         | 0.054585 | 0.287264 | 0.406634902 |
| RASL10A   | 22q12.2         | -0.05458 | 0.287266 | 0.406634902 |
| MMP25     | 16p13.3         | 0.054577 | 0.28733  | 0.406696922 |

|           |          |          |          |             |
|-----------|----------|----------|----------|-------------|
| ANGPT4    | 20p13    | -0.05457 | 0.287378 | 0.406736837 |
| PMEL      | 12q13.2  | -0.05457 | 0.287421 | 0.406768802 |
| RNASE8    | 14q11.2  | 0.054558 | 0.287503 | 0.406856247 |
| CLEC4A    | 12p13.31 | 0.054551 | 0.287559 | 0.406906695 |
| TDO2      | 4q32.1   | -0.05455 | 0.287596 | 0.40693055  |
| LIMD2     | 17q23.3  | -0.05454 | 0.287661 | 0.406993459 |
| CEMP1     | 16p13.3  | -0.05453 | 0.287711 | 0.407034805 |
| LOC283856 | 16q13    | -0.05453 | 0.287738 | 0.407045161 |
| ALS2      | 2q33.1   | 0.054527 | 0.28777  | 0.40706088  |
| SLC6A5    | 11p15.1  | 0.054507 | 0.287952 | 0.407289374 |
| CDH15     | 16q24.3  | 0.0545   | 0.288014 | 0.407349065 |
| CPLANE1   | 5p13.2   | -0.05441 | 0.288806 | 0.408440108 |
| SLC6A15   | 12q21.31 | -0.0544  | 0.288932 | 0.408589732 |
| MRPS30    | 5p12     | -0.05436 | 0.289278 | 0.40903856  |
| MYBPH     | 1q32.1   | -0.05436 | 0.289291 | 0.40903856  |
| LINC00909 | 18q22.3  | 0.054347 | 0.289366 | 0.409116772 |
| SERPINB3  | 18q21.33 | 0.054328 | 0.289537 | 0.409329157 |
| DENND1A   | 9q33.3   | -0.05431 | 0.28972  | 0.409559545 |
| NXP2      | 2q22.1   | -0.0543  | 0.289757 | 0.409581947 |
| EBF2      | 8p21.2   | -0.0543  | 0.289816 | 0.409618465 |
| OR4A47    | 11p11.2  | -0.0543  | 0.289823 | 0.409618465 |
| U2AF1L4   | 19q13.12 | -0.05427 | 0.290054 | 0.40991495  |
| SLC30A10  | 1q41     | 0.054267 | 0.290079 | 0.409914975 |
| MAP1LC3C  | 1q43     | -0.05427 | 0.290095 | 0.409914975 |
| DEPDC4    | 12q23.1  | -0.05426 | 0.290156 | 0.409966952 |
| SUPT20HL2 | Xp22.11  | -0.05426 | 0.290172 | 0.409966952 |
| PCDHA13   | 5q31.3   | -0.05423 | 0.290421 | 0.410288796 |
| ERICH4    | 19q13.2  | 0.054225 | 0.290456 | 0.410310216 |
| NEURL1B   | 5q35.1   | -0.05421 | 0.290589 | 0.41046819  |
| NUTM2D    | 10q23.2  | -0.0542  | 0.290667 | 0.410546123 |
| NIN       | 14q22.1  | -0.0542  | 0.2907   | 0.410546123 |
| NFE2L1    | 17q21.32 | 0.054195 | 0.290723 | 0.410546123 |
| FAM124A   | 13q14.3  | -0.05419 | 0.290726 | 0.410546123 |
| INSM2     | 14q13.2  | 0.054192 | 0.290752 | 0.410553892 |
| NME8      | 7p14.1   | -0.05416 | 0.291013 | 0.410883483 |
| DBR1      | 3q22.3   | -0.05416 | 0.291026 | 0.410883483 |
| CTR9      | 11p15.4  | 0.054142 | 0.291191 | 0.4110615   |
| NR2F1-AS1 | 5q15     | -0.05414 | 0.291193 | 0.4110615   |
| CTSC      | 11q14.2  | -0.05414 | 0.291247 | 0.411108465 |
| TBC1D19   | 4p15.2   | -0.05413 | 0.291324 | 0.41115259  |
| ZNF814    | 19q13.43 | 0.054124 | 0.291353 | 0.41115259  |
| LINC00320 | 21q21.1  | -0.05412 | 0.291354 | 0.41115259  |
| MFN1      | 3q26.33  | 0.054124 | 0.291361 | 0.41115259  |
| COL13A1   | 10q22.1  | -0.05411 | 0.291439 | 0.411234822 |
| NBPF10    | 1q21.1   | 0.054093 | 0.291634 | 0.411479848 |
| PLET1     | 11q23.1  | 0.054077 | 0.291776 | 0.411651725 |
| NHSL2     | Xq13.1   | -0.05406 | 0.291958 | 0.411879128 |
| ODF4      | 17p13.1  | 0.054026 | 0.292233 | 0.412220715 |
| SOX10     | 22q13.1  | -0.05402 | 0.292249 | 0.412220715 |
| FBH1      | 10p15.1  | 0.054022 | 0.292269 | 0.412220715 |
| TTC4      | 1p32.3   | -0.05402 | 0.292282 | 0.412220715 |
| GRIK2     | 6q16.3   | -0.05402 | 0.292312 | 0.412233585 |
| PCDHB16   | 5q31.3   | -0.05399 | 0.292561 | 0.412556606 |
| ZNF878    | 19p13.2  | 0.053978 | 0.292666 | 0.412674248 |
| NDUFB4    | 3q13.33  | -0.05397 | 0.292721 | 0.412705912 |
| UBXN6     | 19p13.3  | 0.05397  | 0.292729 | 0.412705912 |
| SNX3      | 6q21     | -0.05395 | 0.29287  | 0.412875306 |
| LTC4S     | 5q35.3   | -0.05395 | 0.292891 | 0.412875427 |

|           |                 |          |          |             |
|-----------|-----------------|----------|----------|-------------|
| L3MBTL2   | 22q13.2         | 0.053941 | 0.292993 | 0.412991194 |
| TCHH      | 1q21.3          | -0.05392 | 0.293181 | 0.413225973 |
| TERT      | 5p15.33         | -0.05391 | 0.293289 | 0.413349193 |
| C15ORF61  | 15q23           | -0.0539  | 0.293365 | 0.413405287 |
| MAP3K1    | 5q11.2          | 0.053899 | 0.29337  | 0.413405287 |
| SCARNA21  | 17p13.1         | -0.05385 | 0.293812 | 0.413981303 |
| SMAD5     | 5q31.1          | 0.053849 | 0.29382  | 0.413981303 |
| NTSR1     | 20q13.33        | -0.05384 | 0.293929 | 0.414106119 |
| SLAMF8    | 1q23.2          | 0.053779 | 0.294448 | 0.414808614 |
| SLC26A6   | 3p21.31         | 0.053768 | 0.294543 | 0.414913051 |
| DYDC1     | 10q23.1         | -0.05376 | 0.294622 | 0.414994536 |
| EMILIN2   | 18p11.32-p11.31 | 0.053748 | 0.294725 | 0.415111057 |
| TP53INP2  | 20q11.22        | 0.053741 | 0.294791 | 0.415145418 |
| TMEM140   | 7q33            | 0.053741 | 0.294791 | 0.415145418 |
| TCEAL3    | Xq22.2          | -0.05373 | 0.294896 | 0.41526354  |
| PRPF38B   | 1p13.3          | -0.05372 | 0.294946 | 0.415305279 |
| IGSF9B    | 11q25           | -0.05372 | 0.294969 | 0.415308675 |
| NFKBIA    | 14q13.2         | 0.053716 | 0.295012 | 0.415339613 |
| CCR8      | 3p22.1          | 0.053713 | 0.29504  | 0.41535034  |
| XIST      | Xq13.2          | -0.05368 | 0.295308 | 0.415698134 |
| FAT4      | 4q28.1          | -0.05367 | 0.2954   | 0.415785053 |
| NDUFA10   | 2q37.3          | 0.053672 | 0.295411 | 0.415785053 |
| PIN1P1    | 1p31.1          | -0.05367 | 0.295471 | 0.415837306 |
| ADAM30    | 1p12            | 0.053663 | 0.29549  | 0.415837306 |
| OR51A7    | 11p15.4         | 0.05366  | 0.295521 | 0.415851997 |
| CRYBB1    | 22q12.1         | -0.05366 | 0.295561 | 0.415878003 |
| MYH4      | 17p13.1         | -0.05364 | 0.295683 | 0.416020451 |
| OR52K2    | 11p15.4         | -0.05362 | 0.295884 | 0.416275274 |
| HCG4B     | 6p22.1          | 0.053593 | 0.296123 | 0.416572763 |
| SRP19     | 5q22.2          | 0.053591 | 0.296138 | 0.416572763 |
| NOX5      | 15q23           | -0.05359 | 0.296173 | 0.416593253 |
| PCARE     | 2p23.2          | -0.05357 | 0.296357 | 0.416822673 |
| SMPD2     | 6q21            | -0.05355 | 0.296478 | 0.416963379 |
| EFR3A     | 8q24.22         | -0.05354 | 0.296642 | 0.417159232 |
| MAPT-AS1  | 17q21.31        | 0.053534 | 0.296659 | 0.417159232 |
| MAFK      | 7p22.3          | 0.053523 | 0.296752 | 0.417261174 |
| INTS5     | 11q12.3         | -0.0535  | 0.296923 | 0.417472654 |
| ZMAT2     | 5q31.3          | -0.05349 | 0.297032 | 0.417584507 |
| LOC153910 | 6q24.2          | -0.05349 | 0.29706  | 0.417584507 |
| PRRG1     | Xp21.1          | 0.053489 | 0.297065 | 0.417584507 |
| ANAPC10   | 4q31.21         | -0.05348 | 0.297133 | 0.417650991 |
| PWRN1     | 15q11.2         | -0.05347 | 0.297193 | 0.417706086 |
| TMEM212   | 3q26.31         | 0.053458 | 0.297346 | 0.417869527 |
| ARPC2     | 2q35            | -0.05346 | 0.297365 | 0.417869527 |
| IDO2      | 8p11.21         | 0.053455 | 0.297372 | 0.417869527 |
| SNORA68   | 19p13.11        | 0.053452 | 0.2974   | 0.41787854  |
| GREM2     | 1q43            | -0.05344 | 0.297516 | 0.418012752 |
| PTX4      | 16p13.3         | 0.053433 | 0.29757  | 0.41805986  |
| MAML1     | 5q35.3          | 0.053425 | 0.29764  | 0.418128273 |
| SPEM2     | 17p13.1         | -0.05341 | 0.297803 | 0.418299402 |
| ZNF114    | 19q13.33        | -0.05341 | 0.297804 | 0.418299402 |
| FAM189A1  | 15q13.1         | 0.053395 | 0.297917 | 0.418429732 |
| LAMB4     | 7q31.1          | 0.053348 | 0.298337 | 0.418989245 |
| XYLT1     | 16p12.3         | 0.053344 | 0.298376 | 0.418994752 |
| SLC25A52  | 18q12.1         | 0.053343 | 0.298382 | 0.418994752 |
| CDH23     | 10q22.1         | -0.05334 | 0.298442 | 0.419049045 |
| TEDDM1    | 1q25.3          | 0.053334 | 0.298469 | 0.419058163 |
| CYC1      | 8q24.3          | -0.05333 | 0.29854  | 0.419127474 |

|             |          |          |          |             |
|-------------|----------|----------|----------|-------------|
| CTSB        | 8p23.1   | 0.05332  | 0.298592 | 0.41917214  |
| PCDHA10     | 5q31.3   | -0.05331 | 0.298697 | 0.419266965 |
| UBE2S       | 19q13.42 | -0.05331 | 0.298702 | 0.419266965 |
| OR13D1      | 9q31.1   | 0.053284 | 0.298924 | 0.419548886 |
| SLC14A1     | 18q12.3  | -0.05327 | 0.299036 | 0.419677307 |
| JMJD1C      | 10q21.3  | -0.05325 | 0.2992   | 0.419878502 |
| ACSM4       | 12p13.31 | 0.053247 | 0.299256 | 0.419914255 |
| SSX8P       | Xp11.22  | 0.053246 | 0.299268 | 0.419914255 |
| LINC01845   | 5q33.3   | 0.05322  | 0.299505 | 0.420184428 |
| FAM102A     | 9q34.11  | 0.053218 | 0.299519 | 0.420184428 |
| AATBC       | 21q22.3  | -0.05322 | 0.299523 | 0.420184428 |
| ADH5        | 4q23     | 0.053193 | 0.299747 | 0.420468136 |
| BTC         | 4q13.3   | 0.053176 | 0.299903 | 0.420631799 |
| FASTKD5     | 20p13    | 0.053176 | 0.299905 | 0.420631799 |
| CNOT4       | 7q33     | -0.05317 | 0.299952 | 0.420668296 |
| ZCCHC13     | Xq13.2   | 0.053166 | 0.299997 | 0.42070153  |
| SLC37A3     | 7q34     | -0.05315 | 0.300097 | 0.420812757 |
| KCNJ9       | 1q23.2   | -0.05315 | 0.300137 | 0.420838798 |
| C3ORF38     | 3p11.1   | -0.05314 | 0.300221 | 0.420927003 |
| PPP1R14D    | 15q15.1  | -0.05314 | 0.300268 | 0.420963512 |
| DHX8        | 17q21.31 | -0.05313 | 0.300303 | 0.420983529 |
| KCNG1       | 20q13.13 | -0.05312 | 0.300429 | 0.421130629 |
| HLA-DRB1    | 6p21.32  | 0.053107 | 0.300533 | 0.421246289 |
| KIF2C       | 1p34.1   | 0.053087 | 0.300715 | 0.421472608 |
| PRDM2       | 1p36.21  | -0.05308 | 0.300739 | 0.421476089 |
| COQ10B      | 2q33.1   | 0.053082 | 0.30076  | 0.421476893 |
| MIAT        | 22q12.1  | 0.053072 | 0.300853 | 0.421576703 |
| MAPKAPK2    | 1q32.1   | 0.053064 | 0.300927 | 0.421610046 |
| NDFIP2      | 13q31.1  | -0.05306 | 0.300953 | 0.421610046 |
| EBF4        | 20p13    | -0.05306 | 0.300961 | 0.421610046 |
| BICDL2      | 16p13.3  | -0.05306 | 0.300961 | 0.421610046 |
| TXNRD2      | 22q11.21 | -0.05305 | 0.301029 | 0.42165011  |
| ADAMTSL5    | 19p13.3  | 0.053052 | 0.301031 | 0.42165011  |
| DCP1A       | 3p21.1   | -0.05305 | 0.301073 | 0.421678397 |
| SPI1        | 11p11.2  | 0.053042 | 0.301126 | 0.421707462 |
| CCDC107     | 9p13.3   | 0.053041 | 0.301135 | 0.421707462 |
| MITF        | 3p13     | -0.05302 | 0.301367 | 0.422002693 |
| ZNF485      | 10q11.21 | -0.053   | 0.301477 | 0.422127302 |
| OR13C8      | 9q31.1   | 0.052996 | 0.301544 | 0.422190928 |
| VEGFD       | Xp22.2   | -0.05299 | 0.301643 | 0.422300778 |
| FOXL1       | 16q24.1  | -0.05298 | 0.301731 | 0.422369966 |
| STAB1       | 3p21.1   | 0.052975 | 0.301735 | 0.422369966 |
| THTPA       | 14q11.2  | -0.05294 | 0.302026 | 0.422748111 |
| OXER1       | 2p21     | -0.05293 | 0.302121 | 0.422835058 |
| ADGRL1      | 19p13.12 | -0.05293 | 0.302131 | 0.422835058 |
| SPA17       | 11q24.2  | 0.052922 | 0.302217 | 0.422926762 |
| IRF9        | 14q12    | 0.05291  | 0.302331 | 0.423045961 |
| RERGL       | 12p12.3  | -0.05291 | 0.302351 | 0.423045961 |
| SNORA4      | 3q27.3   | 0.052906 | 0.302366 | 0.423045961 |
| C10ORF113   | 10p12.31 | -0.0529  | 0.302421 | 0.42309402  |
| FXN         | 9q21.11  | 0.052894 | 0.302473 | 0.423129096 |
| CDK5RAP3    | 17q21.32 | -0.05289 | 0.302489 | 0.423129096 |
| SNORD115-26 | 15q11.2  | -0.05289 | 0.302521 | 0.423129096 |
| SDR9C7      | 12q13.3  | -0.05289 | 0.302531 | 0.423129096 |
| TARDBP      | 1p36.22  | -0.05287 | 0.302732 | 0.423380213 |
| INAFM1      | 19q13.32 | -0.05286 | 0.302773 | 0.423408552 |
| VAT1        | 17q21.31 | -0.05284 | 0.302943 | 0.423616151 |
| DBNDD1      | 16q24.3  | -0.05284 | 0.30297  | 0.423625188 |

|              |              |          |          |             |
|--------------|--------------|----------|----------|-------------|
| DRG2         | 17p11.2      | -0.05284 | 0.302994 | 0.42362871  |
| TSPAN19      | 12q21.31     | -0.05283 | 0.303063 | 0.423696474 |
| TMCO2        | 1p34.2       | -0.05278 | 0.303534 | 0.424312588 |
| P2RX7        | 12q24.31     | -0.05278 | 0.303547 | 0.424312588 |
| KRTAP10-9    | 21q22.3      | -0.05276 | 0.303713 | 0.424499095 |
| AIMP1        | 4q24         | -0.05276 | 0.303722 | 0.424499095 |
| IGFBP1       | 7p12.3       | -0.05275 | 0.303786 | 0.424558832 |
| C3ORF62      | 3p21.31      | 0.052733 | 0.303956 | 0.424741685 |
| LALBA        | 12q13.11     | 0.052732 | 0.30396  | 0.424741685 |
| GGNBP2       | 17q12        | -0.05271 | 0.304145 | 0.424971709 |
| LTF          | 3p21.31      | -0.05271 | 0.304205 | 0.425024924 |
| HLA-DRB5     | 6p21.32      | 0.052682 | 0.304424 | 0.425302111 |
| QRICH2       | 17q25.1      | -0.05267 | 0.304509 | 0.42539129  |
| FAM199X      | Xq22.2       | -0.05267 | 0.304563 | 0.425409401 |
| DDC          | 7p12.2-p12.1 | -0.05267 | 0.304565 | 0.425409401 |
| CCDC7        | 10p11.22     | 0.052661 | 0.30461  | 0.425442944 |
| RBSN         | 3p25.1       | -0.05266 | 0.304662 | 0.425485544 |
| LINC00167    | 11q24.3      | -0.05264 | 0.304761 | 0.425576267 |
| ATP6V0E2-AS1 | 7q36.1       | 0.052642 | 0.304785 | 0.425576267 |
| ALKBH1       | 14q24.3      | -0.05264 | 0.304791 | 0.425576267 |
| C5ORF60      | 5q35.3       | -0.05264 | 0.304835 | 0.425608797 |
| ATP7B        | 13q14.3      | 0.052605 | 0.305125 | 0.425984369 |
| MYOM1        | 18p11.31     | -0.0526  | 0.305207 | 0.426068084 |
| HRH3         | 20q13.33     | -0.05258 | 0.305362 | 0.426254716 |
| CDYL         | 6p25.1       | -0.05257 | 0.305494 | 0.426410042 |
| PYY2         | 17q11.2      | -0.05256 | 0.305556 | 0.426442238 |
| KCNMB2       | 3q26.32      | -0.05256 | 0.305581 | 0.426442238 |
| OR5B3        | 11q12.1      | -0.05256 | 0.305581 | 0.426442238 |
| SCMH1        | 1p34.2       | -0.05255 | 0.305613 | 0.42645725  |
| DCST2        | 1q21.3       | 0.052542 | 0.305707 | 0.426558392 |
| PDE6H        | 12p12.3      | -0.05252 | 0.305921 | 0.426803503 |
| C10ORF71     | 10q11.23     | -0.05252 | 0.305925 | 0.426803503 |
| USP34        | 2p15         | -0.05251 | 0.306028 | 0.426917135 |
| TCERG1L      | 10q26.3      | -0.0525  | 0.30609  | 0.42694431  |
| EPM2A        | 6q24.3       | 0.0525   | 0.306096 | 0.42694431  |
| GJA5         | 1q21.2       | -0.0525  | 0.306111 | 0.42694431  |
| ATP6V0A2     | 12q24.31     | -0.05249 | 0.306177 | 0.427005992 |
| PANK1        | 10q23.31     | -0.05249 | 0.306203 | 0.427012271 |
| NOX1         | Xq22.1       | -0.05248 | 0.306302 | 0.427080978 |
| THEM4        | 1q21.3       | 0.052478 | 0.306302 | 0.427080978 |
| EI24         | 11q24.2      | 0.052476 | 0.306316 | 0.427080978 |
| HYAL6P       | 7q31.32      | 0.052465 | 0.306418 | 0.427158007 |
| SSBP3        | 1p32.3       | 0.052464 | 0.306425 | 0.427158007 |
| ABCB8        | 7q36.1       | 0.052463 | 0.306435 | 0.427158007 |
| PCDHGB2      | 5q31.3       | -0.05245 | 0.306525 | 0.427252916 |
| APPL1        | 3p14.3       | 0.052439 | 0.306662 | 0.42741442  |
| C1QTNF7      | 4p15.32      | -0.05243 | 0.306767 | 0.427512908 |
| CYB5R1       | 1q32.1       | -0.05243 | 0.306775 | 0.427512908 |
| DMRTC2       | 19q13.2      | -0.05242 | 0.306804 | 0.427523036 |
| LRRC39       | 1p21.2       | -0.05242 | 0.30687  | 0.427584284 |
| HOXD3        | 2q31.1       | 0.052414 | 0.306891 | 0.427584284 |
| LSM2         | 6p21.33      | -0.0524  | 0.306996 | 0.427701599 |
| NR2F1        | 5q15         | -0.05239 | 0.307096 | 0.427810468 |
| FAM180B      | 11p11.2      | -0.05237 | 0.307268 | 0.427985749 |
| SKAP1        | 17q21.32     | -0.05237 | 0.307283 | 0.427985749 |
| EPX          | 17q22        | -0.05237 | 0.307286 | 0.427985749 |
| KCNA10       | 1p13.3       | -0.05237 | 0.307325 | 0.428010278 |
| BRWD3        | Xq21.1       | -0.05235 | 0.307482 | 0.428188762 |

|            |                |          |          |             |
|------------|----------------|----------|----------|-------------|
| TINAGL1    | 1p35.2         | -0.05235 | 0.307514 | 0.428188762 |
| GCOM1      | 15q21.3        | -0.05234 | 0.307532 | 0.428188762 |
| NSG1       | 4p16.3         | 0.052342 | 0.307558 | 0.428188762 |
| RGS2       | 1q31.2         | 0.052342 | 0.30756  | 0.428188762 |
| TSPY2      | Yp11.2         | 0.052334 | 0.307628 | 0.428254776 |
| KLC2       | 11q13.2        | 0.052309 | 0.307859 | 0.428543336 |
| SHMT2      | 12q13.3        | 0.052307 | 0.307878 | 0.428543336 |
| DEFA5      | 8p23.1         | -0.05228 | 0.308085 | 0.428801686 |
| LINC02694  | 15q14          | 0.052279 | 0.308138 | 0.428835883 |
| LHCGR      | 2p16.3         | -0.05228 | 0.308153 | 0.428835883 |
| ZNF267     | 16p11.2        | -0.05227 | 0.308245 | 0.428934895 |
| GPX3       | 5q33.1         | -0.05225 | 0.308369 | 0.429077243 |
| GCNT7      | 20q13.31       | -0.05225 | 0.308455 | 0.429167282 |
| ANKRD34C   | 15q25.1        | -0.05222 | 0.308704 | 0.42948355  |
| PICK1      | 22q13.1        | 0.052182 | 0.309036 | 0.429897257 |
| ETV7       | 6p21.31        | 0.052181 | 0.309052 | 0.429897257 |
| GPR20      | 8q24.3         | 0.052179 | 0.309066 | 0.429897257 |
| TXNDC5     | 6p24.3         | 0.052177 | 0.30909  | 0.429901293 |
| BHMT       | 5q14.1         | -0.05216 | 0.309203 | 0.430027155 |
| DIO1       | 1p32.3         | 0.052162 | 0.309226 | 0.430027155 |
| PCDHGA1    | 5q31.3         | 0.05216  | 0.309245 | 0.430027155 |
| SHISA7     | 19q13.42       | -0.05215 | 0.309374 | 0.430176164 |
| CCDC33     | 15q24.1        | 0.052121 | 0.309607 | 0.430470528 |
| SERPINB2   | 18q21.33-q22.1 | 0.052113 | 0.309678 | 0.430539557 |
| LIMS3      | 2q13           | -0.05211 | 0.309727 | 0.43057834  |
| YBX3P1     | 16p11.2        | -0.05209 | 0.309856 | 0.430727594 |
| TRIM21     | 11p15.4        | 0.052088 | 0.30991  | 0.430772877 |
| KCNQ3      | 8q24.22        | 0.052013 | 0.310609 | 0.431714586 |
| RPS12      | 6q23.2         | -0.05199 | 0.310816 | 0.431967947 |
| FAM172A    | 5q15           | -0.05199 | 0.310842 | 0.431967947 |
| PAK1       | 11q13.5-q14.1  | 0.051987 | 0.310856 | 0.431967947 |
| TUBA8      | 22q11.21       | -0.05198 | 0.310955 | 0.432074594 |
| TANC1      | 2q24.2         | 0.051966 | 0.311049 | 0.432175677 |
| SLC52A3    | 20p13          | -0.05196 | 0.311085 | 0.432195892 |
| CNTRL      | 9q33.2         | 0.051955 | 0.311149 | 0.432253059 |
| CENPW      | 6q22.32        | -0.05195 | 0.31117  | 0.432253059 |
| PCOTH      | 13q12.12       | -0.05195 | 0.31122  | 0.432265609 |
| OPLAH      | 8q24.3         | -0.05195 | 0.311222 | 0.432265609 |
| GANAB      | 11q12.3        | -0.05193 | 0.311346 | 0.432408549 |
| ASPDH      | 19q13.33       | -0.05193 | 0.311394 | 0.432444925 |
| NAA25      | 12q24.13       | -0.05192 | 0.311477 | 0.432529892 |
| LYSMD1     | 1q21.3         | -0.0519  | 0.311625 | 0.4326868   |
| WDR72      | 15q21.3        | 0.051903 | 0.311633 | 0.4326868   |
| DDX6       | 11q23.3        | 0.051895 | 0.31171  | 0.43276356  |
| KIFC3      | 16q21          | -0.05185 | 0.312124 | 0.433308622 |
| DEFB119    | 20q11.21       | -0.05184 | 0.312232 | 0.43342783  |
| COA3       | 17q21.2        | -0.05181 | 0.312474 | 0.43373461  |
| OR51E1     | 11p15.4        | -0.0518  | 0.312561 | 0.433824714 |
| ENDOG      | 9q34.11        | 0.051794 | 0.312652 | 0.433920417 |
| GSK3A      | 19q13.2        | 0.051791 | 0.31268  | 0.433926274 |
| ADAD1      | 4q27           | -0.05179 | 0.312699 | 0.433926274 |
| KLHL8      | 4q22.1         | 0.05177  | 0.312883 | 0.434151671 |
| ATP2B1-AS1 | 12q21.33       | 0.051765 | 0.312923 | 0.434154138 |
| PCDHA9     | 5q31.3         | -0.05176 | 0.312928 | 0.434154138 |
| CGRRF1     | 14q22.2        | 0.051748 | 0.313089 | 0.434346629 |
| LRRC71     | 1q23.1         | -0.05173 | 0.313231 | 0.434513407 |
| RGS21      | 1q31.2         | 0.051726 | 0.313292 | 0.434558412 |
| KPNA1      | 3q21.1         | -0.05172 | 0.313306 | 0.434558412 |

|              |                 |          |          |             |
|--------------|-----------------|----------|----------|-------------|
| ANKRD42      | 11q14.1         | 0.05172  | 0.313347 | 0.43458426  |
| MVD          | 16q24.2         | 0.051718 | 0.313369 | 0.434584934 |
| MYO3A        | 10p12.1         | 0.051712 | 0.313426 | 0.434633475 |
| PODXL        | 7q32.3          | 0.0517   | 0.313532 | 0.434751332 |
| NLGN1        | 3q26.31         | -0.0517  | 0.313561 | 0.434761125 |
| LINC00608    | 2q35            | 0.05168  | 0.313728 | 0.434962272 |
| ZXDB         | Xp11.21         | -0.05166 | 0.313884 | 0.435147931 |
| RBFA         | 18q23           | 0.051655 | 0.313954 | 0.435215783 |
| SLC38A7      | 16q21           | 0.05165  | 0.314009 | 0.435261244 |
| NR4A3        | 9q31.1          | 0.05163  | 0.314197 | 0.435469738 |
| C22ORF46     | 22q13.2         | 0.051629 | 0.314203 | 0.435469738 |
| PRDM16       | 1p36.32         | 0.051619 | 0.314296 | 0.435568457 |
| GTF3C1       | 16p12.1         | -0.05161 | 0.314352 | 0.435616735 |
| SLC66A3      | 2p25.1          | -0.05161 | 0.314397 | 0.435623025 |
| GRID2        | 4q22.1-q22.2    | 0.051608 | 0.3144   | 0.435623025 |
| AKR1D1       | 7q33            | 0.051598 | 0.314489 | 0.435697794 |
| MROH7        | 1p32.3          | 0.051598 | 0.314498 | 0.435697794 |
| TIMM23       | 10q11.22        | -0.05159 | 0.314546 | 0.435734912 |
| MRGPRX1      | 11p15.1 11      | 0.051589 | 0.314578 | 0.435749201 |
| IFNA1        | 9p21.3          | 0.051581 | 0.314651 | 0.435819329 |
| SNORA23      | 11p15.4         | -0.05157 | 0.314742 | 0.435883928 |
| CYCS         | 7p15.3          | 0.051571 | 0.314749 | 0.435883928 |
| BCAN         | 1q23.1          | -0.05157 | 0.314763 | 0.435883928 |
| HDAC4        | 2q37.3          | -0.05156 | 0.314813 | 0.43592382  |
| OR2T8        | 1q44            | 0.051552 | 0.314926 | 0.436049425 |
| SMS          | Xp22.11         | -0.05153 | 0.315155 | 0.436337076 |
| ZNF493       | 19p12           | -0.05152 | 0.315259 | 0.436409941 |
| LINC02593    | 1p36.33         | -0.05152 | 0.315267 | 0.436409941 |
| HTR1F        | 3p11.2-p11.1    | 0.051515 | 0.315273 | 0.436409941 |
| PDCD6        | 5p15.33         | 0.051512 | 0.315305 | 0.436423842 |
| LOC100268168 | 5q35.1          | -0.05149 | 0.315544 | 0.436724463 |
| MYO10        | 5p15.1          | -0.05148 | 0.315581 | 0.436744794 |
| LINC01553    | 10q21.2         | 0.051478 | 0.31562  | 0.436769553 |
| IRGQ         | 19q13.31        | -0.05145 | 0.315852 | 0.437060265 |
| TUSC7        | 3q13.31         | -0.05144 | 0.315938 | 0.437148417 |
| B3GNTL1      | 17q25.3         | -0.05142 | 0.316134 | 0.437368098 |
| TRIM33       | 1p13.2          | 0.051423 | 0.31614  | 0.437368098 |
| RPP25        | 15q24.2         | 0.051415 | 0.316215 | 0.437441729 |
| CC2D1A       | 19p13.12        | 0.051412 | 0.31624  | 0.437445195 |
| CNTN6        | 3p26.3          | -0.05139 | 0.31641  | 0.437620152 |
| WDR64        | 1q43            | 0.051394 | 0.31641  | 0.437620152 |
| MXD3         | 5q35.3          | 0.051389 | 0.316457 | 0.437654895 |
| BMP8B        | 1p34.2          | -0.05138 | 0.316568 | 0.437768402 |
| OR3A3        | 17p13.2         | 0.051376 | 0.316583 | 0.437768402 |
| CT47A11      | Xq24            | -0.05134 | 0.316953 | 0.438249857 |
| SLC16A4      | 1p13.3          | -0.0513  | 0.317265 | 0.438652007 |
| NCOR1P1      | 20p11.1         | -0.0513  | 0.317325 | 0.43870403  |
| SLC35F4      | 14q22.3-q23.1   | -0.05129 | 0.31737  | 0.438735744 |
| USP2         | 11q23.3         | 0.051286 | 0.317434 | 0.438794507 |
| UPF2         | 10p14           | 0.051279 | 0.317495 | 0.438848537 |
| MRPL27       | 17q21.33        | 0.051258 | 0.317695 | 0.439093886 |
| GPR152       | 11q13.2         | 0.051228 | 0.317985 | 0.439464455 |
| UNC13A       | 19p13.11        | 0.051217 | 0.318086 | 0.439573456 |
| FZR1         | 19p13.3         | -0.0512  | 0.318224 | 0.439734575 |
| NAPA         | 19q13.32-q13.33 | 0.051199 | 0.318251 | 0.439740833 |
| WDR60        | 7q36.3          | 0.051191 | 0.318327 | 0.439816033 |
| MALAT1       | 11q13.1         | -0.05119 | 0.318367 | 0.439840629 |
| RGS7         | 1q43 1q23.1     | 0.051169 | 0.318537 | 0.440045784 |

|           |               |          |          |             |
|-----------|---------------|----------|----------|-------------|
| XKR5      | 8p23.1        | -0.05117 | 0.318574 | 0.440066193 |
| NAMPT     | 7q22.3        | 0.051162 | 0.318609 | 0.440084684 |
| NUFIP2    | 17q11.2       | -0.05116 | 0.31864  | 0.440096577 |
| SNORA13   | 5q22.1        | 0.051156 | 0.318665 | 0.440100507 |
| TP53I3    | 2p23.3        | 0.051147 | 0.31875  | 0.440187961 |
| SERPINB11 | 18q21.33      | -0.05114 | 0.318819 | 0.44023147  |
| MAP3K4    | 6q26          | -0.05114 | 0.318825 | 0.44023147  |
| OR6W1P    | 7q34          | 0.051101 | 0.319186 | 0.440698441 |
| RAB41     | Xq13.1        | -0.05107 | 0.319472 | 0.441062872 |
| CWC27     | 5q12.3        | -0.05107 | 0.319505 | 0.441078826 |
| ACOT12    | 5q14.1        | 0.05106  | 0.319574 | 0.441143097 |
| SNORA15   | 7p11.2        | -0.05104 | 0.319742 | 0.441344668 |
| CNNM2     | 10q24.32      | 0.051035 | 0.31981  | 0.441396572 |
| WNT9A     | 1q42.13       | 0.051034 | 0.319824 | 0.441396572 |
| OARD1     | 6p21.1        | 0.051029 | 0.319866 | 0.441424554 |
| FGD5      | 3p25.1        | -0.05102 | 0.319971 | 0.441539464 |
| SPATS1    | 6p21.1        | 0.051003 | 0.320114 | 0.441706057 |
| IFNA5     | 9p21.3        | 0.050994 | 0.320197 | 0.441773155 |
| OR9A2     | 7q34          | 0.050993 | 0.320207 | 0.441773155 |
| OR56B1    | 11p15.4       | 0.050989 | 0.32025  | 0.441773916 |
| TMEM39A   | 3q13.33       | 0.050988 | 0.320251 | 0.441773916 |
| DOCK1     | 10q26.2       | 0.050979 | 0.320337 | 0.44186202  |
| ARHGEF40  | 14q11.2       | -0.05097 | 0.320413 | 0.441936018 |
| DNAJA1    | 9p21.1        | -0.05096 | 0.320536 | 0.442061449 |
| BTBD10    | 11p15.3       | 0.050957 | 0.320548 | 0.442061449 |
| POU2F3    | 11q23.3       | 0.050951 | 0.320612 | 0.442094344 |
| PHF3      | 6q12          | 0.050948 | 0.320634 | 0.442094344 |
| SIGLEC5   | 19q13.41      | 0.050948 | 0.320638 | 0.442094344 |
| MRPL37    | 1p32.3        | 0.050945 | 0.320667 | 0.442103429 |
| LSM6      | 4q31.22       | -0.05093 | 0.320763 | 0.442192178 |
| MEP1A     | 6p12.3        | 0.050933 | 0.320775 | 0.442192178 |
| HMGN1     | 21q22.2       | 0.050927 | 0.320833 | 0.442240791 |
| FAM138E   | 15q26.3       | 0.050922 | 0.320884 | 0.442257485 |
| SIRPB1    | 20p13         | -0.05092 | 0.320889 | 0.442257485 |
| C17ORF58  | 17q24.2       | -0.05092 | 0.320913 | 0.442259554 |
| AJM1      | 9q34.3        | 0.050904 | 0.321052 | 0.442408607 |
| IFNK      | 9p21.2        | 0.050903 | 0.321065 | 0.442408607 |
| LINC00887 | 3q29          | -0.0509  | 0.321101 | 0.442428507 |
| LINC00113 | 21q21.3       | -0.0509  | 0.32113  | 0.442437709 |
| CAMK2G    | 10q22.2       | 0.050878 | 0.321299 | 0.442639633 |
| KCNQ5     | 6q13          | -0.05086 | 0.32145  | 0.442817127 |
| COG5      | 7q22.3        | -0.05086 | 0.321489 | 0.442829369 |
| PDIA3     | 15q15.3       | 0.050857 | 0.321503 | 0.442829369 |
| RFTN1     | 3p24.3        | -0.05085 | 0.321616 | 0.442954297 |
| MGC16025  | 2q37.3        | 0.050838 | 0.321684 | 0.443017823 |
| IL12B     | 5q33.3        | 0.050831 | 0.321753 | 0.443082899 |
| MYCBPAP   | 17q21.33      | -0.05083 | 0.321789 | 0.443100924 |
| ANKRD9    | 14q32.31      | 0.050823 | 0.321825 | 0.443120623 |
| NR2E3     | 15q23         | -0.05082 | 0.321878 | 0.44316331  |
| NANOS1    | 10q26.11      | 0.050799 | 0.322057 | 0.44337909  |
| MYT1L     | 2p25.3        | -0.05077 | 0.32232  | 0.443711298 |
| TGM5      | 15q15.2       | -0.05076 | 0.322406 | 0.443777394 |
| PPP1R32   | 11q12.2       | -0.05076 | 0.322428 | 0.443777394 |
| MTX3      | 5q14.1        | 0.050759 | 0.322435 | 0.443777394 |
| C12ORF42  | 12q23.2-q23.3 | -0.05075 | 0.322501 | 0.443837781 |
| P2RY12    | 3q25.1        | 0.050739 | 0.322623 | 0.443975843 |
| NAV2      | 11p15.1       | -0.05073 | 0.322747 | 0.444115849 |
| VPS26B    | 11q25         | 0.050718 | 0.322826 | 0.444192853 |



|           |                 |          |          |             |
|-----------|-----------------|----------|----------|-------------|
| CAPN1     | 11q13.1         | 0.050712 | 0.322885 | 0.444232648 |
| INSYN2B   | 5q35.1          | -0.05071 | 0.322899 | 0.444232648 |
| SMG9      | 19q13.31        | -0.05071 | 0.322949 | 0.444271081 |
| ERC1      | 12p13.33        | 0.050696 | 0.323035 | 0.444359418 |
| ATP6AP1L  | 5q14.2          | -0.05069 | 0.323093 | 0.444408139 |
| BCAR4     | 16p13.13        | -0.05067 | 0.323265 | 0.444613989 |
| SLC32A1   | 20q11.23        | 0.050667 | 0.323317 | 0.444655192 |
| VCX3B     | Xp22.31         | -0.05066 | 0.32342  | 0.444766488 |
| RTF1      | 15q15.1         | -0.05065 | 0.323472 | 0.44480689  |
| IL36B     | 2q14.1          | 0.050642 | 0.323556 | 0.444891751 |
| PLEKHJ1   | 19p13.3         | -0.05064 | 0.323603 | 0.444927034 |
| ZBTB11    | 3q12.3          | 0.050632 | 0.323653 | 0.444964455 |
| CCNT1     | 12q13.11-q13.12 | 0.050628 | 0.323688 | 0.444982054 |
| HIST3H3   | 1q42.13         | 0.050587 | 0.324081 | 0.445491175 |
| SLTM      | 15q22.1         | 0.050566 | 0.324286 | 0.445742632 |
| SNORA29   | 6q25.3          | -0.05055 | 0.324413 | 0.445886966 |
| EP400     | 12q24.33        | 0.050544 | 0.324494 | 0.445957057 |
| RNF40     | 16p11.2         | -0.05054 | 0.324509 | 0.445957057 |
| GPR180    | 13q32.1         | -0.05053 | 0.324626 | 0.4460881   |
| SMARCA4   | 19p13.2         | -0.05052 | 0.324727 | 0.446189609 |
| CHL1      | 3p26.3          | 0.050518 | 0.324745 | 0.446189609 |
| ADAM21    | 14q24.2         | 0.050514 | 0.324779 | 0.446196551 |
| VWA3A     | 16p12.2         | -0.05051 | 0.324794 | 0.446196551 |
| PRKAB1    | 12q24.23        | 0.05051  | 0.324822 | 0.446204505 |
| OTOR      | 20p12.1         | 0.050502 | 0.324892 | 0.446269176 |
| C7        | 5p13.1          | -0.05049 | 0.325001 | 0.446366418 |
| TBX4      | 17q23.2         | -0.05049 | 0.325007 | 0.446366418 |
| HIST1H3C  | 6p22.2          | 0.050487 | 0.325045 | 0.446387597 |
| LINC02203 | 15q11.2         | 0.050483 | 0.325076 | 0.446400069 |
| KIFAP3    | 1q24.2          | -0.05047 | 0.325177 | 0.446508724 |
| GNG2      | 14q22.1         | 0.050452 | 0.325378 | 0.446753387 |
| PDE8B     | 5q13.3          | -0.05044 | 0.325481 | 0.446854139 |
| ADGRE3    | 19p13.12        | 0.05044  | 0.325496 | 0.446854139 |
| OR3A2     | 17p13.3         | 0.050408 | 0.325798 | 0.447238354 |
| UIMC1     | 5q35.2          | -0.05041 | 0.325823 | 0.447241194 |
| KIF2A     | 5q12.1          | 0.050398 | 0.325893 | 0.447307096 |
| WIPF1     | 2q31.1          | -0.05038 | 0.326085 | 0.447540595 |
| WDR34     | 9q34.11         | 0.050375 | 0.326114 | 0.447549698 |
| CFL1P1    | 10q23.31        | -0.05037 | 0.326209 | 0.447649554 |
| C11ORF16  | 11p15.4         | -0.05036 | 0.326245 | 0.447667744 |
| INSL5     | 1p31.3          | -0.05035 | 0.326325 | 0.447746907 |
| BTBD18    | 11q12.1         | -0.05034 | 0.326422 | 0.447842207 |
| C16ORF89  | 16p13.3         | 0.050341 | 0.326439 | 0.447842207 |
| AMBRA1    | 11p11.2         | -0.05033 | 0.326574 | 0.447996463 |
| RIPPLY1   | Xq22.3          | 0.050323 | 0.326615 | 0.448003408 |
| TMEM30CP  | 3q12.1          | -0.05032 | 0.326624 | 0.448003408 |
| RAVER1    | 19p13.2         | -0.05031 | 0.326771 | 0.448146399 |
| FRMD7     | Xq26.2          | -0.05031 | 0.326773 | 0.448146399 |
| HTR1A     | 5q12.3          | -0.0503  | 0.326798 | 0.448149736 |
| ARHGEF15  | 17p13.1         | -0.0503  | 0.326829 | 0.448161964 |
| TNP2      | 16p13.13        | 0.050285 | 0.326983 | 0.448339386 |
| CSTF2T    | 10q21.1         | 0.050283 | 0.327003 | 0.448339386 |
| EXOC2     | 6p25.3          | -0.05027 | 0.327088 | 0.448396389 |
| DBH       | 9q34.2          | 0.050274 | 0.32709  | 0.448396389 |
| IL4I1     | 19q13.33        | -0.05026 | 0.327188 | 0.448500359 |
| ANP32B    | 9q22.33         | 0.050235 | 0.327468 | 0.44885363  |
| HS3ST3A1  | 17p12           | -0.05022 | 0.327601 | 0.449000051 |
| TMEM151A  | 11q13.2         | -0.05022 | 0.327645 | 0.449000051 |

|            |          |          |          |             |
|------------|----------|----------|----------|-------------|
| FBXO31     | 16q24.2  | -0.05021 | 0.327661 | 0.449000051 |
| C6ORF118   | 6q27     | 0.050214 | 0.327664 | 0.449000051 |
| TOGARAM2   | 2p23.2   | 0.050211 | 0.327695 | 0.449011672 |
| FBXW12     | 3p21.31  | -0.0502  | 0.32781  | 0.449138522 |
| GALT       | 9p13.3   | -0.0502  | 0.32784  | 0.449147886 |
| DISP1      | 1q41     | 0.050187 | 0.327931 | 0.449242377 |
| ATG16L1    | 2q37.1   | -0.05017 | 0.328124 | 0.449472272 |
| JMJD1C-AS1 | 10q21.3  | -0.05016 | 0.328144 | 0.449472272 |
| ZBTB3      | 11q12.3  | -0.05016 | 0.328193 | 0.449508824 |
| OR5T2      | 11q12.1  | -0.05015 | 0.328311 | 0.449618125 |
| CCDC114    | 19q13.33 | -0.05015 | 0.328318 | 0.449618125 |
| PTK6       | 20q13.33 | 0.050114 | 0.328632 | 0.450017452 |
| FN3K       | 17q25.3  | 0.050106 | 0.328711 | 0.450094938 |
| PNPLA8     | 7q31.1   | -0.0501  | 0.328786 | 0.450166732 |
| PDIA3P1    | 1q21.1   | 0.050085 | 0.328915 | 0.450312622 |
| USP9X      | Xp11.4   | -0.05004 | 0.329325 | 0.450843435 |
| STAC2      | 17q12    | -0.05003 | 0.329406 | 0.450895622 |
| HIF1AN     | 10q24.31 | -0.05003 | 0.329429 | 0.450895622 |
| FAM221B    | 9p13.3   | -0.05003 | 0.329431 | 0.450895622 |
| DGAT2L6    | Xq13.1   | 0.050023 | 0.329511 | 0.45097518  |
| FAM181A    | 14q32.12 | 0.05002  | 0.329542 | 0.450986721 |
| LINC00663  | 19p13.11 | -0.04997 | 0.330067 | 0.451657605 |
| ZNF281     | 1q32.1   | -0.04996 | 0.330077 | 0.451657605 |
| CACFD1     | 9q34.2   | 0.049949 | 0.330228 | 0.451832304 |
| CCDC54     | 3q13.12  | -0.04994 | 0.330284 | 0.451878779 |
| FAIM2      | 12q13.12 | 0.049925 | 0.330459 | 0.452087548 |
| COL14A1    | 8q24.12  | -0.04992 | 0.330489 | 0.452096653 |
| SLC26A5    | 7q22.1   | 0.049919 | 0.330521 | 0.452110011 |
| HS6ST2     | Xq26.2   | -0.04991 | 0.330599 | 0.45218624  |
| MYO19      | 17q12    | 0.049899 | 0.330718 | 0.452300499 |
| FMR1-AS1   | Xq27.3   | -0.0499  | 0.330728 | 0.452300499 |
| USP26      | Xq26.2   | -0.04989 | 0.330776 | 0.45232555  |
| SPHAR      | 1q42.13  | 0.049891 | 0.330791 | 0.45232555  |
| FARSA      | 19p13.13 | -0.04989 | 0.330842 | 0.452363229 |
| PIGZ       | 3q29     | 0.049882 | 0.330877 | 0.452380911 |
| HNRNPM     | 19p13.2  | 0.049874 | 0.330954 | 0.452455733 |
| AEN        | 15q26.1  | 0.049866 | 0.331036 | 0.452516579 |
| KRTAP12-3  | 21q22.3  | -0.04986 | 0.331044 | 0.452516579 |
| LINC00473  | 6q27     | -0.04984 | 0.331249 | 0.452765159 |
| CPSF2      | 14q32.12 | 0.049829 | 0.331393 | 0.452932298 |
| LGALS12    | 11q12.3  | 0.049774 | 0.331931 | 0.453636564 |
| RPL9       | 4p14     | -0.04977 | 0.331954 | 0.453636938 |
| RAD23B     | 9q31.2   | 0.049766 | 0.332011 | 0.453683244 |
| ASB10      | 7q36.1   | -0.04973 | 0.33232  | 0.454074169 |
| UBE2Z      | 17q21.32 | 0.04972  | 0.332457 | 0.454231037 |
| ZNF826P    | 19p12    | -0.04972 | 0.332493 | 0.454248443 |
| PCDHB11    | 5q31.3   | -0.04971 | 0.332554 | 0.45430079  |
| CTNNA3     | 10q21.3  | 0.04967  | 0.332941 | 0.454799505 |
| LILRB4     | 19q13.42 | 0.049657 | 0.333063 | 0.454934972 |
| TENM1      | Xq25     | -0.0496  | 0.333601 | 0.455610502 |
| SEZ6L      | 22q12.1  | -0.0496  | 0.333623 | 0.455610502 |
| UBE2DNL    | Xq21.1   | 0.049598 | 0.333638 | 0.455610502 |
| LINC00032  | 9p21.2   | 0.049597 | 0.333649 | 0.455610502 |
| MUC20      | 3q29     | -0.04959 | 0.333767 | 0.455709324 |
| GPR65      | 14q31.3  | 0.049585 | 0.333767 | 0.455709324 |
| RNF34      | 12q24.31 | 0.049573 | 0.333884 | 0.455816461 |
| RPL34      | 4q25     | -0.04957 | 0.333891 | 0.455816461 |
| DLG1       | 3q29     | 0.049564 | 0.33397  | 0.455894424 |

|           |          |          |          |             |
|-----------|----------|----------|----------|-------------|
| CDH3      | 16q22.1  | -0.04956 | 0.334036 | 0.455941317 |
| PLXNC1    | 12q22    | 0.049556 | 0.33405  | 0.455941317 |
| LRFN5     | 14q21.1  | -0.04954 | 0.334196 | 0.456109367 |
| TRUB2     | 9q34.11  | -0.04953 | 0.334343 | 0.456278102 |
| RCC2      | 1p36.13  | -0.04952 | 0.334393 | 0.456315908 |
| ACTBL2    | 5q11.2   | 0.049517 | 0.334431 | 0.4563361   |
| LOC284379 | 19q13.42 | -0.04951 | 0.334541 | 0.456455344 |
| GOT1L1    | 8p11.23  | -0.04948 | 0.334832 | 0.456820728 |
| HOXB8     | 17q21.32 | 0.049462 | 0.33497  | 0.456974571 |
| ZC2HC1C   | 14q24.3  | 0.049459 | 0.334997 | 0.456974571 |
| ERCC2     | 19q13.32 | -0.04946 | 0.335037 | 0.456974571 |
| PLEKHH2   | 2p21     | -0.04945 | 0.335046 | 0.456974571 |
| MAT2A     | 2p11.2   | -0.04945 | 0.335058 | 0.456974571 |
| ALDOC     | 17q11.2  | -0.04944 | 0.335212 | 0.457136433 |
| NCBP1     | 9q22.33  | -0.04944 | 0.335223 | 0.457136433 |
| JPT1      | 17q25.1  | 0.049428 | 0.335301 | 0.457211626 |
| PPP6R2    | 22q13.33 | 0.049425 | 0.33533  | 0.457220727 |
| WDR91     | 7q33     | -0.0494  | 0.335619 | 0.457583372 |
| UBL3      | 13q12.3  | 0.049376 | 0.335811 | 0.457813882 |
| UBAP1     | 9p13.3   | -0.04937 | 0.335866 | 0.457857491 |
| FAM71A    | 1q32.3   | 0.049356 | 0.336005 | 0.458016323 |
| IL13RA1   | Xq24     | 0.049346 | 0.336108 | 0.458112023 |
| VCAM1     | 1p21.2   | -0.04934 | 0.336121 | 0.458112023 |
| DZIP1L    | 3q22.3   | -0.04934 | 0.33621  | 0.458179128 |
| MTFR1L    | 1p36.11  | -0.04933 | 0.336216 | 0.458179128 |
| ADGRF5    | 6p12.3   | -0.04933 | 0.336275 | 0.458228507 |
| DDX43     | 6q13     | -0.0493  | 0.336513 | 0.458521723 |
| FEM1B     | 15q23    | 0.049288 | 0.336677 | 0.458712938 |
| SPATA24   | 5q31.2   | -0.04926 | 0.336989 | 0.459107905 |
| SLC49A3   | 4p16.3   | 0.049249 | 0.337062 | 0.459176014 |
| REL       | 2p16.1   | 0.049229 | 0.337254 | 0.459405506 |
| ADAM29    | 4q34.1   | 0.04922  | 0.337343 | 0.459495969 |
| RSPH4A    | 6q22.1   | -0.04921 | 0.33741  | 0.459533678 |
| PIN1      | 19p13.2  | -0.04921 | 0.337417 | 0.459533678 |
| ALG13     | Xq23     | -0.0492  | 0.337588 | 0.459735875 |
| CLIP2     | 7q11.23  | 0.049191 | 0.337626 | 0.459756498 |
| DCAF12L1  | Xq25     | 0.049181 | 0.337725 | 0.459855849 |
| SAMM50    | 22q13.31 | 0.049179 | 0.337749 | 0.459855849 |
| LTB4R2    | 14q12    | -0.04918 | 0.337768 | 0.459855849 |
| UBE2MP1   | 16p11.2  | 0.049168 | 0.337857 | 0.459945665 |
| FAM72D    | 1q21.1   | 0.049156 | 0.337969 | 0.460064319 |
| C3ORF35   | 3p22.2   | -0.04915 | 0.338012 | 0.460064319 |
| LINC01777 | 1p36.32  | 0.049152 | 0.338013 | 0.460064319 |
| USP17L2   | 8p23.1   | 0.04913  | 0.338228 | 0.460325243 |
| SUMO3     | 21q22.3  | 0.049127 | 0.338264 | 0.460342949 |
| STRA8     | 7q33     | -0.04912 | 0.338298 | 0.46035865  |
| NTAN1     | 16p13.11 | 0.049118 | 0.338351 | 0.460398641 |
| CCSER2    | 10q23.1  | -0.04911 | 0.338387 | 0.460405304 |
| RPS29     | 14q21.3  | -0.04911 | 0.338401 | 0.460405304 |
| CEBPD     | 8q11.21  | 0.049059 | 0.33893  | 0.461062558 |
| TFPI2     | 7q21.3   | -0.04906 | 0.338931 | 0.461062558 |
| BCL7B     | 7q11.23  | -0.04905 | 0.33898  | 0.461099111 |
| MDM1      | 12q15    | -0.04905 | 0.339046 | 0.461157319 |
| NTRK3     | 15q25.3  | -0.04903 | 0.339177 | 0.461303666 |
| FBXL8     | 16q22.1  | 0.049008 | 0.339435 | 0.461623116 |
| APCS      | 1q23.2   | 0.048998 | 0.339527 | 0.461711333 |
| SCGB1D4   | 11q12.3  | -0.04899 | 0.339592 | 0.461711333 |
| CSH1      | 17q23.3  | -0.04899 | 0.339592 | 0.461711333 |

|             |          |          |          |             |
|-------------|----------|----------|----------|-------------|
| TSPY1       | Yp11.2   | -0.04899 | 0.339592 | 0.461711333 |
| BBX         | 3q13.12  | 0.048982 | 0.33969  | 0.461758209 |
| CSNK1G2-AS1 | 19p13.3  | 0.048982 | 0.339691 | 0.461758209 |
| SNAR-B2     | 19q13.33 | -0.04898 | 0.339696 | 0.461758209 |
| PCDHA2      | 5q31.3   | -0.04897 | 0.339764 | 0.461819692 |
| IL17F       | 6p12.2   | -0.04893 | 0.340189 | 0.462366542 |
| PPP3R2      | 9q31.1   | -0.04893 | 0.340231 | 0.462391929 |
| PI4KAP2     | 22q11.21 | -0.04892 | 0.340328 | 0.462491893 |
| ARID1B      | 6q25.3   | -0.04891 | 0.340423 | 0.462590625 |
| PCDHB2      | 5q31.3   | -0.04889 | 0.340589 | 0.462784809 |
| NUDT22      | 11q13.1  | 0.048887 | 0.340626 | 0.46280258  |
| RGS16       | 1q25.3   | -0.04888 | 0.340653 | 0.462808784 |
| PCLO        | 7q21.11  | -0.04887 | 0.340753 | 0.462913191 |
| APOBEC2     | 6p21.1   | -0.04887 | 0.340839 | 0.462980703 |
| MFSD13A     | 10q24.32 | 0.048865 | 0.340849 | 0.462980703 |
| OGFRL1      | 6q13     | 0.048857 | 0.340926 | 0.463043136 |
| ZNF653      | 19p13.2  | 0.048853 | 0.340966 | 0.463043136 |
| SRSF9       | 12q24.31 | 0.048853 | 0.340966 | 0.463043136 |
| TFEC        | 7q31.2   | 0.048851 | 0.340988 | 0.463043136 |
| SBF2        | 11p15.4  | -0.04885 | 0.341015 | 0.463043985 |
| CPT1B       | 22q13.33 | -0.04885 | 0.341035 | 0.463043985 |
| H3F3B       | 17q25.1  | -0.04883 | 0.341179 | 0.463209305 |
| RCOR2       | 11q13.1  | 0.048823 | 0.341258 | 0.463284954 |
| LIPF        | 10q23.31 | 0.048812 | 0.341366 | 0.463372607 |
| YBX3        | 12p13.2  | -0.04881 | 0.341369 | 0.463372607 |
| DOCK11      | Xq24     | -0.04881 | 0.341403 | 0.463387499 |
| ZNF112      | 19q13.31 | -0.0488  | 0.341465 | 0.46344001  |
| VWC2        | 7p12.2   | -0.04879 | 0.341543 | 0.463514617 |
| COQ5        | 12q24.31 | 0.04879  | 0.341591 | 0.463547933 |
| SH3BP5L     | 1q44     | 0.048771 | 0.341776 | 0.463768334 |
| PLA2G4D     | 15q15.1  | 0.048769 | 0.341801 | 0.46376964  |
| SRR         | 17p13.3  | 0.048765 | 0.341832 | 0.463780757 |
| ITIH2       | 10p14    | -0.04876 | 0.341925 | 0.463876104 |
| NEK11       | 3q22.1   | 0.048752 | 0.341966 | 0.463900295 |
| MAATS1      | 3q13.33  | -0.04875 | 0.342014 | 0.46393406  |
| LCE1D       | 1q21.3   | 0.048729 | 0.34219  | 0.464125356 |
| ZDHHC13     | 11p15.1  | 0.048726 | 0.342227 | 0.464125356 |
| GGTLC1      | 20p11.21 | -0.04872 | 0.342244 | 0.464125356 |
| PCSK4       | 19p13.3  | -0.04872 | 0.342248 | 0.464125356 |
| ELMOD1      | 11q22.3  | -0.04871 | 0.342363 | 0.46424917  |
| C7ORF69     | 7p12.3   | 0.048704 | 0.342439 | 0.464321449 |
| BCL11B      | 14q32.2  | -0.0487  | 0.342504 | 0.46437858  |
| MRPS34      | 16p13.3  | -0.04869 | 0.342564 | 0.464428243 |
| ZNF616      | 19q13.41 | 0.048671 | 0.342769 | 0.464674909 |
| HIST2H2BA   | 1p11.2   | -0.04863 | 0.343194 | 0.465218822 |
| PEAK3       | 19p13.3  | 0.048624 | 0.343233 | 0.465240838 |
| ERCC6L      | Xq13.1   | -0.04861 | 0.343328 | 0.465337041 |
| PTRHD1      | 2p23.3   | 0.048592 | 0.34355  | 0.465584374 |
| RBM18       | 9q33.2   | -0.04859 | 0.343556 | 0.465584374 |
| ADARB2      | 10p15.3  | -0.04859 | 0.343601 | 0.465613011 |
| ACP6        | 1q21.2   | 0.048566 | 0.343807 | 0.465860788 |
| CYP4X1      | 1p33 1   | 0.048561 | 0.343863 | 0.465904713 |
| NEU4        | 2q37.3   | 0.048558 | 0.343895 | 0.465916719 |
| KRTAP4-3    | 17q21.2  | -0.04855 | 0.343978 | 0.465997669 |
| SPATA31C1   | 9q22.1   | 0.048539 | 0.34408  | 0.466105101 |
| EFCC1       | 3q21.3   | 0.048532 | 0.344154 | 0.466173305 |
| OPRL1       | 20q13.33 | -0.04851 | 0.344337 | 0.466389899 |
| CYP1A2      | 15q24.1  | 0.048498 | 0.344449 | 0.466565016 |

|           |                  |          |          |             |
|-----------|------------------|----------|----------|-------------|
| URB2      | 1q42.13          | -0.04849 | 0.344568 | 0.466639025 |
| PLAAT1    | 3q29             | 0.048475 | 0.344717 | 0.466805357 |
| FTSJ3     | 17q23.3          | -0.04847 | 0.344737 | 0.466805357 |
| ARHGEF1   | 19q13.2          | -0.04847 | 0.344808 | 0.466864232 |
| MTFP1     | 22q12.2          | 0.048464 | 0.344827 | 0.466864232 |
| POLE3     | 9q32             | -0.04844 | 0.345053 | 0.467137716 |
| MTSS1     | 8q24.13          | 0.048431 | 0.345158 | 0.467248528 |
| ARTN      | 1p34.1           | -0.04842 | 0.345252 | 0.467344784 |
| DRP2      | Xq22.1           | -0.0484  | 0.345456 | 0.467581067 |
| KIF21A    | 12q12            | 0.048397 | 0.345495 | 0.467581067 |
| CABP1     | 12q24.31         | 0.048397 | 0.345497 | 0.467581067 |
| TSHB      | 1p13.2           | 0.048392 | 0.345548 | 0.467618644 |
| EDIL3     | 5q14.3           | -0.04838 | 0.345714 | 0.467786085 |
| LINC00950 | 9p13.3           | 0.048375 | 0.345718 | 0.467786085 |
| TRAPPC2L  | 16q24.3          | -0.04837 | 0.345763 | 0.467815508 |
| MYF6      | 12q21.31         | -0.04837 | 0.345807 | 0.467843312 |
| HAX1      | 1q21.3           | -0.04834 | 0.34603  | 0.468112951 |
| CXCL2     | 4q13.3           | -0.04834 | 0.346114 | 0.468194779 |
| NUDC      | 1p36.11          | -0.04833 | 0.346204 | 0.468285341 |
| CBWD3     | 9q21.11          | -0.04832 | 0.34628  | 0.468355543 |
| STKLD1    | 9q34.2           | -0.0483  | 0.34648  | 0.46859541  |
| GHRHR     | 7p14.3           | -0.04829 | 0.346542 | 0.468647606 |
| DHX38     | 16q22.2          | -0.04827 | 0.346716 | 0.468851433 |
| B3GNT9    | 16q22.1          | 0.048268 | 0.346781 | 0.468907117 |
| RAPGEF6   | 5q31.1           | 0.048262 | 0.346848 | 0.468945701 |
| MYH9      | 22q12.3          | 0.048261 | 0.346856 | 0.468945701 |
| SPINT2    | 19q13.2          | 0.048251 | 0.346949 | 0.469039242 |
| TRPT1     | 11q13.1          | -0.04824 | 0.347065 | 0.469164824 |
| C22ORF31  | 22q12.1          | -0.04823 | 0.347203 | 0.4692937   |
| DCTPP1    | 16p11.2          | -0.04823 | 0.347208 | 0.4692937   |
| C22ORF34  | 22q13.33         | -0.04822 | 0.347295 | 0.469380683 |
| FERD3L    | 7p21.1           | -0.0482  | 0.347491 | 0.469613381 |
| C17ORF99  | 17q25.3          | -0.04819 | 0.347545 | 0.469654172 |
| TTBK2     | 15q15.2          | -0.04819 | 0.347598 | 0.469694263 |
| CACNB3    | 12q13.12         | 0.048182 | 0.347649 | 0.469732505 |
| OLFM4     | 13q14.3          | 0.048172 | 0.347746 | 0.469801673 |
| P2RY2     | 11q13.4          | 0.048172 | 0.347748 | 0.469801673 |
| GABRR2    | 6q15             | 0.048167 | 0.347791 | 0.469828501 |
| LYPD6     | 2q23.2           | 0.048157 | 0.347891 | 0.469932116 |
| ALDH5A1   | 6p22.3           | 0.048147 | 0.347999 | 0.470046148 |
| COX6A1    | 12q24.31 12q24.2 | 0.048136 | 0.348105 | 0.470157277 |
| ANO4      | 12q23.1          | -0.04811 | 0.348321 | 0.470400063 |
| DPF1      | 19q13.2          | -0.04811 | 0.348331 | 0.470400063 |
| PRSS48    | 4q31.3           | 0.04811  | 0.348364 | 0.47040617  |
| HS6ST3    | 13q32.1          | 0.048108 | 0.348383 | 0.47040617  |
| DNAJC18   | 5q31.2           | -0.0481  | 0.348433 | 0.470430578 |
| SLC35E2B  | 1p36.33          | -0.0481  | 0.348448 | 0.470430578 |
| IFNA7     | 9p21.3           | 0.048085 | 0.34862  | 0.470631746 |
| CNOT9     | 2q35             | -0.04808 | 0.348662 | 0.470655842 |
| SPAG11A   | 8p23.1           | -0.04806 | 0.348873 | 0.470909294 |
| CFAP410   | 21q22.3          | 0.048047 | 0.348999 | 0.471018635 |
| ZNF704    | 8q21.13          | -0.04805 | 0.349001 | 0.471018635 |
| TMBIM4    | 12q14.3          | 0.04803  | 0.34917  | 0.471214499 |
| TECRL     | 4q13.1           | 0.048027 | 0.349198 | 0.471221268 |
| FOXM1     | 12p13.33         | 0.048016 | 0.349306 | 0.471334861 |
| UGT1A5    | 2q37.1           | 0.048011 | 0.349364 | 0.471381705 |
| C10ORF91  | 10q26.3          | 0.048007 | 0.349402 | 0.471400698 |
| THEM5     | 1q21.3           | 0.047998 | 0.349492 | 0.471490378 |

|           |          |          |          |             |
|-----------|----------|----------|----------|-------------|
| SNORA56   | Xq28     | -0.04799 | 0.349609 | 0.471615933 |
| TBR1      | 2q24.2   | 0.047983 | 0.349639 | 0.4716257   |
| DET1      | 15q26.1  | -0.04796 | 0.349862 | 0.471868268 |
| HIST1H2AH | 6p22.1   | -0.04796 | 0.349866 | 0.471868268 |
| QRFP      | 9q34.12  | -0.04795 | 0.349959 | 0.471961091 |
| RPN1      | 3q21.3   | 0.047948 | 0.349999 | 0.471983248 |
| VAR5      | 6p21.33  | 0.047941 | 0.350059 | 0.472033247 |
| RLN3      | 19p13.12 | -0.04794 | 0.350107 | 0.472065982 |
| PA2G4     | 12q13.2  | -0.04791 | 0.350341 | 0.472349437 |
| AAGAB     | 15q23    | 0.047899 | 0.350491 | 0.472519262 |
| KRT26     | 17q21.2  | 0.047882 | 0.350657 | 0.472712154 |
| TMSB4Y    | Yq11.221 | 0.047859 | 0.350887 | 0.472990666 |
| STRN4     | 19q13.32 | -0.04783 | 0.35115  | 0.47331003  |
| DERL1     | 8q24.13  | -0.04783 | 0.351172 | 0.47331003  |
| TRIM2     | 4q31.3   | 0.04781  | 0.35138  | 0.473559037 |
| ECSIT     | 19p13.2  | 0.047793 | 0.351554 | 0.47376125  |
| DNPH1     | 6p21.1   | 0.047771 | 0.351775 | 0.474027988 |
| RPL21P44  | 4q12     | -0.04776 | 0.35186  | 0.474109734 |
| C11ORF45  | 11q24.3  | -0.04775 | 0.351951 | 0.474201366 |
| MTMR4     | 17q22    | 0.047751 | 0.351984 | 0.47421339  |
| LTBP2     | 14q24.3  | -0.04771 | 0.352436 | 0.474790792 |
| EPPK1     | 8q24.3   | 0.047698 | 0.352517 | 0.47485     |
| GGPS1     | 1q42.3   | -0.0477  | 0.352528 | 0.47485     |
| LECT2     | 5q31.1   | -0.04769 | 0.352625 | 0.474948643 |
| KRTCAP2   | 1q22     | -0.04768 | 0.352715 | 0.475034039 |
| ZNF239    | 10q11.21 | -0.04768 | 0.352735 | 0.475034039 |
| TMC3      | 15q25.1  | -0.04766 | 0.352889 | 0.47520916  |
| TCEAL6    | Xq22.1   | -0.04764 | 0.353151 | 0.475508462 |
| PDP2      | 16q22.1  | 0.047634 | 0.353159 | 0.475508462 |
| RSPO3     | 6q22.33  | -0.04762 | 0.3533   | 0.475666994 |
| FLJ42393  | 3q27.3   | 0.047599 | 0.35352  | 0.475930274 |
| HCG27     | 6p21.33  | 0.047594 | 0.353564 | 0.475958148 |
| ATG7      | 3p25.3   | 0.047586 | 0.353647 | 0.476011534 |
| PARD6G    | 18q23    | -0.04759 | 0.353651 | 0.476011534 |
| FOSL1     | 11q13.1  | -0.04758 | 0.353743 | 0.476102787 |
| TMPRSS11A | 4q13.2   | -0.04757 | 0.353818 | 0.476171884 |
| LY6G6C    | 6p21.33  | 0.047563 | 0.353876 | 0.476217637 |
| TEX13A    | Xq22.3   | -0.04755 | 0.354012 | 0.47636896  |
| C1QTNF1   | 17q25.3  | -0.04754 | 0.354072 | 0.476388345 |
| FAM181B   | 11q14.1  | -0.04754 | 0.354074 | 0.476388345 |
| RNF185    | 22q12.2  | -0.04754 | 0.35414  | 0.476421759 |
| ADAMTS4   | 1q23.3   | -0.04754 | 0.354146 | 0.476421759 |
| LIN9      | 1q42.12  | 0.047533 | 0.354181 | 0.476436722 |
| CCNJL     | 5q33.3   | 0.047529 | 0.354225 | 0.476463427 |
| VCPKMT    | 14q21.3  | -0.04752 | 0.354356 | 0.476607557 |
| AGMAT     | 1p36.21  | -0.04751 | 0.354404 | 0.476640137 |
| CA6       | 1p36.23  | -0.04749 | 0.35462  | 0.476898756 |
| CCDC144CP | 17p11.2  | 0.047479 | 0.354728 | 0.477012051 |
| ZBTB45    | 19q13.43 | -0.04748 | 0.354764 | 0.477028608 |
| OR52D1    | 11p15.4  | 0.047458 | 0.354943 | 0.477237373 |
| GAB4      | 22q11.1  | 0.047453 | 0.354994 | 0.477258571 |
| KMT2A     | 11q23.3  | -0.04745 | 0.355007 | 0.477258571 |
| CD47      | 3q13.12  | -0.04741 | 0.355398 | 0.477752555 |
| EIF2A     | 3q25.1   | -0.0474  | 0.355494 | 0.477849837 |
| TMEM97    | 17q11.2  | -0.04739 | 0.355586 | 0.477941247 |
| C3ORF36   | 3q22.1   | 0.047385 | 0.355682 | 0.478038337 |
| VSTM2A    | 7p11.2   | 0.047378 | 0.355759 | 0.478109625 |
| RAB5C     | 17q21.2  | -0.04738 | 0.355787 | 0.478115533 |

|               |                   |          |          |             |
|---------------|-------------------|----------|----------|-------------|
| MLNR          | 13q14.2           | 0.047351 | 0.356033 | 0.478412887 |
| ACAP3         | 1p36.33           | -0.04735 | 0.356076 | 0.478439598 |
| BMP15         | Xp11.22           | -0.04734 | 0.356194 | 0.478563682 |
| ACP2          | 11p11.2 11p12-p11 | 0.047333 | 0.356217 | 0.478563682 |
| PCDHGB8P      | 5q31.3            | 0.04733  | 0.356241 | 0.478565    |
| ZBTB1         | 14q23.3           | 0.047314 | 0.356411 | 0.478761344 |
| LMF1          | 16p13.3           | -0.04727 | 0.356863 | 0.479306441 |
| LRP5          | 11q13.2           | -0.04727 | 0.356865 | 0.479306441 |
| CATSPERD      | 19p13.3           | -0.04726 | 0.357007 | 0.47946537  |
| KRTAP7-1      | 21q22.11          | 0.047248 | 0.357077 | 0.479526826 |
| SPATA1        | 1p22.3            | 0.047216 | 0.357406 | 0.479936277 |
| SPAG7         | 17p13.2           | 0.047193 | 0.357646 | 0.480226653 |
| SPSB1         | 1p36.22           | -0.04717 | 0.357835 | 0.480448008 |
| UTP25         | 1q32.2            | -0.04717 | 0.357897 | 0.480498363 |
| HIST1H2AA     | 6p22.2            | -0.04716 | 0.358024 | 0.480605175 |
| LINC00293     | 8q11.1            | -0.04716 | 0.358024 | 0.480605175 |
| ADAMTSL1      | 9p22.2-p22.1      | -0.04715 | 0.358088 | 0.480638102 |
| LGALS13       | 19q13.2           | -0.04715 | 0.358114 | 0.480638102 |
| MAPK12        | 22q13.33          | -0.04715 | 0.358121 | 0.480638102 |
| ERICH6        | 3q25.1            | -0.04714 | 0.358173 | 0.480676706 |
| TLN1          | 9p13.3            | 0.047132 | 0.358259 | 0.480759477 |
| SMCO1         | 3q29              | -0.04712 | 0.358365 | 0.480840344 |
| CST9L         | 20p11.21          | -0.04712 | 0.358367 | 0.480840344 |
| LARP4         | 12q13.12          | 0.047112 | 0.35847  | 0.480943724 |
| KRT5          | 12q13.13          | -0.04711 | 0.358492 | 0.480943724 |
| MCM10         | 10p13             | 0.047095 | 0.358646 | 0.481117549 |
| HINT2         | 9p13.3            | 0.047076 | 0.358837 | 0.48134203  |
| MKNK1         | 1p33              | 0.047053 | 0.359068 | 0.481619704 |
| ZIC1          | 3q24              | -0.04705 | 0.359141 | 0.481684612 |
| NR2C2         | 3p25.1            | -0.04704 | 0.359238 | 0.481782518 |
| OSGEP         | 14q11.2           | 0.047034 | 0.359269 | 0.481791592 |
| FBXW9         | 19p13.13          | 0.047024 | 0.35937  | 0.48186289  |
| MARCKS        | 6q21              | -0.04702 | 0.35937  | 0.48186289  |
| NDUFB10       | 16p13.3           | -0.04701 | 0.359469 | 0.481963504 |
| HACD3         | 15q22.31          | 0.047009 | 0.35952  | 0.481999158 |
| LYPD3         | 19q13.31          | -0.04699 | 0.359759 | 0.482287312 |
| CSRP3         | 11p15.1           | 0.046966 | 0.359964 | 0.482530407 |
| DKFZP586I1420 | 7p14.3            | -0.04696 | 0.360022 | 0.482575837 |
| CDH1          | 16q22.1           | -0.04694 | 0.360205 | 0.482788833 |
| ERRF1         | 1p36.23           | 0.046938 | 0.360247 | 0.482812683 |
| NOTO          | 2p13.2            | -0.04693 | 0.360287 | 0.482834001 |
| ZNF324        | 19q13.43          | 0.046925 | 0.360384 | 0.482931329 |
| TBX22         | Xq21.1            | -0.04692 | 0.360413 | 0.482937347 |
| SCARNA10      | 12p13.31          | -0.04692 | 0.360446 | 0.482949531 |
| FASTK         | 7q36.1            | -0.04691 | 0.360549 | 0.483032153 |
| PRDM9         | 5p14.2            | -0.04691 | 0.360556 | 0.483032153 |
| FKRP          | 19q13.32          | -0.04689 | 0.360752 | 0.483263479 |
| TAX1BP3       | 17p13.2           | 0.046879 | 0.360854 | 0.483367182 |
| B3GNT8        | 19q13.2           | -0.04688 | 0.360889 | 0.48338217  |
| SNORA51       | 20p13             | -0.04687 | 0.360927 | 0.483399721 |
| SLC25A13      | 7q21.3            | -0.04687 | 0.36098  | 0.48343873  |
| OR6C1         | 12q13.2           | 0.046844 | 0.36121  | 0.483714086 |
| PRR32         | Xq25              | -0.04684 | 0.361285 | 0.483782853 |
| SETD1B        | 12q24.31          | 0.046812 | 0.361541 | 0.484093192 |
| MCM2          | 3q21.3            | -0.04681 | 0.361592 | 0.484128899 |
| JAK3          | 19p13.11          | -0.0468  | 0.36164  | 0.484161648 |
| C2ORF48       | 2p25.1            | -0.0468  | 0.361667 | 0.484164662 |
| GLT8D1        | 3p21.1            | -0.0468  | 0.361691 | 0.484164994 |

|               |               |          |          |             |
|---------------|---------------|----------|----------|-------------|
| MED21         | 12p11.23      | -0.04679 | 0.361733 | 0.484188866 |
| IQCC          | 1p35.2        | 0.046774 | 0.361926 | 0.484414024 |
| ATF2          | 2q31.1        | -0.04677 | 0.361988 | 0.484462788 |
| CNKS2R2       | Xp22.12       | 0.046766 | 0.362011 | 0.484462788 |
| GRIA1         | 5q33.2        | -0.04676 | 0.362057 | 0.484492544 |
| RUNDC3B       | 7q21.12       | 0.046749 | 0.362189 | 0.48462815  |
| DENND4B       | 1q21.3        | -0.04675 | 0.362207 | 0.48462815  |
| HPN           | 19q13.11      | -0.04674 | 0.362269 | 0.484678838 |
| TAS2R10       | 12p13.2       | -0.04674 | 0.362302 | 0.484691221 |
| KCNJ1         | 11q24.3       | 0.046732 | 0.362364 | 0.484741385 |
| RTP2          | 3q27.3        | 0.046727 | 0.36241  | 0.484770054 |
| SRXN1         | 20p13         | -0.04672 | 0.362439 | 0.484777169 |
| DCDC1         | 11p13         | 0.04672  | 0.362484 | 0.484804475 |
| ZNF366        | 5q13.2 5q13.2 | 0.046716 | 0.362528 | 0.484830861 |
| CERKL         | 2q31.3        | -0.04671 | 0.362554 | 0.48483402  |
| STK11IP       | 2q35          | -0.0467  | 0.362647 | 0.484902523 |
| DOHH          | 19p13.3       | -0.0467  | 0.362654 | 0.484902523 |
| OR6C68        | 12q13.2       | -0.0467  | 0.362727 | 0.484968042 |
| OR2T1         | 1q44          | -0.04669 | 0.362785 | 0.485012991 |
| OR2W1         | 6p22.1        | 0.046664 | 0.36306  | 0.485348856 |
| ANKRD34A      | 1q21.1        | 0.046652 | 0.363182 | 0.485479335 |
| WBP2NL        | 22q13.2       | -0.04664 | 0.363259 | 0.485524853 |
| PGLYRP3       | 1q21.3        | 0.046644 | 0.363265 | 0.485524853 |
| SMIM3         | 5q33.1        | 0.046641 | 0.363299 | 0.485537792 |
| ZNF276        | 16q24.3       | -0.04662 | 0.363467 | 0.485730606 |
| SEPTIN7P9     | 10p11.1       | -0.04662 | 0.363559 | 0.485802116 |
| JMJD7-PLA2G4B | 15q15.1       | -0.04661 | 0.363569 | 0.485802116 |
| TUBG1         | 17q21.2       | 0.046604 | 0.363685 | 0.485923833 |
| HSPA7         | 1q23.3        | -0.0466  | 0.36374  | 0.485965521 |
| PPP1R15A      | 19q13.33      | -0.04659 | 0.36378  | 0.485978539 |
| ZNF536        | 19q12         | 0.046593 | 0.363798 | 0.485978539 |
| FAM200B       | 4p15.32       | -0.04659 | 0.36384  | 0.486001663 |
| ADAMTS2       | 5q35.3        | -0.04658 | 0.363962 | 0.48611231  |
| RRAD          | 16q22.1       | -0.04657 | 0.363986 | 0.48611231  |
| KIAA2013      | 1p36.22       | 0.046573 | 0.363998 | 0.48611231  |
| TRRAP         | 7q22.1        | -0.04657 | 0.36404  | 0.48611231  |
| TBC1D10B      | 16p11.2       | -0.04657 | 0.364044 | 0.48611231  |
| FAM99A        | 11p15.5       | -0.04656 | 0.364126 | 0.486189571 |
| ST8SIA3       | 18q21.31      | -0.04656 | 0.364169 | 0.486213958 |
| INSIG2        | 2q14.1-q14.2  | -0.04654 | 0.364339 | 0.486315544 |
| TBC1D17       | 19q13.33      | -0.04654 | 0.364351 | 0.486315544 |
| ACOT2         | 14q24.3       | -0.04654 | 0.364355 | 0.486315544 |
| DNTTIP2       | 1p22.1        | -0.04654 | 0.364364 | 0.486315544 |
| CA5BP1        | Xp22.2        | -0.04654 | 0.364371 | 0.486315544 |
| OR2M4         | 1q44          | -0.04654 | 0.364391 | 0.486315544 |
| PHYH          | 10p13         | -0.04653 | 0.364459 | 0.486374969 |
| PPIAL4E       | 1q21.1        | -0.04653 | 0.364485 | 0.48637609  |
| SFTPA1        | 10q22.3       | 0.046521 | 0.36454  | 0.48641814  |
| ZNF626        | 19p12         | -0.04652 | 0.364597 | 0.486461552 |
| MFAP3L        | 4q33          | -0.04651 | 0.364633 | 0.486474025 |
| SRP14P1       | 12p13.31      | -0.04651 | 0.364658 | 0.486474025 |
| LEFTY1        | 1q42.12       | -0.04651 | 0.364679 | 0.486474025 |
| SPRR1A        | 1q21.3        | 0.046504 | 0.364715 | 0.486488832 |
| SHISAL2A      | 1p32.3        | 0.046489 | 0.364865 | 0.486656631 |
| ANKS1B        | 12q23.1       | -0.04648 | 0.36492  | 0.486695697 |
| SLITRK3       | 3q26.1        | -0.04648 | 0.364943 | 0.486695697 |
| PDE6A         | 5q32          | -0.04647 | 0.36509  | 0.486836996 |
| AMMECR1       | Xq23          | -0.04647 | 0.365097 | 0.486836996 |



|           |          |          |          |             |
|-----------|----------|----------|----------|-------------|
| HERC2     | 15q13.1  | -0.04645 | 0.365249 | 0.487006249 |
| HOXD4     | 2q31.1   | 0.046433 | 0.365442 | 0.487231974 |
| MTMR9LP   | 1p35.2   | -0.04643 | 0.365516 | 0.487297371 |
| DDT       | 22q11.23 | -0.04642 | 0.365553 | 0.487315372 |
| SLC2A4    | 17p13.1  | -0.04641 | 0.3657   | 0.487455221 |
| SLC35E4   | 22q12.2  | -0.0464  | 0.365736 | 0.487455221 |
| PSKH2     | 8q21.3   | -0.0464  | 0.365769 | 0.487455221 |
| TMEM115   | 3p21.31  | -0.0464  | 0.365772 | 0.487455221 |
| PCDHA4    | 5q31.3   | -0.0464  | 0.36578  | 0.487455221 |
| LOC728989 | 1q21.1   | 0.046388 | 0.365913 | 0.487599537 |
| NFIA      | 1p31.3   | 0.04636  | 0.366195 | 0.487942978 |
| PROK2     | 3p13     | -0.04635 | 0.366319 | 0.488076068 |
| YBX2      | 17p13.1  | 0.046343 | 0.366373 | 0.48811557  |
| ATP2A1    | 16p11.2  | 0.046334 | 0.366471 | 0.488213686 |
| TEX264    | 3p21.2   | -0.04632 | 0.36658  | 0.488326798 |
| AGTRAP    | 1p36.22  | 0.046317 | 0.366643 | 0.488377478 |
| MYO18B    | 22q12.1  | -0.04631 | 0.3667   | 0.488389738 |
| WNT5A     | 3p14.3   | -0.04631 | 0.366701 | 0.488389738 |
| C12ORF77  | 12p12.1  | 0.046305 | 0.366769 | 0.488422792 |
| RCCD1     | 15q26.1  | -0.0463  | 0.366774 | 0.488422792 |
| MANEAL    | 1p34.3   | 0.046293 | 0.366893 | 0.488547732 |
| ZNF221    | 19q13.31 | -0.04629 | 0.36692  | 0.488551176 |
| COG6      | 13q14.11 | -0.04627 | 0.367129 | 0.488797657 |
| LRR8E     | 19p13.2  | 0.046263 | 0.367209 | 0.488872127 |
| MIF4GD    | 17q25.1  | -0.04625 | 0.367328 | 0.48899712  |
| MOB3C     | 1p33     | 0.046245 | 0.36739  | 0.489047827 |
| AVPR2     | Xq28     | -0.04624 | 0.367463 | 0.489111875 |
| GJB6      | 13q12.11 | 0.046232 | 0.367526 | 0.489163591 |
| KLHDC4    | 16q24.2  | -0.04622 | 0.367696 | 0.489357504 |
| DPPA2     | 3q13.13  | -0.04621 | 0.367792 | 0.48943709  |
| OR51M1    | 11p15.4  | -0.04621 | 0.367805 | 0.48943709  |
| JPH1      | 8q21.11  | 0.0462   | 0.367862 | 0.489479942 |
| TRIM61    | 4q32.3   | -0.04619 | 0.367984 | 0.489610891 |
| MUSTN1    | 3p21.1   | -0.04618 | 0.368077 | 0.489701756 |
| PTS       | 11q23.1  | -0.04615 | 0.368329 | 0.490003893 |
| RPL17     | 18q21.1  | 0.046148 | 0.3684   | 0.49006654  |
| PHOX2B    | 4p13     | -0.04614 | 0.368493 | 0.490158012 |
| TAFA4     | 3p14.1   | -0.0461  | 0.368892 | 0.490656028 |
| OR51T1    | 11p15.4  | 0.046096 | 0.368934 | 0.490679162 |
| ILDR1     | 3q13.33  | 0.046072 | 0.369186 | 0.490981003 |
| SP9       | 2q31.1   | -0.04606 | 0.369337 | 0.49114908  |
| TTC23L    | 5p13.2   | -0.04605 | 0.369381 | 0.491169106 |
| THG1L     | 5q33.3   | 0.046052 | 0.369401 | 0.491169106 |
| DDI1      | 11q22.3  | -0.04604 | 0.3695   | 0.491260018 |
| CLEC12B   | 12p13.2  | 0.04604  | 0.369518 | 0.491260018 |
| GFM1      | 3q25.32  | 0.046035 | 0.369576 | 0.491303616 |
| IFT20     | 17q11.2  | -0.046   | 0.369972 | 0.49179841  |
| DNAJC4    | 11q13.1  | -0.04599 | 0.370055 | 0.491876055 |
| TRIP12    | 2q36.3   | 0.045982 | 0.370129 | 0.491915061 |
| ACOT4     | 14q24.3  | 0.045981 | 0.370134 | 0.491915061 |
| LNP1      | 3q12.2   | 0.04597  | 0.370255 | 0.492043427 |
| KLHDC2    | 14q21.3  | -0.04595 | 0.370425 | 0.492237374 |
| AMDHD1    | 12q23.1  | -0.04593 | 0.370626 | 0.492443899 |
| DMRTA2    | 1p32.3   | 0.045934 | 0.37063  | 0.492443899 |
| OR2A14    | 7q35     | 0.04593  | 0.370671 | 0.49246556  |
| SRY       | Yp11.2   | -0.04591 | 0.370827 | 0.49264053  |
| DHRS7     | 14q23.1  | 0.045909 | 0.370883 | 0.492682469 |
| C12ORF66  | 12q14.2  | -0.0459  | 0.370948 | 0.492736304 |

|            |               |          |          |             |
|------------|---------------|----------|----------|-------------|
| OR13F1     | 9q31.1        | 0.045899 | 0.370991 | 0.492760154 |
| KCNU1      | 8p11.23       | 0.045859 | 0.371404 | 0.49327533  |
| PAIP2B     | 2p13.3        | 0.04585  | 0.371506 | 0.493378349 |
| TNFRSF18   | 1p36.33       | 0.045845 | 0.371553 | 0.493408328 |
| ZNF770     | 15q14         | 0.045839 | 0.371616 | 0.493459208 |
| PTPRK      | 6q22.33       | -0.04583 | 0.371728 | 0.49357578  |
| KIF3A      | 5q31.1        | -0.04581 | 0.371947 | 0.493802706 |
| PPP4R3C    | Xp21.3        | -0.04581 | 0.371949 | 0.493802706 |
| KIAA0825   | 5q15          | 0.045804 | 0.371986 | 0.493819466 |
| RPE65      | 1p31.3        | 0.045796 | 0.372071 | 0.493900224 |
| RPL13AP20  | 12p13.1       | -0.04579 | 0.372129 | 0.49394373  |
| ATP5MPL    | 14q32.33      | 0.045782 | 0.37221  | 0.494018529 |
| PLAAT3     | 11q12.3-q13.1 | -0.04577 | 0.372327 | 0.494115233 |
| CENPI      | Xq22.1        | 0.045768 | 0.372363 | 0.494115233 |
| TRAPPC4    | 11q23.3       | -0.04577 | 0.37237  | 0.494115233 |
| HPDL       | 1p34.1        | -0.04576 | 0.372419 | 0.494115233 |
| KRTAP21-1  | 21q22.11      | -0.04576 | 0.372424 | 0.494115233 |
| CYP2B7P    | 19q13.2       | -0.04576 | 0.372451 | 0.494115233 |
| COX7A2     | 6q14.1        | 0.045758 | 0.372464 | 0.494115233 |
| CHRNA2     | 8p21.2        | 0.045756 | 0.37248  | 0.494115233 |
| PTBP1      | 19p13.3       | -0.04575 | 0.372505 | 0.494115233 |
| AMZ1       | 7p22.3        | -0.04574 | 0.3726   | 0.494208811 |
| FMO9P      | 1q24.1        | 0.045736 | 0.372691 | 0.494297112 |
| RPSA       | 3p22.1        | -0.04572 | 0.372829 | 0.494447218 |
| TPTEP2     | 22q13.1       | -0.04572 | 0.37287  | 0.494468258 |
| AQP12B     | 2q37.3        | -0.04569 | 0.373152 | 0.494809417 |
| LINC01565  | 3q21.3        | -0.04569 | 0.373222 | 0.494869798 |
| EEF2K      | 16p12.2       | -0.04567 | 0.373402 | 0.495053649 |
| PIK3CD-AS1 | 1p36.22       | 0.045668 | 0.37341  | 0.495053649 |
| ARID3B     | 15q24.1       | -0.04566 | 0.373499 | 0.495138395 |
| G6PC       | 17q21.31      | -0.04565 | 0.373623 | 0.495270498 |
| RNF169     | 11q13.4       | 0.045637 | 0.373735 | 0.495386828 |
| RYR2       | 1q43          | -0.04562 | 0.373939 | 0.495623244 |
| RELB       | 19q13.32      | 0.045608 | 0.374031 | 0.495713104 |
| SNORA14A   | 7q11.23       | 0.045596 | 0.374164 | 0.495856987 |
| LAMB1      | 7q31.1        | -0.04558 | 0.374338 | 0.496054449 |
| CLRN1-AS1  | 3q25.1        | -0.04557 | 0.374419 | 0.496114511 |
| SRP14      | 15q15.1       | -0.04557 | 0.374433 | 0.496114511 |
| CTLA4      | 2q33.2        | 0.045561 | 0.374532 | 0.496213388 |
| MICAL3     | 22q11.21      | -0.04556 | 0.374587 | 0.496252402 |
| MYH7       | 14q11.2       | 0.045542 | 0.374722 | 0.496399111 |
| NAA11      | 4q21.21       | -0.04552 | 0.374926 | 0.496636514 |
| MRPL20     | 1p36.33       | -0.04552 | 0.374984 | 0.496680852 |
| MAP3K2     | 2q14.3        | 0.045488 | 0.375297 | 0.497037484 |
| PDX1       | 13q12.2       | 0.045487 | 0.375303 | 0.497037484 |
| MEIS3P1    | 17p12         | -0.04548 | 0.375423 | 0.497163409 |
| CLUL1      | 18p11.32      | -0.04546 | 0.375557 | 0.497295157 |
| BSPH1      | 19q13.33      | -0.04546 | 0.375572 | 0.497295157 |
| SEC14L5    | 16p13.3       | 0.045455 | 0.375644 | 0.497356774 |
| KRT27      | 17q21.2       | 0.045422 | 0.375986 | 0.497777076 |
| ANXA8      | 10q11.22      | -0.04539 | 0.376348 | 0.498223276 |
| SLIT2      | 4p15.31       | -0.04538 | 0.376408 | 0.498253684 |
| PSG3       | 19q13.2       | 0.045381 | 0.376421 | 0.498253684 |
| GTSF1L     | 20q13.12      | 0.045377 | 0.376458 | 0.498270301 |
| PADI6      | 1p36.13       | -0.04536 | 0.376634 | 0.498469561 |
| ASXL3      | 18q12.1       | 0.045355 | 0.376696 | 0.49851952  |
| KLHL17     | 1p36.33       | -0.04534 | 0.376841 | 0.498678585 |
| NCKIPSD    | 3p21.31       | -0.04533 | 0.376987 | 0.498807763 |

|           |              |          |          |             |
|-----------|--------------|----------|----------|-------------|
| SLC9A3    | 5p15.33      | 0.045327 | 0.376989 | 0.498807763 |
| UBD       | 6p22.1       | -0.04532 | 0.377109 | 0.498933892 |
| NMS       | 2q11.2       | -0.0453  | 0.377303 | 0.499153166 |
| SH3GLB2   | 9q34.11      | 0.045295 | 0.377325 | 0.499153166 |
| NIPA2     | 15q11.2      | 0.045275 | 0.377533 | 0.499357322 |
| MMP9      | 20q13.12     | -0.04527 | 0.377543 | 0.499357322 |
| PRSS41    | 16p13.3      | -0.04527 | 0.377554 | 0.499357322 |
| PDIA4     | 7q36.1       | 0.045267 | 0.377624 | 0.499396672 |
| FDX1      | 11q22.3      | 0.045266 | 0.377633 | 0.499396672 |
| GYPB      | 4q31.21      | -0.0452  | 0.378379 | 0.500349415 |
| C2ORF74   | 2p15         | -0.04515 | 0.37884  | 0.500926683 |
| DNM1L     | 12p11.21     | -0.04515 | 0.37889  | 0.500959797 |
| CPED1     | 7q31.31      | -0.04514 | 0.379009 | 0.501055008 |
| OR8D1     | 11q24.2      | 0.045135 | 0.379012 | 0.501055008 |
| ARHGAP15  | 2q22.2-q22.3 | 0.04513  | 0.379066 | 0.501092243 |
| EMID1     | 22q12.2      | -0.04512 | 0.379148 | 0.501161697 |
| UACA      | 15q23        | -0.04512 | 0.379182 | 0.501161697 |
| LINC00588 | 8q12.1       | 0.045118 | 0.379193 | 0.501161697 |
| DDX58     | 9p21.1       | 0.045114 | 0.379232 | 0.50117959  |
| CDC5L     | 6p21.1       | -0.04511 | 0.379257 | 0.501179616 |
| SPINT4    | 20q13.12     | 0.045108 | 0.379297 | 0.501200238 |
| KCNC4     | 1p13.3       | 0.045094 | 0.37945  | 0.501369233 |
| ITGB6     | 2q24.2       | -0.04507 | 0.379678 | 0.501637122 |
| RBMXL3    | Xq23         | -0.04507 | 0.379749 | 0.501697678 |
| PON1      | 7q21.3       | 0.04506  | 0.379805 | 0.501738823 |
| RB1       | 13q14.2      | 0.045031 | 0.380114 | 0.502112895 |
| LRRC42    | 1p32.3       | -0.045   | 0.380469 | 0.502549709 |
| AGPAT1    | 6p21.32      | 0.044992 | 0.380533 | 0.502600936 |
| CCDC65    | 12q13.12     | 0.044985 | 0.3806   | 0.502655855 |
| RHPN2     | 19q13.11     | 0.044961 | 0.380862 | 0.502968631 |
| NOP10     | 15q14        | 0.044941 | 0.381067 | 0.503206803 |
| TMCO6     | 5q31.3       | -0.04491 | 0.381424 | 0.503644122 |
| ERLEC1    | 2p16.2       | 0.044893 | 0.381577 | 0.503809023 |
| OR8D4     | 11q24.1      | -0.04489 | 0.381599 | 0.503809023 |
| MT1B      | 16q13        | 0.044882 | 0.381694 | 0.503901679 |
| RAD17     | 5q13.2       | 0.044875 | 0.381774 | 0.503953842 |
| AFM       | 4q13.3       | 0.044874 | 0.381784 | 0.503953842 |
| CCND2     | 12p13.32     | -0.04487 | 0.381842 | 0.503997014 |
| POLL      | 10q24.32     | -0.04487 | 0.381872 | 0.504003028 |
| SIX6      | 14q23.1      | -0.04485 | 0.382074 | 0.504236585 |
| TSNAX     | 1q42.2       | 0.044834 | 0.382203 | 0.504264196 |
| MYL2      | 12q24.11     | 0.044834 | 0.382209 | 0.504264196 |
| ARGFXP2   | 17q11.2      | -0.04483 | 0.382211 | 0.504264196 |
| PPIEL     | 1p34.3       | -0.04483 | 0.382215 | 0.504264196 |
| OR10AG1   | 11q12.1      | -0.04483 | 0.382221 | 0.504264196 |
| SBK2      | 19q13.42     | 0.044829 | 0.382253 | 0.504274253 |
| NUAK2     | 1q32.1       | -0.04482 | 0.382313 | 0.504319751 |
| AJAP1     | 1p36.32      | 0.044816 | 0.382399 | 0.504400115 |
| TMEM179   | 14q32.33     | -0.04481 | 0.382464 | 0.504451926 |
| SEZ6L2    | 16p11.2      | 0.044803 | 0.382535 | 0.504470579 |
| SLC39A14  | 8p21.3       | 0.044801 | 0.382551 | 0.504470579 |
| DOK3      | 5q35.3       | 0.044801 | 0.382553 | 0.504470579 |
| ZNF484    | 9q22.31      | 0.044797 | 0.382594 | 0.504491659 |
| HIST1H1T  | 6p22.2       | 0.044777 | 0.382812 | 0.504745846 |
| ZNF598    | 16p13.3      | -0.04477 | 0.382844 | 0.504754289 |
| NCAPD3    | 11q25        | -0.04474 | 0.383231 | 0.505231421 |
| SLC25A41  | 19p13.3      | -0.04473 | 0.383262 | 0.505239334 |
| ITGB1     | 10p11.22     | -0.04472 | 0.383405 | 0.505394496 |

|            |          |          |          |             |
|------------|----------|----------|----------|-------------|
| NOMO1      | 16p13.11 | -0.04469 | 0.383761 | 0.505829628 |
| IL6        | 7p15.3   | -0.04467 | 0.383992 | 0.506101673 |
| GZMH       | 14q12    | 0.044662 | 0.384031 | 0.506119634 |
| FAM153CP   | 5q35.3   | 0.044631 | 0.384367 | 0.506527953 |
| SVIL       | 10p11.23 | -0.04463 | 0.384392 | 0.506527953 |
| SUMO4      | 6q25.1   | -0.04462 | 0.384469 | 0.506596356 |
| MRPS18C    | 4q21.23  | 0.0446   | 0.384697 | 0.506863672 |
| ACSM2B     | 16p12.3  | -0.04459 | 0.384802 | 0.50696343  |
| RASGRP3    | 2p22.3   | -0.04459 | 0.384844 | 0.50696343  |
| NXF4       | Xq22.1   | -0.04459 | 0.384849 | 0.50696343  |
| TASOR      | 3p14.3   | -0.04458 | 0.384952 | 0.507066193 |
| NLRP4      | 19q13.43 | -0.04455 | 0.385183 | 0.507317237 |
| ATP2B2     | 3p25.3   | -0.04455 | 0.385206 | 0.507317237 |
| MYO9A      | 15q23    | 0.044551 | 0.385219 | 0.507317237 |
| FRMD8      | 11q13.1  | 0.044531 | 0.38543  | 0.507562405 |
| SFTP8      | 2p11.2   | -0.04451 | 0.385649 | 0.507817278 |
| ARG1       | 6q23.2   | 0.044493 | 0.385845 | 0.508041554 |
| HSD17B12   | 11p11.2  | -0.04447 | 0.386093 | 0.50833464  |
| HEATR6     | 17q23.1  | -0.04446 | 0.386173 | 0.508401066 |
| ADAMTS8    | 11q24.3  | 0.04446  | 0.386196 | 0.508401066 |
| ZNF641     | 12q13.11 | -0.04446 | 0.386219 | 0.508401066 |
| ZAR1L      | 13q13.1  | -0.04445 | 0.386306 | 0.508482225 |
| NELFA      | 4p16.3   | -0.04442 | 0.386626 | 0.5088692   |
| ZNF326     | 1p22.2   | -0.04437 | 0.387139 | 0.509510659 |
| BPIFB3     | 20q11.21 | -0.04437 | 0.387177 | 0.509525418 |
| EXOC3L1    | 16q22.1  | 0.044365 | 0.38721  | 0.509525418 |
| LINC00596  | 14q11.2  | 0.044362 | 0.387239 | 0.509525418 |
| SOBP       | 6q21     | 0.044361 | 0.387252 | 0.509525418 |
| M6PR       | 12p13.31 | -0.04435 | 0.38733  | 0.509537258 |
| CEACAM6    | 19q13.2  | -0.04435 | 0.387335 | 0.509537258 |
| CBLN3      | 14q12    | 0.044353 | 0.387337 | 0.509537258 |
| IL1RAP     | 3q28     | 0.044348 | 0.387392 | 0.509576603 |
| ARHGEF3    | 3p14.3   | 0.044329 | 0.3876   | 0.509816216 |
| RGPD8      | 2q14.1   | -0.04431 | 0.387785 | 0.51002597  |
| KRT17P5    | 17p11.2  | 0.044297 | 0.387934 | 0.51018933  |
| ZNF295-AS1 | 21q22.3  | -0.04428 | 0.388082 | 0.510349476 |
| AQP8       | 16p12.1  | 0.04426  | 0.388334 | 0.510647859 |
| TGFBR2     | 3p24.1   | -0.04425 | 0.388443 | 0.510735482 |
| NBN        | 8q21.3   | -0.04425 | 0.388452 | 0.510735482 |
| TPTE2      | 13q12.11 | -0.04424 | 0.38852  | 0.510791419 |
| PTGS1      | 9q33.2   | 0.044222 | 0.388738 | 0.511045158 |
| SLC22A24   | 11q12.3  | -0.0442  | 0.388926 | 0.511258048 |
| ITGA1      | 5q11.2   | 0.044197 | 0.389016 | 0.51134273  |
| C8ORF86    | 8p11.22  | -0.04419 | 0.389084 | 0.511394147 |
| EPS8       | 12p12.3  | 0.044188 | 0.389106 | 0.511394147 |
| U2AF1      | 21q22.3  | -0.04418 | 0.389159 | 0.511430495 |
| MAPK11     | 22q13.33 | 0.044152 | 0.389492 | 0.511834714 |
| CCDC144B   | 17p11.2  | 0.044136 | 0.38967  | 0.512034457 |
| LATS1      | 6q25.1   | 0.044133 | 0.389698 | 0.512038202 |
| REC8       | 14q12    | -0.04413 | 0.389775 | 0.512104979 |
| CSDE1      | 1p13.2   | 0.044114 | 0.389907 | 0.51222958  |
| ADORA3     | 1p13.2   | 0.044111 | 0.389932 | 0.51222958  |
| UMOD       | 16p12.3  | 0.044108 | 0.389966 | 0.51222958  |
| ANTXR1     | 10q11.22 | -0.04411 | 0.389972 | 0.51222958  |
| FZD8       | 10p11.21 | -0.0441  | 0.390078 | 0.512335472 |
| CDH24      | 14q11.2  | -0.04406 | 0.390476 | 0.51282524  |
| OR52K1     | 11p15.4  | -0.04406 | 0.390518 | 0.512845759 |
| SLC29A4    | 7p22.1   | -0.04405 | 0.390604 | 0.512925357 |

|              |                |          |          |             |
|--------------|----------------|----------|----------|-------------|
| HELLS        | 10q23.33       | 0.044042 | 0.390673 | 0.512983078 |
| TRIM32       | 9q33.1         | 0.044039 | 0.390706 | 0.512992062 |
| FCGR1A       | 1q21.2         | -0.04403 | 0.390799 | 0.513080161 |
| SEMA6A       | 5q23.1         | 0.044017 | 0.390945 | 0.513235165 |
| CELF6        | 15q23          | 0.044015 | 0.390968 | 0.513235165 |
| PLEKHM2      | 1p36.21        | -0.04401 | 0.391072 | 0.513338539 |
| RRAGD        | 6q15           | -0.04399 | 0.391237 | 0.513521101 |
| C2CD3        | 11q13.4        | 0.043987 | 0.391267 | 0.513527038 |
| SELENOF      | 1p22.3         | 0.043958 | 0.391578 | 0.513901554 |
| HSPA14       | 10p13          | -0.04396 | 0.391606 | 0.513904439 |
| KRTAP4-7     | 17q21.2        | -0.04395 | 0.391677 | 0.513964072 |
| KDM7A        | 7q34           | -0.04395 | 0.391706 | 0.5139681   |
| ITGA4        | 2q31.3         | 0.043928 | 0.39191  | 0.514202568 |
| TSKU         | 11q13.5        | 0.043919 | 0.392001 | 0.514287736 |
| SHOX2        | 3q25.32        | 0.043897 | 0.392242 | 0.514570086 |
| SLC38A10     | 17q25.3        | 0.043889 | 0.392324 | 0.514644051 |
| RHOT2        | 16p13.3        | -0.04388 | 0.392403 | 0.514714004 |
| LOC100240734 | 12q13.13       | 0.043873 | 0.392499 | 0.514806212 |
| IRX5         | 16q12.2        | -0.04387 | 0.392584 | 0.514884408 |
| TTY2         | Yp11.2         | 0.043858 | 0.392666 | 0.514958282 |
| IPO13        | 1p34.1         | -0.04384 | 0.392852 | 0.515167705 |
| DPPA4        | 3q13.13        | 0.043829 | 0.392981 | 0.515303031 |
| RMDN2        | 2p22.2         | -0.04382 | 0.393041 | 0.515348821 |
| TBC1D3       | 17q12          | -0.0438  | 0.393301 | 0.515645464 |
| PAXBP1       | 21q22.11       | -0.0438  | 0.393326 | 0.515645464 |
| PCDHA3       | 5q31.3         | -0.04379 | 0.393345 | 0.515645464 |
| MNDA         | 1q23.1         | 0.043782 | 0.39348  | 0.51578902  |
| FAT2         | 5q33.1         | 0.043775 | 0.393565 | 0.515866529 |
| RPLP0        | 12q24.23       | -0.04377 | 0.393608 | 0.515889401 |
| MCHR2        | 6q16.2         | -0.04376 | 0.39369  | 0.515962599 |
| ZRANB2       | 1p31.1         | -0.04375 | 0.393806 | 0.516081335 |
| RNF26        | 11q23.3        | -0.04374 | 0.39393  | 0.51620937  |
| MYEOV        | 11q13.3        | 0.043685 | 0.394533 | 0.516966685 |
| ADGB         | 6q24.3         | -0.04365 | 0.394884 | 0.517392737 |
| GPR89B       | 1q21.2         | -0.04364 | 0.395014 | 0.517528691 |
| CDY2B        | Yq11.222       | 0.043608 | 0.395367 | 0.517956989 |
| C12ORF43     | 12q24.31       | 0.043606 | 0.395396 | 0.517960959 |
| MRPS14       | 1q25.1         | -0.04358 | 0.39571  | 0.518326778 |
| SLC7A5P1     | 16p11.2        | -0.04358 | 0.395727 | 0.518326778 |
| ATXN7L3B     | 12q21.1        | -0.04356 | 0.395866 | 0.518475866 |
| FOXN3        | 14q31.3-q32.11 | 0.043557 | 0.395927 | 0.518505273 |
| PKHD1L1      | 8q23.1-q23.2   | 0.043555 | 0.395941 | 0.518505273 |
| PRKAG3       | 2q35           | -0.04355 | 0.395973 | 0.518514325 |
| MPZL3        | 11q23.3        | -0.04355 | 0.396049 | 0.518578971 |
| PAX7         | 1p36.13        | -0.04354 | 0.396116 | 0.518633608 |
| ANKRD20A11P  | 21q11.2        | -0.04352 | 0.396298 | 0.518838253 |
| CFH          | 1q31.3         | -0.0435  | 0.396526 | 0.519101508 |
| LSR          | 19q13.12       | 0.043499 | 0.396551 | 0.519101508 |
| VDAC1        | 5q31.1         | 0.043491 | 0.39664  | 0.51915831  |
| SPATA8       | 15q26.2        | -0.04349 | 0.396647 | 0.51915831  |
| GOLT1B       | 12p12.1        | -0.04349 | 0.396685 | 0.519174266 |
| RGS7BP       | 5q12.3         | -0.04348 | 0.396713 | 0.519177446 |
| SNX19        | 11q24.3-q25    | -0.04347 | 0.396825 | 0.519255975 |
| IL4          | 5q31.1         | 0.043473 | 0.396836 | 0.519255975 |
| MPST         | 22q12.3        | -0.04347 | 0.396851 | 0.519255975 |
| ECHDC1       | 6q22.33        | -0.04347 | 0.396916 | 0.519307793 |
| CRISP1       | 6p12.3         | 0.043461 | 0.39697  | 0.519344436 |
| NDUFA4L2     | 12q13.3        | -0.04345 | 0.397054 | 0.51942062  |

|           |                    |          |          |             |
|-----------|--------------------|----------|----------|-------------|
| MT1IP     | 16q13              | -0.04345 | 0.397105 | 0.519429855 |
| ADPRHL1   | 13q34              | 0.043446 | 0.397129 | 0.519429855 |
| GPLD1     | 6p22.3             | -0.04344 | 0.397139 | 0.519429855 |
| OR3A4P    | 17p13.3            | -0.04344 | 0.397206 | 0.519449712 |
| PSG10P    | 19q13.2            | 0.043439 | 0.397206 | 0.519449712 |
| EBLN2     | 3p13               | -0.04341 | 0.397535 | 0.519844893 |
| TBRG1     | 11q24.2            | -0.0434  | 0.397591 | 0.519884509 |
| CLLU1OS   | 12q22              | -0.04338 | 0.397829 | 0.520122759 |
| SGO1      | 3p24.3             | 0.04338  | 0.397851 | 0.520122759 |
| B4GALT2   | 1p34.1             | -0.04338 | 0.397851 | 0.520122759 |
| STAG3L4   | 7q11.21            | 0.043372 | 0.397931 | 0.520192991 |
| BTRC      | 10q24.32           | -0.04337 | 0.397967 | 0.520206501 |
| TNFRSF11B | 8q24.12            | 0.043365 | 0.398013 | 0.520232336 |
| MRPS2     | 9q34.3             | 0.043362 | 0.398043 | 0.52023822  |
| SLCO4C1   | 5q21.1             | 0.04334  | 0.398283 | 0.520517603 |
| KLK9      | 19q13.41           | 0.043321 | 0.398488 | 0.520752162 |
| TIMELESS  | 12q13.3            | 0.043315 | 0.398559 | 0.520810663 |
| STOML3    | 13q13.3            | -0.04331 | 0.398629 | 0.520865344 |
| STXBP3    | 1p13.3             | 0.043306 | 0.398653 | 0.520865344 |
| SARNP     | 12q13.2            | -0.04329 | 0.398806 | 0.520982058 |
| KCNN4     | 19q13.31           | 0.043292 | 0.398808 | 0.520982058 |
| BNIP5     | 6p21.31            | -0.04329 | 0.398843 | 0.520982058 |
| OVCH1     | 12p11.22           | 0.043288 | 0.398846 | 0.520982058 |
| CXCL6     | 4q13.3             | -0.04322 | 0.399555 | 0.52185461  |
| CD36      | 7q21.11            | 0.043222 | 0.399567 | 0.52185461  |
| UGT2B4    | 4q13.3             | 0.043216 | 0.399631 | 0.521904325 |
| PPP2R3A   | 3q22.2-q22.3       | 0.043181 | 0.400013 | 0.522362173 |
| CPXCR1    | Xq21.31            | -0.04318 | 0.400033 | 0.522362173 |
| HIST2H3D  | 1q21.2             | -0.04318 | 0.400069 | 0.522375148 |
| USP5      | 12p13.31           | -0.04317 | 0.400133 | 0.522424237 |
| SIT1      | 9p13.3             | -0.04317 | 0.400166 | 0.522433169 |
| TOMM20    | 1q42.3             | 0.043157 | 0.400281 | 0.522549581 |
| SHOX      | Xp22.33 and Yp11.2 | -0.04315 | 0.400316 | 0.522560411 |
| SCN3A     | 2q24.3             | 0.043144 | 0.400418 | 0.522659797 |
| GUCA2A    | 1p34.2             | -0.04314 | 0.400449 | 0.522665818 |
| TXNDC15   | 5q31.1             | -0.04314 | 0.4005   | 0.522698945 |
| CDC14A    | 1p21.2             | 0.043129 | 0.40059  | 0.52278159  |
| CMTR2     | 16q22.2            | 0.043113 | 0.400761 | 0.522881902 |
| HPD       | 12q24.31           | -0.04311 | 0.400769 | 0.522881902 |
| ZNF844    | 19p13.2            | -0.04311 | 0.400841 | 0.522881902 |
| ZNF296    | 19q13.32           | -0.04311 | 0.400843 | 0.522881902 |
| SERHL     | 22q13.2            | -0.04311 | 0.400846 | 0.522881902 |
| MYCNOS    | 2p24.3             | -0.0431  | 0.40086  | 0.522881902 |
| MS4A14    | 11q12.2            | 0.043104 | 0.400861 | 0.522881902 |
| OSBPL6    | 2q31.2             | -0.0431  | 0.400875 | 0.522881902 |
| PLAC8L1   | 5q32               | -0.0431  | 0.400919 | 0.522904509 |
| ATP2B3    | Xq28               | -0.04309 | 0.401003 | 0.522980452 |
| LIPJ      | 10q23.31           | 0.043087 | 0.401049 | 0.523006928 |
| NDUFV3    | 21q22.3            | 0.043057 | 0.401371 | 0.523392627 |
| HOMER2    | 15q25.2            | -0.04303 | 0.401622 | 0.523684977 |
| KBTBD8    | 3p14.1             | -0.04303 | 0.401723 | 0.523782357 |
| TMEM255A  | Xq24               | 0.04302  | 0.401774 | 0.523815815 |
| DPM3      | 1q22               | 0.043012 | 0.401864 | 0.523898589 |
| SQSTM1    | 5q35.3             | -0.04299 | 0.402072 | 0.52413503  |
| UBB       | 17p11.2            | 0.042987 | 0.402138 | 0.524187009 |
| SYNRG     | 17q12              | 0.042981 | 0.402204 | 0.52423899  |
| OR10K2    | 1q23.1             | 0.042974 | 0.402279 | 0.524303247 |
| WEE2-AS1  | 7q34               | -0.04297 | 0.402358 | 0.524372138 |

|              |          |          |          |             |
|--------------|----------|----------|----------|-------------|
| GMCL1        | 2p13.3   | 0.042964 | 0.40239  | 0.524379565 |
| ZNF699       | 19p13.2  | 0.042956 | 0.402474 | 0.524454585 |
| IFT43        | 14q24.3  | -0.04295 | 0.402552 | 0.524521952 |
| OR4C3        | 11p11.2  | -0.04295 | 0.402589 | 0.52453595  |
| LRRC52       | 1q24.1   | -0.04293 | 0.402776 | 0.524746328 |
| ZNF8         | 19q13.43 | 0.042899 | 0.403105 | 0.525141011 |
| CPN2         | 3q29     | -0.04289 | 0.403153 | 0.525168341 |
| MTR          | 1q43     | -0.04289 | 0.403226 | 0.52521223  |
| LINC00964    | 8q24.13  | -0.04289 | 0.403239 | 0.52521223  |
| MAP3K11      | 11q13.1  | -0.04288 | 0.403278 | 0.525229036 |
| FOXA2        | 20p11.21 | -0.04287 | 0.403446 | 0.525413398 |
| P2RY14       | 3q25.1   | 0.042864 | 0.403488 | 0.525434572 |
| PRR13        | 12q13.13 | 0.042861 | 0.403519 | 0.525440487 |
| DKFZP434A062 | 9q34.3   | -0.04285 | 0.40366  | 0.525559923 |
| RAB11FIP4    | 17q11.2  | -0.04285 | 0.403663 | 0.525559923 |
| RBL2         | 16q12.2  | 0.042824 | 0.403923 | 0.52586441  |
| SPANXC       | Xq27.2   | -0.04281 | 0.404085 | 0.526040594 |
| CD9          | 12p13.31 | 0.042793 | 0.404273 | 0.526251837 |
| TSKS         | 19q13.33 | -0.04279 | 0.404336 | 0.526275841 |
| CPNE2        | 16q13    | 0.042786 | 0.404344 | 0.526275841 |
| PLA2G1B      | 12q24.31 | 0.042776 | 0.404452 | 0.526352215 |
| GON4L        | 1q22     | 0.042776 | 0.404456 | 0.526352215 |
| SCGB3A2      | 5q32     | -0.04276 | 0.404634 | 0.526550015 |
| OR8G5        | 11q24.2  | -0.04275 | 0.404715 | 0.526621659 |
| ZNF664       | 12q24.31 | -0.04274 | 0.404891 | 0.526794605 |
| MAP2K7       | 19p13.2  | 0.042735 | 0.404901 | 0.526794605 |
| C1QTNF2      | 5q33.3   | -0.04271 | 0.405131 | 0.527033697 |
| NME9         | 3q22.3   | 0.042713 | 0.405152 | 0.527033697 |
| PCDHA6       | 5q31.3   | -0.04271 | 0.405183 | 0.527033697 |
| FAM171A2     | 17q21.31 | -0.04271 | 0.40519  | 0.527033697 |
| LINC01366    | 5q35.1   | 0.042698 | 0.405317 | 0.52716455  |
| LLGL2        | 17q25.1  | 0.042694 | 0.405361 | 0.527187163 |
| RHAG         | 6p12.3   | -0.04269 | 0.405393 | 0.527195074 |
| SAA2         | 11p15.1  | 0.042685 | 0.405459 | 0.527229019 |
| CCDC159      | 19p13.2  | -0.04268 | 0.405486 | 0.527229019 |
| SGO2         | 2q33.1   | -0.04268 | 0.405498 | 0.527229019 |
| LRRK1        | 15q26.3  | 0.042663 | 0.405697 | 0.527384938 |
| NDUFB8       | 10q24.31 | -0.04266 | 0.405716 | 0.527384938 |
| SNORA25      | 11q21    | 0.042661 | 0.405716 | 0.527384938 |
| MYO1B        | 2q32.3   | -0.04266 | 0.405723 | 0.527384938 |
| GRIA2        | 4q32.1   | -0.04264 | 0.406001 | 0.52769613  |
| OR9K2        | 12q13.2  | 0.042634 | 0.406015 | 0.52769613  |
| KRTAP2-4     | 17q21.2  | -0.04263 | 0.40611  | 0.527785008 |
| PRR12        | 19q13.33 | -0.04261 | 0.406274 | 0.52796332  |
| ZMYND11      | 10p15.3  | 0.042608 | 0.406305 | 0.527969157 |
| SGSH         | 17q25.3  | -0.0426  | 0.406366 | 0.528015091 |
| TSPAN11      | 12p11.21 | -0.0426  | 0.406407 | 0.528033267 |
| PLAC9P1      | 2q21.1   | 0.04257  | 0.406719 | 0.528405093 |
| TRMT5        | 14q23.1  | -0.04256 | 0.406806 | 0.528483007 |
| GPR37        | 7q31.33  | 0.042557 | 0.406867 | 0.528528955 |
| OLR1         | 12p13.2  | -0.04255 | 0.406972 | 0.52863045  |
| PNLIPRP2     | 10q25.3  | -0.04254 | 0.407105 | 0.52876896  |
| C8ORF34      | 8q13.2   | -0.04253 | 0.407181 | 0.528833349 |
| ZNF841       | 19q13.41 | -0.04253 | 0.407212 | 0.528839294 |
| LRRC7        | 1p31.1   | -0.04251 | 0.407394 | 0.529041289 |
| GABRB2       | 5q34     | -0.04251 | 0.407439 | 0.529065501 |
| UPK3B        | 7q11.2   | 0.042482 | 0.407697 | 0.529346519 |
| TUBA3D       | 2q21.1   | 0.042481 | 0.407708 | 0.529346519 |

|           |                    |          |          |             |
|-----------|--------------------|----------|----------|-------------|
| PRMT8     | 12p13.32           | -0.04247 | 0.40781  | 0.529444424 |
| COQ3      | 6q16.2             | 0.042463 | 0.407904 | 0.529531895 |
| PRPF4B    | 6p25.2             | -0.04245 | 0.408077 | 0.529723041 |
| LYG2      | 2q11.2             | -0.04244 | 0.408115 | 0.529736899 |
| UNC13C    | 15q21.3            | 0.042426 | 0.408314 | 0.529961658 |
| C11ORF42  | 11p15.4            | 0.042414 | 0.408444 | 0.530095766 |
| DUSP19    | 2q32.1             | -0.04241 | 0.408483 | 0.530112399 |
| H2AFY     | 5q31.1             | -0.0424  | 0.408565 | 0.530161979 |
| MYL1      | 2q34               | -0.0424  | 0.408581 | 0.530161979 |
| SECISBP2  | 9q22.2             | -0.0424  | 0.408627 | 0.530161979 |
| MARCKSL1  | 1p35.1             | 0.042398 | 0.408627 | 0.530161979 |
| RAET1L    | 6q25.1             | -0.04239 | 0.408764 | 0.530304405 |
| INPP5D    | 2q37.1             | -0.04236 | 0.409073 | 0.530641561 |
| ZFP57     | 6p22.1             | -0.04236 | 0.409077 | 0.530641561 |
| DYNAP     | 18q21.2            | 0.042353 | 0.409121 | 0.53066523  |
| PDCD1LG2  | 9p24.1             | 0.042346 | 0.409203 | 0.53070994  |
| ANKRA2    | 5q13.2             | 0.042345 | 0.409209 | 0.53070994  |
| MS4A13    | 11q12.2            | -0.04233 | 0.409396 | 0.530917999 |
| TTY10     | Yq11.223           | -0.04232 | 0.409504 | 0.531024532 |
| GPR150    | 5q15               | 0.042312 | 0.409581 | 0.531054749 |
| AGO4      | 1p34.3             | 0.042312 | 0.409581 | 0.531054749 |
| COL20A1   | 20q13.33           | -0.0423  | 0.409688 | 0.531126404 |
| ARPP21    | 3p22.3             | -0.0423  | 0.409689 | 0.531126404 |
| ATP5MD    | 10q24.33           | 0.042262 | 0.410134 | 0.53166915  |
| CHST11    | 12q23.3            | -0.04225 | 0.410289 | 0.531816948 |
| ALOX12B   | 17p13.1            | 0.042247 | 0.410301 | 0.531816948 |
| LINC00284 | 13q14.11           | 0.042242 | 0.410356 | 0.531854028 |
| RPP14     | 3p14.3             | -0.04223 | 0.410437 | 0.531924452 |
| SH2D4B    | 10q23.1            | 0.042229 | 0.410496 | 0.531966583 |
| TUBGCP6   | 22q13.33           | -0.04221 | 0.410738 | 0.532220032 |
| ANXA5     | 4q27               | -0.04221 | 0.410757 | 0.532220032 |
| ABHD11    | 7q11.23            | 0.042204 | 0.410772 | 0.532220032 |
| IL3RA     | Xp22.33 and Yp11.2 | -0.0422  | 0.410839 | 0.532268756 |
| APOO      | Xp22.11            | -0.0422  | 0.410862 | 0.532268756 |
| TERC      | 3q26.2             | -0.04219 | 0.410973 | 0.532355035 |
| CR1L      | 1q32.2             | 0.042185 | 0.410982 | 0.532355035 |
| DDIT4     | 10q22.1            | 0.042179 | 0.411056 | 0.532384882 |
| ZNF28     | 19q13.41           | 0.042178 | 0.411058 | 0.532384882 |
| MAK16     | 8p12               | 0.04217  | 0.411147 | 0.532456937 |
| LCNL1     | 9q34.3             | -0.04217 | 0.411167 | 0.532456937 |
| TRAM1     | 8q13.3             | -0.04216 | 0.411264 | 0.532497514 |
| GLMN      | 1p22.1             | -0.04216 | 0.411271 | 0.532497514 |
| GOLGA2P5  | 12q23.1            | 0.042159 | 0.411278 | 0.532497514 |
| ATMIN     | 16q23.2            | 0.04214  | 0.411486 | 0.532732406 |
| ATG13     | 11p11.2            | -0.04213 | 0.411601 | 0.532824525 |
| SF3B5     | 6q24.2             | -0.04213 | 0.411611 | 0.532824525 |
| NIPBL     | 5p13.2             | 0.042105 | 0.411879 | 0.533136905 |
| SNAP91    | 6q14.2             | -0.0421  | 0.411907 | 0.533139205 |
| SNORA37   | 18q21.2            | -0.04209 | 0.412062 | 0.533304987 |
| PARVG     | 22q13.31           | 0.042083 | 0.41212  | 0.53334636  |
| OR10G8    | 11q24.2            | -0.04208 | 0.412163 | 0.533367218 |
| PCDHB14   | 5q31.3             | 0.042071 | 0.412252 | 0.533447804 |
| VPS29     | 12q24.11           | 0.042066 | 0.412305 | 0.533481489 |
| CCDC144NL | 17p11.2            | -0.04206 | 0.412376 | 0.533539181 |
| UCN3      | 10p15.1            | 0.042057 | 0.412404 | 0.533539181 |
| PRR5      | 22q13.31           | -0.04205 | 0.412429 | 0.533539181 |
| OR5F1     | 11q12.1            | -0.04205 | 0.41254  | 0.533647832 |
| TRPC5     | Xq23               | 0.042042 | 0.412572 | 0.533654349 |



|            |              |          |          |             |
|------------|--------------|----------|----------|-------------|
| PHF21B     | 22q13.31     | -0.04203 | 0.412662 | 0.533736605 |
| HARS       | 5q31.3       | 0.042031 | 0.412695 | 0.533745195 |
| TMEM44     | 3q29         | -0.04202 | 0.412784 | 0.533793991 |
| CDK2AP1    | 12q24.31     | -0.04202 | 0.412786 | 0.533793991 |
| STX8       | 17p13.1      | -0.04201 | 0.412967 | 0.533960935 |
| C20ORF144  | 20q11.22     | -0.04201 | 0.412969 | 0.533960935 |
| ANKRD20A8P | 2q11.1       | -0.04198 | 0.413279 | 0.53431829  |
| BEX5       | Xq22.1       | -0.04198 | 0.413298 | 0.53431829  |
| LAMA2      | 6q22.33      | -0.04197 | 0.413397 | 0.534411844 |
| TTC16      | 9q34.11      | -0.04196 | 0.413452 | 0.534447785 |
| DGKB       | 7p21.2       | 0.041955 | 0.413542 | 0.534473308 |
| DCBLD1     | 6q22.1       | 0.041954 | 0.413548 | 0.534473308 |
| ETV2       | 19q13.12     | -0.04195 | 0.413577 | 0.534473308 |
| CT45A5     | Xq26.3       | -0.04195 | 0.413578 | 0.534473308 |
| HCG4       | 6p22.1       | -0.04195 | 0.413642 | 0.534521248 |
| KRT6B      | 12q13.13     | -0.04194 | 0.413759 | 0.53463734  |
| SHC2       | 19p13.3      | 0.041933 | 0.413786 | 0.534638084 |
| CAMK1      | 3p25.3       | -0.04192 | 0.413939 | 0.534802005 |
| SMC1B      | 22q13.31     | -0.04191 | 0.414087 | 0.534957987 |
| OR10G4     | 11q24.2      | -0.0419  | 0.414122 | 0.534968288 |
| COMMD9     | 11p13        | -0.04188 | 0.41436  | 0.535241168 |
| SUSD4      | 1q41         | -0.04187 | 0.414471 | 0.535351223 |
| DIPK2A     | 3q24         | 0.041862 | 0.414583 | 0.535460603 |
| RACGAP1P   | 12q12        | -0.04185 | 0.414692 | 0.535546658 |
| GUCA1B     | 6p21.1       | -0.04185 | 0.414703 | 0.535546658 |
| KCNG2      | 18q23        | -0.04185 | 0.414745 | 0.535566277 |
| CC2D1B     | 1p32.3       | 0.04184  | 0.414826 | 0.535597907 |
| CYSRT1     | 9q34.3       | -0.04184 | 0.414832 | 0.535597907 |
| TPD52L3    | 9p24.1       | 0.041838 | 0.41485  | 0.535597907 |
| OR2J2      | 6p22.1       | 0.041815 | 0.4151   | 0.535886468 |
| CFAP44     | 3q13.2       | 0.041794 | 0.415338 | 0.536158642 |
| MELK       | 9p13.2       | 0.041788 | 0.415402 | 0.536207893 |
| BPIFC      | 22q12.3      | -0.04177 | 0.415657 | 0.536502162 |
| GOLGA8EP   | 15q11.2      | -0.04176 | 0.415758 | 0.536597102 |
| ARHGAP33   | 19q13.12     | -0.04175 | 0.415819 | 0.536641304 |
| SH3TC2     | 5q32         | -0.04174 | 0.415941 | 0.536765103 |
| HIST2H2AB  | 1q21.2       | -0.04172 | 0.416149 | 0.536998162 |
| CHCHD1     | 10q22.2      | 0.041697 | 0.416425 | 0.537320319 |
| PCDHAC2    | 5q31.3       | -0.04168 | 0.416618 | 0.53751168  |
| LEAP2      | 5q31.1       | 0.041678 | 0.41664  | 0.53751168  |
| TMEM26     | 10q21.2      | -0.04168 | 0.416654 | 0.53751168  |
| PPP4R2     | 3p13         | -0.04167 | 0.416682 | 0.537512764 |
| PCDHA12    | 5q31.3       | -0.04166 | 0.416838 | 0.537677759 |
| ACAT2      | 6q25.3       | -0.04166 | 0.416881 | 0.537677759 |
| CXADR      | 21q21.1      | -0.04166 | 0.41689  | 0.537677759 |
| CPLX3      | 15q24.1      | 0.041649 | 0.416963 | 0.537737276 |
| BTF3P11    | 13q22.3      | -0.04163 | 0.417216 | 0.53802841  |
| HNRNPA2B1  | 7p15.2       | -0.04162 | 0.417252 | 0.538039698 |
| KIF5C      | 2q23.1-q23.2 | -0.04162 | 0.417278 | 0.538039698 |
| FAM120AOS  | 9q22.31      | -0.04162 | 0.417334 | 0.538076564 |
| PHC2       | 1p35.1       | -0.04161 | 0.417404 | 0.538132086 |
| BCL9L      | 11q23.3      | -0.04159 | 0.417667 | 0.538436382 |
| ZNF432     | 19q13.41     | 0.041556 | 0.418001 | 0.538832479 |
| SPATS2     | 12q13.12     | -0.04155 | 0.418115 | 0.538945654 |
| CD33       | 19q13.41     | 0.041538 | 0.4182   | 0.538980932 |
| ZNF714     | 19p12        | -0.04154 | 0.418222 | 0.538980932 |
| PRB4       | 12p13.2      | 0.041536 | 0.418224 | 0.538980932 |
| ACYP1      | 14q24.3      | -0.04153 | 0.418306 | 0.539052727 |

|           |          |          |          |             |
|-----------|----------|----------|----------|-------------|
| RGS20     | 8q11.23  | -0.04152 | 0.418374 | 0.539105217 |
| C20ORF141 | 20p13    | -0.04152 | 0.418439 | 0.539154198 |
| SNORA44   | 1p35.3   | -0.04151 | 0.418558 | 0.539272638 |
| AMY2B     | 1p21.1   | -0.0415  | 0.418668 | 0.539374082 |
| TAB2      | 6q25.1   | 0.041495 | 0.41869  | 0.539374082 |
| ST7L      | 1p13.2   | -0.04149 | 0.418734 | 0.539385615 |
| TTF2      | 1p13.1   | 0.041489 | 0.418753 | 0.539385615 |
| CLEC4C    | 12p13.31 | 0.041478 | 0.418877 | 0.5395103   |
| NUDCD2    | 5q34     | -0.04146 | 0.419024 | 0.539664829 |
| DGCR8     | 22q11.21 | -0.04146 | 0.419072 | 0.539692352 |
| PCGF3     | 4p16.3   | 0.041452 | 0.419174 | 0.539788429 |
| TRNAU1AP  | 1p35.3   | 0.041447 | 0.419224 | 0.539819099 |
| OR5B2     | 11q12.1  | 0.04143  | 0.419416 | 0.540030749 |
| MAP2K5    | 15q23    | 0.041426 | 0.419459 | 0.540051688 |
| ZNF564    | 19p13.2  | 0.041416 | 0.41957  | 0.540160212 |
| C21ORF58  | 21q22.3  | 0.041377 | 0.420011 | 0.540692407 |
| TSPAN17   | 5q35.2   | 0.041361 | 0.420193 | 0.540892886 |
| FAM86DP   | 3p12.3   | 0.041358 | 0.420224 | 0.540897108 |
| MIER2     | 19p13.3  | 0.041346 | 0.420359 | 0.54103687  |
| NCEH1     | 3q26.31  | 0.04134  | 0.420425 | 0.541086253 |
| HYI       | 1p34.2   | 0.041319 | 0.420662 | 0.541356968 |
| BRD1      | 22q13.33 | -0.0413  | 0.420849 | 0.541549388 |
| ANKRD22   | 10q23.31 | 0.0413   | 0.420882 | 0.541549388 |
| ZIM3      | 19q13.43 | -0.0413  | 0.420893 | 0.541549388 |
| SAMD1     | 19p13.12 | 0.041284 | 0.421062 | 0.541709466 |
| INSRR     | 1q23.1   | 0.041283 | 0.421072 | 0.541709466 |
| MX2       | 21q22.3  | -0.04128 | 0.421098 | 0.541709466 |
| HIST1H1D  | 6p22.2   | -0.04127 | 0.421271 | 0.541896441 |
| EAPP      | 14q13.1  | 0.041244 | 0.421503 | 0.542160734 |
| CYP4F29P  | 21q11.2  | 0.041238 | 0.421571 | 0.542203999 |
| SNORA11E  | Xp11.22  | 0.041237 | 0.421591 | 0.542203999 |
| FABP5     | 8q21.13  | -0.04123 | 0.421666 | 0.542265297 |
| IL36A     | 2q14.1   | -0.04123 | 0.421701 | 0.542276607 |
| CRCT1     | 1q21.3   | 0.041218 | 0.421797 | 0.542365221 |
| EIF4E1B   | 5q35.2   | 0.041206 | 0.421932 | 0.542503212 |
| SPDYE7P   | 7q11.23  | -0.0412  | 0.422024 | 0.542507766 |
| MSLNL     | 16p13.3  | 0.041198 | 0.422026 | 0.542507766 |
| NAA40     | 11q13.1  | 0.041196 | 0.422049 | 0.542507766 |
| CHMP2A    | 19q13.43 | -0.04119 | 0.422071 | 0.542507766 |
| BATF2     | 11q13.1  | -0.04119 | 0.422071 | 0.542507766 |
| CDKN2A-DT | 9p21.3   | 0.041155 | 0.422508 | 0.543034901 |
| MRPL44    | 2q36.1   | 0.041143 | 0.422651 | 0.543170057 |
| TUBBP5    | 9q34.3   | 0.041139 | 0.422693 | 0.543170057 |
| KCNB2     | 8q21.11  | -0.04114 | 0.422695 | 0.543170057 |
| RUFY3     | 4q13.3   | 0.041133 | 0.422765 | 0.543226157 |
| SURF6     | 9q34.2   | 0.04112  | 0.422909 | 0.543375542 |
| DNAL4     | 22q13.1  | 0.041116 | 0.422953 | 0.543396885 |
| NMD3      | 3q26.1   | 0.041113 | 0.422987 | 0.543405739 |
| PAFAH1B2  | 11q23.3  | 0.041105 | 0.423079 | 0.543489532 |
| ARPC4     | 3p25.3   | -0.04109 | 0.423237 | 0.543657646 |
| HSPA1B    | 6p21.33  | -0.04108 | 0.423303 | 0.543707098 |
| KHDC1L    | 6q13     | -0.04108 | 0.423402 | 0.543800122 |
| OR2T3     | 1q44     | -0.04107 | 0.423486 | 0.543872941 |
| CCL20     | 2q36.3   | -0.04106 | 0.423619 | 0.544008519 |
| SMTNL1    | 11q12.1  | -0.04103 | 0.423869 | 0.544295336 |
| CABP2     | 11q13.2  | -0.041   | 0.424226 | 0.544718886 |
| TMEFF2    | 2q32.3   | -0.04097 | 0.424564 | 0.545117464 |
| OSTN      | 3q28     | 0.040964 | 0.424666 | 0.545167479 |

|            |               |          |          |             |
|------------|---------------|----------|----------|-------------|
| SVOP       | 12q24.11      | -0.04096 | 0.424672 | 0.545167479 |
| HLTF       | 3q24          | 0.040961 | 0.4247   | 0.545167479 |
| ZER1       | 9q34.11       | 0.04096  | 0.424712 | 0.545167479 |
| RESP18     | 2q35          | 0.040932 | 0.425033 | 0.545545127 |
| PTTG1      | 5q33.3        | 0.040922 | 0.425143 | 0.545631325 |
| TMEM256    | 17p13.1       | 0.04092  | 0.425172 | 0.545631325 |
| CNOT7      | 8p22          | 0.040919 | 0.425182 | 0.545631325 |
| ITIH4      | 3p21.1        | 0.04091  | 0.425277 | 0.545718078 |
| LIMD1      | 3p21.31       | 0.040902 | 0.425377 | 0.545811678 |
| VRK1       | 14q32.2       | 0.040887 | 0.425541 | 0.545986349 |
| TCP11      | 6p21.31       | -0.04087 | 0.425707 | 0.546158379 |
| TMC2       | 20p13         | -0.04087 | 0.425729 | 0.546158379 |
| UTP3       | 4q13.3        | 0.040857 | 0.425885 | 0.546322649 |
| PLOD1      | 1p36.22       | -0.04085 | 0.425916 | 0.54632838  |
| GPR158-AS1 | 10p12.1       | -0.04084 | 0.42605  | 0.546464408 |
| MYH16      | 7q22.1        | -0.04084 | 0.426102 | 0.546496945 |
| ECHDC2     | 1p32.3        | 0.040829 | 0.426195 | 0.546580254 |
| ZBTB6      | 9q33.2        | -0.04083 | 0.426243 | 0.546607866 |
| CDC23      | 5q31.2        | 0.040792 | 0.426614 | 0.547048822 |
| TRIM77     | 11q14.3       | -0.04079 | 0.426664 | 0.547060204 |
| ESAM       | 11q24.2       | 0.040787 | 0.426678 | 0.547060204 |
| ADAM2      | 8p11.22       | 0.040768 | 0.426888 | 0.547294981 |
| IFI44      | 1p31.1        | 0.040761 | 0.426969 | 0.547358577 |
| PARD6A     | 16q22.1       | -0.04076 | 0.426996 | 0.547358577 |
| ARL3       | 10q24.32      | -0.04076 | 0.42702  | 0.547358577 |
| OR2L3      | 1q44          | 0.040751 | 0.427086 | 0.547407755 |
| CYBRD1     | 2q31.1        | -0.04075 | 0.42712  | 0.547416949 |
| SYCE3      | 22q13.33      | 0.040735 | 0.427264 | 0.547566062 |
| MTPAP      | 10p11.23      | 0.040733 | 0.427294 | 0.547569338 |
| RARG       | 12q13.13      | -0.04071 | 0.427519 | 0.547822561 |
| OR10H2     | 19p13.12      | -0.0407  | 0.427685 | 0.547979914 |
| ABCA9      | 17q24.2       | 0.040697 | 0.427696 | 0.547979914 |
| CACNG5     | 17q24.2       | 0.04069  | 0.42778  | 0.548051811 |
| GUCY2D     | 17p13.1       | 0.04066  | 0.428117 | 0.548448625 |
| ATF7       | 12q13.13      | 0.040654 | 0.428184 | 0.548499841 |
| PGAM2      | 7p13          | -0.04065 | 0.428219 | 0.548508623 |
| MRPS18B    | 6p21.33       | -0.04064 | 0.428314 | 0.548592131 |
| POLE       | 12q24.33      | 0.040641 | 0.428339 | 0.548592131 |
| DEF6       | 6p21.31       | -0.04063 | 0.428429 | 0.548673067 |
| CTDSP12    | 15q15.3-q21.1 | 0.040614 | 0.428647 | 0.548911195 |
| ARHGDIG    | 16p13.3       | 0.040612 | 0.42867  | 0.548911195 |
| APOBEC3D   | 22q13.1       | 0.040587 | 0.428951 | 0.549219568 |
| ZDHHC16    | 10q24.1       | -0.04059 | 0.428966 | 0.549219568 |
| SLC4A11    | 20p13         | 0.040579 | 0.429037 | 0.549275437 |
| GRIK1-AS1  | 21q21.3       | -0.04057 | 0.429145 | 0.549378668 |
| SLC4A9     | 5q31.3        | -0.04057 | 0.429185 | 0.549395324 |
| DGKK       | Xp11.22       | 0.040562 | 0.429239 | 0.549428909 |
| KIAA1549   | 7q34          | -0.04056 | 0.429288 | 0.549456539 |
| C6ORF132   | 6p21.1        | 0.040545 | 0.429421 | 0.549592461 |
| MDM4       | 1q32.1        | -0.04051 | 0.429779 | 0.550015535 |
| DTD2       | 14q12         | -0.04051 | 0.429868 | 0.550093436 |
| ADGRA1     | 10q26.3       | -0.04047 | 0.430268 | 0.5505699   |
| IL2RG      | Xq13.1        | -0.04047 | 0.430314 | 0.550594625 |
| METTL7B    | 12q13.2       | -0.04042 | 0.430855 | 0.551218638 |
| CT47A1     | Xq24          | -0.04042 | 0.430857 | 0.551218638 |
| TEX15      | 8p12          | -0.0404  | 0.431114 | 0.551511643 |
| CLEC2D     | 12p13.31      | 0.040383 | 0.43128  | 0.551688828 |
| PRKAB2     | 1q21.1        | 0.040369 | 0.431435 | 0.551840944 |

|             |                    |          |          |             |
|-------------|--------------------|----------|----------|-------------|
| RITA1       | 12q24.13           | 0.040367 | 0.431454 | 0.551840944 |
| ASB7        | 15q26.3            | 0.040365 | 0.431481 | 0.551840944 |
| SLC25A6     | Xp22.33 and Yp11.2 | -0.04036 | 0.431555 | 0.5518703   |
| CYP4Z2P     | 1p33               | -0.04036 | 0.431559 | 0.5518703   |
| EDDM3B      | 14q11.2            | -0.04035 | 0.431661 | 0.551964908 |
| ZBTB5       | 9p13.2             | -0.04032 | 0.431973 | 0.552328953 |
| MT1A        | 16q13              | -0.04032 | 0.43205  | 0.552391679 |
| CLEC4M      | 19p13.2            | 0.040308 | 0.432127 | 0.552455554 |
| KPRP        | 1q21.3             | -0.04028 | 0.432413 | 0.552785449 |
| BCKDK       | 16p11.2            | 0.040278 | 0.432473 | 0.552826567 |
| MTFR1       | 8q13.1             | -0.04027 | 0.432564 | 0.552907723 |
| TUBGCP4     | 15q15.3            | 0.040255 | 0.432741 | 0.553098373 |
| SYNGR2      | 17q25.3            | 0.040252 | 0.432768 | 0.553098373 |
| ZNF180      | 19q13.31           | 0.040241 | 0.432896 | 0.55322676  |
| KCNN3       | 1q21.3             | 0.040237 | 0.432943 | 0.55325127  |
| SLC25A35    | 17p13.1            | 0.040233 | 0.432985 | 0.553269484 |
| KLHDC8A     | 1q32.1             | -0.0402  | 0.433342 | 0.553690687 |
| POMT1       | 9q34.13            | 0.040192 | 0.433463 | 0.553809712 |
| LYVE1       | 11p15.4            | -0.04018 | 0.433542 | 0.553875168 |
| NPY         | 7p15.3             | -0.04017 | 0.433704 | 0.554046734 |
| ZNF560      | 19p13.2            | -0.04016 | 0.433843 | 0.554189377 |
| MDC1        | 6p21.33            | -0.04015 | 0.433924 | 0.554228385 |
| HTR1B       | 6q14.1             | 0.040151 | 0.433929 | 0.554228385 |
| FGF9        | 13q12.11           | -0.04013 | 0.434216 | 0.554559    |
| SLU7        | 5q33.3             | 0.040116 | 0.434329 | 0.554644406 |
| OR56A5      | 11p15.4            | 0.040115 | 0.434338 | 0.554644406 |
| TUBA1C      | 12q13.12           | -0.04006 | 0.434919 | 0.555350885 |
| CPLX1       | 4p16.3             | 0.040056 | 0.435013 | 0.555435324 |
| NBAS        | 2p24.3             | 0.040048 | 0.435112 | 0.555526075 |
| SLC39A12    | 10p12.33           | 0.040044 | 0.435159 | 0.555551583 |
| KBTBD7      | 13q14.11           | 0.04004  | 0.435206 | 0.555575107 |
| TMEM219     | 16p11.2            | 0.040023 | 0.435396 | 0.555782585 |
| PI4KB       | 1q21.3             | 0.04002  | 0.435435 | 0.555797606 |
| LINC02209   | 8p12               | 0.040014 | 0.435499 | 0.555831887 |
| PANX3       | 11q24.2            | -0.04001 | 0.435518 | 0.555831887 |
| TOPBP1      | 3q22.1             | -0.04001 | 0.435569 | 0.555861727 |
| OR1A2       | 17p13.3            | 0.039999 | 0.435668 | 0.555953223 |
| R3HCC1      | 8p21.3             | 0.039977 | 0.43592  | 0.556238912 |
| DCUN1D4     | 4q12               | 0.039972 | 0.435984 | 0.556285523 |
| FAM187B     | 19q13.12           | 0.039968 | 0.43603  | 0.556308767 |
| TREML5P     | 6p21.1             | -0.03996 | 0.436113 | 0.556379202 |
| SPEM1       | 17p13.1            | 0.039946 | 0.43628  | 0.556530208 |
| PCSK5       | 9q21.13            | 0.039945 | 0.436294 | 0.556530208 |
| OPRD1       | 1p35.3             | -0.03994 | 0.436315 | 0.556530208 |
| SNORD115-13 | 15q11.2            | -0.0399  | 0.436794 | 0.557105785 |
| PTCHD1      | Xp22.11            | 0.03989  | 0.436925 | 0.557237017 |
| KRTAP4-11   | 17q21.2            | -0.03989 | 0.436965 | 0.557253383 |
| MTA2        | 11q12.3            | 0.039879 | 0.437056 | 0.557308937 |
| C1ORF54     | 1q21.2             | -0.03988 | 0.437065 | 0.557308937 |
| TTC23       | 15q26.3            | 0.039851 | 0.437368 | 0.557660403 |
| EVL         | 14q32.2            | 0.03982  | 0.437733 | 0.558089443 |
| GLB1L2      | 11q25              | -0.03981 | 0.437792 | 0.558129771 |
| AGAP5       | 10q22.2            | 0.03981  | 0.437849 | 0.558166908 |
| TMEM98      | 17q11.2            | -0.03981 | 0.437879 | 0.558169339 |
| STAC        | 3p22.3-p22.2       | -0.03979 | 0.438039 | 0.558338222 |
| ZSWIM5      | 1p34.1             | -0.03979 | 0.438122 | 0.558397805 |
| USP47       | 11p15.3            | -0.03978 | 0.438142 | 0.558397805 |
| KRT28       | 17q21.2            | -0.03975 | 0.438514 | 0.558836571 |

|           |          |          |          |             |
|-----------|----------|----------|----------|-------------|
| HIST1H2BO | 6p22.1   | 0.039747 | 0.438571 | 0.558851723 |
| B3GAT1    | 11q25    | 0.039746 | 0.438582 | 0.558851723 |
| DHPS      | 19p13.13 | 0.039739 | 0.438658 | 0.55891328  |
| NKX6-2    | 10q26.3  | 0.039713 | 0.438968 | 0.559273456 |
| HIST1H4I  | 6p22.1   | -0.03971 | 0.43905  | 0.559341567 |
| NQO2      | 6p25.2   | 0.039702 | 0.439092 | 0.559360113 |
| MORF4L1   | 15q25.1  | 0.039686 | 0.439279 | 0.559561825 |
| DEDD      | 1q23.3   | -0.03965 | 0.439646 | 0.559994629 |
| TMEM225   | 11q24.1  | -0.03964 | 0.43986  | 0.560213901 |
| HIST1H4C  | 6p22.2   | -0.03963 | 0.439874 | 0.560213901 |
| C20ORF202 | 20p13    | 0.039626 | 0.439971 | 0.560300884 |
| NFIL3     | 9q22.31  | -0.03958 | 0.440532 | 0.560979504 |
| TACR3     | 4q24     | -0.0395  | 0.441388 | 0.562014428 |
| UBE2T     | 1q32.1   | 0.039502 | 0.4414   | 0.562014428 |
| SPATA3    | 2q37.1   | 0.039487 | 0.441569 | 0.562194014 |
| FAM27B    | 9q21.11  | 0.039481 | 0.441646 | 0.562255861 |
| PGK2      | 6p12.3   | 0.039468 | 0.441793 | 0.562406962 |
| INTS9     | 8p21.1   | 0.039445 | 0.442056 | 0.562705803 |
| SNORA46   | 16q21    | 0.039434 | 0.442192 | 0.562843014 |
| FNIP1     | 5q31.1   | -0.03943 | 0.44225  | 0.562861605 |
| OR4N4     | 15q11.2  | -0.03943 | 0.442262 | 0.562861605 |
| SMR3A     | 4q13.3   | 0.039387 | 0.442729 | 0.563419872 |
| IQCK      | 16p12.3  | 0.039375 | 0.442874 | 0.563551385 |
| RAB13     | 1q21.3   | 0.039374 | 0.442889 | 0.563551385 |
| UNC5CL    | 6p21.1   | -0.03936 | 0.443009 | 0.563634444 |
| VSIG8     | 1q23.2   | 0.039363 | 0.44301  | 0.563634444 |
| RNF130    | 5q35.3   | 0.039358 | 0.443074 | 0.563678967 |
| INHBA-AS1 | 7p14.1   | -0.03934 | 0.443298 | 0.563928107 |
| KIT       | 4q12     | 0.039335 | 0.443341 | 0.563933603 |
| PLPP6     | 9p24.1   | -0.03933 | 0.443358 | 0.563933603 |
| SYNJ2     | 6q25.3   | 0.03932  | 0.443513 | 0.564094729 |
| SLC41A1   | 1q32.1   | 0.039309 | 0.443635 | 0.564214571 |
| GPR21     | 9q33.2   | -0.03929 | 0.443872 | 0.564480046 |
| P2RY6     | 11q13.4  | -0.03928 | 0.444023 | 0.564635394 |
| TGOLN2    | 2p11.2   | -0.03925 | 0.444333 | 0.564993731 |
| SRGAP2    | 1q32.1   | -0.03924 | 0.44441  | 0.565053741 |
| POTEE     | 2q21.1   | -0.03924 | 0.444436 | 0.565053741 |
| YJU2      | 19p13.3  | -0.03923 | 0.444513 | 0.565114127 |
| HAGH      | 16p13.3  | -0.03923 | 0.44454  | 0.565114127 |
| WRAP73    | 1p36.32  | -0.03921 | 0.44473  | 0.565319902 |
| UBQLN2    | Xp11.21  | -0.03921 | 0.444793 | 0.565363519 |
| MROH6     | 8q24.3   | -0.0392  | 0.444903 | 0.565467558 |
| GLRX2     | 1q31.2   | 0.039193 | 0.444981 | 0.565530258 |
| SMR3B     | 4q13.3   | -0.03919 | 0.44501  | 0.565532039 |
| MIGA2     | 9q34.11  | 0.039184 | 0.445086 | 0.565592056 |
| ICAM1     | 19p13.2  | 0.03918  | 0.445141 | 0.565626136 |
| FASN      | 17q25.3  | -0.03918 | 0.445173 | 0.565631594 |
| STARD8    | Xq13.1   | 0.039165 | 0.445313 | 0.565750643 |
| EMSY      | 11q13.5  | 0.039164 | 0.445323 | 0.565750643 |
| PPRC1     | 10q24.32 | -0.03915 | 0.445529 | 0.565975575 |
| SLC51A    | 3q29     | 0.039141 | 0.445584 | 0.56600966  |
| PRAMEF14  | 1p36.21  | -0.03914 | 0.445638 | 0.566042133 |
| SH3GL3    | 15q25.2  | -0.03913 | 0.445702 | 0.566087402 |
| MYO16     | 13q33.3  | -0.03913 | 0.44573  | 0.566087788 |
| PELP1     | 17p13.2  | 0.039105 | 0.446007 | 0.566383712 |
| TSC22D4   | 7q22.1   | -0.0391  | 0.44602  | 0.566383712 |
| CEP170    | 1q43     | -0.03909 | 0.446239 | 0.566626209 |
| CHCHD4    | 3p25.1   | 0.039063 | 0.446493 | 0.566913381 |

|           |          |          |          |             |
|-----------|----------|----------|----------|-------------|
| ATP1A4    | 1q23.2   | -0.03904 | 0.446708 | 0.567149791 |
| NYX       | Xp11.4   | -0.03904 | 0.446779 | 0.567203478 |
| WDR18     | 19p13.3  | 0.03902  | 0.447    | 0.567448712 |
| ANKRD66   | 6p12.3   | 0.039011 | 0.447101 | 0.567540627 |
| CAVIN2    | 2q32.3   | -0.039   | 0.447241 | 0.567682537 |
| IRX2      | 5p15.33  | 0.038981 | 0.447448 | 0.567909889 |
| ZNF765    | 19q13.42 | 0.038976 | 0.447512 | 0.56795463  |
| GPAT4     | 8p11.21  | -0.03896 | 0.447648 | 0.568090695 |
| RACGAP1   | 12q13.12 | 0.03891  | 0.448278 | 0.568854769 |
| NEUROD4   | 12q13.2  | 0.038907 | 0.448312 | 0.568862124 |
| NUP153    | 6p22.3   | -0.0389  | 0.448354 | 0.568878346 |
| INTS3     | 1q21.3   | -0.0389  | 0.448454 | 0.568969855 |
| DUSP8     | 11p15.5  | -0.03888 | 0.448582 | 0.569084852 |
| C5ORF56   | 5q31.1   | 0.038881 | 0.448615 | 0.569084852 |
| OR9G4     | 11q12.1  | 0.03888  | 0.448636 | 0.569084852 |
| USP9Y     | Yq11.221 | -0.03888 | 0.448663 | 0.569084852 |
| KNCN      | 1p33     | -0.03888 | 0.448687 | 0.569084852 |
| JUND      | 19p13.11 | 0.038867 | 0.448781 | 0.569168153 |
| TSHZ1     | 18q22.3  | -0.03886 | 0.448861 | 0.569234158 |
| HEATR9    | 17q12    | 0.038835 | 0.449162 | 0.569579384 |
| HSPG2     | 1p36.12  | -0.03882 | 0.449337 | 0.569744805 |
| SULT2B1   | 19q13.33 | -0.03882 | 0.449349 | 0.569744805 |
| AQP4-AS1  | 18q11.2  | 0.038816 | 0.449378 | 0.569745364 |
| FFAR3     | 19q13.12 | -0.03881 | 0.449439 | 0.569785787 |
| OR52E8    | 11p15.4  | -0.03879 | 0.449649 | 0.569979933 |
| KRTAP19-1 | 21q22.11 | -0.03879 | 0.449649 | 0.569979933 |
| VTN       | 17q11.2  | 0.038753 | 0.450112 | 0.570530747 |
| BRINP1    | 9q33.1   | -0.03875 | 0.450175 | 0.570574804 |
| SEC23B    | 20p11.23 | 0.038738 | 0.450294 | 0.570689028 |
| NXPH4     | 12q13.3  | 0.038706 | 0.450669 | 0.571128669 |
| TRIM56    | 7q22.1   | 0.038665 | 0.451148 | 0.571699624 |
| OR4C12    | 11p11.12 | -0.03863 | 0.45159  | 0.572223445 |
| TMEM80    | 11p15.5  | 0.038584 | 0.452099 | 0.572832687 |
| OR1F2P    | 16p13.3  | -0.03855 | 0.452468 | 0.573263269 |
| FAM81B    | 5q15     | -0.03855 | 0.452501 | 0.573268636 |
| GAS2L1P2  | 9q22.33  | 0.038541 | 0.452595 | 0.573351348 |
| DGKE      | 17q22    | 0.038529 | 0.452746 | 0.573506888 |
| UPB1      | 22q11.23 | -0.0385  | 0.453038 | 0.57384107  |
| MRFAP1L1  | 4p16.1   | -0.03849 | 0.453161 | 0.573951905 |
| EEF1E1    | 6p24.3   | -0.03849 | 0.453183 | 0.573951905 |
| CETP      | 16q13    | 0.038483 | 0.453282 | 0.574040494 |
| CDK14     | 7q21.13  | -0.03846 | 0.453542 | 0.574333407 |
| GAGE10    | Xp11.23  | -0.03845 | 0.453623 | 0.574399231 |
| PLIN1     | 15q26.1  | -0.03843 | 0.453881 | 0.574684783 |
| MYRIP     | 3p22.1   | -0.03843 | 0.453905 | 0.574684783 |
| REST      | 4q12     | 0.038392 | 0.45435  | 0.575210906 |
| PDHB      | 3p14.3   | -0.03839 | 0.454393 | 0.575229038 |
| TOP2A     | 17q21.2  | -0.03838 | 0.454459 | 0.575276021 |
| GNAT2     | 1p13.3   | -0.03835 | 0.454795 | 0.575641617 |
| GML       | 8q24.3   | -0.03835 | 0.454805 | 0.575641617 |
| HIST1H1E  | 6p22.2   | -0.03834 | 0.455009 | 0.575858354 |
| NUP88     | 17p13.2  | -0.03833 | 0.455034 | 0.575858354 |
| HDAC3     | 5q31.3   | -0.03831 | 0.45531  | 0.576171572 |
| ANKUB1    | 3q25.1   | -0.0383  | 0.455454 | 0.576303668 |
| IRX3      | 16q12.2  | 0.038297 | 0.455472 | 0.576303668 |
| MINAR1    | 15q25.1  | 0.038286 | 0.455599 | 0.576428074 |
| RALYL     | 8q21.2   | -0.03827 | 0.455804 | 0.576642665 |
| TTY13     | Yq11.223 | 0.038267 | 0.455826 | 0.576642665 |

|              |                      |          |          |             |
|--------------|----------------------|----------|----------|-------------|
| ZBTB22       | 6p21.32              | 0.038249 | 0.456035 | 0.576870747 |
| GSPT1        | 16p13.13             | 0.03824  | 0.456142 | 0.576969115 |
| ARHGAP27P2   | 17q24.2              | 0.038226 | 0.4563   | 0.577133317 |
| NEFM         | 8p21.2               | -0.03821 | 0.456436 | 0.577267724 |
| KCNV2        | 9p24.2               | -0.03821 | 0.456465 | 0.577268449 |
| CABP7        | 22q12.2              | -0.03819 | 0.456703 | 0.577532819 |
| SGTA         | 19p13.3              | -0.03818 | 0.456797 | 0.57758398  |
| ALG1L        | 3q21.2               | -0.03818 | 0.456827 | 0.57758398  |
| PAK4         | 19q13.2              | 0.038182 | 0.45683  | 0.57758398  |
| NRL          | 14q11.2-q12          | -0.03815 | 0.45716  | 0.577964988 |
| GCKR         | 2p23.3               | 0.038138 | 0.457345 | 0.578162414 |
| MTSS2        | 16q22.1              | -0.03813 | 0.457475 | 0.578290394 |
| DNAJB9       | 7q31.1 14q24.2-q24.3 | -0.0381  | 0.457823 | 0.578694145 |
| AADAT        | 4q33                 | -0.03809 | 0.457856 | 0.578699405 |
| PYGO2        | 1q21.3               | -0.03809 | 0.45789  | 0.578704667 |
| STRN         | 2p22.2               | 0.038086 | 0.457958 | 0.578754925 |
| PDHX         | 11p13                | 0.038075 | 0.458093 | 0.578875044 |
| C1QTNF9      | 13q12.12             | -0.03807 | 0.458111 | 0.578875044 |
| CYP46A1      | 14q32.2              | -0.03807 | 0.458185 | 0.578931615 |
| CNOT2        | 12q15                | 0.038058 | 0.458294 | 0.579022306 |
| ACTR3        | 2q14.1               | -0.03806 | 0.458314 | 0.579022306 |
| KDM6A        | Xp11.3               | 0.038045 | 0.458442 | 0.579146508 |
| TGFA         | 2p13.3               | 0.038028 | 0.458638 | 0.579357531 |
| CUL5         | 11q22.3              | -0.03802 | 0.458699 | 0.579376519 |
| UBA52        | 19p13.11             | -0.03802 | 0.458716 | 0.579376519 |
| ATP6V0A1     | 17q21.2              | 0.03802  | 0.458739 | 0.579376519 |
| TMEM207      | 3q28                 | 0.038008 | 0.458885 | 0.579512013 |
| DSG3         | 18q12.1              | 0.038005 | 0.458912 | 0.579512013 |
| CCDC13       | 3p22.1               | 0.038002 | 0.458949 | 0.579512013 |
| ZNF266       | 19p13.2              | -0.038   | 0.458981 | 0.579512013 |
| DRD4         | 11p15.5              | -0.038   | 0.458991 | 0.579512013 |
| LOC389705    | 9p22.3               | -0.03799 | 0.459107 | 0.579621877 |
| ELF2         | 4q31.1               | -0.03798 | 0.459166 | 0.579659275 |
| TYROBP       | 19q13.12             | 0.037946 | 0.459613 | 0.58015113  |
| HHIP         | 4q31.21              | -0.03794 | 0.459631 | 0.58015113  |
| KRTAP5-4     | 11p15.5              | 0.037944 | 0.459642 | 0.58015113  |
| PDCL2        | 4q12                 | 0.037927 | 0.459841 | 0.580365715 |
| ZSCAN5B      | 19q13.43             | -0.03792 | 0.459921 | 0.580367197 |
| MCOLN3       | 1p22.3               | 0.03792  | 0.459927 | 0.580367197 |
| CADM2        | 3p12.1               | -0.03792 | 0.459929 | 0.580367197 |
| JAM2         | 21q21.3              | -0.03791 | 0.460092 | 0.580535969 |
| EPS15L1      | 19p13.11             | 0.037869 | 0.460523 | 0.58104327  |
| IFNA17       | 9p21.3               | 0.037864 | 0.460587 | 0.58108753  |
| NDST1        | 5q33.1               | 0.037861 | 0.460625 | 0.581098814 |
| RCAN3        | 1p36.11              | 0.037844 | 0.460821 | 0.581308436 |
| RNF5P1       | 8p11.22              | -0.03783 | 0.460955 | 0.581440875 |
| TIMP4        | 3p25.2               | 0.037823 | 0.461068 | 0.581547504 |
| ZDHHC11      | 5p15.33              | 0.037804 | 0.4613   | 0.581803859 |
| DEFB131A     | 4p16.1               | -0.03779 | 0.461417 | 0.581906198 |
| NRM          | 6p21.33              | -0.03779 | 0.46144  | 0.581906198 |
| LILRA1       | 19q13.42             | 0.037782 | 0.461552 | 0.582010899 |
| TFAP2B       | 6p12.3               | -0.03778 | 0.46159  | 0.582021936 |
| GMCL2        | 5q35.3               | 0.037767 | 0.461731 | 0.582131574 |
| LOC100128076 | 9q22.31              | -0.03777 | 0.461735 | 0.582131574 |
| CSNK2A3      | 11p15.4              | -0.03776 | 0.461843 | 0.582195249 |
| MMEL1        | 1p36.32              | 0.037758 | 0.461843 | 0.582195249 |
| KIR3DP1      | 19q13.42             | -0.03775 | 0.461921 | 0.58225595  |
| RNF135       | 17q11.2              | 0.037746 | 0.461986 | 0.582294687 |

|              |              |          |          |             |
|--------------|--------------|----------|----------|-------------|
| SNX1         | 15q22.31     | 0.037744 | 0.462009 | 0.582294687 |
| SF3B4        | 1q21.2       | -0.03774 | 0.462048 | 0.58230636  |
| XRCC4        | 5q14.2       | -0.03773 | 0.462141 | 0.582387258 |
| IK           | 5q31.3       | 0.037702 | 0.462511 | 0.582816195 |
| DUSP3        | 17q21.31     | -0.03769 | 0.462592 | 0.582882645 |
| ADAM21P1     | 14q24.2      | 0.037683 | 0.462732 | 0.582986033 |
| CYTL1        | 4p16.2       | 0.037683 | 0.462733 | 0.582986033 |
| LOC100130449 | 2q37.3       | 0.037675 | 0.462833 | 0.583075293 |
| SRCAP        | 16p11.2      | -0.03766 | 0.462991 | 0.583206642 |
| PDCD11       | 10q24.33     | -0.03766 | 0.463017 | 0.583206642 |
| OTUD7A       | 15q13.3      | 0.037658 | 0.463024 | 0.583206642 |
| OPALIN       | 10q24.1      | -0.03764 | 0.463258 | 0.583464866 |
| CYBA         | 16q24.2      | 0.037612 | 0.463575 | 0.583827004 |
| MICALL1      | 22q13.1      | -0.03758 | 0.463904 | 0.584176066 |
| TRIM34       | 11p15.4      | -0.03758 | 0.463911 | 0.584176066 |
| SMN1         | 5q13.2       | -0.03756 | 0.46416  | 0.584452868 |
| LGR6         | 1q32.1       | -0.03756 | 0.464195 | 0.58446068  |
| POC5         | 5q13.3       | -0.03755 | 0.464305 | 0.584562673 |
| OR51I2       | 11p15.4      | 0.037538 | 0.464458 | 0.584718825 |
| GRIK1        | 21q21.3      | 0.037524 | 0.464625 | 0.58489193  |
| POLA2        | 11q13.1      | -0.03751 | 0.464777 | 0.585046198 |
| KLF12        | 13q22.1      | -0.03751 | 0.464833 | 0.585080438 |
| ELL          | 19p13.11     | -0.03749 | 0.465005 | 0.585259941 |
| OR6C2        | 12q13.2      | -0.03749 | 0.465053 | 0.585276773 |
| TGIF1        | 18p11.31     | 0.037486 | 0.465077 | 0.585276773 |
| WNK3         | Xp11.22      | -0.03747 | 0.465214 | 0.585412342 |
| CINP         | 14q32.31     | -0.03746 | 0.465364 | 0.585564797 |
| SEMA3G       | 3p21.1       | -0.03745 | 0.465454 | 0.585610684 |
| NCAPD2       | 12p13.31     | 0.037454 | 0.465459 | 0.585610684 |
| ATP1A1-AS1   | 1p13.1       | 0.037447 | 0.465539 | 0.585673989 |
| CCNC         | 6q16.2       | -0.03744 | 0.465605 | 0.585716649 |
| ZNF622       | 5p15.1       | -0.03744 | 0.465631 | 0.585716649 |
| OR10G2       | 14q11.2      | 0.037415 | 0.46592  | 0.585984326 |
| MRPL34       | 19p13.11     | 0.037415 | 0.465926 | 0.585984326 |
| PCDH20       | 13q21.2      | -0.03741 | 0.465954 | 0.585984326 |
| CCDC144A     | 17p11.2      | 0.037412 | 0.465961 | 0.585984326 |
| KCNK18       | 10q25.3      | -0.0374  | 0.466112 | 0.58613727  |
| DNAJC5G      | 2p23.3       | -0.03739 | 0.466242 | 0.586263611 |
| DAZ2         | Yq11.223     | -0.03738 | 0.466283 | 0.58627894  |
| ZNF264       | 19q13.43     | 0.03738  | 0.466345 | 0.586320039 |
| FAM74A3      | 9q21.11      | 0.037354 | 0.466652 | 0.586669379 |
| BOK          | 2q37.3       | 0.037341 | 0.46681  | 0.586799129 |
| RNF213       | 17q25.3      | 0.03734  | 0.466814 | 0.586799129 |
| TRIM75P      | 4q32.3       | -0.03732 | 0.467054 | 0.587051463 |
| ARHGEF35     | 7q35         | 0.037318 | 0.46708  | 0.587051463 |
| CT47B1       | Xq24         | -0.03732 | 0.467103 | 0.587051463 |
| PCDHB10      | 5q31.3       | -0.03729 | 0.467384 | 0.587367575 |
| ADAM8        | 10q26.3      | 0.037282 | 0.467512 | 0.587491776 |
| CCDC197      | 14q32.12     | 0.037279 | 0.467541 | 0.587491776 |
| CDKN2D       | 19p13.2      | 0.037276 | 0.467587 | 0.587512435 |
| OR8A1        | 11q24.2      | 0.037272 | 0.467627 | 0.587525481 |
| LONP1        | 19p13.3      | 0.037218 | 0.468282 | 0.588311801 |
| NAV1         | 1q32.1       | -0.0372  | 0.468439 | 0.588472236 |
| GPR85        | 7q31.1       | -0.03718 | 0.468687 | 0.588747501 |
| CLVS1        | 8q12.2-q12.3 | -0.03718 | 0.468721 | 0.588753115 |
| HOMER1       | 5q14.1       | -0.03716 | 0.468926 | 0.588973056 |
| CCDC178      | 18q12.1      | 0.037155 | 0.469032 | 0.589027311 |
| DEPDC1B      | 5q12.1       | 0.037153 | 0.469049 | 0.589027311 |



|              |          |          |          |             |
|--------------|----------|----------|----------|-------------|
| CAPRIN1      | 11p13    | -0.03715 | 0.469057 | 0.589027311 |
| SLFNL1       | 1p34.2   | -0.03715 | 0.469097 | 0.589040211 |
| CYB5RL       | 1p32.3   | 0.037143 | 0.469173 | 0.589099084 |
| PPIB         | 15q22.31 | -0.03712 | 0.469444 | 0.589402019 |
| VSIG4        | Xq12     | 0.037113 | 0.469532 | 0.589475138 |
| AHI1         | 6q23.3   | 0.037108 | 0.469593 | 0.589515885 |
| UBQLNL       | 11p15.4  | 0.037103 | 0.469651 | 0.589551061 |
| GTSF1        | 12q13.13 | 0.037081 | 0.469917 | 0.5898324   |
| CAPG         | 2p11.2   | 0.03708  | 0.469934 | 0.5898324   |
| LOC100240735 | 12q13.13 | -0.03707 | 0.470049 | 0.589940063 |
| ZNF143       | 11p15.4  | -0.03706 | 0.470202 | 0.590095259 |
| PTPRM        | 18p11.23 | -0.03705 | 0.470305 | 0.590157333 |
| UGP2         | 2p15     | 0.037048 | 0.470311 | 0.590157333 |
| CLDN4        | 7q11.23  | -0.03703 | 0.470571 | 0.590447506 |
| MRPL16       | 11q12.1  | -0.03701 | 0.470824 | 0.590728021 |
| TTC37        | 5q15     | 0.036998 | 0.470917 | 0.590773526 |
| H1FOO        | 3q22.1   | 0.036997 | 0.47092  | 0.590773526 |
| S100Z        | 5q13.3   | 0.036987 | 0.471045 | 0.590893456 |
| RAB40C       | 16p13.3  | -0.03698 | 0.471106 | 0.59090188  |
| SNORA20      | 6q25.3   | 0.036981 | 0.471111 | 0.59090188  |
| OR1F1        | 16p13.3  | -0.03698 | 0.471151 | 0.590915966 |
| HSPA12B      | 20p13    | -0.03697 | 0.471209 | 0.590951782 |
| TMEM244      | 6q22.33  | -0.03696 | 0.471397 | 0.591150067 |
| G3BP1        | 5q33.1   | 0.036951 | 0.471481 | 0.591218029 |
| ZNF222       | 19q13.31 | 0.036944 | 0.471556 | 0.59127497  |
| BCL2L2       | 14q11.2  | 0.036932 | 0.471708 | 0.591429211 |
| SNORA9       | 7p13     | -0.03692 | 0.47185  | 0.591569426 |
| DPCD         | 10q24.32 | 0.036913 | 0.47193  | 0.591633932 |
| UBAP2L       | 1q21.3   | -0.03689 | 0.472158 | 0.591882204 |
| EDDM3A       | 14q11.2  | 0.036881 | 0.472313 | 0.592039341 |
| NDUFA5       | 7q31.32  | 0.036876 | 0.472375 | 0.592047977 |
| MMP8         | 11q22.2  | -0.03688 | 0.472379 | 0.592047977 |
| RPAIN        | 17p13.2  | -0.03687 | 0.472502 | 0.592165283 |
| RBPJL        | 20q13.12 | -0.03684 | 0.472783 | 0.592480266 |
| UBE2Q2       | 15q24.2  | 0.036827 | 0.472971 | 0.59265924  |
| AADA2L2      | 3q25.1   | 0.036823 | 0.473013 | 0.59265924  |
| AP4E1        | 15q21.2  | 0.036823 | 0.473015 | 0.59265924  |
| ATP8B3       | 19p13.3  | 0.036789 | 0.473421 | 0.593094478 |
| A1BG         | 19q13.43 | -0.03679 | 0.473421 | 0.593094478 |
| PHLDA1       | 12q21.2  | -0.03677 | 0.473647 | 0.593301218 |
| OR5L1        | 11q12.1  | -0.03677 | 0.473671 | 0.593301218 |
| SP100        | 2q37.1   | 0.036768 | 0.473675 | 0.593301218 |
| CFAP69       | 7q21.13  | -0.03674 | 0.473997 | 0.593666617 |
| CLPP         | 19p13.3  | 0.036731 | 0.474118 | 0.593782083 |
| IZUMO1       | 19q13.33 | -0.03672 | 0.474251 | 0.593910421 |
| KCNQ2        | 20q13.33 | -0.03671 | 0.474419 | 0.594084709 |
| B3GNT2       | 2p15     | 0.036696 | 0.474544 | 0.594203222 |
| LAMC3        | 9q34.12  | -0.03669 | 0.474627 | 0.594270002 |
| HSP90AB4P    | 15q21.3  | 0.036671 | 0.474844 | 0.594484609 |
| TMC1         | 9q21.13  | 0.03667  | 0.474857 | 0.594484609 |
| AP5B1        | 11q13.1  | 0.036663 | 0.474938 | 0.594548312 |
| SLC16A5      | 17q25.1  | 0.036654 | 0.475043 | 0.594642685 |
| UBE2B        | 5q31.1   | -0.03665 | 0.475076 | 0.594646156 |
| CACNB1       | 17q12    | -0.03663 | 0.475361 | 0.594966376 |
| SLC35A5      | 3q13.2   | 0.036608 | 0.475606 | 0.59521734  |
| SLC22A6      | 11q12.3  | -0.0366  | 0.475665 | 0.59521734  |
| UBE2H        | 7q32.2   | 0.036603 | 0.475665 | 0.59521734  |
| KANSL1L      | 2q34     | 0.036602 | 0.475681 | 0.59521734  |

|            |              |          |          |             |
|------------|--------------|----------|----------|-------------|
| KLRC3      | 12p13.2      | 0.036597 | 0.475739 | 0.595253052 |
| AMER2      | 13q12.13     | -0.03659 | 0.475862 | 0.59536972  |
| PDIA2      | 16p13.3      | -0.03658 | 0.475938 | 0.595406572 |
| RPS26      | 12q13.2      | -0.03658 | 0.475951 | 0.595406572 |
| C16ORF72   | 16p13.2      | 0.036569 | 0.476075 | 0.595525386 |
| TRDMT1     | 10p13        | -0.03654 | 0.476389 | 0.595879869 |
| TMEM38B    | 9q31.2       | -0.03654 | 0.476478 | 0.595954852 |
| KNTC1      | 12q24.31     | -0.03653 | 0.476535 | 0.595989164 |
| FAM86HP    | 3q22.1       | -0.03652 | 0.476616 | 0.59605271  |
| GAS7       | 17p13.1      | -0.0365  | 0.476847 | 0.596304926 |
| RABL2B     | 22q13.33     | -0.0365  | 0.476902 | 0.596327334 |
| CCDC140    | 2q36.1       | 0.036499 | 0.476925 | 0.596327334 |
| ASB15      | 7q31.32      | -0.03648 | 0.477101 | 0.596510873 |
| EPS8L2     | 11p15.5      | -0.03648 | 0.477165 | 0.596552764 |
| EGR1       | 5q31.2       | 0.036465 | 0.477326 | 0.596717189 |
| SBDS       | 7q11.21      | 0.036422 | 0.477854 | 0.597340447 |
| TAS2R38    | 7q34         | 0.036416 | 0.477924 | 0.597348873 |
| LRRC47     | 1p36.32      | -0.03641 | 0.477948 | 0.597348873 |
| WNT7B      | 22q13.31     | 0.036414 | 0.477951 | 0.597348873 |
| GNRH1      | 8p21.2       | -0.0364  | 0.478058 | 0.597445147 |
| ARHGAP17   | 16p12.1      | -0.0364  | 0.478115 | 0.597479497 |
| CDH4       | 20q13.33     | -0.03638 | 0.478367 | 0.597757081 |
| C15ORF32   | 15q26.1      | 0.03637  | 0.478479 | 0.597860498 |
| GPSM3      | 6p21.32      | 0.036359 | 0.47861  | 0.597981365 |
| ADI1       | 2p25.3       | 0.036357 | 0.478636 | 0.597981365 |
| SFTA3      | 14q13.3      | -0.03635 | 0.478738 | 0.598071656 |
| DNAJB8     | 3q21.3       | -0.03635 | 0.478768 | 0.598072112 |
| THAP7      | 22q11.21     | -0.03634 | 0.478881 | 0.598175501 |
| SLC30A1    | 1q32.3       | 0.036333 | 0.47893  | 0.598200057 |
| SPP1       | 4q22.1       | 0.036311 | 0.479199 | 0.598498153 |
| MDH1       | 2p15         | 0.036296 | 0.479376 | 0.598682304 |
| KCNK12     | 2p16.3       | -0.03628 | 0.479593 | 0.598903277 |
| RYR1       | 19q13.2      | -0.03627 | 0.479655 | 0.598903277 |
| MST1L      | 1p36.13      | -0.03627 | 0.479676 | 0.598903277 |
| DHX9       | 1q25.3       | -0.03627 | 0.479682 | 0.598903277 |
| USP17L9P   | 4p16.1       | -0.03627 | 0.479703 | 0.598903277 |
| HNRNPU-AS1 | -            | -0.03626 | 0.479833 | 0.599028344 |
| ALDH18A1   | 10q24.1      | 0.036246 | 0.479982 | 0.5991767   |
| HAMP       | 19q13.12     | -0.03624 | 0.480077 | 0.599201748 |
| SSPO       | 7q36.1       | -0.03624 | 0.480089 | 0.599201748 |
| CDYL2      | 16q23.2      | -0.03623 | 0.480138 | 0.599201748 |
| VN1R5      | 1q44         | -0.03623 | 0.480142 | 0.599201748 |
| SLC25A51   | 9p13.2-p13.1 | 0.036232 | 0.480151 | 0.599201748 |
| TAAR2      | 6q23.2       | -0.03623 | 0.480225 | 0.599256765 |
| PATE2      | 11q24.2      | 0.0362   | 0.480535 | 0.599605741 |
| OR51F2     | 11p15.4      | 0.036186 | 0.480706 | 0.599722042 |
| ESX1       | Xq22.2       | 0.036185 | 0.480717 | 0.599722042 |
| CCDC91     | 12p11.22     | 0.036185 | 0.480718 | 0.599722042 |
| CZIB       | 1p32.3       | -0.03617 | 0.480872 | 0.599876958 |
| CETN4P     | 4q27         | 0.036168 | 0.480932 | 0.599913037 |
| HYLS1      | 11q24.2      | -0.03617 | 0.480961 | 0.599913037 |
| LMO7       | 13q22.2      | -0.03616 | 0.481058 | 0.59999626  |
| COX18      | 4q13.3       | 0.036142 | 0.481241 | 0.600187049 |
| ATAD5      | 17q11.2      | -0.03607 | 0.482093 | 0.601212774 |
| CCDC85A    | 2p16.1       | -0.03607 | 0.482148 | 0.601232515 |
| HES4       | 1p36.33      | -0.03607 | 0.482169 | 0.601232515 |
| COLGALT1   | 19p13.11     | -0.03605 | 0.482352 | 0.601423466 |
| DEFB132    | 20p13        | 0.036047 | 0.482395 | 0.601439339 |

|              |                |          |          |             |
|--------------|----------------|----------|----------|-------------|
| FCGR1B       | 1p11.2         | -0.03603 | 0.48259  | 0.601645518 |
| RAB6B        | 3q22.1         | 0.036021 | 0.482713 | 0.601733478 |
| OR2D2        | 11p15.4        | 0.03602  | 0.482721 | 0.601733478 |
| OR7A5        | 19p13.12       | -0.03602 | 0.482753 | 0.601735979 |
| SNX33        | 15q24.2        | -0.036   | 0.482949 | 0.601942808 |
| FAM72B       | 1p11.2         | 0.035994 | 0.483047 | 0.601991913 |
| HPF1         | 4q33           | 0.035993 | 0.483048 | 0.601991913 |
| IQCJ         | 3q25.32        | -0.03599 | 0.483144 | 0.602041019 |
| GLE1         | 9q34.11        | 0.035985 | 0.483148 | 0.602041019 |
| DNAH10       | 12q24.31       | -0.03597 | 0.483364 | 0.602272814 |
| GFRA4        | 20p13          | -0.03596 | 0.483466 | 0.602361925 |
| CFHR2        | 1q31.3         | 0.035941 | 0.483691 | 0.602604807 |
| GPATCH11     | 2p22.2         | -0.03591 | 0.484052 | 0.602989818 |
| PPP1R12A     | 12q21.2-q21.31 | 0.03591  | 0.48406  | 0.602989818 |
| AKR1C3       | 10p15.1        | 0.035896 | 0.484241 | 0.603177686 |
| LOC100130331 | 1q43           | 0.035868 | 0.484574 | 0.603533883 |
| RSRC2        | 12q24.31       | -0.03587 | 0.484587 | 0.603533883 |
| GAGE2A       | Xp11.23        | -0.03586 | 0.484659 | 0.603586443 |
| FSCN2        | 17q25.3        | 0.035858 | 0.484694 | 0.603592402 |
| FRRS1L       | 9q31.3         | -0.03585 | 0.484745 | 0.603617414 |
| FCHO1        | 19p13.11       | -0.03585 | 0.484813 | 0.603664753 |
| AOX2P        | 2q33.1         | 0.035836 | 0.48497  | 0.603823689 |
| CRTC3        | 15q26.1        | 0.035828 | 0.485062 | 0.603900111 |
| LINC00159    | 21q22.11       | 0.035821 | 0.485147 | 0.603923153 |
| SSX4         | Xp11.23        | -0.03582 | 0.485169 | 0.603923153 |
| ASTE1        | 3q22.1         | 0.035817 | 0.485201 | 0.603923153 |
| HIST1H2BK    | 6p22.1         | 0.035817 | 0.485201 | 0.603923153 |
| LOC730101    | 6p12.2         | -0.03581 | 0.485277 | 0.603980381 |
| UBR3         | 2q31.1         | 0.035804 | 0.485359 | 0.604044145 |
| PTPN20       | 10q11.22       | -0.0358  | 0.485423 | 0.604087179 |
| FAM238A      | 10p12.1        | -0.03576 | 0.485863 | 0.604596589 |
| C15ORF39     | 15q24.2        | -0.03576 | 0.485952 | 0.604639158 |
| POMZP3       | 7q11.23        | -0.03575 | 0.485958 | 0.604639158 |
| KIF4B        | 5q33.2         | -0.03575 | 0.486031 | 0.604693131 |
| HNRNPCL3     | 1p36.21        | -0.03573 | 0.48626  | 0.60491426  |
| CEACAM18     | 19q13.41       | 0.035729 | 0.486269 | 0.60491426  |
| PRDX3        | 10q26.11       | 0.03568  | 0.486867 | 0.605594238 |
| CLEC4D       | 12p13.31       | 0.03568  | 0.486876 | 0.605594238 |
| ASAP1-IT1    | 8q24.21        | -0.03566 | 0.48717  | 0.605919759 |
| PDGFRL       | 8p22           | 0.035653 | 0.487199 | 0.605919759 |
| TMEM45A      | 3q12.2         | 0.035642 | 0.487341 | 0.605996138 |
| MEX3B        | 15q25.2        | -0.03564 | 0.487364 | 0.605996138 |
| ZNF121       | 19p13.2        | 0.035639 | 0.487375 | 0.605996138 |
| GPR141       | 7p14.1         | 0.035638 | 0.487381 | 0.605996138 |
| LOC441601    | 11p11.12       | -0.03563 | 0.48745  | 0.606043953 |
| QRFPR        | 4q27           | 0.035601 | 0.487831 | 0.606447025 |
| GDF1         | 19p13.11       | -0.0356  | 0.487835 | 0.606447025 |
| C6ORF62      | 6p22.3         | -0.03559 | 0.488015 | 0.606633234 |
| METTL21C     | 13q33.1        | 0.035571 | 0.488201 | 0.606826862 |
| SLC12A5      | 20q13.12       | -0.03557 | 0.488272 | 0.606877984 |
| SIRPB2       | 20p13          | 0.035556 | 0.488386 | 0.606981817 |
| SCARNA18     | 5q14.2         | -0.03554 | 0.488572 | 0.607175502 |
| MIS18BP1     | 14q21.2        | 0.035522 | 0.488797 | 0.607398783 |
| GDNF         | 5p13.2         | -0.03552 | 0.48882  | 0.607398783 |
| SELENOV      | 19q13.2        | -0.03552 | 0.488863 | 0.607398783 |
| OR52N4       | 11p15.4        | -0.03552 | 0.488873 | 0.607398783 |
| TAS2R8       | 12p13.2        | 0.035507 | 0.488991 | 0.607507249 |
| ALG9         | 11q23.1        | -0.03548 | 0.489377 | 0.607949581 |

|           |          |          |          |             |
|-----------|----------|----------|----------|-------------|
| MMS22L    | 6q16.1   | 0.035458 | 0.489588 | 0.608174    |
| BCDIN3D   | 12q13.12 | -0.03542 | 0.490082 | 0.608749203 |
| RBM15     | 1p13.3   | 0.035376 | 0.490594 | 0.609330699 |
| PAGE5     | Xp11.21  | 0.035374 | 0.490611 | 0.609330699 |
| LRRC57    | 15q15.2  | -0.03535 | 0.490934 | 0.609695222 |
| MIP       | 12q13.3  | -0.03534 | 0.491021 | 0.609764522 |
| NLRC4     | 2p22.3   | 0.035337 | 0.491072 | 0.609790218 |
| CLEC1A    | 12p13.2  | -0.03533 | 0.491112 | 0.609801625 |
| YJEFN3    | 19p13.11 | 0.03532  | 0.491274 | 0.609954525 |
| OR52I2    | 11p15.4  | -0.03532 | 0.491296 | 0.609954525 |
| ST7-AS2   | 7q31.2   | 0.035309 | 0.491408 | 0.61005675  |
| HIPK4     | 19q13.2  | -0.0353  | 0.491542 | 0.610135921 |
| EXOG      | 3p22.2   | -0.0353  | 0.491545 | 0.610135921 |
| KRT13     | 17q21.2  | -0.0353  | 0.491564 | 0.610135921 |
| HIST1H2AB | 6p22.2   | -0.03529 | 0.491702 | 0.610234703 |
| GJA3      | 13q12.11 | 0.035285 | 0.491704 | 0.610234703 |
| POM121L1P | 22q11.22 | 0.035264 | 0.491964 | 0.610519287 |
| KLK4      | 19q13.41 | -0.03526 | 0.49204  | 0.610575777 |
| IKBKE     | 1q32.1   | -0.03525 | 0.492111 | 0.610626076 |
| RGS3      | 9q32     | 0.035249 | 0.492145 | 0.610630914 |
| UTP20     | 12q23.2  | -0.03524 | 0.492222 | 0.610688269 |
| SUGP2     | 19p13.11 | -0.03523 | 0.492349 | 0.610807992 |
| OR2T12    | 1q44     | 0.035224 | 0.492453 | 0.610863622 |
| HK3       | 5q35.2   | 0.035224 | 0.492455 | 0.610863622 |
| MDGA1     | 6p21.2   | -0.03521 | 0.492587 | 0.610989917 |
| GFOD2     | 16q22.1  | -0.03519 | 0.492889 | 0.611217604 |
| PRKACA    | 19p13.12 | 0.035189 | 0.492889 | 0.611217604 |
| CT45A3    | Xq26.3   | -0.03519 | 0.492902 | 0.611217604 |
| NFE2L2    | 2q31.2   | -0.03519 | 0.492913 | 0.611217604 |
| ZNRF2P1   | 7p14.3   | -0.03519 | 0.492923 | 0.611217604 |
| LINC00908 | 18q23    | -0.03518 | 0.493007 | 0.611258405 |
| UGT2A3    | 4q13.2   | -0.03518 | 0.493025 | 0.611258405 |
| FPR3      | 19q13.41 | 0.035176 | 0.493048 | 0.611258405 |
| TAF3      | 10p14    | -0.03517 | 0.493088 | 0.611269809 |
| SPSB2     | 12p13.31 | -0.03516 | 0.493273 | 0.611461776 |
| BMP10     | 2p13.3   | 0.03514  | 0.493489 | 0.61169164  |
| DEUP1     | 11q21    | 0.03512  | 0.493733 | 0.611956085 |
| S100B     | 21q22.3  | 0.035096 | 0.494039 | 0.61227586  |
| HNRNPU    | 1q44     | -0.03509 | 0.494052 | 0.61227586  |
| TTC1      | 5q33.3   | -0.03509 | 0.494129 | 0.612321636 |
| CERS2     | 1q21.3   | 0.035087 | 0.49415  | 0.612321636 |
| TACR2     | 10q22.1  | 0.03507  | 0.494358 | 0.612541618 |
| DMGDH     | 5q14.1   | -0.03506 | 0.494455 | 0.612623638 |
| TMPRSS11F | 4q13.2   | 0.035058 | 0.494502 | 0.61264438  |
| THSD7A    | 7p21.3   | -0.03502 | 0.494972 | 0.613188108 |
| C2CD4D    | 1q21.3   | -0.03502 | 0.495029 | 0.613221429 |
| EIF5      | 14q32.32 | -0.03501 | 0.495113 | 0.613287075 |
| MTRR      | 5p15.31  | 0.035003 | 0.495179 | 0.613331325 |
| RGS9      | 17q24.1  | 0.034994 | 0.495296 | 0.61343775  |
| KBTBD3    | 11q22.3  | -0.03499 | 0.495373 | 0.61349544  |
| ZIK1      | 19q13.43 | -0.03496 | 0.495679 | 0.613836918 |
| UBE2Q1    | 1q21.3   | 0.03491  | 0.496321 | 0.614565348 |
| MAB21L1   | 13q13.3  | -0.03491 | 0.496329 | 0.614565348 |
| FEZ2      | 2p22.2   | -0.0349  | 0.496404 | 0.614584483 |
| SNORA78   | 16p13.3  | 0.034904 | 0.496406 | 0.614584483 |
| MAMDC4    | 9q34.3   | 0.034898 | 0.496473 | 0.614629266 |
| NOL6      | 9p13.3   | 0.034893 | 0.496536 | 0.614670239 |
| PRR30     | 2p23.3   | -0.03488 | 0.496645 | 0.614766901 |

|           |               |          |          |             |
|-----------|---------------|----------|----------|-------------|
| HTR3B     | 11q23.2       | -0.03488 | 0.49668  | 0.614771356 |
| DIAPH3    | 13q21.2       | 0.034875 | 0.496754 | 0.614797939 |
| CDC27     | 17q21.32      | 0.034875 | 0.496762 | 0.614797939 |
| PSMD5     | 9q33.2        | 0.034859 | 0.496962 | 0.61500673  |
| PCK2      | 14q11.2-q12   | 0.034855 | 0.49701  | 0.615027961 |
| C20ORF197 | 20q13.33      | -0.03484 | 0.497198 | 0.615222609 |
| API5      | 11p12         | 0.034831 | 0.497305 | 0.615295664 |
| TAS2R14   | 12p13.2       | -0.03483 | 0.497318 | 0.615295664 |
| FBXO36    | 2q36.3        | 0.034808 | 0.497588 | 0.61559174  |
| DMKN      | 19q13.12      | -0.0348  | 0.49764  | 0.615617934 |
| ZNF192P1  | 6p22.1        | -0.03479 | 0.497824 | 0.615807286 |
| NANOS2    | 19q13.32      | -0.03479 | 0.497863 | 0.615817355 |
| OR8D2     | 11q24.2       | -0.03476 | 0.49816  | 0.616147498 |
| OR2M3     | 1q44          | -0.03476 | 0.498241 | 0.616209281 |
| ABCA1     | 9q31.1        | -0.03475 | 0.498316 | 0.616264052 |
| GPR32     | 19q13.33      | 0.034738 | 0.49845  | 0.616391627 |
| IMPDH2    | 3p21.31       | -0.03472 | 0.498636 | 0.616583163 |
| LYRM7     | 5q23.3-q31.1  | 0.034705 | 0.49886  | 0.616821807 |
| C1ORF43   | 1q21.3        | 0.03468  | 0.499174 | 0.617172528 |
| C1ORF174  | 1p36.32       | 0.034671 | 0.499278 | 0.617262951 |
| LILRA6    | 19q13.42      | 0.034663 | 0.499377 | 0.617346785 |
| HSD3B1    | 1p12          | -0.03466 | 0.499413 | 0.617353128 |
| YTHDC1    | 4q13.2        | -0.03464 | 0.499614 | 0.617563903 |
| CNIH2     | 11q13.2       | 0.034631 | 0.499779 | 0.617726437 |
| TMEM132E  | 17q12         | -0.03463 | 0.499817 | 0.617726437 |
| DIS3L     | 15q22.31      | 0.034626 | 0.499838 | 0.617726437 |
| LINC00671 | 17q21.31      | -0.03459 | 0.500284 | 0.618239058 |
| OR51G2    | 11p15.4       | -0.03458 | 0.500384 | 0.61832436  |
| EVPL      | 17q25.1       | -0.03457 | 0.500513 | 0.618411668 |
| NT5C1A    | 1p34.2        | -0.03457 | 0.500516 | 0.618411668 |
| HAPLN3    | 15q26.1       | -0.03456 | 0.500711 | 0.618585679 |
| RXFP4     | 1q22          | -0.03456 | 0.500719 | 0.618585679 |
| SNORA6    | 3p22.1        | 0.034552 | 0.500757 | 0.618594695 |
| USP29     | 19q13.43      | 0.034547 | 0.500813 | 0.618594695 |
| SNORA71B  | 20q11.23      | 0.034547 | 0.500819 | 0.618594695 |
| OSCAR     | 19q13.42      | -0.03454 | 0.50085  | 0.618594695 |
| PYCR1     | 17q25.3       | -0.03454 | 0.500922 | 0.618645588 |
| PIGG      | 4p16.3        | 0.034536 | 0.500956 | 0.618650311 |
| SNW1      | 14q24.3       | 0.03453  | 0.501031 | 0.618704502 |
| ZNF787    | 19q13.43      | 0.034527 | 0.501068 | 0.618712523 |
| EXTL3     | 8p21.1        | -0.03449 | 0.501576 | 0.619301089 |
| SIX5      | 19q13.32      | 0.034482 | 0.501627 | 0.619325595 |
| SSX9P     | Xp11.23       | -0.03447 | 0.501767 | 0.619460095 |
| KIAA2026  | 9p24.1        | 0.034448 | 0.502041 | 0.619727192 |
| KCNQ1     | 11p15.5-p15.4 | -0.03445 | 0.50206  | 0.619727192 |
| GMPR2     | 14q12         | -0.03445 | 0.502076 | 0.619727192 |
| EPHX1     | 1q42.12       | -0.03443 | 0.502215 | 0.619860112 |
| DCSTAMP   | 8q22.3        | -0.03443 | 0.502262 | 0.619860112 |
| ADAM22    | 7q21.12       | -0.03443 | 0.502276 | 0.619860112 |
| LINC00310 | 21q22.11      | -0.03442 | 0.502348 | 0.619909964 |
| ZNF540    | 19q13.12      | -0.0344  | 0.502592 | 0.620173162 |
| GCHFR     | 15q15.1       | -0.03439 | 0.502728 | 0.620303298 |
| CLIC6     | 21q22.12      | 0.034387 | 0.502803 | 0.620355607 |
| MADD      | 11p11.2       | 0.034385 | 0.502833 | 0.620355607 |
| C5ORF52   | 5q33.3        | 0.034367 | 0.503049 | 0.620583814 |
| NDUFS3    | 11p11.2       | -0.03436 | 0.503197 | 0.620714956 |
| ZDHHC8P1  | 22q11.23      | 0.034352 | 0.503234 | 0.620714956 |
| PDYN      | 20p13         | -0.03435 | 0.503248 | 0.620714956 |

|           |          |          |          |             |
|-----------|----------|----------|----------|-------------|
| GYPA      | 4q31.21  | 0.034348 | 0.503291 | 0.620730283 |
| BRK1      | 3p25.3   | 0.03434  | 0.503392 | 0.620816267 |
| FBN2      | 5q23.3   | -0.03433 | 0.503572 | 0.620999266 |
| PCGEM1    | 2q32.3   | 0.034312 | 0.503737 | 0.621165392 |
| FGR       | 1p35.3   | 0.034304 | 0.503834 | 0.621246417 |
| LVRN      | 5q23.1   | -0.03425 | 0.504463 | 0.621983349 |
| DMTN      | 8p21.3   | -0.03422 | 0.504828 | 0.622395709 |
| KIR2DL1   | 19q13.42 | 0.03419  | 0.505261 | 0.622891365 |
| RHOBTB3   | 5q15     | -0.03418 | 0.505341 | 0.622950568 |
| SALL1     | 16q12.1  | 0.034178 | 0.505405 | 0.622991592 |
| CMAHP     | 6p22.3   | -0.03415 | 0.505764 | 0.623396453 |
| AGA       | 4q34.3   | -0.03414 | 0.50584  | 0.623450713 |
| EID3      | 12q23.3  | -0.03414 | 0.505891 | 0.623475115 |
| PSIP1     | 9p22.3   | -0.03414 | 0.505923 | 0.62347653  |
| TMEM70    | 8q21.11  | -0.03412 | 0.506071 | 0.623616286 |
| TMEM215   | 9p21.1   | -0.03412 | 0.506099 | 0.623616286 |
| ARR3      | Xq13.1   | 0.034116 | 0.506184 | 0.623683748 |
| ALB       | 4q13.3   | -0.03411 | 0.506303 | 0.623792058 |
| TGFBR3    | 1p22.1   | -0.03408 | 0.506575 | 0.624088639 |
| GFRAL     | 6p12.1   | -0.03408 | 0.506612 | 0.624095555 |
| TOB2P1    | 6p22.1   | -0.03405 | 0.506964 | 0.624490062 |
| THAP6     | 4q21.1   | 0.034035 | 0.507191 | 0.624731406 |
| WDTC1     | 1p36.11  | 0.034022 | 0.507347 | 0.624885012 |
| HP        | 16q22.2  | 0.034015 | 0.507445 | 0.624968263 |
| ANKRD36B  | 2q11.2   | -0.034   | 0.507576 | 0.625091227 |
| CALML5    | 10p15.1  | 0.033997 | 0.50766  | 0.625151522 |
| TGM3      | 20p13    | 0.033995 | 0.507688 | 0.625151522 |
| TGM1      | 14q12    | 0.033984 | 0.507828 | 0.625285536 |
| GCDH      | 19p13.13 | -0.03395 | 0.508288 | 0.625813522 |
| DYSF      | 2p13.2   | -0.03393 | 0.508471 | 0.626000347 |
| ITPK1-AS1 | 14q32.12 | 0.033925 | 0.508568 | 0.62608093  |
| LINC01465 | 12q14.1  | -0.03391 | 0.508764 | 0.62628457  |
| EPN1      | 19q13.42 | -0.0339  | 0.508872 | 0.626378639 |
| SMAP1     | 6q13     | 0.033893 | 0.508969 | 0.626459453 |
| FLT3LG    | 19q13.33 | -0.03388 | 0.509085 | 0.626563471 |
| PPP1R10   | 6p21.33  | 0.033874 | 0.509206 | 0.626655503 |
| NEMF      | 14q21.3  | 0.033872 | 0.509222 | 0.626655503 |
| MMP23A    | 1p36.33  | -0.03386 | 0.509436 | 0.626880428 |
| CDC25C    | 5q31.2   | 0.03382  | 0.509871 | 0.627377487 |
| SPATA5L1  | 15q21.1  | -0.03381 | 0.509977 | 0.627468282 |
| C5ORF47   | 5q35.2   | -0.03381 | 0.510029 | 0.627494089 |
| CDKL4     | 2p22.1   | -0.0338  | 0.51008  | 0.627518733 |
| SUCO      | 1q24.3   | -0.03379 | 0.510306 | 0.627757269 |
| EHMT1-IT1 | 9q34.3   | -0.03378 | 0.510357 | 0.627782594 |
| HOXC12    | 12q13.13 | -0.03377 | 0.510454 | 0.627840614 |
| GRWD1     | 19q13.33 | -0.03377 | 0.510467 | 0.627840614 |
| MID1      | Xp22.2   | 0.033758 | 0.510653 | 0.628030129 |
| LOC285847 | 6p21.31  | -0.03376 | 0.510684 | 0.628030129 |
| NTN5      | 19q13.33 | -0.03375 | 0.510742 | 0.628062716 |
| RHOXF1    | Xq24     | 0.033741 | 0.510869 | 0.628180931 |
| ZC3HAV1L  | 7q34     | -0.03372 | 0.511077 | 0.628395446 |
| DNAJB12   | 10q22.1  | 0.033722 | 0.511107 | 0.628395446 |
| SNORA71C  | 20q11.23 | -0.03372 | 0.511142 | 0.628400402 |
| PDE6G     | 17q25.3  | 0.033712 | 0.511226 | 0.62846522  |
| SLCO5A1   | 8q13.3   | 0.033705 | 0.511321 | 0.628543461 |
| ZNF17     | 19q13.43 | -0.0337  | 0.511439 | 0.628649247 |
| KRT4      | 12q13.13 | -0.03368 | 0.511575 | 0.628757901 |
| CYP2S1    | 19q13.2  | 0.033683 | 0.51159  | 0.628757901 |

|              |              |          |          |             |
|--------------|--------------|----------|----------|-------------|
| PGLYRP4      | 1q21.3       | -0.03368 | 0.511623 | 0.628759798 |
| POTED        | 21q11.2      | -0.03367 | 0.511175 | 0.628877127 |
| ATP1B4       | Xq24         | -0.03366 | 0.511842 | 0.628952213 |
| TEX10        | 9q31.1       | -0.03366 | 0.511898 | 0.628981853 |
| ELMO1        | 7p14.2-p14.1 | 0.033628 | 0.512289 | 0.62939255  |
| PHETA2       | 22q13.2      | 0.033627 | 0.512295 | 0.62939255  |
| LINC01547    | 21q22.3      | 0.033619 | 0.512395 | 0.629476762 |
| LRR1         | 14q21.3      | -0.03361 | 0.512508 | 0.629577575 |
| CYP4F30P     | 2q21.1       | 0.033605 | 0.512568 | 0.629607798 |
| STUB1        | 16p13.3      | -0.0336  | 0.512627 | 0.629607798 |
| KIF16B       | 20p12.1      | 0.033601 | 0.512627 | 0.629607798 |
| HBP1         | 7q22.3       | -0.03359 | 0.512711 | 0.629668192 |
| CPO          | 2q33.3       | -0.03359 | 0.512739 | 0.629668192 |
| C8ORF37      | 8q22.1       | 0.033586 | 0.512814 | 0.629720987 |
| CTSL         | 9q21.33      | -0.03358 | 0.512908 | 0.62979859  |
| FAM3C        | 7q31.31      | -0.03358 | 0.512941 | 0.629799814 |
| IGSF5        | 21q22.2      | 0.033565 | 0.51307  | 0.629920084 |
| SCARNA8      | 9p22.1       | -0.03354 | 0.513412 | 0.63030086  |
| KIAA1107     | 1p22.1       | -0.03351 | 0.513774 | 0.630706689 |
| INTS2        | 17q23.2      | -0.0335  | 0.513877 | 0.630794259 |
| TMEM51       | 1p36.21      | -0.03347 | 0.514212 | 0.631167565 |
| TRIM6-TRIM34 | 11p15.4      | -0.03347 | 0.514285 | 0.631198067 |
| TTY7         | Yp11.2       | -0.03347 | 0.5143   | 0.631198067 |
| AUNIP        | 1p36.11      | -0.03346 | 0.514367 | 0.631240919 |
| CACNA1F      | Xp11.23      | -0.03346 | 0.5144   | 0.631243568 |
| ZNF609       | 15q22.31     | 0.033441 | 0.514635 | 0.631492525 |
| LTB          | 6p21.33      | 0.033431 | 0.514759 | 0.631588449 |
| OR4N2        | 14q11.2      | -0.03343 | 0.514776 | 0.631588449 |
| MBLAC2       | 5q14.3       | -0.0334  | 0.515103 | 0.631951427 |
| C19ORF25     | 19p13.3      | -0.0334  | 0.515168 | 0.63196359  |
| BEST4        | 1p34.1       | 0.033398 | 0.515176 | 0.63196359  |
| SNX22        | 15q22.31     | -0.03339 | 0.515231 | 0.631991529 |
| POU1F1       | 3p11.2       | 0.033378 | 0.515431 | 0.63219868  |
| HIST1H3I     | 6p22.1       | 0.03337  | 0.515522 | 0.632271326 |
| DEFB4A       | 8p23.1       | 0.033364 | 0.515607 | 0.632336579 |
| NPAS3        | 14q13.1      | -0.03336 | 0.515674 | 0.632339536 |
| SLC5A7       | 2q12.3       | -0.03336 | 0.515682 | 0.632339536 |
| ACTL7B       | 9q31.3       | -0.03336 | 0.515709 | 0.632339536 |
| LCE3E        | 1q21.3       | -0.03335 | 0.51577  | 0.632339536 |
| TAF1         | 3p14.1       | -0.03335 | 0.515778 | 0.632339536 |
| CAMK1D       | 10p13        | -0.03335 | 0.5158   | 0.632339536 |
| VWA5B2       | 3q27.1       | 0.033346 | 0.51583  | 0.632339536 |
| ZNF395       | 8p21.1       | 0.033342 | 0.515887 | 0.632345599 |
| ATG12        | 5q22.3       | 0.03334  | 0.515908 | 0.632345599 |
| YIPF7        | 4p12         | -0.03334 | 0.51593  | 0.632345599 |
| TMEM8A       | 16p13.3      | -0.03333 | 0.516068 | 0.632476757 |
| HAS1         | 19q13.41     | -0.03332 | 0.516178 | 0.632497151 |
| SNX18        | 5q11.2       | -0.03332 | 0.51618  | 0.632497151 |
| UNC45B       | 17q12        | 0.033318 | 0.51618  | 0.632497151 |
| CD34         | 1q32.2       | -0.03331 | 0.51625  | 0.632544648 |
| RTP1         | 3q27.3       | -0.03331 | 0.516285 | 0.632548091 |
| SNX9         | 6q25.3       | 0.033307 | 0.516323 | 0.632556993 |
| PLP1         | Xq22.2       | -0.0333  | 0.51641  | 0.632589282 |
| TNFRSF8      | 1p36.22      | 0.0333   | 0.516413 | 0.632589282 |
| MELTF        | 3q29         | -0.0333  | 0.516451 | 0.632597118 |
| DUSP13       | 10q22.2      | -0.03329 | 0.516518 | 0.632640176 |
| PIP4P1       | 14q11.2      | -0.03328 | 0.516692 | 0.63281553  |
| HLA-L        | 6p22.1       | 0.033268 | 0.516813 | 0.632924716 |

|           |                |          |          |             |
|-----------|----------------|----------|----------|-------------|
| FAM238B   | 10p12.1        | -0.03326 | 0.516893 | 0.632983747 |
| SAMD12    | 8q24.11-q24.12 | 0.033243 | 0.517129 | 0.633234607 |
| SOCS7     | 17q12          | -0.03323 | 0.517347 | 0.633461877 |
| ZDHHC2    | 8p22           | 0.033223 | 0.517382 | 0.633466375 |
| SPANXN4   | Xq27.3         | -0.03322 | 0.517445 | 0.633504625 |
| APOE      | 19q13.32       | -0.03321 | 0.517564 | 0.633611704 |
| DEFB124   | 20q11.21       | -0.0332  | 0.517705 | 0.633746004 |
| CXCL9     | 4q21.1         | 0.033185 | 0.517863 | 0.633900042 |
| MMRN2     | 10q23.2        | -0.03318 | 0.517904 | 0.633911186 |
| CARD14    | 17q25.3        | 0.033167 | 0.518086 | 0.634083139 |
| PGM2L1    | 11q13.4        | -0.03317 | 0.518107 | 0.634083139 |
| IMPAD1    | 8q12.1         | 0.033147 | 0.518344 | 0.634333778 |
| PRAC2     | 17q21.32       | -0.03313 | 0.518517 | 0.634507039 |
| ONECUT1   | 15q21.3        | -0.03312 | 0.518741 | 0.634741718 |
| HIST1H4L  | 6p22.1         | 0.033111 | 0.518794 | 0.634768783 |
| ZFAND6    | 15q25.1        | -0.03311 | 0.518855 | 0.634804185 |
| LEPROT    | 1p31.3         | 0.033096 | 0.518986 | 0.634904133 |
| ERMP1     | 9p24.1         | 0.033094 | 0.519005 | 0.634904133 |
| EPHB3     | 3q27.1         | 0.033092 | 0.519032 | 0.634904133 |
| NOP14-AS1 | 4p16.3         | 0.033082 | 0.519165 | 0.635028403 |
| DFFA      | 1p36.22        | -0.03307 | 0.519315 | 0.635172649 |
| COASY     | 17q21.2        | -0.03307 | 0.519366 | 0.635176088 |
| TPCN2     | 11q13.3        | 0.033064 | 0.519386 | 0.635176088 |
| NXPE3     | 3q12.3         | 0.033062 | 0.519413 | 0.635176088 |
| GNB3      | 12p13.31       | -0.03303 | 0.519865 | 0.635689773 |
| SPPL2C    | 17q21.31       | 0.033014 | 0.520022 | 0.635843223 |
| LRP1B     | 2q22.1-q22.2   | 0.032936 | 0.52101  | 0.63701311  |
| C16ORF90  | 16p13.3        | -0.03293 | 0.521049 | 0.637021239 |
| ZNF429    | 19p12          | -0.03292 | 0.521169 | 0.637129822 |
| PCDHAC1   | 5q31.3         | 0.032917 | 0.521243 | 0.63718077  |
| PDE7B     | 6q23.3         | 0.032911 | 0.521328 | 0.637245296 |
| MC2R      | 18p11.21       | -0.0329  | 0.521432 | 0.637333808 |
| SNTG1     | 8q11.21        | -0.03289 | 0.521563 | 0.637455241 |
| LAMTOR5   | 1p13.3         | 0.03289  | 0.521595 | 0.637455241 |
| JDP2      | 14q24.3        | -0.03287 | 0.521889 | 0.637750856 |
| CFAP77    | 9q34.13        | -0.03287 | 0.5219   | 0.637750856 |
| FOXJ3     | 1p34.2         | -0.03286 | 0.521938 | 0.637758498 |
| CST13P    | 20p11.21       | 0.032856 | 0.522021 | 0.637820802 |
| INTS11    | 1p36.33        | 0.032848 | 0.522127 | 0.637910681 |
| SUZ12     | 17q11.2        | -0.03284 | 0.522189 | 0.637948438 |
| RC3H1     | 1q25.1         | 0.032838 | 0.522245 | 0.637977833 |
| GRM6      | 5q35.3         | -0.03282 | 0.522421 | 0.63815357  |
| RETREG2   | 2q35           | -0.03282 | 0.522481 | 0.638167226 |
| ZNF25     | 10p11.21       | -0.03282 | 0.522503 | 0.638167226 |
| TENT4A    | 5p15.31        | -0.03282 | 0.522528 | 0.638167226 |
| NSMF      | 9q34.3         | 0.032812 | 0.522577 | 0.638188315 |
| NMBR      | 6q24.1         | -0.03279 | 0.522799 | 0.638420907 |
| ALG14     | 1p21.3         | -0.03278 | 0.522924 | 0.638533885 |
| HSPA13    | 21q11.2        | 0.032781 | 0.522967 | 0.638548302 |
| EXOC6B    | 2p13.2         | 0.032771 | 0.523101 | 0.638672755 |
| PAPOLA    | 14q32.2        | 0.032756 | 0.523284 | 0.638749021 |
| LGSN      | 6q12           | 0.032756 | 0.523287 | 0.638749021 |
| SYCP3     | 12q23.2        | 0.032755 | 0.523305 | 0.638749021 |
| HOOK2     | 19p13.13       | 0.032753 | 0.523323 | 0.638749021 |
| TXNDC8    | 9q31.3         | -0.03275 | 0.523323 | 0.638749021 |
| ZNF99     | 19p12          | -0.03273 | 0.523626 | 0.639079928 |
| PIWIL1    | 12q24.33       | 0.032724 | 0.523701 | 0.639132548 |
| OR52N1    | 11p15.4        | 0.032715 | 0.523815 | 0.63923285  |



|           |              |          |          |             |
|-----------|--------------|----------|----------|-------------|
| STPG2     | 4q22.3-q23   | -0.0327  | 0.524014 | 0.639436507 |
| HIST1H2AC | 6p22.2       | -0.03269 | 0.52412  | 0.639527273 |
| RBAKDN    | 7p22.1       | -0.03268 | 0.524296 | 0.6397023   |
| PRDM7     | 16q24.3      | -0.03267 | 0.52438  | 0.639765749 |
| MYBPC2    | 19q13.33     | -0.03265 | 0.524652 | 0.640059412 |
| VWF       | 12p13.31     | 0.032633 | 0.524851 | 0.640262217 |
| PRUNE1    | 1q21.3       | 0.032627 | 0.524922 | 0.640309989 |
| SPINK7    | 5q32         | 0.032617 | 0.525053 | 0.640431054 |
| LINC00852 | 3p25.3       | -0.0326  | 0.52531  | 0.640705941 |
| LOC553137 | 6q21         | 0.032592 | 0.525373 | 0.640743245 |
| EPC1      | 10p11.22     | 0.032575 | 0.525592 | 0.640971757 |
| LINC01312 | 6q23.2       | -0.03256 | 0.525778 | 0.641158704 |
| TMED6     | 16q22.1      | -0.03255 | 0.525855 | 0.641181866 |
| RNF20     | 9q31.1       | -0.03255 | 0.525861 | 0.641181866 |
| CER1      | 9p22.3       | 0.032545 | 0.525976 | 0.641277422 |
| ERMAP     | 1p34.2       | -0.03254 | 0.526003 | 0.641277422 |
| PSD2      | 5q31.2       | 0.032528 | 0.526185 | 0.641460307 |
| CALCOCO1  | 12q13.13     | -0.03252 | 0.526335 | 0.6416034   |
| VTA1      | 6q24.1-q24.2 | 0.032507 | 0.526458 | 0.641714637 |
| SCARNA11  | 12p13.31     | 0.032495 | 0.526604 | 0.641842177 |
| GTF2H2    | 5q13.2       | 0.032491 | 0.526652 | 0.641842177 |
| PATE1     | 11q24.2      | -0.03249 | 0.526659 | 0.641842177 |
| BRDT      | 1p22.1       | -0.03248 | 0.526807 | 0.641984341 |
| CACNA1A   | 19p13.13     | 0.032476 | 0.526848 | 0.641994346 |
| CRISP2    | 6p12.3       | 0.032461 | 0.527044 | 0.642192806 |
| TRHR      | 8q23.1       | 0.032458 | 0.527075 | 0.642192806 |
| DVL2      | 17p13.1      | -0.03245 | 0.527121 | 0.64221046  |
| IRGM      | 5q33.1       | 0.032444 | 0.527258 | 0.642338046 |
| LIFR      | 5p13.1       | 0.032434 | 0.527387 | 0.642456358 |
| FAHD1     | 16p13.3      | 0.03243  | 0.527434 | 0.642474075 |
| CCDC105   | 19p13.12     | -0.03241 | 0.527635 | 0.642680413 |
| CHST9     | 18q11.2      | -0.03238 | 0.528029 | 0.643121376 |
| HTR4      | 5q32         | -0.03237 | 0.52815  | 0.643229143 |
| FZD3      | 8p21.1       | -0.03237 | 0.528191 | 0.643239988 |
| FLJ37201  | 10q23.31     | -0.03236 | 0.528272 | 0.643285843 |
| SNTG2     | 2p25.3       | 0.032363 | 0.528293 | 0.643285843 |
| RHBDD1    | 2q36.3       | -0.03236 | 0.528375 | 0.643315058 |
| OR1L1     | 9q33.2       | -0.03236 | 0.528381 | 0.643315058 |
| BRD2      | 6p21.32      | 0.032345 | 0.528518 | 0.64344217  |
| UFL1      | 6q16.1       | -0.03234 | 0.528628 | 0.643536756 |
| PGP       | 16p13.3      | -0.03233 | 0.528691 | 0.643548772 |
| TRPV2     | 17p11.2      | 0.032331 | 0.528702 | 0.643548772 |
| USP32P2   | 17p11.2      | 0.032319 | 0.528844 | 0.643683444 |
| CDK15     | 2q33.1       | 0.032313 | 0.52892  | 0.643736211 |
| DYTN      | 2q33.3       | -0.0323  | 0.529068 | 0.643877219 |
| DUSP23    | 1q23.2       | 0.032299 | 0.529105 | 0.643881267 |
| TMEM81    | 1q32.1       | -0.0323  | 0.529136 | 0.643881267 |
| PELI3     | 11q13.2      | -0.03228 | 0.529342 | 0.644092925 |
| IL1F10    | 2q14.1       | 0.032257 | 0.52964  | 0.64439916  |
| ZFP62     | 5q35.3       | 0.032256 | 0.529658 | 0.64439916  |
| PRODH2    | 19q13.12     | 0.03225  | 0.529728 | 0.644445679 |
| HIST1H3J  | 6p22.1       | -0.03224 | 0.529805 | 0.644499976 |
| PAQR9     | 3q23         | 0.032238 | 0.529886 | 0.644544506 |
| FZD2      | 17q21.31     | 0.032235 | 0.529927 | 0.644544506 |
| CCL4L1    | 17q12        | 0.032234 | 0.529938 | 0.644544506 |
| OR5AU1    | 14q11.2      | -0.03223 | 0.530039 | 0.644628684 |
| TNFSF18   | 1q25.1       | -0.03221 | 0.530269 | 0.644868983 |
| ANGPTL7   | 1p36.22      | -0.0322  | 0.530311 | 0.644880266 |

|           |                    |          |          |             |
|-----------|--------------------|----------|----------|-------------|
| DNAI1     | 9p13.3             | -0.03218 | 0.530672 | 0.645240337 |
| SP110     | 2q37.1             | 0.032175 | 0.530689 | 0.645240337 |
| TAS2R43   | 12p13.2            | -0.03217 | 0.530703 | 0.645240337 |
| SAG       | 2q37.1             | -0.03217 | 0.530812 | 0.645318176 |
| THAP4     | 2q37.3             | -0.03216 | 0.530832 | 0.645318176 |
| SEPTIN6   | Xq24               | -0.03215 | 0.530945 | 0.645416152 |
| MYCBP     | 1p34.3             | 0.032134 | 0.531212 | 0.645678866 |
| CEP152    | 15q21.1            | -0.03213 | 0.531256 | 0.645678866 |
| PLA2G2E   | 1p36.13            | -0.03213 | 0.531258 | 0.645678866 |
| COPE      | 19p13.11           | 0.032127 | 0.531297 | 0.645687639 |
| LOC202181 | 5q35.3             | 0.032122 | 0.531363 | 0.645728748 |
| KIAA1958  | 9q32               | -0.03212 | 0.531443 | 0.645770123 |
| OR1J4     | 9q33.2             | -0.03211 | 0.531462 | 0.645770123 |
| FAM98A    | 2p22.3             | -0.03211 | 0.531545 | 0.645832003 |
| NTSR2     | 2p25.1             | 0.032105 | 0.531586 | 0.645842692 |
| ACKR1     | 1q23.2             | -0.03209 | 0.531713 | 0.645887981 |
| PCDHGA12  | 5q31.3             | -0.03209 | 0.531747 | 0.645887981 |
| REEP6     | 19p13.3            | 0.032092 | 0.531751 | 0.645887981 |
| KBTBD13   | 15q22.31           | 0.032091 | 0.531759 | 0.645887981 |
| ARG2      | 14q24.1            | -0.03209 | 0.531784 | 0.645887981 |
| RIMS4     | 20q13.12           | -0.03207 | 0.531994 | 0.64610302  |
| HPSE2     | 10q24.2            | 0.032064 | 0.532112 | 0.64618931  |
| ACOXL     | 2q13               | 0.032062 | 0.532129 | 0.64618931  |
| BDNF-AS   | 11p14.1            | -0.03205 | 0.532269 | 0.64632005  |
| ROPN1L    | 5p15.2             | 0.032009 | 0.532814 | 0.646942658 |
| IRF7      | 11p15.5            | 0.032003 | 0.532889 | 0.646994604 |
| ZNRF4     | 19p13.3            | 0.031989 | 0.533072 | 0.647176524 |
| S100A11   | 1q21.3             | 0.031966 | 0.533358 | 0.647485263 |
| CAPN12    | 19q13.2            | -0.03196 | 0.533491 | 0.647606739 |
| MUC12     | 7q22.1             | -0.03195 | 0.533551 | 0.647641154 |
| HHIPL2    | 1q41               | 0.031947 | 0.5336   | 0.647661322 |
| PWAR4     | 15q11.2            | -0.03194 | 0.533644 | 0.647674621 |
| SPP2      | 2q37.1             | -0.03194 | 0.53375  | 0.647741982 |
| FRA10AC1  | 10q23.33           | 0.031935 | 0.533764 | 0.647741982 |
| MYBPC3    | 11p11.2            | 0.031931 | 0.533813 | 0.647762723 |
| PALB2     | 16p12.2            | -0.03192 | 0.533973 | 0.647917967 |
| TUBA3FP   | 22q11.21           | -0.03189 | 0.534394 | 0.648371926 |
| DIP2C     | 10p15.3            | 0.031884 | 0.534412 | 0.648371926 |
| CDKN2AIP  | 4q35.1             | 0.031868 | 0.534625 | 0.648590611 |
| CCNA1     | 13q13.3            | -0.03186 | 0.534732 | 0.648680646 |
| CSF2RA    | Xp22.33 and Yp11.2 | -0.03185 | 0.534846 | 0.648754257 |
| SNAR-C4   | 19q13.33           | 0.031849 | 0.534857 | 0.648754257 |
| CCDC42    | 17p13.1            | 0.031845 | 0.53492  | 0.648776026 |
| NEIL3     | 4q34.3             | 0.031843 | 0.53494  | 0.648776026 |
| MARCO     | 2q14.2             | -0.03183 | 0.535097 | 0.648926833 |
| OR2AK2    | 1q44               | 0.031824 | 0.535181 | 0.648990505 |
| YRDC      | 1p34.3             | -0.03182 | 0.535246 | 0.649014087 |
| SLC22A7   | 6p21.1             | 0.031818 | 0.535266 | 0.649014087 |
| TSGA10IP  | 11q13.1            | 0.031793 | 0.535583 | 0.64935928  |
| MRGPRD    | 11q13.3            | -0.03178 | 0.535711 | 0.649475318 |
| NBPF6     | 1p13.3             | -0.03178 | 0.535761 | 0.649496476 |
| ALG11     | 13q14.3            | 0.031765 | 0.535946 | 0.649681346 |
| BLID      | 11q24.1            | -0.03176 | 0.536046 | 0.64976386  |
| LINC00575 | 4q21.22            | -0.03175 | 0.536122 | 0.649815896 |
| CLEC4F    | 2p13.3             | -0.03175 | 0.536181 | 0.649832399 |
| OAS1      | 12q24.13           | 0.031745 | 0.5362   | 0.649832399 |
| C1ORF159  | 1p36.33            | -0.03174 | 0.536301 | 0.649915384 |
| LGI1      | 10q23.33           | -0.03171 | 0.536614 | 0.650226445 |

|           |               |          |          |             |
|-----------|---------------|----------|----------|-------------|
| LINC00336 | 6p21.31       | -0.03171 | 0.536639 | 0.650226445 |
| PRNT      | 20p13         | -0.03171 | 0.536655 | 0.650226445 |
| BCYRN1    | 2p21          | 0.031706 | 0.536699 | 0.650236627 |
| FCGR3A    | 1q23.3        | 0.031704 | 0.536729 | 0.650236627 |
| KLHL11    | 17q21.2       | 0.031697 | 0.536817 | 0.65030456  |
| SUCNR1    | 3q25.1        | 0.031685 | 0.536965 | 0.650444469 |
| DOCK3     | 3p21.2        | -0.03168 | 0.537073 | 0.650535943 |
| SCARNA17  | 18q21.1       | -0.03163 | 0.537635 | 0.651177303 |
| COQ8B     | 19q13.2       | -0.03163 | 0.53767  | 0.651179875 |
| MPL       | 1p34.2        | 0.031618 | 0.537836 | 0.651341741 |
| PECAM1    | 17q23.3       | -0.03162 | 0.537869 | 0.651342606 |
| KRTAP9-2  | 17q21.2       | -0.0316  | 0.538092 | 0.651572775 |
| ARC       | 8q24.3        | -0.03158 | 0.538304 | 0.651754451 |
| PODXL2    | 3q21.3        | 0.031581 | 0.538307 | 0.651754451 |
| TNFRSF9   | 1p36.23       | 0.031576 | 0.538376 | 0.651770675 |
| LYPD2     | 8q24.3        | 0.031574 | 0.538403 | 0.651770675 |
| TAS2R30   | 12p13.2       | 0.031572 | 0.538418 | 0.651770675 |
| UBE2M     | 19q13.43      | -0.03155 | 0.538723 | 0.652100101 |
| TAGLN3    | 3q13.2        | -0.03154 | 0.538798 | 0.652151683 |
| FANCM     | 14q21.2       | 0.031538 | 0.538858 | 0.652183547 |
| XAGE3     | Xp11.22       | -0.03154 | 0.538889 | 0.652183547 |
| PTRH1     | 9q34.11       | 0.031529 | 0.538973 | 0.652246088 |
| ERO1B     | 1q42.3        | 0.031526 | 0.539016 | 0.652258711 |
| RAD51AP2  | 2p24.2        | -0.03152 | 0.5391   | 0.652320578 |
| NKAPL     | 6p22.1        | -0.03151 | 0.539202 | 0.652404686 |
| BATF      | 14q24.3       | -0.0315  | 0.539346 | 0.652539774 |
| TNFRSF1B  | 1p36.22       | 0.031493 | 0.539444 | 0.652617805 |
| PMS2P4    | 7q11.21       | -0.03148 | 0.539613 | 0.65275709  |
| AZIN2     | 1p35.1        | 0.031479 | 0.539624 | 0.65275709  |
| A2M       | 12p13.31      | -0.03146 | 0.539899 | 0.653049934 |
| PRKACG    | 9q21.11       | -0.03145 | 0.539987 | 0.65306231  |
| CSRP1     | 1q32.1        | 0.031449 | 0.540012 | 0.65306231  |
| SLC22A14  | 3p22.2        | -0.03145 | 0.540014 | 0.65306231  |
| RNF165    | 18q21.1       | 0.031447 | 0.540039 | 0.65306231  |
| TRIML1    | 4q35.2        | -0.03144 | 0.540115 | 0.653110366 |
| GMNN      | 6p22.3        | 0.031436 | 0.540179 | 0.653110366 |
| MS4A3     | 11q12.1       | 0.031434 | 0.540195 | 0.653110366 |
| STRBP     | 9q33.3        | -0.03143 | 0.540209 | 0.653110366 |
| RNASE13   | 14q11.2       | 0.031421 | 0.540367 | 0.653254698 |
| RRH       | 4q25          | 0.031418 | 0.540409 | 0.653254698 |
| SYT16     | 14q23.2       | -0.03142 | 0.540444 | 0.653254698 |
| TPRN      | 9q34.3        | -0.03141 | 0.540459 | 0.653254698 |
| IFNL3     | 19q13.2       | -0.0314  | 0.540586 | 0.653357979 |
| CACNA2D3  | 3p21.1-p14.3  | -0.0314  | 0.54061  | 0.653357979 |
| NHS       | Xp22.2-p22.13 | -0.0314  | 0.540648 | 0.653362833 |
| FABP7     | 6q22.31       | 0.031397 | 0.540679 | 0.653362833 |
| CLUU1     | 12q22         | 0.031392 | 0.540743 | 0.653394013 |
| ZMYM1     | 1p34.3        | 0.03139  | 0.54077  | 0.653394013 |
| RNF5      | 6p21.32       | -0.03138 | 0.540937 | 0.653527431 |
| ALOX12P2  | 17p13.1       | 0.031375 | 0.540965 | 0.653527431 |
| ASB16-AS1 | 17q21.31      | -0.03137 | 0.540979 | 0.653527431 |
| TAS2R40   | 7q34          | -0.03137 | 0.541039 | 0.653561466 |
| SAV1      | 14q22.1       | 0.031365 | 0.541087 | 0.653579463 |
| SERTAD1   | 19q13.2       | 0.031356 | 0.541212 | 0.653686704 |
| RSPO1     | 1p34.3        | -0.03135 | 0.541241 | 0.653686704 |
| CLN6      | 15q23         | -0.03133 | 0.541548 | 0.654002344 |
| CCDC189   | 16p11.2       | 0.031328 | 0.541568 | 0.654002344 |
| BLOC1S6   | 15q21.1       | 0.031323 | 0.541637 | 0.654028364 |

|           |               |          |          |             |
|-----------|---------------|----------|----------|-------------|
| SCN4B     | 11q23.3       | -0.03132 | 0.541668 | 0.654028364 |
| MAP4K5    | 14q22.1       | -0.03132 | 0.541687 | 0.654028364 |
| BRCA1     | 17q21.31      | 0.031312 | 0.541776 | 0.65409633  |
| TFEB      | 6p21.1        | 0.031295 | 0.541996 | 0.65432205  |
| LOC606724 | 16p11.2       | 0.031271 | 0.542303 | 0.654625843 |
|           | 9-Mar 12q14.1 | -0.03127 | 0.542313 | 0.654625843 |
| MMRN1     | 4q22.1        | 0.031264 | 0.542399 | 0.654690198 |
| ANO5      | 11p14.3       | 0.031259 | 0.542456 | 0.654720242 |
| ZNF354A   | 5q35.3        | -0.03124 | 0.542726 | 0.655006022 |
| HEPACAM   | 11q24.2       | -0.03123 | 0.542884 | 0.655157176 |
| FCGR3B    | 1q23.3        | 0.031222 | 0.542934 | 0.655178896 |
| TVP23A    | 16p13.13      | 0.031203 | 0.543181 | 0.655407008 |
| CIDEA     | 18p11.21 18   | -0.0312  | 0.543189 | 0.655407008 |
| CSAG2     | Xq28          | -0.03117 | 0.543669 | 0.655947129 |
| PILRA     | 7q22.1        | 0.03116  | 0.543735 | 0.655986658 |
| ESRP1     | 8q22.1        | -0.03116 | 0.543802 | 0.656027776 |
| ZYG11B    | 1p32.3        | 0.031135 | 0.544064 | 0.656304073 |
| AGRP      | 16q22.1       | -0.03111 | 0.544331 | 0.656587579 |
| PHKA1     | Xq13.1        | -0.0311  | 0.544529 | 0.65678628  |
| OR2B11    | 1q44          | 0.031096 | 0.544563 | 0.656787963 |
| CRTC2     | 1q21.3        | 0.031082 | 0.544755 | 0.656957473 |
| OR2T33    | 1q44          | 0.031078 | 0.544797 | 0.656957473 |
| EIF3I     | 1p35.2        | -0.03108 | 0.544802 | 0.656957473 |
| ZNF703    | 8p11.23       | -0.03106 | 0.544997 | 0.657153225 |
| GPR119    | Xq26.1        | -0.03106 | 0.545079 | 0.657212853 |
| NDUFB3    | 2q33.1        | -0.03103 | 0.545393 | 0.657551508 |
| TAF9      | 5q13.2        | 0.031006 | 0.545736 | 0.657925567 |
| PIWIL3    | 22q11.23      | 0.031001 | 0.545804 | 0.657967879 |
| EEF1A1    | 6q13          | -0.03099 | 0.545895 | 0.658001832 |
| TSTD2     | 9q22.33       | -0.03099 | 0.545898 | 0.658001832 |
| MAF       | 16q23.2       | -0.03098 | 0.546026 | 0.658116945 |
| LINC00488 | 3q13.13       | 0.03098  | 0.546076 | 0.658137471 |
| FBXL21P   | 5q31.1        | -0.03095 | 0.546401 | 0.658489403 |
| PYDC2     | 3q28          | -0.03094 | 0.546543 | 0.658587531 |
| S1PR2     | 19p13.2       | 0.030943 | 0.546548 | 0.658587531 |
| KLHDC1    | 14q21.3       | -0.03091 | 0.54696  | 0.659035888 |
| PLA2G2F   | 1p36.12       | 0.030909 | 0.546986 | 0.659035888 |
| GEMIN8P4  | 1p22.2        | 0.030897 | 0.547152 | 0.659195432 |
| UBLCP1    | 5q33.3        | 0.030893 | 0.547194 | 0.65920626  |
| MYPOP     | 19q13.32      | -0.03089 | 0.547244 | 0.659227184 |
| AP2M1     | 3q27.1        | -0.03088 | 0.547333 | 0.659295225 |
| CHRNA1    | 17p13.1       | -0.03085 | 0.5478   | 0.659817692 |
| SCRN2     | 17q21.32      | -0.03084 | 0.54792  | 0.659877536 |
| CNGA3     | 2q11.2        | -0.03084 | 0.54793  | 0.659877536 |
| PMP22     | 17p12         | 0.030835 | 0.547956 | 0.659877536 |
| CDKL5     | Xp22.13       | -0.03083 | 0.547981 | 0.659877536 |
| SPAG9     | 17q21.33      | -0.03081 | 0.548281 | 0.660188899 |
| HRH2      | 5q35.2        | 0.030808 | 0.548306 | 0.660188899 |
| SNORA22   | 7q11.21       | -0.0308  | 0.548381 | 0.660239768 |
| PRDM15    | 21q22.3       | -0.03078 | 0.548633 | 0.660472742 |
| MYL6      | 12q13.2       | 0.030782 | 0.548642 | 0.660472742 |
| C12ORF50  | 12q21.32      | -0.03078 | 0.548674 | 0.660472742 |
| PFN1P2    | 1p11.2        | -0.03077 | 0.548812 | 0.660537387 |
| SEMA3E    | 7q21.11       | -0.03077 | 0.54882  | 0.660537387 |
| RBM17     | 10p15.1       | -0.03077 | 0.548826 | 0.660537387 |
| TMEM100   | 17q22         | -0.03075 | 0.549073 | 0.660778289 |
| SPANXN3   | Xq27.3        | 0.030747 | 0.549092 | 0.660778289 |
| COX6A2    | 16p11.2       | 0.030731 | 0.549301 | 0.660955779 |

|          |                |          |          |             |
|----------|----------------|----------|----------|-------------|
| UNCX     | 7p22.3         | 0.030731 | 0.549306 | 0.660955779 |
| STX5     | 11q12.3        | 0.030716 | 0.549503 | 0.661125337 |
| CHD8     | 14q11.2        | 0.030714 | 0.549526 | 0.661125337 |
| MCCD1    | 6p21.33        | -0.03071 | 0.549546 | 0.661125337 |
| PRKCI    | 3q26.2         | 0.030697 | 0.54975  | 0.661325021 |
| GPRIN2   | 10q11.22       | 0.030694 | 0.549778 | 0.661325021 |
| CDK2     | 12q13.2        | -0.03066 | 0.55019  | 0.661780488 |
| ATF7IP2  | 16p13.2-p13.13 | -0.03065 | 0.550313 | 0.66188899  |
| NUF2     | 1q23.3         | -0.03065 | 0.550366 | 0.661913258 |
| ACAA1    | 3p22.2         | -0.03063 | 0.55068  | 0.662250909 |
| ACLY     | 17q21.2        | -0.03062 | 0.550772 | 0.662322355 |
| TIMP1    | Xp11.3         | -0.03059 | 0.551148 | 0.66273424  |
| SNORA38B | 17q24.2        | 0.030564 | 0.551471 | 0.663082531 |
| HIST1H3D | 6p22.2         | -0.03056 | 0.551526 | 0.663109787 |
| BBIP1    | 10q25.2        | -0.03054 | 0.551796 | 0.663393694 |
| CXADRP2  | 15q11.2        | 0.03053  | 0.551924 | 0.663501705 |
| BCO2     | 11q23.1        | 0.030523 | 0.552015 | 0.663501705 |
| GXYLT1   | 12q12          | -0.03052 | 0.55202  | 0.663501705 |
| NDUFB6   | 9p21.1         | -0.03052 | 0.552045 | 0.663501705 |
| IL20     | 1q32.1         | 0.030519 | 0.55206  | 0.663501705 |
| GAD2     | 10p12.1        | -0.03052 | 0.552084 | 0.663501705 |
| ASB14    | 3p14.3         | -0.0305  | 0.552275 | 0.663691607 |
| PTPN23   | 3p21.31        | -0.03049 | 0.552389 | 0.663788341 |
| OR56A3   | 11p15.4        | -0.03045 | 0.55291  | 0.664373884 |
| DYNLT3   | Xp11.4         | -0.03045 | 0.552946 | 0.664378262 |
| MAD2L1BP | 6p21.1         | 0.030437 | 0.553132 | 0.664561083 |
| FAM106A  | 17p11.2        | 0.030433 | 0.553182 | 0.66458108  |
| GRK2     | 11q13.2        | -0.03041 | 0.55348  | 0.664899771 |
| IGSF3    | 1p13.1         | -0.0304  | 0.553567 | 0.664931949 |
| GPR52    | 1q25.1         | -0.0304  | 0.553582 | 0.664931949 |
| BPIFA2   | 20q11.21       | 0.030401 | 0.553606 | 0.664931949 |
| ZNF833P  | 19p13.2        | -0.03039 | 0.553736 | 0.665047345 |
| DDX20    | 1p13.2         | -0.03036 | 0.554109 | 0.665456356 |
| KIF23    | 15q23          | 0.030359 | 0.554146 | 0.665460336 |
| SSX1     | Xp11.23        | -0.03035 | 0.554255 | 0.665518432 |
| MCHR1    | 22q13.2        | -0.03035 | 0.554261 | 0.665518432 |
| CT47A2   | Xq24           | 0.03033  | 0.554529 | 0.665800229 |
| FAHD2A   | 2q11.1         | -0.03032 | 0.554722 | 0.665992768 |
| FAM25BP  | 10q11.22       | 0.030297 | 0.554956 | 0.666233814 |
| IAPP     | 12p12.1        | 0.03029  | 0.555056 | 0.666301353 |
| H3F3AP5  | Xp11.22        | 0.030288 | 0.555079 | 0.666301353 |
| STXBP4   | 17q22          | -0.03028 | 0.555157 | 0.666354722 |
| JAGN1    | 3p25.3         | 0.030265 | 0.555381 | 0.666577118 |
| DNAJC21  | 5p13.2         | 0.030263 | 0.555409 | 0.666577118 |
| RACK1    | 5q35.3         | -0.03025 | 0.555521 | 0.666672265 |
| CIP2A    | 3q13.13        | 0.030238 | 0.555735 | 0.666876077 |
| POC1A    | 3p21.2         | 0.030236 | 0.555758 | 0.666876077 |
| TRIM63   | 1p36.11        | 0.030233 | 0.555796 | 0.666882343 |
| SDSL     | 12q24.13       | -0.03022 | 0.555914 | 0.666965626 |
| PBXIP1   | 1q21.3         | -0.03022 | 0.555932 | 0.666965626 |
| ATPAF1   | 1p33           | -0.03022 | 0.555972 | 0.66697016  |
| OPA1     | 3q29           | 0.030217 | 0.556003 | 0.66697016  |
| CDK2AP2  | 11q13.2        | -0.03021 | 0.556132 | 0.667085574 |
| FBXL13   | 7q22.1         | -0.0302  | 0.556203 | 0.667130034 |
| JAZF1    | 7p15.2-p15.1   | -0.0302  | 0.556282 | 0.667184678 |
| IFI6     | 1p35.3         | 0.030183 | 0.556456 | 0.667354143 |
| IFNG     | 12q15          | 0.03018  | 0.556494 | 0.667359044 |
| DNAJC10  | 2q32.1         | 0.030176 | 0.556538 | 0.667372178 |

|             |                   |          |          |             |
|-------------|-------------------|----------|----------|-------------|
| DPRX        | 19q13.42          | 0.030139 | 0.557024 | 0.667914891 |
| KLHL33      | 14q11.2           | 0.030127 | 0.557177 | 0.668059048 |
| MAGEE2      | Xq13.3            | -0.03012 | 0.557217 | 0.668066885 |
| BRF2        | 8p11.23           | -0.03011 | 0.557425 | 0.668276544 |
| C11ORF54    | 11q21             | 0.030052 | 0.55817  | 0.669128995 |
| PRRC2B      | 9q34.13           | -0.03005 | 0.558243 | 0.669133959 |
| GSTCD       | 4q24              | 0.030045 | 0.558255 | 0.669133959 |
| SLC35E2A    | 1p36.33           | -0.03004 | 0.558274 | 0.669133959 |
| DENND5B     | 12p11.21          | 0.030015 | 0.558647 | 0.669540292 |
| MRPL43      | 10q24.31          | 0.02998  | 0.55911  | 0.670054982 |
| ADAT1       | 16q23.1           | -0.02997 | 0.55918  | 0.670099469 |
| RO60        | 1q31.2            | 0.029966 | 0.559299 | 0.670188442 |
| THAP7-AS1   | 22q11.21          | 0.029964 | 0.559321 | 0.670188442 |
| SLFN11      | 17q12             | -0.02996 | 0.559395 | 0.670236312 |
| DPYS        | 8q22.3            | 0.029929 | 0.559785 | 0.67061454  |
| MTFMT       | 15q22.31          | 0.029926 | 0.559821 | 0.67061454  |
| ZNF705D     | 8p23.1            | 0.029924 | 0.559846 | 0.67061454  |
| KLRC2       | 12p13.2           | -0.02992 | 0.559857 | 0.67061454  |
| ZNF823      | 19p13.2           | -0.02992 | 0.559898 | 0.67061454  |
| XRCC6P5     | Xq22.1            | 0.029919 | 0.559911 | 0.67061454  |
| LRTM2       | 12p13.33          | -0.02988 | 0.560469 | 0.671212817 |
| SLC26A8     | 6p21.31           | 0.029876 | 0.560478 | 0.671212817 |
| DALRD3      | 3p21.31           | -0.02987 | 0.560514 | 0.671215363 |
| C14ORF119   | 14q11.2           | 0.029862 | 0.560652 | 0.671341086 |
| KCNJ15      | 21q22.13-q22.2    | -0.02986 | 0.560747 | 0.671414066 |
| PRAMEF9     | 1p36.21           | 0.029849 | 0.560835 | 0.671479317 |
| IL27        | 16p12.1-p11.2     | -0.02983 | 0.561093 | 0.671748146 |
| HNRNPUL1    | 19q13.2           | -0.0298  | 0.561515 | 0.672134225 |
| TCEAL8      | Xq22.1            | -0.0298  | 0.561515 | 0.672134225 |
| C3ORF84     | 3p21.31           | 0.029797 | 0.561516 | 0.672134225 |
| CYYR1       | 21q21.3           | -0.02978 | 0.561741 | 0.672363516 |
| ACY1        | 3p21.2            | -0.02977 | 0.56186  | 0.672465577 |
| SNORA18     | 11q21             | -0.02976 | 0.561985 | 0.672575089 |
| TRMT44      | 4p16.1            | 0.029758 | 0.562024 | 0.672581641 |
| SNORA81     | 3q27.3            | -0.02972 | 0.562466 | 0.673068826 |
| SCARNA27    | 6p24.3            | 0.029722 | 0.562498 | 0.673068826 |
| ZNF557      | 19p13.2           | 0.029717 | 0.562563 | 0.673084764 |
| ATG5        | 6q21              | -0.02972 | 0.562579 | 0.673084764 |
| AGO1        | 1p34.3            | -0.02971 | 0.562667 | 0.673149575 |
| OR2A5       | 7q35              | -0.02971 | 0.562714 | 0.673165663 |
| APOA1       | 11q23.3           | 0.02969  | 0.562925 | 0.673374499 |
| PDSS1       | 10p12.1           | 0.029687 | 0.562955 | 0.673374499 |
| USP30       | 12q24.11          | -0.02968 | 0.563106 | 0.673513094 |
| CFAP45      | 1q23.2            | 0.029673 | 0.56314  | 0.673513094 |
| ZFYVE16     | 5q14.1            | 0.029668 | 0.563213 | 0.673513094 |
| DTX2        | 7q11.23           | -0.02967 | 0.563239 | 0.673513094 |
| CAPZA2      | 7q31.2            | -0.02966 | 0.563293 | 0.673513094 |
| CNNM3       | 2q11.2            | -0.02966 | 0.563293 | 0.673513094 |
| MTDH        | 8q22.1            | -0.02966 | 0.563307 | 0.673513094 |
| HBG1        | 11p15.4           | 0.029657 | 0.563359 | 0.673535674 |
| SNORA61     | 1p35.3            | 0.029653 | 0.563405 | 0.673550313 |
| FAM160B1    | 10q25.3           | 0.029644 | 0.563531 | 0.673660089 |
| FAM167A-AS1 | 8p23.1            | 0.029633 | 0.56367  | 0.673782927 |
| TSFM        | 12q14.1           | 0.029631 | 0.563701 | 0.673782927 |
| UBE4A       | 11q23.3           | -0.02962 | 0.563888 | 0.673966314 |
| SV2C        | 5q13.3            | -0.02961 | 0.563953 | 0.674003685 |
| ACTN1       | 14q24.1 14q22-q24 | -0.02959 | 0.564177 | 0.674231467 |
| FCHSD2      | 11q13.4           | -0.02959 | 0.564245 | 0.674272559 |

|           |              |          |          |             |
|-----------|--------------|----------|----------|-------------|
| OR1Q1     | 9q33.2       | -0.02958 | 0.564331 | 0.674335218 |
| NDUFS5    | 1p34.3       | -0.02957 | 0.564478 | 0.674469956 |
| SMDT1     | 22q13.2      | 0.029564 | 0.564577 | 0.674548324 |
| XKR7      | 20q11.21     | -0.02955 | 0.564728 | 0.674688219 |
| C17ORF77  | 17q25.1      | -0.02955 | 0.564797 | 0.674731001 |
| RPP25L    | 9p13.3       | -0.02954 | 0.564906 | 0.674820712 |
| DCAF10    | 9p13.2       | -0.02953 | 0.565005 | 0.674899084 |
| PSME4     | 2p16.2       | -0.02953 | 0.565053 | 0.674916448 |
| FCN2      | 9q34.3       | -0.02952 | 0.565095 | 0.674925768 |
| STIM1     | 11p15.4      | 0.029519 | 0.56517  | 0.674954987 |
| KIF22     | 16p11.2      | -0.02952 | 0.565187 | 0.674954987 |
| NDUFA1    | Xq24         | -0.02951 | 0.565261 | 0.674976163 |
| PSAP      | 10q22.1      | 0.029511 | 0.565272 | 0.674976163 |
| LINC02685 | 11p11.2      | -0.02951 | 0.565328 | 0.675003353 |
| TRIM37    | 17q22        | -0.0295  | 0.565442 | 0.675099006 |
| TACR1     | 2p12         | -0.02949 | 0.565617 | 0.675248038 |
| RBM46     | 4q32.1       | -0.02948 | 0.565634 | 0.675248038 |
| FBXO43    | 8q22.2       | -0.02947 | 0.565837 | 0.675440006 |
| B3GLCT    | 13q12.3      | 0.029465 | 0.565885 | 0.675440006 |
| NUDT17    | 1q21.1       | 0.029464 | 0.565896 | 0.675440006 |
| FOXN3-AS2 | 14q32.11     | -0.02946 | 0.565973 | 0.675491019 |
| AQP12A    | 2q37.3       | -0.02943 | 0.566368 | 0.675895447 |
| SPCS1     | 3p21.1       | -0.02943 | 0.566379 | 0.675895447 |
| SPATA17   | 1q41         | -0.0294  | 0.566805 | 0.676363738 |
| ACTN3     | 11q13.2      | -0.02938 | 0.567002 | 0.676544248 |
| TAF1L     | 9p21.1       | -0.02938 | 0.567024 | 0.676544248 |
| TAS2R39   | 7q34         | 0.029371 | 0.567119 | 0.67661703  |
| CISD3     | 17q12        | -0.02937 | 0.567192 | 0.676640368 |
| ID2       | 2p25.1       | 0.029365 | 0.567206 | 0.676640368 |
| LCE2A     | 1q21.3       | 0.029354 | 0.56735  | 0.676771394 |
| GGNBP1    | 6p21.31      | 0.029343 | 0.567492 | 0.67690045  |
| ZNF561    | 19p13.2      | 0.029331 | 0.567657 | 0.677056955 |
| ZNF837    | 19q13.43     | -0.02932 | 0.567823 | 0.677215035 |
| SUPT5H    | 19q13.2      | -0.02931 | 0.567985 | 0.677341719 |
| UCHL5     | 1q31.2       | 0.029303 | 0.568019 | 0.677341719 |
| NDUFAB1   | 16p12.2      | -0.0293  | 0.568031 | 0.677341719 |
| PCDH15    | 10q21.1      | 0.0293   | 0.568067 | 0.677344858 |
| ARL15     | 5q11.2       | -0.02928 | 0.568372 | 0.67766813  |
| AGPAT2    | 9q34.3       | 0.029241 | 0.568845 | 0.678160859 |
| IMP3      | 15q24.2      | -0.02924 | 0.568853 | 0.678160859 |
| AKR1C4    | 10p15.1      | -0.02923 | 0.568981 | 0.678272184 |
| TBATA     | 10q22.1      | -0.02918 | 0.569609 | 0.678965546 |
| RTN4RL1   | 17p13.3      | -0.02918 | 0.56963  | 0.678965546 |
| LTA4H     | 12q23.1      | 0.029178 | 0.569676 | 0.678980283 |
| SLC27A1   | 19p13.11     | 0.02917  | 0.569782 | 0.679065496 |
| ZNF223    | 19q13.31     | -0.02915 | 0.569998 | 0.679283134 |
| ABCE1     | 4q31.21      | -0.02914 | 0.570141 | 0.679412498 |
| TOPORS    | 9p21.1       | 0.029125 | 0.570371 | 0.679590053 |
| FAM186A   | 12q13.12     | 0.029125 | 0.570374 | 0.679590053 |
| VPS8      | 3q27.2       | -0.02912 | 0.570391 | 0.679590053 |
| IL21      | 4q27         | -0.02911 | 0.570541 | 0.679706159 |
| NEK9      | 14q24.3      | -0.02911 | 0.570557 | 0.679706159 |
| DHX33     | 17p13.2      | 0.029098 | 0.570734 | 0.679821223 |
| SRSF11    | 1p31.1       | -0.0291  | 0.570742 | 0.679821223 |
| IL1RAPL1  | Xp21.3-p21.2 | -0.0291  | 0.570755 | 0.679821223 |
| GABRR3    | 3q11.2       | 0.029063 | 0.571193 | 0.680302597 |
| FAM9B     | Xp22.31      | 0.029046 | 0.571417 | 0.68031876  |
| ACTRT2    | 1p36.32      | -0.02904 | 0.571547 | 0.68031876  |

|           |               |          |          |             |
|-----------|---------------|----------|----------|-------------|
| RBMY1A3P  | Yp11.2        | -0.02904 | 0.571547 | 0.68031876  |
| FAM197Y2  | Yp11.2        | -0.02904 | 0.571547 | 0.68031876  |
| TFAP2D    | 6p12.3        | -0.02904 | 0.571547 | 0.68031876  |
| KRTAP20-4 | 21q22.11      | -0.02904 | 0.571547 | 0.68031876  |
| TSPY4     | Yp11.2        | -0.02904 | 0.571547 | 0.68031876  |
| CBLL2     | Xp22.11       | -0.02904 | 0.571547 | 0.68031876  |
| DEFB107A  | 8p23.1        | -0.02904 | 0.571547 | 0.68031876  |
| PRAMEF22  | 1p36.21       | -0.02904 | 0.571547 | 0.68031876  |
| NOLC1     | 10q24.32      | -0.02903 | 0.571601 | 0.680342593 |
| AMDHD2    | 16p13.3       | 0.029016 | 0.571817 | 0.680560261 |
| GPATCH4   | 1q22-q23.1    | -0.029   | 0.571969 | 0.680682519 |
| ADIPOQ    | 3q27.3        | -0.029   | 0.571988 | 0.680682519 |
| HIST1H3H  | 6p22.1        | 0.028996 | 0.572091 | 0.680764978 |
| SNORA64   | 16p13.3       | -0.02897 | 0.572377 | 0.681064012 |
| PRH2      | 12p13.2       | -0.02897 | 0.572474 | 0.681138944 |
| JMJD8     | 16p13.3       | 0.02894  | 0.572822 | 0.681510158 |
| TMEM259   | 19p13.3       | 0.028938 | 0.572854 | 0.681510158 |
| NEFL      | 8p21.2        | 0.028934 | 0.572905 | 0.681530233 |
| ACSM2A    | 16p12.3       | -0.02893 | 0.57302  | 0.681589178 |
| PLPPR2    | 19p13.2       | -0.02893 | 0.573022 | 0.681589178 |
| CSN1S1    | 4q13.3        | -0.02892 | 0.573108 | 0.681627722 |
| BAGE      | 21p11.1       | -0.02892 | 0.573132 | 0.681627722 |
| SLC4A1    | 17q21.31      | 0.028914 | 0.573174 | 0.681627722 |
| PTPN14    | 1q32.3-q41    | 0.028913 | 0.573191 | 0.681627722 |
| NCALD     | 8q22.3        | -0.02891 | 0.573239 | 0.681645003 |
| LINC00319 | 21q22.3       | 0.028902 | 0.573332 | 0.681687336 |
| SIRPD     | 20p13         | 0.028901 | 0.573343 | 0.681687336 |
| SC5D      | 11q23.3-q24.1 | -0.0289  | 0.573411 | 0.681727423 |
| FRMD1     | 6q27          | -0.02889 | 0.573535 | 0.681834486 |
| PPP5C     | 19q13.32      | 0.028863 | 0.573845 | 0.682162895 |
| REXO1     | 19p13.3       | -0.02886 | 0.573897 | 0.682183567 |
| SNCB      | 5q35.2        | -0.02884 | 0.57411  | 0.682396364 |
| SCRT2     | 20p13         | -0.02884 | 0.574201 | 0.682464593 |
| AANAT     | 17q25.1       | 0.028814 | 0.574504 | 0.682783509 |
| C2ORF83   | 2q36.3        | -0.0288  | 0.574645 | 0.682905436 |
| SLC43A3   | 11q12.1       | 0.028801 | 0.574674 | 0.682905436 |
| GNAL      | 18p11.21      | -0.02877 | 0.575052 | 0.683313618 |
| OSBPL8    | 12q21.2       | 0.028766 | 0.575135 | 0.683371698 |
| ELOVL3    | 10q24.32      | 0.028761 | 0.5752   | 0.683408365 |
| CBWD1     | 9p24.3        | 0.028758 | 0.575247 | 0.683423209 |
| LIMS1     | 2q12.3        | 0.028742 | 0.575461 | 0.683637668 |
| CLK2P1    | 7p15.3        | -0.02873 | 0.575576 | 0.683733127 |
| NCF4      | 22q12.3       | 0.028725 | 0.575687 | 0.683825188 |
| DGCR9     | 22q11.21      | 0.028684 | 0.576228 | 0.68442723  |
| PPP2R1A   | 19q13.41      | -0.02868 | 0.5763   | 0.684471884 |
| HOOK1     | 1p32.1        | 0.028671 | 0.576406 | 0.684557159 |
| NEK8      | 17q11.2       | -0.02866 | 0.576498 | 0.684625425 |
| MTMR9     | 8p23.1        | 0.028658 | 0.576581 | 0.684683485 |
| CTRB1     | 16q23.1       | 0.028619 | 0.577095 | 0.685253304 |
| CFHR3     | 1q31.3        | -0.02861 | 0.577176 | 0.68530615  |
| OR1J1     | 9q33.2        | -0.02861 | 0.577208 | 0.68530615  |
| GOLGA2P10 | 15q25.2       | -0.02859 | 0.577461 | 0.685565667 |
| PDGFRA    | 4q12          | -0.02858 | 0.577613 | 0.685695611 |
| PTH2R     | 2q34          | -0.02858 | 0.57765  | 0.685695611 |
| STX1B     | 16p11.2       | -0.02858 | 0.577673 | 0.685695611 |
| USP28     | 11q23.2       | -0.02857 | 0.577722 | 0.685712831 |
| CASP2     | 7q34          | 0.028565 | 0.577816 | 0.685770939 |
| APIP      | 11p13         | -0.02856 | 0.577868 | 0.685770939 |



|           |                 |          |          |             |
|-----------|-----------------|----------|----------|-------------|
| B3GALNT2  | 1q42.3          | -0.02856 | 0.57792  | 0.685770939 |
| NME3      | 16p13.3         | -0.02856 | 0.57794  | 0.685770939 |
| MKRN3     | 15q11.2         | -0.02856 | 0.577942 | 0.685770939 |
| CHIC2     | 4q12            | 0.02853  | 0.57828  | 0.686130955 |
| BAGE2     | 21p11.2         | 0.028518 | 0.578436 | 0.686276119 |
| MGAT4C    | 12q21.31-q21.32 | -0.02849 | 0.578782 | 0.686645822 |
| UPK3A     | 22q13.31        | 0.028475 | 0.579009 | 0.686874054 |
| BUB1      | 2q13            | 0.028469 | 0.57909  | 0.686930095 |
| AP2A2     | 11p15.5         | 0.028465 | 0.579145 | 0.686954107 |
| TFPI      | 2q32.1          | -0.02844 | 0.579469 | 0.687295003 |
| ZMYM6     | 1p34.3          | 0.028438 | 0.579501 | 0.687295003 |
| RBM14     | 11q13.2         | -0.02843 | 0.579647 | 0.687417946 |
| TCEAL9    | Xq22.2          | 0.028425 | 0.579673 | 0.687417946 |
| IPO4      | 14q12           | -0.02842 | 0.579774 | 0.687496448 |
| TM6SF2    | 19p13.11        | -0.02839 | 0.580085 | 0.687793266 |
| KHDRBS1   | 1p35.2          | -0.02839 | 0.580101 | 0.687793266 |
| TOX4      | 14q11.2         | 0.028391 | 0.580127 | 0.687793266 |
| SPRYD4    | 12q13.3         | 0.028378 | 0.580305 | 0.687963745 |
| LINC01634 | 22q11.21        | -0.02837 | 0.580391 | 0.688004909 |
| ARHGEF38  | 4q24            | 0.02837  | 0.580409 | 0.688004909 |
| RNF122    | 8p12            | 0.028363 | 0.580512 | 0.688086844 |
| RIPK4     | 21q22.3         | -0.02835 | 0.580696 | 0.688264145 |
| CENPN     | 16q23.2         | -0.02833 | 0.580883 | 0.688424567 |
| MRPL19    | 2p12            | -0.02833 | 0.5809   | 0.688424567 |
| HSPA8     | 11q24.1         | 0.028328 | 0.580972 | 0.688469005 |
| SLC6A9    | 1p34.1          | -0.02831 | 0.581202 | 0.688700839 |
| IDH3B     | 20p13           | -0.02829 | 0.581464 | 0.688970184 |
| SUN2      | 22q13.1         | 0.028283 | 0.581582 | 0.689069148 |
| LINC00298 | 2p25.1          | -0.02828 | 0.581651 | 0.689111056 |
| GPER1     | 7p22.3          | 0.028264 | 0.581826 | 0.689277306 |
| CD58      | 1p13.1          | 0.028262 | 0.581861 | 0.689277433 |
| FAM171A1  | 10p13           | 0.028242 | 0.582125 | 0.689550236 |
| YIPF6     | Xq12-q13.1      | -0.02824 | 0.582186 | 0.689581029 |
| CACNA1G   | 17q21.33        | -0.02823 | 0.58222  | 0.689581029 |
| PIK3R4    | 3q22.1          | 0.028225 | 0.58235  | 0.689693762 |
| BACH2     | 6q15            | -0.02822 | 0.582469 | 0.689794416 |
| ITGAD     | 16p11.2         | 0.02821  | 0.582546 | 0.689844854 |
| PRAMEF11  | 1p36.21         | -0.02819 | 0.582772 | 0.690071116 |
| DISP3     | 1p36.22         | -0.02816 | 0.583183 | 0.690516724 |
| ITGAX     | 16p11.2         | 0.028143 | 0.583441 | 0.69078199  |
| BRCA2     | 13q13.1         | -0.02812 | 0.583724 | 0.691075421 |
| FLJ36000  | 17p11.2         | -0.02812 | 0.583769 | 0.691088637 |
| OR13C3    | 9q31.1          | 0.028107 | 0.583923 | 0.691230052 |
| BSX       | 11q24.1         | -0.02809 | 0.584102 | 0.691401111 |
| TLL1      | 4q32.3          | 0.028089 | 0.584173 | 0.691443634 |
| KCNAB3    | 17p13.1         | 0.028082 | 0.584268 | 0.691515259 |
| ATG10     | 5q14.1-q14.2    | 0.028077 | 0.584326 | 0.691543263 |
| KCNMA1    | 10q22.3         | 0.028062 | 0.584528 | 0.691741223 |
| KIAA1217  | 10p12.2-p12.1   | 0.028057 | 0.584594 | 0.691778824 |
| KCNK3     | 2p23.3          | -0.02804 | 0.584873 | 0.692067459 |
| HIST1H3A  | 6p22.2          | 0.028032 | 0.584934 | 0.692099032 |
| LINC00574 | 6q27            | -0.02803 | 0.584976 | 0.692108089 |
| PUM1      | 1p35.2          | 0.028018 | 0.585128 | 0.692246544 |
| MAJIN     | 11q13.1         | -0.02801 | 0.585172 | 0.692258177 |
| DROSHA    | 5p13.3          | -0.028   | 0.585312 | 0.692311767 |
| WASHC4    | 12q23.3         | -0.028   | 0.585318 | 0.692311767 |
| PNPO      | 17q21.32        | -0.028   | 0.58533  | 0.692311767 |
| GPR87     | 3q25.1          | -0.028   | 0.585373 | 0.692311767 |

|           |              |          |          |             |
|-----------|--------------|----------|----------|-------------|
| FOXF2     | 6p25.3       | -0.028   | 0.58539  | 0.692311767 |
| NR1D1     | 17q21.1      | -0.02797 | 0.585781 | 0.692733254 |
| FGD6      | 12q22        | 0.027952 | 0.586008 | 0.692960304 |
| CCDC28B   | 1p35.2       | 0.027947 | 0.586068 | 0.692991069 |
| NT5M      | 17p11.2      | -0.02794 | 0.58623  | 0.693141306 |
| PDZD9     | 16p12.2      | -0.02793 | 0.586303 | 0.693186369 |
| MTMR14    | 3p25.3       | -0.02791 | 0.586614 | 0.693513497 |
| RNASE10   | 14q11.2      | -0.0279  | 0.58668  | 0.693549994 |
| C14ORF178 | 14q24.3      | -0.02788 | 0.586927 | 0.693776546 |
| OCM2      | 7q21.3       | -0.02788 | 0.586977 | 0.693776546 |
| OXSM      | 3p24.2       | 0.027877 | 0.587007 | 0.693776546 |
| LOC220729 | 3q29         | 0.027877 | 0.58701  | 0.693776546 |
| FADD      | 11q13.3      | -0.02787 | 0.587143 | 0.693892662 |
| EML4      | 2p21         | 0.02786  | 0.587238 | 0.693964391 |
| ISL2      | 15q24.3      | -0.02786 | 0.587277 | 0.693969515 |
| FPGS      | 9q34.11      | 0.027852 | 0.587345 | 0.69400883  |
| ZNF341    | 20q11.22     | -0.02784 | 0.587446 | 0.694027194 |
| MED13L    | 12q24.21     | 0.027844 | 0.58746  | 0.694027194 |
| OR56B4    | 11p15.4      | -0.02784 | 0.58747  | 0.694027194 |
| SPHKAP    | 2q36.3       | 0.027841 | 0.587499 | 0.694027194 |
| TNNT3     | 11p15.5      | -0.02783 | 0.587582 | 0.6940844   |
| B4GALT3   | 1q23.3       | -0.02783 | 0.587651 | 0.694125076 |
| KRTAP9-8  | 17q21.2      | -0.02782 | 0.587712 | 0.694135377 |
| KLHL12    | 1q32.1       | -0.02782 | 0.587729 | 0.694135377 |
| GDF7      | 2p24.1       | -0.02782 | 0.587767 | 0.694138832 |
| JMY       | 5q14.1       | 0.027806 | 0.587969 | 0.694336856 |
| RBM22     | 5q33.1       | 0.027799 | 0.588062 | 0.694405163 |
| CMTM5     | 14q11.2      | -0.02777 | 0.588413 | 0.694779094 |
| PCDHGB7   | 5q31.3       | -0.02777 | 0.588471 | 0.694806376 |
| SERPINB13 | 18q21.33     | -0.02776 | 0.588536 | 0.694841976 |
| RTRAF     | 14q22.1      | 0.027757 | 0.588617 | 0.694896921 |
| TAOK1     | 17q11.2      | 0.027752 | 0.588686 | 0.694920853 |
| TMEM248   | 7q11.21      | -0.02775 | 0.588707 | 0.694920853 |
| LYRM2     | 6q15         | 0.027744 | 0.588802 | 0.694992576 |
| PVRIG     | 7q22.1       | 0.027684 | 0.589607 | 0.69590111  |
| NLRP2     | 19q13.42     | 0.027671 | 0.589784 | 0.696069752 |
| LINC00189 | 21q21.3      | 0.027663 | 0.589889 | 0.696102657 |
| SGCZ      | 8p22         | 0.027662 | 0.589906 | 0.696102657 |
| PBX3      | 9q33.3       | -0.02766 | 0.589916 | 0.696102657 |
| GBP6      | 1p22.2       | -0.02764 | 0.590179 | 0.696371482 |
| SNORD10   | 17p13.1      | -0.02761 | 0.590566 | 0.696786912 |
| COMMD3    | 10p12.2      | 0.027604 | 0.590684 | 0.696885149 |
| GJC2      | 1q42.13      | 0.027569 | 0.59115  | 0.697394471 |
| RRBP1     | 20p12.1      | 0.027566 | 0.591191 | 0.697401258 |
| MAB21L3   | 1p13.1       | -0.02756 | 0.591333 | 0.697527664 |
| ARHGAP4   | Xq28         | 0.027543 | 0.591504 | 0.697688362 |
| FLACC1    | 2q33.1       | -0.02753 | 0.591634 | 0.697800262 |
| MBD4      | 3q21.3       | 0.027522 | 0.591788 | 0.697941289 |
| NAF1      | 4q32.2       | -0.02752 | 0.591869 | 0.697995941 |
| SUCLG1    | 2p11.2       | -0.0275  | 0.592067 | 0.698187391 |
| CCDC78    | 16p13.3      | -0.0275  | 0.59211  | 0.698197582 |
| PGK1      | Xq21.1       | -0.02749 | 0.59222  | 0.698286434 |
| KLK13     | 19q13.41     | 0.027462 | 0.592588 | 0.698679426 |
| RCOR3     | 1q32.2-q32.3 | -0.02746 | 0.592648 | 0.698686393 |
| ASPHD1    | 16p11.2      | -0.02746 | 0.592664 | 0.698686393 |
| SRSF5     | 14q24.1      | 0.027446 | 0.592812 | 0.698797088 |
| MZT2B     | 2q21.1       | -0.02744 | 0.59283  | 0.698797088 |
| MT1L      | 16q13        | -0.02744 | 0.592863 | 0.698797088 |

|           |              |          |          |             |
|-----------|--------------|----------|----------|-------------|
| OR10G7    | 11q24.2      | 0.027432 | 0.592991 | 0.69890744  |
| OR2C3     | 1q44         | 0.027422 | 0.593133 | 0.698993764 |
| PAK6      | 15q15.1      | 0.027422 | 0.593134 | 0.698993764 |
| PTCRA     | 6p21.1       | 0.027408 | 0.593325 | 0.699176938 |
| BAALC     | 8q22.3       | -0.0274  | 0.593411 | 0.69923734  |
| TMC7      | 16p12.3      | 0.027392 | 0.593544 | 0.6993527   |
| MPV17L2   | 19p13.11     | -0.02738 | 0.593676 | 0.699447863 |
| GABRB1    | 4p12         | -0.02738 | 0.593694 | 0.699447863 |
| GAR1      | 4q25         | -0.02737 | 0.593866 | 0.699609015 |
| SKP2      | 5p13.2       | -0.02736 | 0.593939 | 0.699653397 |
| ID2B      | 3p14.2       | -0.02735 | 0.594043 | 0.699721631 |
| PI4K2A    | 10q24.2      | -0.02735 | 0.594066 | 0.699721631 |
| OVCH2     | 11p15.4      | 0.027345 | 0.594172 | 0.699786443 |
| AZI2      | 3p24.1       | 0.027344 | 0.594191 | 0.699786443 |
| SPATA6L   | 9p24.2-p24.1 | 0.027336 | 0.594287 | 0.699858192 |
| PSG7      | 19q13.31     | 0.027322 | 0.594479 | 0.700043522 |
| KCNK4     | 11q13.1      | -0.02731 | 0.594674 | 0.700231616 |
| RAB37     | 17q25.1      | -0.02729 | 0.594868 | 0.700419048 |
| SPATA16   | 3q26.31      | -0.02726 | 0.595283 | 0.700843214 |
| APOOL     | Xq21.1       | 0.027261 | 0.595299 | 0.700843214 |
| SPACA9    | 9q34.13      | 0.027257 | 0.595357 | 0.700870473 |
| UBN1      | 16p13.3      | -0.02725 | 0.595432 | 0.70091827  |
| HEXA      | 15q23        | 0.027245 | 0.59552  | 0.700979758 |
| GDF15     | 19p13.11     | 0.02722  | 0.595863 | 0.701342495 |
| CDC37     | 19p13.2      | 0.027209 | 0.596005 | 0.701434661 |
| IFT172    | 2p23.3       | 0.027209 | 0.596011 | 0.701434661 |
| TP53      | 17p13.1      | 0.027184 | 0.59634  | 0.701780337 |
| OR5T1     | 11q12.1      | -0.02718 | 0.596423 | 0.701836645 |
| CEBPG     | 19q13.11     | 0.027176 | 0.596459 | 0.701838257 |
| UGGT1     | 2q14.3       | -0.02716 | 0.596663 | 0.70203672  |
| AGMO      | 7p21.2       | -0.02715 | 0.59679  | 0.702108331 |
| SOWAHC    | 2q13         | 0.027151 | 0.596794 | 0.702108331 |
| ASGR2     | 17p13.1      | -0.02714 | 0.596914 | 0.702208915 |
| FGF2      | 4q28.1       | -0.02713 | 0.597018 | 0.702261671 |
| SLC66A1L  | 3q25.32      | -0.02713 | 0.597056 | 0.702261671 |
| BBC3      | 19q13.32     | -0.02713 | 0.597088 | 0.702261671 |
| SPHK1     | 17q25.1      | -0.02713 | 0.5971   | 0.702261671 |
| AMY1A     | 1p21.1       | -0.02712 | 0.597194 | 0.702331779 |
| KIF18A    | 11p14.1      | -0.02711 | 0.597297 | 0.702412035 |
| SSU72     | 1p36.33      | 0.027084 | 0.597696 | 0.70283997  |
| OR51B2    | 11p15.4      | 0.027081 | 0.597735 | 0.702844284 |
| INPP4B    | 4q31.21      | -0.02708 | 0.597798 | 0.702865838 |
| LINC00305 | 18q22.1      | -0.02707 | 0.597824 | 0.702865838 |
| OR10J1    | 1q23.2       | 0.027066 | 0.597938 | 0.702958376 |
| TOMM70    | 3q12.2       | 0.027061 | 0.598011 | 0.703003544 |
| WNT2B     | 1p13.2       | 0.027054 | 0.598107 | 0.703071711 |
| LBX2      | 2p13.1       | 0.027051 | 0.598139 | 0.703071711 |
| CISD1     | 10q21.1      | 0.027045 | 0.598224 | 0.703129769 |
| MRPL46    | 15q25.3      | 0.027038 | 0.598326 | 0.703208208 |
| GINS4     | 8p11.21      | 0.027035 | 0.598361 | 0.703208208 |
| LINC00494 | 20q13.13     | 0.027012 | 0.598671 | 0.703531122 |
| CALHM2    | 10q24.33     | -0.02701 | 0.598722 | 0.70355038  |
| C5AR2     | 19q13.32     | 0.02699  | 0.598977 | 0.703808005 |
| CASTOR3   | 7q22.1       | 0.026984 | 0.599056 | 0.703841018 |
| CKB       | 14q32.33     | -0.02698 | 0.599075 | 0.703841018 |
| KLKP1     | 19q13.33     | -0.02698 | 0.599167 | 0.70386806  |
| PEX1      | 7q21.2       | -0.02698 | 0.599168 | 0.70386806  |
| XCL1      | 1q24.2       | -0.02693 | 0.599821 | 0.704593317 |

|           |              |          |          |             |
|-----------|--------------|----------|----------|-------------|
| ACVR2A    | 2q22.3-q23.1 | 0.026918 | 0.599947 | 0.704700282 |
| LARS2     | 3p21.31      | -0.0269  | 0.600154 | 0.704902287 |
| VASH1     | 14q24.3      | -0.02687 | 0.600534 | 0.705306562 |
| LINC02381 | 12q13.13     | -0.02687 | 0.60058  | 0.705320052 |
| MOV10     | 1p13.2       | -0.02687 | 0.60063  | 0.705336971 |
| BCL2A1    | 15q25.1      | 0.026864 | 0.600674 | 0.705347034 |
| TUBB      | 6p21.33      | -0.02685 | 0.60091  | 0.705569419 |
| RGPD1     | 2p11.2       | 0.026845 | 0.600934 | 0.705569419 |
| LINC00235 | 16p13.3      | -0.02683 | 0.601088 | 0.705709192 |
| WDR49     | 3q26.1       | 0.026831 | 0.601126 | 0.705712093 |
| LINC00242 | 6q27         | 0.026819 | 0.601291 | 0.705865248 |
| PCBD2     | 5q31.1       | 0.026816 | 0.601328 | 0.705866777 |
| C7ORF57   | 7p12.3       | -0.02681 | 0.601393 | 0.705901798 |
| NFXL1     | 4p12         | 0.026793 | 0.601635 | 0.706126167 |
| FGF6      | 12p13.32     | -0.02679 | 0.601655 | 0.706126167 |
| OR52W1    | 11p15.4      | -0.02678 | 0.601874 | 0.706342467 |
| FLJ34503  | 6q21         | -0.02675 | 0.602271 | 0.706766187 |
| NFIX      | 19p13.13     | 0.02672  | 0.602628 | 0.707113376 |
| S100A8    | 1q21.3       | -0.02672 | 0.602637 | 0.707113376 |
| OR4D11    | 11q12.1      | 0.026714 | 0.602718 | 0.707166591 |
| WDFY2     | 13q14.3      | -0.02667 | 0.603245 | 0.707744139 |
| MRPS5     | 2q11.1       | -0.02665 | 0.60352  | 0.707990656 |
| ISCA2     | 14q24.3      | -0.02665 | 0.603526 | 0.707990656 |
| ZP4       | 1q43         | -0.02664 | 0.603774 | 0.70823995  |
| SENP3     | 17p13.1      | -0.02663 | 0.603854 | 0.7082921   |
| HMGA1     | 6p21.31      | 0.026623 | 0.603947 | 0.708360451 |
| CEP170P1  | 4q26         | -0.02662 | 0.603992 | 0.708371417 |
| ANGPTL5   | 11q22.1      | -0.02662 | 0.604045 | 0.708391611 |
| PCDH11Y   | Yp11.2       | 0.026595 | 0.604328 | 0.708682838 |
| NECAB2    | 16q23.3      | -0.02659 | 0.604462 | 0.708798037 |
| TRHDE-AS1 | 12q21.1      | 0.02656  | 0.604806 | 0.709160189 |
| TAC4      | 17q21.33     | 0.026552 | 0.604914 | 0.7092455   |
| MTERF2    | 12q23.3      | -0.02653 | 0.605256 | 0.709580194 |
| MYO5A     | 15q21.2      | -0.02653 | 0.605271 | 0.709580194 |
| SWT1      | 1q25.3       | 0.026519 | 0.60537  | 0.709655418 |
| HELB      | 12q14.3 12q  | 0.026511 | 0.605476 | 0.709728129 |
| MRPL55    | 1q42.13      | -0.02651 | 0.605537 | 0.709728129 |
| PAPOLB    | 7p22.1       | 0.026506 | 0.605539 | 0.709728129 |
| ATG9A     | 2q35         | -0.02647 | 0.605968 | 0.710104027 |
| RSKR      | 17q11.2      | -0.02647 | 0.606024 | 0.710104027 |
| CXORF58   | Xp22.11      | -0.02647 | 0.606065 | 0.710104027 |
| TRAFD1    | 12q24.13     | 0.026467 | 0.606068 | 0.710104027 |
| CENPO     | 2p23.3       | -0.02647 | 0.606071 | 0.710104027 |
| NYAP2     | 2q36.3       | 0.026461 | 0.606154 | 0.710104027 |
| TENT5D    | Xq21.1       | -0.02646 | 0.606168 | 0.710104027 |
| HCRT      | 17q21.2      | -0.02646 | 0.606171 | 0.710104027 |
| SLC25A42  | 19p13.11     | -0.02646 | 0.606211 | 0.710104027 |
| CGA       | 6q14.3       | 0.026457 | 0.606214 | 0.710104027 |
| SEC23A    | 14q21.1      | 0.026452 | 0.606279 | 0.710138426 |
| CCDC127   | 5p15.33      | -0.02644 | 0.606478 | 0.710330388 |
| RIT1      | 1q22         | 0.026429 | 0.606596 | 0.710426205 |
| RPL3L     | 16p13.3      | -0.02641 | 0.606865 | 0.710699975 |
| RPS15AP10 | 1p34.1       | -0.0264  | 0.60696  | 0.710728968 |
| OR4D5     | 11q24.1      | -0.0264  | 0.60696  | 0.710728968 |
| PSMB2     | 1p34.3       | -0.02639 | 0.607112 | 0.710864431 |
| RAB15     | 14q23.3      | -0.02638 | 0.607305 | 0.711028597 |
| HMGN3     | 6q14.1       | -0.02638 | 0.607323 | 0.711028597 |
| MRPS25    | 3p25.1       | -0.02636 | 0.607537 | 0.71123777  |

|           |                        |          |          |             |
|-----------|------------------------|----------|----------|-------------|
| MYL7      | 7p13                   | -0.02632 | 0.608019 | 0.711738252 |
| KLHDC9    | 1q23.3                 | -0.02632 | 0.608058 | 0.711738252 |
| PDCD10    | 3q26.1                 | -0.02632 | 0.608071 | 0.711738252 |
| HTATSF1   | Xq26.3                 | -0.02631 | 0.608183 | 0.711827214 |
| LINC00486 | 2p22.3                 | 0.026298 | 0.608382 | 0.712018558 |
| PPP1R2C   | Xp11.3                 | 0.02628  | 0.608619 | 0.712214367 |
| PRF1      | 10q22.1                | 0.02628  | 0.60862  | 0.712214367 |
| CSNK1A1P1 | 15q14                  | -0.02627 | 0.608739 | 0.712312248 |
| ZNF219    | 14q11.2                | -0.02626 | 0.608943 | 0.712509143 |
| FAM124B   | 2q36.2                 | -0.02625 | 0.609003 | 0.71252881  |
| LCE2D     | 1q21.3                 | 0.026249 | 0.609042 | 0.71252881  |
| CIB3      | 19p13.11               | 0.026245 | 0.609093 | 0.71252881  |
| POM121L4P | 22q11.21               | -0.02624 | 0.609102 | 0.71252881  |
| GAS6      | 13q34                  | 0.026239 | 0.609184 | 0.712582818 |
| OR4E2     | 14q11.2                | 0.026225 | 0.609365 | 0.712752436 |
| PVALEF    | 17q25.3                | -0.02622 | 0.609457 | 0.712818983 |
| LPXN      | 11q12.1                | 0.026204 | 0.609657 | 0.713011228 |
| FBXL4     | 6q16.1-q16.2           | -0.0262  | 0.609722 | 0.713045202 |
| PHF1      | 6p21.32                | 0.026181 | 0.609969 | 0.713292274 |
| ATP23     | 12q14.1                | 0.026177 | 0.610022 | 0.713312496 |
| PRAM1     | 19p13.2                | 0.026167 | 0.610157 | 0.713428961 |
| CTDSP2    | 12q14.1                | -0.02616 | 0.610224 | 0.713466368 |
| NYAP1     | 7q22.1                 | 0.02615  | 0.610392 | 0.713554523 |
| TBL1Y     | Yp11.2                 | -0.02615 | 0.610401 | 0.713554523 |
| SESTD1    | 2q31.2                 | 0.026149 | 0.610407 | 0.713554523 |
| HHATL     | 3p22.1                 | -0.02614 | 0.61059  | 0.713727358 |
| SLC16A8   | 22q13.1                | -0.02613 | 0.610636 | 0.713739186 |
| PRIM1     | 12q13.3                | -0.02611 | 0.610918 | 0.714027671 |
| TADA1     | 1q24.1                 | -0.0261  | 0.611054 | 0.714144142 |
| TSC2      | 16p13.3                | -0.02609 | 0.611151 | 0.714215921 |
| SCAMP3    | 1q22                   | 0.026089 | 0.611233 | 0.714270509 |
| PRY2      | Yq11.223               | 0.026069 | 0.611499 | 0.71451721  |
| STK24     | 13q32.2                | -0.02607 | 0.611516 | 0.71451721  |
| CHDH      | 3p21.1                 | -0.02606 | 0.611607 | 0.714582111 |
| CLK2      | 1q22                   | -0.02605 | 0.611764 | 0.714695791 |
| ST8SIA6   | 10p12.33               | -0.02605 | 0.611776 | 0.714695791 |
| OR2AG1    | 11p15.4                | -0.02604 | 0.611931 | 0.71480058  |
| FPR2      | 19q13.41               | 0.026037 | 0.611937 | 0.71480058  |
| IFNL1     | 19q13.2                | -0.02603 | 0.612096 | 0.714929306 |
| TAFA2     | 12q14.1                | -0.02602 | 0.612127 | 0.714929306 |
| RNH1      | 11p15.5                | 0.026018 | 0.612193 | 0.714929306 |
| RFPL1S    | 22q12.2                | -0.02601 | 0.612251 | 0.714929306 |
| ZNF70     | 22q11.23               | 0.026014 | 0.612255 | 0.714929306 |
| ATP12A    | 13q12.12 13q12.1-q12.3 | 0.026013 | 0.612261 | 0.714929306 |
| KRTAP2-2  | 17q21.2                | 0.026007 | 0.612355 | 0.714996742 |
| WDFY3-AS2 | 4q21.23                | -0.026   | 0.612418 | 0.71502877  |
| SLC22A20P | 11q13.1                | -0.02599 | 0.612629 | 0.715234156 |
| ERCC6L2   | 9q22.32                | -0.02598 | 0.612702 | 0.71527748  |
| CLDN17    | 21q21.3                | 0.025978 | 0.61275  | 0.715291271 |
| TRIM35    | 8p21.2                 | 0.025973 | 0.612814 | 0.715310124 |
| SLC23A2   | 20p13                  | 0.025969 | 0.612867 | 0.715310124 |
| ZNF518A   | 10q24.1                | 0.025969 | 0.612873 | 0.715310124 |
| SEMA4A    | 1q22                   | -0.02596 | 0.612988 | 0.715402515 |
| FAM117B   | 2q33.2                 | 0.025948 | 0.613156 | 0.715525412 |
| PRX       | 19q13.2                | 0.025947 | 0.613165 | 0.715525412 |
| CYP4B1    | 1p33                   | 0.025941 | 0.613248 | 0.715581556 |
| ZNF385D   | 3p24.3                 | -0.02593 | 0.613456 | 0.715782033 |
| ZEB2      | 2q22.3                 | -0.02592 | 0.613559 | 0.715861034 |

|             |          |          |          |             |
|-------------|----------|----------|----------|-------------|
| SERTAD4-AS1 | 1q32.2   | 0.025882 | 0.614059 | 0.716402184 |
| CHTOP       | 1q21.3   | 0.025874 | 0.614164 | 0.716463223 |
| CLRN1       | 3q25.1   | -0.02587 | 0.614183 | 0.716463223 |
| OR2V2       | 5q35.3   | 0.025869 | 0.614237 | 0.716484828 |
| KCNN1       | 19p13.11 | -0.02586 | 0.61437  | 0.716597458 |
| GABRQ       | Xq28     | -0.02585 | 0.614497 | 0.716695998 |
| CHIT1       | 1q32.1   | 0.025848 | 0.614526 | 0.716695998 |
| POGZ        | 1q21.3   | 0.025843 | 0.614591 | 0.716730867 |
| GABARAPL2   | 16q23.1  | -0.02583 | 0.614792 | 0.71692301  |
| LINC00303   | 1q32.1   | -0.02577 | 0.615587 | 0.717795908 |
| GSTO2       | 10q25.1  | 0.025769 | 0.615612 | 0.717795908 |
| NKX2-4      | 20p11.22 | -0.02576 | 0.615671 | 0.717822555 |
| TRIM27      | 6p22.1   | -0.02576 | 0.615751 | 0.717865591 |
| CLDN25      | 11q23.2  | 0.025757 | 0.615779 | 0.717865591 |
| EEF1AKMT2   | 10q26.13 | -0.02575 | 0.615854 | 0.717910922 |
| ALG10       | 12p11.1  | 0.025744 | 0.615957 | 0.717989569 |
| PRELID1     | 5q35.3   | 0.025727 | 0.616191 | 0.718219632 |
| CAMK2N1     | 1p36.12  | -0.02571 | 0.616359 | 0.718373995 |
| MAGEA1      | Xq28     | -0.02571 | 0.616436 | 0.718421981 |
| VPS52       | 6p21.32  | 0.025697 | 0.616592 | 0.718562248 |
| FAM166B     | 9p13.3   | -0.02569 | 0.616652 | 0.718589537 |
| KHDRBS2     | 6q11.1   | 0.025689 | 0.616706 | 0.718611219 |
| FKBP4       | 12p13.33 | 0.025671 | 0.616947 | 0.718823212 |
| NXNL1       | 19p13.11 | 0.025671 | 0.61696  | 0.718823212 |
| BCLAF1      | 6q23.3   | 0.025652 | 0.617218 | 0.719082876 |
| APOA4       | 11q23.3  | -0.02565 | 0.617288 | 0.719088218 |
| ASTN1       | 1q25.2   | -0.02565 | 0.617295 | 0.719088218 |
| STEAP4      | 7q21.12  | 0.02564  | 0.617381 | 0.71914671  |
| KRT84       | 12q13.13 | -0.02563 | 0.617522 | 0.719269145 |
| ART1        | 11p15.4  | 0.02562  | 0.617653 | 0.719380254 |
| CNR1        | 6q15     | -0.02561 | 0.617737 | 0.719435486 |
| C8ORF58     | 8p21.3   | 0.025609 | 0.617798 | 0.719464735 |
| FOLH1       | 11p11.12 | -0.02559 | 0.618046 | 0.719712065 |
| OR12D2      | 6p22.1   | 0.025576 | 0.618254 | 0.719911939 |
| OR51B4      | 11p15.4  | -0.02557 | 0.618293 | 0.719915984 |
| LTB4R       | 14q12    | -0.02554 | 0.618753 | 0.720409416 |
| SCARNA9     | 11q21    | -0.02553 | 0.618831 | 0.720448428 |
| LENEP       | 1q21.3   | -0.02553 | 0.618858 | 0.720448428 |
| PRSS54      | 16q21    | -0.02553 | 0.618903 | 0.720458648 |
| HCG9        | 6p22.1   | -0.02551 | 0.619099 | 0.720633924 |
| HSP90AA1    | 14q32.31 | -0.02551 | 0.619126 | 0.720633924 |
| RXFP3       | 5p13.2   | -0.02549 | 0.619424 | 0.720939571 |
| GJA8        | 1q21.2   | 0.025473 | 0.619679 | 0.721159181 |
| ECM1        | 1q21.2   | 0.025472 | 0.619685 | 0.721159181 |
| MAN1C1      | 1p36.11  | -0.02546 | 0.6198   | 0.72125161  |
| OR8K3       | 11q12.1  | -0.02546 | 0.619862 | 0.72128134  |
| RTN2        | 19q13.32 | 0.025456 | 0.61991  | 0.721295242 |
| RPS4Y2      | Yq11.223 | 0.025432 | 0.620237 | 0.721633713 |
| SMAGP       | 12q13.13 | -0.02542 | 0.620342 | 0.721714345 |
| VCX2        | Xp22.31  | 0.025419 | 0.620415 | 0.721756823 |
| SPECC1L     | 22q11.23 | 0.025416 | 0.620455 | 0.721761406 |
| ABCB10      | 1q42.13  | 0.025412 | 0.620511 | 0.721784936 |
| SPDYE2      | 7q22.1   | -0.0254  | 0.62061  | 0.721858139 |
| CHST8       | 19q13.11 | -0.02538 | 0.621006 | 0.722277472 |
| CD200       | 3q13.2   | 0.025362 | 0.621195 | 0.722437179 |
| RHOG        | 11p15.4  | 0.025361 | 0.621216 | 0.722437179 |
| GJA10       | 6q15     | 0.025357 | 0.62127  | 0.722458215 |
| CRISPLD2    | 16q24.1  | -0.02535 | 0.621308 | 0.722460097 |

|              |                |          |          |             |
|--------------|----------------|----------|----------|-------------|
| CTIF         | 18q21.1        | -0.02533 | 0.621574 | 0.722728267 |
| OR6C65       | 12q13.2        | -0.02532 | 0.621779 | 0.722843606 |
| RPL26        | 17p13.1        | 0.02532  | 0.621779 | 0.722843606 |
| ZMIZ1-AS1    | 10q22.3        | 0.02532  | 0.621782 | 0.722843606 |
| OAF          | 11q23.3        | 0.025298 | 0.622081 | 0.723078936 |
| NAA35        | 9q21.33        | 0.025296 | 0.622108 | 0.723078936 |
| GPR132       | 14q32.33       | -0.0253  | 0.622118 | 0.723078936 |
| MPP3         | 17q21.31       | 0.025295 | 0.622129 | 0.723078936 |
| OR2D3        | 11p15.4        | -0.02529 | 0.622188 | 0.72310634  |
| YY1          | 14q32.2        | 0.025279 | 0.622342 | 0.723243118 |
| ATG3         | 3q13.2         | 0.025274 | 0.622413 | 0.723283855 |
| KRTAP10-2    | 21q22.3        | 0.025259 | 0.622623 | 0.723485185 |
| ABHD16A      | 6p21.33        | 0.025243 | 0.622843 | 0.723681763 |
| KCNS3        | 2p24.2         | 0.025241 | 0.622864 | 0.723681763 |
| PDPR         | 16q22.1        | 0.025231 | 0.623007 | 0.723805213 |
| VHL          | 3p25.3         | 0.025228 | 0.62305  | 0.723813179 |
| TNKS2        | 10q23.32       | 0.025223 | 0.623108 | 0.723838422 |
| MATN4        | 20q13.12       | 0.025193 | 0.623528 | 0.724285176 |
| PIRT         | 17p12          | -0.02517 | 0.623795 | 0.724552896 |
| PADI4        | 1p36.13        | -0.02517 | 0.623863 | 0.7245896   |
| PARP8        | 5q11.1         | 0.025146 | 0.624179 | 0.724914881 |
| KPNA7        | 7q22.1         | -0.02514 | 0.624219 | 0.724919156 |
| SRPRA        | 11q24.2        | -0.02513 | 0.624357 | 0.725026671 |
| ZDHHC1       | 16q22.1        | 0.025131 | 0.624384 | 0.725026671 |
| SMC4         | 3q25.33        | 0.025127 | 0.624434 | 0.725043273 |
| EIF2B2       | 14q24.3        | 0.025116 | 0.624586 | 0.72517709  |
| LARP1        | 5q33.2         | 0.025097 | 0.62485  | 0.725441954 |
| LOC729609    | Xp22.12        | -0.02508 | 0.625024 | 0.725582006 |
| EMC7         | 15q14          | -0.02508 | 0.625043 | 0.725582006 |
| ATF5         | 19q13.33       | 0.025076 | 0.625141 | 0.725653756 |
| SLC30A8      | 8q24.11        | 0.025068 | 0.625248 | 0.725725211 |
| NLRP12       | 19q13.42       | -0.02507 | 0.625275 | 0.725725211 |
| SFI1         | 22q12.2        | 0.025057 | 0.6254   | 0.725827615 |
| CYFIP2       | 5q33.3         | 0.025051 | 0.625486 | 0.725885566 |
| TFAP2C       | 20q13.31       | -0.02505 | 0.62555  | 0.725917435 |
| HMG20A       | 15q24.3        | -0.02503 | 0.625721 | 0.726073892 |
| TAPBPL       | 12p13.31       | 0.02503  | 0.625771 | 0.726090455 |
| SUPV3L1      | 10q22.1        | 0.025016 | 0.625973 | 0.726282913 |
| RNF112       | 17p11.2        | 0.025012 | 0.626021 | 0.726284306 |
| VPS37C       | 11q12.2        | -0.02501 | 0.626051 | 0.726284306 |
| DCAF7        | 17q23.3        | -0.02501 | 0.626083 | 0.726284306 |
| FAM184B      | 4p15.32-p15.31 | -0.02498 | 0.626499 | 0.726724534 |
| TLR4         | 9q33.1         | -0.02497 | 0.626628 | 0.726831349 |
| C8ORF74      | 8p23.1         | 0.024948 | 0.626908 | 0.727114758 |
| KRTAP5-8     | 11q13.4        | -0.02493 | 0.627108 | 0.727304407 |
| SMG1P2       | 16p11.2        | -0.02492 | 0.627312 | 0.72747861  |
| SNORA52      | 11p15.5        | 0.024917 | 0.627331 | 0.72747861  |
| ATXN10       | 22q13.31       | -0.02488 | 0.627883 | 0.728076891 |
| HTR3D        | 3q27.1         | -0.02486 | 0.628133 | 0.72813733  |
| NF1P2        | 15q11.2        | 0.024855 | 0.62819  | 0.72813733  |
| LOC100287704 | 7q11.21        | 0.024855 | 0.62819  | 0.72813733  |
| OR52E6       | 11p15.4        | 0.024855 | 0.62819  | 0.72813733  |
| OR51B6       | 11p15.4        | 0.024855 | 0.62819  | 0.72813733  |
| POM121L12    | 7p12.1         | 0.024855 | 0.62819  | 0.72813733  |
| TNP1         | 2q35           | 0.024855 | 0.62819  | 0.72813733  |
| CCDC61       | 19q13.32       | 0.024848 | 0.628291 | 0.728212517 |
| RIT2         | 18q12.3        | -0.02484 | 0.628402 | 0.728298592 |
| SNORA38      | 6p21.33        | -0.02483 | 0.628601 | 0.728487356 |

|           |                 |          |          |             |
|-----------|-----------------|----------|----------|-------------|
| FOXR1     | 11q23.3         | 0.024816 | 0.628727 | 0.728591758 |
| NTN3      | 16p13.3         | -0.0248  | 0.628973 | 0.728834092 |
| ALPL      | 1p36.12         | -0.02476 | 0.629569 | 0.729482541 |
| ELFN2     | 22q13.1         | -0.02475 | 0.629668 | 0.729555241 |
| RBMS2     | 12q13.3         | -0.02473 | 0.629944 | 0.729833219 |
| ZNF408    | 11p11.2         | -0.02472 | 0.630061 | 0.729925682 |
| IARS      | 9q22.31         | -0.02471 | 0.630231 | 0.730071835 |
| DCTN1-AS1 | 2p13.1          | 0.024703 | 0.630293 | 0.730071835 |
| RBP5      | 12p13.31        | 0.024703 | 0.630296 | 0.730071835 |
| NKX2-1    | 14q13.3         | 0.024693 | 0.630432 | 0.730186902 |
| PIGQ      | 16p13.3         | -0.02469 | 0.630511 | 0.730236034 |
| TSC1      | 9q34.13         | -0.02468 | 0.630576 | 0.730269783 |
| MYO3B     | 2q31.1          | 0.024679 | 0.63063  | 0.730289041 |
| RAB20     | 13q34           | -0.02468 | 0.630681 | 0.730306198 |
| GAB3      | Xq28            | 0.024665 | 0.630821 | 0.730384052 |
| DGKH      | 13q14.11        | 0.024665 | 0.630821 | 0.730384052 |
| CTRC      | 1p36.21         | -0.02465 | 0.630976 | 0.73052086  |
| PRM2      | 16p13.13        | -0.02465 | 0.631066 | 0.730583517 |
| SCGB2A2   | 11q12.3         | -0.02464 | 0.631177 | 0.730669987 |
| UBALD2    | 17q25.1         | -0.02463 | 0.631277 | 0.7307435   |
| TRIM55    | 8q13.1          | 0.024626 | 0.631369 | 0.730784745 |
| LINC01300 | 8q24.3          | 0.024624 | 0.631386 | 0.730784745 |
| FARS2     | 6p25.1          | 0.024619 | 0.631462 | 0.730830907 |
| TMEM87B   | 2q13            | -0.0246  | 0.631716 | 0.731082221 |
| CDC6      | 17q21.2         | 0.024583 | 0.631964 | 0.731326647 |
| NKAIN3    | 8q12.3          | -0.02457 | 0.63217  | 0.731523099 |
| MUC7      | 4q13.3          | 0.024542 | 0.632524 | 0.731882505 |
| P2RX6     | 22q11.21        | 0.02454  | 0.632554 | 0.731882505 |
| HSFY2     | Yq11.222        | -0.02453 | 0.63266  | 0.731950457 |
| HAVCR1    | 5q33.3          | 0.024531 | 0.632689 | 0.731950457 |
| INIP      | 9q32            | -0.02453 | 0.632722 | 0.731950457 |
| ECH1      | 19q13.2         | 0.024522 | 0.632803 | 0.732001453 |
| PRKCD     | 3p21.1          | -0.02452 | 0.632865 | 0.732031721 |
| ZXDC      | 3q21.3          | 0.024506 | 0.63303  | 0.732150962 |
| NAP1L5    | 4q22.1 4q21-q22 | 0.024505 | 0.633042 | 0.732150962 |
| THOC1     | 18p11.32        | 0.024485 | 0.633323 | 0.732392825 |
| TPT1      | 13q14.13        | -0.02448 | 0.633358 | 0.732392825 |
| CTSL3P    | 9q21.33         | -0.02448 | 0.633361 | 0.732392825 |
| CT47A6    | Xq24            | 0.024474 | 0.633479 | 0.732486962 |
| CMAS      | 12p12.1         | 0.024459 | 0.633681 | 0.732678875 |
| C4ORF50   | 4p16.1          | 0.024455 | 0.63374  | 0.732704672 |
| ARL5B     | 10p12.31        | 0.024445 | 0.633881 | 0.732825766 |
| MAGEB4    | Xp21.2          | 0.024433 | 0.634042 | 0.732969092 |
| ARHGAP10  | 4q31.23         | 0.02443  | 0.634079 | 0.7329692   |
| POLDIP3   | 22q13.2         | 0.024402 | 0.634473 | 0.733383021 |
| PDE2A     | 11q13.4         | -0.02436 | 0.635119 | 0.734087296 |
| CCDC174   | 3p25.1          | -0.02435 | 0.635185 | 0.73409591  |
| TLE3      | 15q23           | -0.02435 | 0.6352   | 0.73409591  |
| ZNF836    | 19q13.41        | 0.024328 | 0.635508 | 0.734393102 |
| AFTPH     | 2p14            | -0.02433 | 0.635541 | 0.734393102 |
| TBC1D26   | 17p12           | -0.02432 | 0.635567 | 0.734393102 |
| ARHGAP42  | 11q22.1         | 0.024318 | 0.635646 | 0.734415044 |
| INPP4A    | 2q11.2          | -0.02431 | 0.635703 | 0.734415044 |
| PTGES3    | 12q13.3 12      | -0.02431 | 0.635726 | 0.734415044 |
| ODAPH     | 4q21.1          | 0.024311 | 0.635733 | 0.734415044 |
| PITX3     | 10q24.32        | 0.024291 | 0.636009 | 0.734691397 |
| CALB2     | 16q22.2         | -0.02428 | 0.636133 | 0.734792372 |
| C11ORF94  | 11p11.2         | 0.024278 | 0.636197 | 0.734794617 |



|              |          |          |          |             |
|--------------|----------|----------|----------|-------------|
| UTS2B        | 3q28     | 0.024277 | 0.636208 | 0.734794617 |
| RRAS2        | 11p15.2  | -0.02427 | 0.636298 | 0.734856222 |
| DCTN3        | 9p13.3   | -0.02423 | 0.636912 | 0.735522663 |
| SETD9        | 5q11.2   | 0.024219 | 0.637023 | 0.735564884 |
| DFFB         | 1p36.32  | 0.024216 | 0.637053 | 0.735564884 |
| RLF          | 1p34.2   | -0.02422 | 0.637059 | 0.735564884 |
| MAK          | 6p24.2   | 0.024205 | 0.637215 | 0.735703252 |
| ZBTB46       | 20q13.33 | 0.024201 | 0.637273 | 0.735727298 |
| ACOT6        | 14q24.3  | 0.024197 | 0.637318 | 0.735737611 |
| HAPLN4       | 19p13.11 | -0.02418 | 0.637542 | 0.735953739 |
| CHAT         | 10q11.23 | 0.024159 | 0.637855 | 0.736271593 |
| MAP1LC3B     | 16q24.2  | -0.02415 | 0.637921 | 0.736306387 |
| UTRN         | 6q24.2   | 0.02415  | 0.637972 | 0.736322751 |
| FOLR3        | 11q13.4  | -0.02414 | 0.638063 | 0.736384792 |
| BPGM         | 7q33     | -0.02414 | 0.638158 | 0.736421866 |
| PSRC1        | 1p13.3   | 0.024136 | 0.638173 | 0.736421866 |
| GPR68        | 14q32.11 | -0.02413 | 0.638206 | 0.736421866 |
| NCMAP        | 1p36.11  | -0.02413 | 0.638242 | 0.736421866 |
| DNAAF1       | 16q24.1  | 0.024118 | 0.638418 | 0.736543581 |
| BMPR1B       | 4q22.3   | 0.024116 | 0.638455 | 0.736543581 |
| SCNN1D       | 1p36.33  | -0.02412 | 0.638458 | 0.736543581 |
| MAX          | 14q23.3  | 0.024106 | 0.638584 | 0.7366464   |
| IDUA         | 4p16.3   | -0.0241  | 0.638737 | 0.736779931 |
| MMP1         | 11q22.2  | 0.02409  | 0.638818 | 0.736779931 |
| ACCSL        | 11p11.2  | 0.024089 | 0.638833 | 0.736779931 |
| LY86-AS1     | 6p25.1   | 0.024088 | 0.638847 | 0.736779931 |
| GABRG3       | 15q12    | 0.024083 | 0.638908 | 0.736808471 |
| LOC100271832 | 2p22.3   | -0.02408 | 0.638979 | 0.73684739  |
| SERPINC1     | 1q25.1   | 0.024074 | 0.639034 | 0.736868637 |
| CAMSAP1      | 9q34.3   | 0.024052 | 0.639342 | 0.737181883 |
| FAM170B      | 10q11.23 | -0.02404 | 0.639536 | 0.737362606 |
| PPP2R1B      | 11q23.1  | 0.024033 | 0.6396   | 0.737394427 |
| DDRKG1       | 20p13    | -0.02402 | 0.639729 | 0.737458545 |
| KIR2DS4      | 19q13.42 | 0.024024 | 0.63973  | 0.737458545 |
| LINC00410    | 13q31.3  | -0.02402 | 0.639802 | 0.737499599 |
| MAP7D3       | Xq26.3   | -0.024   | 0.640087 | 0.737784908 |
| GATA3        | 10p14    | 0.02399  | 0.640201 | 0.737873906 |
| CCER1        | 12q21.33 | 0.023969 | 0.640503 | 0.738180159 |
| OOSP2        | 11q12.1  | -0.02395 | 0.640782 | 0.738459036 |
| DLK2         | 6p21.1   | 0.02394  | 0.64091  | 0.738519436 |
| HSCB         | 22q12.1  | 0.023939 | 0.64091  | 0.738519436 |
| PTOV1        | 19q13.33 | -0.02394 | 0.640945 | 0.738519436 |
| PPP1R3A      | 7q31.1   | -0.02393 | 0.641029 | 0.738573897 |
| LINC01020    | 5p15.32  | -0.02393 | 0.641096 | 0.738608152 |
| TRAPPC6B     | 14q21.1  | 0.02392  | 0.641188 | 0.738672197 |
| TRAF6        | 11p12    | -0.02391 | 0.641365 | 0.738833826 |
| ODF3         | 11p15.5  | 0.023898 | 0.641487 | 0.738896285 |
| TTLL7        | 1p31.1   | 0.023896 | 0.641512 | 0.738896285 |
| SNORA2A      | 12q13.11 | 0.023895 | 0.64153  | 0.738896285 |
| GATM         | 15q21.1  | 0.02388  | 0.641733 | 0.739087634 |
| KMT2D        | 12q13.12 | 0.023856 | 0.642071 | 0.739376066 |
| TKTL1        | Xq28     | -0.02386 | 0.642084 | 0.739376066 |
| MATR3        | 5q31.2   | 0.023854 | 0.642101 | 0.739376066 |
| PROS1        | 3q11.1   | 0.023852 | 0.642132 | 0.739376066 |
| PRG3         | 11q12.1  | 0.023848 | 0.642186 | 0.739395921 |
| FARP2        | 2q37.3   | -0.02384 | 0.642288 | 0.739470962 |
| LINC00934    | 12q24.23 | -0.02384 | 0.642342 | 0.739490599 |
| APBB3        | 5q31.3   | -0.02383 | 0.642423 | 0.739541615 |

|           |                |          |          |             |
|-----------|----------------|----------|----------|-------------|
| LCE3C     | 1q21.3         | 0.023813 | 0.642672 | 0.739785431 |
| ATXN2     | 12q24.12       | -0.02381 | 0.642784 | 0.739871804 |
| TXN       | 9q31.3         | -0.02379 | 0.642979 | 0.740054199 |
| IL18BP    | 11q13.4        | -0.02379 | 0.643036 | 0.740069489 |
| LGI2      | 4p15.2         | -0.02379 | 0.643066 | 0.740069489 |
| C15ORF54  | 15q14          | -0.02377 | 0.643282 | 0.740275734 |
| GTF2H2B   | 5q13.2         | -0.02375 | 0.643581 | 0.740571697 |
| SLC23A3   | 2q35           | 0.023746 | 0.643614 | 0.740571697 |
| DGCR6     | 22q11.21 22q11 | -0.02374 | 0.643701 | 0.740593886 |
| GIN3      | 16q21          | -0.02374 | 0.643707 | 0.740593886 |
| SEBOX     | 17q11.2        | -0.02374 | 0.643765 | 0.74061816  |
| MYNN      | 3q26.2         | -0.02373 | 0.643833 | 0.740621104 |
| LOC642929 | 9q21.11        | -0.02373 | 0.643841 | 0.740621104 |
| MDH2      | 7q11.23        | -0.02372 | 0.643948 | 0.740700554 |
| USH1G     | 17q25.1        | -0.02371 | 0.644167 | 0.740910005 |
| SCYL3     | 1q24.2         | 0.023688 | 0.644417 | 0.741155326 |
| ZNF695    | 1q44           | -0.02367 | 0.644628 | 0.741355042 |
| MBL2      | 10q21.1        | 0.023646 | 0.645011 | 0.741715741 |
| KRTAP4-4  | 17q21.2        | -0.02365 | 0.645015 | 0.741715741 |
| AGFG1     | 2q36.3         | -0.02364 | 0.645109 | 0.741781152 |
| SNIP1     | 1p34.3         | 0.02363  | 0.645233 | 0.741880496 |
| MCAT      | 22q13.2        | 0.023625 | 0.645302 | 0.741917526 |
| COMMD8    | 4p12           | 0.023621 | 0.645359 | 0.741940709 |
| XKR4      | 8q12.1         | -0.02362 | 0.645406 | 0.741952097 |
| FZD4      | 11q14.2        | 0.023602 | 0.645627 | 0.742154591 |
| EVX1      | 7p15.2         | -0.0236  | 0.645689 | 0.742154591 |
| MLF1      | 3q25.32        | -0.0236  | 0.645693 | 0.742154591 |
| RADIL     | 7p22.1         | 0.023592 | 0.645763 | 0.742191632 |
| PRRT1     | 6p21.32        | 0.023588 | 0.645826 | 0.742221718 |
| SEC22A    | 3q21.1         | -0.02357 | 0.646049 | 0.74243529  |
| ABCG4     | 11q23.3        | -0.02357 | 0.64612  | 0.742467789 |
| B3GAT2    | 6q13           | -0.02356 | 0.646151 | 0.742467789 |
| TTLL5     | 14q24.3        | 0.023548 | 0.64638  | 0.742688288 |
| ANKRD30BL | 2q21.2         | -0.02354 | 0.646536 | 0.742824654 |
| SLC34A3   | 9q34.3         | -0.02352 | 0.64678  | 0.743062761 |
| LYPD4     | 19q13.2        | -0.02351 | 0.646978 | 0.743247255 |
| PIGV      | 1p36.11        | 0.023489 | 0.647203 | 0.743460879 |
| ZNF791    | 19p13.13       | 0.023486 | 0.647254 | 0.743460879 |
| MON1B     | 16q23.1        | -0.02348 | 0.647275 | 0.743460879 |
| ZNF417    | 19q13.43       | 0.023476 | 0.647384 | 0.743534888 |
| STEAP1B   | 7p15.3         | -0.02347 | 0.647414 | 0.743534888 |
| DEFB135   | 8p23.1         | -0.02346 | 0.64759  | 0.743694159 |
| GRTP1     | 13q34          | 0.023456 | 0.647667 | 0.743739388 |
| MRPS21    | 1q21.2         | 0.023453 | 0.647704 | 0.743739388 |
| HNRNPC    | 14q11.2        | 0.023432 | 0.648011 | 0.744049963 |
| MORF4     | 4q34.1         | 0.02342  | 0.648172 | 0.744192102 |
| TICAM2    | 5q22.3         | -0.02342 | 0.648234 | 0.74422099  |
| GPX8      | 5q11.2         | -0.0234  | 0.648394 | 0.744361817 |
| KCNE2     | 21q22.11       | 0.023388 | 0.648624 | 0.744562794 |
| AR        | Xq12           | -0.02339 | 0.648644 | 0.744562794 |
| BAIAP2-DT | 17q25.3        | -0.02338 | 0.648793 | 0.74469099  |
| USP45     | 6q16.2         | -0.02337 | 0.648925 | 0.744800714 |
| RGS22     | 8q22.2         | -0.02333 | 0.649473 | 0.745386429 |
| NKX1-2    | 10q26.13       | -0.02329 | 0.649936 | 0.745731629 |
| RBMY1A1   | Yq11.223       | 0.023294 | 0.649943 | 0.745731629 |
| AMY2A     | 1p21.1         | 0.023294 | 0.649946 | 0.745731629 |
| GUCY2EP   | 11q13.5        | -0.02329 | 0.649955 | 0.745731629 |
| PSG8      | 19q13.2        | 0.02329  | 0.649993 | 0.745731629 |

|               |          |          |          |             |
|---------------|----------|----------|----------|-------------|
| AGAP1         | 2q37.2   | 0.02329  | 0.649997 | 0.745731629 |
| DNAJB7        | 22q13.2  | -0.02328 | 0.650147 | 0.745860543 |
| PRAMEF1       | 1p36.21  | 0.023271 | 0.650266 | 0.745936082 |
| SYF2          | 1p36.11  | -0.02327 | 0.650287 | 0.745936082 |
| ADORA1        | 1q32.1   | 0.023264 | 0.650358 | 0.745956013 |
| LINC00515     | 21q21.3  | 0.023263 | 0.650379 | 0.745956013 |
| RGPD6         | 2q13     | 0.023255 | 0.650483 | 0.746033013 |
| PRSS57        | 19p13.3  | -0.02325 | 0.650567 | 0.746086688 |
| MIMT1         | 19q13.43 | 0.023241 | 0.650688 | 0.746182275 |
| ZNF410        | 14q24.3  | -0.02323 | 0.6509   | 0.746383073 |
| SERPINA13P    | 14q32.13 | 0.023185 | 0.651474 | 0.746966394 |
| AQP11         | 11q14.1  | 0.023184 | 0.651484 | 0.746966394 |
| SPRR2F        | 1q21.3   | -0.02318 | 0.651524 | 0.746970322 |
| MOBP          | 3p22.1   | 0.023167 | 0.651715 | 0.747146347 |
| ANKS1A        | 6p21.31  | -0.02316 | 0.651831 | 0.747236668 |
| MAP1LC3B2     | 12q24.22 | 0.023155 | 0.651889 | 0.747259749 |
| C3ORF22       | 3q21.3   | 0.023145 | 0.652037 | 0.747362758 |
| SLC11A1       | 2q35     | -0.02314 | 0.652061 | 0.747362758 |
| TNNI3K        | 1p31.1   | 0.023139 | 0.652121 | 0.747362758 |
| HDHD5-AS1     | 22q11.1  | -0.02314 | 0.652128 | 0.747362758 |
| SNORA10       | 16p13.3  | -0.0231  | 0.652717 | 0.747994885 |
| SAMD8         | 10q22.2  | 0.02309  | 0.652808 | 0.748040985 |
| C4ORF45       | 4q32.1   | 0.023088 | 0.652832 | 0.748040985 |
| LPAR6         | 13q14.2  | -0.02307 | 0.653086 | 0.74829012  |
| SCRN3         | 2q31.1   | -0.02305 | 0.653359 | 0.748559342 |
| SEMA6B        | 19p13.3  | 0.023047 | 0.653404 | 0.748568528 |
| STRADB        | 2q33.1   | 0.023033 | 0.653607 | 0.748758012 |
| TTY16         | Yp11.2   | -0.023   | 0.654111 | 0.749292263 |
| BIRC6         | 2p22.3   | 0.022977 | 0.654388 | 0.749567073 |
| CALN1         | 7q11.22  | -0.02296 | 0.654605 | 0.749772376 |
| LATS2         | 13q12.11 | 0.022941 | 0.654894 | 0.750060639 |
| TECTB         | 10q25.2  | 0.022925 | 0.655126 | 0.750283436 |
| CFAP54        | 12q23.1  | 0.022916 | 0.655246 | 0.750378045 |
| ABCA8         | 17q24.2  | 0.022912 | 0.655305 | 0.750402354 |
| ENPP1         | 6q23.2   | 0.022903 | 0.655427 | 0.750468662 |
| SNORA26       | 4q12     | -0.0229  | 0.655438 | 0.750468662 |
| TPGS1         | 19p13.3  | 0.0229   | 0.655482 | 0.750476312 |
| WBP11P1       | 18q12.1  | -0.02288 | 0.655712 | 0.750695893 |
| GSDMC         | 8q24.21  | 0.022881 | 0.655748 | 0.750695893 |
| CTXN3         | 5q23.2   | 0.022871 | 0.655886 | 0.750785667 |
| FAM168A       | 11q13.4  | 0.022869 | 0.655912 | 0.750785667 |
| TCEANC2       | 1p32.3   | 0.022867 | 0.655939 | 0.750785667 |
| TAX1BP1       | 7p15.2   | 0.022858 | 0.656073 | 0.750895413 |
| ST6GALNAC3    | 1p31.1   | 0.022842 | 0.656294 | 0.751105761 |
| DNAJC25-GNG10 | 9q31.3   | 0.022833 | 0.65642  | 0.751207034 |
| TMEM62        | 15q15.2  | 0.022819 | 0.656621 | 0.751394679 |
| SPEF1         | 20p13    | 0.022814 | 0.656682 | 0.751420579 |
| ZSWIM2        | 2q32.1   | 0.022811 | 0.656734 | 0.751437786 |
| SLC12A1       | 15q21.1  | -0.02279 | 0.657059 | 0.751766347 |
| ZNF876P       | 4p16.3   | -0.02277 | 0.657293 | 0.751991803 |
| PTPRU         | 1p35.3   | 0.022768 | 0.657334 | 0.751995489 |
| PRB2          | 12p13.2  | 0.022761 | 0.657435 | 0.752068331 |
| SLC7A9        | 19q13.11 | -0.02274 | 0.65776  | 0.752396507 |
| ZNF684        | 1p34.2   | 0.022734 | 0.657815 | 0.752416704 |
| CRKL          | 22q11.21 | -0.02273 | 0.657932 | 0.752507386 |
| HSP90B3P      | 1p22.1   | 0.022696 | 0.658354 | 0.752946891 |
| KLHL9         | 9p21.3   | -0.02265 | 0.658958 | 0.753587432 |
| OR2T4         | 1q44     | -0.02265 | 0.658989 | 0.753587432 |

|             |               |          |          |             |
|-------------|---------------|----------|----------|-------------|
| NUTM2G      | 9q22.33       | -0.02264 | 0.659085 | 0.753653811 |
| SOX3        | Xq27.1        | -0.02263 | 0.659274 | 0.753827012 |
| EIF4EBP2    | 10q22.1       | 0.022627 | 0.65932  | 0.753836039 |
| ABCB5       | 7p21.1        | -0.02261 | 0.659496 | 0.753994274 |
| RAB3D       | 19p13.2       | 0.022612 | 0.659538 | 0.754000008 |
| ZFAND2B     | 2q35          | -0.0226  | 0.65966  | 0.754095883 |
| ARRDC1-AS1  | 9q34.3        | -0.0226  | 0.659727 | 0.754129243 |
| LHB         | 19q13.33      | -0.02258 | 0.659987 | 0.754383895 |
| ZBTB18      | 1q44          | 0.022571 | 0.660119 | 0.754491172 |
| TNNT2       | 1q32.1        | -0.02256 | 0.660209 | 0.754551641 |
| PAF1        | 19q13.2       | 0.022555 | 0.66034  | 0.754658604 |
| GAPVD1      | 9q33.3        | 0.022544 | 0.660502 | 0.754784351 |
| RALB        | 2q14.2        | -0.02254 | 0.660526 | 0.754784351 |
| CRHR2       | 7p14.3        | -0.02253 | 0.66068  | 0.754905231 |
| SCARF1      | 17p13.3       | 0.022528 | 0.660723 | 0.754905231 |
| MCM6        | 2q21.3        | -0.02253 | 0.660745 | 0.754905231 |
| RWDD2A      | 6q14.1        | -0.02252 | 0.660845 | 0.754976782 |
| DNAH3       | 16p12.3       | 0.022492 | 0.661225 | 0.755367901 |
| TBC1D23     | 3q12.1-q12.2  | 0.022486 | 0.661313 | 0.755425555 |
| SELENON     | 1p36.11       | -0.02248 | 0.661365 | 0.755436648 |
| ZHX1        | 8q24.13       | 0.02248  | 0.661398 | 0.755436648 |
| KLRG1       | 12p13.31      | 0.022451 | 0.661811 | 0.755864217 |
| FASTKD1     | 2q31.1        | 0.022439 | 0.661976 | 0.755952563 |
| OCM         | 7p22.1        | -0.02244 | 0.662001 | 0.755952563 |
| ASB11       | Xp22.2        | 0.022437 | 0.662001 | 0.755952563 |
| UNC119B     | 12q24.31      | 0.022434 | 0.662046 | 0.755961107 |
| TCF12       | 15q21.3       | 0.022413 | 0.662341 | 0.756254996 |
| KIF4A       | Xq13.1        | -0.02241 | 0.662448 | 0.756310868 |
| CABS1       | 4q13.3        | -0.0224  | 0.662466 | 0.756310868 |
| LRRC10      | 12q15         | 0.022399 | 0.662541 | 0.756353383 |
| SMC1A       | Xp11.22       | 0.022392 | 0.662649 | 0.756355806 |
| GPNMB       | 7p15.3        | -0.02239 | 0.662682 | 0.756355806 |
| LILRA2      | 19q13.42      | 0.022389 | 0.662684 | 0.756355806 |
| FOXB1       | 15q22.2       | -0.02239 | 0.662694 | 0.756355806 |
| LIPC        | 15q21.3       | -0.02239 | 0.662739 | 0.756363662 |
| ULK3        | 15q24.1       | 0.022376 | 0.662862 | 0.756419096 |
| PRO0628     | 20q12         | -0.02238 | 0.662863 | 0.756419096 |
| RNF222      | 17p13.1       | 0.022371 | 0.662934 | 0.756457478 |
| AASS        | 7q31.32       | 0.022359 | 0.663108 | 0.756565682 |
| PREX1       | 20q13.13      | -0.02236 | 0.663142 | 0.756565682 |
| LCE2C       | 1q21.3        | 0.022357 | 0.663142 | 0.756565682 |
| KCNIP4      | 4p15.31-p15.2 | 0.022352 | 0.663212 | 0.756584522 |
| C6ORF141    | 6p12.3        | -0.02235 | 0.663261 | 0.756584522 |
| JPH4        | 14q11.2       | 0.022347 | 0.663272 | 0.756584522 |
| SLC26A4-AS1 | 7q22.3        | -0.02233 | 0.663465 | 0.756740465 |
| SHISA3      | 4p13          | 0.022332 | 0.663485 | 0.756740465 |
| IRGC        | 19q13.31      | 0.022327 | 0.66356  | 0.756783887 |
| ROBO4       | 11q24.2       | -0.02232 | 0.66373  | 0.75693374  |
| MRGPRX4     | 11p15.1       | 0.022303 | 0.663905 | 0.757053109 |
| PRSS58      | 7q34          | 0.0223   | 0.663938 | 0.757053109 |
| TCF23       | 2p23.3        | 0.0223   | 0.663948 | 0.757053109 |
| GLB1L3      | 11q25         | -0.0223  | 0.663997 | 0.75705422  |
| ATXN3L      | Xp22.2        | 0.022294 | 0.664033 | 0.75705422  |
| MSR1        | 8p22          | 0.02229  | 0.664083 | 0.75705422  |
| APOBEC3G    | 22q13.1       | -0.02229 | 0.664112 | 0.75705422  |
| OR13G1      | 1q44          | 0.022286 | 0.664138 | 0.75705422  |
| EIF4E2      | 2q37.1        | -0.02228 | 0.664205 | 0.757087621 |
| SCYL1       | 11q13.1       | -0.02227 | 0.664327 | 0.75713055  |

|             |          |          |          |             |
|-------------|----------|----------|----------|-------------|
| ALOX12      | 17p13.1  | 0.022269 | 0.66438  | 0.75713055  |
| ASB2        | 14q32.12 | -0.02227 | 0.664392 | 0.75713055  |
| C12ORF75    | 12q23.3  | 0.022268 | 0.664394 | 0.75713055  |
| SLC12A7     | 5p15.33  | -0.02226 | 0.664534 | 0.757247177 |
| BRD3        | 9q34.2   | -0.02225 | 0.66472  | 0.757393231 |
| LRRN2       | 1q32.1   | -0.02224 | 0.664753 | 0.757393231 |
| RETN        | 19p13.2  | 0.022241 | 0.664775 | 0.757393231 |
| C6ORF203    | 6q21     | 0.022234 | 0.664878 | 0.757437769 |
| CCL15-CCL14 | 17q12    | 0.022233 | 0.66489  | 0.757437769 |
| EMC3        | 3p25.3   | 0.022226 | 0.664988 | 0.757505973 |
| SLC25A10    | 17q25.3  | -0.02222 | 0.665061 | 0.757546209 |
| C16ORF78    | 16q12.1  | -0.02222 | 0.66511  | 0.757558905 |
| RWDD2B      | 21q21.3  | 0.022197 | 0.665396 | 0.757841933 |
| MYL5        | 4p16.3   | -0.02217 | 0.66582  | 0.758281484 |
| TBC1D3G     | 17q12    | -0.02214 | 0.66617  | 0.758637333 |
| RUSC1-AS1   | 1q22     | -0.02213 | 0.66632  | 0.758764797 |
| CDCA7L      | 7p15.3   | -0.02212 | 0.666476 | 0.758898795 |
| SMARCA5     | 4q31.21  | 0.022116 | 0.666543 | 0.758916702 |
| GTPBP8      | 3q13.2   | -0.02211 | 0.666567 | 0.758916702 |
| TACO1       | 17q23.3  | -0.0221  | 0.66675  | 0.75907207  |
| GPR84       | 12q13.13 | -0.0221  | 0.666804 | 0.75907207  |
| MICOS10     | 1p36.13  | 0.022097 | 0.666818 | 0.75907207  |
| ZNF589      | 3p21.31  | -0.02209 | 0.666882 | 0.759081562 |
| RAD54L2     | 3p21.2   | 0.02209  | 0.666915 | 0.759081562 |
| C16ORF58    | 16p11.2  | -0.02209 | 0.66694  | 0.759081562 |
| PARP12      | 7q34     | 0.022085 | 0.666991 | 0.759097461 |
| PTPN9       | 15q24.2  | -0.02207 | 0.667156 | 0.759241852 |
| PRR25       | 16p13.3  | -0.02205 | 0.667485 | 0.759563895 |
| SLC13A2     | 17q11.2  | 0.022047 | 0.667528 | 0.759563895 |
| TMX3        | 18q22.1  | 0.022045 | 0.667553 | 0.759563895 |
| OR3A1       | 17p13.3  | -0.02203 | 0.667812 | 0.759811005 |
| CCDC157     | 22q12.2  | -0.02202 | 0.667846 | 0.759811005 |
| VAV1        | 19p13.3  | 0.02202  | 0.66791  | 0.75984078  |
| NCAPG2      | 7q36.3   | 0.022007 | 0.668096 | 0.759997579 |
| UHRF1BP1    | 6p21.31  | 0.022005 | 0.668124 | 0.759997579 |
| SPAAR       | 9p13.3   | 0.022001 | 0.668174 | 0.760011664 |
| RP1L1       | 8p23.1   | -0.02197 | 0.668632 | 0.760489674 |
| KIF9        | 3p21.31  | 0.021946 | 0.668955 | 0.760812903 |
| KRTAP11-1   | 21q22.11 | -0.02193 | 0.669244 | 0.761098392 |
| STEAP2      | 7q21.13  | 0.021921 | 0.669321 | 0.761143425 |
| FAM173A     | 16p13.3  | 0.021887 | 0.669798 | 0.761632206 |
| IMPG1       | 6q14.1   | 0.021885 | 0.669827 | 0.761632206 |
| CD24        | 6q21     | -0.02187 | 0.669991 | 0.761774773 |
| ASCL4       | 12q23.3  | -0.02185 | 0.67036  | 0.762124442 |
| ATN1        | 12p13.31 | -0.02185 | 0.670374 | 0.762124442 |
| TRUB1       | 10q25.3  | -0.02183 | 0.670602 | 0.762340156 |
| SNORA21     | 17q12    | -0.02182 | 0.670782 | 0.762502035 |
| LOC643387   | 2q37.3   | 0.021811 | 0.670873 | 0.762561229 |
| SORCS1      | 10q25.1  | 0.021807 | 0.670928 | 0.762580919 |
| BMP6        | 6p24.3   | -0.0218  | 0.670978 | 0.762594619 |
| MFSD2B      | 2p23.3   | -0.02177 | 0.671388 | 0.762977352 |
| ZDHHC18     | 1p36.11  | -0.02177 | 0.671391 | 0.762977352 |
| STAG3L1     | 7q11.23  | -0.02176 | 0.67159  | 0.76312159  |
| PDILT       | 16p12.3  | 0.02176  | 0.671594 | 0.76312159  |
| LOC440896   | 9p11.2   | 0.021752 | 0.671718 | 0.763218453 |
| BLOC1S2     | 10q24.31 | 0.021747 | 0.671789 | 0.763256115 |
| PIM2        | Xp11.23  | 0.021737 | 0.671924 | 0.763365783 |
| CYP2E1      | 10q26.3  | -0.02172 | 0.672099 | 0.763522198 |

|            |                 |          |          |             |
|------------|-----------------|----------|----------|-------------|
| ANKRD20A9P | 13q11           | 0.021712 | 0.672277 | 0.763680694 |
| ECE1       | 1p36.12         | 0.021699 | 0.672471 | 0.763858204 |
| LINC00895  | 22q11.21        | 0.021695 | 0.672529 | 0.763880569 |
| LOR        | 1q21.3          | -0.02168 | 0.672748 | 0.764085217 |
| ZNF524     | 19q13.42        | 0.021665 | 0.672955 | 0.764277624 |
| LINC00161  | 21q21.3         | -0.02166 | 0.673093 | 0.764391214 |
| OR51S1     | 11p15.4         | -0.02163 | 0.673438 | 0.764739251 |
| TNFSF11    | 13q14.11        | -0.02161 | 0.673758 | 0.765054547 |
| SARM1      | 17q11.2         | 0.021604 | 0.673825 | 0.765054547 |
| KRTAP21-2  | 21q22.11        | 0.021603 | 0.67383  | 0.765054547 |
| KRTAP5-3   | 11p15.5         | -0.02156 | 0.674431 | 0.765693241 |
| POU5F1     | 6p21.33         | -0.02155 | 0.674585 | 0.765824532 |
| CRYGD      | 2q33.3          | 0.021508 | 0.675185 | 0.766462418 |
| DIRC3      | 2q35            | -0.0215  | 0.675307 | 0.766557294 |
| RMST       | 12q23.1 12q21   | 0.021486 | 0.675501 | 0.766734133 |
| PEBP4      | 8p21.3          | -0.02146 | 0.675823 | 0.767056798 |
| PRIMPOL    | 4q35.1          | 0.021457 | 0.675919 | 0.767079536 |
| ATP6V1E1   | 22q11.21        | -0.02146 | 0.675922 | 0.767079536 |
| LILRB3     | 19q13.42        | 0.021454 | 0.675958 | 0.767079536 |
| CAMP       | 3p21.31         | 0.021432 | 0.676275 | 0.767382561 |
| SUPT20HL1  | Xp22.11         | 0.02143  | 0.676302 | 0.767382561 |
| OR51F1     | 11p15.4         | 0.021423 | 0.676403 | 0.767431329 |
| NMT2       | 10p13           | -0.02142 | 0.676455 | 0.767431329 |
| SPATA32    | 17q21.31        | -0.02142 | 0.676476 | 0.767431329 |
| GTF2I      | 7q11.23         | -0.02142 | 0.676498 | 0.767431329 |
| SRPRB      | 3q22.1          | -0.02141 | 0.676557 | 0.76745399  |
| SPTA1      | 1q23.1          | -0.0214  | 0.676786 | 0.767670857 |
| PCDHA5     | 5q31.3          | -0.02139 | 0.676928 | 0.767689581 |
| SIAH2      | 3q25.1          | 0.021386 | 0.676931 | 0.767689581 |
| BMP3       | 4q21.21         | 0.021384 | 0.67695  | 0.767689581 |
| KCTD13     | 16p11.2         | 0.021383 | 0.676974 | 0.767689581 |
| PLA2G2C    | 1p36.12         | 0.021381 | 0.676994 | 0.767689581 |
| PSMD8      | 19q13.2         | -0.02136 | 0.677299 | 0.767991961 |
| HECW2      | 2q32.3          | 0.021356 | 0.677345 | 0.768000688 |
| RAX2       | 19p13.3         | -0.02134 | 0.677521 | 0.768155783 |
| BAD        | 11q13.1         | 0.021326 | 0.677778 | 0.768404496 |
| MMP3       | 11q22.2         | -0.02132 | 0.677923 | 0.768524586 |
| LINC00926  | 15q21.3         | -0.02131 | 0.677984 | 0.768550723 |
| LOC399815  | 10q26.13        | -0.02129 | 0.678287 | 0.768851166 |
| OR52H1     | 11p15.4         | 0.021285 | 0.678358 | 0.768888126 |
| HPN-AS1    | 19q13.11-q13.12 | -0.02128 | 0.67844  | 0.768936969 |
| SMNDC1     | 10q25.2         | -0.02127 | 0.678552 | 0.769020697 |
| PRRC2A     | 6p21.33         | -0.02126 | 0.67866  | 0.769099024 |
| POLE2      | 14q21.3         | -0.02125 | 0.678813 | 0.76922957  |
| ZCCHC9     | 5q14.1          | -0.02124 | 0.679004 | 0.769387696 |
| PNMA3      | Xq28            | -0.02124 | 0.67903  | 0.769387696 |
| DDX3Y      | Yq11.221        | 0.021233 | 0.679106 | 0.769430913 |
| COA7       | 1p32.3          | 0.021216 | 0.679354 | 0.769668196 |
| SLC22A8    | 11q12.3         | 0.021204 | 0.679516 | 0.769786534 |
| KCND1      | Xp11.23         | 0.021203 | 0.679535 | 0.769786534 |
| TRIAP1     | 12q24.31        | -0.0212  | 0.679578 | 0.769791735 |
| GOLIM4     | 3q26.2          | -0.02119 | 0.679729 | 0.769918792 |
| CCDC40     | 17q25.3         | 0.021178 | 0.679895 | 0.770063257 |
| NTPCR      | 1q42.2          | 0.021159 | 0.680159 | 0.770319148 |
| IZUMO4     | 19p13.3         | 0.021151 | 0.680282 | 0.77041487  |
| SRPX       | Xp11.4          | -0.02114 | 0.680381 | 0.770482732 |
| OR5AC2     | 3q11.2          | 0.021139 | 0.680454 | 0.77052212  |
| CCL16      | 17q12           | -0.02112 | 0.680677 | 0.770730872 |

|                  |                |          |          |             |
|------------------|----------------|----------|----------|-------------|
| RASSF2           | 20p13          | 0.021112 | 0.680833 | 0.770858536 |
| SSX5             | Xp11.23        | 0.021107 | 0.680903 | 0.770858536 |
| COA6             | 1q42.2         | -0.02111 | 0.680907 | 0.770858536 |
| DEAF1            | 11p15.5        | 0.021104 | 0.680944 | 0.770858536 |
| PPP1R17          | 7p14.3         | -0.02109 | 0.681098 | 0.770954739 |
| RGSL1            | 1q25.3         | -0.02109 | 0.681106 | 0.770954739 |
| MAP2K2           | 19p13.3        | 0.021086 | 0.681211 | 0.771030749 |
| SLC35B1          | 17q21.33       | -0.02108 | 0.681331 | 0.77112297  |
| TMEM94           | 17q25.1        | 0.021066 | 0.681491 | 0.771260457 |
| DPAGT1           | 11q23.3        | 0.021062 | 0.68155  | 0.771283034 |
| DIPK1C           | 18q22.3        | 0.021046 | 0.681772 | 0.771491371 |
| SAA4             | 11p15.1        | 0.021028 | 0.68204  | 0.771728424 |
| CNOT3            | 19q13.42       | -0.02102 | 0.682088 | 0.771728424 |
| SPDYE1           | 7p13           | -0.02102 | 0.682131 | 0.771728424 |
| KLHL34           | Xp22.12        | -0.02102 | 0.682136 | 0.771728424 |
| NRADDP           | 3p21.31        | 0.021011 | 0.682272 | 0.771839137 |
| PRRT4            | 7q32.1         | -0.021   | 0.682402 | 0.771912783 |
| F2RL3            | 19p13.11       | -0.021   | 0.682415 | 0.771912783 |
| UQCRQ            | 5q31.1         | 0.020997 | 0.682485 | 0.771949273 |
| LYPLA2P1         | 6p21.32        | -0.02098 | 0.682676 | 0.772121567 |
| SMIM24           | 19p13.3        | 0.020974 | 0.682806 | 0.772186462 |
| CYP1B1           | 2p22.2         | -0.02097 | 0.682861 | 0.772186462 |
| ANKRD20A20P      | 9q13           | 0.020969 | 0.68288  | 0.772186462 |
| TBC1D3P1-DHX40P1 | 17q23.1        | 0.020968 | 0.682888 | 0.772186462 |
| PERM1            | 1p36.33        | -0.02094 | 0.68324  | 0.772509266 |
| LOC284441        | 19p12          | 0.020942 | 0.683271 | 0.772509266 |
| GPN2             | 1p36.11        | 0.02094  | 0.683289 | 0.772509266 |
| HIST1H2BI        | 6p22.2         | -0.02093 | 0.683488 | 0.772690335 |
| HJURP            | 2q37.1         | -0.02092 | 0.683539 | 0.772704092 |
| POM121L8P        | 22q11.21       | -0.02092 | 0.683599 | 0.772728356 |
| KBTBD4           | 11p11.2        | 0.020896 | 0.683924 | 0.773052138 |
| ALK              | 2p23.2-p23.1   | -0.02088 | 0.684128 | 0.773239102 |
| DNAH8            | 6p21.2         | 0.020865 | 0.684371 | 0.773470669 |
| NPAT             | 11q22.3        | -0.02086 | 0.684438 | 0.773502832 |
| NEDD1            | 12q23.1        | -0.02085 | 0.684571 | 0.773586195 |
| ZNF827           | 4q31.21-q31.22 | -0.02085 | 0.684589 | 0.773586195 |
| TUBBP6           | 7p11.2         | -0.02084 | 0.684658 | 0.773620233 |
| FAM49A           | 2p24.2         | 0.020841 | 0.684716 | 0.773641673 |
| EIF1AY           | Yq11.223       | 0.020823 | 0.68497  | 0.773885235 |
| HOXC13           | 12q13.13       | -0.02082 | 0.685034 | 0.773914367 |
| NRTN             | 19p13.3        | -0.0208  | 0.685252 | 0.774116743 |
| SCAPER           | 15q24.3        | -0.0208  | 0.685332 | 0.774163636 |
| ZBTB16           | 11q23.2        | 0.020778 | 0.685607 | 0.774430502 |
| FPR1             | 19q13.41       | 0.020769 | 0.685736 | 0.774532592 |
| UBE2L3           | 22q11.21       | 0.020763 | 0.685835 | 0.774600379 |
| RANBP9           | 6p23           | 0.020758 | 0.685906 | 0.774602766 |
| FOXP2            | 7q31.1         | 0.020757 | 0.685914 | 0.774602766 |
| PRPH             | 12q13.12       | 0.020753 | 0.685971 | 0.774622911 |
| OR4F21           | 8p23.3         | -0.02075 | 0.686012 | 0.774625878 |
| MYOT             | 5q31.2         | -0.02073 | 0.68636  | 0.774975482 |
| ZAN              | 7q22.1         | 0.020723 | 0.686402 | 0.77497909  |
| PSMB11           | 14q11.2        | -0.02068 | 0.687063 | 0.775542705 |
| FBXO47           | 17q12 17q12    | -0.02067 | 0.687092 | 0.775542705 |
| P2RX6P           | 22q11.21       | 0.020674 | 0.687103 | 0.775542705 |
| HIST1H2AL        | 6p22.1         | -0.02067 | 0.687119 | 0.775542705 |
| C9ORF85          | 9q21.13        | 0.020673 | 0.687124 | 0.775542705 |
| IQUB             | 7q31.32        | 0.020672 | 0.687134 | 0.775542705 |
| SLC5A2           | 16p11.2        | 0.020666 | 0.687217 | 0.775592427 |

|            |               |          |          |             |
|------------|---------------|----------|----------|-------------|
| FAM207A    | 21q22.3       | 0.020663 | 0.687263 | 0.775601473 |
| OR4M2      | 15q11.2       | 0.020633 | 0.687698 | 0.776048767 |
| LRGUK      | 7q33          | 0.020628 | 0.687761 | 0.77607547  |
| LRRC27     | 10q26.3       | -0.02061 | 0.68797  | 0.776268095 |
| SYNE1      | 6q25.2        | 0.020602 | 0.688131 | 0.776405535 |
| HECTD4     | 12q24.13      | 0.020587 | 0.688356 | 0.776616149 |
| MRGPRE     | 11p15.4       | 0.020571 | 0.688583 | 0.776800435 |
| PML        | 15q24.1       | 0.02057  | 0.688597 | 0.776800435 |
| TOR1A      | 9q34.11       | -0.02053 | 0.689169 | 0.777387122 |
| OR2C1      | 16p13.3       | -0.02053 | 0.689196 | 0.777387122 |
| CYP11A1    | 15q24.1       | -0.02052 | 0.689261 | 0.777387122 |
| C1ORF158   | 1p36.21       | -0.02052 | 0.689273 | 0.777387122 |
| SLC25A51P4 | 11p15.1       | -0.02052 | 0.689332 | 0.777409871 |
| PRAMEF18   | 1p36.21       | -0.02051 | 0.689449 | 0.777498993 |
| CLDND2     | 19q13.41      | -0.02048 | 0.689845 | 0.777865114 |
| SLX4       | 16p13.3       | 0.020482 | 0.689852 | 0.777865114 |
| SKP1       | 5q31.1        | 0.020474 | 0.689969 | 0.77795376  |
| FCN1       | 9q34.3        | -0.02047 | 0.690072 | 0.778026323 |
| SHE        | 1q21.3        | 0.02046  | 0.69017  | 0.778092708 |
| LINC01734  | 20q12         | -0.02045 | 0.690312 | 0.778208712 |
| SFT2D1     | 6q27          | 0.020443 | 0.690418 | 0.77828393  |
| OR6T1      | 11q24.1       | -0.02044 | 0.6905   | 0.778332577 |
| COLEC12    | 18p11.32      | -0.02043 | 0.690575 | 0.77837407  |
| MRTFB      | 16p13.12      | -0.02042 | 0.690801 | 0.778584695 |
| MYADML     | 2p22.3        | 0.020394 | 0.691128 | 0.778908874 |
| MIEF1      | 22q13.1       | 0.020389 | 0.691197 | 0.778943219 |
| WDR24      | 16p13.3       | -0.02038 | 0.691277 | 0.778960132 |
| SENP7      | 3q12.3        | -0.02038 | 0.69129  | 0.778960132 |
| ZNF230     | 19q13.31      | 0.020366 | 0.691531 | 0.77914872  |
| SCN10A     | 3p22.2        | -0.02037 | 0.691535 | 0.77914872  |
| RTN1       | 14q23.1       | 0.020359 | 0.691621 | 0.779176849 |
| LRRD1      | 7q21.2        | -0.02036 | 0.691638 | 0.779176849 |
| C2ORF50    | 2p25.1        | -0.02035 | 0.691824 | 0.779306956 |
| CCDC38     | 12q23.1       | -0.02034 | 0.691848 | 0.779306956 |
| PCNX3      | 11q13.1       | -0.02034 | 0.691902 | 0.779306956 |
| LINC00705  | 10p15.1       | 0.020339 | 0.691909 | 0.779306956 |
| TMEM52     | 1p36.33       | -0.02031 | 0.692394 | 0.779810005 |
| DAOA       | 13q33.2 13q34 | -0.0203  | 0.69249  | 0.779873712 |
| LRRC58     | 3q13.33       | -0.02029 | 0.692605 | 0.779959341 |
| F13B       | 1q31.3        | 0.020281 | 0.692753 | 0.780025905 |
| ZBTB8OS    | 1p35.1        | -0.02028 | 0.692815 | 0.780025905 |
| SMG1       | 16p12.3       | -0.02028 | 0.692822 | 0.780025905 |
| GPR37L1    | 1q32.1        | -0.02027 | 0.692837 | 0.780025905 |
| CEP120     | 5q23.2        | -0.02027 | 0.692859 | 0.780025905 |
| TONSL      | 8q24.3        | -0.02026 | 0.693082 | 0.780233014 |
| MBD3L5     | 19p13.2       | 0.020245 | 0.69326  | 0.780389958 |
| SULT1C4    | 2q12.3        | -0.02023 | 0.693419 | 0.780484858 |
| COG3       | 13q14.13      | 0.020234 | 0.693422 | 0.780484858 |
| ANKRD2     | 10q24.2       | -0.02022 | 0.693623 | 0.780667299 |
| GAA        | 17q25.3       | 0.020217 | 0.693667 | 0.780672499 |
| AVPR1A     | 12q14.2       | 0.020202 | 0.693887 | 0.780826716 |
| DHX16      | 6p21.33       | 0.020201 | 0.693899 | 0.780826716 |
| ZBTB14     | 18p11.31      | 0.020199 | 0.693921 | 0.780826716 |
| IL17B      | 5q32          | -0.02019 | 0.694017 | 0.780891444 |
| LPAR3      | 1p22.3        | -0.02019 | 0.694061 | 0.780896253 |
| OACYLP     | 18q21.32      | 0.020181 | 0.69418  | 0.780986899 |
| PLD6       | 17p11.2       | -0.02018 | 0.694228 | 0.780996302 |
| SH3BP5     | 3p25.1        | 0.020154 | 0.694578 | 0.781346306 |



|           |            |          |          |             |
|-----------|------------|----------|----------|-------------|
| NPC1      | 18q11.2    | 0.020144 | 0.69472  | 0.781443279 |
| SARS2     | 19q13.2    | 0.020142 | 0.694742 | 0.781443279 |
| ARHGDI1A  | 17q25.3    | 0.020135 | 0.694841 | 0.781510936 |
| KCNS2     | 8q22.2     | 0.020108 | 0.695242 | 0.781893749 |
| ZFP3      | 17p13.2    | -0.02011 | 0.69526  | 0.781893749 |
| UTP11     | 1p34.3     | -0.0201  | 0.695315 | 0.781907036 |
| SLC35E3   | 12q15      | 0.0201   | 0.695349 | 0.781907036 |
| SVPE1     | 9q31.3     | -0.02008 | 0.695638 | 0.782187337 |
| PTPN6     | 12p13.31   | -0.02007 | 0.695771 | 0.782293331 |
| PRSS36    | 16p11.2    | 0.020053 | 0.696035 | 0.782545758 |
| SLC7A1    | 13q12.3    | -0.02004 | 0.696165 | 0.782648265 |
| C6ORF47   | 6p21.33    | 0.020038 | 0.696243 | 0.782680669 |
| HOXA13    | 7p15.2     | 0.020036 | 0.696272 | 0.782680669 |
| GUCY2F    | Xq22.3-q23 | 0.02003  | 0.69636  | 0.782735733 |
| OR5P2     | 11p15.4    | 0.019994 | 0.696878 | 0.783245517 |
| MGARP     | 4q31.1     | 0.019993 | 0.696892 | 0.783245517 |
| PLA2G6    | 22q13.1    | -0.01998 | 0.697027 | 0.783353938 |
| CXCR2     | 2q35       | -0.01996 | 0.697303 | 0.78362025  |
| TSSK1B    | 5q22.2     | 0.01996  | 0.697375 | 0.78365636  |
| ABHD14A   | 3p21.2     | 0.01994  | 0.697657 | 0.783929959 |
| APOL5     | 22q12.3    | 0.019933 | 0.697755 | 0.783937515 |
| RING1     | 6p21.32    | -0.01993 | 0.697772 | 0.783937515 |
| LRRC4B    | 19q13.33   | -0.01993 | 0.697782 | 0.783937515 |
| SLC27A5   | 19q13.43   | -0.01992 | 0.697927 | 0.78405744  |
| MAT1A     | 10q22.3    | -0.01992 | 0.698007 | 0.784103157 |
| SORL1     | 11q24.1    | -0.0199  | 0.698253 | 0.78433565  |
| OR52B4    | 11p15.4    | 0.019892 | 0.698342 | 0.784379622 |
| BIRC8     | 19q13.42   | -0.01989 | 0.698371 | 0.784379622 |
| UHRF1BP1L | 12q23.1    | -0.01987 | 0.698648 | 0.784609695 |
| DGCR10    | 22q11.21   | 0.019871 | 0.698654 | 0.784609695 |
| LDHAL6A   | 11p15.1    | -0.01983 | 0.699199 | 0.785177501 |
| IER2      | 19p13.13   | -0.01982 | 0.699343 | 0.785295857 |
| C18ORF21  | 18q12.2    | -0.01982 | 0.699409 | 0.785325081 |
| HECTD2    | 10q23.32   | -0.01981 | 0.699514 | 0.785399651 |
| CTNND2    | 5p15.2     | 0.019802 | 0.699648 | 0.78549429  |
| HNRNPCL2  | 1p36.21    | -0.0198  | 0.699711 | 0.78549429  |
| SPDYE6    | 7q22.1     | -0.0198  | 0.699716 | 0.78549429  |
| RFPL4B    | 6q21       | -0.01977 | 0.70016  | 0.785948492 |
| OR51G1    | 11p15.4    | 0.019745 | 0.700472 | 0.786210303 |
| C11ORF40  | 11p15.4    | -0.01974 | 0.700472 | 0.786210303 |
| OR7A10    | 19p13.12   | -0.01973 | 0.700679 | 0.786399096 |
| TMEM88    | 17p13.1    | -0.01973 | 0.700731 | 0.786413018 |
| CYB561D1  | 1p13.3     | -0.01972 | 0.70086  | 0.786513756 |
| UBE2N     | 12q22      | -0.01971 | 0.700919 | 0.786535973 |
| CORO7     | 16p13.3    | -0.0197  | 0.701143 | 0.786743104 |
| HSPA1L    | 6p21.33    | 0.019685 | 0.701339 | 0.786866701 |
| CCM2L     | 20q11.21   | -0.01968 | 0.701364 | 0.786866701 |
| EZH1P     | Xp11.22    | -0.01968 | 0.701371 | 0.786866701 |
| GGN       | 19q13.2    | 0.019675 | 0.701475 | 0.786939707 |
| DYRK3     | 1q32.1     | 0.019665 | 0.701631 | 0.787070465 |
| RHOBTB2   | 8p21.3     | 0.019662 | 0.701672 | 0.787071736 |
| TSTD1     | 1q23.3     | -0.01966 | 0.701746 | 0.787075904 |
| PM20D1    | 1q32.1     | 0.019656 | 0.701754 | 0.787075904 |
| OR9Q2     | 11q12.1    | 0.019652 | 0.701816 | 0.787101806 |
| LRRC8D    | 1p22.2     | -0.01963 | 0.702095 | 0.787349752 |
| ADH7      | 4q23       | -0.01963 | 0.702137 | 0.787349752 |
| LINC00205 | 21q22.3    | 0.019626 | 0.702188 | 0.787349752 |
| CENPL     | 1q25.1     | -0.01962 | 0.702219 | 0.787349752 |

|            |               |          |          |             |
|------------|---------------|----------|----------|-------------|
| DAZ3       | Yq11.23       | -0.01962 | 0.702238 | 0.787349752 |
| LY6D       | 8q24.3        | -0.01962 | 0.702273 | 0.787349752 |
| TREM1      | 6p21.1        | -0.01962 | 0.702331 | 0.787370493 |
| SDK1       | 7p22.2        | -0.01961 | 0.702415 | 0.787420595 |
| TARS2      | 1q21.2        | 0.019603 | 0.702527 | 0.787502087 |
| CHST15     | 10q26.13      | -0.01959 | 0.702639 | 0.787583577 |
| MALT1      | 18q21.32      | 0.019589 | 0.702723 | 0.787633673 |
| PDK1       | 2q31.1        | 0.019578 | 0.702879 | 0.787738489 |
| KRT16      | 17q21.2       | -0.01958 | 0.702895 | 0.787738489 |
| CAGE1      | 6p24.3        | 0.019567 | 0.703039 | 0.787827401 |
| NPPC       | 2q37.1        | 0.019566 | 0.703053 | 0.787827401 |
| PLD3       | 19q13.2       | -0.01953 | 0.703632 | 0.78843178  |
| OTOP1      | 4p16.3        | -0.01951 | 0.703879 | 0.788622259 |
| SPINK9     | 5q32          | 0.019509 | 0.703881 | 0.788622259 |
| MYOG       | 1q32.1        | -0.0195  | 0.70401  | 0.788687906 |
| PAQR5      | 15q23         | -0.0195  | 0.704018 | 0.788687906 |
| LINC01226  | 1p35.2        | -0.01946 | 0.704528 | 0.789215313 |
| CD93       | 20p11.21      | 0.019447 | 0.704772 | 0.789417273 |
| CNKSR1     | 1p36.11       | -0.01945 | 0.704788 | 0.789417273 |
| HECA       | 6q24.1        | 0.019438 | 0.704912 | 0.789512695 |
| MRPS16     | 10q22.2       | -0.01943 | 0.705068 | 0.789643009 |
| SLC47A1    | 17p11.2       | -0.01942 | 0.705124 | 0.78966166  |
| PCNX4      | 14q23.1       | 0.019413 | 0.705274 | 0.789784991 |
| ERG28      | 14q24.3       | 0.019399 | 0.705475 | 0.789965881 |
| UBE2Q2P2   | 15q25.2       | -0.01939 | 0.705615 | 0.79007859  |
| ZFP91-CNTF | 11q12.1       | -0.01937 | 0.705825 | 0.790202109 |
| TUFM       | 16p11.2       | 0.019374 | 0.705828 | 0.790202109 |
| SVOPL      | 7q34          | -0.01937 | 0.705846 | 0.790202109 |
| MAGEA8     | Xq28          | 0.019369 | 0.705905 | 0.790202109 |
| OR13C5     | 9q31.1        | 0.019368 | 0.705922 | 0.790202109 |
| FCSK       | 16q22.1       | -0.01936 | 0.706028 | 0.790276079 |
| PRKAR2A    | 3p21.31       | -0.01935 | 0.706209 | 0.790415693 |
| FCAR       | 19q13.42      | -0.01935 | 0.706232 | 0.790415693 |
| ABCA17P    | 16p13.3       | -0.01934 | 0.706355 | 0.790510237 |
| IL22       | 12q15         | -0.01932 | 0.706565 | 0.790683262 |
| UNC93B1    | 11q13.2       | 0.019322 | 0.706589 | 0.790683262 |
| PBRM1      | 3p21.1        | -0.0193  | 0.706845 | 0.790828879 |
| CDK7       | 5q13.2        | 0.019304 | 0.706848 | 0.790828879 |
| CLDND1     | 3q11.2        | 0.019304 | 0.706851 | 0.790828879 |
| RIBC2      | 22q13.31      | 0.019302 | 0.706885 | 0.790828879 |
| C1ORF94    | 1p35.1        | 0.019299 | 0.706917 | 0.790828879 |
| IFNA10     | 9p21.3        | 0.019284 | 0.707144 | 0.79103864  |
| TROAP      | 12q13.12      | -0.01928 | 0.707197 | 0.791054358 |
| OR10C1     | 6p22.1        | 0.019249 | 0.707643 | 0.791426531 |
| SYT9       | 11p15.4       | -0.01925 | 0.707661 | 0.791426531 |
| OR7G2      | 19p13.2       | 0.019247 | 0.70768  | 0.791426531 |
| PRSS27     | 16p13.3       | 0.019244 | 0.707716 | 0.791426531 |
| LYRM9      | 17q11.2       | -0.01924 | 0.707727 | 0.791426531 |
| CASTOR2    | 7q11.23       | -0.01922 | 0.708092 | 0.791734561 |
| NPPB       | 1p36.22       | -0.01922 | 0.708124 | 0.791734561 |
|            | 2-Mar 19p13.2 | -0.01921 | 0.708142 | 0.791734561 |
| GSX2       | 4q12          | 0.019213 | 0.708161 | 0.791734561 |
| ATP8B2     | 1q21.3        | -0.0192  | 0.708333 | 0.791845213 |
| ANKRD34B   | 5q14.1        | -0.0192  | 0.708339 | 0.791845213 |
| OR51Q1     | 11p15.4       | -0.01919 | 0.708451 | 0.791926503 |
| MMGT1      | Xq26.3        | -0.01919 | 0.708545 | 0.791987018 |
| FCGR2C     | 1q23.3        | 0.019184 | 0.708595 | 0.791998635 |
| TEPP       | 16q21         | -0.01917 | 0.708742 | 0.792118281 |

|           |              |          |          |             |
|-----------|--------------|----------|----------|-------------|
| NLRP13    | 19q13.43     | 0.01917  | 0.708791 | 0.792129151 |
| BOD1L1    | 4p15.33      | 0.01916  | 0.708932 | 0.792242793 |
| KRTAP17-1 | 17q21.2      | 0.019148 | 0.709105 | 0.792391884 |
| PPAT      | 4q12         | -0.01914 | 0.709294 | 0.792559061 |
| DUSP10    | 1q41         | 0.01912  | 0.709522 | 0.792763723 |
| UPF1      | 19p13.11     | 0.019117 | 0.709566 | 0.792763723 |
| CDK1      | 10q21.2      | 0.019112 | 0.709631 | 0.792763723 |
| SAGE1     | Xq26.3       | -0.01911 | 0.709636 | 0.792763723 |
| TREM2     | 6p21.1       | 0.019106 | 0.709713 | 0.792805449 |
| FBXO39    | 17p13.1      | 0.019082 | 0.710074 | 0.793164358 |
| HES7      | 17p13.1      | -0.01907 | 0.710286 | 0.793301857 |
| NCAM1     | 11q23.2      | -0.01907 | 0.7103   | 0.793301857 |
| TYW3      | 1p31.1       | 0.019065 | 0.710316 | 0.793301857 |
| FRMPD1    | 9p13.2       | -0.01904 | 0.710666 | 0.793649321 |
| NELL2     | 12q12        | -0.01903 | 0.710884 | 0.793848037 |
| CHRNA6    | 8p11.21      | 0.019013 | 0.711067 | 0.794008638 |
| KCNRG     | 13q14.2      | 0.019002 | 0.711228 | 0.794143699 |
| DDX21     | 10q22.1      | 0.018993 | 0.711362 | 0.794249479 |
| AKR1C2    | 10p15.1      | -0.01898 | 0.711562 | 0.794427217 |
| GRK4      | 4p16.3       | 0.018976 | 0.711605 | 0.794427217 |
| SSH1      | 12q24.11     | -0.01897 | 0.71164  | 0.794427217 |
| LINC00112 | 21q22.3      | -0.01897 | 0.711683 | 0.794430511 |
| MMP27     | 11q22.2      | 0.018963 | 0.711796 | 0.794482808 |
| MFSD10    | 4p16.3       | -0.01896 | 0.711809 | 0.794482808 |
| ASCL1     | 12q23.2      | -0.01895 | 0.711928 | 0.794534907 |
| ENO2      | 12p13.31     | 0.018953 | 0.711941 | 0.794534907 |
| GLDN      | 15q21.2      | -0.01895 | 0.711975 | 0.794534907 |
| CDH10     | 5p14.2-p14.1 | -0.01895 | 0.712017 | 0.794537087 |
| OR1N2     | 9q33.2       | -0.01894 | 0.712075 | 0.794557388 |
| TMEM133   | 11q22.1      | -0.01894 | 0.712194 | 0.794646313 |
| LINC01205 | 3q13.13      | -0.01889 | 0.712841 | 0.795323958 |
| DMRTA1    | 9p21.3       | -0.01888 | 0.713019 | 0.795477895 |
| OSTCP1    | 6q25.3       | -0.01885 | 0.7134   | 0.795858604 |
| SMIM19    | 8p11.21      | 0.018839 | 0.713601 | 0.796039431 |
| SPR       | 2p13.2       | -0.01882 | 0.713805 | 0.796195079 |
| INPP5A    | 10q26.3      | 0.018824 | 0.71382  | 0.796195079 |
| IQCH      | 15q23        | 0.01882  | 0.713867 | 0.796203092 |
| RPS23     | 5q14.2       | -0.0188  | 0.714102 | 0.796420529 |
| ADA2      | 22q11.1      | 0.0188   | 0.714168 | 0.796449478 |
| ZNF286A   | 17p12        | 0.018787 | 0.714356 | 0.796614556 |
| EEF1A1P9  | 4q24         | -0.01874 | 0.715019 | 0.797285348 |
| SNORD89   | 2q11.2       | -0.01874 | 0.715057 | 0.797285348 |
| CRX       | 19q13.33     | 0.018736 | 0.715088 | 0.797285348 |
| YIPF2     | 19p13.2      | 0.018734 | 0.715116 | 0.797285348 |
| SSX6P     | Xp11.23      | 0.018698 | 0.715651 | 0.797836538 |
| ABHD17A   | 19p13.3      | 0.018677 | 0.715946 | 0.798121815 |
| GMNC      | 3q28         | -0.01867 | 0.715986 | 0.798122039 |
| GPX5      | 6p22.1       | 0.018667 | 0.716095 | 0.798198474 |
| APLP1     | 19q13.12     | -0.01865 | 0.716285 | 0.798365659 |
| BCCIP     | 10q26.2      | 0.018648 | 0.716379 | 0.798426006 |
| ASZ1      | 7q31.2       | -0.01864 | 0.716432 | 0.798440548 |
| FEV       | 2q35         | 0.018635 | 0.716568 | 0.798547572 |
| PCDHB8    | 5q31.3       | 0.018616 | 0.716836 | 0.798802543 |
| ABCC11    | 16q12.1      | 0.018612 | 0.716896 | 0.798824525 |
| COX7B2    | 4p12         | -0.0186  | 0.717029 | 0.798927623 |
| UBAP2     | 9p13.3       | 0.0186   | 0.717068 | 0.798927623 |
| MC5R      | 18p11.21     | 0.01858  | 0.717358 | 0.799206235 |
| COG1      | 17q25.1      | -0.01857 | 0.717498 | 0.799317152 |

|            |                  |          |          |             |
|------------|------------------|----------|----------|-------------|
| FUT5       | 19p13.3          | 0.018555 | 0.717727 | 0.799495567 |
| ADAM3A     | 8p11.22          | -0.01855 | 0.717749 | 0.799495567 |
| KDM5D      | Yq11.223         | 0.018552 | 0.717778 | 0.799495567 |
| CUL9       | 6p21.1           | 0.018544 | 0.717886 | 0.799541829 |
| DHDH       | 19q13.33         | -0.01854 | 0.717899 | 0.799541829 |
| CCL3L1     | 17q21.1          | -0.01852 | 0.718286 | 0.799928484 |
| SLX4IP     | 20p12.2          | -0.01851 | 0.718394 | 0.799964809 |
| KRT82      | 12q13.13         | -0.01851 | 0.718399 | 0.799964809 |
| INO80D     | 2q33.3           | -0.0185  | 0.718507 | 0.8000362   |
| TPH2       | 12q21.1          | -0.0185  | 0.718543 | 0.8000362   |
| IFIT3      | 10q23.31         | 0.018494 | 0.718611 | 0.800067736 |
| DTX4       | 11q12.1          | 0.018469 | 0.718987 | 0.800442334 |
| PKDCC      | 2p21             | -0.01846 | 0.719097 | 0.800520077 |
| AQP9       | 15q21.3          | -0.01844 | 0.719408 | 0.800821353 |
| BMPER      | 7p14.3           | 0.018434 | 0.719486 | 0.800864098 |
| DRD3       | 3q13.31          | 0.018431 | 0.719532 | 0.800870199 |
| TBCA       | 5q14.1           | 0.018425 | 0.719621 | 0.800925328 |
| C2ORF27B   | 2q21.2           | -0.01842 | 0.719714 | 0.800983748 |
| KANK3      | 19p13.2          | -0.01838 | 0.72023  | 0.801513919 |
| HCG22      | 6p21.33          | -0.01837 | 0.720351 | 0.801602997 |
| PLA2G4F    | 15q15.1          | -0.01837 | 0.72039  | 0.801602997 |
| LINC01599  | 14q21.3          | 0.018367 | 0.720469 | 0.801646297 |
| ADAMTS1    | 21q21.3          | 0.018353 | 0.720676 | 0.801831796 |
| ACTR10     | 14q23.1          | 0.018343 | 0.72082  | 0.801947939 |
| NBPF22P    | 5q14.3           | -0.01834 | 0.72086  | 0.80194796  |
| SLC6A18    | 5p15.33          | -0.01833 | 0.721066 | 0.802131933 |
| NR2C1      | 12q22            | 0.018297 | 0.721489 | 0.802522487 |
| FSCB       | 14q21.2          | -0.01829 | 0.721533 | 0.802522487 |
| HBM        | 16p13.3          | 0.018293 | 0.721541 | 0.802522487 |
| SNX29P2    | 16p11.2          | -0.01829 | 0.721577 | 0.802522487 |
| KLHL30     | 2q37.3           | -0.01828 | 0.721778 | 0.802701418 |
| ASB17      | 1p31.1           | -0.01824 | 0.722375 | 0.803294583 |
| HJV        | 1q21.1           | 0.018233 | 0.722418 | 0.803294583 |
| KEL        | 7q34             | 0.018232 | 0.722432 | 0.803294583 |
| PTTG2      | 4p14             | -0.01822 | 0.722652 | 0.803495319 |
| LINC00244  | 7q36.3           | 0.018204 | 0.722847 | 0.803667306 |
| CFAP53     | 18q21.1          | -0.0182  | 0.722947 | 0.803733584 |
| LENG8      | 19q13.42         | -0.01818 | 0.723136 | 0.803898539 |
| ZNF211     | 19q13.43         | 0.018179 | 0.723208 | 0.803898539 |
| TOMM20L    | 14q23.1          | 0.018179 | 0.723216 | 0.803898539 |
| SOS1       | 2p22.1           | -0.01817 | 0.723349 | 0.804002449 |
| TNFAIP1    | 17q11.2          | -0.01813 | 0.723925 | 0.804587616 |
| FAM222B    | 17q11.2          | 0.018128 | 0.723956 | 0.804587616 |
| TEF        | 22q13.2          | 0.018121 | 0.724063 | 0.804620634 |
| PDCD4-AS1  | 10q25.2          | -0.01812 | 0.724066 | 0.804620634 |
| TXLNGY     | Yq11.222-q11.223 | -0.01811 | 0.724159 | 0.804679265 |
| GP6        | 19q13.42         | -0.01811 | 0.724259 | 0.804745638 |
| FYTTD1     | 3q29             | -0.01809 | 0.72456  | 0.805035341 |
| MAGIX      | Xp11.23          | -0.01808 | 0.724626 | 0.80506407  |
| IL9        | 5q31.1           | -0.01808 | 0.724687 | 0.805069106 |
| LDHA       | 11p15.1          | 0.018076 | 0.724711 | 0.805069106 |
| DIRAS3     | 1p31.3           | -0.01806 | 0.724994 | 0.805338944 |
| PYCARD     | 16p11.2          | -0.01805 | 0.725048 | 0.805353701 |
| KLHL35     | 11q13.4          | 0.018029 | 0.725406 | 0.805707438 |
| DRC7       | 16q21            | -0.01803 | 0.72545  | 0.805711895 |
| MCM3AP-AS1 | 21q22.3          | -0.01802 | 0.725538 | 0.805720178 |
| CYP26B1    | 2p13.2           | 0.01802  | 0.725538 | 0.805720178 |
| C22ORF42   | 22q12.3          | 0.018006 | 0.725739 | 0.805898421 |

|              |                |          |          |             |
|--------------|----------------|----------|----------|-------------|
| TRIP10       | 19p13.3        | -0.01798 | 0.72608  | 0.806231926 |
| HDHD5        | 22q11.1        | -0.01798 | 0.726143 | 0.806257128 |
| CDK16        | Xp11.3         | -0.01794 | 0.726703 | 0.80682483  |
| GLYCTK       | 3p21.2         | -0.01794 | 0.726735 | 0.80682483  |
| SLFN12       | 17q12          | -0.01792 | 0.726958 | 0.807028296 |
| MRPL22       | 5q33.2         | -0.01792 | 0.727016 | 0.807048217 |
| AP1G2        | 14q11.2        | -0.01791 | 0.727094 | 0.807089143 |
| NMRK2        | 19p13.3        | -0.0179  | 0.727283 | 0.807210217 |
| IL17RE       | 3p25.3         | 0.017898 | 0.727323 | 0.807210217 |
| OCLNP1       | 5q13.2         | -0.0179  | 0.727324 | 0.807210217 |
| LINC00160    | 21q22.12       | -0.01789 | 0.727409 | 0.807256081 |
| OR4M1        | 14q11.2        | 0.017887 | 0.727486 | 0.807256081 |
| BPIFA4P      | 20q11.21       | -0.01789 | 0.727486 | 0.807256081 |
| SIGLEC14     | 19q13.41       | 0.017883 | 0.727536 | 0.807267458 |
| RASA4        | 7q22.1         | -0.01787 | 0.727683 | 0.807384917 |
| CASP12       | 11q22.3        | -0.01785 | 0.72803  | 0.807725934 |
| HIST1H2BN    | 6p22.1         | -0.01785 | 0.728084 | 0.807740968 |
| LRCH1        | 13q14.13-q14.2 | 0.017837 | 0.728215 | 0.807841386 |
| PIK3CA       | 3q26.32        | 0.017827 | 0.72835  | 0.807946936 |
| SPIN4        | Xq11.1         | -0.01782 | 0.728445 | 0.807990255 |
| CREB3L4      | 1q21.3         | -0.01782 | 0.72847  | 0.807990255 |
| LOC340357    | 8p23.1-p22     | -0.0178  | 0.728714 | 0.808215616 |
| LOC100129055 | 10p11.1        | 0.0178   | 0.728759 | 0.80822076  |
| HCN1         | 5p12           | -0.0178  | 0.728807 | 0.808229266 |
| DUPD1        | 10q22.2        | -0.01778 | 0.729038 | 0.808440983 |
| ISCA1P1      | 5q12.1         | -0.01777 | 0.729198 | 0.808573865 |
| PTCHD3       | 10p12.1        | -0.01774 | 0.7296   | 0.808974597 |
| ARSF         | Xp22.33        | 0.017722 | 0.729892 | 0.809253396 |
| FOXR2        | Xp11.21        | -0.01771 | 0.730003 | 0.809290719 |
| BATF3        | 1q32.3         | -0.01771 | 0.730027 | 0.809290719 |
| IFNA13       | 9p21.3         | 0.017712 | 0.730047 | 0.809290719 |
| IL17A        | 6p12.2         | 0.017676 | 0.730575 | 0.809831958 |
| PDPK1        | 16p13.3        | -0.01766 | 0.730743 | 0.809893867 |
| C17ORF49     | 17p13.1        | -0.01766 | 0.730753 | 0.809893867 |
| VPS33B       | 15q26.1        | -0.01766 | 0.730769 | 0.809893867 |
| CSNK1A1L     | 13q13.3        | -0.01766 | 0.730793 | 0.809893867 |
| DNAI2        | 17q25.1        | 0.017657 | 0.730845 | 0.809906686 |
| KRT6A        | 12q13.13       | -0.01765 | 0.730891 | 0.809913254 |
| PICALM       | 11q14.2        | 0.017644 | 0.731037 | 0.810029474 |
| SPATC1       | 8q24.3         | 0.017641 | 0.731081 | 0.810033639 |
| PLVAP        | 19p13.11       | -0.01763 | 0.731172 | 0.810073935 |
| UPP2         | 2q24.1         | 0.017632 | 0.731219 | 0.810073935 |
| C10ORF99     | 10q23.1        | -0.01763 | 0.731239 | 0.810073935 |
| NKTR         | 3p22.1         | -0.0176  | 0.731627 | 0.810459068 |
| STEAP3       | 2q14.2         | 0.017592 | 0.731807 | 0.810552345 |
| LPL          | 8p21.3         | 0.017589 | 0.731841 | 0.810552345 |
| ALG1         | 16p13.3        | -0.01759 | 0.731854 | 0.810552345 |
| PIGA         | Xp22.2         | -0.01759 | 0.731889 | 0.810552345 |
| SLC36A3      | 5q33.1         | -0.01758 | 0.731913 | 0.810552345 |
| THEMIS2      | 1p35.3         | 0.017581 | 0.731955 | 0.81055365  |
| IFNGR2       | 21q22.11       | 0.017566 | 0.732176 | 0.81075349  |
| SEPTIN3      | 22q13.2        | -0.01756 | 0.732236 | 0.810775072 |
| RSBN1L       | 7q11.23        | 0.017557 | 0.732315 | 0.810817625 |
| LINC00442    | 13q12.11       | -0.01755 | 0.732433 | 0.810838497 |
| C9ORF57      | 9q21.13        | 0.017547 | 0.732462 | 0.810838497 |
| PGPEP1       | 19p13.11       | 0.017545 | 0.732485 | 0.810838497 |
| ZNF257       | 19p12          | -0.01754 | 0.732549 | 0.810838497 |
| VWC2L        | 2q34-q35       | -0.01754 | 0.732585 | 0.810838497 |

|          |                |          |          |             |
|----------|----------------|----------|----------|-------------|
| PP12613  | 4q27           | -0.01754 | 0.732614 | 0.810838497 |
| KRTAP9-9 | 17q21.2        | 0.017536 | 0.732617 | 0.810838497 |
| TRPV1    | 17p13.2        | -0.01753 | 0.7327   | 0.810875557 |
| SELENOW  | 19q13.33       | 0.017528 | 0.732732 | 0.810875557 |
| CDK6     | 7q21.2         | 0.017497 | 0.733186 | 0.811333916 |
| LIPE     | 19q13.2        | -0.01749 | 0.733332 | 0.81144356  |
| CD1A     | 1q23.1         | 0.017485 | 0.733366 | 0.81144356  |
| OR1G1    | 17p13.3        | -0.01748 | 0.733473 | 0.811516542 |
| NUP133   | 1q42.13        | -0.01747 | 0.733559 | 0.811546742 |
| NID2     | 14q22.1        | -0.01747 | 0.733591 | 0.811546742 |
| FAM71C   | 12q23.1        | 0.017468 | 0.733622 | 0.811546742 |
| OR52N5   | 11p15.4        | -0.01746 | 0.733732 | 0.81162373  |
| CCDC168  | 13q33.1        | -0.01745 | 0.733873 | 0.81163519  |
| RNF31    | 14q12          | 0.017449 | 0.733891 | 0.81163519  |
| GPC5     | 13q31.3        | -0.01745 | 0.733901 | 0.81163519  |
| NUPR1    | 16p11.2        | -0.01745 | 0.733916 | 0.81163519  |
| PINX1    | 8p23.1         | -0.01745 | 0.733947 | 0.81163519  |
| ATP2B4   | 1q32.1         | 0.017443 | 0.733985 | 0.81163519  |
| GSG1     | 12p13.1        | 0.017434 | 0.734118 | 0.811707407 |
| DDX54    | 12q24.13       | -0.01743 | 0.734143 | 0.811707407 |
| RIOX2    | 3q11.2         | -0.01742 | 0.73426  | 0.811707407 |
| CXCL5    | 4q13.3         | -0.01742 | 0.734265 | 0.811707407 |
| OR1S2    | 11q12.1        | 0.017422 | 0.734294 | 0.811707407 |
| OR7G3    | 19p13.2        | 0.017422 | 0.734294 | 0.811707407 |
| IGSF21   | 1p36.13        | 0.017415 | 0.734397 | 0.811776589 |
| CBR4     | 4q32.3         | 0.017412 | 0.734447 | 0.811786682 |
| WDR89    | 14q23.2        | 0.017409 | 0.734491 | 0.811790774 |
| PTTG3P   | 8q13.1         | 0.017396 | 0.734676 | 0.811907187 |
| GUSBP2   | 6p22.2         | -0.0174  | 0.734677 | 0.811907187 |
| KRT86    | 12q13.13       | -0.01739 | 0.734758 | 0.811951922 |
| HMGXB3   | 5q32           | 0.017378 | 0.734933 | 0.812100481 |
| PRRG3    | Xq28           | -0.01736 | 0.735214 | 0.8123658   |
| SIX4     | 14q23.1        | 0.017342 | 0.735474 | 0.812581902 |
| UTY      | Yq11.221       | -0.01734 | 0.735491 | 0.812581902 |
| EFCAB6   | 22q13.2-q13.31 | -0.01734 | 0.735537 | 0.812587954 |
| ODF1     | 8q22.3         | -0.01732 | 0.735734 | 0.812760858 |
| R3HCC1L  | 10q24.2        | 0.017315 | 0.735866 | 0.812818128 |
| LIN28A   | 1p36.11        | 0.017315 | 0.735867 | 0.812818128 |
| CD109    | 6q13           | 0.017294 | 0.736169 | 0.813107431 |
| PEX11G   | 19p13.2        | -0.01729 | 0.736267 | 0.813170858 |
| PRTN3    | 19p13.3        | 0.017277 | 0.736423 | 0.813297657 |
| CHML     | 1q43           | -0.01726 | 0.736742 | 0.81360507  |
| MLF2     | 12p13.31       | 0.017239 | 0.736976 | 0.813818688 |
| BMS1P1   | 10q11.22       | 0.017221 | 0.737245 | 0.814070736 |
| OR11L1   | 1q44           | -0.01721 | 0.737343 | 0.814133982 |
| ACTR3BP2 | 2p11.1         | 0.017208 | 0.737444 | 0.814200883 |
| MSN      | Xq12           | -0.0172  | 0.737609 | 0.814337808 |
| ERC2-IT1 | 3p14.3         | 0.017187 | 0.737744 | 0.814442438 |
| ELK3     | 12q23.1        | -0.01717 | 0.737922 | 0.814593862 |
| SDHAF3   | 7q21.3         | -0.01717 | 0.737992 | 0.814625817 |
| SST      | 3q27.3         | -0.01713 | 0.738541 | 0.815187737 |
| C4ORF17  | 4q23           | 0.017108 | 0.738908 | 0.815539195 |
| FBXO32   | 8q24.13        | 0.017106 | 0.738941 | 0.815539195 |
| CUL2     | 10p11.21       | 0.017083 | 0.73927  | 0.815830179 |
| FAM86EP  | 4p16.3         | -0.01708 | 0.739286 | 0.815830179 |
| ADPGK    | 15q24.1        | -0.01707 | 0.73946  | 0.815915931 |
| CTDSP1   | 2q35           | 0.017069 | 0.739483 | 0.815915931 |
| KRTAP9-4 | 17q21.2        | 0.017067 | 0.739512 | 0.815915931 |

|              |               |          |          |             |
|--------------|---------------|----------|----------|-------------|
| KIF27        | 9q21.32       | 0.017066 | 0.739527 | 0.815915931 |
| NDUFA12      | 12q22         | 0.017026 | 0.740119 | 0.816524411 |
| UGT1A3       | 2q37.1        | -0.01702 | 0.74023  | 0.816602151 |
| OR2H1        | 6p22.1        | 0.01701  | 0.740345 | 0.816683445 |
| FMO4         | 1q24.3        | -0.017   | 0.740477 | 0.816784361 |
| MFSD11       | 17q25.1-q25.2 | 0.016984 | 0.740737 | 0.81702594  |
| CCNB2        | 15q22.2       | 0.016979 | 0.740808 | 0.817059562 |
| URB1         | 21q22.11      | -0.01696 | 0.741041 | 0.817271449 |
| ACOT13       | 6p22.3        | -0.01695 | 0.741206 | 0.817408179 |
| OCLM         | 1q31.1        | 0.016931 | 0.741518 | 0.817707035 |
| RPL41        | 12q13.2       | 0.016926 | 0.741586 | 0.817737557 |
| SNAR-G1      | 19q13.33      | -0.01692 | 0.741682 | 0.81776984  |
| DOCK4        | 7q31.1        | -0.01692 | 0.741697 | 0.81776984  |
| OSCP1        | 1p34.3        | -0.01691 | 0.741792 | 0.817829667 |
| DPY19L1      | 7p14.2        | 0.016908 | 0.741856 | 0.817837896 |
| ADSS         | 1q44          | 0.016903 | 0.741922 | 0.817837896 |
| ARID2        | 12q12         | 0.016903 | 0.741922 | 0.817837896 |
| ITGB3        | 17q21.32      | -0.01689 | 0.74209  | 0.817953715 |
| OOEP         | 6q13          | -0.01689 | 0.742109 | 0.817953715 |
| BNC1         | 15q25.2       | -0.01688 | 0.742225 | 0.818036964 |
| OR6F1        | 1q44          | 0.016872 | 0.742385 | 0.818168119 |
| CCT6B        | 17q12         | 0.016857 | 0.742598 | 0.818337538 |
| LOC400940    | 2p25.2        | -0.01686 | 0.742621 | 0.818337538 |
| MAG          | 19q13.12      | -0.01684 | 0.742796 | 0.818485163 |
| CDCA3        | 12p13.31      | -0.01682 | 0.743086 | 0.818737768 |
| LMO1         | 11p15.4       | -0.01682 | 0.743107 | 0.818737768 |
| PRAMEF12     | 1p36.21       | 0.016772 | 0.743853 | 0.8195148   |
| LHX9         | 1q31.3        | 0.016751 | 0.744167 | 0.819810596 |
| GNRHR2       | 1q21.1        | 0.016746 | 0.744244 | 0.819810596 |
| ZNF398       | 7q36.1        | 0.016746 | 0.744244 | 0.819810596 |
| BFAR         | 16p13.12      | -0.0167  | 0.744971 | 0.820566074 |
| LOC100128288 | 17p13.1       | 0.016683 | 0.745161 | 0.820730731 |
| PRO0611      | 1p35.2        | 0.016679 | 0.745226 | 0.820752666 |
| ENPP2        | 8q24.12       | 0.016676 | 0.745266 | 0.820752666 |
| H6PD         | 1p36.22       | 0.016674 | 0.745304 | 0.820752666 |
| LOC284788    | 20p11.21      | 0.016666 | 0.745411 | 0.820788586 |
| RHD          | 1p36.11       | 0.016664 | 0.745442 | 0.820788586 |
| EPHB4        | 7q22.1        | 0.016663 | 0.74546  | 0.820788586 |
| SOCS4        | 14q22.3       | -0.01666 | 0.745561 | 0.820855327 |
| LRRTM2       | 5q31.2        | 0.016645 | 0.745723 | 0.820987819 |
| SVIP         | 11p14.3       | 0.016642 | 0.745773 | 0.820997525 |
| RNASE9       | 14q11.2       | 0.016636 | 0.745866 | 0.821011358 |
| IL10         | 1q32.1        | -0.01663 | 0.745926 | 0.821011358 |
| OR2AT4       | 11q13.4       | -0.01663 | 0.745952 | 0.821011358 |
| VAMP4        | 1q24.3        | -0.01663 | 0.745962 | 0.821011358 |
| DZIP3        | 3q13.13       | -0.01663 | 0.74599  | 0.821011358 |
| COL18A1-AS1  | 21q22.3       | -0.0166  | 0.746342 | 0.821320281 |
| CCDC158      | 4q21.1        | -0.0166  | 0.746353 | 0.821320281 |
| TNS2         | 12q13.13      | -0.01658 | 0.746683 | 0.821637947 |
| OR2F2        | 7q35          | -0.01657 | 0.746852 | 0.821779757 |
| CNFN         | 19q13.2       | 0.016538 | 0.747302 | 0.822229317 |
| MICAL1       | 6q21          | 0.016534 | 0.747362 | 0.82225057  |
| TACSTD2      | 1p32.1        | 0.016495 | 0.747944 | 0.822845198 |
| PRM1         | 16p13.13      | -0.01647 | 0.748303 | 0.823195064 |
| ANKRD33      | 12q13.13      | 0.016467 | 0.748347 | 0.823198262 |
| PXT1         | 6p21.31       | -0.01646 | 0.748443 | 0.823258973 |
| TAF1A        | 1q41          | -0.01645 | 0.748557 | 0.823339213 |
| TFDP3        | Xq26.2        | -0.01644 | 0.748769 | 0.823460565 |

|              |          |          |          |             |
|--------------|----------|----------|----------|-------------|
| CELA2B       | 1p36.21  | -0.01644 | 0.74879  | 0.823460565 |
| TBC1D3H      | 17q12    | 0.016437 | 0.748791 | 0.823460565 |
| GEM          | 8q22.1   | -0.01642 | 0.749003 | 0.823647898 |
| SART3        | 12q23.3  | -0.01641 | 0.749254 | 0.823878912 |
| MAP3K10      | 19q13.2  | -0.0164  | 0.749324 | 0.823910607 |
| ZNF215       | 11p15.4  | 0.01639  | 0.749486 | 0.824043706 |
| HEXIM1       | 17q21.31 | 0.016369 | 0.749798 | 0.824320388 |
| MLH3         | 14q24.3  | -0.01637 | 0.74982  | 0.824320388 |
| ARSG         | 17q24.2  | 0.016318 | 0.750552 | 0.825069372 |
| RTCA         | 1p21.2   | 0.016316 | 0.750585 | 0.825069372 |
| TBC1D22A     | 22q13.31 | 0.016313 | 0.750625 | 0.825069372 |
| APLP2        | 11q24.3  | -0.01631 | 0.750711 | 0.825094237 |
| AFAP1        | 4p16.1   | 0.016306 | 0.75073  | 0.825094237 |
| OSMR         | 5p13.1   | -0.0163  | 0.750797 | 0.8251224   |
| UQCR11       | 19p13.3  | 0.016293 | 0.75093  | 0.825224001 |
| NME1-NME2    | 17q21.33 | -0.01629 | 0.751032 | 0.825290628 |
| DST          | 6p12.1   | -0.01628 | 0.751128 | 0.825333313 |
| GRB2         | 17q25.1  | 0.016277 | 0.751159 | 0.825333313 |
| COQ6         | 14q24.3  | 0.016274 | 0.751204 | 0.825333313 |
| FBXW4        | 10q24.32 | 0.016272 | 0.751236 | 0.825333313 |
| TNR          | 1q25.1   | -0.01626 | 0.751472 | 0.825487702 |
| OR9Q1        | 11q12.1  | -0.01625 | 0.751491 | 0.825487702 |
| ARHGEF39     | 9p13.3   | -0.01625 | 0.7515   | 0.825487702 |
| GTF2H3       | 12q24.31 | 0.016238 | 0.751732 | 0.825555561 |
| DKFZP434H168 | 16q13    | -0.01623 | 0.751782 | 0.825555561 |
| UGT2B10      | 4q13.2   | -0.01623 | 0.751785 | 0.825555561 |
| NUDT13       | 10q22.2  | -0.01623 | 0.751804 | 0.825555561 |
| CSF3R        | 1p34.3   | 0.016232 | 0.751822 | 0.825555561 |
| TFAMP1       | 7p22.3   | 0.016228 | 0.751878 | 0.825555561 |
| CD300LD      | 17q25.1  | -0.01623 | 0.751883 | 0.825555561 |
| DCAF8        | 1q23.2   | 0.016228 | 0.751892 | 0.825555561 |
| SSR4P1       | 21q22.3  | 0.016215 | 0.752073 | 0.825709545 |
| TAF15        | 17q12    | -0.0162  | 0.752274 | 0.825880985 |
| LRIT1        | 10q23.1  | -0.0162  | 0.752312 | 0.825880985 |
| KCNH1        | 1q32.2   | 0.016183 | 0.752555 | 0.826103247 |
| NDUFA2       | 5q31.3   | 0.016175 | 0.752669 | 0.826112716 |
| LOC643923    | 11q22.3  | -0.01617 | 0.752678 | 0.826112716 |
| LSM11        | 5q33.3   | 0.016172 | 0.752713 | 0.826112716 |
| AGRN         | 1p36.33  | 0.016171 | 0.752729 | 0.826112716 |
| PFN3         | 5q35.3   | 0.016161 | 0.752875 | 0.826227106 |
| HOXB9        | 17q21.32 | 0.016157 | 0.752942 | 0.826256348 |
| OR4N3P       | 15q11.2  | 0.016151 | 0.753029 | 0.826306478 |
| SLC25A53     | Xq22.2   | -0.01615 | 0.753098 | 0.826337001 |
| CCDC103      | 17q21.31 | 0.016119 | 0.753505 | 0.826695957 |
| OR52R1       | 11p15.4  | 0.016118 | 0.753508 | 0.826695957 |
| HMOX2        | 16p13.3  | -0.01609 | 0.753876 | 0.827021169 |
| MTVR2        | 17q22    | 0.016093 | 0.753887 | 0.827021169 |
| PPY2P        | 17q11.2  | 0.016084 | 0.754019 | 0.82708934  |
| NPBWR2       | 20q13.33 | -0.01608 | 0.754032 | 0.82708934  |
| OPN3         | 1q43     | -0.01608 | 0.754073 | 0.827089531 |
| ARL17B       | 17q21.31 | -0.01607 | 0.754269 | 0.827258237 |
| ZIM2         | 19q13.43 | 0.016023 | 0.754921 | 0.827928735 |
| KRT72        | 12q13.13 | 0.016015 | 0.755031 | 0.827995322 |
| TMA16        | 4q32.2   | 0.016013 | 0.755065 | 0.827995322 |
| LINC00092    | 9q22.32  | 0.015992 | 0.755382 | 0.828297894 |
| PMP2         | 8q21.13  | -0.01599 | 0.755427 | 0.82830197  |
| RGL3         | 19p13.2  | -0.01598 | 0.755623 | 0.828433626 |
| MCOLN2       | 1p22.3   | -0.01597 | 0.755642 | 0.828433626 |



|           |          |          |          |             |
|-----------|----------|----------|----------|-------------|
| DNTT      | 10q24.1  | 0.015972 | 0.755671 | 0.828433626 |
| SHROOM1   | 5q31.1   | 0.015965 | 0.755782 | 0.828509776 |
| PCDH11X   | Xq21.31  | 0.015957 | 0.755895 | 0.828588767 |
| HIST1H1A  | 6p22.2   | 0.015953 | 0.75595  | 0.8286034   |
| MGRN1     | 16p13.3  | -0.01595 | 0.755999 | 0.828611417 |
| COL11A2   | 6p21.32  | -0.01592 | 0.756378 | 0.828971692 |
| REXO1L1P  | 8q21.2   | -0.01592 | 0.75645  | 0.828971692 |
| PRRG2     | 19q13.33 | -0.01592 | 0.756452 | 0.828971692 |
| STATH     | 4q13.3   | -0.0159  | 0.756784 | 0.829223727 |
| TUBA3C    | 13q12.11 | -0.0159  | 0.756809 | 0.829223727 |
| OR5H6     | 3q11.2   | -0.01589 | 0.756832 | 0.829223727 |
| GMFG      | 19q13.2  | 0.015892 | 0.756854 | 0.829223727 |
| HKDC1     | 10q22.1  | -0.01589 | 0.756889 | 0.829223727 |
| SEPTIN9   | 17q25.3  | 0.015876 | 0.757099 | 0.829409037 |
| NT5C3A    | 7p14.3   | -0.01587 | 0.757217 | 0.829489556 |
| PIGF      | 2p21     | -0.01587 | 0.757256 | 0.829489556 |
| ELANE     | 19p13.3  | 0.015861 | 0.757313 | 0.829506726 |
| CCDC63    | 12q24.11 | -0.01585 | 0.757413 | 0.829571549 |
| PTPDC1    | 9q22.32  | -0.01585 | 0.757498 | 0.829584176 |
| DNA2      | 10q21.3  | -0.01585 | 0.757508 | 0.829584176 |
| CACNG2    | 22q12.3  | 0.01584  | 0.757635 | 0.829677844 |
| CASP4     | 11q22.3  | 0.015837 | 0.757677 | 0.829678655 |
| GOLGA2P3Y | Yq11.23  | 0.015828 | 0.757808 | 0.829731244 |
| C11ORF21  | 11p15.5  | 0.015828 | 0.757815 | 0.829731244 |
| HNF1A-AS1 | 12q24.31 | -0.01583 | 0.757849 | 0.829731244 |
| DNAJC9    | 10q22.2  | -0.01581 | 0.758111 | 0.82993753  |
| CDKL3     | 5q31.1   | -0.01581 | 0.75812  | 0.82993753  |
| SELENBP1  | 1q21.3   | 0.015792 | 0.758347 | 0.830140245 |
| PUSL1     | 1p36.33  | 0.015782 | 0.758487 | 0.830248615 |
| DCST1     | 1q21.3   | -0.01577 | 0.758607 | 0.830334285 |
| PPM1J     | 1p13.2   | -0.01577 | 0.758649 | 0.830334285 |
| SIGIRR    | 11p15.5  | 0.015761 | 0.758797 | 0.830451408 |
| C7ORF33   | 7q36.1   | -0.01574 | 0.759056 | 0.830689372 |
| SLC17A6   | 11p14.3  | 0.015733 | 0.75922  | 0.830822884 |
| NDST2     | 10q22.2  | 0.015714 | 0.759493 | 0.831076979 |
| HAUS1     | 18q21.1  | -0.0157  | 0.759777 | 0.831342584 |
| GPIHBP1   | 8q24.3   | -0.01569 | 0.759851 | 0.831346101 |
| SFXN3     | 10q24.31 | -0.01569 | 0.759864 | 0.831346101 |
| ABHD15    | 17q11.2  | 0.015684 | 0.759944 | 0.831388045 |
| AURKB     | 17p13.1  | -0.01568 | 0.760049 | 0.83142078  |
| PCDH17    | 13q21.1  | 0.015676 | 0.760065 | 0.83142078  |
| OR13H1    | Xq26.2   | -0.01567 | 0.760098 | 0.83142078  |
| KLHDC7B   | 22q13.33 | 0.015663 | 0.760249 | 0.831513884 |
| HNRNPA1   | 12q13.13 | -0.01566 | 0.760266 | 0.831513884 |
| RPAP2     | 1p22.1   | -0.01565 | 0.760413 | 0.83162919  |
| FGFR1OP2  | 12p11.23 | -0.01564 | 0.760551 | 0.831734011 |
| COPS7A    | 12p13.31 | 0.015631 | 0.760723 | 0.831877261 |
| OR4F29    | 1p36.33  | 0.015613 | 0.760995 | 0.832128996 |
| PNLIP     | 10q25.3  | -0.01561 | 0.761097 | 0.832195081 |
| ZNF597    | 16p13.3  | -0.01558 | 0.761482 | 0.832516603 |
| PIGB      | 15q21.3  | 0.015578 | 0.761516 | 0.832516603 |
| CHMP6     | 17q25.3  | 0.015578 | 0.761516 | 0.832516603 |
| C1ORF229  | 1q44     | -0.01557 | 0.761671 | 0.832628364 |
| SH2B1     | 16p11.2  | -0.01557 | 0.761701 | 0.832628364 |
| DNAAF4    | 15q21.3  | -0.01555 | 0.761992 | 0.832900871 |
| OR1N1     | 9q33.2   | -0.01554 | 0.762041 | 0.832904033 |
| EPHX4     | 1p22.1   | -0.01554 | 0.762129 | 0.832904033 |
| CAPNS2    | 16q12.2  | -0.01554 | 0.762144 | 0.832904033 |

|          |          |          |          |             |
|----------|----------|----------|----------|-------------|
| MUSK     | 9q31.3   | 0.015532 | 0.762194 | 0.832904033 |
| RCVRN    | 17p13.1  | -0.01553 | 0.762203 | 0.832904033 |
| CFL1     | 11q13.1  | -0.01552 | 0.762372 | 0.833043907 |
| KRT79    | 12q13.13 | -0.01551 | 0.762579 | 0.833224393 |
| KIF26A   | 14q32.33 | -0.01549 | 0.762849 | 0.833473543 |
| RTN4RL2  | 11q12.1  | -0.01548 | 0.762901 | 0.833485694 |
| TRIM62   | 1p35.1   | -0.01547 | 0.763098 | 0.833655114 |
| ERICH1   | 8p23.3   | -0.01546 | 0.763338 | 0.833787642 |
| TM9SF2   | 13q32.3  | 0.015455 | 0.763348 | 0.833787642 |
| MANF     | 3p21.2   | -0.01545 | 0.763351 | 0.833787642 |
| ALMS1    | 2p13.1   | -0.01545 | 0.763386 | 0.833787642 |
| C2CD6    | 2q33.1   | -0.01545 | 0.763485 | 0.8338504   |
| RETREG3  | 17q21.2  | -0.01544 | 0.7636   | 0.833910986 |
| TRPV3    | 17p13.2  | -0.01544 | 0.763624 | 0.833910986 |
| NOMO2    | 16p12.3  | -0.01543 | 0.763776 | 0.834031928 |
| SOX2-OT  | 3q26.33  | -0.01542 | 0.763908 | 0.83413086  |
| DEFB103A | 8p23.1   | 0.015402 | 0.764138 | 0.83433595  |
| SMIM20   | 4p15.2   | -0.01539 | 0.764355 | 0.834527758 |
| USP10    | 16q24.1  | -0.01538 | 0.764416 | 0.834548637 |
| TOLLIP   | 11p15.5  | 0.01538  | 0.764461 | 0.834552049 |
| FRG2DP   | 16p11.1  | -0.01537 | 0.764573 | 0.834611359 |
| SNORA36A | Xq28     | -0.01537 | 0.764637 | 0.834611359 |
| OR11H4   | 14q11.2  | -0.01537 | 0.764659 | 0.834611359 |
| EEF1DP3  | 13q13.1  | 0.015365 | 0.764682 | 0.834611359 |
| N6AMT1   | 21q21.3  | 0.015349 | 0.764925 | 0.834831069 |
| ATG2A    | 11q13.1  | -0.01534 | 0.765066 | 0.834939245 |
| POTEH    | 22q11.1  | -0.01534 | 0.76512  | 0.83495296  |
| MTX1     | 1q22     | -0.01533 | 0.765197 | 0.834991467 |
| KMT5B    | 11q13.2  | 0.015316 | 0.765411 | 0.835179979 |
| BICDL1   | 12q24.23 | -0.01531 | 0.765552 | 0.835284561 |
| BASP1    | 5p15.1   | -0.0153  | 0.765591 | 0.835284561 |
| OPRM1    | 6q25.2   | -0.01528 | 0.765956 | 0.83558718  |
| NBEA     | 13q13.3  | -0.01528 | 0.765968 | 0.83558718  |
| IP6K3    | 6p21.31  | -0.01528 | 0.765993 | 0.83558718  |
| ETNPPL   | 4q25     | -0.01526 | 0.766169 | 0.835710118 |
| FAM149B1 | 10q22.2  | -0.01526 | 0.766189 | 0.835710118 |
| HPS5     | 11p15.1  | 0.015252 | 0.766356 | 0.83584621  |
| WFDC2    | 20q13.12 | 0.015247 | 0.766429 | 0.835849469 |
| ULK2     | 17p11.2  | 0.015247 | 0.766442 | 0.835849469 |
| DDX23    | 12q13.12 | 0.015239 | 0.766554 | 0.835926181 |
| C5ORF38  | 5p15.33  | -0.01522 | 0.766831 | 0.836100425 |
| CNN2     | 19p13.3  | 0.01522  | 0.766836 | 0.836100425 |
| AKR1C1   | 10p15.1  | -0.01522 | 0.766839 | 0.836100425 |
| ZBTB48   | 1p36.31  | 0.01521  | 0.76698  | 0.836204935 |
| DNAJC17  | 15q15.1  | -0.01521 | 0.767019 | 0.836204935 |
| NDUFB1   | 14q32.12 | 0.015202 | 0.767102 | 0.836205822 |
| RTL4     | Xq23     | -0.0152  | 0.767116 | 0.836205822 |
| KIAA0408 | 6q22.33  | 0.015199 | 0.767145 | 0.836205822 |
| CELF2    | 10p14    | -0.01519 | 0.767214 | 0.836235861 |
| DMBT1P1  | 10q26.13 | 0.015169 | 0.767599 | 0.836610305 |
| CCDC27   | 1p36.32  | -0.01516 | 0.767735 | 0.83671221  |
| DYNLT1   | 6q25.3   | 0.015146 | 0.767932 | 0.836881402 |
| SLITRK2  | Xq27.3   | 0.015133 | 0.768132 | 0.837053788 |
| ZDHHHC5  | 11q12.1  | 0.015127 | 0.768223 | 0.837108069 |
| FAM170A  | 5q23.1   | -0.01512 | 0.768375 | 0.837227739 |
| EPOR     | 19p13.2  | 0.015113 | 0.768425 | 0.83723694  |
| TRIM50   | 7q11.23  | 0.015104 | 0.768561 | 0.837339358 |
| OR8B8    | 11q24.2  | 0.015099 | 0.768637 | 0.837358684 |

|           |                 |          |          |             |
|-----------|-----------------|----------|----------|-------------|
| DDX17     | 22q13.1         | 0.015097 | 0.768662 | 0.837358684 |
| LINC00691 | 3p24.2          | -0.01505 | 0.769352 | 0.838063918 |
| RDH8      | 19p13.2         | 0.01503  | 0.76966  | 0.83833936  |
| TGFB1     | 19q13.2         | -0.01503 | 0.769688 | 0.83833936  |
| MAOB      | Xp11.3          | -0.01502 | 0.769749 | 0.838360119 |
| LIPN      | 10q23.31        | 0.015005 | 0.770036 | 0.838626731 |
| FCGR2B    | 1q23.3          | 0.015    | 0.770115 | 0.838667031 |
| PABPC1L2B | Xq13.2          | 0.014971 | 0.770546 | 0.839068214 |
| SNX29     | 16p13.13-p13.12 | 0.014969 | 0.770567 | 0.839068214 |
| CEP104    | 1p36.32         | 0.014951 | 0.77084  | 0.839319466 |
| ARMH4     | 14q23.1         | 0.01494  | 0.771013 | 0.839462435 |
| MANEA     | 6q16.1          | 0.014932 | 0.771128 | 0.839542062 |
| TAS2R3    | 7q34            | 0.014928 | 0.771181 | 0.839542062 |
| TDRP      | 8p23.3          | -0.01493 | 0.771212 | 0.839542062 |
| GAS8-AS1  | 16q24.3         | 0.014916 | 0.771368 | 0.83966702  |
| NR1I2     | 3q13.33         | -0.01491 | 0.77142  | 0.839677791 |
| ITGAV     | 2q32.1          | -0.01489 | 0.771686 | 0.839922013 |
| RFX1      | 19p13.12        | -0.01489 | 0.771778 | 0.839975885 |
| NEMP2     | 2q32.2          | -0.01486 | 0.772166 | 0.840350815 |
| SHTN1     | 10q25.3         | 0.014859 | 0.772206 | 0.840350815 |
| CT45A4    | Xq26.3          | -0.01485 | 0.772314 | 0.840393709 |
| C16ORF92  | 16p11.2         | 0.014851 | 0.77233  | 0.840393709 |
| CDK20     | 9q22.1          | -0.01483 | 0.772713 | 0.84076563  |
| TIMM13    | 19p13.3         | -0.01482 | 0.772835 | 0.840852682 |
| GLT1D1    | 12q24.33        | 0.014787 | 0.773288 | 0.841299432 |
| GRPEL1    | 4p16.1          | 0.014776 | 0.773449 | 0.841428423 |
| FAM219B   | 15q24.1-q24.2   | 0.014767 | 0.773587 | 0.841532914 |
| CORT      | 1p36.22         | 0.014762 | 0.773662 | 0.841568647 |
| SLC35F3   | 1q42.2          | 0.014746 | 0.773892 | 0.84177374  |
| GFOD1     | 6p23            | 0.014743 | 0.773943 | 0.841783493 |
| KRT25     | 17q21.2         | 0.014739 | 0.773996 | 0.84179548  |
| SNORA48   | 17p13.1         | 0.014703 | 0.774539 | 0.842340233 |
| DEFB109B  | 8p23.1          | 0.014688 | 0.774759 | 0.842505275 |
| NBPF3     | 1p36.12         | 0.014687 | 0.774775 | 0.842505275 |
| C2ORF80   | 2q33.3          | -0.01467 | 0.775023 | 0.842728657 |
| SELP      | 1q24.2          | -0.01466 | 0.775141 | 0.842811956 |
| HORMAD1   | 1q21.3          | 0.014641 | 0.775468 | 0.84299598  |
| CYP2A6    | 19q13.2         | 0.014637 | 0.775527 | 0.84299598  |
| MBD3L1    | 19p13.2         | 0.014634 | 0.775563 | 0.84299598  |
| KRTAP19-8 | 21q22.11        | 0.014634 | 0.775563 | 0.84299598  |
| OR1A1     | 17p13.3         | -0.01463 | 0.775563 | 0.84299598  |
| TEX47     | 7q21.13         | 0.014634 | 0.775563 | 0.84299598  |
| DCLK2     | 4q31.23-q31.3   | 0.014619 | 0.77579  | 0.843197296 |
| ZGRF1     | 4q25            | 0.014615 | 0.775861 | 0.843207067 |
| FBXO45    | 3q29            | -0.01461 | 0.775884 | 0.843207067 |
| LIPT2     | 11q13.4         | -0.01458 | 0.776356 | 0.843674742 |
| C5ORF63   | 5q23.2          | -0.01457 | 0.776475 | 0.843758202 |
| DUX4L6    | 4q35.2          | 0.014557 | 0.776716 | 0.843974196 |
| RGS8      | 1q25.3          | 0.014552 | 0.7768   | 0.844020143 |
| LCE1A     | 1q21.3          | -0.01454 | 0.776925 | 0.844109991 |
| PLPP1     | 5q11.2          | 0.014538 | 0.777005 | 0.844151388 |
| POU5F2    | 5q15            | 0.014514 | 0.777365 | 0.844496722 |
| SNORA3A   | 11p15.4         | -0.01451 | 0.777482 | 0.844569089 |
| OR2L13    | 1q44            | -0.0145  | 0.777516 | 0.844569089 |
| MED7      | 5q33.3          | 0.014491 | 0.7777   | 0.84463413  |
| HBBP1     | 11p15.4         | -0.01449 | 0.777729 | 0.84463413  |
| SIX3      | 2p21            | 0.014489 | 0.777737 | 0.84463413  |
| IDI2      | 10p15.3         | -0.01449 | 0.777745 | 0.84463413  |

|              |          |          |          |             |
|--------------|----------|----------|----------|-------------|
| TAS2R7       | 12p13.2  | 0.014474 | 0.777962 | 0.844804458 |
| LINC01002    | 19p13.3  | 0.014472 | 0.777986 | 0.844804458 |
| PGAM5        | 12q24.33 | 0.014455 | 0.778247 | 0.845041542 |
| BIRC2        | 11q22.2  | 0.014449 | 0.778327 | 0.845083039 |
| NAPRT        | 8q24.3   | 0.014441 | 0.778459 | 0.845180414 |
| DGCR2        | 22q11.21 | -0.01443 | 0.778552 | 0.845185323 |
| APOC1P1      | 19q13.32 | 0.014432 | 0.778593 | 0.845185323 |
| USH1C        | 11p15.1  | -0.01443 | 0.778652 | 0.845185323 |
| ASXL2        | 2p23.3   | 0.014426 | 0.778675 | 0.845185323 |
| LST1         | 6p21.33  | 0.014426 | 0.778675 | 0.845185323 |
| B3GNT3       | 19p13.11 | -0.01442 | 0.778726 | 0.845195386 |
| MPP7         | 10p12.1  | 0.014416 | 0.778822 | 0.84525433  |
| GRAMD2B      | 5q23.2   | 0.014409 | 0.778932 | 0.845327238 |
| PCDHGB3      | 5q31.3   | 0.014393 | 0.779172 | 0.845541764 |
| ELOA3        | 18q21.1  | -0.01439 | 0.779261 | 0.845580607 |
| DMRT2        | 9p24.3   | 0.014385 | 0.779292 | 0.845580607 |
| PCAT4        | 4q21.21  | 0.01438  | 0.779365 | 0.845614153 |
| ACTR2        | 2p14     | -0.01437 | 0.779447 | 0.845656818 |
| LOC100133050 | 5q21.1   | 0.014367 | 0.779556 | 0.845729774 |
| ACVR1C       | 2q24.1   | -0.01436 | 0.779633 | 0.845767683 |
| SMAD5-AS1    | 5q31.1   | -0.01436 | 0.779698 | 0.845792359 |
| SPATA31D4    | 9q21.32  | -0.01435 | 0.77987  | 0.845930777 |
| OR1L4        | 9q33.2   | 0.014343 | 0.77991  | 0.845930777 |
| AKR1C6P      | 10p15.1  | 0.014314 | 0.780347 | 0.846358876 |
| CHSY1        | 15q26.3  | -0.01429 | 0.780718 | 0.846715106 |
| ELP1         | 9q31.3   | 0.014279 | 0.780876 | 0.846805765 |
| LINC00620    | 3p25.1   | 0.014276 | 0.780924 | 0.846805765 |
| CNMD         | 13q14.3  | -0.01427 | 0.78096  | 0.846805765 |
| SOX15        | 17p13.1  | 0.014273 | 0.780971 | 0.846805765 |
| OR52A5       | 11p15.4  | -0.01426 | 0.781119 | 0.846858499 |
| OR5K2        | 3q11.2   | -0.01426 | 0.781143 | 0.846858499 |
| LMNB2        | 19p13.3  | -0.01426 | 0.781146 | 0.846858499 |
| REXO5        | 16p12.3  | 0.014222 | 0.781729 | 0.847444511 |
| NKX6-1       | 4q21.23  | 0.014215 | 0.781837 | 0.847515964 |
| CLEC18A      | 16q22.1  | 0.014188 | 0.782228 | 0.847893911 |
| ZNF710       | 15q26.1  | -0.01418 | 0.782386 | 0.848011909 |
| ILDR2        | 1q24.1   | 0.014175 | 0.782432 | 0.848011909 |
| FAM74A4      | 9q12     | 0.01417  | 0.782507 | 0.848011909 |
| SPANXN1      | Xq27.3   | -0.01417 | 0.782507 | 0.848011909 |
| IFNA8        | 9p21.3   | 0.014153 | 0.782761 | 0.84824004  |
| PP7080       | 5p15.33  | 0.01415  | 0.782802 | 0.84824004  |
| RASSF7       | 11p15.5  | -0.01415 | 0.782869 | 0.848267458 |
| C9ORF139     | 9q34.3   | -0.01414 | 0.782923 | 0.848279421 |
| RFC5         | 12q24.23 | 0.014125 | 0.783182 | 0.848514294 |
| LINC01124    | 2q31.1   | -0.01412 | 0.783248 | 0.848539921 |
| NRXN1        | 2p16.3   | -0.01412 | 0.783297 | 0.848546691 |
| PPARG        | 3p25.2   | -0.0141  | 0.783569 | 0.848795498 |
| POU4F2       | 4q31.22  | 0.014078 | 0.783885 | 0.849071956 |
| HIST1H2AG    | 6p22.1   | -0.01408 | 0.783909 | 0.849071956 |
| GASK1B       | 4q32.1   | -0.01406 | 0.784178 | 0.84931755  |
| NPNT         | 4q24     | -0.01405 | 0.784365 | 0.849474105 |
| SRI          | 7q21.12  | 0.014034 | 0.784545 | 0.849602171 |
| FBXO4        | 5p13.1   | 0.014032 | 0.784568 | 0.849602171 |
| OR2G6        | 1q44     | -0.01402 | 0.784695 | 0.84968734  |
| KCNK16       | 6p21.2   | -0.01402 | 0.784731 | 0.84968734  |
| SNORA55      | 1p34.3   | 0.014017 | 0.784792 | 0.849707388 |
| SCOC         | 4q31.1   | 0.014013 | 0.784848 | 0.849722128 |
| GAGE8        | Xp11     | 0.014004 | 0.784997 | 0.849830721 |

|           |                |          |          |             |
|-----------|----------------|----------|----------|-------------|
| PLCZ1     | 12p12.3        | -0.014   | 0.785034 | 0.849830721 |
| CLPTM1L   | 5p15.33        | -0.01399 | 0.785235 | 0.849973301 |
| ZNF226    | 19q13.31       | 0.013987 | 0.785252 | 0.849973301 |
| PSG2      | 19q13.31       | -0.01398 | 0.785293 | 0.849973301 |
| KRT14     | 17q21.2        | 0.013975 | 0.785428 | 0.850073313 |
| GYPE      | 4q31.21        | 0.013963 | 0.785607 | 0.850221757 |
| COMTD1    | 10q22.2        | -0.01395 | 0.785738 | 0.850317965 |
| ALAD      | 9q32           | -0.01394 | 0.785942 | 0.850490742 |
| TCAIM     | 3p21.31        | 0.013936 | 0.786013 | 0.850490742 |
| SHQ1      | 3p13           | -0.01393 | 0.786026 | 0.850490742 |
| MAPT      | 17q21.31       | -0.01392 | 0.786261 | 0.850670474 |
| PGLYRP2   | 19p13.12       | 0.013917 | 0.786293 | 0.850670474 |
| RFX3      | 9p24.2         | -0.01392 | 0.786319 | 0.850670474 |
| CXORF66   | Xq27.1         | -0.01391 | 0.786368 | 0.850677523 |
| OGA       | 10q24.32       | -0.01391 | 0.786429 | 0.850697224 |
| COQ8A     | 1q42.13        | 0.013903 | 0.786506 | 0.850735025 |
| ZFY       | Yp11.2         | -0.0139  | 0.786578 | 0.850766571 |
| CDK18     | 1q32.1         | -0.01388 | 0.786858 | 0.851023478 |
| IL13      | 5q31.1         | 0.013858 | 0.78718  | 0.851325665 |
| HIST2H2AC | 1q21.2         | -0.01385 | 0.787287 | 0.851395668 |
| DNAH11    | 7p15.3         | 0.013837 | 0.787498 | 0.85157242  |
| COX4I1    | 16q24.1        | 0.013834 | 0.787535 | 0.85157242  |
| KLF8      | Xp11.21        | -0.01383 | 0.787632 | 0.851631129 |
| GKN1      | 2p13.3         | 0.013813 | 0.787853 | 0.851823577 |
| SCARNA22  | 4p16.3         | 0.013809 | 0.787917 | 0.851846797 |
| PSEN2     | 1q42.13        | -0.0138  | 0.788013 | 0.851904944 |
| GSTM1     | 1p13.3         | 0.013786 | 0.78826  | 0.852125608 |
| DDX11     | 12p11.21       | -0.01378 | 0.788413 | 0.852245658 |
| NT5DC1    | 6q22.1         | 0.013772 | 0.788465 | 0.852255491 |
| RPS4Y1    | Yp11.2         | -0.01375 | 0.78882  | 0.852592871 |
| ARMS2     | 10q26.13       | -0.01374 | 0.789008 | 0.852742093 |
| RAB11FIP5 | 2p13.2         | 0.013734 | 0.789043 | 0.852742093 |
| INTS12    | 4q24           | -0.01373 | 0.789108 | 0.852765867 |
| C12ORF71  | 12p11.23       | -0.01372 | 0.789235 | 0.852857747 |
| OR5V1     | 6p22.1         | -0.01371 | 0.789468 | 0.853062791 |
| COL5A3    | 19p13.2        | -0.0137  | 0.789518 | 0.853070965 |
| RBBP5     | 1q32.1         | 0.013697 | 0.789598 | 0.853112174 |
| TNFSF12   | 17p13.1        | -0.01367 | 0.789928 | 0.853335635 |
| BNIP1     | 1q21.3         | -0.01367 | 0.789942 | 0.853335635 |
| TRIM60    | 4q32.3         | 0.013671 | 0.789978 | 0.853335635 |
| ZNF322P1  | 9q22.33        | -0.01367 | 0.790015 | 0.853335635 |
| HMGN5     | Xq21.1         | 0.013669 | 0.790018 | 0.853335635 |
| PMCH      | 12q23.2        | -0.01366 | 0.790117 | 0.8533964   |
| MYMK      | 9q34.2         | 0.013647 | 0.790342 | 0.853557398 |
| SCARNA3   | 1q25.1         | 0.013646 | 0.790351 | 0.853557398 |
| KCNH4     | 17q21.2        | -0.01364 | 0.790482 | 0.85365247  |
| SLC8A3    | 14q24.2        | 0.013632 | 0.79056  | 0.853690423 |
| TMPRSS7   | 3q13.2         | -0.01363 | 0.790635 | 0.853725564 |
| CELA3B    | 1p36.12        | 0.013619 | 0.790761 | 0.853815955 |
| ZNF280D   | 15q21.3        | 0.013607 | 0.790945 | 0.853968637 |
| MGAT4B    | 5q35.3         | 0.013603 | 0.791007 | 0.853988879 |
| P4HTM     | 3p21.31 3p21.3 | 0.013563 | 0.791601 | 0.854584736 |
| ZFYVE19   | 15q15.1        | 0.013481 | 0.792833 | 0.855868148 |
| RHO       | 3q22.1         | -0.01348 | 0.792921 | 0.855916793 |
| NHLH2     | 1p13.1         | 0.013467 | 0.793042 | 0.85600125  |
| CD320     | 19p13.2        | -0.01345 | 0.793366 | 0.856305607 |
| ALS2CL    | 3p21.31        | 0.013442 | 0.793415 | 0.856311811 |
| IPO9      | 1q32.1         | 0.013424 | 0.793687 | 0.856558833 |

|             |                 |          |          |             |
|-------------|-----------------|----------|----------|-------------|
| EHD4        | 15q15.1         | -0.01341 | 0.793861 | 0.856701145 |
| NAGK        | 2p13.3          | -0.0134  | 0.79412  | 0.856934202 |
| HMHB1       | 5q31.3          | 0.013389 | 0.794222 | 0.856998237 |
| POLR3A      | 10q22.3         | -0.01338 | 0.794369 | 0.85706443  |
| OIP5        | 15q15.1         | -0.01338 | 0.794369 | 0.85706443  |
| CMC2        | 16q23.2         | 0.013355 | 0.794728 | 0.857397869 |
| ARHGAP8     | 22q13.31        | 0.013353 | 0.794764 | 0.857397869 |
| KHDC3L      | 6q13            | 0.013344 | 0.794887 | 0.857485093 |
| GLTPD2      | 17p13.2         | 0.013337 | 0.794993 | 0.857553231 |
| CRTC1       | 19p13.11        | -0.01332 | 0.79521  | 0.857740938 |
| FYN         | 6q21            | -0.01331 | 0.795469 | 0.857931237 |
| MSI2        | 17q22           | -0.01331 | 0.795472 | 0.857931237 |
| BEND7       | 10p13           | 0.013288 | 0.795731 | 0.858164241 |
| CDKL2       | 4q21.1          | 0.013282 | 0.795823 | 0.858217382 |
| TTR         | 18q12.1         | -0.01328 | 0.795882 | 0.858217561 |
| ZNF527      | 19q13.12        | -0.01328 | 0.795909 | 0.858217561 |
| OR5B17      | 11q12.1         | -0.01324 | 0.796445 | 0.858714928 |
| DLC1        | 8p22            | -0.01324 | 0.796456 | 0.858714928 |
| CLK3        | 15q24.1         | -0.01322 | 0.796767 | 0.858996207 |
| CDH22       | 20q13.12        | 0.013217 | 0.796803 | 0.858996207 |
| CYTH2       | 19q13.33        | -0.01321 | 0.796958 | 0.85910298  |
| OR2L2       | 1q44            | -0.0132  | 0.796988 | 0.85910298  |
| BARHL2      | 1p22.2          | -0.0132  | 0.797131 | 0.859184822 |
| TAS1R1      | 1p36.31         | 0.013194 | 0.79715  | 0.859184822 |
| IGSF11      | 3q13.32         | -0.01318 | 0.797285 | 0.859275964 |
| RHOXF2B     | Xq24            | -0.01318 | 0.797351 | 0.859275964 |
| HNRNPA0     | 5q31.2          | 0.01318  | 0.797363 | 0.859275964 |
| VSTM1       | 19q13.42        | -0.01317 | 0.79754  | 0.859381595 |
| CFAP97D1    | 17q21.31        | 0.013167 | 0.797547 | 0.859381595 |
| MSTO1       | 1q22            | -0.01316 | 0.797648 | 0.859444311 |
| SLC16A2     | Xq13.2          | 0.013135 | 0.798033 | 0.859813296 |
| AFG1L       | 6q21            | 0.013125 | 0.798189 | 0.859923168 |
| NBEAL2      | 3p21.31         | -0.01312 | 0.798221 | 0.859923168 |
| IFNA2       | 9p21.3          | -0.01312 | 0.798271 | 0.859931135 |
| SPRY3       | Xq28 and Yq12   | -0.01311 | 0.798357 | 0.859977179 |
| LINC02112   | 5p15.31-p15.2   | 0.013104 | 0.798496 | 0.860057347 |
| ST3GAL1     | 8q24.22         | 0.013099 | 0.798574 | 0.860057347 |
| CEACAM16    | 19q13.31-q13.32 | 0.013099 | 0.798584 | 0.860057347 |
| DENND2A     | 7q34            | 0.013097 | 0.798603 | 0.860057347 |
| PSG6        | 19q13.31        | -0.01308 | 0.798811 | 0.860191602 |
| GSTO1       | 10q25.1         | -0.01308 | 0.798814 | 0.860191602 |
| GNB2        | 7q22.1          | -0.01308 | 0.798862 | 0.860197678 |
| H1FNT       | 12q13.11        | -0.01306 | 0.799174 | 0.860486807 |
| CYP8B1      | 3p22.1          | -0.01305 | 0.799241 | 0.86051287  |
| TMPRSS11BNL | 4q13.2          | 0.013047 | 0.799352 | 0.860586037 |
| LIM2        | 19q13.41        | 0.01304  | 0.799471 | 0.860667639 |
| TTY14       | Yq11.222        | -0.01303 | 0.799637 | 0.860800645 |
| ENAM        | 4q13.3          | 0.01302  | 0.799769 | 0.860896681 |
| EPB42       | 15q15.2         | 0.012992 | 0.800187 | 0.861299466 |
| OR56A4      | 11p15.4         | -0.01298 | 0.800341 | 0.861419639 |
| AP1S1       | 7q22.1          | 0.012971 | 0.800499 | 0.861542878 |
| ZMPSTE24    | 1p34.2          | 0.012949 | 0.800833 | 0.861855901 |
| RBMY2EP     | Yq11.223        | 0.012946 | 0.80088  | 0.861858143 |
| NOC2LP2     | 2q21.1          | -0.01294 | 0.800943 | 0.861858143 |
| RPGRIP1     | 14q11.2         | 0.012939 | 0.800983 | 0.861858143 |
| LHX1        | 17q12           | 0.012938 | 0.801007 | 0.861858143 |
| FAM205BP    | 9p13.3          | 0.012913 | 0.801378 | 0.862211031 |
| TDRD10      | 1q21.3          | -0.0129  | 0.801567 | 0.862334031 |

|           |               |          |          |             |
|-----------|---------------|----------|----------|-------------|
| NETO2     | 16q12.1       | -0.0129  | 0.801578 | 0.862334031 |
| GHSR      | 3q26.31       | 0.012894 | 0.801656 | 0.862371274 |
| CARD18    | 11q22.3       | -0.01288 | 0.801808 | 0.862446212 |
| PLEKHA1   | 10q26.13      | 0.012884 | 0.801812 | 0.862446212 |
| MIR9-3HG  | 15q26.1       | 0.01287  | 0.80203  | 0.862634319 |
| TMED10P1  | 8q24.3        | -0.01285 | 0.802353 | 0.862896696 |
| INTS6L    | Xq26.3        | 0.012848 | 0.80236  | 0.862896696 |
| KRTAP19-5 | 21q22.11      | -0.01284 | 0.802412 | 0.862906489 |
| LOC646471 | 1p36.11       | 0.012835 | 0.802545 | 0.863002833 |
| CORO1B    | 11q13.2       | -0.01283 | 0.802697 | 0.863120422 |
| HES1      | 3q29          | -0.01282 | 0.802743 | 0.86312291  |
| ARPC3     | 12q24.11      | 0.012817 | 0.802821 | 0.863160275 |
| C1ORF68   | 1q21.3        | -0.01281 | 0.802957 | 0.863260451 |
| SHFL      | 19p13.2       | -0.0128  | 0.803064 | 0.863329159 |
| TMEM69    | 1p34.1        | -0.01279 | 0.803161 | 0.86338744  |
| PRLR      | 5p13.2        | 0.012787 | 0.803275 | 0.863463154 |
| ADCYAP1   | 18p11.32      | -0.01278 | 0.80336  | 0.863508667 |
| SCN9A     | 2q24.3        | -0.01277 | 0.803594 | 0.863713948 |
| AADACP1   | 3q25.1        | 0.012758 | 0.803716 | 0.863798335 |
| PTH       | 11p15.3       | 0.012745 | 0.803907 | 0.86395762  |
| KCNJ13    | 2q37.1        | 0.012709 | 0.804454 | 0.864498536 |
| ZNF274    | 19q13.43      | -0.01271 | 0.804508 | 0.864510205 |
| SIAH3     | 13q14.13      | -0.01269 | 0.804684 | 0.86465348  |
| CASC1     | 12p12.1       | 0.012685 | 0.804806 | 0.864737829 |
| RAB3C     | 5q11.2        | -0.01268 | 0.804907 | 0.864800271 |
| OR7E91P   | 2p13.3        | -0.01267 | 0.805036 | 0.864890291 |
| DEPP1     | 10q11.21      | 0.012667 | 0.805077 | 0.864890291 |
| ARFIP2    | 11p15.4       | -0.01265 | 0.805413 | 0.865204847 |
| ZNF225    | 19q13.31      | -0.01262 | 0.805758 | 0.865528105 |
| ZNF747    | 16p11.2       | -0.01262 | 0.805813 | 0.865529437 |
| ZBED3     | 5q13.3        | 0.012617 | 0.805845 | 0.865529437 |
| CCDC70    | 13q14.3       | -0.01261 | 0.805899 | 0.86554064  |
| PRR22     | 19p13.3       | 0.012596 | 0.806157 | 0.865771382 |
| TMEM139   | 7q34          | 0.012585 | 0.806316 | 0.865895834 |
| CRLF3     | 17q11.2       | 0.012569 | 0.806556 | 0.866107467 |
| TBC1D2B   | 15q24.3-q25.1 | -0.01253 | 0.807196 | 0.86674809  |
| TTYH3     | 7p22.3        | 0.012523 | 0.807251 | 0.866760914 |
| SOX9      | 17q24.3       | -0.0125  | 0.807576 | 0.867034176 |
| CCL14     | 17q12         | -0.0125  | 0.807593 | 0.867034176 |
| BAHCC1    | 17q25.3       | 0.012493 | 0.807716 | 0.867120243 |
| BECN1     | 17q21.31      | 0.012465 | 0.808125 | 0.867513229 |
| OR52L1    | 11p15.4       | -0.01243 | 0.80864  | 0.868019123 |
| A1CF      | 10q11.23      | 0.012424 | 0.808751 | 0.868091572 |
| PPP2R3C   | 14q13.2       | -0.01241 | 0.808941 | 0.868125689 |
| CHD2      | 15q26.1       | -0.01241 | 0.80897  | 0.868125689 |
| ATRNL1    | 10q25.3       | -0.01241 | 0.808976 | 0.868125689 |
| MORN4     | 10q24.2       | 0.012408 | 0.808987 | 0.868125689 |
| CGB8      | 19q13.33      | -0.01241 | 0.808999 | 0.868125689 |
| VN1R10P   | 6p22.1        | -0.01239 | 0.809215 | 0.868310762 |
| POTEM     | 14q11.2       | -0.01238 | 0.809427 | 0.868491488 |
| CCL1      | 17q12         | 0.01237  | 0.809569 | 0.868564103 |
| INTU      | 4q28.1        | 0.012369 | 0.809581 | 0.868564103 |
| SLC5A9    | 1p33          | -0.01236 | 0.809646 | 0.868587325 |
| PTPRQ     | 12q21.31      | 0.012328 | 0.810195 | 0.86912972  |
| TMEM202   | 15q23-q24.1   | -0.01231 | 0.810449 | 0.869354913 |
| CLCN4     | Xp22.2        | -0.01227 | 0.811103 | 0.870010242 |
| LYPLAL1   | 1q41          | -0.01226 | 0.81124  | 0.870068957 |
| LINC00271 | 6q23.3        | -0.01226 | 0.811256 | 0.870068957 |

|           |                |          |          |             |
|-----------|----------------|----------|----------|-------------|
| ADIG      | 20q11.23       | -0.01226 | 0.811288 | 0.870068957 |
| REC114    | 15q24.1        | -0.01225 | 0.811445 | 0.870190052 |
| SMC3      | 10q25.2        | -0.01223 | 0.811702 | 0.870419083 |
| NHEJ1     | 2q35           | -0.01222 | 0.811906 | 0.870592229 |
| FKBP2     | 11q13.1        | 0.012208 | 0.812011 | 0.870657237 |
| DENND4C   | 9p22.1         | -0.0122  | 0.812134 | 0.870743169 |
| METAP2    | 12q22          | 0.012195 | 0.812216 | 0.870783754 |
| MIOX      | 22q13.33       | 0.012182 | 0.812402 | 0.870936878 |
| FLNC      | 7q32.1         | 0.012174 | 0.812528 | 0.87098409  |
| PRXL2A    | 10q23.1        | -0.01217 | 0.81257  | 0.87098409  |
| SNX14     | 6q14.3         | 0.01217  | 0.812593 | 0.87098409  |
| C4ORF51   | 4q31.21        | -0.01216 | 0.812674 | 0.87098409  |
| KRTAP10-1 | 21q22.3        | 0.012163 | 0.812687 | 0.87098409  |
| DCLRE1A   | 10q25.3        | -0.01216 | 0.812707 | 0.87098409  |
| SLC8A1    | 2p22.1         | -0.01216 | 0.812759 | 0.870993276 |
| SHOC1     | 9q31.3         | -0.01215 | 0.812899 | 0.871068571 |
| DEFB125   | 20p13          | -0.01215 | 0.812916 | 0.871068571 |
| CCDC88A   | 2p16.1         | 0.012139 | 0.813055 | 0.871170751 |
| MXD4      | 4p16.3         | 0.012122 | 0.813312 | 0.871399609 |
| SAMD13    | 1p31.1         | -0.01211 | 0.813512 | 0.87156742  |
| DDX59     | 1q32.1         | -0.0121  | 0.813683 | 0.871703866 |
| CYB5R3    | 22q13.2        | 0.012076 | 0.814005 | 0.872002441 |
| SPRED3    | 19q13.2        | -0.01206 | 0.814224 | 0.872190389 |
| CECR2     | 22q11.1-q11.21 | 0.012058 | 0.814276 | 0.872191987 |
| ARSD      | Xp22.33        | 0.012055 | 0.814328 | 0.872191987 |
| HIST1H4A  | 6p22.2         | 0.012049 | 0.814414 | 0.872191987 |
| HIST1H2AM | 6p22.1         | -0.01205 | 0.814435 | 0.872191987 |
| TRIM68    | 11p15.4        | 0.012046 | 0.814468 | 0.872191987 |
| EZH2      | 7q36.1         | -0.01204 | 0.814487 | 0.872191987 |
| HIGD2B    | 15q24.1        | 0.012023 | 0.814814 | 0.872495035 |
| DNAJC5B   | 8q13.1         | 0.012004 | 0.815091 | 0.872739371 |
| UBE2U     | 1p31.3         | -0.012   | 0.815129 | 0.872739371 |
| CALR      | 19p13.13       | 0.011996 | 0.81522  | 0.872789809 |
| KLHL18    | 3p21.31        | 0.011992 | 0.815275 | 0.872802417 |
| PMF1      | 1q22           | -0.01199 | 0.815379 | 0.872867316 |
| CLEC4GP1  | 19p13.2        | -0.01198 | 0.815426 | 0.87287021  |
| OR2J3     | 6p22.1         | -0.01198 | 0.815504 | 0.872907995 |
| LSM12     | 17q21.31       | -0.01196 | 0.81579  | 0.873166569 |
| KIAA0087  | 7p15.2         | -0.01195 | 0.815865 | 0.873200914 |
| OR52B6    | 11p15.4        | -0.01195 | 0.815946 | 0.873240283 |
| CLEC2B    | 12p13.31       | -0.01193 | 0.816226 | 0.873493666 |
| URAD      | 13q12.2        | -0.01192 | 0.81631  | 0.873537101 |
| HHLA1     | 8q24.22        | 0.011901 | 0.816655 | 0.873833837 |
| FAM138D   | 12p13.33       | 0.0119   | 0.816675 | 0.873833837 |
| OR4C15    | 11q11          | 0.011896 | 0.816728 | 0.873844173 |
| SLITRK5   | 13q31.2        | 0.011887 | 0.816865 | 0.873903741 |
| DPP9      | 19p13.3        | 0.011887 | 0.816871 | 0.873903741 |
| DDHD2     | 8p11.23        | -0.01187 | 0.817122 | 0.874125432 |
| SH2D3C    | 9q34.11        | -0.01186 | 0.817282 | 0.874249525 |
| TMEM131L  | 4q31.3         | -0.01183 | 0.81766  | 0.874607133 |
| TCERG1    | 5q32           | -0.01183 | 0.817731 | 0.874637114 |
| KLRA1P    | 12p13.2        | 0.011789 | 0.818347 | 0.875249186 |
| TMC6      | 17q25.3        | 0.01178  | 0.818487 | 0.875350071 |
| ZIC3      | Xq26.3         | -0.01178 | 0.818529 | 0.875350071 |
| SNORA47   | 5q13.3         | -0.01176 | 0.818779 | 0.875570833 |
| STARD10   | 11q13.4        | 0.011724 | 0.819338 | 0.876121934 |
| CELFL1    | 11p11.2        | -0.01171 | 0.819602 | 0.87635754  |
| TNXB      | 6p21.33-p21.32 | -0.01169 | 0.819834 | 0.876558278 |



|            |                       |          |          |             |
|------------|-----------------------|----------|----------|-------------|
| HSDL2      | 9q32                  | 0.011681 | 0.819981 | 0.876668366 |
| SRSF8      | 11q21                 | -0.01167 | 0.82015  | 0.876802853 |
| CCR1       | 3p21.31               | -0.01165 | 0.820447 | 0.877073303 |
| ATXN7L1    | 7q22.3                | -0.01164 | 0.820659 | 0.877253092 |
| CENPH      | 5q13.2                | -0.01163 | 0.820708 | 0.877258576 |
| UTP14C     | 13q14.3               | -0.01163 | 0.82078  | 0.877288452 |
| IFIT5      | 10q23.31              | 0.011614 | 0.821001 | 0.877478692 |
| REV3L      | 6q21                  | 0.011609 | 0.82107  | 0.877505074 |
| OR14I1     | 1q44                  | 0.011595 | 0.821287 | 0.877690646 |
| AHCTF1     | 1q44                  | 0.011586 | 0.821419 | 0.877784426 |
| COX11      | 17q22                 | -0.01158 | 0.821579 | 0.877908406 |
| LRRC56     | 11p15.5               | -0.01156 | 0.821752 | 0.878046325 |
| TRIM43     | 2q11.1                | 0.011555 | 0.821889 | 0.878146581 |
| SUSD2      | 22q11.23              | 0.011549 | 0.82199  | 0.878207108 |
| C10ORF120  | 10q26.13              | 0.011528 | 0.822309 | 0.878482908 |
| RPS6KB1    | 17q23.1               | -0.01153 | 0.822336 | 0.878482908 |
| RAB42      | 1p35.3                | 0.011517 | 0.822476 | 0.878585941 |
| OPN4       | 10q23.2               | -0.01151 | 0.82259  | 0.878661233 |
| MOG        | 6p22.1                | 0.011503 | 0.822685 | 0.878689356 |
| LINC01140  | 1p22.3                | 0.011502 | 0.822705 | 0.878689356 |
| SH3BGRL    | Xq21.1                | -0.01148 | 0.823067 | 0.879029394 |
| UCP2       | 11q13.4               | 0.011461 | 0.823318 | 0.879204034 |
| C2ORF69    | 2q33.1                | 0.011461 | 0.823318 | 0.879204034 |
| NOTCH2NLA  | 1q21.1                | -0.01145 | 0.823475 | 0.87932446  |
| TTC31      | 2p13.1                | -0.01143 | 0.823752 | 0.879573848 |
| NGB        | 14q24.3               | -0.01143 | 0.823864 | 0.879646391 |
| CYP4F8     | 19p13.12              | -0.01142 | 0.823935 | 0.879675096 |
| RMI2       | 16p13.13              | -0.01142 | 0.824004 | 0.879678165 |
| GGT3P      | 22q11.21              | -0.01141 | 0.824053 | 0.879678165 |
| ATOH7      | 10q21.3 10q21.3-q22.1 | -0.01141 | 0.82407  | 0.879678165 |
| RIMS1      | 6q13                  | -0.0114  | 0.824194 | 0.879763885 |
| FIGLA      | 2p13.3                | 0.011399 | 0.824255 | 0.879782037 |
| HELZ       | 17q24.2               | 0.01139  | 0.824392 | 0.879881807 |
| ZNF224     | 19q13.31              | -0.01137 | 0.82474  | 0.88020604  |
| SCN11A     | 3p22.2                | -0.01136 | 0.824898 | 0.880327592 |
| F9         | Xq27.1                | -0.01133 | 0.825286 | 0.880661579 |
| SFTA1P     | 10p14                 | -0.01133 | 0.825333 | 0.880661579 |
| OLIG2      | 21q22.11              | 0.011328 | 0.825343 | 0.880661579 |
| TEX36      | 10q26.13              | 0.011323 | 0.825406 | 0.880682085 |
| DERA       | 12p12.3               | -0.01128 | 0.826084 | 0.881315117 |
| HACD1      | 10p12.33              | -0.01128 | 0.826087 | 0.881315117 |
| SNORA77    | 1q32.1                | 0.011271 | 0.826209 | 0.881398284 |
| CDA        | 1p36.12               | 0.011265 | 0.826296 | 0.881444253 |
| GGCX       | 2p11.2                | -0.01125 | 0.826486 | 0.881590799 |
| ZNF467     | 7q36.1                | 0.01125  | 0.826522 | 0.881590799 |
| SLC9C1     | 3q13.2                | -0.01124 | 0.826637 | 0.881667105 |
| UMODL1-AS1 | 21q22.3               | -0.01124 | 0.826709 | 0.881697219 |
| RNPC3      | 1p21.1                | -0.01123 | 0.826799 | 0.881741258 |
| VAR52      | 6p21.33               | 0.011228 | 0.826848 | 0.881741258 |
| NPHP3-AS1  | 3q22.1                | 0.011226 | 0.826883 | 0.881741258 |
| COL4A3     | 2q36.3                | 0.011221 | 0.826966 | 0.881782804 |
| BTG4       | 11q23.1               | 0.011214 | 0.827067 | 0.881843613 |
| TEX55      | 3q13.32               | 0.011211 | 0.827116 | 0.881848541 |
| CRY1       | 12q23.3               | 0.011196 | 0.827335 | 0.882035794 |
| CARNS1     | 11q13.2               | 0.011177 | 0.827633 | 0.882305866 |
| SH3D21     | 1p34.3                | 0.011173 | 0.827688 | 0.882318126 |
| FAAH       | 1p33                  | 0.01117  | 0.827734 | 0.882319935 |
| GRM1       | 6q24.3                | -0.01117 | 0.82781  | 0.882353758 |

|           |          |          |          |             |
|-----------|----------|----------|----------|-------------|
| PRDM14    | 8q13.3   | -0.01115 | 0.828105 | 0.882621112 |
| EDNRB     | 13q22.3  | -0.01112 | 0.828455 | 0.882947159 |
| CIZ1      | 9q34.11  | -0.0111  | 0.828767 | 0.883232882 |
| POFUT2    | 21q22.3  | -0.01108 | 0.829126 | 0.883569111 |
| ENDOU     | 12q13.11 | 0.011069 | 0.829276 | 0.883681915 |
| ROBO3     | 11q24.2  | 0.011063 | 0.829362 | 0.883692841 |
| ARID5B    | 10q21.2  | -0.01106 | 0.829375 | 0.883692841 |
| YY2       | Xp22.12  | 0.011054 | 0.829493 | 0.883771239 |
| BLM       | 15q26.1  | -0.01104 | 0.829715 | 0.883961109 |
| NPM1      | 5q35.1   | 0.011012 | 0.830134 | 0.884344316 |
| EIF4A3    | 17q25.3  | -0.01101 | 0.830163 | 0.884344316 |
| ATG14     | 14q22.3  | -0.011   | 0.830317 | 0.88446101  |
| MRPL24    | 1q23.1   | 0.010989 | 0.830483 | 0.884591633 |
| ACAT1     | 11q22.3  | -0.01098 | 0.830618 | 0.884669374 |
| BPIFB4    | 20q11.21 | 0.010973 | 0.830726 | 0.884669374 |
| FEN1      | 11q12.2  | 0.010971 | 0.830758 | 0.884669374 |
| TRAF4     | 17q11.2  | 0.010971 | 0.830765 | 0.884669374 |
| ADHFE1    | 8q13.1   | -0.01097 | 0.830777 | 0.884669374 |
| ADGRV1    | 5q14.3   | -0.01096 | 0.830897 | 0.884749664 |
| DKK4      | 8p11.21  | 0.010945 | 0.831148 | 0.884969649 |
| AP3M1     | 10q22.2  | 0.010934 | 0.831324 | 0.885110441 |
| DBNL      | 7p13     | 0.010916 | 0.831589 | 0.885345507 |
| SYNGR1    | 22q13.1  | -0.01091 | 0.831654 | 0.885368093 |
| SCART1    | 10q26.3  | 0.010876 | 0.832207 | 0.885884528 |
| KCNG4     | 16q24.1  | 0.010874 | 0.832228 | 0.885884528 |
| ARHGEF10L | 1p36.13  | 0.01087  | 0.832286 | 0.885899092 |
| LINC00667 | 18p11.31 | -0.01085 | 0.832603 | 0.886189857 |
| C1ORF194  | 1p13.3   | -0.01085 | 0.832664 | 0.886206839 |
| LINC01091 | 4q28.1   | 0.010826 | 0.83296  | 0.88647527  |
| OTOS      | 2q37.3   | 0.010804 | 0.833302 | 0.886753116 |
| ADAM7     | 8p21.2   | -0.0108  | 0.83331  | 0.886753116 |
| GRIA4     | 11q22.3  | -0.01078 | 0.833625 | 0.887041243 |
| ALKAL2    | 2p25.3   | 0.010772 | 0.833783 | 0.887162524 |
| BICRAL    | 6p21.1   | -0.01076 | 0.833926 | 0.887267196 |
| COL19A1   | 6q13     | 0.010758 | 0.833998 | 0.887297203 |
| EPB41L4B  | 9q31.3   | 0.010748 | 0.834148 | 0.88732942  |
| SOX2      | 3q26.33  | -0.01075 | 0.834151 | 0.88732942  |
| MTO1      | 6q13     | 0.010747 | 0.834161 | 0.88732942  |
| PLEKHH3   | 17q21.2  | 0.010742 | 0.834233 | 0.887358904 |
| RP2       | Xp11.3   | 0.010733 | 0.834378 | 0.887435021 |
| OR2A25    | 7q35     | -0.01073 | 0.834394 | 0.887435021 |
| ZCWPW2    | 3p24.1   | 0.010723 | 0.834525 | 0.887495854 |
| TDRD9     | 14q32.33 | -0.01072 | 0.834559 | 0.887495854 |
| GALC      | 14q31.3  | 0.010719 | 0.834584 | 0.887495854 |
| CDC42SE1  | 1q21.3   | -0.01071 | 0.834731 | 0.887605408 |
| SKINT1L   | 1p33     | 0.010697 | 0.834929 | 0.887768748 |
| GPN3      | 12q24.11 | -0.01069 | 0.835042 | 0.887841908 |
| PDE6C     | 10q23.33 | 0.010684 | 0.835118 | 0.887875694 |
| CDCP2     | 1p32.3   | -0.01067 | 0.83527  | 0.887990255 |
| SNORA53   | 12q23.1  | 0.010665 | 0.835409 | 0.888090598 |
| FITM1     | 14q12    | 0.010659 | 0.835497 | 0.888100591 |
| RNPEPL1   | 2q37.3   | 0.010659 | 0.835507 | 0.888100591 |
| GLP2R     | 17p13.1  | 0.010648 | 0.835667 | 0.888221856 |
| TAS2R50   | 12p13.2  | -0.01064 | 0.835735 | 0.888221856 |
| ATG16L2   | 11q13.4  | 0.010641 | 0.835773 | 0.888221856 |
| NAA60     | 16p13.3  | -0.01064 | 0.835799 | 0.888221856 |
| SERTAD3   | 19q13.2  | -0.01061 | 0.836283 | 0.888689876 |
| USP32P1   | 17p11.2  | -0.0106  | 0.836356 | 0.888719302 |

|            |                 |          |          |             |
|------------|-----------------|----------|----------|-------------|
| GSG1L      | 16p12.1         | -0.0106  | 0.836459 | 0.888781578 |
| CREB3L3    | 19p13.3         | 0.010589 | 0.836564 | 0.888846977 |
| ESRRB      | 14q24.3         | 0.010581 | 0.836687 | 0.88893012  |
| TIAL1      | 10q26.11        | -0.01057 | 0.836929 | 0.88913979  |
| ATAD3A     | 1p36.33         | -0.01056 | 0.83706  | 0.889231846 |
| GAGE2E     | Xp11.23         | 0.01055  | 0.83716  | 0.889291387 |
| EGFEM1P    | 3q26.2          | -0.01054 | 0.837265 | 0.889355541 |
| PCSK2      | 20p12.1         | -0.01051 | 0.837794 | 0.889870544 |
| MIR600HG   | 9q33.3          | 0.010499 | 0.837938 | 0.889903533 |
| CDH20      | 18q21.33        | 0.010495 | 0.837991 | 0.889903533 |
| ASIC5      | 4q32.1          | -0.01049 | 0.838026 | 0.889903533 |
| KCNQ1DN    | 11p15.4 11p15.5 | -0.01049 | 0.838033 | 0.889903533 |
| COQ10A     | 12q13.3         | 0.01049  | 0.838076 | 0.889903533 |
| HOXB3      | 17q21.32        | 0.010489 | 0.838092 | 0.889903533 |
| NLRP1      | 17p13.2         | -0.01049 | 0.838138 | 0.889905069 |
| GRM4       | 6p21.31         | -0.01047 | 0.838332 | 0.890064279 |
| FGF7P6     | 9q13            | 0.010469 | 0.838386 | 0.890074294 |
| FCGR1CP    | 1q21.1          | -0.01047 | 0.838441 | 0.890085378 |
| GEMIN2     | 14q21.1         | 0.010456 | 0.83859  | 0.890170209 |
| CRYBG2     | 1p36.11         | -0.01045 | 0.83861  | 0.890170209 |
| SAA1       | 11p15.1         | -0.01044 | 0.838775 | 0.890298716 |
| CHAD       | 17q21.33        | 0.010419 | 0.839149 | 0.890648066 |
| HPCAL1     | 2p25.1          | 0.010399 | 0.839462 | 0.890933239 |
| PTCD2      | 5q13.2          | -0.0104  | 0.839511 | 0.890938216 |
| ANKRD30A   | 10p11.21        | -0.01039 | 0.839666 | 0.890968082 |
| OR52B2     | 11p15.4         | 0.010385 | 0.839672 | 0.890968082 |
| SLC46A1    | 17q11.2         | 0.010381 | 0.839728 | 0.890968082 |
| TMOD1      | 9q22.33         | -0.01038 | 0.839751 | 0.890968082 |
| LAT        | 16p11.2         | -0.01038 | 0.839774 | 0.890968082 |
| PPFIBP2    | 11p15.4         | -0.01038 | 0.839806 | 0.890968082 |
| GHRL       | 3p25.3          | -0.01036 | 0.840066 | 0.891195785 |
| PACRG-AS1  | 6q26            | 0.010346 | 0.840268 | 0.891337791 |
| PRDX6      | 1q25.1          | 0.010345 | 0.840288 | 0.891337791 |
| CYP4A22    | 1p33            | 0.01033  | 0.840517 | 0.891533089 |
| MTCL1      | 18p11.22        | 0.010324 | 0.840603 | 0.891577277 |
| HAO1       | 20p12.3         | 0.01032  | 0.840667 | 0.891597983 |
| TM4SF19    | 3q29            | -0.01031 | 0.840826 | 0.891706904 |
| OLFM1      | 9q34.3          | -0.01031 | 0.840859 | 0.891706904 |
| SNORA2B    | 12q13.11        | -0.0103  | 0.840931 | 0.891736134 |
| CGB2       | 19q13.33        | -0.01029 | 0.841095 | 0.891863163 |
| RNF19A     | 8q22.2          | 0.01027  | 0.841417 | 0.892156476 |
| RBMXL2     | 11p15.4         | -0.01026 | 0.841575 | 0.892276703 |
| FRMPD2B    | 10q11.22        | 0.010256 | 0.841631 | 0.892289761 |
| KLK7       | 19q13.41        | -0.01025 | 0.841727 | 0.89231182  |
| ADGRG3     | 16q21           | 0.010249 | 0.841741 | 0.89231182  |
| CXCR1      | 2q35            | 0.010217 | 0.842239 | 0.892791674 |
| CLDN14     | 21q22.13        | -0.01021 | 0.842384 | 0.892898921 |
| HS3ST2     | 16p12.2         | 0.010199 | 0.842504 | 0.892978312 |
| ABCB6      | 2q35            | -0.01019 | 0.842598 | 0.893030449 |
| SPATA31D5P | 9q21.32         | -0.01019 | 0.842665 | 0.893054649 |
| ATP13A1    | 19p13.11        | 0.010185 | 0.842713 | 0.893057638 |
| PTCHD4     | 6p12.3          | 0.010172 | 0.84291  | 0.893219279 |
| MAPT-IT1   | 17q21.31        | 0.010169 | 0.842969 | 0.893235073 |
| AGBL3      | 7q33            | 0.010123 | 0.843662 | 0.893921749 |
| ADAD2      | 16q24.1         | -0.01012 | 0.843742 | 0.893958928 |
| TTY1B      | Yp11.2          | -0.01011 | 0.843831 | 0.894006552 |
| PER4       | 7p21.3          | -0.0101  | 0.843977 | 0.89411393  |
| UPK1A      | 19q13.12        | -0.0101  | 0.844048 | 0.894141977 |

|           |               |          |          |             |
|-----------|---------------|----------|----------|-------------|
| LOC729603 | 6q25.3        | -0.01008 | 0.844357 | 0.894421415 |
| MYCBP2    | 13q22.3       | 0.010073 | 0.844432 | 0.894454087 |
| ZNF286B   | 17p11.2       | -0.01005 | 0.844721 | 0.894712736 |
| C18ORF54  | 18q21.2       | 0.010046 | 0.844836 | 0.894775697 |
| CCL17     | 16q21         | -0.01004 | 0.84487  | 0.894775697 |
| TMEM14EP  | 3q25.2        | -0.01004 | 0.844925 | 0.894787126 |
| FOXD2-AS1 | 1p33          | -0.01001 | 0.84542  | 0.89526404  |
| SERPINE3  | 13q14.3       | 0.009996 | 0.845606 | 0.895403939 |
| MC4R      | 18q21.32      | -0.00999 | 0.845642 | 0.895403939 |
| PRSS37    | 7q34          | -0.00998 | 0.845848 | 0.895574452 |
| CYP11B1   | 8q24.3        | 0.009955 | 0.846222 | 0.895923653 |
| SLC25A29  | 14q32.2       | 0.009948 | 0.846337 | 0.895997331 |
| EGR4      | 2p13.2        | 0.009943 | 0.846416 | 0.896034121 |
| ARL5C     | 17q12         | -0.00993 | 0.846628 | 0.896181173 |
| CXADRP3   | 18p11.21      | 0.009924 | 0.846699 | 0.896181173 |
| C2ORF70   | 2p23.3        | -0.00992 | 0.846727 | 0.896181173 |
| LLPH      | 12q14.3       | 0.009922 | 0.846734 | 0.896181173 |
| SEC61B    | 9q22.33       | 0.0099   | 0.847066 | 0.896484909 |
| OSM       | 22q12.2       | -0.00989 | 0.847227 | 0.896593347 |
| TCP10L    | 21q22.11      | 0.009887 | 0.847258 | 0.896593347 |
| SLC44A5   | 1p31.1        | -0.00988 | 0.847309 | 0.896597835 |
| TRIB1     | 8q24.13       | -0.00988 | 0.847351 | 0.896597835 |
| TMX4      | 20p12.3       | -0.00987 | 0.847493 | 0.896699922 |
| NPAP1     | 15q11.2       | 0.009864 | 0.847618 | 0.896751153 |
| CCT8      | 21q21.3       | 0.009863 | 0.847631 | 0.896751153 |
| SUPT16H   | 14q11.2       | 0.009853 | 0.847785 | 0.896867127 |
| RTL9      | Xq23          | -0.00984 | 0.847958 | 0.897002915 |
| PTGDS     | 9q34.3        | -0.00983 | 0.848169 | 0.897155935 |
| GAB1      | 4q31.21       | 0.009826 | 0.848192 | 0.897155935 |
| FBXW7     | 4q31.3        | 0.00982  | 0.848284 | 0.897205857 |
| KHDC1     | 6q13          | -0.0098  | 0.848647 | 0.897542363 |
| LDLRAD4   | 18p11.21      | -0.00977 | 0.848981 | 0.897847819 |
| SLC19A1   | 21q22.3       | -0.00977 | 0.849047 | 0.897867682 |
| LSM1      | 8p11.23       | 0.009767 | 0.84909  | 0.897867682 |
| NPHS1     | 19q13.12      | 0.009746 | 0.849423 | 0.898172707 |
| SPATA19   | 11q25         | -0.00974 | 0.849528 | 0.898191094 |
| SACS      | 13q12.12      | -0.00974 | 0.84953  | 0.898191094 |
| CLIC1     | 6p21.33       | -0.00974 | 0.849579 | 0.8981958   |
| RRP1B     | 21q22.3       | 0.009726 | 0.849727 | 0.898304747 |
| ZNF732    | 4p16.3        | -0.00972 | 0.849796 | 0.898330069 |
| GPR78     | 4p16.1        | 0.009708 | 0.850003 | 0.89846829  |
| DOCK9     | 13q32.3       | 0.009705 | 0.850043 | 0.89846829  |
| OR2B3     | 6p22.1        | -0.0097  | 0.850061 | 0.89846829  |
| ABCA6     | 17q24.2-q24.3 | -0.00968 | 0.850486 | 0.898869531 |
| PP2D1     | 3p24.3        | 0.009667 | 0.85062  | 0.898964025 |
| BEND5     | 1p33          | 0.009659 | 0.850744 | 0.899047619 |
| SNED1     | 2q37.3        | -0.00965 | 0.850927 | 0.899193476 |
| FHL5      | 6q16.1        | -0.0096  | 0.85158  | 0.899835682 |
| STOX2     | 4q35.1        | -0.00959 | 0.851741 | 0.899958946 |
| VPREB1    | 22q11.22      | -0.00955 | 0.852455 | 0.90066597  |
| MYT1L-AS1 | 2p25.3        | -0.00954 | 0.852517 | 0.900683993 |
| MYADM     | 19q13.42      | 0.009532 | 0.852676 | 0.900804511 |
| ZYG11A    | 1p32.3        | -0.00953 | 0.852752 | 0.900836833 |
| SDR16C6P  | 8q12.1        | 0.009524 | 0.852806 | 0.900846353 |
| MGC15885  | 15q22.2       | 0.00951  | 0.853019 | 0.901023832 |
| H3F3C     | 12p11.21      | -0.00951 | 0.853088 | 0.901048755 |
| SLC25A30  | 13q14.13      | 0.009449 | 0.853953 | 0.901915036 |
| LAMB2P1   | 3p21.31       | 0.009443 | 0.854047 | 0.901966497 |

|           |                 |          |          |             |
|-----------|-----------------|----------|----------|-------------|
| LEMD1     | 1q32.1          | -0.00944 | 0.854105 | 0.901980248 |
| ATP1A3    | 19q13.2         | -0.00943 | 0.854219 | 0.902053806 |
| METTL16   | 17p13.3         | 0.009427 | 0.854285 | 0.902075732 |
| FAM237A   | 2q33.3          | 0.009409 | 0.854562 | 0.902320014 |
| TSGA13    | 7q32.2          | -0.0094  | 0.854698 | 0.90241643  |
| LIX1L     | 1q21.1          | 0.009387 | 0.854897 | 0.902579257 |
| EIF4G3    | 1p36.12         | 0.009379 | 0.855026 | 0.902664756 |
| VTI1A     | 10q25.2         | -0.00938 | 0.855068 | 0.902664756 |
| RSF1      | 11q14.1         | -0.00936 | 0.855371 | 0.902936795 |
| GGT1      | 22q11.23        | -0.00931 | 0.856151 | 0.903712625 |
| LRIT3     | 4q25            | 0.009292 | 0.856353 | 0.90382337  |
| OR11H6    | 14q11.2         | -0.00929 | 0.856369 | 0.90382337  |
| ING3      | 7q31.31         | -0.00929 | 0.856391 | 0.90382337  |
| EDRF1     | 10q26.2         | 0.009252 | 0.856964 | 0.90438028  |
| DRAXIN    | 1p36.22         | -0.00921 | 0.857649 | 0.905055121 |
| TEX13B    | Xq22.3          | 0.009189 | 0.857928 | 0.905302336 |
| CST8      | 20p11.21        | 0.00917  | 0.858212 | 0.905554292 |
| ZNF436    | 1p36.12         | 0.009167 | 0.858265 | 0.905562067 |
| TTN       | 2q31.2          | -0.00915 | 0.858486 | 0.90574717  |
| SPAG6     | 10p12.2         | 0.009142 | 0.858643 | 0.905865535 |
| PDE4A     | 19p13.2         | -0.00913 | 0.858808 | 0.905951489 |
| FAM189B   | 1q22            | 0.009131 | 0.858815 | 0.905951489 |
| FANCG     | 9p13.3          | 0.009122 | 0.858957 | 0.905992481 |
| MTMR7     | 8p22            | 0.009121 | 0.858963 | 0.905992481 |
| FAM86B3P  | 8p23.1          | -0.00912 | 0.85899  | 0.905992481 |
| COPS2     | 15q21.1         | -0.00911 | 0.859187 | 0.906153213 |
| ACTRT1    | Xq25            | -0.0091  | 0.859322 | 0.906248112 |
| FER       | 5q21.3          | 0.009092 | 0.859416 | 0.906299208 |
| HOXC11    | 12q13.13        | 0.009071 | 0.859733 | 0.906556777 |
| CCDC62    | 12q24.31        | -0.00907 | 0.859751 | 0.906556777 |
| SERINC1   | 6q22.31         | 0.009058 | 0.859935 | 0.906703163 |
| ZNF544    | 19q13.43        | -0.00905 | 0.860077 | 0.906792691 |
| GALP      | 19q13.43        | -0.00905 | 0.860113 | 0.906792691 |
| SLC9A9    | 3q24            | 0.009043 | 0.860156 | 0.906792691 |
| ZSCAN30   | 18q12.2         | 0.009038 | 0.860241 | 0.906834765 |
| ELSPBP1   | 19q13.33        | -0.00903 | 0.860286 | 0.906834765 |
| HNRNPA1L2 | 13q14.3         | -0.00902 | 0.860535 | 0.907018539 |
| CD5       | 11q12.2         | 0.009018 | 0.860551 | 0.907018539 |
| CALB1     | 8q21.3          | 0.009004 | 0.860756 | 0.907187018 |
| DCAF5     | 14q24.1         | 0.008998 | 0.860854 | 0.907242572 |
| SLC22A15  | 1p13.1          | -0.00898 | 0.861125 | 0.907479601 |
| MCTP1     | 5q15            | 0.008974 | 0.861217 | 0.907529088 |
| FAM13B    | 5q31.2          | 0.008949 | 0.861602 | 0.90788765  |
| C21ORF62  | 21q22.11        | -0.00894 | 0.861795 | 0.907925725 |
| IMMT      | 2p11.2 2        | -0.00893 | 0.861823 | 0.907925725 |
| OR1B1     | 9q33.2          | -0.00893 | 0.861889 | 0.907925725 |
| EIF4H     | 7q11.23         | 0.008924 | 0.861978 | 0.907925725 |
| LHFPL4    | 3p25.3          | 0.008924 | 0.861979 | 0.907925725 |
| MKRN1     | 7q34            | 0.008924 | 0.861982 | 0.907925725 |
| KIAA0556  | 16p12.1         | 0.008923 | 0.861995 | 0.907925725 |
| CCDC93    | 2q14.1          | -0.00892 | 0.862001 | 0.907925725 |
| TPM4      | 19p13.12-p13.11 | -0.00892 | 0.862054 | 0.907933523 |
| LINC02800 | 1p36.11         | 0.008911 | 0.862189 | 0.907989135 |
| INHBC     | 12q13.3         | 0.00891  | 0.862198 | 0.907989135 |
| UCMA      | 10p13           | -0.0089  | 0.862358 | 0.908109971 |
| SNORA5B   | 7p13            | 0.008868 | 0.862837 | 0.908566991 |
| ZPLD1     | 3q12.3          | 0.008854 | 0.863058 | 0.908751596 |
| SLFN14    | 17q12           | -0.00884 | 0.863261 | 0.908917418 |

|           |                     |          |          |             |
|-----------|---------------------|----------|----------|-------------|
| HSF5      | 17q22               | -0.00883 | 0.863479 | 0.909038357 |
| PMCHL1    | 5p14.3              | -0.00882 | 0.863503 | 0.909038357 |
| SCGB1A1   | 11q12.3             | -0.00882 | 0.863512 | 0.909038357 |
| SARS      | 1p13.3              | -0.00881 | 0.863696 | 0.90918455  |
| TMEM190   | 19q13.42            | -0.0088  | 0.863947 | 0.909393895 |
| CNGA4     | 11p15.4             | 0.008789 | 0.864054 | 0.909393895 |
| COQ7      | 16p12.3             | 0.008785 | 0.864108 | 0.909393895 |
| GPR88     | 1p21.2              | 0.008785 | 0.864114 | 0.909393895 |
| C3ORF49   | 3p14.1              | -0.00878 | 0.864122 | 0.909393895 |
| CDNF      | 10p13               | -0.00878 | 0.864184 | 0.909411483 |
| SYNGR3    | 16p13.3             | 0.008769 | 0.864362 | 0.909469397 |
| LOC392196 | 8p23.1              | 0.008768 | 0.864368 | 0.909469397 |
| C1ORF198  | 1q42.2              | -0.00877 | 0.864375 | 0.909469397 |
| NAIP      | 5q13.2              | 0.008758 | 0.864533 | 0.909586284 |
| SSMEM1    | 7q32.2              | 0.008753 | 0.864601 | 0.909586284 |
| UBE2J2    | 1p36.33             | 0.008752 | 0.864622 | 0.909586284 |
| GLYAT     | 11q12.1             | -0.00873 | 0.864916 | 0.909821101 |
| FTMT      | 5q23.1              | 0.00873  | 0.864948 | 0.909821101 |
| SLC43A1   | 11q12.1             | -0.00873 | 0.864982 | 0.909821101 |
| PRIMA1    | 14q32.12            | 0.008723 | 0.865066 | 0.909861527 |
| APOC4     | 19q13.32            | 0.008712 | 0.865236 | 0.909969149 |
| EWSR1     | 22q12.2             | -0.00871 | 0.865259 | 0.909969149 |
| AP2S1     | 19q13.32            | 0.008692 | 0.865539 | 0.910190553 |
| HTR3A     | 11q23.2             | 0.00869  | 0.86556  | 0.910190553 |
| IL31      | 12q24.31            | -0.00868 | 0.865661 | 0.910248426 |
| CAMKK2    | 12q24.31            | 0.008674 | 0.865813 | 0.910360731 |
| NUDT9     | 4q22.1              | -0.00866 | 0.865998 | 0.910462821 |
| PLBD2     | 12q24.13            | 0.008662 | 0.866001 | 0.910462821 |
| FOXB2     | 9q21.2              | -0.00864 | 0.866368 | 0.910769575 |
| HSPA4     | 5q31.1              | 0.008637 | 0.866384 | 0.910769575 |
| IDH2      | 15q26.1             | 0.008626 | 0.866549 | 0.910895179 |
| GPR151    | 5q32                | 0.008616 | 0.866708 | 0.91101424  |
| CFHR1     | 1q31.3              | -0.0086  | 0.867001 | 0.91115758  |
| SNORA31   | 13q14.13            | -0.0086  | 0.867002 | 0.91115758  |
| APOC3     | 11q23.3             | -0.0086  | 0.867006 | 0.91115758  |
| SNAR-C3   | 19q13.33            | -0.00859 | 0.867026 | 0.91115758  |
| DARS2     | 1q25.1              | -0.00857 | 0.86739  | 0.911492602 |
| OSBPL9    | 1p32.3              | 0.00856  | 0.867562 | 0.911609279 |
| FOXI2     | 10q26.2             | -0.00856 | 0.867592 | 0.911609279 |
| CCR10     | 17q21.2             | 0.008536 | 0.867928 | 0.91189583  |
| PID1      | 2q36.3              | -0.00853 | 0.867988 | 0.91189583  |
| NLRP14    | 11p15.4             | 0.008531 | 0.868002 | 0.91189583  |
| A1BG-AS1  | 19q13.43            | -0.00851 | 0.868314 | 0.91217646  |
| NUP210L   | 1q21.3              | -0.00848 | 0.868743 | 0.912578639 |
| RIOK2     | 5q15                | 0.008479 | 0.868796 | 0.912587    |
| SPTLC1    | 9q22.31             | 0.008476 | 0.868852 | 0.912598087 |
| CHIA      | 1p13.2              | 0.008471 | 0.868918 | 0.912613561 |
| ANKRD18DP | 3q29                | 0.008469 | 0.868958 | 0.912613561 |
| PKP4      | 2q24.1              | 0.008465 | 0.869021 | 0.912631323 |
| ADD3      | 10q25.1-q25.2       | 0.008457 | 0.869136 | 0.912704801 |
| CREBBP    | 16p13.3             | -0.00843 | 0.869549 | 0.913090274 |
| THBD      | 20p11.21            | -0.00842 | 0.869661 | 0.913160266 |
| TTLL8     | 22q13.33            | -0.00841 | 0.869841 | 0.913301504 |
| CDC45     | 22q11.21            | 0.008391 | 0.870157 | 0.913431732 |
| TSPAN4    | 11p15.5             | -0.00839 | 0.870157 | 0.913431732 |
| FETUB     | 3q27.3              | 0.008389 | 0.870185 | 0.913431732 |
| ATP1B3    | 3q23                | -0.00839 | 0.870206 | 0.913431732 |
| GTPBP6    | Xp22.33 and Yp11.31 | 0.008386 | 0.870223 | 0.913431732 |

|              |                    |          |          |             |
|--------------|--------------------|----------|----------|-------------|
| SHC1         | 1q21.3             | 0.008385 | 0.870239 | 0.913431732 |
| ADORA2A      | 22q11.23           | 0.00835  | 0.870774 | 0.913945325 |
| SLC24A4      | 14q32.12           | 0.008335 | 0.871016 | 0.914117021 |
| IFNAR2       | 21q22.11           | 0.008333 | 0.871038 | 0.914117021 |
| NAA50        | 3q13.31            | 0.008331 | 0.871075 | 0.914117021 |
| C19ORF71     | 19p13.3            | -0.00833 | 0.871121 | 0.914117634 |
| KCTD14       | 11q14.1            | -0.00832 | 0.871118 | 0.914119497 |
| GOLGA2P6     | 10p11.23           | 0.008319 | 0.871259 | 0.914119497 |
| TFB2M        | 1q44               | -0.00832 | 0.871259 | 0.914119497 |
| NCAPH        | 2q11.2             | -0.00831 | 0.871362 | 0.914179031 |
| DDOST        | 1p36.12            | -0.00828 | 0.871831 | 0.914623169 |
| SGK2         | 20q13.12           | 0.008276 | 0.871923 | 0.91467228  |
| OR2T5        | 1q44               | 0.008262 | 0.872132 | 0.914843713 |
| PRSS1        | 7q34               | -0.00826 | 0.872213 | 0.914879904 |
| TRPM7        | 15q21.2            | -0.00825 | 0.872267 | 0.914888887 |
| CD72         | 9p13.3             | 0.008237 | 0.872516 | 0.915102547 |
| GATA4        | 8p23.1             | 0.008231 | 0.872613 | 0.915156245 |
| TMEM95       | 17p13.1            | -0.00822 | 0.872731 | 0.915231981 |
| ADARB1       | 21q22.3            | 0.008212 | 0.872904 | 0.915365862 |
| CYB561A3     | 11q12.2            | 0.008206 | 0.87299  | 0.915408006 |
| LOC100128573 | 19p13.2            | -0.0082  | 0.873094 | 0.915468487 |
| KCTD11       | 17p13.1            | -0.00818 | 0.873377 | 0.915640029 |
| ANKRD20A3    | 9q21.11            | -0.00818 | 0.873403 | 0.915640029 |
| IGFBP2       | 2q35               | -0.00818 | 0.873407 | 0.915640029 |
| FBLN7        | 2q13-q14.1         | -0.00817 | 0.873486 | 0.915640029 |
| SDCCAG8      | 1q43-q44           | 0.008174 | 0.873486 | 0.915640029 |
| CALHM4       | 6q22.1             | 0.008167 | 0.873594 | 0.915653953 |
| IGFL3        | 19q13.32           | -0.00817 | 0.873613 | 0.915653953 |
| KRT76        | 12q13.13           | 0.008164 | 0.873636 | 0.915653953 |
| LMNTD2       | 11p15.5            | -0.00815 | 0.873797 | 0.915773881 |
| ASMTL        | Xp22.33 and Yp11.2 | -0.00814 | 0.873991 | 0.915792231 |
| HLA-F-AS1    | 6p22.1             | 0.008141 | 0.873995 | 0.915792231 |
| TRIM49       | 11q14.3            | 0.008139 | 0.874012 | 0.915792231 |
| TAAR5        | 6q23.2             | 0.00813  | 0.874152 | 0.915792231 |
| OR2M2        | 1q44               | 0.00813  | 0.874152 | 0.915792231 |
| OR8H1        | 11q12.1            | -0.00813 | 0.874152 | 0.915792231 |
| OR7D2        | 19p13.2            | -0.00813 | 0.87417  | 0.915792231 |
| CACNG7       | 19q13.42           | 0.008126 | 0.874224 | 0.915792231 |
| LOC100130264 | 20p11.23           | 0.008125 | 0.874226 | 0.915792231 |
| UTS2R        | 17q25.3            | -0.00811 | 0.874389 | 0.915915334 |
| PPIL6        | 6q21               | -0.0081  | 0.8746   | 0.916088133 |
| PRDM16-DT    | 1p36.32            | 0.008091 | 0.874751 | 0.916190709 |
| C11ORF52     | 11q23.1            | 0.008086 | 0.874831 | 0.916190709 |
| HVCN1        | 12q24.11           | 0.008083 | 0.874874 | 0.916190709 |
| CAT          | 11p13              | 0.008083 | 0.87488  | 0.916190709 |
| PMCHL2       | 5q13.2             | 0.008065 | 0.875154 | 0.916390645 |
| FFAR1        | 19q13.12           | 0.008064 | 0.875163 | 0.916390645 |
| PPP2R5D      | 6p21.1             | 0.008038 | 0.875568 | 0.916766854 |
| GALR1        | 18q23              | -0.00802 | 0.875825 | 0.916987698 |
| INE2         | Xp22.2             | 0.007988 | 0.876335 | 0.917467512 |
| WDFY1        | 2q36.1             | -0.00799 | 0.876375 | 0.917467512 |
| TESK1        | 9p13.3             | -0.00793 | 0.87729  | 0.918361906 |
| CRLF2        | Xp22.33 and Yp11.2 | 0.007924 | 0.877323 | 0.918361906 |
| RCC1         | 1p35.3             | -0.00792 | 0.877366 | 0.918361906 |
| FANCA        | 16q24.3            | -0.00792 | 0.877413 | 0.918362364 |
| MASP2        | 1p36.22            | -0.0079  | 0.877734 | 0.918626302 |
| TMEM175      | 4p16.3             | -0.0079  | 0.877757 | 0.918626302 |
| ISCU         | 12q23.3            | -0.00788 | 0.877925 | 0.918733685 |

|           |          |          |          |             |
|-----------|----------|----------|----------|-------------|
| TRDN      | 6q22.31  | -0.00787 | 0.878091 | 0.918733685 |
| FOXRED1   | 11q24.2  | -0.00787 | 0.878134 | 0.918733685 |
| DMRTB1    | 1p32.3   | -0.00787 | 0.878163 | 0.918733685 |
| SNORA16A  | 1p35.3   | -0.00787 | 0.878167 | 0.918733685 |
| HTR5A     | 7q36.2   | -0.00787 | 0.878196 | 0.918733685 |
| CTNNAL1   | 9q31.3   | -0.00787 | 0.878197 | 0.918733685 |
| PXK       | 3p14.3   | -0.00786 | 0.878226 | 0.918733685 |
| POTEG     | 14q11.2  | -0.00785 | 0.87846  | 0.918930101 |
| LRRC55    | 11q12.1  | 0.007845 | 0.878532 | 0.91895733  |
| WHRN      | 9q32     | -0.00784 | 0.87863  | 0.918977618 |
| PHC3      | 3q26.2   | -0.00784 | 0.878643 | 0.918977618 |
| TERB1     | 16q22.1  | -0.00783 | 0.878819 | 0.91905892  |
| POU3F3    | 2q12.1   | -0.00783 | 0.878824 | 0.91905892  |
| POM121L2  | 6p22.1   | -0.00782 | 0.878881 | 0.91905892  |
| SKAP2     | 7p15.2   | 0.007821 | 0.878904 | 0.91905892  |
| BCORP1    | Yq11.222 | -0.00781 | 0.879079 | 0.91919365  |
| SUMF1     | 3p26.1   | 0.007803 | 0.879176 | 0.919246552 |
| CA3       | 8q21.2   | -0.00779 | 0.879391 | 0.919423363 |
| MRPL4     | 19p13.2  | -0.00778 | 0.879549 | 0.919526217 |
| AGAP7P    | 10q11.22 | -0.00778 | 0.879581 | 0.919526217 |
| FAM131B   | 7q34     | 0.00777  | 0.879678 | 0.919580236 |
| GLIPR2    | 9p13.3   | -0.00777 | 0.879728 | 0.919584116 |
| C5ORF24   | 5q31.1   | 0.007701 | 0.880749 | 0.920602971 |
| PRAMEF8   | 1p36.21  | -0.0077  | 0.880798 | 0.920606776 |
| HIST1H2BE | 6p22.2   | -0.00769 | 0.880972 | 0.920701551 |
| ATP6V1G3  | 1q31.3   | -0.00769 | 0.880981 | 0.920701551 |
| MAGI2     | 7q21.11  | -0.00768 | 0.881032 | 0.920706476 |
| EFCAB5    | 17q11.2  | 0.007665 | 0.881305 | 0.920929753 |
| CCT8L2    | 22q11.1  | 0.007663 | 0.881337 | 0.920929753 |
| PLEKHN1   | 1p36.33  | -0.00765 | 0.881531 | 0.921071702 |
| GOLGA6C   | 15q24.2  | -0.00765 | 0.881587 | 0.921071702 |
| MIR1-1HG  | 20q13.33 | -0.00764 | 0.881637 | 0.921071702 |
| MPZL2     | 11q23.3  | -0.00764 | 0.881657 | 0.921071702 |
| ICA1      | 7p21.3   | 0.007636 | 0.881746 | 0.921117001 |
| MARVELD1  | 10q24.2  | 0.007619 | 0.882011 | 0.921345525 |
| LTN1      | 21q21.3  | 0.007613 | 0.8821   | 0.921390811 |
| IL13RA2   | Xq23     | -0.00761 | 0.882217 | 0.921464669 |
| FMOD      | 1q32.1   | 0.007601 | 0.882289 | 0.921491743 |
| MT1F      | 16q13    | 0.007593 | 0.882405 | 0.921564673 |
| HTN1      | 4q13.3   | -0.00757 | 0.882692 | 0.921815943 |
| MRAP      | 21q22.11 | 0.007562 | 0.882882 | 0.921925148 |
| ZBTB38    | 3q23     | 0.007562 | 0.882888 | 0.921925148 |
| ZNF845    | 19q13.42 | 0.007551 | 0.883057 | 0.922053356 |
| CCDC117   | 22q12.1  | -0.00754 | 0.883165 | 0.922078182 |
| FNDC3A    | 13q14.2  | -0.00754 | 0.883173 | 0.922078182 |
| TDRD3     | 13q21.2  | -0.00753 | 0.883365 | 0.922230564 |
| ITIH6     | Xp11.22  | 0.007523 | 0.88348  | 0.92230244  |
| ASTL      | 2q11.2   | -0.00752 | 0.883554 | 0.922325105 |
| RELT      | 11q13.4  | 0.007516 | 0.883597 | 0.922325105 |
| RAB3GAP2  | 1q41     | -0.00751 | 0.88364  | 0.922325105 |
| ZC3H6     | 2q14.1   | 0.007508 | 0.883716 | 0.922356511 |
| CDK5RAP2  | 9q33.2   | -0.0075  | 0.883842 | 0.92239564  |
| CAPSL     | 5p13.2   | -0.0075  | 0.883845 | 0.92239564  |
| TTC5      | 14q11.2  | 0.007494 | 0.883924 | 0.922429987 |
| TNFSF13B  | 13q33.3  | 0.007485 | 0.884063 | 0.922527021 |
| POLQ      | 3q13.33  | -0.00746 | 0.884527 | 0.922962645 |
| CPAMD8    | 19p13.11 | 0.007441 | 0.884737 | 0.923133939 |
| ANKRD20A4 | 9q13     | 0.00743  | 0.88491  | 0.923266458 |



|           |              |          |          |             |
|-----------|--------------|----------|----------|-------------|
| KRTAP10-5 | 21q22.3      | -0.0074  | 0.885329 | 0.923655584 |
| ZHX3      | 20q12        | -0.0074  | 0.885381 | 0.923661611 |
| GLYR1     | 16p13.3      | -0.00738 | 0.885673 | 0.923917517 |
| MYO9B     | 19p13.11     | 0.007377 | 0.885732 | 0.923931579 |
| PAPPA2    | 1q25.2       | 0.007372 | 0.885798 | 0.923952295 |
| PPP3R1    | 2p14         | 0.007364 | 0.885921 | 0.924032242 |
| TIPIN     | 15q22.31     | -0.00736 | 0.885971 | 0.924035934 |
| APOM      | 6p21.33      | -0.00733 | 0.886421 | 0.924457596 |
| C1ORF162  | 1p13.2       | 0.007327 | 0.886494 | 0.924464418 |
| HBG2      | 11p15.4      | -0.00733 | 0.88652  | 0.924464418 |
| FOLH1B    | 11q14.3      | -0.0073  | 0.88693  | 0.924842066 |
| IQCF2     | 3p21.2       | -0.0073  | 0.886979 | 0.924842066 |
| FAM107A   | 3p14.3-p14.2 | -0.00729 | 0.887021 | 0.924842066 |
| NPHP4     | 1p36.31      | 0.007276 | 0.887276 | 0.925059868 |
| TUBA3E    | 2q21.1       | 0.007267 | 0.887426 | 0.925167752 |
| USP25     | 21q21.1      | -0.00726 | 0.887498 | 0.925194952 |
| EFNB1     | Xq13.1       | 0.007234 | 0.887935 | 0.925496142 |
| GH2       | 17q23.3      | 0.007232 | 0.887954 | 0.925496142 |
| TTC41P    | 12q23.3      | 0.007231 | 0.88797  | 0.925496142 |
| SETD2     | 3p21.31      | -0.00723 | 0.887972 | 0.925496142 |
| IDNK      | 9q21.32      | 0.007221 | 0.888127 | 0.925610275 |
| OR11H1    | 22q11.1      | 0.007201 | 0.888435 | 0.925882919 |
| ACAD10    | 12q24.12     | 0.007196 | 0.888512 | 0.925914482 |
| NPC2      | 14q24.3      | 0.007181 | 0.88875  | 0.926114914 |
| KAAG1     | 6p22.3       | 0.007169 | 0.888931 | 0.926254822 |
| CARD19    | 9q22.31      | -0.00716 | 0.889138 | 0.926422518 |
| PLBD1     | 12p13.1      | 0.007137 | 0.88942  | 0.926667807 |
| AMFR      | 16q13        | -0.00713 | 0.889572 | 0.926740831 |
| SNX8      | 7p22.3       | 0.007126 | 0.889595 | 0.926740831 |
| SNX7      | 1p21.3       | -0.00712 | 0.88967  | 0.926740831 |
| RPL3      | 22q13.1      | -0.00712 | 0.889675 | 0.926740831 |
| SNORA69   | Xq24         | 0.007106 | 0.889893 | 0.926920207 |
| FAM193B   | 5q35.3       | -0.0071  | 0.889986 | 0.926968925 |
| ENG       | 9q34.11      | 0.007083 | 0.890258 | 0.927203783 |
| CCDC17    | 1p34.1       | -0.00708 | 0.890341 | 0.927241859 |
| ACTL8     | 1p36.13      | -0.00706 | 0.89056  | 0.927421447 |
| KDR       | 4q12         | -0.00703 | 0.891004 | 0.927822074 |
| PARP15    | 3q21.1       | -0.00703 | 0.891037 | 0.927822074 |
| ITIH5     | 10p14        | -0.007   | 0.891495 | 0.928250182 |
| TMEM134   | 11q13.2      | -0.00699 | 0.891657 | 0.928371062 |
| MICAL2    | 11p15.3      | -0.00699 | 0.89171  | 0.928378027 |
| FAM215A   | 17q21.31     | -0.00697 | 0.89199  | 0.928621208 |
| TMEM120B  | 12q24.31     | 0.006962 | 0.892111 | 0.928657769 |
| ARID4B    | 1q42.3       | -0.00696 | 0.892118 | 0.928657769 |
| GIPC2     | 1p31.1       | 0.006954 | 0.892241 | 0.928737198 |
| ACBD4     | 17q21.31     | 0.006947 | 0.89234  | 0.928792464 |
| OR7E24    | 19p13.2      | 0.006933 | 0.892566 | 0.928979787 |
| ERCC5     | 13q33.1      | -0.00691 | 0.892887 | 0.929265342 |
| ATP5MC1   | 17q21.32     | 0.006908 | 0.892954 | 0.929286073 |
| RC3H2     | 9q33.2       | -0.0069  | 0.893109 | 0.929358587 |
| LYPLA2    | 1p36.11      | -0.0069  | 0.893116 | 0.929358587 |
| DCAF1     | 3p21.2       | 0.006891 | 0.893209 | 0.929406917 |
| RPS6KC1   | 1q32.3       | -0.00688 | 0.893415 | 0.929572561 |
| KCNV1     | 8q23.2       | 0.006862 | 0.893649 | 0.929768541 |
| AURKC     | 19q13.43     | -0.00685 | 0.893917 | 0.929999134 |
| UBXN2B    | 8q12.1       | 0.006819 | 0.894317 | 0.930346241 |
| NOBOX     | 7q35         | 0.006817 | 0.894344 | 0.930346241 |
| ERAP2     | 5q15         | -0.00681 | 0.894423 | 0.930379934 |

|           |              |          |          |             |
|-----------|--------------|----------|----------|-------------|
| EIF4ENIF1 | 22q12.2      | -0.0068  | 0.894579 | 0.930466142 |
| R3HDM4    | 19p13.3      | 0.006801 | 0.894599 | 0.930466142 |
| IL24      | 1q32.1       | 0.006796 | 0.894681 | 0.930503366 |
| ACSM5     | 16p12.3      | -0.00677 | 0.89512  | 0.930912289 |
| MBNL1-AS1 | 3q25.1       | 0.006736 | 0.895597 | 0.931359562 |
| PRDX2     | 19p13.13     | -0.0067  | 0.896091 | 0.931825248 |
| USP19     | 3p21.31      | 0.006693 | 0.896264 | 0.931932029 |
| FIP1L1    | 4q12         | 0.006691 | 0.896287 | 0.931932029 |
| OR52I1    | 11p15.4      | 0.006687 | 0.896353 | 0.93195255  |
| OR5M11    | 11q12.1      | -0.00668 | 0.896437 | 0.931966766 |
| C12ORF40  | 12q12        | 0.00668  | 0.89646  | 0.931966766 |
| TUBB7P    | 4q35.2       | 0.006672 | 0.896583 | 0.932022999 |
| KDM5A     | 12p13.33     | 0.006671 | 0.896607 | 0.932022999 |
| BASP1-AS1 | 5p15.1       | 0.006662 | 0.896738 | 0.932110878 |
| CLEC5A    | 7q34         | 0.006642 | 0.89704  | 0.932307153 |
| BAG6      | 6p21.33      | 0.006642 | 0.897044 | 0.932307153 |
| LOC143666 | 11p15.5      | 0.006641 | 0.897067 | 0.932307153 |
| C5ORF64   | 5q12.1       | 0.006634 | 0.897165 | 0.932344898 |
| CREBRF    | 5q35.1       | -0.00663 | 0.897196 | 0.932344898 |
| MOCS2     | 5q11.2       | -0.00661 | 0.897614 | 0.932731014 |
| OR1K1     | 9q33.2       | 0.006599 | 0.897712 | 0.932783918 |
| TERB2     | 15q21.1      | 0.006591 | 0.897838 | 0.932866898 |
| ULBP3     | 6q25.1       | -0.00658 | 0.897933 | 0.932916859 |
| MVK       | 12q24.11     | 0.00657  | 0.898152 | 0.933096031 |
| LOC407835 | 7q32.1       | 0.006566 | 0.898212 | 0.933109691 |
| KRTAP8-1  | 21q22.11     | -0.00655 | 0.898465 | 0.933285118 |
| PSMD2     | 3q27.1       | 0.006549 | 0.898484 | 0.933285118 |
| SNX13     | 7p21.1       | -0.00655 | 0.898521 | 0.933285118 |
| FAM167B   | 1p35.2       | 0.006534 | 0.898716 | 0.933440108 |
| EIF4EBP1  | 8p11.23      | 0.006515 | 0.899008 | 0.933678686 |
| OR5K1     | 3q11.2       | 0.006513 | 0.899039 | 0.933678686 |
| GJD3      | 17q21.2      | -0.00651 | 0.899138 | 0.933683641 |
| KPNB1     | 17q21.32     | -0.00651 | 0.899145 | 0.933683641 |
| ZBED2     | 3q13.13      | -0.0065  | 0.899184 | 0.933683641 |
| KMO       | 1q43         | -0.00648 | 0.899528 | 0.933983658 |
| ZNF18     | 17p12        | 0.006479 | 0.899566 | 0.933983658 |
| LOXHD1    | 18q21.1      | 0.006468 | 0.899735 | 0.934055192 |
| ADAM20    | 14q24.2      | -0.00647 | 0.899744 | 0.934055192 |
| CHD5      | 1p36.31      | -0.00646 | 0.899804 | 0.934055192 |
| KMT2E     | 7q22.3       | 0.006462 | 0.899825 | 0.934055192 |
| STAT1     | 2q32.2       | 0.006459 | 0.899868 | 0.934055192 |
| HCFC1     | Xq28         | 0.006456 | 0.899921 | 0.934061916 |
| BZW1      | 2q33.1       | -0.00644 | 0.900177 | 0.934244981 |
| CD300E    | 17q25.1      | -0.00644 | 0.900191 | 0.934244981 |
| ZNF136    | 19p13.2      | 0.006417 | 0.900522 | 0.934474806 |
| SCARNA4   | 1q22         | -0.00642 | 0.900545 | 0.934474806 |
| CYP4A11   | 1p33         | -0.00641 | 0.900552 | 0.934474806 |
| C3        | 19p13.3      | -0.00639 | 0.900864 | 0.934749926 |
| DHRS3     | 1p36.21      | 0.006381 | 0.901067 | 0.934911651 |
| RPF1      | 1p22.3       | -0.00638 | 0.901127 | 0.934925227 |
| RAB2A     | 8q12.1-q12.2 | 0.006372 | 0.901206 | 0.934959473 |
| PMS2P9    | 7q11.23      | 0.00636  | 0.901395 | 0.935107278 |
| SEC14L1P1 | 11p11.2      | -0.00635 | 0.901593 | 0.935263911 |
| RAB40B    | 17q25.3      | -0.00631 | 0.902119 | 0.935761461 |
| CDC40     | 6q21         | 0.006307 | 0.902219 | 0.935816337 |
| APLNR     | 11q12.1      | -0.0063  | 0.902382 | 0.935936656 |
| MAFB      | 20q12        | 0.006286 | 0.902531 | 0.935983535 |
| RABGGTB   | 1p31.1       | -0.00628 | 0.902574 | 0.935983535 |

|              |                 |          |          |             |
|--------------|-----------------|----------|----------|-------------|
| CNTF         | 11q12.1         | 0.006275 | 0.902707 | 0.935983535 |
| OR2M5        | 1q44            | -0.00627 | 0.902754 | 0.935983535 |
| OR511        | 11q12.1         | -0.00627 | 0.902754 | 0.935983535 |
| OR8B12       | 11q24.2         | -0.00627 | 0.902754 | 0.935983535 |
| OR4C16       | 11q11           | -0.00627 | 0.902754 | 0.935983535 |
| GNPDA2       | 4p12            | 0.006259 | 0.90296  | 0.936148189 |
| MBIP         | 14q13.3         | 0.00625  | 0.903096 | 0.936240907 |
| ZC3H4        | 19q13.32        | -0.00624 | 0.903212 | 0.936312958 |
| SNORA54      | 11p15.4         | 0.006236 | 0.903308 | 0.936322082 |
| RBM23        | 14q11.2         | 0.006234 | 0.903332 | 0.936322082 |
| LMBRD1       | 6q13            | -0.00623 | 0.903375 | 0.936322082 |
| SYCN         | 19q13.2         | 0.00623  | 0.903408 | 0.936322082 |
| TBC1D3C      | 17q12           | 0.006204 | 0.9038   | 0.936679909 |
| IGLL3P       | 22q11.23        | -0.00618 | 0.904143 | 0.93698712  |
| C7ORF71      | 7p15.2          | 0.006176 | 0.904233 | 0.937031239 |
| VT11B        | 14q24.1         | 0.006168 | 0.904355 | 0.937109495 |
| LOC100130238 | 12q24.33        | -0.00615 | 0.904572 | 0.937285843 |
| PRSS3P2      | 7q34            | 0.00615  | 0.904633 | 0.937301051 |
| UBE2F        | 2q37.3          | -0.00614 | 0.904724 | 0.937346121 |
| HEG1         | 3q21.2          | 0.006128 | 0.904979 | 0.937562666 |
| LUZP2        | 11p14.3         | 0.006124 | 0.905041 | 0.937578333 |
| ZC2HC1B      | 6q24.2          | -0.00612 | 0.905126 | 0.937617864 |
| SFTPC        | 8p21.3          | 0.006114 | 0.905188 | 0.937633358 |
| MBD6         | 12q13.3         | -0.0061  | 0.905345 | 0.937700497 |
| ADCY8        | 8q24.22         | -0.0061  | 0.905347 | 0.937700497 |
| RP1          | 8q11.23-q12.1   | 0.006097 | 0.905448 | 0.937753192 |
| TNFRSF10C    | 8p21.3          | 0.006095 | 0.905491 | 0.937753192 |
| NADSYN1      | 11q13.4         | -0.00609 | 0.905574 | 0.937790725 |
| BEX3         | Xq22.2          | -0.00607 | 0.905817 | 0.937993417 |
| COX16        | 14q24.2         | -0.00606 | 0.906099 | 0.938237387 |
| MYOZ2        | 4q26            | -0.00603 | 0.906484 | 0.93858727  |
| CASC2        | 10q26.11        | 0.006022 | 0.906604 | 0.938620814 |
| MIR7-3HG     | 19p13.3         | 0.006022 | 0.90661  | 0.938620814 |
| EML6         | 2p16.1          | 0.005998 | 0.90698  | 0.938895864 |
| BTG2         | 1q32.1          | 0.005998 | 0.906983 | 0.938895864 |
| PPP4R1L      | 20q13.32        | -0.006   | 0.907016 | 0.938895864 |
| LTBR         | 12p13.31        | 0.005984 | 0.907203 | 0.93901153  |
| PPP4R4       | 14q32.12-q32.13 | 0.005982 | 0.907222 | 0.93901153  |
| NDUFA7       | 19p13.2         | -0.00595 | 0.907658 | 0.939414198 |
| ODF2         | 9q34.11         | -0.00594 | 0.907927 | 0.93962325  |
| MFSD5        | 12q13.13        | 0.005935 | 0.907954 | 0.93962325  |
| SLITRK1      | 13q31.1         | 0.005927 | 0.908073 | 0.939697778 |
| SLC25A1      | 22q11.21        | 0.0059   | 0.908489 | 0.940079931 |
| GLT6D1       | 9q34.3          | -0.00589 | 0.908628 | 0.940175492 |
| C8A          | 1p32.2          | -0.00589 | 0.908724 | 0.940225841 |
| LOC100190986 | 16p12.2         | -0.00587 | 0.908924 | 0.940384787 |
| CRB2         | 9q33.3          | -0.00586 | 0.909087 | 0.940504735 |
| NKX2-6       | 8p21.2          | 0.005855 | 0.909185 | 0.940555018 |
| KRTAP10-8    | 21q22.3         | -0.00585 | 0.909261 | 0.940555018 |
| MDFIC        | 7q31.1-q31.2    | 0.005849 | 0.909277 | 0.940555018 |
| MTHFD2       | 2p13.1          | 0.005824 | 0.909676 | 0.940919099 |
| BAZ2B        | 2q24.2          | -0.00581 | 0.909925 | 0.941128416 |
| NR3C1        | 5q31.3          | 0.005798 | 0.910068 | 0.941227679 |
| ANKRD11      | 16q24.3         | -0.00578 | 0.910337 | 0.941457605 |
| AZU1         | 19p13.3         | 0.00577  | 0.910496 | 0.941573276 |
| PARPBP       | 12q23.2         | -0.00576 | 0.91061  | 0.941642332 |
| TCAF1        | 7q35            | 0.005754 | 0.91075  | 0.941738125 |
| LINC02396    | 12q13.12        | 0.005729 | 0.911128 | 0.942072592 |

|           |            |          |          |             |
|-----------|------------|----------|----------|-------------|
| SMPD1     | 11p15.4    | 0.005723 | 0.911225 | 0.942072592 |
| GDPD1     | 17q22      | 0.005722 | 0.911237 | 0.942072592 |
| METAP1    | 4q23       | 0.005721 | 0.911265 | 0.942072592 |
| FAM72A    | 1q32.1     | -0.00572 | 0.911308 | 0.942072592 |
| DVL1      | 1p36.33    | 0.005702 | 0.911548 | 0.942271476 |
| ANXA7     | 10q22.2    | 0.005699 | 0.911598 | 0.942274406 |
| FAM157B   | 9q34.3     | -0.0057  | 0.911649 | 0.942278748 |
| CDK17     | 12q23.1    | 0.005677 | 0.91194  | 0.942531188 |
| ZNF611    | 19q13.41   | -0.00567 | 0.91211  | 0.942657847 |
| C1ORF146  | 1p22.1     | 0.005655 | 0.912271 | 0.94277622  |
| PLA2G7    | 6p12.3     | 0.00565  | 0.912353 | 0.942789465 |
| SLC7A13   | 8q21.3     | 0.005647 | 0.912404 | 0.942789465 |
| HIGD1C    | 12q13.12   | 0.005646 | 0.912425 | 0.942789465 |
| LINC00643 | 14q23.2    | -0.00562 | 0.912764 | 0.943045381 |
| HIST1H3B  | 6p22.2     | -0.00562 | 0.912834 | 0.943045381 |
| SNORA80A  | 21q22.11   | -0.00562 | 0.912856 | 0.943045381 |
| ARHGAP28  | 18p11.31   | 0.005617 | 0.912862 | 0.943045381 |
| PNKP      | 19q13.33   | 0.005588 | 0.913321 | 0.943422261 |
| INTS7     | 1q32.3     | 0.005588 | 0.913321 | 0.943422261 |
| FNBP1L    | 1p22.1     | 0.005576 | 0.9135   | 0.943559143 |
| ATP4B     | 13q34      | 0.005568 | 0.913625 | 0.943595814 |
| GATB      | 4q31.3     | -0.00557 | 0.91363  | 0.943595814 |
| NXNL2     | 9q22.1     | 0.005562 | 0.91372  | 0.943640649 |
| LINC00470 | 18p11.32   | -0.00556 | 0.913778 | 0.943651458 |
| DDX41     | 5q35.3     | -0.00554 | 0.914066 | 0.943870766 |
| CP        | 3q24-q25.1 | -0.00554 | 0.914085 | 0.943870766 |
| MCM4      | 8q11.21    | 0.005513 | 0.914475 | 0.944225054 |
| STH       | 17q21.31   | 0.005501 | 0.914661 | 0.944364708 |
| ZNF148    | 3q21.2     | -0.0055  | 0.914704 | 0.944364708 |
| CCL3      | 17q12      | -0.00549 | 0.914774 | 0.944388157 |
| LOC728554 | 5q35.3     | 0.005485 | 0.914907 | 0.944445609 |
| SERPINA11 | 14q32.13   | -0.00548 | 0.914965 | 0.944445609 |
| LELP1     | 1q21.3     | -0.00548 | 0.914971 | 0.944445609 |
| SNAR-E    | 19q13.32   | 0.005473 | 0.915088 | 0.944517398 |
| EFNA3     | 1q21.3     | 0.005453 | 0.915397 | 0.944786975 |
| CSH2      | 17q23.3    | -0.00545 | 0.915492 | 0.944836393 |
| MEOX1     | 17q21.31   | -0.00544 | 0.915636 | 0.944908756 |
| ZNF132    | 19q13.43   | 0.005436 | 0.915656 | 0.944908756 |
| OR6N1     | 1q23.1     | -0.00542 | 0.91594  | 0.945153057 |
| LOC388955 | 2p15       | 0.00539  | 0.916381 | 0.94555991  |
| ST8SIA5   | 18q21.1    | 0.005382 | 0.916493 | 0.945626029 |
| FAM166A   | 9q34.3     | -0.00536 | 0.916856 | 0.94595224  |
| LCE3D     | 1q21.3     | 0.005351 | 0.916981 | 0.945964991 |
| NBPF4     | 1p13.3     | -0.00535 | 0.917053 | 0.945964991 |
| CHAC1     | 15q15.1    | -0.00534 | 0.91707  | 0.945964991 |
| KIF2B     | 17q22      | 0.005343 | 0.917105 | 0.945964991 |
| OR6Q1     | 11q12.1    | 0.005343 | 0.917105 | 0.945964991 |
| RABIF     | 1q32.1     | 0.005328 | 0.917337 | 0.946155467 |
| HELT      | 4q35.1     | 0.005321 | 0.917438 | 0.946211437 |
| GPR63     | 6q16.1     | -0.00529 | 0.917849 | 0.94658663  |
| HIST2H3C  | 1q21.2     | -0.00529 | 0.91793  | 0.946619915 |
| GNPTG     | 16p13.3    | 0.005281 | 0.918062 | 0.946619915 |
| RAD18     | 3p25.3     | 0.00528  | 0.918069 | 0.946619915 |
| LINC01881 | 2q37.3     | -0.00528 | 0.918071 | 0.946619915 |
| C16ORF71  | 16p13.3    | 0.005271 | 0.918207 | 0.946711874 |
| ADAT3     | 19p13.3    | 0.005263 | 0.918345 | 0.946765049 |
| GADD45A   | 1p31.3     | -0.00526 | 0.918392 | 0.946765049 |
| ATP6V0E1  | 5q35.1     | 0.005254 | 0.918478 | 0.946765049 |

|            |                |          |          |             |
|------------|----------------|----------|----------|-------------|
| SLC35G3    | 17q12          | 0.005253 | 0.918488 | 0.946765049 |
| PCDHB9     | 5q31.3         | 0.005253 | 0.918495 | 0.946765049 |
| SCP2D1     | 20p11.23       | 0.005248 | 0.918563 | 0.946786085 |
| PKMYT1     | 16p13.3        | 0.005219 | 0.919024 | 0.947213116 |
| TMEM150B   | 19q13.42       | 0.005196 | 0.919367 | 0.947517758 |
| BARHL1     | 9q34.13        | -0.00519 | 0.919512 | 0.947618394 |
| BAALC-AS2  | 8q22.3         | -0.00518 | 0.919689 | 0.947748308 |
| POLR2L     | 11p15.5        | -0.00517 | 0.919773 | 0.947748308 |
| SNORA80E   | 1q22           | -0.00517 | 0.91978  | 0.947748308 |
| CASP6      | 4q25           | -0.00516 | 0.919966 | 0.94785985  |
| SLC22A5    | 5q31.1         | 0.005157 | 0.919983 | 0.94785985  |
| ZC3H7B     | 22q13.2        | 0.005149 | 0.920103 | 0.947934438 |
| PZP        | 12p13.31       | 0.005146 | 0.92015  | 0.947934438 |
| FAM205A    | 9p13.3         | 0.005124 | 0.92048  | 0.948206718 |
| KCTD21     | 11q14.1        | 0.005123 | 0.920509 | 0.948206718 |
| SAFB2      | 19p13.3        | -0.00511 | 0.920666 | 0.948297047 |
| NELFB      | 9q34.3         | -0.00511 | 0.920706 | 0.948297047 |
| ZNF516     | 18q23          | -0.00511 | 0.920739 | 0.948297047 |
| TARM1      | 19q13.42       | 0.005101 | 0.920839 | 0.948330584 |
| DPPA3      | 12p13.31       | -0.0051  | 0.920866 | 0.948330584 |
| RAD54L     | 1p34.1         | -0.00507 | 0.921395 | 0.948826262 |
| SOST       | 17q21.31       | 0.005045 | 0.921711 | 0.949102842 |
| FEZF2      | 3p14.2         | 0.00503  | 0.921938 | 0.949288391 |
| ANKHD1     | 5q31.3         | -0.00501 | 0.922297 | 0.949609105 |
| PREX2      | 8q13.2         | 0.005003 | 0.922354 | 0.949618336 |
| GPR158     | 10p12.1        | 0.004986 | 0.922617 | 0.949840537 |
| AOC2       | 17q21.31       | 0.004968 | 0.922897 | 0.950079793 |
| CHRM5      | 15q14          | 0.004954 | 0.923117 | 0.950257585 |
| RAB3GAP1   | 2q21.3         | 0.004946 | 0.923243 | 0.950338682 |
| ADCY4      | 14q12          | -0.00493 | 0.923456 | 0.950509241 |
| ATP1A1     | 1p13.1         | -0.00493 | 0.92354  | 0.950546105 |
| AKAP14     | Xq24           | 0.004912 | 0.923773 | 0.9507374   |
| PNN        | 14q21.1        | 0.004898 | 0.923989 | 0.950906012 |
| DAZAP1     | 19p13.3        | -0.00489 | 0.924076 | 0.950906012 |
| HIST2H2AA3 | 1q21.2         | -0.00489 | 0.924079 | 0.950906012 |
| OR4K1      | 14q11.2        | 0.004878 | 0.92429  | 0.951025671 |
| KRTAP19-3  | 21q22.11       | -0.00488 | 0.92429  | 0.951025671 |
| KRTAP13-2  | 21q22.11       | -0.00487 | 0.92441  | 0.951099762 |
| PCDHGC4    | 5q31.3         | 0.004861 | 0.924559 | 0.951162109 |
| SDHAP1     | 3q29           | -0.00486 | 0.924565 | 0.951162109 |
| C12ORF65   | 12q24.31       | 0.004841 | 0.924865 | 0.951421674 |
| DNAJB4     | 1p31.1         | -0.00484 | 0.924919 | 0.951427634 |
| LARP7      | 4q25           | -0.00483 | 0.925078 | 0.951543248 |
| FABP9      | 8q21.13        | -0.0048  | 0.925465 | 0.951891734 |
| SNORA28    | 14q32.32       | 0.004797 | 0.925543 | 0.951922982 |
| GALNT2     | 1q42.13        | 0.004777 | 0.925851 | 0.95218547  |
| ODF3L1     | 15q24.2        | 0.004775 | 0.925893 | 0.95218547  |
| SRSF4      | 1p35.3         | 0.004733 | 0.926531 | 0.952746584 |
| TRPC2      | 11p15.4        | 0.004733 | 0.926534 | 0.952746584 |
| PRG1       | 19q13.31       | -0.00473 | 0.926617 | 0.952772749 |
| AMD1       | 6q21           | -0.00473 | 0.926654 | 0.952772749 |
| LYZL1      | 10p12.1-p11.23 | -0.00472 | 0.926746 | 0.952818352 |
| RBM34      | 1q42.3         | -0.00467 | 0.927561 | 0.953606735 |
| LBX2-AS1   | 2p13.1         | 0.004641 | 0.927954 | 0.953900785 |
| AWAT2      | Xq13.1         | 0.004641 | 0.927958 | 0.953900785 |
| EN1        | 2q14.2         | -0.00464 | 0.928029 | 0.953900785 |
| ANLN       | 7p14.2         | 0.004636 | 0.928037 | 0.953900785 |
| FAIM       | 3q22.3         | 0.004624 | 0.928231 | 0.954050495 |

|           |              |          |          |             |
|-----------|--------------|----------|----------|-------------|
| TENM3-AS1 | 4q34.3       | -0.00461 | 0.928374 | 0.95408866  |
| DLG2      | 11q14.1      | -0.00461 | 0.92842  | 0.95408866  |
| FOXN4     | 12q24.11     | 0.004611 | 0.928425 | 0.95408866  |
| COLEC10   | 8q24.12      | -0.00461 | 0.928458 | 0.95408866  |
| SLC27A6   | 5q23.3       | 0.004586 | 0.928818 | 0.954376619 |
| DNMBP     | 10q24.2      | 0.004585 | 0.928834 | 0.954376619 |
| ZFX       | Xp22.11      | -0.00458 | 0.92889  | 0.954378    |
| PKD1L1    | 7p12.3       | 0.004578 | 0.92893  | 0.954378    |
| TRARG1    | 17p13.3      | 0.004548 | 0.929405 | 0.95481655  |
| ADAMTS20  | 12q12        | 0.004542 | 0.929497 | 0.954830301 |
| FKBP11    | 12q13.12     | -0.00454 | 0.929514 | 0.954830301 |
| ZBED4     | 22q13.33     | 0.004513 | 0.929947 | 0.955196524 |
| TRIM51    | 11q12.1      | -0.00451 | 0.929966 | 0.955196524 |
| LCN1      | 9q34.3       | 0.004503 | 0.930102 | 0.95528796  |
| ASCL3     | 11p15.4      | 0.004498 | 0.930171 | 0.955309301 |
| SRPK2     | 7q22.3       | -0.00448 | 0.930447 | 0.955543975 |
| MGC27382  | 1p31.1       | -0.00446 | 0.930791 | 0.955847932 |
| P4HA1     | 10q22.1      | 0.004453 | 0.930867 | 0.955854025 |
| TMED3     | 15q25.1      | -0.00445 | 0.930894 | 0.955854025 |
| NR2E1     | 6q21         | -0.00445 | 0.930961 | 0.955854025 |
| USP17L6P  | 4p16.1       | 0.004446 | 0.930988 | 0.955854025 |
| CACNG8    | 19q13.42     | 0.004437 | 0.931114 | 0.955934966 |
| TAS2R16   | 7q31.32 7q31 | 0.004414 | 0.931482 | 0.956214793 |
| OR4K17    | 14q11.2      | 0.004414 | 0.931482 | 0.956214793 |
| GTF3C6    | 6q21         | 0.004402 | 0.931667 | 0.956355633 |
| RUNX3     | 1p36.11      | 0.004392 | 0.931814 | 0.956442388 |
| NRP1      | 10p11.22     | 0.00439  | 0.931847 | 0.956442388 |
| SLC35D2   | 9q22.32      | -0.00438 | 0.932074 | 0.956623818 |
| DNASE1L2  | 16p13.3      | -0.00437 | 0.932141 | 0.956623818 |
| EARS2     | 16p12.2      | -0.00437 | 0.932167 | 0.956623818 |
| SERPINI2  | 3q26.1       | 0.004355 | 0.932393 | 0.956806413 |
| DHRS4L1   | 14q11.2      | 0.004344 | 0.932559 | 0.956883889 |
| APLN      | Xq26.1       | -0.00434 | 0.932564 | 0.956883889 |
| DMC1      | 22q13.1      | 0.00434  | 0.932627 | 0.956899853 |
| SNTB2     | 16q22.1      | -0.00431 | 0.933094 | 0.95732977  |
| SNORA62   | 3p22.1       | 0.004304 | 0.933173 | 0.957361375 |
| PAQR4     | 16p13.3      | 0.0043   | 0.933248 | 0.957389044 |
| BMS1P2    | 10q11.22     | -0.00428 | 0.933594 | 0.957655722 |
| ITPR1     | 3p26.1       | -0.00428 | 0.933611 | 0.957655722 |
| FKBP8     | 19p13.11     | -0.00427 | 0.933694 | 0.957655722 |
| LINC00710 | 10p14        | -0.00427 | 0.933742 | 0.957655722 |
| CCR3      | 3p21.31      | 0.004266 | 0.933762 | 0.957655722 |
| MSS51     | 10q22.2      | -0.00426 | 0.933794 | 0.957655722 |
| PLEKHM3   | 2q33.3       | 0.00426  | 0.933858 | 0.957671659 |
| CYP27B1   | 12q14.1      | 0.004256 | 0.933921 | 0.957687594 |
| SNORA24   | 4q26         | 0.004241 | 0.934152 | 0.957841875 |
| FRG2      | 4q35.2       | -0.00424 | 0.934183 | 0.957841875 |
| OR5J2     | 11q12.1      | -0.00423 | 0.934249 | 0.957841875 |
| CELA2A    | 1p36.21      | -0.00423 | 0.934263 | 0.957841875 |
| RAB4B     | 19q13.2      | 0.004225 | 0.934408 | 0.957909802 |
| TPRX1     | 19q13.33     | -0.00422 | 0.934425 | 0.957909802 |
| TCTN3     | 10q24.1      | 0.004218 | 0.934515 | 0.957952937 |
| MAP3K14   | 17q21.31     | 0.004213 | 0.934588 | 0.957979111 |
| MID2      | Xq22.3       | 0.004201 | 0.934772 | 0.958118084 |
| PAK2      | 3q29         | 0.004193 | 0.934898 | 0.958170411 |
| CDH5      | 16q21        | 0.004192 | 0.934918 | 0.958170411 |
| FKSG29    | 13q32.3      | -0.00418 | 0.935121 | 0.958253207 |
| RASAL2    | 1q25.2       | -0.00418 | 0.935148 | 0.958253207 |

|             |              |          |          |             |
|-------------|--------------|----------|----------|-------------|
| MCMBP       | 10q26.11     | -0.00418 | 0.935165 | 0.958253207 |
| TREML3P     | 6p21.1       | -0.00417 | 0.93519  | 0.958253207 |
| PCBP2       | 12q13.13     | 0.004153 | 0.935515 | 0.958536982 |
| CCDC146     | 7q11.23      | -0.00415 | 0.935629 | 0.958604127 |
| ZBTB41      | 1q31.3       | 0.004134 | 0.935819 | 0.958749859 |
| TASOR2      | 10p15.1      | 0.00412  | 0.936026 | 0.958848736 |
| XPC         | 3p25.1       | 0.004119 | 0.936042 | 0.958848736 |
| PALMD       | 1p21.2       | -0.00412 | 0.936059 | 0.958848736 |
| LACC1       | 13q14.11     | -0.0041  | 0.936406 | 0.959155011 |
| CLCF1       | 11q13.2      | -0.00407 | 0.936859 | 0.959570594 |
| IL2         | 4q27         | 0.004051 | 0.937092 | 0.959760085 |
| WNT8B       | 10q24.31     | -0.00405 | 0.937157 | 0.959776783 |
| SNORA16B    | 1q32.3       | -0.00404 | 0.937212 | 0.959784532 |
| SPANXN2     | Xq27.3       | 0.004018 | 0.937611 | 0.960144196 |
| LEPR        | 1p31.3       | 0.004012 | 0.937707 | 0.960192894 |
| TBC1D3B     | 17q12        | -0.00401 | 0.937763 | 0.96020187  |
| F11         | 4q35.2       | 0.003984 | 0.938138 | 0.960536471 |
| UBXN11      | 1p36.11      | 0.003977 | 0.938244 | 0.960595529 |
| GRPEL2      | 5q32         | -0.00394 | 0.938884 | 0.961182851 |
| TSPAN32     | 11p15.5      | -0.00393 | 0.938913 | 0.961182851 |
| RTN3        | 11q13.1      | 0.003915 | 0.939201 | 0.961428401 |
| OR5E1P      | 11p15.4      | 0.003908 | 0.939317 | 0.961497694 |
| HMGXB4      | 22q12.3      | 0.003901 | 0.939422 | 0.96155552  |
| PARP4       | 13q12.12     | -0.00389 | 0.939598 | 0.961687372 |
| PITHD1      | 1p36.11      | 0.003885 | 0.939668 | 0.961709937 |
| ADPRHL2     | 1p34.3       | 0.003875 | 0.939825 | 0.961821283 |
| BMS1P4      | 10q22.2      | -0.00387 | 0.939922 | 0.961871158 |
| RBP4        | 10q23.33     | -0.00385 | 0.940156 | 0.962046009 |
| UAP1L1      | 9q34.3       | -0.00385 | 0.940189 | 0.962046009 |
| MLANA       | 9p24.1       | 0.003847 | 0.940267 | 0.962076298 |
| OBSCN       | 1q42.13      | -0.00384 | 0.940359 | 0.962121824 |
| MANCR       | 10p15.1      | -0.00383 | 0.940451 | 0.962166576 |
| OR10G9      | 11q24.2      | -0.00383 | 0.940564 | 0.962232683 |
| CRP         | 1q23.2       | 0.00382  | 0.940682 | 0.962293606 |
| ROS1        | 6q22.1       | 0.003817 | 0.940719 | 0.962293606 |
| HCCS        | Xp22.2       | -0.00381 | 0.9408   | 0.96232165  |
| OR5P3       | 11p15.4      | 0.003809 | 0.940843 | 0.96232165  |
| KDM8        | 16p12.1      | -0.0038  | 0.941003 | 0.962436562 |
| LINC00632   | Xq27.1       | -0.00378 | 0.941256 | 0.962646035 |
| DHFR2       | 3q11.2       | 0.003772 | 0.941417 | 0.962736177 |
| ACIN1       | 14q11.2      | -0.00377 | 0.94144  | 0.962736177 |
| PEX6        | 6p21.1       | 0.00376  | 0.941614 | 0.962864469 |
| TRMT1L      | 1q25.3       | 0.003753 | 0.941721 | 0.962924503 |
| BTN2A3P     | 6p22.2       | 0.003748 | 0.941794 | 0.96295041  |
| MZF1        | 19q13.43     | 0.003732 | 0.942038 | 0.963150331 |
| TMEM132D    | 12q24.33     | -0.00372 | 0.94221  | 0.963276975 |
| PRKCE       | 2p21         | -0.00372 | 0.942305 | 0.963324944 |
| LOC145474   | 14q24.2      | -0.00371 | 0.942438 | 0.96341254  |
| PHACTR2-AS1 | 6q24.2       | -0.00369 | 0.942668 | 0.963597582 |
| SIGLEC15    | 18q12.3      | 0.003683 | 0.942798 | 0.963663849 |
| C1GALT1     | 7p22.1-p21.3 | 0.003681 | 0.942829 | 0.963663849 |
| HNRNPA1P33  | 10q11.22     | 0.003646 | 0.943369 | 0.964167287 |
| UNC45A      | 15q26.1      | -0.00364 | 0.943526 | 0.964278408 |
| PCSK1       | 5q15         | -0.00363 | 0.9436   | 0.964304183 |
| MND1        | 4q31.3       | -0.00361 | 0.94389  | 0.964507687 |
| MBLAC1      | 7q22.1       | 0.003613 | 0.943895 | 0.964507687 |
| PRR11       | 17q22        | 0.0036   | 0.944087 | 0.964654591 |
| LINC01973   | 17q25.3      | -0.00358 | 0.944412 | 0.964937583 |

|           |          |          |          |             |
|-----------|----------|----------|----------|-------------|
| YARS      | 1p35.1   | 0.003557 | 0.944751 | 0.965234835 |
| QARS      | 3p21.31  | -0.00355 | 0.944898 | 0.965275101 |
| GTSE1-DT  | 22q13.31 | -0.00355 | 0.9449   | 0.965275101 |
| KRT12     | 17q21.2  | 0.003543 | 0.94498  | 0.965275101 |
| TDRD12    | 19q13.11 | 0.003541 | 0.945001 | 0.965275101 |
| PSMA6     | 14q13.2  | 0.003539 | 0.945032 | 0.965275101 |
| RBMXL1    | 1p22.2   | 0.003521 | 0.945322 | 0.965484282 |
| SUMO1P1   | 20q13.2  | -0.00352 | 0.945335 | 0.965484282 |
| IL31RA    | 5q11.2   | -0.00352 | 0.945381 | 0.965484282 |
| PHLDB1    | 11q23.3  | 0.003502 | 0.945616 | 0.965674809 |
| F2R       | 5q13.3   | -0.00349 | 0.945763 | 0.965775567 |
| ACTL9     | 19p13.2  | 0.00348  | 0.945943 | 0.965852822 |
| ACAA2     | 18q21.1  | -0.00348 | 0.945973 | 0.965852822 |
| AIFM2     | 10q22.1  | -0.00348 | 0.945983 | 0.965852822 |
| CCL7      | 17q12    | -0.00346 | 0.946312 | 0.966108814 |
| NTRK2     | 9q21.33  | 0.003455 | 0.94633  | 0.966108814 |
| KRTAP10-3 | 21q22.3  | 0.003449 | 0.946425 | 0.966156544 |
| LHX8      | 1p31.1   | 0.003445 | 0.946487 | 0.966169794 |
| CLK4      | 5q35.3   | 0.003433 | 0.946684 | 0.966281874 |
| CBLN2     | 18q22.3  | -0.00343 | 0.946765 | 0.966281874 |
| HLA-DQB1  | 6p21.32  | 0.003427 | 0.946768 | 0.966281874 |
| DEFB1     | 8p23.1   | 0.003426 | 0.946791 | 0.966281874 |
| CCL8      | 17q12    | -0.00342 | 0.946863 | 0.966281874 |
| SMIM21    | 18q23    | 0.00342  | 0.946886 | 0.966281874 |
| ZNF805    | 19q13.43 | -0.00342 | 0.946938 | 0.96628583  |
| MDN1      | 6q15     | -0.00341 | 0.947092 | 0.96635563  |
| OR2G2     | 1q44     | 0.003406 | 0.947103 | 0.96635563  |
| CX3CL1    | 16q21    | 0.003382 | 0.947469 | 0.966539809 |
| THNSL1    | 10p12.1  | 0.003376 | 0.947556 | 0.966539809 |
| CNOT1     | 16q21    | 0.003376 | 0.947562 | 0.966539809 |
| ZNF700    | 19p13.2  | 0.003376 | 0.947562 | 0.966539809 |
| PPP1CB    | 2p23.2   | -0.00337 | 0.947582 | 0.966539809 |
| FUCA2     | 6q24.2   | -0.00337 | 0.947646 | 0.966539809 |
| GABRB3    | 15q12    | -0.00337 | 0.947649 | 0.966539809 |
| EME2      | 16p13.3  | -0.00337 | 0.947687 | 0.966539809 |
| DECR1     | 8q21.3   | 0.003364 | 0.947743 | 0.966539809 |
| COMMD4    | 15q24.2  | -0.00336 | 0.947766 | 0.966539809 |
| AHSP      | 16p11.2  | 0.003348 | 0.947992 | 0.966721172 |
| TCHP      | 12q24.11 | -0.00334 | 0.94806  | 0.966741005 |
| ALKBH7    | 19p13.3  | 0.003317 | 0.948477 | 0.967053217 |
| CBLIF     | 11q12.1  | -0.00332 | 0.948507 | 0.967053217 |
| STEAP1    | 7q21.13  | -0.00331 | 0.948517 | 0.967053217 |
| SLC22A9   | 11q12.3  | 0.003312 | 0.948562 | 0.967053217 |
| DENND3    | 8q24.3   | -0.00331 | 0.948607 | 0.967053217 |
| RNGTT     | 6q15     | -0.00329 | 0.948821 | 0.967221848 |
| CLYBL     | 13q32.3  | -0.00327 | 0.949158 | 0.96751641  |
| GUSBP3    | 5q13.2   | -0.00325 | 0.949542 | 0.967858597 |
| PATL1     | 11q12.1  | 0.003245 | 0.949599 | 0.967867211 |
| CABP5     | 19q13.33 | -0.00324 | 0.949671 | 0.967891209 |
| RNF2      | 1q25.3   | 0.003228 | 0.949856 | 0.968030766 |
| KREMEN2   | 16p13.3  | 0.003217 | 0.950033 | 0.968161879 |
| IDI2-AS1  | 10p15.3  | 0.003207 | 0.950177 | 0.968258954 |
| COL6A6    | 3q22.1   | 0.003204 | 0.95023  | 0.968264278 |
| TRAPPC1   | 17p13.1  | -0.00317 | 0.950801 | 0.968796771 |
| STX6      | 1q25.3   | -0.00316 | 0.950872 | 0.968818942 |
| MOAP1     | 14q32.12 | -0.00312 | 0.951479 | 0.969388954 |
| RSRC1     | 3q25.32  | -0.00311 | 0.95165  | 0.969513177 |
| TOR1AIP1  | 1q25.2   | -0.0031  | 0.951855 | 0.969673114 |



|            |          |          |          |             |
|------------|----------|----------|----------|-------------|
| AWAT1      | Xq13.1   | 0.003092 | 0.951974 | 0.969722474 |
| CFI        | 4q25     | 0.00309  | 0.952    | 0.969722474 |
| SNORA32    | 11q21    | 0.00307  | 0.952308 | 0.969986348 |
| LINC00839  | 10q11.21 | -0.00307 | 0.952381 | 0.970006553 |
| CETN1      | 18p11.32 | -0.00306 | 0.952459 | 0.970006553 |
| ATF7IP     | 12p13.1  | 0.003059 | 0.952473 | 0.970006553 |
| CASP8AP2   | 6q15     | -0.00305 | 0.952608 | 0.970094993 |
| GTF2IRD1P1 | 7q11.21  | -0.00304 | 0.952736 | 0.970127959 |
| KCNA4      | 11p14.1  | -0.00304 | 0.952745 | 0.970127959 |
| C4ORF46    | 4q32.1   | 0.003035 | 0.952852 | 0.970127959 |
| WWP1       | 8q21.3   | 0.003034 | 0.952862 | 0.970127959 |
| KRT3       | 12q13.13 | 0.003033 | 0.952883 | 0.970127959 |
| POLR3G     | 5q14.3   | -0.00302 | 0.953016 | 0.970213981 |
| ISCA1      | 9q21.33  | -0.00302 | 0.953086 | 0.970236073 |
| HOTAIR     | 12q13.13 | -0.00299 | 0.953492 | 0.970572657 |
| HPX        | 11p15.4  | 0.002992 | 0.953514 | 0.970572657 |
| NUS1       | 6q22.1   | 0.002986 | 0.953621 | 0.970582971 |
| C16ORF82   | 16p12.1  | -0.00299 | 0.953621 | 0.970582971 |
| MCRIP2     | 16p13.3  | 0.002979 | 0.953717 | 0.970632082 |
| ARNT2      | 15q25.1  | 0.002966 | 0.953918 | 0.970786735 |
| B4GALT7    | 5q35.3   | -0.00294 | 0.954359 | 0.971117434 |
| HTR1E      | 6q14.3   | 0.002938 | 0.954361 | 0.971117434 |
| TEKT1      | 17p13.1  | -0.00294 | 0.954388 | 0.971117434 |
| KLF1       | 19p13.13 | -0.00292 | 0.954667 | 0.97131848  |
| SLC35F5    | 2q14.1   | -0.00292 | 0.954683 | 0.97131848  |
| C1ORF189   | 1q21.3   | -0.00291 | 0.954857 | 0.971427115 |
| SGK3       | 8q13.1   | -0.0029  | 0.954887 | 0.971427115 |
| RUFY2      | 10q21.3  | 0.002896 | 0.95501  | 0.97147456  |
| TNFAIP2    | 14q32.32 | -0.00289 | 0.95503  | 0.97147456  |
| CXCL10     | 4q21.1   | 0.00289  | 0.9551   | 0.971496581 |
| PKNOX2     | 11q24.2  | 0.002882 | 0.955232 | 0.971581324 |
| HOXD8      | 2q31.1   | 0.002878 | 0.955294 | 0.971594983 |
| ATP8A2     | 13q12.13 | -0.00287 | 0.955413 | 0.971666552 |
| PSPN       | 19p13.3  | 0.00285  | 0.955724 | 0.971827356 |
| CAVIN4     | 9q31.1   | -0.00285 | 0.955734 | 0.971827356 |
| PACRGL     | 4p15.31  | 0.002846 | 0.955785 | 0.971827356 |
| CSF2       | 5q31.1   | 0.002845 | 0.955796 | 0.971827356 |
| CBWD5      | 9q21.11  | 0.002844 | 0.955814 | 0.971827356 |
| CACNA2D2   | 3p21.31  | -0.00283 | 0.955986 | 0.97195284  |
| TRPC7      | 5q31.1   | 0.002823 | 0.956142 | 0.972062374 |
| TCTEX1D1   | 1p31.3   | -0.00281 | 0.95629  | 0.972163108 |
| MORC1      | 3q13.13  | -0.0028  | 0.956529 | 0.972343527 |
| SNORA14B   | 1q42.3   | 0.002796 | 0.956564 | 0.972343527 |
| FZD1       | 7q21.13  | -0.00279 | 0.956637 | 0.97236842  |
| PNKD       | 2q35     | 0.002769 | 0.956988 | 0.972675649 |
| SULT6B1    | 2p22.2   | 0.00276  | 0.957114 | 0.972745955 |
| LINC00158  | 21q21.2  | -0.00276 | 0.957154 | 0.972745955 |
| SLBP       | 4p16.3   | 0.002748 | 0.957312 | 0.97285695  |
| RAB10      | 2p23.3   | 0.002733 | 0.957543 | 0.973012873 |
| TICRR      | 15q26.1  | 0.002732 | 0.957563 | 0.973012873 |
| FKBP1B     | 2p23.3   | 0.002724 | 0.957686 | 0.973081198 |
| C20ORF173  | 20q11.22 | 0.002721 | 0.957727 | 0.973081198 |
| C5ORF58    | 5q35.1   | 0.002701 | 0.958031 | 0.973340289 |
| TRPM1      | 15q13.3  | -0.00268 | 0.958329 | 0.973593444 |
| ERICH6B    | 13q14.13 | -0.00268 | 0.958425 | 0.973642244 |
| HIVEP2     | 6q24.2   | -0.00266 | 0.958599 | 0.973769011 |
| RNF126P1   | 17q22    | 0.002644 | 0.958921 | 0.974009656 |
| CDT1       | 16q24.3  | 0.002643 | 0.958933 | 0.974009656 |

|           |          |          |          |             |
|-----------|----------|----------|----------|-------------|
| MREG      | 2q35     | 0.002629 | 0.959157 | 0.974187663 |
| PRDM5     | 4q27     | -0.00261 | 0.959429 | 0.97440109  |
| URGCP     | 7p13     | -0.00261 | 0.959464 | 0.97440109  |
| IFI44L    | 1p31.1   | 0.0026   | 0.959598 | 0.974465165 |
| ZNF587    | 19q13.43 | 0.002599 | 0.959625 | 0.974465165 |
| PRAMEF6   | 1p36.21  | -0.00257 | 0.960021 | 0.97481811  |
| SEZ6      | 17q11.2  | -0.00256 | 0.960284 | 0.975002138 |
| OR4F15    | 15q26.3  | -0.00256 | 0.960299 | 0.975002138 |
| CEP128    | 14q31.1  | -0.00255 | 0.960437 | 0.97506783  |
| TBC1D3P2  | 17q23.2  | -0.00254 | 0.9605   | 0.97506783  |
| GTF2H2C   | 5q13.2   | -0.00254 | 0.96051  | 0.97506783  |
| NLGN2     | 17p13.1  | -0.00252 | 0.960794 | 0.975306773 |
| BPTF      | 17q24.2  | -0.00252 | 0.960885 | 0.975348935 |
| SPATA48   | 7p12.2   | -0.00251 | 0.961014 | 0.975431041 |
| WDR6      | 3p21.31  | 0.002495 | 0.961229 | 0.975599462 |
| LINC00661 | 19p13.12 | -0.00249 | 0.961356 | 0.975679295 |
| OR6M1     | 11q24.1  | 0.002481 | 0.961445 | 0.975720159 |
| ZNF554    | 19p13.3  | -0.00247 | 0.961553 | 0.975780146 |
| ATXN1L    | 16q22.2  | -0.00244 | 0.962041 | 0.976206937 |
| FANCI     | 15q26.1  | 0.002441 | 0.962071 | 0.976206937 |
| MYOCD     | 17p12    | -0.00243 | 0.962208 | 0.976296522 |
| ZDHHC20   | 13q12.11 | 0.002422 | 0.962368 | 0.976409837 |
| MANSC1    | 12p13.2  | -0.00241 | 0.962549 | 0.976543489 |
| NKX6-3    | 8p11.21  | 0.002391 | 0.962843 | 0.976792181 |
| PEMT      | 17p11.2  | 0.002388 | 0.962893 | 0.976793803 |
| PDXP      | 22q13.1  | 0.002376 | 0.963082 | 0.976935895 |
| GOLGA8IP  | 15q11.2  | -0.00237 | 0.963166 | 0.976971068 |
| CLEC4E    | 12p13.31 | 0.002354 | 0.963426 | 0.977186072 |
| LPAR2     | 19p13.11 | -0.00235 | 0.963532 | 0.977243447 |
| CCDC151   | 19p13.2  | -0.00234 | 0.963641 | 0.977304709 |
| PGLYRP1   | 19q13.32 | -0.00234 | 0.963705 | 0.977315328 |
| KATNBL1   | 15q14    | -0.00233 | 0.963749 | 0.977315328 |
| OR52N2    | 11p15.4  | 0.002317 | 0.963996 | 0.977475341 |
| NPPA      | 1p36.22  | 0.002317 | 0.964004 | 0.977475341 |
| TAS2R9    | 12p13.2  | 0.002311 | 0.964086 | 0.977508421 |
| MRS2      | 6p22.3   | -0.00225 | 0.965073 | 0.978459529 |
| PHEX      | Xp22.11  | -0.00224 | 0.965185 | 0.978523794 |
| NKX2-3    | 10q24.2  | -0.00223 | 0.965295 | 0.978537997 |
| CPSF6     | 12q15    | -0.00223 | 0.965297 | 0.978537997 |
| PCDHGA11  | 5q31.3   | -0.00223 | 0.96541  | 0.978553641 |
| NASP      | 1p34.1   | 0.002225 | 0.965424 | 0.978553641 |
| C14ORF28  | 14q21.2  | 0.002222 | 0.965467 | 0.978553641 |
| RBPJ      | 4p15.2   | 0.002219 | 0.965524 | 0.978553641 |
| XKR3      | 22q11.1  | 0.002217 | 0.965556 | 0.978553641 |
| APOA5     | 11q23.3  | -0.00221 | 0.965723 | 0.978673346 |
| FOXC1     | 6p25.3   | 0.002199 | 0.965825 | 0.978726652 |
| PSMA4     | 15q25.1  | -0.00219 | 0.966035 | 0.978890547 |
| XAGE1B    | Xp11.22  | -0.00218 | 0.966129 | 0.978936124 |
| PMPCA     | 9q34.3   | -0.00216 | 0.966457 | 0.979218296 |
| CAMK1G    | 1q32.2   | 0.002133 | 0.966852 | 0.979522999 |
| PLSCR2    | 3q24     | 0.002127 | 0.966941 | 0.979522999 |
| SLC6A16   | 19q13.33 | -0.00213 | 0.966948 | 0.979522999 |
| PELI2     | 14q22.3  | 0.002126 | 0.966962 | 0.979522999 |
| LCTL      | 15q22.31 | -0.00212 | 0.967002 | 0.979522999 |
| DPPA5     | 6q13     | -0.00209 | 0.967469 | 0.979845952 |
| HIST1H4F  | 6p22.2   | 0.002092 | 0.967495 | 0.979845952 |
| HNRNPK    | 9q21.32  | -0.00209 | 0.967496 | 0.979845952 |
| CCDC51    | 3p21.31  | 0.00209  | 0.967517 | 0.979845952 |

|            |                 |          |          |             |
|------------|-----------------|----------|----------|-------------|
| KEAP1      | 19p13.2         | -0.00206 | 0.967958 | 0.980206271 |
| KCTD4      | 13q14.12-q14.13 | 0.002061 | 0.96797  | 0.980206271 |
| TSBP1      | 6p21.32         | 0.002036 | 0.968366 | 0.980557721 |
| TRIML2     | 4q35.2          | 0.002029 | 0.968469 | 0.980579966 |
| TRIM23     | 5q12.3          | -0.00203 | 0.968486 | 0.980579966 |
| LRRC37A4P  | 17q21.31        | 0.002011 | 0.968757 | 0.98080459  |
| IKBIP      | 12q23.1         | 0.002005 | 0.968846 | 0.980837441 |
| SMURF1     | 7q22.1          | -0.002   | 0.968887 | 0.980837441 |
| TSSK4      | 14q12           | -0.00199 | 0.969026 | 0.980848979 |
| BABAM2-AS1 | 2p23.2          | 0.001992 | 0.969045 | 0.980848979 |
| CT45A2     | Xq26.3          | -0.00199 | 0.969049 | 0.980848979 |
| ARHGAP27P1 | 17q24.1         | 0.001989 | 0.969095 | 0.980848979 |
| LRRC24     | 8q24.3          | 0.001948 | 0.969723 | 0.981433392 |
| GSDMD      | 8q24.3          | -0.00195 | 0.96977  | 0.981433392 |
| ZBBX       | 3q26.1          | -0.00194 | 0.969852 | 0.981466861 |
| NWD1       | 19p13.11        | 0.001935 | 0.969929 | 0.981494663 |
| SDHAP2     | 3q29            | -0.00193 | 0.970079 | 0.981597597 |
| CEND1      | 11p15.5         | 0.001919 | 0.970186 | 0.981656235 |
| OR2A12     | 7q35            | 0.001912 | 0.970286 | 0.981707754 |
| ZNF687     | 1q21.3          | -0.00191 | 0.970365 | 0.981738079 |
| DCAF16     | 4p15.31         | 0.001902 | 0.970444 | 0.981743075 |
| PTX3       | 3q25.32         | 0.001896 | 0.970531 | 0.981743075 |
| WDR87      | 19q13.13        | -0.00189 | 0.970632 | 0.981743075 |
| FAM182A    | 20p11.1         | -0.00189 | 0.970642 | 0.981743075 |
| NIBAN1     | 1q25.3          | -0.00189 | 0.970646 | 0.981743075 |
| FAM90A7P   | 8p23.1          | -0.00189 | 0.970664 | 0.981743075 |
| MMP21      | 10q26.2         | -0.00188 | 0.970825 | 0.981856165 |
| TENT5B     | 1p36.11         | -0.00185 | 0.971176 | 0.982161537 |
| HSPA1A     | 6p21.33         | 0.001846 | 0.971318 | 0.982255663 |
| PPP1R3G    | 6p25.1          | 0.001827 | 0.971616 | 0.982507016 |
| LINC02249  | 15q13.2         | 0.001815 | 0.971788 | 0.982631809 |
| SBF1       | 22q13.33        | 0.001811 | 0.97185  | 0.982642215 |
| SEPTIN10   | 2q13            | -0.00181 | 0.971897 | 0.982642215 |
| OR10V1     | 11q12.1         | 0.001781 | 0.972317 | 0.983017577 |
| GFAP       | 17q21.31        | 0.001778 | 0.972366 | 0.983017577 |
| OR1L8      | 9q33.2          | 0.00177  | 0.972493 | 0.983095839 |
| KPNA2      | 17q24.2         | 0.00173  | 0.973117 | 0.983648923 |
| TRIM29     | 11q23.3         | -0.00173 | 0.973171 | 0.983648923 |
| GRM7       | 3p26.1          | -0.00172 | 0.973197 | 0.983648923 |
| GAL3ST3    | 11q13.1         | 0.001722 | 0.973236 | 0.983648923 |
| EPHA1      | 7q34-q35        | -0.0017  | 0.973509 | 0.983874557 |
| CCNI2      | 5q31.1          | 0.00169  | 0.973743 | 0.98406149  |
| FOXO4      | Xq13.1          | -0.00169 | 0.97381  | 0.984079426 |
| SILC1      | 2p25.2          | -0.00166 | 0.97427  | 0.984483637 |
| THOC3      | 5q35.2          | 0.001653 | 0.974308 | 0.984483637 |
| SSH3       | 11q13.2         | -0.00165 | 0.974402 | 0.984528584 |
| IGSF8      | 1q23.2          | -0.00164 | 0.974475 | 0.98453322  |
| KCNJ5      | 11q24.3         | 0.001641 | 0.974505 | 0.98453322  |
| PCNX1      | 14q24.2         | 0.001626 | 0.974726 | 0.98464853  |
| AURKAIP1   | 1p36.33         | 0.001626 | 0.974726 | 0.98464853  |
| SMU1       | 9p21.1          | 0.001624 | 0.974766 | 0.98464853  |
| CLRN2      | 4p15.32         | 0.001615 | 0.9749   | 0.984734494 |
| DPRXP4     | 17q11.2         | 0.001603 | 0.975093 | 0.984879045 |
| AGAP11     | 10q23.2         | 0.001598 | 0.975171 | 0.984908266 |
| RASGRP2    | 11q13.1         | 0.001588 | 0.975328 | 0.984958559 |
| LDHC       | 11p15.1         | 0.001587 | 0.975341 | 0.984958559 |
| PAPSS1     | 4q25            | 0.001585 | 0.975368 | 0.984958559 |
| REPS2      | Xp22.2          | -0.00158 | 0.975485 | 0.9850271   |

|              |                 |          |          |             |
|--------------|-----------------|----------|----------|-------------|
| PEX19        | 1q23.2          | 0.001565 | 0.975676 | 0.985169931 |
| OR6K3        | 1q23.1          | 0.001546 | 0.975976 | 0.985394764 |
| PTMAP11      | 9q22.33         | -0.00154 | 0.975997 | 0.985394764 |
| ZNF33B       | 10q11.21        | 0.001531 | 0.976201 | 0.985551072 |
| ZNF79        | 9q33.3          | 0.00152  | 0.976378 | 0.985680347 |
| ANKRD54      | 22q13.1         | -0.0015  | 0.976612 | 0.985867008 |
| SHPRH        | 6q24.3          | -0.0015  | 0.976716 | 0.98590622  |
| MAGEB10      | Xp21.3          | 0.001496 | 0.97675  | 0.98590622  |
| IL5          | 5q31.1          | 0.001485 | 0.976924 | 0.985968523 |
| LINC00599    | 8p23.1          | 0.001484 | 0.976941 | 0.985968523 |
| KCNK15       | 20q13.12        | -0.00148 | 0.976976 | 0.985968523 |
| ALPK2        | 18q21.31-q21.32 | -0.00148 | 0.97702  | 0.985968523 |
| FSCN3        | 7q32.1          | -0.00148 | 0.977058 | 0.985968523 |
| GORASP2      | 2q31.1          | -0.00147 | 0.977151 | 0.986013003 |
| KCNC3        | 19q13.33        | -0.00142 | 0.97787  | 0.98668894  |
| TREH         | 11q23.3         | -0.00141 | 0.978084 | 0.986832501 |
| FAM111B      | 11q12.1         | 0.001408 | 0.978111 | 0.986832501 |
| VPS50        | 7q21.2-q21.3    | -0.0014  | 0.978188 | 0.98683703  |
| OCIAD1       | 4p11            | -0.0014  | 0.978228 | 0.98683703  |
| CATIP        | 2q35            | 0.001397 | 0.978286 | 0.98683703  |
| VCP          | 9p13.3          | -0.00139 | 0.978332 | 0.98683703  |
| ZNF778       | 16q24.3         | -0.00139 | 0.978362 | 0.98683703  |
| TMPRSS15     | 21q21.1         | -0.00138 | 0.978487 | 0.986914035 |
| ZNF628       | 19q13.42        | -0.00137 | 0.97873  | 0.987065617 |
| KCNAB1       | 3q25.31         | -0.00137 | 0.978756 | 0.987065617 |
| PCDHA1       | 5q31.3          | -0.00137 | 0.978785 | 0.987065617 |
| ZNF592       | 15q25.3         | 0.001349 | 0.979037 | 0.987269938 |
| SULT1E1      | 4q13.3          | 0.001335 | 0.979251 | 0.98743519  |
| CALHM1       | 10q24.33        | -0.00133 | 0.979375 | 0.987485066 |
| PPIL4        | 6q25.1          | -0.00133 | 0.979399 | 0.987485066 |
| OPN1MW       | Xq28            | -0.00132 | 0.979495 | 0.987500178 |
| IFNA21       | 9p21.3          | 0.001318 | 0.979512 | 0.987500178 |
| SIRT4        | 12q24.23-q24.31 | 0.001314 | 0.979579 | 0.987518039 |
| AASDH        | 4q12            | -0.00131 | 0.979636 | 0.987525656 |
| STK32B       | 4p16.2          | -0.00129 | 0.97992  | 0.987738168 |
| TEK          | 9p21.2          | -0.00129 | 0.980021 | 0.987738168 |
| C11ORF88     | 11q23.1         | 0.001285 | 0.980026 | 0.987738168 |
| ZKSCAN1      | 7q22.1          | 0.001284 | 0.980044 | 0.987738168 |
| POU4F3       | 5q32            | 0.001263 | 0.980369 | 0.988015721 |
| SNORA11      | Xp11.21         | 0.001254 | 0.980507 | 0.988074469 |
| ZNF491       | 19p13.2         | -0.00125 | 0.980526 | 0.988074469 |
| SP8          | 7p21.1          | 0.00125  | 0.980577 | 0.988076451 |
| FGFR1OP      | 6q27            | 0.001234 | 0.980827 | 0.988278395 |
| CCL3L3       | 17q12           | 0.001222 | 0.981013 | 0.988416119 |
| INSL6        | 9p24.1          | -0.00121 | 0.981244 | 0.988558762 |
| PDE6B        | 4p16.3          | 0.001205 | 0.981273 | 0.988558762 |
| ATF1         | 12q13.12        | 0.001198 | 0.981382 | 0.988558762 |
| FAM71F1      | 7q32.1          | 0.00119  | 0.9815   | 0.988558762 |
| OPN1SW       | 7q32.1          | -0.00119 | 0.981576 | 0.988558762 |
| RNASE2       | 14q11.2         | -0.00118 | 0.9816   | 0.988558762 |
| HOXB1        | 17q21.32        | 0.001183 | 0.981619 | 0.988558762 |
| FAM89A       | 1q42.2          | -0.00118 | 0.981633 | 0.988558762 |
| GPATCH3      | 1p36.11         | -0.00118 | 0.981636 | 0.988558762 |
| NLN          | 5q12.3          | 0.001178 | 0.981687 | 0.988558762 |
| DKFZP434L192 | 7p11.2          | 0.001176 | 0.981725 | 0.988558762 |
| SLC17A2      | 6p22.2          | -0.00117 | 0.981747 | 0.988558762 |
| TSHZ2        | 20q13.2         | 0.001164 | 0.981906 | 0.988662248 |
| KRTAP27-1    | 21q22.11        | -0.00116 | 0.981948 | 0.988662248 |

|            |                |          |          |             |
|------------|----------------|----------|----------|-------------|
| CX3CR1     | 3p22.2         | -0.00116 | 0.982006 | 0.988670666 |
| MRS2P2     | 12q21.1        | 0.001152 | 0.982103 | 0.988679961 |
| OTOL1      | 3q26.1         | 0.001151 | 0.982114 | 0.988679961 |
| SCGB1D1    | 11q12.3        | -0.00114 | 0.982334 | 0.988851475 |
| LINC00602  | 6q27           | 0.001128 | 0.982472 | 0.988940487 |
| IFITM4P    | 6p22.1         | -0.00112 | 0.982554 | 0.988973873 |
| AMOT       | Xq23           | 0.001112 | 0.98271  | 0.989081296 |
| SLC10A1    | 14q24.1        | -0.0011  | 0.982828 | 0.989149934 |
| SPACA5     | Xp11.23        | 0.001083 | 0.983174 | 0.989448401 |
| SNORA49    | 12q24.33       | 0.001059 | 0.983535 | 0.989747664 |
| C17ORF100  | 17p13.1        | -0.00106 | 0.98357  | 0.989747664 |
| EPHB6      | 7q34           | -0.00105 | 0.983664 | 0.989792191 |
| NPVF       | 7p15.3         | -0.00102 | 0.984145 | 0.990226649 |
| STK11      | 19p13.3        | 0.00101  | 0.984309 | 0.990342366 |
| DNAJB11    | 3q27.3         | 0.000968 | 0.984948 | 0.990935489 |
| PROX2      | 14q24.3        | 0.000949 | 0.985243 | 0.991150681 |
| ANP32A-IT1 | 15q23          | -0.00095 | 0.985261 | 0.991150681 |
| OR10AD1    | 12q13.11       | -0.00094 | 0.985348 | 0.991177941 |
| INTS4P2    | 7q11.21        | 0.000939 | 0.985407 | 0.991177941 |
| UBQLN4     | 1q22           | 0.000937 | 0.985437 | 0.991177941 |
| ALMS1P1    | 2p13.1         | -0.00093 | 0.985538 | 0.991230316 |
| ANKS6      | 9q22.33        | -0.00093 | 0.985607 | 0.991249991 |
| OR4D6      | 11q12.1        | 0.00091  | 0.985851 | 0.991406137 |
| GPT2       | 16q11.2        | 0.00091  | 0.985862 | 0.991406137 |
| MYBBP1A    | 17p13.2        | 0.000899 | 0.986022 | 0.991453966 |
| CXCL8      | 4q13.3         | -0.0009  | 0.986056 | 0.991453966 |
| NATD1      | 17p11.2        | -0.00089 | 0.986103 | 0.991453966 |
| HIST1H2BL  | 6p22.1         | -0.00089 | 0.986142 | 0.991453966 |
| ZNF91      | 19p12          | -0.00089 | 0.9862   | 0.991453966 |
| KIF18B     | 17q21.31       | -0.00089 | 0.986206 | 0.991453966 |
| VSIG10     | 12q24.23       | -0.00088 | 0.98628  | 0.99147819  |
| OR2B6      | 6p22.1         | -0.00086 | 0.986625 | 0.991775356 |
| DEDD2      | 19q13.2        | -0.00085 | 0.986782 | 0.991883104 |
| WDR90      | 16p13.3        | -0.00084 | 0.986875 | 0.991927481 |
| CT55       | Xq26.3         | 0.000816 | 0.987318 | 0.992322245 |
| BTNL2      | 6p21.32        | -0.0008  | 0.987637 | 0.992446424 |
| ACER1      | 19p13.3        | 0.000795 | 0.987637 | 0.992446424 |
| S1PR1      | 1p21.2         | -0.00079 | 0.987672 | 0.992446424 |
| DAZ1       | Yq11.223       | -0.00079 | 0.987691 | 0.992446424 |
| CADM3      | 1q23.2         | -0.00079 | 0.987695 | 0.992446424 |
| ATP5PD     | 17q25.1        | 0.000789 | 0.987739 | 0.992446424 |
| NR1I3      | 1q23.3         | 0.000777 | 0.987923 | 0.992502103 |
| GLRA1      | 5q33.1         | -0.00078 | 0.987934 | 0.992502103 |
| ETV1       | 7p21.2         | -0.00078 | 0.987943 | 0.992502103 |
| SASS6      | 1p21.2         | 0.000772 | 0.988006 | 0.992516177 |
| MIS18A     | 21q22.11       | -0.00074 | 0.988518 | 0.992980605 |
| SLC2A7     | 1p36.23        | -0.00074 | 0.988572 | 0.992984472 |
| SSPN       | 12p12.1        | 0.000725 | 0.988729 | 0.993052994 |
| FKTN       | 9q31.2         | -0.00072 | 0.988739 | 0.993052994 |
| NLGN4X     | Xp22.32-p22.31 | -0.00072 | 0.988799 | 0.993063679 |
| CCDC18     | 1p22.1         | 0.000704 | 0.989064 | 0.993279325 |
| LINC00314  | 21q21.3        | 0.000697 | 0.989168 | 0.993334838 |
| SH3KBP1    | Xp22.12        | -0.00069 | 0.989244 | 0.993361143 |
| HMGNA4     | 6p22.2         | -0.00068 | 0.989448 | 0.993442851 |
| PTGES2     | 9q34.11        | 0.000677 | 0.989472 | 0.993442851 |
| TPTE       | 21p11.2        | -0.00068 | 0.989474 | 0.993442851 |
| SLC25A3P1  | 1p32.3         | -0.00067 | 0.989624 | 0.99354279  |
| UGT2A1     | 4q13.3         | 0.000658 | 0.989773 | 0.993642872 |

|           |                |          |          |             |
|-----------|----------------|----------|----------|-------------|
| NOXO1     | 16p13.3        | 0.00065  | 0.989903 | 0.99372406  |
| KLHDC10   | 7q32.2         | 0.000576 | 0.991054 | 0.994786885 |
| CD302     | 2q24.2         | 0.000573 | 0.991091 | 0.994786885 |
| SNORA7B   | 3q21.3         | 0.000572 | 0.991111 | 0.994786885 |
| LINC01566 | 16p11.1        | 0.000564 | 0.991235 | 0.994861365 |
| WNT10B    | 12q13.12       | -0.00055 | 0.991474 | 0.995040381 |
| MR1       | 1q25.3         | 0.000546 | 0.991513 | 0.995040381 |
| FRZB      | 2q32.1         | -0.00054 | 0.991603 | 0.995040564 |
| MICA      | 6p21.33        | 0.000534 | 0.991707 | 0.995040564 |
| CTBP1     | 4p16.3         | -0.00053 | 0.991724 | 0.995040564 |
| IL1R1     | 2q11.2-q12.1   | -0.00053 | 0.991754 | 0.995040564 |
| SNRNP25   | 16p13.3        | 0.000526 | 0.991821 | 0.995040564 |
| PCDHGC5   | 5q31.3         | -0.00053 | 0.991839 | 0.995040564 |
| THAP5     | 7q31.1         | 0.000524 | 0.991861 | 0.995040564 |
| LY96      | 8q21.11        | 0.000517 | 0.991958 | 0.995088061 |
| PATE4     | 11q24.2        | 0.00051  | 0.992076 | 0.995156533 |
| OTUD3     | 1p36.13        | -0.0005  | 0.992266 | 0.995267439 |
| TBCD      | 17q25.3        | 0.000496 | 0.992286 | 0.995267439 |
| OTULINL   | 5p15.2         | 0.000487 | 0.99243  | 0.995361897 |
| CLCC1     | 1p13.3         | 0.000478 | 0.992573 | 0.995456346 |
| ALX4      | 11p11.2        | 0.00047  | 0.992693 | 0.995526292 |
| GUCY2GP   | 10q25.2        | 0.000455 | 0.992923 | 0.99570723  |
| CLEC1B    | 12p13.31-p13.2 | -0.00044 | 0.993207 | 0.995941764 |
| ZNF573    | 19q13.12       | 0.000429 | 0.993328 | 0.996013543 |
| SMG1P5    | 16p11.2        | -0.00043 | 0.99339  | 0.996025744 |
| ZNRD1ASP  | 6p22.1         | 0.000418 | 0.99351  | 0.99609665  |
| MEIOB     | 16p13.3        | 0.000414 | 0.993567 | 0.996103269 |
| ARAF      | Xp11.3         | -0.00041 | 0.993671 | 0.996141615 |
| ZNF442    | 19p13.2        | -0.00041 | 0.993704 | 0.996141615 |
| NOC2L     | 1p36.33        | -0.00039 | 0.993872 | 0.996259458 |
| CCDC69    | 5q33.1         | -0.00038 | 0.994052 | 0.996390705 |
| ZFAT-AS1  | 8q24.22        | -0.00038 | 0.994159 | 0.996448121 |
| HAUS8     | 19p13.11       | -0.00037 | 0.994226 | 0.996465361 |
| MYH8      | 17p13.1        | 0.000366 | 0.994304 | 0.996469584 |
| TM2D2     | 8p11.22        | -0.00036 | 0.99433  | 0.996469584 |
| BCAS2     | 1p13.2         | -0.00036 | 0.994397 | 0.996486785 |
| LCN6      | 9q34.3         | -0.00036 | 0.994449 | 0.996489309 |
| CDKN3     | 14q22.2        | -0.00034 | 0.994715 | 0.996705581 |
| GPR137C   | 14q22.1        | -0.00032 | 0.995029 | 0.996970857 |
| ZNF613    | 19q13.41       | 0.00031  | 0.99518  | 0.997005607 |
| AQP4      | 18q11.2        | -0.00031 | 0.995186 | 0.997005607 |
| CCL18     | 17q12          | 0.000308 | 0.995213 | 0.997005607 |
| LLGL1     | 17p11.2        | 0.000302 | 0.995307 | 0.997049591 |
| POLR2E    | 19p13.3        | -0.00029 | 0.995568 | 0.99725485  |
| SLC1A3    | 5p13.2         | 0.000282 | 0.995612 | 0.99725485  |
| CD200R1L  | 3q13.2         | -0.00028 | 0.995707 | 0.997279101 |
| TMEM87A   | 15q15.1        | -0.00027 | 0.995735 | 0.997279101 |
| FBXO22    | 15q24.2        | -0.00026 | 0.996023 | 0.997517423 |
| SSX7      | Xp11.22        | 0.00024  | 0.996277 | 0.997631694 |
| CCDC126   | 7p15.3         | 0.000239 | 0.996277 | 0.997631694 |
| PRR18     | 6q27           | -0.00024 | 0.996287 | 0.997631694 |
| RASL11A   | 13q12.2        | -0.00023 | 0.996502 | 0.99779704  |
| UNC80     | 2q34           | -0.00021 | 0.996669 | 0.997909058 |
| OR4X2     | 11p11.2        | -0.00021 | 0.996762 | 0.997909058 |
| GPR148    | 2q21.1         | -0.00021 | 0.996765 | 0.997909058 |
| MOK       | 14q32.31       | -0.00021 | 0.996813 | 0.997909058 |
| XRCC3     | 14q32.33       | 0.000193 | 0.997007 | 0.998053454 |
| FBXO42    | 1p36.13        | -0.00016 | 0.997539 | 0.998513684 |

|         |          |          |          |             |
|---------|----------|----------|----------|-------------|
| TTY18   | Yp11.2   | 0.000152 | 0.997631 | 0.998513684 |
| ENPP7   | 17q25.3  | 0.00015  | 0.997662 | 0.998513684 |
| ARSK    | 5q15     | -0.00015 | 0.997666 | 0.998513684 |
| ZNF185  | Xq28     | -0.00014 | 0.997753 | 0.998550853 |
| SYNPO   | 5q33.1   | 0.000129 | 0.997987 | 0.998697886 |
| DSPP    | 4q22.1   | 0.000129 | 0.998    | 0.998697886 |
| MYH1    | 17p13.1  | -0.00012 | 0.998098 | 0.998746654 |
| CENPV   | 17p11.2  | 0.000114 | 0.998222 | 0.998820028 |
| GAL3ST4 | 7q22.1   | 0.000109 | 0.998309 | 0.998857173 |
| TMEM196 | 7p21.1   | #####    | 0.998569 | 0.999068344 |
| PLAC4   | 21q22.2  | #####    | 0.998784 | 0.999216298 |
| RXRB    | 6p21.32  | #####    | 0.998817 | 0.999216298 |
| AMTN    | 4q13.3   | 6.18E-05 | 0.999039 | 0.999341065 |
| KRT78   | 12q13.13 | 6.17E-05 | 0.999042 | 0.999341065 |
| CIAO2A  | 15q22.31 | #####    | 0.999128 | 0.999377846 |
| PLAA    | 9p21.2   | 5.26E-05 | 0.999182 | 0.999381483 |
| TTY9B   | Yq11.222 | 4.31E-05 | 0.99933  | 0.999479981 |
| CLEC18C | 16q22.1  | #####    | 0.999449 | 0.99954842  |
| CACNG3  | 16p12.1  | #####    | 0.999657 | 0.999707254 |
| SLCO1C1 | 12p12.2  | #####    | 0.999916 | 0.999916176 |

**Part 5****Coexpression genes of IQGAP3 in Colorectal Adenocarcinoma**

| <b>Correlated Gene</b> | <b>Cytoband</b> | <b>Spearman</b> | <b>p-Value</b> | <b>q-Value</b> |
|------------------------|-----------------|-----------------|----------------|----------------|
| CENPF                  | 1q41            | 0.724128        | 2.71E-63       | 5.44E-59       |
| KIF14                  | 1q32.1          | 0.680229        | 3.29E-53       | 3.29E-49       |
| ASPM                   | 1q31.3          | 0.672726        | 1.17E-51       | 7.78E-48       |
| MKI67                  | 10q26.2         | 0.648177        | 6.77E-47       | 3.39E-43       |
| ESPL1                  | 12q13.13        | 0.63914         | 2.99E-45       | 1.20E-41       |
| WDR62                  | 19q13.12        | 0.632073        | 5.30E-44       | 1.77E-40       |
| KIFC1                  | 6p21.32         | 0.627868        | 2.83E-43       | 8.11E-40       |
| CHTF18                 | 16p13.3         | 0.626368        | 5.12E-43       | 1.28E-39       |
| WDR90                  | 16p13.3         | 0.624459        | 1.08E-42       | 2.41E-39       |
| POLQ                   | 3q13.33         | 0.623514        | 1.56E-42       | 2.87E-39       |
| KIF18B                 | 17q21.31        | 0.623493        | 1.58E-42       | 2.87E-39       |
| POLE                   | 12q24.33        | 0.615918        | 2.89E-41       | 4.82E-38       |
| SPAG5                  | 17q11.2         | 0.608472        | 4.67E-40       | 7.19E-37       |
| HJURP                  | 2q37.1          | 0.600555        | 8.31E-39       | 1.19E-35       |
| TROAP                  | 12q13.12        | 0.598063        | 2.02E-38       | 2.70E-35       |
| KIF24                  | 9p13.3          | 0.59316         | 1.14E-37       | 1.42E-34       |
| TICRR                  | 15q26.1         | 0.588647        | 5.44E-37       | 6.41E-34       |
| DTL                    | 1q32.3          | 0.580441        | 8.80E-36       | 9.79E-33       |
| CCNF                   | 16p13.3         | 0.578751        | 1.55E-35       | 1.63E-32       |
| KIF11                  | 10q23.33        | 0.574515        | 6.25E-35       | 6.26E-32       |
| ZGRF1                  | 4q25            | 0.572439        | 1.23E-34       | 1.17E-31       |
| DDX12P                 | 12p13.31        | 0.572112        | 1.37E-34       | 1.25E-31       |
| GTSE1                  | 22q13.31        | 0.570876        | 2.04E-34       | 1.78E-31       |
| EXO1                   | 1q43            | 0.569993        | 2.72E-34       | 2.27E-31       |
| PRC1                   | 15q26.1         | 0.569844        | 2.85E-34       | 2.29E-31       |
| C21ORF58               | 21q22.3         | 0.568316        | 4.66E-34       | 3.59E-31       |
| PKMYT1                 | 16p13.3         | 0.563044        | 2.49E-33       | 1.85E-30       |
| KNTC1                  | 12q24.31        | 0.559835        | 6.81E-33       | 4.87E-30       |
| FAM72D                 | 1q21.1          | 0.556297        | 2.04E-32       | 1.41E-29       |
| INCENP                 | 11q12.3         | 0.555207        | 2.85E-32       | 1.90E-29       |
| NSD2                   | 4p16.3          | 0.552811        | 5.92E-32       | 3.83E-29       |
| TACC3                  | 4p16.3          | 0.549954        | 1.41E-31       | 8.80E-29       |
| CENPE                  | 4q24            | 0.548937        | 1.91E-31       | 1.16E-28       |
| PLK1                   | 16p12.2         | 0.546196        | 4.34E-31       | 2.55E-28       |
| SHCBP1                 | 16q11.2         | 0.545364        | 5.55E-31       | 3.06E-28       |
| TCF19                  | 6p21.33         | 0.545352        | 5.57E-31       | 3.06E-28       |
| CHAF1A                 | 19p13.3         | 0.545305        | 5.65E-31       | 3.06E-28       |
| RUSC1-AS1              | 1q22            | 0.544145        | 7.97E-31       | 4.20E-28       |
| NEK2                   | 1q32.3          | 0.542637        | 1.24E-30       | 6.38E-28       |
| KIF2C                  | 1p34.1          | 0.538195        | 4.54E-30       | 2.27E-27       |
| CIT                    | 12q24.23        | 0.536813        | 6.77E-30       | 3.31E-27       |
| FANCI                  | 15q26.1         | 0.533884        | 1.57E-29       | 7.49E-27       |
| YPEL5                  | 2p23.1          | -0.53345        | 1.78E-29       | 8.27E-27       |
| GEN1                   | 2p24.2          | 0.532768        | 2.16E-29       | 9.82E-27       |
| FANCA                  | 16q24.3         | 0.531525        | 3.07E-29       | 1.37E-26       |
| SPC24                  | 19p13.2         | 0.530115        | 4.58E-29       | 1.99E-26       |
| UHRF1                  | 19p13.3         | 0.529422        | 5.56E-29       | 2.37E-26       |
| NUF2                   | 1q23.3          | 0.528778        | 6.67E-29       | 2.78E-26       |
| CCDC150                | 2q33.1          | 0.524635        | 2.12E-28       | 8.65E-26       |
| BRCA1                  | 17q21.31        | 0.524265        | 2.34E-28       | 9.39E-26       |
| E2F2                   | 1p36.12         | 0.52392         | 2.58E-28       | 1.01E-25       |
| E2F8                   | 11p15.1         | 0.523076        | 3.26E-28       | 1.25E-25       |
| CDCA8                  | 1p34.3          | 0.522196        | 4.15E-28       | 1.57E-25       |
| LIG1                   | 19q13.33        | 0.521791        | 4.64E-28       | 1.72E-25       |
| RECQL4                 | 8q24.3          | 0.521537        | 4.97E-28       | 1.81E-25       |



|           |                      |          |          |          |
|-----------|----------------------|----------|----------|----------|
| LOC642846 | 12p13.31             | 0.520699 | 6.25E-28 | 2.24E-25 |
| DNMT1     | 19p13.2              | 0.517054 | 1.68E-27 | 5.91E-25 |
| FOXM1     | 12p13.33             | 0.516925 | 1.74E-27 | 6.02E-25 |
| MCM10     | 10p13                | 0.515369 | 2.65E-27 | 8.99E-25 |
| CEP55     | 10q23.33             | 0.514447 | 3.39E-27 | 1.12E-24 |
| MCM3      | 6p12.2               | 0.514421 | 3.42E-27 | 1.12E-24 |
| KIF20A    | 5q31.2               | 0.514032 | 3.79E-27 | 1.22E-24 |
| TTC13     | 1q42.2               | 0.509541 | 1.25E-26 | 3.97E-24 |
| DAZAP1    | 19p13.3              | 0.505127 | 3.96E-26 | 1.24E-23 |
| MELK      | 9p13.2               | 0.505023 | 4.07E-26 | 1.25E-23 |
| PIF1      | 15q22.31             | 0.504549 | 4.60E-26 | 1.40E-23 |
| UBE2T     | 1q32.1               | 0.502993 | 6.88E-26 | 2.06E-23 |
| ODF2      | 9q34.11              | 0.502569 | 7.67E-26 | 2.26E-23 |
| FANCD2    | 3p25.3               | 0.502376 | 8.07E-26 | 2.34E-23 |
| KIF23     | 15q23                | 0.500383 | 1.34E-25 | 3.85E-23 |
| LMNB2     | 19p13.3              | 0.499546 | 1.67E-25 | 4.70E-23 |
| MASTL     | 10p12.1              | 0.499101 | 1.86E-25 | 5.19E-23 |
| HCN3      | 1q22                 | 0.498543 | 2.15E-25 | 5.90E-23 |
| RAD54L    | 1p34.1               | 0.498217 | 2.33E-25 | 6.32E-23 |
| AFG3L1P   | 16q24.3              | 0.497394 | 2.88E-25 | 7.68E-23 |
| ANLN      | 7p14.2               | 0.496991 | 3.18E-25 | 8.39E-23 |
| ARHGAP33  | 19q13.12             | 0.495866 | 4.23E-25 | 1.10E-22 |
| PCNT      | 21q22.3              | 0.495604 | 4.52E-25 | 1.16E-22 |
| KIF4A     | Xq13.1               | 0.492402 | 1.01E-24 | 2.55E-22 |
| XRCC2     | 7q36.1               | 0.492208 | 1.06E-24 | 2.65E-22 |
| POLD1     | 19q13.33             | 0.492093 | 1.09E-24 | 2.68E-22 |
| C17ORF53  | 17q21.31             | 0.492052 | 1.10E-24 | 2.68E-22 |
| DOT1L     | 19p13.3              | 0.491499 | 1.26E-24 | 3.04E-22 |
| EZH2      | 7q36.1               | 0.491342 | 1.31E-24 | 3.12E-22 |
| NCAPG     | 4p15.31              | 0.488272 | 2.80E-24 | 6.59E-22 |
| NCAPG2    | 7q36.3               | 0.486835 | 3.98E-24 | 9.26E-22 |
| CDT1      | 16q24.3              | 0.486274 | 4.56E-24 | 1.05E-21 |
| DONSON    | 21q22.11             | 0.486234 | 4.61E-24 | 1.05E-21 |
| CKAP2L    | 2q14.1               | 0.485226 | 5.89E-24 | 1.32E-21 |
| FAM72A    | 1q32.1               | 0.484617 | 6.83E-24 | 1.52E-21 |
| NUP188    | 9q34.11              | 0.484199 | 7.56E-24 | 1.66E-21 |
| ZWINT     | 10q21.1              | 0.480993 | 1.64E-23 | 3.56E-21 |
| DNAJB9    | 7q31.1 14q24.2-q24.3 | -0.48082 | 1.70E-23 | 3.67E-21 |
| ZNF695    | 1q44                 | 0.480698 | 1.76E-23 | 3.74E-21 |
| LAPTM4A   | 2p24.1               | -0.48054 | 1.83E-23 | 3.85E-21 |
| BUB1B     | 15q15.1              | 0.479281 | 2.46E-23 | 5.14E-21 |
| ZNF367    | 9q22.32 9q22.32      | 0.4791   | 2.57E-23 | 5.31E-21 |
| CAPN15    | 16p13.3              | 0.476607 | 4.65E-23 | 9.50E-21 |
| CEP152    | 15q21.1              | 0.476492 | 4.78E-23 | 9.67E-21 |
| PASK      | 2q37.3               | 0.476441 | 4.84E-23 | 9.69E-21 |
| SMC4      | 3q25.33              | 0.476138 | 5.19E-23 | 1.03E-20 |
| RACGAP1   | 12q13.12             | 0.47603  | 5.33E-23 | 1.05E-20 |
| CCDC18    | 1p22.1               | 0.475001 | 6.79E-23 | 1.32E-20 |
| TONSL     | 8q24.3               | 0.47444  | 7.75E-23 | 1.49E-20 |
| ITPR3     | 6p21.31              | 0.471541 | 1.52E-22 | 2.91E-20 |
| NFATC2IP  | 16p11.2              | 0.47094  | 1.75E-22 | 3.31E-20 |
| NCAPH     | 2q11.2               | 0.470216 | 2.07E-22 | 3.88E-20 |
| PRCP      | 11q14.1              | -0.4691  | 2.68E-22 | 4.97E-20 |
| CENPL     | 1q25.1               | 0.46907  | 2.70E-22 | 4.97E-20 |
| HASPIN    | 17p13.2              | 0.468704 | 2.94E-22 | 5.35E-20 |
| KIF22     | 16p11.2              | 0.468596 | 3.01E-22 | 5.44E-20 |
| TOP2A     | 17q21.2              | 0.468514 | 3.07E-22 | 5.49E-20 |
| ARHGAP11B | 15q13.2              | 0.468422 | 3.14E-22 | 5.56E-20 |

|           |          |          |          |          |
|-----------|----------|----------|----------|----------|
| TTK       | 6q14.1   | 0.467999 | 3.46E-22 | 6.07E-20 |
| CDCA3     | 12p13.31 | 0.46734  | 4.02E-22 | 7.01E-20 |
| KIF20B    | 10q23.31 | 0.466173 | 5.25E-22 | 9.07E-20 |
| BLM       | 15q26.1  | 0.465621 | 5.96E-22 | 1.02E-19 |
| ARHGAP11A | 15q13.3  | 0.465134 | 6.66E-22 | 1.13E-19 |
| SRRT      | 7q22.1   | 0.465081 | 6.74E-22 | 1.13E-19 |
| MTFR2     | 6q23.3   | 0.464789 | 7.20E-22 | 1.20E-19 |
| BUB1      | 2q13     | 0.46412  | 8.38E-22 | 1.39E-19 |
| TRIM11    | 1q42.13  | 0.4639   | 8.81E-22 | 1.45E-19 |
| NCAPD2    | 12p13.31 | 0.463607 | 9.42E-22 | 1.53E-19 |
| PTBP1     | 19p13.3  | 0.46258  | 1.19E-21 | 1.92E-19 |
| ASF1B     | 19p13.12 | 0.461146 | 1.64E-21 | 2.63E-19 |
| DDX11     | 12p11.21 | 0.46014  | 2.06E-21 | 3.27E-19 |
| SNAPC4    | 9q34.3   | 0.458837 | 2.75E-21 | 4.34E-19 |
| KNL1      | 15q15.1  | 0.458662 | 2.86E-21 | 4.48E-19 |
| FAM72B    | 1p11.2   | 0.458069 | 3.26E-21 | 5.00E-19 |
| RUSC1     | 1q22     | 0.458067 | 3.27E-21 | 5.00E-19 |
| TCERG1    | 5q32     | 0.458059 | 3.27E-21 | 5.00E-19 |
| CDK1      | 10q21.2  | 0.456953 | 4.18E-21 | 6.35E-19 |
| NCAPD3    | 11q25    | 0.456851 | 4.28E-21 | 6.44E-19 |
| CDCA5     | 11q13.1  | 0.455776 | 5.43E-21 | 8.11E-19 |
| SGO1      | 3p24.3   | 0.454653 | 6.95E-21 | 1.03E-18 |
| HAUS5     | 19q13.12 | 0.453053 | 9.87E-21 | 1.45E-18 |
| PLK4      | 4q28.1   | 0.452309 | 1.16E-20 | 1.70E-18 |
| E2F7      | 12q21.2  | 0.452205 | 1.19E-20 | 1.72E-18 |
| MMS22L    | 6q16.1   | 0.451189 | 1.48E-20 | 2.12E-18 |
| IDI2-AS1  | 10p15.3  | 0.45118  | 1.49E-20 | 2.12E-18 |
| MDC1      | 6p21.33  | 0.450438 | 1.75E-20 | 2.48E-18 |
| TIMELESS  | 12q13.3  | 0.449869 | 1.97E-20 | 2.78E-18 |
| AHCTF1    | 1q44     | 0.449705 | 2.05E-20 | 2.85E-18 |
| NUSAP1    | 15q15.1  | 0.449702 | 2.05E-20 | 2.85E-18 |
| SKA3      | 13q12.11 | 0.448852 | 2.46E-20 | 3.40E-18 |
| ILF3      | 19p13.2  | 0.446225 | 4.32E-20 | 5.93E-18 |
| FKBP7     | 2q31.2   | -0.44433 | 6.47E-20 | 8.82E-18 |
| MYO19     | 17q12    | 0.444087 | 6.82E-20 | 9.23E-18 |
| DENND4B   | 1q21.3   | 0.44252  | 9.51E-20 | 1.28E-17 |
| WDR34     | 9q34.11  | 0.442367 | 9.82E-20 | 1.31E-17 |
| ATAD2     | 8q24.13  | 0.441477 | 1.18E-19 | 1.57E-17 |
| ZNF833P   | 19p13.2  | 0.4404   | 1.49E-19 | 1.96E-17 |
| AARS2     | 6p21.1   | 0.44032  | 1.51E-19 | 1.98E-17 |
| STIL      | 1p33     | 0.439724 | 1.71E-19 | 2.23E-17 |
| BCAS3     | 17q23.2  | -0.43817 | 2.37E-19 | 3.06E-17 |
| IPO9      | 1q32.1   | 0.437206 | 2.89E-19 | 3.71E-17 |
| CENPI     | Xq22.1   | 0.437145 | 2.93E-19 | 3.74E-17 |
| ATAD5     | 17q11.2  | 0.436407 | 3.41E-19 | 4.33E-17 |
| RRM2B     | 8q22.3   | -0.43569 | 3.96E-19 | 4.98E-17 |
| ORC6      | 16q11.2  | 0.433914 | 5.71E-19 | 7.15E-17 |
| LMNB1     | 5q23.2   | 0.433557 | 6.14E-19 | 7.64E-17 |
| DNA2      | 10q21.3  | 0.433465 | 6.26E-19 | 7.74E-17 |
| PSRC1     | 1p13.3   | 0.433223 | 6.58E-19 | 8.08E-17 |
| C1ORF35   | 1q42.13  | 0.432224 | 8.07E-19 | 9.86E-17 |
| ERLEC1    | 2p16.2   | -0.43214 | 8.22E-19 | 9.97E-17 |
| NDC80     | 18p11.32 | 0.43139  | 9.57E-19 | 1.15E-16 |
| FEN1      | 11q12.2  | 0.430058 | 1.25E-18 | 1.50E-16 |
| SUGP2     | 19p13.11 | 0.429524 | 1.40E-18 | 1.67E-16 |
| MAP3K21   | 1q42.2   | 0.429383 | 1.44E-18 | 1.70E-16 |
| CKAP5     | 11p11.2  | 0.42766  | 2.04E-18 | 2.40E-16 |
| EME1      | 17q21.33 | 0.427596 | 2.06E-18 | 2.41E-16 |

|           |                |          |          |          |
|-----------|----------------|----------|----------|----------|
| RNF11     | 1p32.3         | -0.42565 | 3.05E-18 | 3.55E-16 |
| BRCA2     | 13q13.1        | 0.42382  | 4.39E-18 | 5.08E-16 |
| AUNIP     | 1p36.11        | 0.423414 | 4.75E-18 | 5.47E-16 |
| LENG8     | 19q13.42       | 0.422743 | 5.43E-18 | 6.21E-16 |
| CCNA2     | 4q27           | 0.42252  | 5.67E-18 | 6.46E-16 |
| ACAP3     | 1p36.33        | 0.421708 | 6.66E-18 | 7.54E-16 |
| CIP2A     | 3q13.13        | 0.421222 | 7.33E-18 | 8.25E-16 |
| PROSER3   | 19q13.12       | 0.420418 | 8.59E-18 | 9.61E-16 |
| C2ORF48   | 2p25.1         | 0.420368 | 8.67E-18 | 9.65E-16 |
| KIAA0895L | 16q22.1        | 0.420226 | 8.92E-18 | 9.87E-16 |
| AGAP6     | 10q11.23       | 0.420093 | 9.15E-18 | 1.01E-15 |
| ADAM15    | 1q21.3         | 0.42     | 9.32E-18 | 1.02E-15 |
| CDC25C    | 5q31.2         | 0.41982  | 9.66E-18 | 1.05E-15 |
| KIF15     | 3p21.31        | 0.419423 | 1.04E-17 | 1.13E-15 |
| SMC2      | 9q31.1         | 0.419021 | 1.13E-17 | 1.21E-15 |
| FANCG     | 9p13.3         | 0.419009 | 1.13E-17 | 1.21E-15 |
| CENPN     | 16q23.2        | 0.41881  | 1.18E-17 | 1.25E-15 |
| TELO2     | 16p13.3        | 0.41876  | 1.19E-17 | 1.26E-15 |
| TEDC2     | 16p13.3        | 0.418722 | 1.20E-17 | 1.26E-15 |
| GOLGA2P5  | 12q23.1        | 0.417208 | 1.61E-17 | 1.69E-15 |
| UBXN11    | 1p36.11        | 0.417123 | 1.63E-17 | 1.70E-15 |
| KHDC4     | 1q22           | 0.417091 | 1.64E-17 | 1.71E-15 |
| TMPO-AS1  | 12q23.1        | 0.41698  | 1.68E-17 | 1.73E-15 |
| DIAPH3    | 13q21.2        | 0.416128 | 1.98E-17 | 2.04E-15 |
| RBM15     | 1p13.3         | 0.415925 | 2.06E-17 | 2.10E-15 |
| TENT4A    | 5p15.31        | 0.415923 | 2.06E-17 | 2.10E-15 |
| LY6G5B    | 6p21.33        | 0.415756 | 2.13E-17 | 2.15E-15 |
| DBF4B     | 17q21.31 17q21 | 0.41561  | 2.19E-17 | 2.20E-15 |
| SH3BGRL   | Xq21.1         | -0.41538 | 2.29E-17 | 2.29E-15 |
| SEC31B    | 10q24.31       | 0.4151   | 2.42E-17 | 2.41E-15 |
| TTF2      | 1p13.1         | 0.41441  | 2.76E-17 | 2.73E-15 |
| DUSP19    | 2q32.1         | -0.41439 | 2.77E-17 | 2.73E-15 |
| KIF18A    | 11p14.1        | 0.413939 | 3.02E-17 | 2.97E-15 |
| DDX39B    | 6p21.33        | 0.413742 | 3.14E-17 | 3.07E-15 |
| C1ORF112  | 1q24.2         | 0.412971 | 3.64E-17 | 3.54E-15 |
| PHF19     | 9q33.2         | 0.412747 | 3.80E-17 | 3.68E-15 |
| CHTOP     | 1q21.3         | 0.412271 | 4.16E-17 | 4.01E-15 |
| RSKR      | 17q11.2        | 0.411646 | 4.69E-17 | 4.49E-15 |
| TCOF1     | 5q32-q33.1     | 0.411481 | 4.84E-17 | 4.62E-15 |
| CENPW     | 6q22.32        | 0.410891 | 5.41E-17 | 5.14E-15 |
| MYBL2     | 20q13.12       | 0.410828 | 5.48E-17 | 5.14E-15 |
| ZNF789    | 7q22.1         | 0.410822 | 5.49E-17 | 5.14E-15 |
| HNRNPA2B1 | 7p15.2         | 0.410817 | 5.49E-17 | 5.14E-15 |
| MSH5      | 6p21.33        | 0.410649 | 5.67E-17 | 5.28E-15 |
| NEMP1     | 12q13.3        | 0.410116 | 6.27E-17 | 5.82E-15 |
| ATAD3B    | 1p36.33        | 0.409188 | 7.48E-17 | 6.90E-15 |
| E2F1      | 20q11.22       | 0.409157 | 7.52E-17 | 6.90E-15 |
| RNF13     | 3q25.1         | -0.40914 | 7.55E-17 | 6.90E-15 |
| IFT46     | 11q23.3        | -0.40884 | 7.99E-17 | 7.27E-15 |
| LRP8      | 1p32.3         | 0.408301 | 8.84E-17 | 8.01E-15 |
| HDGF      | 1q23.1         | 0.408015 | 9.33E-17 | 8.42E-15 |
| CLK2      | 1q22           | 0.407732 | 9.84E-17 | 8.84E-15 |
| BMT2      | 7q31.1         | -0.40734 | 1.06E-16 | 9.47E-15 |
| ACVR1     | 2q24.1         | -0.40732 | 1.06E-16 | 9.47E-15 |
| LIN9      | 1q42.12        | 0.406869 | 1.16E-16 | 1.03E-14 |
| RRM1      | 11p15.4        | 0.406816 | 1.17E-16 | 1.03E-14 |
| TXNDC15   | 5q31.1         | -0.40675 | 1.18E-16 | 1.04E-14 |
| CTSO      | 4q32.1         | -0.40607 | 1.34E-16 | 1.18E-14 |

|            |                 |          |          |          |
|------------|-----------------|----------|----------|----------|
| CEP170B    | 14q32.33        | 0.405635 | 1.46E-16 | 1.27E-14 |
| HBP1       | 7q22.3          | -0.40464 | 1.76E-16 | 1.52E-14 |
| AURKB      | 17p13.1         | 0.404571 | 1.78E-16 | 1.54E-14 |
| CKS1B      | 1q21.3          | 0.403976 | 1.99E-16 | 1.71E-14 |
| CDC45      | 22q11.21        | 0.403872 | 2.03E-16 | 1.73E-14 |
| BRICD5     | 16p13.3         | 0.403346 | 2.23E-16 | 1.90E-14 |
| HMGB2      | 4q34.1          | 0.403014 | 2.38E-16 | 2.02E-14 |
| PIDD1      | 11p15.5         | 0.402836 | 2.46E-16 | 2.07E-14 |
| FANCC      | 9q22.32         | 0.402627 | 2.55E-16 | 2.15E-14 |
| CDC7       | 1p22.1          | 0.402509 | 2.61E-16 | 2.19E-14 |
| DLGAP5     | 14q22.3         | 0.402246 | 2.74E-16 | 2.28E-14 |
| MSTO1      | 1q22            | 0.401902 | 2.92E-16 | 2.42E-14 |
| YBX2       | 17p13.1         | 0.40099  | 3.45E-16 | 2.86E-14 |
| PAXIP1     | 7q36.2          | 0.400426 | 3.83E-16 | 3.16E-14 |
| ORC1       | 1p32.3          | 0.400365 | 3.87E-16 | 3.18E-14 |
| SNRNP70    | 19q13.33        | 0.400218 | 3.98E-16 | 3.25E-14 |
| CEP78      | 9q21.2          | 0.39947  | 4.56E-16 | 3.71E-14 |
| EME2       | 16p13.3         | 0.39893  | 5.04E-16 | 4.08E-14 |
| CDC25A     | 3p21.31         | 0.39866  | 5.29E-16 | 4.26E-14 |
| XRCC3      | 14q32.33        | 0.39866  | 5.29E-16 | 4.26E-14 |
| NEIL3      | 4q34.3          | 0.397749 | 6.25E-16 | 5.00E-14 |
| ZNF692     | 1q44            | 0.397677 | 6.33E-16 | 5.05E-14 |
| LTB4R2     | 14q12           | 0.397491 | 6.55E-16 | 5.20E-14 |
| ERCC6L     | Xq13.1          | 0.397367 | 6.69E-16 | 5.29E-14 |
| HNRNPU-AS1 | -               | 0.397359 | 6.70E-16 | 5.29E-14 |
| KLHL17     | 1p36.33         | 0.396649 | 7.63E-16 | 5.99E-14 |
| CENPA      | 2p23.3          | 0.396493 | 7.85E-16 | 6.14E-14 |
| SEC62      | 3q26.2          | -0.39575 | 8.98E-16 | 7.00E-14 |
| MST1R      | 3p21.31         | 0.39563  | 9.17E-16 | 7.12E-14 |
| AGAP4      | 10q11.22        | 0.395369 | 9.61E-16 | 7.43E-14 |
| GABARAPL1  | 12p13.2         | -0.39507 | 1.01E-15 | 7.81E-14 |
| CCNB2      | 15q22.2         | 0.394712 | 1.08E-15 | 8.30E-14 |
| HCFC1      | Xq28            | 0.393662 | 1.31E-15 | 9.99E-14 |
| CLSPN      | 1p34.3          | 0.393372 | 1.38E-15 | 1.05E-13 |
| RBM14      | 11q13.2         | 0.393138 | 1.44E-15 | 1.09E-13 |
| ARHGEF39   | 9p13.3          | 0.392994 | 1.47E-15 | 1.11E-13 |
| CENPO      | 2p23.3          | 0.392967 | 1.48E-15 | 1.11E-13 |
| CHAF1B     | 21q22.12-q22.13 | 0.392722 | 1.55E-15 | 1.16E-13 |
| CLASRP     | 19q13.32        | 0.392663 | 1.56E-15 | 1.17E-13 |
| IGFBP7     | 4q12            | -0.3926  | 1.58E-15 | 1.18E-13 |
| C9ORF163   | 9q34.3          | 0.392385 | 1.64E-15 | 1.22E-13 |
| SMPD4      | 2q21.1          | 0.392331 | 1.66E-15 | 1.23E-13 |
| PLPP1      | 5q11.2          | -0.39178 | 1.83E-15 | 1.35E-13 |
| FAM193B    | 5q35.3          | 0.391546 | 1.91E-15 | 1.40E-13 |
| TPM3       | 1q21.3          | 0.391271 | 2.00E-15 | 1.47E-13 |
| CDC20      | 1p34.2          | 0.391237 | 2.02E-15 | 1.47E-13 |
| ACTR10     | 14q23.1         | -0.3908  | 2.18E-15 | 1.58E-13 |
| CGRRF1     | 14q22.2         | -0.38996 | 2.53E-15 | 1.83E-13 |
| UBQLN4     | 1q22            | 0.389573 | 2.71E-15 | 1.95E-13 |
| SRRM2      | 16p13.3         | 0.389337 | 2.83E-15 | 2.03E-13 |
| MATN3      | 2p24.1          | -0.38909 | 2.95E-15 | 2.11E-13 |
| PTTG1      | 5q33.3          | 0.388993 | 3.00E-15 | 2.14E-13 |
| MXD3       | 5q35.3          | 0.388827 | 3.09E-15 | 2.20E-13 |
| A2M-AS1    | 12p13.31        | -0.38878 | 3.12E-15 | 2.20E-13 |
| FAM111B    | 11q12.1         | 0.388722 | 3.15E-15 | 2.22E-13 |
| NDOR1      | 9q34.3          | 0.388577 | 3.23E-15 | 2.27E-13 |
| ZMYND19    | 9q34.3          | 0.387786 | 3.71E-15 | 2.60E-13 |
| SPOP       | 17q21.33        | -0.38756 | 3.87E-15 | 2.70E-13 |

|           |                 |          |          |          |
|-----------|-----------------|----------|----------|----------|
| ZNF598    | 16p13.3         | 0.387158 | 4.15E-15 | 2.88E-13 |
| CHD1L     | 1q21.1          | 0.386947 | 4.30E-15 | 2.98E-13 |
| DNAJC9    | 10q22.2         | 0.386762 | 4.45E-15 | 3.07E-13 |
| DUSP11    | 2p13.1          | -0.38675 | 4.45E-15 | 3.07E-13 |
| TAF5      | 10q24.33        | 0.386502 | 4.65E-15 | 3.19E-13 |
| PRDM15    | 21q22.3         | 0.385483 | 5.56E-15 | 3.80E-13 |
| CENPJ     | 13q12.12-q12.13 | 0.385231 | 5.81E-15 | 3.96E-13 |
| FAM156A   | Xp11.22         | 0.385068 | 5.98E-15 | 4.06E-13 |
| WDR27     | 6q27            | 0.38482  | 6.24E-15 | 4.22E-13 |
| NACC1     | 19p13.13        | 0.384607 | 6.48E-15 | 4.37E-13 |
| CEP295    | 11q21           | 0.384533 | 6.56E-15 | 4.41E-13 |
| CDC6      | 17q21.2         | 0.383241 | 8.21E-15 | 5.50E-13 |
| SERPINI1  | 3q26.1          | -0.38302 | 8.53E-15 | 5.69E-13 |
| CCSAP     | 1q42.13         | 0.382539 | 9.27E-15 | 6.17E-13 |
| FAM229B   | 6q21            | -0.38241 | 9.48E-15 | 6.29E-13 |
| KMT2B     | 19q13.12        | 0.382301 | 9.66E-15 | 6.39E-13 |
| TRIP13    | 5p15.33         | 0.38155  | 1.10E-14 | 7.24E-13 |
| PIK3IP1   | 22q12.2         | -0.38152 | 1.11E-14 | 7.26E-13 |
| PNN       | 14q21.1         | 0.381456 | 1.12E-14 | 7.31E-13 |
| C1ORF159  | 1p36.33         | 0.381382 | 1.13E-14 | 7.38E-13 |
| DGCR8     | 22q11.21        | 0.381252 | 1.16E-14 | 7.53E-13 |
| FGF14     | 13q33.1         | -0.38118 | 1.17E-14 | 7.60E-13 |
| SKA1      | 18q21.1         | 0.381032 | 1.20E-14 | 7.77E-13 |
| POC1A     | 3p21.2          | 0.380663 | 1.28E-14 | 8.25E-13 |
| PLEKHA3   | 2q31.2          | -0.38038 | 1.34E-14 | 8.63E-13 |
| PGP       | 16p13.3         | 0.380235 | 1.38E-14 | 8.82E-13 |
| NKTR      | 3p22.1          | 0.380206 | 1.39E-14 | 8.84E-13 |
| INTS3     | 1q21.3          | 0.380125 | 1.40E-14 | 8.93E-13 |
| GABPB2    | 1q21.3          | 0.380038 | 1.43E-14 | 9.04E-13 |
| CD59      | 11p13           | -0.37996 | 1.44E-14 | 9.13E-13 |
| CCNB1     | 5q13.2          | 0.37989  | 1.46E-14 | 9.21E-13 |
| CDK2      | 12q13.2         | 0.379778 | 1.49E-14 | 9.36E-13 |
| PPP1R26   | 9q34.3          | 0.379752 | 1.50E-14 | 9.37E-13 |
| ATG16L2   | 11q13.4         | 0.379618 | 1.53E-14 | 9.56E-13 |
| TCEAL7    | Xq22.2          | -0.37933 | 1.61E-14 | 1.00E-12 |
| POLA2     | 11q13.1         | 0.379077 | 1.68E-14 | 1.04E-12 |
| THOP1     | 19p13.3         | 0.37896  | 1.71E-14 | 1.06E-12 |
| DYNC112   | 2q31.1          | -0.37864 | 1.81E-14 | 1.12E-12 |
| MIGA2     | 9q34.11         | 0.378506 | 1.85E-14 | 1.14E-12 |
| TOPBP1    | 3q22.1          | 0.378383 | 1.89E-14 | 1.16E-12 |
| TRAIP     | 3p21.31         | 0.378366 | 1.90E-14 | 1.16E-12 |
| TTC33     | 5p13.1          | -0.37782 | 2.08E-14 | 1.27E-12 |
| SLX4      | 16p13.3         | 0.377797 | 2.09E-14 | 1.27E-12 |
| BRIP1     | 17q23.2         | 0.377695 | 2.13E-14 | 1.29E-12 |
| DEPDC1B   | 5q12.1          | 0.377594 | 2.16E-14 | 1.31E-12 |
| SPDL1     | 5q35.1          | 0.376688 | 2.52E-14 | 1.52E-12 |
| LOC150776 | 2q21.1          | 0.376621 | 2.55E-14 | 1.53E-12 |
| BMPR2     | 2q33.1-q33.2    | -0.37658 | 2.57E-14 | 1.54E-12 |
| CCDC90B   | 11q14.1         | -0.37643 | 2.63E-14 | 1.57E-12 |
| SLC7A5P2  | 16p12.2         | 0.376432 | 2.63E-14 | 1.57E-12 |
| PPRC1     | 10q24.32        | 0.376213 | 2.73E-14 | 1.62E-12 |
| RRM2      | 2p25.1          | 0.376103 | 2.79E-14 | 1.65E-12 |
| OLFML3    | 1p13.2          | -0.37605 | 2.81E-14 | 1.66E-12 |
| RAD51     | 15q15.1         | 0.376004 | 2.83E-14 | 1.66E-12 |
| FDPSP2    | 7q11.23         | 0.375895 | 2.89E-14 | 1.69E-12 |
| NASP      | 1p34.1          | 0.375752 | 2.96E-14 | 1.73E-12 |
| RCCD1     | 15q26.1         | 0.375662 | 3.00E-14 | 1.75E-12 |
| DHFR      | 5q14.1          | 0.375334 | 3.17E-14 | 1.84E-12 |

|            |               |          |          |          |
|------------|---------------|----------|----------|----------|
| GTPBP3     | 19p13.11      | 0.374451 | 3.68E-14 | 2.13E-12 |
| VARS       | 6p21.33       | 0.374371 | 3.73E-14 | 2.15E-12 |
| MND1       | 4q31.3        | 0.37432  | 3.76E-14 | 2.16E-12 |
| TUBB4B     | 9q34.3        | 0.374266 | 3.80E-14 | 2.18E-12 |
| TUBA1A     | 12q13.12      | -0.37394 | 4.01E-14 | 2.29E-12 |
| ZNF37BP    | 10q11.21      | 0.372585 | 5.03E-14 | 2.87E-12 |
| TEDC1      | 14q32.33      | 0.37197  | 5.57E-14 | 3.17E-12 |
| CCHCR1     | 6p21.33       | 0.371849 | 5.69E-14 | 3.23E-12 |
| PNRC1      | 6q15          | -0.37176 | 5.77E-14 | 3.26E-12 |
| SAPCD1     | 6p21.33       | 0.371368 | 6.16E-14 | 3.48E-12 |
| HAUS8      | 19p13.11      | 0.371005 | 6.54E-14 | 3.68E-12 |
| SRSF2      | 17q25.1       | 0.370861 | 6.70E-14 | 3.76E-12 |
| UBE2S      | 19q13.42      | 0.370809 | 6.76E-14 | 3.78E-12 |
| PAQR4      | 16p13.3       | 0.370788 | 6.79E-14 | 3.78E-12 |
| SAPCD2     | 9q34.3        | 0.370772 | 6.80E-14 | 3.78E-12 |
| CPQ        | 8q22.1        | -0.3703  | 7.36E-14 | 4.08E-12 |
| QSOX2      | 9q34.3        | 0.370284 | 7.38E-14 | 4.08E-12 |
| GPR155     | 2q31.1        | -0.37012 | 7.57E-14 | 4.18E-12 |
| BDH2       | 4q24          | -0.36989 | 7.88E-14 | 4.34E-12 |
| SNHG12     | 1p35.3        | 0.36967  | 8.17E-14 | 4.48E-12 |
| SPC25      | 2q24.3        | 0.369473 | 8.44E-14 | 4.62E-12 |
| RNF180     | 5q12.3        | -0.36945 | 8.47E-14 | 4.62E-12 |
| AGAP5      | 10q22.2       | 0.369394 | 8.55E-14 | 4.65E-12 |
| EID1       | 15q21.1       | -0.36927 | 8.72E-14 | 4.73E-12 |
| CLN5       | 13q22.3       | -0.36908 | 9.00E-14 | 4.87E-12 |
| LEPROT     | 1p31.3        | -0.36897 | 9.17E-14 | 4.95E-12 |
| NALCN      | 13q32.3-q33.1 | -0.36884 | 9.36E-14 | 5.04E-12 |
| SNRPA      | 19q13.2       | 0.368378 | 1.01E-13 | 5.43E-12 |
| SFSWAP     | 12q24.33      | 0.367738 | 1.12E-13 | 6.01E-12 |
| PEX12      | 17q12         | -0.36736 | 1.20E-13 | 6.38E-12 |
| ASB16      | 17q21.31      | 0.367065 | 1.25E-13 | 6.68E-12 |
| ZNF169     | 9q22.32       | 0.366325 | 1.41E-13 | 7.52E-12 |
| ECT2       | 3q26.31       | 0.365776 | 1.55E-13 | 8.20E-12 |
| ARL8B      | 3p26.1        | -0.36548 | 1.62E-13 | 8.58E-12 |
| RTKN2      | 10q21.2       | 0.364662 | 1.86E-13 | 9.78E-12 |
| ATL1       | 14q22.1       | -0.36412 | 2.03E-13 | 1.07E-11 |
| URB2       | 1q42.13       | 0.363977 | 2.07E-13 | 1.09E-11 |
| ANKS6      | 9q22.33       | 0.363584 | 2.21E-13 | 1.16E-11 |
| UBAP2L     | 1q21.3        | 0.363475 | 2.25E-13 | 1.17E-11 |
| TMEM151B   | 6p21.1        | 0.363086 | 2.40E-13 | 1.25E-11 |
| C5ORF15    | 5q31.1        | -0.36237 | 2.69E-13 | 1.39E-11 |
| ARHGAP27P1 | 17q24.1       | 0.362219 | 2.75E-13 | 1.43E-11 |
| PDE1A      | 2q32.1        | -0.36199 | 2.86E-13 | 1.47E-11 |
| YIPF1      | 1p32.3        | -0.36197 | 2.87E-13 | 1.48E-11 |
| CDCA2      | 8p21.2        | 0.361931 | 2.89E-13 | 1.48E-11 |
| MCM2       | 3q21.3        | 0.361913 | 2.89E-13 | 1.48E-11 |
| STRIP2     | 7q32.1        | 0.361862 | 2.92E-13 | 1.49E-11 |
| TPX2       | 20q11.21      | 0.361805 | 2.94E-13 | 1.50E-11 |
| TMEM106B   | 7p21.3        | -0.36157 | 3.06E-13 | 1.55E-11 |
| PLPP3      | 1p32.2        | -0.36101 | 3.34E-13 | 1.69E-11 |
| ITIH3      | 3p21.1        | -0.36085 | 3.43E-13 | 1.73E-11 |
| SASS6      | 1p21.2        | 0.360836 | 3.44E-13 | 1.74E-11 |
| ALDH16A1   | 19q13.33      | 0.360527 | 3.62E-13 | 1.82E-11 |
| INPP5E     | 9q34.3        | 0.360429 | 3.67E-13 | 1.84E-11 |
| SERINC1    | 6q22.31       | -0.36027 | 3.77E-13 | 1.89E-11 |
| MGP        | 12p12.3       | -0.35991 | 3.99E-13 | 1.99E-11 |
| NUCKS1     | 1q32.1        | 0.359494 | 4.26E-13 | 2.12E-11 |
| EXOSC2     | 9q34.12       | 0.359314 | 4.39E-13 | 2.18E-11 |

|          |          |          |          |          |
|----------|----------|----------|----------|----------|
| RNPEP    | 1q32.1   | 0.359097 | 4.54E-13 | 2.25E-11 |
| GBA2     | 9p13.3   | 0.358715 | 4.83E-13 | 2.39E-11 |
| OSBPL7   | 17q21.32 | 0.358636 | 4.89E-13 | 2.41E-11 |
| ALDH1A3  | 15q26.3  | -0.35859 | 4.92E-13 | 2.42E-11 |
| GATAD2A  | 19p13.11 | 0.358354 | 5.11E-13 | 2.51E-11 |
| PRR11    | 17q22    | 0.358282 | 5.17E-13 | 2.53E-11 |
| SNHG3    | 1p35.3   | 0.358166 | 5.27E-13 | 2.57E-11 |
| TK1      | 17q25.3  | 0.358155 | 5.28E-13 | 2.57E-11 |
| RAB30    | 11q14.1  | -0.35801 | 5.40E-13 | 2.63E-11 |
| IPPK     | 9q22.31  | 0.357639 | 5.73E-13 | 2.78E-11 |
| SLC35A5  | 3q13.2   | -0.35732 | 6.02E-13 | 2.91E-11 |
| KBTBD3   | 11q22.3  | -0.35708 | 6.26E-13 | 3.02E-11 |
| KPNA2    | 17q24.2  | 0.357074 | 6.26E-13 | 3.02E-11 |
| BTD      | 3p25.1   | -0.35701 | 6.32E-13 | 3.04E-11 |
| LTB4R    | 14q12    | 0.356873 | 6.47E-13 | 3.10E-11 |
| GLE1     | 9q34.11  | 0.356735 | 6.61E-13 | 3.16E-11 |
| RHOT2    | 16p13.3  | 0.356497 | 6.86E-13 | 3.27E-11 |
| SUV39H1  | Xp11.23  | 0.356111 | 7.29E-13 | 3.47E-11 |
| TMEM201  | 1p36.22  | 0.355997 | 7.42E-13 | 3.52E-11 |
| SMG5     | 1q22     | 0.355867 | 7.58E-13 | 3.59E-11 |
| CCDC189  | 16p11.2  | 0.355403 | 8.15E-13 | 3.85E-11 |
| MCRIP1   | 17q25.3  | -0.35535 | 8.21E-13 | 3.87E-11 |
| TERT     | 5p15.33  | 0.355177 | 8.45E-13 | 3.97E-11 |
| SDF2     | 17q11.2  | -0.35513 | 8.52E-13 | 3.99E-11 |
| RAVER1   | 19p13.2  | 0.355119 | 8.52E-13 | 3.99E-11 |
| NCK1     | 3q22.3   | -0.35498 | 8.71E-13 | 4.07E-11 |
| WASH7P   | 1p36.33  | 0.354955 | 8.75E-13 | 4.07E-11 |
| TENM2    | 5q34     | -0.35487 | 8.87E-13 | 4.12E-11 |
| AZI2     | 3p24.1   | -0.35485 | 8.89E-13 | 4.12E-11 |
| CES1     | 16q12.2  | -0.35468 | 9.13E-13 | 4.22E-11 |
| MZF1     | 19q13.43 | 0.354532 | 9.35E-13 | 4.31E-11 |
| PRRC2A   | 6p21.33  | 0.354259 | 9.76E-13 | 4.49E-11 |
| FAM189B  | 1q22     | 0.354149 | 9.93E-13 | 4.56E-11 |
| RFWD3    | 16q23.1  | 0.354029 | 1.01E-12 | 4.63E-11 |
| PILRB    | 7q22.1   | 0.353974 | 1.02E-12 | 4.66E-11 |
| SMARCA4  | 19p13.2  | 0.353846 | 1.04E-12 | 4.75E-11 |
| HMGA1    | 6p21.31  | 0.353441 | 1.11E-12 | 5.05E-11 |
| SDC2     | 8q22.1   | -0.35338 | 1.12E-12 | 5.08E-11 |
| EPRS     | 1q41     | 0.353188 | 1.15E-12 | 5.23E-11 |
| PI4KAP1  | 22q11.21 | 0.353168 | 1.16E-12 | 5.23E-11 |
| BARD1    | 2q35     | 0.352869 | 1.21E-12 | 5.47E-11 |
| TRAM1    | 8q13.3   | -0.35286 | 1.21E-12 | 5.47E-11 |
| EDC4     | 16q22.1  | 0.352775 | 1.23E-12 | 5.52E-11 |
| NVL      | 1q42.11  | 0.352468 | 1.29E-12 | 5.78E-11 |
| XPO6     | 16p12.1  | 0.352362 | 1.31E-12 | 5.86E-11 |
| SSPN     | 12p12.1  | -0.35206 | 1.38E-12 | 6.14E-11 |
| CLUH     | 17p13.3  | 0.351784 | 1.44E-12 | 6.39E-11 |
| FBF1     | 17q25.1  | 0.351172 | 1.58E-12 | 7.01E-11 |
| MCM4     | 8q11.21  | 0.351099 | 1.60E-12 | 7.07E-11 |
| NCLN     | 19p13.3  | 0.351017 | 1.62E-12 | 7.13E-11 |
| CCDC78   | 16p13.3  | 0.351014 | 1.62E-12 | 7.13E-11 |
| SLC66A3  | 2p25.1   | -0.35015 | 1.85E-12 | 8.13E-11 |
| TES      | 7q31.2   | -0.3498  | 1.95E-12 | 8.57E-11 |
| BEND3    | 6q21     | 0.349305 | 2.11E-12 | 9.23E-11 |
| CMTM3    | 16q22.1  | -0.34927 | 2.12E-12 | 9.26E-11 |
| ATAD3A   | 1p36.33  | 0.349127 | 2.16E-12 | 9.44E-11 |
| TMEM47   | Xp21.1   | -0.34839 | 2.42E-12 | 1.06E-10 |
| LOH12CR2 | 12p13.2  | -0.34823 | 2.48E-12 | 1.08E-10 |

|           |                            |          |          |          |
|-----------|----------------------------|----------|----------|----------|
| COX7A1    | 19q13.12                   | -0.3482  | 2.50E-12 | 1.08E-10 |
| KNSTRN    | 15q15.1                    | 0.348172 | 2.51E-12 | 1.08E-10 |
| PRICKLE4  | 6p21.1                     | 0.347431 | 2.81E-12 | 1.21E-10 |
| GABARAP   | 17p13.1                    | -0.34711 | 2.95E-12 | 1.27E-10 |
| CNN3      | 1p21.3                     | -0.34709 | 2.96E-12 | 1.27E-10 |
| PLCXD1    | Xp22.33 and Yp11.32-p11.31 | 0.34701  | 2.99E-12 | 1.28E-10 |
| C4ORF3    | 4q26                       | -0.34698 | 3.01E-12 | 1.29E-10 |
| UCK2      | 1q24.1                     | 0.346835 | 3.07E-12 | 1.31E-10 |
| PKP3      | 11p15.5                    | 0.346453 | 3.26E-12 | 1.39E-10 |
| PLEKHA6   | 1q32.1                     | 0.346276 | 3.35E-12 | 1.42E-10 |
| CEP85     | 1p36.11                    | 0.346131 | 3.42E-12 | 1.45E-10 |
| PLEKHH1   | 14q24.1                    | 0.346045 | 3.47E-12 | 1.47E-10 |
| HOOK2     | 19p13.13                   | 0.345789 | 3.61E-12 | 1.52E-10 |
| HMMR      | 5q34                       | 0.345585 | 3.72E-12 | 1.57E-10 |
| PCYOX1    | 2p13.3                     | -0.34554 | 3.74E-12 | 1.58E-10 |
| ITGBL1    | 13q33.1                    | -0.34538 | 3.84E-12 | 1.61E-10 |
| TMEM59    | 1p32.3                     | -0.34537 | 3.84E-12 | 1.61E-10 |
| DCST2     | 1q21.3                     | 0.345245 | 3.92E-12 | 1.64E-10 |
| PIMREG    | 17p13.2                    | 0.345227 | 3.93E-12 | 1.64E-10 |
| SF3B4     | 1q21.2                     | 0.344918 | 4.12E-12 | 1.71E-10 |
| C1D       | 2p14                       | -0.34488 | 4.14E-12 | 1.72E-10 |
| OAZ2      | 15q22.31                   | -0.34462 | 4.31E-12 | 1.79E-10 |
| ZNF385B   | 2q31.2-q31.3               | -0.3442  | 4.59E-12 | 1.90E-10 |
| BMS1P4    | 10q22.2                    | 0.344183 | 4.60E-12 | 1.90E-10 |
| SAFB      | 19p13.3                    | 0.343956 | 4.76E-12 | 1.96E-10 |
| KRI1      | 19p13.2                    | 0.343931 | 4.78E-12 | 1.96E-10 |
| HELLS     | 10q23.33                   | 0.343659 | 4.98E-12 | 2.04E-10 |
| RAD51AP1  | 12p13.32                   | 0.34359  | 5.03E-12 | 2.06E-10 |
| ZFH4-AS1  | 8q21.13                    | -0.34352 | 5.08E-12 | 2.08E-10 |
| APBP2     | 17q23.2                    | -0.34328 | 5.27E-12 | 2.15E-10 |
| HNRNPU    | 1q44                       | 0.343277 | 5.27E-12 | 2.15E-10 |
| MAPK8IP3  | 16p13.3                    | 0.343197 | 5.34E-12 | 2.17E-10 |
| TRAF2     | 9q34.3                     | 0.343107 | 5.41E-12 | 2.19E-10 |
| CFAP44    | 3q13.2                     | 0.343052 | 5.45E-12 | 2.21E-10 |
| WDR76     | 15q15.3                    | 0.34294  | 5.55E-12 | 2.24E-10 |
| MIR100HG  | 11q24.1                    | -0.34278 | 5.68E-12 | 2.29E-10 |
| REXO5     | 16p12.3                    | 0.342345 | 6.07E-12 | 2.44E-10 |
| RERG      | 12p12.3                    | -0.34219 | 6.21E-12 | 2.49E-10 |
| PEX2      | 8q21.13                    | -0.34218 | 6.22E-12 | 2.49E-10 |
| UCKL1-AS1 | 20q13.33                   | 0.342013 | 6.38E-12 | 2.54E-10 |
| STAM2     | 2q23.3                     | -0.34201 | 6.38E-12 | 2.54E-10 |
| MDM4      | 1q32.1                     | 0.342001 | 6.39E-12 | 2.54E-10 |
| FXVD6     | 11q23.3                    | -0.34197 | 6.42E-12 | 2.55E-10 |
| PATL1     | 11q12.1                    | 0.341925 | 6.46E-12 | 2.56E-10 |
| PHLDA3    | 1q32.1                     | -0.34165 | 6.73E-12 | 2.66E-10 |
| CEP131    | 17q25.3                    | 0.341452 | 6.94E-12 | 2.74E-10 |
| MAP6      | 11q13.5                    | -0.34137 | 7.02E-12 | 2.77E-10 |
| LARP4B    | 10p15.3                    | 0.341102 | 7.31E-12 | 2.88E-10 |
| ITM2B     | 13q14.2                    | -0.34072 | 7.74E-12 | 3.04E-10 |
| CBX5      | 12q13.13                   | 0.340685 | 7.78E-12 | 3.05E-10 |
| KIFC2     | 8q24.3                     | 0.340629 | 7.84E-12 | 3.07E-10 |
| IGFBP3    | 7p12.3                     | -0.34059 | 7.89E-12 | 3.08E-10 |
| PRR22     | 19p13.3                    | 0.340534 | 7.96E-12 | 3.10E-10 |
| CNTN4     | 3p26.3-p26.2               | -0.34053 | 7.96E-12 | 3.10E-10 |
| GAS8-AS1  | 16q24.3                    | 0.340495 | 8.00E-12 | 3.11E-10 |
| ASMTL-AS1 | Xp22.33 and Yp11.2         | 0.340466 | 8.04E-12 | 3.11E-10 |
| MCM5      | 22q12.3                    | 0.339896 | 8.75E-12 | 3.38E-10 |
| LMBRD1    | 6q13                       | -0.33974 | 8.95E-12 | 3.45E-10 |



|              |          |          |          |          |
|--------------|----------|----------|----------|----------|
| MICU3        | 8p22     | -0.33936 | 9.48E-12 | 3.65E-10 |
| SPACA4       | 19q13.33 | 0.339273 | 9.60E-12 | 3.69E-10 |
| GTDC1        | 2q22.3   | -0.33927 | 9.61E-12 | 3.69E-10 |
| BBS9         | 7p14.3   | -0.33925 | 9.63E-12 | 3.69E-10 |
| TCHP         | 12q24.11 | 0.33917  | 9.75E-12 | 3.72E-10 |
| SNORA8       | 11q21    | 0.339148 | 9.78E-12 | 3.73E-10 |
| CDK16        | Xp11.3   | 0.33912  | 9.82E-12 | 3.74E-10 |
| DLEU2        | 13q14.2  | 0.339025 | 9.96E-12 | 3.78E-10 |
| FHOD1        | 16q22.1  | 0.33898  | 1.00E-11 | 3.80E-10 |
| CHKB-CPT1B   | 22q13.33 | 0.338692 | 1.05E-11 | 3.96E-10 |
| LARP6        | 15q23    | -0.33851 | 1.07E-11 | 4.06E-10 |
| ANP32E       | 1q21.2   | 0.338342 | 1.10E-11 | 4.15E-10 |
| RNF126       | 19p13.3  | 0.338334 | 1.10E-11 | 4.15E-10 |
| CDC37        | 19p13.2  | 0.338252 | 1.12E-11 | 4.20E-10 |
| ZNF318       | 6p21.1   | 0.337813 | 1.19E-11 | 4.47E-10 |
| SRSF1        | 17q22    | 0.337768 | 1.20E-11 | 4.49E-10 |
| DHX9         | 1q25.3   | 0.337683 | 1.21E-11 | 4.54E-10 |
| ARL15        | 5q11.2   | -0.33741 | 1.26E-11 | 4.71E-10 |
| RFC5         | 12q24.23 | 0.337353 | 1.28E-11 | 4.75E-10 |
| AGAP7P       | 10q11.22 | 0.336683 | 1.41E-11 | 5.22E-10 |
| PYCR2        | 1q42.12  | 0.33668  | 1.41E-11 | 5.22E-10 |
| KMT5A        | 12q24.31 | 0.336661 | 1.41E-11 | 5.23E-10 |
| PCLAF        | 15q22.31 | 0.336594 | 1.43E-11 | 5.27E-10 |
| ITGAV        | 2q32.1   | -0.33653 | 1.44E-11 | 5.31E-10 |
| LY96         | 8q21.11  | -0.33649 | 1.45E-11 | 5.33E-10 |
| SDHAP1       | 3q29     | 0.336212 | 1.51E-11 | 5.54E-10 |
| SUGCT        | 7p14.1   | -0.336   | 1.56E-11 | 5.71E-10 |
| MPPED2       | 11p14.1  | -0.33599 | 1.56E-11 | 5.71E-10 |
| LOC100190986 | 16p12.2  | 0.335926 | 1.57E-11 | 5.75E-10 |
| MPP3         | 17q21.31 | 0.335786 | 1.61E-11 | 5.86E-10 |
| ELMOD2       | 4q31.1   | -0.33568 | 1.63E-11 | 5.94E-10 |
| SGO2         | 2q33.1   | 0.335534 | 1.67E-11 | 6.06E-10 |
| ADGRL1       | 19p13.12 | 0.335512 | 1.67E-11 | 6.06E-10 |
| KLF16        | 19p13.3  | 0.335262 | 1.73E-11 | 6.28E-10 |
| RAP1A        | 1p13.2   | -0.33502 | 1.80E-11 | 6.50E-10 |
| PAN2         | 12q13.3  | 0.334891 | 1.83E-11 | 6.61E-10 |
| NAP1L3       | Xq21.32  | -0.33484 | 1.84E-11 | 6.64E-10 |
| FGF1         | 5q31.3   | -0.33478 | 1.86E-11 | 6.69E-10 |
| PDGFD        | 11q22.3  | -0.33472 | 1.88E-11 | 6.74E-10 |
| WDR5         | 9q34.2   | 0.334709 | 1.88E-11 | 6.74E-10 |
| NPHP4        | 1p36.31  | 0.334521 | 1.93E-11 | 6.91E-10 |
| PLN          | 6q22.31  | -0.33424 | 2.01E-11 | 7.19E-10 |
| SLC6A7       | 5q32     | 0.333995 | 2.09E-11 | 7.44E-10 |
| CERS5        | 12q13.12 | -0.33361 | 2.21E-11 | 7.85E-10 |
| LBR          | 1q42.12  | 0.333538 | 2.23E-11 | 7.92E-10 |
| TM2D1        | 1p31.3   | -0.33343 | 2.27E-11 | 8.03E-10 |
| GLRB         | 4q32.1   | -0.33341 | 2.27E-11 | 8.04E-10 |
| TUBA1B       | 12q13.12 | 0.333358 | 2.29E-11 | 8.09E-10 |
| HOPX         | 4q12     | -0.33307 | 2.39E-11 | 8.41E-10 |
| GPX7         | 1p32.3   | -0.33301 | 2.41E-11 | 8.48E-10 |
| CDK5RAP2     | 9q33.2   | 0.332978 | 2.42E-11 | 8.50E-10 |
| IGHMBP2      | 11q13.3  | 0.332956 | 2.43E-11 | 8.51E-10 |
| ARHGAP19     | 10q24.1  | 0.332926 | 2.44E-11 | 8.53E-10 |
| CYBRD1       | 2q31.1   | -0.33288 | 2.45E-11 | 8.57E-10 |
| NECAB1       | 8q21.3   | -0.33277 | 2.49E-11 | 8.70E-10 |
| TOP3B        | 22q11.22 | 0.332604 | 2.55E-11 | 8.90E-10 |
| PDGFC        | 4q32.1   | -0.33257 | 2.57E-11 | 8.92E-10 |
| PWWP3B       | Xq22.3   | -0.33244 | 2.61E-11 | 9.07E-10 |

|             |                    |          |          |          |
|-------------|--------------------|----------|----------|----------|
| C2CD2L      | 11q23.3            | 0.332328 | 2.66E-11 | 9.21E-10 |
| MOXD1       | 6q23.2             | -0.3323  | 2.67E-11 | 9.22E-10 |
| TRIM14      | 9q22.33            | 0.332297 | 2.67E-11 | 9.22E-10 |
| TOMM40      | 19q13.32           | 0.332278 | 2.68E-11 | 9.23E-10 |
| OIP5        | 15q15.1            | 0.332263 | 2.68E-11 | 9.23E-10 |
| TNFSF12     | 17p13.1            | -0.33198 | 2.80E-11 | 9.61E-10 |
| EWSR1       | 22q12.2            | 0.331749 | 2.89E-11 | 9.91E-10 |
| KLHDC1      | 14q21.3            | -0.33143 | 3.03E-11 | 1.04E-09 |
| TLCD5       | 11q23.3            | -0.33142 | 3.03E-11 | 1.04E-09 |
| PLCB3       | 11q13.1            | 0.331399 | 3.04E-11 | 1.04E-09 |
| ELAVL1      | 19p13.2            | 0.331075 | 3.19E-11 | 1.09E-09 |
| SEC16A      | 9q34.3             | 0.330929 | 3.25E-11 | 1.11E-09 |
| GINS3       | 16q21              | 0.330789 | 3.32E-11 | 1.13E-09 |
| MICALL2     | 7p22.3             | 0.330621 | 3.40E-11 | 1.15E-09 |
| RFC4        | 3q27.3             | 0.330583 | 3.42E-11 | 1.16E-09 |
| AKR7L       | 1p36.13 1p35-p36.1 | 0.330544 | 3.44E-11 | 1.16E-09 |
| LRRC45      | 17q25.3            | 0.330445 | 3.49E-11 | 1.18E-09 |
| FH          | 1q43               | 0.33039  | 3.52E-11 | 1.18E-09 |
| FAM114A2    | 5q33.2             | -0.33036 | 3.53E-11 | 1.19E-09 |
| GMPS        | 3q25.31            | 0.330206 | 3.61E-11 | 1.21E-09 |
| GABARAPL2   | 16q23.1            | -0.32973 | 3.86E-11 | 1.29E-09 |
| DCLK1       | 13q13.3            | -0.32964 | 3.92E-11 | 1.31E-09 |
| SAMD1       | 19p13.12           | 0.329619 | 3.93E-11 | 1.31E-09 |
| FBXO3       | 11p13              | -0.3296  | 3.94E-11 | 1.31E-09 |
| CENPM       | 22q13.2            | 0.329564 | 3.96E-11 | 1.32E-09 |
| TSPAN31     | 12q14.1            | -0.32948 | 4.01E-11 | 1.33E-09 |
| RCAN2       | 6p12.3             | -0.32947 | 4.01E-11 | 1.33E-09 |
| CCDC32      | 15q15.1            | -0.32939 | 4.06E-11 | 1.34E-09 |
| TMEM259     | 19p13.3            | 0.329178 | 4.18E-11 | 1.38E-09 |
| LRCH2       | Xq23               | -0.32914 | 4.20E-11 | 1.39E-09 |
| LINC00115   | 1p36.33            | 0.329138 | 4.21E-11 | 1.39E-09 |
| DDX51       | 12q24.33           | 0.329112 | 4.22E-11 | 1.39E-09 |
| BIRC2       | 11q22.2            | -0.32901 | 4.29E-11 | 1.41E-09 |
| BIRC5       | 17q25.3            | 0.328976 | 4.31E-11 | 1.41E-09 |
| D2HGDH      | 2q37.3             | 0.328732 | 4.46E-11 | 1.46E-09 |
| CDK5RAP3    | 17q21.32           | 0.328565 | 4.57E-11 | 1.49E-09 |
| DNAJC11     | 1p36.31            | 0.328547 | 4.58E-11 | 1.49E-09 |
| CSNK1G2-AS1 | 19p13.3            | 0.328392 | 4.68E-11 | 1.52E-09 |
| ZNF626      | 19p12              | -0.32828 | 4.76E-11 | 1.55E-09 |
| ADAT2       | 6q24.2             | 0.328275 | 4.76E-11 | 1.55E-09 |
| OCLM        | 1q31.1             | 0.328195 | 4.82E-11 | 1.56E-09 |
| CADM1       | 11q23.3            | -0.32814 | 4.85E-11 | 1.57E-09 |
| NUDT10      | Xp11.22            | -0.32806 | 4.91E-11 | 1.58E-09 |
| ARL6IP5     | 3p14.1             | -0.32794 | 5.00E-11 | 1.61E-09 |
| DNAJB4      | 1p31.1             | -0.32792 | 5.01E-11 | 1.61E-09 |
| HNMT        | 2q22.1             | -0.32785 | 5.06E-11 | 1.63E-09 |
| PRKN        | 6q26               | -0.32783 | 5.07E-11 | 1.63E-09 |
| WBP1        | 2p13.1             | -0.32783 | 5.08E-11 | 1.63E-09 |
| SFRP4       | 7p14.1             | -0.32772 | 5.15E-11 | 1.65E-09 |
| LDLRAD4     | 18p11.21           | -0.32729 | 5.47E-11 | 1.75E-09 |
| TAF5L       | 1q42.13            | 0.327263 | 5.50E-11 | 1.75E-09 |
| TAF1C       | 16q24.1            | 0.327252 | 5.51E-11 | 1.75E-09 |
| DSE         | 6q22.1             | -0.32718 | 5.56E-11 | 1.77E-09 |
| KATNB1      | 16q21              | 0.327078 | 5.65E-11 | 1.79E-09 |
| RDH13       | 19q13.42           | 0.327001 | 5.71E-11 | 1.81E-09 |
| CROCCP2     | 1p36.13            | 0.326887 | 5.80E-11 | 1.84E-09 |
| RECK        | 9p13.3             | -0.32679 | 5.88E-11 | 1.86E-09 |
| MCM7        | 7q22.1             | 0.326615 | 6.03E-11 | 1.90E-09 |

|                 |          |          |          |          |
|-----------------|----------|----------|----------|----------|
| GUSBP11         | 22q11.23 | 0.326608 | 6.04E-11 | 1.90E-09 |
| SUZ12P1         | 17q11.2  | 0.326596 | 6.05E-11 | 1.90E-09 |
| PDXDC2P-NPIP14P | 16q22.1  | 0.32651  | 6.12E-11 | 1.92E-09 |
| MXRA7           | 17q25.1  | -0.32639 | 6.23E-11 | 1.95E-09 |
| PBXIP1          | 1q21.3   | -0.32613 | 6.45E-11 | 2.02E-09 |
| FANCB           | Xp22.2   | 0.325971 | 6.61E-11 | 2.06E-09 |
| KIF21B          | 1q32.1   | 0.325803 | 6.76E-11 | 2.11E-09 |
| DCN             | 12q21.33 | -0.32579 | 6.78E-11 | 2.11E-09 |
| CCNO            | 5q11.2   | 0.325706 | 6.86E-11 | 2.13E-09 |
| DPYSL3          | 5q32     | -0.32562 | 6.94E-11 | 2.15E-09 |
| PARP1           | 1q42.12  | 0.325494 | 7.07E-11 | 2.19E-09 |
| AKAP8           | 19p13.12 | 0.325476 | 7.08E-11 | 2.19E-09 |
| H2AFX           | 11q23.3  | 0.325402 | 7.16E-11 | 2.21E-09 |
| CREBL2          | 12p13.1  | -0.32527 | 7.30E-11 | 2.25E-09 |
| PNPLA8          | 7q31.1   | -0.32525 | 7.32E-11 | 2.25E-09 |
| AGER            | 6p21.32  | 0.32523  | 7.33E-11 | 2.26E-09 |
| CLN6            | 15q23    | 0.324911 | 7.67E-11 | 2.36E-09 |
| DEPDC1          | 1p31.3   | 0.324785 | 7.81E-11 | 2.40E-09 |
| C2ORF42         | 2p13.3   | -0.32456 | 8.06E-11 | 2.47E-09 |
| NBEAL2          | 3p21.31  | 0.324502 | 8.13E-11 | 2.48E-09 |
| CPED1           | 7q31.31  | -0.32448 | 8.15E-11 | 2.49E-09 |
| ANAPC2          | 9q34.3   | 0.324366 | 8.28E-11 | 2.53E-09 |
| BMS1            | 10q11.21 | 0.324234 | 8.44E-11 | 2.57E-09 |
| GPI             | 19q13.11 | 0.324215 | 8.46E-11 | 2.57E-09 |
| TMEM130         | 7q22.1   | -0.32399 | 8.74E-11 | 2.65E-09 |
| ZNF519          | 18p11.21 | 0.323893 | 8.85E-11 | 2.68E-09 |
| DHRS7           | 14q23.1  | -0.32382 | 8.95E-11 | 2.71E-09 |
| ANGPT1          | 8q23.1   | -0.32375 | 9.04E-11 | 2.73E-09 |
| EDIL3           | 5q14.3   | -0.32352 | 9.33E-11 | 2.81E-09 |
| FBXL5           | 4p15.32  | -0.32337 | 9.53E-11 | 2.87E-09 |
| FIGNL1          | 7p12.2   | 0.323302 | 9.62E-11 | 2.89E-09 |
| PSAP            | 10q22.1  | -0.3231  | 9.90E-11 | 2.97E-09 |
| EP400P1         | 12q24.33 | 0.32309  | 9.91E-11 | 2.97E-09 |
| ANKRD36B        | 2q11.2   | 0.322777 | 1.04E-10 | 3.10E-09 |
| CLIC4           | 1p36.11  | -0.32253 | 1.07E-10 | 3.20E-09 |
| ASPN            | 9q22.31  | -0.32239 | 1.09E-10 | 3.26E-09 |
| SAFB2           | 19p13.3  | 0.322329 | 1.10E-10 | 3.28E-09 |
| INTS7           | 1q32.3   | 0.322287 | 1.11E-10 | 3.30E-09 |
| CNOT3           | 19q13.42 | 0.322234 | 1.12E-10 | 3.32E-09 |
| UBE2C           | 20q13.12 | 0.321669 | 1.21E-10 | 3.59E-09 |
| CHIC2           | 4q12     | -0.32157 | 1.22E-10 | 3.63E-09 |
| REXO1           | 19p13.3  | 0.321365 | 1.26E-10 | 3.72E-09 |
| CIR1            | 2q31.1   | -0.32136 | 1.26E-10 | 3.72E-09 |
| AOX1            | 2q33.1   | -0.32125 | 1.28E-10 | 3.78E-09 |
| RASL11B         | 4q12     | -0.32119 | 1.29E-10 | 3.81E-09 |
| PSMC3IP         | 17q21.2  | 0.321085 | 1.31E-10 | 3.85E-09 |
| TNFSF11         | 13q14.11 | -0.32107 | 1.31E-10 | 3.85E-09 |
| NOC4L           | 12q24.33 | 0.321055 | 1.32E-10 | 3.86E-09 |
| LAD1            | 1q32.1   | 0.321003 | 1.33E-10 | 3.88E-09 |
| CARD14          | 17q25.3  | 0.320488 | 1.42E-10 | 4.16E-09 |
| OMD             | 9q22.31  | -0.32031 | 1.46E-10 | 4.26E-09 |
| SLC29A2         | 11q13.2  | 0.320281 | 1.47E-10 | 4.27E-09 |
| SPRN            | 10q26.3  | 0.320231 | 1.48E-10 | 4.30E-09 |
| CCNL2           | 1p36.33  | 0.320004 | 1.52E-10 | 4.43E-09 |
| C11ORF58        | 11p15.2  | -0.31976 | 1.58E-10 | 4.57E-09 |
| LHX4            | 1q25.2   | 0.319757 | 1.58E-10 | 4.57E-09 |
| AURKAP1         | 1q41     | 0.319744 | 1.58E-10 | 4.57E-09 |
| TSSK3           | 1p35.1   | 0.319715 | 1.58E-10 | 4.58E-09 |

|           |          |          |          |          |
|-----------|----------|----------|----------|----------|
| PCDHB3    | 5q31.3   | -0.31943 | 1.65E-10 | 4.76E-09 |
| FAM171B   | 2q32.1   | -0.31933 | 1.67E-10 | 4.82E-09 |
| LOC220729 | 3q29     | 0.319306 | 1.68E-10 | 4.82E-09 |
| MYLK      | 3q21.1   | -0.3193  | 1.68E-10 | 4.82E-09 |
| CCPG1     | 15q21.3  | -0.31922 | 1.70E-10 | 4.87E-09 |
| IQCE      | 7p22.3   | 0.319184 | 1.71E-10 | 4.89E-09 |
| ANKMY1    | 2q37.3   | 0.318977 | 1.76E-10 | 5.02E-09 |
| EHMT2     | 6p21.33  | 0.318528 | 1.87E-10 | 5.33E-09 |
| GASK1A    | 3p22.1   | -0.3185  | 1.88E-10 | 5.35E-09 |
| ADGRD1    | 12q24.33 | -0.31843 | 1.89E-10 | 5.39E-09 |
| DNASE1L2  | 16p13.3  | 0.318332 | 1.92E-10 | 5.46E-09 |
| HIP1R     | 12q24.31 | 0.31832  | 1.92E-10 | 5.46E-09 |
| ATP6V1E1  | 22q11.21 | -0.31828 | 1.93E-10 | 5.48E-09 |
| C19ORF71  | 19p13.3  | 0.318118 | 1.98E-10 | 5.60E-09 |
| ZNF276    | 16q24.3  | 0.317934 | 2.03E-10 | 5.73E-09 |
| CHEK1     | 11q24.2  | 0.317829 | 2.06E-10 | 5.80E-09 |
| ESCO2     | 8p21.1   | 0.317823 | 2.06E-10 | 5.80E-09 |
| INE1      | Xp11.3   | 0.317809 | 2.06E-10 | 5.80E-09 |
| C1S       | 12p13.31 | -0.31781 | 2.06E-10 | 5.80E-09 |
| LAYN      | 11q23.1  | -0.3178  | 2.06E-10 | 5.80E-09 |
| PABPC5    | Xq21.31  | -0.31766 | 2.10E-10 | 5.90E-09 |
| FAM89B    | 11q13.1  | -0.31761 | 2.12E-10 | 5.93E-09 |
| TPR       | 1q31.1   | 0.31753  | 2.14E-10 | 5.99E-09 |
| HNRNPM    | 19p13.2  | 0.317473 | 2.16E-10 | 6.03E-09 |
| ZNF687    | 1q21.3   | 0.317392 | 2.18E-10 | 6.09E-09 |
| LIFR      | 5p13.1   | -0.31738 | 2.19E-10 | 6.09E-09 |
| GUCY1B1   | 4q32.1   | -0.31716 | 2.25E-10 | 6.27E-09 |
| HNRNPAB   | 5q35.3   | 0.316994 | 2.30E-10 | 6.40E-09 |
| LTBP1     | 2p22.3   | -0.31694 | 2.32E-10 | 6.43E-09 |
| FUS       | 16p11.2  | 0.31694  | 2.32E-10 | 6.43E-09 |
| PRELP     | 1q32.1   | -0.31692 | 2.33E-10 | 6.44E-09 |
| AMIGO3    | 3p21.31  | 0.316755 | 2.38E-10 | 6.58E-09 |
| RAB34     | 17q11.2  | -0.31674 | 2.39E-10 | 6.58E-09 |
| EFEMP1    | 2p16.1   | -0.31673 | 2.39E-10 | 6.58E-09 |
| TANK      | 2q24.2   | -0.31654 | 2.45E-10 | 6.74E-09 |
| ASH1L-AS1 | 1q22     | 0.31629  | 2.54E-10 | 6.97E-09 |
| NOL12     | 22q13.1  | 0.31625  | 2.55E-10 | 7.00E-09 |
| GNG11     | 7q21.3   | -0.31618 | 2.58E-10 | 7.06E-09 |
| PDLIM3    | 4q35.1   | -0.3159  | 2.68E-10 | 7.32E-09 |
| KCNQ5     | 6q13     | -0.31588 | 2.68E-10 | 7.33E-09 |
| BBS12     | 4q27     | -0.31584 | 2.70E-10 | 7.36E-09 |
| NEGR1     | 1p31.1   | -0.31581 | 2.71E-10 | 7.38E-09 |
| TMEM127   | 2q11.2   | -0.31572 | 2.74E-10 | 7.46E-09 |
| CASP2     | 7q34     | 0.315614 | 2.78E-10 | 7.56E-09 |
| CUL9      | 6p21.1   | 0.315569 | 2.80E-10 | 7.60E-09 |
| ENPP2     | 8q24.12  | -0.31554 | 2.81E-10 | 7.62E-09 |
| USP31     | 16p12.2  | 0.315513 | 2.82E-10 | 7.64E-09 |
| SDHAP2    | 3q29     | 0.315439 | 2.85E-10 | 7.70E-09 |
| KCTD3     | 1q41     | 0.315417 | 2.86E-10 | 7.72E-09 |
| ZCRB1     | 12q12    | -0.31521 | 2.94E-10 | 7.92E-09 |
| USP21     | 1q23.3   | 0.315196 | 2.95E-10 | 7.93E-09 |
| SLC9A5    | 16q22.1  | 0.31507  | 3.00E-10 | 8.06E-09 |
| RORA      | 15q22.2  | -0.31491 | 3.06E-10 | 8.23E-09 |
| AURKA     | 20q13.2  | 0.314863 | 3.08E-10 | 8.26E-09 |
| PKIG      | 20q13.12 | -0.31483 | 3.10E-10 | 8.29E-09 |
| KIF4B     | 5q33.2   | 0.314774 | 3.12E-10 | 8.34E-09 |
| TRIM41    | 5q35.3   | 0.314655 | 3.17E-10 | 8.47E-09 |
| SMIM10    | Xq26.3   | -0.31462 | 3.18E-10 | 8.49E-09 |

|           |              |          |          |          |
|-----------|--------------|----------|----------|----------|
| PUS1      | 12q24.33     | 0.314538 | 3.22E-10 | 8.58E-09 |
| CLUHP3    | 16p11.2      | 0.314488 | 3.24E-10 | 8.63E-09 |
| CHST14    | 15q15.1      | -0.31446 | 3.26E-10 | 8.65E-09 |
| SNORA7B   | 3q21.3       | 0.314326 | 3.32E-10 | 8.79E-09 |
| PABPC4L   | 4q28.3       | -0.3143  | 3.32E-10 | 8.81E-09 |
| NPIP5     | 16p12.2      | 0.314096 | 3.42E-10 | 9.05E-09 |
| DEPP1     | 10q11.21     | -0.31401 | 3.46E-10 | 9.14E-09 |
| CCDC14    | 3q21.1       | 0.313973 | 3.48E-10 | 9.18E-09 |
| FBXO5     | 6q25.2       | 0.313857 | 3.53E-10 | 9.31E-09 |
| PAXX      | 9q34.3       | 0.313694 | 3.61E-10 | 9.50E-09 |
| RBM43     | 2q23.3       | -0.31353 | 3.69E-10 | 9.68E-09 |
| CTBS      | 1p22.3       | -0.31353 | 3.69E-10 | 9.68E-09 |
| PFAS      | 17p13.1      | 0.313526 | 3.69E-10 | 9.68E-09 |
| ZDHHC15   | Xq13.3       | -0.31342 | 3.75E-10 | 9.80E-09 |
| SH3BP2    | 4p16.3       | 0.31342  | 3.75E-10 | 9.80E-09 |
| SHISA4    | 1q32.1       | -0.31336 | 3.78E-10 | 9.86E-09 |
| BBS10     | 12q21.2      | -0.31332 | 3.80E-10 | 9.90E-09 |
| SPDYE1    | 7p13         | 0.313303 | 3.81E-10 | 9.92E-09 |
| RAD9A     | 11q13.2      | 0.313237 | 3.84E-10 | 9.99E-09 |
| SCARB2    | 4q21.1       | -0.3132  | 3.86E-10 | 1.00E-08 |
| ZNF287    | 17p11.2      | -0.31314 | 3.89E-10 | 1.01E-08 |
| CLU       | 8p21.1       | -0.31314 | 3.89E-10 | 1.01E-08 |
| VAMP5     | 2p11.2       | -0.31311 | 3.91E-10 | 1.01E-08 |
| KLHL4     | Xq21.31      | -0.31299 | 3.97E-10 | 1.03E-08 |
| ZKSCAN7   | 3p21.31      | -0.31287 | 4.04E-10 | 1.04E-08 |
| RNASE6    | 14q11.2      | -0.31278 | 4.09E-10 | 1.05E-08 |
| LSS       | 21q22.3      | 0.312703 | 4.13E-10 | 1.06E-08 |
| TMEM100   | 17q22        | -0.31267 | 4.14E-10 | 1.06E-08 |
| GULP1     | 2q32.1-q32.2 | -0.31267 | 4.15E-10 | 1.06E-08 |
| CENPK     | 5q12.3       | 0.312636 | 4.17E-10 | 1.07E-08 |
| PPP1CB    | 2p23.2       | -0.31262 | 4.18E-10 | 1.07E-08 |
| AGA       | 4q34.3       | -0.31261 | 4.18E-10 | 1.07E-08 |
| ANGPTL1   | 1q25.2       | -0.3126  | 4.19E-10 | 1.07E-08 |
| B3GNT2    | 2p15         | -0.31256 | 4.21E-10 | 1.07E-08 |
| LINC01000 | 7q32.1       | 0.312365 | 4.32E-10 | 1.10E-08 |
| PLSCR4    | 3q24         | -0.31232 | 4.35E-10 | 1.11E-08 |
| HSPA13    | 21q11.2      | -0.31227 | 4.38E-10 | 1.11E-08 |
| RGCC      | 13q14.11     | -0.31223 | 4.40E-10 | 1.12E-08 |
| RRP12     | 10q24.1      | 0.312202 | 4.42E-10 | 1.12E-08 |
| SUV39H2   | 10p13        | 0.311917 | 4.59E-10 | 1.16E-08 |
| SLC45A1   | 1p36.23      | -0.3119  | 4.60E-10 | 1.16E-08 |
| JAM2      | 21q21.3      | -0.31172 | 4.71E-10 | 1.19E-08 |
| CRISPLD1  | 8q21.13      | -0.31169 | 4.73E-10 | 1.19E-08 |
| RBMS1     | 2q24.2       | -0.31168 | 4.74E-10 | 1.19E-08 |
| CRYAB     | 11q23.1      | -0.31166 | 4.75E-10 | 1.19E-08 |
| ABRAXAS1  | 4q21.23      | -0.31149 | 4.86E-10 | 1.22E-08 |
| ID4       | 6p22.3       | -0.31117 | 5.07E-10 | 1.27E-08 |
| ECRG4     | 2q12.2       | -0.31115 | 5.09E-10 | 1.28E-08 |
| DPT       | 1q24.2       | -0.31109 | 5.13E-10 | 1.28E-08 |
| TYMS      | 18p11.32     | 0.310971 | 5.21E-10 | 1.30E-08 |
| TP53INP1  | 8q22.1       | -0.31087 | 5.28E-10 | 1.32E-08 |
| NREP      | 5q22.1       | -0.31086 | 5.29E-10 | 1.32E-08 |
| MAP1LC3B  | 16q24.2      | -0.31078 | 5.34E-10 | 1.33E-08 |
| ADH5      | 4q23         | -0.31078 | 5.34E-10 | 1.33E-08 |
| ZNF826P   | 19p12        | -0.31068 | 5.42E-10 | 1.35E-08 |
| ATP2A1    | 16p11.2      | 0.310577 | 5.49E-10 | 1.36E-08 |
| CDKN3     | 14q22.2      | 0.310481 | 5.56E-10 | 1.38E-08 |
| NFYC-AS1  | 1p34.2       | 0.310466 | 5.57E-10 | 1.38E-08 |

|              |               |          |          |          |
|--------------|---------------|----------|----------|----------|
| GPC6         | 13q31.3-q32.1 | -0.3104  | 5.62E-10 | 1.39E-08 |
| C11ORF74     | 11p12         | -0.31038 | 5.64E-10 | 1.39E-08 |
| PKN3         | 9q34.11       | 0.310349 | 5.66E-10 | 1.40E-08 |
| EPHA3        | 3p11.1        | -0.31033 | 5.67E-10 | 1.40E-08 |
| FANCE        | 6p21.31       | 0.310298 | 5.70E-10 | 1.40E-08 |
| DARS2        | 1q25.1        | 0.310279 | 5.71E-10 | 1.40E-08 |
| NATD1        | 17p11.2       | -0.3102  | 5.77E-10 | 1.42E-08 |
| STRA6        | 15q24.1       | -0.31004 | 5.90E-10 | 1.45E-08 |
| CCNE2        | 8q22.1        | 0.309998 | 5.93E-10 | 1.45E-08 |
| OSTM1        | 6q21          | -0.30999 | 5.94E-10 | 1.45E-08 |
| TMOD4        | 1q21.3        | 0.309935 | 5.98E-10 | 1.46E-08 |
| RMI2         | 16p13.13      | 0.309913 | 6.00E-10 | 1.46E-08 |
| LOC100133331 | 1p36.33       | 0.309858 | 6.04E-10 | 1.47E-08 |
| HCG27        | 6p21.33       | 0.309847 | 6.05E-10 | 1.47E-08 |
| YOD1         | 1q32.1        | 0.309806 | 6.09E-10 | 1.48E-08 |
| ATR          | 3q23          | 0.309691 | 6.18E-10 | 1.50E-08 |
| PPP1R2       | 3q29          | -0.30957 | 6.28E-10 | 1.52E-08 |
| SNHG1        | 11q12.3       | 0.30951  | 6.33E-10 | 1.53E-08 |
| PPARGC1B     | 5q32          | 0.30941  | 6.42E-10 | 1.55E-08 |
| LOC155060    | 7q36.1        | 0.309396 | 6.43E-10 | 1.55E-08 |
| CRY2         | 11p11.2       | -0.30938 | 6.44E-10 | 1.55E-08 |
| DOK5         | 20q13.2       | -0.30934 | 6.47E-10 | 1.56E-08 |
| PRKG2        | 4q21.21       | -0.30926 | 6.55E-10 | 1.58E-08 |
| MFGE8        | 15q26.1       | -0.30923 | 6.57E-10 | 1.58E-08 |
| NUP107       | 12q15         | 0.309162 | 6.63E-10 | 1.59E-08 |
| PLA2G5       | 1p36.13       | -0.30914 | 6.65E-10 | 1.59E-08 |
| BRI3BP       | 12q24.31      | 0.309109 | 6.68E-10 | 1.60E-08 |
| FRZB         | 2q32.1        | -0.30893 | 6.84E-10 | 1.64E-08 |
| TNFSF4       | 1q25.1        | -0.30878 | 6.98E-10 | 1.67E-08 |
| FEZ1         | 11q24.2       | -0.30874 | 7.02E-10 | 1.67E-08 |
| LONP1        | 19p13.3       | 0.308696 | 7.06E-10 | 1.68E-08 |
| FAXDC2       | 5q33.2        | -0.30869 | 7.06E-10 | 1.68E-08 |
| C6ORF136     | 6p21.33       | 0.308663 | 7.09E-10 | 1.69E-08 |
| RBM10        | Xp11.3        | 0.3086   | 7.15E-10 | 1.70E-08 |
| ANO4         | 12q23.1       | -0.30857 | 7.17E-10 | 1.70E-08 |
| FSTL1        | 3q13.33       | -0.30854 | 7.20E-10 | 1.71E-08 |
| ATXN2L       | 16p11.2       | 0.308428 | 7.31E-10 | 1.73E-08 |
| UBE2W        | 8q21.11       | -0.30831 | 7.43E-10 | 1.76E-08 |
| MTBP         | 8q24.12       | 0.308304 | 7.43E-10 | 1.76E-08 |
| SNHG4        | 5q31.2        | 0.308235 | 7.50E-10 | 1.77E-08 |
| NUP205       | 7q33          | 0.308212 | 7.52E-10 | 1.77E-08 |
| STX8         | 17p13.1       | -0.30815 | 7.59E-10 | 1.79E-08 |
| LINC00896    | 22q11.21      | 0.30811  | 7.63E-10 | 1.79E-08 |
| FZR1         | 19p13.3       | 0.308086 | 7.65E-10 | 1.80E-08 |
| NNMT         | 11q23.2       | -0.30807 | 7.67E-10 | 1.80E-08 |
| MYL9         | 20q11.23      | -0.30798 | 7.76E-10 | 1.82E-08 |
| ATP6V0E1     | 5q35.1        | -0.30795 | 7.79E-10 | 1.82E-08 |
| EMCN         | 4q24          | -0.30791 | 7.83E-10 | 1.83E-08 |
| EFNB3        | 17p13.1       | -0.30788 | 7.86E-10 | 1.84E-08 |
| C5ORF34      | 5p12          | 0.307802 | 7.94E-10 | 1.85E-08 |
| PRRT2        | 16p11.2       | 0.307777 | 7.97E-10 | 1.86E-08 |
| ENOX1        | 13q14.11      | -0.30752 | 8.24E-10 | 1.92E-08 |
| ANKRD65      | 1p36.33       | -0.3075  | 8.27E-10 | 1.92E-08 |
| CLEC3B       | 3p21.31       | -0.30742 | 8.35E-10 | 1.94E-08 |
| RARB         | 3p24.2        | -0.30739 | 8.38E-10 | 1.94E-08 |
| PTGIS        | 20q13.13      | -0.30737 | 8.41E-10 | 1.95E-08 |
| RNASEH2A     | 19p13.13      | 0.307359 | 8.42E-10 | 1.95E-08 |
| NPC2         | 14q24.3       | -0.30732 | 8.46E-10 | 1.95E-08 |

|           |          |          |          |          |
|-----------|----------|----------|----------|----------|
| ZNF677    | 19q13.42 | -0.30726 | 8.53E-10 | 1.97E-08 |
| DOHH      | 19p13.3  | 0.307207 | 8.59E-10 | 1.98E-08 |
| PLCH1     | 3q25.31  | 0.307099 | 8.72E-10 | 2.01E-08 |
| FXVD1     | 19q13.12 | -0.30701 | 8.82E-10 | 2.03E-08 |
| RRAGA     | 9p22.1   | -0.307   | 8.83E-10 | 2.03E-08 |
| RBM7      | 11q23.2  | -0.30698 | 8.86E-10 | 2.03E-08 |
| NRM       | 6p21.33  | 0.306908 | 8.94E-10 | 2.05E-08 |
| LINC00894 | Xq28     | 0.306848 | 9.01E-10 | 2.06E-08 |
| C1ORF226  | 1q23.3   | 0.306636 | 9.26E-10 | 2.12E-08 |
| ZNF121    | 19p13.2  | 0.306604 | 9.30E-10 | 2.12E-08 |
| SNRNP48   | 6p24.3   | 0.306584 | 9.33E-10 | 2.13E-08 |
| PLSCR3    | 17p13.1  | -0.30654 | 9.38E-10 | 2.14E-08 |
| TMEM167B  | 1p13.3   | -0.30652 | 9.41E-10 | 2.14E-08 |
| UNC50     | 2q11.2   | -0.30621 | 9.80E-10 | 2.23E-08 |
| ZNF627    | 19p13.2  | -0.30618 | 9.83E-10 | 2.23E-08 |
| SLC9A9    | 3q24     | -0.30594 | 1.02E-09 | 2.30E-08 |
| CTPS1     | 1p34.2   | 0.305911 | 1.02E-09 | 2.31E-08 |
| CALCRL    | 2q32.1   | -0.30588 | 1.02E-09 | 2.32E-08 |
| SPDYE6    | 7q22.1   | 0.30572  | 1.05E-09 | 2.36E-08 |
| PRKD1     | 14q12    | -0.30565 | 1.05E-09 | 2.38E-08 |
| BCL2L12   | 19q13.33 | 0.305577 | 1.06E-09 | 2.40E-08 |
| CRADD     | 12q22    | -0.30543 | 1.09E-09 | 2.45E-08 |
| DCAF15    | 19p13.12 | 0.305401 | 1.09E-09 | 2.45E-08 |
| CCDC115   | 2q21.1   | -0.30523 | 1.11E-09 | 2.50E-08 |
| DND1      | 5q31.3   | 0.305171 | 1.12E-09 | 2.52E-08 |
| FBXL8     | 16q22.1  | 0.30484  | 1.17E-09 | 2.63E-08 |
| SELENOM   | 22q12.2  | -0.30482 | 1.18E-09 | 2.63E-08 |
| APOD      | 3q29     | -0.30465 | 1.20E-09 | 2.69E-08 |
| SLC16A2   | Xq13.2   | -0.30463 | 1.20E-09 | 2.69E-08 |
| KHSRP     | 19p13.3  | 0.30457  | 1.21E-09 | 2.71E-08 |
| NUP214    | 9q34.13  | 0.304549 | 1.22E-09 | 2.72E-08 |
| TMPO      | 12q23.1  | 0.304436 | 1.24E-09 | 2.75E-08 |
| NPIPA1    | 16p13.11 | 0.304287 | 1.26E-09 | 2.80E-08 |
| BUB3      | 10q26.13 | 0.304284 | 1.26E-09 | 2.80E-08 |
| NSUN5P1   | 7q11.23  | 0.304172 | 1.28E-09 | 2.84E-08 |
| SPDYE5    | 7q11.23  | 0.304038 | 1.30E-09 | 2.89E-08 |
| ACOX1     | 17q25.1  | -0.30403 | 1.30E-09 | 2.89E-08 |
| SLC24A3   | 20p11.23 | -0.30402 | 1.31E-09 | 2.89E-08 |
| NAA40     | 11q13.1  | 0.303952 | 1.32E-09 | 2.91E-08 |
| STMN2     | 8q21.13  | -0.30385 | 1.33E-09 | 2.95E-08 |
| GPR1      | 2q33.3   | -0.30383 | 1.34E-09 | 2.95E-08 |
| TRABD     | 22q13.33 | 0.303791 | 1.34E-09 | 2.96E-08 |
| SKP1      | 5q31.1   | -0.30376 | 1.35E-09 | 2.97E-08 |
| SGCE      | 7q21.3   | -0.30361 | 1.38E-09 | 3.03E-08 |
| EIF1B     | 3p22.1   | -0.30357 | 1.38E-09 | 3.04E-08 |
| ZNF277    | 7q31.1   | -0.30345 | 1.41E-09 | 3.08E-08 |
| MIR17HG   | 13q31.3  | 0.303304 | 1.43E-09 | 3.14E-08 |
| TARBP1    | 1q42.2   | 0.30318  | 1.46E-09 | 3.19E-08 |
| TNPO2     | 19p13.13 | 0.303038 | 1.48E-09 | 3.24E-08 |
| CCN2      | 6q23.2   | -0.30298 | 1.50E-09 | 3.27E-08 |
| GLT8D2    | 12q23.3  | -0.30295 | 1.50E-09 | 3.27E-08 |
| ESRP2     | 16q22.1  | 0.302921 | 1.51E-09 | 3.28E-08 |
| BMPR1B    | 4q22.3   | -0.30286 | 1.52E-09 | 3.30E-08 |
| ILK       | 11p15.4  | -0.30283 | 1.52E-09 | 3.32E-08 |
| H2AFZ     | 4q23     | 0.30275  | 1.54E-09 | 3.34E-08 |
| ATRAID    | 2p23.3   | -0.30272 | 1.55E-09 | 3.35E-08 |
| SUSD5     | 3p22.3   | -0.30269 | 1.55E-09 | 3.37E-08 |
| RHOQ      | 2p21     | -0.30254 | 1.58E-09 | 3.43E-08 |

|           |                     |          |          |          |
|-----------|---------------------|----------|----------|----------|
| ATP13A1   | 19p13.11            | 0.302421 | 1.61E-09 | 3.48E-08 |
| ETNK2     | 1q32.1              | -0.30228 | 1.64E-09 | 3.54E-08 |
| GAP43     | 3q13.31             | -0.30222 | 1.65E-09 | 3.56E-08 |
| RNF185    | 22q12.2             | -0.3022  | 1.65E-09 | 3.57E-08 |
| HSF4      | 16q22.1             | 0.302092 | 1.68E-09 | 3.61E-08 |
| MSRB3     | 12q14.3             | -0.30208 | 1.68E-09 | 3.61E-08 |
| PCDHB4    | 5q31.3              | -0.30208 | 1.68E-09 | 3.61E-08 |
| SURF6     | 9q34.2              | 0.301937 | 1.71E-09 | 3.67E-08 |
| FERMT2    | 14q22.1             | -0.3018  | 1.74E-09 | 3.73E-08 |
| CDC42EP3  | 2p22.2              | -0.30178 | 1.75E-09 | 3.74E-08 |
| C1QTNF7   | 4p15.32             | -0.30178 | 1.75E-09 | 3.74E-08 |
| SPAST     | 2p22.3              | -0.30159 | 1.79E-09 | 3.83E-08 |
| PIK3C2B   | 1q32.1              | 0.301569 | 1.79E-09 | 3.83E-08 |
| LINC00685 | Xp22.33 and Yp11.31 | 0.301543 | 1.80E-09 | 3.84E-08 |
| CPXM2     | 10q26.13            | -0.30151 | 1.81E-09 | 3.85E-08 |
| ARMCX1    | Xq22.1              | -0.30147 | 1.82E-09 | 3.87E-08 |
| CPSF6     | 12q15               | 0.301351 | 1.85E-09 | 3.92E-08 |
| NOM1      | 7q36.3              | 0.301305 | 1.86E-09 | 3.94E-08 |
| CDRT15P1  | 17p12               | 0.301229 | 1.87E-09 | 3.98E-08 |
| CHRNA10   | 11p15.4             | 0.30122  | 1.88E-09 | 3.98E-08 |
| EHMT1     | 9q34.3              | 0.301059 | 1.92E-09 | 4.06E-08 |
| PRICKLE1  | 12q12               | -0.301   | 1.93E-09 | 4.09E-08 |
| TBC1D24   | 16p13.3             | 0.300764 | 1.99E-09 | 4.21E-08 |
| ECM2      | 9q22.31             | -0.30071 | 2.01E-09 | 4.23E-08 |
| SCLT1     | 4q28.2              | 0.300638 | 2.02E-09 | 4.27E-08 |
| ANKZF1    | 2q35                | 0.300629 | 2.03E-09 | 4.27E-08 |
| BNIP1     | 1q21.3              | 0.300617 | 2.03E-09 | 4.27E-08 |
| NEAT1     | 11q13.1             | 0.300582 | 2.04E-09 | 4.28E-08 |
| NCKAP5    | 2q21.2              | -0.30042 | 2.08E-09 | 4.37E-08 |
| LRP5L     | 22q11.23            | 0.300396 | 2.09E-09 | 4.38E-08 |
| IDS       | Xq28                | -0.30031 | 2.11E-09 | 4.42E-08 |
| ISG20L2   | 1q23.1              | 0.300242 | 2.13E-09 | 4.46E-08 |
| AHI1      | 6q23.3              | 0.30017  | 2.15E-09 | 4.49E-08 |
| FASN      | 17q25.3             | 0.29983  | 2.24E-09 | 4.69E-08 |
| CS        | 12q13.3             | 0.299808 | 2.25E-09 | 4.70E-08 |
| ANKRD36   | 2q11.2              | 0.299799 | 2.25E-09 | 4.70E-08 |
| CTSF      | 11q13.2             | -0.29974 | 2.27E-09 | 4.73E-08 |
| POLD3     | 11q13.4             | 0.299566 | 2.32E-09 | 4.83E-08 |
| EXOSC10   | 1p36.22             | 0.299345 | 2.39E-09 | 4.96E-08 |
| IGFBP4    | 17q21.2             | -0.29931 | 2.40E-09 | 4.98E-08 |
| DTYMK     | 2q37.3              | 0.299239 | 2.42E-09 | 5.02E-08 |
| ASCC1     | 10q22.1             | -0.29918 | 2.44E-09 | 5.05E-08 |
| C1R       | 12p13.31            | -0.29909 | 2.47E-09 | 5.11E-08 |
| PIGY      | 4q22.1              | -0.29905 | 2.48E-09 | 5.13E-08 |
| SCUBE2    | 11p15.4             | -0.29903 | 2.49E-09 | 5.13E-08 |
| F2R       | 5q13.3              | -0.29899 | 2.50E-09 | 5.15E-08 |
| SKA2      | 17q22               | 0.298987 | 2.50E-09 | 5.15E-08 |
| TMEM45A   | 3q12.2              | -0.29894 | 2.52E-09 | 5.18E-08 |
| NUP62CL   | Xq22.3              | 0.298806 | 2.56E-09 | 5.26E-08 |
| PRPF3     | 1q21.2              | 0.298687 | 2.60E-09 | 5.34E-08 |
| CAPZA2    | 7q31.2              | -0.29866 | 2.61E-09 | 5.35E-08 |
| RGS9      | 17q24.1             | -0.29851 | 2.66E-09 | 5.45E-08 |
| SNX27     | 1q21.3              | 0.298419 | 2.69E-09 | 5.51E-08 |
| SYT11     | 1q22                | -0.29833 | 2.72E-09 | 5.56E-08 |
| VEGFB     | 11q13.1             | -0.29828 | 2.74E-09 | 5.59E-08 |
| F10       | 13q34               | -0.29824 | 2.75E-09 | 5.62E-08 |
| HEATR1    | 1q43                | 0.298157 | 2.78E-09 | 5.67E-08 |
| MAD2L1    | 4q27                | 0.298143 | 2.79E-09 | 5.67E-08 |



|          |               |          |          |          |
|----------|---------------|----------|----------|----------|
| YJEFN3   | 19p13.11      | 0.298044 | 2.82E-09 | 5.74E-08 |
| CASD1    | 7q21.3        | -0.29803 | 2.83E-09 | 5.74E-08 |
| DDX39A   | 19p13.12      | 0.298016 | 2.83E-09 | 5.75E-08 |
| MAGED2   | Xp11.21       | -0.29799 | 2.84E-09 | 5.76E-08 |
| CCDC80   | 3q13.2        | -0.29796 | 2.85E-09 | 5.78E-08 |
| PPP1R2B  | 5q33.3        | -0.29789 | 2.88E-09 | 5.82E-08 |
| HACD4    | 9p21.3        | -0.29782 | 2.90E-09 | 5.87E-08 |
| CFAP157  | 9q34.11       | 0.297787 | 2.91E-09 | 5.89E-08 |
| PRCC     | 1q23.1        | 0.297768 | 2.92E-09 | 5.90E-08 |
| GGA1     | 22q13.1       | 0.297641 | 2.97E-09 | 5.99E-08 |
| WDHD1    | 14q22.2-q22.3 | 0.297475 | 3.03E-09 | 6.11E-08 |
| BPGM     | 7q33          | -0.29746 | 3.04E-09 | 6.12E-08 |
| FAM81A   | 15q22.2       | 0.297441 | 3.05E-09 | 6.12E-08 |
| MEF2C    | 5q14.3        | -0.29744 | 3.05E-09 | 6.12E-08 |
| KLHDC8B  | 3p21.31       | -0.29741 | 3.06E-09 | 6.13E-08 |
| CDKN2D   | 19p13.2       | 0.297316 | 3.09E-09 | 6.20E-08 |
| PPP1R3C  | 10q23.32      | -0.29723 | 3.13E-09 | 6.25E-08 |
| TCF3     | 19p13.3       | 0.297231 | 3.13E-09 | 6.25E-08 |
| CORIN    | 4p12          | -0.29723 | 3.13E-09 | 6.25E-08 |
| ZC3H11A  | 1q32.1        | 0.297171 | 3.15E-09 | 6.29E-08 |
| AHSA2P   | 2p15          | 0.297105 | 3.18E-09 | 6.34E-08 |
| KLHL24   | 3q27.1        | -0.29698 | 3.23E-09 | 6.43E-08 |
| ADM5     | 19q13.33      | 0.296932 | 3.25E-09 | 6.47E-08 |
| LIMD1    | 3p21.31       | 0.29691  | 3.26E-09 | 6.48E-08 |
| MIR600HG | 9q33.3        | 0.296908 | 3.26E-09 | 6.48E-08 |
| ANXA6    | 5q33.1        | -0.29688 | 3.27E-09 | 6.50E-08 |
| ARL14EP  | 11p14.1       | -0.29685 | 3.29E-09 | 6.51E-08 |
| F13A1    | 6p25.1        | -0.29683 | 3.29E-09 | 6.52E-08 |
| FBXO8    | 4q34.1        | -0.29666 | 3.36E-09 | 6.65E-08 |
| LY86     | 6p25.1        | -0.29666 | 3.36E-09 | 6.65E-08 |
| TAGLN2   | 1q23.2        | 0.29661  | 3.38E-09 | 6.69E-08 |
| PAIP1    | 5p12          | -0.29654 | 3.41E-09 | 6.74E-08 |
| PLAC9    | 10q22.3       | -0.2964  | 3.48E-09 | 6.85E-08 |
| PPP2R2B  | 5q32          | -0.29636 | 3.49E-09 | 6.88E-08 |
| ANKRD23  | 2q11.2        | 0.296332 | 3.51E-09 | 6.90E-08 |
| GPR3     | 1p36.11       | 0.296268 | 3.53E-09 | 6.94E-08 |
| ARRDC3   | 5q14.3        | -0.29626 | 3.54E-09 | 6.94E-08 |
| FAM133A  | Xq21.32       | -0.29625 | 3.54E-09 | 6.95E-08 |
| PACRG    | 6q26          | -0.2962  | 3.57E-09 | 6.99E-08 |
| GUCY1A1  | 4q32.1        | -0.29615 | 3.59E-09 | 7.02E-08 |
| BICDL2   | 16p13.3       | 0.296102 | 3.61E-09 | 7.06E-08 |
| BHMT2    | 5q14.1        | -0.29595 | 3.68E-09 | 7.19E-08 |
| S1PR3    | 9q22.1        | -0.29594 | 3.69E-09 | 7.20E-08 |
| AKT1S1   | 19q13.33      | 0.295923 | 3.69E-09 | 7.20E-08 |
| ZEB1     | 10p11.22      | -0.29591 | 3.70E-09 | 7.20E-08 |
| RAI2     | Xp22.13       | -0.2958  | 3.75E-09 | 7.30E-08 |
| CHRD1    | Xq23          | -0.29577 | 3.76E-09 | 7.32E-08 |
| HSPB2    | 11q23.1       | -0.29574 | 3.78E-09 | 7.34E-08 |
| NRF1     | 7q32.2        | 0.295726 | 3.79E-09 | 7.35E-08 |
| TYK2     | 19p13.2       | 0.295619 | 3.84E-09 | 7.44E-08 |
| OLFML1   | 11p15.4       | -0.2956  | 3.84E-09 | 7.45E-08 |
| NOC2L    | 1p36.33       | 0.29557  | 3.86E-09 | 7.47E-08 |
| MAGEH1   | Xp11.21       | -0.29541 | 3.94E-09 | 7.61E-08 |
| GLIPR2   | 9p13.3        | -0.29539 | 3.95E-09 | 7.62E-08 |
| EBLN2    | 3p13          | 0.295389 | 3.95E-09 | 7.62E-08 |
| ZFPM2    | 8q23.1        | -0.29534 | 3.97E-09 | 7.66E-08 |
| IGFBP6   | 12q13.13      | -0.29531 | 3.99E-09 | 7.68E-08 |
| AMZ2P1   | 17q24.1       | -0.29528 | 4.01E-09 | 7.71E-08 |

|           |          |          |          |          |
|-----------|----------|----------|----------|----------|
| MTA2      | 11q12.3  | 0.29519  | 4.05E-09 | 7.78E-08 |
| CPT1B     | 22q13.33 | 0.295184 | 4.05E-09 | 7.78E-08 |
| ENTR1     | 9q34.3   | 0.295165 | 4.06E-09 | 7.79E-08 |
| RANGAP1   | 22q13.2  | 0.295159 | 4.07E-09 | 7.79E-08 |
| ADPRH     | 3q13.33  | -0.29488 | 4.21E-09 | 8.07E-08 |
| FAM111A   | 11q12.1  | 0.294815 | 4.25E-09 | 8.12E-08 |
| DACT1     | 14q23.1  | -0.29479 | 4.26E-09 | 8.13E-08 |
| MRPL55    | 1q42.13  | 0.29479  | 4.26E-09 | 8.13E-08 |
| RARRES2   | 7q36.1   | -0.29477 | 4.27E-09 | 8.15E-08 |
| FRMD6     | 14q22.1  | -0.29467 | 4.33E-09 | 8.24E-08 |
| MIR99AHG  | 21q21.1  | -0.29466 | 4.33E-09 | 8.24E-08 |
| ST13      | 22q13.2  | -0.2946  | 4.36E-09 | 8.28E-08 |
| TAGLN     | 11q23.3  | -0.2946  | 4.36E-09 | 8.28E-08 |
| SPDYE7P   | 7q11.23  | 0.294599 | 4.36E-09 | 8.28E-08 |
| GCN1      | 12q24.23 | 0.294564 | 4.38E-09 | 8.31E-08 |
| PJA2      | 5q21.3   | -0.29454 | 4.39E-09 | 8.32E-08 |
| SH3GLB1   | 1p22.3   | -0.29454 | 4.40E-09 | 8.32E-08 |
| CLEC2B    | 12p13.31 | -0.29452 | 4.41E-09 | 8.33E-08 |
| CES1P1    | 16q12.2  | -0.29439 | 4.48E-09 | 8.46E-08 |
| GOLGA2P7  | 15q25.2  | 0.294335 | 4.51E-09 | 8.51E-08 |
| RBM33     | 7q36.3   | 0.294224 | 4.57E-09 | 8.63E-08 |
| OTUD3     | 1p36.13  | 0.294191 | 4.59E-09 | 8.65E-08 |
| ZNF165    | 6p22.1   | 0.294136 | 4.63E-09 | 8.71E-08 |
| RACGAP1P  | 12q12    | 0.294117 | 4.64E-09 | 8.72E-08 |
| KCNJ14    | 19q13.33 | 0.293933 | 4.74E-09 | 8.91E-08 |
| RTN4      | 2p16.1   | -0.29393 | 4.74E-09 | 8.91E-08 |
| TMEM86B   | 19q13.42 | 0.29389  | 4.77E-09 | 8.95E-08 |
| CSAD      | 12q13.13 | 0.29381  | 4.82E-09 | 9.03E-08 |
| LMO3      | 12p12.3  | -0.29371 | 4.88E-09 | 9.14E-08 |
| ABI3BP    | 3q12.2   | -0.29362 | 4.94E-09 | 9.23E-08 |
| CX3CR1    | 3p22.2   | -0.29343 | 5.05E-09 | 9.44E-08 |
| APOBEC3C  | 22q13.1  | -0.29341 | 5.07E-09 | 9.46E-08 |
| LOC283731 | 15q24.1  | -0.2934  | 5.07E-09 | 9.46E-08 |
| UBE2B     | 5q31.1   | -0.29321 | 5.19E-09 | 9.67E-08 |
| WDR4      | 21q22.3  | 0.29314  | 5.24E-09 | 9.75E-08 |
| TUBGCP6   | 22q13.33 | 0.293113 | 5.26E-09 | 9.78E-08 |
| C11ORF68  | 11q13.1  | -0.2931  | 5.27E-09 | 9.79E-08 |
| KLF17     | 1p34.1   | -0.29301 | 5.33E-09 | 9.89E-08 |
| LINC01140 | 1p22.3   | -0.29299 | 5.34E-09 | 9.90E-08 |
| DNHD1     | 11p15.4  | 0.292974 | 5.35E-09 | 9.91E-08 |
| HSPB8     | 12q24.23 | -0.29287 | 5.42E-09 | 1.00E-07 |
| FAM174A   | 5q21.1   | -0.29286 | 5.43E-09 | 1.00E-07 |
| ARMH4     | 14q23.1  | -0.29281 | 5.46E-09 | 1.01E-07 |
| LRRC32    | 11q13.5  | -0.29279 | 5.47E-09 | 1.01E-07 |
| PALLD     | 4q32.3   | -0.29273 | 5.51E-09 | 1.02E-07 |
| FEZ2      | 2p22.2   | -0.29267 | 5.55E-09 | 1.02E-07 |
| LUM       | 12q21.33 | -0.29263 | 5.59E-09 | 1.03E-07 |
| TRA2B     | 3q27.2   | 0.292622 | 5.59E-09 | 1.03E-07 |
| ACIN1     | 14q11.2  | 0.29253  | 5.66E-09 | 1.04E-07 |
| ABCG1     | 21q22.3  | -0.29252 | 5.66E-09 | 1.04E-07 |
| SLC8A1    | 2p22.1   | -0.29243 | 5.72E-09 | 1.05E-07 |
| SMIM30    | 7q31.1   | -0.29239 | 5.75E-09 | 1.05E-07 |
| ALKBH6    | 19q13.12 | 0.292389 | 5.76E-09 | 1.05E-07 |
| KCTD18    | 2q33.1   | -0.29239 | 5.76E-09 | 1.05E-07 |
| FCER1A    | 1q23.2   | -0.29232 | 5.81E-09 | 1.06E-07 |
| CALD1     | 7q33     | -0.29202 | 6.02E-09 | 1.10E-07 |
| TNFAIP8L3 | 15q21.2  | -0.29197 | 6.07E-09 | 1.11E-07 |
| ATP6AP2   | Xp11.4   | -0.29191 | 6.11E-09 | 1.11E-07 |

|          |                |          |          |          |
|----------|----------------|----------|----------|----------|
| CENPT    | 16q22.1        | 0.291804 | 6.19E-09 | 1.13E-07 |
| POLD2    | 7p13           | 0.291772 | 6.22E-09 | 1.13E-07 |
| ASAH1    | 8p22           | -0.29174 | 6.24E-09 | 1.13E-07 |
| CALHM5   | 6q22.1         | -0.29171 | 6.26E-09 | 1.14E-07 |
| LHFPL6   | 13q13.3-q14.11 | -0.29167 | 6.30E-09 | 1.14E-07 |
| MBNL2    | 13q32.1        | -0.29161 | 6.34E-09 | 1.15E-07 |
| WBP1L    | 10q24.32       | -0.2916  | 6.35E-09 | 1.15E-07 |
| ZNF365   | 10q21.2        | -0.29159 | 6.36E-09 | 1.15E-07 |
| IQCC     | 1p35.2         | 0.291566 | 6.38E-09 | 1.15E-07 |
| SGTB     | 5q12.3         | -0.2914  | 6.51E-09 | 1.18E-07 |
| SPPL2B   | 19p13.3        | 0.291347 | 6.55E-09 | 1.18E-07 |
| TPST1    | 7q11.21        | -0.29132 | 6.57E-09 | 1.18E-07 |
| ZWILCH   | 15q22.31       | 0.2912   | 6.67E-09 | 1.20E-07 |
| PRSS23   | 11q14.2        | -0.29103 | 6.81E-09 | 1.23E-07 |
| OGN      | 9q22.31        | -0.29103 | 6.81E-09 | 1.23E-07 |
| CYYR1    | 21q21.3        | -0.29093 | 6.90E-09 | 1.24E-07 |
| EVA1A    | 2p12           | -0.29087 | 6.95E-09 | 1.25E-07 |
| CNRIP1   | 2p14           | -0.29087 | 6.95E-09 | 1.25E-07 |
| ELOVL4   | 6q14.1         | -0.29058 | 7.21E-09 | 1.29E-07 |
| DNAJC18  | 5q31.2         | -0.29048 | 7.30E-09 | 1.31E-07 |
| CNTN1    | 12q12          | -0.29044 | 7.34E-09 | 1.31E-07 |
| GAPDHS   | 19q13.12       | 0.290429 | 7.34E-09 | 1.31E-07 |
| EDNRA    | 4q31.22-q31.23 | -0.2904  | 7.37E-09 | 1.31E-07 |
| PPIL2    | 22q11.21       | 0.290342 | 7.42E-09 | 1.32E-07 |
| GINS2    | 16q24.1        | 0.290314 | 7.45E-09 | 1.33E-07 |
| FOXN3    | 14q31.3-q32.11 | -0.29028 | 7.48E-09 | 1.33E-07 |
| DPH7     | 9q34.3         | 0.290224 | 7.53E-09 | 1.34E-07 |
| ECEL1    | 2q37.1         | -0.29012 | 7.63E-09 | 1.36E-07 |
| RBP1     | 3q23           | -0.29001 | 7.73E-09 | 1.37E-07 |
| CCNDBP1  | 15q15.2        | -0.28996 | 7.79E-09 | 1.38E-07 |
| ANO8     | 19p13.11       | 0.289927 | 7.81E-09 | 1.38E-07 |
| GMNN     | 6p22.3         | 0.289909 | 7.83E-09 | 1.39E-07 |
| NSUN5P2  | 7q11.23        | 0.289828 | 7.91E-09 | 1.40E-07 |
| SFI1     | 22q12.2        | 0.289814 | 7.92E-09 | 1.40E-07 |
| PKP4     | 2q24.1         | 0.289808 | 7.93E-09 | 1.40E-07 |
| MCM6     | 2q21.3         | 0.289768 | 7.97E-09 | 1.41E-07 |
| SERPING1 | 11q12.1        | -0.28972 | 8.01E-09 | 1.41E-07 |
| JAM3     | 11q25          | -0.28954 | 8.19E-09 | 1.44E-07 |
| GNG2     | 14q22.1        | -0.28954 | 8.19E-09 | 1.44E-07 |
| PARVA    | 11p15.3        | -0.28954 | 8.20E-09 | 1.44E-07 |
| YIPF5    | 5q31.3         | -0.28953 | 8.21E-09 | 1.44E-07 |
| TCF4     | 18q21.2        | -0.2895  | 8.24E-09 | 1.45E-07 |
| NOL6     | 9p13.3         | 0.28949  | 8.25E-09 | 1.45E-07 |
| WLS      | 1p31.3         | -0.28946 | 8.28E-09 | 1.45E-07 |
| PHYHIPL  | 10q21.1        | -0.28943 | 8.31E-09 | 1.45E-07 |
| TSPAN2   | 1p13.2         | -0.28943 | 8.31E-09 | 1.45E-07 |
| COQ10B   | 2q33.1         | -0.28942 | 8.32E-09 | 1.45E-07 |
| LMAN1L   | 15q24.1        | 0.289295 | 8.45E-09 | 1.47E-07 |
| ZNF628   | 19q13.42       | 0.289183 | 8.56E-09 | 1.49E-07 |
| IARS     | 9q22.31        | 0.289178 | 8.57E-09 | 1.49E-07 |
| APP      | 21q21.3        | -0.28913 | 8.62E-09 | 1.50E-07 |
| HERC2P2  | 15q11.2        | 0.28905  | 8.70E-09 | 1.51E-07 |
| PLAT     | 8p11.21        | -0.28901 | 8.75E-09 | 1.52E-07 |
| CASQ2    | 1p13.1         | -0.28884 | 8.93E-09 | 1.55E-07 |
| SCX      | 8q24.3         | 0.288759 | 9.02E-09 | 1.57E-07 |
| ISM1     | 20p12.1        | -0.28875 | 9.04E-09 | 1.57E-07 |
| PAPOLG   | 2p16.1         | -0.28863 | 9.17E-09 | 1.59E-07 |
| PKNOX2   | 11q24.2        | -0.28862 | 9.18E-09 | 1.59E-07 |

|              |               |          |          |          |
|--------------|---------------|----------|----------|----------|
| LAMP5        | 20p12.2       | -0.28859 | 9.21E-09 | 1.59E-07 |
| LOC100132287 | 1p36.33       | 0.288541 | 9.27E-09 | 1.60E-07 |
| HEXA         | 15q23         | -0.28851 | 9.30E-09 | 1.61E-07 |
| RASSF8       | 12p12.1       | -0.28846 | 9.36E-09 | 1.61E-07 |
| TP53TG1      | 7q21.12       | -0.28846 | 9.36E-09 | 1.61E-07 |
| TPST2        | 22q12.1       | -0.28845 | 9.38E-09 | 1.61E-07 |
| TRIM34       | 11p15.4       | -0.28839 | 9.44E-09 | 1.62E-07 |
| LCA5         | 6q14.1        | -0.28837 | 9.46E-09 | 1.63E-07 |
| DHX40        | 17q23.1       | -0.28832 | 9.52E-09 | 1.63E-07 |
| SELENOF      | 1p22.3        | -0.28829 | 9.55E-09 | 1.64E-07 |
| ABCA7        | 19p13.3       | 0.288258 | 9.60E-09 | 1.65E-07 |
| NAP1L2       | Xq13.2        | -0.28819 | 9.68E-09 | 1.66E-07 |
| LARP1        | 5q33.2        | 0.287774 | 1.02E-08 | 1.74E-07 |
| EVI2A        | 17q11.2       | -0.28776 | 1.02E-08 | 1.74E-07 |
| CEP128       | 14q31.1       | 0.287681 | 1.03E-08 | 1.76E-07 |
| ZNF624       | 17p11.2       | -0.28764 | 1.04E-08 | 1.77E-07 |
| MAP3K7CL     | 21q21.3       | -0.28757 | 1.04E-08 | 1.78E-07 |
| RERGL        | 12p12.3       | -0.28739 | 1.07E-08 | 1.82E-07 |
| ANKRD6       | 6q15          | -0.28729 | 1.08E-08 | 1.84E-07 |
| PRR5-ARHGAP8 | 22q13.31      | 0.287268 | 1.08E-08 | 1.84E-07 |
| LIPA         | 10q23.31      | -0.28721 | 1.09E-08 | 1.85E-07 |
| KPNB1        | 17q21.32      | 0.287169 | 1.10E-08 | 1.86E-07 |
| GLIPR1       | 12q21.2       | -0.28716 | 1.10E-08 | 1.86E-07 |
| HIST2H3C     | 1q21.2        | 0.287113 | 1.10E-08 | 1.87E-07 |
| TUSC3        | 8p22          | -0.2871  | 1.11E-08 | 1.87E-07 |
| UCHL5        | 1q31.2        | 0.286919 | 1.13E-08 | 1.91E-07 |
| FDPS         | 1q22          | 0.286863 | 1.14E-08 | 1.93E-07 |
| LRRC4C       | 11p12         | -0.28673 | 1.16E-08 | 1.95E-07 |
| SAT2         | 17p13.1       | -0.28666 | 1.17E-08 | 1.97E-07 |
| PRKAR1A      | 17q24.2       | -0.28665 | 1.17E-08 | 1.97E-07 |
| NRBP1        | 2p23.3        | -0.28661 | 1.17E-08 | 1.98E-07 |
| GINM1        | 6q25.1        | -0.28658 | 1.18E-08 | 1.99E-07 |
| PODN         | 1p32.3        | -0.28655 | 1.18E-08 | 1.99E-07 |
| KRT222       | 17q21.2       | -0.28645 | 1.20E-08 | 2.01E-07 |
| DIAPH1       | 5q31.3        | 0.28644  | 1.20E-08 | 2.01E-07 |
| TBC1D10B     | 16p11.2       | 0.286415 | 1.20E-08 | 2.02E-07 |
| ATAT1        | 6p21.33       | 0.286343 | 1.21E-08 | 2.03E-07 |
| HEBP1        | 12p13.1       | -0.28631 | 1.22E-08 | 2.04E-07 |
| MFSD2B       | 2p23.3        | 0.2863   | 1.22E-08 | 2.04E-07 |
| PGR          | 11q22.1       | -0.2862  | 1.23E-08 | 2.07E-07 |
| EFHD1        | 2q37.1        | -0.28616 | 1.24E-08 | 2.07E-07 |
| RFTN1        | 3p24.3        | -0.28611 | 1.25E-08 | 2.08E-07 |
| CDK10        | 16q24.3       | 0.28582  | 1.29E-08 | 2.16E-07 |
| MTHFD1       | 14q23.3       | 0.285797 | 1.30E-08 | 2.16E-07 |
| NUDT11       | Xp11.22       | -0.28564 | 1.32E-08 | 2.20E-07 |
| PMP22        | 17p12         | -0.28554 | 1.34E-08 | 2.23E-07 |
| ACVR2A       | 2q22.3-q23.1  | -0.28548 | 1.35E-08 | 2.24E-07 |
| GSTM5        | 1p13.3        | -0.28545 | 1.35E-08 | 2.25E-07 |
| FIBIN        | 11p14.2       | -0.28535 | 1.37E-08 | 2.27E-07 |
| PHRF1        | 11p15.5       | 0.28533  | 1.37E-08 | 2.28E-07 |
| TJAP1        | 6p21.1        | 0.285262 | 1.38E-08 | 2.29E-07 |
| AGTR1        | 3q24          | -0.28523 | 1.39E-08 | 2.30E-07 |
| NTN4         | 12q22         | -0.28522 | 1.39E-08 | 2.30E-07 |
| FNDC4        | 2p23.3        | -0.28518 | 1.40E-08 | 2.31E-07 |
| GRIN2D       | 19q13.33      | 0.285163 | 1.40E-08 | 2.31E-07 |
| BAALC        | 8q22.3        | -0.28516 | 1.40E-08 | 2.31E-07 |
| GDF10        | 10q11.22      | -0.28514 | 1.40E-08 | 2.32E-07 |
| SNAP23       | 15q15.1-q15.2 | -0.28506 | 1.42E-08 | 2.34E-07 |

|              |          |          |          |          |
|--------------|----------|----------|----------|----------|
| STON1        | 2p16.3   | -0.28496 | 1.43E-08 | 2.36E-07 |
| ADAMTSL3     | 15q25.2  | -0.2849  | 1.44E-08 | 2.38E-07 |
| FHL1         | Xq26.3   | -0.28488 | 1.45E-08 | 2.38E-07 |
| SCPEP1       | 17q22    | -0.28485 | 1.45E-08 | 2.39E-07 |
| CCDC91       | 12p11.22 | -0.28478 | 1.47E-08 | 2.41E-07 |
| NUDT5        | 10p14    | 0.284682 | 1.48E-08 | 2.43E-07 |
| ANKRD35      | 1q21.1   | -0.28464 | 1.49E-08 | 2.44E-07 |
| SLC35F5      | 2q14.1   | -0.28462 | 1.50E-08 | 2.45E-07 |
| CLSTN2       | 3q23     | -0.28461 | 1.50E-08 | 2.45E-07 |
| TMEM120B     | 12q24.31 | 0.284406 | 1.53E-08 | 2.51E-07 |
| CNTD2        | 19q13.2  | 0.284396 | 1.54E-08 | 2.51E-07 |
| ZBTB7B       | 1q21.3   | 0.284361 | 1.54E-08 | 2.52E-07 |
| C1RL         | 12p13.31 | -0.28431 | 1.55E-08 | 2.53E-07 |
| CRBN         | 3p26.2   | -0.28423 | 1.57E-08 | 2.56E-07 |
| DZIP1        | 13q32.1  | -0.28413 | 1.59E-08 | 2.58E-07 |
| RBM17        | 10p15.1  | 0.284046 | 1.60E-08 | 2.61E-07 |
| ZNF767P      | 7q36.1   | 0.283973 | 1.62E-08 | 2.63E-07 |
| LRP12        | 8q22.3   | -0.28387 | 1.64E-08 | 2.66E-07 |
| NDN          | 15q11.2  | -0.28384 | 1.64E-08 | 2.67E-07 |
| SYS1         | 20q13.12 | -0.28382 | 1.65E-08 | 2.67E-07 |
| WASHC3       | 12q23.2  | -0.28382 | 1.65E-08 | 2.67E-07 |
| ARF1         | 1q42.13  | 0.28379  | 1.65E-08 | 2.68E-07 |
| THAP1        | 8p11.21  | -0.28378 | 1.66E-08 | 2.68E-07 |
| YPEL2        | 17q22    | -0.28369 | 1.67E-08 | 2.70E-07 |
| FSCN2        | 17q25.3  | 0.283645 | 1.68E-08 | 2.72E-07 |
| ZNF8         | 19q13.43 | 0.283562 | 1.70E-08 | 2.74E-07 |
| DIXDC1       | 11q23.1  | -0.28347 | 1.72E-08 | 2.77E-07 |
| PCDHB5       | 5q31.3   | -0.28345 | 1.72E-08 | 2.77E-07 |
| SNX29P2      | 16p11.2  | 0.283406 | 1.73E-08 | 2.79E-07 |
| GADD45A      | 1p31.3   | -0.28339 | 1.73E-08 | 2.79E-07 |
| MMADHC       | 2q23.2   | -0.28337 | 1.74E-08 | 2.80E-07 |
| NUP43        | 6q25.1   | 0.283359 | 1.74E-08 | 2.80E-07 |
| FAM120A      | 9q22.31  | 0.283346 | 1.74E-08 | 2.80E-07 |
| FAM110B      | 8q12.1   | -0.28334 | 1.75E-08 | 2.80E-07 |
| DXO          | 6p21.33  | 0.283285 | 1.76E-08 | 2.81E-07 |
| NELFB        | 9q34.3   | 0.283281 | 1.76E-08 | 2.81E-07 |
| FBXO45       | 3q29     | 0.283263 | 1.76E-08 | 2.82E-07 |
| MRRF         | 9q33.2   | 0.283249 | 1.76E-08 | 2.82E-07 |
| ST3GAL3      | 1p34.1   | -0.2831  | 1.80E-08 | 2.87E-07 |
| TNFSF10      | 3q26.31  | -0.28309 | 1.80E-08 | 2.87E-07 |
| HPGDS        | 4q22.3   | -0.28303 | 1.81E-08 | 2.89E-07 |
| UVSSA        | 4p16.3   | 0.283008 | 1.82E-08 | 2.89E-07 |
| HAUS7        | Xq28     | 0.282937 | 1.83E-08 | 2.92E-07 |
| APOBEC3F     | 22q13.1  | -0.2827  | 1.89E-08 | 3.00E-07 |
| MEIS3P1      | 17p12    | -0.28266 | 1.89E-08 | 3.01E-07 |
| MFAP2        | 1p36.13  | -0.28264 | 1.90E-08 | 3.01E-07 |
| TAF2         | 12q14.1  | -0.28253 | 1.92E-08 | 3.05E-07 |
| GALNT17      | 7q11.22  | -0.28234 | 1.97E-08 | 3.12E-07 |
| EXD3         | 9q34.3   | 0.282319 | 1.97E-08 | 3.13E-07 |
| YTHDF3       | 8q12.3   | -0.28229 | 1.98E-08 | 3.13E-07 |
| OST4         | 2p23.3   | -0.28225 | 1.99E-08 | 3.14E-07 |
| TNFRSF14-AS1 | 1p36.32  | 0.282248 | 1.99E-08 | 3.14E-07 |
| CKAP2        | 13q14.3  | 0.282094 | 2.03E-08 | 3.20E-07 |
| FAM71D       | 14q23.3  | 0.282046 | 2.04E-08 | 3.22E-07 |
| ISLR         | 15q24.1  | -0.28199 | 2.05E-08 | 3.24E-07 |
| FBXO32       | 8q24.13  | -0.28183 | 2.09E-08 | 3.29E-07 |
| LINC00847    | 5q35.3   | -0.28183 | 2.09E-08 | 3.29E-07 |
| MRPL9        | 1q21.3   | 0.281817 | 2.09E-08 | 3.30E-07 |

|           |               |          |          |          |
|-----------|---------------|----------|----------|----------|
| LINC02381 | 12q13.13      | -0.28178 | 2.10E-08 | 3.31E-07 |
| ZNF497    | 19q13.43      | 0.281715 | 2.12E-08 | 3.33E-07 |
| VXN       | 8q13.1        | -0.28162 | 2.14E-08 | 3.37E-07 |
| RAB8B     | 15q22.2       | -0.28146 | 2.19E-08 | 3.43E-07 |
| HCFC2     | 12q23.3       | -0.2814  | 2.20E-08 | 3.45E-07 |
| TCEAL8    | Xq22.1        | -0.28132 | 2.22E-08 | 3.48E-07 |
| MIER1     | 1p31.3        | -0.28129 | 2.23E-08 | 3.49E-07 |
| PPT1      | 1p34.2        | -0.28128 | 2.23E-08 | 3.49E-07 |
| LEMD2     | 6p21.31       | 0.281245 | 2.24E-08 | 3.50E-07 |
| NRXN3     | 14q24.3-q31.1 | -0.28113 | 2.27E-08 | 3.55E-07 |
| DROSHA    | 5p13.3        | 0.281108 | 2.28E-08 | 3.56E-07 |
| PPP1R3E   | 14q11.2       | 0.281042 | 2.30E-08 | 3.58E-07 |
| TMEM98    | 17q11.2       | -0.28092 | 2.33E-08 | 3.63E-07 |
| LAMP2     | Xq24          | -0.28076 | 2.38E-08 | 3.70E-07 |
| ZNF296    | 19q13.32      | 0.280702 | 2.39E-08 | 3.72E-07 |
| GNG12     | 1p31.3        | -0.28067 | 2.40E-08 | 3.73E-07 |
| PRRC2C    | 1q24.3        | 0.280608 | 2.42E-08 | 3.76E-07 |
| GREM1     | 15q13.3       | -0.28058 | 2.43E-08 | 3.76E-07 |
| CTRL      | 16q22.1       | 0.280546 | 2.44E-08 | 3.78E-07 |
| DHX16     | 6p21.33       | 0.280537 | 2.44E-08 | 3.78E-07 |
| FAM107A   | 3p14.3-p14.2  | -0.2805  | 2.45E-08 | 3.79E-07 |
| PTK7      | 6p21.1        | -0.28049 | 2.46E-08 | 3.80E-07 |
| VKORC1    | 16p11.2       | -0.28048 | 2.46E-08 | 3.80E-07 |
| TINF2     | 14q12         | -0.28048 | 2.46E-08 | 3.80E-07 |
| FILIP1L   | 3q12.1        | -0.28047 | 2.46E-08 | 3.80E-07 |
| KERA      | 12q21.33      | -0.28043 | 2.47E-08 | 3.81E-07 |
| RDX       | 11q22.3       | -0.28041 | 2.48E-08 | 3.82E-07 |
| TMEM30A   | 6q14.1        | -0.28027 | 2.52E-08 | 3.88E-07 |
| NDE1      | 16p13.11      | 0.280251 | 2.52E-08 | 3.88E-07 |
| CREBRF    | 5q35.1        | -0.28025 | 2.53E-08 | 3.88E-07 |
| GSDME     | 7p15.3        | -0.28021 | 2.54E-08 | 3.90E-07 |
| VCAM1     | 1p21.2        | -0.28016 | 2.55E-08 | 3.91E-07 |
| SFRP5     | 10q24.2       | -0.28016 | 2.55E-08 | 3.91E-07 |
| PEG3      | 19q13.43      | -0.28013 | 2.56E-08 | 3.93E-07 |
| TNN       | 1q25.1        | -0.2801  | 2.57E-08 | 3.94E-07 |
| DYNC111   | 7q21.3        | -0.28009 | 2.57E-08 | 3.94E-07 |
| FAM200A   | 7q22.1        | -0.28008 | 2.58E-08 | 3.94E-07 |
| DOK6      | 18q22.2       | -0.28005 | 2.59E-08 | 3.95E-07 |
| NUP210    | 3p25.1        | 0.280042 | 2.59E-08 | 3.95E-07 |
| GPATCH4   | 1q22-q23.1    | 0.280013 | 2.60E-08 | 3.96E-07 |
| SPATA33   | 16q24.3       | 0.280009 | 2.60E-08 | 3.96E-07 |
| LRRC14    | 8q24.3        | 0.279967 | 2.61E-08 | 3.98E-07 |
| CYP27A1   | 2q35          | -0.27996 | 2.61E-08 | 3.98E-07 |
| FNBP4     | 11p11.2       | 0.279888 | 2.64E-08 | 4.01E-07 |
| VEGFC     | 4q34.3        | -0.27984 | 2.65E-08 | 4.03E-07 |
| DNPH1     | 6p21.1        | 0.279777 | 2.67E-08 | 4.06E-07 |
| PCNX3     | 11q13.1       | 0.279592 | 2.73E-08 | 4.14E-07 |
| EPDR1     | 7p14.1        | -0.27948 | 2.77E-08 | 4.20E-07 |
| RCC1      | 1p35.3        | 0.279391 | 2.80E-08 | 4.24E-07 |
| FBLN5     | 14q32.12      | -0.27938 | 2.80E-08 | 4.24E-07 |
| LDB2      | 4p15.32       | -0.27935 | 2.81E-08 | 4.25E-07 |
| SCAF4     | 21q22.11      | 0.279325 | 2.82E-08 | 4.26E-07 |
| RHPN1     | 8q24.3        | 0.279263 | 2.84E-08 | 4.29E-07 |
| TRMT1     | 19p13.13      | 0.279259 | 2.84E-08 | 4.29E-07 |
| KCNJ8     | 12p12.1       | -0.27918 | 2.87E-08 | 4.32E-07 |
| TFDP1     | 13q34         | 0.279127 | 2.89E-08 | 4.35E-07 |
| GPR75     | 2p16.2        | 0.27906  | 2.91E-08 | 4.38E-07 |
| PI16      | 6p21.2        | -0.279   | 2.93E-08 | 4.40E-07 |

|            |               |          |          |          |
|------------|---------------|----------|----------|----------|
| ADAM23     | 2q33.3        | -0.279   | 2.93E-08 | 4.40E-07 |
| TRIM26     | 6p22.1        | 0.278998 | 2.93E-08 | 4.40E-07 |
| RBM6       | 3p21.31       | 0.278943 | 2.95E-08 | 4.43E-07 |
| CYP7B1     | 8q12.3        | -0.27891 | 2.96E-08 | 4.44E-07 |
| KCNE4      | 2q36.1        | -0.27889 | 2.97E-08 | 4.45E-07 |
| CCNE1      | 19q12         | 0.27884  | 2.98E-08 | 4.47E-07 |
| DSEL       | 18q22.1       | -0.27883 | 2.99E-08 | 4.47E-07 |
| CLIP4      | 2p23.2        | -0.27881 | 2.99E-08 | 4.48E-07 |
| RBM25      | 14q24.2       | 0.278801 | 3.00E-08 | 4.48E-07 |
| SOCS5      | 2p21          | -0.2788  | 3.00E-08 | 4.48E-07 |
|            | 2-Mar 19p13.2 | -0.27861 | 3.07E-08 | 4.58E-07 |
| NXPH3      | 17q21.33      | -0.27856 | 3.08E-08 | 4.60E-07 |
| TSC22D3    | Xq22.3        | -0.27853 | 3.10E-08 | 4.61E-07 |
| CNTF       | 11q12.1       | 0.278497 | 3.11E-08 | 4.63E-07 |
| HTR7       | 10q23.31      | -0.27848 | 3.11E-08 | 4.63E-07 |
| ACTA2      | 10q23.31      | -0.27839 | 3.15E-08 | 4.68E-07 |
| CDKN1C     | 11p15.4       | -0.27827 | 3.19E-08 | 4.74E-07 |
| CCDC85C    | 14q32.2       | 0.278259 | 3.20E-08 | 4.75E-07 |
| SCART1     | 10q26.3       | 0.278253 | 3.20E-08 | 4.75E-07 |
| SEMA3E     | 7q21.11       | -0.27821 | 3.21E-08 | 4.76E-07 |
| SRI        | 7q21.12       | -0.27817 | 3.23E-08 | 4.79E-07 |
| RFTN2      | 2q33.1        | -0.27809 | 3.26E-08 | 4.83E-07 |
| NIPIB3     | 16p12.2       | 0.277985 | 3.30E-08 | 4.88E-07 |
| CKS2       | 9q22.2        | 0.277901 | 3.33E-08 | 4.93E-07 |
| HOXD11     | 2q31.1        | -0.27789 | 3.34E-08 | 4.93E-07 |
| CAVIN2     | 2q32.3        | -0.27788 | 3.34E-08 | 4.94E-07 |
| PIGK       | 1p31.1        | -0.27784 | 3.36E-08 | 4.95E-07 |
| ZDHHC23    | 3q13.31       | 0.277827 | 3.36E-08 | 4.96E-07 |
| TRAM1L1    | 4q26          | -0.27781 | 3.37E-08 | 4.96E-07 |
| DDIAS      | 11q14.1       | 0.277803 | 3.37E-08 | 4.96E-07 |
| MCM3AP-AS1 | 21q22.3       | 0.277764 | 3.39E-08 | 4.98E-07 |
| NFKBID     | 19q13.12      | 0.277746 | 3.40E-08 | 4.99E-07 |
| FAM172A    | 5q15          | -0.27773 | 3.40E-08 | 5.00E-07 |
| PAQR6      | 1q22          | 0.277723 | 3.41E-08 | 5.00E-07 |
| GGTA1P     | 9q33.2        | -0.27771 | 3.41E-08 | 5.00E-07 |
| TMEM204    | 16p13.3       | -0.27769 | 3.42E-08 | 5.01E-07 |
| FGL2       | 7q11.23       | -0.27766 | 3.43E-08 | 5.02E-07 |
| SDC4       | 20q13.12      | -0.27763 | 3.44E-08 | 5.04E-07 |
| LINC00628  | 1q32.1        | 0.277552 | 3.47E-08 | 5.08E-07 |
| PCDHB6     | 5q31.3        | -0.27754 | 3.48E-08 | 5.08E-07 |
| CMTM4      | 16q21-q22.1   | 0.277523 | 3.49E-08 | 5.09E-07 |
| CAMSAP3    | 19p13.2       | 0.277523 | 3.49E-08 | 5.09E-07 |
| PBK        | 8p21.1        | 0.277488 | 3.50E-08 | 5.10E-07 |
| EDEM2      | 20q11.22      | -0.27746 | 3.51E-08 | 5.12E-07 |
| MFAP5      | 12p13.31      | -0.27741 | 3.53E-08 | 5.14E-07 |
| CENPH      | 5q13.2        | 0.277333 | 3.57E-08 | 5.19E-07 |
| CYS1       | 2p25.1        | -0.27732 | 3.57E-08 | 5.19E-07 |
| FOXK1      | 7p22.1        | 0.277127 | 3.65E-08 | 5.30E-07 |
| TBC1D19    | 4p15.2        | -0.27708 | 3.67E-08 | 5.33E-07 |
| PARPBP     | 12q23.2       | 0.277068 | 3.68E-08 | 5.33E-07 |
| PDCD11     | 10q24.33      | 0.277053 | 3.68E-08 | 5.34E-07 |
| PALMD      | 1p21.2        | -0.27703 | 3.70E-08 | 5.35E-07 |
| HAND2      | 4q34.1        | -0.27702 | 3.70E-08 | 5.35E-07 |
| EIF4G1     | 3q27.1        | 0.276975 | 3.72E-08 | 5.38E-07 |
| C3         | 19p13.3       | -0.27695 | 3.73E-08 | 5.39E-07 |
| NOP2       | 12p13.31      | 0.276949 | 3.73E-08 | 5.39E-07 |
| RMI1       | 9q21.32       | 0.276889 | 3.76E-08 | 5.42E-07 |
| CRELD1     | 3p25.3        | -0.27688 | 3.76E-08 | 5.42E-07 |

|          |                   |          |          |          |
|----------|-------------------|----------|----------|----------|
| CCDC184  | 12q13.11          | -0.27687 | 3.76E-08 | 5.42E-07 |
| FBXL19   | 16p11.2           | 0.276832 | 3.78E-08 | 5.44E-07 |
| ZNF436   | 1p36.12           | -0.27681 | 3.79E-08 | 5.46E-07 |
| CTSK     | 1q21.3            | -0.27675 | 3.82E-08 | 5.49E-07 |
| RTL5     | Xq13.1            | -0.27669 | 3.85E-08 | 5.53E-07 |
| EAPP     | 14q13.1           | -0.27664 | 3.87E-08 | 5.55E-07 |
| LRRC17   | 7q22.1            | -0.27662 | 3.88E-08 | 5.56E-07 |
| NLRC5    | 16q13             | 0.27659  | 3.89E-08 | 5.57E-07 |
| HYAL2    | 3p21.31           | -0.27659 | 3.89E-08 | 5.57E-07 |
| HSD17B6  | 12q13.3           | -0.27647 | 3.94E-08 | 5.65E-07 |
| BASP1    | 5p15.1            | -0.27639 | 3.98E-08 | 5.69E-07 |
| RAD18    | 3p25.3            | 0.276377 | 3.99E-08 | 5.70E-07 |
| ASIC3    | 7q36.1            | 0.27632  | 4.02E-08 | 5.74E-07 |
| ACP2     | 11p11.2 11p12-p11 | -0.27614 | 4.10E-08 | 5.86E-07 |
| UHRF1BP1 | 6p21.31           | 0.276124 | 4.11E-08 | 5.86E-07 |
| CDKN2C   | 1p32.3            | 0.275984 | 4.18E-08 | 5.95E-07 |
| HEY1     | 8q21.13           | -0.27598 | 4.18E-08 | 5.95E-07 |
| TSPAN9   | 12p13.33-p13.32   | -0.27585 | 4.24E-08 | 6.04E-07 |
| SRSF12   | 6q15              | -0.27571 | 4.31E-08 | 6.13E-07 |
| DACT3    | 19q13.32          | -0.2757  | 4.32E-08 | 6.14E-07 |
| CCDC71L  | 7q22.3            | -0.27562 | 4.36E-08 | 6.19E-07 |
| SMIM1    | 1p36.32           | -0.27557 | 4.38E-08 | 6.22E-07 |
| HTR2B    | 2q37.1            | -0.27555 | 4.39E-08 | 6.23E-07 |
| IGF1     | 12q23.2           | -0.27554 | 4.40E-08 | 6.23E-07 |
| AMH      | 19p13.3           | 0.27554  | 4.40E-08 | 6.23E-07 |
| MAB21L1  | 13q13.3           | -0.27543 | 4.45E-08 | 6.30E-07 |
| ARHGEF11 | 1q23.1            | 0.275432 | 4.45E-08 | 6.30E-07 |
| COL8A2   | 1p34.3            | -0.27532 | 4.51E-08 | 6.38E-07 |
| SRSF10   | 1p36.11           | 0.275317 | 4.51E-08 | 6.38E-07 |
| LMOD1    | 1q32.1            | -0.27531 | 4.52E-08 | 6.38E-07 |
| FABP4    | 8q21.13           | -0.27529 | 4.53E-08 | 6.38E-07 |
| PAK6     | 15q15.1           | 0.275286 | 4.53E-08 | 6.39E-07 |
| DIRC3    | 2q35              | -0.27519 | 4.58E-08 | 6.45E-07 |
| TNS4     | 17q21.2           | 0.275187 | 4.58E-08 | 6.45E-07 |
| C14ORF28 | 14q21.2           | -0.27513 | 4.61E-08 | 6.49E-07 |
| TSPYL5   | 8q22.1            | -0.27506 | 4.65E-08 | 6.54E-07 |
| SV2B     | 15q26.1           | -0.27504 | 4.66E-08 | 6.55E-07 |
| FGF7     | 15q21.2           | -0.27501 | 4.68E-08 | 6.56E-07 |
| TCEAL9   | Xq22.2            | -0.27501 | 4.68E-08 | 6.56E-07 |
| ZNF142   | 2q35              | 0.274983 | 4.69E-08 | 6.58E-07 |
| MOCS1    | 6p21.2            | -0.27493 | 4.72E-08 | 6.62E-07 |
| LETM1    | 4p16.3            | 0.274861 | 4.76E-08 | 6.66E-07 |
| ADCY6    | 12q13.12          | 0.274838 | 4.77E-08 | 6.68E-07 |
| LINGO2   | 9p21.2-p21.1      | -0.27474 | 4.83E-08 | 6.75E-07 |
| NFU1     | 2p13.3            | -0.27472 | 4.84E-08 | 6.76E-07 |
| APH1B    | 15q22.2           | -0.2747  | 4.85E-08 | 6.77E-07 |
| GNB4     | 3q26.33           | -0.2746  | 4.90E-08 | 6.84E-07 |
| SERPINF1 | 17p13.3           | -0.27456 | 4.93E-08 | 6.87E-07 |
| INTS1    | 7p22.3            | 0.274545 | 4.94E-08 | 6.88E-07 |
| DNM2     | 19p13.2           | 0.274517 | 4.96E-08 | 6.90E-07 |
| XPO5     | 6p21.1            | 0.274428 | 5.01E-08 | 6.96E-07 |
| SUSD4    | 1q41              | -0.27437 | 5.04E-08 | 7.00E-07 |
| C5ORF24  | 5q31.1            | -0.27432 | 5.07E-08 | 7.04E-07 |
| PLA1A    | 3q13.33           | -0.27432 | 5.07E-08 | 7.04E-07 |
| SGCD     | 5q33.2-q33.3      | -0.27431 | 5.07E-08 | 7.04E-07 |
| PCDH10   | 4q28.3            | -0.27428 | 5.09E-08 | 7.06E-07 |
| TUBG1    | 17q21.2           | 0.274276 | 5.10E-08 | 7.06E-07 |
| ZNF672   | 1q44              | 0.274181 | 5.15E-08 | 7.13E-07 |



|           |          |          |          |          |
|-----------|----------|----------|----------|----------|
| MDN1      | 6q15     | 0.274176 | 5.16E-08 | 7.13E-07 |
| CYP2D7    | 22q13.2  | 0.274121 | 5.19E-08 | 7.17E-07 |
| SALL2     | 14q11.2  | -0.27402 | 5.25E-08 | 7.25E-07 |
| ISCU      | 12q23.3  | -0.27397 | 5.28E-08 | 7.29E-07 |
| RIBC2     | 22q13.31 | 0.273879 | 5.34E-08 | 7.36E-07 |
| GLT8D1    | 3p21.1   | -0.27384 | 5.36E-08 | 7.39E-07 |
| ZNF362    | 1p35.1   | -0.27374 | 5.42E-08 | 7.47E-07 |
| ISLR2     | 15q24.1  | -0.27369 | 5.45E-08 | 7.50E-07 |
| SHISA2    | 13q12.13 | -0.27369 | 5.46E-08 | 7.50E-07 |
| ADPRM     | 17p13.1  | -0.27366 | 5.48E-08 | 7.53E-07 |
| TMEM169   | 2q35     | -0.27363 | 5.49E-08 | 7.54E-07 |
| ZNF335    | 20q13.12 | 0.273596 | 5.51E-08 | 7.57E-07 |
| ICAM2     | 17q23.3  | -0.2735  | 5.58E-08 | 7.65E-07 |
| SOS2      | 14q21.3  | -0.27343 | 5.62E-08 | 7.70E-07 |
| PAM       | 5q21.1   | -0.27343 | 5.62E-08 | 7.70E-07 |
| TRIM22    | 11p15.4  | -0.27339 | 5.65E-08 | 7.73E-07 |
| PIGQ      | 16p13.3  | 0.273358 | 5.67E-08 | 7.75E-07 |
| C3ORF18   | 3p21.31  | -0.27334 | 5.68E-08 | 7.77E-07 |
| KRTAP5-1  | 11p15.5  | 0.273197 | 5.77E-08 | 7.89E-07 |
| STK11     | 19p13.3  | 0.273181 | 5.79E-08 | 7.90E-07 |
| DLG5      | 10q22.3  | 0.273168 | 5.79E-08 | 7.90E-07 |
| HSD11B1   | 1q32.2   | -0.27317 | 5.80E-08 | 7.90E-07 |
| COMP      | 19p13.11 | -0.27315 | 5.81E-08 | 7.91E-07 |
| LRRN3     | 7q31.1   | -0.27312 | 5.83E-08 | 7.94E-07 |
| NOX4      | 11q14.3  | -0.27311 | 5.84E-08 | 7.94E-07 |
| TM2D3     | 15q26.3  | -0.27296 | 5.94E-08 | 8.07E-07 |
| CRYBB1    | 22q12.1  | -0.27291 | 5.97E-08 | 8.11E-07 |
| TBC1D9    | 4q31.21  | -0.27289 | 5.98E-08 | 8.13E-07 |
| NDUFS2    | 1q23.3   | 0.272863 | 6.00E-08 | 8.14E-07 |
| JRK       | 8q24.3   | 0.272811 | 6.04E-08 | 8.19E-07 |
| C8ORF34   | 8q13.2   | -0.2728  | 6.04E-08 | 8.19E-07 |
| PLA2G4C   | 19q13.33 | -0.2728  | 6.05E-08 | 8.19E-07 |
| FLRT2     | 14q31.3  | -0.27274 | 6.09E-08 | 8.24E-07 |
| NDFIP1    | 5q31.3   | -0.27272 | 6.10E-08 | 8.25E-07 |
| NUP62     | 19q13.33 | 0.272683 | 6.13E-08 | 8.28E-07 |
| METTL24   | 6q21     | -0.27264 | 6.16E-08 | 8.32E-07 |
| TRIM6     | 11p15.4  | -0.27262 | 6.17E-08 | 8.33E-07 |
| EDA2R     | Xq12     | -0.2726  | 6.19E-08 | 8.34E-07 |
| GYPC      | 2q14.3   | -0.27259 | 6.20E-08 | 8.35E-07 |
| LINC00482 | 17q25.3  | 0.272559 | 6.22E-08 | 8.37E-07 |
| ITM2A     | Xq21.1   | -0.27254 | 6.23E-08 | 8.38E-07 |
| TMEM182   | 2q12.1   | -0.27251 | 6.25E-08 | 8.41E-07 |
| SHMT2     | 12q13.3  | 0.272487 | 6.27E-08 | 8.42E-07 |
| ANKH      | 5p15.2   | -0.27242 | 6.32E-08 | 8.48E-07 |
| CCL14     | 17q12    | -0.27242 | 6.32E-08 | 8.48E-07 |
| ZC2HC1A   | 8q21.13  | -0.27227 | 6.43E-08 | 8.62E-07 |
| GNPTG     | 16p13.3  | -0.27225 | 6.45E-08 | 8.64E-07 |
| MTPAP     | 10p11.23 | 0.272209 | 6.47E-08 | 8.67E-07 |
| HADHB     | 2p23.3   | -0.27218 | 6.49E-08 | 8.69E-07 |
| SESN3     | 11q21    | -0.27217 | 6.50E-08 | 8.70E-07 |
| GPRASP2   | Xq22.1   | -0.27211 | 6.54E-08 | 8.75E-07 |
| AOAH      | 7p14.2   | -0.27209 | 6.56E-08 | 8.77E-07 |
| CLIC2     | Xq28     | -0.27204 | 6.60E-08 | 8.81E-07 |
| AKAP12    | 6q25.1   | -0.27197 | 6.65E-08 | 8.87E-07 |
| GABARAPL3 | 15q26.1  | -0.27196 | 6.66E-08 | 8.88E-07 |
| SKIV2L    | 6p21.33  | 0.27195  | 6.67E-08 | 8.88E-07 |
| CAV2      | 7q31.2   | -0.27192 | 6.69E-08 | 8.91E-07 |
| TIMP1     | Xp11.3   | -0.27191 | 6.69E-08 | 8.91E-07 |

|          |          |          |          |          |
|----------|----------|----------|----------|----------|
| MRS2     | 6p22.3   | 0.271898 | 6.71E-08 | 8.92E-07 |
| MAP2     | 2q34     | -0.27185 | 6.74E-08 | 8.96E-07 |
| CCDC126  | 7p15.3   | -0.27177 | 6.80E-08 | 9.04E-07 |
| SNHG10   | 14q32.13 | 0.271698 | 6.86E-08 | 9.11E-07 |
| SETDB1   | 1q21.3   | 0.271598 | 6.94E-08 | 9.21E-07 |
| CSNK1G2  | 19p13.3  | 0.271587 | 6.95E-08 | 9.21E-07 |
| SLFNL1   | 1p34.2   | 0.271506 | 7.02E-08 | 9.29E-07 |
| SRRM1    | 1p36.11  | 0.271456 | 7.06E-08 | 9.34E-07 |
| C21ORF91 | 21q21.1  | -0.27137 | 7.12E-08 | 9.42E-07 |
| BEX4     | Xq22.1   | -0.27132 | 7.17E-08 | 9.47E-07 |
| NSMCE3   | 15q13.1  | -0.27126 | 7.22E-08 | 9.54E-07 |
| C7       | 5p13.1   | -0.27124 | 7.24E-08 | 9.55E-07 |
| C18ORF32 | 18q21.1  | -0.27123 | 7.24E-08 | 9.55E-07 |
| FAM43B   | 1p36.12  | -0.27121 | 7.26E-08 | 9.57E-07 |
| POU5F1   | 6p21.33  | 0.271193 | 7.27E-08 | 9.58E-07 |
| TIMP2    | 17q25.3  | -0.27117 | 7.29E-08 | 9.60E-07 |
| RFC3     | 13q13.2  | 0.271071 | 7.38E-08 | 9.71E-07 |
| SMO      | 7q32.1   | -0.27106 | 7.39E-08 | 9.72E-07 |
| NRK      | Xq22.3   | -0.27103 | 7.41E-08 | 9.74E-07 |
| CHMP3    | 2p11.2   | -0.27093 | 7.50E-08 | 9.84E-07 |
| PTGER3   | 1p31.1   | -0.27092 | 7.50E-08 | 9.85E-07 |
| RASSF1   | 3p21.31  | 0.270898 | 7.52E-08 | 9.87E-07 |
| AP3D1    | 19p13.3  | 0.270891 | 7.53E-08 | 9.87E-07 |
| PNMA8A   | 19q13.32 | -0.27086 | 7.55E-08 | 9.89E-07 |
| MAT2B    | 5q34     | -0.27086 | 7.56E-08 | 9.89E-07 |
| OGFOD2   | 12q24.31 | 0.270855 | 7.56E-08 | 9.89E-07 |
| ENTHD1   | 22q13.1  | -0.27082 | 7.59E-08 | 9.93E-07 |
| SPSB1    | 1p36.22  | -0.27074 | 7.66E-08 | 1.00E-06 |
| PRR14L   | 22q12.2  | 0.270741 | 7.66E-08 | 1.00E-06 |
| SPARC    | 5q33.1   | -0.27068 | 7.72E-08 | 1.01E-06 |
| ANTXR1   | 2p13.3   | -0.27064 | 7.75E-08 | 1.01E-06 |
| ZNF843   | 16p11.2  | -0.27064 | 7.75E-08 | 1.01E-06 |
| NACAD    | 7p13     | -0.27062 | 7.77E-08 | 1.01E-06 |
| TNFSF18  | 1q25.1   | -0.27057 | 7.81E-08 | 1.02E-06 |
| PCDH7    | 4p15.1   | -0.27055 | 7.83E-08 | 1.02E-06 |
| SPOCK3   | 4q32.3   | -0.27053 | 7.85E-08 | 1.02E-06 |
| FGFR1OP  | 6q27     | 0.27049  | 7.88E-08 | 1.02E-06 |
| CCT3     | 1q22     | 0.270485 | 7.89E-08 | 1.02E-06 |
| IARS2    | 1q41     | 0.270476 | 7.90E-08 | 1.02E-06 |
| SNX6     | 14q13.1  | -0.27046 | 7.91E-08 | 1.03E-06 |
| CLDN11   | 3q26.2   | -0.27045 | 7.92E-08 | 1.03E-06 |
| MED22    | 9q34.2   | 0.270434 | 7.93E-08 | 1.03E-06 |
| TMEM50A  | 1p36.11  | -0.27039 | 7.98E-08 | 1.03E-06 |
| KLHDC2   | 14q21.3  | -0.27039 | 7.98E-08 | 1.03E-06 |
| DTWD1    | 15q21.2  | -0.27038 | 7.99E-08 | 1.03E-06 |
| CYP3A7   | 7q22.1   | -0.27036 | 8.00E-08 | 1.03E-06 |
| TBL3     | 16p13.3  | 0.27032  | 8.04E-08 | 1.04E-06 |
| MVD      | 16q24.2  | 0.270318 | 8.04E-08 | 1.04E-06 |
| TSC1     | 9q34.13  | 0.270216 | 8.13E-08 | 1.05E-06 |
| GON4L    | 1q22     | 0.270211 | 8.14E-08 | 1.05E-06 |
| GINS4    | 8p11.21  | 0.270205 | 8.14E-08 | 1.05E-06 |
| ADAMTS13 | 9q34.2   | 0.270115 | 8.23E-08 | 1.06E-06 |
| LRRN2    | 1q32.1   | -0.27003 | 8.31E-08 | 1.07E-06 |
| PTN      | 7q33     | -0.27003 | 8.31E-08 | 1.07E-06 |
| CLK2P1   | 7p15.3   | 0.269974 | 8.36E-08 | 1.07E-06 |
| WIPF1    | 2q31.1   | -0.26994 | 8.39E-08 | 1.08E-06 |
| TARDBP   | 1p36.22  | 0.269889 | 8.44E-08 | 1.08E-06 |
| SLF1     | 5q15     | 0.269848 | 8.48E-08 | 1.09E-06 |

|            |              |          |          |          |
|------------|--------------|----------|----------|----------|
| HERPUD1    | 16q13        | -0.26983 | 8.50E-08 | 1.09E-06 |
| ADD2       | 2p13.3       | -0.26975 | 8.58E-08 | 1.10E-06 |
| TIMP3      | 22q12.3      | -0.26974 | 8.58E-08 | 1.10E-06 |
| ITPK1-AS1  | 14q32.12     | 0.269736 | 8.59E-08 | 1.10E-06 |
| BMS1P2     | 10q11.22     | 0.269732 | 8.60E-08 | 1.10E-06 |
| SLC16A4    | 1p13.3       | -0.26969 | 8.63E-08 | 1.10E-06 |
| FGF13      | Xq26.3-q27.1 | -0.26969 | 8.63E-08 | 1.10E-06 |
| CORO2B     | 15q23        | -0.26968 | 8.65E-08 | 1.10E-06 |
| SPART      | 13q13.3      | -0.26957 | 8.75E-08 | 1.11E-06 |
| LOC729603  | 6q25.3       | 0.269519 | 8.81E-08 | 1.12E-06 |
| NSUN2      | 5p15.31      | 0.269509 | 8.82E-08 | 1.12E-06 |
| C19ORF12   | 19q12        | -0.26944 | 8.89E-08 | 1.13E-06 |
| PURG       | 8p12         | -0.26933 | 9.00E-08 | 1.14E-06 |
| ALOX5AP    | 13q12.3      | -0.26924 | 9.09E-08 | 1.15E-06 |
| PCMTD1     | 8q11.23      | -0.26909 | 9.25E-08 | 1.17E-06 |
| NOXA1      | 9q34.3       | 0.26905  | 9.29E-08 | 1.18E-06 |
| TUBGCP2    | 10q26.3      | 0.269046 | 9.29E-08 | 1.18E-06 |
| LDOC1      | Xq27.1       | -0.26902 | 9.32E-08 | 1.18E-06 |
| PRODH      | 22q11.21     | 0.268912 | 9.44E-08 | 1.19E-06 |
| GCK        | 7p13         | -0.26885 | 9.50E-08 | 1.20E-06 |
| INMT       | 7p14.3       | -0.26885 | 9.51E-08 | 1.20E-06 |
| STX10      | 19p13.13     | 0.268758 | 9.60E-08 | 1.21E-06 |
| STAG3L3    | 7q11.23      | 0.268734 | 9.63E-08 | 1.22E-06 |
| DHRS3      | 1p36.21      | -0.26872 | 9.65E-08 | 1.22E-06 |
| COMMD1     | 2p15         | -0.26869 | 9.68E-08 | 1.22E-06 |
| SCRG1      | 4q34.1       | -0.26867 | 9.70E-08 | 1.22E-06 |
| GIGYF1     | 7q22.1       | 0.268651 | 9.72E-08 | 1.22E-06 |
| SULT1A3    | 16p11.2      | 0.268617 | 9.76E-08 | 1.23E-06 |
| SMARCA1    | Xq25-q26.1   | -0.26846 | 9.94E-08 | 1.25E-06 |
| SETD1A     | 16p11.2      | 0.268429 | 9.97E-08 | 1.25E-06 |
| DPP9       | 19p13.3      | 0.268417 | 9.98E-08 | 1.25E-06 |
| SNORD1C    | 17q25.1      | 0.268408 | 9.99E-08 | 1.25E-06 |
| FBRSL1     | 12q24.33     | 0.268391 | 1.00E-07 | 1.26E-06 |
| CGNL1      | 15q21.3      | -0.26839 | 1.00E-07 | 1.26E-06 |
| AASDHPPT   | 11q22.3      | -0.26832 | 1.01E-07 | 1.26E-06 |
| CRAMP1     | 16p13.3      | 0.268321 | 1.01E-07 | 1.26E-06 |
| AIF1       | 6p21.33      | -0.26829 | 1.01E-07 | 1.27E-06 |
| SULF1      | 8q13.2-q13.3 | -0.26827 | 1.02E-07 | 1.27E-06 |
| ZFAND6     | 15q25.1      | -0.26825 | 1.02E-07 | 1.27E-06 |
| ZCWPW2     | 3p24.1       | -0.26824 | 1.02E-07 | 1.27E-06 |
| ZNF781     | 19q13.12     | -0.26822 | 1.02E-07 | 1.28E-06 |
| ACSS3      | 12q21.31     | -0.26812 | 1.03E-07 | 1.29E-06 |
| POGLUT2    | 13q33.1      | -0.26809 | 1.04E-07 | 1.29E-06 |
| LMNA       | 1q22         | 0.268074 | 1.04E-07 | 1.29E-06 |
| SNX17      | 2p23.3       | -0.26801 | 1.05E-07 | 1.30E-06 |
| RND2       | 17q21.31     | -0.26796 | 1.05E-07 | 1.31E-06 |
| SMC1A      | Xp11.22      | 0.267894 | 1.06E-07 | 1.32E-06 |
| PPP1R21    | 2p16.3       | -0.26787 | 1.06E-07 | 1.32E-06 |
| TYRP1      | 9p23         | -0.26786 | 1.06E-07 | 1.32E-06 |
| PPM1G      | 2p23.3       | 0.26785  | 1.06E-07 | 1.32E-06 |
| TGFBR1     | 9q22.33      | -0.26775 | 1.08E-07 | 1.34E-06 |
| DDX54      | 12q24.13     | 0.267746 | 1.08E-07 | 1.34E-06 |
| ANKRD11    | 16q24.3      | 0.26768  | 1.09E-07 | 1.34E-06 |
| PTGES2-AS1 | 9q34.11      | 0.267594 | 1.10E-07 | 1.36E-06 |
| ZBTB18     | 1q44         | 0.267558 | 1.10E-07 | 1.36E-06 |
| TRIM10     | 6p22.1       | 0.267523 | 1.10E-07 | 1.37E-06 |
| GDPD1      | 17q22        | -0.26745 | 1.11E-07 | 1.38E-06 |
| DLG2       | 11q14.1      | -0.26742 | 1.12E-07 | 1.38E-06 |

|            |            |          |          |          |
|------------|------------|----------|----------|----------|
| TCF7L1     | 2p11.2     | -0.26742 | 1.12E-07 | 1.38E-06 |
| MMP15      | 16q21      | 0.267373 | 1.12E-07 | 1.39E-06 |
| PABPN1     | 14q11.2    | 0.267368 | 1.12E-07 | 1.39E-06 |
| GPT2       | 16q11.2    | 0.267315 | 1.13E-07 | 1.39E-06 |
| DCLRE1B    | 1p13.2     | 0.267309 | 1.13E-07 | 1.39E-06 |
| COG4       | 16q22.1    | 0.267301 | 1.13E-07 | 1.39E-06 |
| PTGES2     | 9q34.11    | 0.267288 | 1.13E-07 | 1.39E-06 |
| TRIM28     | 19q13.43   | 0.267287 | 1.13E-07 | 1.39E-06 |
| UBLCP1     | 5q33.3     | -0.26727 | 1.14E-07 | 1.40E-06 |
| DKK3       | 11p15.3    | -0.2672  | 1.15E-07 | 1.41E-06 |
| UBTD2      | 5q35.1     | -0.26712 | 1.16E-07 | 1.42E-06 |
| TASOR2     | 10p15.1    | 0.267085 | 1.16E-07 | 1.42E-06 |
| LINC01089  | 12q24.31   | 0.26705  | 1.17E-07 | 1.43E-06 |
| MSANTD4    | 11q22.3    | -0.26701 | 1.17E-07 | 1.43E-06 |
| ARGLU1     | 13q33.3    | 0.267003 | 1.17E-07 | 1.43E-06 |
| FAM228B    | 2p23.3     | -0.26693 | 1.18E-07 | 1.44E-06 |
| EXT2       | 11p11.2    | -0.26691 | 1.18E-07 | 1.45E-06 |
| DUSP5P1    | 1q42.13    | 0.266857 | 1.19E-07 | 1.45E-06 |
| TMEM255A   | Xq24       | -0.26686 | 1.19E-07 | 1.45E-06 |
| HSPB7      | 1p36.13    | -0.26686 | 1.19E-07 | 1.45E-06 |
| CDO1       | 5q22.3     | -0.26683 | 1.19E-07 | 1.46E-06 |
| CDK14      | 7q21.13    | -0.26682 | 1.20E-07 | 1.46E-06 |
| NEFH       | 22q12.2    | -0.2668  | 1.20E-07 | 1.46E-06 |
| IGFBP5     | 2q35       | -0.26671 | 1.21E-07 | 1.47E-06 |
| SLIT2      | 4p15.31    | -0.26669 | 1.21E-07 | 1.48E-06 |
| TMEM200C   | 18p11.31   | -0.26661 | 1.22E-07 | 1.49E-06 |
| AKT2       | 19q13.2    | 0.266496 | 1.24E-07 | 1.51E-06 |
| GRK2       | 11q13.2    | 0.266476 | 1.24E-07 | 1.51E-06 |
| RAD54B     | 8q22.1     | 0.266463 | 1.24E-07 | 1.51E-06 |
| CFL2       | 14q13.1    | -0.26642 | 1.25E-07 | 1.52E-06 |
| IFRD2      | 3p21.31    | 0.26638  | 1.26E-07 | 1.52E-06 |
| GAS2L3     | 12q23.1    | 0.266298 | 1.27E-07 | 1.54E-06 |
| LAMTOR3    | 4q23       | -0.26629 | 1.27E-07 | 1.54E-06 |
| GHR        | 5p13.1-p12 | -0.26623 | 1.28E-07 | 1.55E-06 |
| DFFB       | 1p36.32    | 0.26622  | 1.28E-07 | 1.55E-06 |
| APOBEC3G   | 22q13.1    | -0.26615 | 1.29E-07 | 1.56E-06 |
| NRADDP     | 3p21.31    | 0.266148 | 1.29E-07 | 1.56E-06 |
| MAMDC4     | 9q34.3     | 0.266094 | 1.30E-07 | 1.57E-06 |
| FMO2       | 1q24.3     | -0.26606 | 1.30E-07 | 1.57E-06 |
| CSGALNACT1 | 8p21.3     | -0.26604 | 1.31E-07 | 1.57E-06 |
| THBS4      | 5q14.1     | -0.26597 | 1.32E-07 | 1.59E-06 |
| OSBPL9     | 1p32.3     | -0.26596 | 1.32E-07 | 1.59E-06 |
| KLHL38     | 8q24.13    | -0.26593 | 1.32E-07 | 1.59E-06 |
| PCDHB12    | 5q31.3     | -0.26593 | 1.32E-07 | 1.59E-06 |
| LINC00235  | 16p13.3    | 0.265915 | 1.32E-07 | 1.59E-06 |
| HELQ       | 4q21.23    | -0.26591 | 1.32E-07 | 1.59E-06 |
| A2M        | 12p13.31   | -0.26582 | 1.34E-07 | 1.61E-06 |
| HNRNPF     | 10q11.21   | 0.265745 | 1.35E-07 | 1.62E-06 |
| TJP2       | 9q21.11    | 0.265731 | 1.35E-07 | 1.62E-06 |
| NEXMIF     | Xq13.3     | -0.26564 | 1.37E-07 | 1.64E-06 |
| GPX8       | 5q11.2     | -0.26564 | 1.37E-07 | 1.64E-06 |
| LINC00922  | 16q21      | -0.26562 | 1.37E-07 | 1.64E-06 |
| RCN1       | 11p13      | -0.26561 | 1.37E-07 | 1.64E-06 |
| CNIH3      | 1q42.12    | -0.26559 | 1.37E-07 | 1.64E-06 |
| PHYHD1     | 9q34.11    | -0.26555 | 1.38E-07 | 1.65E-06 |
| C2ORF74    | 2p15       | -0.26551 | 1.38E-07 | 1.65E-06 |
| CTSB       | 8p23.1     | -0.26549 | 1.39E-07 | 1.66E-06 |
| FBLN1      | 22q13.31   | -0.26543 | 1.40E-07 | 1.67E-06 |

|            |              |          |          |          |
|------------|--------------|----------|----------|----------|
| JAZF1      | 7p15.2-p15.1 | -0.26542 | 1.40E-07 | 1.67E-06 |
| CEACAM21   | 19q13.2      | -0.2654  | 1.40E-07 | 1.67E-06 |
| SYMPK      | 19q13.32     | 0.265325 | 1.41E-07 | 1.68E-06 |
| BICC1      | 10q21.1      | -0.26532 | 1.42E-07 | 1.68E-06 |
| METTL9     | 16p12.2      | -0.26531 | 1.42E-07 | 1.68E-06 |
| EFR3A      | 8q24.22      | -0.26523 | 1.43E-07 | 1.70E-06 |
| LINC00893  | Xq28         | 0.265071 | 1.46E-07 | 1.73E-06 |
| RAB31      | 18p11.22     | -0.26506 | 1.46E-07 | 1.73E-06 |
| RFC2       | 7q11.23      | 0.265061 | 1.46E-07 | 1.73E-06 |
| XG         | Xp22.33      | -0.26505 | 1.46E-07 | 1.73E-06 |
| ZBTB43     | 9q33.3       | 0.265048 | 1.46E-07 | 1.73E-06 |
| CDK17      | 12q23.1      | -0.26504 | 1.46E-07 | 1.73E-06 |
| RELT       | 11q13.4      | 0.265018 | 1.46E-07 | 1.73E-06 |
| HLA-DPB1   | 6p21.32      | -0.26501 | 1.46E-07 | 1.73E-06 |
| ZNF501     | 3p21.31      | -0.26484 | 1.49E-07 | 1.76E-06 |
| ATRIP      | 3p21.31      | 0.264841 | 1.49E-07 | 1.76E-06 |
| ZNF667     | 19q13.43     | -0.26483 | 1.50E-07 | 1.77E-06 |
| AOC3       | 17q21.31     | -0.26479 | 1.50E-07 | 1.77E-06 |
| KIF17      | 1p36.12      | -0.26473 | 1.51E-07 | 1.78E-06 |
| MAP3K4     | 6q26         | 0.264687 | 1.52E-07 | 1.79E-06 |
| ING5       | 2q37.3       | 0.264613 | 1.53E-07 | 1.80E-06 |
| DGKD       | 2q37.1       | 0.264601 | 1.53E-07 | 1.81E-06 |
| PGM5       | 9q21.11      | -0.26452 | 1.55E-07 | 1.82E-06 |
| ST6GALNAC3 | 1p31.1       | -0.2644  | 1.57E-07 | 1.84E-06 |
| PDSS1      | 10p12.1      | 0.264281 | 1.59E-07 | 1.87E-06 |
| LANCL1     | 2q34         | -0.26424 | 1.60E-07 | 1.88E-06 |
| RABL6      | 9q34.3       | 0.264178 | 1.61E-07 | 1.89E-06 |
| IL34       | 16q22.1      | -0.26418 | 1.61E-07 | 1.89E-06 |
| GTPBP4     | 10p15.3      | 0.264101 | 1.62E-07 | 1.90E-06 |
| APBB1      | 11p15.4      | -0.26396 | 1.65E-07 | 1.93E-06 |
| SRSF8      | 11q21        | -0.26373 | 1.69E-07 | 1.98E-06 |
| FLVCR1     | 1q32.3       | 0.263718 | 1.69E-07 | 1.98E-06 |
| RCC2       | 1p36.13      | 0.263709 | 1.69E-07 | 1.98E-06 |
| ZNF542P    | 19q13.43     | -0.26369 | 1.70E-07 | 1.98E-06 |
| ACSF2      | 17q21.33     | -0.26366 | 1.70E-07 | 1.99E-06 |
| ZFYVE1     | 14q24.2      | -0.26365 | 1.71E-07 | 1.99E-06 |
| MTFR1L     | 1p36.11      | -0.26364 | 1.71E-07 | 1.99E-06 |
| PPP5C      | 19q13.32     | 0.26355  | 1.72E-07 | 2.01E-06 |
| GNG10      | 9q31.3       | -0.26348 | 1.74E-07 | 2.03E-06 |
| HSPBP1     | 19q13.42     | 0.263455 | 1.74E-07 | 2.03E-06 |
| STX5       | 11q12.3      | -0.2634  | 1.75E-07 | 2.04E-06 |
| HIRA       | 22q11.21     | 0.263359 | 1.76E-07 | 2.05E-06 |
| FGFR1      | 8p11.23      | -0.26334 | 1.76E-07 | 2.05E-06 |
| TWSG1      | 18p11.22     | -0.26328 | 1.78E-07 | 2.07E-06 |
| POLE2      | 14q21.3      | 0.263244 | 1.78E-07 | 2.07E-06 |
| SMPD1      | 11p15.4      | -0.26322 | 1.79E-07 | 2.08E-06 |
| HHIP       | 4q31.21      | -0.26316 | 1.80E-07 | 2.09E-06 |
| ADGRL4     | 1p31.1       | -0.26315 | 1.80E-07 | 2.09E-06 |
| MFRP       | 11q23.3      | -0.26314 | 1.80E-07 | 2.09E-06 |
| SEMA3D     | 7q21.11      | -0.26309 | 1.81E-07 | 2.10E-06 |
| DPH3       | 3p25.1       | -0.26307 | 1.82E-07 | 2.10E-06 |
| GTF2B      | 1p22.2       | -0.26305 | 1.82E-07 | 2.11E-06 |
| PDZRN4     | 12q12        | -0.26302 | 1.83E-07 | 2.12E-06 |
| C8ORF48    | 8p22         | -0.26299 | 1.84E-07 | 2.12E-06 |
| E4F1       | 16p13.3      | 0.262947 | 1.84E-07 | 2.13E-06 |
| PRND       | 20p13        | -0.26286 | 1.86E-07 | 2.15E-06 |
| MAPK10     | 4q21.3       | -0.2628  | 1.87E-07 | 2.16E-06 |
| RGS5       | 1q23.3       | -0.26271 | 1.89E-07 | 2.18E-06 |

|           |              |          |          |          |
|-----------|--------------|----------|----------|----------|
| C9ORF129  | 9q22.31      | 0.262688 | 1.90E-07 | 2.19E-06 |
| RUVBL2    | 19q13.33     | 0.262517 | 1.93E-07 | 2.23E-06 |
| KCNMB2    | 3q26.32      | -0.26241 | 1.96E-07 | 2.25E-06 |
| PGAM5     | 12q24.33     | 0.262408 | 1.96E-07 | 2.25E-06 |
| ATP1A2    | 1q23.2       | -0.26238 | 1.96E-07 | 2.26E-06 |
| SNAP91    | 6q14.2       | -0.26236 | 1.97E-07 | 2.26E-06 |
| BTNL9     | 5q35.3       | 0.262363 | 1.97E-07 | 2.26E-06 |
| SYNPO2    | 4q26         | -0.26234 | 1.97E-07 | 2.26E-06 |
| STX6      | 1q25.3       | 0.262343 | 1.97E-07 | 2.26E-06 |
| CYP1B1    | 2p22.2       | -0.2623  | 1.98E-07 | 2.27E-06 |
| NCKAP5L   | 12q13.12     | -0.26227 | 1.99E-07 | 2.28E-06 |
| ZNF853    | 7p22.1       | -0.26226 | 1.99E-07 | 2.28E-06 |
| CACTIN    | 19p13.3      | 0.262198 | 2.00E-07 | 2.29E-06 |
| DIRAS2    | 9q22.2       | -0.26211 | 2.02E-07 | 2.31E-06 |
| SNHG20    | 17q25.2      | 0.262084 | 2.03E-07 | 2.32E-06 |
| LOC646471 | 1p36.11      | 0.262033 | 2.04E-07 | 2.33E-06 |
| NPR3      | 5p13.3       | -0.26197 | 2.05E-07 | 2.34E-06 |
| XPNPEP1   | 10q25.1      | 0.261972 | 2.05E-07 | 2.34E-06 |
| NTRK3     | 15q25.3      | -0.26195 | 2.06E-07 | 2.35E-06 |
| MORF4L1   | 15q25.1      | -0.26193 | 2.06E-07 | 2.35E-06 |
| TBC1D31   | 8q24.13      | 0.261835 | 2.09E-07 | 2.38E-06 |
| GPN1      | 2p23.3       | -0.2618  | 2.09E-07 | 2.38E-06 |
| EFEMP2    | 11q13.1      | -0.26172 | 2.11E-07 | 2.40E-06 |
| TRIM23    | 5q12.3       | -0.26171 | 2.11E-07 | 2.40E-06 |
| RGS7BP    | 5q12.3       | -0.26165 | 2.13E-07 | 2.42E-06 |
| NOLC1     | 10q24.32     | 0.261627 | 2.13E-07 | 2.42E-06 |
| TBC1D23   | 3q12.1-q12.2 | -0.26155 | 2.15E-07 | 2.44E-06 |
| TMEM87B   | 2q13         | -0.2615  | 2.16E-07 | 2.45E-06 |
| PLCL1     | 2q33.1       | -0.26148 | 2.17E-07 | 2.46E-06 |
| SRSF7     | 2p22.1       | 0.261419 | 2.18E-07 | 2.47E-06 |
| MRAS      | 3q22.3       | -0.26133 | 2.20E-07 | 2.50E-06 |
| DSCC1     | 8q24.12      | 0.261329 | 2.20E-07 | 2.50E-06 |
| SYNGR1    | 22q13.1      | -0.26128 | 2.22E-07 | 2.51E-06 |
| RCBTB2    | 13q14.2      | -0.26126 | 2.22E-07 | 2.51E-06 |
| HP1BP3    | 1p36.12      | 0.26126  | 2.22E-07 | 2.51E-06 |
| TMEM128   | 4p16.3       | -0.26125 | 2.22E-07 | 2.51E-06 |
| PALM      | 19p13.3      | -0.26118 | 2.24E-07 | 2.53E-06 |
| NR3C1     | 5q31.3       | -0.26115 | 2.25E-07 | 2.54E-06 |
| MFAP4     | 17p11.2      | -0.26104 | 2.27E-07 | 2.57E-06 |
| PLA2G15   | 16q22.1      | -0.26096 | 2.30E-07 | 2.59E-06 |
| TMEM150A  | 2p11.2       | -0.26093 | 2.30E-07 | 2.59E-06 |
| B4GALNT1  | 12q13.3      | -0.26089 | 2.31E-07 | 2.60E-06 |
| PPEF1     | Xp22.13      | -0.26089 | 2.31E-07 | 2.60E-06 |
| SYNPO     | 5q33.1       | -0.26089 | 2.31E-07 | 2.60E-06 |
| RGL1      | 1q25.3       | -0.26083 | 2.33E-07 | 2.62E-06 |
| NR2F6     | 19p13.11     | 0.26077  | 2.34E-07 | 2.63E-06 |
| STAU2     | 8q21.11      | -0.26074 | 2.35E-07 | 2.64E-06 |
| TNFRSF25  | 1p36.31      | 0.260739 | 2.35E-07 | 2.64E-06 |
| MARCKS    | 6q21         | -0.26073 | 2.35E-07 | 2.64E-06 |
| CCL2      | 17q12        | -0.26069 | 2.36E-07 | 2.65E-06 |
| SOX4      | 6p22.3       | -0.26068 | 2.37E-07 | 2.65E-06 |
| ABAT      | 16p13.2      | -0.26063 | 2.38E-07 | 2.67E-06 |
| NECAP2    | 1p36.13      | -0.2606  | 2.39E-07 | 2.67E-06 |
| PCDHB7    | 5q31.3       | -0.26059 | 2.39E-07 | 2.67E-06 |
| PNISR     | 6q16.2       | 0.260544 | 2.40E-07 | 2.69E-06 |
| RRP1      | 21q22.3      | 0.260525 | 2.41E-07 | 2.69E-06 |
| PFKP      | 10p15.2      | 0.260502 | 2.41E-07 | 2.70E-06 |
| SNX18     | 5q11.2       | -0.26044 | 2.43E-07 | 2.71E-06 |

|            |                 |          |          |          |
|------------|-----------------|----------|----------|----------|
| MYOZ1      | 10q22.2         | -0.26042 | 2.44E-07 | 2.72E-06 |
| GPR34      | Xp11.4          | -0.26042 | 2.44E-07 | 2.72E-06 |
| P2RY11     | 19p13.2         | 0.260258 | 2.48E-07 | 2.76E-06 |
| WNT8B      | 10q24.31        | 0.260241 | 2.48E-07 | 2.77E-06 |
| DUBR       | 3q13.12         | -0.26022 | 2.49E-07 | 2.77E-06 |
| SELENOT    | 3q25.1          | -0.2602  | 2.50E-07 | 2.78E-06 |
| UBE2Q2P2   | 15q25.2         | 0.260185 | 2.50E-07 | 2.78E-06 |
| MBD3       | 19p13.3         | 0.26013  | 2.52E-07 | 2.79E-06 |
| UBXN6      | 19p13.3         | -0.2601  | 2.52E-07 | 2.80E-06 |
| EBAG9      | 8q23.2          | -0.26006 | 2.53E-07 | 2.81E-06 |
| DHX34      | 19q13.32        | 0.260003 | 2.55E-07 | 2.83E-06 |
| DNAJB5     | 9p13.3          | -0.26    | 2.55E-07 | 2.83E-06 |
| WNT3       | 17q21.31-q21.32 | 0.259994 | 2.55E-07 | 2.83E-06 |
| ZC3H4      | 19q13.32        | 0.259992 | 2.55E-07 | 2.83E-06 |
| CTHRC1     | 8q22.3          | -0.25995 | 2.56E-07 | 2.84E-06 |
| ING4       | 12p13.31        | -0.25995 | 2.57E-07 | 2.84E-06 |
| STRN4      | 19q13.32        | 0.259938 | 2.57E-07 | 2.84E-06 |
| KCNT2      | 1q31.3          | -0.2599  | 2.58E-07 | 2.85E-06 |
| CASP8AP2   | 6q15            | 0.259893 | 2.58E-07 | 2.85E-06 |
| LIMS2      | 2q14.3          | -0.25988 | 2.59E-07 | 2.85E-06 |
| CAMSAP1    | 9q34.3          | 0.259879 | 2.59E-07 | 2.85E-06 |
| TBCEL      | 11q23.3         | -0.25986 | 2.59E-07 | 2.86E-06 |
| DENND5A    | 11p15.4         | -0.25985 | 2.59E-07 | 2.86E-06 |
| RSRP1      | 1p36.11         | 0.259844 | 2.60E-07 | 2.86E-06 |
| MYCT1      | 6q25.2          | -0.25981 | 2.61E-07 | 2.87E-06 |
| NR2F1-AS1  | 5q15            | -0.25975 | 2.62E-07 | 2.88E-06 |
| HNRNPD     | 4q21.22         | 0.25969  | 2.64E-07 | 2.90E-06 |
| SH3BGR     | 21q22.2         | -0.25963 | 2.66E-07 | 2.92E-06 |
| HMGX2      | 1p36.11         | 0.259549 | 2.68E-07 | 2.94E-06 |
| DVL1       | 1p36.33         | 0.259507 | 2.69E-07 | 2.95E-06 |
| FAM124B    | 2q36.2          | -0.25943 | 2.72E-07 | 2.98E-06 |
| ZFX4       | 8q21.13         | -0.25941 | 2.72E-07 | 2.98E-06 |
| PPP2R3C    | 14q13.2         | -0.2594  | 2.72E-07 | 2.98E-06 |
| THSD7B     | 2q22.1          | -0.25938 | 2.73E-07 | 2.99E-06 |
| S1PR1      | 1p21.2          | -0.25937 | 2.73E-07 | 2.99E-06 |
| RAMP2      | 17q21.2         | -0.25929 | 2.76E-07 | 3.02E-06 |
| PDLIM4     | 5q31.1          | -0.25926 | 2.77E-07 | 3.02E-06 |
| CEP112     | 17q24.1         | -0.25923 | 2.78E-07 | 3.03E-06 |
| IFT20      | 17q11.2         | -0.25919 | 2.79E-07 | 3.04E-06 |
| STK38L     | 12p11.23        | -0.25918 | 2.79E-07 | 3.04E-06 |
| ARL5A      | 2q23.3          | -0.25918 | 2.79E-07 | 3.04E-06 |
| ANP32A-IT1 | 15q23           | 0.259174 | 2.79E-07 | 3.04E-06 |
| NBEA       | 13q13.3         | -0.25915 | 2.80E-07 | 3.05E-06 |
| TCTN3      | 10q24.1         | -0.25913 | 2.81E-07 | 3.06E-06 |
| RRAGC      | 1p34.3          | -0.25911 | 2.81E-07 | 3.06E-06 |
| LMLN       | 3q29            | 0.259079 | 2.82E-07 | 3.07E-06 |
| EEF1AKNMT  | 1q24.3          | 0.259073 | 2.82E-07 | 3.07E-06 |
| RBKS       | 2p23.2          | -0.25901 | 2.84E-07 | 3.09E-06 |
| UFSP2      | 4q35.1          | -0.25897 | 2.85E-07 | 3.10E-06 |
| BMF        | 15q15.1         | -0.25892 | 2.87E-07 | 3.11E-06 |
| DMGDH      | 5q14.1          | -0.25892 | 2.87E-07 | 3.11E-06 |
| GTF2H4     | 6p21.33         | 0.258906 | 2.88E-07 | 3.12E-06 |
| SLC25A37   | 8p21.2          | 0.258869 | 2.89E-07 | 3.13E-06 |
| RAB33A     | Xq26.1          | -0.25883 | 2.90E-07 | 3.14E-06 |
| GPR85      | 7q31.1          | -0.2588  | 2.91E-07 | 3.15E-06 |
| MAP3K10    | 19q13.2         | 0.258728 | 2.93E-07 | 3.17E-06 |
| SPATA7     | 14q31.3         | -0.25873 | 2.93E-07 | 3.17E-06 |
| ANKRD29    | 18q11.2         | -0.25872 | 2.93E-07 | 3.17E-06 |

|           |          |          |          |          |
|-----------|----------|----------|----------|----------|
| DHRS12    | 13q14.3  | -0.25871 | 2.94E-07 | 3.17E-06 |
| BST1      | 4p15.32  | -0.25868 | 2.95E-07 | 3.18E-06 |
| P2RY14    | 3q25.1   | -0.25865 | 2.96E-07 | 3.19E-06 |
| BORA      | 13q21.33 | 0.258606 | 2.97E-07 | 3.20E-06 |
| MFSD14A   | 1p21.2   | -0.25857 | 2.98E-07 | 3.21E-06 |
| MYL6B     | 12q13.2  | -0.25854 | 2.99E-07 | 3.22E-06 |
| C6ORF141  | 6p12.3   | 0.258537 | 2.99E-07 | 3.22E-06 |
| ITGB6     | 2q24.2   | -0.25835 | 3.05E-07 | 3.29E-06 |
| GOLPH3    | 5p13.3   | -0.25835 | 3.06E-07 | 3.29E-06 |
| TRIM5     | 11p15.4  | -0.25825 | 3.09E-07 | 3.32E-06 |
| LYNX1     | 8q24.3   | -0.25824 | 3.09E-07 | 3.32E-06 |
| ZMAT3     | 3q26.32  | -0.25822 | 3.10E-07 | 3.33E-06 |
| DPP6      | 7q36.2   | -0.25813 | 3.13E-07 | 3.36E-06 |
| INHBA-AS1 | 7p14.1   | -0.25809 | 3.14E-07 | 3.37E-06 |
| POP1      | 8q22.2   | 0.257863 | 3.22E-07 | 3.45E-06 |
| MEOX2     | 7p21.2   | -0.2578  | 3.24E-07 | 3.48E-06 |
| KIAA1522  | 1p35.1   | 0.257747 | 3.26E-07 | 3.49E-06 |
| TRIM66    | 11p15.4  | 0.257706 | 3.28E-07 | 3.51E-06 |
| RSPO3     | 6q22.33  | -0.2576  | 3.31E-07 | 3.54E-06 |
| CST1      | 20p11.21 | -0.25758 | 3.32E-07 | 3.55E-06 |
| SNX3      | 6q21     | -0.25757 | 3.33E-07 | 3.55E-06 |
| TXLNB     | 6q24.1   | -0.25738 | 3.39E-07 | 3.62E-06 |
| GOLGA6L10 | 15q25.2  | 0.257371 | 3.40E-07 | 3.63E-06 |
| RAB18     | 10p12.1  | -0.25735 | 3.41E-07 | 3.63E-06 |
| TMEM121   | 14q32.33 | -0.25734 | 3.41E-07 | 3.63E-06 |
| GMFG      | 19q13.2  | -0.25731 | 3.42E-07 | 3.64E-06 |
| FLAD1     | 1q21.3   | 0.257283 | 3.43E-07 | 3.65E-06 |
| ATP1B2    | 17p13.1  | -0.25726 | 3.44E-07 | 3.66E-06 |
| PLPP7     | 9q34.13  | -0.25723 | 3.45E-07 | 3.67E-06 |
| TCEA2     | 20q13.33 | -0.25718 | 3.47E-07 | 3.69E-06 |
| FZD1      | 7q21.13  | -0.25713 | 3.49E-07 | 3.71E-06 |
| SCN9A     | 2q24.3   | -0.25713 | 3.49E-07 | 3.71E-06 |
| ARHGEF25  | 12q13.3  | -0.25708 | 3.51E-07 | 3.72E-06 |
| SLC35G2   | 3q22.3   | -0.25705 | 3.52E-07 | 3.73E-06 |
| TMEM119   | 12q23.3  | -0.25703 | 3.52E-07 | 3.74E-06 |
| CTNNB1    | 3p22.1   | -0.25702 | 3.53E-07 | 3.74E-06 |
| CRTAC1    | 10q24.2  | -0.257   | 3.54E-07 | 3.75E-06 |
| KCNMA1    | 10q22.3  | -0.25696 | 3.55E-07 | 3.76E-06 |
| ARRDC1    | 9q34.3   | 0.256918 | 3.57E-07 | 3.78E-06 |
| MOSPD1    | Xq26.3   | -0.2569  | 3.57E-07 | 3.78E-06 |
| ABHD13    | 13q33.3  | -0.25687 | 3.59E-07 | 3.79E-06 |
| CST2      | 20p11.21 | -0.25685 | 3.60E-07 | 3.80E-06 |
| LYSMD3    | 5q14.3   | -0.25683 | 3.60E-07 | 3.81E-06 |
| FAM83H    | 8q24.3   | 0.256809 | 3.61E-07 | 3.81E-06 |
| CHL1      | 3p26.3   | -0.2568  | 3.61E-07 | 3.81E-06 |
| PRKACB    | 1p31.1   | -0.25676 | 3.63E-07 | 3.83E-06 |
| MAN1C1    | 1p36.11  | -0.25674 | 3.64E-07 | 3.83E-06 |
| TTLL1     | 22q13.2  | -0.25674 | 3.64E-07 | 3.83E-06 |
| GAPT      | 5q11.2   | -0.2567  | 3.65E-07 | 3.85E-06 |
| CLEC2L    | 7q34     | -0.25668 | 3.66E-07 | 3.85E-06 |
| GLI1      | 12q13.3  | -0.25663 | 3.68E-07 | 3.87E-06 |
| DCTN2     | 12q13.3  | -0.25659 | 3.70E-07 | 3.89E-06 |
| PPP6R1    | 19q13.42 | 0.256572 | 3.70E-07 | 3.89E-06 |
| CFH       | 1q31.3   | -0.25654 | 3.72E-07 | 3.90E-06 |
| TEK       | 9p21.2   | -0.25651 | 3.73E-07 | 3.91E-06 |
| SEC61A2   | 10p14    | 0.256508 | 3.73E-07 | 3.91E-06 |
| CCL21     | 9p13.3   | -0.25649 | 3.74E-07 | 3.92E-06 |
| KLC2      | 11q13.2  | 0.256442 | 3.76E-07 | 3.94E-06 |



|           |              |          |          |          |
|-----------|--------------|----------|----------|----------|
| ACOT7     | 1p36.31      | 0.25627  | 3.83E-07 | 4.01E-06 |
| MCC       | 5q22.2       | -0.25626 | 3.83E-07 | 4.01E-06 |
| SMG1P3    | 16p12.2      | 0.256163 | 3.87E-07 | 4.05E-06 |
| CLDN20    | 6q25.3       | 0.256129 | 3.89E-07 | 4.06E-06 |
| MSH2      | 2p21-p16.3   | 0.256119 | 3.89E-07 | 4.07E-06 |
| AQP1      | 7p14.3       | -0.25609 | 3.90E-07 | 4.07E-06 |
| CRTC2     | 1q21.3       | 0.256044 | 3.92E-07 | 4.09E-06 |
| CAMKK1    | 17p13.2      | 0.256027 | 3.93E-07 | 4.10E-06 |
| CDKN2B    | 9p21.3       | -0.25603 | 3.93E-07 | 4.10E-06 |
| RBMS3     | 3p24.1       | -0.25599 | 3.94E-07 | 4.11E-06 |
| NME9      | 3q22.3       | 0.255951 | 3.96E-07 | 4.13E-06 |
| LGALS1    | 22q13.1      | -0.25595 | 3.96E-07 | 4.13E-06 |
| VAV3      | 1p13.3       | -0.25594 | 3.96E-07 | 4.13E-06 |
| SEPTIN4   | 17q22        | -0.25594 | 3.97E-07 | 4.13E-06 |
| SRGAP3    | 3p25.3       | -0.25585 | 4.00E-07 | 4.16E-06 |
| KCNK3     | 2p23.3       | -0.25582 | 4.02E-07 | 4.18E-06 |
| TM2D2     | 8p11.22      | -0.25581 | 4.02E-07 | 4.18E-06 |
| IFNGR2    | 21q22.11     | -0.25573 | 4.05E-07 | 4.21E-06 |
| STXBP3    | 1p13.3       | -0.25562 | 4.10E-07 | 4.26E-06 |
| ECPAS     | 9q31.3       | 0.25558  | 4.12E-07 | 4.28E-06 |
| USP43     | 17p13.1      | 0.25557  | 4.13E-07 | 4.28E-06 |
| COPZ2     | 17q21.32     | -0.25557 | 4.13E-07 | 4.28E-06 |
| HTRA3     | 4p16.1       | -0.25556 | 4.13E-07 | 4.28E-06 |
| OPCML     | 11q25        | -0.25555 | 4.13E-07 | 4.28E-06 |
| NEURL4    | 17p13.1      | 0.255515 | 4.15E-07 | 4.29E-06 |
| MSC       | 8q13.3       | -0.25547 | 4.17E-07 | 4.31E-06 |
| PMEPA1    | 20q13.31     | -0.25544 | 4.19E-07 | 4.32E-06 |
| INTS11    | 1p36.33      | 0.255379 | 4.21E-07 | 4.35E-06 |
| UBB       | 17p11.2      | -0.25537 | 4.22E-07 | 4.35E-06 |
| ZDHHHC11  | 5p15.33      | 0.255366 | 4.22E-07 | 4.35E-06 |
| GTSF1     | 12q13.13     | -0.25534 | 4.23E-07 | 4.36E-06 |
| PHYHIP    | 8p21.3       | -0.25532 | 4.24E-07 | 4.37E-06 |
| SFRP1     | 8p11.21      | -0.25528 | 4.26E-07 | 4.39E-06 |
| TIPIN     | 15q22.31     | 0.255255 | 4.27E-07 | 4.40E-06 |
| POLB      | 8p11.21      | -0.25523 | 4.28E-07 | 4.40E-06 |
| CIRBP-AS1 | 19p13.3      | 0.255232 | 4.28E-07 | 4.40E-06 |
| AKAP6     | 14q12        | -0.25523 | 4.28E-07 | 4.40E-06 |
| RBBP6     | 16p12.1      | 0.255128 | 4.33E-07 | 4.45E-06 |
| CERS4     | 19p13.2      | -0.25504 | 4.37E-07 | 4.49E-06 |
| MBOAT1    | 6p22.3       | 0.255008 | 4.38E-07 | 4.50E-06 |
| HOXB3     | 17q21.32     | 0.254995 | 4.39E-07 | 4.50E-06 |
| FBXL6     | 8q24.3       | 0.254988 | 4.39E-07 | 4.50E-06 |
| MAPK15    | -            | 0.254892 | 4.44E-07 | 4.55E-06 |
| DRAM2     | 1p13.3       | -0.25481 | 4.48E-07 | 4.59E-06 |
| GIMAP7    | 7q36.1       | -0.2548  | 4.48E-07 | 4.59E-06 |
| CRHBP     | 5q13.3       | -0.25471 | 4.53E-07 | 4.63E-06 |
| SPSB4     | 3q23         | -0.25469 | 4.54E-07 | 4.64E-06 |
| ARSB      | 5q14.1       | -0.25467 | 4.54E-07 | 4.65E-06 |
| ELMO1     | 7p14.2-p14.1 | -0.25464 | 4.56E-07 | 4.66E-06 |
| GOLGA2P10 | 15q25.2      | 0.254597 | 4.58E-07 | 4.68E-06 |
| GEM       | 8q22.1       | -0.25454 | 4.61E-07 | 4.71E-06 |
| PRICKLE2  | 3p14.1       | -0.25443 | 4.67E-07 | 4.76E-06 |
| THBS2     | 6q27         | -0.2544  | 4.68E-07 | 4.77E-06 |
| UBAP2     | 9p13.3       | 0.254357 | 4.70E-07 | 4.79E-06 |
| GASK1B    | 4q32.1       | -0.25433 | 4.71E-07 | 4.80E-06 |
| CD68      | 17p13.1      | -0.2543  | 4.73E-07 | 4.81E-06 |
| KIF5A     | 12q13.3      | -0.25429 | 4.73E-07 | 4.82E-06 |
| KCNAB1    | 3q25.31      | -0.25426 | 4.75E-07 | 4.83E-06 |

|           |                |          |          |          |
|-----------|----------------|----------|----------|----------|
| CNN1      | 19p13.2        | -0.25425 | 4.76E-07 | 4.83E-06 |
| GPM6A     | 4q34.2         | -0.25421 | 4.77E-07 | 4.85E-06 |
| MDFIC     | 7q31.1-q31.2   | -0.25409 | 4.84E-07 | 4.91E-06 |
| PPFIA3    | 19q13.33       | 0.254078 | 4.84E-07 | 4.91E-06 |
| NT5DC3    | 12q23.3        | 0.254078 | 4.84E-07 | 4.91E-06 |
| BCAN      | 1q23.1         | 0.254073 | 4.84E-07 | 4.91E-06 |
| REM1      | 20q11.21       | -0.25407 | 4.84E-07 | 4.91E-06 |
| BYSL      | 6p21.1         | 0.254021 | 4.87E-07 | 4.94E-06 |
| FAM83D    | 20q11.23       | 0.25401  | 4.88E-07 | 4.94E-06 |
| RGMA      | 15q26.1        | -0.25394 | 4.91E-07 | 4.97E-06 |
| HEYL      | 1p34.2         | -0.25393 | 4.92E-07 | 4.98E-06 |
| ELP1      | 9q31.3         | 0.253765 | 5.01E-07 | 5.06E-06 |
| ABHD8     | 19p13.11       | -0.25372 | 5.03E-07 | 5.08E-06 |
| HAGHL     | 16p13.3        | 0.25362  | 5.09E-07 | 5.14E-06 |
| SPEN      | 1p36.21-p36.13 | 0.253519 | 5.14E-07 | 5.19E-06 |
| TSG101    | 11p15.1        | -0.25344 | 5.19E-07 | 5.23E-06 |
| MAMDC2    | 9q21.12        | -0.25342 | 5.19E-07 | 5.24E-06 |
| KIAA0825  | 5q15           | -0.25341 | 5.20E-07 | 5.24E-06 |
| FAM155A   | 13q33.3        | -0.25341 | 5.20E-07 | 5.24E-06 |
| ANO3      | 11p14.3-p14.2  | -0.25313 | 5.36E-07 | 5.40E-06 |
| SEPTIN5   | 22q11.21       | -0.2531  | 5.38E-07 | 5.41E-06 |
| GOLGA6L9  | 15q25.2        | 0.25306  | 5.40E-07 | 5.43E-06 |
| SEPTIN2   | 2q37.3         | -0.25304 | 5.41E-07 | 5.44E-06 |
| SCN1B     | 19q13.11       | -0.25302 | 5.42E-07 | 5.45E-06 |
| LINC00312 | 3p25.3         | -0.253   | 5.43E-07 | 5.45E-06 |
| CC2D1A    | 19p13.12       | 0.252922 | 5.48E-07 | 5.50E-06 |
| BACH1     | 21q21.3        | -0.25292 | 5.48E-07 | 5.50E-06 |
| CD3EAP    | 19q13.32       | 0.252898 | 5.49E-07 | 5.51E-06 |
| ABCC10    | 6p21.1         | 0.25288  | 5.50E-07 | 5.52E-06 |
| DIPK1A    | 1p22.1         | -0.25286 | 5.52E-07 | 5.52E-06 |
| IRF3      | 19q13.33       | 0.252855 | 5.52E-07 | 5.52E-06 |
| BMS1P1    | 10q11.22       | 0.252854 | 5.52E-07 | 5.52E-06 |
| GNAI2     | 3p21.31        | -0.25285 | 5.52E-07 | 5.52E-06 |
| MAF       | 16q23.2        | -0.25284 | 5.52E-07 | 5.52E-06 |
| ANK2      | 4q25-q26       | -0.2528  | 5.55E-07 | 5.54E-06 |
| TAFA5     | 22q13.32       | -0.25278 | 5.56E-07 | 5.56E-06 |
| CD81      | 11p15.5        | -0.25272 | 5.60E-07 | 5.59E-06 |
| AAMDC     | 11q14.1        | -0.25264 | 5.65E-07 | 5.63E-06 |
| UBE2QL1   | 5p15.31        | -0.25262 | 5.66E-07 | 5.64E-06 |
| TRIM27    | 6p22.1         | 0.252601 | 5.67E-07 | 5.65E-06 |
| APMAP     | 20p11.21       | -0.25258 | 5.68E-07 | 5.66E-06 |
| ELN       | 7q11.23        | -0.25257 | 5.69E-07 | 5.67E-06 |
| MAZ       | 16p11.2        | 0.252535 | 5.71E-07 | 5.68E-06 |
| PFDN5     | 12q13.13       | -0.25246 | 5.75E-07 | 5.72E-06 |
| ACYP2     | 2p16.2         | -0.25244 | 5.76E-07 | 5.73E-06 |
| PHKG2     | 16p11.2        | 0.252418 | 5.78E-07 | 5.74E-06 |
| WTIP      | 19q13.11       | -0.25234 | 5.82E-07 | 5.79E-06 |
| UCHL1     | 4p13           | -0.25232 | 5.84E-07 | 5.80E-06 |
| ATP10D    | 4p12           | -0.2523  | 5.85E-07 | 5.81E-06 |
| TSC22D1   | 13q14.11       | -0.25227 | 5.87E-07 | 5.82E-06 |
| E2F4      | 16q22.1        | 0.252255 | 5.88E-07 | 5.83E-06 |
| SECISBP2L | 15q21.1        | -0.25224 | 5.89E-07 | 5.83E-06 |
| GSN       | 9q33.2         | -0.25222 | 5.90E-07 | 5.85E-06 |
| APC2      | 19p13.3        | 0.252198 | 5.92E-07 | 5.86E-06 |
| NUP50     | 22q13.31       | 0.252185 | 5.92E-07 | 5.86E-06 |
| FMO3      | 1q24.3         | -0.25214 | 5.95E-07 | 5.88E-06 |
| IKBIP     | 12q23.1        | -0.25213 | 5.96E-07 | 5.89E-06 |
| NMUR1     | 2q37.1         | -0.25212 | 5.96E-07 | 5.89E-06 |

|               |              |          |          |          |
|---------------|--------------|----------|----------|----------|
| TMEM143       | 19q13.33     | 0.252103 | 5.98E-07 | 5.90E-06 |
| INSIG2        | 2q14.1-q14.2 | -0.25208 | 5.99E-07 | 5.91E-06 |
| MAT2A         | 2p11.2       | 0.252043 | 6.01E-07 | 5.93E-06 |
| CLEC14A       | 14q21.1      | -0.252   | 6.04E-07 | 5.96E-06 |
| PROC          | 2q14.3       | -0.25196 | 6.06E-07 | 5.98E-06 |
| LMCD1         | 3p25.3       | -0.25193 | 6.08E-07 | 5.99E-06 |
| NINJ2         | 12p13.33     | -0.25188 | 6.11E-07 | 6.02E-06 |
| JMJD7-PLA2G4B | 15q15.1      | 0.251875 | 6.12E-07 | 6.02E-06 |
| DRD2          | 11q23.2      | -0.25186 | 6.13E-07 | 6.03E-06 |
| PIWIL1        | 12q24.33     | 0.251824 | 6.15E-07 | 6.05E-06 |
| ETS1          | 11q24.3      | -0.25176 | 6.19E-07 | 6.09E-06 |
| HLA-DPA1      | 6p21.32      | -0.25173 | 6.22E-07 | 6.10E-06 |
| TERF2IP       | 16q23.1      | -0.25166 | 6.26E-07 | 6.15E-06 |
| NRAS          | 1p13.2       | -0.25162 | 6.29E-07 | 6.17E-06 |
| YY1AP1        | 1q22         | 0.251609 | 6.30E-07 | 6.17E-06 |
| BCAM          | 19q13.32     | -0.25155 | 6.34E-07 | 6.21E-06 |
| ST13P4        | 13q14.2      | -0.25146 | 6.39E-07 | 6.27E-06 |
| YPEL3         | 16p11.2      | -0.25141 | 6.43E-07 | 6.30E-06 |
| AMOTL1        | 11q21        | -0.25137 | 6.46E-07 | 6.32E-06 |
| GIMAP4        | 7q36.1       | -0.25137 | 6.46E-07 | 6.32E-06 |
| TMEM150C      | 4q21.22      | -0.25134 | 6.48E-07 | 6.34E-06 |
| KCNV2         | 9p24.2       | 0.251333 | 6.48E-07 | 6.34E-06 |
| NDUFS7        | 19p13.3      | 0.2513   | 6.51E-07 | 6.36E-06 |
| AXL           | 19q13.2      | -0.25125 | 6.54E-07 | 6.39E-06 |
| E2F3          | 6p22.3       | 0.251175 | 6.59E-07 | 6.43E-06 |
| MZF1-AS1      | 19q13.43     | 0.251174 | 6.59E-07 | 6.43E-06 |
| POLR3A        | 10q22.3      | 0.251168 | 6.60E-07 | 6.43E-06 |
| C1ORF54       | 1q21.2       | -0.25114 | 6.61E-07 | 6.45E-06 |
| ARL4C         | 2q37.1       | -0.25113 | 6.62E-07 | 6.45E-06 |
| CCDC8         | 19q13.32     | -0.25108 | 6.66E-07 | 6.48E-06 |
| TP73          | 1p36.32      | 0.250898 | 6.79E-07 | 6.60E-06 |
| TPP1          | 11p15.4      | -0.25089 | 6.79E-07 | 6.61E-06 |
| NUDT1         | 7p22.3       | 0.250853 | 6.82E-07 | 6.63E-06 |
| CDCA4         | 14q32.33     | 0.250781 | 6.87E-07 | 6.68E-06 |
| SRF           | 6p21.1       | 0.250665 | 6.96E-07 | 6.76E-06 |
| LEFTY2        | 1q42.12      | -0.25064 | 6.97E-07 | 6.77E-06 |
| DDX55         | 12q24.31     | 0.250626 | 6.98E-07 | 6.78E-06 |
| HDGFL2        | 19p13.3      | 0.250624 | 6.99E-07 | 6.78E-06 |
| ALS2CL        | 3p21.31      | 0.250599 | 7.00E-07 | 6.79E-06 |
| NKAPL         | 6p22.1       | -0.25059 | 7.01E-07 | 6.79E-06 |
| ZBTB4         | 17p13.1      | -0.25056 | 7.03E-07 | 6.81E-06 |
| REEP5         | 5q22.2       | -0.25054 | 7.05E-07 | 6.82E-06 |
| NGFR          | 17q21.33     | -0.25048 | 7.10E-07 | 6.86E-06 |
| SLC25A27      | 6p12.3       | 0.250419 | 7.14E-07 | 6.90E-06 |
| RNF130        | 5q35.3       | -0.25041 | 7.15E-07 | 6.91E-06 |
| GLIPR1L2      | 12q21.2      | -0.25032 | 7.22E-07 | 6.97E-06 |
| LRRN4CL       | 11q12.3      | -0.25028 | 7.24E-07 | 6.99E-06 |
| ZSCAN2        | 15q25.2      | -0.25027 | 7.25E-07 | 7.00E-06 |
| LRRC15        | 3q29         | -0.25024 | 7.28E-07 | 7.02E-06 |
| PELI2         | 14q22.3      | -0.2502  | 7.30E-07 | 7.04E-06 |
| TNRC18        | 7p22.1       | 0.25016  | 7.34E-07 | 7.07E-06 |
| CRIPT         | 2p21         | -0.25015 | 7.34E-07 | 7.07E-06 |
| SELENOP       | 5p12         | -0.25015 | 7.35E-07 | 7.07E-06 |
| PI4KAP2       | 22q11.21     | 0.250116 | 7.37E-07 | 7.09E-06 |
| TLR7          | Xp22.2       | -0.2501  | 7.39E-07 | 7.10E-06 |
| CCDC57        | 17q25.3      | 0.25001  | 7.45E-07 | 7.16E-06 |
| VIM           | 10p13        | -0.25    | 7.46E-07 | 7.17E-06 |
| PPP2R5D       | 6p21.1       | 0.249986 | 7.47E-07 | 7.18E-06 |

|           |                |          |          |          |
|-----------|----------------|----------|----------|----------|
| CTU1      | 19q13.41       | 0.249861 | 7.57E-07 | 7.27E-06 |
| RPL32P3   | 3q21.3         | 0.249805 | 7.61E-07 | 7.31E-06 |
| SCARNA5   | 2q37.1         | -0.24979 | 7.63E-07 | 7.32E-06 |
| HTR7P1    | 12p13.1        | -0.24977 | 7.64E-07 | 7.33E-06 |
| ARPC5L    | 9q33.3         | 0.249651 | 7.74E-07 | 7.41E-06 |
| SNCA      | 4q22.1         | -0.24959 | 7.78E-07 | 7.46E-06 |
| TIAL1     | 10q26.11       | 0.249578 | 7.80E-07 | 7.46E-06 |
| RSPH1     | 21q22.3        | 0.249569 | 7.81E-07 | 7.47E-06 |
| S100A4    | 1q21.3         | -0.24954 | 7.83E-07 | 7.49E-06 |
| RXFP1     | 4q32.1         | -0.24948 | 7.88E-07 | 7.53E-06 |
| CST4      | 20p11.21       | -0.24938 | 7.96E-07 | 7.60E-06 |
| SPOCK1    | 5q31.2         | -0.24937 | 7.97E-07 | 7.61E-06 |
| OCIAD1    | 4p11           | -0.24936 | 7.98E-07 | 7.61E-06 |
| NPTX1     | 17q25.3        | -0.24932 | 8.01E-07 | 7.65E-06 |
| ABCC9     | 12p12.1        | -0.24929 | 8.04E-07 | 7.66E-06 |
| CHERP     | 19p13.11       | 0.249287 | 8.04E-07 | 7.66E-06 |
| ERCC1     | 19q13.32       | -0.24926 | 8.06E-07 | 7.68E-06 |
| HAND2-AS1 | 4q34.1         | -0.2492  | 8.11E-07 | 7.72E-06 |
| POGK      | 1q24.1         | 0.249163 | 8.14E-07 | 7.75E-06 |
| SPCS3     | 4q34.2         | -0.24916 | 8.15E-07 | 7.75E-06 |
| PRDM6     | 5q23.2         | -0.24915 | 8.15E-07 | 7.75E-06 |
| MXRA8     | 1p36.33        | -0.24914 | 8.17E-07 | 7.76E-06 |
| C11ORF52  | 11q23.1        | -0.24913 | 8.17E-07 | 7.77E-06 |
| RAB1A     | 2p14           | -0.249   | 8.28E-07 | 7.87E-06 |
| ZNF454    | 5q35.3         | -0.24898 | 8.30E-07 | 7.88E-06 |
| GPR183    | 13q32.3        | -0.24896 | 8.32E-07 | 7.89E-06 |
| TMEM200B  | 1p35.3         | -0.24896 | 8.32E-07 | 7.89E-06 |
| RMDN2     | 2p22.2         | -0.24893 | 8.35E-07 | 7.91E-06 |
| CDCA7L    | 7p15.3         | 0.248921 | 8.35E-07 | 7.91E-06 |
| IL1R1     | 2q11.2-q12.1   | -0.2489  | 8.37E-07 | 7.93E-06 |
| HERPUD2   | 7p14.2         | -0.24889 | 8.38E-07 | 7.93E-06 |
| NAGK      | 2p13.3         | -0.24881 | 8.45E-07 | 8.00E-06 |
| FOXC2     | 16q24.1        | -0.2488  | 8.46E-07 | 8.00E-06 |
| PRKG1     | 10q11.23-q21.1 | -0.24879 | 8.47E-07 | 8.00E-06 |
| ACSM5     | 16p12.3        | -0.24866 | 8.58E-07 | 8.11E-06 |
| LTBP3     | 11q13.1        | -0.24863 | 8.61E-07 | 8.13E-06 |
| MORC2     | 22q12.2        | 0.248603 | 8.64E-07 | 8.15E-06 |
| C14ORF132 | 14q32.2        | -0.24859 | 8.64E-07 | 8.15E-06 |
| ADAMTSL1  | 9p22.2-p22.1   | -0.24853 | 8.71E-07 | 8.21E-06 |
| ATG13     | 11p11.2        | -0.24849 | 8.74E-07 | 8.24E-06 |
| TTC30A    | 2q31.2         | -0.24847 | 8.76E-07 | 8.25E-06 |
| TTLL4     | 2q35           | 0.248458 | 8.77E-07 | 8.25E-06 |
| LSAMP     | 3q13.31        | -0.24845 | 8.77E-07 | 8.26E-06 |
| SLC22A17  | 14q11.2        | -0.24837 | 8.85E-07 | 8.32E-06 |
| RBM20     | 10q25.2        | -0.24832 | 8.89E-07 | 8.36E-06 |
| SNX10     | 7p15.2         | -0.24832 | 8.90E-07 | 8.36E-06 |
| LST1      | 6p21.33        | -0.24826 | 8.95E-07 | 8.40E-06 |
| NHLRC4    | 16p13.3        | -0.24821 | 9.00E-07 | 8.45E-06 |
| VEZF1     | 17q22          | -0.2482  | 9.00E-07 | 8.45E-06 |
| NRBF2     | 10q21.3        | -0.24814 | 9.06E-07 | 8.50E-06 |
| AKR7A2P1  | 1p13.2         | 0.248028 | 9.17E-07 | 8.60E-06 |
| MAP4K3    | 2p22.1         | -0.24802 | 9.18E-07 | 8.60E-06 |
| SIT1      | 9p13.3         | -0.24799 | 9.21E-07 | 8.62E-06 |
| GFPT2     | 5q35.3         | -0.24797 | 9.23E-07 | 8.64E-06 |
| SLC19A1   | 21q22.3        | 0.247957 | 9.24E-07 | 8.64E-06 |
| CXCL12    | 10q11.21       | -0.24793 | 9.26E-07 | 8.66E-06 |
| CDH2      | 18q12.1        | -0.24782 | 9.37E-07 | 8.76E-06 |
| LINC02447 | 4p16.1         | -0.2478  | 9.39E-07 | 8.78E-06 |

|            |                 |          |          |          |
|------------|-----------------|----------|----------|----------|
| INF2       | 14q32.33        | 0.247777 | 9.41E-07 | 8.79E-06 |
| CD63       | 12q13.2         | -0.24775 | 9.44E-07 | 8.81E-06 |
| BOC        | 3q13.2          | -0.24774 | 9.44E-07 | 8.81E-06 |
| PPM1M      | 3p21.2          | -0.2477  | 9.49E-07 | 8.85E-06 |
| COMTD1     | 10q22.2         | 0.247696 | 9.49E-07 | 8.85E-06 |
| HTR2A      | 13q14.2         | -0.24768 | 9.51E-07 | 8.86E-06 |
| SPARCL1    | 4q22.1          | -0.24767 | 9.52E-07 | 8.86E-06 |
| PLEKHO2    | 15q22.31        | -0.24765 | 9.54E-07 | 8.88E-06 |
| MYBBP1A    | 17p13.2         | 0.247575 | 9.61E-07 | 8.94E-06 |
| NEXN       | 1p31.1          | -0.24757 | 9.61E-07 | 8.94E-06 |
| LPCAT2     | 16q12.2         | -0.24757 | 9.62E-07 | 8.94E-06 |
| HIST1H2BO  | 6p22.1          | 0.247497 | 9.69E-07 | 9.00E-06 |
| HSPA14     | 10p13           | 0.247465 | 9.72E-07 | 9.03E-06 |
| IMPDH1     | 7q32.1          | 0.247453 | 9.73E-07 | 9.04E-06 |
| ITPR1      | 3p26.1          | -0.24743 | 9.75E-07 | 9.05E-06 |
| PMS2P9     | 7q11.23         | 0.247426 | 9.76E-07 | 9.05E-06 |
| RETREG2    | 2q35            | -0.2474  | 9.78E-07 | 9.07E-06 |
| CD1C       | 1q23.1          | -0.24738 | 9.81E-07 | 9.09E-06 |
| POPDC2     | 3q13.33         | -0.24728 | 9.91E-07 | 9.18E-06 |
| LINC00324  | 17p13.1         | -0.24726 | 9.93E-07 | 9.19E-06 |
| LRRC55     | 11q12.1         | -0.24724 | 9.95E-07 | 9.21E-06 |
| LAT2       | 7q11.23         | -0.24723 | 9.96E-07 | 9.22E-06 |
| TRAK2      | 2q33.1          | -0.24721 | 9.98E-07 | 9.23E-06 |
| DCST1      | 1q21.3          | 0.24719  | 1.00E-06 | 9.25E-06 |
| CCDC88C    | 14q32.11-q32.12 | 0.247141 | 1.01E-06 | 9.29E-06 |
| SPIN2A     | Xp11.21         | -0.24711 | 1.01E-06 | 9.31E-06 |
| SSRP1      | 11q12.1         | 0.247099 | 1.01E-06 | 9.32E-06 |
| SCOC       | 4q31.1          | -0.24708 | 1.01E-06 | 9.33E-06 |
| DLEU2L     | 1p31.3          | 0.246948 | 1.03E-06 | 9.46E-06 |
| VRK1       | 14q32.2         | 0.24691  | 1.03E-06 | 9.49E-06 |
| PPP1R15B   | 1q32.1          | 0.246909 | 1.03E-06 | 9.49E-06 |
| CAB39L     | 13q14.2         | -0.24682 | 1.04E-06 | 9.57E-06 |
| SIPA1      | 11q13.1         | -0.24682 | 1.04E-06 | 9.57E-06 |
| BPI        | 20q11.23        | -0.24678 | 1.04E-06 | 9.60E-06 |
| PUSL1      | 1p36.33         | 0.246777 | 1.04E-06 | 9.60E-06 |
| HMGB3      | Xq28            | 0.246771 | 1.04E-06 | 9.60E-06 |
| UGP2       | 2p15            | -0.24675 | 1.05E-06 | 9.61E-06 |
| CASC15     | 6p22.3          | -0.24675 | 1.05E-06 | 9.61E-06 |
| ZIK1       | 19q13.43        | -0.24672 | 1.05E-06 | 9.64E-06 |
| CST3       | 20p11.21        | -0.24671 | 1.05E-06 | 9.64E-06 |
| APLP2      | 11q24.3         | -0.24666 | 1.06E-06 | 9.69E-06 |
| OR2B6      | 6p22.1          | 0.246641 | 1.06E-06 | 9.71E-06 |
| QKI        | 6q26            | -0.24662 | 1.06E-06 | 9.73E-06 |
| LBH        | 2p23.1          | -0.24661 | 1.06E-06 | 9.73E-06 |
| PFDN2      | 1q23.3          | 0.246607 | 1.06E-06 | 9.73E-06 |
| ARHGAP15   | 2q22.2-q22.3    | -0.24658 | 1.07E-06 | 9.75E-06 |
| LUC7L3     | 17q21.33        | 0.246567 | 1.07E-06 | 9.76E-06 |
| SLC4A2     | 7q36.1          | 0.24655  | 1.07E-06 | 9.77E-06 |
| CPA4       | 7q32.2          | -0.24651 | 1.07E-06 | 9.81E-06 |
| PHF21A     | 11p11.2         | -0.24649 | 1.08E-06 | 9.82E-06 |
| ACKR3      | 2q37.3          | -0.24635 | 1.09E-06 | 9.96E-06 |
| WNT2       | 7q31.2          | -0.24633 | 1.09E-06 | 9.98E-06 |
| VIPR2      | 7q36.3          | -0.24632 | 1.09E-06 | 9.99E-06 |
| ABCA1      | 9q31.1          | -0.24631 | 1.10E-06 | 9.99E-06 |
| GOLGA7     | 8p11.21         | -0.2463  | 1.10E-06 | 9.99E-06 |
| BECN1      | 17q21.31        | -0.24628 | 1.10E-06 | 1.00E-05 |
| ZNF436-AS1 | 1p36.12         | 0.24627  | 1.10E-06 | 1.00E-05 |
| PPIP5K1    | 15q15.3         | 0.246229 | 1.11E-06 | 1.01E-05 |

|            |                     |          |          |          |
|------------|---------------------|----------|----------|----------|
| STARD3NL   | 7p14.1              | -0.24622 | 1.11E-06 | 1.01E-05 |
| HHAT       | 1q32.2              | -0.24616 | 1.11E-06 | 1.01E-05 |
| MORN1      | 1p36.32             | 0.246125 | 1.12E-06 | 1.02E-05 |
| GPBAR1     | 2q35                | -0.24599 | 1.13E-06 | 1.03E-05 |
| GOLGA3     | 12q24.33            | 0.245985 | 1.13E-06 | 1.03E-05 |
| CFI        | 4q25                | -0.24597 | 1.13E-06 | 1.03E-05 |
| SCN7A      | 2q24.3              | -0.24587 | 1.15E-06 | 1.04E-05 |
| GTF2IRD2P1 | 7q11.23             | -0.24585 | 1.15E-06 | 1.04E-05 |
| MCM8       | 20p12.3             | 0.245813 | 1.15E-06 | 1.05E-05 |
| THY1       | 11q23.3             | -0.24581 | 1.15E-06 | 1.05E-05 |
| TFR2       | 7q22.1              | 0.24577  | 1.16E-06 | 1.05E-05 |
| CACYBP     | 1q25.1              | 0.245754 | 1.16E-06 | 1.05E-05 |
| NAPSB      | 19q13.33            | -0.24571 | 1.17E-06 | 1.05E-05 |
| KLHL7      | 7p15.3              | -0.24561 | 1.18E-06 | 1.06E-05 |
| CHMP5      | 9p13.3              | -0.24558 | 1.18E-06 | 1.07E-05 |
| OS9        | 12q13.3-q14.1       | -0.24553 | 1.19E-06 | 1.07E-05 |
| CRMP1      | 4p16.2              | -0.24552 | 1.19E-06 | 1.07E-05 |
| UBL3       | 13q12.3             | -0.24551 | 1.19E-06 | 1.07E-05 |
| FNDC1      | 6q25.3              | -0.24551 | 1.19E-06 | 1.07E-05 |
| ST8SIA1    | 12p12.1             | -0.24549 | 1.19E-06 | 1.08E-05 |
| MYOZ3      | 5q33.1              | -0.24548 | 1.19E-06 | 1.08E-05 |
| RNF170     | 8p11.21             | -0.24545 | 1.20E-06 | 1.08E-05 |
| CHN1       | 2q31.1              | -0.24542 | 1.20E-06 | 1.08E-05 |
| CCNI       | 4q21.1              | -0.24536 | 1.21E-06 | 1.09E-05 |
| FN1        | 2q35                | -0.24532 | 1.21E-06 | 1.09E-05 |
| PCDHB10    | 5q31.3              | -0.24532 | 1.21E-06 | 1.09E-05 |
| VPS11      | 11q23.3             | -0.24531 | 1.21E-06 | 1.09E-05 |
| TM6SF1     | 15q25.2             | -0.24523 | 1.22E-06 | 1.10E-05 |
| ATF2       | 2q31.1              | -0.24522 | 1.23E-06 | 1.10E-05 |
| MB21D2     | 3q29                | -0.24521 | 1.23E-06 | 1.10E-05 |
| LRRC29     | 16q22.1             | -0.24518 | 1.23E-06 | 1.11E-05 |
| PIWIL2     | 8p21.3              | -0.24516 | 1.23E-06 | 1.11E-05 |
| LINC02800  | 1p36.11             | 0.245136 | 1.24E-06 | 1.11E-05 |
| LOC728392  | 17p13.2             | -0.24511 | 1.24E-06 | 1.11E-05 |
| LMAN2L     | 2q11.2              | -0.24509 | 1.24E-06 | 1.11E-05 |
| MN1        | 22q12.1             | -0.24503 | 1.25E-06 | 1.12E-05 |
| GMPR2      | 14q12               | -0.24503 | 1.25E-06 | 1.12E-05 |
| CELF1      | 11p11.2             | 0.244989 | 1.26E-06 | 1.12E-05 |
| BEND6      | 6p12.1              | -0.24494 | 1.26E-06 | 1.13E-05 |
| EFCAB1     | 8q11.21             | -0.24492 | 1.26E-06 | 1.13E-05 |
| MFSD13A    | 10q24.32            | 0.244915 | 1.27E-06 | 1.13E-05 |
| UMPS       | 3q21.2              | 0.244841 | 1.28E-06 | 1.14E-05 |
| MSLNL      | 16p13.3             | 0.244817 | 1.28E-06 | 1.14E-05 |
| SLC35E3    | 12q15               | -0.24481 | 1.28E-06 | 1.14E-05 |
| U2AF2      | 19q13.42            | 0.244793 | 1.28E-06 | 1.14E-05 |
| CCDC121    | 2p23.3              | -0.24476 | 1.29E-06 | 1.15E-05 |
| LINC00882  | 3q13.12             | -0.24472 | 1.29E-06 | 1.15E-05 |
| EGR2       | 10q21.3             | -0.24472 | 1.29E-06 | 1.15E-05 |
| ZSCAN31    | 6p22.1 6p22.3-p22.1 | -0.24461 | 1.31E-06 | 1.16E-05 |
| GJA5       | 1q21.2              | -0.24451 | 1.32E-06 | 1.17E-05 |
| AARD       | 8q24.11             | -0.24451 | 1.32E-06 | 1.17E-05 |
| TMBIM4     | 12q14.3             | -0.24449 | 1.32E-06 | 1.17E-05 |
| DIO2       | 14q31.1             | -0.24444 | 1.33E-06 | 1.18E-05 |
| CEACAM22P  | 19q13.31            | 0.244427 | 1.33E-06 | 1.18E-05 |
| RBPMS2     | 15q22.31            | -0.24441 | 1.33E-06 | 1.18E-05 |
| MIS18A     | 21q22.11            | 0.244402 | 1.33E-06 | 1.18E-05 |
| KIF3C      | 2p23.3              | -0.2444  | 1.33E-06 | 1.18E-05 |
| PCDHB18P   | 5q31.3              | -0.24438 | 1.34E-06 | 1.19E-05 |

|           |              |          |          |          |
|-----------|--------------|----------|----------|----------|
| HNF1A-AS1 | 12q24.31     | 0.244303 | 1.35E-06 | 1.19E-05 |
| LOXL4     | 10q24.2      | -0.24429 | 1.35E-06 | 1.19E-05 |
| RSPO1     | 1p34.3       | -0.24417 | 1.37E-06 | 1.21E-05 |
| TARS2     | 1q21.2       | 0.244166 | 1.37E-06 | 1.21E-05 |
| GAMT      | 19p13.3      | -0.24413 | 1.37E-06 | 1.21E-05 |
| PLD4      | 14q32.33     | -0.24408 | 1.38E-06 | 1.22E-05 |
| JPH4      | 14q11.2      | -0.24407 | 1.38E-06 | 1.22E-05 |
| NAALADL1  | 11q13.1      | -0.24406 | 1.38E-06 | 1.22E-05 |
| OSTC      | 4q25         | -0.244   | 1.39E-06 | 1.23E-05 |
| PCYT1B    | Xp22.11      | -0.24397 | 1.39E-06 | 1.23E-05 |
| NRXN2     | 11q13.1      | -0.24393 | 1.40E-06 | 1.24E-05 |
| ARHGEF16  | 1p36.32      | 0.243917 | 1.40E-06 | 1.24E-05 |
| PTHLH     | 12p11.22     | -0.24385 | 1.41E-06 | 1.24E-05 |
| ACACA     | 17q12        | 0.243849 | 1.41E-06 | 1.24E-05 |
| NCALD     | 8q22.3       | -0.2438  | 1.42E-06 | 1.25E-05 |
| CASP4     | 11q22.3      | -0.2438  | 1.42E-06 | 1.25E-05 |
| DIP2A     | 21q22.3      | 0.243696 | 1.43E-06 | 1.26E-05 |
| TMEM52B   | 12p13.2      | -0.24364 | 1.44E-06 | 1.27E-05 |
| SKP2      | 5p13.2       | 0.243586 | 1.45E-06 | 1.27E-05 |
| PFN1P2    | 1p11.2       | 0.243578 | 1.45E-06 | 1.28E-05 |
| FBXL7     | 5p15.1       | -0.24355 | 1.46E-06 | 1.28E-05 |
| NCR3LG1   | 11p15.1      | 0.243545 | 1.46E-06 | 1.28E-05 |
| EP400     | 12q24.33     | 0.243533 | 1.46E-06 | 1.28E-05 |
| ACBD6     | 1q25.2-q25.3 | 0.243511 | 1.46E-06 | 1.28E-05 |
| CALU      | 7q32.1       | -0.24351 | 1.46E-06 | 1.28E-05 |
| PRIMA1    | 14q32.12     | -0.2435  | 1.46E-06 | 1.28E-05 |
| MRPS2     | 9q34.3       | 0.243478 | 1.47E-06 | 1.28E-05 |
| ERG       | 21q22.2      | -0.24343 | 1.47E-06 | 1.29E-05 |
| TSPAN6    | Xq22.1       | -0.24342 | 1.47E-06 | 1.29E-05 |
| VSTM4     | 10q11.23     | -0.24329 | 1.49E-06 | 1.31E-05 |
| FGF2      | 4q28.1       | -0.24322 | 1.51E-06 | 1.32E-05 |
| GAK       | 4p16.3       | 0.243215 | 1.51E-06 | 1.32E-05 |
| MTVR2     | 17q22        | 0.243185 | 1.51E-06 | 1.32E-05 |
| RNF122    | 8p12         | -0.24316 | 1.51E-06 | 1.32E-05 |
| SAMD11    | 1p36.33      | -0.24315 | 1.52E-06 | 1.32E-05 |
| TMEM123   | 11q22.2      | -0.2431  | 1.52E-06 | 1.33E-05 |
| TUBB      | 6p21.33      | 0.24304  | 1.53E-06 | 1.34E-05 |
| PIEZO1    | 16q24.3      | 0.242943 | 1.55E-06 | 1.35E-05 |
| METTL3    | 14q11.2      | 0.242933 | 1.55E-06 | 1.35E-05 |
| TLCD3B    | 16p11.2      | 0.242932 | 1.55E-06 | 1.35E-05 |
| SART3     | 12q23.3      | 0.242883 | 1.56E-06 | 1.36E-05 |
| TNK2      | 3q29         | 0.242874 | 1.56E-06 | 1.36E-05 |
| SUSD6     | 14q24.1      | -0.24285 | 1.56E-06 | 1.36E-05 |
| ARHGAP28  | 18p11.31     | -0.24281 | 1.57E-06 | 1.37E-05 |
| NRGN      | 11q24.2      | 0.242778 | 1.57E-06 | 1.37E-05 |
| STMN1     | 1p36.11      | 0.242751 | 1.58E-06 | 1.37E-05 |
| AP1G2     | 14q11.2      | 0.24275  | 1.58E-06 | 1.37E-05 |
| ADCY2     | 5p15.31      | -0.24274 | 1.58E-06 | 1.37E-05 |
| SYNDIG1   | 20p11.21     | -0.24269 | 1.59E-06 | 1.38E-05 |
| ARGFXP2   | 17q11.2      | 0.242692 | 1.59E-06 | 1.38E-05 |
| HS2ST1    | 1p22.3       | -0.24266 | 1.59E-06 | 1.38E-05 |
| ARL2BP    | 16q13        | -0.24263 | 1.60E-06 | 1.39E-05 |
| PRXL2C    | 9q22.33      | -0.24262 | 1.60E-06 | 1.39E-05 |
| TAS2R14   | 12p13.2      | 0.242594 | 1.60E-06 | 1.39E-05 |
| MARK2     | 11q13.1      | 0.242572 | 1.61E-06 | 1.39E-05 |
| SYDE1     | 19p13.12     | -0.24257 | 1.61E-06 | 1.39E-05 |
| CCAR1     | 10q21.3      | 0.242565 | 1.61E-06 | 1.39E-05 |
| BNC2      | 9p22.3-p22.2 | -0.24256 | 1.61E-06 | 1.39E-05 |

|          |                     |          |          |          |
|----------|---------------------|----------|----------|----------|
| KCNIP2   | 10q24.32            | 0.242545 | 1.61E-06 | 1.39E-05 |
| ZXDC     | 3q21.3              | 0.242514 | 1.62E-06 | 1.40E-05 |
| TM4SF18  | 3q25.1              | -0.24251 | 1.62E-06 | 1.40E-05 |
| WSCD2    | 12q23.3             | -0.24249 | 1.62E-06 | 1.40E-05 |
| NUAK1    | 12q23.3             | -0.24245 | 1.63E-06 | 1.40E-05 |
| EIF2B5   | 3q27.1              | 0.242421 | 1.63E-06 | 1.41E-05 |
| MSTO2P   | 1q22                | 0.242408 | 1.64E-06 | 1.41E-05 |
| KDSR     | 18q21.33            | -0.24241 | 1.64E-06 | 1.41E-05 |
| MERTK    | 2q13                | -0.24236 | 1.64E-06 | 1.41E-05 |
| PMPCA    | 9q34.3              | 0.242339 | 1.65E-06 | 1.42E-05 |
| TRPM8    | 2q37.1              | -0.2423  | 1.65E-06 | 1.42E-05 |
| ITFG1    | 16q12.1             | -0.24224 | 1.66E-06 | 1.43E-05 |
| SLC25A44 | 1q22                | 0.242233 | 1.66E-06 | 1.43E-05 |
| DAB2     | 5p13.1              | -0.24222 | 1.67E-06 | 1.43E-05 |
| DCLRE1C  | 10p13               | 0.2421   | 1.69E-06 | 1.45E-05 |
| VPS13A   | 9q21.2              | 0.242056 | 1.69E-06 | 1.45E-05 |
| NHSL1    | 6q24.1              | 0.242029 | 1.70E-06 | 1.46E-05 |
| EDRF1    | 10q26.2             | 0.242011 | 1.70E-06 | 1.46E-05 |
| MS4A6A   | 11q12.2             | -0.24198 | 1.71E-06 | 1.46E-05 |
| TOM1     | 22q12.3             | -0.24198 | 1.71E-06 | 1.46E-05 |
| ZDHHC4   | 7p22.1              | -0.24177 | 1.74E-06 | 1.49E-05 |
| B3GNT4   | 12q24.31            | 0.241751 | 1.75E-06 | 1.50E-05 |
| ANKRD52  | 12q13.3             | 0.241739 | 1.75E-06 | 1.50E-05 |
| SP100    | 2q37.1              | -0.24171 | 1.76E-06 | 1.50E-05 |
| VAT1     | 17q21.31            | -0.24162 | 1.77E-06 | 1.51E-05 |
| TCEAL4   | Xq22.2              | -0.24155 | 1.78E-06 | 1.52E-05 |
| PSMG3    | 7p22.3              | 0.241544 | 1.78E-06 | 1.53E-05 |
| FOXS1    | 20q11.21            | -0.24152 | 1.79E-06 | 1.53E-05 |
| RTL8B    | Xq26.3              | -0.24148 | 1.80E-06 | 1.53E-05 |
| GYS1     | 19q13.33            | 0.241465 | 1.80E-06 | 1.54E-05 |
| ARL1     | 12q23.2             | -0.2414  | 1.81E-06 | 1.55E-05 |
| LTBP2    | 14q24.3             | -0.24133 | 1.82E-06 | 1.55E-05 |
| CFAP73   | 12q24.13            | 0.24128  | 1.83E-06 | 1.56E-05 |
| BRAT1    | 7p22.3              | 0.241211 | 1.85E-06 | 1.57E-05 |
| GAS8     | 16q24.3             | 0.241178 | 1.85E-06 | 1.58E-05 |
| PPP2R3B  | Xp22.33 and Yp11.31 | 0.241104 | 1.87E-06 | 1.59E-05 |
| PCDHB16  | 5q31.3              | -0.24107 | 1.87E-06 | 1.59E-05 |
| PPAN     | 19p13.2             | 0.241066 | 1.87E-06 | 1.59E-05 |
| UQCC2    | 6p21.31             | 0.241034 | 1.88E-06 | 1.60E-05 |
| CACNA2D1 | 7q21.11             | -0.24103 | 1.88E-06 | 1.60E-05 |
| PCDHA7   | 5q31.3              | -0.24102 | 1.88E-06 | 1.60E-05 |
| GNRH1    | 8p21.2              | 0.24101  | 1.88E-06 | 1.60E-05 |
| OGT      | Xq13.1              | 0.240953 | 1.89E-06 | 1.61E-05 |
| SORBS1   | 10q24.1             | -0.24095 | 1.90E-06 | 1.61E-05 |
| ACADM    | 1p31.1              | -0.24089 | 1.91E-06 | 1.62E-05 |
| MINPP1   | 10q23.2             | -0.24087 | 1.91E-06 | 1.62E-05 |
| SCAMP3   | 1q22                | 0.240848 | 1.92E-06 | 1.62E-05 |
| PLS3     | Xq23                | -0.24079 | 1.93E-06 | 1.63E-05 |
| VCAN     | 5q14.2-q14.3        | -0.24079 | 1.93E-06 | 1.63E-05 |
| ACAD9    | 3q21.3              | 0.240681 | 1.95E-06 | 1.65E-05 |
| VOPP1    | 7p11.2              | -0.24062 | 1.96E-06 | 1.66E-05 |
| WIPI1    | 17q24.2             | -0.24061 | 1.96E-06 | 1.66E-05 |
| ASB6     | 9q34.11             | 0.240581 | 1.97E-06 | 1.66E-05 |
| GPR65    | 14q31.3             | -0.24058 | 1.97E-06 | 1.66E-05 |
| PRIM1    | 12q13.3             | 0.240512 | 1.98E-06 | 1.67E-05 |
| CYP11A1  | 15q24.1             | -0.24047 | 1.99E-06 | 1.68E-05 |
| ZNF714   | 19p12               | 0.240366 | 2.01E-06 | 1.70E-05 |
| CRLF1    | 19p13.11            | -0.24035 | 2.01E-06 | 1.70E-05 |



|           |               |          |          |          |
|-----------|---------------|----------|----------|----------|
| PPP1R14A  | 19q13.2       | -0.24035 | 2.01E-06 | 1.70E-05 |
| EIF3B     | 7p22.3        | 0.24034  | 2.02E-06 | 1.70E-05 |
| PA2G4     | 12q13.2       | 0.240312 | 2.02E-06 | 1.70E-05 |
| LINC00924 | 15q26.2       | -0.24029 | 2.03E-06 | 1.71E-05 |
| LINC01002 | 19p13.3       | 0.240263 | 2.03E-06 | 1.71E-05 |
| ETFRF1    | 12p12.1       | -0.24025 | 2.03E-06 | 1.71E-05 |
| TOR2A     | 9q34.11       | 0.240221 | 2.04E-06 | 1.72E-05 |
| SBF1      | 22q13.33      | 0.240211 | 2.04E-06 | 1.72E-05 |
| CCL19     | 9p13.3        | -0.24021 | 2.04E-06 | 1.72E-05 |
| MIB2      | 1p36.33       | 0.240186 | 2.05E-06 | 1.72E-05 |
| PNKP      | 19q13.33      | 0.240137 | 2.06E-06 | 1.73E-05 |
| UBTD1     | 10q24.1-q24.2 | -0.24013 | 2.06E-06 | 1.73E-05 |
| SNAI2     | 8q11.21       | -0.24012 | 2.06E-06 | 1.73E-05 |
| RUNX1T1   | 8q21.3        | -0.2401  | 2.07E-06 | 1.73E-05 |
| HMCN1     | 1q25.3-q31.1  | -0.23996 | 2.09E-06 | 1.76E-05 |
| P2RY12    | 3q25.1        | -0.23992 | 2.10E-06 | 1.76E-05 |
| USP49     | 6p21.1        | 0.23992  | 2.10E-06 | 1.76E-05 |
| GADL1     | 3p24.1-p23    | -0.2399  | 2.11E-06 | 1.76E-05 |
| STPG3     | 9q34.3        | 0.239787 | 2.13E-06 | 1.78E-05 |
| POGZ      | 1q21.3        | 0.239781 | 2.13E-06 | 1.78E-05 |
| GRN       | 17q21.31      | -0.23977 | 2.13E-06 | 1.78E-05 |
| TUB       | 11p15.4       | -0.23977 | 2.13E-06 | 1.78E-05 |
| POLH      | 6p21.1        | 0.239719 | 2.15E-06 | 1.79E-05 |
| CPE       | 4q32.3        | -0.23966 | 2.16E-06 | 1.80E-05 |
| SLC26A1   | 4p16.3        | 0.239654 | 2.16E-06 | 1.80E-05 |
| AGO2      | 8q24.3        | 0.239528 | 2.19E-06 | 1.82E-05 |
| SERINC4   | 15q15.3       | 0.23946  | 2.20E-06 | 1.84E-05 |
| GIMAP6    | 7q36.1        | -0.23944 | 2.21E-06 | 1.84E-05 |
| EARS2     | 16p12.2       | 0.239432 | 2.21E-06 | 1.84E-05 |
| TEPSIN    | 17q25.3       | 0.2394   | 2.22E-06 | 1.85E-05 |
| DNAJB2    | 2q35          | -0.23939 | 2.22E-06 | 1.85E-05 |
| C1QTNF8   | 16p13.3       | 0.239357 | 2.23E-06 | 1.85E-05 |
| ENOSF1    | 18p11.32      | 0.239355 | 2.23E-06 | 1.85E-05 |
| ATP13A2   | 1p36.13       | 0.239341 | 2.23E-06 | 1.85E-05 |
| C3ORF38   | 3p11.1        | -0.23932 | 2.23E-06 | 1.86E-05 |
| PGRMC2    | 4q28.2        | -0.23931 | 2.23E-06 | 1.86E-05 |
| FAM13C    | 10q21.1       | -0.2393  | 2.24E-06 | 1.86E-05 |
| NOC2LP2   | 2q21.1        | 0.239281 | 2.24E-06 | 1.86E-05 |
| ADCY5     | 3q21.1        | -0.23923 | 2.25E-06 | 1.87E-05 |
| AJM1      | 9q34.3        | 0.239223 | 2.26E-06 | 1.87E-05 |
| PDZD4     | Xq28          | -0.2392  | 2.26E-06 | 1.87E-05 |
| GRK6      | 5q35.3        | 0.239134 | 2.28E-06 | 1.89E-05 |
| MED25     | 19q13.33      | 0.239113 | 2.28E-06 | 1.89E-05 |
| ERMAP     | 1p34.2        | -0.23905 | 2.29E-06 | 1.90E-05 |
| GFRA1     | 10q25.3       | -0.23897 | 2.31E-06 | 1.91E-05 |
| SBNO2     | 19p13.3       | 0.238964 | 2.31E-06 | 1.91E-05 |
| PPP2R3A   | 3q22.2-q22.3  | -0.23887 | 2.34E-06 | 1.93E-05 |
| RPS10P7   | 1q32.1        | 0.238847 | 2.34E-06 | 1.94E-05 |
| NOG       | 17q22         | -0.23881 | 2.35E-06 | 1.94E-05 |
| ZNF700    | 19p13.2       | 0.238802 | 2.35E-06 | 1.94E-05 |
| ZMAT5     | 22q12.2       | -0.23878 | 2.36E-06 | 1.95E-05 |
| MLLT11    | 1q21.3        | -0.23865 | 2.39E-06 | 1.97E-05 |
| MAP3K9    | 14q24.2       | 0.238628 | 2.39E-06 | 1.97E-05 |
| ENO3      | 17p13.2       | 0.238509 | 2.42E-06 | 2.00E-05 |
| COL10A1   | 6q22.1        | -0.23843 | 2.44E-06 | 2.01E-05 |
| MLKL      | 16q23.1       | 0.238385 | 2.45E-06 | 2.02E-05 |
| PSORS1C2  | 6p21.33       | 0.238384 | 2.45E-06 | 2.02E-05 |
| PDGFRA    | 4q12          | -0.23834 | 2.46E-06 | 2.03E-05 |

|          |                |          |          |          |
|----------|----------------|----------|----------|----------|
| RGS4     | 1q23.3         | -0.23832 | 2.47E-06 | 2.03E-05 |
| ASNSD1   | 2q32.2         | -0.23828 | 2.48E-06 | 2.04E-05 |
| ARMCX2   | Xq22.1         | -0.23817 | 2.51E-06 | 2.06E-05 |
| AZIN2    | 1p35.1         | -0.23814 | 2.51E-06 | 2.07E-05 |
| HNRNPL   | 19q13.2        | 0.238135 | 2.51E-06 | 2.07E-05 |
| TIMM44   | 19p13.2        | 0.238132 | 2.52E-06 | 2.07E-05 |
| TRAP1    | 16p13.3        | 0.238127 | 2.52E-06 | 2.07E-05 |
| PTGFR    | 1p31.1         | -0.23802 | 2.54E-06 | 2.09E-05 |
| RNFT1    | 17q23.1        | -0.238   | 2.55E-06 | 2.09E-05 |
| TCEAL1   | Xq22.2         | -0.23799 | 2.55E-06 | 2.09E-05 |
| HIST1H3B | 6p22.2         | 0.237908 | 2.57E-06 | 2.11E-05 |
| ABCB8    | 7q36.1         | 0.237907 | 2.57E-06 | 2.11E-05 |
| CALCR    | 7q21.3         | -0.23783 | 2.59E-06 | 2.12E-05 |
| PLXNA1   | 3q21.3         | 0.237784 | 2.60E-06 | 2.13E-05 |
| CABIN1   | 22q11.23       | 0.237775 | 2.61E-06 | 2.13E-05 |
| FIGN     | 2q24.3         | -0.23771 | 2.62E-06 | 2.15E-05 |
| NCAPH2   | 22q13.33       | 0.237706 | 2.62E-06 | 2.15E-05 |
| RPS6KL1  | 14q24.3        | 0.237677 | 2.63E-06 | 2.15E-05 |
| ZNF582   | 19q13.43       | -0.23763 | 2.65E-06 | 2.16E-05 |
| CKMT1B   | 15q15.3        | 0.237603 | 2.65E-06 | 2.16E-05 |
| ADRB2    | 5q32           | -0.23756 | 2.66E-06 | 2.17E-05 |
| CDK11A   | 1p36.33        | 0.237454 | 2.69E-06 | 2.20E-05 |
| ZNF841   | 19q13.41       | 0.237405 | 2.70E-06 | 2.20E-05 |
| ZNF300P1 | 5q33.1         | -0.2374  | 2.70E-06 | 2.20E-05 |
| RASL12   | 15q22.31       | -0.2374  | 2.70E-06 | 2.20E-05 |
| AP1S2    | Xp22.2         | -0.23739 | 2.71E-06 | 2.21E-05 |
| POMC     | 2p23.3         | -0.23735 | 2.72E-06 | 2.21E-05 |
| HOXD10   | 2q31.1         | -0.2373  | 2.73E-06 | 2.22E-05 |
| SGCA     | 17q21.33       | -0.23729 | 2.74E-06 | 2.23E-05 |
| CTSL     | 9q21.33        | -0.23725 | 2.75E-06 | 2.23E-05 |
| TSHZ3    | 19q12          | -0.23724 | 2.75E-06 | 2.23E-05 |
| FNTA     | 8p11.21        | -0.23723 | 2.75E-06 | 2.24E-05 |
| FBXL20   | 17q12          | -0.23707 | 2.80E-06 | 2.27E-05 |
| CDH11    | 16q21          | -0.23698 | 2.82E-06 | 2.29E-05 |
| REC8     | 14q12          | 0.236968 | 2.82E-06 | 2.29E-05 |
| TMTC1    | 12p11.22       | -0.23686 | 2.85E-06 | 2.32E-05 |
| USP51    | Xp11.21        | -0.23684 | 2.86E-06 | 2.32E-05 |
| SFRP2    | 4q31.3         | -0.23684 | 2.86E-06 | 2.32E-05 |
| CAV1     | 7q31.2         | -0.23681 | 2.87E-06 | 2.32E-05 |
| SCHIP1   | 3q25.32-q25.33 | -0.2368  | 2.87E-06 | 2.33E-05 |
| SMG9     | 19q13.31       | 0.236712 | 2.90E-06 | 2.35E-05 |
| AGTPBP1  | 9q21.33        | 0.23669  | 2.90E-06 | 2.35E-05 |
| IRF2     | 4q35.1         | -0.23669 | 2.90E-06 | 2.35E-05 |
| VARS2    | 6p21.33        | 0.236661 | 2.91E-06 | 2.35E-05 |
| TLR1     | 4p14           | -0.23666 | 2.91E-06 | 2.35E-05 |
| TSPY26P  | 20q11.21       | -0.23664 | 2.92E-06 | 2.36E-05 |
| FANCM    | 14q21.2        | 0.236472 | 2.97E-06 | 2.40E-05 |
| SCN2B    | 11q23.3        | -0.23645 | 2.97E-06 | 2.40E-05 |
| CCDC85A  | 2p16.1         | -0.23644 | 2.98E-06 | 2.40E-05 |
| MID1IP1  | Xp11.4         | 0.236409 | 2.99E-06 | 2.41E-05 |
| ZNF521   | 18q11.2        | -0.23641 | 2.99E-06 | 2.41E-05 |
| CDC42BPG | 11q13.1        | 0.236403 | 2.99E-06 | 2.41E-05 |
| SEZ6L    | 22q12.1        | -0.23638 | 2.99E-06 | 2.41E-05 |
| VAMP8    | 2p11.2         | -0.23636 | 3.00E-06 | 2.42E-05 |
| HTRA1    | 10q26.13       | -0.23635 | 3.00E-06 | 2.42E-05 |
| FBLN7    | 2q13-q14.1     | -0.23632 | 3.01E-06 | 2.42E-05 |
| HRH1     | 3p25.3         | -0.23632 | 3.01E-06 | 2.42E-05 |
| KCTD11   | 17p13.1        | -0.23625 | 3.03E-06 | 2.44E-05 |

|          |             |          |          |          |
|----------|-------------|----------|----------|----------|
| SRP14P1  | 12p13.31    | -0.23622 | 3.04E-06 | 2.45E-05 |
| DHX37    | 12q24.31    | 0.236206 | 3.05E-06 | 2.45E-05 |
| HVCN1    | 12q24.11    | -0.23618 | 3.05E-06 | 2.45E-05 |
| SEPTIN10 | 2q13        | -0.23617 | 3.06E-06 | 2.45E-05 |
| FZD7     | 2q33.1      | -0.23609 | 3.08E-06 | 2.47E-05 |
| DDIT4L   | 4q24        | -0.23609 | 3.08E-06 | 2.47E-05 |
| GTF2IRD2 | 7q11.23     | -0.23607 | 3.09E-06 | 2.48E-05 |
| SELENOO  | 22q13.33    | 0.236029 | 3.10E-06 | 2.48E-05 |
| BBS1     | 11q13.2     | -0.23596 | 3.12E-06 | 2.50E-05 |
| FASTK    | 7q36.1      | 0.235958 | 3.12E-06 | 2.50E-05 |
| OSBPL8   | 12q21.2     | -0.2359  | 3.14E-06 | 2.51E-05 |
| PLEKHO1  | 1q21.2      | -0.23588 | 3.15E-06 | 2.52E-05 |
| F8       | Xq28        | -0.23583 | 3.16E-06 | 2.53E-05 |
| PAX1     | 20p11.22    | -0.23582 | 3.16E-06 | 2.53E-05 |
| TMEM230  | 20p13-p12.3 | -0.2358  | 3.17E-06 | 2.54E-05 |
| RNF7     | 3q23        | -0.23575 | 3.19E-06 | 2.55E-05 |
| GJA1     | 6q22.31     | -0.23572 | 3.20E-06 | 2.55E-05 |
| BCAP29   | 7q22.3      | -0.23571 | 3.20E-06 | 2.55E-05 |
| EMP3     | 19q13.33    | -0.2357  | 3.20E-06 | 2.56E-05 |
| TAX1BP3  | 17p13.2     | -0.23567 | 3.21E-06 | 2.56E-05 |
| GPC1     | 2q37.3      | -0.23565 | 3.22E-06 | 2.57E-05 |
| CGGBP1   | 3p11.1      | -0.23563 | 3.22E-06 | 2.57E-05 |
| CYSLTR1  | Xq21.1      | -0.23561 | 3.23E-06 | 2.57E-05 |
| NUTM1    | 15q14       | 0.235599 | 3.23E-06 | 2.58E-05 |
| ADAMTSL2 | 9q34.2      | -0.23558 | 3.24E-06 | 2.58E-05 |
| RGS19    | 20q13.33    | -0.23552 | 3.26E-06 | 2.59E-05 |
| CX3CL1   | 16q21       | -0.23549 | 3.27E-06 | 2.60E-05 |
| MDP1     | 14q12       | -0.23547 | 3.28E-06 | 2.60E-05 |
| TMEM35A  | Xq22.1      | -0.23542 | 3.29E-06 | 2.62E-05 |
| CDK3     | 17q25.1     | 0.235346 | 3.32E-06 | 2.63E-05 |
| CYP2U1   | 4q25        | -0.23534 | 3.32E-06 | 2.64E-05 |
| GREM2    | 1q43        | -0.23533 | 3.32E-06 | 2.64E-05 |
| PCDHA3   | 5q31.3      | -0.23527 | 3.34E-06 | 2.65E-05 |
| LIPC     | 15q21.3     | -0.23524 | 3.35E-06 | 2.66E-05 |
| RNF181   | 2p11.2      | -0.23524 | 3.35E-06 | 2.66E-05 |
| IZUMO4   | 19p13.3     | 0.235209 | 3.36E-06 | 2.66E-05 |
| DENND1A  | 9q33.3      | 0.235154 | 3.38E-06 | 2.68E-05 |
| SHOC2    | 10q25.2     | -0.23508 | 3.40E-06 | 2.69E-05 |
| MRPL33   | 2p23.2      | -0.23505 | 3.41E-06 | 2.70E-05 |
| TUBGCP4  | 15q15.3     | 0.235015 | 3.43E-06 | 2.71E-05 |
| PRRC2B   | 9q34.13     | 0.235005 | 3.43E-06 | 2.71E-05 |
| TCEAL3   | Xq22.2      | -0.23495 | 3.45E-06 | 2.73E-05 |
| CLIP3    | 19q13.12    | -0.2349  | 3.47E-06 | 2.74E-05 |
| MEAF6    | 1p34.3      | -0.2349  | 3.47E-06 | 2.74E-05 |
| CORO2A   | 9q22.33     | 0.234877 | 3.47E-06 | 2.74E-05 |
| RNF150   | 4q31.21     | -0.23486 | 3.48E-06 | 2.75E-05 |
| ITGA11   | 15q23       | -0.23485 | 3.48E-06 | 2.75E-05 |
| NPTXR    | 22q13.1     | -0.2348  | 3.50E-06 | 2.76E-05 |
| ASB2     | 14q32.12    | -0.23472 | 3.53E-06 | 2.78E-05 |
| RSPO2    | 8q23.1      | -0.23471 | 3.53E-06 | 2.78E-05 |
| JAKMIP2  | 5q32        | -0.2347  | 3.53E-06 | 2.78E-05 |
| C16ORF89 | 16p13.3     | -0.23468 | 3.54E-06 | 2.79E-05 |
| TCTE3    | 6q27        | 0.234643 | 3.55E-06 | 2.80E-05 |
| ARNT2    | 15q25.1     | -0.23457 | 3.58E-06 | 2.82E-05 |
| LSP1P5   | 1q21.1      | -0.23449 | 3.61E-06 | 2.84E-05 |
| SYT2     | 1q32.1      | 0.234467 | 3.62E-06 | 2.84E-05 |
| UBE2E2   | 3p24.3      | -0.23446 | 3.62E-06 | 2.84E-05 |
| AIFM2    | 10q22.1     | 0.234429 | 3.63E-06 | 2.85E-05 |

|            |                 |          |          |          |
|------------|-----------------|----------|----------|----------|
| LPXN       | 11q12.1         | -0.23438 | 3.65E-06 | 2.86E-05 |
| EYA2       | 20q13.12        | -0.23427 | 3.69E-06 | 2.89E-05 |
| PHACTR3    | 20q13.32-q13.33 | -0.23426 | 3.69E-06 | 2.89E-05 |
| DLG3       | Xq13.1          | 0.234262 | 3.69E-06 | 2.89E-05 |
| C9ORF116   | 9q34.3          | 0.234256 | 3.69E-06 | 2.89E-05 |
| SLITRK4    | Xq27.3          | -0.2342  | 3.71E-06 | 2.91E-05 |
| MOAP1      | 14q32.12        | -0.23418 | 3.72E-06 | 2.91E-05 |
| NBPF11     | 1q21.2          | 0.23415  | 3.73E-06 | 2.92E-05 |
| XPNPEP2    | Xq26.1          | -0.23411 | 3.75E-06 | 2.93E-05 |
| SIGMAR1    | 9p13.3          | 0.234061 | 3.76E-06 | 2.94E-05 |
| EML1       | 14q32.2         | -0.23405 | 3.77E-06 | 2.95E-05 |
| ST6GALNAC5 | 1p31.1          | -0.23402 | 3.78E-06 | 2.95E-05 |
| SEMA3C     | 7q21.11         | -0.23401 | 3.78E-06 | 2.96E-05 |
| FAM32A     | 19p13.11        | -0.23396 | 3.80E-06 | 2.97E-05 |
| KIAA1755   | 20q11.23        | -0.23392 | 3.81E-06 | 2.98E-05 |
| SMIM14     | 4p14            | -0.2339  | 3.82E-06 | 2.99E-05 |
| CST5       | 20p11.21        | -0.23383 | 3.85E-06 | 3.00E-05 |
| CSGALNACT2 | 10q11.21        | -0.23381 | 3.86E-06 | 3.01E-05 |
| INPPL1     | 11q13.4         | 0.233808 | 3.86E-06 | 3.01E-05 |
| C1RL-AS1   | 12p13.31        | 0.233799 | 3.86E-06 | 3.01E-05 |
| ZNF878     | 19p13.2         | 0.233776 | 3.87E-06 | 3.02E-05 |
| INHBB      | 2q14.2          | -0.23377 | 3.87E-06 | 3.02E-05 |
| MAB21L2    | 4q31.3          | -0.23376 | 3.87E-06 | 3.02E-05 |
| SLC25A22   | 11p15.5         | 0.233749 | 3.88E-06 | 3.02E-05 |
| FES        | 15q26.1         | -0.23375 | 3.88E-06 | 3.02E-05 |
| PNMA8B     | 19q13.32        | -0.23374 | 3.88E-06 | 3.02E-05 |
| ANKRD9     | 14q32.31        | 0.233707 | 3.90E-06 | 3.03E-05 |
| CEP83      | 12q22           | 0.23368  | 3.91E-06 | 3.04E-05 |
| EEF1AKMT3  | 12q14.1         | -0.23367 | 3.91E-06 | 3.04E-05 |
| UNC5B      | 10q22.1         | -0.23362 | 3.93E-06 | 3.05E-05 |
| FAP        | 2q24.2          | -0.23354 | 3.96E-06 | 3.07E-05 |
| ZNF660     | 3p21.31         | -0.23353 | 3.96E-06 | 3.07E-05 |
| FAM180A    | 7q33            | -0.23351 | 3.97E-06 | 3.08E-05 |
| ESR1       | 6q25.1-q25.2    | -0.23351 | 3.97E-06 | 3.08E-05 |
| GALNT13    | 2q23.3-q24.1    | -0.23351 | 3.97E-06 | 3.08E-05 |
| ART4       | 12p12.3         | -0.2335  | 3.97E-06 | 3.08E-05 |
| PDGFRL     | 8p22            | -0.23344 | 4.00E-06 | 3.10E-05 |
| PAPSS1     | 4q25            | -0.23343 | 4.00E-06 | 3.10E-05 |
| SMIM7      | 19p13.11        | -0.23332 | 4.05E-06 | 3.13E-05 |
| TWIST1     | 7p21.1          | -0.2333  | 4.05E-06 | 3.14E-05 |
| LINC00479  | 21q22.3         | 0.233285 | 4.06E-06 | 3.14E-05 |
| MPDZ       | 9p23            | -0.23326 | 4.07E-06 | 3.14E-05 |
| STAC2      | 17q12           | -0.23326 | 4.07E-06 | 3.15E-05 |
| SRM        | 1p36.22         | 0.233217 | 4.09E-06 | 3.16E-05 |
| AMZ2       | 17q24.2         | -0.23317 | 4.10E-06 | 3.17E-05 |
| SEMA3G     | 3p21.1          | -0.23316 | 4.11E-06 | 3.17E-05 |
| RASSF7     | 11p15.5         | 0.233143 | 4.12E-06 | 3.18E-05 |
| ITGB1      | 10p11.22        | -0.23309 | 4.14E-06 | 3.19E-05 |
| MAP9       | 4q32.1          | -0.23304 | 4.16E-06 | 3.20E-05 |
| SIRT4      | 12q24.23-q24.31 | -0.23301 | 4.17E-06 | 3.21E-05 |
| MAFB       | 20q12           | -0.23299 | 4.18E-06 | 3.22E-05 |
| ERP27      | 12p12.3         | -0.23298 | 4.18E-06 | 3.22E-05 |
| DMRTA1     | 9p21.3          | -0.23293 | 4.20E-06 | 3.23E-05 |
| LOC202181  | 5q35.3          | 0.232925 | 4.20E-06 | 3.23E-05 |
| CHEK2      | 22q12.1         | 0.23288  | 4.22E-06 | 3.25E-05 |
| PSMG4      | 6p25.2          | 0.232872 | 4.23E-06 | 3.25E-05 |
| TEF        | 22q13.2         | -0.23283 | 4.24E-06 | 3.26E-05 |
| LRRC56     | 11p15.5         | 0.232741 | 4.28E-06 | 3.29E-05 |

|            |                |          |          |          |
|------------|----------------|----------|----------|----------|
| IQCA1      | 2q37.2-q37.3   | -0.23273 | 4.28E-06 | 3.29E-05 |
| BVES       | 6q21           | -0.23267 | 4.31E-06 | 3.31E-05 |
| TRIM52     | 5q35.3         | 0.23264  | 4.32E-06 | 3.32E-05 |
| PLXDC2     | 10p12.31       | -0.23262 | 4.33E-06 | 3.32E-05 |
| CHRNE      | 17p13.2        | -0.23259 | 4.35E-06 | 3.33E-05 |
| ARHGAP20   | 11q22.3-q23.1  | -0.23256 | 4.36E-06 | 3.34E-05 |
| DSCAML1    | 11q23.3        | -0.23255 | 4.36E-06 | 3.34E-05 |
| RGN        | Xp11.3         | -0.23253 | 4.37E-06 | 3.35E-05 |
| NLGN4X     | Xp22.32-p22.31 | -0.23251 | 4.38E-06 | 3.35E-05 |
| DBF4       | 7q21.12        | 0.232491 | 4.39E-06 | 3.36E-05 |
| BRD8       | 5q31.2         | 0.232466 | 4.40E-06 | 3.36E-05 |
| FCGR2B     | 1q23.3         | -0.23244 | 4.41E-06 | 3.37E-05 |
| POMT2      | 14q24.3        | 0.232424 | 4.42E-06 | 3.38E-05 |
| ARRDC1-AS1 | 9q34.3         | 0.232328 | 4.46E-06 | 3.41E-05 |
| URAHP      | 16q24.3        | 0.23231  | 4.46E-06 | 3.41E-05 |
| PPFIA4     | 1q32.1         | 0.232285 | 4.48E-06 | 3.42E-05 |
| ATP6V1H    | 8q11.23        | -0.23225 | 4.49E-06 | 3.43E-05 |
| P4HA3      | 11q13.4        | -0.23219 | 4.52E-06 | 3.45E-05 |
| CD52       | 1p36.11        | -0.23217 | 4.52E-06 | 3.45E-05 |
| USP44      | 12q22          | -0.23217 | 4.53E-06 | 3.45E-05 |
| TMEM59L    | 19p13.11       | -0.23213 | 4.54E-06 | 3.46E-05 |
| ZFC3H1     | 12q21.1        | 0.232041 | 4.58E-06 | 3.49E-05 |
| RPS6KA4    | 11q13.1        | 0.232001 | 4.60E-06 | 3.50E-05 |
| VGLL3      | 3p12.1         | -0.23198 | 4.61E-06 | 3.51E-05 |
| NF2        | 22q12.2        | 0.231972 | 4.61E-06 | 3.51E-05 |
| APOC2      | 19q13.32       | -0.23192 | 4.64E-06 | 3.53E-05 |
| CD9        | 12p13.31       | -0.23181 | 4.68E-06 | 3.56E-05 |
| LITAF      | 16p13.13       | -0.23171 | 4.73E-06 | 3.60E-05 |
| COL26A1    | 7q22.1         | -0.23164 | 4.76E-06 | 3.62E-05 |
| TRIM25     | 17q22          | 0.231599 | 4.78E-06 | 3.63E-05 |
| GCA        | 2q24.2         | -0.23158 | 4.79E-06 | 3.64E-05 |
| CNOT8      | 5q33.2         | -0.23158 | 4.79E-06 | 3.64E-05 |
| EVC2       | 4p16.2         | -0.23153 | 4.82E-06 | 3.65E-05 |
| ARSK       | 5q15           | -0.23152 | 4.82E-06 | 3.66E-05 |
| FBXO41     | 2p13.2         | 0.231434 | 4.86E-06 | 3.68E-05 |
| INSYN1     | 15q24.1        | -0.23143 | 4.86E-06 | 3.68E-05 |
| DEPDC5     | 22q12.2-q12.3  | 0.231428 | 4.86E-06 | 3.68E-05 |
| TMEM74     | 8q23.1         | -0.23142 | 4.87E-06 | 3.69E-05 |
| ENSA       | 1q21.3         | 0.231345 | 4.90E-06 | 3.71E-05 |
| TMEM86A    | 11p15.1        | -0.2313  | 4.92E-06 | 3.73E-05 |
| MMP13      | 11q22.2        | -0.23129 | 4.93E-06 | 3.73E-05 |
| C1ORF131   | 1q42.2         | 0.231282 | 4.93E-06 | 3.73E-05 |
| EPPK1      | 8q24.3         | 0.231257 | 4.94E-06 | 3.74E-05 |
| STOM       | 9q33.2         | -0.23119 | 4.98E-06 | 3.76E-05 |
| GCOM1      | 15q21.3        | -0.23119 | 4.98E-06 | 3.76E-05 |
| KLHL28     | 14q21.2        | -0.23114 | 5.00E-06 | 3.78E-05 |
| FBXO2      | 1p36.22        | -0.23112 | 5.01E-06 | 3.78E-05 |
| BEND5      | 1p33           | -0.23112 | 5.01E-06 | 3.78E-05 |
| KCND2      | 7q31.31        | -0.23111 | 5.01E-06 | 3.78E-05 |
| PIIF       | 10q22.3        | 0.2311   | 5.02E-06 | 3.78E-05 |
| TIMMDC1    | 3q13.33        | -0.23107 | 5.04E-06 | 3.80E-05 |
| TUBA1C     | 12q13.12       | 0.231048 | 5.05E-06 | 3.80E-05 |
| KBTBD4     | 11p11.2        | -0.23102 | 5.06E-06 | 3.81E-05 |
| KCTD16     | 5q31.3         | -0.231   | 5.07E-06 | 3.82E-05 |
| SPIN1      | 9q22.1         | -0.23096 | 5.09E-06 | 3.83E-05 |
| AQP6       | 12q13.12       | 0.230859 | 5.14E-06 | 3.86E-05 |
| RBP7       | 1p36.22        | -0.23085 | 5.14E-06 | 3.87E-05 |
| BORCS7     | 10q24.32       | -0.23085 | 5.14E-06 | 3.87E-05 |

|             |                 |          |          |          |
|-------------|-----------------|----------|----------|----------|
| PECAM1      | 17q23.3         | -0.23084 | 5.15E-06 | 3.87E-05 |
| SLC23A3     | 2q35            | 0.230721 | 5.21E-06 | 3.91E-05 |
| YPEL1       | 22q11.21-q11.22 | -0.23072 | 5.21E-06 | 3.91E-05 |
| TMEM190     | 19q13.42        | 0.230655 | 5.24E-06 | 3.93E-05 |
| PWP2        | 21q22.3         | 0.230638 | 5.25E-06 | 3.94E-05 |
| NAV3        | 12q21.2         | -0.23064 | 5.25E-06 | 3.94E-05 |
| CPN2        | 3q29            | -0.23063 | 5.25E-06 | 3.94E-05 |
| GOLGA8A     | 15q14           | 0.230623 | 5.26E-06 | 3.94E-05 |
| LONRF2      | 2q11.2          | -0.23061 | 5.27E-06 | 3.94E-05 |
| EDNRB       | 13q22.3         | -0.23059 | 5.27E-06 | 3.95E-05 |
| SEC22B      | 1p12            | -0.23058 | 5.28E-06 | 3.95E-05 |
| TMEM233     | 12q24.23        | -0.23058 | 5.28E-06 | 3.95E-05 |
| KCNK2       | 1q41            | -0.23057 | 5.28E-06 | 3.95E-05 |
| PRR7        | 5q35.3          | 0.230553 | 5.29E-06 | 3.96E-05 |
| TPRN        | 9q34.3          | 0.230552 | 5.29E-06 | 3.96E-05 |
| MMP11       | 22q11.23        | -0.23051 | 5.32E-06 | 3.97E-05 |
| SNX11       | 17q21.32        | -0.23044 | 5.35E-06 | 4.00E-05 |
| CDH19       | 18q22.1         | -0.23043 | 5.35E-06 | 4.00E-05 |
| ASB3        | 2p16.2          | -0.23041 | 5.37E-06 | 4.01E-05 |
| IZUMO1      | 19q13.33        | 0.23038  | 5.38E-06 | 4.01E-05 |
| DUSP12      | 1q23.3          | 0.230357 | 5.39E-06 | 4.02E-05 |
| SLITRK3     | 3q26.1          | -0.23032 | 5.41E-06 | 4.03E-05 |
| C10ORF12    | 10q24.1         | 0.230306 | 5.42E-06 | 4.04E-05 |
| SET         | 9q34.11         | 0.230302 | 5.42E-06 | 4.04E-05 |
| SEPTIN7     | 7p14.2          | -0.23027 | 5.44E-06 | 4.05E-05 |
| TYROBP      | 19q13.12        | -0.23026 | 5.44E-06 | 4.05E-05 |
| JTB         | 1q21.3          | 0.230211 | 5.47E-06 | 4.07E-05 |
| EPB41L4A-DT | 5q22.2          | -0.2302  | 5.48E-06 | 4.07E-05 |
| SCN3A       | 2q24.3          | -0.23016 | 5.50E-06 | 4.09E-05 |
| HDAC9       | 7p21.1          | -0.23011 | 5.52E-06 | 4.10E-05 |
| PLXNA3      | Xq28            | 0.230103 | 5.53E-06 | 4.11E-05 |
| U2AF1       | 21q22.3         | 0.23006  | 5.55E-06 | 4.12E-05 |
| CNNM4       | 2q11.2          | 0.230045 | 5.56E-06 | 4.13E-05 |
| CNR1        | 6q15            | -0.23002 | 5.57E-06 | 4.14E-05 |
| ZNF25       | 10p11.21        | -0.22997 | 5.60E-06 | 4.15E-05 |
| OLFML2B     | 1q23.3          | -0.22995 | 5.61E-06 | 4.16E-05 |
| KMT5C       | 19q13.42        | 0.22992  | 5.63E-06 | 4.17E-05 |
| MLEC        | 12q24.31        | 0.229914 | 5.63E-06 | 4.17E-05 |
| THUMPD3-AS1 | 3p25.3          | 0.229901 | 5.64E-06 | 4.17E-05 |
| MALAT1      | 11q13.1         | 0.229869 | 5.65E-06 | 4.19E-05 |
| SENP5       | 3q29            | 0.229846 | 5.67E-06 | 4.19E-05 |
| FAM220A     | 7p22.1          | -0.22983 | 5.68E-06 | 4.20E-05 |
| ZNF324B     | 19q13.43        | 0.229783 | 5.70E-06 | 4.22E-05 |
| XPO1        | 2p15            | 0.229767 | 5.71E-06 | 4.22E-05 |
| CLDN5       | 22q11.21        | -0.22971 | 5.74E-06 | 4.24E-05 |
| CEP192      | 18p11.21        | 0.229679 | 5.76E-06 | 4.25E-05 |
| FGF10       | 5p12            | -0.22962 | 5.79E-06 | 4.27E-05 |
| GALNS       | 16q24.3         | -0.22962 | 5.79E-06 | 4.27E-05 |
| HLCS        | 21q22.13        | 0.229616 | 5.79E-06 | 4.27E-05 |
| ZC3H10      | 12q13.2         | -0.22962 | 5.79E-06 | 4.27E-05 |
| PXDC1       | 6p25.2          | -0.22961 | 5.79E-06 | 4.27E-05 |
| TRIM61      | 4q32.3          | -0.22956 | 5.82E-06 | 4.29E-05 |
| CALM3       | 19q13.32        | 0.22955  | 5.83E-06 | 4.30E-05 |
| ARL4D       | 17q21.31        | -0.22952 | 5.85E-06 | 4.31E-05 |
| CEP89       | 19q13.11        | 0.229505 | 5.85E-06 | 4.31E-05 |
| WIZ         | 19p13.12        | 0.229469 | 5.88E-06 | 4.32E-05 |
| WWC2-AS2    | 4q35.1          | -0.22947 | 5.88E-06 | 4.32E-05 |
| THYN1       | 11q25           | -0.22943 | 5.90E-06 | 4.34E-05 |

|            |             |          |          |          |
|------------|-------------|----------|----------|----------|
| CASZ1      | 1p36.22     | 0.229417 | 5.90E-06 | 4.34E-05 |
| TMEM179B   | 11q12.3     | -0.22937 | 5.93E-06 | 4.36E-05 |
| FAM20B     | 1q25.2      | 0.229356 | 5.94E-06 | 4.36E-05 |
| ARPC2      | 2q35        | -0.22932 | 5.96E-06 | 4.38E-05 |
| SERPINF2   | 17p13.3     | -0.22929 | 5.97E-06 | 4.38E-05 |
| ANAPC13    | 3q22.2      | -0.22929 | 5.98E-06 | 4.38E-05 |
| LPAR4      | Xq21.1      | -0.22924 | 6.01E-06 | 4.41E-05 |
| MSR1       | 8p22        | -0.22916 | 6.05E-06 | 4.44E-05 |
| SDHAF2     | 11q12.2     | -0.22914 | 6.06E-06 | 4.44E-05 |
| TOR4A      | 9q34.3      | 0.22914  | 6.06E-06 | 4.44E-05 |
| ABCB4      | 7q21.12     | -0.22914 | 6.07E-06 | 4.44E-05 |
| RBM12B-AS1 | 8q22.1      | 0.2291   | 6.09E-06 | 4.46E-05 |
| FBXL18     | 7p22.1      | 0.229044 | 6.12E-06 | 4.48E-05 |
| OSMR       | 5p13.1      | -0.22901 | 6.14E-06 | 4.49E-05 |
| NUP153     | 6p22.3      | 0.228996 | 6.15E-06 | 4.50E-05 |
| AMIGO2     | 12q13.11    | -0.22897 | 6.17E-06 | 4.51E-05 |
| IBA57      | 1q42.13     | 0.228958 | 6.17E-06 | 4.51E-05 |
| CABCOCO1   | 10q21.2     | -0.2289  | 6.20E-06 | 4.53E-05 |
| NKX3-2     | 4p15.33     | -0.2289  | 6.21E-06 | 4.53E-05 |
| MAN2A2     | 15q26.1     | 0.228833 | 6.24E-06 | 4.56E-05 |
| FAM3C      | 7q31.31     | -0.22881 | 6.26E-06 | 4.57E-05 |
| DOCK6      | 19p13.2     | 0.228731 | 6.31E-06 | 4.60E-05 |
| SNORA81    | 3q27.3      | 0.228698 | 6.33E-06 | 4.61E-05 |
| SFPQ       | 1p34.3      | 0.228652 | 6.35E-06 | 4.63E-05 |
| CDK11B     | 1p36.33     | 0.228636 | 6.36E-06 | 4.64E-05 |
| EPC2       | 2q23.1      | -0.22859 | 6.39E-06 | 4.66E-05 |
| BEX1       | Xq22.1 Xq22 | -0.22857 | 6.40E-06 | 4.66E-05 |
| DDHD2      | 8p11.23     | -0.22854 | 6.42E-06 | 4.67E-05 |
| PCDHB15    | 5q31.3      | -0.22853 | 6.43E-06 | 4.68E-05 |
| NSMF       | 9q34.3      | 0.22849  | 6.45E-06 | 4.69E-05 |
| MLLT1      | 19p13.3     | 0.228481 | 6.46E-06 | 4.70E-05 |
| FBXL17     | 5q21.3      | -0.22845 | 6.48E-06 | 4.71E-05 |
| RAB33B     | 4q31.1      | -0.22842 | 6.50E-06 | 4.72E-05 |
| TNFSF13B   | 13q33.3     | -0.22842 | 6.50E-06 | 4.72E-05 |
| RNF139     | 8q24.13     | -0.22841 | 6.50E-06 | 4.72E-05 |
| GGCT       | 7p14.3      | 0.228384 | 6.52E-06 | 4.73E-05 |
| FXVD2      | 11q23.3     | -0.22834 | 6.55E-06 | 4.75E-05 |
| ADAMTS3    | 4q13.3      | -0.22831 | 6.56E-06 | 4.76E-05 |
| FOXRED1    | 11q24.2     | 0.228303 | 6.57E-06 | 4.76E-05 |
| ZNF222     | 19q13.31    | -0.22828 | 6.59E-06 | 4.77E-05 |
| NCAM2      | 21q21.1     | -0.22826 | 6.60E-06 | 4.78E-05 |
| HLA-DOA    | 6p21.32     | -0.22823 | 6.61E-06 | 4.79E-05 |
| CCN5       | 20q13.12    | -0.22822 | 6.62E-06 | 4.79E-05 |
| C1ORF74    | 1q32.2      | 0.228191 | 6.64E-06 | 4.81E-05 |
| PKD2       | 4q22.1      | -0.22816 | 6.66E-06 | 4.82E-05 |
| CIZ1       | 9q34.11     | 0.228156 | 6.66E-06 | 4.82E-05 |
| MOB3C      | 1p33        | -0.22815 | 6.66E-06 | 4.82E-05 |
| EIF4A2     | 3q27.3      | -0.22813 | 6.68E-06 | 4.83E-05 |
| PLP1       | Xq22.2      | -0.22812 | 6.69E-06 | 4.83E-05 |
| SERPINE2   | 2q36.1      | -0.22804 | 6.74E-06 | 4.87E-05 |
| NGF        | 1p13.2      | -0.22803 | 6.74E-06 | 4.87E-05 |
| MAL        | 2q11.1      | -0.22798 | 6.77E-06 | 4.89E-05 |
| SEC31A     | 4q21.22     | -0.22797 | 6.78E-06 | 4.89E-05 |
| ZMAT4      | 8p11.21     | -0.22796 | 6.79E-06 | 4.89E-05 |
| BCL2L1     | 20q11.21    | -0.22794 | 6.80E-06 | 4.90E-05 |
| ERI2       | 16p12.3     | 0.227875 | 6.84E-06 | 4.93E-05 |
| RRP7BP     | 22q13.2     | 0.227852 | 6.86E-06 | 4.94E-05 |
| CILP       | 15q22.31    | -0.22784 | 6.87E-06 | 4.94E-05 |

|           |          |          |          |          |
|-----------|----------|----------|----------|----------|
| ZFYVE27   | 10q24.2  | 0.227836 | 6.87E-06 | 4.94E-05 |
| GPRC5B    | 16p12.3  | -0.22779 | 6.90E-06 | 4.96E-05 |
| FBXL3     | 13q22.3  | -0.22779 | 6.90E-06 | 4.96E-05 |
| TAZ       | Xq28     | 0.227772 | 6.91E-06 | 4.97E-05 |
| PHOSPHO2  | 2q31.1   | -0.22776 | 6.92E-06 | 4.97E-05 |
| CCDC77    | 12p13.33 | 0.227747 | 6.93E-06 | 4.98E-05 |
| TLR3      | 4q35.1   | -0.22765 | 6.99E-06 | 5.02E-05 |
| TRPM5     | 11p15.5  | 0.22761  | 7.02E-06 | 5.04E-05 |
| RDH14     | 2p24.2   | -0.22758 | 7.04E-06 | 5.05E-05 |
| CCDC89    | 11q14.1  | -0.22757 | 7.05E-06 | 5.05E-05 |
| CSRNP2    | 12q13.12 | -0.22757 | 7.05E-06 | 5.05E-05 |
| DUSP26    | 8p12     | -0.22756 | 7.05E-06 | 5.05E-05 |
| HIGD1B    | 17q21.31 | -0.22754 | 7.06E-06 | 5.06E-05 |
| GDE1      | 16p12.3  | -0.22751 | 7.08E-06 | 5.08E-05 |
| CYP2W1    | 7p22.3   | -0.22747 | 7.11E-06 | 5.10E-05 |
| SEPTIN8   | 5q31.1   | 0.227453 | 7.12E-06 | 5.10E-05 |
| KCNMB1    | 5q35.1   | -0.22745 | 7.13E-06 | 5.10E-05 |
| AMACR     | 5p13.2   | -0.22745 | 7.13E-06 | 5.10E-05 |
| IL13RA1   | Xq24     | -0.22742 | 7.15E-06 | 5.11E-05 |
| PCDH9     | 13q21.32 | -0.22739 | 7.17E-06 | 5.13E-05 |
| POLRMT    | 19p13.3  | 0.227364 | 7.18E-06 | 5.14E-05 |
| MORN5     | 9q33.2   | -0.22733 | 7.21E-06 | 5.15E-05 |
| PRKCQ     | 10p15.1  | -0.22733 | 7.21E-06 | 5.15E-05 |
| LOC374443 | 12p13.31 | -0.22732 | 7.22E-06 | 5.15E-05 |
| PLD3      | 19q13.2  | -0.2273  | 7.23E-06 | 5.16E-05 |
| RNF212    | 4p16.3   | -0.2273  | 7.23E-06 | 5.16E-05 |
| FBXO27    | 19q13.2  | -0.22729 | 7.23E-06 | 5.16E-05 |
| ADGRB3    | 6q12-q13 | -0.22729 | 7.23E-06 | 5.16E-05 |
| LIF       | 22q12.2  | 0.227277 | 7.24E-06 | 5.16E-05 |
| TGFB3     | 14q24.3  | -0.22726 | 7.26E-06 | 5.17E-05 |
| OSBPL6    | 2q31.2   | -0.22721 | 7.29E-06 | 5.19E-05 |
| BGN       | Xq28     | -0.22721 | 7.29E-06 | 5.19E-05 |
| ASB16-AS1 | 17q21.31 | 0.227191 | 7.30E-06 | 5.20E-05 |
| BHLHE22   | 8q12.3   | -0.22713 | 7.34E-06 | 5.22E-05 |
| BBS4      | 15q24.1  | -0.22713 | 7.34E-06 | 5.22E-05 |
| TGM1      | 14q12    | 0.227128 | 7.35E-06 | 5.22E-05 |
| SCN4B     | 11q23.3  | -0.22706 | 7.39E-06 | 5.25E-05 |
| SLC22A13  | 3p22.2   | 0.22706  | 7.40E-06 | 5.25E-05 |
| NBPF9     | 1q21.2   | 0.227043 | 7.41E-06 | 5.26E-05 |
| BACH2     | 6q15     | -0.22704 | 7.41E-06 | 5.26E-05 |
| MROH6     | 8q24.3   | 0.227    | 7.44E-06 | 5.28E-05 |
| ZMYND12   | 1p34.2   | -0.22698 | 7.45E-06 | 5.28E-05 |
| CYP3A4    | 7q22.1   | -0.22694 | 7.48E-06 | 5.31E-05 |
| WWC2      | 4q35.1   | -0.22691 | 7.50E-06 | 5.32E-05 |
| TMEM183A  | 1q32.1   | 0.22681  | 7.57E-06 | 5.37E-05 |
| ERN2      | 16p12.2  | 0.226785 | 7.59E-06 | 5.38E-05 |
| PRMT2     | 21q22.3  | -0.22677 | 7.60E-06 | 5.38E-05 |
| HLA-DQB2  | 6p21.32  | -0.22672 | 7.64E-06 | 5.41E-05 |
| WFIKKN1   | 16p13.3  | 0.226706 | 7.65E-06 | 5.41E-05 |
| C19ORF57  | 19p13.12 | 0.226696 | 7.66E-06 | 5.42E-05 |
| CDK18     | 1q32.1   | 0.22668  | 7.67E-06 | 5.42E-05 |
| HNRNPH1   | 5q35.3   | 0.226667 | 7.68E-06 | 5.43E-05 |
| TP53INP2  | 20q11.22 | -0.22663 | 7.70E-06 | 5.44E-05 |
| CEP68     | 2p14     | -0.22656 | 7.76E-06 | 5.48E-05 |
| PRIMPOL   | 4q35.1   | -0.22655 | 7.76E-06 | 5.48E-05 |
| EXPH5     | 11q22.3  | 0.226507 | 7.79E-06 | 5.50E-05 |
| AKT3      | 1q43-q44 | -0.22648 | 7.81E-06 | 5.51E-05 |
| CASC4     | 15q15.3  | -0.22647 | 7.82E-06 | 5.51E-05 |



|              |                    |          |          |          |
|--------------|--------------------|----------|----------|----------|
| GHDC         | 17q21.2            | -0.22642 | 7.86E-06 | 5.54E-05 |
| TBCD         | 17q25.3            | 0.226366 | 7.90E-06 | 5.57E-05 |
| MAP1A        | 15q15.3            | -0.22636 | 7.91E-06 | 5.57E-05 |
| ADAMTS16     | 5p15.32            | -0.22631 | 7.94E-06 | 5.59E-05 |
| RAD23A       | 19p13.13           | 0.225984 | 8.19E-06 | 5.77E-05 |
| HKDC1        | 10q22.1            | 0.225891 | 8.26E-06 | 5.82E-05 |
| CHST10       | 2q11.2             | -0.22587 | 8.27E-06 | 5.82E-05 |
| TNFAIP6      | 2q23.3             | -0.2258  | 8.33E-06 | 5.86E-05 |
| LAMTOR1      | 11q13.4            | -0.22568 | 8.42E-06 | 5.92E-05 |
| PAK4         | 19q13.2            | 0.225683 | 8.43E-06 | 5.92E-05 |
| SMIM20       | 4p15.2             | -0.22568 | 8.43E-06 | 5.92E-05 |
| NBDY         | Xp11.21            | -0.22565 | 8.45E-06 | 5.94E-05 |
| HEY2         | 6q22.31            | -0.22563 | 8.47E-06 | 5.94E-05 |
| SETBP1       | 18q12.3            | -0.22563 | 8.47E-06 | 5.94E-05 |
| FBLN2        | 3p25.1             | -0.22562 | 8.48E-06 | 5.95E-05 |
| CADM3        | 1q23.2             | -0.22561 | 8.48E-06 | 5.95E-05 |
| TMEM63A      | 1q42.12            | 0.225601 | 8.49E-06 | 5.95E-05 |
| SH2B1        | 16p11.2            | 0.225585 | 8.50E-06 | 5.96E-05 |
| COL14A1      | 8q24.12            | -0.22558 | 8.51E-06 | 5.96E-05 |
| RBL1         | 20q11.23           | 0.225515 | 8.56E-06 | 6.00E-05 |
| NCAM1        | 11q23.2            | -0.22549 | 8.58E-06 | 6.01E-05 |
| MSANTD2      | 11q24.2            | 0.225479 | 8.59E-06 | 6.01E-05 |
| CLPP         | 19p13.3            | 0.225451 | 8.61E-06 | 6.03E-05 |
| AP1S3        | 2q36.1             | 0.225426 | 8.63E-06 | 6.04E-05 |
| MEDAG        | 13q12.3            | -0.22542 | 8.64E-06 | 6.04E-05 |
| ARHGAP39     | 8q24.3             | 0.225271 | 8.76E-06 | 6.12E-05 |
| SUN1         | 7p22.3             | 0.225264 | 8.77E-06 | 6.12E-05 |
| DIRAS3       | 1p31.3             | -0.22524 | 8.79E-06 | 6.14E-05 |
| CHN2         | 7p14.3             | -0.22521 | 8.81E-06 | 6.15E-05 |
| C11ORF1      | 11q23.1            | -0.22518 | 8.84E-06 | 6.17E-05 |
| ACER2        | 9p22.1             | -0.22511 | 8.89E-06 | 6.20E-05 |
| MAGI2        | 7q21.11            | -0.2251  | 8.90E-06 | 6.21E-05 |
| TAOK2        | 16p11.2            | 0.225056 | 8.94E-06 | 6.23E-05 |
| TNS1         | 2q35               | -0.22504 | 8.96E-06 | 6.24E-05 |
| DHH          | 12q13.12           | -0.22503 | 8.96E-06 | 6.24E-05 |
| PRSS35       | 6q14.2             | -0.22499 | 8.99E-06 | 6.26E-05 |
| RELN         | 7q22.1             | -0.22498 | 9.00E-06 | 6.27E-05 |
| ANKRA2       | 5q13.2             | -0.22496 | 9.02E-06 | 6.28E-05 |
| PROZ         | 13q34              | 0.224957 | 9.02E-06 | 6.28E-05 |
| CD1E         | 1q23.1             | -0.22493 | 9.04E-06 | 6.29E-05 |
| LINC01119    | 2p21               | -0.2249  | 9.07E-06 | 6.31E-05 |
| AMMECR1      | Xq23               | 0.224876 | 9.09E-06 | 6.32E-05 |
| AFF3         | 2q11.2             | -0.22487 | 9.10E-06 | 6.32E-05 |
| EPHA5        | 4q13.1-q13.2       | -0.22485 | 9.12E-06 | 6.33E-05 |
| CATSPERB     | 14q32.12           | 0.224839 | 9.12E-06 | 6.34E-05 |
| RFPL1S       | 22q12.2            | -0.22483 | 9.13E-06 | 6.34E-05 |
| PRDM10       | 11q24.3            | 0.224827 | 9.13E-06 | 6.34E-05 |
| CCNG2        | 4q21.1             | -0.2248  | 9.16E-06 | 6.35E-05 |
| DHRX         | Xp22.33 and Yp11.2 | -0.22479 | 9.16E-06 | 6.35E-05 |
| C21ORF62-AS1 | 21q22.11           | -0.22478 | 9.17E-06 | 6.36E-05 |
| NTNG1        | 1p13.3             | -0.22477 | 9.18E-06 | 6.36E-05 |
| PAQR7        | 1p36.11            | -0.22476 | 9.19E-06 | 6.37E-05 |
| FBXO33       | 14q21.1            | -0.22474 | 9.21E-06 | 6.38E-05 |
| PRPF4        | 9q32               | 0.224733 | 9.21E-06 | 6.38E-05 |
| C3ORF35      | 3p22.2             | 0.224716 | 9.23E-06 | 6.39E-05 |
| ZNF354B      | 5q35.3             | 0.224678 | 9.26E-06 | 6.41E-05 |
| ELK4         | 1q32.1             | 0.224626 | 9.31E-06 | 6.44E-05 |
| TBC1D3H      | 17q12              | 0.2246   | 9.33E-06 | 6.45E-05 |

|            |               |          |          |          |
|------------|---------------|----------|----------|----------|
| CHRNA3     | 15q25.1       | -0.22456 | 9.36E-06 | 6.47E-05 |
| CDH24      | 14q11.2       | 0.224476 | 9.44E-06 | 6.52E-05 |
| ABCB10     | 1q42.13       | 0.224448 | 9.46E-06 | 6.54E-05 |
| FMOD       | 1q32.1        | -0.22444 | 9.47E-06 | 6.54E-05 |
| GNS        | 12q14.3       | -0.22442 | 9.49E-06 | 6.55E-05 |
| PHETA2     | 22q13.2       | -0.22442 | 9.49E-06 | 6.55E-05 |
| FYTTD1     | 3q29          | -0.22432 | 9.58E-06 | 6.61E-05 |
| C1GALT1C1L | 2p21          | -0.22431 | 9.59E-06 | 6.61E-05 |
| ABCB6      | 2q35          | 0.22431  | 9.59E-06 | 6.61E-05 |
| TNFAIP8L2  | 1q21.3        | -0.22428 | 9.62E-06 | 6.63E-05 |
| GNAO1      | 16q13         | -0.22427 | 9.62E-06 | 6.63E-05 |
| IYD        | 6q25.1        | -0.22425 | 9.64E-06 | 6.64E-05 |
| CTSD       | 11p15.5       | -0.22422 | 9.67E-06 | 6.66E-05 |
| LGI2       | 4p15.2        | -0.2242  | 9.68E-06 | 6.66E-05 |
| PINK1      | 1p36.12       | -0.22418 | 9.71E-06 | 6.68E-05 |
| ZNF37A     | 10p11.1       | 0.224126 | 9.75E-06 | 6.71E-05 |
| LUC7L      | 16p13.3       | 0.224088 | 9.79E-06 | 6.73E-05 |
| WDFY3-AS2  | 4q21.23       | -0.22401 | 9.86E-06 | 6.77E-05 |
| CCDC69     | 5q33.1        | -0.224   | 9.87E-06 | 6.78E-05 |
| POLR2M     | 15q21.3       | -0.22398 | 9.89E-06 | 6.79E-05 |
| SLC7A1     | 13q12.3       | 0.223963 | 9.90E-06 | 6.80E-05 |
| DRAM1      | 12q23.2       | -0.22395 | 9.92E-06 | 6.81E-05 |
| ARMC6      | 19p13.11      | 0.223906 | 9.96E-06 | 6.83E-05 |
| SYPL2      | 1p13.3        | -0.2239  | 9.97E-06 | 6.83E-05 |
| KLHL18     | 3p21.31       | 0.223869 | 9.99E-06 | 6.85E-05 |
| GLB1L      | 2q35          | -0.22386 | 1.00E-05 | 6.85E-05 |
| SMCR5      | -             | 0.22379  | 1.01E-05 | 6.90E-05 |
| CAT        | 11p13         | -0.22371 | 1.01E-05 | 6.95E-05 |
| FHOD3      | 18q12.2       | -0.22368 | 1.02E-05 | 6.96E-05 |
| COL22A1    | 8q24.23-q24.3 | -0.22367 | 1.02E-05 | 6.96E-05 |
| EMILIN1    | 2p23.3        | -0.22365 | 1.02E-05 | 6.98E-05 |
| TRPV4      | 12q24.11      | -0.22364 | 1.02E-05 | 6.98E-05 |
| WFIKKN2    | 17q21.33      | -0.22352 | 1.03E-05 | 7.06E-05 |
| PLCD1      | 3p22.2        | -0.22351 | 1.03E-05 | 7.06E-05 |
| A4GALT     | 22q13.2       | -0.22349 | 1.04E-05 | 7.08E-05 |
| CAP2       | 6p22.3        | -0.22348 | 1.04E-05 | 7.08E-05 |
| CCNI2      | 5q31.1        | 0.223474 | 1.04E-05 | 7.08E-05 |
| APCDD1     | 18p11.22      | -0.22346 | 1.04E-05 | 7.08E-05 |
| HTR3A      | 11q23.2       | -0.22344 | 1.04E-05 | 7.10E-05 |
| ZNF136     | 19p13.2       | -0.22342 | 1.04E-05 | 7.11E-05 |
| PKIB       | 6q22.31       | -0.2234  | 1.04E-05 | 7.12E-05 |
| ZNF20      | 19p13.2       | -0.22337 | 1.05E-05 | 7.13E-05 |
| RORB       | 9q21.13       | -0.22336 | 1.05E-05 | 7.14E-05 |
| MR1        | 1q25.3        | -0.22335 | 1.05E-05 | 7.14E-05 |
| BTF3L4     | 1p32.3        | -0.22332 | 1.05E-05 | 7.16E-05 |
| ROR2       | 9q22.31       | -0.22327 | 1.06E-05 | 7.19E-05 |
| GIPR       | 19q13.32      | 0.223214 | 1.06E-05 | 7.23E-05 |
| DGKI       | 7q33          | -0.2232  | 1.06E-05 | 7.23E-05 |
| HMGB4      | 1p35.1        | -0.2232  | 1.06E-05 | 7.23E-05 |
| MTR        | 1q43          | 0.22311  | 1.07E-05 | 7.29E-05 |
| ATG4B      | 2q37.3        | 0.223034 | 1.08E-05 | 7.34E-05 |
| CDH23      | 10q22.1       | -0.22302 | 1.08E-05 | 7.35E-05 |
| GGT5       | 22q11.23      | -0.22301 | 1.08E-05 | 7.35E-05 |
| SNX7       | 1p21.3        | -0.22298 | 1.09E-05 | 7.37E-05 |
| PTPRT      | 20q12-q13.11  | -0.22295 | 1.09E-05 | 7.39E-05 |
| RNF183     | 9q32          | 0.22292  | 1.09E-05 | 7.41E-05 |
| ZEB2       | 2q22.3        | -0.22291 | 1.09E-05 | 7.41E-05 |
| BFSP2      | 3q22.1        | -0.22291 | 1.09E-05 | 7.41E-05 |

|          |               |          |          |          |
|----------|---------------|----------|----------|----------|
| PARP2    | 14q11.2       | 0.222906 | 1.09E-05 | 7.41E-05 |
| WWC1     | 5q34          | 0.222829 | 1.10E-05 | 7.46E-05 |
| SLC25A28 | 10q24.2       | 0.222778 | 1.11E-05 | 7.49E-05 |
| CSRP2    | 12q21.2       | -0.22277 | 1.11E-05 | 7.49E-05 |
| UBAC1    | 9q34.3        | 0.222763 | 1.11E-05 | 7.50E-05 |
| SCN3B    | 11q24.1       | -0.2227  | 1.11E-05 | 7.54E-05 |
| LRRC3B   | 3p24.1        | -0.22269 | 1.12E-05 | 7.54E-05 |
| PCDHB2   | 5q31.3        | -0.22267 | 1.12E-05 | 7.55E-05 |
| NLGN1    | 3q26.31       | -0.22266 | 1.12E-05 | 7.56E-05 |
| HHIPL1   | 14q32.2       | -0.22259 | 1.13E-05 | 7.60E-05 |
| TIMM17A  | 1q32.1        | 0.222583 | 1.13E-05 | 7.61E-05 |
| SLC25A39 | 17q21.31      | 0.222575 | 1.13E-05 | 7.61E-05 |
| PPIEL    | 1p34.3        | 0.22255  | 1.13E-05 | 7.63E-05 |
| WWTR1    | 3q25.1        | -0.22251 | 1.13E-05 | 7.65E-05 |
| LEF1     | 4q25          | -0.22251 | 1.13E-05 | 7.65E-05 |
| DGKB     | 7p21.2        | -0.22249 | 1.14E-05 | 7.66E-05 |
| NIM1K    | 5p12          | -0.22244 | 1.14E-05 | 7.70E-05 |
| LAPTM5   | 1p35.2        | -0.2224  | 1.15E-05 | 7.72E-05 |
| HDHD3    | 9q32          | 0.222382 | 1.15E-05 | 7.73E-05 |
| LEPR     | 1p31.3        | -0.22235 | 1.15E-05 | 7.75E-05 |
| CHRD     | 3q27.1        | -0.22232 | 1.15E-05 | 7.77E-05 |
| ZNF787   | 19q13.43      | 0.222313 | 1.16E-05 | 7.77E-05 |
| MNS1     | 15q21.3       | 0.222298 | 1.16E-05 | 7.78E-05 |
| NTNG2    | 9q34.13       | -0.22228 | 1.16E-05 | 7.79E-05 |
| TLN2     | 15q22.2       | 0.222282 | 1.16E-05 | 7.79E-05 |
| ATXN7L2  | 1p13.3        | 0.222279 | 1.16E-05 | 7.79E-05 |
| AOC4P    | 17q21.31      | -0.22227 | 1.16E-05 | 7.79E-05 |
| BTG1     | 12q21.33      | -0.22223 | 1.16E-05 | 7.82E-05 |
| SLC2A12  | 6q23.2        | -0.22222 | 1.17E-05 | 7.82E-05 |
| ASPA     | 17p13.2       | -0.22215 | 1.17E-05 | 7.87E-05 |
| C5ORF46  | 5q32          | -0.22213 | 1.18E-05 | 7.88E-05 |
| FRG1     | 4q35.2        | -0.22211 | 1.18E-05 | 7.90E-05 |
| PDXDC1   | 16p13.11      | 0.222094 | 1.18E-05 | 7.90E-05 |
| SMOC2    | 6q27          | -0.22209 | 1.18E-05 | 7.91E-05 |
| MTSS1    | 8q24.13       | -0.22202 | 1.19E-05 | 7.95E-05 |
| TRHDE    | 12q21.1       | -0.22201 | 1.19E-05 | 7.95E-05 |
| TAF1A    | 1q41          | 0.221894 | 1.20E-05 | 8.04E-05 |
| BCAR3    | 1p22.1        | -0.22172 | 1.22E-05 | 8.17E-05 |
| HOXB5    | 17q21.32      | 0.221674 | 1.23E-05 | 8.20E-05 |
| ZCCHC24  | 10q22.3       | -0.22166 | 1.23E-05 | 8.21E-05 |
| FOXF2    | 6p25.3        | -0.22161 | 1.23E-05 | 8.24E-05 |
| EVC      | 4p16.2        | -0.22161 | 1.23E-05 | 8.24E-05 |
| FAM214A  | 15q21.2-q21.3 | -0.22159 | 1.24E-05 | 8.25E-05 |
| PRKAG1   | 12q13.12      | -0.22155 | 1.24E-05 | 8.28E-05 |
| SEL1L    | 14q31.1       | -0.22153 | 1.24E-05 | 8.30E-05 |
| VSTM2L   | 20q11.23      | -0.22152 | 1.24E-05 | 8.30E-05 |
| TMEM145  | 19q13.2       | 0.221474 | 1.25E-05 | 8.33E-05 |
| AKNAD1   | 1p13.3        | -0.22147 | 1.25E-05 | 8.33E-05 |
| DGKQ     | 4p16.3        | 0.221436 | 1.25E-05 | 8.36E-05 |
| DAB2IP   | 9q33.2        | 0.221384 | 1.26E-05 | 8.39E-05 |
| MITF     | 3p13          | -0.22137 | 1.26E-05 | 8.40E-05 |
| KDM2B    | 12q24.31      | 0.221368 | 1.26E-05 | 8.40E-05 |
| RNF103   | 2p11.2        | -0.22134 | 1.26E-05 | 8.42E-05 |
| NCR3     | 6p21.33       | -0.22131 | 1.27E-05 | 8.44E-05 |
| CEP72    | 5p15.33       | 0.221283 | 1.27E-05 | 8.46E-05 |
| TCEAL2   | Xq22.1        | -0.22124 | 1.28E-05 | 8.49E-05 |
| HSD17B14 | 19q13.33      | -0.22123 | 1.28E-05 | 8.50E-05 |
| FCGRT    | 19q13.33      | -0.22119 | 1.28E-05 | 8.53E-05 |

|           |          |          |          |          |
|-----------|----------|----------|----------|----------|
| SNRPF     | 12q23.1  | 0.22118  | 1.28E-05 | 8.53E-05 |
| GPX4      | 19p13.3  | -0.22118 | 1.28E-05 | 8.53E-05 |
| P2RX4     | 12q24.31 | -0.22116 | 1.29E-05 | 8.54E-05 |
| NOP58     | 2q33.1   | 0.221027 | 1.30E-05 | 8.64E-05 |
| RASGRF1   | 15q25.1  | -0.221   | 1.31E-05 | 8.66E-05 |
| FAM210B   | 20q13.2  | -0.22087 | 1.32E-05 | 8.76E-05 |
| ARHGEF1   | 19q13.2  | 0.220868 | 1.32E-05 | 8.76E-05 |
| TMEM97    | 17q11.2  | 0.220843 | 1.32E-05 | 8.78E-05 |
| THSD7A    | 7p21.3   | -0.2208  | 1.33E-05 | 8.81E-05 |
| EBF1      | 5q33.3   | -0.22079 | 1.33E-05 | 8.82E-05 |
| DHCR24    | 1p32.3   | 0.220784 | 1.33E-05 | 8.82E-05 |
| ACTN2     | 1q43     | -0.22075 | 1.34E-05 | 8.84E-05 |
| HAUS3     | 4p16.3   | 0.220712 | 1.34E-05 | 8.87E-05 |
| SMAD7     | 18q21.1  | -0.22067 | 1.35E-05 | 8.90E-05 |
| TNFRSF11B | 8q24.12  | -0.22064 | 1.35E-05 | 8.92E-05 |
| UBA6-AS1  | 4q13.2   | -0.22062 | 1.35E-05 | 8.93E-05 |
| CILP2     | 19p13.11 | -0.22062 | 1.35E-05 | 8.93E-05 |
| PAGR1     | 16p11.2  | 0.220601 | 1.35E-05 | 8.95E-05 |
| DDX31     | 9q34.13  | 0.220563 | 1.36E-05 | 8.97E-05 |
| EMC7      | 15q14    | -0.22054 | 1.36E-05 | 8.99E-05 |
| CACNB4    | 2q23.3   | -0.22052 | 1.36E-05 | 9.00E-05 |
| RAMP3     | 7p13     | -0.22052 | 1.36E-05 | 9.00E-05 |
| CD300C    | 17q25.1  | -0.22051 | 1.37E-05 | 9.01E-05 |
| BMERB1    | 16p13.11 | -0.22047 | 1.37E-05 | 9.04E-05 |
| CSDC2     | 22q13.2  | -0.22046 | 1.37E-05 | 9.05E-05 |
| SLC35F3   | 1q42.2   | -0.22042 | 1.38E-05 | 9.07E-05 |
| FLI1      | 11q24.3  | -0.2204  | 1.38E-05 | 9.09E-05 |
| RAB39B    | Xq28     | -0.22039 | 1.38E-05 | 9.09E-05 |
| MAP1LC3C  | 1q43     | -0.22036 | 1.38E-05 | 9.11E-05 |
| CXCL17    | 19q13.2  | 0.220326 | 1.39E-05 | 9.14E-05 |
| BTAF1     | 10q23.32 | 0.220276 | 1.40E-05 | 9.18E-05 |
| FBXO17    | 19q13.2  | -0.22018 | 1.41E-05 | 9.26E-05 |
| TMEM63B   | 6p21.1   | 0.220141 | 1.41E-05 | 9.29E-05 |
| MYOM1     | 18p11.31 | -0.22012 | 1.41E-05 | 9.30E-05 |
| TACR1     | 2p12     | -0.22009 | 1.42E-05 | 9.33E-05 |
| WDR55     | 5q31.3   | 0.220037 | 1.43E-05 | 9.37E-05 |
| SNRNP25   | 16p13.3  | 0.220036 | 1.43E-05 | 9.37E-05 |
| CROT      | 7q21.12  | -0.22002 | 1.43E-05 | 9.38E-05 |
| ATRNL1    | 10q25.3  | -0.22    | 1.43E-05 | 9.39E-05 |
| STK16     | 2q35     | -0.21997 | 1.44E-05 | 9.42E-05 |
| WRNIP1    | 6p25.2   | 0.219949 | 1.44E-05 | 9.43E-05 |
| TUBB6     | 18p11.21 | -0.21993 | 1.44E-05 | 9.44E-05 |
| GRAMD2B   | 5q23.2   | -0.21988 | 1.45E-05 | 9.48E-05 |
| ADGRG2    | Xp22.13  | -0.21987 | 1.45E-05 | 9.49E-05 |
| SOX13     | 1q32.1   | 0.219854 | 1.45E-05 | 9.50E-05 |
| PIP4P2    | 8q21.3   | -0.21982 | 1.46E-05 | 9.53E-05 |
| CAVIN1    | 17q21.2  | -0.21981 | 1.46E-05 | 9.53E-05 |
| PLXNA4    | 7q32.3   | -0.2198  | 1.46E-05 | 9.54E-05 |
| CAPN8     | 1q41     | 0.219717 | 1.47E-05 | 9.61E-05 |
| PDLIM2    | 8p21.3   | -0.21971 | 1.47E-05 | 9.61E-05 |
| ENPEP     | 4q25     | -0.21967 | 1.48E-05 | 9.64E-05 |
| CTBP2     | 10q26.13 | 0.219651 | 1.48E-05 | 9.65E-05 |
| REEP2     | 5q31.2   | -0.21965 | 1.48E-05 | 9.65E-05 |
| U2SURP    | 3q23     | 0.219608 | 1.48E-05 | 9.69E-05 |
| ITGA4     | 2q31.3   | -0.2196  | 1.48E-05 | 9.69E-05 |
| GATD1     | 11p15.5  | 0.219576 | 1.49E-05 | 9.71E-05 |
| ABI1      | 10p12.1  | -0.21956 | 1.49E-05 | 9.72E-05 |
| TRPC3     | 4q27     | -0.21956 | 1.49E-05 | 9.72E-05 |

|            |          |          |          |          |
|------------|----------|----------|----------|----------|
| RNF187     | 1q42.13  | 0.219538 | 1.49E-05 | 9.73E-05 |
| PAIP2      | 5q31.2   | -0.21937 | 1.52E-05 | 9.88E-05 |
| LRRN1      | 3p26.2   | -0.21937 | 1.52E-05 | 9.88E-05 |
| ARFIP1     | 4q31.3   | -0.21937 | 1.52E-05 | 9.88E-05 |
| ZNF140     | 12q24.33 | -0.21931 | 1.52E-05 | 9.93E-05 |
| FAM13A-AS1 | 4q22.1   | 0.219299 | 1.53E-05 | 9.93E-05 |
| KLRA1P     | 12p13.2  | 0.219261 | 1.53E-05 | 9.97E-05 |
| FAM49A     | 2p24.2   | -0.21925 | 1.53E-05 | 9.97E-05 |
| DBX2       | 12q12    | -0.21923 | 1.54E-05 | 9.99E-05 |
| COL8A1     | 3q12.1   | -0.21917 | 1.54E-05 | 0.0001   |
| VWA5A      | 11q24.2  | -0.21905 | 1.56E-05 | 0.000101 |
| SNURF      | 15q11.2  | -0.21903 | 1.56E-05 | 0.000102 |
| SPP1       | 4q22.1   | -0.21902 | 1.57E-05 | 0.000102 |
| POU3F1     | 1p34.3   | -0.2189  | 1.58E-05 | 0.000103 |
| LONRF3     | Xq24     | 0.218896 | 1.58E-05 | 0.000103 |
| TLR4       | 9q33.1   | -0.21888 | 1.59E-05 | 0.000103 |
| TWF2       | 3p21.2   | -0.21883 | 1.59E-05 | 0.000103 |
| MLXIPL     | 7q11.23  | 0.218819 | 1.59E-05 | 0.000103 |
| COMMD8     | 4p12     | -0.21878 | 1.60E-05 | 0.000104 |
| MYL3       | 3p21.31  | -0.21875 | 1.60E-05 | 0.000104 |
| HAMP       | 19q13.12 | -0.21875 | 1.61E-05 | 0.000104 |
| TMEM184C   | 4q31.23  | -0.21873 | 1.61E-05 | 0.000104 |
| DUS3L      | 19p13.3  | 0.218722 | 1.61E-05 | 0.000104 |
| ADAMTS18   | 16q23.1  | -0.21871 | 1.61E-05 | 0.000104 |
| SYNRG      | 17q12    | -0.2187  | 1.61E-05 | 0.000104 |
| SLC34A3    | 9q34.3   | 0.218677 | 1.62E-05 | 0.000104 |
| CNKSR2     | Xp22.12  | -0.21867 | 1.62E-05 | 0.000104 |
| CCNJL      | 5q33.3   | -0.21867 | 1.62E-05 | 0.000104 |
| GAS1       | 9q21.33  | -0.21866 | 1.62E-05 | 0.000105 |
| ATP8B5P    | 9p13.3   | -0.21853 | 1.64E-05 | 0.000106 |
| MAP6D1     | 3q27.1   | 0.218527 | 1.64E-05 | 0.000106 |
| ENKD1      | 16q22.1  | 0.218486 | 1.64E-05 | 0.000106 |
| LRRIQ3     | 1p31.1   | -0.21845 | 1.65E-05 | 0.000106 |
| GNPDA2     | 4p12     | -0.21838 | 1.66E-05 | 0.000107 |
| B4GALT3    | 1q23.3   | 0.218327 | 1.67E-05 | 0.000108 |
| SNORA18    | 11q21    | 0.218312 | 1.67E-05 | 0.000108 |
| FBXL19-AS1 | 16p11.2  | 0.218288 | 1.67E-05 | 0.000108 |
| HHIPL2     | 1q41     | 0.218282 | 1.67E-05 | 0.000108 |
| FAM227B    | 15q21.2  | -0.21828 | 1.68E-05 | 0.000108 |
| LRFN4      | 11q13.2  | 0.218198 | 1.69E-05 | 0.000109 |
| ALMS1      | 2p13.1   | 0.21817  | 1.69E-05 | 0.000109 |
| NEFL       | 8p21.2   | -0.21816 | 1.69E-05 | 0.000109 |
| HS1BP3     | 2p24.1   | -0.21814 | 1.70E-05 | 0.000109 |
| PARP11     | 12p13.32 | -0.21809 | 1.70E-05 | 0.00011  |
| FAM120AOS  | 9q22.31  | -0.21809 | 1.70E-05 | 0.00011  |
| YIPF4      | 2p22.3   | -0.21807 | 1.71E-05 | 0.00011  |
| SRRD       | 22q12.1  | -0.21802 | 1.72E-05 | 0.00011  |
| CALHM2     | 10q24.33 | -0.218   | 1.72E-05 | 0.00011  |
| COPS8      | 2q37.3   | -0.21794 | 1.73E-05 | 0.000111 |
| WDR97      | 8q24.3   | 0.217937 | 1.73E-05 | 0.000111 |
| LECT2      | 5q31.1   | -0.21793 | 1.73E-05 | 0.000111 |
| CNOT1      | 16q21    | 0.217925 | 1.73E-05 | 0.000111 |
| LRRC23     | 12p13.31 | -0.2179  | 1.73E-05 | 0.000111 |
| ABHD4      | 14q11.2  | -0.2179  | 1.73E-05 | 0.000111 |
| PENK       | 8q12.1   | -0.21788 | 1.74E-05 | 0.000111 |
| ZNF555     | 19p13.3  | -0.21786 | 1.74E-05 | 0.000111 |
| AEBP1      | 7p13     | -0.2178  | 1.75E-05 | 0.000112 |
| NIBAN2     | 9q34.11  | 0.217787 | 1.75E-05 | 0.000112 |

|           |          |          |          |          |
|-----------|----------|----------|----------|----------|
| TBC1D3    | 17q12    | 0.217775 | 1.75E-05 | 0.000112 |
| THOC1     | 18p11.32 | 0.217726 | 1.76E-05 | 0.000113 |
| HLA-DPB2  | 6p21.32  | -0.21772 | 1.76E-05 | 0.000113 |
| FST       | 5q11.2   | -0.21772 | 1.76E-05 | 0.000113 |
| ITGB8     | 7p21.1   | -0.21764 | 1.78E-05 | 0.000113 |
| CRIPAK    | 4p16.3   | 0.217617 | 1.78E-05 | 0.000114 |
| SLX1B     | 16p11.2  | 0.217603 | 1.78E-05 | 0.000114 |
| GIMAP5    | 7q36.1   | -0.21758 | 1.79E-05 | 0.000114 |
| SLC7A5P1  | 16p11.2  | 0.21757  | 1.79E-05 | 0.000114 |
| SLC31A2   | 9q32     | -0.21754 | 1.79E-05 | 0.000114 |
| AP4S1     | 14q12    | -0.21753 | 1.79E-05 | 0.000114 |
| ARMCX6    | Xq22.1   | -0.21749 | 1.80E-05 | 0.000115 |
| NTM       | 11q25    | -0.21744 | 1.81E-05 | 0.000115 |
| CREM      | 10p11.21 | -0.21743 | 1.81E-05 | 0.000115 |
| RANBP3L   | 5p13.2   | -0.21741 | 1.81E-05 | 0.000116 |
| PPP1R12C  | 19q13.42 | 0.217379 | 1.82E-05 | 0.000116 |
| B3GAT2    | 6q13     | 0.217368 | 1.82E-05 | 0.000116 |
| ANKS3     | 16p13.3  | 0.217368 | 1.82E-05 | 0.000116 |
| FMO4      | 1q24.3   | -0.21732 | 1.83E-05 | 0.000116 |
| TCEAL5    | Xq22.1   | -0.21729 | 1.83E-05 | 0.000117 |
| BABAM2    | 2p23.2   | -0.21719 | 1.85E-05 | 0.000118 |
| BCAT2     | 19q13.33 | 0.217183 | 1.85E-05 | 0.000118 |
| RAB3GAP1  | 2q21.3   | -0.21714 | 1.86E-05 | 0.000118 |
| NPTN      | 15q24.1  | -0.21714 | 1.86E-05 | 0.000118 |
| HSCB      | 22q12.1  | -0.21713 | 1.86E-05 | 0.000118 |
| MRVI1     | 11p15.4  | -0.21709 | 1.87E-05 | 0.000118 |
| CCIN      | 9p13.3   | -0.21705 | 1.87E-05 | 0.000119 |
| GABRE     | Xq28     | 0.217015 | 1.88E-05 | 0.000119 |
| FBXO36    | 2q36.3   | -0.21697 | 1.89E-05 | 0.00012  |
| RIN1      | 11q13.2  | 0.216963 | 1.89E-05 | 0.00012  |
| EXOC8     | 1q42.2   | 0.216944 | 1.89E-05 | 0.00012  |
| CATSPER2  | 15q15.3  | 0.216922 | 1.90E-05 | 0.00012  |
| SLC2A9    | 4p16.1   | -0.21689 | 1.90E-05 | 0.00012  |
| ANP32B    | 9q22.33  | 0.216854 | 1.91E-05 | 0.000121 |
| COL25A1   | 4q25     | -0.21684 | 1.91E-05 | 0.000121 |
| CDH13     | 16q23.3  | -0.21683 | 1.91E-05 | 0.000121 |
| CEP350    | 1q25.2   | 0.216781 | 1.92E-05 | 0.000121 |
| APBB3     | 5q31.3   | 0.216754 | 1.92E-05 | 0.000122 |
| INO80E    | 16p11.2  | 0.216713 | 1.93E-05 | 0.000122 |
| ZFP36L1   | 14q24.1  | -0.21667 | 1.94E-05 | 0.000123 |
| EVI5L     | 19p13.2  | 0.216648 | 1.94E-05 | 0.000123 |
| FAM186A   | 12q13.12 | 0.216586 | 1.95E-05 | 0.000123 |
| POLR3E    | 16p12.2  | 0.21657  | 1.96E-05 | 0.000124 |
| PRR14     | 16p11.2  | 0.216569 | 1.96E-05 | 0.000124 |
| SAC3D1    | 11q13.1  | 0.216553 | 1.96E-05 | 0.000124 |
| LINC00265 | 7p14.1   | 0.216527 | 1.96E-05 | 0.000124 |
| SNRPD1    | 18q11.2  | 0.216522 | 1.97E-05 | 0.000124 |
| ESRRG     | 1q41     | -0.21651 | 1.97E-05 | 0.000124 |
| GABBR1    | 6p22.1   | 0.216502 | 1.97E-05 | 0.000124 |
| GPR21     | 9q33.2   | -0.21647 | 1.97E-05 | 0.000124 |
| PYGO2     | 1q21.3   | 0.216418 | 1.98E-05 | 0.000125 |
| RANBP1    | 22q11.21 | 0.216265 | 2.01E-05 | 0.000127 |
| SHBG      | 17p13.1  | -0.21626 | 2.01E-05 | 0.000127 |
| LINC01126 | 2p21     | 0.216245 | 2.02E-05 | 0.000127 |
| FBN1      | 15q21.1  | -0.21619 | 2.03E-05 | 0.000127 |
| GXYLT2    | 3p13     | -0.21619 | 2.03E-05 | 0.000127 |
| VIPAS39   | 14q24.3  | -0.21618 | 2.03E-05 | 0.000127 |
| EFS       | 14q11.2  | -0.21617 | 2.03E-05 | 0.000127 |

|           |                    |          |          |          |
|-----------|--------------------|----------|----------|----------|
| WDR48     | 3p22.2             | -0.21616 | 2.03E-05 | 0.000128 |
| TMEM217   | 6p21.2             | -0.21609 | 2.04E-05 | 0.000128 |
| LINC01001 | 11p15.5            | 0.216073 | 2.05E-05 | 0.000128 |
| EVI5      | 1p22.1             | -0.21607 | 2.05E-05 | 0.000128 |
| SNRPN     | 15q11.2            | -0.21604 | 2.05E-05 | 0.000129 |
| NDP       | Xp11.3             | -0.21598 | 2.06E-05 | 0.000129 |
| RB1CC1    | 8q11.23            | -0.21592 | 2.07E-05 | 0.00013  |
| FNBP1     | 9q34.11            | -0.21586 | 2.09E-05 | 0.000131 |
| S100A16   | 1q21.3             | 0.215843 | 2.09E-05 | 0.000131 |
| ZNF747    | 16p11.2            | -0.21584 | 2.09E-05 | 0.000131 |
| SARAF     | 8p12               | -0.21582 | 2.09E-05 | 0.000131 |
| FLT3LG    | 19q13.33           | -0.2157  | 2.12E-05 | 0.000133 |
| SOX6      | 11p15.2            | -0.2157  | 2.12E-05 | 0.000133 |
| PHLDB2    | 3q13.2             | -0.21568 | 2.12E-05 | 0.000133 |
| SCARNA12  | 12p13.31           | 0.215655 | 2.13E-05 | 0.000133 |
| DYRK1B    | 19q13.2            | -0.21563 | 2.13E-05 | 0.000133 |
| KCNA1     | 12p13.32           | -0.21563 | 2.13E-05 | 0.000133 |
| LINC00092 | 9q22.32            | -0.21561 | 2.13E-05 | 0.000133 |
| FREM2     | 13q13.3            | -0.21561 | 2.14E-05 | 0.000133 |
| FAM160B1  | 10q25.3            | -0.21555 | 2.15E-05 | 0.000134 |
| LAMA4     | 6q21               | -0.21554 | 2.15E-05 | 0.000134 |
| PRXL2B    | 1p36.32            | 0.215473 | 2.16E-05 | 0.000135 |
| KL        | 13q13.1            | -0.21547 | 2.16E-05 | 0.000135 |
| KRBA2     | 17p13.1            | -0.21545 | 2.17E-05 | 0.000135 |
| NDC1      | 1p32.3             | 0.215416 | 2.17E-05 | 0.000135 |
| SMURF2    | 17q23.3-q24.1      | -0.21539 | 2.18E-05 | 0.000136 |
| MXD4      | 4p16.3             | -0.21535 | 2.19E-05 | 0.000136 |
| GRIK4     | 11q23.3            | -0.21522 | 2.21E-05 | 0.000138 |
| ZC3H18    | 16q24.2            | 0.215206 | 2.21E-05 | 0.000138 |
| RGS18     | 1q31.2             | -0.21519 | 2.22E-05 | 0.000138 |
| COPS7B    | 2q37.1             | 0.215183 | 2.22E-05 | 0.000138 |
| MAGEE1    | Xq13.3             | -0.21517 | 2.22E-05 | 0.000138 |
| SCN11A    | 3p22.2             | -0.21516 | 2.22E-05 | 0.000138 |
| TTLL3     | 3p25.3             | 0.215067 | 2.24E-05 | 0.000139 |
| DGKZ      | 11p11.2            | 0.215017 | 2.25E-05 | 0.00014  |
| STYK1     | 12p13.2            | 0.214963 | 2.26E-05 | 0.000141 |
| F12       | 5q35.3             | 0.214943 | 2.27E-05 | 0.000141 |
| GTF2H1    | 11p15.1            | -0.21491 | 2.27E-05 | 0.000141 |
| SDSL      | 12q24.13           | -0.2149  | 2.27E-05 | 0.000141 |
| KCNQ4     | 1p34.2             | 0.214892 | 2.28E-05 | 0.000141 |
| NOS1AP    | 1q23.3             | 0.21486  | 2.28E-05 | 0.000142 |
| AKAP17A   | Xp22.33 and Yp11.2 | 0.214849 | 2.29E-05 | 0.000142 |
| PCSK9     | 1p32.3             | 0.214845 | 2.29E-05 | 0.000142 |
| MYH11     | 16p13.11           | -0.21484 | 2.29E-05 | 0.000142 |
| GRPR      | Xp22.2             | -0.2148  | 2.30E-05 | 0.000142 |
| POU2F1    | 1q24.2             | 0.214755 | 2.31E-05 | 0.000143 |
| URB1-AS1  | 21q22.11           | -0.21472 | 2.31E-05 | 0.000143 |
| COG7      | 16p12.2            | 0.214705 | 2.32E-05 | 0.000143 |
| PLEKHF2   | 8q22.1             | -0.21469 | 2.32E-05 | 0.000144 |
| KLHL5     | 4p14               | -0.21466 | 2.33E-05 | 0.000144 |
| TRIQQ     | 8q22.1             | -0.21464 | 2.33E-05 | 0.000144 |
| DNM1P35   | 15q24.2            | 0.21464  | 2.33E-05 | 0.000144 |
| MYH14     | 19q13.33           | 0.214576 | 2.34E-05 | 0.000145 |
| VAMP2     | 17p13.1            | -0.21448 | 2.36E-05 | 0.000146 |
| DEK       | 6p22.3             | 0.214414 | 2.38E-05 | 0.000147 |
| CTNND2    | 5p15.2             | -0.21439 | 2.38E-05 | 0.000147 |
| C20ORF194 | 20p13              | -0.21438 | 2.38E-05 | 0.000147 |
| COPS4     | 4q21.22            | -0.2143  | 2.40E-05 | 0.000148 |

|           |               |          |          |          |
|-----------|---------------|----------|----------|----------|
| SCAMP1    | 5q14.1        | -0.21426 | 2.41E-05 | 0.000149 |
| CRIP2     | 14q32.33      | -0.21426 | 2.41E-05 | 0.000149 |
| HDAC10    | 22q13.33      | 0.214257 | 2.41E-05 | 0.000149 |
| PPP1R1C   | 2q31.3-q32.1  | -0.21426 | 2.41E-05 | 0.000149 |
| KCTD21    | 11q14.1       | -0.21412 | 2.44E-05 | 0.00015  |
| PCDHA10   | 5q31.3        | -0.21411 | 2.44E-05 | 0.00015  |
| JPT2      | 16p13.3       | 0.214079 | 2.45E-05 | 0.000151 |
| MAPKAPK2  | 1q32.1        | 0.214076 | 2.45E-05 | 0.000151 |
| ST8SIA4   | 5q21.1        | -0.21405 | 2.46E-05 | 0.000151 |
| MRPL4     | 19p13.2       | 0.214041 | 2.46E-05 | 0.000151 |
| ADAM28    | 8p21.2        | -0.21403 | 2.46E-05 | 0.000151 |
| AFAP1     | 4p16.1        | -0.21389 | 2.49E-05 | 0.000153 |
| WHAMMP2   | 15q13.1       | -0.21384 | 2.50E-05 | 0.000154 |
| STK36     | 2q35          | 0.213763 | 2.52E-05 | 0.000155 |
| C1QTNF2   | 5q33.3        | -0.21374 | 2.52E-05 | 0.000155 |
| SMG7      | 1q25.3        | 0.21369  | 2.54E-05 | 0.000156 |
| CHRNA1    | 2q31.1        | -0.2136  | 2.56E-05 | 0.000157 |
| SPDYE2    | 7q22.1        | 0.213546 | 2.57E-05 | 0.000158 |
| CCBE1     | 18q21.32      | -0.21347 | 2.59E-05 | 0.000159 |
| FGF12     | 3q28-q29      | -0.21346 | 2.59E-05 | 0.000159 |
| SLC12A6   | 15q14         | -0.21346 | 2.59E-05 | 0.000159 |
| RRAGB     | Xp11.21       | -0.21333 | 2.62E-05 | 0.000161 |
| ABCA6     | 17q24.2-q24.3 | -0.21331 | 2.62E-05 | 0.000161 |
| TRIP4     | 15q22.31      | -0.2133  | 2.63E-05 | 0.000161 |
| DYNC2LI1  | 2p21          | -0.21325 | 2.64E-05 | 0.000162 |
| PTTG1IP   | 21q22.3       | -0.21325 | 2.64E-05 | 0.000162 |
| METTL17   | 14q11.2       | 0.213237 | 2.64E-05 | 0.000162 |
| GORASP2   | 2q31.1        | -0.2132  | 2.65E-05 | 0.000162 |
| PSMD4     | 1q21.3        | 0.213174 | 2.66E-05 | 0.000162 |
| PCDHA6    | 5q31.3        | -0.21316 | 2.66E-05 | 0.000163 |
| LINC01018 | 5p15.31       | -0.21315 | 2.66E-05 | 0.000163 |
| CH25H     | 10q23.31      | -0.21313 | 2.67E-05 | 0.000163 |
| BIN3-IT1  | 8p21.3        | 0.213112 | 2.67E-05 | 0.000163 |
| DHX15     | 4p15.2        | 0.213094 | 2.67E-05 | 0.000163 |
| SRPX2     | Xq22.1        | -0.21307 | 2.68E-05 | 0.000164 |
| TSSK4     | 14q12         | 0.213012 | 2.69E-05 | 0.000164 |
| PODNL1    | 19p13.12      | -0.21299 | 2.70E-05 | 0.000165 |
| RASSF2    | 20p13         | -0.21299 | 2.70E-05 | 0.000165 |
| GRP       | 18q21.32      | -0.21297 | 2.70E-05 | 0.000165 |
| TKT       | 3p21.1        | 0.212952 | 2.71E-05 | 0.000165 |
| ODR4      | 1q31.1        | 0.212931 | 2.71E-05 | 0.000165 |
| PLA2R1    | 2q24.2        | -0.21293 | 2.71E-05 | 0.000165 |
| FADS3     | 11q12.2       | -0.21281 | 2.74E-05 | 0.000167 |
| SGK3      | 8q13.1        | -0.21277 | 2.75E-05 | 0.000168 |
| ROBO1     | 3p12.3        | -0.21276 | 2.76E-05 | 0.000168 |
| DNAH1     | 3p21.1        | 0.212726 | 2.76E-05 | 0.000168 |
| CCKBR     | 11p15.4       | -0.21264 | 2.79E-05 | 0.000169 |
| RFLNB     | 17p13.3       | -0.21262 | 2.79E-05 | 0.00017  |
| GRID1     | 10q23.1-q23.2 | -0.21262 | 2.79E-05 | 0.00017  |
| LSM4      | 19p13.11      | 0.212559 | 2.80E-05 | 0.00017  |
| ASB5      | 4q34.2        | -0.21255 | 2.81E-05 | 0.00017  |
| TRPC1     | 3q23          | -0.21253 | 2.81E-05 | 0.000171 |
| NCL       | 2q37.1        | 0.212529 | 2.81E-05 | 0.000171 |
| SNORA21   | 17q12         | 0.212474 | 2.83E-05 | 0.000172 |
| MXRA5     | Xp22.33       | -0.21247 | 2.83E-05 | 0.000172 |
| TPM2      | 9p13.3        | -0.21247 | 2.83E-05 | 0.000172 |
| PAICS     | 4q12          | 0.212459 | 2.83E-05 | 0.000172 |
| RPRM      | 2q23.3        | -0.21236 | 2.86E-05 | 0.000173 |



|          |               |          |          |          |
|----------|---------------|----------|----------|----------|
| COPB1    | 11p15.2       | -0.21228 | 2.88E-05 | 0.000174 |
| MAPK8IP1 | 11p11.2       | -0.21224 | 2.88E-05 | 0.000175 |
| DERL2    | 17p13.2       | -0.21224 | 2.89E-05 | 0.000175 |
| RNF168   | 3q29          | 0.212236 | 2.89E-05 | 0.000175 |
| ST3GAL5  | 2p11.2        | -0.21218 | 2.90E-05 | 0.000176 |
| B3GALT4  | 6p21.32       | -0.21217 | 2.90E-05 | 0.000176 |
| TGM2     | 20q11.23      | -0.21215 | 2.91E-05 | 0.000176 |
| STUM     | 1q42.12       | -0.2121  | 2.92E-05 | 0.000177 |
| CLMP     | 11q24.1       | -0.2121  | 2.92E-05 | 0.000177 |
| SPICE1   | 3q13.2        | 0.21209  | 2.92E-05 | 0.000177 |
| RBM4     | 11q13.2       | -0.21208 | 2.93E-05 | 0.000177 |
| FILIP1   | 6q14.1        | -0.21204 | 2.94E-05 | 0.000177 |
| CNPY4    | 7q22.1        | -0.21203 | 2.94E-05 | 0.000177 |
| UBE2G2   | 21q22.3       | 0.212025 | 2.94E-05 | 0.000178 |
| HLA-DRA  | 6p21.32       | -0.21202 | 2.94E-05 | 0.000178 |
| DUSP3    | 17q21.31      | -0.212   | 2.95E-05 | 0.000178 |
| FAM53B   | 10q26.13      | 0.211983 | 2.95E-05 | 0.000178 |
| OPA3     | 19q13.32      | 0.211932 | 2.97E-05 | 0.000179 |
| SPDY8P   | 7q11.23       | 0.21193  | 2.97E-05 | 0.000179 |
| ACD      | 16q22.1       | 0.211883 | 2.98E-05 | 0.000179 |
| HGS      | 17q25.3       | 0.211862 | 2.98E-05 | 0.00018  |
| RNPS1    | 16p13.3       | 0.211857 | 2.98E-05 | 0.00018  |
| BICDL1   | 12q24.23      | 0.211789 | 3.00E-05 | 0.000181 |
| USP11    | Xp11.3        | -0.21178 | 3.00E-05 | 0.000181 |
| CPEB1    | 15q25.2       | -0.21176 | 3.01E-05 | 0.000181 |
| GNB3     | 12p13.31      | 0.211757 | 3.01E-05 | 0.000181 |
| GPR176   | 15q14-q15.1   | -0.21173 | 3.02E-05 | 0.000181 |
| PTPRM    | 18p11.23      | -0.21173 | 3.02E-05 | 0.000182 |
| AMN1     | 12p11.21      | -0.21172 | 3.02E-05 | 0.000182 |
| RABGEF1  | 7q11.21       | -0.21168 | 3.03E-05 | 0.000182 |
| RAB6A    | 11q13.4       | -0.21166 | 3.04E-05 | 0.000183 |
| MAPK4    | 18q21.1-q21.2 | -0.21163 | 3.04E-05 | 0.000183 |
| PEBP4    | 8p21.3        | -0.21154 | 3.07E-05 | 0.000184 |
| CSDE1    | 1p13.2        | -0.21152 | 3.08E-05 | 0.000185 |
| ARHGAP23 | 17q12         | -0.21149 | 3.08E-05 | 0.000185 |
| TLK1     | 2q31.1        | -0.21144 | 3.10E-05 | 0.000186 |
| MCM9     | 6q22.31       | 0.211409 | 3.11E-05 | 0.000186 |
| SND1-IT1 | 7q32.1        | 0.211374 | 3.12E-05 | 0.000187 |
| GATAD2B  | 1q21.3        | 0.211351 | 3.12E-05 | 0.000187 |
| RAB2B    | 14q11.2       | -0.21135 | 3.12E-05 | 0.000187 |
| PCTP     | 17q22         | -0.21134 | 3.12E-05 | 0.000187 |
| IST1     | 16q22.2       | -0.21134 | 3.12E-05 | 0.000187 |
| EPYC     | 12q21.33      | -0.21126 | 3.15E-05 | 0.000188 |
| CLEC1A   | 12p13.2       | -0.21125 | 3.15E-05 | 0.000188 |
| CBX6     | 22q13.1       | -0.21119 | 3.17E-05 | 0.000189 |
| MBOAT7   | 19q13.42      | 0.211167 | 3.17E-05 | 0.00019  |
| ACKR1    | 1q23.2        | -0.21117 | 3.17E-05 | 0.00019  |
| WNT6     | 2q35          | -0.21116 | 3.18E-05 | 0.00019  |
| KPNA5    | 6q22.1        | -0.21115 | 3.18E-05 | 0.00019  |
| UBE2Q2   | 15q24.2       | -0.21115 | 3.18E-05 | 0.00019  |
| GJA4     | 1p34.3        | -0.21113 | 3.18E-05 | 0.00019  |
| PPM1A    | 14q23.1       | -0.21112 | 3.19E-05 | 0.00019  |
| MAB21L4  | 2q37.3        | -0.2111  | 3.19E-05 | 0.000191 |
| CCR2     | 3p21.31       | -0.21108 | 3.20E-05 | 0.000191 |
| ADA2     | 22q11.1       | -0.21105 | 3.21E-05 | 0.000191 |
| HTT      | 4p16.3        | 0.211047 | 3.21E-05 | 0.000191 |
| DYNLT3   | Xp11.4        | -0.21097 | 3.23E-05 | 0.000192 |
| AKR1B1   | 7q33          | -0.2109  | 3.25E-05 | 0.000193 |

|           |          |          |          |          |
|-----------|----------|----------|----------|----------|
| IGSF21    | 1p36.13  | -0.21085 | 3.26E-05 | 0.000194 |
| ZDHHHC12  | 9q34.11  | 0.210767 | 3.29E-05 | 0.000196 |
| GNMB      | 7p15.3   | -0.2107  | 3.31E-05 | 0.000197 |
| PHLDB1    | 11q23.3  | -0.2107  | 3.31E-05 | 0.000197 |
| TSPAN18   | 11p11.2  | -0.21067 | 3.31E-05 | 0.000197 |
| SLC24A1   | 15q22.31 | -0.21067 | 3.31E-05 | 0.000197 |
| ST3GAL6   | 3q12.1   | -0.21067 | 3.32E-05 | 0.000197 |
| WEE2-AS1  | 7q34     | -0.21061 | 3.33E-05 | 0.000198 |
| TRIM13    | 13q14.2  | -0.21054 | 3.35E-05 | 0.000199 |
| SNRPA1    | 15q26.3  | 0.210453 | 3.38E-05 | 0.000201 |
| MAN1A1    | 6q22.31  | -0.21044 | 3.38E-05 | 0.000201 |
| MLC1      | 22q13.33 | -0.21043 | 3.39E-05 | 0.000201 |
| INA       | 10q24.33 | -0.21041 | 3.39E-05 | 0.000201 |
| PRPF4B    | 6p25.2   | 0.21041  | 3.39E-05 | 0.000201 |
| PLXNB1    | 3p21.31  | 0.210409 | 3.39E-05 | 0.000201 |
| ZC3HAV1L  | 7q34     | 0.210398 | 3.40E-05 | 0.000201 |
| SLC22A4   | 5q31.1   | -0.21038 | 3.40E-05 | 0.000202 |
| ZNF814    | 19q13.43 | 0.210335 | 3.41E-05 | 0.000202 |
| MOB1B     | 4q13.3   | -0.21028 | 3.43E-05 | 0.000203 |
| SORCS2    | 4p16.1   | -0.21026 | 3.44E-05 | 0.000204 |
| C11ORF54  | 11q21    | -0.21015 | 3.47E-05 | 0.000206 |
| MYL6      | 12q13.2  | -0.21011 | 3.48E-05 | 0.000206 |
| INTS6L    | Xq26.3   | 0.210099 | 3.49E-05 | 0.000206 |
| DPYD      | 1p21.3   | -0.20997 | 3.52E-05 | 0.000209 |
| MED26     | 19p13.11 | 0.209962 | 3.53E-05 | 0.000209 |
| TWIST2    | 2q37.3   | -0.20994 | 3.54E-05 | 0.000209 |
| GSPT1     | 16p13.13 | 0.209905 | 3.55E-05 | 0.00021  |
| NRXN1     | 2p16.3   | -0.20989 | 3.55E-05 | 0.00021  |
| PRRX1     | 1q24.2   | -0.20987 | 3.56E-05 | 0.00021  |
| SARS2     | 19q13.2  | 0.20985  | 3.56E-05 | 0.00021  |
| ARIH2     | 3p21.31  | 0.209789 | 3.58E-05 | 0.000211 |
| CRISPLD2  | 16q24.1  | -0.20976 | 3.59E-05 | 0.000212 |
| GNAI1     | 7q21.11  | -0.20974 | 3.60E-05 | 0.000212 |
| SLC38A4   | 12q13.11 | -0.20974 | 3.60E-05 | 0.000212 |
| LRIT3     | 4q25     | 0.209695 | 3.61E-05 | 0.000213 |
| VEGFA     | 6p21.1   | 0.209684 | 3.61E-05 | 0.000213 |
| TAP2      | 6p21.32  | 0.209627 | 3.63E-05 | 0.000214 |
| SEMA7A    | 15q24.1  | -0.20961 | 3.64E-05 | 0.000214 |
| MMP16     | 8q21.3   | -0.20959 | 3.64E-05 | 0.000215 |
| SF1       | 11q13.1  | 0.209579 | 3.65E-05 | 0.000215 |
| NUP93     | 16q13    | 0.209559 | 3.65E-05 | 0.000215 |
| PDCD4-AS1 | 10q25.2  | -0.20955 | 3.66E-05 | 0.000215 |
| RPL23AP64 | 11q23.3  | 0.209538 | 3.66E-05 | 0.000215 |
| ERGIC3    | 20q11.22 | -0.20952 | 3.67E-05 | 0.000216 |
| GDF6      | 8q22.1   | -0.2095  | 3.67E-05 | 0.000216 |
| ARL9      | 4q12     | -0.2095  | 3.67E-05 | 0.000216 |
| POU6F1    | 12q13.13 | -0.20948 | 3.68E-05 | 0.000216 |
| ANKK1     | 11q23.2  | -0.20943 | 3.70E-05 | 0.000217 |
| AK5       | 1p31.1   | -0.20942 | 3.70E-05 | 0.000217 |
| HCG4      | 6p22.1   | -0.20939 | 3.71E-05 | 0.000218 |
| SRGN      | 10q22.1  | -0.20939 | 3.71E-05 | 0.000218 |
| TMEM9B    | 11p15.4  | -0.20938 | 3.71E-05 | 0.000218 |
| SCLY      | 2q37.3   | 0.209371 | 3.72E-05 | 0.000218 |
| SYNCRIP   | 6q14.3   | 0.2093   | 3.74E-05 | 0.000219 |
| ANKHD1    | 5q31.3   | 0.209292 | 3.74E-05 | 0.000219 |
| SUGT1P1   | 9p13.3   | -0.20929 | 3.74E-05 | 0.000219 |
| RPL36A    | Xq22.1   | 0.209291 | 3.74E-05 | 0.000219 |
| CERK      | 22q13.31 | -0.20928 | 3.74E-05 | 0.000219 |

|           |          |          |          |          |
|-----------|----------|----------|----------|----------|
| PDE6B     | 4p16.3   | -0.20921 | 3.77E-05 | 0.000221 |
| CPN1      | 10q24.2  | -0.20916 | 3.79E-05 | 0.000222 |
| SLC37A1   | 21q22.3  | 0.209152 | 3.79E-05 | 0.000222 |
| DNAAF5    | 7p22.3   | 0.209132 | 3.79E-05 | 0.000222 |
| REEP4     | 8p21.3   | 0.209062 | 3.82E-05 | 0.000223 |
| PGM2L1    | 11q13.4  | -0.20904 | 3.83E-05 | 0.000224 |
| PCP4      | 21q22.2  | -0.20901 | 3.84E-05 | 0.000224 |
| BCHE      | 3q26.1   | -0.20899 | 3.84E-05 | 0.000224 |
| KRT40     | 17q21.2  | -0.20898 | 3.84E-05 | 0.000225 |
| SRP14     | 15q15.1  | -0.20897 | 3.85E-05 | 0.000225 |
| SUPT16H   | 14q11.2  | 0.208931 | 3.86E-05 | 0.000225 |
| TRPM6     | 9q21.13  | -0.20893 | 3.86E-05 | 0.000225 |
| SPTAN1    | 9q34.11  | 0.208831 | 3.89E-05 | 0.000227 |
| DNAJB6    | 7q36.3   | -0.2088  | 3.90E-05 | 0.000228 |
| ELL2      | 5q15     | -0.20875 | 3.92E-05 | 0.000229 |
| NIPSNAP2  | 7p11.2   | -0.20874 | 3.93E-05 | 0.000229 |
| FAM160A2  | 11p15.4  | 0.208722 | 3.93E-05 | 0.000229 |
| HLA-DQA1  | 6p21.32  | -0.20863 | 3.96E-05 | 0.000231 |
| ASB14     | 3p14.3   | 0.208627 | 3.96E-05 | 0.000231 |
| DPY19L4   | 8q22.1   | -0.20858 | 3.98E-05 | 0.000232 |
| CHPT1     | 12q23.2  | -0.20849 | 4.01E-05 | 0.000234 |
| ETFBKMT   | 12p11.21 | -0.20835 | 4.06E-05 | 0.000236 |
| TENM1     | Xq25     | -0.20832 | 4.07E-05 | 0.000237 |
| SH2D3A    | 19p13.3  | 0.208307 | 4.08E-05 | 0.000237 |
| SNX2      | 5q23.2   | -0.20829 | 4.08E-05 | 0.000237 |
| PTCHD4    | 6p12.3   | -0.20828 | 4.08E-05 | 0.000237 |
| MPV17     | 2p23.3   | -0.20828 | 4.09E-05 | 0.000237 |
| ISCA1     | 9q21.33  | -0.20828 | 4.09E-05 | 0.000237 |
| DDX43     | 6q13     | -0.20827 | 4.09E-05 | 0.000238 |
| GRAP      | 17p11.2  | -0.20823 | 4.10E-05 | 0.000238 |
| SERPINA5  | 14q32.13 | -0.20823 | 4.11E-05 | 0.000238 |
| PDCD4     | 10q25.2  | -0.20821 | 4.11E-05 | 0.000239 |
| FPGS      | 9q34.11  | 0.208193 | 4.12E-05 | 0.000239 |
| DCSTAMP   | 8q22.3   | -0.20818 | 4.12E-05 | 0.000239 |
| MICAL1    | 6q21     | 0.20817  | 4.13E-05 | 0.000239 |
| BZW1      | 2q33.1   | -0.20816 | 4.13E-05 | 0.000239 |
| P2RX7     | 12q24.31 | -0.20815 | 4.13E-05 | 0.000239 |
| SLFN11    | 17q12    | -0.20814 | 4.14E-05 | 0.00024  |
| SVBP      | 1p34.2   | -0.20809 | 4.15E-05 | 0.000241 |
| MYO5A     | 15q21.2  | -0.20809 | 4.16E-05 | 0.000241 |
| PIH1D1    | 19q13.33 | 0.208081 | 4.16E-05 | 0.000241 |
| ECSCR     | 5q31.2   | -0.20798 | 4.19E-05 | 0.000243 |
| SAMD4B    | 19q13.2  | 0.207972 | 4.20E-05 | 0.000243 |
| COMMD9    | 11p13    | -0.20796 | 4.20E-05 | 0.000243 |
| RPL23AP32 | 2p16.2   | -0.20793 | 4.21E-05 | 0.000244 |
| C4A       | 6p21.33  | -0.20789 | 4.23E-05 | 0.000244 |
| AQP2      | 12q13.12 | 0.207891 | 4.23E-05 | 0.000244 |
| TCEAL6    | Xq22.1   | -0.20786 | 4.24E-05 | 0.000245 |
| ARHGEF6   | Xq26.3   | -0.20786 | 4.24E-05 | 0.000245 |
| NAA30     | 14q22.3  | -0.20784 | 4.25E-05 | 0.000245 |
| BCAT1     | 12p12.1  | -0.2078  | 4.26E-05 | 0.000246 |
| TRMT2A    | 22q11.21 | 0.207795 | 4.26E-05 | 0.000246 |
| TET3      | 2p13.1   | 0.207791 | 4.26E-05 | 0.000246 |
| ANKS1B    | 12q23.1  | -0.20777 | 4.27E-05 | 0.000246 |
| JHY       | 11q24.1  | -0.20776 | 4.28E-05 | 0.000247 |
| SERPINA4  | 14q32.13 | -0.20775 | 4.28E-05 | 0.000247 |
| HIST1H2AG | 6p22.1   | 0.207728 | 4.29E-05 | 0.000247 |
| WWP2      | 16q22.1  | 0.207727 | 4.29E-05 | 0.000247 |

|          |          |          |          |          |
|----------|----------|----------|----------|----------|
| PHYH     | 10p13    | -0.20762 | 4.33E-05 | 0.000249 |
| NTAN1    | 16p13.11 | -0.20761 | 4.33E-05 | 0.000249 |
| MARS     | 12q13.3  | 0.207594 | 4.34E-05 | 0.00025  |
| MRGPRF   | 11q13.3  | -0.20756 | 4.35E-05 | 0.00025  |
| CD48     | 1q23.3   | -0.20754 | 4.36E-05 | 0.000251 |
| RNF182   | 6p23     | -0.20748 | 4.38E-05 | 0.000252 |
| UBE2E3   | 2q31.3   | -0.20747 | 4.38E-05 | 0.000252 |
| ANOS1    | Xp22.31  | -0.20747 | 4.38E-05 | 0.000252 |
| ELF5     | 11p13    | -0.2074  | 4.41E-05 | 0.000254 |
| PAK3     | Xq23     | -0.20738 | 4.42E-05 | 0.000254 |
| RAD52    | 12p13.33 | 0.20734  | 4.43E-05 | 0.000255 |
| LDB3     | 10q23.2  | -0.20734 | 4.44E-05 | 0.000255 |
| MYL5     | 4p16.3   | 0.207326 | 4.44E-05 | 0.000255 |
| RTN4RL1  | 17p13.3  | -0.20732 | 4.44E-05 | 0.000255 |
| IKBKE    | 1q32.1   | 0.207308 | 4.45E-05 | 0.000255 |
| APOC1    | 19q13.32 | -0.2072  | 4.49E-05 | 0.000257 |
| PPP1R16A | 8q24.3   | 0.207161 | 4.50E-05 | 0.000258 |
| C1QTNF3  | 5p13.2   | -0.20713 | 4.52E-05 | 0.000259 |
| MSH6     | 2p16.3   | 0.207065 | 4.54E-05 | 0.00026  |
| VPS9D1   | 16q24.3  | 0.207048 | 4.55E-05 | 0.00026  |
| GIMAP2   | 7q36.1   | -0.20702 | 4.56E-05 | 0.000261 |
| SPINK1   | 5q32     | -0.20698 | 4.57E-05 | 0.000262 |
| SLC38A6  | 14q23.1  | -0.20696 | 4.58E-05 | 0.000262 |
| TTLL12   | 22q13.2  | 0.20695  | 4.59E-05 | 0.000262 |
| NPAS3    | 14q13.1  | -0.20686 | 4.62E-05 | 0.000264 |
| MEIS1    | 2p14     | -0.20685 | 4.63E-05 | 0.000264 |
| CAPN10   | 2q37.3   | 0.206846 | 4.63E-05 | 0.000264 |
| PBX1     | 1q23.3   | -0.20685 | 4.63E-05 | 0.000264 |
| SFXN2    | 10q24.32 | 0.206839 | 4.63E-05 | 0.000265 |
| ZBED4    | 22q13.33 | 0.206809 | 4.64E-05 | 0.000265 |
| SORBS2   | 4q35.1   | -0.20678 | 4.66E-05 | 0.000266 |
| PLPP4    | 10q26.12 | -0.20674 | 4.67E-05 | 0.000267 |
| SLC29A3  | 10q22.1  | -0.20674 | 4.67E-05 | 0.000267 |
| SNX33    | 15q24.2  | -0.20671 | 4.68E-05 | 0.000267 |
| CTR9     | 11p15.4  | -0.20667 | 4.70E-05 | 0.000268 |
| HAUS6    | 9p22.1   | 0.206658 | 4.70E-05 | 0.000268 |
| NEU1     | 6p21.33  | -0.20665 | 4.71E-05 | 0.000268 |
| SPCS2    | 11q13.4  | -0.20664 | 4.71E-05 | 0.000268 |
| SGTA     | 19p13.3  | 0.206633 | 4.71E-05 | 0.000269 |
| CTSZ     | 20q13.32 | -0.20651 | 4.76E-05 | 0.000271 |
| BDP1     | 5q13.2   | 0.206504 | 4.77E-05 | 0.000271 |
| MAST3    | 19p13.11 | 0.206484 | 4.78E-05 | 0.000272 |
| SPTB     | 14q23.3  | 0.206478 | 4.78E-05 | 0.000272 |
| EBF3     | 10q26.3  | -0.20646 | 4.78E-05 | 0.000272 |
| RHOJ     | 14q23.2  | -0.20645 | 4.79E-05 | 0.000272 |
| SLF2     | 10q24.31 | 0.206439 | 4.79E-05 | 0.000273 |
| TAB2     | 6q25.1   | -0.20642 | 4.80E-05 | 0.000273 |
| HGF      | 7q21.11  | -0.20642 | 4.80E-05 | 0.000273 |
| CNGA1    | 4p12     | -0.20642 | 4.80E-05 | 0.000273 |
| UBE2M    | 19q13.43 | 0.206418 | 4.80E-05 | 0.000273 |
| CUEDC1   | 17q22    | -0.20639 | 4.81E-05 | 0.000273 |
| EXTL1    | 1p36.11  | -0.20639 | 4.81E-05 | 0.000273 |
| FHL5     | 6q16.1   | -0.20638 | 4.82E-05 | 0.000273 |
| CUBN     | 10p13    | -0.20636 | 4.83E-05 | 0.000274 |
| ADRA2A   | 10q25.2  | -0.20631 | 4.85E-05 | 0.000275 |
| NME5     | 5q31.2   | -0.2063  | 4.85E-05 | 0.000275 |
| GTPBP2   | 6p21.1   | 0.206294 | 4.85E-05 | 0.000275 |
| POLI     | 18q21.2  | -0.20628 | 4.86E-05 | 0.000275 |

|           |          |          |          |          |
|-----------|----------|----------|----------|----------|
| IGF2      | 11p15.5  | -0.20622 | 4.88E-05 | 0.000277 |
| GPR146    | 7p22.3   | -0.20621 | 4.89E-05 | 0.000277 |
| HIST1H2AM | 6p22.1   | 0.206177 | 4.90E-05 | 0.000278 |
| RPS3A     | 4q31.3   | -0.20617 | 4.91E-05 | 0.000278 |
| GNGT2     | 17q21.32 | -0.20614 | 4.92E-05 | 0.000278 |
| CAD       | 2p23.3   | 0.206137 | 4.92E-05 | 0.000278 |
| CDS2      | 20p12.3  | -0.20612 | 4.93E-05 | 0.000279 |
| RGS1      | 1q31.2   | -0.20606 | 4.95E-05 | 0.00028  |
| CCDC3     | 10p13    | -0.20604 | 4.96E-05 | 0.00028  |
| LYRM9     | 17q11.2  | -0.20602 | 4.97E-05 | 0.000281 |
| KCTD10    | 12q24.11 | -0.20601 | 4.97E-05 | 0.000281 |
| HIST1H4I  | 6p22.1   | 0.206004 | 4.98E-05 | 0.000281 |
| GPX3      | 5q33.1   | -0.206   | 4.98E-05 | 0.000281 |
| PRPH2     | 6p21.1   | -0.20599 | 4.98E-05 | 0.000281 |
| TMEM135   | 11q14.2  | -0.20598 | 4.99E-05 | 0.000281 |
| STX1B     | 16p11.2  | 0.205947 | 5.00E-05 | 0.000282 |
| SF3B3     | 16q22.1  | 0.205934 | 5.01E-05 | 0.000282 |
| MEIS3     | 19q13.32 | -0.20589 | 5.03E-05 | 0.000283 |
| MIGA1     | 1p31.1   | -0.20587 | 5.03E-05 | 0.000284 |
| SLC6A8    | Xq28     | 0.205858 | 5.04E-05 | 0.000284 |
| AMFR      | 16q13    | -0.20582 | 5.06E-05 | 0.000285 |
| PCDHGC3   | 5q31.3   | -0.20581 | 5.06E-05 | 0.000285 |
| GALNT16   | 14q24.1  | -0.20579 | 5.07E-05 | 0.000285 |
| UST       | 6q25.1   | -0.20569 | 5.11E-05 | 0.000288 |
| RNASE2    | 14q11.2  | -0.20569 | 5.11E-05 | 0.000288 |
| NUP133    | 1q42.13  | 0.205691 | 5.11E-05 | 0.000288 |
| BLOC1S3   | 19q13.32 | 0.205669 | 5.12E-05 | 0.000288 |
| STX7      | 6q23.2   | -0.20563 | 5.14E-05 | 0.000289 |
| DDX41     | 5q35.3   | 0.205629 | 5.14E-05 | 0.000289 |
| NUDT4     | 12q22    | -0.20558 | 5.16E-05 | 0.00029  |
| LPAR1     | 9q31.3   | -0.20557 | 5.16E-05 | 0.00029  |
| PPIC      | 5q23.2   | -0.20553 | 5.18E-05 | 0.000291 |
| ATP8B2    | 1q21.3   | -0.20552 | 5.19E-05 | 0.000291 |
| MAP2K5    | 15q23    | -0.20547 | 5.21E-05 | 0.000292 |
| MAP1B     | 5q13.2   | -0.20544 | 5.23E-05 | 0.000293 |
| HIST3H2BB | 1q42.13  | 0.205438 | 5.23E-05 | 0.000293 |
| DMRTC1B   | Xq13.1   | -0.20542 | 5.23E-05 | 0.000293 |
| YAF2      | 12q12    | -0.20539 | 5.25E-05 | 0.000294 |
| OLR1      | 12p13.2  | -0.20535 | 5.26E-05 | 0.000295 |
| TBRG4     | 7p13     | 0.205258 | 5.31E-05 | 0.000297 |
| GINS1     | 20p11.21 | 0.20525  | 5.31E-05 | 0.000297 |
| NME7      | 1q24.2   | -0.20524 | 5.31E-05 | 0.000298 |
| OR10Q1    | 11q12.1  | 0.205239 | 5.32E-05 | 0.000298 |
| PRKRA     | 2q31.2   | -0.20523 | 5.32E-05 | 0.000298 |
| ANXA5     | 4q27     | -0.20522 | 5.32E-05 | 0.000298 |
| SCT       | 11p15.5  | -0.20519 | 5.34E-05 | 0.000299 |
| ZSWIM7    | 17p12    | -0.20518 | 5.34E-05 | 0.000299 |
| TGFB1I1   | 16p11.2  | -0.20518 | 5.34E-05 | 0.000299 |
| ENPP5     | 6p21.1   | -0.20516 | 5.35E-05 | 0.000299 |
| LRRC49    | 15q23    | -0.20515 | 5.35E-05 | 0.000299 |
| TGFA      | 2p13.3   | -0.20515 | 5.36E-05 | 0.000299 |
| L3MBTL3   | 6q23.1   | -0.20513 | 5.36E-05 | 0.000299 |
| MDGA2     | 14q21.3  | -0.20512 | 5.37E-05 | 0.0003   |
| RHBDF1    | 16p13.3  | 0.205045 | 5.40E-05 | 0.000302 |
| P3H1      | 1p34.2   | -0.20503 | 5.41E-05 | 0.000302 |
| FGD5      | 3p25.1   | -0.20493 | 5.46E-05 | 0.000304 |
| MFSD14B   | 9q22.32  | 0.204873 | 5.48E-05 | 0.000306 |
| KCNAB3    | 17p13.1  | 0.204833 | 5.50E-05 | 0.000307 |

|             |              |          |          |          |
|-------------|--------------|----------|----------|----------|
| DECR1       | 8q21.3       | -0.20483 | 5.51E-05 | 0.000307 |
| KCNIP1      | 5q35.1       | -0.20481 | 5.52E-05 | 0.000307 |
| NEK1        | 4q33         | -0.20475 | 5.54E-05 | 0.000309 |
| SPAG7       | 17p13.2      | -0.20474 | 5.55E-05 | 0.000309 |
| APLF        | 2p13.3       | -0.20473 | 5.55E-05 | 0.000309 |
| GBP2        | 1p22.2       | -0.20472 | 5.56E-05 | 0.000309 |
| SNX16       | 8q21.13      | -0.20471 | 5.56E-05 | 0.000309 |
| SNAP25      | 20p12.2      | -0.20471 | 5.56E-05 | 0.000309 |
| PRPF19      | 11q12.2      | 0.2047   | 5.57E-05 | 0.000309 |
| HNRNPR      | 1p36.12      | 0.204684 | 5.57E-05 | 0.00031  |
| LOC541473   | 7q11.23      | 0.204668 | 5.58E-05 | 0.00031  |
| RNF207      | 1p36.31      | 0.204668 | 5.58E-05 | 0.00031  |
| TRIM45      | 1p13.1       | 0.204645 | 5.59E-05 | 0.000311 |
| GM2A        | 5q33.1       | -0.20463 | 5.60E-05 | 0.000311 |
| ZFP1        | 16q23.1      | -0.20461 | 5.61E-05 | 0.000311 |
| FBXW2       | 9q33.2       | 0.204598 | 5.62E-05 | 0.000312 |
| CENPP       | 9q22.31      | 0.204566 | 5.63E-05 | 0.000312 |
| ASB8        | 12q13.11     | -0.20454 | 5.64E-05 | 0.000313 |
| BMI1        | 10p12.2      | -0.20449 | 5.67E-05 | 0.000314 |
| ZNF587      | 19q13.43     | 0.20447  | 5.68E-05 | 0.000315 |
| RANBP17     | 5q35.1       | 0.204464 | 5.68E-05 | 0.000315 |
| SGSM3       | 22q13.1      | 0.204408 | 5.71E-05 | 0.000316 |
| SHE         | 1q21.3       | -0.2044  | 5.71E-05 | 0.000316 |
| FZD5        | 2q33.3       | 0.204372 | 5.72E-05 | 0.000317 |
| LACTB       | 15q22.2      | -0.20433 | 5.74E-05 | 0.000318 |
| RRP1B       | 21q22.3      | 0.204295 | 5.76E-05 | 0.000319 |
| FTL         | 19q13.33     | -0.20428 | 5.77E-05 | 0.000319 |
| CYFIP2      | 5q33.3       | -0.20426 | 5.78E-05 | 0.00032  |
| LINC01096   | 4p15.33      | -0.20424 | 5.79E-05 | 0.00032  |
| DMBX1       | 1p33         | 0.204236 | 5.79E-05 | 0.00032  |
| ATP6V0D2    | 8q21.3       | -0.20422 | 5.80E-05 | 0.000321 |
| UXS1        | 2q12.2       | -0.2042  | 5.81E-05 | 0.000321 |
| DAZAP2      | 12q13.13     | -0.2042  | 5.81E-05 | 0.000321 |
| NUDT8       | 11q13.2      | 0.204172 | 5.82E-05 | 0.000322 |
| LIX1L       | 1q21.1       | -0.20415 | 5.83E-05 | 0.000322 |
| MRPL2       | 6p21.1       | 0.204136 | 5.84E-05 | 0.000322 |
| CCDC102A    | 16q21        | -0.20412 | 5.85E-05 | 0.000323 |
| CTTN        | 11q13.3      | 0.204076 | 5.87E-05 | 0.000324 |
| SYNC        | 1p35.1       | -0.20407 | 5.87E-05 | 0.000324 |
| LGI3        | 8p21.3       | -0.20405 | 5.88E-05 | 0.000324 |
| CLEC11A     | 19q13.33     | -0.20404 | 5.89E-05 | 0.000325 |
| CCND3       | 6p21.1       | 0.203994 | 5.91E-05 | 0.000326 |
| BAIAP2L2    | 22q13.1      | 0.203968 | 5.93E-05 | 0.000326 |
| SLC12A4     | 16q22.1      | -0.20387 | 5.97E-05 | 0.000329 |
| PCDHGA3     | 5q31.3       | -0.20381 | 6.00E-05 | 0.000331 |
| THBS1       | 15q14        | -0.2038  | 6.01E-05 | 0.000331 |
| HEG1        | 3q21.2       | -0.20378 | 6.02E-05 | 0.000331 |
| TBX1        | 22q11.21     | -0.20378 | 6.02E-05 | 0.000331 |
| SERTAD4-AS1 | 1q32.2       | -0.20374 | 6.04E-05 | 0.000332 |
| TREM2       | 6p21.1       | -0.20369 | 6.07E-05 | 0.000334 |
| MILR1       | 17q23.3      | -0.20368 | 6.07E-05 | 0.000334 |
| PDE3A       | 12p12.2      | -0.20368 | 6.07E-05 | 0.000334 |
| KCNJ5       | 11q24.3      | -0.20366 | 6.08E-05 | 0.000334 |
| GBGT1       | 9q34.2       | -0.20366 | 6.08E-05 | 0.000334 |
| VAMP1       | 12p13.31     | 0.203655 | 6.09E-05 | 0.000334 |
| DSTN        | 20p12.1      | -0.20363 | 6.10E-05 | 0.000335 |
|             | 1-Dec 9q33.1 | -0.20361 | 6.11E-05 | 0.000335 |
| TBC1D29P    | 17q11.2      | 0.203574 | 6.13E-05 | 0.000336 |

|           |                    |          |          |          |
|-----------|--------------------|----------|----------|----------|
| PPP3CB    | 10q22.2            | -0.20355 | 6.14E-05 | 0.000337 |
| SETD4     | 21q22.12           | 0.203535 | 6.15E-05 | 0.000337 |
| TDRD9     | 14q32.33           | -0.20352 | 6.15E-05 | 0.000337 |
| LOC283922 | 16q23.1            | 0.203457 | 6.19E-05 | 0.000339 |
| WDR73     | 15q25.2            | 0.203431 | 6.20E-05 | 0.00034  |
| FARSA     | 19p13.13           | 0.203373 | 6.23E-05 | 0.000341 |
| ZNF721    | 4p16.3             | 0.203372 | 6.23E-05 | 0.000341 |
| LOX       | 5q23.1             | -0.20328 | 6.28E-05 | 0.000344 |
| CALML6    | 1p36.33            | 0.203277 | 6.28E-05 | 0.000344 |
| SNORA71E  | 20q11.23           | 0.203255 | 6.30E-05 | 0.000344 |
| NAP1L6    | Xq13.2             | -0.20325 | 6.30E-05 | 0.000344 |
| ARCN1     | 11q23.3            | -0.20324 | 6.31E-05 | 0.000345 |
| FAM177A1  | 14q13.2            | -0.20322 | 6.32E-05 | 0.000345 |
| LRRK2     | 12q12              | -0.20318 | 6.34E-05 | 0.000346 |
| HLA-DRB6  | 6p21.32            | -0.20318 | 6.34E-05 | 0.000346 |
| FCAMR     | 1q32.1             | 0.203143 | 6.36E-05 | 0.000347 |
| CCDC122   | 13q14.11           | -0.20313 | 6.36E-05 | 0.000347 |
| EGFL8     | 6p21.32            | 0.20313  | 6.36E-05 | 0.000347 |
| THTPA     | 14q11.2            | -0.20311 | 6.38E-05 | 0.000348 |
| MMS19     | 10q24.1            | 0.203095 | 6.38E-05 | 0.000348 |
| LRRC73    | 6p21.1             | 0.203078 | 6.39E-05 | 0.000349 |
| GABRG2    | 5q34               | -0.20307 | 6.40E-05 | 0.000349 |
| ZBED1     | Xp22.33 and Yp11.2 | -0.20304 | 6.41E-05 | 0.00035  |
| FBXL2     | 3p22.3             | -0.20302 | 6.42E-05 | 0.00035  |
| HAS2      | 8q24.13            | -0.20296 | 6.45E-05 | 0.000352 |
| TOR3A     | 1q25.2             | 0.202954 | 6.46E-05 | 0.000352 |
| CD86      | 3q13.33            | -0.20295 | 6.46E-05 | 0.000352 |
| SF3A2     | 19p13.3            | 0.202919 | 6.48E-05 | 0.000353 |
| MT1F      | 16q13              | -0.20286 | 6.51E-05 | 0.000354 |
| CAPN6     | Xq23               | -0.20279 | 6.55E-05 | 0.000356 |
| ERICH5    | 8q22.2             | -0.2027  | 6.60E-05 | 0.000359 |
| STMP1     | 7q33               | -0.20267 | 6.62E-05 | 0.00036  |
| IGBP1     | Xq13.1             | -0.20265 | 6.63E-05 | 0.00036  |
| CFHR1     | 1q31.3             | -0.20262 | 6.64E-05 | 0.000361 |
| PTCRA     | 6p21.1             | -0.20259 | 6.66E-05 | 0.000362 |
| DCAF12L2  | Xq25               | -0.20258 | 6.67E-05 | 0.000362 |
| CLEC9A    | 12p13.2            | -0.20256 | 6.68E-05 | 0.000363 |
| EYA1      | 8q13.3             | -0.20248 | 6.72E-05 | 0.000365 |
| TAS2R4    | 7q34               | 0.202477 | 6.73E-05 | 0.000365 |
| RAMAC     | 15q25.2            | -0.20247 | 6.73E-05 | 0.000365 |
| AXIN1     | 16p13.3            | 0.20234  | 6.80E-05 | 0.000369 |
| POM121    | 7q11.23            | 0.202266 | 6.85E-05 | 0.000371 |
| SYNGR4    | 19q13.33           | 0.202241 | 6.86E-05 | 0.000372 |
| CD1A      | 1q23.1             | -0.20222 | 6.87E-05 | 0.000373 |
| MAP1LC3B2 | 12q24.22           | -0.20222 | 6.88E-05 | 0.000373 |
| CTF1      | 16p11.2            | -0.20221 | 6.88E-05 | 0.000373 |
| LTO1      | 11q13.3            | 0.202198 | 6.89E-05 | 0.000373 |
| TGFB1     | 19q13.2            | -0.20218 | 6.90E-05 | 0.000373 |
| UROD      | 1p34.1             | -0.20217 | 6.90E-05 | 0.000374 |
| MBNL1     | 3q25.1-q25.2       | -0.20212 | 6.93E-05 | 0.000375 |
| HIST1H2BM | 6p22.1             | 0.202091 | 6.95E-05 | 0.000376 |
| HOXB6     | 17q21.32           | 0.202081 | 6.96E-05 | 0.000376 |
| LRCH4     | 7q22.1             | 0.202046 | 6.98E-05 | 0.000377 |
| TRIM7     | 5q35.3             | 0.202044 | 6.98E-05 | 0.000377 |
| DAAM2     | 6p21.2             | -0.20204 | 6.98E-05 | 0.000377 |
| TP73-AS1  | 1p36.32            | -0.202   | 7.01E-05 | 0.000378 |
| TREH      | 11q23.3            | -0.20194 | 7.04E-05 | 0.00038  |
| DAND5     | 19p13.13           | 0.201938 | 7.04E-05 | 0.00038  |

|                        |               |          |          |          |
|------------------------|---------------|----------|----------|----------|
| PDZRN3                 | 3p13          | -0.20194 | 7.04E-05 | 0.00038  |
| TTLL10                 | 1p36.33       | 0.201906 | 7.06E-05 | 0.000381 |
| RXRG                   | 1q23.3        | -0.20187 | 7.08E-05 | 0.000382 |
| MYBL1                  | 8q13.1        | 0.201852 | 7.09E-05 | 0.000382 |
| DOCK4                  | 7q31.1        | -0.20177 | 7.14E-05 | 0.000385 |
| NDST3                  | 4q26          | -0.20173 | 7.16E-05 | 0.000386 |
| SMIM19                 | 8p11.21       | -0.20173 | 7.16E-05 | 0.000386 |
| IGFL2                  | 19q13.32      | -0.20162 | 7.23E-05 | 0.000389 |
| MED28                  | 4p15.32       | -0.20161 | 7.24E-05 | 0.00039  |
| SETD6                  | 16q21         | 0.201544 | 7.28E-05 | 0.000392 |
| SRRM5                  | 19q13.31      | 0.201544 | 7.28E-05 | 0.000392 |
| DTX2P1-UPK3BP1-PMS2P11 | 7q11.23       | 0.201535 | 7.28E-05 | 0.000392 |
| AMPH                   | 7p14.1        | -0.20152 | 7.29E-05 | 0.000392 |
| TSHZ2                  | 20q13.2       | -0.20151 | 7.30E-05 | 0.000393 |
| CHML                   | 1q43          | 0.201468 | 7.32E-05 | 0.000394 |
| CXCL3                  | 4q13.3        | 0.20146  | 7.33E-05 | 0.000394 |
| PIRT                   | 17p12         | -0.20146 | 7.33E-05 | 0.000394 |
| SHISAL2A               | 1p32.3        | -0.20145 | 7.34E-05 | 0.000394 |
| EHD3                   | 2p23.1        | -0.20143 | 7.35E-05 | 0.000395 |
| XRCC1                  | 19q13.31      | 0.201394 | 7.37E-05 | 0.000396 |
| TBC1D15                | 12q21.1       | -0.20139 | 7.37E-05 | 0.000396 |
| BMP6                   | 6p24.3        | -0.20139 | 7.37E-05 | 0.000396 |
| ZSCAN21                | 7q22.1        | -0.20139 | 7.37E-05 | 0.000396 |
| EXTL2                  | 1p21.2        | -0.20134 | 7.40E-05 | 0.000397 |
| PAXBP1                 | 21q22.11      | 0.201258 | 7.46E-05 | 0.0004   |
| LIN54                  | 4q21.22       | 0.201258 | 7.46E-05 | 0.0004   |
| WDR70                  | 5p13.2        | -0.20125 | 7.46E-05 | 0.0004   |
| NUP85                  | 17q25.1       | 0.201218 | 7.48E-05 | 0.000401 |
| OPRL1                  | 20q13.33      | -0.20121 | 7.48E-05 | 0.000401 |
| CCN4                   | 8q24.22       | -0.20115 | 7.52E-05 | 0.000403 |
| STK32A                 | 5q32          | -0.2011  | 7.55E-05 | 0.000404 |
| ACTL8                  | 1p36.13       | 0.201083 | 7.57E-05 | 0.000405 |
| PJA1                   | Xq13.1        | -0.20108 | 7.57E-05 | 0.000405 |
| MSN                    | Xq12          | -0.20106 | 7.58E-05 | 0.000405 |
| UBR4                   | 1p36.13       | 0.201061 | 7.58E-05 | 0.000405 |
| CENPBD1                | 16q24.3       | -0.20104 | 7.60E-05 | 0.000406 |
| FRS2                   | 12q15         | -0.20101 | 7.61E-05 | 0.000407 |
| ZFR2                   | 19p13.3       | -0.20099 | 7.62E-05 | 0.000407 |
| TMEFF2                 | 2q32.3        | -0.20099 | 7.63E-05 | 0.000408 |
| CMYA5                  | 5q14.1        | -0.20098 | 7.63E-05 | 0.000408 |
| TMEM80                 | 11p15.5       | 0.200915 | 7.67E-05 | 0.00041  |
| RFX1                   | 19p13.12      | 0.200846 | 7.72E-05 | 0.000412 |
| SPTA1                  | 1q23.1        | -0.20082 | 7.74E-05 | 0.000413 |
| FAM20C                 | 7p22.3        | -0.20079 | 7.76E-05 | 0.000414 |
| DHX30                  | 3p21.31       | 0.200771 | 7.77E-05 | 0.000414 |
| SLC35F1                | 6q22.2-q22.31 | -0.20066 | 7.84E-05 | 0.000418 |
| FCGR1A                 | 1q21.2        | -0.20065 | 7.84E-05 | 0.000418 |
| SV2A                   | 1q21.2        | -0.20064 | 7.85E-05 | 0.000418 |
| CLIC6                  | 21q22.12      | -0.20057 | 7.90E-05 | 0.000421 |
| LOC391322              | 22q11.23      | 0.200554 | 7.91E-05 | 0.000421 |
| CHPF                   | 2q35          | -0.20055 | 7.91E-05 | 0.000422 |
| MMRN2                  | 10q23.2       | -0.20053 | 7.92E-05 | 0.000422 |
| KCNA5                  | 12p13.32      | -0.20046 | 7.98E-05 | 0.000425 |
| PHLPP2                 | 16q22.2       | 0.200423 | 8.00E-05 | 0.000426 |
| MGAT1                  | 5q35.3        | -0.2004  | 8.01E-05 | 0.000426 |
| REEP1                  | 2p11.2        | -0.20031 | 8.07E-05 | 0.00043  |
| TRIM15                 | 6p22.1        | 0.200304 | 8.08E-05 | 0.00043  |
| RAB7A                  | 3q21.3        | -0.2003  | 8.08E-05 | 0.00043  |



|           |               |          |          |          |
|-----------|---------------|----------|----------|----------|
| ANAPC7    | 12q24.11      | 0.200293 | 8.08E-05 | 0.00043  |
| PSME4     | 2p16.2        | 0.200196 | 8.15E-05 | 0.000433 |
| ARMCX3    | Xq22.1        | -0.20017 | 8.17E-05 | 0.000434 |
| MPHOSPH9  | 12q24.31      | 0.200098 | 8.22E-05 | 0.000436 |
| BTN2A3P   | 6p22.2        | 0.200053 | 8.25E-05 | 0.000438 |
| CNEP1R1   | 16q12.1       | -0.20005 | 8.25E-05 | 0.000438 |
| H3F3B     | 17q25.1       | -0.20005 | 8.25E-05 | 0.000438 |
| A1BG      | 19q13.43      | -0.20003 | 8.26E-05 | 0.000438 |
| C11ORF71  | 11q23.2       | -0.20001 | 8.28E-05 | 0.000439 |
| IQGAP2    | 5q13.3        | 0.199987 | 8.29E-05 | 0.00044  |
| HCST      | 19q13.12      | -0.19998 | 8.30E-05 | 0.00044  |
| AIP       | 11q13.2       | -0.19997 | 8.31E-05 | 0.00044  |
| WDR47     | 1p13.3        | -0.19992 | 8.34E-05 | 0.000442 |
| MAGEL2    | 15q11.2       | -0.1999  | 8.35E-05 | 0.000442 |
| UPK3BL1   | 7q22.1        | 0.199883 | 8.37E-05 | 0.000443 |
| DAZL      | 3p24.3        | -0.19987 | 8.38E-05 | 0.000443 |
| TLR9      | 3p21.2        | -0.19986 | 8.38E-05 | 0.000444 |
| ADORA3    | 1p13.2        | -0.19985 | 8.39E-05 | 0.000444 |
| PCDHA2    | 5q31.3        | -0.19984 | 8.39E-05 | 0.000444 |
| TTC25     | 17q21.2       | -0.19984 | 8.40E-05 | 0.000444 |
| TMEM163   | 2q21.3        | -0.19981 | 8.42E-05 | 0.000445 |
| TCIRG1    | 11q13.2       | 0.199629 | 8.55E-05 | 0.000452 |
| TSPAN33   | 7q32.1        | -0.19956 | 8.59E-05 | 0.000454 |
| SELP      | 1q24.2        | -0.19954 | 8.61E-05 | 0.000455 |
| EML2      | 19q13.32      | 0.199516 | 8.63E-05 | 0.000456 |
| GDF5      | 20q11.22      | -0.19951 | 8.63E-05 | 0.000456 |
| ZNF804A   | 2q32.1        | -0.1995  | 8.64E-05 | 0.000456 |
| PTH1R     | 3p21.31       | -0.19948 | 8.65E-05 | 0.000457 |
| MRPS25    | 3p25.1        | 0.199472 | 8.66E-05 | 0.000457 |
| RALYL     | 8q21.2        | -0.19947 | 8.66E-05 | 0.000457 |
| PDGFRB    | 5q32          | -0.19946 | 8.66E-05 | 0.000457 |
| SEMA4D    | 9q22.2        | 0.199461 | 8.67E-05 | 0.000457 |
| IMPG1     | 6q14.1        | 0.199449 | 8.68E-05 | 0.000457 |
| WRAP73    | 1p36.32       | 0.199446 | 8.68E-05 | 0.000457 |
| FAT3      | 11q14.3       | -0.19943 | 8.69E-05 | 0.000458 |
| UNC80     | 2q34          | -0.19943 | 8.69E-05 | 0.000458 |
| PLEKHA7   | 11p15.2-p15.1 | 0.19941  | 8.70E-05 | 0.000458 |
| PPCS      | 1p34.2        | -0.1994  | 8.71E-05 | 0.000458 |
| ZNF420    | 19q13.12      | -0.19937 | 8.73E-05 | 0.00046  |
| KCTD8     | 4p13          | -0.19928 | 8.80E-05 | 0.000463 |
| POSTN     | 13q13.3       | -0.19927 | 8.81E-05 | 0.000463 |
| GART      | 21q22.11      | 0.199255 | 8.82E-05 | 0.000464 |
| ITCH      | 20q11.22      | -0.19921 | 8.85E-05 | 0.000465 |
| CMC2      | 16q23.2       | 0.199162 | 8.89E-05 | 0.000467 |
| SHC4      | 15q21.1       | -0.19916 | 8.89E-05 | 0.000467 |
| PROB1     | 5q31.2        | 0.19913  | 8.91E-05 | 0.000468 |
| LOC441666 | 10q11.21      | -0.19911 | 8.92E-05 | 0.000468 |
| FAM166A   | 9q34.3        | 0.199112 | 8.92E-05 | 0.000468 |
| TXNDC2    | 18p11.22      | -0.19911 | 8.92E-05 | 0.000468 |
| LATS2     | 13q12.11      | -0.1991  | 8.93E-05 | 0.000469 |
| CD302     | 2q24.2        | -0.1991  | 8.93E-05 | 0.000469 |
| ZSCAN26   | 6p22.1        | -0.19909 | 8.94E-05 | 0.000469 |
| FGFR1OP2  | 12p11.23      | -0.19909 | 8.94E-05 | 0.000469 |
| GRIA4     | 11q22.3       | -0.19908 | 8.95E-05 | 0.000469 |
| PSMB4     | 1q21.3        | 0.199076 | 8.95E-05 | 0.000469 |
| CMAHP     | 6p22.3        | -0.19907 | 8.96E-05 | 0.000469 |
| TNFRSF9   | 1p36.23       | -0.199   | 9.00E-05 | 0.000472 |
| TNFSF8    | 9q32-q33.1    | -0.19897 | 9.03E-05 | 0.000473 |

|           |              |          |          |          |
|-----------|--------------|----------|----------|----------|
| GNAL      | 18p11.21     | -0.19896 | 9.04E-05 | 0.000473 |
| MCM3AP    | 21q22.3      | 0.198956 | 9.04E-05 | 0.000473 |
| ATP10A    | 15q12        | -0.19892 | 9.06E-05 | 0.000474 |
| GATM      | 15q21.1      | -0.19886 | 9.11E-05 | 0.000476 |
| PRR16     | 5q23.1       | -0.19886 | 9.11E-05 | 0.000476 |
| COMMD7    | 20q11.21     | -0.19885 | 9.12E-05 | 0.000477 |
| PSD3      | 8p22         | -0.19883 | 9.13E-05 | 0.000477 |
| CCNL1     | 3q25.31      | 0.198818 | 9.14E-05 | 0.000478 |
| DNAAF3    | 19q13.42     | 0.198816 | 9.15E-05 | 0.000478 |
| TSKU      | 11q13.5      | -0.19877 | 9.18E-05 | 0.000479 |
| CXCL14    | 5q31.1       | -0.19877 | 9.18E-05 | 0.000479 |
| SSC5D     | 19q13.42     | -0.19873 | 9.21E-05 | 0.000481 |
| PGM1      | 1p31.3       | -0.19873 | 9.21E-05 | 0.000481 |
| ZNF655    | 7q22.1       | -0.19872 | 9.22E-05 | 0.000481 |
| INHBA     | 7p14.1       | -0.1987  | 9.23E-05 | 0.000482 |
| MID2      | Xq22.3       | -0.1987  | 9.23E-05 | 0.000482 |
| CTSA      | 20q13.12     | -0.1987  | 9.24E-05 | 0.000482 |
| REXO4     | 9q34.2       | 0.198648 | 9.27E-05 | 0.000483 |
| S100B     | 21q22.3      | -0.19862 | 9.29E-05 | 0.000484 |
| GZMB      | 14q12        | -0.19861 | 9.30E-05 | 0.000484 |
| C1ORF220  | 1q25.2       | 0.198609 | 9.30E-05 | 0.000484 |
| NDUFA7    | 19p13.2      | 0.198538 | 9.36E-05 | 0.000487 |
| RETREG1   | 5p15.1       | -0.1985  | 9.39E-05 | 0.000489 |
| DCP1B     | 12p13.33     | -0.19849 | 9.39E-05 | 0.000489 |
| OTUD1     | 10p12.2      | -0.19846 | 9.42E-05 | 0.00049  |
| LSP1      | 11p15.5      | -0.19843 | 9.45E-05 | 0.000491 |
| BET1      | 7q21.3       | -0.19841 | 9.46E-05 | 0.000492 |
| CALML3    | 10p15.1      | -0.1984  | 9.47E-05 | 0.000492 |
| TFPI      | 2q32.1       | -0.19839 | 9.47E-05 | 0.000492 |
| CETN4P    | 4q27         | -0.19839 | 9.48E-05 | 0.000492 |
| CACNA2D3  | 3p21.1-p14.3 | -0.19835 | 9.50E-05 | 0.000494 |
| ATP5F1EP2 | 13q12.2      | -0.19834 | 9.52E-05 | 0.000494 |
| EPS15L1   | 19p13.11     | 0.198333 | 9.52E-05 | 0.000494 |
| CCL17     | 16q21        | -0.19833 | 9.52E-05 | 0.000494 |
| IL23A     | 12q13.3      | -0.19832 | 9.53E-05 | 0.000495 |
| SNHG15    | 7p13         | 0.198313 | 9.54E-05 | 0.000495 |
| FCGR1B    | 1p11.2       | -0.19826 | 9.58E-05 | 0.000497 |
| CD53      | 1p13.3       | -0.19824 | 9.59E-05 | 0.000497 |
| ACTR3C    | 7q36.1       | -0.19818 | 9.64E-05 | 0.0005   |
| LUC7L2    | 7q34         | 0.198163 | 9.66E-05 | 0.0005   |
| DDX19B    | 16q22.1      | -0.19815 | 9.67E-05 | 0.000501 |
| PGF       | 14q24.3      | -0.19812 | 9.69E-05 | 0.000502 |
| MAST2     | 1p34.1       | 0.198122 | 9.69E-05 | 0.000502 |
| NFASC     | 1q32.1       | -0.1981  | 9.70E-05 | 0.000502 |
| ADGRL2    | 1p31.1       | -0.1981  | 9.70E-05 | 0.000502 |
| TCN2      | 22q12.2      | -0.1981  | 9.71E-05 | 0.000502 |
| GAL3ST4   | 7q22.1       | -0.19807 | 9.73E-05 | 0.000503 |
| ZBTB16    | 11q23.2      | -0.19803 | 9.76E-05 | 0.000505 |
| LYPD8     | 1q44         | -0.19802 | 9.77E-05 | 0.000505 |
| PHF24     | 9p13.3       | -0.19801 | 9.78E-05 | 0.000505 |
| LTB       | 6p21.33      | -0.19799 | 9.80E-05 | 0.000506 |
| SLC40A1   | 2q32.2       | -0.19798 | 9.80E-05 | 0.000506 |
| PID1      | 2q36.3       | -0.19798 | 9.81E-05 | 0.000506 |
| ENTPD1    | 10q24.1      | -0.19797 | 9.81E-05 | 0.000507 |
| TUBA3E    | 2q21.1       | 0.197923 | 9.85E-05 | 0.000508 |
| PGGHG     | 11p15.5      | 0.197911 | 9.86E-05 | 0.000509 |
| RBM8A     | 1q21.1       | 0.1979   | 9.87E-05 | 0.000509 |
| C8ORF31   | 8q24.3       | -0.19789 | 9.88E-05 | 0.00051  |

|              |               |          |          |          |
|--------------|---------------|----------|----------|----------|
| SOX5         | 12p12.1       | -0.19788 | 9.88E-05 | 0.00051  |
| C6ORF15      | 6p21.33       | -0.19787 | 9.89E-05 | 0.00051  |
| ZNF589       | 3p21.31       | 0.197867 | 9.89E-05 | 0.00051  |
| GRIN1        | 9q34.3        | 0.197837 | 9.92E-05 | 0.000511 |
| HIF3A        | 19q13.32      | -0.1978  | 9.95E-05 | 0.000512 |
| SELENOK      | 3p21.1        | -0.1978  | 9.95E-05 | 0.000512 |
| CENPU        | 4q35.1        | 0.197783 | 9.96E-05 | 0.000513 |
| HAVCR2       | 5q33.3        | -0.19776 | 9.98E-05 | 0.000514 |
| SLC6A10P     | 16p11.2       | 0.197756 | 9.99E-05 | 0.000514 |
| ZNF532       | 18q21.32      | -0.19772 | 0.0001   | 0.000515 |
| CC2D2A       | 4p15.32       | -0.19767 | 0.000101 | 0.000517 |
| MRPS34       | 16p13.3       | 0.197668 | 0.000101 | 0.000517 |
| NFE2L2       | 2q31.2        | -0.19766 | 0.000101 | 0.000517 |
| B3GALNT2     | 1q42.3        | 0.197608 | 0.000101 | 0.000519 |
| CCDC152      | 5p12          | -0.19759 | 0.000101 | 0.00052  |
| RNF146       | 6q22.33       | -0.19757 | 0.000101 | 0.000521 |
| SRSF3        | 6p21.31-p21.2 | 0.197564 | 0.000101 | 0.000521 |
| LOC100240735 | 12q13.13      | -0.19756 | 0.000101 | 0.000521 |
| PCDHGA4      | 5q31.3        | -0.19753 | 0.000102 | 0.000522 |
| GBE1         | 3p12.2        | -0.19747 | 0.000102 | 0.000525 |
| SERTAD1      | 19q13.2       | -0.19746 | 0.000102 | 0.000525 |
| DNAJC4       | 11q13.1       | -0.19746 | 0.000102 | 0.000525 |
| SLC25A42     | 19p13.11      | -0.19745 | 0.000102 | 0.000525 |
| FAT4         | 4q28.1        | -0.19743 | 0.000103 | 0.000526 |
| ATXN1        | 6p22.3        | -0.19739 | 0.000103 | 0.000527 |
| EXOSC9       | 4q27          | 0.197388 | 0.000103 | 0.000527 |
| KIF1A        | 2q37.3        | -0.19739 | 0.000103 | 0.000527 |
| COLEC12      | 18p11.32      | -0.19736 | 0.000103 | 0.000528 |
| STIM1        | 11p15.4       | -0.19734 | 0.000103 | 0.000529 |
| STK17A       | 7p13          | -0.19728 | 0.000104 | 0.000532 |
| SYT1         | 12q21.2       | -0.19722 | 0.000104 | 0.000534 |
| TNFRSF1A     | 12p13.31      | -0.19721 | 0.000105 | 0.000535 |
| AFMID        | 17q25.3       | -0.1972  | 0.000105 | 0.000535 |
| C12ORF42     | 12q23.2-q23.3 | -0.19719 | 0.000105 | 0.000535 |
| TTYH2        | 17q25.1       | -0.19719 | 0.000105 | 0.000535 |
| MARK1        | 1q41          | -0.19718 | 0.000105 | 0.000535 |
| SLC26A7      | 8q21.3        | -0.19718 | 0.000105 | 0.000535 |
| EMP2         | 16p13.13      | 0.19718  | 0.000105 | 0.000535 |
| TMEM263      | 12q23.3       | -0.19718 | 0.000105 | 0.000535 |
| FRMD4A       | 10p13         | -0.19709 | 0.000106 | 0.000539 |
| SUPV3L1      | 10q22.1       | 0.197054 | 0.000106 | 0.00054  |
| SYNDIG1L     | 14q24.3       | -0.19702 | 0.000106 | 0.000541 |
| RNFT2        | 12q24.22      | 0.196997 | 0.000106 | 0.000542 |
| ZBTB47       | 3p22.1        | -0.19697 | 0.000107 | 0.000543 |
| CRIM1        | 2p22.2        | -0.19691 | 0.000107 | 0.000546 |
| NKX3-1       | 8p21.2        | -0.19689 | 0.000107 | 0.000547 |
| LOC399815    | 10q26.13      | 0.196849 | 0.000108 | 0.000548 |
| PIGO         | 9p13.3        | 0.196805 | 0.000108 | 0.00055  |
| FHL3         | 1p34.3        | -0.19677 | 0.000108 | 0.000552 |
| PDIA6        | 2p25.1        | -0.19676 | 0.000108 | 0.000552 |
| GALNT11      | 7q36.1 7q36.1 | -0.19675 | 0.000109 | 0.000552 |
| EXOSC3       | 9p13.2        | 0.196699 | 0.000109 | 0.000555 |
| CPSF7        | 11q12.2       | 0.196666 | 0.000109 | 0.000556 |
| PPOX         | 1q23.3        | 0.196628 | 0.00011  | 0.000558 |
| LINC00889    | Xq26.3        | -0.19661 | 0.00011  | 0.000558 |
| SIAH3        | 13q14.13      | -0.19658 | 0.00011  | 0.000559 |
| PDXK         | 21q22.3       | 0.19654  | 0.00011  | 0.000561 |
| XAB2         | 19p13.2       | 0.196524 | 0.000111 | 0.000562 |

|            |                |          |          |          |
|------------|----------------|----------|----------|----------|
| TNS3       | 7p12.3         | -0.19651 | 0.000111 | 0.000562 |
| TMEM51-AS1 | 1p36.21        | 0.196501 | 0.000111 | 0.000563 |
| CHMP1B     | 18p11.21       | -0.19649 | 0.000111 | 0.000563 |
| C5         | 9q33.2         | 0.196474 | 0.000111 | 0.000563 |
| ETV4       | 17q21.31       | 0.196468 | 0.000111 | 0.000564 |
| TCF21      | 6q23.2         | -0.19646 | 0.000111 | 0.000564 |
| RYK        | 3q22.2         | -0.19645 | 0.000111 | 0.000564 |
| SNORA31    | 13q14.13       | 0.196414 | 0.000112 | 0.000566 |
| ENPP1      | 6q23.2         | -0.19638 | 0.000112 | 0.000567 |
| C1ORF140   | 1q41           | -0.19632 | 0.000112 | 0.00057  |
| GNA11      | 19p13.3        | 0.196295 | 0.000113 | 0.000571 |
| C20ORF144  | 20q11.22       | 0.196289 | 0.000113 | 0.000571 |
| APBB2      | 4p14-p13       | -0.19628 | 0.000113 | 0.000571 |
| CD72       | 9p13.3         | -0.19627 | 0.000113 | 0.000572 |
| MANBA      | 4q24           | -0.19626 | 0.000113 | 0.000572 |
| MYOC       | 1q24.3         | -0.19624 | 0.000113 | 0.000573 |
| ARRDC3-AS1 | 5q14.3         | 0.196229 | 0.000113 | 0.000573 |
| ITGB5      | 3q21.2         | -0.19622 | 0.000113 | 0.000573 |
| ATXN2      | 12q24.12       | 0.196214 | 0.000113 | 0.000573 |
| COLEC11    | 2p25.3         | -0.19621 | 0.000113 | 0.000574 |
| GPR160     | 3q26.2         | -0.19618 | 0.000114 | 0.000575 |
| LUZP2      | 11p14.3        | -0.19616 | 0.000114 | 0.000575 |
| SPATA12    | 3p14.3         | -0.19616 | 0.000114 | 0.000576 |
| SMAD4      | 18q21.2        | -0.19615 | 0.000114 | 0.000576 |
| DNAJB14    | 4q23           | -0.1961  | 0.000114 | 0.000578 |
| UNC13B     | 9p13.3         | 0.196063 | 0.000115 | 0.00058  |
| MFAP3      | 5q33.2         | -0.19602 | 0.000115 | 0.000582 |
| THBD       | 20p11.21       | -0.19598 | 0.000116 | 0.000583 |
| ATXN7      | 3p14.1         | 0.195971 | 0.000116 | 0.000584 |
| ADD1       | 4p16.3         | -0.19595 | 0.000116 | 0.000585 |
| SARDH      | 9q34.2         | -0.19592 | 0.000116 | 0.000586 |
| HOXA2      | 7p15.2         | 0.19591  | 0.000116 | 0.000586 |
| ATG4D      | 19p13.2        | 0.195909 | 0.000116 | 0.000586 |
| KIT        | 4q12           | -0.19589 | 0.000116 | 0.000587 |
| ZNF561     | 19p13.2        | -0.19585 | 0.000117 | 0.000588 |
| GPR87      | 3q25.1         | -0.19584 | 0.000117 | 0.000589 |
| ANGPTL2    | 9q33.3         | -0.19583 | 0.000117 | 0.000589 |
| TUFM       | 16p11.2        | 0.195796 | 0.000117 | 0.000591 |
| TP53BP2    | 1q41           | 0.195788 | 0.000117 | 0.000591 |
| LRMDA      | 10q22.2-q22.3  | -0.19578 | 0.000117 | 0.000591 |
| SREK1      | 5q12.3         | 0.195748 | 0.000118 | 0.000592 |
| TLL1       | 4q32.3         | -0.19573 | 0.000118 | 0.000593 |
| CDIP1      | 16p13.3        | -0.19573 | 0.000118 | 0.000593 |
| LINC00908  | 18q23          | -0.1957  | 0.000118 | 0.000594 |
| CLEC16A    | 16p13.13       | 0.195694 | 0.000118 | 0.000594 |
| SLC38A2    | 12q13.11       | -0.19569 | 0.000118 | 0.000594 |
| IGSF9      | 1q23.2         | 0.195667 | 0.000119 | 0.000596 |
| CCDC142    | 2p13.1         | 0.195649 | 0.000119 | 0.000596 |
| CCDC61     | 19q13.32       | 0.195646 | 0.000119 | 0.000596 |
| SLC28A3    | 9q21.32-q21.33 | 0.195637 | 0.000119 | 0.000597 |
| CGB5       | 19q13.33       | -0.19563 | 0.000119 | 0.000597 |
| LILRA2     | 19q13.42       | -0.1956  | 0.000119 | 0.000598 |
| SPCS2P4    | 1p35.3         | -0.19559 | 0.000119 | 0.000599 |
| RWDD3      | 1p21.3         | -0.19555 | 0.00012  | 0.0006   |
| PTX3       | 3q25.32        | -0.19552 | 0.00012  | 0.000602 |
| MVK        | 12q24.11       | 0.195496 | 0.00012  | 0.000603 |
| RIMS1      | 6q13           | -0.19549 | 0.00012  | 0.000603 |
| JAK1       | 1p31.3         | -0.19546 | 0.000121 | 0.000604 |

|           |                 |          |          |          |
|-----------|-----------------|----------|----------|----------|
| SCG2      | 2q36.1          | -0.19544 | 0.000121 | 0.000605 |
| C2CD3     | 11q13.4         | 0.195425 | 0.000121 | 0.000605 |
| ZNF569    | 19q13.12        | -0.19542 | 0.000121 | 0.000605 |
| TRRAP     | 7q22.1          | 0.195418 | 0.000121 | 0.000605 |
| SIPA1L3   | 19q13.13-q13.2  | 0.195417 | 0.000121 | 0.000605 |
| PRTG      | 15q21.3         | -0.19539 | 0.000121 | 0.000606 |
| FNDC3B    | 3q26.31         | -0.19539 | 0.000121 | 0.000606 |
| SIRPA     | 20p13           | -0.19537 | 0.000121 | 0.000607 |
| ARHGAP27  | 17q21.31        | 0.195366 | 0.000122 | 0.000607 |
| ZNF564    | 19p13.2         | -0.19536 | 0.000122 | 0.000608 |
| GRAMD1C   | 3q13.31         | -0.19532 | 0.000122 | 0.000609 |
| MAGT1     | Xq21.1          | -0.19532 | 0.000122 | 0.000609 |
| BTBD11    | 12q23.3         | -0.19529 | 0.000122 | 0.000611 |
| GLIS2     | 16p13.3         | -0.19528 | 0.000122 | 0.000611 |
| HNRNPUL1  | 19q13.2         | 0.195234 | 0.000123 | 0.000613 |
| MTMR6     | 13q12.13        | -0.19522 | 0.000123 | 0.000613 |
| ATG7      | 3p25.3          | -0.1952  | 0.000123 | 0.000614 |
| ADCYAP1R1 | 7p14.3          | -0.19519 | 0.000123 | 0.000615 |
| NIBAN1    | 1q25.3          | -0.19519 | 0.000123 | 0.000615 |
| DMD       | Xp21.2-p21.1    | -0.19509 | 0.000124 | 0.000619 |
| IQSEC1    | 3p25.2-p25.1    | -0.19509 | 0.000124 | 0.000619 |
| SPATA46   | 1q23.3          | 0.195087 | 0.000124 | 0.000619 |
| PDE5A     | 4q26            | -0.19507 | 0.000125 | 0.00062  |
| MOCOS     | 18q12.2         | 0.195023 | 0.000125 | 0.000622 |
| RPUSD1    | 16p13.3         | 0.19502  | 0.000125 | 0.000622 |
| RPL23AP7  | 2q14.1          | -0.195   | 0.000125 | 0.000623 |
| NUP98     | 11p15.4         | 0.194978 | 0.000125 | 0.000624 |
| SLC27A4   | 9q34.11         | 0.19497  | 0.000126 | 0.000624 |
| IL12B     | 5q33.3          | -0.19496 | 0.000126 | 0.000625 |
| RAB9A     | Xp22.2          | -0.19495 | 0.000126 | 0.000625 |
| TIGD7     | 16p13.3         | -0.19494 | 0.000126 | 0.000625 |
| DLC1      | 8p22            | -0.19494 | 0.000126 | 0.000626 |
| SNX21     | 20q13.12        | -0.19492 | 0.000126 | 0.000626 |
| C1ORF21   | 1q25.3          | 0.194909 | 0.000126 | 0.000627 |
| VPS52     | 6p21.32         | 0.194856 | 0.000127 | 0.000629 |
| CCDC178   | 18q12.1         | -0.19483 | 0.000127 | 0.00063  |
| GPSM3     | 6p21.32         | -0.19483 | 0.000127 | 0.00063  |
| GTF2A1L   | 2p16.3          | -0.19478 | 0.000127 | 0.000632 |
| UBE2D1    | 10q21.1         | -0.19476 | 0.000128 | 0.000634 |
| CYLD      | 16q12.1         | -0.19475 | 0.000128 | 0.000634 |
| LINC00662 | 19q11           | -0.19475 | 0.000128 | 0.000634 |
| ZNF208    | 19p12           | -0.19473 | 0.000128 | 0.000634 |
| TMEM87A   | 15q15.1         | -0.19472 | 0.000128 | 0.000635 |
| FERMT3    | 11q13.1         | -0.19471 | 0.000128 | 0.000635 |
| CHST11    | 12q23.3         | -0.19468 | 0.000129 | 0.000637 |
| DDN       | 12q13.12        | 0.194666 | 0.000129 | 0.000637 |
| TSPAN4    | 11p15.5         | -0.19466 | 0.000129 | 0.000637 |
| RBM19     | 12q24.13-q24.21 | 0.194655 | 0.000129 | 0.000637 |
| COX8A     | 11q13.1         | 0.194616 | 0.000129 | 0.000639 |
| TBC1D32   | 6q22.31         | -0.19461 | 0.000129 | 0.000639 |
| SYNE1     | 6q25.2          | -0.19459 | 0.000129 | 0.00064  |
| FCER1G    | 1q23.3          | -0.19453 | 0.00013  | 0.000643 |
| ADH1B     | 4q23            | -0.19442 | 0.000131 | 0.000649 |
| VSIR      | 10q22.1         | -0.19441 | 0.000131 | 0.000649 |
| TMEM26    | 10q21.2         | -0.19441 | 0.000131 | 0.000649 |
| S100A14   | 1q21.3          | 0.194394 | 0.000132 | 0.00065  |
| FAAP100   | 17q25.3         | 0.194392 | 0.000132 | 0.00065  |
| SMARCD3   | 7q36.1          | -0.19436 | 0.000132 | 0.000651 |

|           |          |          |          |          |
|-----------|----------|----------|----------|----------|
| SORL1     | 11q24.1  | -0.19433 | 0.000132 | 0.000653 |
| FAM118A   | 22q13.31 | 0.194326 | 0.000132 | 0.000653 |
| ADAMTS5   | 21q21.3  | -0.19431 | 0.000132 | 0.000653 |
| SPATA5L1  | 15q21.1  | 0.194275 | 0.000133 | 0.000655 |
| GMEB2     | 20q13.33 | 0.194224 | 0.000133 | 0.000658 |
| ZNF425    | 7q36.1   | -0.19421 | 0.000134 | 0.000658 |
| YAP1      | 11q22.1  | -0.19421 | 0.000134 | 0.000658 |
| GALNT15   | 3p25.1   | -0.19416 | 0.000134 | 0.000661 |
| MMP2      | 16q12.2  | -0.19412 | 0.000135 | 0.000662 |
| EMP1      | 12p13.1  | -0.19412 | 0.000135 | 0.000662 |
| RHOB      | 2p24.1   | -0.19411 | 0.000135 | 0.000663 |
| GPR88     | 1p21.2   | -0.1941  | 0.000135 | 0.000663 |
| SREBF2    | 22q13.2  | 0.194101 | 0.000135 | 0.000663 |
| PHF23     | 17p13.1  | -0.19407 | 0.000135 | 0.000665 |
| LXN       | 3q25.32  | -0.19403 | 0.000136 | 0.000666 |
| KMT2D     | 12q13.12 | 0.194012 | 0.000136 | 0.000667 |
| BEX2      | Xq22.2   | -0.19395 | 0.000136 | 0.000671 |
| DNAJC5B   | 8q13.1   | -0.19392 | 0.000137 | 0.000672 |
| ZNF135    | 19q13.43 | -0.19388 | 0.000137 | 0.000674 |
| TMEM101   | 17q21.31 | -0.19384 | 0.000138 | 0.000676 |
| PCGF5     | 10q23.32 | -0.19384 | 0.000138 | 0.000676 |
| C19ORF47  | 19q13.2  | 0.193819 | 0.000138 | 0.000677 |
| VPS41     | 7p14.1   | -0.19376 | 0.000139 | 0.00068  |
| BCS1L     | 2q35     | 0.193748 | 0.000139 | 0.00068  |
| NRP2      | 2q33.3   | -0.19375 | 0.000139 | 0.00068  |
| CPZ       | 4p16.1   | -0.19373 | 0.000139 | 0.000681 |
| NMU       | 4q12     | 0.193681 | 0.000139 | 0.000684 |
| RNF4      | 4p16.3   | 0.193603 | 0.00014  | 0.000688 |
| CDON      | 11q24.2  | -0.19355 | 0.000141 | 0.000691 |
| SYCE2     | 19p13.13 | 0.193525 | 0.000141 | 0.000692 |
| ARHGAP8   | 22q13.31 | 0.193523 | 0.000141 | 0.000692 |
| HSD17B7P2 | 10p11.1  | 0.193495 | 0.000142 | 0.000693 |
| ZNF473    | 19q13.33 | 0.193477 | 0.000142 | 0.000694 |
| USP48     | 1p36.12  | 0.193463 | 0.000142 | 0.000695 |
| USF1      | 1q23.3   | 0.193393 | 0.000143 | 0.000699 |
| PALB2     | 16p12.2  | 0.193387 | 0.000143 | 0.000699 |
| RRP36     | 6p21.1   | 0.193373 | 0.000143 | 0.000699 |
| PROCA1    | 17q11.2  | 0.19336  | 0.000143 | 0.0007   |
| SNORA50C  | 17q23.3  | 0.193355 | 0.000143 | 0.0007   |
| EEF1E1    | 6p24.3   | 0.193347 | 0.000143 | 0.0007   |
| DDR2      | 1q23.3   | -0.1933  | 0.000144 | 0.000703 |
| NPY1R     | 4q32.2   | -0.19329 | 0.000144 | 0.000703 |
| CERCAM    | 9q34.11  | -0.19323 | 0.000145 | 0.000706 |
| TLX1NB    | 10q24.31 | 0.193195 | 0.000145 | 0.000708 |
| HGH1      | 8q24.3   | 0.193183 | 0.000145 | 0.000709 |
| WDR17     | 4q34.2   | -0.19314 | 0.000146 | 0.000711 |
| GTF2IRD2B | 7q11.23  | -0.19308 | 0.000146 | 0.000714 |
| CCDC86    | 11q12.2  | 0.193073 | 0.000146 | 0.000715 |
| CBR4      | 4q32.3   | -0.19303 | 0.000147 | 0.000717 |
| ABRA      | 8q23.1   | -0.19301 | 0.000147 | 0.000718 |
| PRL       | 6p22.3   | -0.19299 | 0.000147 | 0.000719 |
| CTCF      | 20q13.31 | 0.192943 | 0.000148 | 0.000721 |
| WHAMMP3   | 15q11.2  | -0.19294 | 0.000148 | 0.000722 |
| NOP9      | 14q12    | 0.192909 | 0.000148 | 0.000723 |
| KIAA0556  | 16p12.1  | 0.192884 | 0.000149 | 0.000724 |
| DTD2      | 14q12    | -0.19288 | 0.000149 | 0.000724 |
| DSN1      | 20q11.23 | 0.192872 | 0.000149 | 0.000725 |
| BNIP3L    | 8p21.2   | -0.19284 | 0.000149 | 0.000726 |

|           |          |          |          |          |
|-----------|----------|----------|----------|----------|
| CHSY3     | 5q23.3   | -0.19279 | 0.00015  | 0.000729 |
| AAAS      | 12q13.13 | 0.19279  | 0.00015  | 0.000729 |
| LYAR      | 4p16.3   | 0.192721 | 0.000151 | 0.000733 |
| PAAF1     | 11q13.4  | -0.19272 | 0.000151 | 0.000733 |
| DYNC2H1   | 11q22.3  | -0.19271 | 0.000151 | 0.000733 |
| C12ORF74  | 12q22    | -0.19271 | 0.000151 | 0.000733 |
| PDF       | 16q22.1  | 0.192697 | 0.000151 | 0.000734 |
| COL3A1    | 2q32.2   | -0.19269 | 0.000151 | 0.000734 |
| CNOT6     | 5q35.3   | 0.192672 | 0.000151 | 0.000735 |
| ZFPM1     | 16q24.2  | 0.19267  | 0.000151 | 0.000735 |
| HABP4     | 9q22.32  | -0.19266 | 0.000151 | 0.000735 |
| HIST1H4D  | 6p22.2   | 0.192652 | 0.000152 | 0.000735 |
| MAEL      | 1q24.1   | -0.19263 | 0.000152 | 0.000736 |
| COQ3      | 6q16.2   | 0.192624 | 0.000152 | 0.000737 |
| FAM163B   | 9q34.2   | -0.1926  | 0.000152 | 0.000738 |
| TADA2A    | 17q12    | 0.192594 | 0.000152 | 0.000738 |
| RIMS2     | 8q22.3   | -0.19259 | 0.000152 | 0.000738 |
| PTTG3P    | 8q13.1   | 0.192578 | 0.000152 | 0.000739 |
| NEK8      | 17q11.2  | 0.192569 | 0.000153 | 0.000739 |
| FPGT      | 1p31.1   | -0.19254 | 0.000153 | 0.00074  |
| BCAS2     | 1p13.2   | -0.19253 | 0.000153 | 0.000741 |
| NUP155    | 5p13.2   | 0.192524 | 0.000153 | 0.000741 |
| ZFP37     | 9q32     | -0.19252 | 0.000153 | 0.000741 |
| CORO7     | 16p13.3  | 0.192507 | 0.000153 | 0.000742 |
| DIRC1     | 2q32.2   | -0.1925  | 0.000153 | 0.000742 |
| VLDLR     | 9p24.2   | -0.19249 | 0.000153 | 0.000742 |
| PKIA      | 8q21.13  | -0.19248 | 0.000154 | 0.000743 |
| ERO1B     | 1q42.3   | -0.19243 | 0.000154 | 0.000745 |
| PLOD2     | 3q24     | -0.19243 | 0.000154 | 0.000745 |
| PDPN      | 1p36.21  | -0.19242 | 0.000154 | 0.000746 |
| GSTCD     | 4q24     | 0.192414 | 0.000154 | 0.000746 |
| PSMD10    | Xq22.3   | -0.19241 | 0.000155 | 0.000746 |
| RNF14     | 5q31.3   | -0.19238 | 0.000155 | 0.000748 |
| SLC1A2    | 11p13    | -0.19237 | 0.000155 | 0.000748 |
| TSC2      | 16p13.3  | 0.192358 | 0.000155 | 0.000749 |
| BTK       | Xq22.1   | -0.19235 | 0.000155 | 0.000749 |
| ANKRD55   | 5q11.2   | -0.19235 | 0.000155 | 0.000749 |
| ADAR      | 1q21.3   | 0.192334 | 0.000155 | 0.00075  |
| SNRK      | 3p22.1   | -0.19232 | 0.000156 | 0.00075  |
| FKBP15    | 9q32     | 0.192316 | 0.000156 | 0.00075  |
| LPCAT4    | 15q14    | 0.192312 | 0.000156 | 0.00075  |
| DHODH     | 16q22.2  | 0.192287 | 0.000156 | 0.000752 |
| BCL2      | 18q21.33 | -0.19228 | 0.000156 | 0.000752 |
| SOX7      | 8p23.1   | -0.19224 | 0.000157 | 0.000754 |
| RTN1      | 14q23.1  | -0.19219 | 0.000157 | 0.000757 |
| SMARCAL1  | 2q35     | -0.19218 | 0.000157 | 0.000758 |
| SGCG      | 13q12.12 | -0.19217 | 0.000158 | 0.000758 |
| LINC00623 | 1p11.2   | -0.19212 | 0.000158 | 0.000761 |
| CHURC1    | 14q23.3  | -0.1921  | 0.000158 | 0.000762 |
| FAM216B   | 13q14.11 | -0.1921  | 0.000158 | 0.000762 |
| PERP      | 6q23.3   | -0.19208 | 0.000159 | 0.000763 |
| FA2H      | 16q23.1  | 0.192064 | 0.000159 | 0.000764 |
| AKAP10    | 17p11.2  | -0.19202 | 0.000159 | 0.000766 |
| FBXW9     | 19p13.13 | 0.192006 | 0.00016  | 0.000767 |
| MATK      | 19p13.3  | -0.19199 | 0.00016  | 0.000767 |
| PGBD2     | 1q44     | 0.191993 | 0.00016  | 0.000767 |
| CD5       | 11q12.2  | -0.19198 | 0.00016  | 0.000768 |
| ACYP1     | 14q24.3  | 0.191952 | 0.00016  | 0.000769 |

|           |              |          |          |          |
|-----------|--------------|----------|----------|----------|
| KRT23     | 17q21.2      | -0.1919  | 0.000161 | 0.000772 |
| THRSP     | 11q14.1      | -0.19189 | 0.000161 | 0.000773 |
| SLC25A26  | 3p14.1       | -0.19186 | 0.000161 | 0.000774 |
| EMC3      | 3p25.3       | -0.19183 | 0.000162 | 0.000776 |
| NXN       | 17p13.3      | -0.1918  | 0.000162 | 0.000778 |
| ATG4C     | 1p31.3       | -0.19177 | 0.000163 | 0.00078  |
| CEP135    | 4q12         | 0.191763 | 0.000163 | 0.00078  |
| GAS7      | 17p13.1      | -0.19176 | 0.000163 | 0.00078  |
| GK5       | 3q23         | 0.191726 | 0.000163 | 0.000782 |
| FCGR1CP   | 1q21.1       | -0.19172 | 0.000163 | 0.000782 |
| JPH2      | 20q13.12     | -0.19171 | 0.000164 | 0.000783 |
| ABCD2     | 12q12        | -0.1917  | 0.000164 | 0.000783 |
| HNRNPA3   | 2q31.2       | 0.191694 | 0.000164 | 0.000783 |
| CDC14A    | 1p21.2       | -0.19165 | 0.000164 | 0.000785 |
| MLLT6     | 17q12        | 0.191584 | 0.000165 | 0.00079  |
| YPEL4     | 11q12.1      | -0.19158 | 0.000165 | 0.00079  |
| CNTRL     | 9q33.2       | 0.191543 | 0.000166 | 0.000792 |
| FUT7      | 9q34.3       | -0.1915  | 0.000166 | 0.000794 |
| PTPRZ1    | 7q31.32      | -0.19148 | 0.000167 | 0.000796 |
| MATN2     | 8q22.1-q22.2 | -0.19143 | 0.000167 | 0.000798 |
| LTA       | 6p21.33      | -0.19142 | 0.000167 | 0.000799 |
| SPATA5    | 4q28.1       | 0.191413 | 0.000167 | 0.000799 |
| SMTNL2    | 17p13.2      | -0.1914  | 0.000168 | 0.0008   |
| CPLX2     | 5q35.2       | -0.19135 | 0.000168 | 0.000803 |
| KLHDC4    | 16q24.2      | 0.191341 | 0.000168 | 0.000803 |
| AQP7P3    | 9q21.11      | -0.19125 | 0.00017  | 0.000809 |
| CPM       | 12q15        | -0.19122 | 0.00017  | 0.000811 |
| IL10      | 1q32.1       | -0.19121 | 0.00017  | 0.000811 |
| SCRN3     | 2q31.1       | -0.19121 | 0.00017  | 0.000811 |
| CCNA1     | 13q13.3      | -0.1912  | 0.00017  | 0.000812 |
| MYORG     | 9p13.3       | 0.191168 | 0.000171 | 0.000813 |
| LAIR1     | 19q13.42     | -0.19114 | 0.000171 | 0.000815 |
| HFM1      | 1p22.2       | -0.19113 | 0.000171 | 0.000815 |
| C10ORF25  | 10q11.21     | -0.19112 | 0.000171 | 0.000816 |
| RGS17     | 6q25.2       | -0.19111 | 0.000172 | 0.000817 |
| TLR2      | 4q31.3       | -0.19109 | 0.000172 | 0.000817 |
| PRPF31    | 19q13.42     | 0.191078 | 0.000172 | 0.000818 |
| EPCAM     | 2p21         | -0.19107 | 0.000172 | 0.000818 |
| KLF10     | 8q22.3       | -0.19104 | 0.000172 | 0.00082  |
| TNFRSF19  | 13q12.12     | -0.19102 | 0.000173 | 0.000821 |
| PTGDS     | 9q34.3       | -0.19102 | 0.000173 | 0.000821 |
| GIMAP1    | 7q36.1       | -0.19093 | 0.000174 | 0.000826 |
| DDX46     | 5q31.1       | 0.190928 | 0.000174 | 0.000827 |
| HDGFL3    | 15q25.2      | -0.19093 | 0.000174 | 0.000827 |
| MCMBP     | 10q26.11     | 0.190862 | 0.000175 | 0.000831 |
| ST6GAL2   | 2q12.3       | -0.19084 | 0.000175 | 0.000832 |
| DCUN1D2   | 13q34        | 0.19084  | 0.000175 | 0.000832 |
| HOMER3    | 19p13.11     | -0.19076 | 0.000176 | 0.000837 |
| DKK2      | 4q25         | -0.19074 | 0.000177 | 0.000838 |
| CROCCP3   | 1p36.13      | 0.190682 | 0.000177 | 0.000842 |
| NCK2      | 2q12.2       | -0.19066 | 0.000178 | 0.000843 |
| C2CD4D    | 1q21.3       | 0.190647 | 0.000178 | 0.000844 |
| GLB1      | 3p22.3       | -0.19064 | 0.000178 | 0.000844 |
| NIPSNAP3B | 9q31.1       | -0.19063 | 0.000178 | 0.000844 |
| MORC4     | Xq22.3       | 0.190593 | 0.000179 | 0.000847 |
| SNORA6    | 3p22.1       | 0.190565 | 0.000179 | 0.000848 |
| SMIM6     | 17q25.1      | -0.19055 | 0.000179 | 0.000849 |
| MEF2A     | 15q26.3      | -0.19055 | 0.000179 | 0.000849 |



|           |                 |          |          |          |
|-----------|-----------------|----------|----------|----------|
| UGT8      | 4q26            | 0.190529 | 0.00018  | 0.00085  |
| EAF2      | 3q13.33         | -0.19045 | 0.000181 | 0.000855 |
| EDA       | Xq13.1          | -0.19044 | 0.000181 | 0.000856 |
| ACP5      | 19p13.2         | -0.19044 | 0.000181 | 0.000856 |
| LOC653653 | 17q23.1         | -0.19035 | 0.000182 | 0.000862 |
| MS4A7     | 11q12.2         | -0.19034 | 0.000182 | 0.000862 |
| ZNF271P   | 18q12.2         | -0.19031 | 0.000183 | 0.000864 |
| NBR1      | 17q21.31        | -0.19031 | 0.000183 | 0.000864 |
| KCNB1     | 20q13.13        | -0.1903  | 0.000183 | 0.000864 |
| PCDHA4    | 5q31.3          | -0.1903  | 0.000183 | 0.000864 |
| COMMD2    | 3q25.1          | -0.1903  | 0.000183 | 0.000864 |
| C11ORF42  | 11p15.4         | 0.190299 | 0.000183 | 0.000864 |
| CYP24A1   | 20q13.2         | -0.19029 | 0.000183 | 0.000864 |
| MNDA      | 1q23.1          | -0.19027 | 0.000183 | 0.000866 |
| NKIRAS1   | 3p24.2          | -0.19025 | 0.000184 | 0.000867 |
| RARA      | 17q21.2         | -0.19022 | 0.000184 | 0.000869 |
| ZNF321P   | 19q13.41        | 0.190208 | 0.000184 | 0.000869 |
| ATP6V0A4  | 7q34            | -0.19014 | 0.000185 | 0.000873 |
| PBX4      | 19p13.11        | 0.190143 | 0.000185 | 0.000873 |
| ADAP1     | 7p22.3          | 0.190086 | 0.000186 | 0.000877 |
| KIAA1210  | Xq24            | -0.19008 | 0.000186 | 0.000877 |
| CYGB      | 17q25.1         | -0.19007 | 0.000186 | 0.000877 |
| FAM218A   | 4q32.3          | -0.19007 | 0.000186 | 0.000877 |
| PCOLCE    | 7q22.1          | -0.19003 | 0.000187 | 0.00088  |
| KCNK9     | 8q24.3          | -0.19002 | 0.000187 | 0.000881 |
| C7ORF31   | 7p15.3          | -0.18996 | 0.000188 | 0.000884 |
| CATSPER1  | 11q13.1         | -0.18996 | 0.000188 | 0.000884 |
| CPEB4     | 5q35.2          | -0.18994 | 0.000188 | 0.000885 |
| LRRC59    | 17q21.33        | 0.189921 | 0.000189 | 0.000887 |
| ZNF835    | 19q13.43        | -0.18988 | 0.000189 | 0.000889 |
| NOL8      | 9q22.31         | 0.189872 | 0.000189 | 0.00089  |
| RASSF4    | 10q11.21        | -0.18987 | 0.000189 | 0.00089  |
| MEX3D     | 19p13.3         | 0.189852 | 0.00019  | 0.000891 |
| HMCES     | 3q21.3          | 0.189838 | 0.00019  | 0.000891 |
| KLF8      | Xp11.21         | -0.18984 | 0.00019  | 0.000891 |
| SLC7A11   | 4q28.3          | 0.189829 | 0.00019  | 0.000892 |
| CYP26A1   | 10q23.33        | -0.18981 | 0.00019  | 0.000892 |
| RPSAP52   | 12q14.3         | -0.18981 | 0.00019  | 0.000892 |
| PGD       | 1p36.22         | 0.189803 | 0.00019  | 0.000893 |
| CEL       | 9q34.13         | -0.18977 | 0.000191 | 0.000895 |
| TTLL13P   | 15q26.1         | 0.189759 | 0.000191 | 0.000895 |
| GATA3     | 10p14           | -0.18974 | 0.000191 | 0.000897 |
| MTMR2     | 11q21           | -0.18972 | 0.000192 | 0.000898 |
| TMEM43    | 3p25.1          | -0.1897  | 0.000192 | 0.000899 |
| CAVIN3    | 11p15.4         | -0.1897  | 0.000192 | 0.000899 |
| CENPS     | 1p36.22         | 0.18967  | 0.000192 | 0.000901 |
| AP4B1     | 1p13.2          | 0.189622 | 0.000193 | 0.000904 |
| SLC24A4   | 14q32.12        | -0.18961 | 0.000193 | 0.000905 |
| SNORA59B  | 17p11.2         | 0.189602 | 0.000193 | 0.000905 |
| OPRK1     | 8q11.23         | -0.18959 | 0.000194 | 0.000906 |
| PIEZO2    | 18p11.22-p11.21 | -0.18958 | 0.000194 | 0.000906 |
| NRARP     | 9q34.3          | 0.189508 | 0.000195 | 0.000911 |
| SHISA7    | 19q13.42        | 0.1895   | 0.000195 | 0.000912 |
| CD79B     | 17q23.3         | -0.18948 | 0.000195 | 0.000913 |
| SH3BP1    | 22q13.1         | 0.18948  | 0.000195 | 0.000913 |
| WDR78     | 1p31.3          | -0.18944 | 0.000196 | 0.000915 |
| PSD       | 10q24.32        | -0.18943 | 0.000196 | 0.000916 |
| SHISA6    | 17p12           | -0.1894  | 0.000197 | 0.000918 |

|              |                    |          |          |          |
|--------------|--------------------|----------|----------|----------|
| CGA          | 6q14.3             | -0.18932 | 0.000198 | 0.000923 |
| ARHGEF2      | 1q22               | 0.189283 | 0.000198 | 0.000926 |
| UBAP1        | 9p13.3             | -0.18919 | 0.0002   | 0.000932 |
| NCBP1        | 9q22.33            | 0.189168 | 0.0002   | 0.000934 |
| MS4A4A       | 11q12.2            | -0.18914 | 0.000201 | 0.000936 |
| TMUB2        | 17q21.31           | -0.18909 | 0.000201 | 0.000939 |
| TXNDC12      | 1p32.3             | -0.18909 | 0.000201 | 0.000939 |
| SPESP1       | 15q23              | -0.18908 | 0.000202 | 0.00094  |
| CZIB         | 1p32.3             | -0.18907 | 0.000202 | 0.00094  |
| CPNE8        | 12q12              | -0.18906 | 0.000202 | 0.000941 |
| ZNF570       | 19q13.12           | -0.18906 | 0.000202 | 0.000941 |
| MUL1         | 1p36.12            | -0.18905 | 0.000202 | 0.000941 |
| SNRPE        | 1q32.1             | 0.189008 | 0.000203 | 0.000944 |
| SOST         | 17q21.31           | -0.18898 | 0.000203 | 0.000946 |
| ARHGAP18     | 6q22.33            | -0.18895 | 0.000204 | 0.000948 |
| LOC145783    | 15q21.3            | -0.18893 | 0.000204 | 0.000949 |
| LDLR         | 19p13.2            | 0.188863 | 0.000205 | 0.000954 |
| C17ORF80     | 17q25.1            | -0.18885 | 0.000205 | 0.000955 |
| SNX4         | 3q21.2             | -0.18885 | 0.000205 | 0.000955 |
| MTA1         | 14q32.33           | 0.188834 | 0.000206 | 0.000955 |
| SEC16B       | 1q25.2             | 0.18877  | 0.000207 | 0.00096  |
| LILRA4       | 19q13.42           | -0.18876 | 0.000207 | 0.000961 |
| CCDC183-AS1  | 9q34.3             | 0.188744 | 0.000207 | 0.000962 |
| HIST1H2BF    | 6p22.2             | 0.188727 | 0.000207 | 0.000963 |
| ROM1         | 11q12.3            | -0.18871 | 0.000208 | 0.000964 |
| GRIN2A       | 16p13.2            | -0.18868 | 0.000208 | 0.000966 |
| CERS2        | 1q21.3             | 0.188676 | 0.000208 | 0.000966 |
| MYLIP        | 6p22.3             | -0.18864 | 0.000209 | 0.000968 |
| USP10        | 16q24.1            | 0.188634 | 0.000209 | 0.000969 |
| FKBPL        | 6p21.32            | 0.188629 | 0.000209 | 0.000969 |
| TMED7-TICAM2 | 5q22.3             | -0.18863 | 0.000209 | 0.000969 |
| ARMCX5       | Xq22.1             | -0.18861 | 0.000209 | 0.00097  |
| IFNAR2       | 21q22.11           | -0.18861 | 0.000209 | 0.00097  |
| FAM228A      | 2p23.3             | -0.18859 | 0.00021  | 0.000971 |
| SH3RF2       | 5q32               | 0.188588 | 0.00021  | 0.000971 |
| ADGRB2       | 1p35.2             | -0.18858 | 0.00021  | 0.000971 |
| IRF2BPL      | 14q24.3            | -0.18853 | 0.000211 | 0.000975 |
| SLC25A19     | 17q25.1            | 0.188503 | 0.000211 | 0.000976 |
| MST1P2       | 1p36.13            | 0.188499 | 0.000211 | 0.000976 |
| TMEM273      | 10q11.23           | -0.1885  | 0.000211 | 0.000976 |
| HOXD8        | 2q31.1             | -0.1885  | 0.000211 | 0.000976 |
| CHRM2        | 7q33               | -0.18847 | 0.000212 | 0.000978 |
| IL22RA2      | 6q23.3             | -0.18847 | 0.000212 | 0.000978 |
| VGLL4        | 3p25.3-p25.2       | -0.18843 | 0.000212 | 0.000981 |
| GIMAP8       | 7q36.1             | -0.18838 | 0.000213 | 0.000985 |
| LUZP6        | 7q33               | -0.18837 | 0.000213 | 0.000985 |
| HAS2-AS1     | 8q24.13            | -0.18836 | 0.000213 | 0.000985 |
| LINC02716    | 11p11.2            | -0.1883  | 0.000214 | 0.00099  |
| CSF2RA       | Xp22.33 and Yp11.2 | -0.18829 | 0.000215 | 0.000991 |
| RNF8         | 6p21.2             | 0.188286 | 0.000215 | 0.000991 |
| DGKH         | 13q14.11           | 0.188233 | 0.000216 | 0.000995 |
| CCL24        | 7q11.23            | -0.18822 | 0.000216 | 0.000995 |
| LRRC37A4P    | 17q21.31           | 0.188202 | 0.000216 | 0.000997 |
| PGM5-AS1     | 9q21.11            | -0.18817 | 0.000217 | 0.000999 |
| ARF4         | 3p14.3             | -0.18815 | 0.000217 | 0.001    |
| CA14         | 1q21.2             | 0.188142 | 0.000217 | 0.001001 |
| NRP1         | 10p11.22           | -0.18813 | 0.000217 | 0.001001 |
| PRAF2        | Xp11.23            | -0.18812 | 0.000217 | 0.001002 |

|           |               |          |          |          |
|-----------|---------------|----------|----------|----------|
| LINC01465 | 12q14.1       | -0.18808 | 0.000218 | 0.001005 |
| KAAG1     | 6p22.3        | 0.18807  | 0.000218 | 0.001005 |
| KIDINS220 | 2p25.1        | -0.18805 | 0.000219 | 0.001007 |
| HIST1H2BL | 6p22.1        | 0.18803  | 0.000219 | 0.001008 |
| SCRIB     | 8q24.3        | 0.188009 | 0.000219 | 0.00101  |
| TAF15     | 17q12         | 0.187998 | 0.00022  | 0.00101  |
| GAS2      | 11p14.3       | -0.18798 | 0.00022  | 0.001011 |
| SGK1      | 6q23.2        | -0.18798 | 0.00022  | 0.001011 |
| RHEX      | 1q32.1        | -0.18796 | 0.00022  | 0.001012 |
| ELMO2     | 20q13.12      | -0.18796 | 0.00022  | 0.001012 |
| FAM181B   | 11q14.1       | -0.18795 | 0.00022  | 0.001013 |
| MTX1      | 1q22          | 0.187947 | 0.00022  | 0.001013 |
| ARHGAP24  | 4q21.23-q21.3 | -0.18793 | 0.000221 | 0.001014 |
| PCDH19    | Xq22.1        | -0.18792 | 0.000221 | 0.001015 |
| SLC1A3    | 5p13.2        | -0.18789 | 0.000221 | 0.001017 |
| TMEM60    | 7q11.23       | -0.18784 | 0.000222 | 0.00102  |
| AMDHD1    | 12q23.1       | -0.18781 | 0.000223 | 0.001023 |
| TIMM50    | 19q13.2       | 0.187806 | 0.000223 | 0.001023 |
| IFT122    | 3q21.3-q22.1  | 0.187806 | 0.000223 | 0.001023 |
| ATP8A2    | 13q12.13      | -0.18775 | 0.000224 | 0.001027 |
| CYTH2     | 19q13.33      | 0.187747 | 0.000224 | 0.001027 |
| TVP23C    | 17p12         | -0.18763 | 0.000226 | 0.001036 |
|           | 1-Mar 1q41    | 0.187625 | 0.000226 | 0.001036 |
| NUFIP2    | 17q11.2       | 0.187608 | 0.000226 | 0.001037 |
| EMX1      | 2p13.2        | 0.187588 | 0.000227 | 0.001039 |
| CD180     | 5q12.3        | -0.18758 | 0.000227 | 0.00104  |
| FLJ16779  | 20q13.33      | -0.18756 | 0.000227 | 0.00104  |
| UTRN      | 6q24.2        | -0.18755 | 0.000228 | 0.001041 |
| ACTR3     | 2q14.1        | -0.18753 | 0.000228 | 0.001042 |
| MTOR      | 1p36.22       | 0.187514 | 0.000228 | 0.001044 |
| CCDC15    | 11q24.2       | 0.18746  | 0.000229 | 0.001048 |
| LINC00472 | 6q13          | -0.18745 | 0.000229 | 0.001049 |
| PTRH1     | 9q34.11       | 0.187432 | 0.00023  | 0.00105  |
| FAM161B   | 14q24.3       | -0.18742 | 0.00023  | 0.001051 |
| ZNF461    | 19q13.12      | -0.18741 | 0.00023  | 0.001051 |
| NRG2      | 5q31.2        | -0.1874  | 0.00023  | 0.001051 |
| ARL2      | 11q13.1       | -0.18737 | 0.000231 | 0.001053 |
| PDK4      | 7q21.3        | -0.18737 | 0.000231 | 0.001053 |
| GABRA3    | Xq28          | -0.18737 | 0.000231 | 0.001054 |
| C3AR1     | 12p13.31      | -0.18735 | 0.000231 | 0.001055 |
| DMTF1     | 7q21.12       | 0.187319 | 0.000232 | 0.001057 |
| JCAD      | 10p11.23      | -0.18729 | 0.000232 | 0.00106  |
| LIX1      | 5q15          | -0.18726 | 0.000233 | 0.001062 |
| ZNF215    | 11p15.4       | 0.187253 | 0.000233 | 0.001062 |
| TRAPPC3   | 1p34.3        | -0.18724 | 0.000233 | 0.001063 |
| GPIHBP1   | 8q24.3        | -0.18724 | 0.000233 | 0.001063 |
| COL16A1   | 1p35.2        | -0.18724 | 0.000233 | 0.001063 |
| ZNF574    | 19q13.2       | 0.187154 | 0.000235 | 0.001069 |
| BAZ1B     | 7q11.23       | 0.18715  | 0.000235 | 0.001069 |
| RFESD     | 5q15          | -0.18713 | 0.000235 | 0.001071 |
| KCNK12    | 2p16.3        | -0.18713 | 0.000235 | 0.001071 |
| TCTEX1D4  | 1p34.1        | 0.187123 | 0.000235 | 0.001071 |
| SLC7A3    | Xq13.1        | -0.18709 | 0.000236 | 0.001073 |
| HCFC1R1   | 16p13.3       | -0.18708 | 0.000236 | 0.001074 |
| ARTN      | 1p34.1        | 0.187053 | 0.000237 | 0.001076 |
| PLCB1     | 20p12.3       | -0.18704 | 0.000237 | 0.001077 |
| LTC4S     | 5q35.3        | -0.18699 | 0.000238 | 0.00108  |
| HIRIP3    | 16p11.2       | 0.186955 | 0.000238 | 0.001084 |

|           |               |          |          |          |
|-----------|---------------|----------|----------|----------|
| RCSD1     | 1q24.2        | -0.18694 | 0.000239 | 0.001085 |
| EPS8L2    | 11p15.5       | 0.186909 | 0.000239 | 0.001087 |
| FGGY      | 1p32.1        | -0.18691 | 0.000239 | 0.001087 |
| GIT1      | 17q11.2       | 0.186903 | 0.000239 | 0.001087 |
| ATP6V1G1  | 9q32          | -0.18687 | 0.00024  | 0.001089 |
| TMEM250   | 9q34.3        | 0.186856 | 0.00024  | 0.001091 |
| CITED2    | 6q24.1        | -0.18685 | 0.00024  | 0.001091 |
| PKP2      | 12p11.21      | 0.186813 | 0.000241 | 0.001094 |
| LRSAM1    | 9q33.3-q34.11 | 0.18681  | 0.000241 | 0.001094 |
| LMO2      | 11p13         | -0.18681 | 0.000241 | 0.001094 |
| CCR1      | 3p21.31       | -0.1868  | 0.000241 | 0.001094 |
| THRB      | 3p24.2        | -0.18678 | 0.000242 | 0.001095 |
| HLA-DMB   | 6p21.32       | -0.18678 | 0.000242 | 0.001095 |
| TLL2      | 10q24.1       | -0.18676 | 0.000242 | 0.001097 |
| ZNF471    | 19q13.43      | -0.18675 | 0.000242 | 0.001098 |
| METTL26   | 16p13.3       | 0.186736 | 0.000242 | 0.001098 |
| CXORF21   | Xp21.2        | -0.18672 | 0.000243 | 0.001099 |
| CCDC130   | 19p13.13      | 0.186716 | 0.000243 | 0.0011   |
| CLEC10A   | 17p13.1       | -0.1867  | 0.000243 | 0.001101 |
| SLC19A3   | 2q36.3        | -0.18669 | 0.000243 | 0.001101 |
| MCFD2     | 2p21          | -0.18667 | 0.000244 | 0.001103 |
| CYP27C1   | 2q14.3        | -0.18666 | 0.000244 | 0.001103 |
| SLC7A6    | 16q22.1       | 0.186589 | 0.000245 | 0.001109 |
| FAM122B   | Xq26.3        | 0.186586 | 0.000245 | 0.001109 |
| DET1      | 15q26.1       | -0.18655 | 0.000246 | 0.001112 |
| RBP5      | 12p13.31      | -0.18655 | 0.000246 | 0.001112 |
| TRIM21    | 11p15.4       | -0.18653 | 0.000246 | 0.001114 |
| TNFAIP8L1 | 19p13.3       | 0.186492 | 0.000247 | 0.001116 |
| TTC30B    | 2q31.2        | -0.18649 | 0.000247 | 0.001117 |
|           | 7-Mar 2q24.2  | -0.18646 | 0.000248 | 0.001119 |
| PIFO      | 1p13.2        | -0.18645 | 0.000248 | 0.001119 |
| ERGIC2    | 12p11.22      | -0.18644 | 0.000248 | 0.00112  |
| USP24     | 1p32.3        | 0.186429 | 0.000248 | 0.001121 |
| LIMD2     | 17q23.3       | -0.18642 | 0.000249 | 0.001122 |
| MAGEA8    | Xq28          | 0.186401 | 0.000249 | 0.001123 |
| LOC143666 | 11p15.5       | 0.186381 | 0.000249 | 0.001124 |
| SUMO1     | 2q33.1        | -0.18638 | 0.000249 | 0.001124 |
| VIP       | 6q25.2        | -0.18637 | 0.000249 | 0.001124 |
| THAP8     | 19q13.12      | -0.18637 | 0.000249 | 0.001124 |
| GSC       | 14q32.13      | -0.18636 | 0.00025  | 0.001125 |
| EYA4      | 6q23.2        | -0.18635 | 0.00025  | 0.001126 |
| SLIT3     | 5q34-q35.1    | -0.18635 | 0.00025  | 0.001126 |
| PCDHB14   | 5q31.3        | -0.18634 | 0.00025  | 0.001126 |
| DIS3L2    | 2q37.1        | 0.186319 | 0.00025  | 0.001128 |
| SCARF2    | 22q11.21      | -0.18629 | 0.000251 | 0.00113  |
| NABP1     | 2q32.3        | -0.18629 | 0.000251 | 0.00113  |
| GCNA      | Xq13.1        | 0.186175 | 0.000253 | 0.00114  |
| FTH1P3    | 2p23.3        | -0.18617 | 0.000253 | 0.00114  |
| ELF1      | 13q14.11      | -0.18612 | 0.000254 | 0.001144 |
| RBM12B    | 8q22.1        | 0.186038 | 0.000256 | 0.001151 |
| ZDHHC22   | 14q24.3       | -0.18601 | 0.000257 | 0.001153 |
| TMEM251   | 14q32.12      | -0.186   | 0.000257 | 0.001154 |
| PDE6G     | 17q25.3       | -0.18598 | 0.000257 | 0.001156 |
| ABI3      | 17q21.32      | -0.18597 | 0.000257 | 0.001156 |
| CHRD12    | 11q13.4       | -0.18595 | 0.000258 | 0.001157 |
| TUBB4A    | 19p13.3       | 0.185944 | 0.000258 | 0.001158 |
| CROCC     | 1p36.13       | 0.185933 | 0.000258 | 0.001159 |
| RAB42     | 1p35.3        | -0.1859  | 0.000259 | 0.001162 |

|               |                |          |          |          |
|---------------|----------------|----------|----------|----------|
| IDUA          | 4p16.3         | 0.185874 | 0.000259 | 0.001164 |
| FAM223B       | Xq28           | 0.185809 | 0.000261 | 0.001169 |
| GLIDR         | 9p12           | -0.18579 | 0.000261 | 0.00117  |
| DNAJC25-GNG10 | 9q31.3         | 0.185773 | 0.000261 | 0.001172 |
| TPTEP2        | 22q13.1        | 0.185742 | 0.000262 | 0.001174 |
| CELSR3        | 3p21.31        | 0.18569  | 0.000263 | 0.001179 |
| HIST1H1E      | 6p22.2         | 0.185665 | 0.000264 | 0.001181 |
| EOGT          | 3p14.1         | -0.18564 | 0.000264 | 0.001183 |
| CNP           | 17q21.2        | -0.18563 | 0.000264 | 0.001184 |
| PPP1R1A       | 12q13.2        | -0.18562 | 0.000265 | 0.001184 |
| GABRR1        | 6q15           | -0.18562 | 0.000265 | 0.001184 |
| AFP           | 4q13.3         | -0.18559 | 0.000265 | 0.001186 |
| PPP1R13B      | 14q32.33       | 0.185559 | 0.000266 | 0.001189 |
| R3HDM1        | 2q21.3         | 0.185516 | 0.000267 | 0.001193 |
| ARHGAP31      | 3q13.32-q13.33 | -0.18546 | 0.000268 | 0.001198 |
| PLEKHG7       | 12q22          | -0.18546 | 0.000268 | 0.001198 |
| HLX           | 1q41           | -0.18545 | 0.000268 | 0.001198 |
| EDEM3         | 1q25.3         | 0.185444 | 0.000268 | 0.001199 |
| NETO1         | 18q22.3        | -0.18544 | 0.000268 | 0.001199 |
| TMEFF1        | 9q31.1         | -0.18543 | 0.000268 | 0.001199 |
| ENPP6         | 4q35.1         | -0.18542 | 0.000269 | 0.0012   |
| SLED1         | 4q35.1         | 0.18541  | 0.000269 | 0.001201 |
| TEN1          | 17q25.1        | -0.1854  | 0.000269 | 0.001201 |
| TBC1D3B       | 17q12          | 0.185402 | 0.000269 | 0.001201 |
| PDE7B         | 6q23.3         | -0.18539 | 0.000269 | 0.001201 |
| SMC3          | 10q25.2        | 0.18539  | 0.000269 | 0.001201 |
| SLFN12        | 17q12          | -0.18538 | 0.000269 | 0.001202 |
| PCMTD2        | 20q13.33       | -0.18535 | 0.00027  | 0.001205 |
| MIER2         | 19p13.3        | 0.185339 | 0.00027  | 0.001205 |
| HIST1H2AH     | 6p22.1         | 0.185321 | 0.000271 | 0.001207 |
| CCDC71        | 3p21.31        | -0.18529 | 0.000271 | 0.00121  |
| POT1          | 7q31.33        | -0.18528 | 0.000272 | 0.00121  |
| STK11IP       | 2q35           | 0.185271 | 0.000272 | 0.001211 |
| MBD5          | 2q23.1         | -0.18527 | 0.000272 | 0.001211 |
| DRC1          | 2p23.3         | -0.18523 | 0.000273 | 0.001214 |
| RNASE3        | 14q11.2        | -0.18522 | 0.000273 | 0.001215 |
| PLK5          | 19p13.3        | 0.185217 | 0.000273 | 0.001215 |
| SLC2A14       | 12p13.31       | -0.1852  | 0.000273 | 0.001216 |
| SIX1          | 14q23.1        | -0.1852  | 0.000273 | 0.001216 |
| SERPINA10     | 14q32.13       | -0.18519 | 0.000274 | 0.001216 |
| FRAT2         | 10q24.1        | 0.185174 | 0.000274 | 0.001218 |
| HIST1H1B      | 6p22.1         | 0.185133 | 0.000275 | 0.001221 |
| ZNF699        | 19p13.2        | -0.18512 | 0.000275 | 0.001222 |
| ANKRD13D      | 11q13.2        | 0.185091 | 0.000276 | 0.001225 |
| PRDX5         | 11q13.1        | -0.18508 | 0.000276 | 0.001226 |
| CCDC50        | 3q28           | -0.18507 | 0.000276 | 0.001226 |
| SELL          | 1q24.2         | -0.18505 | 0.000277 | 0.001228 |
| CCDC170       | 6q25.1         | -0.18502 | 0.000277 | 0.00123  |
| FYN           | 6q21           | -0.18501 | 0.000277 | 0.001231 |
| ZBTB10        | 8q21.13        | -0.18501 | 0.000277 | 0.001231 |
| WNT5B         | 12p13.33       | -0.185   | 0.000278 | 0.001231 |
| SEC11C        | 18q21.32       | -0.18495 | 0.000279 | 0.001236 |
| FOLR2         | 11q13.4        | -0.18493 | 0.000279 | 0.001238 |
| HDAC5         | 17q21.31       | -0.1849  | 0.00028  | 0.00124  |
| GLI3          | 7p14.1         | -0.18483 | 0.000281 | 0.001247 |
| LSP1P4        | 2p11.2         | -0.18483 | 0.000281 | 0.001247 |
| PUS10         | 2p16.1-p15     | -0.18482 | 0.000281 | 0.001247 |
| TMED1         | 19p13.2        | -0.18479 | 0.000282 | 0.00125  |

|           |               |          |          |          |
|-----------|---------------|----------|----------|----------|
| FCGR2C    | 1q23.3        | -0.18476 | 0.000283 | 0.001252 |
| CCDC106   | 19q13.42      | -0.18474 | 0.000283 | 0.001254 |
| LAMB2     | 3p21.31       | -0.1847  | 0.000284 | 0.001258 |
| MFSD14C   | 9q22.33       | 0.184653 | 0.000285 | 0.001262 |
| MIR22HG   | 17p13.3       | -0.18465 | 0.000285 | 0.001262 |
| NUTM2G    | 9q22.33       | 0.184555 | 0.000287 | 0.001271 |
| ATP6V1C1  | 8q22.3        | -0.18453 | 0.000288 | 0.001273 |
| SAMSN1    | 21q11.2       | -0.18452 | 0.000288 | 0.001273 |
| MAGEE2    | Xq13.3        | -0.18452 | 0.000288 | 0.001273 |
| FOXF1     | 16q24.1       | -0.18452 | 0.000288 | 0.001273 |
| FAM200B   | 4p15.32       | -0.18452 | 0.000288 | 0.001273 |
| C8G       | 9q34.3        | 0.18446  | 0.000289 | 0.001279 |
| HLA-DRB1  | 6p21.32       | -0.18445 | 0.00029  | 0.00128  |
| LRRC8C    | 1p22.2        | -0.18443 | 0.00029  | 0.001281 |
| PLEKHM1P1 | 17q24.1       | 0.184422 | 0.00029  | 0.001282 |
| RRNAD1    | 1q23.1        | 0.184415 | 0.00029  | 0.001282 |
| DCDC2B    | 1p35.2        | 0.184412 | 0.000291 | 0.001282 |
| SUMF1     | 3p26.1        | -0.18441 | 0.000291 | 0.001282 |
| RINL      | 19q13.2       | -0.18431 | 0.000293 | 0.001292 |
| EXD2      | 14q24.1       | -0.1843  | 0.000293 | 0.001292 |
| LPGAT1    | 1q32.3        | 0.184295 | 0.000293 | 0.001293 |
| POLR3K    | 16p13.3       | 0.184271 | 0.000294 | 0.001295 |
| ADCYAP1   | 18p11.32      | -0.18426 | 0.000294 | 0.001296 |
| FGF18     | 5q35.1        | -0.18424 | 0.000294 | 0.001298 |
| MNX1      | 7q36.3        | 0.18423  | 0.000295 | 0.001298 |
| PDZK1P1   | 1q21.2        | 0.18422  | 0.000295 | 0.001299 |
| MT1L      | 16q13         | -0.18421 | 0.000295 | 0.001299 |
| CALHM6    | 6q22.1        | -0.18413 | 0.000297 | 0.001307 |
| TLR10     | 4p14          | -0.18412 | 0.000297 | 0.001308 |
| SCP2      | 1p32.3        | -0.18404 | 0.000299 | 0.001315 |
| CD40      | 20q13.12      | -0.18403 | 0.000299 | 0.001316 |
| SHMT1     | 17p11.2       | 0.184015 | 0.0003   | 0.001318 |
| RBM28     | 7q32.1        | 0.183994 | 0.0003   | 0.00132  |
| ART5      | 11p15.4       | -0.18399 | 0.0003   | 0.00132  |
| TEX14     | 17q22         | -0.18398 | 0.0003   | 0.001321 |
| C19ORF48  | 19q13.33      | 0.183882 | 0.000303 | 0.00133  |
| SNCAIP    | 5q23.2        | -0.18383 | 0.000304 | 0.001335 |
| LRRC25    | 19p13.11      | -0.18383 | 0.000304 | 0.001335 |
| AP1B1     | 22q12.2       | 0.183824 | 0.000304 | 0.001335 |
| PLPPR4    | 1p21.3-p21.2  | -0.18379 | 0.000305 | 0.001339 |
| DHRS13    | 17q11.2       | 0.183767 | 0.000305 | 0.00134  |
| PVRIG     | 7q22.1        | 0.183767 | 0.000305 | 0.00134  |
| CACNA1A   | 19p13.13      | -0.18376 | 0.000306 | 0.001341 |
| SCARA3    | 8p21.1        | -0.18375 | 0.000306 | 0.001342 |
| ARSI      | 5q32          | -0.18374 | 0.000306 | 0.001342 |
| TMEM176B  | 7q36.1        | -0.18372 | 0.000307 | 0.001344 |
| FOXD4L1   | 2q14.1        | 0.183683 | 0.000307 | 0.001347 |
| LCN6      | 9q34.3        | -0.18368 | 0.000307 | 0.001348 |
| POLA1     | Xp22.11-p21.3 | 0.183668 | 0.000308 | 0.001348 |
| CSTA      | 3q21.1        | -0.18367 | 0.000308 | 0.001348 |
| MED31     | 17p13.1       | -0.18366 | 0.000308 | 0.001348 |
| C17ORF100 | 17p13.1       | -0.18366 | 0.000308 | 0.001348 |
| LYL1      | 19p13.13      | -0.18363 | 0.000309 | 0.001351 |
| C5ORF63   | 5q23.2        | 0.183623 | 0.000309 | 0.001352 |
| RARS2     | 6q15          | -0.18361 | 0.000309 | 0.001353 |
| NKAPD1    | 11q23.1       | -0.1836  | 0.000309 | 0.001353 |
| COL11A1   | 1p21.1        | -0.1836  | 0.000309 | 0.001354 |
| RAB3IL1   | 11q12.2-q12.3 | -0.18359 | 0.00031  | 0.001354 |

|           |               |          |          |          |
|-----------|---------------|----------|----------|----------|
| KLRB1     | 12p13.31      | -0.18358 | 0.00031  | 0.001354 |
| UBE2F     | 2q37.3        | -0.18357 | 0.00031  | 0.001356 |
| CPXM1     | 20p13         | -0.18355 | 0.00031  | 0.001357 |
| GABRA2    | 4p12          | -0.18354 | 0.000311 | 0.001358 |
| TMEM19    | 12q21.1       | -0.18351 | 0.000311 | 0.00136  |
| NLRP9     | 19q13.42      | 0.183509 | 0.000311 | 0.001361 |
| FAM117A   | 17q21.33      | -0.18348 | 0.000312 | 0.001363 |
| SCIMP     | 17p13.2       | -0.18348 | 0.000312 | 0.001363 |
| SLITRK5   | 13q31.2       | -0.18345 | 0.000313 | 0.001366 |
| GDPD5     | 11q13.4-q13.5 | -0.18344 | 0.000313 | 0.001366 |
| TPSAB1    | 16p13.3       | -0.18342 | 0.000314 | 0.001368 |
| SUMO1P3   | 1q23.2        | -0.18342 | 0.000314 | 0.001368 |
| SUCNR1    | 3q25.1        | -0.18342 | 0.000314 | 0.001368 |
| ANO5      | 11p14.3       | -0.18341 | 0.000314 | 0.001368 |
| LOC441204 | 7p15.2        | -0.18337 | 0.000315 | 0.001372 |
| TCTEX1D1  | 1p31.3        | -0.18332 | 0.000316 | 0.001377 |
| KCNK13    | 14q32.11      | -0.18332 | 0.000316 | 0.001377 |
| TSLP      | 5q22.1        | -0.18332 | 0.000316 | 0.001377 |
| NSG2      | 5q35.2        | -0.18331 | 0.000316 | 0.001377 |
| TEP1      | 14q11.2       | 0.183302 | 0.000316 | 0.001378 |
| R3HDM2    | 12q13.3       | 0.183293 | 0.000317 | 0.001379 |
| KREMEN2   | 16p13.3       | 0.18328  | 0.000317 | 0.00138  |
| AQP5      | 12q13.12      | 0.183267 | 0.000317 | 0.001381 |
| BRD2      | 6p21.32       | 0.183209 | 0.000319 | 0.001387 |
| PFKFB2    | 1q32.1        | 0.183136 | 0.000321 | 0.001394 |
| HBD       | 11p15.4       | -0.18312 | 0.000321 | 0.001396 |
| SCG3      | 15q21.2       | -0.18305 | 0.000323 | 0.001403 |
| SLCO4A1   | 20q13.33      | 0.183036 | 0.000323 | 0.001404 |
| INKA1     | 3p21.31       | -0.18302 | 0.000323 | 0.001406 |
| APOLD1    | 12p13.1       | -0.18301 | 0.000324 | 0.001406 |
| PERM1     | 1p36.33       | 0.182992 | 0.000324 | 0.001408 |
| ADAM22    | 7q21.12       | -0.18297 | 0.000325 | 0.00141  |
| RAB6C     | 2q21.1        | -0.18296 | 0.000325 | 0.001411 |
| RPS15AP10 | 1p34.1        | 0.182953 | 0.000325 | 0.001411 |
| LILRA1    | 19q13.42      | -0.18294 | 0.000325 | 0.001413 |
| C1ORF162  | 1p13.2        | -0.18291 | 0.000326 | 0.001415 |
| TPSB2     | 16p13.3       | -0.1829  | 0.000326 | 0.001416 |
| KANK2     | 19p13.2       | -0.1829  | 0.000326 | 0.001416 |
| MRPL45    | 17q12         | -0.18288 | 0.000327 | 0.001418 |
| DNAH2     | 17p13.1       | 0.182854 | 0.000328 | 0.00142  |
| CDH10     | 5p14.2-p14.1  | -0.18284 | 0.000328 | 0.001422 |
| SNHG9     | 16p13.3       | 0.182816 | 0.000329 | 0.001424 |
| CYP2D6    | 22q13.2       | 0.182802 | 0.000329 | 0.001425 |
| MED10     | 5p15.31       | -0.18279 | 0.000329 | 0.001426 |
| CCDC127   | 5p15.33       | -0.18278 | 0.000329 | 0.001426 |
| SOGA3     | 6q22.33       | -0.18275 | 0.00033  | 0.001429 |
| ESR2      | 14q23.2-q23.3 | 0.182713 | 0.000331 | 0.001434 |
| TMCO6     | 5q31.3        | 0.182666 | 0.000332 | 0.001438 |
| EXOG      | 3p22.2        | 0.18262  | 0.000333 | 0.001443 |
| ANO6      | 12q12         | -0.1826  | 0.000334 | 0.001445 |
| GADD45B   | 19p13.3       | -0.18258 | 0.000334 | 0.001447 |
| GPRIN1    | 5q35.2        | 0.182575 | 0.000335 | 0.001447 |
| CHODL     | 21q21.1       | -0.18255 | 0.000335 | 0.00145  |
| PYGO1     | 15q21.3       | -0.18254 | 0.000336 | 0.00145  |
| C2ORF27A  | 2q21.2        | -0.18254 | 0.000336 | 0.00145  |
| SLA       | 8q24.22       | -0.18254 | 0.000336 | 0.00145  |
| NOVA1     | 14q12         | -0.18252 | 0.000336 | 0.001451 |
| C10ORF91  | 10q26.3       | 0.182493 | 0.000337 | 0.001454 |

|            |                |          |          |          |
|------------|----------------|----------|----------|----------|
| ORMDL3     | 17q21.1        | -0.18249 | 0.000337 | 0.001455 |
| CHMP6      | 17q25.3        | -0.18245 | 0.000338 | 0.001459 |
| NUTM2F     | 9q22.32        | 0.182442 | 0.000338 | 0.001459 |
| CCN1       | 1p22.3         | -0.18244 | 0.000338 | 0.001459 |
| ELAVL4     | 1p33-p32.3     | -0.18243 | 0.000338 | 0.00146  |
| GGT7       | 20q11.22       | -0.18242 | 0.000339 | 0.001461 |
| RMDN1      | 8q21.3         | -0.18236 | 0.00034  | 0.001467 |
| DNAH9      | 17p12          | -0.18236 | 0.00034  | 0.001467 |
| ERBB4      | 2q34           | -0.18235 | 0.000341 | 0.001468 |
| CREBZF     | 11q14.1        | 0.182318 | 0.000341 | 0.001471 |
| LOXL1      | 15q24.1        | -0.18225 | 0.000343 | 0.001479 |
| TMEM267    | 5p12           | -0.18223 | 0.000344 | 0.00148  |
| ANGPTL8    | 19p13.2        | 0.182153 | 0.000346 | 0.001488 |
| MRPL40     | 22q11.21       | -0.18215 | 0.000346 | 0.001488 |
| HSH2D      | 19p13.11       | 0.18214  | 0.000346 | 0.001489 |
| SMPD2      | 6q21           | 0.182136 | 0.000346 | 0.00149  |
| TMSB15A    | Xq22.1         | -0.18206 | 0.000348 | 0.001497 |
| MRFAP1L1   | 4p16.1         | -0.18206 | 0.000348 | 0.001497 |
| NCKAP1L    | 12q13.13-q13.2 | -0.18204 | 0.000349 | 0.0015   |
| BICRA      | 19q13.33       | 0.182024 | 0.000349 | 0.001501 |
| PRELID3A   | 18p11.21       | 0.182011 | 0.000349 | 0.001502 |
| UFL1       | 6q16.1         | -0.18199 | 0.00035  | 0.001504 |
| MOB4       | 2q33.1         | -0.18197 | 0.00035  | 0.001506 |
| MFSD1      | 3q25.32        | -0.18196 | 0.000351 | 0.001507 |
| FUNDC2     | Xq28           | -0.18195 | 0.000351 | 0.001508 |
| DPYS       | 8q22.3         | -0.18189 | 0.000353 | 0.001514 |
| RPS2P32    | 7p15.3         | -0.18189 | 0.000353 | 0.001514 |
| CBLC       | 19q13.32       | 0.18185  | 0.000354 | 0.001518 |
| AKT1       | 14q32.33       | 0.181825 | 0.000354 | 0.001521 |
| MGAT2      | 14q21.3        | -0.18176 | 0.000356 | 0.001528 |
| HIST1H3J   | 6p22.1         | 0.181758 | 0.000356 | 0.001528 |
| VSIG4      | Xq12           | -0.18173 | 0.000357 | 0.001531 |
| GPER1      | 7p22.3         | -0.18173 | 0.000357 | 0.001531 |
| DLX5       | 7q21.3         | -0.18172 | 0.000357 | 0.001532 |
| ZNF671     | 19q13.43       | -0.18169 | 0.000358 | 0.001535 |
| PLEKHG4    | 16q22.1        | 0.181652 | 0.000359 | 0.001539 |
| TJP3       | 19p13.3        | 0.181639 | 0.000359 | 0.00154  |
| RAB37      | 17q25.1        | -0.18162 | 0.00036  | 0.001542 |
| ADH1A      | 4q23           | -0.18162 | 0.00036  | 0.001542 |
| EPN3       | 17q21.33       | 0.181609 | 0.00036  | 0.001543 |
| ZNF674-AS1 | Xp11.3         | 0.181534 | 0.000362 | 0.001551 |
| CD28       | 2q33.2         | -0.1815  | 0.000363 | 0.001555 |
| RIN2       | 20p11.23       | -0.18149 | 0.000364 | 0.001556 |
| THAP6      | 4q21.1         | -0.18148 | 0.000364 | 0.001556 |
| KTN1-AS1   | 14q22.3        | -0.18148 | 0.000364 | 0.001556 |
| CD4        | 12p13.31       | -0.18147 | 0.000364 | 0.001558 |
| DCX        | Xq23           | -0.18146 | 0.000364 | 0.001558 |
| CWC15      | 11q21          | -0.18142 | 0.000365 | 0.001562 |
| RTTN       | 18q22.2        | 0.18142  | 0.000366 | 0.001562 |
| ZNF396     | 18q12.2        | -0.18142 | 0.000366 | 0.001562 |
| UTP15      | 5q13.2         | 0.181381 | 0.000367 | 0.001566 |
| SYPL1      | 7q22.3         | -0.18138 | 0.000367 | 0.001566 |
| CTNNA2     | 2p12           | -0.18135 | 0.000367 | 0.001569 |
| GALC       | 14q31.3        | -0.18133 | 0.000368 | 0.001571 |
| EDN1       | 6p24.1         | -0.18132 | 0.000368 | 0.001573 |
| CPSF1      | 8q24.3         | 0.181293 | 0.000369 | 0.001575 |
| VCX2       | Xp22.31        | 0.181281 | 0.000369 | 0.001576 |
| PIP4K2A    | 10p12.2        | -0.18124 | 0.000371 | 0.001581 |



|           |                |          |          |          |
|-----------|----------------|----------|----------|----------|
| ATP5F1D   | 19p13.3        | 0.181237 | 0.000371 | 0.001581 |
| HECW1     | 7p14.1-p13     | -0.18122 | 0.000371 | 0.001582 |
| CAPS2     | 12q21.1-q21.2  | -0.18121 | 0.000371 | 0.001583 |
| SH3RF3    | 2q13           | -0.18121 | 0.000371 | 0.001583 |
| GNL2      | 1p34.3         | 0.181191 | 0.000372 | 0.001585 |
| TTC28     | 22q12.1        | -0.18118 | 0.000372 | 0.001586 |
| PCYT2     | 17q25.3        | 0.181141 | 0.000373 | 0.00159  |
| TENM4     | 11q14.1        | -0.18109 | 0.000375 | 0.001596 |
| ITPKA     | 15q15.1        | 0.181084 | 0.000375 | 0.001596 |
| GNPTAB    | 12q23.2        | -0.18108 | 0.000375 | 0.001597 |
| GLRX2     | 1q31.2         | 0.181074 | 0.000375 | 0.001597 |
| CD83      | 6p23           | -0.18107 | 0.000375 | 0.001597 |
| HIST1H2AK | 6p22.1         | 0.181064 | 0.000376 | 0.001597 |
| SERINC3   | 20q13.12       | -0.18106 | 0.000376 | 0.001598 |
| HLA-DQB1  | 6p21.32        | -0.18102 | 0.000377 | 0.001603 |
| FAM83C    | 20q11.22       | -0.18094 | 0.000379 | 0.001612 |
| SPDYA     | 2p23.2         | 0.180927 | 0.000379 | 0.001613 |
| BNC1      | 15q25.2        | -0.18091 | 0.00038  | 0.001614 |
| INPP4B    | 4q31.21        | -0.18088 | 0.000381 | 0.001618 |
| DAP3      | 1q22           | 0.180879 | 0.000381 | 0.001618 |
| GIN1      | 5q21.1         | -0.18082 | 0.000383 | 0.001625 |
| TMEM140   | 7q33           | -0.1808  | 0.000383 | 0.001626 |
| BRD3      | 9q34.2         | 0.180797 | 0.000383 | 0.001627 |
| HP        | 16q22.2        | -0.18077 | 0.000384 | 0.00163  |
| F2RL2     | 5q13.3         | -0.18074 | 0.000385 | 0.001632 |
| PDZD8     | 10q25.3-q26.11 | 0.180743 | 0.000385 | 0.001632 |
| SLC22A20P | 11q13.1        | 0.180725 | 0.000385 | 0.001634 |
| EBP       | Xp11.23        | 0.180709 | 0.000386 | 0.001636 |
| VTI1A     | 10q25.2        | 0.180708 | 0.000386 | 0.001636 |
| UAP1L1    | 9q34.3         | 0.180705 | 0.000386 | 0.001636 |
| TAF7      | 5q31.3         | -0.18067 | 0.000387 | 0.001639 |
| SHISA9    | 16p13.12       | -0.18067 | 0.000387 | 0.001639 |
| CACNB3    | 12q13.12       | 0.180645 | 0.000388 | 0.001642 |
| LINC00634 | 22q13.2        | 0.180639 | 0.000388 | 0.001643 |
| PDE1B     | 12q13.2        | -0.18063 | 0.000388 | 0.001644 |
| NBEAP1    | 15q11.2        | -0.18061 | 0.000389 | 0.001645 |
| BFAR      | 16p13.12       | -0.18061 | 0.000389 | 0.001645 |
| DYNC1LI1  | 3p22.3         | -0.1806  | 0.000389 | 0.001646 |
| DHX38     | 16q22.2        | 0.180594 | 0.000389 | 0.001646 |
| NDRG2     | 14q11.2        | -0.18059 | 0.000389 | 0.001647 |
| SELENOI   | 2p23.3         | 0.18058  | 0.00039  | 0.001647 |
| MCTP1     | 5q15           | -0.18057 | 0.00039  | 0.001648 |
| LRRC70    | 5q12.1         | -0.18054 | 0.000391 | 0.001652 |
| GLI2      | 2q14.2         | -0.18053 | 0.000391 | 0.001652 |
| ARHGAP36  | Xq26.1         | -0.18053 | 0.000391 | 0.001653 |
| ZNF676    | 19p12          | -0.18051 | 0.000392 | 0.001654 |
| WASF3     | 13q12.13       | -0.18048 | 0.000393 | 0.001658 |
| ALPG      | 2q37.1         | 0.18045  | 0.000393 | 0.001661 |
| AIG1      | 6q24.2         | -0.18044 | 0.000394 | 0.001662 |
| L1CAM     | Xq28           | -0.18043 | 0.000394 | 0.001663 |
| RASGRP3   | 2p22.3         | -0.18041 | 0.000395 | 0.001665 |
| HCK       | 20q11.21       | -0.18041 | 0.000395 | 0.001665 |
| FOXK2     | 17q25.3        | 0.180393 | 0.000395 | 0.001667 |
| CWF19L2   | 11q22.3        | -0.18039 | 0.000395 | 0.001667 |
| DUS2      | 16q22.1        | 0.180356 | 0.000396 | 0.001671 |
| UPK3B     | 7q11.2         | 0.180329 | 0.000397 | 0.001674 |
| ABCF1     | 6p21.33        | 0.180317 | 0.000397 | 0.001675 |
| PKD1      | 16p13.3        | 0.180285 | 0.000398 | 0.001679 |

|              |          |          |          |          |
|--------------|----------|----------|----------|----------|
| EMX2OS       | 10q26.11 | -0.18027 | 0.000399 | 0.00168  |
| HIST1H3I     | 6p22.1   | 0.18027  | 0.000399 | 0.00168  |
| SLC16A12     | 10q23.31 | -0.18026 | 0.000399 | 0.001681 |
| TLNRD1       | 15q25.1  | 0.180259 | 0.000399 | 0.001681 |
| IGSF10       | 3q25.1   | -0.18025 | 0.000399 | 0.001681 |
| ACTC1        | 15q14    | -0.18025 | 0.000399 | 0.001681 |
| LOC100130987 | 11q13.2  | 0.180237 | 0.0004   | 0.001682 |
| LINC00852    | 3p25.3   | 0.180222 | 0.0004   | 0.001684 |
| HOXD9        | 2q31.1   | -0.18022 | 0.0004   | 0.001684 |
| ADGRF1       | 6p12.3 6 | 0.180215 | 0.000401 | 0.001684 |
| MANBAL       | 20q11.23 | -0.18018 | 0.000402 | 0.001688 |
| MMP9         | 20q13.12 | -0.18009 | 0.000404 | 0.001699 |
| PPIL6        | 6q21     | 0.180059 | 0.000405 | 0.001703 |
| LRR1         | 14q21.3  | 0.180054 | 0.000405 | 0.001703 |
| NAT10        | 11p13    | 0.180045 | 0.000406 | 0.001704 |
| SLC4A5       | 2p13.1   | 0.180012 | 0.000407 | 0.001708 |
| SPOUT1       | 9q34.11  | 0.179981 | 0.000408 | 0.001712 |
| EBI3         | 19p13.3  | -0.17998 | 0.000408 | 0.001712 |
| MUC1         | 1q22     | 0.179963 | 0.000408 | 0.001713 |
| H3F3C        | 12p11.21 | -0.17992 | 0.00041  | 0.001719 |
| RAD9B        | 12q24.11 | 0.179912 | 0.00041  | 0.001719 |
| DES          | 2q35     | -0.17989 | 0.00041  | 0.001721 |
| STX12        | 1p35.3   | -0.17989 | 0.000411 | 0.001721 |
| PRO0611      | 1p35.2   | 0.179854 | 0.000412 | 0.001725 |
| RGS22        | 8q22.2   | -0.17985 | 0.000412 | 0.001725 |
| ULK2         | 17p11.2  | -0.17983 | 0.000412 | 0.001728 |
| FNDC5        | 1p35.1   | -0.17982 | 0.000413 | 0.001729 |
| CCDC28A      | 6q24.1   | -0.17981 | 0.000413 | 0.00173  |
| SERPINH1     | 11q13.5  | -0.1798  | 0.000413 | 0.001731 |
| TMBIM1       | 2q35     | -0.17978 | 0.000414 | 0.001733 |
| SMIM29       | 6p21.31  | -0.17977 | 0.000414 | 0.001734 |
| OTUB2        | 14q32.12 | 0.179769 | 0.000414 | 0.001734 |
| INO80        | 15q15.1  | 0.179767 | 0.000414 | 0.001734 |
| TNNI2        | 11p15.5  | -0.17973 | 0.000415 | 0.001738 |
| MMP14        | 14q11.2  | -0.17973 | 0.000415 | 0.001738 |
| ETAA1        | 2p14     | -0.17973 | 0.000415 | 0.001738 |
| LOC730668    | 22q13.31 | 0.179716 | 0.000416 | 0.001739 |
| DLL4         | 15q15.1  | -0.17971 | 0.000416 | 0.001739 |
| RCN2         | 15q24.3  | -0.1797  | 0.000416 | 0.00174  |
| TEAD4        | 12p13.33 | 0.179696 | 0.000417 | 0.00174  |
| PPIL3        | 2q33.1   | -0.17969 | 0.000417 | 0.001741 |
| MMP23B       | 1p36.33  | -0.17966 | 0.000418 | 0.001745 |
| BRPF1        | 3p25.3   | 0.179654 | 0.000418 | 0.001745 |
| SPAG4        | 20q11.22 | -0.17964 | 0.000418 | 0.001746 |
| RREB1        | 6p24.3   | 0.179617 | 0.000419 | 0.001749 |
| ACAT2        | 6q25.3   | 0.179588 | 0.00042  | 0.001752 |
| MAP2K4       | 17p12    | -0.17957 | 0.00042  | 0.001754 |
| ZMAT2        | 5q31.3   | -0.17954 | 0.000421 | 0.001758 |
| IPO4         | 14q12    | 0.179535 | 0.000422 | 0.001758 |
| UBE2D4       | 7p13     | -0.17948 | 0.000423 | 0.001765 |
| PCDHA12      | 5q31.3   | -0.17945 | 0.000424 | 0.001769 |
| SMC5         | 9q21.12  | 0.17944  | 0.000425 | 0.00177  |
| C5ORF49      | 5p15.31  | -0.17942 | 0.000425 | 0.001772 |
| GPR162       | 12p13.31 | -0.17942 | 0.000425 | 0.001772 |
| B2M          | 15q21.1  | -0.1794  | 0.000426 | 0.001774 |
| SMYD2        | 1q32.3   | 0.179381 | 0.000427 | 0.001776 |
| FIS1         | 7q22.1   | -0.17936 | 0.000427 | 0.001778 |
| SPI1         | 11p11.2  | -0.1793  | 0.000429 | 0.001786 |

|              |            |          |          |          |
|--------------|------------|----------|----------|----------|
| LZTS1        | 8p21.3     | -0.1793  | 0.000429 | 0.001786 |
| CST7         | 20p11.21   | -0.17928 | 0.00043  | 0.001788 |
| ILKAP        | 2q37.3     | 0.179283 | 0.00043  | 0.001788 |
| RNF123       | 3p21.31    | 0.179278 | 0.00043  | 0.001788 |
| ANO9         | 11p15.5    | 0.179275 | 0.00043  | 0.001788 |
| STMN4        | 8p21.2     | -0.17925 | 0.000431 | 0.00179  |
| ZNF235       | 19q13.31   | -0.17923 | 0.000432 | 0.001794 |
| CD36         | 7q21.11    | -0.17922 | 0.000432 | 0.001795 |
| SERPINA7     | Xq22.3     | -0.17921 | 0.000432 | 0.001795 |
| RPRD2        | 1q21.2     | 0.179187 | 0.000433 | 0.001798 |
| FCHO2        | 5q13.2     | -0.17916 | 0.000434 | 0.001801 |
| ARL11        | 13q14.2    | -0.17914 | 0.000434 | 0.001803 |
| TBC1D9B      | 5q35.3     | 0.179116 | 0.000435 | 0.001806 |
| PCNP         | 3q12.3     | -0.1791  | 0.000436 | 0.001808 |
| ZCCHC12      | Xq24       | -0.17904 | 0.000438 | 0.001816 |
| EXOC5        | 14q22.3    | -0.17904 | 0.000438 | 0.001816 |
| SPIN4        | Xq11.1     | 0.178989 | 0.000439 | 0.001822 |
| OR51E2       | 11p15.4    | -0.17895 | 0.000441 | 0.001828 |
| FGF5         | 4q21.21    | -0.17891 | 0.000442 | 0.001832 |
| TIMM29       | 19p13.2    | 0.178877 | 0.000443 | 0.001836 |
| LOC100130238 | 12q24.33   | 0.178855 | 0.000444 | 0.001839 |
| C1GALT1C1    | Xq24       | -0.17883 | 0.000445 | 0.001842 |
| POLR1C       | 6p21.1     | 0.178818 | 0.000445 | 0.001844 |
| BAG6         | 6p21.33    | 0.178772 | 0.000447 | 0.001849 |
| PLEKHN1      | 1p36.33    | 0.178771 | 0.000447 | 0.001849 |
| GBP1P1       | 1p22.2     | -0.17877 | 0.000447 | 0.001849 |
| SAV1         | 14q22.1    | -0.17876 | 0.000447 | 0.00185  |
| THOC2        | Xq25       | 0.178757 | 0.000447 | 0.00185  |
| IGFBPL1      | 9p13.1     | -0.17873 | 0.000448 | 0.001853 |
| CD151        | 11p15.5    | -0.17872 | 0.000448 | 0.001854 |
| CD74         | 5q33.1     | -0.1787  | 0.000449 | 0.001857 |
| GAB3         | Xq28       | -0.1787  | 0.000449 | 0.001857 |
| FAM225B      | 9q32       | -0.17869 | 0.000449 | 0.001857 |
| CEP250       | 20q11.22   | 0.178661 | 0.00045  | 0.001861 |
| DACH1        | 13q21.33   | -0.17863 | 0.000451 | 0.001865 |
| PXMP2        | 12q24.33   | 0.178612 | 0.000452 | 0.001867 |
| RAD23B       | 9q31.2     | 0.178595 | 0.000452 | 0.001869 |
| PLA2G1B      | 12q24.31   | -0.17859 | 0.000453 | 0.001869 |
| BBS5         | 2q31.1     | -0.17859 | 0.000453 | 0.001869 |
| ZNF860       | 3p23-p22.3 | 0.178565 | 0.000454 | 0.001872 |
| APBB1IP      | 10p12.1    | -0.17855 | 0.000454 | 0.001874 |
| ATP8B4       | 15q21.2    | -0.1785  | 0.000456 | 0.00188  |
| CDAN1        | 15q15.2    | 0.178495 | 0.000456 | 0.001881 |
| SMARCAD1     | 4q22.3     | -0.17845 | 0.000458 | 0.001888 |
| LYVE1        | 11p15.4    | -0.17843 | 0.000458 | 0.001889 |
| AICDA        | 12p13.31   | -0.17841 | 0.000459 | 0.001892 |
| LTF          | 3p21.31    | -0.17835 | 0.000461 | 0.0019   |
| PRKDC        | 8q11.21    | 0.17833  | 0.000462 | 0.001902 |
| LINC00654    | 20p12.3    | -0.17832 | 0.000462 | 0.001903 |
| ZNF788P      | 19p13.2    | -0.17832 | 0.000462 | 0.001903 |
| CLCN5        | Xp11.23    | 0.178278 | 0.000463 | 0.001909 |
| CA11         | 19q13.33   | -0.17826 | 0.000464 | 0.001911 |
| CCDC88A      | 2p16.1     | -0.17825 | 0.000464 | 0.001912 |
| GRWD1        | 19q13.33   | 0.178201 | 0.000466 | 0.001919 |
| HPS5         | 11p15.1    | -0.17819 | 0.000466 | 0.001919 |
| MC5R         | 18p11.21   | -0.17813 | 0.000468 | 0.001928 |
| ANKRD53      | 2p13.3     | -0.17813 | 0.000469 | 0.001928 |
| RNF157       | 17q25.1    | 0.178101 | 0.00047  | 0.001931 |

|          |                    |          |          |          |
|----------|--------------------|----------|----------|----------|
| KAT2A    | 17q21.2            | 0.178093 | 0.00047  | 0.001932 |
| FYB1     | 5p13.1             | -0.17808 | 0.00047  | 0.001934 |
| TBC1D22B | 6p21.2             | 0.178071 | 0.000471 | 0.001935 |
| LSM1     | 8p11.23            | -0.17803 | 0.000472 | 0.00194  |
| ILF2     | 1q21.3             | 0.177983 | 0.000474 | 0.001946 |
| EVI2B    | 17q11.2            | -0.17798 | 0.000474 | 0.001946 |
| MINDY3   | 10p13              | -0.17798 | 0.000474 | 0.001946 |
| OIT3     | 10q22.1            | -0.17797 | 0.000474 | 0.001947 |
| CCDC168  | 13q33.1            | 0.17796  | 0.000475 | 0.001948 |
| TK2      | 16q21              | -0.17794 | 0.000475 | 0.00195  |
| PLA2G12B | 10q22.1            | -0.1779  | 0.000477 | 0.001956 |
| IL3RA    | Xp22.33 and Yp11.2 | -0.17789 | 0.000477 | 0.001957 |
| ZNF322   | 6p22.2             | -0.17785 | 0.000478 | 0.001963 |
| OCEL1    | 19p13.11           | -0.17784 | 0.000479 | 0.001964 |
| IFNAR1   | 21q22.11           | -0.17782 | 0.00048  | 0.001966 |
| EGOT     | 3p26.1             | -0.17782 | 0.00048  | 0.001966 |
| PABPC1L  | 20q13.12           | 0.177813 | 0.00048  | 0.001967 |
| ZCCHC18  | Xq22.2             | -0.17779 | 0.000481 | 0.00197  |
| SLC25A51 | 9p13.2-p13.1       | 0.177786 | 0.000481 | 0.00197  |
| INAVA    | 1q32.1             | 0.177756 | 0.000482 | 0.001974 |
| CCDC107  | 9p13.3             | -0.17771 | 0.000483 | 0.00198  |
| LIPE     | 19q13.2            | 0.177703 | 0.000484 | 0.001981 |
| AS3MT    | 10q24.32           | -0.17767 | 0.000485 | 0.001985 |
| ITGA9    | 3p22.2             | -0.17766 | 0.000485 | 0.001986 |
| SULF2    | 20q13.12           | -0.17766 | 0.000485 | 0.001987 |
| NAALADL2 | 3q26.31            | -0.17764 | 0.000486 | 0.001988 |
| LYG1     | 2q11.2             | 0.177641 | 0.000486 | 0.001988 |
| ABHD12   | 20p11.21           | -0.17759 | 0.000488 | 0.001994 |
| SORCS1   | 10q25.1            | -0.17759 | 0.000488 | 0.001995 |
| FFAR4    | 10q23.33           | 0.177568 | 0.000489 | 0.001998 |
| SLC5A7   | 2q12.3             | -0.17754 | 0.00049  | 0.002002 |
| EPS8L3   | 1p13.3             | 0.177531 | 0.00049  | 0.002002 |
| FUT4     | 11q21              | 0.177483 | 0.000492 | 0.002009 |
| SOHLH2   | 13q13.3            | -0.17746 | 0.000493 | 0.002012 |
| PRDM12   | 9q34.12            | 0.17743  | 0.000494 | 0.002016 |
| C1ORF50  | 1p34.2             | -0.17741 | 0.000494 | 0.002019 |
| NPY5R    | 4q32.2             | -0.17738 | 0.000495 | 0.002022 |
| SLC16A13 | 17p13.1            | 0.177368 | 0.000496 | 0.002024 |
| TXNDC9   | 2q11.2             | -0.17736 | 0.000496 | 0.002025 |
| FBXO46   | 19q13.32           | 0.177356 | 0.000496 | 0.002025 |
| PDGFA    | 7p22.3             | -0.17733 | 0.000497 | 0.002029 |
| FEZF1    | 7q31.32            | 0.177299 | 0.000499 | 0.002033 |
| KLRG1    | 12p13.31           | -0.17729 | 0.000499 | 0.002034 |
| ZNF691   | 1p34.2             | -0.17726 | 0.0005   | 0.002039 |
| IFT52    | 20q13.12           | -0.17725 | 0.0005   | 0.00204  |
| RIC3     | 11p15.4            | -0.17724 | 0.000501 | 0.002041 |
| TOP3A    | 17p11.2            | 0.177233 | 0.000501 | 0.002041 |
| TTC7B    | 14q32.11           | -0.17722 | 0.000501 | 0.002042 |
| EPAS1    | 2p21               | -0.17722 | 0.000501 | 0.002042 |
| PBOV1    | 6q23.3             | 0.177208 | 0.000502 | 0.002043 |
| DGCR10   | 22q11.21           | 0.177186 | 0.000503 | 0.002046 |
| CERKL    | 2q31.3             | -0.17716 | 0.000504 | 0.00205  |
| ARMC4    | 10p12.1            | -0.17715 | 0.000504 | 0.002052 |
| PANX1    | 11q21              | -0.17712 | 0.000505 | 0.002055 |
| MAML2    | 11q21              | -0.17709 | 0.000506 | 0.002059 |
| SMG1     | 16p12.3            | 0.177091 | 0.000506 | 0.002059 |
| PPP1R13L | 19q13.32           | 0.177083 | 0.000507 | 0.00206  |
| IMPA1    | 8q21.13            | -0.17707 | 0.000507 | 0.002061 |

|           |                 |          |          |          |
|-----------|-----------------|----------|----------|----------|
| PIK3C3    | 18q12.3         | -0.17706 | 0.000507 | 0.002062 |
| LOC283856 | 16q13           | -0.17706 | 0.000508 | 0.002062 |
| CAMLG     | 5q31.1          | -0.17702 | 0.000509 | 0.002067 |
| KIF5C     | 2q23.1-q23.2    | -0.17699 | 0.00051  | 0.002072 |
| TMEM216   | 11q12.2         | -0.17699 | 0.00051  | 0.002072 |
| NUPR1     | 16p11.2         | -0.17687 | 0.000515 | 0.00209  |
| DYNLRB2   | 16q23.2         | -0.17686 | 0.000515 | 0.002091 |
| HACL1     | 3p25.1          | -0.17683 | 0.000516 | 0.002095 |
| TIMM13    | 19p13.3         | 0.176781 | 0.000518 | 0.002102 |
| DOCK10    | 2q36.2          | -0.17677 | 0.000519 | 0.002104 |
| TMEM158   | 3p21.31         | -0.17675 | 0.000519 | 0.002106 |
| UBL7      | 15q24.1         | -0.17675 | 0.000519 | 0.002106 |
| PRR34     | 22q13.31        | -0.17673 | 0.00052  | 0.002109 |
| FARSB     | 2q36.1          | 0.176724 | 0.00052  | 0.002109 |
| BHLHB9    | Xq22.1          | -0.17672 | 0.00052  | 0.002109 |
| CAPN7     | 3p25.1          | -0.1767  | 0.000521 | 0.002111 |
| ITPK1     | 14q32.12        | 0.1767   | 0.000521 | 0.002111 |
| KRBA1     | 7q36.1          | -0.17663 | 0.000524 | 0.002121 |
| CRYM-AS1  | 16p12.2         | 0.176625 | 0.000524 | 0.002122 |
| SCD5      | 4q21.22         | -0.17662 | 0.000524 | 0.002122 |
| PLA2G2D   | 1p36.12         | -0.17661 | 0.000525 | 0.002123 |
| KRCC1     | 2p11.2          | -0.1766  | 0.000525 | 0.002125 |
| PAPPA2    | 1q25.2          | -0.17654 | 0.000527 | 0.002133 |
| FTO       | 16q12.2         | -0.17646 | 0.000531 | 0.002147 |
| PSTPIP2   | 18q21.1 tdb7990 | -0.17645 | 0.000531 | 0.002147 |
| EPHX1     | 1q42.12         | -0.17644 | 0.000531 | 0.002148 |
| TCERG1L   | 10q26.3         | -0.17644 | 0.000531 | 0.002148 |
| TNFAIP3   | 6q23.3          | -0.17642 | 0.000532 | 0.002151 |
| HAND1     | 5q33.2          | -0.1764  | 0.000533 | 0.002153 |
| KCTD2     | 17q25.1         | -0.17636 | 0.000534 | 0.002159 |
| ABCB5     | 7p21.1          | -0.17636 | 0.000535 | 0.00216  |
| PA2G4P4   | 3q25.31         | 0.176347 | 0.000535 | 0.002161 |
| BLOC1S6   | 15q21.1         | -0.17634 | 0.000535 | 0.002162 |
| MPPED1    | 22q13.2         | -0.17631 | 0.000536 | 0.002166 |
| SIRT6     | 19p13.3         | 0.176295 | 0.000537 | 0.002168 |
| WDR60     | 7q36.3          | 0.176288 | 0.000537 | 0.002169 |
| GPR137B   | 1q42.3          | -0.17626 | 0.000539 | 0.002173 |
| PCSK7     | 11q23.3         | 0.176122 | 0.000544 | 0.002195 |
| YIF1B     | 19q13.2         | 0.176101 | 0.000545 | 0.002198 |
| CNNM1     | 10q24.2         | -0.17609 | 0.000545 | 0.002198 |
| CYB5R1    | 1q32.1          | -0.17604 | 0.000547 | 0.002207 |
| PCDHGA12  | 5q31.3          | -0.17603 | 0.000548 | 0.002207 |
| RAB25     | 1q22            | 0.176028 | 0.000548 | 0.002208 |
| KRTAP5-8  | 11q13.4         | 0.176009 | 0.000549 | 0.00221  |
| PRR12     | 19q13.33        | 0.175981 | 0.00055  | 0.002215 |
| GAPVD1    | 9q33.3          | 0.17593  | 0.000552 | 0.002223 |
| PCOLCE2   | 3q23            | -0.17591 | 0.000553 | 0.002226 |
| TGFB2     | 1q41            | -0.1759  | 0.000553 | 0.002227 |
| GCNT4     | 5q13.3          | -0.17588 | 0.000554 | 0.002229 |
| CSTF3     | 11p13           | 0.175856 | 0.000555 | 0.002233 |
| RIOX1     | 14q24.3         | 0.175818 | 0.000556 | 0.002239 |
| AMPD2     | 1p13.3          | 0.175789 | 0.000558 | 0.002243 |
| POLG      | 15q26.1         | 0.175784 | 0.000558 | 0.002243 |
| IFI35     | 17q21.31        | -0.17576 | 0.000559 | 0.002247 |
| PCNX2     | 1q42.2          | 0.175753 | 0.000559 | 0.002248 |
| LURAP1    | 1p34.1          | -0.17572 | 0.000561 | 0.002253 |
| SRSF11    | 1p31.1          | 0.175696 | 0.000562 | 0.002256 |
| HIST2H2AB | 1q21.2          | 0.175694 | 0.000562 | 0.002256 |

|              |          |          |          |          |
|--------------|----------|----------|----------|----------|
| GNG7         | 19p13.3  | -0.17567 | 0.000563 | 0.00226  |
| SMARCD1      | 12q13.12 | 0.175666 | 0.000563 | 0.00226  |
| ZNF563       | 19p13.2  | -0.17566 | 0.000563 | 0.002261 |
| EIF3E        | 8q23.1   | -0.17565 | 0.000564 | 0.002262 |
| BTBD10       | 11p15.3  | -0.17562 | 0.000565 | 0.002267 |
| CLCNKB       | 1p36.13  | -0.1756  | 0.000566 | 0.002269 |
| C9ORF24      | 9p13.3   | 0.175594 | 0.000566 | 0.002269 |
| EPHB1        | 3q22.2   | -0.17559 | 0.000566 | 0.002269 |
| CD200R1      | 3q13.2   | -0.17559 | 0.000566 | 0.002269 |
| COL5A2       | 2q32.2   | -0.17559 | 0.000566 | 0.002269 |
| TMOD1        | 9q22.33  | -0.17559 | 0.000566 | 0.002269 |
| GRIK2        | 6q16.3   | -0.17557 | 0.000567 | 0.002271 |
| KIZ          | 20p11.23 | -0.17555 | 0.000568 | 0.002274 |
| LOC100132215 | 2p15     | 0.175549 | 0.000568 | 0.002274 |
| PICK1        | 22q13.1  | 0.175429 | 0.000573 | 0.002294 |
| ZNF32        | 10q11.21 | -0.17541 | 0.000574 | 0.002297 |
| CPNE9        | 3p25.3   | -0.1754  | 0.000574 | 0.002298 |
| FEM1B        | 15q23    | -0.17534 | 0.000576 | 0.002307 |
| CLECL1       | 12p13.31 | -0.17532 | 0.000577 | 0.002311 |
| GPR135       | 14q23.1  | 0.175292 | 0.000578 | 0.002314 |
| PTGS1        | 9q33.2   | -0.17529 | 0.000579 | 0.002314 |
| SSH3         | 11q13.2  | 0.175281 | 0.000579 | 0.002316 |
| KIAA0408     | 6q22.33  | -0.17526 | 0.00058  | 0.002318 |
| DPM2         | 9q34.11  | 0.175258 | 0.00058  | 0.002319 |
| GYG1         | 3q24     | -0.17523 | 0.000581 | 0.002323 |
| SCAF1        | 19q13.33 | 0.175227 | 0.000581 | 0.002323 |
| ISM2         | 14q24.3  | -0.17521 | 0.000582 | 0.002326 |
| POLR1A       | 2p11.2   | 0.175205 | 0.000582 | 0.002326 |
| FCHSD2       | 11q13.4  | -0.1752  | 0.000582 | 0.002326 |
| C11ORF96     | 11p11.2  | -0.17519 | 0.000583 | 0.002327 |
| GBP6         | 1p22.2   | -0.17518 | 0.000583 | 0.002328 |
| SNTA1        | 20q11.21 | -0.17517 | 0.000584 | 0.002329 |
| CDC42BPB     | 14q32.32 | 0.175161 | 0.000584 | 0.002331 |
| SHANK1       | 19q13.33 | -0.17515 | 0.000585 | 0.002333 |
| ANKRD16      | 10p15.1  | 0.175137 | 0.000585 | 0.002334 |
| SAMD13       | 1p31.1   | -0.17514 | 0.000585 | 0.002334 |
| UHRF1BP1L    | 12q23.1  | -0.17511 | 0.000586 | 0.002337 |
| HNRNPLL      | 2p22.1   | -0.1751  | 0.000587 | 0.002339 |
| ITGB2        | 21q22.3  | -0.17509 | 0.000587 | 0.00234  |
| APOBEC3D     | 22q13.1  | -0.17508 | 0.000588 | 0.002342 |
| DCAF1        | 3p21.2   | 0.175074 | 0.000588 | 0.002342 |
| NOP16        | 5q35.2   | 0.175044 | 0.000589 | 0.002347 |
| CD300LF      | 17q25.1  | -0.17504 | 0.000589 | 0.002347 |
| OXT          | 20p13    | -0.17496 | 0.000593 | 0.00236  |
| PLEKHB1      | 11q13.4  | -0.17496 | 0.000593 | 0.002361 |
| WNT9B        | 17q21.32 | -0.1749  | 0.000595 | 0.00237  |
| TAC1         | 7q21.3   | -0.17486 | 0.000597 | 0.002377 |
| CFAP126      | 1q23.3   | 0.174856 | 0.000597 | 0.002377 |
| CRTAP        | 3p22.3   | -0.17485 | 0.000598 | 0.002377 |
| NIT1         | 1q23.3   | 0.174849 | 0.000598 | 0.002377 |
| BRINP2       | 1q25.2   | -0.17484 | 0.000598 | 0.002379 |
| ARSD         | Xp22.33  | -0.17481 | 0.000599 | 0.002382 |
| CHRNA6       | 8p11.21  | -0.17481 | 0.0006   | 0.002383 |
| HOXA6        | 7p15.2   | 0.174771 | 0.000601 | 0.002389 |
| CRYBB3       | 22q11.23 | 0.17477  | 0.000601 | 0.002389 |
| TIMD4        | 5q33.3   | -0.17475 | 0.000602 | 0.002392 |
| REX1BD       | 19p13.11 | 0.174725 | 0.000603 | 0.002396 |
| SEPTIN6      | Xq24     | -0.17471 | 0.000604 | 0.002397 |

|              |                 |          |          |          |
|--------------|-----------------|----------|----------|----------|
| CHST3        | 10q22.1         | -0.1747  | 0.000604 | 0.002399 |
| ALYREF       | 17q25.3         | 0.174677 | 0.000605 | 0.002403 |
| CSMD2        | 1p35.1          | -0.1746  | 0.000609 | 0.002415 |
| ZBTB3        | 11q12.3         | 0.1746   | 0.000609 | 0.002415 |
| HIC2         | 22q11.21        | 0.174587 | 0.000609 | 0.002417 |
| RCOR1        | 14q32.31-q32.32 | 0.174564 | 0.00061  | 0.002421 |
| ZFR          | 5p13.3          | -0.17456 | 0.00061  | 0.002421 |
| SGCB         | 4q12            | -0.17454 | 0.000612 | 0.002425 |
| ZNF578       | 19q13.41        | -0.17452 | 0.000612 | 0.002427 |
| LOC100126784 | 11p15.1         | -0.17452 | 0.000612 | 0.002427 |
| DCTD         | 4q35.1          | -0.17449 | 0.000613 | 0.002431 |
| EPHA6        | 3q11.2          | -0.17449 | 0.000614 | 0.002431 |
| HTATIP2      | 11p15.1         | -0.17445 | 0.000615 | 0.002438 |
| FAM95B1      | 9p11.2          | 0.174434 | 0.000616 | 0.00244  |
| GARS         | 7p14.3          | 0.174417 | 0.000617 | 0.002443 |
| IGSF5        | 21q22.2         | -0.17437 | 0.000619 | 0.00245  |
| FBL          | 19q13.2         | 0.17436  | 0.00062  | 0.002452 |
| CA5BP1       | Xp22.2          | 0.174339 | 0.00062  | 0.002455 |
| PIK3R1       | 5q13.1          | -0.17434 | 0.00062  | 0.002455 |
| UGT2A3       | 4q13.2          | -0.17425 | 0.000624 | 0.002469 |
| MAOB         | Xp11.3          | -0.17425 | 0.000624 | 0.002469 |
| KIAA0586     | 14q23.1         | 0.174243 | 0.000625 | 0.002471 |
| SEMA6A       | 5q23.1          | -0.17424 | 0.000625 | 0.002471 |
| TP63         | 3q28            | -0.17422 | 0.000626 | 0.002473 |
| RRAGD        | 6q15            | -0.1742  | 0.000627 | 0.002476 |
| TYMSOS       | 18p11.32        | 0.174172 | 0.000628 | 0.002482 |
| KCNJ15       | 21q22.13-q22.2  | -0.17416 | 0.000629 | 0.002483 |
| GNA13        | 17q24.1         | -0.17416 | 0.000629 | 0.002483 |
| SMS          | Xp22.11         | 0.174146 | 0.000629 | 0.002485 |
| TFEC         | 7q31.2          | -0.17414 | 0.00063  | 0.002485 |
| LINC01101    | 2q14.2          | -0.17411 | 0.000631 | 0.002491 |
| MRPL14       | 6p21.1          | 0.174105 | 0.000631 | 0.002491 |
| SMG8         | 17q22           | -0.1741  | 0.000632 | 0.002492 |
| SLC28A1      | 15q25.3         | -0.17405 | 0.000634 | 0.0025   |
| LRRC52-AS1   | 1q23.3-q24.1    | -0.17404 | 0.000634 | 0.002502 |
| KCNH7        | 2q24.2          | -0.17403 | 0.000635 | 0.002502 |
| RBBP9        | 20p11.23        | -0.17403 | 0.000635 | 0.002502 |
| SNORA3B      | 11p15.4         | 0.174005 | 0.000636 | 0.002506 |
| PFKL         | 21q22.3         | 0.173975 | 0.000637 | 0.002511 |
| BTG2         | 1q32.1          | -0.17397 | 0.000638 | 0.002512 |
| RDM1         | 17q12           | 0.17392  | 0.00064  | 0.00252  |
| PROS1        | 3q11.1          | -0.17392 | 0.00064  | 0.00252  |
| GOLGA4       | 3p22.2          | 0.173884 | 0.000641 | 0.002526 |
| CREB1        | 2q33.3          | -0.17387 | 0.000642 | 0.002527 |
| PLXNC1       | 12q22           | -0.17386 | 0.000643 | 0.002529 |
| ARFGEF3      | 6q23.3-q24.1    | 0.173858 | 0.000643 | 0.002529 |
| MYSM1        | 1p32.1          | 0.173818 | 0.000645 | 0.002536 |
| TNNI3K       | 1p31.1          | -0.17379 | 0.000646 | 0.00254  |
| NPFF         | 12q13.13        | 0.173792 | 0.000646 | 0.00254  |
| RUNX2        | 6p21.1          | -0.17377 | 0.000647 | 0.002544 |
| TMEM120A     | 7q11.23         | -0.17376 | 0.000648 | 0.002546 |
| EYA3         | 1p35.3          | 0.17371  | 0.00065  | 0.002554 |
| ZNF324       | 19q13.43        | 0.173699 | 0.00065  | 0.002555 |
| XPOT         | 12q14.2         | 0.173665 | 0.000652 | 0.002561 |
| MIR9-3HG     | 15q26.1         | -0.17365 | 0.000652 | 0.002563 |
| ITPR2        | 12p11.23        | -0.17365 | 0.000652 | 0.002563 |
| RGS13        | 1q31.2          | -0.17363 | 0.000654 | 0.002566 |
| NRIP1        | 21q11.2-q21.1   | -0.17362 | 0.000654 | 0.002567 |

|           |               |          |          |          |
|-----------|---------------|----------|----------|----------|
| GLS       | 2q32.2        | -0.17359 | 0.000655 | 0.002572 |
| CNTN2     | 1q32.1        | -0.17359 | 0.000656 | 0.002573 |
| LRP1      | 12q13.3       | -0.17357 | 0.000656 | 0.002575 |
| EIF3A     | 10q26.11      | 0.173555 | 0.000657 | 0.002578 |
| DIP2C     | 10p15.3       | -0.17352 | 0.000659 | 0.002585 |
| POFUT1    | 20q11.21      | -0.17344 | 0.000663 | 0.002599 |
| PCDHGB5   | 5q31.3        | -0.17337 | 0.000666 | 0.002612 |
| LPIN3     | 20q12         | 0.173337 | 0.000668 | 0.002617 |
| CSNK1G3   | 5q23.2        | -0.17331 | 0.000669 | 0.002621 |
| THAP5     | 7q31.1        | -0.17331 | 0.000669 | 0.002621 |
| HMGCR     | 5q13.3        | 0.173304 | 0.000669 | 0.002621 |
| TMED5     | 1p22.1        | -0.1733  | 0.000669 | 0.002621 |
| NUDT9     | 4q22.1        | -0.1733  | 0.00067  | 0.002622 |
| CFAP45    | 1q23.2        | 0.173296 | 0.00067  | 0.002622 |
| CST6      | 11q13.1       | -0.17329 | 0.00067  | 0.002623 |
| ADAMTS12  | 5p13.3-p13.2  | -0.17323 | 0.000673 | 0.002634 |
| AQP4      | 18q11.2       | -0.1732  | 0.000674 | 0.002639 |
| IL10RB    | 21q22.11      | -0.17315 | 0.000677 | 0.002648 |
| PCDH18    | 4q28.3        | -0.17315 | 0.000677 | 0.002648 |
| GATA6     | 18q11.2       | 0.173112 | 0.000679 | 0.002654 |
| TUBA3D    | 2q21.1        | 0.173111 | 0.000679 | 0.002654 |
| GGA2      | 16p12.2       | 0.173098 | 0.000679 | 0.002656 |
| FAM149B1  | 10q22.2       | -0.17309 | 0.00068  | 0.002656 |
| NCF4      | 22q12.3       | -0.17308 | 0.00068  | 0.002658 |
| PRKCB     | 16p12.2-p12.1 | -0.17308 | 0.00068  | 0.002659 |
| VAC14     | 16q22.1-q22.2 | 0.173074 | 0.000681 | 0.002659 |
| ABR       | 17p13.3       | 0.173066 | 0.000681 | 0.002659 |
| SNAPC5    | 15q22.31      | -0.17305 | 0.000682 | 0.002662 |
| AAR2      | 20q11.23      | -0.17305 | 0.000682 | 0.002662 |
| SYT6      | 1p13.2        | -0.17304 | 0.000682 | 0.002662 |
| ANTXR2    | 4q21.21       | -0.17304 | 0.000682 | 0.002663 |
| ENO1      | 1p36.23       | 0.172949 | 0.000687 | 0.00268  |
| SERF1A    | 5q13.2        | -0.17294 | 0.000687 | 0.00268  |
| PTPDC1    | 9q22.32       | 0.172917 | 0.000688 | 0.002685 |
| SSTR2     | 17q25.1       | -0.17286 | 0.000691 | 0.002696 |
| GFPT1     | 2p13.3        | 0.172828 | 0.000693 | 0.002701 |
| EXOSC8    | 13q13.3       | 0.172813 | 0.000694 | 0.002703 |
| GNB5      | 15q21.2       | -0.17281 | 0.000694 | 0.002703 |
| UQCC3     | 11q12.3       | 0.172804 | 0.000694 | 0.002704 |
| CD34      | 1q32.2        | -0.17279 | 0.000695 | 0.002707 |
| ARHGAP32  | 11q24.3       | 0.172769 | 0.000696 | 0.00271  |
| SLC4A7    | 3p24.1        | -0.17277 | 0.000696 | 0.00271  |
| VWA3B     | 2q11.2        | 0.172767 | 0.000696 | 0.00271  |
| RUVBL1    | 3q21.3        | 0.172747 | 0.000697 | 0.002713 |
| CDCA7     | 2q31.1        | 0.172716 | 0.000699 | 0.002719 |
| DLEC1     | 3p22.2        | 0.172702 | 0.000699 | 0.002721 |
| MAFK      | 7p22.3        | 0.172667 | 0.000701 | 0.002727 |
| EPHB6     | 7q34          | -0.17266 | 0.000702 | 0.002728 |
| LIPT1     | 2q11.2        | -0.17266 | 0.000702 | 0.002728 |
| APLP1     | 19q13.12      | -0.17263 | 0.000703 | 0.002733 |
| RWDD2B    | 21q21.3       | -0.17262 | 0.000703 | 0.002734 |
| SLC7A5    | 16q24.2       | 0.172615 | 0.000704 | 0.002735 |
| LINC01587 | 4p16.2        | -0.1726  | 0.000705 | 0.002738 |
| MIR924HG  | 18q12.2-q12.3 | 0.172516 | 0.000709 | 0.002754 |
| SEC23A    | 14q21.1       | -0.1725  | 0.00071  | 0.002757 |
| SYF2      | 1p36.11       | -0.1725  | 0.00071  | 0.002757 |
| NAA10     | Xq28          | 0.172457 | 0.000712 | 0.002764 |
| GRIA3     | Xq25          | -0.17245 | 0.000712 | 0.002764 |



|          |          |          |          |          |
|----------|----------|----------|----------|----------|
| WDPCP    | 2p15     | -0.17245 | 0.000712 | 0.002765 |
| ATRN     | 20p13    | -0.17244 | 0.000713 | 0.002766 |
| FCRLA    | 1q23.3   | -0.17242 | 0.000714 | 0.002768 |
| DNER     | 2q36.3   | -0.17242 | 0.000714 | 0.002769 |
| ETV1     | 7p21.2   | -0.1724  | 0.000715 | 0.002772 |
| RNF175   | 4q31.3   | -0.17237 | 0.000716 | 0.002777 |
| GZMK     | 5q11.2   | -0.17237 | 0.000716 | 0.002777 |
| LHFPL1   | Xq23     | -0.17237 | 0.000716 | 0.002777 |
| EIF4G2   | 11p15.4  | -0.17236 | 0.000717 | 0.002778 |
| B3GALT2  | 1q31.2   | -0.17236 | 0.000717 | 0.002778 |
| POLR3GL  | 1q21.1   | -0.17235 | 0.000717 | 0.002778 |
| ALG11    | 13q14.3  | 0.172348 | 0.000717 | 0.002779 |
| ALDH1B1  | 9p13.1   | -0.17234 | 0.000718 | 0.00278  |
| CPNE3    | 8q21.3   | -0.17229 | 0.000721 | 0.00279  |
| SLC14A1  | 18q12.3  | -0.17226 | 0.000722 | 0.002795 |
| TM6SF2   | 19p13.11 | -0.17225 | 0.000723 | 0.002796 |
| ELK3     | 12q23.1  | -0.17222 | 0.000724 | 0.002801 |
| TXN      | 9q31.3   | 0.172215 | 0.000724 | 0.002802 |
| ZNF432   | 19q13.41 | 0.172203 | 0.000725 | 0.002804 |
| ARSE     | Xp22.33  | -0.1722  | 0.000725 | 0.002804 |
| MAP11    | 7q22.1   | 0.172193 | 0.000726 | 0.002805 |
| PDE10A   | 6q27     | -0.17219 | 0.000726 | 0.002806 |
| DRD4     | 11p15.5  | 0.172148 | 0.000728 | 0.002813 |
| ARHGFE3  | 3p14.3   | -0.17214 | 0.000728 | 0.002814 |
| ID3      | 1p36.12  | -0.17214 | 0.000728 | 0.002814 |
| FLJ44635 | Xq13.1   | -0.17212 | 0.00073  | 0.002818 |
| TPM1     | 15q22.2  | -0.17209 | 0.000731 | 0.002823 |
| RANBP3   | 19p13.3  | 0.172074 | 0.000732 | 0.002826 |
| LCTL     | 15q22.31 | 0.172045 | 0.000733 | 0.002831 |
| FGD3     | 9q22.31  | -0.17203 | 0.000734 | 0.002834 |
| BMP3     | 4q21.21  | -0.17199 | 0.000736 | 0.002841 |
| WDR18    | 19p13.3  | 0.171956 | 0.000738 | 0.002848 |
| LSG1     | 3q29     | 0.171936 | 0.000739 | 0.002851 |
| TIGD6    | 5q32     | -0.1719  | 0.000741 | 0.002858 |
| CPOX     | 3q11.2   | 0.171897 | 0.000741 | 0.002858 |
| NADK     | 1p36.33  | 0.171888 | 0.000742 | 0.00286  |
| PTPRN    | 2q35     | -0.17188 | 0.000742 | 0.002861 |
| PSPC1    | 13q12.11 | 0.171868 | 0.000743 | 0.002863 |
| SPEG     | 2q35     | -0.17186 | 0.000743 | 0.002864 |
| LMAN1    | 18q21.32 | -0.17184 | 0.000744 | 0.002867 |
| ZMIZ2    | 7p13     | 0.171801 | 0.000746 | 0.002875 |
| TBCK     | 4q24     | -0.1718  | 0.000747 | 0.002875 |
| SNX15    | 11q13.1  | -0.17177 | 0.000748 | 0.002881 |
| KRTAP5-9 | 11q13.4  | 0.171755 | 0.000749 | 0.002883 |
| C1QTNF9B | 13q12.12 | 0.171752 | 0.000749 | 0.002883 |
| FNDC3A   | 13q14.2  | -0.17171 | 0.000752 | 0.002892 |
| NR1H3    | 11p11.2  | -0.1717  | 0.000752 | 0.002893 |
| GOLGA8B  | 15q14    | 0.171629 | 0.000756 | 0.002907 |
| AR       | Xq12     | -0.17163 | 0.000756 | 0.002907 |
| CSTF2    | Xq22.1   | 0.171624 | 0.000756 | 0.002907 |
| WASH3P   | 15q26.3  | 0.171552 | 0.00076  | 0.002922 |
| MAB21L3  | 1p13.1   | -0.17145 | 0.000766 | 0.002943 |
| APCDD1L  | 20q13.32 | -0.17142 | 0.000767 | 0.002948 |
| GDF11    | 12q13.2  | -0.17142 | 0.000767 | 0.002948 |
| KCNH6    | 17q23.3  | -0.17141 | 0.000768 | 0.002948 |
| STYXL1   | 7q11.23  | -0.17141 | 0.000768 | 0.002948 |
| MAML3    | 4q31.1   | -0.17141 | 0.000768 | 0.002948 |
| TMED7    | 5q22.3   | -0.17141 | 0.000768 | 0.002948 |

|         |                 |          |          |          |
|---------|-----------------|----------|----------|----------|
| CRACR2B | 11p15.5         | 0.171358 | 0.000771 | 0.002958 |
| WNT10A  | 2q35            | -0.17135 | 0.000771 | 0.002959 |
| SH2D1A  | Xq25            | -0.17134 | 0.000772 | 0.002962 |
| HYI     | 1p34.2          | -0.17133 | 0.000772 | 0.002962 |
| C3ORF14 | 3p14.2          | -0.17133 | 0.000772 | 0.002962 |
| COA6    | 1q42.2          | 0.171328 | 0.000772 | 0.002962 |
| CHGB    | 20p12.3         | -0.17129 | 0.000774 | 0.002968 |
| TRPM4   | 19q13.33        | 0.171294 | 0.000774 | 0.002968 |
| SETMAR  | 3p26.1          | -0.17129 | 0.000775 | 0.002968 |
| NOS1    | 12q24.22        | -0.17127 | 0.000775 | 0.002971 |
| MKX     | 10p12.1         | -0.17126 | 0.000776 | 0.002973 |
| SH3BP5  | 3p25.1          | -0.17123 | 0.000778 | 0.002979 |
| KCNN1   | 19p13.11        | -0.17123 | 0.000778 | 0.002979 |
| ZC3H3   | 8q24.3          | 0.17121  | 0.000779 | 0.002982 |
| DTX3    | 12q13.3         | -0.17119 | 0.00078  | 0.002986 |
| NSD1    | 5q35.3          | 0.171182 | 0.000781 | 0.002987 |
| VAV1    | 19p13.3         | -0.17116 | 0.000782 | 0.002991 |
| NKAIN4  | 20q13.33        | -0.17115 | 0.000782 | 0.002992 |
| OGDHL   | 10q11.23        | -0.17114 | 0.000783 | 0.002996 |
| CCDC17  | 1p34.1          | 0.171098 | 0.000785 | 0.003003 |
| KLHDC7A | 1p36.13         | -0.17106 | 0.000787 | 0.00301  |
| TIE1    | 1p34.2          | -0.17103 | 0.000789 | 0.003015 |
| LYSMD4  | 15q26.3         | 0.171034 | 0.000789 | 0.003015 |
| PCSK1N  | Xp11.23         | -0.17103 | 0.000789 | 0.003015 |
| ZCCHC10 | 5q31.1          | -0.17101 | 0.00079  | 0.00302  |
| LCP1    | 13q14.13        | -0.17098 | 0.000792 | 0.003026 |
| RNF25   | 2q35            | -0.17094 | 0.000794 | 0.003034 |
| KCNS1   | 20q13.12        | -0.17093 | 0.000795 | 0.003035 |
| ADIPOR1 | 1q32.1          | 0.170919 | 0.000796 | 0.003037 |
| CYP20A1 | 2q33.2          | -0.17092 | 0.000796 | 0.003037 |
| GABRB3  | 15q12           | -0.17091 | 0.000796 | 0.003037 |
| RAB36   | 22q11.23        | 0.1709   | 0.000797 | 0.003039 |
| MROH1   | 8q24.3          | 0.17089  | 0.000797 | 0.003041 |
| TBC1D5  | 3p24.3          | -0.17089 | 0.000797 | 0.003041 |
| RNASEK  | 17p13.1         | -0.17086 | 0.000799 | 0.003046 |
| RALB    | 2q14.2          | -0.1708  | 0.000802 | 0.003058 |
| GEMIN4  | 17p13.3         | 0.170768 | 0.000804 | 0.003065 |
| HSDL1   | 16q24.1         | -0.17076 | 0.000805 | 0.003066 |
| GGH     | 8q12.3          | -0.17075 | 0.000805 | 0.003068 |
| OTOA    | 16p12.2 16p12.2 | -0.17074 | 0.000806 | 0.003069 |
| PCNA    | 20p12.3         | 0.17074  | 0.000806 | 0.003069 |
| TAS2R5  | 7q34            | 0.170692 | 0.000809 | 0.003079 |
| CPNE7   | 16q24.3         | 0.170656 | 0.000811 | 0.003087 |
| MCEE    | 2p13.3          | -0.17063 | 0.000812 | 0.003093 |
| BIN2    | 12q13.13        | -0.1706  | 0.000814 | 0.003097 |
| UBE2Q1  | 1q21.3          | 0.1706   | 0.000814 | 0.003097 |
| SEMA4G  | 10q24.31        | 0.170599 | 0.000814 | 0.003097 |
| ZCCHC8  | 12q24.31        | 0.170588 | 0.000815 | 0.003099 |
| LIMS3   | 2q13            | -0.17058 | 0.000815 | 0.0031   |
| KIF9    | 3p21.31         | 0.170579 | 0.000815 | 0.0031   |
| BCL6B   | 17p13.1         | -0.17056 | 0.000817 | 0.003104 |
| SLC47A1 | 17p11.2         | -0.17054 | 0.000818 | 0.003107 |
| ADAMTS6 | 5q12.3          | -0.17053 | 0.000818 | 0.003109 |
| ABCA8   | 17q24.2         | -0.17053 | 0.000818 | 0.003109 |
| EIF4E3  | 3p13            | -0.17052 | 0.000818 | 0.003109 |
| ALG3    | 3q27.1          | 0.170504 | 0.00082  | 0.003113 |
| FTH1    | 11q12.3         | -0.17049 | 0.00082  | 0.003115 |
| GGT8P   | 2p11.2          | 0.170461 | 0.000822 | 0.003121 |

|            |               |          |          |          |
|------------|---------------|----------|----------|----------|
| DAXX       | 6p21.32       | 0.170435 | 0.000824 | 0.003127 |
| DDX21      | 10q22.1       | 0.170433 | 0.000824 | 0.003127 |
| NUP58      | 13q12.13      | 0.170411 | 0.000825 | 0.003131 |
| TFAP4      | 16p13.3       | 0.1704   | 0.000826 | 0.003133 |
| HCLS1      | 3q13.33       | -0.17039 | 0.000826 | 0.003134 |
| SASH3      | Xq26.1        | -0.17039 | 0.000826 | 0.003134 |
| GTPBP1     | 22q13.1       | 0.170386 | 0.000827 | 0.003134 |
| CNTNAP2    | 7q35-q36.1    | 0.170384 | 0.000827 | 0.003134 |
| PCDHB11    | 5q31.3        | -0.17038 | 0.000827 | 0.003134 |
| ARHGAP25   | 2p13.3        | -0.17038 | 0.000827 | 0.003134 |
| AP1M2      | 19p13.2       | 0.170371 | 0.000827 | 0.003135 |
| HS3ST3A1   | 17p12         | -0.17036 | 0.000828 | 0.003138 |
|            | 6-Mar 5p15.2  | 0.170345 | 0.000829 | 0.00314  |
| SPPL2A     | 15q21.2       | -0.17029 | 0.000832 | 0.003151 |
| ZNF610     | 19q13.41      | -0.17028 | 0.000833 | 0.003154 |
| CTAGE1     | 18q11.2       | -0.17026 | 0.000834 | 0.003158 |
| MAGED1     | Xp11.22       | -0.17023 | 0.000836 | 0.003164 |
| HMG2N2P46  | 15q21.1       | 0.170186 | 0.000839 | 0.003173 |
| HLA-DMA    | 6p21.32       | -0.17018 | 0.000839 | 0.003173 |
| ST7-OT4    | 7q31.2        | 0.170177 | 0.000839 | 0.003173 |
| PTPN23     | 3p21.31       | 0.170175 | 0.000839 | 0.003173 |
| LOC93622   | 4p16.1        | 0.170174 | 0.000839 | 0.003173 |
| CHI3L2     | 1p13.2        | -0.17015 | 0.000841 | 0.003178 |
| GOT1       | 10q24.2       | 0.170141 | 0.000841 | 0.003179 |
| ZNF491     | 19p13.2       | -0.17013 | 0.000842 | 0.003181 |
| HIST1H4A   | 6p22.2        | 0.170122 | 0.000842 | 0.003182 |
| CERS1      | 19p13.11      | -0.17012 | 0.000843 | 0.003183 |
| NOP14      | 4p16.3        | 0.170086 | 0.000845 | 0.00319  |
| DENND2C    | 1p13.2        | -0.17008 | 0.000845 | 0.003191 |
| CAND2      | 3p25.2        | -0.17007 | 0.000846 | 0.003193 |
| RHBDL1     | 16p13.3       | 0.170059 | 0.000846 | 0.003194 |
| NXT2       | Xq23          | -0.17004 | 0.000847 | 0.003197 |
| IGSF6      | 16p12.2       | -0.17    | 0.00085  | 0.003206 |
| ANKRD54    | 22q13.1       | 0.169995 | 0.00085  | 0.003207 |
| CSF1R      | 5q32          | -0.16995 | 0.000853 | 0.003217 |
| DIPK2B     | Xp11.3        | -0.16992 | 0.000855 | 0.003223 |
| SLC16A7    | 12q14.1       | -0.16991 | 0.000855 | 0.003224 |
|            | 9-Mar 12q14.1 | 0.169909 | 0.000855 | 0.003224 |
| ANKRD36BP1 | 1q24.2        | 0.169892 | 0.000856 | 0.003227 |
| GPR68      | 14q32.11      | -0.16987 | 0.000858 | 0.003232 |
| CD164      | 6q21          | -0.16985 | 0.000859 | 0.003236 |
| PIK3CG     | 7q22.3        | -0.16985 | 0.000859 | 0.003236 |
| EHD2       | 19q13.33      | -0.16982 | 0.000861 | 0.003243 |
| UNC93B1    | 11q13.2       | 0.169791 | 0.000863 | 0.003248 |
| TTC1       | 5q33.3        | -0.16976 | 0.000864 | 0.003254 |
| ACSBG2     | 19p13.3       | 0.169752 | 0.000865 | 0.003256 |
| MAP2K7     | 19p13.2       | 0.169698 | 0.000868 | 0.003268 |
| PRR23A     | 3q23          | 0.169685 | 0.000869 | 0.00327  |
| DNAAF2     | 14q21.3       | -0.16968 | 0.00087  | 0.003271 |
| MGARP      | 4q31.1        | -0.16966 | 0.000871 | 0.003274 |
| ZBTB24     | 6q21          | 0.169619 | 0.000873 | 0.003284 |
| TEX10      | 9q31.1        | 0.169587 | 0.000875 | 0.003291 |
| ACTR2      | 2p14          | -0.16955 | 0.000878 | 0.003299 |
| CDKL5      | Xp22.13       | -0.16955 | 0.000878 | 0.003299 |
| POLR2J4    | 7p13          | 0.169537 | 0.000878 | 0.003301 |
| RAI14      | 5p13.2        | -0.16953 | 0.000879 | 0.003301 |
| PDC        | 1q31.1        | 0.169531 | 0.000879 | 0.003301 |
| SLC25A10   | 17q25.3       | 0.169526 | 0.000879 | 0.003301 |

|           |              |          |          |          |
|-----------|--------------|----------|----------|----------|
| ZNF653    | 19p13.2      | 0.169525 | 0.000879 | 0.003301 |
| ADGRA2    | 8p11.23      | -0.16952 | 0.00088  | 0.003302 |
| TRAT1     | 3q13.13      | -0.1695  | 0.000881 | 0.003305 |
| COL24A1   | 1p22.3       | -0.16949 | 0.000881 | 0.003308 |
| ZNF568    | 19q13.12     | -0.16945 | 0.000884 | 0.003316 |
| KCNK1     | 1q42.2       | 0.169448 | 0.000884 | 0.003316 |
| TCF15     | 20p13        | -0.16943 | 0.000885 | 0.00332  |
| CTSH      | 15q25.1      | -0.16942 | 0.000886 | 0.00332  |
| APOB      | 2p24.1       | -0.16941 | 0.000887 | 0.003324 |
| MTCP1     | Xq28         | 0.169352 | 0.00089  | 0.003336 |
| COX11     | 17q22        | -0.16928 | 0.000895 | 0.003353 |
| SLC7A4    | 22q11.21     | -0.16928 | 0.000895 | 0.003353 |
| TBPL1     | 6q23.2       | -0.16927 | 0.000895 | 0.003354 |
| FDCSP     | 4q13.3 4q13  | -0.16922 | 0.000898 | 0.003365 |
| PNPLA4    | Xp22.31      | -0.16919 | 0.0009   | 0.003371 |
| SPINK6    | 5q32         | -0.16919 | 0.000901 | 0.003372 |
| PPIH      | 1p34.2       | 0.169117 | 0.000905 | 0.003388 |
| HSPA12A   | 10q25.3      | -0.16909 | 0.000907 | 0.003393 |
| HIST1H2AB | 6p22.2       | 0.169093 | 0.000907 | 0.003393 |
| EEFSEC    | 3q21.3       | 0.169057 | 0.000909 | 0.003401 |
| TMPPE     | 3p22.3       | 0.169049 | 0.00091  | 0.003402 |
| SPOCK2    | 10q22.1      | -0.16903 | 0.000911 | 0.003405 |
| CLEC5A    | 7q34         | -0.169   | 0.000913 | 0.003414 |
| CCDC154   | 16p13.3      | 0.168961 | 0.000915 | 0.003422 |
| NTRK2     | 9q21.33      | -0.16896 | 0.000916 | 0.003422 |
| SUMF2     | 7p11.2       | -0.16895 | 0.000916 | 0.003423 |
| GSK3A     | 19q13.2      | 0.16891  | 0.000919 | 0.003432 |
| SHISA3    | 4p13         | -0.16891 | 0.000919 | 0.003432 |
| TAPBPL    | 12p13.31     | -0.16888 | 0.00092  | 0.003438 |
| RAB2A     | 8q12.1-q12.2 | -0.16887 | 0.000921 | 0.00344  |
| RBPM5     | 8p12         | -0.16885 | 0.000922 | 0.003444 |
| EIF2D     | 1q32.1       | 0.168849 | 0.000923 | 0.003444 |
| MMRN1     | 4q22.1       | -0.16885 | 0.000923 | 0.003444 |
| CPLX3     | 15q24.1      | 0.168844 | 0.000923 | 0.003444 |
| ZNF280D   | 15q21.3      | -0.16883 | 0.000924 | 0.003446 |
| C20ORF204 | 20q13.33     | 0.168793 | 0.000926 | 0.003455 |
| FLRT1     | 11q13.1      | 0.168766 | 0.000928 | 0.003461 |
| TTN       | 2q31.2       | 0.168753 | 0.000929 | 0.003464 |
| CSF1      | 1p13.3       | -0.16873 | 0.000931 | 0.00347  |
| DOCK5     | 8p21.2       | 0.168721 | 0.000931 | 0.00347  |
| FPR3      | 19q13.41     | -0.16872 | 0.000931 | 0.00347  |
| HOOK3     | 8p11.21      | -0.16871 | 0.000932 | 0.003471 |
| MEX3B     | 15q25.2      | -0.1687  | 0.000933 | 0.003475 |
| CD14      | 5q31.3       | -0.16868 | 0.000934 | 0.003479 |
| C1QA      | 1p36.12      | -0.16864 | 0.000936 | 0.003487 |
| CCDC137   | 17q25.3      | 0.168614 | 0.000938 | 0.003493 |
| ARHGDIB   | 12p12.3      | -0.16859 | 0.00094  | 0.003498 |
| SIGLEC7   | 19q13.41     | -0.16857 | 0.000941 | 0.003501 |
| TSPYL2    | Xp11.22      | -0.16856 | 0.000942 | 0.003505 |
| PAFAH1B1  | 17p13.3      | -0.16855 | 0.000942 | 0.003506 |
| HCAR1     | 12q24.31     | -0.16853 | 0.000944 | 0.003511 |
| INPP5K    | 17p13.3      | -0.16852 | 0.000944 | 0.003512 |
| CKMT1A    | 15q15.3      | 0.168515 | 0.000945 | 0.003512 |
| MAX       | 14q23.3      | -0.16851 | 0.000945 | 0.003512 |
| RRAS      | 19q13.33     | -0.16848 | 0.000947 | 0.003519 |
| NFKBIA    | 14q13.2      | -0.16846 | 0.000948 | 0.003524 |
| RNF144B   | 6p22.3       | -0.16842 | 0.000951 | 0.003534 |
| LAMB4     | 7q31.1       | -0.16841 | 0.000952 | 0.003536 |

|           |               |          |          |          |
|-----------|---------------|----------|----------|----------|
| TMPRSS13  | 11q23.3       | -0.16839 | 0.000953 | 0.00354  |
| SVEP1     | 9q31.3        | -0.16839 | 0.000953 | 0.00354  |
| STYX      | 14q22.1       | -0.16837 | 0.000954 | 0.003544 |
| HMG1P1    | 20q13.31      | 0.168364 | 0.000955 | 0.003545 |
| CLEC4G    | 19p13.2       | -0.16835 | 0.000956 | 0.003549 |
| TRIM4     | 7q22.1        | -0.16833 | 0.000957 | 0.003552 |
| TMEM52    | 1p36.33       | 0.168303 | 0.000959 | 0.003558 |
| ENPP4     | 6p21.1        | -0.16829 | 0.00096  | 0.003562 |
| FAM161A   | 2p15          | 0.168272 | 0.000961 | 0.003565 |
| ZNF839    | 14q32.31      | 0.168259 | 0.000962 | 0.003566 |
| IRX6      | 16q12.2       | -0.16826 | 0.000962 | 0.003566 |
| SERPINE1  | 7q22.1        | -0.16826 | 0.000962 | 0.003566 |
| FBXL4     | 6q16.1-q16.2  | -0.16826 | 0.000962 | 0.003566 |
| MOBP      | 3p22.1        | -0.16823 | 0.000964 | 0.003572 |
| FMO1      | 1q24.3        | -0.16823 | 0.000964 | 0.003572 |
| KLF14     | 7q32.2        | -0.16822 | 0.000965 | 0.003573 |
| TMEM252   | 9q21.11       | -0.16821 | 0.000966 | 0.003576 |
| CD300A    | 17q25.1       | -0.1682  | 0.000966 | 0.003577 |
| MMP7      | 11q22.2       | -0.16819 | 0.000967 | 0.003578 |
| SNN       | 16p13.13      | -0.16818 | 0.000968 | 0.003582 |
| ARL17A    | 17q21.31      | 0.168167 | 0.000968 | 0.003584 |
| C15ORF40  | 15q25.2       | -0.16816 | 0.000969 | 0.003584 |
| ARL6IP1   | 16p12.3       | 0.168159 | 0.000969 | 0.003584 |
| QTRT2     | 3q13.31       | 0.168116 | 0.000972 | 0.003594 |
| OSGEPL1   | 2q32.2        | -0.16806 | 0.000976 | 0.003609 |
| MYO5C     | 15q21.2       | 0.168053 | 0.000976 | 0.003609 |
| SLC25A25  | 9q34.11       | 0.16803  | 0.000978 | 0.003615 |
| MYO1A     | 12q13.3       | 0.168017 | 0.000979 | 0.003617 |
| C1QB      | 1p36.12       | -0.16801 | 0.000979 | 0.003618 |
| ICAM1     | 19p13.2       | -0.168   | 0.00098  | 0.00362  |
| PLD5      | 1q43          | -0.16799 | 0.000981 | 0.003623 |
| ZBED3     | 5q13.3        | 0.167954 | 0.000983 | 0.003631 |
| BACE1     | 11q23.3       | -0.16793 | 0.000985 | 0.003636 |
| NDUFV1    | 11q13.2       | 0.167925 | 0.000985 | 0.003637 |
| IGSF22    | 11p15.1       | -0.16792 | 0.000986 | 0.003638 |
| FAM217B   | 20q13.33      | -0.1679  | 0.000987 | 0.003641 |
| CDC42     | 1p36.12       | -0.16787 | 0.000989 | 0.003649 |
| KDM5C     | Xp11.22       | 0.167861 | 0.00099  | 0.003651 |
| TMEM159   | 16p12.3       | -0.16783 | 0.000992 | 0.003658 |
| SRPX      | Xp11.4        | -0.16781 | 0.000993 | 0.003663 |
| HIGD1A    | 3p22.1        | -0.16778 | 0.000995 | 0.003669 |
| HIST1H3H  | 6p22.1        | 0.167762 | 0.000997 | 0.003674 |
| HEXA-AS1  | 15q23         | -0.16775 | 0.000997 | 0.003674 |
| GTF2IP1   | 7q11.23       | -0.16775 | 0.000997 | 0.003674 |
| TUBB8     | 10p15.3       | 0.167752 | 0.000997 | 0.003674 |
| ABCA2     | 9q34.3        | 0.167727 | 0.000999 | 0.00368  |
| COMMD10   | 5q23.1        | -0.16771 | 0.001    | 0.003683 |
| TMEM126A  | 11q14.1       | -0.16769 | 0.001002 | 0.003689 |
| LRRC74A   | 14q24.3       | -0.16763 | 0.001006 | 0.003702 |
| PACS1     | 11q13.1-q13.2 | -0.16759 | 0.001009 | 0.003713 |
| CD300LG   | 17q21.31      | -0.16757 | 0.00101  | 0.003719 |
| ANXA7     | 10q22.2       | -0.16756 | 0.001011 | 0.00372  |
| SLC2A10   | 20q13.12      | -0.16753 | 0.001013 | 0.003727 |
| CAPN13    | 2p23.1        | -0.16752 | 0.001014 | 0.003729 |
| ALKAL1    | 8q11.23       | -0.16749 | 0.001016 | 0.003736 |
| DAD1      | 14q11.2       | -0.16743 | 0.001021 | 0.003752 |
| HIST1H2AL | 6p22.1        | 0.167409 | 0.001022 | 0.003756 |
| GPR141    | 7p14.1        | -0.16736 | 0.001025 | 0.003767 |

|           |               |          |          |          |
|-----------|---------------|----------|----------|----------|
| THOC3     | 5q35.2        | 0.167324 | 0.001028 | 0.003777 |
| KCTD13    | 16p11.2       | 0.167284 | 0.001031 | 0.003787 |
| GRHL3     | 1p36.11       | 0.167255 | 0.001033 | 0.003794 |
| METTL25   | 12q21.31      | -0.16723 | 0.001035 | 0.0038   |
| C1ORF216  | 1p34.3        | -0.16722 | 0.001035 | 0.003802 |
| RFK       | 9q21.13       | -0.16721 | 0.001037 | 0.003805 |
| ZNF385A   | 12q13.13      | -0.16718 | 0.001039 | 0.003812 |
| BMX       | Xp22.2        | -0.16716 | 0.00104  | 0.003815 |
| HIST1H3F  | 6p22.2        | 0.167149 | 0.001041 | 0.003819 |
| CLC       | 19q13.2       | -0.16713 | 0.001042 | 0.003824 |
| TMTC3     | 12q21.32      | -0.16708 | 0.001045 | 0.003835 |
| NXPH2     | 2q22.1        | -0.16706 | 0.001047 | 0.003841 |
| ADAP2     | 17q11.2       | -0.16705 | 0.001048 | 0.003841 |
| GHRLOS    | 3p25.3        | 0.16699  | 0.001052 | 0.003858 |
| RBM24     | 6p22.3        | -0.16698 | 0.001053 | 0.00386  |
| SLC9B1    | 4q24          | -0.16695 | 0.001056 | 0.003869 |
| TMED10    | 14q24.3       | -0.16694 | 0.001056 | 0.003869 |
| PPP3CC    | 8p21.3        | -0.16694 | 0.001056 | 0.003869 |
| ZDHHC6    | 10q25.2       | 0.166936 | 0.001056 | 0.003869 |
| SLC2A3    | 12p13.31      | -0.16694 | 0.001056 | 0.003869 |
| SAE1      | 19q13.32      | 0.16692  | 0.001058 | 0.003872 |
| C2ORF76   | 2q14.2        | -0.16689 | 0.00106  | 0.00388  |
| GLP2R     | 17p13.1       | -0.16687 | 0.001061 | 0.003883 |
| PITPNM3   | 17p13.2-p13.1 | 0.16686  | 0.001062 | 0.003886 |
| HLA-DQA2  | 6p21.32       | -0.16685 | 0.001063 | 0.00389  |
| CHMP4B    | 20q11.22      | -0.16684 | 0.001063 | 0.00389  |
| CHST15    | 10q26.13      | -0.16679 | 0.001068 | 0.003904 |
| TMEM218   | 11q24.2       | -0.16677 | 0.001069 | 0.003909 |
| CBLN4     | 20q13.2       | -0.16677 | 0.001069 | 0.003909 |
| GABPA     | 21q21.3       | -0.16676 | 0.00107  | 0.00391  |
| CSNK2B    | 6p21.33       | 0.166722 | 0.001072 | 0.003919 |
| LINC02693 | 17p11.2       | -0.1667  | 0.001074 | 0.003924 |
| UBQLN2    | Xp11.21       | -0.1667  | 0.001074 | 0.003925 |
| MIIP      | 1p36.22       | 0.166695 | 0.001075 | 0.003925 |
| APOE      | 19q13.32      | -0.16665 | 0.001078 | 0.003936 |
| ODAM      | 4q13.3        | -0.16664 | 0.001079 | 0.003938 |
| OSCP1     | 1p34.3        | -0.16663 | 0.001079 | 0.003939 |
| PWWP3A    | 19p13.3       | 0.166606 | 0.001081 | 0.003946 |
| CLCN2     | 3q27.1        | 0.166601 | 0.001082 | 0.003947 |
| HOXA9     | 7p15.2        | 0.166536 | 0.001087 | 0.003965 |
| C1QC      | 1p36.12       | -0.1665  | 0.001089 | 0.003973 |
| VGLL2     | 6q22.1        | -0.16648 | 0.001091 | 0.003978 |
| NAA25     | 12q24.13      | 0.166441 | 0.001094 | 0.003989 |
| SPATA4    | 4q34.2        | -0.1664  | 0.001097 | 0.004    |
| C2ORF72   | 2q37.1        | 0.166394 | 0.001097 | 0.004001 |
| SLC8A3    | 14q24.2       | -0.16633 | 0.001103 | 0.004019 |
| TIMP4     | 3p25.2        | -0.16629 | 0.001106 | 0.004029 |
| ADCK5     | 8q24.3        | 0.166259 | 0.001108 | 0.004036 |
| NKD1      | 16q12.1       | -0.16624 | 0.001109 | 0.00404  |
| LARP4     | 12q13.12      | 0.166226 | 0.001111 | 0.004044 |
| MAML1     | 5q35.3        | 0.166194 | 0.001113 | 0.004053 |
| PDCD1LG2  | 9p24.1        | -0.16619 | 0.001114 | 0.004054 |
| ZSCAN12P1 | 6p22.1        | 0.166175 | 0.001114 | 0.004057 |
| RGS2      | 1q31.2        | -0.16617 | 0.001115 | 0.004057 |
| RUNX1     | 21q22.12      | -0.16615 | 0.001116 | 0.004061 |
| PFN2      | 3q25.1        | -0.16614 | 0.001117 | 0.004065 |
| GPX1      | 3p21.31       | -0.16611 | 0.001119 | 0.004071 |
| SF3B6     | 2p23.3        | -0.16611 | 0.00112  | 0.004072 |

|           |                     |          |          |          |
|-----------|---------------------|----------|----------|----------|
| RELB      | 19q13.32            | -0.16611 | 0.00112  | 0.004072 |
| PRRG2     | 19q13.33            | -0.1661  | 0.00112  | 0.004073 |
| CHST1     | 11p11.2             | -0.16608 | 0.001122 | 0.004078 |
| FBXL16    | 16p13.3             | 0.166067 | 0.001123 | 0.004081 |
| NXNL1     | 19p13.11            | -0.16605 | 0.001125 | 0.004086 |
| STXBP2    | 19p13.2             | 0.165977 | 0.00113  | 0.004105 |
| TLR8      | Xp22.2              | -0.16592 | 0.001134 | 0.00412  |
| EIF4EBP3  | 5q31.3              | -0.16589 | 0.001137 | 0.004128 |
| MPEG1     | 11q12.1             | -0.16588 | 0.001138 | 0.004131 |
| CCDC6     | 10q21.2             | 0.165869 | 0.001139 | 0.004133 |
| CPA3      | 3q24                | -0.16583 | 0.001142 | 0.004145 |
| NSMCE2    | 8q24.13             | -0.16582 | 0.001142 | 0.004145 |
| ACTG2     | 2p13.1              | -0.16574 | 0.001149 | 0.004169 |
| METTL23   | 17q25.1             | -0.16573 | 0.00115  | 0.004171 |
| CHPF2     | 7q36.1              | -0.16572 | 0.00115  | 0.004172 |
| SLC25A38  | 3p22.1              | -0.16571 | 0.001151 | 0.004175 |
| RASA3     | 13q34               | -0.16568 | 0.001154 | 0.004184 |
| DNMT3B    | 20q11.21            | 0.165674 | 0.001154 | 0.004184 |
| ADIPOQ    | 3q27.3              | -0.16567 | 0.001155 | 0.004185 |
| TMEM99    | 17q21.2             | -0.16566 | 0.001155 | 0.004186 |
| DCLK2     | 4q31.23-q31.3       | -0.16566 | 0.001156 | 0.004186 |
| FOLR1     | 11q13.4             | -0.16563 | 0.001158 | 0.004194 |
| MRC2      | 17q23.2             | -0.16555 | 0.001164 | 0.004215 |
| TMSB15B   | Xq22.2              | -0.16554 | 0.001165 | 0.004218 |
| TRMT11    | 6q22.32             | 0.165484 | 0.00117  | 0.004234 |
| CAMK4     | 5q22.1              | -0.16548 | 0.00117  | 0.004234 |
| RNASE1    | 14q11.2             | -0.16548 | 0.00117  | 0.004234 |
| TP53RK    | 20q13.12            | -0.16548 | 0.00117  | 0.004234 |
| STX11     | 6q24.2              | -0.16548 | 0.00117  | 0.004234 |
| WDR37     | 10p15.3             | 0.165464 | 0.001171 | 0.004237 |
| TDRP      | 8p23.3              | -0.16543 | 0.001174 | 0.004245 |
| ASH1L     | 1q22                | 0.165432 | 0.001174 | 0.004245 |
| SYNGAP1   | 6p21.32             | 0.165424 | 0.001175 | 0.004246 |
| MGC16025  | 2q37.3              | 0.165408 | 0.001176 | 0.00425  |
| ATP2B4    | 1q32.1              | -0.1654  | 0.001177 | 0.004252 |
| MFSD2A    | 1p34.2              | 0.165362 | 0.00118  | 0.004262 |
| HOXB9     | 17q21.32            | 0.165355 | 0.00118  | 0.004264 |
| TVP23B    | 17p11.2             | -0.16535 | 0.001181 | 0.004265 |
| RSL24D1   | 15q21.3             | -0.16534 | 0.001182 | 0.004267 |
| CCDC158   | 4q21.1              | -0.16533 | 0.001183 | 0.00427  |
| GTPBP6    | Xp22.33 and Yp11.31 | 0.165307 | 0.001184 | 0.004275 |
| XRCC5     | 2q35                | -0.1653  | 0.001184 | 0.004275 |
| SLU7      | 5q33.3              | -0.16529 | 0.001185 | 0.004277 |
| CRTAM     | 11q24.1             | -0.16528 | 0.001186 | 0.004279 |
| TFIP11    | 22q12.1             | -0.16528 | 0.001186 | 0.004279 |
| IL7R      | 5p13.2              | -0.16528 | 0.001186 | 0.004279 |
| SLC6A2    | 16q12.2             | -0.16527 | 0.001187 | 0.00428  |
| ADAM12    | 10q26.2             | -0.16527 | 0.001187 | 0.00428  |
| KLF9      | 9q21.12             | -0.16525 | 0.001189 | 0.004287 |
| TMEM65    | 8q24.13             | -0.16523 | 0.001191 | 0.004291 |
| SLK       | 10q24.33-q25.1      | 0.165212 | 0.001192 | 0.004296 |
| KATNAL1   | 13q12.3             | -0.16512 | 0.0012   | 0.004323 |
| DCLRE1A   | 10q25.3             | 0.16511  | 0.001201 | 0.004325 |
| RPL23AP82 | 22q13.33            | -0.1651  | 0.001201 | 0.004327 |
| TM4SF19   | 3q29                | -0.16509 | 0.001203 | 0.00433  |
| COASY     | 17q21.2             | 0.165052 | 0.001206 | 0.00434  |
| KIAA1191  | 5q35.2              | -0.16502 | 0.001208 | 0.004349 |
| CELSR2    | 1p13.3              | 0.165013 | 0.001209 | 0.00435  |

|             |          |          |          |          |
|-------------|----------|----------|----------|----------|
| SMARCD2     | 17q23.3  | 0.164995 | 0.00121  | 0.004355 |
| CGB3        | 19q13.33 | -0.16499 | 0.001211 | 0.004355 |
| ETV3        | 1q23.1   | 0.164985 | 0.001211 | 0.004356 |
| SNRNP27     | 2p13.3   | -0.16497 | 0.001212 | 0.00436  |
| DHFR2       | 3q11.2   | -0.16492 | 0.001217 | 0.004376 |
| FADS2       | 11q12.2  | -0.16487 | 0.001221 | 0.004389 |
| C19ORF54    | 19q13.2  | 0.164863 | 0.001221 | 0.00439  |
| RENBP       | Xq28     | -0.16486 | 0.001222 | 0.00439  |
| HLA-DRB5    | 6p21.32  | -0.16483 | 0.001224 | 0.004398 |
| ATP6V1G2    | 6p21.33  | -0.16483 | 0.001225 | 0.004399 |
| GLCE        | 15q23    | -0.16482 | 0.001225 | 0.004399 |
| ASGR2       | 17p13.1  | -0.16477 | 0.001229 | 0.004415 |
| FCSK        | 16q22.1  | 0.164692 | 0.001236 | 0.004438 |
| NUDT15      | 13q14.2  | 0.164638 | 0.001241 | 0.004454 |
| BTN2A2      | 6p22.2   | -0.16463 | 0.001241 | 0.004455 |
| P4HA2       | 5q31.1   | -0.16462 | 0.001242 | 0.004458 |
| MUC15       | 11p14.2  | -0.1646  | 0.001244 | 0.004462 |
| MARVELD1    | 10q24.2  | -0.16459 | 0.001245 | 0.004465 |
| ANKLE2      | 12q24.33 | 0.164522 | 0.001251 | 0.004486 |
| ZNF225      | 19q13.31 | -0.1645  | 0.001252 | 0.004491 |
| TAGAP       | 6q25.3   | -0.1645  | 0.001253 | 0.004493 |
| LINC00173   | 12q24.22 | 0.164479 | 0.001255 | 0.004497 |
| SERP2       | 13q14.11 | -0.16447 | 0.001255 | 0.004498 |
| ABHD17B     | 9q21.13  | -0.16447 | 0.001256 | 0.004498 |
| ULK3        | 15q24.1  | 0.164468 | 0.001256 | 0.004498 |
| PARD6G      | 18q23    | -0.16447 | 0.001256 | 0.004498 |
| GHRL        | 3p25.3   | -0.16442 | 0.001259 | 0.004511 |
| ELF2        | 4q31.1   | -0.16442 | 0.00126  | 0.004512 |
| SH3GLB2     | 9q34.11  | 0.164387 | 0.001263 | 0.00452  |
| SPATA20     | 17q21.33 | -0.16436 | 0.001265 | 0.004527 |
| IL21R       | 16p12.1  | -0.16436 | 0.001265 | 0.004527 |
| RGPD6       | 2q13     | 0.164356 | 0.001265 | 0.004527 |
| ZNF304      | 19q13.43 | -0.16434 | 0.001266 | 0.00453  |
| TCAIM       | 3p21.31  | -0.16434 | 0.001267 | 0.004531 |
| BEX3        | Xq22.2   | -0.16434 | 0.001267 | 0.004532 |
| PCDHGB4     | 5q31.3   | -0.16429 | 0.001272 | 0.004546 |
| SLC29A4     | 7p22.1   | -0.16426 | 0.001274 | 0.004555 |
| RECQL       | 12p12.1  | -0.16425 | 0.001274 | 0.004555 |
| WNT2B       | 1p13.2   | -0.16423 | 0.001276 | 0.004561 |
| UCN         | 2p23.3   | 0.164215 | 0.001278 | 0.004565 |
| RUSC2       | 9p13.3   | -0.1642  | 0.001279 | 0.004569 |
| DNAJC28     | 21q22.11 | -0.16419 | 0.00128  | 0.004573 |
| AQP7P1      | 9q13     | -0.16416 | 0.001283 | 0.004581 |
| CRPPA       | 7p21.2   | -0.16416 | 0.001283 | 0.004581 |
| CD8B        | 2p11.2   | -0.16415 | 0.001283 | 0.004581 |
| CRHR1       | 17q21.31 | -0.16415 | 0.001284 | 0.004581 |
| M6PR        | 12p13.31 | -0.16415 | 0.001284 | 0.004581 |
| EVA1B       | 1p34.3   | -0.16414 | 0.001284 | 0.004582 |
| CHM         | Xq21.2   | -0.16413 | 0.001285 | 0.004585 |
| PRNP        | 20p13    | -0.16412 | 0.001286 | 0.004587 |
| OMP         | 11q13.5  | 0.16411  | 0.001287 | 0.00459  |
| CXCR4       | 2q22.1   | -0.1641  | 0.001288 | 0.004592 |
| GOLGA1      | 9q33.3   | 0.164092 | 0.001289 | 0.004594 |
| THEM4       | 1q21.3   | 0.164042 | 0.001293 | 0.004609 |
| FECH        | 18q21.31 | -0.16396 | 0.001301 | 0.004636 |
| CNTROB      | 17p13.1  | 0.163923 | 0.001304 | 0.004646 |
| HEPN1       | 11q24.2  | -0.1639  | 0.001306 | 0.004651 |
| N4BP2L2-IT2 | 13q13.1  | 0.1639   | 0.001306 | 0.004651 |



|               |                 |          |          |          |
|---------------|-----------------|----------|----------|----------|
| CORT          | 1p36.22         | 0.163855 | 0.00131  | 0.004665 |
| APOO          | Xp22.11         | 0.163795 | 0.001316 | 0.004684 |
| SREK1IP1      | 5q12.3          | -0.16379 | 0.001316 | 0.004685 |
| B3GALNT1      | 3q26.1          | -0.16378 | 0.001317 | 0.004688 |
| VPS4B         | 18q21.33        | -0.16372 | 0.001323 | 0.004706 |
| NCKAP1        | 2q32.1          | -0.16371 | 0.001323 | 0.004709 |
| CNIH4         | 1q42.11         | 0.163702 | 0.001324 | 0.00471  |
| WNT11         | 11q13.5         | -0.16369 | 0.001325 | 0.004714 |
| STPG2         | 4q22.3-q23      | -0.16367 | 0.001327 | 0.004718 |
| ZNF621        | 3p22.1          | 0.163664 | 0.001327 | 0.00472  |
| NEK6          | 9q33.3          | 0.163634 | 0.00133  | 0.004729 |
| SPIC          | 12q23.2         | -0.16362 | 0.001332 | 0.004733 |
| PRSS16        | 6p22.1          | 0.163606 | 0.001333 | 0.004736 |
| BBOF1         | 14q24.3         | -0.1636  | 0.001334 | 0.004738 |
| TNFRSF11A     | 18q21.33        | 0.163593 | 0.001334 | 0.004739 |
| PCDHGB7       | 5q31.3          | -0.16356 | 0.001337 | 0.004747 |
| CCDC114       | 19q13.33        | 0.163502 | 0.001342 | 0.004767 |
| KIF1B         | 1p36.22         | 0.163484 | 0.001344 | 0.004772 |
| PMS2P3        | 7q11.23         | 0.163476 | 0.001345 | 0.004774 |
| STAMBP        | 2p13.1          | -0.16346 | 0.001347 | 0.004779 |
| ZGLP1         | 19p13.2         | 0.163421 | 0.00135  | 0.00479  |
| CD69          | 12p13.31        | -0.16341 | 0.001351 | 0.004792 |
| RHOT1         | 17q11.2         | -0.16339 | 0.001352 | 0.004797 |
| HS3ST2        | 16p12.2         | -0.16338 | 0.001354 | 0.004802 |
| PLCXD3        | 5p13.1          | -0.16337 | 0.001354 | 0.004803 |
| DDO           | 6q21            | -0.16331 | 0.00136  | 0.004823 |
| ZBED8         | 5q33.3          | -0.16328 | 0.001363 | 0.00483  |
| FATE1         | Xq28            | -0.16322 | 0.001369 | 0.00485  |
| ZCWPW1        | 7q22.1          | -0.16322 | 0.001369 | 0.00485  |
| SNAPC1        | 14q23.2         | -0.1632  | 0.00137  | 0.004854 |
| METTL6        | 3p25.1          | -0.16317 | 0.001374 | 0.004866 |
| NEK4          | 3p21.1          | 0.163162 | 0.001374 | 0.004867 |
| MYADM         | 19q13.42        | -0.16314 | 0.001377 | 0.004874 |
| DIRAS1        | 19p13.3         | -0.1631  | 0.00138  | 0.004886 |
| TIMM10B       | 11p15.4         | -0.16308 | 0.001382 | 0.004891 |
| BTBD1         | 15q25.2         | -0.16308 | 0.001382 | 0.004891 |
| LGALS1        | 2p14            | -0.16307 | 0.001383 | 0.004894 |
| SPAG8         | 9p13.3          | 0.163058 | 0.001384 | 0.004897 |
| STOML1        | 15q24.1         | -0.16305 | 0.001385 | 0.004898 |
| SUSD1         | 9q31.3-q32      | -0.16305 | 0.001385 | 0.004898 |
| PLIN5         | 19p13.3         | 0.163035 | 0.001386 | 0.004902 |
| STON1-GTF2A1L | 2p16.3          | -0.16303 | 0.001387 | 0.004904 |
| ELMO3         | 16q22.1         | 0.163012 | 0.001389 | 0.004908 |
| PCDHGA9       | 5q31.3          | -0.16295 | 0.001394 | 0.004927 |
| GCNT3         | 15q22.2         | 0.162924 | 0.001397 | 0.004936 |
| HIST1H2BJ     | 6p22.1          | 0.16291  | 0.001398 | 0.00494  |
| SHLD2P1       | 10q11.22        | 0.162903 | 0.001399 | 0.004942 |
| SUDS3         | 12q24.23        | 0.162899 | 0.001399 | 0.004942 |
| RAB5C         | 17q21.2         | -0.16287 | 0.001402 | 0.004951 |
| SMC6          | 2p24.2          | 0.162844 | 0.001405 | 0.004959 |
| TTC39C        | 18q11.2         | -0.16283 | 0.001406 | 0.004962 |
| SCNN1D        | 1p36.33         | 0.16279  | 0.00141  | 0.004976 |
| TMEM132B      | 12q24.31-q24.32 | -0.16279 | 0.00141  | 0.004976 |
| SELENOS       | 15q26.3         | -0.16278 | 0.001411 | 0.004977 |
| KIAA1549      | 7q34            | 0.162775 | 0.001411 | 0.004979 |
| ACAA2         | 18q21.1         | -0.16277 | 0.001412 | 0.004981 |
| TMEM37        | 2q14.2          | -0.16276 | 0.001413 | 0.004981 |
| HTR4          | 5q32            | -0.1627  | 0.001419 | 0.005002 |

|          |               |          |          |          |
|----------|---------------|----------|----------|----------|
| SDCBP    | 8q12.1        | -0.1627  | 0.001419 | 0.005002 |
| EMB      | 5q11.1        | -0.16269 | 0.001419 | 0.005002 |
| BUD13    | 11q23.3       | 0.162688 | 0.00142  | 0.005003 |
| PCDH15   | 10q21.1       | -0.16268 | 0.001421 | 0.005006 |
| PDGFB    | 22q13.1       | -0.16267 | 0.001421 | 0.005006 |
| NHEJ1    | 2q35          | -0.16265 | 0.001423 | 0.005011 |
| PLIN4    | 19p13.3       | -0.16265 | 0.001423 | 0.005011 |
| NOTUM    | 17q25.3       | -0.16265 | 0.001424 | 0.005012 |
| RAB6B    | 3q22.1        | -0.16263 | 0.001425 | 0.005016 |
| DUS1L    | 17q25.3       | 0.16263  | 0.001426 | 0.005017 |
| HIST1H4J | 6p22.1        | -0.16259 | 0.00143  | 0.00503  |
| TVP23A   | 16p13.13      | 0.162529 | 0.001436 | 0.00505  |
| TMEM185A | Xq28          | -0.16253 | 0.001436 | 0.00505  |
| FAM238C  | 10p12.1       | 0.162499 | 0.001438 | 0.005058 |
| NBPF7    | 1p12          | 0.162491 | 0.001439 | 0.00506  |
| ASTN2    | 9q33.1        | -0.16249 | 0.001439 | 0.00506  |
| FBLIM1   | 1p36.21       | -0.16248 | 0.00144  | 0.005062 |
| TRAPPC3L | 6q22.1        | -0.16247 | 0.001441 | 0.005064 |
| P2RY10   | Xq21.1        | -0.16245 | 0.001443 | 0.005071 |
| TMEM81   | 1q32.1        | 0.162442 | 0.001444 | 0.005073 |
| TMEM14C  | 6p24.2        | -0.16242 | 0.001446 | 0.00508  |
| SRRM3    | 7q11.23       | -0.1624  | 0.001449 | 0.005087 |
| CNPPD1   | 2q35          | -0.16239 | 0.001449 | 0.005089 |
| CIAO3    | 16p13.3       | 0.16238  | 0.00145  | 0.005091 |
| SMARCE1  | 17q21.2       | -0.16235 | 0.001453 | 0.005099 |
| ZNF410   | 14q24.3       | -0.16235 | 0.001453 | 0.005099 |
| PKHD1L1  | 8q23.1-q23.2  | -0.16234 | 0.001455 | 0.005104 |
| JAML     | 11q23.3       | -0.16228 | 0.00146  | 0.005121 |
| ITGA2B   | 17q21.31      | 0.162281 | 0.00146  | 0.005121 |
| CD3E     | 11q23.3       | -0.16226 | 0.001463 | 0.005129 |
| ASTN1    | 1q25.2        | -0.16225 | 0.001463 | 0.00513  |
| PPP1R3B  | 8p23.1        | -0.16223 | 0.001465 | 0.005136 |
| MARK4    | 19q13.32      | -0.16218 | 0.001471 | 0.005155 |
| TTLL6    | 17q21.32      | 0.162146 | 0.001474 | 0.005165 |
| IRAK1    | Xq28          | 0.162061 | 0.001482 | 0.005194 |
| EMC9     | 14q12         | 0.162039 | 0.001485 | 0.005201 |
| SCN4A    | 17q23.3       | -0.16201 | 0.001487 | 0.00521  |
| SLC39A11 | 17q24.3-q25.1 | -0.16199 | 0.00149  | 0.005217 |
| SHROOM3  | 4q21.1        | 0.16197  | 0.001492 | 0.005223 |
| OAS3     | 12q24.13      | 0.161954 | 0.001493 | 0.005227 |
| TLX1     | 10q24.31      | 0.161952 | 0.001494 | 0.005227 |
| TOR1A    | 9q34.11       | -0.16195 | 0.001494 | 0.005227 |
| TRPS1    | 8q23.3        | -0.16191 | 0.001498 | 0.00524  |
| COL6A2   | 21q22.3       | -0.16185 | 0.001504 | 0.005261 |
| RAD51AP2 | 2p24.2        | 0.161808 | 0.001508 | 0.005275 |
| KLHL32   | 6q16.1        | -0.1618  | 0.001509 | 0.005278 |
| GSTA4    | 6p12.2        | -0.16178 | 0.001511 | 0.005283 |
| PDZD2    | 5p13.3        | -0.16177 | 0.001512 | 0.005285 |
| DNAJA4   | 15q25.1       | 0.161767 | 0.001513 | 0.005287 |
| SNX20    | 16q12.1       | -0.16176 | 0.001513 | 0.005289 |
| MCRIP2   | 16p13.3       | 0.161703 | 0.001519 | 0.005308 |
| PIGP     | 21q22.13      | -0.16169 | 0.001521 | 0.005313 |
| RNF19A   | 8q22.2        | -0.16168 | 0.001521 | 0.005314 |
| ZFP82    | 19q13.12      | -0.16163 | 0.001527 | 0.005331 |
| EMD      | Xq28          | 0.161605 | 0.001529 | 0.00534  |
| NROB2    | 1p36.11       | -0.16158 | 0.001532 | 0.005346 |
| COP57A   | 12p13.31      | -0.16158 | 0.001532 | 0.005347 |
| APOL3    | 22q12.3       | -0.16158 | 0.001532 | 0.005347 |

|           |          |          |          |          |
|-----------|----------|----------|----------|----------|
| PUM3      | 9p24.2   | 0.161566 | 0.001533 | 0.00535  |
| HRAS      | 11p15.5  | 0.161552 | 0.001535 | 0.005355 |
| MTMR9     | 8p23.1   | -0.16154 | 0.001536 | 0.005358 |
| RAP1B     | 12q15    | -0.1615  | 0.001541 | 0.005373 |
| USP2      | 11q23.3  | -0.16147 | 0.001543 | 0.005381 |
| EVL       | 14q32.2  | -0.16145 | 0.001546 | 0.005389 |
| DTX1      | 12q24.13 | -0.16144 | 0.001547 | 0.00539  |
| STK35     | 20p13    | 0.161414 | 0.00155  | 0.0054   |
| NAA15     | 4q31.1   | 0.161403 | 0.001551 | 0.005403 |
| RAD54L2   | 3p21.2   | 0.161391 | 0.001552 | 0.005406 |
| CUL5      | 11q22.3  | -0.16139 | 0.001552 | 0.005406 |
| PRKCH     | 14q23.1  | -0.16138 | 0.001553 | 0.005407 |
| ECHDC2    | 1p32.3   | 0.161355 | 0.001556 | 0.005417 |
| FRMPD1    | 9p13.2   | -0.16134 | 0.001557 | 0.00542  |
| RNF121    | 11q13.4  | -0.16134 | 0.001558 | 0.005421 |
| HOXB8     | 17q21.32 | 0.161333 | 0.001558 | 0.005422 |
| LRRC4     | 7q32.1   | -0.16132 | 0.001559 | 0.005424 |
| ZNF239    | 10q11.21 | 0.161312 | 0.00156  | 0.005428 |
| CD226     | 18q22.2  | -0.16127 | 0.001565 | 0.005444 |
| TET1      | 10q21.3  | -0.16122 | 0.00157  | 0.00546  |
| SGIP1     | 1p31.3   | -0.1612  | 0.001572 | 0.005467 |
| C12ORF57  | 12p13.31 | -0.16119 | 0.001573 | 0.005469 |
| DARS      | 2q21.3   | -0.16113 | 0.00158  | 0.005493 |
| ZSWIM3    | 20q13.12 | -0.16105 | 0.001588 | 0.00552  |
| ATP2C2    | 16q24.1  | 0.161045 | 0.001589 | 0.00552  |
| ZNF236    | 18q23    | 0.161042 | 0.001589 | 0.00552  |
| CALCB     | 11p15.2  | -0.16104 | 0.001589 | 0.00552  |
| ELP2      | 18q12.2  | -0.16103 | 0.001591 | 0.005524 |
| SP110     | 2q37.1   | -0.16103 | 0.001591 | 0.005524 |
| ZNF416    | 19q13.43 | -0.16099 | 0.001595 | 0.005536 |
| TGFB1     | 5q31.1   | -0.16098 | 0.001596 | 0.00554  |
| BTF3P11   | 13q22.3  | -0.16097 | 0.001597 | 0.005542 |
| CREG1     | 1q24.2   | -0.16096 | 0.001598 | 0.005546 |
| COL28A1   | 7p21.3   | 0.160946 | 0.0016   | 0.00555  |
| SOX17     | 8q11.23  | -0.16094 | 0.0016   | 0.00555  |
| CYB5R2    | 11p15.4  | 0.160934 | 0.001601 | 0.005551 |
| HSD17B7   | 1q23.3   | 0.160934 | 0.001601 | 0.005551 |
| KIAA0100  | 17q11.2  | 0.160932 | 0.001601 | 0.005551 |
| BAK1      | 6p21.31  | 0.160917 | 0.001603 | 0.005556 |
| FAM234B   | 12p13.1  | -0.16091 | 0.001604 | 0.005557 |
| PARP3     | 3p21.2   | -0.16089 | 0.001606 | 0.005564 |
| CAB39     | 2q37.1   | -0.16087 | 0.001608 | 0.00557  |
| RTL8C     | Xq26.3   | -0.16087 | 0.001608 | 0.00557  |
| N4BP2L1   | 13q13.1  | -0.16086 | 0.001609 | 0.005571 |
| COL1A2    | 7q21.3   | -0.16085 | 0.00161  | 0.005574 |
| KCNK17    | 6p21.2   | -0.16085 | 0.00161  | 0.005574 |
| SEPTIN7P2 | 7p12.3   | 0.160795 | 0.001616 | 0.005595 |
| NOS2      | 17q11.2  | 0.160775 | 0.001618 | 0.005601 |
| DPP3      | 11q13.2  | 0.160774 | 0.001619 | 0.005601 |
| RAB29     | 1q32.1   | -0.16076 | 0.00162  | 0.005605 |
| JKAMP     | 14q23.1  | -0.16075 | 0.001621 | 0.005606 |
| RHOV      | 15q15.1  | 0.160751 | 0.001621 | 0.005606 |
| ABHD11    | 7q11.23  | 0.160748 | 0.001622 | 0.005607 |
| ELOA3     | 18q21.1  | 0.160741 | 0.001622 | 0.005608 |
| ZNF229    | 19q13.31 | -0.16074 | 0.001623 | 0.005609 |
| PLCG2     | 16q23.3  | -0.16072 | 0.001624 | 0.005614 |
| NCOA4     | 10q11.22 | -0.16071 | 0.001626 | 0.005617 |
| CLDN1     | 3q28     | -0.16068 | 0.001629 | 0.005626 |

|          |            |          |          |          |
|----------|------------|----------|----------|----------|
| CUL3     | 2q36.2     | -0.16066 | 0.001631 | 0.005633 |
| ELOVL6   | 4q25       | 0.160655 | 0.001632 | 0.005635 |
| RBM41    | Xq22.3     | 0.160653 | 0.001632 | 0.005635 |
| FAR1     | 11p15.3    | 0.160632 | 0.001634 | 0.005642 |
| DLX3     | 17q21.33   | -0.16062 | 0.001636 | 0.005647 |
| PSAT1    | 9q21.2     | 0.160603 | 0.001637 | 0.005651 |
| PURA     | 5q31.3     | -0.16057 | 0.001641 | 0.005661 |
| ESAM     | 11q24.2    | -0.16056 | 0.001642 | 0.005666 |
| ATXN7L3B | 12q21.1    | -0.16056 | 0.001643 | 0.005667 |
| ADAT3    | 19p13.3    | 0.160546 | 0.001644 | 0.005669 |
| WDR46    | 6p21.32    | 0.160544 | 0.001644 | 0.005669 |
| EPS8     | 12p12.3    | -0.16049 | 0.00165  | 0.005688 |
| SSX6P    | Xp11.23    | 0.160444 | 0.001655 | 0.005706 |
| GPR84    | 12q13.13   | -0.16044 | 0.001656 | 0.005706 |
| PCDHGB1  | 5q31.3     | -0.16041 | 0.001659 | 0.005716 |
| PCDHGB6  | 5q31.3     | -0.1604  | 0.001661 | 0.005722 |
| CLEC4A   | 12p13.31   | -0.16037 | 0.001664 | 0.005731 |
| SAP30    | 4q34.1     | 0.16035  | 0.001666 | 0.005737 |
| CLDN10   | 13q32.1    | -0.16034 | 0.001667 | 0.00574  |
| TRAF7    | 16p13.3    | 0.160337 | 0.001667 | 0.005741 |
| COMMD6   | 13q22.2    | -0.16029 | 0.001672 | 0.005756 |
| NT5C3B   | 17q21.2    | -0.16029 | 0.001673 | 0.005759 |
| ISCA1P1  | 5q12.1     | -0.16023 | 0.00168  | 0.005781 |
| HSD17B11 | 4q22.1     | -0.16022 | 0.00168  | 0.005781 |
| SULT4A1  | 22q13.31   | -0.16018 | 0.001685 | 0.005796 |
| ZNF727   | 7q11.21    | -0.16018 | 0.001685 | 0.005797 |
| ZNF880   | 19q13.41   | -0.16017 | 0.001686 | 0.005799 |
| FAM20A   | 17q24.2    | -0.16014 | 0.001689 | 0.005809 |
| FRMPD4   | Xp22.2     | -0.16013 | 0.001692 | 0.005815 |
| HS3ST5   | 6q21-q22.1 | -0.16008 | 0.001697 | 0.005833 |
| HSPB1P1  | 9q21.13    | -0.16007 | 0.001698 | 0.005834 |
| KLHL10   | 17q21.2    | -0.16006 | 0.001699 | 0.005838 |
| MAP3K13  | 3q27.2     | 0.160035 | 0.001702 | 0.005846 |
| WNT7A    | 3p25.1     | -0.16002 | 0.001703 | 0.00585  |
| RSBN1    | 1p13.2     | -0.15999 | 0.001707 | 0.005863 |
| YARS     | 1p35.1     | 0.159936 | 0.001713 | 0.005883 |
| ZNF585A  | 19q13.12   | -0.15992 | 0.001715 | 0.005886 |
| FAM163A  | 1q25.2     | -0.1599  | 0.001717 | 0.005894 |
| HS3ST4   | 16p12.1    | -0.1599  | 0.001718 | 0.005895 |
| BROX     | 1q41       | 0.159896 | 0.001718 | 0.005895 |
| HUWE1    | Xp11.22    | 0.159843 | 0.001724 | 0.005915 |
| TPCN2    | 11q13.3    | 0.159827 | 0.001726 | 0.00592  |
| PFDN6    | 6p21.32    | 0.159823 | 0.001726 | 0.005921 |
| PRIM2    | 6p11.2     | 0.159795 | 0.00173  | 0.005931 |
| XPC      | 3p25.1     | -0.15978 | 0.001731 | 0.005935 |
| PITPNM2  | 12q24.31   | 0.159766 | 0.001733 | 0.005941 |
| MFAP3L   | 4q33       | -0.15974 | 0.001736 | 0.005949 |
| URB1     | 21q22.11   | 0.159729 | 0.001737 | 0.005953 |
| ACTR8    | 3p21.1     | -0.1597  | 0.00174  | 0.005962 |
| SIMC1    | 5q35.2     | 0.159684 | 0.001743 | 0.005969 |
| METTL7A  | 12q13.12   | -0.15968 | 0.001743 | 0.005969 |
| CCDC159  | 19p13.2    | -0.15968 | 0.001744 | 0.005971 |
| RBM48    | 7q21.2     | -0.1596  | 0.001752 | 0.005999 |
| SLC18A3  | 10q11.23   | -0.15959 | 0.001754 | 0.006003 |
| FERD3L   | 7p21.1     | -0.15957 | 0.001756 | 0.006011 |
| RPS25    | 11q23.3    | -0.15956 | 0.001757 | 0.006012 |
| SLC6A6   | 3p25.1     | -0.15956 | 0.001758 | 0.006014 |
| GLIS3    | 9p24.2     | -0.15954 | 0.00176  | 0.006018 |

|          |          |          |          |          |
|----------|----------|----------|----------|----------|
| FAM81B   | 5q15     | -0.15952 | 0.001762 | 0.006027 |
| ZNF599   | 19q13.11 | -0.15951 | 0.001763 | 0.006028 |
| SFXN1    | 5q35.2   | 0.15951  | 0.001763 | 0.006028 |
| ZBTB14   | 18p11.31 | -0.15951 | 0.001764 | 0.006028 |
| SDS      | 12q24.13 | -0.1595  | 0.001764 | 0.00603  |
| WASH2P   | 2q14.1   | 0.159478 | 0.001767 | 0.006038 |
| PM20D1   | 1q32.1   | -0.15948 | 0.001767 | 0.006038 |
| PTPN5    | 11p15.1  | -0.15947 | 0.001768 | 0.00604  |
| FCF1     | 14q24.3  | -0.15947 | 0.001769 | 0.00604  |
| RTEL1    | 20q13.33 | 0.159455 | 0.00177  | 0.006043 |
| BRINP1   | 9q33.1   | -0.15945 | 0.00177  | 0.006043 |
| SNCG     | 10q23.2  | -0.15945 | 0.001771 | 0.006044 |
| PCGF3    | 4p16.3   | 0.159435 | 0.001772 | 0.006049 |
| MAGED4B  | Xp11.22  | -0.15942 | 0.001774 | 0.006054 |
| PTPN11   | 12q24.13 | 0.159411 | 0.001775 | 0.006057 |
| USP13    | 3q26.33  | 0.1594   | 0.001777 | 0.006061 |
| FCER2    | 19p13.2  | -0.15939 | 0.001778 | 0.006064 |
| CITED1   | Xq13.1   | 0.159363 | 0.001781 | 0.006074 |
| RGS11    | 16p13.3  | 0.159354 | 0.001782 | 0.006075 |
| ZNF260   | 19q13.12 | -0.15935 | 0.001782 | 0.006075 |
| PIGB     | 15q21.3  | -0.15935 | 0.001783 | 0.006075 |
| PCDHA11  | 5q31.3   | -0.15934 | 0.001784 | 0.006078 |
| ZNF709   | 19p13.2  | -0.15932 | 0.001787 | 0.006087 |
| CCDC66   | 3p14.3   | 0.159313 | 0.001787 | 0.006087 |
| EZR      | 6q25.3   | 0.15931  | 0.001787 | 0.006087 |
| TUBD1    | 17q23.1  | -0.15931 | 0.001788 | 0.006087 |
| ALKBH1   | 14q24.3  | -0.15929 | 0.00179  | 0.006093 |
| TMX3     | 18q22.1  | -0.15926 | 0.001793 | 0.006105 |
| PACS2    | 14q32.33 | 0.159243 | 0.001796 | 0.00611  |
| UPF1     | 19p13.11 | 0.159243 | 0.001796 | 0.00611  |
| FAM83E   | 19q13.33 | 0.15924  | 0.001796 | 0.006111 |
| RPP25    | 15q24.2  | 0.15923  | 0.001797 | 0.006114 |
| MBD6     | 12q13.3  | 0.159214 | 0.001799 | 0.006119 |
| CHADL    | 22q13.2  | -0.15919 | 0.001802 | 0.006127 |
| CDS1     | 4q21.23  | 0.15918  | 0.001803 | 0.006131 |
| TCL1A    | 14q32.13 | -0.15917 | 0.001804 | 0.006134 |
| SEPHS2   | 16p11.2  | -0.15914 | 0.001808 | 0.006146 |
| SLC35A4  | 5q31.3   | 0.159132 | 0.001809 | 0.006148 |
| NFKBIE   | 6p21.1   | -0.15912 | 0.00181  | 0.00615  |
| RUBCN    | 3q29     | 0.159122 | 0.00181  | 0.00615  |
| NDUFA5   | 7q31.32  | -0.15911 | 0.001812 | 0.006155 |
| LRRTM1   | 2p12     | -0.15911 | 0.001812 | 0.006155 |
| HOXA13   | 7p15.2   | 0.1591   | 0.001813 | 0.006156 |
| TLE2     | 19p13.3  | -0.15906 | 0.001818 | 0.006172 |
| LPIN1    | 2p25.1   | 0.15902  | 0.001823 | 0.006187 |
| CA9      | 9p13.3   | 0.158983 | 0.001827 | 0.006201 |
| CDH5     | 16q21    | -0.15898 | 0.001828 | 0.006202 |
| GOLT1B   | 12p12.1  | -0.15895 | 0.001831 | 0.006212 |
| CFAP36   | 2p16.1   | -0.15895 | 0.001831 | 0.006212 |
| FAM50B   | 6p25.2   | -0.15894 | 0.001832 | 0.006214 |
| HELZ2    | 20q13.33 | 0.158921 | 0.001835 | 0.006222 |
| PSORS1C3 | 6p21.33  | 0.158901 | 0.001837 | 0.006229 |
| KRT36    | 17q21.2  | -0.1589  | 0.001838 | 0.00623  |
| TMEM68   | 8q12.1   | -0.15889 | 0.001839 | 0.006233 |
| TADA3    | 3p25.3   | -0.15884 | 0.001845 | 0.006251 |
| ZFP2     | 5q35.3   | -0.15884 | 0.001845 | 0.006251 |
| HMGN1    | 21q22.2  | 0.158815 | 0.001848 | 0.00626  |
| TREX1    | 3p21.31  | 0.158788 | 0.001851 | 0.006271 |

|             |                 |          |          |          |
|-------------|-----------------|----------|----------|----------|
| LOC401463   | 8q12.3          | -0.15876 | 0.001855 | 0.006283 |
| RMND5B      | 5q35.3          | 0.158744 | 0.001857 | 0.006287 |
| SCML1       | Xp22.13         | 0.15874  | 0.001857 | 0.006288 |
| FKTN        | 9q31.2          | 0.158736 | 0.001858 | 0.006288 |
| GABRA5      | 15q12           | -0.15871 | 0.001861 | 0.006299 |
| NFE2L1      | 17q21.32        | -0.1587  | 0.001862 | 0.0063   |
| C11ORF87    | 11q22.3         | -0.15867 | 0.001866 | 0.006314 |
| C12ORF60    | 12p13.1-p12.3   | -0.15867 | 0.001867 | 0.006314 |
| MRPL50      | 9q31.1          | 0.158633 | 0.001871 | 0.006327 |
| STAT5B      | 17q21.2         | -0.15862 | 0.001872 | 0.00633  |
| DCHS2       | 4q31.3          | -0.15859 | 0.001876 | 0.006342 |
| RPL7L1      | 6p21.1          | 0.158551 | 0.001881 | 0.006358 |
| SLC22A16    | 6q21 6q21-q22.1 | -0.15851 | 0.001887 | 0.006376 |
| MAP3K6      | 1p36.11         | 0.158497 | 0.001888 | 0.006379 |
| BMP1        | 8p21.3          | -0.15848 | 0.00189  | 0.006384 |
| C17ORF107   | 17p13.2         | -0.15848 | 0.00189  | 0.006384 |
| VPS54       | 2p15-p14        | -0.15846 | 0.001892 | 0.00639  |
| SETD5       | 3p25.3          | 0.158461 | 0.001893 | 0.00639  |
| BET1P1      | 7q36.1          | -0.15846 | 0.001893 | 0.006391 |
| ASAP3       | 1p36.12         | -0.15843 | 0.001896 | 0.006401 |
| ERC2        | 3p14.3          | -0.15839 | 0.001902 | 0.006418 |
| SEMA4F      | 2p13.1          | -0.15836 | 0.001905 | 0.006429 |
| CD2         | 1p13.1          | -0.15835 | 0.001906 | 0.006431 |
| KCMF1       | 2p11.2          | -0.15834 | 0.001907 | 0.006434 |
| VASN        | 16p13.3         | -0.15832 | 0.00191  | 0.006443 |
| ABCA4       | 1p22.1          | -0.15831 | 0.001912 | 0.006447 |
| POLE3       | 9q32            | 0.158301 | 0.001913 | 0.00645  |
| OLFM2       | 19p13.2         | -0.1583  | 0.001914 | 0.00645  |
| TSEN2       | 3p25.2          | 0.158293 | 0.001914 | 0.006451 |
| TRAF6       | 11p12           | -0.15828 | 0.001916 | 0.006457 |
| PTPRC       | 1q31.3-q32.1    | -0.15827 | 0.001917 | 0.006459 |
| HAS1        | 19q13.41        | -0.15827 | 0.001917 | 0.006459 |
| TATDN3      | 1q32.3          | -0.15826 | 0.001918 | 0.006461 |
| CCL15-CCL14 | 17q12           | -0.15821 | 0.001925 | 0.006482 |
| C9ORF47     | 9q22.1          | -0.15814 | 0.001934 | 0.006511 |
| RPL31P11    | 1q23.3          | -0.15811 | 0.001938 | 0.006523 |
| UCKL1       | 20q13.33        | 0.158109 | 0.001938 | 0.006523 |
| ABCC3       | 17q21.33        | 0.158101 | 0.001939 | 0.006524 |
| SLBP        | 4p16.3          | 0.158101 | 0.001939 | 0.006524 |
| MFSD4B      | 6q21            | 0.158065 | 0.001944 | 0.006539 |
| PAPSS2      | 10q23.2-q23.31  | 0.158053 | 0.001945 | 0.006543 |
| TMEM199     | 17q11.2         | -0.15803 | 0.001949 | 0.006553 |
| NANOS3      | 19p13.12        | -0.15799 | 0.001953 | 0.006567 |
| NACC2       | 9q34.3          | 0.157991 | 0.001953 | 0.006567 |
| NR0B1       | Xp21.2          | -0.15799 | 0.001954 | 0.006567 |
| PDCD10      | 3q26.1          | -0.15798 | 0.001955 | 0.006571 |
| ATG14       | 14q22.3         | -0.15794 | 0.00196  | 0.006585 |
| ZC3H12A     | 1p34.3          | 0.157936 | 0.00196  | 0.006586 |
| GAB1        | 4q31.21         | -0.15791 | 0.001963 | 0.006595 |
| SUFU        | 10q24.32        | -0.15789 | 0.001966 | 0.006602 |
| DNAJC5G     | 2p23.3          | 0.157885 | 0.001967 | 0.006606 |
| CD33        | 19q13.41        | -0.15788 | 0.001968 | 0.006606 |
| TAFA4       | 3p14.1          | -0.15787 | 0.001969 | 0.006611 |
| ATP6V1D     | 14q23.3         | -0.15785 | 0.001971 | 0.006616 |
| TRAPPC6B    | 14q21.1         | -0.15781 | 0.001977 | 0.006635 |
| DERA        | 12p12.3         | -0.15779 | 0.001979 | 0.006641 |
| RAB5A       | 3p24.3          | -0.15772 | 0.001989 | 0.006671 |
| ST8SIA2     | 15q26.1         | -0.15772 | 0.001989 | 0.006672 |

|           |                |          |          |          |
|-----------|----------------|----------|----------|----------|
| GPC5      | 13q31.3        | -0.15771 | 0.00199  | 0.006674 |
| SIGLEC8   | 19q13.41       | -0.1577  | 0.001991 | 0.006676 |
| TRMU      | 22q13.31       | 0.157617 | 0.002003 | 0.006714 |
| SPATS2L   | 2q33.1         | -0.1576  | 0.002005 | 0.00672  |
| SIRT7     | 17q25.3        | 0.157593 | 0.002006 | 0.006722 |
| CP        | 3q24-q25.1     | -0.15756 | 0.002011 | 0.006738 |
| WASH5P    | 19p13.3        | 0.15752  | 0.002016 | 0.006753 |
| KRT71     | 12q13.13       | -0.15751 | 0.002017 | 0.006757 |
| JDP2      | 14q24.3        | -0.1575  | 0.002018 | 0.006759 |
| OSR1      | 2p24.1         | -0.15748 | 0.002021 | 0.006767 |
| STAT3     | 17q21.2        | -0.15747 | 0.002022 | 0.006771 |
| SLAMF8    | 1q23.2         | -0.15743 | 0.002028 | 0.006787 |
| FUBP3     | 9q34.11-q34.12 | 0.157416 | 0.00203  | 0.006793 |
| IGLON5    | 19q13.41       | -0.1574  | 0.002032 | 0.006799 |
| ARMC9     | 2q37.1         | -0.1574  | 0.002032 | 0.0068   |
| CENPQ     | 6p12.3         | 0.157384 | 0.002034 | 0.006804 |
| PVALB     | 22q12.3        | -0.15738 | 0.002035 | 0.006806 |
| MMD       | 17q22          | -0.15737 | 0.002036 | 0.006808 |
| SWT1      | 1q25.3         | -0.15736 | 0.002037 | 0.006811 |
| GEMIN5    | 5q33.2         | 0.157352 | 0.002038 | 0.006814 |
| CADM4     | 19q13.31       | -0.15734 | 0.002041 | 0.00682  |
| LGI1      | 10q23.33       | -0.15733 | 0.002041 | 0.00682  |
| ATP6V1B2  | 8p21.3         | -0.15733 | 0.002041 | 0.00682  |
| EHMT1-IT1 | 9q34.3         | 0.157309 | 0.002044 | 0.006829 |
| DNAJA2    | 16q11.2        | -0.15728 | 0.002048 | 0.00684  |
| LY6D      | 8q24.3         | -0.15724 | 0.002054 | 0.00686  |
| NAA50     | 3q13.31        | 0.157231 | 0.002055 | 0.006861 |
| USP30     | 12q24.11       | -0.15722 | 0.002056 | 0.006864 |
| AGBL2     | 11p11.2        | -0.1572  | 0.002059 | 0.006872 |
| ARID3C    | 9p13.3         | 0.157176 | 0.002063 | 0.006883 |
| UPF3B     | Xq24           | 0.157164 | 0.002064 | 0.006888 |
| CRYBG2    | 1p36.11        | 0.157101 | 0.002073 | 0.006915 |
| SPON2     | 4p16.3         | -0.15709 | 0.002074 | 0.006919 |
| ZNF772    | 19q13.43       | -0.15708 | 0.002075 | 0.00692  |
| SIVA1     | 14q32.33       | 0.157084 | 0.002075 | 0.00692  |
| MRPL49    | 11q13.1        | -0.15707 | 0.002077 | 0.006925 |
| COX4I2    | 20q11.21       | -0.15707 | 0.002077 | 0.006925 |
| PCDHGA5   | 5q31.3         | -0.15705 | 0.00208  | 0.006934 |
| SOCS7     | 17q12          | 0.157019 | 0.002084 | 0.006945 |
| GDPD3     | 16p11.2        | 0.157017 | 0.002085 | 0.006945 |
| MEIS2     | 15q14          | -0.15701 | 0.002086 | 0.006948 |
| RPL26     | 17p13.1        | -0.15698 | 0.00209  | 0.006959 |
| JPT1      | 17q25.1        | 0.156966 | 0.002092 | 0.006965 |
| AGAP11    | 10q23.2        | 0.156923 | 0.002098 | 0.006984 |
| DEDD      | 1q23.3         | 0.156903 | 0.0021   | 0.006992 |
| DBN1      | 5q35.3         | -0.1569  | 0.002101 | 0.006992 |
| ARRDC4    | 15q26.2        | -0.15686 | 0.002107 | 0.007012 |
| FCGR3A    | 1q23.3         | -0.15685 | 0.002108 | 0.007013 |
| SPTLC3    | 20p12.1        | -0.15684 | 0.002109 | 0.007015 |
| COA5      | 2q11.2         | -0.15679 | 0.002116 | 0.007038 |
| TMEM164   | Xq23           | 0.156789 | 0.002116 | 0.007038 |
| RRH       | 4q25           | 0.156764 | 0.00212  | 0.007049 |
| FCN1      | 9q34.3         | -0.15675 | 0.002121 | 0.007053 |
| CTAGE9    | 6q23.2         | 0.156728 | 0.002125 | 0.007063 |
| CARM1     | 19p13.2        | 0.156722 | 0.002126 | 0.007065 |
| KATNBL1P6 | 6q24.3         | -0.15672 | 0.002126 | 0.007065 |
| SRPK1     | 6p21.31        | 0.15671  | 0.002128 | 0.007067 |
| NEK7      | 1q31.3         | -0.15671 | 0.002128 | 0.007067 |

|           |                 |          |          |          |
|-----------|-----------------|----------|----------|----------|
| PLA2G7    | 6p12.3          | -0.15668 | 0.002132 | 0.007081 |
| RHOBTB1   | 10q21.2         | -0.15667 | 0.002133 | 0.007083 |
| CSPP1     | 8q13.1-q13.2    | 0.156641 | 0.002137 | 0.007096 |
| DPRXP4    | 17q11.2         | 0.156622 | 0.00214  | 0.007104 |
| MAGOHB    | 12p13.2         | 0.156609 | 0.002142 | 0.007108 |
| PTPN18    | 2q21.1          | 0.156608 | 0.002142 | 0.007108 |
| RHBDL3    | 17q11.2         | -0.1566  | 0.002142 | 0.007108 |
| U2AF1L4   | 19q13.12        | 0.156604 | 0.002143 | 0.007108 |
| CETN3     | 5q14.3          | -0.15659 | 0.002145 | 0.007112 |
| NAAA      | 4q21.1          | -0.15659 | 0.002145 | 0.007112 |
| NXPE3     | 3q12.3          | -0.15659 | 0.002145 | 0.007112 |
| ADRB3     | 8p11.23         | -0.15656 | 0.002149 | 0.007126 |
| ZNF134    | 19q13.43        | -0.15655 | 0.002151 | 0.007128 |
| MLLT3     | 9p21.3          | -0.15654 | 0.002152 | 0.00713  |
| EBF4      | 20p13           | -0.15654 | 0.002152 | 0.00713  |
| HMGXB3    | 5q32            | 0.156534 | 0.002153 | 0.007131 |
| PTPN9     | 15q24.2         | -0.15653 | 0.002153 | 0.007131 |
| PLXNA2    | 1q32.2          | 0.15653  | 0.002153 | 0.007131 |
| IQSEC3    | 12p13.33        | -0.15653 | 0.002154 | 0.007131 |
| PPP3R1    | 2p14            | -0.15652 | 0.002155 | 0.007133 |
| MMP8      | 11q22.2         | -0.15652 | 0.002155 | 0.007133 |
| KLHL41    | 2q31.1          | -0.15651 | 0.002156 | 0.007137 |
| COPA      | 1q23.2          | 0.1565   | 0.002157 | 0.007138 |
| RELA      | 11q13.1         | -0.1565  | 0.002158 | 0.007138 |
| USP36     | 17q25.3         | 0.156486 | 0.002159 | 0.007144 |
| HPCAL4    | 1p34.2          | -0.15648 | 0.00216  | 0.007144 |
| UBE2G1    | 17p13.2         | -0.15647 | 0.002161 | 0.007148 |
| APPL2     | 12q23.3         | -0.15644 | 0.002166 | 0.00716  |
| BDH1      | 3q29            | 0.156427 | 0.002168 | 0.007167 |
| PGM5P2    | 9p11.2          | -0.1564  | 0.002171 | 0.007176 |
| SP4       | 7p15.3          | -0.15638 | 0.002175 | 0.007189 |
| PPP4R4    | 14q32.12-q32.13 | -0.15636 | 0.002178 | 0.007195 |
| FAM131A   | 3q27.1          | -0.15634 | 0.002181 | 0.007205 |
| TRIM17    | 1q42.13         | 0.156322 | 0.002183 | 0.007211 |
| HIST2H2AC | 1q21.2          | 0.156236 | 0.002196 | 0.007251 |
| KIAA0355  | 19q13.11        | -0.1562  | 0.0022   | 0.007264 |
| ANKRD2    | 10q24.2         | -0.1562  | 0.0022   | 0.007264 |
| UBE2H     | 7q32.2          | -0.15616 | 0.002207 | 0.007285 |
| BCL2A1    | 15q25.1         | -0.15615 | 0.002208 | 0.007287 |
| SERPINA3  | 14q32.13        | -0.15609 | 0.002216 | 0.007314 |
| CHST7     | Xp11.3          | -0.15609 | 0.002217 | 0.007314 |
| CSRNP3    | 2q24.3          | -0.15607 | 0.002219 | 0.007321 |
| DGCR9     | 22q11.21        | 0.156036 | 0.002225 | 0.007337 |
| TSPAN10   | 17q25.3         | -0.15604 | 0.002225 | 0.007337 |
| RBM42     | 19q13.12        | 0.156026 | 0.002226 | 0.00734  |
| LINC00663 | 19p13.11        | -0.15598 | 0.002233 | 0.00736  |
| EXOC3L4   | 14q32.32        | 0.15598  | 0.002233 | 0.00736  |
| CHMP2B    | 3p11.2          | -0.15595 | 0.002237 | 0.007373 |
| FEM1A     | 19p13.3         | 0.155946 | 0.002238 | 0.007375 |
| ANAPC1    | 2q13            | 0.155878 | 0.002248 | 0.007406 |
| MIOS      | 7p21.3          | 0.155862 | 0.002251 | 0.007413 |
| CBX2      | 17q25.3         | 0.155861 | 0.002251 | 0.007413 |
| PTCHD1    | Xp22.11         | -0.15585 | 0.002252 | 0.007416 |
| DRD1      | 5q35.2          | -0.15581 | 0.002258 | 0.007434 |
| PLPP5     | 8p11.23         | -0.15581 | 0.002259 | 0.007434 |
| SP2       | 17q21.32        | 0.155799 | 0.00226  | 0.007438 |
| MARF1     | 16p13.11        | -0.15577 | 0.002264 | 0.007449 |
| RASSF6    | 4q13.3          | -0.15575 | 0.002267 | 0.007458 |



|          |               |          |          |          |
|----------|---------------|----------|----------|----------|
| SLC15A3  | 11q12.2       | -0.15575 | 0.002267 | 0.007458 |
| TMEM240  | 1p36.33       | -0.15575 | 0.002267 | 0.007458 |
| NUCB1    | 19q13.33      | -0.15573 | 0.002271 | 0.007467 |
| TANC2    | 17q23.2-q23.3 | -0.15572 | 0.002271 | 0.007468 |
| CYBB     | Xp21.1-p11.4  | -0.15572 | 0.002272 | 0.007469 |
| ABCA9    | 17q24.2       | -0.15568 | 0.002278 | 0.007488 |
| MRPL37   | 1p32.3        | 0.155662 | 0.00228  | 0.007494 |
| QRICH2   | 17q25.1       | 0.155661 | 0.002281 | 0.007494 |
| ZNF883   | 9q32          | -0.15563 | 0.002286 | 0.00751  |
| CLDND1   | 3q11.2        | -0.15561 | 0.002288 | 0.007515 |
| ZDHHC17  | 12q21.2       | -0.1556  | 0.002289 | 0.007519 |
| WDR59    | 16q23.1       | 0.155562 | 0.002296 | 0.007538 |
| SLC43A2  | 17p13.3       | -0.15556 | 0.002297 | 0.00754  |
| C9ORF152 | 9q31.3        | 0.15555  | 0.002297 | 0.007541 |
| RHOH     | 4p14          | -0.15554 | 0.002299 | 0.007547 |
| EPN1     | 19q13.42      | 0.155447 | 0.002313 | 0.007591 |
| H1FO     | 22q13.1       | -0.15543 | 0.002316 | 0.007599 |
| C20ORF96 | 20p13         | 0.155379 | 0.002324 | 0.007622 |
| STRADA   | 17q23.3       | -0.15538 | 0.002324 | 0.007623 |
| CASTOR1  | 22q12.2       | -0.15537 | 0.002325 | 0.007626 |
| CLEC2A   | 12p13.31      | -0.15536 | 0.002326 | 0.007626 |
| BARX2    | 11q24.3       | 0.15535  | 0.002328 | 0.007632 |
| OR10W1   | 11q12.1       | 0.155325 | 0.002332 | 0.007643 |
| MEI1     | 22q13.2       | -0.15531 | 0.002335 | 0.007651 |
| DENND5B  | 12p11.21      | -0.1553  | 0.002335 | 0.007651 |
| RASL10B  | 17q12         | -0.15529 | 0.002337 | 0.007656 |
| PMVK     | 1q21.3        | 0.155279 | 0.002339 | 0.007662 |
| NGB      | 14q24.3       | -0.15526 | 0.002342 | 0.00767  |
| FAM126A  | 7p15.3        | -0.15525 | 0.002344 | 0.007674 |
| WBP2     | 17q25.1       | -0.15525 | 0.002344 | 0.007674 |
| WDR88    | 19q13.11      | 0.155243 | 0.002344 | 0.007675 |
| HGSNAT   | 8p11.21-p11.1 | -0.15523 | 0.002347 | 0.007681 |
| CUX1     | 7q22.1        | -0.15522 | 0.002347 | 0.007682 |
| NSUN5    | 7q11.23       | 0.155184 | 0.002354 | 0.007701 |
| USP25    | 21q21.1       | -0.15514 | 0.00236  | 0.007719 |
| TMEM215  | 9p21.1        | -0.15514 | 0.00236  | 0.007719 |
| SS18L1   | 20q13.33      | 0.155118 | 0.002364 | 0.007731 |
| MAGEA4   | Xq28          | -0.1551  | 0.002367 | 0.00774  |
| AFF4     | 5q31.1        | -0.15508 | 0.00237  | 0.007747 |
| TNMD     | Xq22.1        | -0.15505 | 0.002374 | 0.007761 |
| DLG4     | 17p13.1       | -0.15504 | 0.002377 | 0.007767 |
| WFDC1    | 16q24.1       | -0.15503 | 0.002378 | 0.00777  |
| MORF4    | 4q34.1        | -0.15501 | 0.00238  | 0.007777 |
| TRO      | Xp11.21       | -0.155   | 0.002383 | 0.007784 |
| RRP9     | 3p21.2        | 0.154982 | 0.002385 | 0.00779  |
| TFF3     | 21q22.3       | -0.15498 | 0.002386 | 0.00779  |
| CHRNA3   | 2q37.1        | 0.154977 | 0.002386 | 0.00779  |
| MYOZ2    | 4q26          | -0.15496 | 0.002388 | 0.007796 |
| BAG3     | 10q26.11      | 0.154959 | 0.002389 | 0.007797 |
| RETREG3  | 17q21.2       | -0.15491 | 0.002397 | 0.007821 |
| AIFM1    | Xq26.1        | 0.154877 | 0.002402 | 0.007836 |
| UBE2O    | 17q25.1       | 0.154868 | 0.002403 | 0.00784  |
| TGFBR2   | 3p24.1        | -0.15485 | 0.002407 | 0.00785  |
| PCOTH    | 13q12.12      | 0.154837 | 0.002408 | 0.007853 |
| BTLA     | 3q13.2        | -0.15482 | 0.00241  | 0.007859 |
| BCL2L13  | 22q11.21      | -0.15481 | 0.002412 | 0.007863 |
| ENTPD3   | 3p22.1        | -0.15478 | 0.002416 | 0.007876 |
| ABCB1    | 7q21.12       | -0.15473 | 0.002425 | 0.007903 |

|           |                 |          |          |          |
|-----------|-----------------|----------|----------|----------|
| NLRX1     | 11q23.3         | -0.15471 | 0.002428 | 0.00791  |
| MRPL41    | 9q34.3          | 0.15467  | 0.002435 | 0.007932 |
| ANGPTL7   | 1p36.22         | -0.15466 | 0.002436 | 0.007935 |
| DYDC2     | 10q23.1         | -0.15465 | 0.002438 | 0.00794  |
| ZNF354C   | 5q35.3          | -0.15463 | 0.002441 | 0.00795  |
| KCNJ13    | 2q37.1          | 0.15461  | 0.002444 | 0.007958 |
| TPTE2P3   | 13q14.3         | -0.1546  | 0.002446 | 0.007962 |
| PLPPR1    | 9q31.1          | -0.15459 | 0.002448 | 0.007968 |
| SESN1     | 6q21            | -0.15453 | 0.002457 | 0.007995 |
| MBTPS1    | 16q23.3-q24.1   | -0.15453 | 0.002457 | 0.007995 |
| CDCP1     | 3p21.31         | 0.154527 | 0.002458 | 0.007995 |
| RNF26     | 11q23.3         | 0.154498 | 0.002462 | 0.008009 |
| NUDT12    | 5q21.2          | -0.1545  | 0.002463 | 0.008009 |
| TAS2R43   | 12p13.2         | 0.154476 | 0.002466 | 0.008018 |
| ZNF2      | 2q11.1          | -0.15447 | 0.002467 | 0.008021 |
| CDH6      | 5p13.3          | -0.15445 | 0.00247  | 0.00803  |
| BRSK1     | 19q13.42        | -0.15444 | 0.002472 | 0.008034 |
| HOXA11-AS | 7p15.2          | 0.154423 | 0.002474 | 0.008041 |
| HBA1      | 16p13.3         | 0.154419 | 0.002475 | 0.008042 |
| PGBD5     | 1q42.13         | -0.1544  | 0.002478 | 0.00805  |
| PRKAR2B   | 7q22.3          | -0.15438 | 0.002481 | 0.008058 |
| ARL3      | 10q24.32        | -0.15438 | 0.002482 | 0.008059 |
| IFI27L2   | 14q32.12        | -0.15438 | 0.002482 | 0.008059 |
| STK25     | 2q37.3          | 0.154372 | 0.002483 | 0.00806  |
| ZNF76     | 6p21.31         | 0.154347 | 0.002487 | 0.008072 |
| KCNB2     | 8q21.11         | -0.15432 | 0.00249  | 0.008082 |
| CD164L2   | 1p36.11         | 0.154286 | 0.002497 | 0.008102 |
| BBOX1     | 11p14.2         | -0.15428 | 0.002498 | 0.008105 |
| CTTNBP2NL | 1p13.2          | -0.15428 | 0.002499 | 0.008105 |
| ATOH8     | 2p11.2          | -0.15426 | 0.002502 | 0.008113 |
| SRCAP     | 16p11.2         | 0.154254 | 0.002502 | 0.008113 |
| ZAR1L     | 13q13.1         | 0.154252 | 0.002502 | 0.008113 |
| ZNF821    | 16q22.2         | -0.1542  | 0.00251  | 0.008137 |
| MGAT4C    | 12q21.31-q21.32 | -0.1542  | 0.002511 | 0.008137 |
| MOSPD2    | Xp22.2          | -0.1542  | 0.002511 | 0.008137 |
| FZD4      | 11q14.2         | -0.15418 | 0.002514 | 0.008144 |
| PLEKHG5   | 1p36.31         | 0.154182 | 0.002514 | 0.008144 |
| HSD11B1L  | 19p13.3         | -0.15417 | 0.002516 | 0.008148 |
| NAGA      | 22q13.2         | -0.15417 | 0.002516 | 0.00815  |
| JMJD1C    | 10q21.3         | -0.15414 | 0.002521 | 0.008163 |
| RAB3IP    | 12q15           | 0.154122 | 0.002524 | 0.008171 |
| ANO10     | 3p22.1-p21.33   | -0.15408 | 0.00253  | 0.00819  |
| UOX       | 1p31.1          | -0.15408 | 0.002531 | 0.008192 |
| BEGAIN    | 14q32.2         | 0.154064 | 0.002533 | 0.008197 |
| CLOCK     | 4q12            | 0.15406  | 0.002534 | 0.008198 |
| UBE2Z     | 17q21.32        | -0.15402 | 0.002541 | 0.00822  |
| NLRC4     | 2p22.3          | -0.15401 | 0.002542 | 0.008221 |
| AK2       | 1p35.1          | 0.153986 | 0.002546 | 0.008234 |
| OTX1      | 2p15            | 0.153965 | 0.00255  | 0.008244 |
| CD3D      | 11q23.3         | -0.15396 | 0.00255  | 0.008244 |
| DDX58     | 9p21.1          | -0.15394 | 0.002554 | 0.008256 |
| S100A10   | 1q21.3          | 0.153924 | 0.002557 | 0.008262 |
| ABCF3     | 3q27.1          | 0.153895 | 0.002562 | 0.008276 |
| DCC       | 18q21.2         | -0.15389 | 0.002562 | 0.008276 |
| NUDC      | 1p36.11         | 0.153836 | 0.002571 | 0.008306 |
| SYT9      | 11p15.4         | -0.15376 | 0.002584 | 0.008345 |
| SNAI1     | 20q13.13        | -0.15376 | 0.002585 | 0.008347 |
| AQP8      | 16p12.1         | -0.15375 | 0.002585 | 0.008347 |

|            |          |          |          |          |
|------------|----------|----------|----------|----------|
| MAPK8IP1P2 | 17q21.31 | -0.15375 | 0.002586 | 0.008347 |
| KLHL3      | 5q31.2   | -0.15373 | 0.002589 | 0.008356 |
| EHBP1      | 2p15     | -0.15371 | 0.002592 | 0.008364 |
| PDP2       | 16q22.1  | 0.153704 | 0.002594 | 0.008368 |
| NFKBIB     | 19q13.2  | 0.153703 | 0.002594 | 0.008368 |
| FAIM2      | 12q13.12 | 0.153696 | 0.002595 | 0.00837  |
| COG6       | 13q14.11 | -0.15363 | 0.002606 | 0.008403 |
| UBA6       | 4q13.2   | 0.153628 | 0.002607 | 0.008405 |
| WDSUB1     | 2q24.2   | -0.15361 | 0.00261  | 0.008415 |
| NTS        | 12q21.31 | -0.1536  | 0.002611 | 0.008417 |
| RIOX2      | 3q11.2   | 0.153558 | 0.002619 | 0.008439 |
| HMGCL      | 1p36.11  | -0.15349 | 0.00263  | 0.008474 |
| ECHDC1     | 6q22.33  | -0.15349 | 0.002631 | 0.008475 |
| GALNT10    | 5q33.2   | -0.15345 | 0.002638 | 0.008497 |
| IGSF11     | 3q13.32  | -0.15339 | 0.002647 | 0.008526 |
| SULT1C4    | 2q12.3   | -0.15334 | 0.002657 | 0.008555 |
| POU5F2     | 5q15     | 0.153324 | 0.002659 | 0.008559 |
| MRPS12     | 19q13.2  | 0.153324 | 0.002659 | 0.008559 |
| PTGIR      | 19q13.32 | -0.15332 | 0.002659 | 0.008559 |
| IL17C      | 16q24.2  | 0.153318 | 0.00266  | 0.00856  |
| XPO4       | 13q12.11 | 0.153305 | 0.002662 | 0.008566 |
| P2RY13     | 3q25.1   | -0.15326 | 0.002669 | 0.008588 |
| ZNF254     | 19p12    | -0.15326 | 0.00267  | 0.008588 |
| MAP1S      | 19p13.11 | 0.153255 | 0.002671 | 0.008589 |
| EPB41L3    | 18p11.31 | -0.15325 | 0.002671 | 0.008589 |
| CLDN6      | 16p13.3  | -0.15324 | 0.002673 | 0.008595 |
| VAX2       | 2p13.3   | -0.15323 | 0.002674 | 0.008597 |
| ZNF678     | 1q42.13  | 0.153212 | 0.002678 | 0.008608 |
| SPRYD3     | 12q13.13 | -0.15316 | 0.002688 | 0.008639 |
| FSTL5      | 4q32.2   | -0.15313 | 0.002693 | 0.008651 |
| PLXDC1     | 17q12    | -0.15311 | 0.002696 | 0.008662 |
| COMMD4     | 15q24.2  | 0.153057 | 0.002706 | 0.00869  |
| SMG1P2     | 16p11.2  | 0.153052 | 0.002706 | 0.008692 |
| ILRUN      | 6p21.31  | 0.153027 | 0.002711 | 0.008705 |
| ME1        | 6q14.2   | 0.153001 | 0.002715 | 0.008718 |
| SLC31A1    | 9q32     | 0.152995 | 0.002717 | 0.00872  |
| RNF41      | 12q13.3  | -0.15299 | 0.002717 | 0.00872  |
| EEF1A1P9   | 4q24     | -0.15295 | 0.002725 | 0.008745 |
| DNAJC30    | 7q11.23  | -0.15293 | 0.002727 | 0.00875  |
| MLANA      | 9p24.1   | 0.15291  | 0.002731 | 0.008762 |
| TRAFD1     | 12q24.13 | -0.15288 | 0.002737 | 0.008776 |
| UBXN4      | 2q21.3   | -0.15288 | 0.002737 | 0.008776 |
| MUSK       | 9q31.3   | -0.15285 | 0.002742 | 0.008792 |
| HMOX1      | 22q12.3  | -0.15285 | 0.002742 | 0.008792 |
| INS-IGF2   | 11p15.5  | -0.15281 | 0.002749 | 0.008811 |
| GPR89A     | 1q21.1   | 0.15281  | 0.002749 | 0.008811 |
| NUDT7      | 16q23.1  | -0.15279 | 0.002752 | 0.00882  |
| SCG5       | 15q13.3  | -0.15279 | 0.002753 | 0.00882  |
| COMT       | 22q11.21 | -0.15277 | 0.002756 | 0.008829 |
| SNX9       | 6q25.3   | -0.15277 | 0.002757 | 0.008829 |
| ZBTB11-AS1 | 3q12.3   | -0.15277 | 0.002757 | 0.008829 |
| MAGED4     | Xp11.22  | -0.15275 | 0.00276  | 0.008838 |
| PBLD       | 10q21.3  | -0.1527  | 0.00277  | 0.008866 |
| AKAP8L     | 19p13.12 | 0.152682 | 0.002772 | 0.008873 |
| MYO16      | 13q33.3  | -0.15262 | 0.002783 | 0.008908 |
| TSN        | 2q14.3   | -0.15258 | 0.002791 | 0.008932 |
| UBXN1      | 11q12.3  | -0.15255 | 0.002797 | 0.008948 |
| DTNA       | 18q12.1  | -0.15254 | 0.002798 | 0.008949 |

|             |                 |          |          |          |
|-------------|-----------------|----------|----------|----------|
| RHOXF2B     | Xq24            | 0.152516 | 0.002802 | 0.008962 |
| MUC4        | 3q29            | 0.152498 | 0.002806 | 0.00897  |
| ADGRF5      | 6p12.3          | -0.1525  | 0.002806 | 0.00897  |
| ZNF600      | 19q13.41        | 0.152495 | 0.002806 | 0.00897  |
| TMEM156     | 4p14            | -0.15249 | 0.002807 | 0.008971 |
| C1ORF94     | 1p35.1          | -0.15248 | 0.002809 | 0.008975 |
| CHST8       | 19q13.11        | -0.15248 | 0.002809 | 0.008975 |
| FDXACB1     | 11q23.1         | -0.15247 | 0.002811 | 0.008978 |
| WDFY4       | 10q11.23        | -0.15247 | 0.002811 | 0.008978 |
| EPHA2       | 1p36.13         | 0.152466 | 0.002811 | 0.008978 |
| LY6H        | 8q24.3          | -0.15247 | 0.002812 | 0.008978 |
| ESRG        | 3p14.3 3p14.3   | 0.152456 | 0.002813 | 0.008982 |
| UTS2B       | 3q28            | -0.15244 | 0.002817 | 0.008991 |
| EPM2A       | 6q24.3          | -0.15243 | 0.002817 | 0.008992 |
| PTPN21      | 14q31.3         | -0.1524  | 0.002824 | 0.00901  |
| DAD1P1      | 12p12.1         | -0.1524  | 0.002824 | 0.00901  |
| MTHFR       | 1p36.22         | 0.152364 | 0.00283  | 0.009028 |
| CNNM2       | 10q24.32        | -0.15236 | 0.002831 | 0.009031 |
| TCP11L1     | 11p13           | -0.15234 | 0.002834 | 0.009038 |
| CCR4        | 3p22.3          | -0.15233 | 0.002836 | 0.009043 |
| TSEN54      | 17q25.1         | 0.152328 | 0.002837 | 0.009043 |
| PCSK2       | 20p12.1         | -0.15231 | 0.002841 | 0.009055 |
| MYNN        | 3q26.2          | -0.1523  | 0.002842 | 0.009057 |
| CD300LB     | 17q25.1         | -0.15228 | 0.002845 | 0.009065 |
| RRAD        | 16q22.1         | -0.15225 | 0.002852 | 0.009085 |
| PCDHB9      | 5q31.3          | -0.1522  | 0.00286  | 0.00911  |
| MACROD2     | 20p12.1         | -0.1522  | 0.002861 | 0.009111 |
| ENPP3       | 6q23.2          | -0.15218 | 0.002865 | 0.009122 |
| PWWP2B      | 10q26.3         | 0.152166 | 0.002867 | 0.009127 |
| RTCB        | 22q12.3         | -0.15216 | 0.002867 | 0.009127 |
| ALPK2       | 18q21.31-q21.32 | -0.15214 | 0.002871 | 0.009139 |
| KLRD1       | 12p13.2         | -0.15213 | 0.002872 | 0.009141 |
| MME         | 3q25.2          | -0.15212 | 0.002876 | 0.00915  |
| HIC1        | 17p13.3         | -0.1521  | 0.002878 | 0.009157 |
| MAP3K14-AS1 | 17q21.31        | -0.15209 | 0.002881 | 0.009165 |
| PCDHA5      | 5q31.3          | -0.15206 | 0.002886 | 0.009179 |
| JPH1        | 8q21.11         | 0.152015 | 0.002895 | 0.009203 |
| NEPRO       | 3q13.2          | -0.15202 | 0.002895 | 0.009203 |
| SLC2A5      | 1p36.23         | -0.152   | 0.002898 | 0.009212 |
| ORAI3       | 16p11.2         | -0.15199 | 0.002899 | 0.009214 |
| MTMR11      | 1q21.2          | 0.151955 | 0.002906 | 0.009235 |
| EMX2        | 10q26.11        | -0.15192 | 0.002912 | 0.009253 |
| OLAH        | 10p13           | -0.15192 | 0.002913 | 0.009254 |
| VPS33A      | 12q24.31        | -0.1519  | 0.002916 | 0.009259 |
| ZNF583      | 19q13.43        | -0.1519  | 0.002916 | 0.009259 |
| TMEM117     | 12q12           | -0.1519  | 0.002916 | 0.009259 |
| SC5D        | 11q23.3-q24.1   | -0.1519  | 0.002916 | 0.009259 |
| QPCTL       | 19q13.32        | 0.15189  | 0.002918 | 0.009264 |
| ADORA2A     | 22q11.23        | -0.15187 | 0.002922 | 0.009275 |
| SCGN        | 6p22.2          | -0.15184 | 0.002927 | 0.009288 |
| TMEM25      | 11q23.3         | -0.15183 | 0.00293  | 0.009297 |
| CSRP1       | 1q32.1          | -0.15182 | 0.002931 | 0.0093   |
| NSUN6       | 10p12.31        | 0.151799 | 0.002935 | 0.009311 |
| BCCIP       | 10q26.2         | 0.151795 | 0.002936 | 0.009312 |
| C1ORF52     | 1p22.3          | -0.15178 | 0.002938 | 0.009317 |
| SLC24A2     | 9p22.1-p21.3    | -0.15175 | 0.002944 | 0.009333 |
| TXNL1       | 18q21.31        | -0.15173 | 0.002948 | 0.009344 |
| GPRASP1     | Xq22.1          | -0.15171 | 0.002953 | 0.009358 |

|           |              |          |          |          |
|-----------|--------------|----------|----------|----------|
| PYGM      | 11q13.1      | -0.15171 | 0.002953 | 0.009359 |
| MYOCD     | 17p12        | -0.15168 | 0.002957 | 0.009369 |
| CPA2      | 7q32.2       | -0.15166 | 0.002961 | 0.00938  |
| ALDH8A1   | 6q23.3       | -0.15166 | 0.002962 | 0.00938  |
| SLAMF1    | 1q23.3       | -0.15165 | 0.002963 | 0.009384 |
| KAT5      | 11q13.1      | -0.15164 | 0.002966 | 0.009392 |
| FOXN2     | 2p16.3       | -0.15162 | 0.002969 | 0.0094   |
| STARD8    | Xq13.1       | -0.1516  | 0.002973 | 0.009411 |
| NME8      | 7p14.1       | -0.15159 | 0.002975 | 0.009415 |
| ARIH1     | 15q24.1      | -0.15158 | 0.002978 | 0.009423 |
| ISX       | 22q12.3      | -0.15155 | 0.002982 | 0.009435 |
| SYNM      | 15q26.3      | -0.15155 | 0.002984 | 0.009439 |
| YWHAQ     | 2p25.1       | -0.15154 | 0.002984 | 0.009439 |
| SRPK2     | 7q22.3       | -0.15152 | 0.002989 | 0.009454 |
| ARAP1     | 11q13.4      | -0.1515  | 0.002992 | 0.00946  |
| PEPD      | 19q13.11     | -0.15149 | 0.002994 | 0.009466 |
| CBX7      | 22q13.1      | -0.15146 | 0.003    | 0.009481 |
| ZNF205    | 16p13.3      | 0.151463 | 0.003    | 0.009481 |
| KAZN      | 1p36.21      | -0.15144 | 0.003005 | 0.009495 |
| SERPINB8  | 18q22.1      | -0.15142 | 0.003008 | 0.009501 |
| IL10RA    | 11q23.3      | -0.15142 | 0.003008 | 0.009501 |
| TLCD3A    | 17p13.3      | 0.151386 | 0.003015 | 0.009521 |
| FABP3     | 1p35.2       | -0.15136 | 0.00302  | 0.009536 |
| GJC1      | 17q21.31     | -0.15134 | 0.003024 | 0.009549 |
| EVPL      | 17q25.1      | 0.151278 | 0.003036 | 0.009584 |
| TSPYL4    | 6q22.1       | -0.15126 | 0.00304  | 0.009595 |
| NTF3      | 12p13.31     | -0.15125 | 0.003042 | 0.0096   |
| CYB5D2    | 17p13.2      | -0.15122 | 0.003047 | 0.009614 |
| C17ORF77  | 17q25.1      | -0.15122 | 0.003048 | 0.009616 |
| MAN2B1    | 19p13.13     | -0.15118 | 0.003055 | 0.009637 |
| CXXC4     | 4q24         | -0.15113 | 0.003064 | 0.009663 |
| TP53I3    | 2p23.3       | -0.15111 | 0.003069 | 0.009678 |
| TICAM2    | 5q22.3       | -0.15109 | 0.003073 | 0.009686 |
| ZDHHC3    | 3p21.31      | 0.15109  | 0.003073 | 0.009686 |
| GCNT2     | 6p24.3-p24.2 | -0.15109 | 0.003073 | 0.009686 |
| FAM227A   | 22q13.1      | 0.151004 | 0.00309  | 0.009736 |
| KLHL9     | 9p21.3       | -0.151   | 0.00309  | 0.009736 |
| EPHA1     | 7q34-q35     | 0.150995 | 0.003092 | 0.00974  |
| ONECUT3   | 19p13.3      | 0.150948 | 0.003101 | 0.009768 |
| AKTIP     | 16q12.2      | -0.15094 | 0.003103 | 0.009771 |
| ZUP1      | 6q22.1       | 0.150937 | 0.003103 | 0.009771 |
| VPS53     | 17p13.3      | 0.150916 | 0.003107 | 0.009783 |
| VPS50     | 7q21.2-q21.3 | -0.15091 | 0.003108 | 0.009785 |
| ORC4      | 2q23.1       | -0.1509  | 0.00311  | 0.009787 |
| PLEK      | 2p14         | -0.1509  | 0.003111 | 0.009791 |
| GFAP      | 17q21.31     | -0.15089 | 0.003112 | 0.009791 |
| HERC5     | 4q22.1       | -0.15087 | 0.003117 | 0.009805 |
| SLC25A12  | 2q31.1       | -0.15086 | 0.003118 | 0.009807 |
| CD84      | 1q23.3       | -0.15086 | 0.00312  | 0.009811 |
| CCND1     | 11q13.3      | -0.15084 | 0.003123 | 0.009819 |
| TRIM36    | 5q22.3       | 0.15083  | 0.003125 | 0.009823 |
| MDGA1     | 6p21.2       | -0.15082 | 0.003127 | 0.009828 |
| LINC00597 | 15q24.3      | 0.150782 | 0.003134 | 0.009851 |
| PYHIN1    | 1q23.1       | -0.15078 | 0.003135 | 0.009851 |
| LINC00174 | 7q11.21      | 0.150766 | 0.003137 | 0.009858 |
| ATP5IF1   | 1p35.3       | 0.150755 | 0.00314  | 0.009863 |
| MUTYH     | 1p34.1       | 0.150752 | 0.00314  | 0.009864 |
| PKHD1     | 6p12.3-p12.2 | -0.15075 | 0.003142 | 0.009866 |

|             |                 |          |          |          |
|-------------|-----------------|----------|----------|----------|
| ZNF483      | 9q31.3          | -0.15071 | 0.003148 | 0.009885 |
| FAM86B3P    | 8p23.1          | 0.150709 | 0.003149 | 0.009886 |
| VWA5B1      | 1p36.12         | -0.1507  | 0.00315  | 0.009889 |
| MARCO       | 2q14.2          | -0.15069 | 0.003152 | 0.009893 |
| MIOX        | 22q13.33        | 0.150689 | 0.003153 | 0.009894 |
| PES1        | 22q12.2         | 0.150652 | 0.00316  | 0.009916 |
| SLC39A14    | 8p21.3          | -0.15065 | 0.003162 | 0.009917 |
| SYNJ2       | 6q25.3          | 0.150645 | 0.003162 | 0.009917 |
| RFPL4B      | 6q21            | -0.15062 | 0.003167 | 0.009933 |
| CREB3       | 9p13.3          | -0.15062 | 0.003168 | 0.009934 |
| PMP2        | 8q21.13         | -0.1506  | 0.003171 | 0.009941 |
| MAP3K2      | 2q14.3          | -0.15056 | 0.003179 | 0.009963 |
| OLFM1       | 9q34.3          | -0.15056 | 0.003179 | 0.009963 |
| RBM45       | 2q31.2          | -0.15056 | 0.003179 | 0.009963 |
| LMNTD2      | 11p15.5         | 0.150557 | 0.00318  | 0.009963 |
| SLC9B2      | 4q24            | -0.15055 | 0.003182 | 0.009968 |
| UBALD1      | 16p13.3         | 0.150544 | 0.003182 | 0.009968 |
| UTS2R       | 17q25.3         | -0.15052 | 0.003188 | 0.009985 |
| S100A3      | 1q21.3          | -0.15049 | 0.003194 | 0.010001 |
| TAF6L       | 11q12.3         | 0.150456 | 0.0032   | 0.01002  |
| PFDN1       | 5q31.3          | -0.15045 | 0.003202 | 0.010024 |
| HIST1H4E    | 6p22.2          | 0.150441 | 0.003204 | 0.010027 |
| MTHFD1L     | 6q25.1          | 0.150424 | 0.003207 | 0.010036 |
| LINC01106   | 2q13            | 0.150397 | 0.003213 | 0.010051 |
| LDLRAD3     | 11p13           | -0.15039 | 0.003214 | 0.010053 |
| PIGH        | 14q24.1         | -0.15038 | 0.003216 | 0.010059 |
| SIGLEC9     | 19q13.41        | -0.15037 | 0.003218 | 0.010064 |
| ARHGAP21    | 10p12.1 10p12.3 | 0.150356 | 0.003221 | 0.010069 |
| FGF8        | 10q24.32        | 0.150356 | 0.003221 | 0.010069 |
| TOX4        | 14q11.2         | -0.15036 | 0.003221 | 0.010069 |
| PDP1        | 8q22.1          | -0.15034 | 0.003224 | 0.010077 |
| GTF3C4      | 9q34.13         | 0.150328 | 0.003227 | 0.010082 |
| GAPDH       | 12p13.31        | 0.150326 | 0.003227 | 0.010082 |
| ALDOA       | 16p11.2         | 0.150325 | 0.003227 | 0.010082 |
| DZIP3       | 3q13.13         | -0.15027 | 0.003239 | 0.010117 |
| ANKRD20A11P | 21q11.2         | 0.150255 | 0.003242 | 0.010123 |
| MBNL1-AS1   | 3q25.1          | -0.15025 | 0.003242 | 0.010123 |
| KDM1B       | 6p22.3          | 0.150253 | 0.003242 | 0.010123 |
| CDNF        | 10p13           | -0.15025 | 0.003244 | 0.010125 |
| NELFA       | 4p16.3          | 0.150243 | 0.003245 | 0.010126 |
| ALK         | 2p23.2-p23.1    | -0.1502  | 0.003253 | 0.010152 |
| LRFN5       | 14q21.1         | -0.15018 | 0.003257 | 0.010162 |
| LOC643387   | 2q37.3          | 0.150154 | 0.003263 | 0.010179 |
| CHRNA5      | 15q25.1         | 0.150148 | 0.003264 | 0.010181 |
| CASP12      | 11q22.3         | -0.15014 | 0.003267 | 0.010188 |
| ADGRB1      | 8q24.3          | -0.15013 | 0.003268 | 0.01019  |
| MTHFSD      | 16q24.1         | 0.150049 | 0.003285 | 0.010241 |
| PLEKHA4     | 19q13.33        | -0.15003 | 0.003288 | 0.01025  |
| KCNE2       | 21q22.11        | -0.15002 | 0.003291 | 0.010258 |
| TRIP10      | 19p13.3         | 0.150013 | 0.003293 | 0.01026  |
| RAB23       | 6p12.1-p11.2    | -0.15    | 0.003296 | 0.010268 |
| DPEP2       | 16q22.1         | -0.14999 | 0.003298 | 0.010272 |
| ZCCHC17     | 1p35.2          | -0.14997 | 0.003301 | 0.010283 |
| TUBA4A      | 2q35            | 0.149962 | 0.003303 | 0.010287 |
| HAS3        | 16q22.1         | 0.149958 | 0.003304 | 0.010288 |
| UBA1        | Xp11.3          | 0.149951 | 0.003306 | 0.010291 |
| L3MBTL1     | 20q13.12        | 0.149948 | 0.003306 | 0.010291 |
| SOX10       | 22q13.1         | -0.14994 | 0.003307 | 0.010291 |

|             |                 |          |          |          |
|-------------|-----------------|----------|----------|----------|
| VANGL2      | 1q23.2          | -0.14994 | 0.003307 | 0.010291 |
| PALM2-AKAP2 | 9q31.3          | -0.14991 | 0.003314 | 0.010311 |
| PTMAP11     | 9q22.33         | 0.149899 | 0.003317 | 0.010317 |
| PPFIA2      | 12q21.31        | -0.14989 | 0.003318 | 0.010319 |
| CYBC1       | 17q25.3         | -0.14987 | 0.003323 | 0.010334 |
| C2ORF49     | 2q12.2          | -0.14987 | 0.003323 | 0.010334 |
| CFHR3       | 1q31.3          | -0.1498  | 0.003337 | 0.010373 |
| TTR         | 18q12.1         | -0.1498  | 0.003337 | 0.010374 |
| KIF21A      | 12q12           | 0.149797 | 0.003338 | 0.010375 |
| CRYBA4      | 22q12.1         | -0.14975 | 0.003348 | 0.010403 |
| SLC25A23    | 19p13.3         | 0.149736 | 0.003351 | 0.010412 |
| LINC01139   | 1q43            | -0.14973 | 0.003353 | 0.010417 |
| SNX1        | 15q22.31        | -0.14971 | 0.003357 | 0.010428 |
| CHST2       | 3q24            | -0.1497  | 0.00336  | 0.010434 |
| ZFAND5      | 9q21.13         | -0.14964 | 0.003372 | 0.010471 |
| SHROOM1     | 5q31.1          | 0.149618 | 0.003377 | 0.010481 |
| CCM2L       | 20q11.21        | -0.14962 | 0.003377 | 0.010481 |
| FBH1        | 10p15.1         | 0.149616 | 0.003377 | 0.010481 |
| PFKM        | 12q13.11        | 0.149597 | 0.003381 | 0.010492 |
| VENTX       | 10q26.3         | -0.14959 | 0.003384 | 0.010498 |
| TMEM244     | 6q22.33         | -0.14957 | 0.003387 | 0.010505 |
| ANKRD7      | 7q31.31         | -0.14954 | 0.003393 | 0.010525 |
| TMEM132C    | 12q24.32-q24.33 | -0.14953 | 0.003397 | 0.010534 |
| FMN2        | 1q43            | -0.14952 | 0.003398 | 0.010535 |
| MAP7        | 6q23.3          | 0.149517 | 0.003399 | 0.010536 |
| NMT2        | 10p13           | -0.14951 | 0.003401 | 0.010542 |
| LY6G6D      | 6p21.33         | -0.14948 | 0.003406 | 0.010557 |
| DPF2        | 11q13.1         | -0.14946 | 0.00341  | 0.010566 |
| CCDC92      | 12q24.31        | -0.14944 | 0.003415 | 0.010581 |
| CNTN3       | 3p12.3          | -0.14944 | 0.003416 | 0.010582 |
| NKX2-3      | 10q24.2         | -0.14943 | 0.003417 | 0.010582 |
| DUSP1       | 5q35.1          | -0.14935 | 0.003434 | 0.010636 |
| CD37        | 19q13.33        | -0.14934 | 0.003437 | 0.010643 |
| NPSR1-AS1   | 7p14.3          | 0.1493   | 0.003446 | 0.010668 |
| BRD4        | 19p13.12        | 0.149241 | 0.003459 | 0.010706 |
| PRKAB1      | 12q24.23        | -0.14924 | 0.003459 | 0.010707 |
| CFAP206     | 6q15            | -0.14923 | 0.003461 | 0.010708 |
| RAET1E      | 6q25.1          | 0.149215 | 0.003464 | 0.010719 |
| SLC44A3     | 1p21.3          | -0.14919 | 0.003469 | 0.010732 |
| LRRTM4      | 2p12            | -0.14919 | 0.00347  | 0.010732 |
| TRIM65      | 17q25.1         | 0.149178 | 0.003473 | 0.010739 |
| FPR1        | 19q13.41        | -0.14917 | 0.003474 | 0.010741 |
| ITIH5       | 10p14           | -0.14917 | 0.003474 | 0.010741 |
| OGFOD1      | 16q13           | 0.149143 | 0.00348  | 0.010758 |
| EFCAB7      | 1p31.3          | -0.14913 | 0.003484 | 0.010769 |
| AKAP3       | 12p13.32        | -0.14907 | 0.003497 | 0.010805 |
| WDR7        | 18q21.31        | -0.14899 | 0.003513 | 0.010855 |
| ELAVL3      | 19p13.2         | -0.14885 | 0.003546 | 0.010954 |
| CDIPT       | 16p11.2         | -0.14883 | 0.00355  | 0.010964 |
| TFAP2A      | 6p24.3          | 0.148822 | 0.003552 | 0.01097  |
| PHLDB3      | 19q13.31        | -0.14882 | 0.003553 | 0.01097  |
| NTN1        | 17p13.1         | -0.14881 | 0.003555 | 0.010973 |
| LRRC14B     | 5p15.33         | -0.14881 | 0.003555 | 0.010973 |
| SLTM        | 15q22.1         | 0.148806 | 0.003556 | 0.010974 |
| SLC15A2     | 3q13.33         | -0.14877 | 0.003564 | 0.010999 |
| CCDC9       | 19q13.32        | 0.148711 | 0.003577 | 0.011037 |
| RYBP        | 3p13            | -0.14871 | 0.003579 | 0.011039 |
| HJV         | 1q21.1          | 0.148688 | 0.003582 | 0.01105  |

|            |                    |          |          |          |
|------------|--------------------|----------|----------|----------|
| XCL1       | 1q24.2             | -0.14868 | 0.003584 | 0.011051 |
| SELE       | 1q24.2             | -0.14867 | 0.003585 | 0.011056 |
| CRB1       | 1q31.3             | -0.14866 | 0.00359  | 0.011067 |
| DPEP1      | 16q24.3            | -0.14858 | 0.003606 | 0.011116 |
| PLBD1      | 12p13.1            | -0.14857 | 0.003609 | 0.011124 |
| CHKB       | 22q13.33           | -0.14857 | 0.00361  | 0.011124 |
| GDNF       | 5p13.2             | -0.14856 | 0.003612 | 0.011128 |
| ZNF423     | 16q12.1            | -0.14855 | 0.003613 | 0.011128 |
| TTC9B      | 19q13.2            | 0.148554 | 0.003613 | 0.011128 |
| FAM13B     | 5q31.2             | -0.14854 | 0.003615 | 0.011134 |
| RPA4       | Xq21.33            | 0.148492 | 0.003627 | 0.011168 |
| RPL15      | 3p24.2             | -0.14849 | 0.003628 | 0.011168 |
| CYP11B2    | 8q24.3             | -0.14849 | 0.003628 | 0.011168 |
| GLRA2      | Xp22.2             | -0.14849 | 0.003629 | 0.011168 |
| SOS1       | 2p22.1             | -0.14848 | 0.003629 | 0.011168 |
| PXN        | 12q24.23           | 0.148456 | 0.003636 | 0.011186 |
| OOEP       | 6q13               | -0.14843 | 0.003642 | 0.011203 |
| ANKRD46    | 8q22.3             | -0.14843 | 0.003642 | 0.011203 |
| NODAL      | 10q22.1            | -0.14842 | 0.003644 | 0.011205 |
| MTURN      | 7p14.3             | -0.14841 | 0.003646 | 0.011212 |
| LCP2       | 5q35.1             | -0.14839 | 0.00365  | 0.011222 |
| PMM2       | 16p13.2            | 0.148346 | 0.003661 | 0.011254 |
| LEP        | 7q32.1             | -0.14834 | 0.003663 | 0.011259 |
| THAP10     | 15q23              | 0.148323 | 0.003666 | 0.011267 |
| PARD6G-AS1 | 18q23              | 0.148302 | 0.003671 | 0.01128  |
| MXI1       | 10q25.2            | -0.1483  | 0.003672 | 0.01128  |
| C6ORF120   | 6q27               | -0.14827 | 0.003679 | 0.0113   |
| CNTNAP4    | 16q23.1            | -0.14824 | 0.003685 | 0.011317 |
| TRPV2      | 17p11.2            | -0.14822 | 0.00369  | 0.01133  |
| UPF2       | 10p14              | 0.148183 | 0.003699 | 0.011356 |
| ZNF22      | 10q11.21           | -0.14818 | 0.003699 | 0.011356 |
| MIEF2      | 17p11.2            | -0.14817 | 0.003703 | 0.011365 |
| ZDHHC19    | 3q29               | -0.14816 | 0.003703 | 0.011365 |
| UGDH       | 4p14               | -0.14814 | 0.003709 | 0.011382 |
| NDUFAB1    | 16p12.2            | 0.148112 | 0.003716 | 0.011399 |
| CCDC33     | 15q24.1            | -0.1481  | 0.003718 | 0.011404 |
| SLC27A6    | 5q23.3             | -0.14809 | 0.00372  | 0.011409 |
| IL22RA1    | 1p36.11            | -0.14809 | 0.003721 | 0.011412 |
| GMEB1      | 1p35.3             | 0.148068 | 0.003726 | 0.011423 |
| CHCHD4     | 3p25.1             | 0.148064 | 0.003727 | 0.011424 |
| GPBP1L1    | 1p34.1             | -0.14806 | 0.003727 | 0.011424 |
| DCAF8      | 1q23.2             | 0.148059 | 0.003728 | 0.011425 |
| DCDC2      | 6p22.3             | 0.148049 | 0.00373  | 0.01143  |
| CD276      | 15q24.1            | -0.14803 | 0.003734 | 0.011439 |
| RS1        | Xp22.13            | -0.148   | 0.003742 | 0.011461 |
| FAHD2B     | 2q11.2             | -0.148   | 0.003742 | 0.011462 |
| PIGA       | Xp22.2             | 0.147979 | 0.003747 | 0.011474 |
| CUL4B      | Xq24               | -0.14795 | 0.003753 | 0.01149  |
| SUPT5H     | 19q13.2            | 0.147939 | 0.003756 | 0.011499 |
| SLC1A7     | 1p32.3             | -0.14793 | 0.003758 | 0.011503 |
| LOC256880  | 4q23               | 0.147923 | 0.00376  | 0.011505 |
| SLC37A2    | 11q24.2            | -0.14792 | 0.00376  | 0.011505 |
| CD99       | Xp22.33 and Yp11.2 | -0.14792 | 0.003761 | 0.011505 |
| SYT4       | 18q12.3            | -0.14791 | 0.003764 | 0.011514 |
| CD1D       | 1q23.1             | -0.1479  | 0.003765 | 0.011514 |
| COL2A1     | 12q13.11           | -0.14789 | 0.003769 | 0.011526 |
| CARMIL1    | 6p22.2             | 0.147875 | 0.003772 | 0.011532 |
| YDJC       | 22q11.21           | 0.147872 | 0.003772 | 0.011532 |



|           |                 |          |          |          |
|-----------|-----------------|----------|----------|----------|
| AGMO      | 7p21.2          | -0.14777 | 0.003798 | 0.011607 |
| C14ORF119 | 14q11.2         | -0.14776 | 0.003798 | 0.011607 |
| CNTNAP3   | 9p12            | -0.14776 | 0.0038   | 0.011609 |
| VWA1      | 1p36.33         | -0.14775 | 0.0038   | 0.011609 |
| NRBP2     | 8q24.3          | 0.147755 | 0.0038   | 0.011609 |
| CYB5A     | 18q22.3         | -0.14773 | 0.003806 | 0.011623 |
| PCF11     | 11q14.1         | 0.147731 | 0.003806 | 0.011623 |
| ZNF511    | 10q26.3         | 0.147666 | 0.003822 | 0.011669 |
| MAP7D1    | 1p34.3          | -0.14766 | 0.003824 | 0.011675 |
| ADGRG5    | 16q21           | 0.147642 | 0.003827 | 0.011683 |
| CLEC7A    | 12p13.2         | -0.1476  | 0.003837 | 0.011712 |
| ZMYND10   | 3p21.31         | 0.147598 | 0.003838 | 0.011712 |
| NEFM      | 8p21.2          | -0.14759 | 0.00384  | 0.011715 |
| AKR1C3    | 10p15.1         | -0.14758 | 0.003842 | 0.01172  |
| TAS2R19   | 12p13.2         | 0.147555 | 0.003849 | 0.011739 |
| AMER3     | 2q21.1          | -0.14753 | 0.003854 | 0.011754 |
| CHRM4     | 11p11.2         | -0.14753 | 0.003855 | 0.011755 |
| HARBI1    | 11p11.2         | -0.1475  | 0.003861 | 0.01177  |
| PSMD1     | 2q37.1          | 0.147495 | 0.003863 | 0.011776 |
| POGLUT1   | 3q13.33         | -0.14749 | 0.003864 | 0.011777 |
| DUSP22    | 6p25.3          | -0.14747 | 0.003869 | 0.011791 |
| ELOVL2    | 6p24.2          | -0.14745 | 0.003874 | 0.011803 |
| TTC5      | 14q11.2         | -0.14741 | 0.003883 | 0.01183  |
| NOTCH3    | 19p13.12        | -0.14736 | 0.003897 | 0.01187  |
| CYTH3     | 7p22.1          | -0.14735 | 0.003898 | 0.011871 |
| MVB12B    | 9q33.3          | 0.14735  | 0.003899 | 0.011871 |
| ARHGAP22  | 10q11.22-q11.23 | -0.14734 | 0.003902 | 0.01188  |
| KCTD12    | 13q22.3         | -0.1473  | 0.003911 | 0.011904 |
| CDC25B    | 20p13           | 0.147282 | 0.003915 | 0.011916 |
| SIGLEC17P | 19q13.41        | -0.14726 | 0.00392  | 0.01193  |
| TMX1      | 14q22.1         | -0.14722 | 0.003929 | 0.011956 |
| ZFP62     | 5q35.3          | 0.147206 | 0.003934 | 0.011968 |
| RNF148    | 7q31.32         | 0.147161 | 0.003945 | 0.011999 |
| OLFML2A   | 9q33.3          | -0.14716 | 0.003945 | 0.011999 |
| KCTD5     | 16p13.3         | 0.147156 | 0.003946 | 0.012    |
| ADRA1B    | 5q33.3          | -0.14714 | 0.003951 | 0.012012 |
| TMEM242   | 6q25.3          | -0.14711 | 0.003958 | 0.01203  |
| SCFD1     | 14q12           | -0.14711 | 0.003958 | 0.01203  |
| DEFB104A  | 8p23.1          | -0.1471  | 0.00396  | 0.012035 |
| SNHG7     | 9q34.3          | 0.147068 | 0.003968 | 0.012058 |
| MRPS5     | 2q11.1          | 0.147052 | 0.003972 | 0.012068 |
| AP1M1     | 19p13.11        | -0.14705 | 0.003973 | 0.012068 |
| ZBTB5     | 9p13.2          | 0.147042 | 0.003975 | 0.012072 |
| ACLY      | 17q21.2         | 0.147029 | 0.003978 | 0.01208  |
| PTCD1     | 7q22.1          | 0.147014 | 0.003982 | 0.012089 |
| GTF3C3    | 2q33.1          | -0.14698 | 0.003989 | 0.01211  |
| CNOT10    | 3p22.3          | 0.146976 | 0.003991 | 0.012115 |
| DUSP7     | 3p21.2          | 0.146946 | 0.003999 | 0.012135 |
| LINC00304 | 16q24.3         | 0.146945 | 0.003999 | 0.012135 |
| POLR2K    | 8q22.2          | -0.14691 | 0.004007 | 0.012157 |
| KCTD19    | 16q22.1         | 0.14691  | 0.004008 | 0.012157 |
| STXBP4    | 17q22           | -0.14691 | 0.004008 | 0.012157 |
| BAZ2B     | 2q24.2          | -0.14686 | 0.004021 | 0.012194 |
| STK32B    | 4p16.2          | -0.14684 | 0.004026 | 0.012206 |
| PHOX2B    | 4p13            | -0.14683 | 0.004027 | 0.01221  |
| ZNF326    | 1p22.2          | 0.146821 | 0.00403  | 0.012216 |
| NRROS     | 3q29            | -0.14682 | 0.004032 | 0.012218 |
| MC4R      | 18q21.32        | -0.1468  | 0.004037 | 0.012232 |

|           |          |          |          |          |
|-----------|----------|----------|----------|----------|
| ACRV1     | 11q24.2  | 0.146771 | 0.004043 | 0.012249 |
| FANK1     | 10q26.2  | 0.146767 | 0.004044 | 0.012251 |
| NANS      | 9q22.33  | 0.146755 | 0.004047 | 0.012257 |
| CMKLR1    | 12q23.3  | -0.14675 | 0.004047 | 0.012257 |
| ATG16L1   | 2q37.1   | 0.14671  | 0.004058 | 0.012288 |
| FAM86HP   | 3q22.1   | 0.146706 | 0.004059 | 0.012289 |
| SYT16     | 14q23.2  | -0.14671 | 0.00406  | 0.012289 |
| SLC3A1    | 2p21     | -0.1467  | 0.004061 | 0.012292 |
| GAA       | 17q25.3  | -0.14669 | 0.004064 | 0.012299 |
| LPCAT3    | 12p13.31 | -0.14667 | 0.004069 | 0.012312 |
| WWP1      | 8q21.3   | -0.14666 | 0.00407  | 0.012314 |
| PCDHA8    | 5q31.3   | -0.14664 | 0.004077 | 0.012332 |
| TSPAN7    | Xp11.4   | -0.14662 | 0.004082 | 0.012347 |
| ST7L      | 1p13.2   | -0.14654 | 0.004102 | 0.012404 |
| KAZALD1   | 10q24.31 | 0.146524 | 0.004106 | 0.012413 |
| DACT2     | 6q27     | -0.14652 | 0.004106 | 0.012413 |
| GPLD1     | 6p22.3   | -0.1465  | 0.004113 | 0.01243  |
| CYP17A1   | 10q24.32 | -0.14643 | 0.004131 | 0.012484 |
| ARID4A    | 14q23.1  | -0.14642 | 0.004134 | 0.01249  |
| SLC38A11  | 2q24.3   | -0.14641 | 0.004134 | 0.01249  |
| ZFAND4    | 10q11.22 | -0.14638 | 0.004144 | 0.012518 |
| HSPB6     | 19q13.12 | -0.14636 | 0.004148 | 0.012527 |
| RMND5A    | 2p11.2   | -0.14636 | 0.004149 | 0.012528 |
| ZNF429    | 19p12    | -0.14634 | 0.004153 | 0.012539 |
| ARL10     | 5q35.2   | -0.14633 | 0.004157 | 0.012548 |
| IRX1      | 5p15.33  | -0.14631 | 0.004161 | 0.01256  |
| PPP2R2D   | 10q26.3  | 0.146304 | 0.004163 | 0.012563 |
| ARHGEF17  | 11q13.4  | -0.14627 | 0.004172 | 0.012587 |
| PARVG     | 22q13.31 | -0.14627 | 0.004172 | 0.012587 |
| AACS      | 12q24.31 | 0.146266 | 0.004173 | 0.012588 |
| ARNTL     | 11p15.3  | -0.14626 | 0.004175 | 0.012591 |
| CATSPER3  | 5q31.1   | 0.146215 | 0.004186 | 0.012624 |
| KLKP1     | 19q13.33 | -0.14619 | 0.004192 | 0.012637 |
| FUZ       | 19q13.33 | -0.14619 | 0.004192 | 0.012637 |
| ATG5      | 6q21     | -0.14618 | 0.004195 | 0.012646 |
| MAP3K12   | 12q13.13 | -0.14617 | 0.004198 | 0.012651 |
| FZD8      | 10p11.21 | -0.14616 | 0.0042   | 0.012655 |
| RAMP2-AS1 | 17q21.2  | -0.14615 | 0.004203 | 0.012663 |
| PAMR1     | 11p13    | -0.14615 | 0.004203 | 0.012663 |
| OXR1      | 8q23.1   | -0.14613 | 0.004208 | 0.012674 |
| PWARSN    | 15q11.2  | -0.14613 | 0.004208 | 0.012674 |
| PTPA      | 9q34.11  | 0.146082 | 0.004221 | 0.01271  |
| RAN       | 12q24.33 | 0.146078 | 0.004222 | 0.012711 |
| CLEC12A   | 12p13.31 | -0.14607 | 0.004225 | 0.012718 |
| SSTR5     | 16p13.3  | 0.146049 | 0.00423  | 0.012731 |
| CTDSP2    | 12q14.1  | -0.14604 | 0.004232 | 0.012736 |
| RWDD2A    | 6q14.1   | -0.14602 | 0.004238 | 0.012751 |
| MEOX1     | 17q21.31 | -0.14602 | 0.004238 | 0.012751 |
| ZNF540    | 19q13.12 | -0.14601 | 0.00424  | 0.012753 |
| PAFAH1B3  | 19q13.2  | 0.146008 | 0.004241 | 0.012754 |
| BOLA3     | 2p13.1   | 0.145996 | 0.004244 | 0.012761 |
| MAP3K20   | 2q31.1   | -0.14599 | 0.004245 | 0.012762 |
| MYOT      | 5q31.2   | -0.14598 | 0.004247 | 0.012766 |
| NDUFS6    | 5p15.33  | 0.145957 | 0.004254 | 0.012787 |
| RNF144A   | 2p25.1   | -0.14593 | 0.00426  | 0.012802 |
| EEF1A1    | 6q13     | -0.14591 | 0.004266 | 0.012817 |
| COX7A2L   | 2p21     | -0.1459  | 0.004268 | 0.012824 |
| LINC00244 | 7q36.3   | 0.145887 | 0.004273 | 0.012835 |

|           |                |          |          |          |
|-----------|----------------|----------|----------|----------|
| PDE12     | 3p14.3         | 0.145834 | 0.004287 | 0.012875 |
| TMEM192   | 4q32.3         | -0.14583 | 0.004288 | 0.012875 |
| RUNDC3B   | 7q21.12        | -0.14583 | 0.004288 | 0.012875 |
| ARHGEF12  | 11q23.3        | -0.14581 | 0.004293 | 0.012887 |
| TNXB      | 6p21.33-p21.32 | -0.14579 | 0.004298 | 0.012901 |
| ILDR1     | 3q13.33        | -0.14577 | 0.004305 | 0.012919 |
| TTBK1     | 6p21.1         | 0.145766 | 0.004305 | 0.012919 |
| SNX32     | 11q13.1        | -0.14576 | 0.004306 | 0.012919 |
| RPP21     | 6p22.1         | 0.145704 | 0.004322 | 0.012965 |
| IGFL1     | 19q13.32       | -0.14568 | 0.004328 | 0.01298  |
| PRKAA2    | 1p32.2         | -0.14566 | 0.004333 | 0.012994 |
| GLO1      | 6p21.2         | 0.145632 | 0.004341 | 0.013017 |
| MCAM      | 11q23.3        | -0.14561 | 0.004346 | 0.01303  |
| DAAM1     | 14q23.1        | -0.14558 | 0.004355 | 0.013055 |
| SYT15     | 10q11.22       | -0.14553 | 0.004369 | 0.013095 |
| TMEM256   | 17p13.1        | -0.14553 | 0.00437  | 0.013095 |
| AK1       | 9q34.11        | 0.145514 | 0.004373 | 0.013103 |
| MAPRE2    | 18q12.1-q12.2  | -0.14551 | 0.004375 | 0.013108 |
| DCUN1D1   | 3q26.33        | -0.1455  | 0.004378 | 0.013114 |
| CA5B      | Xp22.2         | -0.14545 | 0.00439  | 0.013146 |
| CDH22     | 20q13.12       | -0.14545 | 0.00439  | 0.013146 |
| GSG1L     | 16p12.1        | -0.14545 | 0.004391 | 0.013147 |
| CEPT1     | 1p13.3         | -0.14543 | 0.004396 | 0.013158 |
| SEMA6C    | 1q21.3         | -0.14539 | 0.004408 | 0.013194 |
| RALGDS    | 9q34.13-q34.2  | 0.145383 | 0.004409 | 0.013195 |
| ZBTB17    | 1p36.13        | 0.145361 | 0.004415 | 0.01321  |
| LEO1      | 15q21.2        | 0.145354 | 0.004417 | 0.013215 |
| TBXT      | 6q27           | -0.14533 | 0.004423 | 0.013229 |
| PRG4      | 1q31.1         | -0.14533 | 0.004424 | 0.013233 |
| DOK2      | 8p21.3         | -0.14531 | 0.00443  | 0.013246 |
| ATP1B1    | 1q24.2         | 0.1453   | 0.004432 | 0.013251 |
| IKZF1     | 7p12.2         | -0.14527 | 0.004441 | 0.013275 |
| LINC00906 | 19q12          | -0.14526 | 0.004443 | 0.01328  |
| NELL2     | 12q12          | -0.14524 | 0.004448 | 0.013294 |
| TPCN1     | 12q24.13       | 0.14518  | 0.004465 | 0.013342 |
| USP45     | 6q16.2         | 0.145144 | 0.004475 | 0.01337  |
| DNAJC2    | 7q22.1         | 0.145131 | 0.004479 | 0.013379 |
| FAM173A   | 16p13.3        | 0.14512  | 0.004482 | 0.013386 |
| CD22      | 19q13.12       | -0.1451  | 0.004486 | 0.013397 |
| TRPV1     | 17p13.2        | 0.145103 | 0.004486 | 0.013397 |
| TPH2      | 12q21.1        | -0.1451  | 0.004488 | 0.013399 |
| NUB1      | 7q36.1         | -0.14509 | 0.004491 | 0.013406 |
| NINJ1     | 9q22.31        | -0.14508 | 0.004492 | 0.013406 |
| PCDHB19P  | 5q31.3         | -0.14508 | 0.004493 | 0.013409 |
| LYRM2     | 6q15           | -0.14506 | 0.004497 | 0.013419 |
| LOC401052 | 3p25.3         | 0.145049 | 0.004501 | 0.013429 |
| GLOD5     | Xp11.23        | -0.14503 | 0.004506 | 0.013442 |
| HDX       | Xq21.1         | -0.14502 | 0.004509 | 0.013446 |
| NKPD1     | 19q13.32       | 0.145003 | 0.004514 | 0.013461 |
| ZNF559    | 19p13.2        | -0.14497 | 0.004523 | 0.013486 |
| PIGV      | 1p36.11        | -0.14493 | 0.004533 | 0.013514 |
| CCL7      | 17q12          | -0.14493 | 0.004534 | 0.013514 |
| GBP4      | 1p22.2         | -0.14492 | 0.004537 | 0.013519 |
| CDK5      | 7q36.1         | -0.14492 | 0.004537 | 0.013519 |
| OCLN      | 5q13.2         | 0.144904 | 0.004542 | 0.013533 |
| SETD9     | 5q11.2         | -0.1449  | 0.004544 | 0.013536 |
| PLAA      | 9p21.2         | 0.144885 | 0.004547 | 0.013544 |
| MRPL53    | 2p13.1         | -0.14486 | 0.004553 | 0.01356  |

|                 |          |          |          |          |
|-----------------|----------|----------|----------|----------|
| CDC37L1         | 9p24.1   | -0.14485 | 0.004557 | 0.013568 |
| HOXD13          | 2q31.1   | -0.14484 | 0.004561 | 0.013578 |
| ABCG2           | 4q22.1   | -0.14483 | 0.004563 | 0.013581 |
| IDE             | 10q23.33 | 0.144829 | 0.004563 | 0.013582 |
| LRRC74B         | 22q11.21 | 0.144824 | 0.004565 | 0.013583 |
| INPP1           | 2q32.2   | 0.144765 | 0.004582 | 0.013632 |
| MYL2            | 12q24.11 | -0.14475 | 0.004585 | 0.013639 |
| KBTBD11         | 8p23.3   | 0.144745 | 0.004587 | 0.013644 |
| ZNF213          | 16p13.3  | 0.144743 | 0.004588 | 0.013644 |
| MINK1           | 17p13.2  | 0.144736 | 0.00459  | 0.013647 |
| S1PR2           | 19p13.2  | -0.14472 | 0.004593 | 0.013657 |
| PTEN            | 10q23.31 | -0.14471 | 0.004597 | 0.013664 |
| LINC01599       | 14q21.3  | 0.144695 | 0.004601 | 0.013676 |
| GPRC5C          | 17q25.1  | -0.14466 | 0.004612 | 0.013705 |
| RPS7            | 2p25.3   | -0.1446  | 0.004628 | 0.013752 |
| SFT2D3          | 2q14.3   | -0.14458 | 0.004634 | 0.013767 |
| XPNPEP3         | 22q13.2  | 0.144577 | 0.004635 | 0.013768 |
| CLVS2           | 6q22.31  | -0.14455 | 0.004641 | 0.013785 |
| AGGF1           | 5q13.3   | -0.14453 | 0.004647 | 0.013801 |
| SDR39U1         | 14q12    | 0.144516 | 0.004653 | 0.013814 |
| TPT1            | 13q14.13 | -0.14451 | 0.004653 | 0.013815 |
| UBE2J1          | 6q15     | -0.14449 | 0.00466  | 0.013833 |
| TCP1            | 6q25.3   | 0.144446 | 0.004673 | 0.013868 |
| GRIPAP1         | Xp11.23  | 0.144415 | 0.004682 | 0.013892 |
| NFE2            | 12q13.13 | -0.1444  | 0.004686 | 0.013902 |
| KEAP1           | 19p13.2  | 0.144378 | 0.004692 | 0.01392  |
| YEATS2          | 3q27.1   | 0.144299 | 0.004715 | 0.013986 |
| GJB5            | 1p34.3   | 0.144289 | 0.004718 | 0.013992 |
| CRYBG1          | 6q21     | 0.144281 | 0.004721 | 0.013998 |
| PKNOX1          | 21q22.3  | 0.144254 | 0.004728 | 0.014018 |
| FKBP4           | 12p13.33 | 0.144253 | 0.004729 | 0.014018 |
| LILRB4          | 19q13.42 | -0.14422 | 0.00474  | 0.014048 |
| TNFSF12-TNFSF13 | 17p13.1  | -0.14419 | 0.004747 | 0.014069 |
| ADGRD2          | 9q33.3   | 0.144166 | 0.004754 | 0.014087 |
| SMIM10L2B       | Xq26.3   | -0.14415 | 0.004759 | 0.014099 |
| BRD3OS          | 9q34.2   | -0.14413 | 0.004765 | 0.014112 |
| KDM3B           | 5q31.2   | 0.144129 | 0.004765 | 0.014112 |
| HES4            | 1p36.33  | 0.144128 | 0.004766 | 0.014112 |
| CDC42SE2        | 5q31.1   | -0.14412 | 0.004766 | 0.014113 |
| HSPA12B         | 20p13    | -0.14411 | 0.00477  | 0.014121 |
| DNAJB7          | 22q13.2  | 0.144099 | 0.004774 | 0.01413  |
| CCR8            | 3p22.1   | -0.14406 | 0.004785 | 0.014162 |
| TCF23           | 2p23.3   | -0.14406 | 0.004787 | 0.014164 |
| ITGA8           | 10p13    | -0.14405 | 0.004787 | 0.014164 |
| AGTR2           | Xq23     | -0.14404 | 0.00479  | 0.014171 |
| ZFYVE16         | 5q14.1   | -0.14404 | 0.004793 | 0.014174 |
| TC2N            | 14q32.12 | 0.144034 | 0.004793 | 0.014174 |
| TAF6            | 7q22.1   | 0.144032 | 0.004794 | 0.014174 |
| GSTM4           | 1p13.3   | 0.14403  | 0.004794 | 0.014174 |
| CLP1            | 11q12.1  | -0.14403 | 0.004795 | 0.014175 |
| USP1            | 1p31.3   | 0.144019 | 0.004798 | 0.01418  |
| JMJD1C-AS1      | 10q21.3  | -0.14401 | 0.004801 | 0.014188 |
| IL1RAPL2        | Xq22.3   | -0.144   | 0.004802 | 0.01419  |
| SPR             | 2p13.2   | -0.14399 | 0.004806 | 0.014197 |
| SPAG1           | 8q22.2   | -0.14399 | 0.004806 | 0.014197 |
| FLRT3           | 20p12.1  | -0.14396 | 0.004814 | 0.014218 |
| SMIM10L2A       | Xq26.3   | -0.14393 | 0.004823 | 0.014243 |
| TMEM114         | 16p13.2  | -0.14392 | 0.004826 | 0.01425  |

|           |              |          |          |          |
|-----------|--------------|----------|----------|----------|
| VASH2     | 1q32.3       | -0.1439  | 0.004832 | 0.014264 |
| SUGP1     | 19p13.11     | 0.143899 | 0.004833 | 0.014264 |
| KCNA4     | 11p14.1      | -0.1439  | 0.004833 | 0.014264 |
| SPPL3     | 12q24.31     | -0.14389 | 0.004837 | 0.014273 |
| TRMT112   | 11q13.1      | -0.14387 | 0.004842 | 0.014284 |
| HGFAC     | 4p16.3       | 0.143868 | 0.004842 | 0.014285 |
| LARGE2    | 11p11.2      | -0.14385 | 0.004849 | 0.014302 |
| MYH10     | 17p13.1      | -0.14384 | 0.004851 | 0.014305 |
| KNDC1     | 10q26.3      | 0.143799 | 0.004863 | 0.014339 |
| ANKS1A    | 6p21.31      | 0.143797 | 0.004864 | 0.014339 |
| RNASEH1   | 2p25.3       | 0.143791 | 0.004866 | 0.014342 |
| MDH1      | 2p15         | -0.14379 | 0.004867 | 0.014345 |
| TENM3     | 4q34.3-q35.1 | -0.14378 | 0.004869 | 0.014349 |
| CDK2AP1   | 12q24.31     | -0.14375 | 0.004878 | 0.014372 |
| BTN3A3    | 6p22.2       | -0.14375 | 0.004878 | 0.014372 |
| CALY      | 10q26.3      | -0.14374 | 0.004881 | 0.014378 |
| EIF4EBP1  | 8p11.23      | 0.143725 | 0.004885 | 0.014388 |
| C12ORF71  | 12p11.23     | 0.143702 | 0.004892 | 0.014407 |
| RELL2     | 5q31.3       | 0.143691 | 0.004895 | 0.014414 |
| LPAL2     | 6q25.3       | -0.14368 | 0.004899 | 0.014422 |
| TUBGCP3   | 13q34        | 0.143677 | 0.0049   | 0.014422 |
| SIRPB1    | 20p13        | -0.14366 | 0.004904 | 0.014433 |
| BDNF-AS   | 11p14.1      | -0.14363 | 0.004915 | 0.014464 |
| SYNPR     | 3p14.2       | -0.14359 | 0.004925 | 0.014489 |
| GMDS      | 6p25.3       | 0.143581 | 0.004929 | 0.014499 |
| HTRA4     | 8p11.22      | -0.14357 | 0.004932 | 0.014507 |
| PEX6      | 6p21.1       | 0.143564 | 0.004934 | 0.01451  |
| WAS       | Xp11.23      | -0.14356 | 0.004937 | 0.014515 |
| ANKRD50   | 4q28.1       | -0.14353 | 0.004945 | 0.014537 |
| GDF7      | 2p24.1       | -0.14348 | 0.004959 | 0.014578 |
| RXRA      | 9q34.2       | 0.143469 | 0.004963 | 0.014586 |
| REPS1     | 6q24.1       | 0.143465 | 0.004964 | 0.014588 |
| MPZL3     | 11q23.3      | -0.14346 | 0.004965 | 0.014589 |
| MYOM2     | 8p23.3       | -0.14344 | 0.004972 | 0.014608 |
| OPTN      | 10p13        | -0.14342 | 0.004978 | 0.014622 |
| AGXT      | 2q37.3       | -0.1434  | 0.004985 | 0.014639 |
| FOXD4     | 9p24.3       | 0.143388 | 0.004988 | 0.014646 |
| KLRC3     | 12p13.2      | -0.14337 | 0.004994 | 0.014661 |
| ANKRD13B  | 17q11.2      | 0.14336  | 0.004996 | 0.014667 |
| MAP3K5    | 6q23.3       | 0.14334  | 0.005002 | 0.014683 |
| SMIM5     | 17q25.1      | 0.143335 | 0.005004 | 0.014684 |
| CAMP      | 3p21.31      | -0.14333 | 0.005004 | 0.014684 |
| CCDC84    | 11q23.3      | 0.14333  | 0.005006 | 0.014686 |
| ZNRD1ASP  | 6p22.1       | 0.143286 | 0.005019 | 0.014724 |
| LDLRAP1   | 1p36.11      | 0.143283 | 0.00502  | 0.014724 |
| OTUD7B    | 1q21.2       | 0.143258 | 0.005028 | 0.014744 |
| LINC00652 | 20p11.23     | -0.14325 | 0.005029 | 0.014745 |
| NDFIP2    | 13q31.1      | -0.14322 | 0.00504  | 0.014775 |
| FBXO48    | 2p13.3       | -0.1432  | 0.005047 | 0.014794 |
| XKR8      | 1p35.3       | -0.14318 | 0.005051 | 0.014804 |
| SLC38A1   | 12q13.11     | 0.143179 | 0.005052 | 0.014805 |
| RAG1      | 11p12        | -0.14318 | 0.005053 | 0.014806 |
| LINC00339 | 1p36.12      | -0.14313 | 0.005068 | 0.014849 |
| KAT2B     | 3p24.3       | -0.14309 | 0.00508  | 0.014879 |
| RNF38     | 9p13.2       | -0.14309 | 0.005081 | 0.014881 |
| TIAF1     | 17q11.2      | 0.143067 | 0.005087 | 0.014896 |
| PSMD2     | 3q27.1       | 0.143062 | 0.005088 | 0.014898 |
| C2ORF15   | 2q11.2       | -0.14305 | 0.005092 | 0.014907 |

|           |                        |          |          |          |
|-----------|------------------------|----------|----------|----------|
| TIGAR     | 12p13.32               | -0.14302 | 0.005101 | 0.014931 |
| GPR35     | 2q37.3                 | 0.143017 | 0.005102 | 0.014931 |
| LGALS14   | 19q13.2                | -0.14302 | 0.005103 | 0.014931 |
| PTGES3    | 12q13.3 12             | 0.143007 | 0.005106 | 0.014938 |
| MTHFD2    | 2p13.1                 | 0.142995 | 0.005109 | 0.014947 |
| GOLGA6L5P | 15q25.2                | 0.142992 | 0.00511  | 0.014948 |
| PDE2A     | 11q13.4                | -0.14299 | 0.005112 | 0.01495  |
| CCR7      | 17q21.2                | -0.14297 | 0.005117 | 0.014963 |
| SLC38A3   | 3p21.31                | -0.14296 | 0.005119 | 0.014966 |
| RNF165    | 18q21.1                | -0.14292 | 0.005133 | 0.015005 |
| SREBF1    | 17p11.2                | 0.142915 | 0.005135 | 0.015007 |
| GPR82     | Xp11.4                 | -0.1429  | 0.005138 | 0.015017 |
| AOPEP     | 9q22.32                | -0.1429  | 0.00514  | 0.01502  |
| MSANTD1   | 4p16.3                 | 0.142873 | 0.005148 | 0.015039 |
| ETHE1     | 19q13.31               | 0.142851 | 0.005155 | 0.015057 |
| SLC22A7   | 6p21.1                 | 0.142848 | 0.005156 | 0.015058 |
| NRCAM     | 7q31.1                 | -0.14281 | 0.005166 | 0.015086 |
| TRIP6     | 7q22.1                 | -0.14281 | 0.005168 | 0.015089 |
| TEX35     | 1q25.2                 | 0.142807 | 0.005169 | 0.015089 |
| MED17     | 11q21                  | -0.1428  | 0.005171 | 0.015093 |
| SLC22A11  | 11q13.1                | -0.14278 | 0.005178 | 0.015112 |
| HECTD4    | 12q24.13               | 0.142699 | 0.005203 | 0.015182 |
| NPTX2     | 7q22.1                 | -0.14269 | 0.005204 | 0.015184 |
| HDAC11    | 3p25.1                 | -0.14268 | 0.005208 | 0.015194 |
| FAM201A   | 9p13.1                 | 0.142661 | 0.005215 | 0.015211 |
| SFT2D2    | 1q24.2                 | 0.142658 | 0.005216 | 0.015212 |
| KLK5      | 19q13.41               | -0.14262 | 0.005227 | 0.015241 |
| TMEM232   | 5q22.1                 | -0.14261 | 0.005232 | 0.015253 |
| EPS8L1    | 19q13.42               | 0.142606 | 0.005232 | 0.015253 |
| FLT1      | 13q12.3                | -0.1426  | 0.005234 | 0.015256 |
| SMIM11A   | 21q22.11-q22.12        | -0.1426  | 0.005236 | 0.015258 |
| LZTR1     | 22q11.21 22q11.1-q11.2 | 0.142568 | 0.005245 | 0.015282 |
| TNFSF14   | 19p13.3                | -0.14256 | 0.005247 | 0.015285 |
| KCNH2     | 7q36.1                 | -0.14252 | 0.005261 | 0.015325 |
| AGBL5     | 2p23.3                 | -0.1425  | 0.005266 | 0.015338 |
| HIKESHI   | 11q14.2                | -0.14248 | 0.005274 | 0.015358 |
| IL1RAP    | 3q28                   | -0.14244 | 0.005285 | 0.01539  |
| PEA15     | 1q23.2                 | -0.14244 | 0.005287 | 0.015391 |
| OR10A5    | 11p15.4                | 0.142421 | 0.005292 | 0.015405 |
| PLVAP     | 19p13.11               | -0.1424  | 0.005298 | 0.015419 |
| LSM7      | 19p13.3                | 0.14237  | 0.005309 | 0.015447 |
| PCDHAC1   | 5q31.3                 | -0.14237 | 0.005309 | 0.015447 |
| FOXE3     | 1p33                   | 0.142357 | 0.005313 | 0.015455 |
| ZNF808    | 19q13.41               | 0.142346 | 0.005316 | 0.015464 |
| CNKSR1    | 1p36.11                | 0.142324 | 0.005323 | 0.015483 |
| RAB26     | 16p13.3                | 0.142258 | 0.005345 | 0.015543 |
| HEXB      | 5q13.3                 | -0.14225 | 0.005349 | 0.015552 |
| TMEM245   | 9q31.3                 | -0.14222 | 0.005357 | 0.015574 |
| RAB11FIP2 | 10q26.11               | -0.1422  | 0.005364 | 0.015591 |
| SH3GL3    | 15q25.2                | -0.14219 | 0.005367 | 0.015598 |
| UVRAG     | 11q13.5                | -0.14217 | 0.005372 | 0.015611 |
| GPHN      | 14q23.3-q24.1          | 0.142171 | 0.005373 | 0.015612 |
| SUSD2     | 22q11.23               | -0.14217 | 0.005374 | 0.015613 |
| OSBPL3    | 7p15.3                 | 0.142137 | 0.005385 | 0.01564  |
| CD27      | 12p13.31               | -0.14213 | 0.005386 | 0.015641 |
| ERAP1     | 5q15                   | -0.1421  | 0.005398 | 0.015674 |
| LY9       | 1q23.3                 | -0.14209 | 0.005401 | 0.01568  |
| NPIP13    | 16p11.2                | 0.142079 | 0.005403 | 0.015686 |

|          |                    |          |          |          |
|----------|--------------------|----------|----------|----------|
| EPOP     | 17q12              | 0.142075 | 0.005405 | 0.015686 |
| BHLHE41  | 12p12.1            | -0.14207 | 0.005406 | 0.015686 |
| FOXO1    | 13q14.11           | -0.14207 | 0.005406 | 0.015686 |
| LRRC28   | 15q26.3            | -0.14207 | 0.005408 | 0.01569  |
| PODXL2   | 3q21.3             | 0.142045 | 0.005415 | 0.015708 |
| CDR1     | Xq27.1             | -0.14202 | 0.005422 | 0.015727 |
| FBXW10   | 17p11.2            | 0.142018 | 0.005424 | 0.015727 |
| PCDHB17P | 5q31.3             | -0.14202 | 0.005424 | 0.015727 |
| UAP1     | 1q23.3             | 0.142003 | 0.005429 | 0.015739 |
| TESPA1   | 12q13.2            | -0.142   | 0.005431 | 0.015742 |
| SNORA10  | 16p13.3            | 0.141979 | 0.005437 | 0.015757 |
| ZNF646   | 16p11.2            | 0.141971 | 0.005439 | 0.015762 |
| EPHB3    | 3q27.1             | 0.141952 | 0.005445 | 0.015776 |
| SDC3     | 1p35.2             | -0.14195 | 0.005446 | 0.015776 |
| SCYL3    | 1q24.2             | 0.141944 | 0.005448 | 0.015781 |
| HS6ST1   | 2q14.3             | -0.14193 | 0.005454 | 0.015797 |
| UTP25    | 1q32.2             | 0.1419   | 0.005463 | 0.015819 |
| TMEM144  | 4q32.1             | -0.14187 | 0.005471 | 0.015841 |
| WDR31    | 9q32               | 0.141778 | 0.005503 | 0.015932 |
| QTRT1    | 19p13.2            | 0.141774 | 0.005505 | 0.015934 |
| ATP2B2   | 3p25.3             | -0.14175 | 0.005513 | 0.015954 |
| ZNF737   | 19p12              | -0.14173 | 0.005519 | 0.015971 |
| WEE1     | 11p15.4            | 0.141705 | 0.005528 | 0.015994 |
| CLASP2   | 3p22.3             | -0.1417  | 0.005531 | 0.016    |
| ADH1C    | 4q23               | -0.14168 | 0.005536 | 0.016011 |
| VPS25    | 17q21.2            | -0.14168 | 0.005538 | 0.016016 |
| FGF9     | 13q12.11           | -0.14163 | 0.005554 | 0.016061 |
| SHROOM2  | Xp22.2             | -0.14161 | 0.005562 | 0.016079 |
| DIO3     | 14q32.31           | -0.1416  | 0.005563 | 0.016081 |
| TUBGCP5  | 15q11.2            | 0.141565 | 0.005575 | 0.016114 |
| STOX2    | 4q35.1             | -0.14156 | 0.005578 | 0.01612  |
| FJX1     | 11p13              | -0.14155 | 0.00558  | 0.016123 |
| CDH9     | 5p14.1             | -0.14154 | 0.005582 | 0.016127 |
| ASMTL    | Xp22.33 and Yp11.2 | -0.14153 | 0.005588 | 0.016142 |
| RBM5     | 3p21.31            | 0.14151  | 0.005594 | 0.016157 |
| DPY30    | 2p22.3             | -0.14148 | 0.005605 | 0.016187 |
| ZNF283   | 19q13.31           | 0.141468 | 0.005608 | 0.016193 |
| VAMP4    | 1q24.3             | -0.14143 | 0.005621 | 0.016227 |
| SETD1B   | 12q24.31           | 0.141413 | 0.005627 | 0.016243 |
| TIMM23   | 10q11.22           | 0.141402 | 0.005631 | 0.016251 |
| SP3      | 2q31.1             | -0.1414  | 0.005633 | 0.016253 |
| CARTPT   | 5q13.2             | -0.14139 | 0.005633 | 0.016253 |
| SMCO3    | 12p12.3            | -0.14139 | 0.005634 | 0.016253 |
| PCDH11X  | Xq21.31            | -0.14138 | 0.005637 | 0.01626  |
| PDIK1L   | 1p36.11            | 0.141381 | 0.005638 | 0.01626  |
| DHRS4L1  | 14q11.2            | -0.14137 | 0.005641 | 0.016267 |
| FLJ42627 | 16p13.3            | 0.141339 | 0.005652 | 0.016297 |
| BAZ2A    | 12q13.3            | 0.14133  | 0.005655 | 0.016303 |
| CEBPB    | 20q13.13           | -0.14131 | 0.005663 | 0.016322 |
| FLJ42393 | 3q27.3             | 0.141288 | 0.00567  | 0.01634  |
| STAT6    | 12q13.3            | 0.141278 | 0.005673 | 0.016348 |
| DOLPP1   | 9q34.11            | 0.141267 | 0.005677 | 0.016357 |
| SLCO3A1  | 15q26.1            | -0.14125 | 0.005682 | 0.016368 |
| PPP1R10  | 6p21.33            | 0.141221 | 0.005693 | 0.016398 |
| NIPAL4   | 5q33.3             | -0.14121 | 0.005697 | 0.016408 |
| TNRC6A   | 16p12.1            | 0.141157 | 0.005715 | 0.016457 |
| AKAP2    | 9q31.3             | -0.14113 | 0.005726 | 0.016485 |
| SLC26A2  | 5q32               | -0.14112 | 0.005728 | 0.016491 |

|             |                   |          |          |          |
|-------------|-------------------|----------|----------|----------|
| CDKN1B      | 12p13.1           | -0.14111 | 0.005733 | 0.0165   |
| NKAPP1      | Xq24              | -0.14103 | 0.005759 | 0.016573 |
| STRN3       | 14q12             | -0.14102 | 0.005762 | 0.016581 |
| TNFRSF14    | 1p36.32           | 0.141008 | 0.005767 | 0.016592 |
| TRMT61A     | 14q32.33          | 0.141003 | 0.005769 | 0.016594 |
| TOMM5       | 9p13.2            | 0.140987 | 0.005774 | 0.016608 |
| CARMIL3     | 14q11.2           | 0.140947 | 0.005788 | 0.016645 |
| TM9SF2      | 13q32.3           | -0.14093 | 0.005793 | 0.016657 |
| PNOC        | 8p21.1            | -0.14092 | 0.005797 | 0.016667 |
| ACR         | 22q13.33          | -0.14091 | 0.005801 | 0.016675 |
| PRKAA1      | 5p13.1            | -0.14091 | 0.005803 | 0.016677 |
| SH3BP5L     | 1q44              | 0.14088  | 0.005812 | 0.0167   |
| PLAAT2      | 11q12.3           | 0.140879 | 0.005812 | 0.0167   |
| SRGAP2      | 1q32.1            | 0.140875 | 0.005814 | 0.016702 |
| MRTO4       | 1p36.13           | 0.140859 | 0.005819 | 0.016715 |
| COMMD3      | 10p12.2           | -0.14084 | 0.005827 | 0.016735 |
| PPP1R12A    | 12q21.2-q21.31    | -0.14083 | 0.005829 | 0.016735 |
| CEMP1       | 16p13.3           | 0.140831 | 0.005829 | 0.016735 |
| MRO         | 18q21.2           | -0.14083 | 0.005829 | 0.016735 |
| LGI4        | 19q13.12 19q13.11 | -0.14082 | 0.005833 | 0.016742 |
| KLF2        | 19p13.11          | -0.14082 | 0.005833 | 0.016742 |
| SP1         | 12q13.13          | 0.140799 | 0.00584  | 0.01676  |
| HIST1H1D    | 6p22.2            | 0.140787 | 0.005845 | 0.01677  |
| IDH3A       | 15q25.1           | 0.140762 | 0.005853 | 0.016792 |
| STAT5A      | 17q21.2           | -0.14076 | 0.005854 | 0.016792 |
| ZNF622      | 5p15.1            | -0.14076 | 0.005856 | 0.016793 |
| NFATC1      | 18q23             | -0.14075 | 0.005856 | 0.016793 |
| IMPG2       | 3q12.3            | -0.14075 | 0.005857 | 0.016793 |
| ARMC1       | 8q13.1            | -0.14072 | 0.005868 | 0.016821 |
| KLHL13      | Xq24              | -0.14071 | 0.005871 | 0.016829 |
| NEIL1       | 15q24.2           | 0.140681 | 0.005882 | 0.016857 |
| TRARG1      | 17p13.3           | -0.14066 | 0.005889 | 0.01687  |
| SUZ12       | 17q11.2           | 0.140661 | 0.005889 | 0.01687  |
| EEF1A2      | 20q13.33          | -0.14066 | 0.00589  | 0.01687  |
| MIR4435-2HG | 2q13              | -0.14066 | 0.00589  | 0.01687  |
| PRPF39      | 14q21.2           | 0.140636 | 0.005898 | 0.016889 |
| GRTP1       | 13q34             | 0.140636 | 0.005898 | 0.016889 |
| WFDC9       | 20q13.12          | -0.1406  | 0.005911 | 0.016922 |
| WASH8P      | 12p13.33          | 0.140599 | 0.005911 | 0.016922 |
| ST8SIA3     | 18q21.31          | -0.14059 | 0.005916 | 0.016933 |
| LCMT1       | 16p12.1           | -0.14058 | 0.005919 | 0.016938 |
| BBS2        | 16q13             | -0.14057 | 0.005921 | 0.016942 |
| BCKDHB      | 6q14.1            | -0.14057 | 0.005922 | 0.016943 |
| GALNT12     | 9q22.33           | 0.140522 | 0.005939 | 0.016988 |
| VTA1        | 6q24.1-q24.2      | -0.14051 | 0.005943 | 0.016999 |
| CCDC157     | 22q12.2           | 0.140503 | 0.005946 | 0.017003 |
| SPRY4       | 5q31.3            | 0.140494 | 0.005949 | 0.01701  |
| FBXO11      | 2p16.3            | -0.14047 | 0.005957 | 0.01703  |
| DGKA        | 12q13.2           | 0.140462 | 0.00596  | 0.017038 |
| SLC13A3     | 20q13.12          | -0.14046 | 0.005962 | 0.017041 |
| PSMB2       | 1p34.3            | 0.140425 | 0.005974 | 0.017071 |
| CPSF4       | 7q22.1            | 0.140408 | 0.00598  | 0.017086 |
| POP7        | 7q22.1            | 0.140403 | 0.005982 | 0.017089 |
| WASHC5      | 8q24.13           | -0.14038 | 0.00599  | 0.01711  |
| TSHZ1       | 18q22.3           | -0.14035 | 0.006003 | 0.017144 |
| GTF2H5      | 6q25.3            | -0.14033 | 0.006008 | 0.017156 |
| PK2         | 17q21.33          | -0.14032 | 0.006012 | 0.017167 |
| KCNH1       | 1q32.2            | -0.1403  | 0.006019 | 0.017184 |



|              |          |          |          |          |
|--------------|----------|----------|----------|----------|
| DHX36        | 3q25.2   | -0.1403  | 0.006021 | 0.017185 |
| APLNR        | 11q12.1  | -0.14029 | 0.006021 | 0.017185 |
| ARHGAP29     | 1p22.1   | -0.14029 | 0.006023 | 0.017188 |
| BMPER        | 7p14.3   | -0.14028 | 0.006026 | 0.017195 |
| GAN          | 16q23.2  | 0.140244 | 0.006039 | 0.017229 |
| MNT          | 17p13.3  | 0.140231 | 0.006044 | 0.01724  |
| NPRL3        | 16p13.3  | 0.140228 | 0.006045 | 0.017241 |
| THEMIS       | 6q22.33  | -0.14022 | 0.006048 | 0.017246 |
| TSR3         | 16p13.3  | 0.140213 | 0.00605  | 0.017251 |
| TMEM108      | 3q22.1   | -0.1402  | 0.006057 | 0.017267 |
| IL15         | 4q31.21  | -0.14017 | 0.006067 | 0.017294 |
| ACP6         | 1q21.2   | 0.140154 | 0.006072 | 0.017306 |
| ZNF57        | 19p13.3  | 0.14015  | 0.006074 | 0.017307 |
| ARL6         | 3q11.2   | -0.14014 | 0.006079 | 0.017319 |
| RBPJ         | 4p15.2   | -0.14013 | 0.00608  | 0.017319 |
| POPDC3       | 6q21     | -0.14011 | 0.006088 | 0.017341 |
| CMTM5        | 14q11.2  | -0.14011 | 0.00609  | 0.017343 |
| ITGAM        | 16p11.2  | -0.1401  | 0.006093 | 0.017351 |
| TNNC2        | 20q13.12 | -0.14001 | 0.006124 | 0.017433 |
| NQO2         | 6p25.2   | 0.140013 | 0.006124 | 0.017433 |
| PSTPIP1      | 15q24.3  | -0.14    | 0.006128 | 0.017441 |
| NAV1         | 1q32.1   | -0.14    | 0.006128 | 0.017441 |
| NR2C1        | 12q22    | 0.13998  | 0.006136 | 0.01746  |
| LOC100129034 | 9q33.3   | 0.139962 | 0.006143 | 0.017477 |
| FBXO4        | 5p13.1   | -0.13993 | 0.006153 | 0.017503 |
| CLYBL        | 13q32.3  | -0.13992 | 0.006159 | 0.017518 |
| MORN3        | 12q24.31 | -0.13991 | 0.006161 | 0.017521 |
| MICB         | 6p21.33  | 0.139879 | 0.006174 | 0.017555 |
| KIAA1958     | 9q32     | 0.139848 | 0.006185 | 0.017584 |
| UBASH3B      | 11q24.1  | -0.13983 | 0.006192 | 0.017602 |
| GALR1        | 18q23    | -0.1398  | 0.006204 | 0.017634 |
| COLGALT1     | 19p13.11 | 0.139793 | 0.006205 | 0.017635 |
| CCDC93       | 2q14.1   | 0.13978  | 0.00621  | 0.017643 |
| LY6G6E       | 6p21.33  | -0.13978 | 0.00621  | 0.017643 |
| PCSK1        | 5q15     | -0.13978 | 0.006212 | 0.017643 |
| GABRQ        | Xq28     | -0.13978 | 0.006212 | 0.017643 |
| KIFAP3       | 1q24.2   | -0.13975 | 0.006223 | 0.017671 |
| PRKRIP1      | 7q22.1   | 0.1397   | 0.00624  | 0.017719 |
| LARGE1       | 22q12.3  | -0.13965 | 0.00626  | 0.017773 |
| SUMO2        | 17q25.1  | -0.13962 | 0.006269 | 0.017795 |
| SPTBN1       | 2p16.2   | 0.139596 | 0.006279 | 0.017822 |
| SLC6A20      | 3p21.31  | 0.139573 | 0.006288 | 0.017844 |
| MARS2        | 2q33.1   | 0.139564 | 0.006291 | 0.017852 |
| HMBS         | 11q23.3  | 0.139534 | 0.006303 | 0.017881 |
| MTHFD2L      | 4q13.3   | 0.139525 | 0.006306 | 0.017888 |
| IFFO1        | 12p13.31 | -0.13952 | 0.006309 | 0.017895 |
| XCL2         | 1q24.2   | -0.13946 | 0.006332 | 0.017953 |
| CNIH1        | 14q22.2  | -0.13946 | 0.006332 | 0.017953 |
| WAPL         | 10q23.2  | 0.139456 | 0.006332 | 0.017953 |
| CRYZL1       | 21q22.11 | -0.13944 | 0.006337 | 0.017965 |
| ZYG11B       | 1p32.3   | -0.13944 | 0.00634  | 0.017969 |
| ZNF43        | 19p12    | -0.13943 | 0.006344 | 0.017977 |
| NUDT9P1      | 10q23.32 | -0.13941 | 0.006351 | 0.017996 |
| GPR171       | 3q25.1   | -0.1394  | 0.006353 | 0.017998 |
| FOXO4        | Xq13.1   | -0.13938 | 0.006362 | 0.018021 |
| GTF3C2       | 2p23.3   | 0.139373 | 0.006364 | 0.018024 |
| OR51I1       | 11p15.4  | 0.139366 | 0.006367 | 0.018029 |
| ICMT         | 1p36.31  | 0.139332 | 0.006379 | 0.018063 |

|           |                   |          |          |          |
|-----------|-------------------|----------|----------|----------|
| UNKL      | 16p13.3           | 0.139323 | 0.006383 | 0.018069 |
| ITK       | 5q33.3            | -0.13932 | 0.006383 | 0.018069 |
| DNTTIP1   | 20q13.12          | -0.13931 | 0.006388 | 0.018079 |
| PTPRR     | 12q15             | -0.13929 | 0.006396 | 0.018099 |
| GRIP1     | 12q14.3           | -0.13929 | 0.006397 | 0.018099 |
| INTS4P2   | 7q11.21           | -0.13928 | 0.006399 | 0.018102 |
| SPAAR     | 9p13.3            | -0.13925 | 0.00641  | 0.01813  |
| SCNN1G    | 16p12.2           | -0.13925 | 0.00641  | 0.01813  |
| NHSL2     | Xq13.1            | -0.13925 | 0.006412 | 0.018132 |
| FLNA      | Xq28              | -0.13924 | 0.006416 | 0.018142 |
| MBIP      | 14q13.3           | -0.13922 | 0.006422 | 0.018157 |
| NMRK1     | 9q21.13           | -0.13921 | 0.006426 | 0.018162 |
| USO1      | 4q21.1            | -0.13921 | 0.006426 | 0.018162 |
| CTSG      | 14q12             | -0.1392  | 0.006431 | 0.018174 |
| AGT       | 1q42.2            | -0.13919 | 0.006433 | 0.018176 |
| UACA      | 15q23             | -0.13919 | 0.006436 | 0.018181 |
| C16ORF72  | 16p13.2           | -0.13918 | 0.006436 | 0.018181 |
| GOSR2     | 17q21.32          | -0.13917 | 0.006443 | 0.018194 |
| SEBOX     | 17q11.2           | 0.139167 | 0.006443 | 0.018194 |
| VMAC      | 19p13.3           | -0.13913 | 0.006459 | 0.018236 |
| WASHC4    | 12q23.3           | -0.13912 | 0.00646  | 0.018236 |
| UQCRBP1   | Xp11.21           | -0.13912 | 0.006462 | 0.018241 |
| SNORD17   | 20p11.23          | 0.139112 | 0.006464 | 0.018243 |
| RTL3      | Xq21.1            | -0.13911 | 0.006465 | 0.018243 |
| SLC10A5   | 8q21.13           | 0.139107 | 0.006466 | 0.018243 |
| CXADRP2   | 15q11.2           | -0.13911 | 0.006467 | 0.018243 |
| PHEX      | Xp22.11           | -0.1391  | 0.00647  | 0.01825  |
| BOLA2     | 16p11.2           | 0.139089 | 0.006473 | 0.018256 |
| FBXO7     | 22q12.3           | -0.13907 | 0.00648  | 0.01827  |
| COL15A1   | 9q22.33           | -0.13907 | 0.00648  | 0.01827  |
| TAS2R42   | 12p13.2           | 0.139032 | 0.006495 | 0.018308 |
| LRRCC1    | 8q21.2            | 0.139032 | 0.006495 | 0.018308 |
| MFSD5     | 12q13.13          | -0.13902 | 0.006498 | 0.018314 |
| NLK       | 17q11.2           | -0.13902 | 0.006501 | 0.018319 |
| LINC02210 | 17q21.31          | 0.139012 | 0.006503 | 0.018322 |
| ALPP      | 2q37.1            | 0.139005 | 0.006505 | 0.018327 |
| DMXL2     | 15q21.2           | 0.139003 | 0.006506 | 0.018327 |
| HPX       | 11p15.4           | 0.138952 | 0.006526 | 0.01838  |
| FANCD2OS  | 3p25.3            | 0.13894  | 0.006531 | 0.018391 |
| SNRPC     | 6p21.31           | 0.138881 | 0.006554 | 0.018453 |
| ACTN1     | 14q24.1 14q22-q24 | -0.13888 | 0.006556 | 0.018455 |
| SMOC1     | 14q24.2           | -0.13887 | 0.006559 | 0.018463 |
| LZTFL1    | 3p21.31           | -0.13884 | 0.006571 | 0.018494 |
| KYAT1     | 9q34.11           | 0.138828 | 0.006575 | 0.0185   |
| C8ORF58   | 8p21.3            | -0.13883 | 0.006575 | 0.0185   |
| KRT39     | 17q21.2           | -0.13882 | 0.006579 | 0.018509 |
| NLRP12    | 19q13.42          | -0.1388  | 0.006588 | 0.01853  |
| PCDHGA7   | 5q31.3            | -0.13878 | 0.006595 | 0.018547 |
| PLCE1     | 10q23.33          | 0.138774 | 0.006596 | 0.018548 |
| MED15     | 22q11.21          | 0.138764 | 0.0066   | 0.018557 |
| HSPB9     | 17q21.2           | -0.13872 | 0.006615 | 0.018597 |
| OR2A7     | 7q35              | 0.13872  | 0.006617 | 0.018599 |
| SLC6A9    | 1p34.1            | 0.138693 | 0.006628 | 0.018627 |
| SUPT4H1   | 17q22             | -0.13868 | 0.006634 | 0.018641 |
| FAM107B   | 10p13             | -0.13863 | 0.006654 | 0.018694 |
| GUSBP2    | 6p22.2            | 0.138599 | 0.006665 | 0.018725 |
| MASP1     | 3q27.3            | -0.1386  | 0.006666 | 0.018725 |
| TTC8      | 14q31.3           | -0.13858 | 0.006674 | 0.018744 |

|           |               |          |          |          |
|-----------|---------------|----------|----------|----------|
| ZHX2      | 8q24.13       | -0.13856 | 0.00668  | 0.018756 |
| SERTM1    | 13q13.3       | -0.13856 | 0.00668  | 0.018756 |
| CTAGE4    | 7q35          | 0.138525 | 0.006695 | 0.018793 |
| MPP2      | 17q21.31      | -0.13852 | 0.006695 | 0.018793 |
| DERL1     | 8q24.13       | -0.13849 | 0.006709 | 0.018828 |
| MRM2      | 7p22.3        | 0.138487 | 0.00671  | 0.018828 |
| APAF1     | 12q23.1       | 0.138471 | 0.006716 | 0.018844 |
| EMC2      | 8q23.1        | -0.13843 | 0.006734 | 0.01889  |
| RRAS2     | 11p15.2       | -0.13842 | 0.006735 | 0.018892 |
| SOD1      | 21q22.11      | 0.138399 | 0.006745 | 0.018916 |
| TSPAN15   | 10q22.1       | 0.138367 | 0.006758 | 0.01895  |
| TECTA     | 11q23.3       | -0.13836 | 0.00676  | 0.018954 |
| NKAIN1    | 1p35.2        | -0.13836 | 0.006763 | 0.018959 |
| CLDN2     | Xq22.3        | 0.138341 | 0.006769 | 0.018972 |
| CTBP1     | 4p16.3        | 0.13831  | 0.006781 | 0.019003 |
| SEPHS1    | 10p13         | 0.138309 | 0.006782 | 0.019003 |
| ZNF14     | 19p13.11      | -0.13829 | 0.006788 | 0.019018 |
| ZNF257    | 19p12         | -0.13824 | 0.00681  | 0.019078 |
| CALN1     | 7q11.22       | -0.13823 | 0.006812 | 0.019079 |
| WIF1      | 12q14.3       | -0.13823 | 0.006813 | 0.019079 |
| TTLL5     | 14q24.3       | 0.138228 | 0.006814 | 0.019082 |
| ZNF366    | 5q13.2 5q13.2 | -0.13818 | 0.006832 | 0.019128 |
| CCDC82    | 11q21         | -0.13818 | 0.006833 | 0.019128 |
| TNFRSF8   | 1p36.22       | -0.13818 | 0.006834 | 0.019129 |
| PLEKHG6   | 12p13.31      | -0.13816 | 0.00684  | 0.019141 |
| AGL       | 1p21.2        | -0.13816 | 0.00684  | 0.019141 |
| EIF5      | 14q32.32      | -0.13815 | 0.006845 | 0.01915  |
| LINC00189 | 21q21.3       | -0.13815 | 0.006846 | 0.01915  |
| FOXRED2   | 22q12.3       | 0.138143 | 0.006849 | 0.019157 |
| GJA9      | 1p34.3        | 0.138134 | 0.006852 | 0.019164 |
| TPI1P2    | 7q32.1        | -0.13812 | 0.006857 | 0.019173 |
| PI4KB     | 1q21.3        | 0.138089 | 0.006871 | 0.01921  |
| CDC42EP1  | 22q13.1       | 0.138062 | 0.006882 | 0.019238 |
| PLPP2     | 19p13.3       | 0.138029 | 0.006895 | 0.019273 |
| SNRPD3    | 22q11.23      | 0.137993 | 0.00691  | 0.019312 |
| TACR3     | 4q24          | 0.137973 | 0.006919 | 0.019333 |
| SH3D19    | 4q31.3        | -0.13797 | 0.006921 | 0.019336 |
| MANEA     | 6q16.1        | -0.13796 | 0.006922 | 0.019338 |
| SIAH1     | 16q12.1       | -0.13795 | 0.006929 | 0.019354 |
| MAGEF1    | 3q27.1        | -0.13793 | 0.006935 | 0.019369 |
| RAB11FIP4 | 17q11.2       | 0.137913 | 0.006943 | 0.019388 |
| GOT2      | 16q21         | 0.137897 | 0.00695  | 0.019403 |
| RPA3      | 7p21.3        | 0.137847 | 0.00697  | 0.019458 |
| MBTD1     | 17q21.33      | -0.13784 | 0.006973 | 0.019464 |
| FUT9      | 6q16.1        | -0.13782 | 0.006983 | 0.019488 |
| SIRPB2    | 20p13         | -0.1378  | 0.006988 | 0.019501 |
| CD207     | 2p13.3        | -0.13779 | 0.006996 | 0.019519 |
| KIRREL1   | 1q23.1        | -0.13777 | 0.007003 | 0.019537 |
| PPIL1     | 6p21.2        | 0.137715 | 0.007025 | 0.019595 |
| TMPRSS7   | 3q13.2        | -0.13771 | 0.007027 | 0.019599 |
| SPECC1    | 17p11.2       | -0.1377  | 0.007032 | 0.019609 |
| F2RL3     | 19p13.11      | -0.13766 | 0.007049 | 0.019654 |
| C4ORF46   | 4q32.1        | 0.137654 | 0.007051 | 0.019655 |
| HMGCS1    | 5p12          | 0.137651 | 0.007052 | 0.019656 |
| PTPRA     | 20p13         | -0.13764 | 0.007056 | 0.019665 |
| TMEM219   | 16p11.2       | -0.13761 | 0.007067 | 0.019694 |
| GP5       | 3q29          | -0.13759 | 0.007076 | 0.019714 |
| NECTIN4   | 1q23.3        | 0.137592 | 0.007077 | 0.019714 |

|           |               |          |          |          |
|-----------|---------------|----------|----------|----------|
| PNMA1     | 14q24.3       | -0.13756 | 0.007091 | 0.01975  |
| GZMM      | 19p13.3       | -0.13754 | 0.007098 | 0.019769 |
| MON1A     | 3p21.31       | 0.137506 | 0.007113 | 0.019806 |
| SURF2     | 9q34.2        | 0.137471 | 0.007127 | 0.019844 |
| SMIM26    | 20p11.23      | -0.13747 | 0.007129 | 0.019846 |
| ZKSCAN5   | 7q22.1        | -0.13747 | 0.00713  | 0.019846 |
| CRYBG3    | 3q11.2        | 0.137456 | 0.007134 | 0.019854 |
| GUCY2C    | 12p12.3       | -0.13745 | 0.007135 | 0.019855 |
| MCU       | 10q22.1       | 0.137448 | 0.007137 | 0.019858 |
| SCARA5    | 8p21.1        | -0.13744 | 0.007139 | 0.019858 |
| PI4KA     | 22q11.21      | 0.137443 | 0.007139 | 0.019858 |
| SHISAL1   | 22q13.31      | -0.13742 | 0.007147 | 0.019877 |
| EFHB      | 3p24.3        | -0.13741 | 0.007153 | 0.019891 |
| PRB1      | 12p13.2       | -0.1374  | 0.007157 | 0.019899 |
| NABP2     | 12q13.3       | 0.137396 | 0.007159 | 0.019903 |
| HIST1H3G  | 6p22.2        | 0.137307 | 0.007197 | 0.020005 |
| PLRG1     | 4q31.3        | -0.13729 | 0.007203 | 0.020018 |
| ATP5F1C   | 10p14         | 0.137288 | 0.007205 | 0.020022 |
| HNRNPA1L2 | 13q14.3       | 0.137281 | 0.007208 | 0.020027 |
| RASD2     | 22q12.3       | -0.13727 | 0.007214 | 0.020038 |
| TXLNG     | Xp22.2        | 0.137266 | 0.007214 | 0.020038 |
| UGT2B15   | 4q13.2        | -0.13727 | 0.007215 | 0.020038 |
| ZFYVE28   | 4p16.3        | 0.137236 | 0.007228 | 0.02007  |
| SIGLEC5   | 19q13.41      | -0.13722 | 0.007235 | 0.020087 |
| RAB39A    | 11q22.3       | -0.13721 | 0.007236 | 0.020089 |
| PDHA1     | Xp22.12       | 0.137196 | 0.007244 | 0.020108 |
| PICALM    | 11q14.2       | -0.13719 | 0.007246 | 0.020109 |
| TMEM246   | 9q31.1        | 0.137154 | 0.007263 | 0.020153 |
| BTN2A1    | 6p22.2        | 0.137071 | 0.007298 | 0.02025  |
| MTMR9LP   | 1p35.2        | 0.137017 | 0.007322 | 0.020312 |
| USP8      | 15q21.2       | -0.13698 | 0.007336 | 0.020348 |
| TRPC4AP   | 20q11.22      | -0.13698 | 0.007338 | 0.020351 |
| ALLC      | 2p25.3        | -0.13696 | 0.007345 | 0.020368 |
| RNASE4    | 14q11.2       | -0.13695 | 0.007352 | 0.020384 |
| AIMP2     | 7p22.1        | 0.136943 | 0.007354 | 0.020387 |
| PTH2R     | 2q34          | -0.13694 | 0.007356 | 0.020389 |
| FAM207A   | 21q22.3       | 0.136935 | 0.007357 | 0.020389 |
| LINC00689 | 7q36.3        | -0.13693 | 0.007358 | 0.020389 |
| SEMA4B    | 15q26.1       | 0.136918 | 0.007365 | 0.020406 |
| OVCA2     | 17p13.3       | -0.13691 | 0.007367 | 0.020409 |
| PHIP      | 6q14.1        | 0.136909 | 0.007368 | 0.02041  |
| FAM114A1  | 4p14          | -0.1369  | 0.007371 | 0.020416 |
| ERCC2     | 19q13.32      | 0.136895 | 0.007375 | 0.020422 |
| THSD4     | 15q23         | -0.13689 | 0.007377 | 0.020425 |
| LRRC42    | 1p32.3        | -0.13688 | 0.007382 | 0.020437 |
| L3MBTL2   | 22q13.2       | 0.13687  | 0.007385 | 0.020443 |
| TRIM40    | 6p22.1        | 0.136849 | 0.007395 | 0.020466 |
| GMPPB     | 3p21.31       | 0.136828 | 0.007404 | 0.020488 |
| SMG1P1    | 16p12.2       | 0.13681  | 0.007412 | 0.020507 |
| CYSLTR2   | 13q14.2       | -0.13679 | 0.007421 | 0.020531 |
| LCN10     | 9q34.3        | -0.13677 | 0.007428 | 0.020547 |
| DOCK8     | 9p24.3        | -0.13677 | 0.00743  | 0.020548 |
| ANAPC4    | 4p15.2        | 0.136764 | 0.007431 | 0.020548 |
| PTPRVP    | 1q32.1        | 0.136764 | 0.007432 | 0.020548 |
| BAZ1A     | 14q13.1-q13.2 | 0.13674  | 0.007442 | 0.020575 |
| HAX1      | 1q21.3        | 0.136732 | 0.007446 | 0.020581 |
| TSPAN11   | 12p11.21      | -0.1367  | 0.007461 | 0.02062  |
| LRRC43    | 12q24.31      | -0.13667 | 0.007471 | 0.020646 |

|            |                 |          |          |          |
|------------|-----------------|----------|----------|----------|
| AGO4       | 1p34.3          | -0.13665 | 0.007481 | 0.020671 |
| ELOA       | 1p36.11         | 0.136629 | 0.007491 | 0.020694 |
| GPATCH2    | 1q41            | 0.136628 | 0.007491 | 0.020694 |
| C9ORF135   | 9q21.12         | -0.13658 | 0.007514 | 0.020753 |
| C11ORF95   | 11q13.1         | -0.13657 | 0.007519 | 0.020763 |
| F3         | 1p21.3          | 0.136565 | 0.007519 | 0.020763 |
| RASEF      | 9q21.32         | 0.136559 | 0.007522 | 0.020767 |
| HIST1H2BH  | 6p22.2          | 0.136554 | 0.007524 | 0.02077  |
| MAGEA9B    | Xq28            | -0.13655 | 0.007526 | 0.020772 |
| TTC28-AS1  | 22q12.1         | 0.136538 | 0.007531 | 0.020784 |
| OSGEP      | 14q11.2         | 0.136526 | 0.007537 | 0.020796 |
| MROH8      | 20q11.23        | -0.13648 | 0.007555 | 0.020844 |
| GBF1       | 10q24.32        | 0.136481 | 0.007557 | 0.020845 |
| USP47      | 11p15.3         | -0.13647 | 0.00756  | 0.020853 |
| NFRKB      | 11q24.3         | 0.136441 | 0.007575 | 0.020889 |
| EXOC4      | 7q33            | -0.13642 | 0.007586 | 0.020918 |
| ADAMTS1    | 21q21.3         | -0.1364  | 0.007593 | 0.020935 |
| MED18      | 1p35.3          | -0.13639 | 0.007599 | 0.020947 |
| MGAT4A     | 2q11.2          | -0.13638 | 0.007603 | 0.020957 |
| G3BP1      | 5q33.1          | 0.136372 | 0.007605 | 0.020959 |
| NYNRIN     | 14q12           | -0.13636 | 0.00761  | 0.020968 |
| TAPBP      | 6p21.32         | 0.13636  | 0.00761  | 0.020968 |
| PCDHGA2    | 5q31.3          | -0.13635 | 0.007615 | 0.020977 |
| CD58       | 1p13.1          | -0.13635 | 0.007616 | 0.020977 |
| LRWD1      | 7q22.1          | 0.136346 | 0.007617 | 0.020977 |
| PLA2G6     | 22q13.1         | 0.136293 | 0.007641 | 0.02104  |
| AKR1C2     | 10p15.1         | -0.13626 | 0.007655 | 0.021076 |
| GATA5      | 20q13.33        | -0.13626 | 0.007657 | 0.021079 |
| MRTFA      | 22q13.1-q13.2   | -0.13625 | 0.007659 | 0.021082 |
| SLC25A1    | 22q11.21        | 0.136245 | 0.007662 | 0.021087 |
| LIMCH1     | 4p13            | -0.13623 | 0.00767  | 0.021107 |
| CD248      | 11q13.2         | -0.13622 | 0.007672 | 0.021107 |
| ZNF607     | 19q13.12        | 0.136222 | 0.007673 | 0.021107 |
| HIVEP2     | 6q24.2          | -0.13622 | 0.007675 | 0.021109 |
| CHI3L1     | 1q32.1          | -0.13622 | 0.007676 | 0.021109 |
| TOE1       | 1p34.1          | 0.13621  | 0.007678 | 0.021114 |
| TMEM176A   | 7q36.1          | -0.13616 | 0.007701 | 0.021174 |
| GREB1      | 2p25.1          | -0.13613 | 0.007714 | 0.021204 |
| GID4       | 17p11.2 17p11.2 | -0.13613 | 0.007715 | 0.021204 |
| ZYG11A     | 1p32.3          | -0.13613 | 0.007715 | 0.021204 |
| HSPA9      | 5q31.2          | 0.136117 | 0.00772  | 0.021214 |
| CCDC102B   | 18q22.1-q22.2   | -0.13611 | 0.007722 | 0.021218 |
| APOL4      | 22q12.3         | -0.1361  | 0.007729 | 0.021232 |
| TUBB1      | 20q13.32        | 0.136087 | 0.007734 | 0.021243 |
| SAGE1      | Xq26.3          | -0.13606 | 0.007746 | 0.021273 |
| SKAP2      | 7p15.2          | -0.13606 | 0.007748 | 0.021276 |
| TMEM161A   | 19p13.11        | 0.136019 | 0.007764 | 0.021319 |
| CCDC181    | 1q24.2          | -0.13601 | 0.007769 | 0.02133  |
| KCTD7      | 7q11.21         | -0.136   | 0.007771 | 0.021332 |
| CYTIP      | 2q24.1          | -0.136   | 0.007774 | 0.021333 |
| CABYR      | 18q11.2         | -0.136   | 0.007774 | 0.021333 |
| EPB41L2    | 6q23.1-q23.2    | 0.135979 | 0.007783 | 0.021355 |
| DICER1-AS1 | 14q32.13        | 0.135937 | 0.007802 | 0.021405 |
| MFS10      | 4p16.3          | 0.135923 | 0.007808 | 0.021419 |
| SLC25A53   | Xq22.2          | -0.13591 | 0.007813 | 0.021429 |
| PMS1       | 2q32.2          | 0.135903 | 0.007818 | 0.021439 |
| SLAMF9     | 1q23.2          | -0.1359  | 0.007821 | 0.021444 |
| HEATR3     | 16q12.1         | 0.13589  | 0.007823 | 0.021446 |

|           |              |          |          |          |
|-----------|--------------|----------|----------|----------|
| HAVCR1P1  | 19p12        | -0.13589 | 0.007824 | 0.021446 |
| WDR41     | 5q13.3-q14.1 | -0.13587 | 0.007833 | 0.021469 |
| KRTAP3-1  | 17q21.2      | -0.13585 | 0.00784  | 0.021484 |
| C18ORF21  | 18q12.2      | -0.13584 | 0.007848 | 0.021503 |
| ZBTB37    | 1q25.1       | 0.135817 | 0.007857 | 0.021526 |
| MOV10L1   | 22q13.33     | -0.13578 | 0.007876 | 0.021576 |
| SLC27A3   | 1q21.3       | 0.135757 | 0.007885 | 0.021595 |
| LRPAP1    | 4p16.3       | -0.13575 | 0.007886 | 0.021595 |
| GNAT1     | 3p21.31      | 0.135753 | 0.007887 | 0.021595 |
| CLEC17A   | 19p13.12     | -0.13574 | 0.007891 | 0.021604 |
| CACFD1    | 9q34.2       | -0.13571 | 0.007906 | 0.021639 |
| BLOC1S2   | 10q24.31     | -0.13571 | 0.007906 | 0.021639 |
| TCHHL1    | 1q21.3       | -0.13563 | 0.007945 | 0.021742 |
| KCNN3     | 1q21.3       | -0.13563 | 0.007946 | 0.021742 |
| MPPE1     | 18p11.21     | -0.13561 | 0.007951 | 0.021755 |
| NR2C2AP   | 19p13.11     | 0.135609 | 0.007954 | 0.021757 |
| AIPL1     | 17p13.2      | 0.135578 | 0.007968 | 0.021791 |
| IDH2      | 15q26.1      | 0.135578 | 0.007968 | 0.021791 |
| JAG2      | 14q32.33     | 0.135537 | 0.007987 | 0.021841 |
| IL1RL2    | 2q12.1       | 0.135485 | 0.008011 | 0.021904 |
| PLEC      | 8q24.3       | 0.135475 | 0.008016 | 0.021914 |
| HIST1H1T  | 6p22.2       | 0.135468 | 0.008019 | 0.021917 |
| SEC14L4   | 22q12.2      | -0.13547 | 0.008019 | 0.021917 |
| TMEM248   | 7q11.21      | -0.13545 | 0.008026 | 0.021931 |
| NCKIPSD   | 3p21.31      | 0.135452 | 0.008027 | 0.021931 |
| NPB       | 17q25.3      | 0.135449 | 0.008028 | 0.021932 |
| HIST1H2AC | 6p22.2       | -0.13544 | 0.008034 | 0.021946 |
| STAC      | 3p22.3-p22.2 | -0.13543 | 0.008037 | 0.021949 |
| SHB       | 9p13.1       | 0.135382 | 0.00806  | 0.022008 |
| ADCY1     | 7p12.3       | -0.13538 | 0.008061 | 0.022008 |
| DDX56     | 7p13         | 0.13531  | 0.008094 | 0.022095 |
| PLEKHH3   | 17q21.2      | 0.135295 | 0.008101 | 0.022112 |
| CNBP      | 3q21.3       | -0.13529 | 0.008104 | 0.022117 |
| CYB5R3    | 22q13.2      | -0.13528 | 0.008108 | 0.022127 |
| SIGLEC10  | 19q13.41     | -0.13526 | 0.00812  | 0.022154 |
| EXOSC7    | 3p21.31      | 0.135253 | 0.008121 | 0.022154 |
| MGC16275  | 17q25.1      | -0.13524 | 0.008129 | 0.022173 |
| FAM98C    | 19q13.2      | 0.135227 | 0.008133 | 0.022183 |
| PNPT1     | 2p16.1       | 0.135222 | 0.008135 | 0.022185 |
| RTP1      | 3q27.3       | -0.13521 | 0.008143 | 0.022204 |
| FOXI2     | 10q26.2      | -0.1352  | 0.008148 | 0.022213 |
| GTPBP8    | 3q13.2       | -0.13516 | 0.008166 | 0.022259 |
| CAPG      | 2p11.2       | -0.1351  | 0.008193 | 0.022329 |
| TMED8     | 14q24.3      | 0.135092 | 0.008198 | 0.02234  |
| RAD17     | 5q13.2       | -0.13502 | 0.008234 | 0.022436 |
| RNF31     | 14q12        | 0.134988 | 0.008248 | 0.02247  |
| SSR3      | 3q25.31      | -0.13497 | 0.008257 | 0.022492 |
| TMEM39A   | 3q13.33      | -0.13495 | 0.008268 | 0.022519 |
| LIPT2     | 11q13.4      | 0.134929 | 0.008276 | 0.022537 |
| KLHL2     | 4q32.3       | -0.13492 | 0.008279 | 0.022542 |
| CAMK1G    | 1q32.2       | -0.13492 | 0.008282 | 0.022549 |
| MIF4GD    | 17q25.1      | -0.13489 | 0.008292 | 0.022574 |
| RAB13     | 1q21.3       | -0.13485 | 0.008313 | 0.022626 |
| CCN3      | 8q24.12      | -0.13483 | 0.008325 | 0.022656 |
| PIN1      | 19p13.2      | 0.134816 | 0.00833  | 0.022667 |
| ZIC1      | 3q24         | -0.13481 | 0.008333 | 0.022671 |
| PCDHGA8   | 5q31.3       | -0.1348  | 0.008338 | 0.02268  |
| ZZZ3      | 1p31.1       | -0.1348  | 0.008338 | 0.02268  |

|            |               |          |          |          |
|------------|---------------|----------|----------|----------|
| PCDH12     | 5q31.3        | -0.13479 | 0.008345 | 0.022696 |
| DSG1       | 18q12.1       | -0.13478 | 0.008347 | 0.022696 |
| PMF1       | 1q22          | 0.13478  | 0.008348 | 0.022696 |
| PXDN       | 2p25.3        | -0.13478 | 0.008349 | 0.022696 |
| AGRP       | 16q22.1       | -0.13476 | 0.008359 | 0.02272  |
| CD200      | 3q13.2        | -0.13476 | 0.00836  | 0.02272  |
| GOLGA7B    | 10q24.2       | -0.13474 | 0.008366 | 0.022734 |
| PFKFB3     | 10p15.1       | 0.134729 | 0.008373 | 0.022749 |
| GLMP       | 1q22          | -0.1347  | 0.008386 | 0.022781 |
| FBXO24     | 7q22.1        | 0.134689 | 0.008392 | 0.022795 |
| KLHL26     | 19p13.11      | 0.134685 | 0.008394 | 0.022797 |
| ALAD       | 9q32          | -0.13467 | 0.0084   | 0.02281  |
| MAMLD1     | Xq28          | -0.13466 | 0.008408 | 0.02283  |
| ALKBH8     | 11q22.3       | -0.13465 | 0.008413 | 0.022839 |
| PPP1R18    | 6p21.33       | -0.13462 | 0.008425 | 0.022869 |
| NDRG4      | 16q21         | -0.1346  | 0.008435 | 0.022892 |
| SPATS1     | 6p21.1        | -0.1346  | 0.008437 | 0.022895 |
| NRSN2      | 20p13         | -0.13459 | 0.00844  | 0.022897 |
| HK2        | 2p12          | 0.134592 | 0.00844  | 0.022897 |
| RNF128     | Xq22.3        | -0.13458 | 0.008448 | 0.022915 |
| LRRC7      | 1p31.1        | -0.13453 | 0.00847  | 0.022974 |
| MS4A2      | 11q12.1       | -0.13453 | 0.008473 | 0.022977 |
| IFI30      | 19p13.11      | -0.13451 | 0.008482 | 0.023    |
| ITGA10     | 1q21.1        | -0.1345  | 0.008485 | 0.023005 |
| FGFBP3     | 10q23.32      | 0.134478 | 0.008496 | 0.023031 |
| AP5S1      | 20p13         | -0.13447 | 0.008502 | 0.023044 |
| DHCR7      | 11q13.4       | 0.134456 | 0.008507 | 0.023052 |
| UBE2D3     | 4q24          | -0.13445 | 0.008507 | 0.023052 |
| PSG7       | 19q13.31      | -0.13443 | 0.008521 | 0.023085 |
| VTN        | 17q11.2       | -0.1344  | 0.008533 | 0.023114 |
| XKR4       | 8q12.1        | -0.13439 | 0.008537 | 0.023123 |
| SEPTIN14   | 7p11.2        | -0.13439 | 0.008538 | 0.023123 |
| DNAJC8     | 1p35.3        | -0.13438 | 0.008543 | 0.023134 |
| POLR1B     | 2q14.1        | 0.134379 | 0.008545 | 0.023134 |
| PRSS41     | 16p13.3       | 0.134359 | 0.008555 | 0.023156 |
| CCDC174    | 3p25.1        | -0.13436 | 0.008555 | 0.023156 |
| CCDC40     | 17q25.3       | 0.134352 | 0.008558 | 0.023162 |
| SEZ6L2     | 16p11.2       | -0.13433 | 0.008567 | 0.023183 |
| CALCOCO1   | 12q13.13      | -0.13432 | 0.008572 | 0.023193 |
| ABLIM3     | 5q32          | -0.13431 | 0.008581 | 0.023211 |
| PPP1R16B   | 20q11.23      | -0.13431 | 0.008581 | 0.023211 |
| CCDC124    | 19p13.11      | 0.134288 | 0.00859  | 0.023232 |
| PCCA       | 13q32.3       | -0.13426 | 0.008602 | 0.023262 |
| KCNJ4      | 22q13.1       | 0.134259 | 0.008605 | 0.023265 |
| CD96       | 3q13.13-q13.2 | -0.13424 | 0.008614 | 0.023288 |
| TOX        | 8q12.1        | -0.13422 | 0.008622 | 0.023307 |
| RFPL4A     | 19q13.42      | -0.13422 | 0.008626 | 0.023313 |
| TCEANC     | Xp22.2        | -0.13421 | 0.008627 | 0.023313 |
| UPRT       | Xq13.3        | -0.1342  | 0.008633 | 0.023327 |
| GGA3       | 17q25.1       | 0.134199 | 0.008635 | 0.023328 |
| REXO2      | 11q23.2       | -0.13417 | 0.008649 | 0.023363 |
| LINC00032  | 9p21.2        | 0.134093 | 0.008688 | 0.023465 |
| LRRC61     | 7q36.1        | -0.13408 | 0.008697 | 0.023486 |
| BDNF       | 11p14.1       | -0.13405 | 0.008711 | 0.023522 |
| LSM2       | 6p21.33       | 0.134032 | 0.008719 | 0.023537 |
| OCSTAMP    | 20q13.12      | -0.13403 | 0.008719 | 0.023537 |
| GABPB1-AS1 | 15q21.2       | 0.134016 | 0.008727 | 0.023554 |
| MPP6       | 7p15.3        | 0.133974 | 0.008748 | 0.023609 |

|           |              |          |          |          |
|-----------|--------------|----------|----------|----------|
| ZNF514    | 2q11.1       | 0.133955 | 0.008758 | 0.023631 |
| MIA2      | 14q21.1      | -0.13395 | 0.008759 | 0.023632 |
| HOXB2     | 17q21.32     | -0.13393 | 0.008771 | 0.02366  |
| TWNK      | 10q24.31     | 0.133904 | 0.008784 | 0.023691 |
| CBWD6     | 9p11.2       | 0.133899 | 0.008786 | 0.023695 |
| ZNF181    | 19q13.11     | -0.1339  | 0.008788 | 0.023696 |
| KCNJ2     | 17q24.3      | -0.13385 | 0.008812 | 0.023758 |
| TM4SF1    | 3q25.1       | -0.13384 | 0.008814 | 0.023762 |
| DPAGT1    | 11q23.3      | 0.133838 | 0.008817 | 0.023766 |
| RDH5      | 12q13.2      | -0.13383 | 0.008819 | 0.023768 |
| PTBP2     | 1p21.3       | -0.13381 | 0.008834 | 0.023805 |
| OBSL1     | 2q35         | -0.1338  | 0.008835 | 0.023805 |
| RBBP5     | 1q32.1       | 0.133792 | 0.008841 | 0.023816 |
| NME1-NME2 | 17q21.33     | 0.133762 | 0.008856 | 0.023854 |
| FZD2      | 17q21.31     | -0.13374 | 0.008869 | 0.023885 |
| HIST1H3C  | 6p22.2       | 0.133711 | 0.008883 | 0.02392  |
| FKBP10    | 17q21.2      | -0.1337  | 0.008888 | 0.023931 |
| TBC1D25   | Xp11.23      | -0.13366 | 0.00891  | 0.023987 |
| PRPSAP2   | 17p11.2      | -0.13364 | 0.008921 | 0.024014 |
| ANKRD1    | 10q23.31     | -0.13362 | 0.008928 | 0.024027 |
| PSG6      | 19q13.31     | -0.13362 | 0.008928 | 0.024027 |
| ZNF705A   | 12p13.31     | -0.1336  | 0.008937 | 0.024048 |
| COX14     | 12q13.12     | -0.1336  | 0.00894  | 0.024053 |
| SATB1     | 3p24.3       | -0.13359 | 0.008945 | 0.02406  |
| ATP9A     | 20q13.2      | -0.13359 | 0.008945 | 0.02406  |
| EMC4      | 15q14        | -0.13359 | 0.008947 | 0.024061 |
| LRP1B     | 2q22.1-q22.2 | -0.13358 | 0.008951 | 0.024063 |
| LIG3      | 17q12        | 0.133577 | 0.008951 | 0.024063 |
| TNNT2     | 1q32.1       | 0.133577 | 0.008952 | 0.024063 |
| BAHCC1    | 17q25.3      | 0.133572 | 0.008954 | 0.024066 |
| RPLP0P2   | 11q12.2      | -0.13357 | 0.008956 | 0.024068 |
| TECR      | 19p13.12     | 0.133491 | 0.008996 | 0.024173 |
| TMEM133   | 11q22.1      | -0.13347 | 0.009009 | 0.024204 |
| WDR45     | Xp11.23      | -0.13345 | 0.009018 | 0.024227 |
| FLNB      | 3p14.3       | 0.133441 | 0.009022 | 0.024233 |
| EID3      | 12q23.3      | -0.13342 | 0.00903  | 0.024252 |
| ZNF174    | 16p13.3      | -0.1334  | 0.009041 | 0.024278 |
| RXYLT1    | 12q14.2      | -0.13338 | 0.009055 | 0.024313 |
| THPO      | 3q27.1       | -0.13335 | 0.009067 | 0.024342 |
| PDLIM7    | 5q35.3       | -0.13334 | 0.009073 | 0.02435  |
| TBC1D14   | 4p16.1       | 0.133344 | 0.009073 | 0.02435  |
| IRGQ      | 19q13.31     | 0.133338 | 0.009076 | 0.024354 |
| KIF5B     | 10p11.22     | 0.133325 | 0.009083 | 0.02437  |
| MAP1LC3A  | 20q11.22     | -0.13332 | 0.009087 | 0.024378 |
| CD3G      | 11q23.3      | -0.13331 | 0.009088 | 0.024379 |
| SIRT2     | 19q13.2      | -0.13331 | 0.009091 | 0.024382 |
| VPS35L    | 16p12.3      | -0.1333  | 0.009097 | 0.024395 |
| LSM10     | 1p34.3       | -0.13327 | 0.009111 | 0.024428 |
| TNFRSF4   | 1p36.33      | -0.13324 | 0.00913  | 0.024477 |
| LINC00475 | 9q22.31      | -0.13323 | 0.009135 | 0.024487 |
| SCAI      | 9q33.3       | 0.133219 | 0.009138 | 0.024493 |
| PPM1K     | 4q22.1       | -0.1332  | 0.00915  | 0.024522 |
| LINC01138 | 1q21.2       | -0.13319 | 0.009155 | 0.02453  |
| EFCAB12   | 3q21.3       | 0.133186 | 0.009156 | 0.02453  |
| ZNF34     | 8q24.3       | -0.13311 | 0.009196 | 0.024634 |
| RIMS4     | 20q13.12     | -0.13311 | 0.009198 | 0.024638 |
| SEMA5B    | 3q21.1       | -0.13308 | 0.009211 | 0.024668 |
| ZNF148    | 3q21.2       | -0.13308 | 0.009214 | 0.024672 |



|              |                    |          |          |          |
|--------------|--------------------|----------|----------|----------|
| CGN          | 1q21.3             | 0.133054 | 0.009225 | 0.0247   |
| ZDBF2        | 2q33.3             | -0.13304 | 0.009231 | 0.024703 |
| CCDC198      | 14q22.3            | -0.13304 | 0.009231 | 0.024703 |
| ARFGAP3      | 22q13.2            | -0.13304 | 0.009232 | 0.024703 |
| GRASP        | 12q13.13           | -0.13304 | 0.009232 | 0.024703 |
| SMPX         | Xp22.12            | -0.13304 | 0.009233 | 0.024703 |
| DNAJC24      | 11p13              | -0.13304 | 0.009234 | 0.024703 |
| ZNF302       | 19q13.11           | -0.133   | 0.009252 | 0.024748 |
| CMPK1        | 1p33               | -0.13299 | 0.009262 | 0.024772 |
| MLPH         | 2q37.3             | 0.132964 | 0.009273 | 0.024798 |
| HNRNPC       | 14q11.2            | 0.132955 | 0.009278 | 0.024808 |
| FAXC         | 6q16.2             | -0.13295 | 0.009279 | 0.024808 |
| RTF2         | 20q13.31           | -0.13295 | 0.009283 | 0.024815 |
| ZNF829       | 19q13.12           | -0.13294 | 0.009288 | 0.024824 |
| LRRC1        | 6p12.1             | 0.132931 | 0.009291 | 0.02483  |
| ZDHHC1       | 16q22.1            | -0.13292 | 0.009295 | 0.024836 |
| VSTM1        | 19q13.42           | -0.13291 | 0.009303 | 0.024854 |
| SMOX         | 20p13              | -0.13291 | 0.009304 | 0.024855 |
| COA8         | 14q32.33           | -0.13286 | 0.009332 | 0.024925 |
| GLTP         | 12q24.11           | -0.13285 | 0.009336 | 0.024931 |
| POLL         | 10q24.32           | 0.132846 | 0.009336 | 0.024931 |
| PRELID1      | 5q35.3             | 0.132839 | 0.00934  | 0.024938 |
| HECTD2       | 10q23.32           | -0.13283 | 0.009343 | 0.024941 |
| HSPB3        | 5q11.2             | -0.13283 | 0.009347 | 0.024942 |
| ACKR2        | 3p22.1             | -0.13283 | 0.009347 | 0.024942 |
| P2RY8        | Xp22.33 and Yp11.2 | -0.13283 | 0.009348 | 0.024942 |
| THRAP3       | 1p34.3             | 0.132823 | 0.009349 | 0.024942 |
| IPP          | 1p34.1             | -0.13282 | 0.009349 | 0.024942 |
| ZNF341       | 20q11.22           | 0.132811 | 0.009355 | 0.024955 |
| MAP3K3       | 17q23.3            | -0.13281 | 0.009357 | 0.024955 |
| PTP4A3       | 8q24.3             | -0.1328  | 0.009359 | 0.024958 |
| IPCEF1       | 6q25.2             | -0.13279 | 0.009365 | 0.02497  |
| SLAMF7       | 1q23.3             | -0.13275 | 0.009388 | 0.02503  |
| TOM1L1       | 17q22              | -0.13272 | 0.009403 | 0.025065 |
| SNAR-B2      | 19q13.33           | 0.132691 | 0.00942  | 0.025104 |
| GRIK1        | 21q21.3            | -0.13269 | 0.00942  | 0.025104 |
| TMEM105      | 17q25.3            | 0.132689 | 0.009421 | 0.025104 |
| RGPD8        | 2q14.1             | 0.132687 | 0.009423 | 0.025104 |
| C2CD4A       | 15q22.2            | 0.132653 | 0.009441 | 0.02515  |
| NAT2         | 8p22               | -0.13264 | 0.009447 | 0.025164 |
| TAS2R50      | 12p13.2            | 0.132633 | 0.009452 | 0.025172 |
| ENG          | 9q34.11            | -0.13263 | 0.009454 | 0.025175 |
| PFDN4        | 20q13.2            | -0.13263 | 0.009455 | 0.025175 |
| C21ORF62     | 21q22.11           | -0.1326  | 0.009469 | 0.025206 |
| FAM160A1     | 4q31.3             | 0.132583 | 0.009479 | 0.02523  |
| RPH3A        | 12q24.13           | -0.13257 | 0.009483 | 0.025239 |
| PGBD1        | 6p22.1             | -0.13256 | 0.009491 | 0.025256 |
| FCRLB        | 1q23.3             | -0.13256 | 0.009492 | 0.025256 |
| CHD7         | 8q12.2             | 0.132547 | 0.009498 | 0.025269 |
| HAAO         | 2p21               | -0.13253 | 0.009505 | 0.025284 |
| SNORA62      | 3p22.1             | 0.132528 | 0.009509 | 0.02529  |
| GLUL         | 1q25.3             | -0.13252 | 0.009513 | 0.025297 |
| TMEM131      | 2q11.2             | -0.13251 | 0.009519 | 0.025311 |
| LOC100272217 | 9q34.11            | 0.132486 | 0.009532 | 0.025341 |
| MARK3        | 14q32.32-q32.33    | 0.132456 | 0.009548 | 0.025382 |
| TRAF5        | 1q32.3             | 0.132433 | 0.009561 | 0.025411 |
| AGAP1        | 2q37.2             | 0.132423 | 0.009566 | 0.025423 |
| UBN2         | 7q34               | 0.132411 | 0.009573 | 0.025437 |

|            |                 |          |          |          |
|------------|-----------------|----------|----------|----------|
| C16ORF54   | 16p11.2         | -0.13239 | 0.009587 | 0.02547  |
| PCDH17     | 13q21.1         | -0.13237 | 0.009593 | 0.025484 |
| CYP4A11    | 1p33            | -0.13235 | 0.009608 | 0.025521 |
| TLR5       | 1q41            | -0.13232 | 0.009623 | 0.025553 |
| KLHL11     | 17q21.2         | 0.13232  | 0.009623 | 0.025553 |
| COQ7       | 16p12.3         | 0.132303 | 0.009632 | 0.025575 |
| B4GALT1    | 9p21.1          | -0.13229 | 0.009638 | 0.025585 |
| FSTL4      | 5q31.1          | -0.13229 | 0.009639 | 0.025586 |
| TIGD1      | 2q37.1          | 0.132258 | 0.009657 | 0.02563  |
| GCSAML-AS1 | 1q44            | -0.13225 | 0.009662 | 0.02564  |
| SPOPL      | 2q22.1          | -0.13224 | 0.009666 | 0.025647 |
| AFAP1L1    | 5q32            | -0.13223 | 0.009672 | 0.025659 |
| HNRNPDL    | 4q21.22         | 0.132229 | 0.009673 | 0.025659 |
| ZNF507     | 19q13.11        | 0.13222  | 0.009678 | 0.025669 |
| LINC01555  | 1p22.3          | -0.13219 | 0.009694 | 0.025704 |
| SHLD2      | 10q23.2         | 0.132191 | 0.009694 | 0.025704 |
| CTSC       | 11q14.2         | -0.13216 | 0.009711 | 0.025746 |
| PTPRQ      | 12q21.31        | -0.13215 | 0.009716 | 0.025756 |
| BREA2      | 8q24.3          | 0.13215  | 0.009717 | 0.025756 |
| LILRA5     | 19q13.42        | -0.13215 | 0.009719 | 0.025757 |
| NUDT19     | 19q13.11        | 0.132127 | 0.00973  | 0.025783 |
| TAS2R20    | 12p13.2         | 0.132114 | 0.009737 | 0.025799 |
| TBC1D17    | 19q13.33        | -0.13208 | 0.009756 | 0.025844 |
| ZMYM4      | 1p34.3          | -0.13207 | 0.009764 | 0.025861 |
| FADS6      | 17q25.1         | -0.13206 | 0.009769 | 0.025872 |
| FAM110D    | 1p36.11         | -0.13206 | 0.00977  | 0.025872 |
| OR51I2     | 11p15.4         | 0.132022 | 0.009789 | 0.025915 |
| PSIP1      | 9p22.3          | 0.132019 | 0.009791 | 0.025915 |
| FFAR3      | 19q13.12        | -0.13202 | 0.009792 | 0.025915 |
| IGFL3      | 19q13.32        | -0.13201 | 0.009794 | 0.025915 |
| DOCK2      | 5q35.1          | -0.13201 | 0.009795 | 0.025915 |
| IKZF5      | 10q26.13        | -0.13201 | 0.009796 | 0.025915 |
| TFPI2      | 7q21.3          | -0.13201 | 0.009796 | 0.025915 |
| RPS14      | 5q33.1          | -0.13199 | 0.009805 | 0.025935 |
| PPP4R3B    | 2p16.1          | -0.13197 | 0.009816 | 0.025963 |
| MIR4697HG  | 11q25           | 0.131969 | 0.009818 | 0.025963 |
| PHYKPL     | 5q35.3          | 0.131968 | 0.009819 | 0.025963 |
| SFTPD      | 10q22.3         | -0.13193 | 0.009842 | 0.026021 |
| SLCO2B1    | 11q13.4         | -0.13191 | 0.009849 | 0.026031 |
| EIF1       | 17q21.2         | -0.13191 | 0.00985  | 0.026031 |
| TCF20      | 22q13.2 22q13.3 | 0.13191  | 0.009852 | 0.026031 |
| WHAMM      | 15q25.2         | 0.131907 | 0.009853 | 0.026031 |
| PREX2      | 8q13.2          | -0.13191 | 0.009854 | 0.026031 |
| PSG5       | 19q13.31        | -0.13191 | 0.009854 | 0.026031 |
| EDN2       | 1p34.2          | -0.1319  | 0.009857 | 0.026036 |
| C8ORF37    | 8q22.1          | -0.13188 | 0.009866 | 0.026057 |
| LLGL2      | 17q25.1         | 0.131868 | 0.009875 | 0.026077 |
| TDO2       | 4q32.1          | -0.13185 | 0.009883 | 0.026095 |
| EIF2AK3    | 2p11.2          | -0.13184 | 0.009894 | 0.026119 |
| ADCK1      | 14q24.3         | 0.131821 | 0.009902 | 0.026137 |
| TRIM55     | 8q13.1          | -0.13182 | 0.009903 | 0.026137 |
| B4GALT5    | 20q13.13        | -0.13179 | 0.009919 | 0.026175 |
| TXNDC11    | 16p13.13        | -0.13176 | 0.009934 | 0.026211 |
| ZNF503     | 10q22.2         | -0.13175 | 0.009943 | 0.026232 |
| ENTPD2     | 9q34.3          | 0.131719 | 0.00996  | 0.026273 |
| ZNF720     | 16p11.2         | -0.13169 | 0.009976 | 0.026312 |
| COL4A2     | 13q34           | -0.13166 | 0.009991 | 0.026346 |
| SPACA3     | 17q11.2         | -0.13166 | 0.009992 | 0.026346 |

|           |                 |          |          |          |
|-----------|-----------------|----------|----------|----------|
| POLM      | 7p13            | 0.131661 | 0.009993 | 0.026346 |
| SDHD      | 11q23.1         | -0.13165 | 0.009997 | 0.026355 |
| TBXA2R    | 19p13.3         | -0.13161 | 0.010019 | 0.026409 |
| TSPAN12   | 7q31.31         | -0.13159 | 0.010036 | 0.026449 |
| ZNF641    | 12q13.11        | -0.13156 | 0.010049 | 0.026481 |
| TLCD4     | 1p21.3          | -0.13155 | 0.010058 | 0.0265   |
| ZIC5      | 13q32.3         | 0.131527 | 0.01007  | 0.026528 |
| CR1       | 1q32.2          | -0.13152 | 0.010074 | 0.026536 |
| TAS2R3    | 7q34            | 0.131505 | 0.010082 | 0.026554 |
| RAB40C    | 16p13.3         | 0.131495 | 0.010088 | 0.026562 |
| CXXC1     | 18q21.1         | 0.131495 | 0.010088 | 0.026562 |
| PSPN      | 19p13.3         | 0.131475 | 0.010099 | 0.026588 |
| LAMP1     | 13q34           | -0.13147 | 0.010103 | 0.026596 |
| CWF19L1   | 10q24.31        | 0.131458 | 0.010109 | 0.026604 |
| ZMYM6     | 1p34.3          | -0.13146 | 0.010109 | 0.026604 |
| TRIM72    | 16p11.2         | 0.131455 | 0.010111 | 0.026605 |
| KDM4D     | 11q21           | -0.13145 | 0.010114 | 0.026611 |
| SV2C      | 5q13.3          | -0.13144 | 0.010121 | 0.026624 |
| PRKCE     | 2p21            | -0.13142 | 0.010128 | 0.026637 |
| DNM1L     | 12p11.21        | 0.131424 | 0.010129 | 0.026637 |
| ABTB1     | 3q21.3          | -0.13138 | 0.010156 | 0.026705 |
| CLEC18B   | 16q23.1         | 0.131374 | 0.010158 | 0.026707 |
| CEP164    | 11q23.3         | 0.131369 | 0.01016  | 0.02671  |
| EFTUD2    | 17q21.31        | 0.131359 | 0.010166 | 0.026723 |
| ADARB2    | 10p15.3         | -0.13135 | 0.010172 | 0.026734 |
| HNRNPA3P1 | 10q11.21        | 0.131329 | 0.010184 | 0.026761 |
| CHD9      | 16q12.2         | -0.13133 | 0.010186 | 0.026763 |
| MZT1      | 13q21.33        | 0.131295 | 0.010203 | 0.026806 |
| AKIRIN2   | 6q15            | -0.13129 | 0.010207 | 0.026813 |
| CHAC2     | 2p16.2          | 0.13128  | 0.010212 | 0.026823 |
| G6PC      | 17q21.31        | -0.13125 | 0.010232 | 0.026869 |
| MAFG      | 17q25.3         | 0.131238 | 0.010237 | 0.026879 |
| RHOA      | 1q42.13         | -0.13123 | 0.010244 | 0.026895 |
| PLCL2     | 3p24.3          | -0.13122 | 0.010249 | 0.026906 |
| TMCC1     | 3q22.1          | -0.1312  | 0.010259 | 0.026926 |
| CYB5RL    | 1p32.3          | 0.131196 | 0.010261 | 0.026929 |
| KRTCAP2   | 1q22            | 0.131174 | 0.010274 | 0.02696  |
| ZNF462    | 9q31.2          | 0.131171 | 0.010276 | 0.026961 |
| NRSN1     | 6p22.3          | -0.13117 | 0.010278 | 0.026964 |
| SULT6B1   | 2p22.2          | -0.13115 | 0.010286 | 0.026982 |
| SMAD9     | 13q13.3         | -0.13114 | 0.010296 | 0.027004 |
| TTF1      | 9q34.13         | 0.131119 | 0.010306 | 0.027026 |
| UGCG      | 9q31.3          | -0.13111 | 0.010309 | 0.02703  |
| SLC30A4   | 15q21.1 15q21.1 | -0.1311  | 0.010317 | 0.027047 |
| YIPF3     | 6p21.1          | -0.13108 | 0.010326 | 0.027068 |
| GRB2      | 17q25.1         | -0.13103 | 0.010359 | 0.02715  |
| RPL5      | 1p22.1          | -0.13102 | 0.010366 | 0.027167 |
| TDP1      | 14q32.11        | 0.131011 | 0.010369 | 0.027171 |
| TSFM      | 12q14.1         | 0.131    | 0.010376 | 0.027185 |
| SLC22A23  | 6p25.2          | 0.130955 | 0.010403 | 0.027251 |
| SENP7     | 3q12.3          | -0.13095 | 0.010404 | 0.027252 |
| CMTM1     | 16q21           | 0.130937 | 0.010414 | 0.027272 |
| METTL14   | 4q26            | -0.13092 | 0.010425 | 0.0273   |
| PAGE4     | Xp11.23         | -0.13091 | 0.010427 | 0.027301 |
| TGOLN2    | 2p11.2          | -0.13091 | 0.010431 | 0.027307 |
| CXCL13    | 4q21.1          | -0.13088 | 0.010445 | 0.027341 |
| SYTL3     | 6q25.3          | -0.13088 | 0.010449 | 0.027348 |
| PPFIBP1   | 12p11.23-p11.22 | -0.13087 | 0.010455 | 0.027359 |

|           |                 |          |          |          |
|-----------|-----------------|----------|----------|----------|
| CTNS      | 17p13.2         | -0.13083 | 0.010475 | 0.027409 |
| SLC7A8    | 14q11.2         | -0.13082 | 0.010482 | 0.027421 |
| PLBD2     | 12q24.13        | -0.13082 | 0.010483 | 0.027421 |
| ACOT11    | 1p32.3          | 0.130815 | 0.010486 | 0.027426 |
| TSPAN13   | 7p21.1          | 0.130808 | 0.01049  | 0.027433 |
| KPRP      | 1q21.3          | -0.1308  | 0.010493 | 0.027437 |
| TSPAN5    | 4q23            | -0.1308  | 0.010495 | 0.027439 |
| ARPC3     | 12q24.11        | -0.13077 | 0.010513 | 0.027482 |
| RCOR2     | 11q13.1         | 0.130759 | 0.010519 | 0.027496 |
| EPPIN     | 20q13.12        | -0.13075 | 0.010526 | 0.027508 |
| EPHA7     | 6q16.1          | -0.13074 | 0.010528 | 0.02751  |
| FYB2      | 1p32.2          | -0.13071 | 0.010546 | 0.027553 |
| L3MBTL4   | 18p11.31        | -0.13071 | 0.010547 | 0.027553 |
| PRRG1     | Xp21.1          | -0.13071 | 0.010551 | 0.02756  |
| PCNX1     | 14q24.2         | -0.1307  | 0.010555 | 0.027565 |
| DGAT1     | 8q24.3          | 0.130698 | 0.010555 | 0.027565 |
| IL6ST     | 5q11.2          | -0.1307  | 0.010557 | 0.027565 |
| KIAA1107  | 1p22.1          | -0.13069 | 0.010561 | 0.027572 |
| KLRF1     | 12p13.31        | -0.13067 | 0.010569 | 0.027591 |
| CYP3A5    | 7q22.1          | 0.130657 | 0.01058  | 0.027615 |
| MYO18A    | 17q11.2         | 0.130652 | 0.010584 | 0.02762  |
| FGA       | 4q31.3          | -0.13065 | 0.010587 | 0.027626 |
| PDCD7     | 15q22.31        | 0.130626 | 0.010599 | 0.027651 |
| DGUOK     | 2p13.1          | -0.13062 | 0.0106   | 0.027651 |
| MT1X      | 16q13           | -0.1306  | 0.010612 | 0.027679 |
| KRTAP10-4 | 21q22.3         | 0.130587 | 0.010622 | 0.027703 |
| BRI3      | 7q21.3          | -0.13058 | 0.010624 | 0.027704 |
| PSMB7     | 9q33.3          | 0.130566 | 0.010635 | 0.027728 |
| REV1      | 2q11.2          | 0.130558 | 0.01064  | 0.027738 |
| NPM2      | 8p21.3          | -0.13049 | 0.010682 | 0.027845 |
| TCTA      | 3p21.31         | -0.13046 | 0.010697 | 0.027879 |
| FRY       | 13q13.1         | -0.13044 | 0.010709 | 0.027907 |
| SLC25A29  | 14q32.2         | 0.130421 | 0.010723 | 0.027939 |
| IL1RAPL1  | Xp21.3-p21.2    | -0.13041 | 0.01073  | 0.027955 |
| C9ORF57   | 9q21.13         | 0.130384 | 0.010745 | 0.027992 |
| DOCK1     | 10q26.2         | -0.13037 | 0.010752 | 0.028005 |
| CEP120    | 5q23.2          | -0.13037 | 0.010755 | 0.028009 |
| TRDN      | 6q22.31         | -0.13036 | 0.010762 | 0.028023 |
| IVL       | 1q21.3          | -0.13034 | 0.010772 | 0.028047 |
| BRF1      | 14q32.33        | 0.130305 | 0.010794 | 0.028097 |
| COX19     | 7p22.3          | 0.130304 | 0.010794 | 0.028097 |
| ALDH1A1   | 9q21.13         | -0.1303  | 0.010798 | 0.028102 |
| MAGEA3    | Xq28            | -0.13028 | 0.010808 | 0.028125 |
| VEZT      | 12q22           | -0.13026 | 0.010822 | 0.028158 |
| PDE3B     | 11p15.2         | -0.13025 | 0.010827 | 0.028168 |
| SNTB1     | 8q24.12         | -0.13025 | 0.010829 | 0.028169 |
| ZSWIM4    | 19p13.13-p13.12 | -0.13024 | 0.010831 | 0.028169 |
| SPDEF     | 6p21.31         | 0.130242 | 0.010832 | 0.028169 |
| ADAM17    | 2p25.1          | -0.1302  | 0.010858 | 0.028232 |
| RANBP10   | 16q22.1         | 0.130165 | 0.010879 | 0.028285 |
| MEN1      | 11q13.1         | 0.130156 | 0.010885 | 0.028295 |
| SLC17A7   | 19q13.33        | -0.13015 | 0.010889 | 0.028299 |
| SNX31     | 8q22.3          | -0.13015 | 0.01089  | 0.028299 |
| TRIM8     | 10q24.32        | -0.13015 | 0.01089  | 0.028299 |
| SLC22A2   | 6q25.3          | -0.13014 | 0.010893 | 0.0283   |
| DESI2     | 1q44            | 0.130141 | 0.010894 | 0.0283   |
| TMEM38B   | 9q31.2          | -0.13013 | 0.010902 | 0.028318 |
| LMX1A     | 1q23.3          | -0.13011 | 0.010913 | 0.028343 |

|           |              |          |          |          |
|-----------|--------------|----------|----------|----------|
| DZIP1L    | 3q22.3       | -0.13009 | 0.010923 | 0.028365 |
| PNMA6A    | Xq28         | -0.13009 | 0.010927 | 0.028372 |
| HEPACAM   | 11q24.2      | -0.13007 | 0.010935 | 0.02839  |
| BTNL8     | 5q35.3       | 0.130071 | 0.010937 | 0.028391 |
| TPP2      | 13q33.1      | 0.130052 | 0.010949 | 0.028418 |
| PAH       | 12q23.2      | -0.13004 | 0.010958 | 0.028438 |
| TAP1      | 6p21.32      | 0.130027 | 0.010964 | 0.028451 |
| RPL41     | 12q13.2      | -0.13    | 0.010984 | 0.028498 |
| SEC14L3   | 22q12.2      | 0.129983 | 0.010992 | 0.028514 |
| PNP       | 14q11.2      | 0.129963 | 0.011004 | 0.028543 |
| RNF40     | 16p11.2      | 0.12995  | 0.011012 | 0.028559 |
| CADM2     | 3p12.1       | -0.12993 | 0.011023 | 0.028584 |
| MCEMP1    | 19p13.2      | -0.12992 | 0.011028 | 0.028594 |
| RBM23     | 14q11.2      | -0.12987 | 0.011061 | 0.028675 |
| ZBTB45    | 19q13.43     | 0.129832 | 0.011086 | 0.028734 |
| DNASE2B   | 1p31.1-p22.3 | -0.12983 | 0.011086 | 0.028734 |
| STAG3L1   | 7q11.23      | 0.129816 | 0.011096 | 0.028755 |
| TEDDM1    | 1q25.3       | 0.129795 | 0.011109 | 0.028785 |
| ADH4      | 4q23         | -0.12977 | 0.011124 | 0.028819 |
| CTCF      | 16q22.1      | 0.129757 | 0.011132 | 0.028838 |
| RASAL2    | 1q25.2       | 0.129741 | 0.011143 | 0.028861 |
| PITX1     | 5q31.1       | 0.12969  | 0.011175 | 0.02894  |
| LINC01341 | 1q44         | 0.129688 | 0.011176 | 0.02894  |
| ALDH3B2   | 11q13.2      | 0.129677 | 0.011183 | 0.028954 |
| EXOC6B    | 2p13.2       | -0.12967 | 0.011185 | 0.028956 |
| ADAMTS17  | 15q26.3      | 0.129652 | 0.011199 | 0.028988 |
| METRNL    | 16p13.3      | 0.129647 | 0.011202 | 0.028992 |
| RPF1      | 1p22.3       | -0.12964 | 0.011206 | 0.029    |
| SPECC1L   | 22q11.23     | -0.12962 | 0.011218 | 0.029027 |
| MORN2     | 2p22.1       | -0.1296  | 0.01123  | 0.029054 |
| ZNF440    | 19p13.2      | 0.129586 | 0.011241 | 0.029077 |
| RBMX      | Xq26.3       | 0.129556 | 0.011259 | 0.029122 |
| ARHGEF33  | 2p22.1       | -0.12955 | 0.011262 | 0.029125 |
| ACBD4     | 17q21.31     | -0.12954 | 0.011271 | 0.029141 |
| PCIF1     | 20q13.12     | -0.12954 | 0.011271 | 0.029141 |
| CDYL2     | 16q23.2      | -0.12953 | 0.011274 | 0.029145 |
| PCDHGA6   | 5q31.3       | -0.12952 | 0.01128  | 0.029157 |
| HSPA1A    | 6p21.33      | 0.1295   | 0.011295 | 0.029192 |
| BRD9      | 5p15.33      | 0.129496 | 0.011297 | 0.029194 |
| LINC01973 | 17q25.3      | -0.12947 | 0.011317 | 0.02924  |
| CTNNDL1   | 20q11.23     | -0.12946 | 0.011321 | 0.029248 |
| H2AFY2    | 10q22.1      | -0.12945 | 0.011327 | 0.029259 |
| PIIP5K2   | 5q21.1       | -0.12944 | 0.011331 | 0.029267 |
| GALNT14   | 2p23.1       | -0.1294  | 0.011358 | 0.02933  |
| CEBPG     | 19q13.11     | 0.1294   | 0.011359 | 0.02933  |
| MYRF      | 11q12.2      | 0.129383 | 0.011369 | 0.029354 |
| ANXA13    | 8q24.13      | -0.12937 | 0.011381 | 0.029379 |
| EXT1      | 8q24.11      | -0.12936 | 0.011383 | 0.029382 |
| CLCN1     | 7q34         | 0.129342 | 0.011396 | 0.02941  |
| IMMP2L    | 7q31.1       | -0.12933 | 0.011403 | 0.029425 |
| TUG1      | 22q12.2      | 0.129326 | 0.011406 | 0.029429 |
| PLAC8L1   | 5q32         | 0.129323 | 0.011408 | 0.029431 |
| USP20     | 9q34.11      | 0.129297 | 0.011425 | 0.029469 |
| IPW       | 15q11.2      | -0.12929 | 0.011431 | 0.029483 |
| RAB11B    | 19p13.2      | -0.12928 | 0.011435 | 0.029488 |
| IDI1      | 10p15.3      | 0.129275 | 0.011439 | 0.029495 |
| MTA3      | 2p21         | -0.12927 | 0.011444 | 0.029501 |
| CCNK      | 14q32.2      | 0.129267 | 0.011444 | 0.029501 |

|          |          |          |          |          |
|----------|----------|----------|----------|----------|
| CTNNAL1  | 9q31.3   | 0.129263 | 0.011447 | 0.029504 |
| UGT2B11  | 4q13.2   | 0.129251 | 0.011454 | 0.029519 |
| CRYGS    | 3q27.3   | 0.129248 | 0.011456 | 0.029521 |
| SVOP     | 12q24.11 | -0.12924 | 0.011459 | 0.029523 |
| TOLLIP   | 11p15.5  | -0.12924 | 0.01146  | 0.029523 |
| CT45A5   | Xq26.3   | -0.1292  | 0.011485 | 0.029583 |
| BSPRY    | 9q32     | 0.129198 | 0.011489 | 0.029589 |
| MOSPD3   | 7q22.1   | -0.12918 | 0.011498 | 0.029609 |
| SPATA25  | 20q13.12 | 0.129139 | 0.011527 | 0.02968  |
| GALE     | 1p36.11  | 0.129135 | 0.011529 | 0.029682 |
| HDAC4    | 2q37.3   | 0.1291   | 0.011552 | 0.029736 |
| ZNF474   | 5q23.2   | -0.12908 | 0.011567 | 0.029768 |
| RHBDD2   | 7q11.23  | -0.12908 | 0.011568 | 0.029768 |
| KRTAP1-1 | 17q21.2  | -0.12907 | 0.01157  | 0.029768 |
| ATF6B    | 6p21.32  | 0.129072 | 0.01157  | 0.029768 |
| APOBEC3H | 22q13.1  | -0.12903 | 0.011598 | 0.029835 |
| LPO      | 17q22    | -0.12902 | 0.011606 | 0.029852 |
| LHB      | 19q13.33 | 0.128989 | 0.011624 | 0.029896 |
| KCND3    | 1p13.2   | -0.12898 | 0.01163  | 0.029908 |
| CPT1C    | 19q13.33 | -0.12895 | 0.011651 | 0.029958 |
| LRRTM2   | 5q31.2   | -0.12894 | 0.011659 | 0.029974 |
| IBTK     | 6q14.1   | 0.128928 | 0.011664 | 0.029983 |
| KLRC2    | 12p13.2  | -0.1289  | 0.011685 | 0.030033 |
| EMC8     | 16q24.1  | 0.128879 | 0.011696 | 0.030055 |
| HOMER1   | 5q14.1   | 0.128878 | 0.011697 | 0.030055 |
| OR56B1   | 11p15.4  | -0.12887 | 0.011705 | 0.030073 |
| VHL      | 3p25.3   | 0.128837 | 0.011723 | 0.030116 |
| FAM110A  | 20p13    | 0.128818 | 0.011736 | 0.030145 |
| MAST4    | 5q12.3   | -0.12881 | 0.011741 | 0.030154 |
| AHCYL2   | 7q32.1   | 0.128804 | 0.011745 | 0.03016  |
| FAM66C   | 12p13.31 | -0.1288  | 0.011748 | 0.030164 |
| RPP38-DT | 10p13    | 0.128782 | 0.01176  | 0.030189 |
| OR2A9P   | 7q35     | -0.12877 | 0.011765 | 0.030197 |
| USP33    | 1p31.1   | -0.12877 | 0.011766 | 0.030197 |
| PLAG1    | 8q12.1   | -0.12877 | 0.011771 | 0.030206 |
| PELO     | 5q11.2   | -0.12876 | 0.011772 | 0.030206 |
| TMEM237  | 2q33.1   | -0.12875 | 0.011782 | 0.030228 |
| PGAP3    | 17q12    | -0.12874 | 0.01179  | 0.030245 |
| G3BP2    | 4q21.1   | -0.12871 | 0.011806 | 0.030281 |
| JMJD8    | 16p13.3  | 0.12868  | 0.011827 | 0.030332 |
| TMCO3    | 13q34    | -0.12868 | 0.01183  | 0.030335 |
| ALOX15B  | 17p13.1  | -0.12867 | 0.011836 | 0.030348 |
| GIPC3    | 19p13.3  | -0.12865 | 0.011847 | 0.03037  |
| DEGS2    | 14q32.2  | 0.128644 | 0.011851 | 0.030378 |
| TKTL1    | Xq28     | -0.12864 | 0.011855 | 0.030384 |
| GCSH     | 16q23.2  | 0.128635 | 0.011857 | 0.030384 |
| KMO      | 1q43     | -0.12863 | 0.011861 | 0.030392 |
| KDELR3   | 22q13.1  | -0.1286  | 0.011883 | 0.030444 |
| THEMIS2  | 1p35.3   | -0.12859 | 0.011887 | 0.03045  |
| MIP      | 12q13.3  | -0.12858 | 0.011893 | 0.030462 |
| SSTR4    | 20p11.21 | -0.12856 | 0.011906 | 0.03049  |
| HSPD1    | 2q33.1   | 0.128551 | 0.011913 | 0.030504 |
| KIF2A    | 5q12.1   | 0.12855  | 0.011914 | 0.030504 |
| PGAP1    | 2q33.1   | 0.128545 | 0.011917 | 0.030507 |
| ZHX1     | 8q24.13  | -0.12853 | 0.011928 | 0.030532 |
| TMEM220  | 17p13.1  | -0.12852 | 0.011931 | 0.030537 |
| WT1-AS   | 11p13    | -0.12851 | 0.011937 | 0.030548 |
| NELL1    | 11p15.1  | -0.1285  | 0.011945 | 0.030564 |

|            |                     |          |          |          |
|------------|---------------------|----------|----------|----------|
| SLC25A51P4 | 11p15.1             | 0.128413 | 0.012005 | 0.030714 |
| ELP5       | 17p13.1             | -0.1284  | 0.012017 | 0.030739 |
| FBXO15     | 18q22.3             | -0.12837 | 0.012033 | 0.030778 |
| TRIL       | 7p14.3              | -0.12836 | 0.012042 | 0.030795 |
| TRIM74     | 7q11.23             | 0.128349 | 0.012048 | 0.030807 |
| PDCL2      | 4q12                | 0.128331 | 0.01206  | 0.030834 |
| MSI1       | 12q24.31            | -0.12832 | 0.012068 | 0.030848 |
| TAF13      | 1p13.3              | -0.12832 | 0.012068 | 0.030848 |
| PRRX2      | 9q34.11             | -0.12826 | 0.012109 | 0.030948 |
| ATP6V0D1   | 16q22.1             | -0.12822 | 0.012132 | 0.031003 |
| POLR2E     | 19p13.3             | 0.128192 | 0.012154 | 0.031056 |
| CD244      | 1q23.3              | -0.12818 | 0.012162 | 0.031072 |
| SIGIRR     | 11p15.5             | 0.128176 | 0.012165 | 0.031075 |
| RGS14      | 5q35.3              | 0.12817  | 0.012169 | 0.031081 |
| ARX        | Xp21.3              | 0.128138 | 0.012191 | 0.031134 |
| TGM5       | 15q15.2             | -0.12812 | 0.012202 | 0.031157 |
| SRRM4      | 12q24.23            | -0.12811 | 0.012209 | 0.031172 |
| CCL5       | 17q12               | -0.12811 | 0.012212 | 0.031175 |
| ZNF492     | 19p12               | -0.1281  | 0.012214 | 0.031175 |
| PHETA1     | 12q24.12            | 0.12809  | 0.012224 | 0.031197 |
| SPRY3      | Xq28 and Yq12       | 0.12807  | 0.012237 | 0.031228 |
| KMT2E-AS1  | 7q22.3              | 0.128064 | 0.012241 | 0.031234 |
| DNAH17     | 17q25.3             | 0.128061 | 0.012244 | 0.031235 |
| CYP27B1    | 12q14.1             | 0.128059 | 0.012245 | 0.031235 |
| MATR3      | 5q31.2              | -0.12805 | 0.012249 | 0.031242 |
| SDC1       | 2p24.1              | -0.12804 | 0.01226  | 0.031265 |
| C9ORF170   | 9q21.33             | -0.12803 | 0.012263 | 0.031266 |
| SYN3       | 22q12.3             | -0.12803 | 0.012263 | 0.031266 |
| ALKAL2     | 2p25.3              | -0.12799 | 0.012292 | 0.031336 |
| TNNI1      | 1q32.1              | 0.127962 | 0.012311 | 0.031377 |
| TBC1D22A   | 22q13.31            | -0.12796 | 0.012311 | 0.031377 |
| ITGA5      | 12q13.13            | -0.12795 | 0.012318 | 0.03139  |
| SLC9A3R2   | 16p13.3             | -0.12794 | 0.012324 | 0.0314   |
| SLC38A9    | 5q11.2              | -0.12794 | 0.012328 | 0.031408 |
| ZNF224     | 19q13.31            | 0.127904 | 0.012351 | 0.031461 |
| CCR5       | 3p21.31             | -0.12789 | 0.01236  | 0.031481 |
| DIABLO     | 12q24.31            | -0.12788 | 0.01237  | 0.031503 |
| NGRN       | 15q26.1             | -0.12787 | 0.012375 | 0.03151  |
| CLIC3      | 9q34.3              | -0.12786 | 0.012383 | 0.031528 |
| FAM168A    | 11q13.4             | -0.12782 | 0.012406 | 0.031579 |
| CDRT1      | 17p12               | 0.127824 | 0.012406 | 0.031579 |
| PI15       | 8q21.13             | -0.12782 | 0.01241  | 0.031585 |
| DHX33      | 17p13.2             | 0.127792 | 0.012428 | 0.031627 |
| PIGF       | 2p21                | -0.12778 | 0.012437 | 0.031639 |
| DIDO1      | 20q13.33            | 0.127779 | 0.012437 | 0.031639 |
| GSPT2      | Xp11.22             | -0.12778 | 0.012438 | 0.031639 |
| ABO        | 9q34.2              | 0.127776 | 0.012439 | 0.031639 |
| SLC6A15    | 12q21.31            | -0.12777 | 0.012446 | 0.031651 |
| DESI1      | 22q13.2             | 0.127764 | 0.012447 | 0.031651 |
| LRMP       | 12p12.1             | -0.12776 | 0.01245  | 0.031653 |
| FANCL      | 2p16.1              | 0.127758 | 0.012452 | 0.031655 |
| KIF26B     | 1q44                | -0.12774 | 0.012464 | 0.03168  |
| RNPC3      | 1p21.1              | 0.127739 | 0.012465 | 0.03168  |
| COL21A1    | 6p12.1 6p12.3-p11.2 | -0.12771 | 0.012485 | 0.031726 |
| SSPO       | 7q36.1              | 0.127702 | 0.012491 | 0.031737 |
| TRAPPC11   | 4q35.1              | -0.12768 | 0.012506 | 0.031771 |
| HPRT1      | Xq26.2-q26.3        | 0.127667 | 0.012515 | 0.031791 |
| MPV17L2    | 19p13.11            | 0.127611 | 0.012554 | 0.031886 |

|           |                |          |          |          |
|-----------|----------------|----------|----------|----------|
| PABPC1L2B | Xq13.2         | -0.12759 | 0.012568 | 0.031917 |
| FKBP1B    | 2p23.3         | -0.12759 | 0.01257  | 0.031918 |
| SVIP      | 11p14.3        | -0.12758 | 0.012575 | 0.031924 |
| KRTAP5-7  | 11q13.4        | 0.12758  | 0.012576 | 0.031924 |
| MYO7B     | 2q14.3         | 0.127578 | 0.012577 | 0.031924 |
| PHTF2     | 7q11.23-q21.11 | -0.12752 | 0.012619 | 0.032027 |
| RILP      | 17p13.3        | -0.12751 | 0.012627 | 0.032043 |
| MRPS18A   | 6p21.1         | 0.127501 | 0.012631 | 0.03205  |
| BRK1      | 3p25.3         | -0.12748 | 0.012643 | 0.032075 |
| TTC41P    | 12q23.3        | 0.127477 | 0.012648 | 0.032081 |
| C1QTNF6   | 22q12.3        | -0.12748 | 0.012648 | 0.032081 |
| GZMH      | 14q12          | -0.12746 | 0.01266  | 0.032107 |
| DYNLRB1   | 20q11.22       | -0.12744 | 0.012676 | 0.032143 |
| BCLAF1    | 6q23.3         | 0.127384 | 0.012713 | 0.032233 |
| PDE8A     | 15q25.3        | 0.127374 | 0.01272  | 0.032247 |
| GTF3C5    | 9q34.13        | 0.127353 | 0.012735 | 0.032281 |
| ANAPC16   | 10q22.1        | -0.12734 | 0.012745 | 0.032301 |
| SLC39A7   | 6p21.32        | 0.127321 | 0.012758 | 0.03233  |
| SCN2A     | 2q24.3         | -0.1273  | 0.012769 | 0.032355 |
| CAMSAP2   | 1q32.1         | -0.12729 | 0.012781 | 0.032381 |
| ZNF385D   | 3p24.3         | -0.12728 | 0.012788 | 0.032394 |
| AP2S1     | 19q13.32       | 0.127258 | 0.012803 | 0.032427 |
| CECR7     | 22q11.1        | -0.12724 | 0.012817 | 0.032459 |
| TNS2      | 12q13.13       | -0.12719 | 0.01285  | 0.03254  |
| KLHL14    | 18q12.1        | -0.12714 | 0.012886 | 0.032624 |
| OIP5-AS1  | 15q15.1        | 0.127138 | 0.012888 | 0.032628 |
| POU3F4    | Xq21.1         | -0.12711 | 0.012906 | 0.032669 |
| RBMXL1    | 1p22.2         | -0.1271  | 0.012913 | 0.032681 |
| SLC35E2A  | 1p36.33        | 0.127085 | 0.012926 | 0.03271  |
| GRPEL1    | 4p16.1         | 0.127058 | 0.012946 | 0.032754 |
| SPN       | 16p11.2        | -0.12705 | 0.012948 | 0.032754 |
| OSCAR     | 19q13.42       | -0.12705 | 0.012948 | 0.032754 |
| SH2D3C    | 9q34.11        | -0.12705 | 0.012953 | 0.032761 |
| TMEM132E  | 17q12          | -0.12704 | 0.012955 | 0.032761 |
| ACSL6     | 5q31.1         | -0.12704 | 0.012957 | 0.032761 |
| CTAGE6    | 7q35           | 0.127041 | 0.012958 | 0.032761 |
| ZNF414    | 19p13.2        | 0.127039 | 0.012959 | 0.032761 |
| UNC13C    | 15q21.3        | -0.12703 | 0.012965 | 0.032771 |
| TP53I11   | 11p11.2        | 0.127019 | 0.012973 | 0.032788 |
| ATP11A    | 13q34          | 0.126977 | 0.013004 | 0.032861 |
| POLR1E    | 9p13.2         | 0.12692  | 0.013044 | 0.03296  |
| RYR1      | 19q13.2        | -0.12691 | 0.01305  | 0.032969 |
| LINC01550 | 14q32.2        | -0.12689 | 0.013063 | 0.032998 |
| TUBG2     | 17q21.2        | -0.12689 | 0.013068 | 0.033008 |
| MAP2K2    | 19p13.3        | 0.126875 | 0.013077 | 0.033026 |
| NPHP1     | 2q13           | -0.12687 | 0.01308  | 0.033029 |
| WDR77     | 1p13.2         | 0.126869 | 0.013082 | 0.033029 |
| SRSF4     | 1p35.3         | 0.126862 | 0.013087 | 0.033038 |
| LOXL2     | 8p21.3         | -0.12686 | 0.013091 | 0.033044 |
| NDUFA10   | 2q37.3         | 0.126842 | 0.013101 | 0.033065 |
| OGA       | 10q24.32       | 0.126839 | 0.013104 | 0.033068 |
| HSPB1     | 7q11.23        | -0.12683 | 0.013106 | 0.03307  |
| CEBPE     | 14q11.2        | -0.12682 | 0.013115 | 0.033088 |
| PRICKLE3  | Xp11.23        | 0.126821 | 0.013116 | 0.033088 |
| TMEM253   | 14q11.2        | 0.126783 | 0.013144 | 0.033152 |
| S100A11   | 1q21.3         | 0.126761 | 0.01316  | 0.033185 |
| MAP7D2    | Xp22.12        | -0.12676 | 0.01316  | 0.033185 |
| SDK2      | 17q25.1        | -0.12676 | 0.013162 | 0.033187 |



|           |              |          |          |          |
|-----------|--------------|----------|----------|----------|
| TSTA3     | 8q24.3       | 0.126694 | 0.013209 | 0.033298 |
| VDAC2     | 10q22.2      | 0.126692 | 0.01321  | 0.033298 |
| NR2F2     | 15q26.2      | -0.12669 | 0.013214 | 0.033304 |
| PDE6A     | 5q32         | -0.12668 | 0.013215 | 0.033304 |
| MYBPHL    | 1p13.3       | -0.12664 | 0.013245 | 0.033374 |
| CSNK1D    | 17q25.3      | -0.12663 | 0.013258 | 0.0334   |
| AGR2      | 7p21.1       | 0.126626 | 0.013259 | 0.0334   |
| AGPS      | 2q31.2       | -0.12659 | 0.013287 | 0.033467 |
| RAB8A     | 19p13.11     | 0.126585 | 0.013289 | 0.033467 |
| RAB38     | 11q14.2      | -0.12658 | 0.013293 | 0.033473 |
| CTIF      | 18q21.1      | -0.12653 | 0.013328 | 0.033557 |
| OPLAH     | 8q24.3       | 0.126529 | 0.01333  | 0.033558 |
| LOC729609 | Xp22.12      | 0.126515 | 0.01334  | 0.033578 |
| FOXD3     | 1p31.3       | -0.12651 | 0.013341 | 0.033578 |
| FIG4      | 6q21         | -0.12648 | 0.013364 | 0.033633 |
| CDH26     | 20q13.33     | -0.12647 | 0.013375 | 0.033654 |
| CEP290    | 12q21.32     | 0.126464 | 0.013378 | 0.033658 |
| PDX1      | 13q12.2      | 0.126444 | 0.013393 | 0.033691 |
| CD40LG    | Xq26.3       | -0.12643 | 0.013406 | 0.03372  |
| MORN4     | 10q24.2      | -0.12642 | 0.013412 | 0.033732 |
| HOXD12    | 2q31.1       | -0.12641 | 0.013415 | 0.033735 |
| STC1      | 8p21.2       | -0.12636 | 0.013457 | 0.033836 |
| NUDT3     | 6p21.31      | 0.126344 | 0.013466 | 0.033854 |
| PHF10     | 6q27         | 0.126342 | 0.013468 | 0.033854 |
| KDM4A     | 1p34.2-p34.1 | -0.12633 | 0.013474 | 0.033867 |
| GRIA1     | 5q33.2       | -0.12632 | 0.013482 | 0.033881 |
| LILRB1    | 19q13.42     | -0.12631 | 0.013495 | 0.03391  |
| NEK10     | 3p24.1       | -0.12629 | 0.013507 | 0.033937 |
| PREX1     | 20q13.13     | -0.12629 | 0.013509 | 0.033938 |
| TESK1     | 9p13.3       | 0.126284 | 0.013511 | 0.033938 |
| ZNF765    | 19q13.42     | 0.126281 | 0.013513 | 0.03394  |
| TMEM132A  | 11q12.2      | -0.12627 | 0.013522 | 0.033956 |
| POLR2C    | 16q21        | -0.12626 | 0.013532 | 0.033976 |
| ACSM2A    | 16p12.3      | -0.12625 | 0.013533 | 0.033976 |
| SSTR5-AS1 | 16p13.3      | 0.126237 | 0.013546 | 0.034004 |
| SEMG1     | 20q13.12     | 0.126233 | 0.013549 | 0.034008 |
| TMEM115   | 3p21.31      | -0.12623 | 0.013553 | 0.034014 |
| A1BG-AS1  | 19q13.43     | -0.12618 | 0.013588 | 0.034093 |
| LYPD2     | 8q24.3       | -0.12618 | 0.013588 | 0.034093 |
| SUSD3     | 9q22.31      | -0.12618 | 0.013591 | 0.034095 |
| MYRF-AS1  | 11q12.2      | 0.126114 | 0.013638 | 0.034209 |
| LTV1      | 6q24.2       | 0.126101 | 0.013648 | 0.03423  |
| SNORD22   | 11q12.3      | 0.126084 | 0.013661 | 0.034254 |
| SOCS2     | 12q22        | -0.12608 | 0.013661 | 0.034254 |
| COG1      | 17q25.1      | -0.12604 | 0.013693 | 0.034331 |
| HIST3H3   | 1q42.13      | 0.126011 | 0.013716 | 0.034383 |
| FGF17     | 8p21.3       | 0.125985 | 0.013735 | 0.034425 |
| RWDD1     | 6q22.1       | -0.12598 | 0.013736 | 0.034425 |
| CD99L2    | Xq28         | -0.12596 | 0.013753 | 0.034464 |
| FGB       | 4q31.3       | -0.12592 | 0.013782 | 0.034532 |
| C10ORF90  | 10q26.2      | -0.12591 | 0.013792 | 0.034553 |
| TBC1D8B   | Xq22.3       | -0.1259  | 0.013799 | 0.034566 |
| SNORA5C   | 7p13         | 0.125897 | 0.013802 | 0.03457  |
| C10ORF95  | 10q24.32     | 0.125884 | 0.013812 | 0.03459  |
| KCNJ10    | 1q23.2       | -0.12582 | 0.013864 | 0.034716 |
| SCARNA16  | 17q25.2      | 0.125812 | 0.013867 | 0.034718 |
| COPS2     | 15q21.1      | -0.12579 | 0.013884 | 0.034758 |
| MOK       | 14q32.31     | 0.12577  | 0.013899 | 0.034786 |

|           |              |          |          |          |
|-----------|--------------|----------|----------|----------|
| CYCS      | 7p15.3       | 0.125769 | 0.013899 | 0.034786 |
| CBWD2     | 2q14.1       | 0.12575  | 0.013914 | 0.034819 |
| SNORA41   | 2q33.3       | 0.125742 | 0.01392  | 0.03483  |
| CDH15     | 16q24.3      | -0.12573 | 0.013929 | 0.034847 |
| CCL11     | 17q12        | -0.12573 | 0.013933 | 0.034853 |
| HDAC1     | 1p35.2-p35.1 | 0.125708 | 0.013946 | 0.034883 |
| TREM1     | 6p21.1       | -0.1257  | 0.013949 | 0.034886 |
| RET       | 10q11.21     | -0.12563 | 0.014009 | 0.03503  |
| FAM174B   | 15q26.1      | -0.12561 | 0.01402  | 0.035053 |
| TMEM42    | 3p21.31      | -0.12559 | 0.01404  | 0.0351   |
| TAF1      | 3p14.1       | -0.12556 | 0.014058 | 0.035139 |
| STEAP4    | 7q21.12      | -0.12555 | 0.014067 | 0.035158 |
| RTN4R     | 22q11.21     | 0.125542 | 0.014074 | 0.035171 |
| SLC15A4   | 12q24.33     | -0.12549 | 0.01411  | 0.035257 |
| CTRC      | 1p36.21      | 0.125484 | 0.014118 | 0.035266 |
| COIL      | 17q22        | -0.12548 | 0.014119 | 0.035266 |
| SLC49A3   | 4p16.3       | -0.12548 | 0.014119 | 0.035266 |
| PRINS     | 10p12.1      | 0.125458 | 0.014139 | 0.035311 |
| PAM16     | 16p13.3      | 0.125424 | 0.014165 | 0.035373 |
| TPTEP1    | 22q11.1      | -0.12538 | 0.014202 | 0.035461 |
| COL18A1   | 21q22.3      | -0.12536 | 0.014215 | 0.035488 |
| LINC01300 | 8q24.3       | 0.125357 | 0.014217 | 0.035488 |
| TFB2M     | 1q44         | 0.125346 | 0.014226 | 0.035505 |
| ITGA1     | 5q11.2       | -0.1253  | 0.014261 | 0.035589 |
| MYO6      | 6q14.1       | 0.125289 | 0.01427  | 0.035608 |
| DPCD      | 10q24.32     | 0.125277 | 0.014279 | 0.035627 |
| ZNF428    | 19q13.31     | -0.12523 | 0.014315 | 0.035711 |
| IGSF1     | Xq26.1       | -0.12522 | 0.014328 | 0.035738 |
| CUZD1     | 10q26.13     | 0.125212 | 0.01433  | 0.03574  |
| LCOR      | 10q24.1      | 0.125206 | 0.014335 | 0.035748 |
| PMPCB     | 7q22.1       | -0.1252  | 0.014343 | 0.035762 |
| CHD5      | 1p36.31      | 0.125166 | 0.014367 | 0.035818 |
| SYT17     | 16p12.3      | -0.12516 | 0.014372 | 0.035823 |
| TMED2     | 12q24.31     | -0.12516 | 0.014373 | 0.035823 |
| TESK2     | 1p34.1       | -0.12514 | 0.01439  | 0.035862 |
| GCNT7     | 20q13.31     | 0.125125 | 0.014399 | 0.03588  |
| SLC7A14   | 3q26.2       | -0.12512 | 0.014403 | 0.035885 |
| TRHDE-AS1 | 12q21.1      | -0.12508 | 0.014437 | 0.035966 |
| TAGLN3    | 3q13.2       | -0.12505 | 0.014458 | 0.036013 |
| CARD6     | 5p13.1       | -0.12502 | 0.014481 | 0.036066 |
| SGPP1     | 14q23.2      | -0.12502 | 0.014483 | 0.036068 |
| SLC35D2   | 9q22.32      | -0.125   | 0.014499 | 0.036103 |
| DGCR11    | 22q11.21     | 0.124992 | 0.014504 | 0.036109 |
| NCBP3     | 17p13.2      | 0.124984 | 0.01451  | 0.036122 |
| RFPL3S    | 22q12.3      | 0.124977 | 0.014516 | 0.03613  |
| SH3PXD2B  | 5q35.1       | -0.12498 | 0.014517 | 0.03613  |
| G6PD      | Xq28         | 0.124959 | 0.01453  | 0.036155 |
| UTP23     | 8q24.11      | -0.12496 | 0.014531 | 0.036155 |
| BATF3     | 1q32.3       | -0.12486 | 0.014606 | 0.036338 |
| CXCR6     | 3p21.31      | -0.12486 | 0.01461  | 0.036342 |
| SPZ1      | 5q14.1       | 0.124829 | 0.014634 | 0.036394 |
| CNGA3     | 2q11.2       | -0.12483 | 0.014634 | 0.036394 |
| MRPL24    | 1q23.1       | 0.124824 | 0.014638 | 0.036399 |
| SLC39A5   | 12q13.3      | -0.12482 | 0.014645 | 0.03641  |
| MUSTN1    | 3p21.1       | -0.1248  | 0.014655 | 0.036431 |
| LOC400940 | 2p25.2       | -0.1248  | 0.014661 | 0.036441 |
| APBA2     | 15q13.1      | -0.12477 | 0.014679 | 0.036482 |
| STOML2    | 9p13.3       | 0.124766 | 0.014684 | 0.036486 |

|           |                |          |          |          |
|-----------|----------------|----------|----------|----------|
| EEF1G     | 11q12.3        | -0.12477 | 0.014684 | 0.036486 |
| OR2D2     | 11p15.4        | 0.124744 | 0.014702 | 0.036524 |
| TTC16     | 9q34.11        | 0.124742 | 0.014703 | 0.036524 |
| CRP       | 1q23.2         | -0.12474 | 0.014705 | 0.036524 |
| TRAPPC1   | 17p13.1        | -0.12473 | 0.014715 | 0.036545 |
| PPP4C     | 16p11.2        | 0.124692 | 0.014744 | 0.036611 |
| COL12A1   | 6q13-q14.1     | -0.12469 | 0.014745 | 0.036611 |
| CCDC153   | 11q23.3        | -0.12467 | 0.014762 | 0.036649 |
| LGMMN     | 14q32.12       | -0.12466 | 0.014768 | 0.036657 |
| C6ORF223  | 6p21.1         | 0.124659 | 0.01477  | 0.036659 |
| NHLRC2    | 10q25.3        | 0.124653 | 0.014775 | 0.036667 |
| RNF167    | 17p13.2        | -0.12465 | 0.014779 | 0.036669 |
| ZNF331    | 19q13.42       | -0.12465 | 0.01478  | 0.036669 |
| ACOT1     | 14q24.3        | -0.12464 | 0.014782 | 0.03667  |
| PRR5L     | 11p13-p12      | 0.12464  | 0.014785 | 0.036674 |
| PPIL4     | 6q25.1         | -0.12458 | 0.014833 | 0.036787 |
| GCSAM     | 3q13.2         | 0.124577 | 0.014836 | 0.036791 |
| TCEA3     | 1p36.12        | 0.124568 | 0.014844 | 0.036805 |
| SNORA13   | 5q22.1         | 0.124529 | 0.014875 | 0.036875 |
| ZNF768    | 16p11.2        | 0.124528 | 0.014875 | 0.036875 |
| DPF1      | 19q13.2        | 0.124526 | 0.014878 | 0.036876 |
| EXOC3-AS1 | 5p15.33        | -0.12451 | 0.01489  | 0.036896 |
| TTC27     | 2p22.3         | -0.12451 | 0.01489  | 0.036896 |
| KATNBL1   | 15q14          | -0.12451 | 0.014891 | 0.036896 |
| MCRS1     | 12q13.12       | 0.124479 | 0.014916 | 0.036952 |
| IRAK4     | 12q12          | -0.12445 | 0.014936 | 0.036996 |
| FBXL22    | 15q22.31       | -0.12444 | 0.014944 | 0.037013 |
| SMAD1     | 4q31.21        | -0.12442 | 0.014966 | 0.037063 |
| SLC17A1   | 6p22.2         | -0.12439 | 0.014989 | 0.037115 |
| TRMT10B   | 9p13.2         | 0.124369 | 0.015005 | 0.03715  |
| RUNX3     | 1p36.11        | -0.12437 | 0.015007 | 0.03715  |
| OR6V1     | 7q34           | 0.124351 | 0.01502  | 0.037177 |
| DCTN5     | 16p12.2        | -0.12432 | 0.015042 | 0.037228 |
| GRHL1     | 2p25.1         | 0.124316 | 0.015049 | 0.03724  |
| GPR27     | 3p13           | -0.12427 | 0.015087 | 0.037329 |
| CEP170P1  | 4q26           | -0.12419 | 0.015149 | 0.037473 |
| CSF2RB    | 22q12.3        | -0.12419 | 0.015149 | 0.037473 |
| TRIM59    | 3q25.33        | 0.12419  | 0.015152 | 0.037475 |
| COG5      | 7q22.3         | -0.12419 | 0.015153 | 0.037475 |
| SLC17A3   | 6p22.2         | -0.12418 | 0.015164 | 0.037496 |
| COQ2      | 4q21.22-q21.23 | 0.12415  | 0.015185 | 0.037543 |
| SFMBT2    | 10p14          | -0.12415 | 0.015187 | 0.037545 |
| PAOX      | 10q26.3        | -0.12412 | 0.015208 | 0.037591 |
| IL32      | 16p13.3        | -0.12412 | 0.015213 | 0.037597 |
| TAF1      | Xq13.1         | 0.124114 | 0.015214 | 0.037597 |
| FAM170B   | 10q11.23       | -0.12411 | 0.015216 | 0.037597 |
| KIF7      | 15q26.1        | -0.12411 | 0.015217 | 0.037597 |
| HOXA3     | 7p15.2         | 0.124105 | 0.015222 | 0.037603 |
| TXNIP     | 1q21.1         | -0.1241  | 0.015228 | 0.037614 |
| GLP1R     | 6p21.2         | -0.12409 | 0.015232 | 0.037619 |
| PRCD      | 17q25.1        | -0.12409 | 0.015234 | 0.03762  |
| PIP4P1    | 14q11.2        | -0.12408 | 0.015246 | 0.037645 |
| KRT10     | 17q21.2        | -0.12406 | 0.015256 | 0.037665 |
| C18ORF25  | 18q21.1        | 0.124045 | 0.015272 | 0.037697 |
| NPHP3-AS1 | 3q22.1         | -0.12404 | 0.015273 | 0.037697 |
| LOC388955 | 2p15           | 0.124029 | 0.015285 | 0.037722 |
| FAM120B   | 6q27           | -0.12399 | 0.015316 | 0.037794 |
| SLC39A2   | 14q11.2        | -0.12398 | 0.015328 | 0.037812 |

|           |               |          |          |          |
|-----------|---------------|----------|----------|----------|
| IL27RA    | 19p13.12      | -0.12398 | 0.015328 | 0.037812 |
| PCSK5     | 9q21.13       | -0.12398 | 0.015329 | 0.037812 |
| GOLGA5    | 14q32.12      | -0.12395 | 0.015348 | 0.037854 |
| CASC10    | 10p12.31      | -0.12395 | 0.015353 | 0.037862 |
| SELENOH   | 11q12.1       | -0.12394 | 0.015363 | 0.037881 |
| SOX11     | 2p25.2        | -0.12393 | 0.015368 | 0.037889 |
| MRPL17    | 11p15.4       | 0.123901 | 0.015391 | 0.037942 |
| MTG1      | 10q26.3       | 0.123874 | 0.015414 | 0.037991 |
| TSACC     | 1q22          | 0.123873 | 0.015415 | 0.037991 |
| CLEC6A    | 12p13.31      | -0.12382 | 0.015462 | 0.038103 |
| SUPT20HL2 | Xp22.11       | -0.12376 | 0.015509 | 0.03821  |
| MED19     | 11q12.1       | -0.12376 | 0.01551  | 0.03821  |
| DPH2      | 1p34.1        | 0.123753 | 0.015516 | 0.038221 |
| NPR1      | 1q21.3        | -0.12372 | 0.015546 | 0.03829  |
| ING1      | 13q34         | 0.123711 | 0.015551 | 0.038298 |
| CYCSP52   | 1q23.1        | 0.123702 | 0.015558 | 0.038311 |
| DIPK2A    | 3q24          | -0.1237  | 0.015563 | 0.038319 |
| GPSM1     | 9q34.3        | -0.12368 | 0.01558  | 0.038355 |
| DLEU1     | 13q14.2-q14.3 | 0.123666 | 0.015589 | 0.038373 |
| WNT3A     | 1q42.13       | 0.123661 | 0.015593 | 0.038378 |
| FAM225A   | 9q32          | -0.12366 | 0.015595 | 0.038378 |
| ADSSL1    | 14q32.33      | -0.12366 | 0.015598 | 0.03838  |
| LRRC41    | 1p34.1-p33    | -0.12365 | 0.015602 | 0.038386 |
| EPB41L5   | 2q14.2        | -0.12358 | 0.015658 | 0.038519 |
| PMS2P1    | 7q22.1        | -0.12355 | 0.015688 | 0.038587 |
| KANK4     | 1p31.3        | -0.12354 | 0.015694 | 0.038597 |
| CSK       | 15q24.1       | 0.123512 | 0.01572  | 0.038656 |
| ZNF384    | 12p13.31      | 0.123506 | 0.015725 | 0.038664 |
| TMEM17    | 2p15          | -0.1235  | 0.015729 | 0.038669 |
| UGT3A1    | 5p13.2        | -0.12349 | 0.015735 | 0.03868  |
| METTL11B  | 1q24.2        | -0.12347 | 0.015754 | 0.038722 |
| LOC646999 | 7p14.1        | -0.12345 | 0.015769 | 0.038754 |
| PTPN3     | 9q31.3        | 0.12345  | 0.015772 | 0.038757 |
| ZNF528    | 19q13.41      | -0.12344 | 0.015778 | 0.038768 |
| CYTH4     | 22q13.1       | -0.12344 | 0.015783 | 0.038773 |
| HPGD      | 4q34.1        | -0.12344 | 0.015785 | 0.038773 |
| RNF111    | 15q22.1-q22.2 | -0.12338 | 0.015836 | 0.038895 |
| ZNF541    | 19q13.33      | -0.12336 | 0.015847 | 0.038918 |
| ZNF383    | 19q13.12      | -0.12334 | 0.015866 | 0.038958 |
| RNF24     | 20p13         | -0.12334 | 0.015869 | 0.038961 |
| L2HGDH    | 14q21.3       | 0.123331 | 0.015874 | 0.03897  |
| TRAF3IP3  | 1q32.2        | -0.12326 | 0.015934 | 0.039111 |
| ABCA11P   | 4p16.3        | -0.12326 | 0.015937 | 0.039113 |
| BAIAP2-DT | 17q25.3       | -0.12325 | 0.015942 | 0.03912  |
| SEMA3A    | 7q21.11       | -0.12323 | 0.01596  | 0.039161 |
| ATRX      | Xq21.1        | -0.12322 | 0.015966 | 0.039171 |
| PREPL     | 2p21          | -0.12322 | 0.015971 | 0.039178 |
| CCDC117   | 22q12.1       | -0.12321 | 0.015975 | 0.039183 |
| KPNA6     | 1p35.2        | 0.123179 | 0.016005 | 0.039252 |
| UBE3A     | 15q11.2       | -0.12317 | 0.016013 | 0.039267 |
| CD79A     | 19q13.2       | -0.12313 | 0.016044 | 0.039339 |
| FGG       | 4q32.1        | -0.12312 | 0.016055 | 0.039361 |
| TMEM88    | 17p13.1       | -0.12312 | 0.016059 | 0.039365 |
| DACH2     | Xq21.2        | -0.12311 | 0.016061 | 0.039366 |
| C5ORF47   | 5q35.2        | -0.12308 | 0.016088 | 0.039423 |
| ARG2      | 14q24.1       | -0.12308 | 0.016089 | 0.039423 |
| ASCC3     | 6q16.3        | 0.123067 | 0.016102 | 0.039448 |
| TBX18     | 6q14.3        | -0.12306 | 0.016104 | 0.039448 |

|           |               |          |          |          |
|-----------|---------------|----------|----------|----------|
| ZNF207    | 17q11.2       | 0.123064 | 0.016105 | 0.039448 |
| SMPDL3A   | 6q22.31       | -0.12305 | 0.016114 | 0.039467 |
| MTFP1     | 22q12.2       | 0.123015 | 0.016147 | 0.039542 |
| TSR1      | 17p13.3       | 0.123008 | 0.016153 | 0.039553 |
| RBCK1     | 20p13         | 0.122967 | 0.016189 | 0.039636 |
| NOC3L     | 10q23.33      | 0.122948 | 0.016206 | 0.039672 |
| COL6A1    | 21q22.3       | -0.12293 | 0.016221 | 0.039705 |
| SOD3      | 4p15.2        | -0.1229  | 0.01625  | 0.03977  |
| CD38      | 4p15.32       | -0.12288 | 0.016262 | 0.039795 |
| DNAL4     | 22q13.1       | -0.12286 | 0.016279 | 0.039832 |
| HAPLN4    | 19p13.11      | -0.12283 | 0.016312 | 0.039902 |
| PYY2      | 17q11.2       | 0.122827 | 0.016312 | 0.039902 |
| C16ORF96  | 16p13.3       | -0.12282 | 0.01632  | 0.039917 |
| KCNIP3    | 2q11.1        | -0.12281 | 0.016323 | 0.03992  |
| KRT83     | 12q13.13      | -0.12281 | 0.016325 | 0.03992  |
| NCF1C     | 7q11.23       | -0.1228  | 0.01634  | 0.039951 |
| CATSPERZ  | 11q13.1       | 0.122763 | 0.016368 | 0.040015 |
| PROX1     | 1q32.3        | -0.12275 | 0.016376 | 0.04003  |
| WNT9A     | 1q42.13       | -0.12273 | 0.0164   | 0.040082 |
| IFIT1     | 10q23.31      | -0.12271 | 0.016412 | 0.040107 |
| UHRF2     | 9p24.1        | 0.122709 | 0.016416 | 0.040112 |
| FAM131B   | 7q34          | 0.122674 | 0.016446 | 0.040182 |
| SCARNA9   | 11q21         | 0.122662 | 0.016457 | 0.040204 |
| RTN2      | 19q13.32      | -0.12265 | 0.016464 | 0.040214 |
| CAMKV     | 3p21.31       | -0.12265 | 0.016466 | 0.040215 |
| SERTAD3   | 19q13.2       | -0.12264 | 0.016474 | 0.040231 |
| ROMO1     | 20q11.22      | -0.12264 | 0.01648  | 0.040239 |
| POLK      | 5q13.3        | -0.12263 | 0.016485 | 0.040248 |
| EVPLL     | 17p11.2       | 0.122601 | 0.016512 | 0.040307 |
| C6ORF132  | 6p21.1        | 0.122592 | 0.016519 | 0.040321 |
| ENDOG     | 9q34.11       | 0.122584 | 0.016526 | 0.040333 |
| ARID1A    | 1p36.11       | 0.122571 | 0.016538 | 0.040356 |
| AFDN-DT   | 6q27          | 0.122565 | 0.016544 | 0.040366 |
| MYH13     | 17p13.1       | 0.122561 | 0.016547 | 0.040368 |
| LINC00839 | 10q11.21      | -0.12256 | 0.016551 | 0.040372 |
| FOXP4     | 6p21.1        | 0.122552 | 0.016555 | 0.040378 |
| EI24      | 11q24.2       | 0.122542 | 0.016564 | 0.040395 |
| NUBPL     | 14q12         | -0.12254 | 0.016567 | 0.040397 |
| COL6A3    | 2q37.3        | -0.12252 | 0.016581 | 0.040417 |
| LYPD1     | 2q21.2        | -0.12252 | 0.016583 | 0.040417 |
| CABLES2   | 20q13.33      | 0.122519 | 0.016584 | 0.040417 |
| DPH5      | 1p21.2        | -0.12252 | 0.016585 | 0.040417 |
| SHROOM4   | Xp11.22       | -0.12252 | 0.016585 | 0.040417 |
| SLC33A1   | 3q25.31       | -0.12252 | 0.016587 | 0.040418 |
| CTSW      | 11q13.1       | -0.12251 | 0.016596 | 0.040434 |
| FBXO28    | 1q42.11       | 0.122496 | 0.016604 | 0.04045  |
| MAGEA6    | Xq28          | -0.12248 | 0.016616 | 0.040473 |
| TRHR      | 8q23.1        | 0.122432 | 0.016662 | 0.040581 |
| COL5A1    | 9q34.3        | -0.12243 | 0.016664 | 0.040581 |
| PTPRS     | 19p13.3       | -0.1224  | 0.016691 | 0.040641 |
| GDA       | 9q21.13       | 0.122371 | 0.016717 | 0.040699 |
| PLEK2     | 14q23.3-q24.1 | 0.122332 | 0.016751 | 0.040778 |
| GSAP      | 7q11.23       | -0.12233 | 0.016755 | 0.040781 |
| TDRD5     | 1q25.2        | 0.122319 | 0.016763 | 0.040797 |
| SCARNA6   | 2q37.1        | 0.122316 | 0.016766 | 0.040798 |
| VWCE      | 11q12.2       | -0.12231 | 0.016768 | 0.040798 |
| P3H3      | 12p13.31      | -0.12231 | 0.016773 | 0.040807 |
| ZMYND8    | 20q13.12      | -0.1223  | 0.01678  | 0.040819 |

|          |          |          |          |          |
|----------|----------|----------|----------|----------|
| BMS1P20  | 22q11.22 | -0.12229 | 0.016793 | 0.040844 |
| KCNG3    | 2p21     | -0.12228 | 0.016797 | 0.04085  |
| HOMER2   | 15q25.2  | -0.12228 | 0.016801 | 0.040854 |
| ZNF846   | 19p13.2  | -0.12226 | 0.016813 | 0.040879 |
| ARHGAP42 | 11q22.1  | -0.12226 | 0.016818 | 0.040886 |
| FUCA1    | 1p36.11  | -0.12224 | 0.016839 | 0.040931 |
| CDH18    | 5p14.3   | -0.12222 | 0.016849 | 0.040942 |
| NR1D2    | 3p24.2   | -0.12222 | 0.016849 | 0.040942 |
| CYP8B1   | 3p22.1   | -0.12222 | 0.01685  | 0.040942 |
| GPC3     | Xq26.2   | -0.12218 | 0.016892 | 0.041041 |
| SMYD1    | 2p11.2   | -0.12212 | 0.016939 | 0.041149 |
| QPRT     | 16p11.2  | -0.12209 | 0.016973 | 0.041226 |
| ZRANB3   | 2q21.3   | 0.122041 | 0.017015 | 0.041324 |
| TRIR     | 19p13.13 | 0.122039 | 0.017017 | 0.041325 |
| CACNA2D4 | 12p13.33 | -0.12204 | 0.017019 | 0.041325 |
| NLRP8    | 19q13.43 | -0.12203 | 0.017024 | 0.041332 |
| RPS27L   | 15q22.2  | -0.12203 | 0.017029 | 0.041338 |
| NSMAF    | 8q12.1   | -0.122   | 0.017049 | 0.041382 |
| TOGARAM1 | 14q21.2  | -0.122   | 0.017054 | 0.041389 |
| CD320    | 19p13.2  | 0.12198  | 0.017071 | 0.041426 |
| CAMK2N2  | 3q27.1   | 0.121963 | 0.017087 | 0.041458 |
| PHLDA2   | 11p15.4  | 0.121955 | 0.017094 | 0.04147  |
| LRAT     | 4q32.1   | -0.12194 | 0.01711  | 0.041503 |
| CASTOR3  | 7q22.1   | -0.12194 | 0.017111 | 0.041503 |
| TSGA10   | 2q11.2   | -0.12191 | 0.017136 | 0.041556 |
| ZNF286B  | 17p11.2  | -0.1219  | 0.017141 | 0.041565 |
| SPATA22  | 17p13.2  | -0.1219  | 0.017147 | 0.041575 |
| SLC30A2  | 1p36.11  | -0.12189 | 0.017149 | 0.041575 |
| IL411    | 19q13.33 | -0.12186 | 0.017176 | 0.041636 |
| ETNK1    | 12p12.1  | -0.12185 | 0.017193 | 0.041671 |
| CMA1     | 14q12    | -0.12184 | 0.017204 | 0.041692 |
| CPAMD8   | 19p13.11 | -0.12183 | 0.017211 | 0.041703 |
| FDX1     | 11q22.3  | -0.12182 | 0.017217 | 0.041713 |
| SLC17A9  | 20q13.33 | 0.121809 | 0.017228 | 0.041734 |
| KCNQ1OT1 | 11p15.5  | 0.121794 | 0.017241 | 0.041763 |
| ADI1     | 2p25.3   | -0.12177 | 0.017267 | 0.041819 |
| UTP4     | 16q22.1  | 0.121733 | 0.017298 | 0.041889 |
| NNT      | 5p12     | 0.121704 | 0.017325 | 0.041949 |
| LYPLA1   | 8q11.23  | -0.12169 | 0.017335 | 0.041965 |
| TRAPPC4  | 11q23.3  | -0.12169 | 0.017335 | 0.041965 |
| NAPRT    | 8q24.3   | 0.121679 | 0.017348 | 0.041989 |
| RHOG     | 11p15.4  | -0.12168 | 0.017349 | 0.041989 |
| PAPLN    | 14q24.2  | -0.12167 | 0.017361 | 0.042006 |
| KRT5     | 12q13.13 | -0.12167 | 0.017361 | 0.042006 |
| PGAM1    | 10q24.1  | 0.121641 | 0.017383 | 0.042056 |
| TMEM196  | 7p21.1   | -0.12164 | 0.017386 | 0.042056 |
| VPS18    | 15q15.1  | -0.12163 | 0.017391 | 0.042064 |
| GPA33    | 1q24.1   | 0.121615 | 0.017407 | 0.042098 |
| FIGNL2   | 12q13.13 | -0.12161 | 0.017409 | 0.042098 |
| UQCRHL   | 1p36.21  | 0.121563 | 0.017456 | 0.042206 |
| SCUBE3   | 6p21.31  | -0.12156 | 0.017462 | 0.042216 |
| PRMT1    | 19q13.33 | 0.121522 | 0.017494 | 0.042288 |
| ASCL4    | 12q23.3  | -0.12151 | 0.017502 | 0.042303 |
| GNPNAT1  | 14q22.1  | 0.121493 | 0.017521 | 0.042343 |
| SCIN     | 7p21.3   | 0.121489 | 0.017525 | 0.042348 |
| CTSS     | 1q21.3   | -0.12147 | 0.017541 | 0.04238  |
| GALR3    | 22q13.1  | 0.121455 | 0.017556 | 0.042413 |
| EFCAB11  | 14q32.11 | 0.121437 | 0.017574 | 0.04245  |

|           |                |          |          |          |
|-----------|----------------|----------|----------|----------|
| HMHB1     | 5q31.3         | -0.12141 | 0.017602 | 0.042512 |
| SETD2     | 3p21.31        | 0.121396 | 0.017612 | 0.042532 |
| MRPS16    | 10q22.2        | 0.121384 | 0.017623 | 0.042554 |
| ALG10B    | 12q12          | -0.12138 | 0.017629 | 0.042562 |
| IMP4      | 2q21.1         | 0.121356 | 0.01765  | 0.042608 |
| SAMD5     | 6q24.3         | 0.121354 | 0.017652 | 0.042608 |
| IRF6      | 1q32.2         | 0.121338 | 0.017667 | 0.042639 |
| AKR7A3    | 1p36.13        | 0.121328 | 0.017677 | 0.042652 |
| PTENP1    | 9p13.3         | -0.12133 | 0.017677 | 0.042652 |
| LCN2      | 9q34.11        | 0.12132  | 0.017683 | 0.042663 |
| CLEC1B    | 12p13.31-p13.2 | -0.12131 | 0.017695 | 0.042685 |
| RAB9B     | Xq22.2         | -0.1213  | 0.0177   | 0.042694 |
| SLC4A1AP  | 2p23.3         | -0.12126 | 0.017736 | 0.042774 |
| VSX1      | 20p11.21       | -0.12125 | 0.017746 | 0.042792 |
| DYRK4     | 12p13.32       | -0.12125 | 0.017748 | 0.042792 |
| PRMT6     | 1p13.3         | -0.12125 | 0.017754 | 0.042802 |
| ZBTB7A    | 19p13.3        | 0.121216 | 0.017782 | 0.042865 |
| ARMC5     | 16p11.2        | 0.121202 | 0.017796 | 0.042892 |
| SINHCAF   | 12p11.21       | -0.12119 | 0.01781  | 0.042917 |
| OCIAD2    | 4p11           | -0.12118 | 0.017814 | 0.042917 |
| PILRA     | 7q22.1         | -0.12118 | 0.017814 | 0.042917 |
| RHBDD3    | 22q12.2        | 0.121182 | 0.017814 | 0.042917 |
| ZNF688    | 16p11.2        | -0.12118 | 0.017818 | 0.04292  |
| ANKRD20A3 | 9q21.11        | 0.121168 | 0.017827 | 0.042937 |
| CLK3      | 15q24.1        | 0.121156 | 0.017839 | 0.042961 |
| SDK1      | 7p22.2         | -0.12115 | 0.017846 | 0.042972 |
| C2ORF16   | 2p23.3         | -0.12113 | 0.017864 | 0.043012 |
| MLXIP     | 12q24.31       | 0.121117 | 0.017876 | 0.043034 |
| GRK3      | 22q12.1        | -0.12111 | 0.017883 | 0.043045 |
| MSL2      | 3q22.3         | 0.121045 | 0.017944 | 0.043189 |
| CCDC138   | 2q13           | 0.12103  | 0.017959 | 0.043217 |
| UBE2MP1   | 16p11.2        | 0.121011 | 0.017977 | 0.043257 |
| HM13      | 20q11.21       | -0.121   | 0.017991 | 0.043285 |
| DNALI1    | 1p34.3         | -0.12097 | 0.018019 | 0.043348 |
| EIF3L     | 22q13.1        | -0.12092 | 0.018067 | 0.043457 |
| ARHGAP35  | 19q13.32       | 0.120905 | 0.018079 | 0.04348  |
| VAT1L     | 16q23.1        | -0.1209  | 0.018081 | 0.04348  |
| PARD3B    | 2q33.3         | -0.12089 | 0.018095 | 0.043509 |
| C2        | 6p21.33        | -0.12087 | 0.018116 | 0.043555 |
| ADGRG4    | Xq26.3         | -0.12085 | 0.018129 | 0.04358  |
| CCL22     | 16q21          | -0.12084 | 0.018138 | 0.043592 |
| PITRM1    | 10p15.2        | 0.120841 | 0.01814  | 0.043592 |
| SFTA1P    | 10p14          | -0.12084 | 0.01814  | 0.043592 |
| ZBTB22    | 6p21.32        | -0.12083 | 0.018148 | 0.0436   |
| HEXIM2    | 17q21.31       | -0.12083 | 0.018148 | 0.0436   |
| C6ORF47   | 6p21.33        | 0.120822 | 0.018158 | 0.04362  |
| PRMT9     | 4q31.23        | -0.12081 | 0.018173 | 0.043649 |
| FYCO1     | 3p21.31        | -0.1208  | 0.018184 | 0.04367  |
| CNOT6L    | 4q21.1         | -0.12079 | 0.018192 | 0.043684 |
| MGRN1     | 16p13.3        | 0.120772 | 0.018207 | 0.043714 |
| ST18      | 8q11.23        | -0.12077 | 0.018209 | 0.043714 |
| MYLK3     | 16q11.2        | -0.12075 | 0.018227 | 0.043753 |
| ROBO2     | 3p12.3         | -0.12074 | 0.018237 | 0.043771 |
| H2AFV     | 7p13           | 0.120724 | 0.018253 | 0.043806 |
| SCNM1     | 1q21.3         | 0.120719 | 0.018259 | 0.043813 |
| OR2H2     | 6p22.1         | 0.120715 | 0.018262 | 0.043816 |
| ZNF571    | 19q13.12       | -0.1207  | 0.018281 | 0.043857 |
| REN       | 1q32.1         | -0.12062 | 0.018355 | 0.044029 |

|           |             |          |          |          |
|-----------|-------------|----------|----------|----------|
| B3GNT8    | 19q13.2     | -0.12061 | 0.018365 | 0.044048 |
| KLF12     | 13q22.1     | -0.1206  | 0.018371 | 0.044055 |
| COQ4      | 9q34.11     | 0.120595 | 0.018379 | 0.044071 |
| LINC00596 | 14q11.2     | 0.120592 | 0.018382 | 0.044071 |
| SOBP      | 6q21        | -0.12059 | 0.018384 | 0.044073 |
| SNORA56   | Xq28        | 0.120531 | 0.018441 | 0.044201 |
| ZDHHC14   | 6q25.3      | 0.12053  | 0.018442 | 0.044201 |
| NTMT1     | 9q34.11     | 0.120498 | 0.018474 | 0.044272 |
| OXSR1     | 3p22.2      | 0.120472 | 0.018499 | 0.044327 |
| TMEM160   | 19q13.32    | 0.120455 | 0.018516 | 0.044361 |
| PPEF2     | 4q21.1      | 0.120435 | 0.018536 | 0.044404 |
| VKORC1L1  | 7q11.21     | -0.12041 | 0.018562 | 0.044458 |
| ZNF749    | 19q13.43    | 0.120407 | 0.018563 | 0.044458 |
| NAT8L     | 4p16.3      | -0.1204  | 0.018566 | 0.044459 |
| EBNA1BP2  | 1p34.2      | 0.120353 | 0.018616 | 0.044575 |
| KDM4B     | 19p13.3     | 0.120319 | 0.01865  | 0.04465  |
| AKNA      | 9q32        | 0.120311 | 0.018658 | 0.04466  |
| RALGPS1   | 9q33.3      | 0.120309 | 0.01866  | 0.04466  |
| RHEBL1    | 12q13.12    | 0.120308 | 0.018661 | 0.04466  |
| RPL39     | Xq24        | -0.1203  | 0.018665 | 0.044666 |
| CHP1      | 15q15.1     | 0.120292 | 0.018676 | 0.044687 |
| FAM83B    | 6p12.1      | 0.120255 | 0.018713 | 0.044766 |
| AFDN      | 6q27        | 0.120254 | 0.018714 | 0.044766 |
| DDTL      | 22q11.23    | 0.12025  | 0.018718 | 0.04477  |
| POLR2H    | 3q27.1      | 0.120239 | 0.018729 | 0.044791 |
| TOR1AIP1  | 1q25.2      | -0.12018 | 0.018783 | 0.044916 |
| C16ORF86  | 16q22.1     | -0.12018 | 0.018792 | 0.044931 |
| CSKMT     | 11q12.3     | 0.120144 | 0.018824 | 0.045002 |
| TFRC      | 3q29        | 0.120125 | 0.018842 | 0.04504  |
| ALKBH3    | 11p11.2     | -0.12011 | 0.018853 | 0.045062 |
| POMGNT1   | 1p34.1      | -0.12009 | 0.018875 | 0.045109 |
| KRT17P5   | 17p11.2     | 0.12008  | 0.018887 | 0.045132 |
| PKD2L2    | 5q31.2      | 0.120055 | 0.018912 | 0.045187 |
| ADNP2     | 18q23       | 0.120047 | 0.01892  | 0.0452   |
| NDUFC2    | 11q14.1     | -0.12003 | 0.018935 | 0.045231 |
| PNPLA7    | 9q34.3      | 0.120021 | 0.018947 | 0.045252 |
| RUNDC3A   | 17q21.31    | -0.12002 | 0.01895  | 0.045254 |
| RAB6D     | 2q21.1      | -0.12002 | 0.018952 | 0.045254 |
| AADAT     | 4q33        | 0.12     | 0.018967 | 0.045285 |
| CD163     | 12p13.31    | -0.12    | 0.018972 | 0.045291 |
| ZNF773    | 19q13.43    | -0.11998 | 0.018992 | 0.045333 |
| CLU10S    | 12q22       | -0.11997 | 0.019001 | 0.04535  |
| LRRC40    | 1p31.1      | -0.1199  | 0.019063 | 0.045494 |
| ABI2      | 2q33.2      | -0.11989 | 0.019078 | 0.045521 |
| NOD2      | 16q12.1     | -0.11989 | 0.019079 | 0.045521 |
| SNX19     | 11q24.3-q25 | -0.11988 | 0.019085 | 0.04553  |
| NTN5      | 19q13.33    | 0.119876 | 0.019091 | 0.045535 |
| NFAM1     | 22q13.2     | -0.11988 | 0.019092 | 0.045535 |
| FGFR2     | 10q26.13    | -0.11986 | 0.019103 | 0.045556 |
| HEATR4    | 14q24.3     | 0.119858 | 0.01911  | 0.045568 |
| TBX6      | 16p11.2     | 0.119842 | 0.019126 | 0.0456   |
| HADHA     | 2p23.3      | -0.11983 | 0.01914  | 0.045626 |
| KIAA1841  | 2p15        | 0.119827 | 0.019142 | 0.045626 |
| HNRNPUL2  | 11q12.3     | 0.119789 | 0.01918  | 0.045712 |
| AFG3L2    | 18p11.21    | 0.11978  | 0.019189 | 0.045727 |
| TOB1      | 17q21.33    | -0.11977 | 0.019199 | 0.045742 |
| ADAMTS10  | 19p13.2     | -0.11977 | 0.019199 | 0.045742 |
| SLC26A6   | 3p21.31     | 0.119763 | 0.019206 | 0.045752 |



|            |          |          |          |          |
|------------|----------|----------|----------|----------|
| PHF7       | 3p21.1   | 0.119703 | 0.019266 | 0.045891 |
| PRMT7      | 16q22.1  | 0.119668 | 0.019302 | 0.045971 |
| ALPL       | 1p36.12  | -0.11965 | 0.019318 | 0.045997 |
| SERPINB1   | 6p25.2   | 0.119653 | 0.019318 | 0.045997 |
| C3ORF79    | 3q25.2   | 0.119624 | 0.019347 | 0.046061 |
| NMD3       | 3q26.1   | -0.11962 | 0.019351 | 0.046065 |
| EVX1       | 7p15.2   | 0.119568 | 0.019405 | 0.046187 |
| MAGEA12    | Xq28     | -0.11956 | 0.019412 | 0.046198 |
| POTEH      | 22q11.1  | -0.11956 | 0.019417 | 0.046201 |
| IL23R      | 1p31.3   | -0.11956 | 0.019418 | 0.046201 |
| FUBP1      | 1p31.1   | 0.119527 | 0.019447 | 0.046261 |
| BZW2       | 7p21.1   | 0.119526 | 0.019447 | 0.046261 |
| CD93       | 20p11.21 | -0.11949 | 0.019487 | 0.046351 |
| ESPNL      | 2q37.3   | -0.11948 | 0.019491 | 0.046353 |
| LYZL2      | 10p11.23 | 0.119466 | 0.019509 | 0.04639  |
| GPR179     | 17q12    | -0.11944 | 0.019536 | 0.04645  |
| ACTL7A     | 9q31.3   | 0.119422 | 0.019554 | 0.046488 |
| MED29      | 19q13.2  | -0.11942 | 0.019557 | 0.046489 |
| CTTNBP2    | 7q31.31  | -0.11936 | 0.019615 | 0.04662  |
| CHRN3      | 8p11.21  | -0.11935 | 0.019626 | 0.046642 |
| CCDC185    | 1q41     | -0.11933 | 0.019654 | 0.046702 |
| F11R       | 1q23.3   | 0.119321 | 0.019658 | 0.046707 |
| SCN1A      | 2q24.3   | -0.11931 | 0.019666 | 0.046721 |
| CNOT2      | 12q15    | -0.11929 | 0.01969  | 0.046773 |
| GJB1       | Xq13.1   | -0.11927 | 0.019712 | 0.046816 |
| ANKAR      | 2q32.2   | -0.11927 | 0.019713 | 0.046816 |
| TATDN2     | 3p25.3   | 0.119239 | 0.019744 | 0.046882 |
| ANKRD40    | 17q21.33 | -0.1192  | 0.019781 | 0.046965 |
| FASLG      | 1q24.3   | -0.11917 | 0.01981  | 0.04703  |
| RPAP1      | 15q15.1  | 0.119159 | 0.019826 | 0.047061 |
| BEND4      | 4p13     | -0.11915 | 0.019834 | 0.047074 |
| ABLIM1     | 10q25.3  | 0.119131 | 0.019856 | 0.04712  |
| UTP20      | 12q23.2  | 0.119113 | 0.019875 | 0.04716  |
| MTMR7      | 8p22     | -0.1191  | 0.019884 | 0.047176 |
| MOB3B      | 9p21.2   | 0.119102 | 0.019886 | 0.047176 |
| SEC24C     | 10q22.2  | 0.1191   | 0.019888 | 0.047176 |
| CHST9      | 18q11.2  | -0.11908 | 0.019912 | 0.047226 |
| TRPC6      | 11q22.1  | -0.11907 | 0.019921 | 0.047242 |
| MAD1L1     | 7p22.3   | 0.119066 | 0.019924 | 0.047243 |
| THSD1      | 13q14.3  | -0.11906 | 0.019932 | 0.047256 |
| HMG20B     | 19p13.3  | 0.119047 | 0.019943 | 0.047274 |
| GLYATL3    | 6p12.3   | -0.11905 | 0.019944 | 0.047274 |
| PPP3CA     | 4q24     | -0.11904 | 0.019947 | 0.047274 |
| AGPAT2     | 9q34.3   | 0.119024 | 0.019967 | 0.047318 |
| OR10P1     | 12q13.2  | 0.118995 | 0.019998 | 0.047386 |
| GAL3ST2    | 2q37.3   | 0.118979 | 0.020015 | 0.04742  |
| AMOTL2     | 3q22.2   | -0.11897 | 0.020022 | 0.047431 |
| IL18BP     | 11q13.4  | -0.11897 | 0.020029 | 0.047438 |
| VPS37D     | 7q11.23  | -0.11896 | 0.02003  | 0.047438 |
| TEKT1      | 17p13.1  | -0.11895 | 0.020043 | 0.047463 |
| NOL9       | 1p36.31  | 0.11893  | 0.020066 | 0.047513 |
| DGKE       | 17q22    | 0.11892  | 0.020077 | 0.047532 |
| GPR19      | 12p13.1  | 0.118909 | 0.020089 | 0.047555 |
| LBP        | 20q11.23 | -0.1189  | 0.020099 | 0.047575 |
| PCED1B-AS1 | 12q13.11 | -0.11887 | 0.020126 | 0.047633 |
| NEURL3     | 2q11.2   | -0.11882 | 0.020184 | 0.047759 |
| PRPF38B    | 1p13.3   | 0.118818 | 0.020184 | 0.047759 |
| ABHD14A    | 3p21.2   | -0.11881 | 0.020193 | 0.047775 |

|            |                 |          |          |          |
|------------|-----------------|----------|----------|----------|
| ZNF320     | 19q13.41        | 0.118796 | 0.020207 | 0.047802 |
| OXCT1      | 5p13.1          | 0.118793 | 0.020211 | 0.047806 |
| ORMDL2     | 12q13.2         | -0.11874 | 0.020264 | 0.047925 |
| SLC45A2    | 5p13.2          | -0.11874 | 0.020267 | 0.047926 |
| C3ORF22    | 3q21.3          | 0.118704 | 0.020306 | 0.048012 |
| HIST2H3D   | 1q21.2          | 0.118686 | 0.020325 | 0.048051 |
| AP1G1      | 16q22.2         | 0.118682 | 0.020328 | 0.048054 |
| PTGER4     | 5p13.1          | -0.11866 | 0.02035  | 0.048094 |
| SLC18B1    | 6q23.2          | 0.118662 | 0.02035  | 0.048094 |
| SNORA67    | 17p13.1         | 0.118653 | 0.02036  | 0.048111 |
| FAS        | 10q23.31        | -0.11863 | 0.020381 | 0.048155 |
| TTC39B     | 9p22.3          | 0.118628 | 0.020386 | 0.048158 |
| SLC22A9    | 11q12.3         | -0.11863 | 0.020387 | 0.048158 |
| BCAS4      | 20q13.13        | -0.1186  | 0.020415 | 0.048219 |
| DEPTOR     | 8q24.12         | -0.1186  | 0.02042  | 0.048224 |
| VLDLR-AS1  | 9p24.2          | -0.11859 | 0.020422 | 0.048224 |
| WDR83OS    | 19p13.13        | -0.11858 | 0.020435 | 0.04825  |
| UBE2E1     | 3p24.2          | -0.11854 | 0.020477 | 0.048343 |
| UTF1       | 10q26.3         | -0.11852 | 0.020506 | 0.048404 |
| PHACTR1    | 6p24.1          | -0.11847 | 0.020557 | 0.04852  |
| METTL5     | 2q31.1          | -0.11847 | 0.020559 | 0.04852  |
| KRTAP10-10 | 21q22.3         | 0.118462 | 0.020564 | 0.048525 |
| GPR161     | 1q24.2          | -0.11845 | 0.020574 | 0.048544 |
| EIF3H      | 8q23.3-q24.11   | -0.11844 | 0.020593 | 0.048582 |
| ACOT2      | 14q24.3         | -0.11842 | 0.020612 | 0.048623 |
| TIGIT      | 3q13.31         | -0.11837 | 0.020666 | 0.048743 |
| ATAD1      | 10q23.31        | -0.11836 | 0.020673 | 0.048753 |
| ZNRF2      | 7p14.3          | -0.11836 | 0.020676 | 0.048755 |
| RASSF9     | 12q21.31        | -0.11834 | 0.020691 | 0.048784 |
| ANGPT2     | 8p23.1          | -0.11834 | 0.020695 | 0.048789 |
| DAGLA      | 11q12.2         | 0.118335 | 0.020701 | 0.048796 |
| CHCHD1     | 10q22.2         | 0.118274 | 0.020767 | 0.048946 |
| MEST       | 7q32.2          | -0.11827 | 0.020775 | 0.04896  |
| SLC20A2    | 8p11.21         | -0.11826 | 0.020784 | 0.048975 |
| ELMOD1     | 11q22.3         | -0.11826 | 0.020787 | 0.048976 |
| NAA16      | 13q14.11        | 0.118229 | 0.020816 | 0.04904  |
| FBXW5      | 9q34.3          | 0.118183 | 0.020867 | 0.049153 |
| DEPDC4     | 12q23.1         | 0.118176 | 0.020874 | 0.049161 |
| CXCL2      | 4q13.3          | 0.118175 | 0.020875 | 0.049161 |
| TMX4       | 20p12.3         | -0.11814 | 0.020914 | 0.049248 |
| SCN5A      | 3p22.2          | -0.11812 | 0.02094  | 0.049297 |
| NPAS2      | 2q11.2          | 0.118115 | 0.02094  | 0.049297 |
| RCHY1      | 4q21.1          | -0.11811 | 0.020951 | 0.049316 |
| NAP1L5     | 4q22.1 4q21-q22 | -0.1181  | 0.020958 | 0.049326 |
| KRT18P55   | 17q11.2         | 0.118094 | 0.020963 | 0.049334 |
| THAP2      | 12q21.1         | -0.11809 | 0.020971 | 0.049343 |
| RIOK1      | 6p24.3          | 0.118085 | 0.020973 | 0.049343 |
| WSCD1      | 17p13.2         | -0.11808 | 0.020974 | 0.049343 |
| ARHGEF15   | 17p13.1         | -0.11803 | 0.02103  | 0.049467 |
| EMBP1      | 1p11.2          | -0.11801 | 0.021058 | 0.049528 |
| CMTM6      | 3p22.3          | -0.11799 | 0.021077 | 0.049567 |
| HNRNPA1    | 12q13.13        | 0.117966 | 0.021104 | 0.049624 |
| OMG        | 17q11.2         | 0.11796  | 0.02111  | 0.049632 |
| SERPINB6   | 6p25.2          | 0.117942 | 0.02113  | 0.049675 |
| KCNJ12     | 17p11.2         | -0.11794 | 0.021134 | 0.049676 |
| IRAK2      | 3p25.3          | -0.11793 | 0.021144 | 0.049695 |
| ZNF567     | 19q13.12        | -0.11792 | 0.021151 | 0.049706 |
| NPY        | 7p15.3          | -0.11785 | 0.021234 | 0.049893 |

|           |              |          |          |          |
|-----------|--------------|----------|----------|----------|
| MPO       | 17q22        | -0.11785 | 0.021236 | 0.049893 |
| AURKAIP1  | 1p36.33      | 0.117836 | 0.021247 | 0.049913 |
| PKDREJ    | 22q13.31     | 0.117818 | 0.021266 | 0.049953 |
| LONP2     | 16q12.1      | 0.117765 | 0.021325 | 0.050086 |
| STRC      | 15q15.3      | 0.117751 | 0.021341 | 0.050116 |
| PIGR      | 1q32.1       | 0.117735 | 0.021359 | 0.05015  |
| RSC1A1    | 1p36.21      | 0.117734 | 0.02136  | 0.05015  |
| ARRB2     | 17p13.2      | -0.11773 | 0.021369 | 0.05016  |
| MST1L     | 1p36.13      | 0.117726 | 0.021369 | 0.05016  |
| CYP4V2    | 4q35.1-q35.2 | -0.11772 | 0.021377 | 0.050165 |
| MRPS6     | 21q22.11     | -0.11772 | 0.021377 | 0.050165 |
| RSPO4     | 20p13        | -0.11771 | 0.021381 | 0.050165 |
| EPHA10    | 1p34.3       | 0.117715 | 0.021382 | 0.050165 |
| PPP2CB    | 8p12         | -0.11771 | 0.021387 | 0.050172 |
| SMIM21    | 18q23        | -0.11769 | 0.021409 | 0.050217 |
| BHMT      | 5q14.1       | -0.11767 | 0.021434 | 0.050266 |
| RSU1      | 10p13        | -0.11766 | 0.021437 | 0.050266 |
| TADA1     | 1q24.1       | 0.117665 | 0.021437 | 0.050266 |
| CTNNBIP1  | 1p36.22      | 0.117641 | 0.021464 | 0.050324 |
| HIST1H4B  | 6p22.2       | 0.117615 | 0.021493 | 0.050385 |
| AKR1C4    | 10p15.1      | -0.11761 | 0.021496 | 0.050386 |
| WDR35     | 2p24.1       | -0.11758 | 0.021535 | 0.050472 |
| GSTM2P1   | 6q21         | 0.117573 | 0.02154  | 0.050478 |
| KLK4      | 19q13.41     | -0.11756 | 0.021554 | 0.050505 |
| AVPR2     | Xq28         | -0.11752 | 0.021598 | 0.050601 |
| ZBED2     | 3q13.13      | -0.11751 | 0.021605 | 0.050611 |
| PI4K2B    | 4p15.2       | 0.117498 | 0.021624 | 0.050648 |
| CARD8     | 19q13.33     | -0.1175  | 0.021625 | 0.050648 |
| SPIRE2    | 16q24.3      | 0.117486 | 0.021637 | 0.05067  |
| FMNL1     | 17q21.31     | -0.11746 | 0.021661 | 0.05072  |
| RPS6KA6   | Xq21.1       | -0.11745 | 0.021677 | 0.050752 |
| ZNF777    | 7q36.1       | 0.117442 | 0.021687 | 0.050767 |
| LOC728554 | 5q35.3       | 0.11744  | 0.021689 | 0.050767 |
| RAB27A    | 15q21.3      | -0.11742 | 0.021712 | 0.050816 |
| THAP4     | 2q37.3       | 0.117388 | 0.021748 | 0.050891 |
| REG4      | 1p12         | 0.117385 | 0.021751 | 0.050891 |
| AGAP3     | 7q36.1       | 0.117384 | 0.021752 | 0.050891 |
| NCMAP     | 1p36.11      | -0.11737 | 0.021765 | 0.050915 |
| C1ORF56   | 1q21.3       | -0.11737 | 0.021768 | 0.050917 |
| TRAPPC2   | Xp22.2       | 0.117362 | 0.021777 | 0.050927 |
| EFNA3     | 1q21.3       | 0.117359 | 0.02178  | 0.050927 |
| RPS20     | 8q12.1       | -0.11736 | 0.02178  | 0.050927 |
| ARHGAP6   | Xp22.2       | -0.11736 | 0.021784 | 0.05093  |
| DLGAP1    | 18p11.31     | -0.11735 | 0.021791 | 0.05094  |
| ARID5A    | 2q11.2       | -0.11732 | 0.021819 | 0.051001 |
| QSER1     | 11p13        | 0.11731  | 0.021836 | 0.051034 |
| DVL3      | 3q27.1       | 0.117306 | 0.02184  | 0.051038 |
| MGAT5B    | 17q25.2      | -0.11728 | 0.021867 | 0.051094 |
| NADSYN1   | 11q13.4      | 0.11723  | 0.021926 | 0.051227 |
| C11ORF88  | 11q23.1      | -0.11722 | 0.021939 | 0.051251 |
| IER5      | 1q25.3       | 0.117215 | 0.021944 | 0.051253 |
| NIPAL3    | 1p36.11      | 0.117214 | 0.021945 | 0.051253 |
| ZBTB38    | 3q23         | -0.11721 | 0.021953 | 0.051265 |
| PRDX6     | 1q25.1       | 0.117189 | 0.021974 | 0.051308 |
| LOC730101 | 6p12.2       | 0.117155 | 0.022012 | 0.051392 |
| AOC1      | 7q36.1       | -0.11714 | 0.022034 | 0.051437 |
| DSC1      | 18q12.1      | -0.11712 | 0.022048 | 0.051463 |
| TNFAIP8   | 5q23.1       | -0.1171  | 0.022079 | 0.05153  |

|           |                |          |          |          |
|-----------|----------------|----------|----------|----------|
| BPIFB4    | 20q11.21       | -0.11709 | 0.022087 | 0.051541 |
| COQ8A     | 1q42.13        | 0.117088 | 0.022089 | 0.051541 |
| CDC20B    | 5q11.2         | -0.11708 | 0.022094 | 0.051548 |
| PDE4B     | 1p31.3         | -0.11703 | 0.022154 | 0.05168  |
| MSL1      | 17q21.1        | 0.117029 | 0.022156 | 0.05168  |
| SLC6A4    | 17q11.2        | -0.11702 | 0.02217  | 0.051706 |
| CFLAR     | 2q33.1         | -0.11698 | 0.022213 | 0.0518   |
| ZSCAN23   | 6p22.1         | -0.11697 | 0.022222 | 0.051814 |
| IL36A     | 2q14.1         | -0.11696 | 0.022231 | 0.051825 |
| MEIG1     | 10p13          | -0.11696 | 0.022231 | 0.051825 |
| MRGPRE    | 11p15.4        | -0.11696 | 0.022238 | 0.051835 |
| ZRANB2    | 1p31.1         | 0.116933 | 0.022267 | 0.051895 |
| LMBR1     | 7q36.3         | -0.11693 | 0.022273 | 0.051901 |
| FAM104A   | 17q25.1        | -0.11693 | 0.022275 | 0.051901 |
| FOLR3     | 11q13.4        | -0.11692 | 0.022283 | 0.051915 |
| ZNF280A   | 22q11.22       | -0.1169  | 0.022299 | 0.051946 |
| MSH4      | 1p31.1         | 0.116899 | 0.022305 | 0.051954 |
| GPR143    | Xp22.2         | -0.11688 | 0.022325 | 0.05199  |
| PPP1R14C  | 6q25.1         | -0.11688 | 0.022326 | 0.05199  |
| MS4A8     | 11q12.2        | 0.116822 | 0.022394 | 0.052144 |
| SLC9A1    | 1p36.11        | 0.11681  | 0.022408 | 0.05217  |
| TOMM6     | 6p21.1         | 0.116795 | 0.022426 | 0.052206 |
| PRR29     | 17q23.3        | -0.11679 | 0.022435 | 0.052219 |
| DPYSL5    | 2p23.3         | -0.11678 | 0.02244  | 0.052219 |
| GRIA2     | 4q32.1         | -0.11678 | 0.02244  | 0.052219 |
| NFXL1     | 4p12           | 0.116777 | 0.022447 | 0.052231 |
| KYAT3     | 1p22.2         | -0.11677 | 0.022454 | 0.05224  |
| FUT1      | 19q13.33       | 0.116759 | 0.022468 | 0.052266 |
| TENT2     | 5q14.1         | -0.11676 | 0.022471 | 0.052268 |
| WFDC2     | 20q13.12       | -0.11672 | 0.022509 | 0.05235  |
| ANKRD39   | 2q11.2         | 0.116706 | 0.022529 | 0.052391 |
| INTU      | 4q28.1         | 0.116693 | 0.022545 | 0.052421 |
| SEMA4C    | 2q11.2         | -0.11668 | 0.022561 | 0.052452 |
| ADRA1D    | 20p13          | -0.11665 | 0.022589 | 0.052511 |
| TMEM167A  | 5q14.2         | -0.11665 | 0.022591 | 0.052511 |
| EHBP1L1   | 11q13.1        | 0.116648 | 0.022597 | 0.052518 |
| SERPINA6  | 14q32.13       | -0.11664 | 0.022609 | 0.052539 |
| KIAA0040  | 1q25.1         | 0.116632 | 0.022616 | 0.052545 |
| ZNF592    | 15q25.3        | 0.116631 | 0.022616 | 0.052545 |
| HIPK3     | 11p13          | -0.11662 | 0.022632 | 0.052575 |
| CHMP4C    | 8q21.13        | -0.11661 | 0.022641 | 0.05259  |
| MEG8      | 14q32.2-q32.31 | 0.116592 | 0.022663 | 0.052634 |
| FKBP1A    | 20p13          | -0.11658 | 0.022674 | 0.052655 |
| MRPS14    | 1q25.1         | 0.116569 | 0.02269  | 0.052685 |
| PCP2      | 19p13.2        | 0.116556 | 0.022705 | 0.052713 |
| FTCD      | 21q22.3        | -0.11654 | 0.022719 | 0.052739 |
| GTF2E1    | 3q13.33        | -0.11654 | 0.022721 | 0.052739 |
| TMPRSS11E | 4q13.2         | -0.11651 | 0.022762 | 0.052827 |
| SCAND1    | 20q11.23       | -0.1165  | 0.022767 | 0.052835 |
| CLVS1     | 8q12.2-q12.3   | -0.11648 | 0.022789 | 0.052872 |
| FKBP9     | 7p14.3         | -0.11648 | 0.022789 | 0.052872 |
| PIPSL     | 10q23.33       | 0.116475 | 0.022799 | 0.052889 |
| SLC41A1   | 1q32.1         | 0.116473 | 0.022802 | 0.052889 |
| CCDC166   | 8q24.3         | 0.116458 | 0.022819 | 0.052924 |
| TMEM129   | 4p16.3         | 0.116449 | 0.02283  | 0.052944 |
| SIGLEC6   | 19q13.41       | -0.11644 | 0.022844 | 0.05297  |
| POLR3H    | 22q13.2        | 0.116413 | 0.022872 | 0.053028 |
| HCG11     | 6p22.2         | -0.11638 | 0.022906 | 0.0531   |

|           |                |          |          |          |
|-----------|----------------|----------|----------|----------|
| ZNF415    | 19q13.42       | -0.11637 | 0.022923 | 0.053133 |
| SLC25A5   | Xq24           | 0.116364 | 0.02293  | 0.053144 |
| GZMA      | 5q11.2         | -0.11636 | 0.022936 | 0.053152 |
| TRIM44    | 11p13          | -0.11635 | 0.022944 | 0.053164 |
| OR51E1    | 11p15.4        | -0.11635 | 0.022951 | 0.053175 |
| RAI1      | 17p11.2        | 0.116343 | 0.022955 | 0.053178 |
| CACNA1H   | 16p13.3        | -0.11631 | 0.02299  | 0.053253 |
| HPCAL1    | 2p25.1         | -0.1163  | 0.023003 | 0.053277 |
| LAMTOR2   | 1q22           | 0.11629  | 0.023018 | 0.053305 |
| GTF2H2B   | 5q13.2         | 0.116265 | 0.023048 | 0.053368 |
| CHRNA4    | 15q25.1        | -0.11626 | 0.023053 | 0.053374 |
| PRAM1     | 19p13.2        | -0.11625 | 0.023061 | 0.053384 |
| DANCR     | 4q12           | 0.116252 | 0.023063 | 0.053384 |
| RCOR3     | 1q32.2-q32.3   | 0.116245 | 0.023071 | 0.053397 |
| CEND1     | 11p15.5        | -0.11624 | 0.023082 | 0.053415 |
| NCF1      | 7q11.23        | -0.11622 | 0.023103 | 0.053458 |
| EXOC6     | 10q23.33       | 0.116199 | 0.023126 | 0.053505 |
| KRTAP5-10 | 11q13.4        | 0.116188 | 0.023139 | 0.053529 |
| TTY10     | Yq11.223       | -0.11618 | 0.02315  | 0.053549 |
| PLD6      | 17p11.2        | 0.116156 | 0.023178 | 0.053607 |
| LINC00899 | 22q13.31       | -0.11615 | 0.023184 | 0.053616 |
| PPWD1     | 5q12.3         | 0.116139 | 0.023198 | 0.053635 |
| UBR7      | 14q32.12       | 0.116139 | 0.023198 | 0.053635 |
| CAGE1     | 6p24.3         | 0.116121 | 0.023219 | 0.053677 |
| SRSF5     | 14q24.1        | 0.116116 | 0.023225 | 0.053685 |
| SNORD94   | 2p11.2         | 0.116106 | 0.023238 | 0.053702 |
| ASAP1     | 8q24.21-q24.22 | -0.11611 | 0.023238 | 0.053702 |
| SAAL1     | 11p15.1        | 0.116095 | 0.02325  | 0.053724 |
| CD109     | 6q13           | -0.11607 | 0.023277 | 0.053779 |
| PLEKHM3   | 2q33.3         | -0.11607 | 0.023279 | 0.053779 |
| TRANK1    | 3p22.2         | -0.11605 | 0.023301 | 0.053824 |
| NNAT      | 20q11.23       | 0.116034 | 0.023323 | 0.053869 |
| ZNF526    | 19q13.2        | 0.116019 | 0.023341 | 0.053894 |
| TMEM79    | 1q22           | 0.116019 | 0.023341 | 0.053894 |
| CYP39A1   | 6p12.3         | -0.11602 | 0.023342 | 0.053894 |
| FMR1-AS1  | Xq27.3         | 0.116016 | 0.023345 | 0.053894 |
| RAPGEF4   | 2q31.1         | -0.11601 | 0.02335  | 0.0539   |
| C17ORF49  | 17p13.1        | -0.116   | 0.023358 | 0.053912 |
| OAF       | 11q23.3        | -0.11596 | 0.023414 | 0.054035 |
| NRG4      | 15q24.2        | 0.115947 | 0.023427 | 0.054057 |
| SFXN3     | 10q24.31       | -0.11595 | 0.023429 | 0.054057 |
| ZNF230    | 19q13.31       | -0.11593 | 0.023453 | 0.054107 |
| ZNF143    | 11p15.4        | -0.11592 | 0.023462 | 0.054121 |
| NME1      | 17q21.33       | 0.115906 | 0.023477 | 0.054149 |
| BRAP      | 12q24.12       | -0.1159  | 0.02348  | 0.05415  |
| RGL2      | 6p21.32        | 0.115897 | 0.023488 | 0.054161 |
| ZNF18     | 17p12          | -0.11588 | 0.023505 | 0.054194 |
| FOXD4L6   | 9p11.2         | 0.115878 | 0.023511 | 0.054201 |
| OR5B21    | 11q12.1        | 0.115845 | 0.023551 | 0.054287 |
| MPV17L    | 16p13.11       | -0.11584 | 0.023557 | 0.054296 |
| GAD1      | 2q31.1         | 0.115832 | 0.023566 | 0.054311 |
| TUBBP5    | 9q34.3         | 0.115816 | 0.023585 | 0.054348 |
| BAIAP2    | 17q25.3        | -0.11581 | 0.023588 | 0.054348 |
| JAG1      | 20p12.2        | -0.11581 | 0.023591 | 0.054349 |
| LINC02694 | 15q14          | -0.11581 | 0.023597 | 0.054357 |
| RBM46     | 4q32.1         | -0.1158  | 0.023605 | 0.054368 |
| P2RY6     | 11q13.4        | -0.11579 | 0.023618 | 0.054391 |
| ST20      | 15q25.1        | 0.115788 | 0.02362  | 0.054391 |

|           |               |          |          |          |
|-----------|---------------|----------|----------|----------|
| SHLD1     | 20p12.3       | -0.11577 | 0.023642 | 0.05443  |
| PHF1      | 6p21.32       | -0.11577 | 0.023642 | 0.05443  |
| PSORS1C1  | 6p21.33       | 0.115767 | 0.023645 | 0.05443  |
| SIM2      | 21q22.13      | 0.115764 | 0.02365  | 0.054434 |
| ZFYVE9    | 1p32.3        | -0.11576 | 0.023653 | 0.054435 |
| MAPK3     | 16p11.2       | 0.115756 | 0.023659 | 0.054443 |
| KIAA1217  | 10p12.2-p12.1 | -0.11575 | 0.023663 | 0.054446 |
| GDF2      | 10q11.22      | -0.11574 | 0.023678 | 0.054469 |
| SDHAP3    | 5p15.33       | 0.11574  | 0.023678 | 0.054469 |
| TOPAZ1    | 3p21.31       | 0.115728 | 0.023692 | 0.054494 |
| TECPR2    | 14q32.31      | -0.11564 | 0.023798 | 0.054732 |
| ELOVL7    | 5q12.1        | 0.115634 | 0.023807 | 0.054746 |
| EGFLAM    | 5p13.2-p13.1  | -0.11562 | 0.023824 | 0.054778 |
| DMBT1     | 10q26.13      | 0.115616 | 0.023829 | 0.054784 |
| PRKAG2    | 7q36.1        | -0.11561 | 0.023843 | 0.054809 |
| SVIL      | 10p11.23      | -0.1156  | 0.023853 | 0.054827 |
| MEGF11    | 15q22.31      | -0.11558 | 0.02387  | 0.05486  |
| RICTOR    | 5p13.1        | -0.11553 | 0.023933 | 0.054998 |
| FLCN      | 17p11.2       | -0.11549 | 0.023983 | 0.055107 |
| ATCAY     | 19p13.3       | -0.11548 | 0.023997 | 0.055127 |
| FKBP2     | 11q13.1       | -0.11548 | 0.023997 | 0.055127 |
| SBNO1     | 12q24.31      | 0.115441 | 0.024044 | 0.055228 |
| CKMT2     | 5q14.1        | -0.11543 | 0.02406  | 0.055259 |
| EIF5A     | 17p13.1       | 0.115425 | 0.024063 | 0.055259 |
| PDILT     | 16p12.3       | -0.11542 | 0.024071 | 0.055271 |
| C5AR1     | 19q13.32      | -0.11542 | 0.024075 | 0.055272 |
| HELB      | 12q14.3 12q   | 0.115414 | 0.024077 | 0.055272 |
| CA13      | 8q21.2        | 0.115401 | 0.024094 | 0.055304 |
| KCNMB4    | 12q15         | -0.11535 | 0.024155 | 0.055433 |
| LRRC8B    | 1p22.2        | 0.11535  | 0.024156 | 0.055433 |
| UNC5C     | 4q22.3        | -0.11534 | 0.024169 | 0.055457 |
| ATP2A2    | 12q24.11      | 0.115332 | 0.024178 | 0.055472 |
| POLD4     | 11q13.2       | -0.11532 | 0.02419  | 0.055492 |
| ABHD17A   | 19p13.3       | 0.11531  | 0.024205 | 0.055522 |
| C20ORF197 | 20q13.33      | -0.11531 | 0.024208 | 0.055522 |
| SNX14     | 6q14.3        | -0.11526 | 0.024269 | 0.055656 |
| NKRF      | Xq24          | 0.115255 | 0.024273 | 0.055658 |
| ZNF79     | 9q33.3        | -0.11522 | 0.024314 | 0.055745 |
| CBLN2     | 18q22.3       | -0.11522 | 0.024316 | 0.055745 |
| HR        | 8p21.3        | 0.115174 | 0.024374 | 0.055871 |
| DR1       | 1p22.1        | -0.11516 | 0.024393 | 0.055907 |
| KRT17     | 17q21.2       | -0.11513 | 0.024423 | 0.055969 |
| INGX      | Xq13.1        | 0.115133 | 0.024426 | 0.055969 |
| SIN3B     | 19p13.11      | 0.115128 | 0.024431 | 0.055976 |
| ZNF252P   | 8q24.3        | -0.11512 | 0.024441 | 0.055992 |
| FLT3      | 13q12.2       | -0.11511 | 0.024459 | 0.056027 |
| SRP54     | 14q13.2       | -0.1151  | 0.024466 | 0.056037 |
| MAGEA11   | Xq28          | -0.11509 | 0.024484 | 0.05607  |
| FCGR2A    | 1q23.3        | -0.11508 | 0.024497 | 0.056095 |
| DSCAM     | 21q22.2       | -0.11507 | 0.02451  | 0.056117 |
| H2AFJ     | 12p12.3       | -0.11506 | 0.024517 | 0.056128 |
| FAM193A   | 4p16.3        | 0.115052 | 0.024527 | 0.056143 |
| EPS15     | 1p32.3        | -0.11505 | 0.024533 | 0.056151 |
| OR2T10    | 1q44          | -0.11503 | 0.024558 | 0.056203 |
| SLC43A1   | 11q12.1       | 0.11501  | 0.024579 | 0.056244 |
| SCGB3A1   | 5q35.3        | -0.115   | 0.024592 | 0.056266 |
| OR2T3     | 1q44          | -0.11498 | 0.024612 | 0.056306 |
| CASKIN1   | 16p13.3       | 0.114979 | 0.024619 | 0.056315 |

|              |          |          |          |          |
|--------------|----------|----------|----------|----------|
| COL19A1      | 6q13     | -0.11497 | 0.024629 | 0.056332 |
| KCNH3        | 12q13.12 | -0.11493 | 0.024675 | 0.056431 |
| ADAM33       | 20p13    | -0.11493 | 0.024682 | 0.05644  |
| HCG26        | 6p21.33  | 0.114917 | 0.024696 | 0.056466 |
| TPD52L2      | 20q13.33 | -0.11491 | 0.024706 | 0.056482 |
| IL2          | 4q27     | -0.11491 | 0.024708 | 0.056482 |
| PIWIL4       | 11q21    | 0.114902 | 0.024715 | 0.05649  |
| VCP          | 9p13.3   | 0.11488  | 0.024744 | 0.056549 |
| SIRT1        | 10q21.3  | -0.11488 | 0.024749 | 0.056554 |
| RNLS         | 10q23.31 | -0.11484 | 0.024792 | 0.056646 |
| GSTZ1        | 14q24.3  | -0.11483 | 0.0248   | 0.056646 |
| FAT2         | 5q33.1   | 0.114832 | 0.024804 | 0.056646 |
| LOC100134368 | 16p13.3  | 0.114832 | 0.024804 | 0.056646 |
| KRT80        | 12q13.13 | -0.11483 | 0.024805 | 0.056646 |
| TRIM78P      | 11p15    | 0.11483  | 0.024806 | 0.056646 |
| SNORA5A      | 7p13     | 0.114828 | 0.024808 | 0.056646 |
| TMIE         | 3p21.31  | -0.11482 | 0.024816 | 0.056655 |
| HYPK         | 15q15.3  | 0.114807 | 0.024835 | 0.056693 |
| LRRC57       | 15q15.2  | -0.1148  | 0.024838 | 0.056694 |
| HOGA1        | 10q24.2  | -0.1148  | 0.024849 | 0.056713 |
| SLIRP        | 14q24.3  | 0.114772 | 0.02488  | 0.056777 |
| AFF2         | Xq28     | -0.11476 | 0.0249   | 0.056815 |
| COG2         | 1q42.2   | 0.114747 | 0.024912 | 0.056836 |
| VANGL1       | 1p13.1   | 0.114735 | 0.024926 | 0.056863 |
| RIF1         | 2q23.3   | 0.114683 | 0.024993 | 0.057007 |
| OTULINL      | 5p15.2   | -0.11468 | 0.024998 | 0.057014 |
| CYP26B1      | 2p13.2   | -0.11462 | 0.025072 | 0.057175 |
| S100Z        | 5q13.3   | -0.11461 | 0.025092 | 0.057215 |
| YIPF2        | 19p13.2  | -0.1146  | 0.0251   | 0.057226 |
| CCDC7        | 10p11.22 | 0.114588 | 0.025114 | 0.057252 |
| DNAH6        | 2p11.2   | 0.114582 | 0.025122 | 0.057264 |
| RPGRIP1L     | 16q12.2  | 0.114574 | 0.025132 | 0.057281 |
| SNORA53      | 12q23.1  | 0.114565 | 0.025144 | 0.0573   |
| LOC100268168 | 5q35.1   | 0.11455  | 0.025162 | 0.057336 |
| MRPL20-AS1   | 1p36.33  | 0.114533 | 0.025184 | 0.05738  |
| CD1B         | 1q23.1   | -0.11453 | 0.025189 | 0.057383 |
| FAU          | 11q13.1  | -0.1145  | 0.025221 | 0.05745  |
| CD160        | 1q21.1   | 0.114496 | 0.025232 | 0.057468 |
| SHKBP1       | 19q13.2  | 0.114409 | 0.025344 | 0.057717 |
| STAMBPL1     | 10q23.31 | 0.114403 | 0.025352 | 0.057728 |
| ARIH2OS      | 3p21.31  | -0.11439 | 0.025367 | 0.057755 |
| GTF3C1       | 16p12.1  | 0.114385 | 0.025375 | 0.057762 |
| VDR          | 12q13.11 | 0.114385 | 0.025375 | 0.057762 |
| CIB2         | 15q25.1  | -0.11438 | 0.025383 | 0.057772 |
| PCDH20       | 13q21.2  | -0.11433 | 0.025444 | 0.057905 |
| RMDN3        | 15q15.1  | 0.11432  | 0.025459 | 0.057929 |
| HSF5         | 17q22    | -0.11432 | 0.02546  | 0.057929 |
| EFCAB14      | 1p33     | -0.11431 | 0.02547  | 0.057946 |
| GGT6         | 17p13.2  | -0.1143  | 0.025487 | 0.057978 |
| SPTY2D1      | 11p15.1  | -0.11429 | 0.025499 | 0.057997 |
| CCDC169      | 13q13.3  | -0.11425 | 0.025551 | 0.058109 |
| SFMBT1       | 3p21.1   | 0.114247 | 0.025554 | 0.058109 |
| SEL1L2       | 20p12.1  | -0.11418 | 0.025635 | 0.058288 |
| C1QTNF1      | 17q25.3  | -0.11415 | 0.025676 | 0.058374 |
| DUSP14       | 17q12    | -0.11414 | 0.025696 | 0.058412 |
| MYBPC2       | 19q13.33 | -0.11412 | 0.025714 | 0.058447 |
| ADGRE5       | 19p13.12 | 0.114115 | 0.025725 | 0.058466 |
| GNPAT        | 1q42.2   | 0.114066 | 0.025789 | 0.058603 |

|            |          |          |          |          |
|------------|----------|----------|----------|----------|
| ANKRD33    | 12q13.13 | 0.114064 | 0.025791 | 0.058603 |
| ACKR4      | 3q22.1   | -0.11406 | 0.0258   | 0.058617 |
| DHX58      | 17q21.2  | -0.11405 | 0.025811 | 0.05863  |
| TLX2       | 2p13.1   | 0.114048 | 0.025812 | 0.05863  |
| SVOPL      | 7q34     | -0.11402 | 0.025851 | 0.058712 |
| MPL        | 1p34.2   | -0.114   | 0.025878 | 0.058766 |
| RBM22      | 5q33.1   | -0.11399 | 0.025884 | 0.058772 |
| NDUFB5     | 3q26.33  | -0.11399 | 0.025891 | 0.058782 |
| FRMPD2     | 10q11.22 | -0.11398 | 0.025898 | 0.058793 |
| LRRC37A16P | 17q24.2  | -0.11397 | 0.025918 | 0.05883  |
| INSYN2B    | 5q35.1   | -0.11397 | 0.025921 | 0.05883  |
| ACTR1A     | 10q24.32 | -0.11395 | 0.025948 | 0.058884 |
| LCE2A      | 1q21.3   | 0.113943 | 0.025951 | 0.058885 |
| PVR        | 19q13.31 | 0.113897 | 0.026011 | 0.059015 |
| FBXO43     | 8q22.2   | 0.113846 | 0.026078 | 0.059159 |
| RHOC       | 1p13.2   | -0.11384 | 0.026091 | 0.059184 |
| ASCC2      | 22q12.2  | 0.113832 | 0.026097 | 0.05919  |
| MC2R       | 18p11.21 | -0.11383 | 0.026101 | 0.059193 |
| TMUB1      | 7q36.1   | 0.113818 | 0.026115 | 0.059217 |
| RPS29      | 14q21.3  | -0.11378 | 0.026171 | 0.059338 |
| PIGX       | 3q29     | 0.11376  | 0.026192 | 0.059377 |
| IAH1       | 2p25.1   | -0.11376 | 0.026197 | 0.059377 |
| TAS1R3     | 1p36.33  | -0.11376 | 0.026197 | 0.059377 |
| UGT2B10    | 4q13.2   | -0.11374 | 0.026222 | 0.059425 |
| PLCD4      | 2q35     | 0.113721 | 0.026244 | 0.059468 |
| SAMD10     | 20q13.33 | 0.113719 | 0.026246 | 0.059468 |
| RCN3       | 19q13.33 | -0.1137  | 0.026273 | 0.059522 |
| ICOS       | 2q33.2   | -0.1137  | 0.026277 | 0.059525 |
| PDCD2L     | 19q13.11 | 0.113683 | 0.026294 | 0.059552 |
| FZD10      | 12q24.33 | -0.11368 | 0.026295 | 0.059552 |
| ZNHIT3     | 17q12    | -0.11367 | 0.026305 | 0.059567 |
| LIMK2      | 22q12.2  | 0.113664 | 0.02632  | 0.059594 |
| TPI1       | 12p13.31 | 0.113657 | 0.026328 | 0.059606 |
| RSPRY1     | 16q13    | -0.11365 | 0.026332 | 0.059609 |
| GPR149     | 3q25.2   | -0.11365 | 0.02634  | 0.059614 |
| FOXP3      | Xp11.23  | -0.11365 | 0.026341 | 0.059614 |
| SCN10A     | 3p22.2   | -0.11358 | 0.026425 | 0.059798 |
| ZNF426     | 19p13.2  | -0.11358 | 0.026431 | 0.059804 |
| CYP4F12    | 19p13.12 | 0.113552 | 0.026468 | 0.059883 |
| PDAP1      | 7q22.1   | 0.113523 | 0.026508 | 0.059966 |
| KCNA3      | 1p13.3   | -0.11351 | 0.026524 | 0.059994 |
| PTCH2      | 1p34.1   | -0.11351 | 0.026527 | 0.059994 |
| ZNF503-AS2 | 10q22.2  | -0.11351 | 0.026531 | 0.059998 |
| CD82       | 11p11.2  | -0.11349 | 0.026558 | 0.060051 |
| PRDX2      | 19p13.13 | 0.113468 | 0.026581 | 0.060097 |
| GNG3       | 11q12.3  | 0.11343  | 0.026633 | 0.060207 |
| FAM157B    | 9q34.3   | 0.113412 | 0.026657 | 0.060256 |
| CHAMP1     | 13q34    | 0.113401 | 0.026671 | 0.060281 |
| KCNC4      | 1p13.3   | 0.113367 | 0.026717 | 0.06037  |
| PKD1L2     | 16q23.2  | -0.11337 | 0.026717 | 0.06037  |
| UQCRB      | 8q22.1   | -0.11336 | 0.026729 | 0.060389 |
| SUPT3H     | 6p21.1   | -0.11334 | 0.026748 | 0.060426 |
| XPO7       | 8p21.3   | 0.11334  | 0.026754 | 0.060434 |
| IVNS1ABP   | 1q25.3   | 0.113336 | 0.026759 | 0.060437 |
| TBX15      | 1p12     | -0.11333 | 0.026762 | 0.060437 |
| MOB3A      | 19p13.3  | -0.11332 | 0.026778 | 0.060466 |
| HADH       | 4q25     | 0.113294 | 0.026815 | 0.060545 |
| HMGB3P1    | 20q11.22 | 0.113284 | 0.02683  | 0.06057  |



|              |                |          |          |          |
|--------------|----------------|----------|----------|----------|
| ADAL         | 15q15.3        | -0.11323 | 0.026901 | 0.06072  |
| KRTAP10-8    | 21q22.3        | 0.11323  | 0.026902 | 0.06072  |
| CNTNAP1      | 17q21.2        | -0.1132  | 0.026944 | 0.060807 |
| CRYM         | 16p12.2        | -0.11319 | 0.026952 | 0.06082  |
| ZIC2         | 13q32.3        | 0.113176 | 0.026976 | 0.060867 |
| NGLY1        | 3p24.2         | -0.11317 | 0.026982 | 0.060873 |
| SEC14L1P1    | 11p11.2        | 0.113167 | 0.026988 | 0.060879 |
| ADAM19       | 5q33.3         | -0.11314 | 0.027026 | 0.060959 |
| CALM2        | 2p21           | -0.11311 | 0.027064 | 0.061037 |
| AP2A1        | 19q13.33       | 0.113086 | 0.027099 | 0.061108 |
| TMEM147      | 19q13.12       | 0.113083 | 0.027102 | 0.061109 |
| PUS3         | 11q24.2        | -0.11307 | 0.027116 | 0.061133 |
| SLC30A3      | 2p23.3         | -0.11307 | 0.027123 | 0.061142 |
| MMP24        | 20q11.22       | -0.11304 | 0.027164 | 0.061228 |
| PRPSAP1      | 17q25.1        | -0.11303 | 0.027171 | 0.061238 |
| RPL23AP53    | 8p23.3         | -0.11301 | 0.0272   | 0.061295 |
| SSX2         | Xp11.22        | 0.112997 | 0.027221 | 0.061336 |
| MFSD11       | 17q25.1-q25.2  | -0.11299 | 0.027232 | 0.061355 |
| NEDD4        | 15q21.3        | -0.11298 | 0.027244 | 0.061374 |
| ZNF536       | 19q12          | -0.11294 | 0.027305 | 0.061504 |
| GDAP1        | 8q21.11        | -0.11293 | 0.027318 | 0.061527 |
| CAPS         | 19p13.3        | -0.11292 | 0.02733  | 0.061547 |
| ANGEL2       | 1q32.3         | 0.112912 | 0.027336 | 0.061554 |
| LRG1         | 19p13.3        | 0.112882 | 0.027378 | 0.061641 |
| DNAJC5       | 20q13.33       | 0.112868 | 0.027397 | 0.061677 |
| CCDC125      | 5q13.2         | 0.112853 | 0.027418 | 0.061718 |
| UEVLD        | 11p15.1        | -0.11284 | 0.027435 | 0.061748 |
| SNORA40      | 11q21          | 0.112831 | 0.027448 | 0.061772 |
| TPGS1        | 19p13.3        | 0.112821 | 0.027462 | 0.061796 |
| CTU2         | 16q24.3        | 0.112815 | 0.02747  | 0.061807 |
| CD24         | 6q21           | -0.1128  | 0.027489 | 0.061843 |
| SNTG2        | 2p25.3         | -0.11274 | 0.027569 | 0.062015 |
| RNF34        | 12q24.31       | 0.112735 | 0.027582 | 0.062037 |
| SPNS3        | 17p13.2        | -0.11273 | 0.027593 | 0.062056 |
| MIRLET7BHG   | 22q13.31       | 0.11272  | 0.027602 | 0.062069 |
| PRDM11       | 11p11.2        | -0.1127  | 0.027634 | 0.062133 |
| BRF2         | 8p11.23        | -0.11266 | 0.02769  | 0.062253 |
| TTLL9        | 20q11.21       | -0.11265 | 0.0277   | 0.062266 |
| UNC93A       | 6q27           | 0.112648 | 0.027702 | 0.062266 |
| C12ORF54     | 12q13.11       | -0.1126  | 0.027767 | 0.062405 |
| COL1A1       | 17q21.33       | -0.11258 | 0.027792 | 0.062453 |
| LOC100272216 | -              | 0.112564 | 0.027819 | 0.062507 |
| FAM204A      | 10q26.11       | -0.11256 | 0.027823 | 0.062509 |
| WASL         | 7q31.32        | -0.11256 | 0.027826 | 0.062509 |
| PALD1        | 10q22.1        | 0.112552 | 0.027835 | 0.062523 |
| S1PR5        | 19p13.2        | -0.11255 | 0.027844 | 0.062536 |
| SNORA29      | 6q25.3         | 0.112521 | 0.02788  | 0.062609 |
| CAPRN2       | 12p11.21       | 0.112498 | 0.027911 | 0.062672 |
| CLGN         | 4q31.1         | -0.11248 | 0.027939 | 0.062729 |
| DPH6         | 15q14          | -0.11247 | 0.027945 | 0.062735 |
| NRG3         | 10q23.1        | -0.11247 | 0.02795  | 0.062739 |
| LCN15        | 9q34.3         | -0.11247 | 0.027957 | 0.062748 |
| PTPN6        | 12p13.31       | -0.11246 | 0.02797  | 0.06277  |
| MALL         | 2q13           | 0.112431 | 0.028005 | 0.062841 |
| GTF2F1       | 19p13.3        | 0.112406 | 0.02804  | 0.062913 |
| PRSS12       | 4q26           | 0.112392 | 0.02806  | 0.062951 |
| TRPM3        | 9q21.12-q21.13 | -0.11239 | 0.028063 | 0.062951 |
| NANOG        | 12p13.31       | 0.112368 | 0.028094 | 0.063012 |

|            |          |          |          |          |
|------------|----------|----------|----------|----------|
| KIF12      | 9q32     | 0.112335 | 0.028141 | 0.06311  |
| NUTM2A     | 10q23.2  | -0.11232 | 0.028162 | 0.063151 |
| TSSK1B     | 5q22.2   | -0.11231 | 0.02817  | 0.063157 |
| CCDC116    | 22q11.21 | 0.11231  | 0.028176 | 0.063157 |
| CDKN2AIPNL | 5q31.1   | -0.11231 | 0.028176 | 0.063157 |
| SLC4A11    | 20p13    | 0.112309 | 0.028178 | 0.063157 |
| WTAP       | 6q25.3   | -0.11226 | 0.028243 | 0.063296 |
| HIPK4      | 19q13.2  | -0.11226 | 0.028247 | 0.063299 |
| RPL23P8    | 7p21.1   | -0.11222 | 0.028299 | 0.063408 |
| TCAF2      | 7q35     | -0.11222 | 0.028309 | 0.063425 |
| RNASE9     | 14q11.2  | 0.112196 | 0.028337 | 0.063479 |
| WDR75      | 2q32.2   | 0.112191 | 0.028344 | 0.063487 |
| TNNT1      | 19q13.42 | 0.112157 | 0.028392 | 0.063589 |
| SNORA55    | 1p34.3   | 0.112139 | 0.028417 | 0.063638 |
| PCSK4      | 19p13.3  | 0.11213  | 0.02843  | 0.063659 |
| CLEC4E     | 12p13.31 | -0.11213 | 0.028433 | 0.063659 |
| KLK2       | 19q13.33 | -0.11212 | 0.028443 | 0.063675 |
| PCDHB8     | 5q31.3   | -0.11211 | 0.028453 | 0.06369  |
| RPL38      | 17q25.1  | -0.11211 | 0.028461 | 0.063701 |
| NBAS       | 2p24.3   | -0.11206 | 0.028526 | 0.063839 |
| HARS       | 5q31.3   | 0.112029 | 0.028575 | 0.06394  |
| HOXA10     | 7p15.2   | 0.11202  | 0.028588 | 0.063962 |
| PCDHGB8P   | 5q31.3   | 0.112015 | 0.028595 | 0.063971 |
| RPS6KB2    | 11q13.2  | 0.111969 | 0.028661 | 0.064112 |
| KPTN       | 19q13.32 | 0.111958 | 0.028677 | 0.06414  |
| DOP1A      | 6q14.1   | 0.111934 | 0.02871  | 0.064208 |
| LHX8       | 1p31.1   | -0.11191 | 0.028752 | 0.064284 |
| MKRN3      | 15q11.2  | -0.1119  | 0.028757 | 0.064284 |
| KCNC2      | 12q21.1  | -0.1119  | 0.028759 | 0.064284 |
| GYPE       | 4q31.21  | -0.1119  | 0.028759 | 0.064284 |
| ZNF85      | 19p12    | -0.1119  | 0.028761 | 0.064284 |
| SLC35B3    | 6p24.3   | -0.1119  | 0.028764 | 0.064284 |
| GIT2       | 12q24.11 | -0.11187 | 0.028806 | 0.06437  |
| RAB11FIP5  | 2p13.2   | -0.11187 | 0.028809 | 0.06437  |
| CYP4F22    | 19p13.12 | -0.11186 | 0.028815 | 0.064377 |
| UBE2R2     | 9p13.3   | -0.11183 | 0.028853 | 0.064456 |
| SLC9C2     | 1q25.1   | 0.111831 | 0.028858 | 0.064459 |
| TOR1AIP2   | 1q25.2   | 0.11182  | 0.028874 | 0.064488 |
| MSTN       | 2q32.2   | -0.11178 | 0.028926 | 0.064596 |
| ZNF713     | 7p11.2   | -0.11178 | 0.028931 | 0.0646   |
| ZSCAN29    | 15q15.3  | 0.111773 | 0.028943 | 0.064619 |
| RBBP7      | Xp22.2   | 0.111757 | 0.028965 | 0.064653 |
| SNORA27    | 13q12.2  | 0.111756 | 0.028966 | 0.064653 |
| MRC1       | 10p12.33 | -0.11176 | 0.028967 | 0.064653 |
| PLIN3      | 19p13.3  | -0.11175 | 0.028975 | 0.064662 |
| THAP12     | 11q13.5  | -0.11173 | 0.029001 | 0.064711 |
| BEND3P3    | 10q22.3  | 0.111731 | 0.029003 | 0.064711 |
| ING3       | 7q31.31  | -0.11171 | 0.02903  | 0.064763 |
| CHST12     | 7p22.3   | -0.11168 | 0.02907  | 0.064843 |
| C8ORF33    | 8q24.3   | -0.11168 | 0.029072 | 0.064843 |
| ZBED6CL    | 7q36.1   | -0.11168 | 0.02908  | 0.064853 |
| RPPH1      | 14q11.2  | -0.11167 | 0.029094 | 0.064877 |
| JMJD4      | 1q42.13  | 0.111653 | 0.029116 | 0.06491  |
| BEX5       | Xq22.1   | -0.11165 | 0.029117 | 0.06491  |
| RBIS       | 8q21.2   | -0.11165 | 0.029118 | 0.06491  |
| FCRL6      | 1q23.2   | -0.11165 | 0.029127 | 0.064923 |
| ZNF800     | 7q31.33  | -0.11164 | 0.029132 | 0.064925 |
| NT5DC2     | 3p21.1   | 0.111631 | 0.029148 | 0.064956 |

|              |          |          |          |          |
|--------------|----------|----------|----------|----------|
| DPYSL4       | 10q26.3  | -0.11162 | 0.029159 | 0.064971 |
| IRAK3        | 12q14.3  | -0.11161 | 0.029179 | 0.06501  |
| ZC3HC1       | 7q32.2   | -0.1116  | 0.029191 | 0.065026 |
| PPAT         | 4q12     | 0.111598 | 0.029195 | 0.065026 |
| LPCAT1       | 5p15.33  | 0.111598 | 0.029196 | 0.065026 |
| BTRC         | 10q24.32 | -0.11159 | 0.029208 | 0.065045 |
| C5ORF51      | 5p13.1   | -0.11158 | 0.029219 | 0.065063 |
| CNGA4        | 11p15.4  | 0.111551 | 0.029264 | 0.065151 |
| PPFIA1       | 11q13.3  | 0.11155  | 0.029266 | 0.065151 |
| KCNC3        | 19q13.33 | 0.111546 | 0.029272 | 0.065159 |
| LIMS1        | 2q12.3   | -0.11154 | 0.029279 | 0.065168 |
| ARPP21       | 3p22.3   | -0.11153 | 0.029296 | 0.065192 |
| ZNF662       | 3p22.1   | -0.11153 | 0.0293   | 0.065192 |
| HCN2         | 19p13.3  | -0.11153 | 0.0293   | 0.065192 |
| GGNBP1       | 6p21.31  | 0.111515 | 0.029317 | 0.065223 |
| PGAM2        | 7p13     | 0.111493 | 0.02935  | 0.065284 |
| MPC2         | 1q24.2   | 0.111492 | 0.029351 | 0.065284 |
| ZNF33A       | 10p11.1  | 0.111469 | 0.029384 | 0.065348 |
| LCORL        | 4p15.31  | 0.111467 | 0.029387 | 0.065348 |
| SOD2         | 6q25.3   | -0.11145 | 0.02941  | 0.065393 |
| PLB1         | 2p23.2   | -0.11144 | 0.02942  | 0.065408 |
| PP2D1        | 3p24.3   | 0.111425 | 0.029448 | 0.065464 |
| RIMBP3C      | 22q11.21 | -0.11142 | 0.029462 | 0.065486 |
| MYL12A       | 18p11.31 | -0.11138 | 0.029511 | 0.065588 |
| FNDC9        | 5q33.3   | -0.11138 | 0.029518 | 0.065596 |
| LOC100133920 | 2q11.1   | -0.11137 | 0.029533 | 0.065621 |
| RC3H1        | 1q25.1   | 0.111366 | 0.029535 | 0.065621 |
| UTP3         | 4q13.3   | 0.111363 | 0.02954  | 0.065623 |
| HPSE2        | 10q24.2  | -0.11135 | 0.029558 | 0.065657 |
| SLC1A5       | 19q13.32 | 0.111345 | 0.029567 | 0.065668 |
| CCT8         | 21q21.3  | 0.111337 | 0.029577 | 0.065684 |
| PHF8         | Xp11.22  | 0.111334 | 0.029582 | 0.065687 |
| GGCX         | 2p11.2   | -0.11132 | 0.029606 | 0.065734 |
| ZNF329       | 19q13.43 | -0.11129 | 0.029648 | 0.065818 |
| IGBP1P1      | 14q13.2  | -0.11129 | 0.029651 | 0.065818 |
| HOXA5        | 7p15.2   | 0.111268 | 0.029679 | 0.065875 |
| DKK1         | 10q21.1  | -0.11126 | 0.029685 | 0.06588  |
| ZNF311       | 6p22.1   | 0.111246 | 0.029711 | 0.065929 |
| MTUS2        | 13q12.3  | -0.11124 | 0.029714 | 0.065929 |
| ARHGAP44     | 17p12    | -0.11123 | 0.029737 | 0.06597  |
| LRIG3        | 12q14.1  | 0.111228 | 0.029739 | 0.06597  |
| DMC1         | 22q13.1  | 0.111223 | 0.029746 | 0.065972 |
| PWRN1        | 15q11.2  | -0.11122 | 0.029748 | 0.065972 |
| PCDHGB2      | 5q31.3   | -0.11122 | 0.02975  | 0.065972 |
| ABHD5        | 3p21.33  | -0.1112  | 0.029783 | 0.066039 |
| ORM1         | 9q32     | -0.11117 | 0.029826 | 0.066127 |
| CYTL1        | 4p16.2   | -0.11115 | 0.029854 | 0.066177 |
| C2CD4B       | 15q22.2  | 0.111147 | 0.029858 | 0.066177 |
| CDK5R2       | 2q35     | -0.11115 | 0.029859 | 0.066177 |
| C20ORF202    | 20p13    | -0.11113 | 0.029881 | 0.06622  |
| TNC          | 9q33.1   | -0.11111 | 0.029912 | 0.066282 |
| MAGEC1       | Xq27.2   | -0.11108 | 0.029956 | 0.066371 |
| PDIA2        | 16p13.3  | 0.111045 | 0.03001  | 0.066483 |
| CYBA         | 16q24.2  | 0.11104  | 0.030017 | 0.066492 |
| C9ORF85      | 9q21.13  | -0.111   | 0.03008  | 0.066623 |
| UBE2L6       | 11q12.1  | -0.11098 | 0.030109 | 0.06668  |
| RIPOR1       | 16q22.1  | -0.11097 | 0.030123 | 0.066703 |
| AGTRAP       | 1p36.22  | 0.110965 | 0.030129 | 0.066703 |

|           |               |          |          |          |
|-----------|---------------|----------|----------|----------|
| UPK1A     | 19q13.12      | 0.110965 | 0.03013  | 0.066703 |
| TRAF4     | 17q11.2       | 0.110963 | 0.030132 | 0.066703 |
| NR4A3     | 9q31.1        | -0.11095 | 0.030154 | 0.066742 |
| GCSAML    | 1q44          | -0.11094 | 0.030168 | 0.066766 |
| CPNE6     | 14q11.2       | -0.11092 | 0.030195 | 0.066819 |
| UBR2      | 6p21.1        | 0.110901 | 0.030225 | 0.066879 |
| TUBB2B    | 6p25.2        | -0.1109  | 0.030231 | 0.066883 |
| NID2      | 14q22.1       | -0.11089 | 0.030237 | 0.06689  |
| MICOS10   | 1p36.13       | 0.110879 | 0.030259 | 0.066931 |
| UBAC2     | 13q32.3       | -0.11087 | 0.030266 | 0.066941 |
| RALGPS2   | 1q25.2        | 0.11087  | 0.030272 | 0.066941 |
| MFAP1     | 15q15.3       | -0.11087 | 0.030274 | 0.066941 |
| SNORA2A   | 12q13.11      | 0.110855 | 0.030294 | 0.066979 |
| MED13     | 17q23.2       | -0.11085 | 0.030304 | 0.066995 |
| GUCA1A    | 6p21.1        | -0.11084 | 0.030314 | 0.067001 |
| TYRO3     | 15q15.1       | 0.110842 | 0.030314 | 0.067001 |
| TPRG1     | 3q28          | -0.11084 | 0.030322 | 0.067011 |
| TRIM39    | 6p22.1        | 0.110824 | 0.030341 | 0.067046 |
| RBMS2     | 12q13.3       | -0.11082 | 0.03035  | 0.067058 |
| MYPOP     | 19q13.32      | 0.110814 | 0.030356 | 0.067065 |
| ZNF319    | 16q21         | -0.11081 | 0.03036  | 0.067067 |
| RTN3      | 11q13.1       | -0.1108  | 0.030374 | 0.067088 |
| ZHX3      | 20q12         | 0.110796 | 0.030383 | 0.067101 |
| XCR1      | 3p21.31       | -0.11079 | 0.030396 | 0.067123 |
| TAC4      | 17q21.33      | 0.110775 | 0.030415 | 0.067158 |
| AGAP2-AS1 | 12q14.1       | -0.11076 | 0.030435 | 0.067196 |
| FOXP2     | 7q31.1        | -0.11075 | 0.030456 | 0.067234 |
| DAPK2     | 15q22.31      | -0.11072 | 0.030491 | 0.067303 |
| ADGRE1    | 19p13.3-p13.2 | -0.1107  | 0.030533 | 0.067389 |
| PRR25     | 16p13.3       | 0.110686 | 0.03055  | 0.067417 |
| TMEM270   | 7q11.23       | 0.110682 | 0.030554 | 0.067417 |
| TNFAIP1   | 17q11.2       | -0.11068 | 0.030556 | 0.067417 |
| RIT1      | 1q22          | -0.11068 | 0.030561 | 0.067421 |
| ABCC4     | 13q32.1       | -0.11066 | 0.030586 | 0.067469 |
| LAMC1     | 1q25.3        | -0.11066 | 0.030592 | 0.067475 |
| C10ORF88  | 10q26.13      | -0.11065 | 0.03061  | 0.067501 |
| PRR15     | 7p14.3        | -0.11065 | 0.030611 | 0.067501 |
| PLEKHJ1   | 19p13.3       | 0.110633 | 0.030629 | 0.067533 |
| NOL3      | 16q22.1       | 0.110626 | 0.030641 | 0.067552 |
| CPEB2     | 4p15.32       | -0.11062 | 0.030655 | 0.067575 |
| HPDL      | 1p34.1        | 0.110611 | 0.030662 | 0.067584 |
| PRKX      | Xp22.33       | 0.110595 | 0.030686 | 0.06763  |
| SOAT2     | 12q13.13      | -0.11057 | 0.030719 | 0.067696 |
| RTL1      | 14q32.2       | -0.11053 | 0.030779 | 0.067819 |
| AKIRIN1   | 1p34.3        | -0.11053 | 0.030788 | 0.067833 |
| PLCB4     | 20p12.3-p12.2 | -0.11053 | 0.030793 | 0.067836 |
| ZFP28     | 19q13.43      | -0.11051 | 0.030821 | 0.067889 |
| C17ORF58  | 17q24.2       | -0.11049 | 0.03085  | 0.067945 |
| VTI1B     | 14q24.1       | -0.11046 | 0.03089  | 0.068026 |
| DNAJC12   | 10q21.3       | -0.11043 | 0.030943 | 0.068135 |
| RPL30     | 8q22.2        | -0.11042 | 0.030956 | 0.068156 |
| TFPT      | 19q13.42      | -0.11037 | 0.031036 | 0.068325 |
| ALDH9A1   | 1q24.1        | 0.110361 | 0.031043 | 0.068334 |
| LRP2      | 2q31.1        | -0.11034 | 0.031072 | 0.068389 |
| ECE2      | 3q27.1        | 0.110324 | 0.031101 | 0.068445 |
| GBP1      | 1p22.2        | -0.11032 | 0.031104 | 0.068445 |
| SPSB2     | 12p13.31      | 0.110305 | 0.03113  | 0.068495 |
| IGF2-AS   | 11p15.5       | -0.1103  | 0.031134 | 0.068497 |

|           |              |          |          |          |
|-----------|--------------|----------|----------|----------|
| PTK2      | 8q24.3       | -0.1103  | 0.03114  | 0.068502 |
| UIMC1     | 5q35.2       | 0.110291 | 0.031152 | 0.068521 |
| PHF21B    | 22q13.31     | -0.11028 | 0.031162 | 0.068535 |
| SRPRA     | 11q24.2      | -0.11027 | 0.031181 | 0.068569 |
| ZNF334    | 20q13.12     | -0.11026 | 0.031192 | 0.068581 |
| RAPGEFL1  | 17q21.1      | 0.110264 | 0.031193 | 0.068581 |
| MT1M      | 16q13        | -0.11026 | 0.0312   | 0.068585 |
| TREML1    | 6p21.1       | -0.11026 | 0.031202 | 0.068585 |
| TOMM7     | 7p15.3       | -0.11025 | 0.031207 | 0.068589 |
| STAG3L4   | 7q11.21      | -0.11025 | 0.031214 | 0.068594 |
| FAM138B   | 2q14.1       | -0.11025 | 0.031216 | 0.068594 |
| SDF2L1    | 22q11.21     | 0.110229 | 0.031247 | 0.068654 |
| HSPBAP1   | 3q21.1       | -0.1102  | 0.031289 | 0.068739 |
| DNAJA3    | 16p13.3      | 0.110192 | 0.031304 | 0.068765 |
| SLCO2A1   | 3q22.1-q22.2 | -0.11018 | 0.031321 | 0.068792 |
| HERC2     | 15q13.1      | 0.110179 | 0.031323 | 0.068792 |
| VPS28     | 8q24.3       | -0.1101  | 0.031453 | 0.069069 |
| KLHL23    | 2q31.1       | -0.11008 | 0.031472 | 0.069103 |
| ABCG5     | 2p21         | 0.110077 | 0.031483 | 0.069119 |
| EFCAB2    | 1q44         | -0.11005 | 0.031531 | 0.069217 |
| RNF222    | 17p13.1      | 0.110028 | 0.031559 | 0.069271 |
| PRO0628   | 20q12        | 0.110003 | 0.031597 | 0.069348 |
| CIB4      | 2p23.3       | -0.11    | 0.031603 | 0.069353 |
| AMD1      | 6q21         | 0.109962 | 0.03166  | 0.069471 |
| ANKRD44   | 2q33.1       | -0.10996 | 0.031664 | 0.069471 |
| CASS4     | 20q13.31     | -0.10995 | 0.031679 | 0.06949  |
| FBXO34    | 14q22.3      | -0.10995 | 0.031679 | 0.06949  |
| DRP2      | Xq22.1       | -0.10993 | 0.031709 | 0.069547 |
| GCGR      | 17q25.3      | 0.109928 | 0.031714 | 0.069551 |
| ENY2      | 8q23.1       | -0.10983 | 0.031864 | 0.069872 |
| HAPLN3    | 15q26.1      | -0.10983 | 0.031868 | 0.069874 |
| SLC39A13  | 11p11.2      | -0.10982 | 0.031884 | 0.069899 |
| ZCCHC2    | 18q21.33     | 0.109811 | 0.031897 | 0.069921 |
| GJD3      | 17q21.2      | -0.10981 | 0.031905 | 0.069932 |
| ZIC4      | 3q24         | -0.1098  | 0.031915 | 0.069938 |
| LGR4      | 11p14.1      | 0.109798 | 0.031917 | 0.069938 |
| FUT3      | 19p13.3      | 0.109797 | 0.031919 | 0.069938 |
| SNORA71B  | 20q11.23     | 0.109777 | 0.031951 | 0.070002 |
| IL16      | 15q25.1      | -0.10977 | 0.031961 | 0.070015 |
| ZPBP2     | 17q21.1      | 0.109763 | 0.031973 | 0.070034 |
| MT2A      | 16q13        | -0.10974 | 0.032008 | 0.070103 |
| LINC00426 | 13q12.3      | -0.10974 | 0.032015 | 0.070111 |
| PITPNM1   | 11q13.2      | 0.109734 | 0.032019 | 0.070111 |
| EPM2AIP1  | 3p22.2       | -0.10973 | 0.032031 | 0.070131 |
| VAMP3     | 1p36.23      | -0.10972 | 0.032034 | 0.070131 |
| SCNN1B    | 16p12.2      | -0.10972 | 0.032041 | 0.070132 |
| CD70      | 19p13.3      | -0.10972 | 0.032042 | 0.070132 |
| ZNF593    | 1p36.11      | 0.109706 | 0.032063 | 0.070169 |
| CFAP298   | 21q22.11     | 0.109693 | 0.032083 | 0.070205 |
| FAM104B   | Xp11.21      | -0.10967 | 0.032112 | 0.070261 |
| ADAMTS2   | 5q35.3       | -0.10967 | 0.032123 | 0.070278 |
| MPP1      | Xq28         | -0.10965 | 0.032145 | 0.070319 |
| LINC00705 | 10p15.1      | 0.109646 | 0.032157 | 0.070337 |
| RGS6      | 14q24.2      | -0.10964 | 0.032164 | 0.070345 |
| PRR4      | 12p13.2      | 0.109631 | 0.03218  | 0.070373 |
| CFAP43    | 10q25.1      | 0.109619 | 0.0322   | 0.070402 |
| GRAP2     | 22q13.1      | -0.10962 | 0.032205 | 0.070402 |
| ERF       | 19q13.2      | 0.109615 | 0.032205 | 0.070402 |

|              |                |          |          |          |
|--------------|----------------|----------|----------|----------|
| PIBF1        | 13q21.33-q22.1 | -0.10961 | 0.032208 | 0.070402 |
| CUEDC2       | 10q24.32       | -0.10961 | 0.032213 | 0.070407 |
| ZNF512B      | 20q13.33       | -0.10959 | 0.032253 | 0.070486 |
| C6           | 5p13.1         | -0.10955 | 0.032313 | 0.070609 |
| RAB12        | 18p11.22       | -0.10954 | 0.032328 | 0.070635 |
| ZER1         | 9q34.11        | -0.10952 | 0.032361 | 0.070696 |
| ZNF358       | 19p13.2        | -0.10952 | 0.032363 | 0.070696 |
| OR2J3        | 6p22.1         | 0.1095   | 0.032389 | 0.070744 |
| CHMP2A       | 19q13.43       | -0.10946 | 0.032444 | 0.070834 |
| ULK4         | 3p22.1         | 0.109464 | 0.032445 | 0.070834 |
| BCL2L15      | 1p13.2         | 0.109464 | 0.032446 | 0.070834 |
| ERICH3       | 1p31.1         | -0.10946 | 0.032446 | 0.070834 |
| GLYCTK       | 3p21.2         | 0.109462 | 0.03245  | 0.070834 |
| LAMTOR4      | 7q22.1         | -0.10946 | 0.032451 | 0.070834 |
| ZNF71        | 19q13.43       | -0.10944 | 0.032491 | 0.070904 |
| TBL2         | 7q11.23        | -0.10944 | 0.032491 | 0.070904 |
| CAMK2B       | 7p13           | -0.10941 | 0.032532 | 0.070988 |
| HSPA1B       | 6p21.33        | 0.109391 | 0.032562 | 0.071046 |
| RBFOX3       | 17q25.3        | 0.109378 | 0.032583 | 0.071083 |
| RNF186       | 1p36.13        | -0.10937 | 0.032598 | 0.071108 |
| PLAAT4       | 11q12.3        | -0.10937 | 0.032603 | 0.071111 |
| ANXA8        | 10q11.22       | -0.10935 | 0.032623 | 0.071146 |
| DGAT2L6      | Xq13.1         | 0.109351 | 0.032626 | 0.071146 |
| CCL1         | 17q12          | -0.10934 | 0.032648 | 0.071187 |
| RTP4         | 3q27.3         | -0.10932 | 0.032681 | 0.071249 |
| WFDC3        | 20q13.12       | -0.1093  | 0.032716 | 0.071318 |
| FRK          | 6q22.1         | 0.109287 | 0.032729 | 0.071328 |
| FCRL2        | 1q23.1         | -0.10929 | 0.03273  | 0.071328 |
| TRIM31       | 6p22.1         | 0.109286 | 0.032731 | 0.071328 |
| ERI1         | 8p23.1         | 0.109276 | 0.032746 | 0.071352 |
| TCF7L2       | 10q25.2-q25.3  | 0.109269 | 0.032757 | 0.071369 |
| CNOT9        | 2q35           | 0.109265 | 0.032764 | 0.071378 |
| LOC100130872 | 4p16.3         | -0.10925 | 0.032786 | 0.071416 |
| LAS1L        | Xq12           | 0.109247 | 0.032793 | 0.071425 |
| ODF3L1       | 15q24.2        | -0.10924 | 0.03281  | 0.071453 |
| NRDC         | 1p32.3         | 0.109234 | 0.032814 | 0.071453 |
| EBF2         | 8p21.2         | -0.1092  | 0.032865 | 0.071557 |
| DTNBP1       | 6p22.3         | 0.109198 | 0.032871 | 0.071564 |
| ZNF675       | 19p12          | -0.10919 | 0.032889 | 0.071594 |
| GREB1L       | 18q11.1-q11.2  | -0.10918 | 0.032897 | 0.071603 |
| HPYR1        | 8q24.22        | 0.109173 | 0.032912 | 0.071626 |
| PLLP         | 16q13          | 0.109172 | 0.032914 | 0.071626 |
| SYT14        | 1q32.2         | -0.10916 | 0.032925 | 0.071641 |
| NLGN3        | Xq13.1         | -0.10916 | 0.032928 | 0.071641 |
| GPD2         | 2q24.1         | 0.109135 | 0.032974 | 0.071732 |
| ZNF566       | 19q13.12       | -0.10913 | 0.032978 | 0.071733 |
| DGAT2        | 11q13.5        | -0.10912 | 0.032992 | 0.071755 |
| ZNF398       | 7q36.1         | 0.109119 | 0.033    | 0.071765 |
| USP7         | 16p13.2        | 0.109107 | 0.033019 | 0.071799 |
| TAF3         | 1p13.2         | -0.1091  | 0.033022 | 0.071799 |
| ZNF175       | 19q13.41       | -0.10909 | 0.033044 | 0.071838 |
| GNB1         | 1p36.33        | -0.10907 | 0.033081 | 0.071911 |
| SGCZ         | 8p22           | -0.10904 | 0.033119 | 0.071986 |
| FHL2         | 2q12.2         | -0.10904 | 0.033128 | 0.071997 |
| SPTSSA       | 14q13.1        | -0.10903 | 0.033135 | 0.071999 |
| LINC01512    | 6p21.1         | -0.10903 | 0.033136 | 0.071999 |
| APLN         | Xq26.1         | 0.108972 | 0.033237 | 0.072211 |
| TLE1         | 9q21.32        | 0.10893  | 0.033305 | 0.072349 |

|            |          |          |          |          |
|------------|----------|----------|----------|----------|
| VSTM5      | 11q21    | 0.108929 | 0.033308 | 0.072349 |
| NR1H2      | 19q13.33 | -0.10891 | 0.033345 | 0.072423 |
| SRARP      | 1p36.13  | -0.1089  | 0.033361 | 0.072448 |
| SERTAD4    | 1q32.2   | -0.10888 | 0.033393 | 0.072508 |
| ARHGAP1    | 11p11.2  | -0.10887 | 0.033396 | 0.072508 |
| CHMP1A     | 16q24.3  | 0.108871 | 0.033403 | 0.072515 |
| IMPA2      | 18p11.21 | 0.108868 | 0.033407 | 0.072517 |
| TYW3       | 1p31.1   | -0.10886 | 0.033419 | 0.072535 |
| ZBTB1      | 14q23.3  | -0.10878 | 0.033545 | 0.072801 |
| WIPI2      | 7p22.1   | -0.10878 | 0.033559 | 0.072823 |
| JCHAIN     | 4q13.3   | -0.10877 | 0.033565 | 0.072828 |
| HRC        | 19q13.33 | -0.10877 | 0.033569 | 0.07283  |
| ACSL5      | 10q25.2  | -0.10877 | 0.033575 | 0.072833 |
| KCNQ3      | 8q24.22  | -0.10876 | 0.033585 | 0.072841 |
| DCAF4L1    | 4p13     | 0.108759 | 0.033585 | 0.072841 |
| RSPH10B2   | 7p22.1   | 0.108705 | 0.033674 | 0.073025 |
| GAS5       | 1q25.1   | 0.108671 | 0.033729 | 0.073138 |
| FSHR       | 2p16.3   | -0.10865 | 0.033759 | 0.073194 |
| CCL26      | 7q11.23  | -0.10864 | 0.033782 | 0.073236 |
| FLJ37201   | 10q23.31 | 0.108636 | 0.033788 | 0.073241 |
| CDC42BPA   | 1q42.13  | 0.10863  | 0.033798 | 0.073253 |
| SMYD4      | 17p13.3  | 0.108628 | 0.033801 | 0.073253 |
| WNT16      | 7q31.31  | -0.10862 | 0.033816 | 0.073278 |
| TLR6       | 4p14     | -0.10859 | 0.033865 | 0.073376 |
| HULC       | 6p24.3   | -0.10858 | 0.033883 | 0.073407 |
| KIAA0319   | 6p22.3   | 0.108573 | 0.033891 | 0.073417 |
| PTK6       | 20q13.33 | 0.108561 | 0.033911 | 0.073451 |
| KDF1       | 1p36.11  | 0.10854  | 0.033946 | 0.073519 |
| MUC6       | 11p15.5  | 0.108502 | 0.034009 | 0.073647 |
| SAP130     | 2q14.3   | 0.108482 | 0.034042 | 0.073711 |
| NSMCE1     | 16p12.1  | -0.10847 | 0.034054 | 0.073728 |
| MIA3       | 1q41     | 0.108473 | 0.034057 | 0.073728 |
| NUTM2D     | 10q23.2  | -0.10845 | 0.034087 | 0.073785 |
| LPAR6      | 13q14.2  | -0.10844 | 0.034107 | 0.07382  |
| CALCOCO2   | 17q21.32 | -0.10844 | 0.034116 | 0.073832 |
| TMEM186    | 16p13.2  | 0.108393 | 0.03419  | 0.073983 |
| RABAC1     | 19q13.2  | -0.10839 | 0.034202 | 0.074001 |
| MMP19      | 12q13.2  | -0.10838 | 0.034218 | 0.074028 |
| B3GNT9     | 16q22.1  | -0.10837 | 0.034221 | 0.074028 |
| OR1G1      | 17p13.3  | 0.108346 | 0.034268 | 0.074121 |
| HSPA4L     | 4q28.1   | 0.108305 | 0.034336 | 0.074261 |
| ZNF565     | 19q13.12 | 0.108302 | 0.034343 | 0.074266 |
| DISP1      | 1q41     | -0.10827 | 0.034396 | 0.074373 |
| KIAA0753   | 17p13.1  | 0.10825  | 0.034429 | 0.074436 |
| ORAI2      | 7q22.1   | -0.10822 | 0.034487 | 0.074554 |
| RHOA       | 3p21.31  | -0.1082  | 0.034517 | 0.07461  |
| CEACAM6    | 19q13.2  | -0.1082  | 0.034521 | 0.074612 |
| GALNT9     | 12q24.33 | 0.108191 | 0.034527 | 0.074617 |
| RIMKLB     | 12p13.31 | -0.10817 | 0.034556 | 0.074667 |
| CIPC       | 14q24.3  | -0.10817 | 0.034558 | 0.074667 |
| ZRANB1     | 10q26.13 | -0.10817 | 0.034562 | 0.074667 |
| DCHS1      | 11p15.4  | -0.10815 | 0.034605 | 0.074753 |
| NSUN7      | 4p14     | 0.108126 | 0.034638 | 0.074815 |
| RNF208     | 9q34.3   | 0.108123 | 0.034642 | 0.074818 |
| ST6GALNAC6 | 9q34.11  | -0.1081  | 0.034684 | 0.074899 |
| STARD3     | 17q12    | -0.10809 | 0.034691 | 0.074907 |
| THOC6      | 16p13.3  | 0.108089 | 0.0347   | 0.074918 |
| PCBD2      | 5q31.1   | 0.10808  | 0.034715 | 0.074942 |

|           |                       |          |          |          |
|-----------|-----------------------|----------|----------|----------|
| MGAT4B    | 5q35.3                | 0.108068 | 0.034735 | 0.074969 |
| NEDD4L    | 18q21.31              | -0.10807 | 0.034737 | 0.074969 |
| CLCA2     | 1p22.3                | -0.10807 | 0.034739 | 0.074969 |
| SOX21     | 13q32.1               | -0.10805 | 0.034763 | 0.075012 |
| KDR       | 4q12                  | -0.10805 | 0.034771 | 0.075022 |
| RPL10     | Xq28                  | -0.10802 | 0.034811 | 0.0751   |
| GSTA1     | 6p12.2                | -0.10801 | 0.034837 | 0.075149 |
| NPSR1     | 7p14.3                | 0.108004 | 0.034843 | 0.075154 |
| SLC19A2   | 1q24.2                | 0.107985 | 0.034876 | 0.075217 |
| HES7      | 17p13.1               | 0.107974 | 0.034894 | 0.075248 |
| PGBD3     | 10q11.23              | -0.10797 | 0.034908 | 0.075269 |
| RIOK2     | 5q15                  | -0.10796 | 0.034923 | 0.075295 |
| TNFRSF17  | 16p13.13              | -0.10795 | 0.034929 | 0.075298 |
| STEAP1B   | 7p15.3                | -0.10795 | 0.034941 | 0.075317 |
| RAB28     | 4p15.33               | -0.10794 | 0.034958 | 0.075345 |
| NCOA1     | 2p23.3                | -0.10792 | 0.034979 | 0.075381 |
| TFAP2C    | 20q13.31              | -0.10789 | 0.035031 | 0.075477 |
| CCDC39    | 3q26.33               | 0.107892 | 0.035032 | 0.075477 |
| EOMES     | 3p24.1                | -0.10789 | 0.035034 | 0.075477 |
| NRN1L     | 16q22.1               | -0.10787 | 0.035062 | 0.075529 |
| SYNJ2BP   | 14q24.2               | -0.10787 | 0.035071 | 0.075539 |
| ZNF137P   | 19q13.41              | 0.107868 | 0.035074 | 0.075539 |
| FAT1      | 4q35.2                | 0.107854 | 0.035097 | 0.07558  |
| MBTPS2    | Xp22.12               | -0.10785 | 0.035101 | 0.07558  |
| TPM3P9    | 19q13.42              | 0.107836 | 0.035128 | 0.075631 |
| ADRB1     | 10q25.3               | -0.10781 | 0.035166 | 0.075703 |
| NTRK1     | 1q23.1                | -0.10781 | 0.035175 | 0.075716 |
| PPIB      | 15q22.31              | -0.1078  | 0.035185 | 0.075728 |
| TARSL2    | 15q26.3               | -0.1078  | 0.035196 | 0.075743 |
| CXCL10    | 4q21.1                | -0.10775 | 0.035276 | 0.075907 |
| PEX11G    | 19p13.2               | -0.10772 | 0.03532  | 0.075994 |
| TP53AIP1  | 11q24.3               | 0.107703 | 0.035355 | 0.076061 |
| TAMM41    | 3p25.2                | 0.10768  | 0.035396 | 0.076133 |
| LINC01011 | 6p25.2                | 0.10768  | 0.035396 | 0.076133 |
| ZC4H2     | Xq11.2                | -0.10766 | 0.035422 | 0.076182 |
| RLN1      | 9p24.1                | -0.10765 | 0.035445 | 0.076223 |
| NDUFAF1   | 15q15.1               | -0.10764 | 0.035458 | 0.076242 |
| UNC45A    | 15q26.1               | 0.107606 | 0.035522 | 0.076366 |
| TPGS2     | 18q12.2               | 0.107605 | 0.035523 | 0.076366 |
| CASQ1     | 1q23.2                | -0.1076  | 0.035536 | 0.076385 |
| IGIP      | 5q31.3                | -0.10759 | 0.035545 | 0.076396 |
| CCP110    | 16p12.3               | 0.107576 | 0.035574 | 0.076448 |
| KLHL31    | 6p12.1                | 0.107574 | 0.035577 | 0.076448 |
| BARX1     | 9q22.32               | -0.10757 | 0.035586 | 0.07646  |
| TIMM8A    | Xq22.1                | 0.107562 | 0.035597 | 0.076463 |
|           | 5-Mar 10q23.32-q23.33 | -0.10756 | 0.035598 | 0.076463 |
| IFT57     | 3q13.12-q13.13        | -0.10756 | 0.035599 | 0.076463 |
| ZNF775    | 7q36.1                | -0.10755 | 0.035611 | 0.07648  |
| CDKL1     | 14q21.3               | 0.107546 | 0.035626 | 0.076505 |
| DPY19L2P4 | 7q21.13               | -0.10753 | 0.035651 | 0.076549 |
| HLA-DOB   | 6p21.32               | -0.10752 | 0.035664 | 0.076568 |
| NRIP3     | 11p15.4               | -0.10752 | 0.035667 | 0.076568 |
| MLST8     | 16p13.3               | 0.107517 | 0.035676 | 0.076579 |
| MISP3     | 19p13.12              | 0.107499 | 0.035707 | 0.076637 |
| LYSMD1    | 1q21.3                | 0.107483 | 0.035735 | 0.076689 |
| IMPAD1    | 8q12.1                | -0.10746 | 0.035772 | 0.076755 |
| ASAP2     | 2p25.1 2p24           | 0.10746  | 0.035773 | 0.076755 |
| KCNG1     | 20q13.13              | -0.10744 | 0.035801 | 0.076805 |



|          |              |          |          |          |
|----------|--------------|----------|----------|----------|
| SLC39A4  | 8q24.3       | -0.10744 | 0.035813 | 0.076823 |
| MFSD12   | 19p13.3      | 0.107408 | 0.035863 | 0.076924 |
| TSPYL1   | 6q22.1       | -0.10739 | 0.035893 | 0.076979 |
| SLC44A1  | 9q31.1-q31.2 | -0.10739 | 0.035902 | 0.07699  |
| ZNF707   | 8q24.3       | 0.107381 | 0.035911 | 0.076994 |
| ZNF580   | 19q13.42     | 0.107381 | 0.035912 | 0.076994 |
| PIAS4    | 19p13.3      | 0.107373 | 0.035924 | 0.077013 |
| IQCF1    | 3p21.2       | 0.107353 | 0.035959 | 0.077079 |
| ANXA1    | 9q21.13      | -0.10733 | 0.035992 | 0.077141 |
| ZNF219   | 14q11.2      | 0.10733  | 0.035999 | 0.077141 |
| PLPPR2   | 19p13.2      | -0.10733 | 0.035999 | 0.077141 |
| RAB10    | 2p23.3       | -0.10732 | 0.036019 | 0.077168 |
| PCBP3    | 21q22.3      | -0.10732 | 0.036021 | 0.077168 |
| TTY6B    | Yq11.223     | 0.107316 | 0.036023 | 0.077168 |
| MEGF9    | 9q33.2       | -0.10731 | 0.036035 | 0.077184 |
| GSTT1    | 22q11.23     | -0.10731 | 0.036039 | 0.077185 |
| TMIGD2   | 19p13.3      | -0.10729 | 0.036066 | 0.077227 |
| TMEM14EP | 3q25.2       | 0.107292 | 0.036066 | 0.077227 |
| PCAT4    | 4q21.21      | -0.10725 | 0.03614  | 0.077376 |
| RIN3     | 14q32.12     | -0.10724 | 0.036157 | 0.077403 |
| SIGLEC14 | 19q13.41     | -0.10724 | 0.036163 | 0.077408 |
| PAK1IP1  | 6p24.2       | 0.107234 | 0.036166 | 0.077408 |
| FAM92B   | 16q24.1      | -0.10723 | 0.036182 | 0.077434 |
| CSE1L    | 20q13.13     | 0.107202 | 0.036222 | 0.077511 |
| SYT12    | 11q13.2      | -0.10718 | 0.036255 | 0.077573 |
| WRAP53   | 17p13.1      | 0.107161 | 0.036295 | 0.077649 |
| MYBPC3   | 11p11.2      | 0.107157 | 0.036301 | 0.077649 |
| NUDT17   | 1q21.1       | 0.107157 | 0.036302 | 0.077649 |
| NEBL     | 10p12.31     | -0.10715 | 0.036311 | 0.077659 |
| SPIB     | 19q13.33     | -0.10709 | 0.036418 | 0.07788  |
| GALNT1   | 18q12.2      | -0.10706 | 0.036477 | 0.077997 |
| METTL21C | 13q33.1      | -0.10704 | 0.036499 | 0.078029 |
| ZNF19    | 16q22.2      | -0.10704 | 0.0365   | 0.078029 |
| ZNF630   | Xp11.23      | -0.10704 | 0.036513 | 0.078041 |
| KLHL6    | 3q27.1       | -0.10703 | 0.036517 | 0.078041 |
| CHD6     | 20q12        | -0.10703 | 0.036517 | 0.078041 |
| FAM118B  | 11q24.2      | -0.10702 | 0.036542 | 0.078086 |
| FAAH     | 1p33         | 0.107012 | 0.036557 | 0.078111 |
| CEP19    | 3q29         | -0.10701 | 0.036568 | 0.078125 |
| HSPA2    | 14q23.3      | -0.10698 | 0.03661  | 0.078207 |
| TRIAP1   | 12q24.31     | -0.10695 | 0.036672 | 0.078323 |
| CFAP221  | 2q14.2       | -0.10695 | 0.036674 | 0.078323 |
| GALNT5   | 2q24.1       | 0.106944 | 0.036676 | 0.078323 |
| SH3TC1   | 4p16.1       | -0.1069  | 0.036754 | 0.078481 |
| MYO9B    | 19p13.11     | 0.106891 | 0.03677  | 0.078508 |
| CDH8     | 16q21        | -0.10689 | 0.036776 | 0.078511 |
| SMIM3    | 5q33.1       | -0.10688 | 0.036784 | 0.078519 |
| CA10     | 17q21.33-q22 | -0.10687 | 0.036814 | 0.078576 |
| HS6ST3   | 13q32.1      | -0.10684 | 0.036855 | 0.078656 |
| OR4N2    | 14q11.2      | -0.10684 | 0.03686  | 0.078657 |
| FABP5    | 8q21.13      | 0.106832 | 0.036875 | 0.078675 |
| OTOAP1   | 16p12.2      | -0.10683 | 0.036876 | 0.078675 |
| RHCG     | 15q26.1      | -0.1068  | 0.036926 | 0.078772 |
| FNDC8    | 17q12        | 0.106783 | 0.036962 | 0.078841 |
| NAMPT    | 7q22.3       | -0.10677 | 0.036985 | 0.078874 |
| DBT      | 1p21.2       | -0.10677 | 0.036986 | 0.078874 |
| CEACAM19 | 19q13.31     | 0.106768 | 0.036989 | 0.078874 |
| CARD19   | 9q22.31      | 0.106764 | 0.036996 | 0.07888  |

|           |          |          |          |          |
|-----------|----------|----------|----------|----------|
| ZNF322P1  | 9q22.33  | -0.10676 | 0.037004 | 0.078888 |
| TFAMP1    | 7p22.3   | 0.106757 | 0.037009 | 0.078891 |
| COQ9      | 16q21    | 0.106754 | 0.037014 | 0.078892 |
| ASS1      | 9q34.11  | 0.10675  | 0.037021 | 0.078899 |
| ACVR1B    | 12q13.13 | -0.10674 | 0.037031 | 0.078912 |
| RHOD      | 11q13.2  | -0.10674 | 0.037036 | 0.078915 |
| C1ORF100  | 1q44     | 0.106699 | 0.037112 | 0.079068 |
| BARHL1    | 9q34.13  | 0.106693 | 0.037122 | 0.079081 |
| SBDS      | 7q11.21  | -0.10669 | 0.037135 | 0.079092 |
| TH        | 11p15.5  | -0.10669 | 0.037135 | 0.079092 |
| SLC34A1   | 5q35.3   | 0.106672 | 0.037159 | 0.079135 |
| CLEC4C    | 12p13.31 | -0.10667 | 0.037166 | 0.079142 |
| FBXW11    | 5q35.1   | -0.10666 | 0.037173 | 0.079147 |
| FAM167B   | 1p35.2   | -0.10666 | 0.037179 | 0.079151 |
| STRBP     | 9q33.3   | 0.106658 | 0.037184 | 0.079155 |
| HYDIN     | 16q22.2  | -0.10663 | 0.037226 | 0.079236 |
| TEX30     | 13q33.1  | 0.106604 | 0.037282 | 0.079346 |
| CEACAM20  | 19q13.31 | 0.1066   | 0.037288 | 0.079351 |
| FBXO44    | 1p36.22  | -0.1066  | 0.037296 | 0.079359 |
| PRPH      | 12q13.12 | -0.10658 | 0.037324 | 0.079411 |
| CASC1     | 12p12.1  | -0.10657 | 0.037336 | 0.079428 |
| VMO1      | 17p13.2  | -0.10656 | 0.037354 | 0.079456 |
| SERP1     | 3q25.1   | -0.10653 | 0.037407 | 0.07956  |
| STT3B     | 3p23     | -0.10651 | 0.037454 | 0.079652 |
| C6ORF226  | 6p21.1   | -0.10648 | 0.037504 | 0.07975  |
| CENPV     | 17p11.2  | 0.106472 | 0.037518 | 0.079772 |
| RND3      | 2q23.3   | -0.10647 | 0.037525 | 0.079778 |
| PSEN1     | 14q24.2  | -0.10646 | 0.03754  | 0.079802 |
| PPP2R5A   | 1q32.3   | 0.106453 | 0.037553 | 0.079821 |
| PART1     | 5q12.1   | -0.10642 | 0.037614 | 0.079941 |
| ZNF710    | 15q26.1  | 0.106409 | 0.037632 | 0.079972 |
| ZNF502    | 3p21.31  | -0.10641 | 0.037639 | 0.079979 |
| SEH1L     | 18p11.21 | 0.106402 | 0.037645 | 0.079982 |
| MAP4K2    | 11q13.1  | -0.1064  | 0.03765  | 0.079984 |
| GALM      | 2p22.1   | 0.106397 | 0.037654 | 0.079985 |
| ZNF248    | 10p11.21 | 0.10638  | 0.037684 | 0.080041 |
| SYCE3     | 22q13.33 | -0.10638 | 0.037691 | 0.080045 |
| SLC30A1   | 1q32.3   | -0.10637 | 0.037707 | 0.080073 |
| RASSF10   | 11p15.3  | -0.10635 | 0.037743 | 0.08014  |
| SEC22A    | 3q21.1   | -0.10631 | 0.037814 | 0.080282 |
| CRIP3     | 6p21.1   | 0.106293 | 0.037843 | 0.080335 |
| AP3B2     | 15q25.2  | -0.10627 | 0.037876 | 0.080388 |
| GARNL3    | 9q33.3   | 0.106275 | 0.037876 | 0.080388 |
| CDK2AP2   | 11q13.2  | 0.106271 | 0.037883 | 0.080395 |
| MEX3C     | 18q21.2  | -0.10623 | 0.037952 | 0.080532 |
| LINC00638 | 14q32.33 | -0.10622 | 0.037983 | 0.080589 |
| CDRT4     | 17p12    | -0.10621 | 0.03799  | 0.080597 |
| ZC3H12D   | 6q25.1   | 0.106191 | 0.038029 | 0.08067  |
| STK10     | 5q35.1   | -0.10617 | 0.038065 | 0.080731 |
| TEX19     | 17q25.3  | 0.106169 | 0.038069 | 0.080731 |
| TIGD3     | 11q13.1  | 0.106168 | 0.03807  | 0.080731 |
| PCDHA13   | 5q31.3   | -0.10614 | 0.038122 | 0.080833 |
| DBNDD1    | 16q24.3  | 0.106134 | 0.038132 | 0.080845 |
| RPL19P12  | 7q22.1   | -0.10613 | 0.038138 | 0.080849 |
| SLC2A11   | 22q11.23 | -0.10613 | 0.038149 | 0.080864 |
| TECPR1    | 7q21.3   | 0.106068 | 0.038253 | 0.081075 |
| SIDT2     | 11q23.3  | -0.10606 | 0.038259 | 0.081075 |
| HSP90AB1  | 6p21.1   | 0.106064 | 0.03826  | 0.081075 |

|           |                |          |          |          |
|-----------|----------------|----------|----------|----------|
| CNTD1     | 17q21.2-q21.31 | 0.10604  | 0.038304 | 0.081152 |
| DUSP8     | 11p15.5        | 0.10604  | 0.038305 | 0.081152 |
| TPSD1     | 16p13.3        | -0.10602 | 0.038336 | 0.08121  |
| R3HCC1    | 8p21.3         | -0.10596 | 0.038447 | 0.081435 |
| DDA1      | 19p13.11       | 0.105958 | 0.038456 | 0.08144  |
| M1AP      | 2p13.1         | -0.10596 | 0.038457 | 0.08144  |
| GPR150    | 5q15           | 0.105915 | 0.038534 | 0.081595 |
| SULT1C3   | 2q12.3         | 0.105904 | 0.038554 | 0.081629 |
| TMCC2     | 1q32.1         | -0.10588 | 0.038594 | 0.081705 |
| CELP      | 9q34.13        | -0.10587 | 0.038611 | 0.081731 |
| CALCA     | 11p15.2        | -0.10585 | 0.03865  | 0.081805 |
| CYP4F35P  | 18p11.21       | 0.105847 | 0.03866  | 0.081806 |
| ELF3      | 1q32.1         | 0.105846 | 0.038661 | 0.081806 |
| DCAF12L1  | Xq25           | -0.10585 | 0.038662 | 0.081806 |
| NEK11     | 3q22.1         | -0.10584 | 0.03868  | 0.081835 |
| LPL       | 8p21.3         | -0.10582 | 0.038701 | 0.08187  |
| NPEPL1    | 20q13.32       | 0.105813 | 0.038722 | 0.081902 |
| SNORA9    | 7p13           | 0.105811 | 0.038727 | 0.081902 |
| AMER2     | 13q12.13       | -0.10581 | 0.038728 | 0.081902 |
| RPS3      | 11q13.4        | -0.1058  | 0.038749 | 0.081937 |
| MRPL10    | 17q21.32       | -0.10579 | 0.038772 | 0.081969 |
| PRPF40B   | 12q13.12       | 0.105786 | 0.038772 | 0.081969 |
| LINC00938 | 12q12          | -0.10577 | 0.038801 | 0.082021 |
| FOXD4L3   | 9q21.11        | 0.105755 | 0.03883  | 0.082073 |
| DNAJC6    | 1p31.3         | -0.10575 | 0.03884  | 0.082086 |
| C8ORF82   | 8q24.3         | -0.10574 | 0.03886  | 0.082118 |
| SLC52A1   | 17p13.2        | -0.10574 | 0.038866 | 0.082118 |
| HOXC8     | 12q13.13       | -0.10573 | 0.038867 | 0.082118 |
| CCDC38    | 12q23.1        | 0.105724 | 0.038887 | 0.082151 |
| CWC22     | 2q31.3         | -0.10571 | 0.038908 | 0.082187 |
| LENG9     | 19q13.42       | 0.105683 | 0.038964 | 0.082296 |
| SLC26A11  | 17q25.3        | -0.10568 | 0.038968 | 0.082296 |
| PIGU      | 20q11.22       | -0.10567 | 0.038997 | 0.082348 |
| SYN2      | 3p25.2         | -0.10561 | 0.039105 | 0.082569 |
| RNF141    | 11p15.4 11p15  | -0.1056  | 0.03911  | 0.082569 |
| KIAA0513  | 16q24.1        | -0.1056  | 0.039115 | 0.082572 |
| LRIG2     | 1p13.2         | 0.105593 | 0.039132 | 0.082599 |
| TAF11     | 6p21.31        | 0.105578 | 0.03916  | 0.08265  |
| TCIM      | 8p11.21        | -0.10557 | 0.039171 | 0.082654 |
| VASH1     | 14q24.3        | -0.10557 | 0.039174 | 0.082654 |
| SNAI3-AS1 | 16q24.2        | 0.10557  | 0.039174 | 0.082654 |
| C18ORF54  | 18q21.2        | 0.105565 | 0.039183 | 0.082663 |
| MAN2C1    | 15q24.2        | 0.105559 | 0.039194 | 0.082678 |
| ZNF703    | 8p11.23        | 0.105545 | 0.039222 | 0.082727 |
| FCHO1     | 19p13.11       | 0.105537 | 0.039235 | 0.082747 |
| RRS1      | 8q13.1         | 0.105499 | 0.039307 | 0.08289  |
| SDHA      | 5p15.33        | 0.105495 | 0.039314 | 0.082896 |
| CCDC36    | 3p21.31        | -0.10545 | 0.039392 | 0.083052 |
| TGFBR3    | 1p22.1         | -0.10544 | 0.039419 | 0.083094 |
| SART1     | 11q13.1        | 0.105438 | 0.039421 | 0.083094 |
| TEAD1     | 11p15.3        | -0.10544 | 0.039427 | 0.083098 |
| PSMD3     | 17q21.1        | 0.105416 | 0.039462 | 0.083165 |
| SERPINA1  | 14q32.13       | -0.10538 | 0.039528 | 0.083289 |
| CDC42EP5  | 19q13.42       | 0.105381 | 0.03953  | 0.083289 |
| MAF1      | 8q24.3         | -0.10537 | 0.039546 | 0.083314 |
| GNL3      | 3p21.1         | 0.105355 | 0.039577 | 0.083371 |
| ARHGEF10  | 8p23.3         | 0.105343 | 0.039601 | 0.083412 |
| RILPL2    | 12q24.31       | -0.10533 | 0.039618 | 0.083434 |

|                    |          |          |          |          |
|--------------------|----------|----------|----------|----------|
| C2ORF70            | 2p23.3   | 0.105333 | 0.039619 | 0.083434 |
| COL11A2            | 6p21.32  | 0.10532  | 0.039643 | 0.083476 |
| SLC37A4            | 11q23.3  | 0.105305 | 0.039673 | 0.083528 |
| MEPCE              | 7q22.1   | 0.105303 | 0.039676 | 0.083528 |
| CHCHD10            | 22q11.23 | 0.105295 | 0.039692 | 0.083551 |
| FAM155B            | Xq13.1   | -0.10529 | 0.039701 | 0.08356  |
| PTGER4P2-CDK2AP2P2 | 9q13     | -0.10529 | 0.039704 | 0.08356  |
| CEP170             | 1q43     | -0.10527 | 0.039747 | 0.083641 |
| SEC63              | 6q21     | -0.10525 | 0.039767 | 0.083675 |
| NPPA               | 1p36.22  | 0.105233 | 0.039809 | 0.083755 |
| TLL11              | 9q33.2   | 0.105215 | 0.039843 | 0.083817 |
| MRM1               | 17q12    | 0.105206 | 0.03986  | 0.083845 |
| HMGA2              | 12q14.3  | 0.105198 | 0.039875 | 0.083866 |
| PRR5               | 22q13.31 | 0.105187 | 0.039896 | 0.083901 |
| RPL34              | 4q25     | -0.10518 | 0.039904 | 0.083909 |
| MAGEA10            | Xq28     | -0.10518 | 0.039909 | 0.083911 |
| ZNF616             | 19q13.41 | -0.10518 | 0.039916 | 0.083918 |
| FGFBP2             | 4p15.32  | -0.10516 | 0.039949 | 0.083978 |
| TEX26              | 13q12.3  | -0.10515 | 0.039971 | 0.084016 |
| POMT1              | 9q34.13  | 0.105137 | 0.03999  | 0.084047 |
| TRPC4              | 13q13.3  | -0.10513 | 0.040011 | 0.084081 |
| EFHC2              | Xp11.3   | -0.10511 | 0.040042 | 0.084139 |
| FLG                | 1q21.3   | -0.1051  | 0.040069 | 0.084186 |
| DPH3P1             | 20q13.33 | 0.105079 | 0.040101 | 0.084244 |
| TNFRSF13C          | 22q13.2  | 0.105076 | 0.040107 | 0.084249 |
| ADGRL3             | 4q13.1   | -0.10506 | 0.040136 | 0.084301 |
| PRR18              | 6q27     | 0.105045 | 0.040167 | 0.084356 |
| PHC1               | 12p13.31 | -0.10501 | 0.040229 | 0.084478 |
| ARHGAP4            | Xq28     | 0.104998 | 0.040256 | 0.084526 |
| FGR                | 1p35.3   | -0.10492 | 0.04041  | 0.08483  |
| OVOL2              | 20p11.23 | 0.104917 | 0.040411 | 0.08483  |
| SERPINA9           | 14q32.13 | -0.10492 | 0.040414 | 0.08483  |
| ZNF549             | 19q13.43 | -0.10491 | 0.040426 | 0.084846 |
| TM7SF3             | 12p11.23 | -0.10491 | 0.040434 | 0.084853 |
| WDR86              | 7q36.1   | -0.1049  | 0.040437 | 0.084853 |
| MYL12B             | 18p11.31 | -0.10489 | 0.040462 | 0.084897 |
| DAP                | 5p15.2   | -0.10489 | 0.040469 | 0.084903 |
| ETNPPL             | 4q25     | -0.10487 | 0.040504 | 0.084967 |
| SH3GL2             | 9p22.2   | -0.10486 | 0.040522 | 0.084995 |
| BCL6               | 3q27.3   | -0.10486 | 0.04053  | 0.085003 |
| PCNX4              | 14q23.1  | -0.10485 | 0.040546 | 0.085027 |
| SLC26A8            | 6p21.31  | 0.104832 | 0.040574 | 0.085077 |
| FAN1               | 15q13.3  | 0.104827 | 0.040584 | 0.08509  |
| ATP5F1E            | 20q13.32 | -0.10481 | 0.040622 | 0.08516  |
| CASC2              | 10q26.11 | 0.104804 | 0.040628 | 0.085163 |
| OSGIN2             | 8q21.3   | -0.1048  | 0.040633 | 0.085164 |
| VRTN               | 14q24.3  | 0.1048   | 0.040636 | 0.085164 |
| OR9Q1              | 11q12.1  | 0.104796 | 0.040644 | 0.08517  |
| CYP7A1             | 8q12.1   | -0.10478 | 0.040678 | 0.085233 |
| MRGBP              | 20q13.33 | 0.104769 | 0.040696 | 0.085262 |
| MTTP               | 4q23     | -0.10475 | 0.040728 | 0.085316 |
| GCM1               | 6p12.1   | -0.10475 | 0.04073  | 0.085316 |
| PER1               | 17p13.1  | -0.10473 | 0.040767 | 0.085383 |
| TMED4              | 7p13     | -0.10471 | 0.040819 | 0.085484 |
| ZACN               | 17q25.1  | 0.10468  | 0.040867 | 0.085576 |
| TAF8               | 6p21.1   | 0.104644 | 0.040938 | 0.085715 |
| TPRG1L             | 1p36.32  | -0.10464 | 0.04095  | 0.085732 |
| OSBPL1A            | 18q11.2  | -0.10463 | 0.04096  | 0.085742 |

|             |              |          |          |          |
|-------------|--------------|----------|----------|----------|
| CEBPA-DT    | 19q13.11     | 0.104627 | 0.04097  | 0.085756 |
| HMGCLL1     | 6p12.1       | -0.10462 | 0.040977 | 0.08576  |
| PON2        | 7q21.3       | -0.10461 | 0.041002 | 0.085805 |
| ACAA1       | 3p22.2       | 0.104608 | 0.041007 | 0.085806 |
| ZNF740      | 12q13.13     | 0.104582 | 0.041058 | 0.085904 |
| AVPR1A      | 12q14.2      | -0.10456 | 0.041105 | 0.085993 |
| C3ORF52     | 3q13.2       | 0.104553 | 0.041114 | 0.086002 |
| SPATA9      | 5q15         | -0.10455 | 0.041124 | 0.086012 |
| DHDH        | 19q13.33     | 0.104547 | 0.041127 | 0.086012 |
| AMIGO1      | 1p13.3       | -0.10454 | 0.041146 | 0.086043 |
| RAB3GAP2    | 1q41         | 0.104494 | 0.041229 | 0.086208 |
| GJB3        | 1p34.3       | 0.104451 | 0.041314 | 0.086377 |
| INTS14      | 15q22.31     | -0.10444 | 0.041336 | 0.086412 |
| SLC5A12     | 11p14.2      | -0.10443 | 0.041364 | 0.086462 |
| MCCC1       | 3q27.1       | -0.10442 | 0.041371 | 0.086467 |
| COLGALT2    | 1q25.3       | -0.10442 | 0.041384 | 0.086486 |
| LAMA1       | 18p11.31     | -0.10437 | 0.041463 | 0.086642 |
| FSD1L       | 9q31.2       | -0.10437 | 0.041476 | 0.08666  |
| PRAP1       | 10q26.3      | -0.10433 | 0.041559 | 0.086826 |
| IPMK        | 10q21.1      | 0.104323 | 0.041564 | 0.086826 |
| AMY2A       | 1p21.1       | 0.104317 | 0.041576 | 0.086843 |
| STAP1       | 4q13.2       | -0.1043  | 0.04161  | 0.086904 |
| CCN6        | 6q21         | -0.10427 | 0.041671 | 0.087023 |
| PCDHB13     | 5q31.3       | -0.10426 | 0.041687 | 0.087047 |
| UHMK1       | 1q23.3       | 0.104253 | 0.041702 | 0.087069 |
| CRYZ        | 1p31.1       | -0.10424 | 0.041728 | 0.087115 |
| TBC1D8      | 2q11.2       | 0.104235 | 0.041738 | 0.087126 |
| HTR2C       | Xq23         | -0.10423 | 0.041747 | 0.087135 |
| TENM3-AS1   | 4q34.3       | -0.10423 | 0.041752 | 0.087137 |
| ARHGAP5-AS1 | 14q12        | -0.10422 | 0.041776 | 0.087177 |
| KRTAP10-2   | 21q22.3      | 0.104186 | 0.041834 | 0.08729  |
| KCNA2       | 1p13.3       | -0.10415 | 0.041899 | 0.087416 |
| KIRREL3     | 11q24.2      | -0.10415 | 0.041903 | 0.087416 |
| SEC14L5     | 16p13.3      | -0.10414 | 0.041933 | 0.087469 |
| AZIN1       | 8q22.3       | -0.10411 | 0.041977 | 0.087552 |
| SNHG28      | 1q23.2       | 0.104063 | 0.042078 | 0.087749 |
| COL9A2      | 1p34.2       | 0.104062 | 0.04208  | 0.087749 |
| WBP4        | 13q14.11     | -0.10406 | 0.042089 | 0.087759 |
| FRG1BP      | 20q11.1      | -0.10404 | 0.042125 | 0.087823 |
| PDRG1       | 20q11.21     | -0.10403 | 0.042138 | 0.087841 |
| ACTL6A      | 3q26.33      | 0.104004 | 0.042195 | 0.087943 |
| SLC12A9     | 7q22.1       | 0.104004 | 0.042195 | 0.087943 |
| TEX11       | Xq13.1       | -0.10398 | 0.042236 | 0.088019 |
| CACNB1      | 17q12        | 0.103978 | 0.042246 | 0.088028 |
| TBC1D10C    | 11q13.2      | -0.10398 | 0.042252 | 0.088028 |
| SLAMF6      | 1q23.2-q23.3 | -0.10397 | 0.042254 | 0.088028 |
| NDST1       | 5q33.1       | -0.10397 | 0.042267 | 0.088047 |
| CLEC18A     | 16q22.1      | 0.103936 | 0.04233  | 0.088165 |
| NQO1        | 16q22.1      | 0.103935 | 0.042333 | 0.088165 |
| TMEM181     | 6q25.3       | 0.103927 | 0.042348 | 0.088188 |
| BMP8A       | 1p34.3       | -0.10392 | 0.042362 | 0.088208 |
| ZNF177      | 19p13.2      | -0.10391 | 0.042392 | 0.088262 |
| E2F5        | 8q21.2       | -0.10388 | 0.042443 | 0.088352 |
| HRH2        | 5q35.2       | -0.10388 | 0.042445 | 0.088352 |
| ZZEF1       | 17p13.2      | 0.10387  | 0.042462 | 0.08838  |
| CNDP1       | 18q22.3      | 0.103865 | 0.042472 | 0.08839  |
| LINC00592   | 12q13.13     | -0.10385 | 0.042505 | 0.088447 |
| STAB2       | 12q23.3      | -0.10385 | 0.04251  | 0.088447 |

|           |                 |          |          |          |
|-----------|-----------------|----------|----------|----------|
| FKBP1AP1  | 19q13.43        | -0.10385 | 0.042512 | 0.088447 |
| DVL2      | 17p13.1         | -0.10382 | 0.042568 | 0.088554 |
| TMEM155   | 4q27            | -0.10379 | 0.042619 | 0.088652 |
| ATF1      | 12q13.12        | -0.10378 | 0.042643 | 0.088692 |
| PSMD11    | 17q11.2         | 0.103747 | 0.042709 | 0.088819 |
| LSM12     | 17q21.31        | 0.103722 | 0.042759 | 0.088914 |
| TIFAB     | 5q31.1          | -0.10372 | 0.042772 | 0.088933 |
| BAP1      | 3p21.1          | 0.103698 | 0.042808 | 0.088993 |
| VAPA      | 18p11.22        | -0.1037  | 0.04281  | 0.088993 |
| CAMK2N1   | 1p36.12         | -0.10369 | 0.042817 | 0.088994 |
| SDHC      | 1q23.3          | 0.103692 | 0.042821 | 0.088994 |
| CPLANE2   | 1p36.13         | 0.10369  | 0.042824 | 0.088994 |
| TBX19     | 1q24.2          | 0.10368  | 0.042843 | 0.089025 |
| MYO1B     | 2q32.3          | -0.10368 | 0.042851 | 0.089031 |
| CPNE1     | 20q11.22        | -0.10367 | 0.042866 | 0.089054 |
| ATP5F1B   | 12q13.3         | 0.10366  | 0.042885 | 0.089084 |
| ARPP19    | 15q21.2         | -0.10366 | 0.042892 | 0.089087 |
| COL7A1    | 3p21.31         | 0.103655 | 0.042895 | 0.089087 |
| ASIC1     | 12q13.12        | 0.103642 | 0.042921 | 0.089125 |
| LINC00643 | 14q23.2         | -0.10364 | 0.042923 | 0.089125 |
| SWAP70    | 11p15.4         | -0.10362 | 0.042964 | 0.089202 |
| IQCF5     | 3p21.2          | 0.103595 | 0.043016 | 0.089301 |
| OVGP1     | 1p13.2          | -0.10359 | 0.043028 | 0.089315 |
| S100A8    | 1q21.3          | -0.10359 | 0.043032 | 0.089316 |
| EDN3      | 20q13.32        | -0.10358 | 0.043047 | 0.089336 |
| RGP1      | 9p13.3          | 0.103573 | 0.04306  | 0.089355 |
| SLC22A18  | 11p15.4         | 0.10357  | 0.043066 | 0.089357 |
| PIK3R5    | 17p13.1         | -0.10357 | 0.043076 | 0.08937  |
| SFTPB     | 2p11.2          | -0.10355 | 0.043101 | 0.089412 |
| BEAN1     | 16q21           | -0.10354 | 0.043121 | 0.089439 |
| MESD      | 15q25.1         | -0.10354 | 0.043123 | 0.089439 |
| TTC19     | 17p12           | -0.10353 | 0.043149 | 0.089483 |
| RASSF5    | 1q32.1          | -0.10353 | 0.043154 | 0.089483 |
| C12ORF4   | 12p13.32        | -0.10352 | 0.043162 | 0.089483 |
| NDUFS8    | 11q13.2         | 0.103523 | 0.043162 | 0.089483 |
| SRMS      | 20q13.33        | 0.103509 | 0.04319  | 0.089532 |
| OTP       | 5q14.1          | 0.103498 | 0.043213 | 0.08957  |
| SNORA11   | Xp11.21         | 0.103474 | 0.043261 | 0.08966  |
| RBM18     | 9q33.2          | -0.10346 | 0.04328  | 0.089687 |
| STK3      | 8q22.2          | -0.10346 | 0.043283 | 0.089687 |
| DDX24     | 14q32.12        | -0.10345 | 0.043313 | 0.08974  |
| PDCD5     | 19q13.11        | 0.103443 | 0.043324 | 0.089754 |
| IGSF9B    | 11q25           | 0.103437 | 0.043336 | 0.089769 |
| HLA-E     | 6p22.1          | -0.10337 | 0.043473 | 0.090043 |
| HTR1B     | 6q14.1          | -0.10337 | 0.043477 | 0.090043 |
| EFCAB6    | 22q13.2-q13.31  | -0.10336 | 0.0435   | 0.090081 |
| HOXC4     | 12q13.13        | -0.10334 | 0.043529 | 0.090133 |
| CIDEA     | 18p11.21 18     | -0.1033  | 0.043617 | 0.090296 |
| SELPLG    | 12q24.11        | -0.1033  | 0.043617 | 0.090296 |
| SLC25A14  | Xq26.1          | 0.103287 | 0.043641 | 0.090331 |
| ZBTB40    | 1p36.12         | 0.103287 | 0.043643 | 0.090331 |
| NT5C2     | 10q24.32-q24.33 | 0.10328  | 0.043657 | 0.090351 |
| GNL3L     | Xp11.22         | 0.103266 | 0.043685 | 0.090398 |
| DEFB1     | 8p23.1          | -0.10325 | 0.043725 | 0.090472 |
| RASSF3    | 12q14.2         | 0.103215 | 0.04379  | 0.090588 |
| PIANP     | 12p13.31        | -0.10321 | 0.04379  | 0.090588 |
| ARHGEF10L | 1p36.13         | 0.103211 | 0.043799 | 0.090596 |
| FXN       | 9q21.11         | 0.103197 | 0.043827 | 0.090646 |

|             |                |          |          |          |
|-------------|----------------|----------|----------|----------|
| NUGGC       | 8p21.1         | -0.10319 | 0.04384  | 0.090662 |
| RBM39       | 20q11.22       | 0.103176 | 0.043871 | 0.090718 |
| PROKR1      | 2p13.3         | -0.10317 | 0.043885 | 0.090739 |
| EXOC1       | 4q12           | -0.10316 | 0.043894 | 0.090743 |
| PKD1L1      | 7p12.3         | -0.10316 | 0.043897 | 0.090743 |
| MYB         | 6q23.3         | 0.103123 | 0.043979 | 0.090904 |
| IER5L       | 9q34.11        | 0.103121 | 0.043984 | 0.090904 |
| RNF151      | 16p13.3        | 0.103108 | 0.044009 | 0.090948 |
| CCL23       | 17q12          | -0.1031  | 0.044027 | 0.090975 |
| PHACTR2-AS1 | 6q24.2         | 0.103078 | 0.044072 | 0.091058 |
| IFITM2      | 11p15.5        | -0.10307 | 0.044095 | 0.091091 |
| AADACP1     | 3q25.1         | -0.10306 | 0.0441   | 0.091091 |
| TRAPPC2B    | 19q13.43       | -0.10306 | 0.044101 | 0.091091 |
| BRIX1       | 5p13.2         | 0.103061 | 0.044107 | 0.091093 |
| P3H2        | 3q28           | -0.10306 | 0.044112 | 0.091093 |
| AMY2B       | 1p21.1         | 0.103052 | 0.044126 | 0.091114 |
| ADAM18      | 8p11.22        | -0.10305 | 0.044132 | 0.091116 |
| ELOVL3      | 10q24.32       | -0.10304 | 0.044148 | 0.091141 |
| RPS26       | 12q13.2        | 0.102969 | 0.044298 | 0.091441 |
| AMZ1        | 7p22.3         | -0.10297 | 0.044304 | 0.091444 |
| MORC1       | 3q13.13        | -0.10295 | 0.044332 | 0.091491 |
| CBLN1       | 16q12.1        | -0.10292 | 0.044396 | 0.091614 |
| SIGLEC11    | 19q13.33       | -0.10286 | 0.044532 | 0.091885 |
| CRYL1       | 13q12.11       | -0.10282 | 0.044609 | 0.092035 |
| ZMPSTE24    | 1p34.2         | -0.10281 | 0.044634 | 0.092077 |
| LRRC26      | 9q34.3         | 0.102798 | 0.044654 | 0.092109 |
| TUBB7P      | 4q35.2         | 0.102792 | 0.044666 | 0.092125 |
| IP6K3       | 6p21.31        | -0.10278 | 0.044695 | 0.092175 |
| PRDM1       | 6q21           | -0.10277 | 0.044709 | 0.092194 |
| VRK3        | 19q13.33       | 0.102757 | 0.044738 | 0.092244 |
| STK26       | Xq26.2         | 0.102736 | 0.044783 | 0.092327 |
| ADIRF       | 10q23.2        | 0.102733 | 0.044788 | 0.092329 |
| GPATCH1     | 19q13.11       | 0.102727 | 0.044801 | 0.092346 |
| HMGB1       | 13q12.3        | 0.102718 | 0.044821 | 0.092377 |
| NKG7        | 19q13.41       | -0.1027  | 0.04485  | 0.092428 |
| PROM1       | 4p15.32        | -0.1027  | 0.044868 | 0.092455 |
| NTN3        | 16p13.3        | 0.102682 | 0.044895 | 0.092492 |
| TPBG        | 6q14.1         | -0.10268 | 0.044895 | 0.092492 |
| GOLIM4      | 3q26.2         | -0.10268 | 0.044904 | 0.092501 |
| CYP19A1     | 15q21.2        | -0.10263 | 0.044999 | 0.092677 |
| CNGB1       | 16q21          | -0.10263 | 0.045001 | 0.092677 |
| APEH        | 3p21.31        | 0.102631 | 0.045004 | 0.092677 |
| ITIH1       | 3p21.1         | -0.10262 | 0.045023 | 0.092708 |
| ESRRA       | 11q13.1        | 0.102592 | 0.045084 | 0.092824 |
| OTULIN      | 5p15.2         | 0.102583 | 0.045103 | 0.092854 |
| MASP2       | 1p36.22        | 0.10255  | 0.045174 | 0.09299  |
| TYW5        | 2q33.1         | -0.10252 | 0.045244 | 0.093125 |
| UBE2N       | 12q22          | 0.102507 | 0.045264 | 0.093156 |
| SLC25A2     | 5q31.3         | 0.102499 | 0.045281 | 0.093165 |
| IGLL3P      | 22q11.23       | 0.102499 | 0.045281 | 0.093165 |
| ANKRD20A8P  | 2q11.1         | 0.102498 | 0.045282 | 0.093165 |
| PIK3R6      | 17p13.1        | -0.10248 | 0.04533  | 0.093253 |
| CCDC141     | 2q31.2         | -0.10242 | 0.045452 | 0.093494 |
| PXDNL       | 8q11.22-q11.23 | -0.10241 | 0.04546  | 0.0935   |
| WDR6        | 3p21.31        | 0.102411 | 0.045468 | 0.0935   |
| LINC00626   | 1q24.2         | -0.10241 | 0.045469 | 0.0935   |
| XYLT1       | 16p12.3        | -0.1024  | 0.045484 | 0.093514 |
| SPHK1       | 17q25.1        | -0.1024  | 0.045485 | 0.093514 |

|              |                     |          |          |          |
|--------------|---------------------|----------|----------|----------|
| ZFAS1        | 20q13.13            | -0.10239 | 0.045504 | 0.093544 |
| MUC2         | 11p15.5             | 0.102379 | 0.045535 | 0.093598 |
| MIR1-1HG-AS1 | 20q13.33            | -0.10237 | 0.045562 | 0.093644 |
| PITHD1       | 1p36.11             | 0.102362 | 0.045572 | 0.093655 |
| DCUN1D3      | 16p12.3             | -0.10235 | 0.045591 | 0.093684 |
| STK33        | 11p15.4             | -0.10235 | 0.045596 | 0.093685 |
| KDM7A-DT     | 7q34                | -0.10234 | 0.045616 | 0.093718 |
| AASS         | 7q31.32             | -0.10231 | 0.045674 | 0.093827 |
| PDE9A        | 21q22.3             | -0.10231 | 0.045683 | 0.093835 |
| SOCS3        | 17q25.3             | -0.10231 | 0.045691 | 0.093843 |
| TCEA1        | 8q11.23             | -0.10229 | 0.045731 | 0.093915 |
| USHBP1       | 19p13.11            | -0.10228 | 0.04574  | 0.093922 |
| CDH12        | 5p14.3              | 0.102273 | 0.045761 | 0.093941 |
| CACNA1B      | 9q34.3              | -0.10227 | 0.045762 | 0.093941 |
| SLC26A3      | 7q22.3-q31.1        | -0.10227 | 0.045762 | 0.093941 |
| WFDC10A      | 20q13.12            | -0.10227 | 0.045775 | 0.093955 |
| MEGF10       | 5q23.2              | -0.10226 | 0.045779 | 0.093955 |
| GOLGA6B      | 15q24.1             | 0.102255 | 0.045798 | 0.093984 |
| TTC31        | 2p13.1              | 0.102248 | 0.045813 | 0.094006 |
| LAMTOR5      | 1p13.3              | -0.10224 | 0.045824 | 0.094019 |
| DTX2         | 7q11.23             | 0.102218 | 0.045877 | 0.094117 |
| SORT1        | 1p13.3 1p21.3-p13.1 | -0.10221 | 0.045903 | 0.094158 |
| SBF2         | 11p15.4             | -0.1022  | 0.045906 | 0.094158 |
| AKR1E2       | 10p15.1             | 0.102189 | 0.04594  | 0.094218 |
| SLC7A10      | 19q13.11            | -0.10218 | 0.045952 | 0.094233 |
| SLC45A3      | 1q32.1              | 0.102149 | 0.046025 | 0.094372 |
| OR5H6        | 3q11.2              | 0.102141 | 0.046042 | 0.094399 |
| F7           | 13q34               | -0.10212 | 0.046084 | 0.094475 |
| KIAA1614     | 1q25.3              | -0.10211 | 0.046113 | 0.094525 |
| DNAL1        | 14q24.3             | -0.1021  | 0.046127 | 0.094543 |
| POU2F2       | 19q13.2             | -0.10209 | 0.046158 | 0.094597 |
| PDE8B        | 5q13.3              | -0.10208 | 0.046168 | 0.094609 |
| DNMT3A       | 2p23.3              | -0.10207 | 0.046188 | 0.09464  |
| ZFP14        | 19q13.12            | -0.10207 | 0.046194 | 0.094642 |
| GUK1         | 1q42.13             | 0.102041 | 0.046258 | 0.094763 |
| PGLYRP1      | 19q13.32            | 0.102033 | 0.046273 | 0.094785 |
| RLN2         | 9p24.1              | -0.10203 | 0.046287 | 0.094803 |
| H6PD         | 1p36.22             | -0.10202 | 0.046304 | 0.094829 |
| SIKE1        | 1p13.2              | -0.10201 | 0.046324 | 0.094851 |
| SIAE         | 11q24.2             | 0.10201  | 0.046324 | 0.094851 |
| MAP7D3       | Xq26.3              | -0.10201 | 0.046329 | 0.094851 |
| KCNN4        | 19q13.31            | 0.101996 | 0.046355 | 0.094893 |
| RSAD2        | 2p25.2              | -0.10199 | 0.046375 | 0.094925 |
| SERPINB10    | 18q22.1             | -0.10198 | 0.046383 | 0.094932 |
| CCT6P1       | 7q11.21             | 0.101977 | 0.046394 | 0.094946 |
| GRINA        | 8q24.3              | -0.10196 | 0.04644  | 0.095029 |
| OR9G4        | 11q12.1             | 0.101934 | 0.046487 | 0.095115 |
| TMED3        | 15q25.1             | -0.1019  | 0.046551 | 0.095237 |
| STX2         | 12q24.33            | 0.101901 | 0.046558 | 0.095243 |
| CLNS1A       | 11q14.1             | -0.10188 | 0.046605 | 0.095328 |
| SOSTDC1      | 7p21.2              | -0.10187 | 0.046625 | 0.095346 |
| DPPA4        | 3q13.13             | -0.10187 | 0.046625 | 0.095346 |
| ZNF252P-AS1  | 8q24.3              | 0.101869 | 0.046628 | 0.095346 |
| GLRX3        | 10q26.3             | 0.101851 | 0.046667 | 0.095417 |
| UNC5A        | 5q35.2              | -0.10183 | 0.046713 | 0.0955   |
| TRAF3        | 14q32.32            | 0.101823 | 0.046728 | 0.095521 |
| APH1A        | 1q21.2              | 0.101797 | 0.046785 | 0.095627 |
| PLPPR5       | 1p21.3              | -0.10179 | 0.046802 | 0.095651 |



|            |               |          |          |          |
|------------|---------------|----------|----------|----------|
| FLT4       | 5q35.3        | -0.10179 | 0.046806 | 0.095651 |
| DLGAP2     | 8p23.3        | -0.10177 | 0.046844 | 0.09572  |
| ANKS4B     | 16p12.2       | 0.101765 | 0.046853 | 0.095728 |
| NKX2-6     | 8p21.2        | -0.10176 | 0.046863 | 0.095739 |
| ANXA2P3    | 10q21.3       | -0.10175 | 0.046876 | 0.095756 |
| ZNF506     | 19p13.11      | -0.10173 | 0.046923 | 0.095841 |
| SLC30A6    | 2p22.3        | -0.10173 | 0.046933 | 0.095852 |
| PP7080     | 5p15.33       | 0.101716 | 0.046959 | 0.095896 |
| RPAP2      | 1p22.1        | -0.10171 | 0.046964 | 0.095896 |
| CCKAR      | 4p15.2        | -0.10171 | 0.046979 | 0.095917 |
| PKM        | 15q23         | 0.101695 | 0.047005 | 0.095959 |
| STARD13    | 13q13.1-q13.2 | -0.10169 | 0.047026 | 0.095986 |
| SRSF6      | 20q13.11      | 0.101685 | 0.047027 | 0.095986 |
| ZFHX3      | 16q22.2-q22.3 | -0.10164 | 0.047125 | 0.096176 |
| ZNF266     | 19p13.2       | 0.101638 | 0.047131 | 0.096178 |
| ANKUB1     | 3q25.1        | -0.1016  | 0.047217 | 0.096345 |
| VPS39      | 15q15.1       | -0.10158 | 0.047254 | 0.09641  |
| LHX6       | 9q33.2        | -0.10155 | 0.047315 | 0.096524 |
| NFYA       | 6p21.1        | 0.101521 | 0.047385 | 0.096658 |
| KMT2E      | 7q22.3        | -0.10151 | 0.0474   | 0.096678 |
| KLHL36     | 16q24.1       | 0.101503 | 0.047426 | 0.09672  |
| GPRC5D     | 12p13.1       | 0.101498 | 0.047436 | 0.096731 |
| TEX2       | 17q23.3       | -0.10147 | 0.047505 | 0.096863 |
| SLC4A3     | 2q35          | -0.10146 | 0.047525 | 0.096886 |
| EPST11     | 13q14.11      | -0.10146 | 0.047526 | 0.096886 |
| AGPAT4     | 6q26          | -0.10145 | 0.047537 | 0.096897 |
| ECM1       | 1q21.2        | -0.10143 | 0.047593 | 0.096998 |
| SPAG16     | 2q34          | -0.10143 | 0.047596 | 0.096998 |
| DNASE2     | 19p13.13      | -0.10141 | 0.047623 | 0.097044 |
| FMC1       | 7q34          | -0.1014  | 0.047655 | 0.097099 |
| RPL10A     | 6p21.31       | -0.10137 | 0.047713 | 0.097208 |
| H2AFB1     | Xq28          | 0.101368 | 0.047722 | 0.097217 |
| SQLE       | 8q24.13       | 0.101349 | 0.047765 | 0.097287 |
| TULP2      | 19q13.33      | -0.10135 | 0.047767 | 0.097287 |
| DEAF1      | 11p15.5       | -0.10134 | 0.047778 | 0.0973   |
| BLOC1S5    | 6p24.3        | -0.10133 | 0.047816 | 0.097365 |
| LYRM1      | 16p12.3       | -0.10132 | 0.04782  | 0.097365 |
| EPC1       | 10p11.22      | -0.10129 | 0.047892 | 0.097503 |
| SLC44A4    | 6p21.33       | 0.101287 | 0.047901 | 0.097511 |
| TAF4       | 20q13.33      | 0.101269 | 0.047941 | 0.097582 |
| CYMP       | 1p13.3        | 0.101266 | 0.047949 | 0.097588 |
| GSTM3      | 1p13.3        | -0.10124 | 0.047996 | 0.097675 |
| NDNF       | 4q27          | -0.10124 | 0.048005 | 0.097676 |
| LSMEM1     | 7q31.1        | 0.10124  | 0.048006 | 0.097676 |
| LAMA2      | 6q22.33       | -0.10123 | 0.048025 | 0.097703 |
| ABCG8      | 2p21          | 0.10121  | 0.048073 | 0.097791 |
| ABHD11-AS1 | 7q11.23       | -0.1012  | 0.048095 | 0.097827 |
| SNAPC3     | 9p22.3        | 0.101187 | 0.048124 | 0.097875 |
| CMTR1      | 6p21.2        | 0.101172 | 0.048157 | 0.097933 |
| ZNF761     | 19q13.42      | 0.10116  | 0.048184 | 0.097977 |
| TOMM70     | 3q12.2        | 0.101152 | 0.048202 | 0.098003 |
| LINC00910  | 17q21.31      | -0.10115 | 0.048208 | 0.098007 |
| HOXA7      | 7p15.2        | 0.101133 | 0.048245 | 0.09807  |
| MAVS       | 20p13         | 0.101129 | 0.048252 | 0.09807  |
| KCTD14     | 11q14.1       | -0.10113 | 0.048254 | 0.09807  |
| LNP1       | 3q12.2        | -0.10111 | 0.048296 | 0.098146 |
| PPP4R1L    | 20q13.32      | 0.101089 | 0.048341 | 0.098226 |
| N4BP1      | 16q12.1       | -0.10108 | 0.048365 | 0.098265 |

|              |          |          |          |          |
|--------------|----------|----------|----------|----------|
| JMY          | 5q14.1   | -0.10106 | 0.048416 | 0.098359 |
| PLEKHA5      | 12p12.3  | -0.10104 | 0.048444 | 0.098406 |
| NKAIN3-IT1   | 8q12.3   | -0.10103 | 0.048475 | 0.09846  |
| LILRB2       | 19q13.42 | -0.10097 | 0.048611 | 0.098726 |
| TEAD2        | 19q13.33 | -0.10096 | 0.048622 | 0.098737 |
| RPS6         | 9p22.1   | -0.10095 | 0.048648 | 0.098781 |
| SLC30A7      | 1p21.2   | -0.10093 | 0.048704 | 0.098885 |
| WDR61        | 15q25.1  | -0.10092 | 0.048728 | 0.098923 |
| GAR1         | 4q25     | 0.100914 | 0.048733 | 0.098924 |
| SLC8A2       | 19q13.32 | -0.1009  | 0.048766 | 0.098981 |
| ADAM6        | 14q32.33 | -0.10089 | 0.048778 | 0.098994 |
| DCBLD2       | 3q12.1 3 | -0.10089 | 0.048786 | 0.099001 |
| CD247        | 1q24.2   | -0.10088 | 0.048821 | 0.099058 |
| GRM7         | 3p26.1   | -0.10087 | 0.048824 | 0.099058 |
| MED11        | 17p13.2  | -0.10085 | 0.048869 | 0.099138 |
| DYSF         | 2p13.2   | -0.10085 | 0.048873 | 0.099138 |
| LOC100129534 | 1p36.32  | 0.100842 | 0.048897 | 0.099175 |
| KIF27        | 9q21.32  | 0.100816 | 0.048955 | 0.099283 |
| IFNLR1       | 1p36.11  | -0.10081 | 0.048973 | 0.099304 |
| TMPRSS9      | 19p13.3  | 0.100806 | 0.048975 | 0.099304 |
| TRIB3        | 20p13    | 0.100804 | 0.04898  | 0.099304 |
| FOXA1        | 14q21.1  | 0.100796 | 0.049    | 0.099332 |
| DRICH1       | 22q11.23 | 0.100794 | 0.049004 | 0.099332 |
| ABHD18       | 4q28.2   | 0.100767 | 0.049064 | 0.099437 |
| MYEF2        | 15q21.1  | -0.10077 | 0.049065 | 0.099437 |
| ACTRT3       | 3q26.2   | -0.10076 | 0.049079 | 0.099453 |
| PRSS30P      | 16p13.3  | -0.10075 | 0.049102 | 0.09949  |
| IL12RB1      | 19p13.11 | -0.10074 | 0.049136 | 0.099546 |
| ST6GAL1      | 3q27.3   | -0.10073 | 0.049139 | 0.099546 |
| MMP17        | 12q24.33 | -0.10072 | 0.049164 | 0.099587 |
| KRT18        | 12q13.13 | 0.100718 | 0.049175 | 0.099595 |
| PRAMEF8      | 1p36.21  | -0.10072 | 0.049181 | 0.099595 |
| TCP11L2      | 12q23.3  | -0.10071 | 0.049183 | 0.099595 |
| TXNL4B       | 16q22.2  | -0.10071 | 0.049192 | 0.099603 |
| DLAT         | 11q23.1  | 0.100703 | 0.049209 | 0.099626 |
| GUCA1B       | 6p21.1   | 0.100697 | 0.049223 | 0.099645 |
| CASP10       | 2q33.1   | 0.100676 | 0.04927  | 0.099729 |
| TCAP         | 17q12    | 0.100651 | 0.049327 | 0.099835 |
| REEP3        | 10q21.3  | -0.10062 | 0.049397 | 0.099966 |
| SURF1        | 9q34.2   | -0.10061 | 0.049409 | 0.099982 |
| BPNT1        | 1q41     | 0.100564 | 0.049524 | 0.100204 |
| KIAA0930     | 22q13.31 | -0.10056 | 0.049542 | 0.10023  |
| C19ORF38     | 19p13.2  | -0.10055 | 0.049551 | 0.100238 |
| SHOX2        | 3q25.32  | -0.10054 | 0.049572 | 0.10027  |
| BAG5         | 14q32.33 | 0.100534 | 0.049593 | 0.100304 |
| SPTBN5       | 15q15.1  | 0.100528 | 0.049607 | 0.10032  |
| PCSK6        | 15q26.3  | 0.100521 | 0.049624 | 0.100345 |
| PDE4DIP      | 1q21.2   | 0.100514 | 0.049639 | 0.100359 |
| ZNF525       | 19q13.42 | 0.100513 | 0.049641 | 0.100359 |
| RFPL2        | 22q12.3  | -0.10049 | 0.049682 | 0.100433 |
| TMEM255B     | 13q34    | -0.10047 | 0.049746 | 0.100552 |
| GABPB1-IT1   | 15q21.2  | -0.10045 | 0.049787 | 0.100623 |
| ZNF45        | 19q13.31 | -0.10044 | 0.04981  | 0.100661 |
| LHX1         | 17q12    | 0.100433 | 0.049824 | 0.100676 |
| CHST5        | 16q23.1  | 0.10043  | 0.04983  | 0.100676 |
| ART1         | 11p15.4  | -0.10043 | 0.049835 | 0.100676 |
| HPF1         | 4q33     | -0.10043 | 0.049838 | 0.100676 |
| SPATC1L      | 21q22.3  | -0.10041 | 0.049874 | 0.100721 |

|           |              |          |          |          |
|-----------|--------------|----------|----------|----------|
| CPT1A     | 11q13.3      | 0.100411 | 0.049874 | 0.100721 |
| PCDHGA11  | 5q31.3       | -0.10041 | 0.049877 | 0.100721 |
| POLE4     | 2p12         | -0.10041 | 0.04988  | 0.100721 |
| PMCHL2    | 5q13.2       | 0.100398 | 0.049903 | 0.100758 |
| GYPB      | 4q31.21      | 0.10039  | 0.049923 | 0.100787 |
| NFATC3    | 16q22.1      | 0.10038  | 0.049946 | 0.100816 |
| DDX23     | 12q13.12     | 0.100379 | 0.049947 | 0.100816 |
| RAC3      | 17q25.3      | 0.100372 | 0.049964 | 0.10084  |
| PADI2     | 1p36.13      | -0.10036 | 0.049986 | 0.100873 |
| CPLANE1   | 5p13.2       | -0.10036 | 0.049991 | 0.100874 |
| TMEM54    | 1p35.1       | 0.100356 | 0.049999 | 0.10088  |
| LINC01588 | 14q21.3      | 0.100345 | 0.050025 | 0.100923 |
| ACSL4     | Xq23         | -0.10033 | 0.050062 | 0.100986 |
| RAB11FIP1 | 8p11.23      | 0.100307 | 0.050112 | 0.101077 |
| FTSJ1     | Xp11.23      | 0.100301 | 0.050127 | 0.101096 |
| ATXN7L1   | 7q22.3       | -0.10028 | 0.050167 | 0.101164 |
| IL3       | 5q31.1       | 0.100282 | 0.05017  | 0.101164 |
| MDM2      | 12q15        | -0.10026 | 0.050227 | 0.101268 |
| FBXO25    | 8p23.3       | -0.10025 | 0.050253 | 0.10131  |
| SNORA3A   | 11p15.4      | 0.100237 | 0.050274 | 0.101342 |
| GBP5      | 1p22.2       | -0.10023 | 0.05029  | 0.101365 |
| PNPLA1    | 6p21.31      | 0.100215 | 0.050324 | 0.101422 |
| ZNF107    | 7q11.21      | 0.100209 | 0.050338 | 0.101435 |
| IRF2BP1   | 19q13.32     | 0.100207 | 0.050342 | 0.101435 |
| LIME1     | 20q13.33     | -0.10021 | 0.050345 | 0.101435 |
| GPR37     | 7q31.33      | -0.1002  | 0.050363 | 0.101461 |
| VHLL      | 1q22         | 0.100192 | 0.050378 | 0.101481 |
| SPRY1     | 4q28.1       | -0.10018 | 0.050413 | 0.101524 |
| SFR1      | 10q25.1      | 0.100176 | 0.050414 | 0.101524 |
| NPBWR1    | 8q11.23      | -0.10018 | 0.050415 | 0.101524 |
| TMEM18    | 2p25.3       | -0.10017 | 0.050423 | 0.101531 |
| INPP5A    | 10q26.3      | -0.10013 | 0.050516 | 0.101708 |
| ATP6AP1   | Xq28         | -0.10012 | 0.050543 | 0.101752 |
| LEMD3     | 12q14.3      | -0.10011 | 0.050559 | 0.101772 |
| C12ORF45  | 12q23.3      | 0.100112 | 0.050563 | 0.101772 |
| KAT8      | 16p11.2      | 0.100107 | 0.050575 | 0.101785 |
| MED21     | 12p11.23     | -0.1001  | 0.050596 | 0.101818 |
| LIPG      | 18q21.1      | 0.100062 | 0.050678 | 0.101971 |
| ADAMTSL4  | 1q21.2       | -0.10005 | 0.050708 | 0.102021 |
| GOLGA2    | 9q34.11      | 0.10004  | 0.05073  | 0.102056 |
| MFF       | 2q36.3       | -0.10001 | 0.050804 | 0.102194 |
| EXOC7     | 17q25.1      | -0.1     | 0.050825 | 0.102226 |
| SLFN5     | 17q12        | -0.09999 | 0.05084  | 0.102247 |
| TRIM49D2  | 11q14.3      | -0.09999 | 0.050855 | 0.102265 |
| MT3       | 16q13        | -0.09998 | 0.050859 | 0.102265 |
| PLAAT5    | 11q12.3      | -0.09997 | 0.050898 | 0.102333 |
| CRYGN     | 7q36.1       | -0.09996 | 0.050922 | 0.10237  |
| EID2B     | 19q13.2      | -0.09995 | 0.050948 | 0.102405 |
| PMM1      | 22q13.2      | -0.09995 | 0.050949 | 0.102405 |
| FIP1L1    | 4q12         | 0.099934 | 0.050976 | 0.102447 |
| TYSND1    | 10q22.1      | 0.099923 | 0.051002 | 0.102489 |
| CTAGE15   | 7q35         | 0.099908 | 0.051036 | 0.102549 |
| GRIK5     | 19q13.2      | -0.09989 | 0.05107  | 0.102606 |
| DENND1B   | 1q31.3       | 0.099883 | 0.051096 | 0.102649 |
| GNA12     | 7p22.3-p22.2 | -0.09988 | 0.051107 | 0.102658 |
| LIN28A    | 1p36.11      | 0.099876 | 0.051111 | 0.102658 |
| FOXL2NB   | 3q22.3       | 0.099868 | 0.051131 | 0.102688 |
| TFDP3     | Xq26.2       | 0.099864 | 0.05114  | 0.102693 |

|             |               |          |          |          |
|-------------|---------------|----------|----------|----------|
| OR7C1       | 19p13.12      | -0.09986 | 0.051144 | 0.102693 |
| IFNE        | 9p21.3        | 0.099858 | 0.051155 | 0.102704 |
| TULP4       | 6q25.3        | 0.099847 | 0.051118 | 0.102745 |
| CIB3        | 19p13.11      | -0.09984 | 0.051198 | 0.102771 |
| CPA1        | 7q32.2        | -0.09983 | 0.051211 | 0.102785 |
| TTY13       | Yq11.223      | 0.099826 | 0.05123  | 0.102813 |
| KRT81       | 12q13.13      | -0.09981 | 0.051266 | 0.102877 |
| SLC14A2     | 18q12.3       | -0.0998  | 0.051289 | 0.102912 |
| KBTBD13     | 15q22.31      | -0.09978 | 0.051326 | 0.102975 |
| IL27        | 16p12.1-p11.2 | -0.09977 | 0.051349 | 0.103012 |
| RPL27A      | 11p15.4       | -0.09977 | 0.051369 | 0.103042 |
| FCN2        | 9q34.3        | -0.09976 | 0.051387 | 0.103068 |
| MEAK7       | 16q24.1       | -0.09974 | 0.051442 | 0.103167 |
| DEGS1       | 1q42.11       | -0.09971 | 0.051506 | 0.103286 |
| ERVFRD-1    | 6p24.2        | -0.0997  | 0.051521 | 0.103306 |
| FOSL1       | 11q13.1       | 0.099663 | 0.051611 | 0.103475 |
| ADAM7       | 8p21.2        | -0.09965 | 0.051636 | 0.103516 |
| SLA2        | 20q11.23      | -0.09957 | 0.051822 | 0.103878 |
| NUDT21      | 16q13         | 0.099565 | 0.051843 | 0.103898 |
| ZNF3        | 7q22.1        | -0.09957 | 0.051843 | 0.103898 |
| NFIL3       | 9q22.31       | -0.09955 | 0.051888 | 0.103976 |
| LRRC58      | 3q13.33       | 0.099544 | 0.051892 | 0.103976 |
| TF          | 3q22.1        | -0.09953 | 0.05192  | 0.104017 |
| SYT3        | 19q13.33      | -0.09953 | 0.051923 | 0.104017 |
| ATP5MC1     | 17q21.32      | 0.099482 | 0.052038 | 0.104238 |
| NPHP3       | 3q22.1        | 0.099467 | 0.052076 | 0.104303 |
| EIF4E2      | 2q37.1        | -0.09945 | 0.052122 | 0.104373 |
| POLDIP2     | 17q11.2       | 0.099447 | 0.052122 | 0.104373 |
| BNIP2       | 15q22.2       | -0.09944 | 0.052135 | 0.104391 |
| CIDECP1     | 3p25.3        | -0.0994  | 0.052233 | 0.104571 |
| GXYLT1      | 12q12         | 0.099399 | 0.052236 | 0.104571 |
| PHF2        | 9q22.31       | 0.099383 | 0.052276 | 0.10464  |
| PCP4L1      | 1q23.3        | -0.09938 | 0.05229  | 0.104658 |
| B3GALT5-AS1 | 21q22.2       | -0.09935 | 0.052359 | 0.104785 |
| ATXN7L3     | 17q21.31      | 0.09934  | 0.052378 | 0.104813 |
| AGFG1       | 2q36.3        | -0.09934 | 0.052385 | 0.104817 |
| CLASP1      | 2q14.2-q14.3  | -0.09931 | 0.052439 | 0.104916 |
| SEMA5A      | 5p15.31       | -0.0993  | 0.052463 | 0.104952 |
| STPG4       | 2p21          | 0.0993   | 0.052472 | 0.10496  |
| KLF13       | 15q13.3       | 0.099297 | 0.05248  | 0.104964 |
| DDAH1       | 1p22.3        | 0.099294 | 0.052487 | 0.104968 |
| RIPOR2      | 6p22.3        | -0.09927 | 0.052537 | 0.105058 |
| ZMIZ1       | 10q22.3       | -0.09924 | 0.052606 | 0.105186 |
| PAPPA       | 9q33.1        | -0.09923 | 0.052636 | 0.105234 |
| EPHA4       | 2q36.1        | -0.09921 | 0.052684 | 0.10532  |
| NUP37       | 12q23.2       | 0.099206 | 0.052697 | 0.105329 |
| PTTG2       | 4p14          | 0.099205 | 0.052699 | 0.105329 |
| C1ORF87     | 1p32.1        | -0.09919 | 0.052728 | 0.105377 |
| PLAC9P1     | 2q21.1        | -0.09919 | 0.052738 | 0.105386 |
| DSCR9       | 21q22.13      | 0.099158 | 0.052812 | 0.105499 |
| APOL1       | 22q12.3       | -0.09916 | 0.052813 | 0.105499 |
| C16ORF87    | 16q11.2       | -0.09916 | 0.052813 | 0.105499 |
| C9          | 5p13.1        | -0.09916 | 0.052816 | 0.105499 |
| SAMD14      | 17q21.33      | -0.09915 | 0.052825 | 0.105507 |
| CAPSL       | 5p13.2        | -0.09914 | 0.052861 | 0.105569 |
| AQP9        | 15q21.3       | -0.09913 | 0.052884 | 0.105604 |
| C2ORF66     | 2q33.1        | 0.099107 | 0.052934 | 0.105688 |
| SCARNA17    | 18q21.1       | 0.099107 | 0.052936 | 0.105688 |

|           |          |          |          |          |
|-----------|----------|----------|----------|----------|
| N4BP3     | 5q35.3   | 0.099075 | 0.053012 | 0.105829 |
| SLC39A6   | 18q12.2  | -0.09906 | 0.053058 | 0.105909 |
| UCP3      | 11q13.4  | 0.099053 | 0.053065 | 0.105912 |
| ZNF649    | 19q13.41 | -0.09903 | 0.053117 | 0.106006 |
| ZFP3      | 17p13.2  | 0.099016 | 0.053154 | 0.106069 |
| CSMD3     | 8q23.3   | -0.09901 | 0.053167 | 0.106085 |
| LINC00111 | 21q22.3  | 0.098991 | 0.053216 | 0.106169 |
| MESP1     | 15q26.1  | 0.098989 | 0.05322  | 0.106169 |
| PNLIPRP3  | 10q25.3  | -0.09897 | 0.053275 | 0.106269 |
| DUSP6     | 12q21.33 | 0.098961 | 0.053288 | 0.106284 |
| FBXO10    | 9p13.2   | -0.09896 | 0.053294 | 0.106285 |
| OR4F29    | 1p36.33  | 0.098948 | 0.053318 | 0.106323 |
| SETDB2    | 13q14.2  | -0.09894 | 0.053345 | 0.106366 |
| KRT72     | 12q13.13 | 0.098931 | 0.053361 | 0.10638  |
| LCE1E     | 1q21.3   | -0.09893 | 0.053362 | 0.10638  |
| FXYD3     | 19q13.12 | -0.09889 | 0.053453 | 0.106549 |
| CALR3     | 19p13.11 | -0.09888 | 0.053474 | 0.106581 |
| SNORA71C  | 20q11.23 | 0.098851 | 0.053554 | 0.106729 |
| DLK1      | 14q32.2  | -0.09885 | 0.053564 | 0.106739 |
| SIRPG     | 20p13    | -0.09881 | 0.053661 | 0.106923 |
| DCAF17    | 2q31.1   | -0.0988  | 0.053678 | 0.106942 |
| NAP1L4    | 11p15.4  | 0.098798 | 0.053684 | 0.106942 |
| ISOC2     | 19q13.42 | 0.098794 | 0.053692 | 0.106942 |
| SNORD15A  | 11q13.4  | -0.09879 | 0.053693 | 0.106942 |
| LAX1      | 1q32.1   | -0.09878 | 0.053735 | 0.107017 |
| SMAD6     | 15q22.31 | 0.098765 | 0.053763 | 0.107052 |
| CRNN      | 1q21.3   | -0.09876 | 0.053764 | 0.107052 |
| ECI2      | 6p25.2   | -0.09876 | 0.053774 | 0.107061 |
| TFF1      | 21q22.3  | 0.098757 | 0.053783 | 0.107068 |
| TTC21A    | 3p22.2   | 0.098742 | 0.053819 | 0.10713  |
| TM9SF1    | 14q12    | -0.09873 | 0.053842 | 0.107165 |
| RAC2      | 22q13.1  | -0.09873 | 0.053848 | 0.107166 |
| IFT140    | 16p13.3  | 0.098713 | 0.053891 | 0.107242 |
| ST7       | 7q31.2   | -0.09871 | 0.053904 | 0.107256 |
| STX16     | 20q13.32 | 0.098696 | 0.053932 | 0.107301 |
| EMC6      | 17p13.2  | 0.098682 | 0.053966 | 0.107358 |
| USF3      | 3q13.2   | 0.09864  | 0.054069 | 0.107553 |
| PTPRH     | 19q13.42 | 0.098631 | 0.054091 | 0.107587 |
| HTR5A     | 7q36.2   | -0.09862 | 0.054114 | 0.107621 |
| THAP9     | 4q21.22  | -0.09859 | 0.054192 | 0.107765 |
| LGSN      | 6q12     | -0.09858 | 0.054219 | 0.107797 |
| XIRP1     | 3p22.2   | -0.09858 | 0.054219 | 0.107797 |
| ING2      | 4q35.1   | 0.09857  | 0.05424  | 0.107828 |
| POLR2I    | 19q13.12 | 0.098559 | 0.054267 | 0.107871 |
| CEACAM4   | 19q13.2  | -0.09855 | 0.054295 | 0.10791  |
| MRPS23    | 17q22    | -0.09855 | 0.054297 | 0.10791  |
| KLF5      | 13q22.1  | 0.098529 | 0.05434  | 0.107982 |
| IKBKG     | Xq28     | 0.098528 | 0.054344 | 0.107982 |
| CXCL9     | 4q21.1   | -0.09852 | 0.054373 | 0.108029 |
| CNTN6     | 3p26.3   | -0.09851 | 0.054386 | 0.108044 |
| KMT5B     | 11q13.2  | -0.09849 | 0.054438 | 0.108134 |
| HIST1H3D  | 6p22.2   | 0.098488 | 0.054442 | 0.108134 |
| CCDC151   | 19p13.2  | -0.09847 | 0.05448  | 0.108198 |
| SLC36A1   | 5q33.1   | -0.09847 | 0.054496 | 0.10822  |
| S100A2    | 1q21.3   | -0.09846 | 0.054504 | 0.108224 |
| NAB2      | 12q13.3  | -0.09842 | 0.054602 | 0.108409 |
| OR7A5     | 19p13.12 | -0.09841 | 0.054637 | 0.108467 |
| DCTN1     | 2p13.1   | -0.09841 | 0.054643 | 0.108469 |

|          |               |          |          |          |
|----------|---------------|----------|----------|----------|
| MPG      | 16p13.3       | -0.09836 | 0.054749 | 0.108668 |
| SLC6A3   | 5p15.33       | -0.09834 | 0.054805 | 0.108769 |
| SRBD1    | 2p21          | -0.09833 | 0.05484  | 0.108826 |
| SHISA5   | 3p21.31       | -0.09832 | 0.054845 | 0.108826 |
| PIGM     | 1q23.2        | 0.098321 | 0.054855 | 0.108835 |
| TMEM229B | 14q24.1       | -0.09828 | 0.054964 | 0.10904  |
| ZNF200   | 16p13.3       | 0.098264 | 0.054996 | 0.109091 |
| PTPN20   | 10q11.22      | 0.098262 | 0.055001 | 0.109091 |
| DRAXIN   | 1p36.22       | -0.09825 | 0.055019 | 0.109117 |
| CACNG1   | 17q24.2       | -0.09824 | 0.055061 | 0.10919  |
| SNED1    | 2q37.3        | -0.09823 | 0.055079 | 0.109214 |
| SEC14L1  | 17q25.2-q25.3 | -0.09822 | 0.0551   | 0.109246 |
| NOL4     | 18q12.1       | -0.09821 | 0.05512  | 0.109275 |
| STIMATE  | 3p21.1        | -0.0982  | 0.05516  | 0.109342 |
| SHANK2   | 11q13.3-q13.4 | -0.09819 | 0.055171 | 0.109354 |
| OR13G1   | 1q44          | 0.098191 | 0.055177 | 0.109355 |
| MIXL1    | 1q42.12       | -0.09817 | 0.055229 | 0.109447 |
| GJA8     | 1q21.2        | 0.098164 | 0.055245 | 0.109469 |
| C1QTNF4  | 11p11.2       | -0.09816 | 0.055251 | 0.109469 |
| SNRPGP15 | 19p13.12      | 0.098153 | 0.055272 | 0.109499 |
| ZBTB12   | 6p21.33       | 0.098127 | 0.055338 | 0.109619 |
| PHOX2A   | 11q13.4       | -0.09811 | 0.055368 | 0.109668 |
| QPCT     | 2p22.2        | -0.09811 | 0.055373 | 0.109668 |
| PEX13    | 2p15          | -0.09811 | 0.055385 | 0.109681 |
| UNC45B   | 17q12         | -0.0981  | 0.055405 | 0.109702 |
| PARG     | 10q11.23      | 0.098099 | 0.055407 | 0.109702 |
| UBALD2   | 17q25.1       | 0.098085 | 0.055443 | 0.109756 |
| C17ORF99 | 17q25.3       | 0.098084 | 0.055445 | 0.109756 |
| ANKRD17  | 4q13.3        | 0.098054 | 0.05552  | 0.109893 |
| SLC51A   | 3q29          | -0.09804 | 0.055561 | 0.109963 |
| DDI2     | 1p36.21       | 0.098021 | 0.055602 | 0.110033 |
| STARD4   | 5q22.1        | 0.098016 | 0.055614 | 0.110047 |
| PEAK3    | 19p13.3       | -0.09801 | 0.055624 | 0.110056 |
| OR10G7   | 11q24.2       | -0.098   | 0.055657 | 0.110109 |
| MUS81    | 11q13.1       | 0.097993 | 0.055674 | 0.110133 |
| WNK1     | 12p13.33      | -0.09799 | 0.05569  | 0.110152 |
| AFTPH    | 2p14          | -0.09798 | 0.055714 | 0.11019  |
| SENP1    | 12q13.11      | 0.097972 | 0.055727 | 0.110204 |
| NAA35    | 9q21.33       | 0.097969 | 0.055734 | 0.110207 |
| UCP1     | 4q31.1        | -0.09794 | 0.055794 | 0.110316 |
| ZNF831   | 20q13.32      | -0.09794 | 0.055813 | 0.110343 |
| MRPS11   | 15q25.3       | 0.097919 | 0.055859 | 0.110421 |
| RPS9     | 19q13.42      | -0.09791 | 0.055883 | 0.110459 |
| FUNDC1   | Xp11.3        | -0.0979  | 0.05591  | 0.1105   |
| PTGER2   | 14q22.1       | -0.09789 | 0.05592  | 0.1105   |
| TBCE     | 1q42.3        | 0.097894 | 0.055923 | 0.1105   |
| TNKS2    | 10q23.32      | -0.09789 | 0.055926 | 0.1105   |
| EIF2S3   | Xp22.11       | 0.09788  | 0.055957 | 0.11055  |
| TMEM234  | 1p35.2        | 0.097873 | 0.055975 | 0.110571 |
| ELMSAN1  | 14q24.3       | 0.097872 | 0.055978 | 0.110571 |
| FAM27C   | 9q13          | 0.097848 | 0.056037 | 0.110676 |
| CNPY2    | 12q13.3       | -0.09782 | 0.056115 | 0.110814 |
| SNAR-C4  | 19q13.33      | 0.097816 | 0.056118 | 0.110814 |
| LGALS9B  | 17p11.2       | -0.09779 | 0.056184 | 0.110932 |
| SGPP2    | 2q36.1        | 0.097788 | 0.056189 | 0.110932 |
| INSIG1   | 7q36.3        | 0.097782 | 0.056203 | 0.11094  |
| PANK3    | 5q34          | 0.097782 | 0.056204 | 0.11094  |
| OXNAD1   | 3p25.1-p24.3  | 0.09777  | 0.056234 | 0.110988 |

|          |                     |          |          |          |
|----------|---------------------|----------|----------|----------|
| SLC25A35 | 17p13.1             | 0.097759 | 0.056262 | 0.111033 |
| UBASH3A  | 21q22.3             | -0.09775 | 0.056273 | 0.111043 |
| DDX28    | 16q22.1             | 0.097742 | 0.056306 | 0.111083 |
| ZBTB46   | 20q13.33            | -0.09774 | 0.056309 | 0.111083 |
| PRPS2    | Xp22.2              | 0.09774  | 0.05631  | 0.111083 |
| P2RY4    | Xq13.1              | 0.097712 | 0.056382 | 0.111214 |
| PLAU     | 10q22.2             | -0.09769 | 0.056438 | 0.111314 |
| POTEC    | 18p11.21            | 0.09766  | 0.056515 | 0.111454 |
| LASP1    | 17q12               | 0.097632 | 0.056586 | 0.111584 |
| JAK3     | 19p13.11            | -0.09763 | 0.056598 | 0.111597 |
| GNAI3    | 1p13.3              | -0.09762 | 0.056607 | 0.111604 |
| ADORA1   | 1q32.1              | -0.0976  | 0.056665 | 0.111703 |
| CDKN1A   | 6p21.2              | -0.0976  | 0.056671 | 0.111703 |
| WRB      | 21q22.2             | -0.0976  | 0.056674 | 0.111703 |
| DCTPP1   | 16p11.2             | 0.097583 | 0.056711 | 0.111764 |
| NAALAD2  | 11q14.3             | -0.09758 | 0.056726 | 0.111783 |
| SNTN     | 3p14.2              | -0.09756 | 0.05677  | 0.111857 |
| CYP51A1  | 7q21.2              | 0.097557 | 0.056775 | 0.111857 |
| MYO1D    | 17q11.2             | -0.09755 | 0.056804 | 0.111905 |
| ZNF263   | 16p13.3             | 0.097538 | 0.056824 | 0.111925 |
| STBD1    | 4q21.1              | -0.09754 | 0.056827 | 0.111925 |
| CCL8     | 17q12               | -0.09754 | 0.056831 | 0.111925 |
| RNF152   | 18q21.33            | -0.09752 | 0.05687  | 0.11198  |
| LIPN     | 10q23.31            | -0.09752 | 0.05687  | 0.11198  |
| POU6F2   | 7p14.1              | -0.09748 | 0.056984 | 0.112193 |
| OXCT2    | 1p34.2              | 0.097458 | 0.057029 | 0.112271 |
| STRAP    | 12p12.3             | -0.09745 | 0.057056 | 0.112313 |
| GK       | Xp21.2              | 0.097432 | 0.057094 | 0.112376 |
| CLSTN3   | 12p13.31            | -0.09742 | 0.057126 | 0.112428 |
| HOOK1    | 1p32.1              | 0.097415 | 0.057139 | 0.112441 |
| TAS2R9   | 12p13.2             | 0.097403 | 0.05717  | 0.112492 |
| SELENOW  | 19q13.33            | -0.09739 | 0.057191 | 0.112522 |
| GUCA2A   | 1p34.2              | -0.09739 | 0.057202 | 0.112533 |
| ATP5ME   | 4p16.3              | 0.097366 | 0.057265 | 0.112645 |
| ZNF484   | 9q22.31             | -0.09736 | 0.057275 | 0.112654 |
| PDE6D    | 2q37.1              | -0.09736 | 0.057288 | 0.112668 |
| SYCP2L   | 6p24.2              | -0.09733 | 0.057352 | 0.112784 |
| BANP     | 16q24.2             | 0.097327 | 0.057366 | 0.112801 |
| NEIL2    | 8p23.1              | -0.0973  | 0.057428 | 0.112912 |
| JAKMIP1  | 4p16.1              | -0.09728 | 0.057481 | 0.113004 |
| GPAA1    | 8q24.3              | 0.097262 | 0.057533 | 0.113095 |
| IL17RC   | 3p25.3 3p25.3-p24.1 | -0.09725 | 0.057568 | 0.113152 |
| COPE     | 19p13.11            | 0.097239 | 0.057592 | 0.113189 |
| IL2RB    | 22q12.3             | -0.09723 | 0.057614 | 0.113221 |
| CLUL1    | 18p11.32            | -0.09722 | 0.057643 | 0.113267 |
| SPATA3   | 2q37.1              | 0.097197 | 0.057701 | 0.113369 |
| ELAVL2   | 9p21.3              | -0.09718 | 0.057746 | 0.113448 |
| HEXD     | 17q25.3             | 0.097167 | 0.057777 | 0.113498 |
| ZDHHC8P1 | 22q11.23            | 0.097138 | 0.057852 | 0.113633 |
| TMEM249  | 8q24.3              | 0.097132 | 0.057867 | 0.113652 |
| VPS33B   | 15q26.1             | 0.097109 | 0.057928 | 0.113761 |
| VPS13D   | 1p36.22-p36.21      | 0.097105 | 0.057939 | 0.113771 |
| SCML2    | Xp22.13             | 0.097086 | 0.057987 | 0.113844 |
| CD7      | 17q25.3             | -0.09709 | 0.057988 | 0.113844 |
| SLC6A12  | 12p13.33            | -0.09707 | 0.058036 | 0.113921 |
| RRP15    | 1q41                | 0.097066 | 0.058039 | 0.113921 |
| ATP6V1B1 | 2p13.3              | -0.09706 | 0.058066 | 0.113964 |
| RSRC1    | 3q25.32             | 0.09704  | 0.058107 | 0.114033 |

|             |            |          |          |          |
|-------------|------------|----------|----------|----------|
| CBLB        | 3q13.11    | -0.09702 | 0.05817  | 0.114137 |
| ATP2B3      | Xq28       | -0.09702 | 0.058171 | 0.114137 |
| GUSBP5      | 4q31.21    | -0.09701 | 0.058182 | 0.114147 |
| KCNK4       | 11q13.1    | -0.097   | 0.058207 | 0.114177 |
| HBM         | 16p13.3    | 0.097001 | 0.058209 | 0.114177 |
| MPC1        | 6q27       | 0.096989 | 0.058241 | 0.114228 |
| SSB         | 2q31.1     | -0.09697 | 0.058281 | 0.114296 |
| FAM74A3     | 9q21.11    | -0.09695 | 0.058354 | 0.114429 |
| SSR4P1      | 21q22.3    | -0.09694 | 0.05836  | 0.114429 |
| MCOLN3      | 1p22.3     | 0.096937 | 0.058376 | 0.114449 |
| PCDHA9      | 5q31.3     | -0.09693 | 0.058392 | 0.114447 |
| MCMDC2      | 8q13.1     | -0.09692 | 0.058425 | 0.114522 |
| MYOM3       | 1p36.11    | -0.09692 | 0.058432 | 0.114525 |
| ASB7        | 15q26.3    | -0.09689 | 0.058504 | 0.114645 |
| TOMM20      | 1q42.3     | 0.096888 | 0.058505 | 0.114645 |
| ZNF141      | 4p16.3     | 0.096883 | 0.058515 | 0.114655 |
| RBP2        | 3q23       | -0.09687 | 0.058559 | 0.11473  |
| RALGAPB     | 20q11.23   | -0.09683 | 0.058664 | 0.114923 |
| SFTPC       | 8p21.3     | -0.09682 | 0.058679 | 0.114942 |
| SERPINB5    | 18q21.33   | 0.096781 | 0.058784 | 0.115136 |
| PSMB11      | 14q11.2    | 0.096763 | 0.058831 | 0.115216 |
| TRIM68      | 11p15.4    | -0.09674 | 0.05888  | 0.115302 |
| EIF2B4      | 2p23.3     | -0.09673 | 0.058907 | 0.115344 |
| CHD1        | 5q15-q21.1 | 0.096713 | 0.058962 | 0.11544  |
| MAPK9       | 5q35.3     | 0.096708 | 0.058976 | 0.115456 |
| PRMT5       | 14q11.2    | 0.096694 | 0.059013 | 0.115516 |
| CNTNAP5     | 2q14.3     | -0.09668 | 0.059042 | 0.115563 |
| BSG         | 19p13.3    | 0.096661 | 0.0591   | 0.115656 |
| TNFRSF13B   | 17p11.2    | -0.09666 | 0.059101 | 0.115656 |
| FBXL15      | 10q24.32   | 0.096658 | 0.059108 | 0.115657 |
| WNT4        | 1p36.12    | -0.09665 | 0.059119 | 0.115667 |
| GEMIN7      | 19q13.32   | 0.096622 | 0.059203 | 0.115821 |
| SENP8       | 15q23      | -0.0966  | 0.059252 | 0.115904 |
| SYT8        | 11p15.5    | 0.096601 | 0.059257 | 0.115904 |
| UBAP1L      | 15q22.31   | 0.09655  | 0.059393 | 0.116158 |
| ALX3        | 1p13.3     | 0.096506 | 0.059509 | 0.116374 |
| GABRD       | 1p36.33    | -0.09649 | 0.05955  | 0.116443 |
| NFKBIZ      | 3q12.3     | 0.096484 | 0.059567 | 0.116464 |
| AEN         | 15q26.1    | 0.096477 | 0.059586 | 0.116491 |
| TOMM40L     | 1q23.3     | 0.096467 | 0.059614 | 0.116533 |
| GRXCR2      | 5q32       | 0.096438 | 0.059691 | 0.116673 |
| CACNG7      | 19q13.42   | -0.0964  | 0.059781 | 0.116837 |
| PPP1R35     | 7q22.1     | 0.096398 | 0.059796 | 0.11685  |
| RAPGEF2     | 4q32.1     | -0.0964  | 0.059799 | 0.11685  |
| IFITM4P     | 6p22.1     | 0.096376 | 0.059854 | 0.116946 |
| ITGAD       | 16p11.2    | -0.09636 | 0.059887 | 0.116999 |
| TREML3P     | 6p21.1     | -0.09635 | 0.059922 | 0.11705  |
| MYO15B      | 17q25.1    | 0.09635  | 0.059925 | 0.11705  |
| ABHD1       | 2p23.3     | -0.09634 | 0.059938 | 0.117064 |
| POU4F2      | 4q31.22    | -0.09634 | 0.059944 | 0.117065 |
| AMPD1       | 1p13.2     | -0.09634 | 0.059956 | 0.117076 |
| TERF1       | 8q21.11    | -0.09633 | 0.059974 | 0.117101 |
| ZBTB33      | Xq24       | -0.09629 | 0.060082 | 0.117299 |
| TSG1        | 6q16.1     | -0.09629 | 0.060092 | 0.117308 |
| PIM3        | 22q13.33   | 0.09626  | 0.060165 | 0.117439 |
| TMEM254-AS1 | 10q22.3    | -0.09625 | 0.060204 | 0.117503 |
| PKLR        | 1q22       | -0.09624 | 0.060209 | 0.117503 |
| LOC284441   | 19p12      | -0.09624 | 0.060216 | 0.117504 |



|            |          |          |          |          |
|------------|----------|----------|----------|----------|
| YIPF7      | 4p12     | -0.09623 | 0.060239 | 0.117529 |
| MOB2       | 11p15.5  | -0.09623 | 0.060241 | 0.117529 |
| GSTTP2     | 22q11.23 | 0.096206 | 0.06031  | 0.117653 |
| ZDHHC9     | Xq26.1   | -0.0962  | 0.060325 | 0.117672 |
| NOTCH2     | 1p12     | -0.09617 | 0.060411 | 0.117817 |
| GPATCH3    | 1p36.11  | -0.09617 | 0.060417 | 0.117817 |
| FBXO38     | 5q32     | -0.09617 | 0.060417 | 0.117817 |
| SERPINB7   | 18q21.33 | -0.09614 | 0.060476 | 0.11792  |
| BPHL       | 6p25.2   | -0.09613 | 0.060511 | 0.117976 |
| SPDYE3     | 7q22.1   | -0.09612 | 0.060534 | 0.117999 |
| C10ORF99   | 10q23.1  | -0.09612 | 0.060538 | 0.117999 |
| SCAPER     | 15q24.3  | -0.09612 | 0.060541 | 0.117999 |
| PSTK       | 10q26.13 | -0.09612 | 0.060546 | 0.117999 |
| ATP5MC2    | 12q13.13 | -0.09611 | 0.060562 | 0.118018 |
| MMAB       | 12q24.11 | 0.096105 | 0.060581 | 0.118021 |
| IGDCC4     | 15q22.31 | -0.0961  | 0.060583 | 0.118021 |
| CD163L1    | 12p13.31 | -0.0961  | 0.060589 | 0.118021 |
| SLC25A32   | 8q22.3   | -0.0961  | 0.060591 | 0.118021 |
| SCMH1      | 1p34.2   | 0.0961   | 0.060593 | 0.118021 |
| BOP1       | 8q24.3   | 0.096091 | 0.060618 | 0.118059 |
| RPS6KA1    | 1p36.11  | 0.096088 | 0.060626 | 0.118063 |
| DEFB132    | 20p13    | -0.09608 | 0.060637 | 0.118073 |
| CLUAP1     | 16p13.3  | -0.09608 | 0.060649 | 0.118084 |
| OR52K2     | 11p15.4  | -0.09607 | 0.060669 | 0.118111 |
| HDAC6      | Xp11.23  | 0.096044 | 0.060744 | 0.118246 |
| UBC        | 12q24.31 | -0.09602 | 0.060822 | 0.118387 |
| ZNF23      | 16q22.2  | 0.096006 | 0.060846 | 0.118423 |
| ECE1       | 1p36.12  | -0.09599 | 0.060881 | 0.118478 |
| ZNF562     | 19p13.2  | 0.09599  | 0.06089  | 0.118486 |
| ZDHHC2     | 8p22     | -0.09597 | 0.060957 | 0.118603 |
| RASAL2-AS1 | 1q25.2   | -0.09595 | 0.060995 | 0.118666 |
| PLIN1      | 15q26.1  | -0.09594 | 0.061036 | 0.118735 |
| CCDC146    | 7q11.23  | 0.095842 | 0.061292 | 0.119221 |
| NOP56      | 20p13    | 0.095837 | 0.061305 | 0.119235 |
| UBA3       | 3p14.1   | -0.09582 | 0.061359 | 0.119326 |
| APOM       | 6p21.33  | -0.09581 | 0.061368 | 0.119326 |
| LALBA      | 12q13.11 | 0.095813 | 0.06137  | 0.119326 |
| EPHX3      | 19p13.12 | -0.0958  | 0.061406 | 0.119383 |
| OSTCP1     | 6q25.3   | -0.0958  | 0.061411 | 0.119383 |
| CTXN1      | 19p13.2  | 0.095788 | 0.061438 | 0.119424 |
| ANAPC15    | 11q13.4  | 0.095784 | 0.061448 | 0.119431 |
| ZFP36      | 19q13.2  | 0.095777 | 0.061469 | 0.119461 |
| STUB1      | 16p13.3  | 0.095772 | 0.061482 | 0.119473 |
| CARD16     | 11q22.3  | -0.09574 | 0.061567 | 0.119627 |
| LINS1      | 15q26.3  | 0.095737 | 0.061579 | 0.119639 |
| PPIA       | 7p13     | 0.095733 | 0.061589 | 0.119648 |
| PTAR1      | 9q21.12  | 0.095716 | 0.061634 | 0.119712 |
| TPPP3      | 16q22.1  | -0.09572 | 0.061634 | 0.119712 |
| DOCK11     | Xq24     | -0.09571 | 0.061644 | 0.119718 |
| MCUR1      | 6p23     | 0.09571  | 0.061652 | 0.119723 |
| ITGB3      | 17q21.32 | -0.09571 | 0.06166  | 0.119726 |
| TAF7L      | Xq22.1   | 0.095701 | 0.061676 | 0.119747 |
| DCAF5      | 14q24.1  | -0.09568 | 0.061738 | 0.119855 |
| LOC91450   | 15q24.3  | 0.095669 | 0.061764 | 0.119895 |
| CPNE4      | 3q22.1   | -0.09566 | 0.061776 | 0.119906 |
| STT3A      | 11q24.2  | 0.095655 | 0.061802 | 0.119944 |
| GPR12      | 13q12.13 | -0.09558 | 0.061997 | 0.120311 |
| CMSS1      | 3q12.1   | 0.095567 | 0.062042 | 0.120388 |

|            |                       |          |          |          |
|------------|-----------------------|----------|----------|----------|
| HNRNPA1P33 | 10q11.22              | 0.095561 | 0.062058 | 0.120407 |
| URGCP      | 7p13                  | 0.09555  | 0.062089 | 0.120455 |
| P4HA1      | 10q22.1               | -0.09554 | 0.062124 | 0.120511 |
| ADGRG6     | 6q24.2                | 0.095528 | 0.062151 | 0.120551 |
| PDLIM5     | 4q22.3                | -0.09551 | 0.062199 | 0.120625 |
| H19        | 11p15.5               | -0.09551 | 0.062201 | 0.120625 |
| SLC66A1L   | 3q25.32               | -0.0955  | 0.062216 | 0.120643 |
| CFAP97     | 4q35.1                | -0.09549 | 0.062256 | 0.120707 |
| SERTAD2    | 2p14                  | -0.09549 | 0.062261 | 0.120707 |
| IL2RA      | 10p15.1               | -0.09547 | 0.062306 | 0.120781 |
| FAM71E2    | 19q13.42              | 0.095464 | 0.062324 | 0.120806 |
| TAF12      | 1p35.3                | -0.09544 | 0.062397 | 0.120934 |
| C6ORF89    | 6p21.2                | -0.09544 | 0.062403 | 0.120934 |
| COX17      | 3q13.33               | 0.095419 | 0.062451 | 0.121017 |
| DBNDD2     | 20q13.12              | -0.09537 | 0.062573 | 0.121241 |
| SPHKAP     | 2q36.3                | -0.09535 | 0.062641 | 0.121362 |
| HOXB7      | 17q21.32              | 0.095332 | 0.062691 | 0.121446 |
| XBP1       | 22q12.1 22q12         | -0.09533 | 0.062708 | 0.121459 |
| NISCH      | 3p21.1                | 0.095325 | 0.062709 | 0.121459 |
| MINDY4     | 7p14.3                | 0.095305 | 0.062765 | 0.121554 |
| ZFAND2B    | 2q35                  | 0.0953   | 0.062778 | 0.121568 |
| LDAH       | 2p24.1                | -0.09529 | 0.062795 | 0.12159  |
| NHLH1      | 1q23.2                | 0.095257 | 0.062898 | 0.121757 |
| FLVCR2     | 14q24.3               | -0.09526 | 0.062899 | 0.121757 |
| SLC25A46   | 5q22.1                | -0.09525 | 0.062905 | 0.121757 |
| SIX3       | 2p21                  | -0.09525 | 0.062909 | 0.121757 |
| LINC00698  | 3p14.2                | 0.095252 | 0.062912 | 0.121757 |
| GHRH       | 20q11.23              | -0.09524 | 0.062944 | 0.121807 |
| IL2RG      | Xq13.1                | -0.09523 | 0.062961 | 0.121829 |
| CDX1       | 5q32                  | 0.095209 | 0.063033 | 0.121955 |
| CCDC136    | 7q32.1                | -0.0952  | 0.063061 | 0.121997 |
| SUN2       | 22q13.1               | -0.0952  | 0.063067 | 0.121998 |
| TSKS       | 19q13.33              | -0.09519 | 0.063082 | 0.122015 |
| CCT5       | 5p15.2                | 0.095161 | 0.063166 | 0.122163 |
| IL18R1     | 2q12.1                | -0.09516 | 0.063171 | 0.122163 |
|            | 8-Mar 10q11.21-q11.22 | -0.09515 | 0.0632   | 0.122209 |
| ZKSCAN4    | 6p22.1                | -0.09514 | 0.063231 | 0.122256 |
| NFYB       | 12q23.3               | -0.09512 | 0.063266 | 0.122311 |
| CHRNB1     | 17p13.1               | -0.09509 | 0.063349 | 0.122461 |
| ZNF467     | 7q36.1                | -0.09509 | 0.063356 | 0.122462 |
| TMSB4XP8   | 4q22.1                | -0.09508 | 0.063397 | 0.12253  |
| ATG10      | 5q14.1-q14.2          | -0.09507 | 0.063409 | 0.122541 |
| NOTO       | 2p13.2                | 0.095066 | 0.063429 | 0.122558 |
| ZNF581     | 19q13.42              | -0.09507 | 0.06343  | 0.122558 |
| ZNF485     | 10q11.21              | 0.095062 | 0.063442 | 0.12257  |
| MTX3       | 5q14.1                | 0.095057 | 0.063455 | 0.122583 |
| KIAA2013   | 1p36.22               | 0.095047 | 0.063482 | 0.122623 |
| RPL24      | 3q12.3                | -0.09504 | 0.063498 | 0.122633 |
| KATNAL2    | 18q21.1               | 0.095041 | 0.0635   | 0.122633 |
| ZFP92      | Xq28                  | -0.09503 | 0.063526 | 0.122673 |
| DDX49      | 19p13.11              | 0.095008 | 0.063591 | 0.122787 |
| PGAM4      | Xq21.1                | 0.094994 | 0.063631 | 0.122852 |
| RNF169     | 11q13.4               | 0.094986 | 0.063653 | 0.122871 |
| VGF        | 7q22.1                | 0.094986 | 0.063653 | 0.122871 |
| PYCR3      | 8q24.3                | 0.094976 | 0.063682 | 0.122915 |
| IGFBP2     | 2q35                  | -0.09496 | 0.063727 | 0.122983 |
| DNAJC16    | 1p36.21               | 0.094959 | 0.06373  | 0.122983 |
| KRT24      | 17q21.2               | -0.09491 | 0.063856 | 0.123214 |

|           |          |          |          |          |
|-----------|----------|----------|----------|----------|
| OSBPL5    | 11p15.4  | 0.094869 | 0.063983 | 0.123448 |
| IBSP      | 4q22.1   | -0.09486 | 0.064    | 0.123468 |
| CACNA1C   | 12p13.33 | -0.09485 | 0.064027 | 0.123509 |
| RPL13AP20 | 12p13.1  | -0.09481 | 0.064153 | 0.123741 |
| LTA4H     | 12q23.1  | -0.0948  | 0.064181 | 0.123782 |
| BCL3      | 19q13.32 | 0.09479  | 0.064205 | 0.123816 |
| SLC25A16  | 10q21.3  | 0.09477  | 0.064262 | 0.123915 |
| NORAD     | 20q11.23 | -0.09477 | 0.06427  | 0.123918 |
| FKBP11    | 12q13.12 | -0.09474 | 0.06436  | 0.12408  |
| ZNF268    | 12q24.33 | -0.09473 | 0.064371 | 0.12409  |
| DMXL1     | 5q23.1   | -0.09473 | 0.064383 | 0.124096 |
| ZC3H7B    | 22q13.2  | 0.094726 | 0.064387 | 0.124096 |
| WDR24     | 16p13.3  | 0.094715 | 0.064417 | 0.124141 |
| FXVD4     | 10q11.21 | 0.09469  | 0.064488 | 0.124266 |
| SULT1E1   | 4q13.3   | -0.09468 | 0.064511 | 0.124289 |
| PTMS      | 12p13.31 | -0.09468 | 0.064512 | 0.124289 |
| POLR3G    | 5q14.3   | 0.094675 | 0.064532 | 0.124315 |
| MAPK14    | 6p21.31  | -0.09467 | 0.064544 | 0.124327 |
| ZNHIT6    | 1p22.3   | -0.09466 | 0.064575 | 0.124375 |
| HAL       | 12q23.1  | 0.094626 | 0.064669 | 0.124543 |
| AGR3      | 7p21.1   | 0.094623 | 0.064677 | 0.124548 |
| MYL10     | 7q22.1   | -0.09462 | 0.064693 | 0.124566 |
| ALAS2     | Xp11.21  | 0.094608 | 0.064722 | 0.124609 |
| UXT       | Xp11.23  | -0.0946  | 0.064734 | 0.124616 |
| LSM5      | 7p14.3   | 0.094601 | 0.064741 | 0.124616 |
| PCDH1     | 5q31.3   | 0.0946   | 0.064744 | 0.124616 |
| SF3B1     | 2q33.1   | 0.094594 | 0.064761 | 0.124636 |
| PAX7      | 1p36.13  | -0.09456 | 0.064855 | 0.124806 |
| TTLL7     | 1p31.1   | -0.09449 | 0.065066 | 0.1252   |
| TPTE2P1   | 13q12.13 | -0.09448 | 0.065093 | 0.12524  |
| RGS16     | 1q25.3   | -0.09446 | 0.065142 | 0.125321 |
| ERMP1     | 9p24.1   | 0.094456 | 0.065153 | 0.12533  |
| MAG       | 19q13.12 | -0.09443 | 0.065225 | 0.125458 |
| C1ORF105  | 1q24.3   | -0.09443 | 0.065238 | 0.125468 |
| PLTP      | 20q13.12 | -0.09442 | 0.065243 | 0.125468 |
| TLE6      | 19p13.3  | 0.094414 | 0.065275 | 0.125517 |
| LINC00319 | 21q22.3  | 0.094388 | 0.065348 | 0.125645 |
| NUAK2     | 1q32.1   | 0.094371 | 0.065398 | 0.125731 |
| PXMP4     | 20q11.22 | -0.09435 | 0.065454 | 0.125825 |
| CDC23     | 5q31.2   | 0.094338 | 0.065492 | 0.125886 |
| PCED1B    | 12q13.11 | -0.09433 | 0.06551  | 0.125899 |
| DUOX1     | 15q21.1  | 0.09433  | 0.065514 | 0.125899 |
| MS4A1     | 11q12.2  | -0.09433 | 0.065517 | 0.125899 |
| OR1F2P    | 16p13.3  | -0.09432 | 0.065533 | 0.125914 |
| MUCL1     | 12q13.2  | -0.09432 | 0.065538 | 0.125914 |
| DNASE1L3  | 3p14.3   | -0.0943  | 0.065611 | 0.126042 |
| ITGAL     | 16p11.2  | -0.09428 | 0.065646 | 0.126098 |
| FAM78A    | 9q34.13  | -0.09426 | 0.065714 | 0.126217 |
| CACNG4    | 17q24.2  | -0.09423 | 0.065798 | 0.126363 |
| FLYWCH2   | 16p13.3  | -0.09423 | 0.065803 | 0.126363 |
| PRRT3     | 3p25.3   | -0.09422 | 0.065834 | 0.126409 |
| PCA3      | 9q21.2   | 0.094215 | 0.065844 | 0.126413 |
| FXR1      | 3q26.33  | -0.09421 | 0.065848 | 0.126413 |
| CCM2      | 7p13     | 0.094209 | 0.065863 | 0.12643  |
| LINC01184 | 5q23.3   | -0.0942  | 0.065888 | 0.126459 |
| TASP1     | 20p12.1  | -0.0942  | 0.065891 | 0.126459 |
| AMPD3     | 11p15.4  | -0.09419 | 0.065904 | 0.126471 |
| ZNF625    | 19p13.2  | -0.09419 | 0.065916 | 0.126482 |

|             |          |          |          |          |
|-------------|----------|----------|----------|----------|
| ODF2L       | 1p22.3   | -0.09418 | 0.065946 | 0.126528 |
| ACE2        | Xp22.2   | -0.09417 | 0.065983 | 0.126587 |
| MRPL18      | 6q25.3   | 0.094137 | 0.066071 | 0.126744 |
| PEX19       | 1q23.2   | -0.09413 | 0.066083 | 0.126749 |
| GPR132      | 14q32.33 | -0.09413 | 0.066087 | 0.126749 |
| BCR         | 22q11.23 | 0.094122 | 0.066113 | 0.126777 |
| PARN        | 16p13.12 | -0.09412 | 0.066116 | 0.126777 |
| SNORD116-20 | 15q11.2  | -0.09412 | 0.06612  | 0.126777 |
| OR2H1       | 6p22.1   | 0.094107 | 0.066156 | 0.126835 |
| PSMC3       | 11p11.2  | 0.094103 | 0.066168 | 0.126846 |
| LGALS12     | 11q12.3  | -0.09409 | 0.066206 | 0.126905 |
| SNHG17      | 20q11.23 | 0.094055 | 0.066308 | 0.12708  |
| RABEP1      | 17p13.2  | -0.09405 | 0.066312 | 0.12708  |
| AARS        | 16q22.1  | 0.094052 | 0.066316 | 0.12708  |
| PPBPP2      | 4q13.3   | 0.094048 | 0.066329 | 0.127092 |
| SSNA1       | 9q34.3   | 0.094044 | 0.066339 | 0.127099 |
| HIPK1       | 1p13.2   | 0.094039 | 0.066353 | 0.127114 |
| DDX3X       | Xp11.4   | -0.09403 | 0.066382 | 0.127158 |
| NKAIN2      | 6q22.31  | -0.09403 | 0.066394 | 0.127169 |
| RAF1        | 3p25.2   | 0.094015 | 0.066424 | 0.127214 |
| HIST1H2AJ   | 6p22.1   | 0.094006 | 0.066451 | 0.127254 |
| SLC10A3     | Xq28     | -0.09399 | 0.066487 | 0.12731  |
| PRDM2       | 1p36.21  | -0.09396 | 0.066573 | 0.127463 |
| C4BPB       | 1q32.1   | 0.093956 | 0.066595 | 0.127492 |
| FGFR4       | 5q35.2   | 0.093943 | 0.066633 | 0.127542 |
| FBXL14      | 12p13.33 | 0.093943 | 0.066634 | 0.127542 |
| TXNDC5      | 6p24.3   | -0.09394 | 0.066651 | 0.127563 |
| GNG4        | 1q42.3   | -0.09393 | 0.066669 | 0.127585 |
| BRINP3      | 1q31.1   | -0.09393 | 0.066683 | 0.127601 |
| CLUU1       | 12q22    | -0.09392 | 0.066713 | 0.127645 |
| COL9A1      | 6q13     | -0.0939  | 0.06676  | 0.127719 |
| C10ORF82    | 10q25.3  | -0.0939  | 0.066768 | 0.127719 |
| DNAJB13     | 11q13.4  | 0.093896 | 0.066771 | 0.127719 |
| COA7        | 1p32.3   | 0.093893 | 0.06678  | 0.127724 |
| MIER3       | 5q11.2   | -0.09386 | 0.066879 | 0.127902 |
| FAM192A     | 16q13    | 0.09383  | 0.066963 | 0.128051 |
| RIMBP2      | 12q24.33 | -0.0938  | 0.067063 | 0.128218 |
| ISCA2       | 14q24.3  | -0.0938  | 0.067064 | 0.128218 |
| PPARG       | 3p25.2   | -0.09377 | 0.06713  | 0.128333 |
| ARHGAP30    | 1q23.3   | -0.09375 | 0.067195 | 0.128444 |
| PRRG3       | Xq28     | -0.09374 | 0.067228 | 0.128489 |
| UBR1        | 15q15.2  | -0.09374 | 0.067231 | 0.128489 |
| WDR91       | 7q33     | -0.09373 | 0.067246 | 0.128504 |
| PSG11       | 19q13.31 | -0.09373 | 0.067252 | 0.128504 |
| AVPI1       | 10q24.2  | 0.093721 | 0.067282 | 0.128549 |
| MBP         | 18q23    | -0.09371 | 0.067308 | 0.128587 |
| CDV3        | 3q22.1   | 0.093669 | 0.067434 | 0.128816 |
| EED         | 11q14.2  | 0.093658 | 0.067468 | 0.128869 |
| KLK3        | 19q13.33 | -0.09365 | 0.067484 | 0.128886 |
| SALL3       | 18q23    | -0.09364 | 0.067507 | 0.128919 |
| FAM182A     | 20p11.1  | -0.0936  | 0.067637 | 0.129154 |
| SNORD116-4  | 15q11.2  | -0.0936  | 0.067652 | 0.129158 |
| NAT14       | 19q13.42 | -0.0936  | 0.067652 | 0.129158 |
| PPM1E       | 17q22    | -0.09359 | 0.067674 | 0.129188 |
| PTPRCAP     | 11q13.2  | -0.09358 | 0.067696 | 0.129217 |
| GUCY1A2     | 11q22.3  | -0.09357 | 0.067714 | 0.129239 |
| ETV7        | 6p21.31  | 0.09357  | 0.067727 | 0.129245 |
| METTL27     | 7q11.23  | -0.09357 | 0.06773  | 0.129245 |

|            |          |          |          |          |
|------------|----------|----------|----------|----------|
| AMMECR1L   | 2q14.3   | -0.09356 | 0.067759 | 0.129289 |
| TPTE2P6    | 13q12.12 | -0.09355 | 0.067784 | 0.129324 |
| KRT35      | 17q21.2  | -0.09354 | 0.067826 | 0.129384 |
| MAGEA2     | Xq28     | -0.09354 | 0.067829 | 0.129384 |
| KRTAP10-12 | 21q22.3  | 0.093533 | 0.067836 | 0.129384 |
| PIGL       | 17p11.2  | 0.093531 | 0.067841 | 0.129384 |
| TMEM102    | 17p13.1  | -0.09351 | 0.067893 | 0.129471 |
| RAPGEF3    | 12q13.11 | 0.093507 | 0.067911 | 0.129492 |
| NPC1L1     | 7p13     | -0.0935  | 0.067928 | 0.129513 |
| CXORF66    | Xq27.1   | -0.0935  | 0.067943 | 0.129518 |
| FLJ23867   | 1q25.2   | 0.093496 | 0.067944 | 0.129518 |
| UGT3A2     | 5p13.2   | -0.09349 | 0.067964 | 0.129543 |
| GALNT6     | 12q13.13 | -0.09349 | 0.067972 | 0.129547 |
| TMEM260    | 14q22.3  | -0.09348 | 0.067999 | 0.129586 |
| IFIH1      | 2q24.2   | -0.09344 | 0.068119 | 0.129802 |
| MZT2B      | 2q21.1   | 0.093427 | 0.068148 | 0.129845 |
| LINC01622  | 6p25.3   | -0.0934  | 0.068223 | 0.129976 |
| CARD9      | 9q34.3   | -0.09335 | 0.068367 | 0.130232 |
| WDR63      | 1p22.3   | -0.09335 | 0.06837  | 0.130232 |
| SPTBN2     | 11q13.2  | 0.093333 | 0.068428 | 0.130328 |
| ATG4A      | Xq22.3   | -0.09333 | 0.068439 | 0.130336 |
| ACAP2      | 3q29     | -0.09332 | 0.06846  | 0.130364 |
| NIPA1      | 15q11.2  | 0.093317 | 0.068476 | 0.130382 |
| HSPA6      | 1q23.3   | 0.09331  | 0.068497 | 0.13041  |
| NSA2       | 5q13.3   | -0.09331 | 0.068506 | 0.130416 |
| TLE4       | 9q21.31  | -0.0933  | 0.068522 | 0.130426 |
| ROPN1B     | 3q21.2   | 0.093301 | 0.068525 | 0.130426 |
| SPATA31C1  | 9q22.1   | -0.09326 | 0.068643 | 0.130639 |
| RPS13      | 11p15.1  | -0.09325 | 0.068685 | 0.130706 |
| PDCL       | 9q33.2   | -0.09324 | 0.068707 | 0.130735 |
| MYLPF      | 16p11.2  | -0.09321 | 0.068783 | 0.130869 |
| UCN2       | 3p21.31  | 0.093211 | 0.068793 | 0.130874 |
| COL4A1     | 13q34    | -0.09321 | 0.068803 | 0.130876 |
| TCF12      | 15q21.3  | -0.09321 | 0.068807 | 0.130876 |
| EEF1B2     | 2q33.3   | -0.0932  | 0.068816 | 0.130881 |
| NEB        | 2q23.3   | -0.0932  | 0.068837 | 0.130909 |
| ACOT12     | 5q14.1   | 0.093185 | 0.068868 | 0.130955 |
| RAP2A      | 13q32.1  | -0.09317 | 0.068917 | 0.131036 |
| KRT86      | 12q13.13 | -0.09316 | 0.068942 | 0.131071 |
| ZNF185     | Xq28     | -0.09315 | 0.068979 | 0.131121 |
| DUT        | 15q21.1  | 0.093148 | 0.068981 | 0.131121 |
| KLB        | 4p14     | -0.09314 | 0.06899  | 0.131126 |
| CLTRN      | Xp22.2   | -0.09311 | 0.069083 | 0.131283 |
| UBE2I      | 16p13.3  | 0.093112 | 0.069087 | 0.131283 |
| DTHD1      | 4p14     | -0.09311 | 0.069093 | 0.131284 |
| ZNF782     | 9q22.33  | 0.093067 | 0.069223 | 0.131519 |
| TLK2       | 17q23.2  | -0.09306 | 0.069231 | 0.13152  |
| FZD6       | 8q22.3   | -0.09306 | 0.069242 | 0.131529 |
| TM7SF2     | 11q13.1  | -0.09305 | 0.069262 | 0.131555 |
| GSTO1      | 10q25.1  | -0.09304 | 0.069317 | 0.131646 |
| SLC4A9     | 5q31.3   | 0.093032 | 0.069329 | 0.131656 |
| OAT        | 10q26.13 | -0.09299 | 0.069448 | 0.13187  |
| NKAP       | Xq24     | -0.09299 | 0.069459 | 0.131879 |
| RPS8       | 1p34.1   | -0.09298 | 0.069476 | 0.131898 |
| MYO3B      | 2q31.1   | -0.09296 | 0.069543 | 0.132013 |
| ZEB1-AS1   | 10p11.22 | -0.09293 | 0.06963  | 0.132166 |
| LOXL3      | 2p13.1   | -0.09292 | 0.06966  | 0.132211 |
| IDO1       | 8p11.21  | -0.09291 | 0.069693 | 0.132261 |

|           |                 |          |          |          |
|-----------|-----------------|----------|----------|----------|
| ANKRD12   | 18p11.22        | -0.0929  | 0.069722 | 0.132303 |
| CCL16     | 17q12           | -0.09285 | 0.069872 | 0.132574 |
| SLC22A5   | 5q31.1          | -0.09285 | 0.069892 | 0.1326   |
| NCBP2     | 3q29            | -0.09284 | 0.069902 | 0.132603 |
| KRTAP13-4 | 21q22.11        | -0.09284 | 0.069907 | 0.132603 |
| MMAA      | 4q31.21         | -0.09283 | 0.069936 | 0.132645 |
| TPM4      | 19p13.12-p13.11 | -0.09282 | 0.069955 | 0.13267  |
| DEFA5     | 8p23.1          | -0.09281 | 0.069998 | 0.132739 |
| GLIS1     | 1p32.3          | -0.09279 | 0.070053 | 0.13283  |
| OR1J1     | 9q33.2          | 0.092789 | 0.070063 | 0.132837 |
| ZNF431    | 19p12           | 0.092732 | 0.070236 | 0.133152 |
| RYR2      | 1q43            | -0.09272 | 0.070259 | 0.133184 |
| CIAO2B    | 16q22.1         | 0.092715 | 0.070286 | 0.133221 |
| SMPDL3B   | 1p35.3          | -0.0927  | 0.070333 | 0.133299 |
| CYP4F2    | 19p13.12        | -0.0927  | 0.070344 | 0.133306 |
| MTF1      | 1p34.3          | 0.092671 | 0.070421 | 0.133439 |
| UTP6      | 17q11.2         | 0.092663 | 0.070446 | 0.133474 |
| CDKN2AIP  | 4q35.1          | -0.09264 | 0.070502 | 0.133567 |
| DEF8      | 16q24.3         | 0.092635 | 0.070529 | 0.133607 |
| ACBD7     | 10p13           | 0.092609 | 0.070608 | 0.133744 |
| C16ORF91  | 16p13.3         | 0.092595 | 0.070652 | 0.133813 |
| RADIL     | 7p22.1          | -0.09255 | 0.070791 | 0.134065 |
| IL31      | 12q24.31        | -0.09252 | 0.070893 | 0.134245 |
| PDCD1     | 2q37.3          | -0.09249 | 0.070978 | 0.134383 |
| NEUROD2   | 17q12           | 0.092488 | 0.070979 | 0.134383 |
| SNORA72   | 8q22.2          | 0.09248  | 0.071005 | 0.134419 |
| DDX19A    | 16q22.1         | 0.092464 | 0.071052 | 0.134495 |
| SFXN4     | 10q26.11        | 0.092454 | 0.071083 | 0.13454  |
| LIPI      | 21q11.2         | 0.092451 | 0.071094 | 0.134549 |
| FARS2     | 6p25.1          | 0.092444 | 0.071113 | 0.134572 |
| GLB1L2    | 11q25           | 0.092442 | 0.071112 | 0.134573 |
| NLGN2     | 17p13.1         | -0.09244 | 0.071135 | 0.134579 |
| OSER1     | 20q13.12        | -0.09243 | 0.071143 | 0.134579 |
| TMEM64    | 8q21.3          | -0.09243 | 0.071143 | 0.134579 |
| POLR3C    | 1q21.1          | 0.092428 | 0.071163 | 0.134604 |
| SRP9      | 1q42.12         | 0.092415 | 0.071203 | 0.13466  |
| EPB41L4B  | 9q31.3          | -0.09241 | 0.071213 | 0.13466  |
| TAC3      | 12q13.3         | 0.09241  | 0.071219 | 0.13466  |
| PIK3CD    | 1p36.22         | -0.09241 | 0.071223 | 0.13466  |
| GPR158    | 10p12.1         | -0.09241 | 0.071226 | 0.13466  |
| RAB32     | 6q24.3          | -0.0924  | 0.071246 | 0.134685 |
| HSP90AB4P | 15q21.3         | 0.092374 | 0.071328 | 0.134827 |
| SERPINC1  | 1q25.1          | 0.092366 | 0.071353 | 0.13485  |
| EID2      | 19q13.2         | -0.09236 | 0.071368 | 0.13485  |
| RPP38     | 10p13           | 0.092361 | 0.071368 | 0.13485  |
| GRK4      | 4p16.3          | -0.09236 | 0.071374 | 0.13485  |
| HNRNPK    | 9q21.32         | 0.092359 | 0.071374 | 0.13485  |
| FAM241A   | 4q25            | -0.09235 | 0.071416 | 0.134906 |
| RSU1P2    | 10q11.21        | 0.092346 | 0.071417 | 0.134906 |
| ZNF684    | 1p34.2          | -0.09232 | 0.071482 | 0.135016 |
| CNOT7     | 8p22            | -0.0923  | 0.071567 | 0.135163 |
| UCP2      | 11q13.4         | -0.09229 | 0.071592 | 0.135198 |
| ATM       | 11q22.3         | -0.09228 | 0.071614 | 0.135226 |
| KLHL20    | 1q25.1          | -0.09226 | 0.07167  | 0.13532  |
| E2F6      | 2p25.1          | -0.09226 | 0.071684 | 0.135333 |
| YJU2      | 19p13.3         | 0.09225  | 0.071712 | 0.135373 |
| MROH2B    | 5p13.1          | -0.09223 | 0.071783 | 0.135494 |
| ITSN2     | 2p23.3          | -0.09221 | 0.071832 | 0.135575 |

|           |               |          |          |          |
|-----------|---------------|----------|----------|----------|
| USP14     | 18p11.32      | 0.092191 | 0.071895 | 0.13568  |
| ZNF738    | 19p12         | 0.092186 | 0.071909 | 0.135694 |
| NLRP4     | 19q13.43      | -0.09214 | 0.072038 | 0.135924 |
| OR6C4     | 12q13.2       | -0.09214 | 0.07205  | 0.135927 |
| LOC728613 | 5p15.33       | -0.09214 | 0.072053 | 0.135927 |
| MIEF1     | 22q13.1       | 0.092137 | 0.072061 | 0.13593  |
| FAM50A    | Xq28          | 0.092097 | 0.072187 | 0.136155 |
| TMEM92    | 17q21.33      | 0.092085 | 0.072225 | 0.136203 |
| RBP3      | 10q11.22      | 0.092083 | 0.072229 | 0.136203 |
| ANGPTL3   | 1p31.3        | 0.092082 | 0.072233 | 0.136203 |
| CD300E    | 17q25.1       | -0.09207 | 0.072263 | 0.136247 |
| MIMT1     | 19q13.43      | -0.09206 | 0.072286 | 0.136273 |
| ACSL3     | 2q36.1        | 0.092063 | 0.07229  | 0.136273 |
| NECTIN2   | 19q13.32      | 0.092055 | 0.072316 | 0.136308 |
| C6ORF203  | 6q21          | 0.092045 | 0.072347 | 0.136354 |
| RANGRF    | 17p13.1       | -0.09203 | 0.072388 | 0.136407 |
| AMDHD2    | 16p13.3       | -0.09203 | 0.072389 | 0.136407 |
| CASR      | 3q13.33-q21.1 | -0.09203 | 0.0724   | 0.136414 |
| BORCS8    | 19p13.11      | 0.091984 | 0.072538 | 0.136662 |
| FNIP1     | 5q31.1        | -0.09197 | 0.072571 | 0.136712 |
| C16ORF71  | 16p13.3       | -0.09197 | 0.072582 | 0.136719 |
| AP3S1     | 5q22.3-q23.1  | -0.09197 | 0.072595 | 0.136731 |
| MMGT1     | Xq26.3        | -0.09195 | 0.072646 | 0.136814 |
| NT5C      | 17q25.1       | 0.09194  | 0.072676 | 0.136857 |
| FAM199X   | Xq22.2        | 0.091936 | 0.072689 | 0.13687  |
| EIF3CL    | 16p12.1       | 0.091926 | 0.072719 | 0.136914 |
| GFRA3     | 5q31.2        | -0.09191 | 0.07276  | 0.136969 |
| COX18     | 4q13.3        | -0.09191 | 0.072762 | 0.136969 |
| MCCC2     | 5q13.2        | 0.091908 | 0.072777 | 0.136983 |
| LCN12     | 9q34.3        | 0.091901 | 0.072797 | 0.137009 |
| PAK1      | 11q13.5-q14.1 | -0.0919  | 0.07281  | 0.13702  |
| MYLK2     | 20q11.21      | 0.091894 | 0.072819 | 0.137023 |
| SPANXB1   | Xq27.1        | -0.09188 | 0.072856 | 0.137081 |
| FAM184A   | 6q22.31       | -0.09187 | 0.072896 | 0.137136 |
| OAS1      | 12q24.13      | -0.09187 | 0.072899 | 0.137136 |
| GPANK1    | 6p21.33       | -0.09186 | 0.072931 | 0.137183 |
| NUBP2     | 16p13.3       | 0.091834 | 0.073006 | 0.137311 |
| FAHD2CP   | 2q11.2        | -0.09183 | 0.073018 | 0.137321 |
| TM4SF5    | 17p13.2       | -0.09183 | 0.073034 | 0.137339 |
| RPL31     | 2q11.2        | -0.09182 | 0.073057 | 0.137369 |
| PPCDC     | 15q24.2       | 0.091796 | 0.073127 | 0.137487 |
| LINC01547 | 21q22.3       | -0.09179 | 0.073146 | 0.137511 |
| IL6R      | 1q21.3        | -0.09178 | 0.073169 | 0.137529 |
| PI4K2A    | 10q24.2       | -0.09178 | 0.073175 | 0.137529 |
| VRK2      | 2p16.1        | -0.09178 | 0.073177 | 0.137529 |
| TRIML2    | 4q35.2        | -0.09176 | 0.073254 | 0.137659 |
| MARCKSL1  | 1p35.1        | -0.09175 | 0.073259 | 0.137659 |
| RHEB      | 7q36.1        | -0.09174 | 0.073295 | 0.137713 |
| CBY1      | 22q13.1       | -0.09173 | 0.073326 | 0.137753 |
| C6ORF163  | 6q15          | 0.091731 | 0.073331 | 0.137753 |
| ZPBP      | 7p12.2        | -0.09173 | 0.073348 | 0.137753 |
| TUT4      | 1p32.3        | -0.09173 | 0.073348 | 0.137753 |
| ZNF679    | 7q11.21       | -0.09172 | 0.073351 | 0.137753 |
| ATP9B     | 18q23         | -0.09172 | 0.073359 | 0.137755 |
| AUH       | 9q22.31       | -0.0917  | 0.073419 | 0.137856 |
| HSPA1L    | 6p21.33       | -0.0917  | 0.073431 | 0.137864 |
| RARRES1   | 3q25.32       | -0.09167 | 0.073509 | 0.137999 |
| DUSP18    | 22q12.2       | -0.09166 | 0.073567 | 0.138095 |

|              |               |          |          |          |
|--------------|---------------|----------|----------|----------|
| HDDC2        | 6q22.31       | -0.09165 | 0.073591 | 0.138126 |
| KNG1         | 3q27.3        | -0.09161 | 0.073707 | 0.138331 |
| KLHL29       | 2p24.1        | -0.0916  | 0.073744 | 0.138387 |
| DCANP1       | 5q31.1        | -0.09158 | 0.073812 | 0.138503 |
| LTBP4        | 19q13.2       | 0.091563 | 0.07386  | 0.138572 |
| RPEL1        | 10q24.33      | 0.091562 | 0.073863 | 0.138572 |
| BTBD8        | 1p22.1        | -0.09153 | 0.073955 | 0.138732 |
| RILPL1       | 12q24.31      | -0.09152 | 0.073993 | 0.138789 |
| DUSP9        | Xq28          | 0.091507 | 0.07404  | 0.138865 |
| TBX10        | 11q13.2       | -0.09149 | 0.074085 | 0.138929 |
| MYO3A        | 10p12.1       | -0.09149 | 0.074088 | 0.138929 |
| ENDOV        | 17q25.3       | -0.09144 | 0.074245 | 0.13921  |
| CD8A         | 2p11.2        | -0.09142 | 0.074314 | 0.139327 |
| CCDC42       | 17p13.1       | -0.09141 | 0.074362 | 0.139403 |
| HOXA11       | 7p15.2        | 0.0914   | 0.074379 | 0.139421 |
| STAG3        | 7q22.1        | -0.09139 | 0.074403 | 0.139455 |
| VN1R1        | 19q13.43      | 0.091379 | 0.074445 | 0.139519 |
| ZNF433       | 19p13.2       | -0.09137 | 0.074467 | 0.139548 |
| PIP5K1A      | 1q21.3        | 0.091362 | 0.0745   | 0.139596 |
| ZNF350       | 19q13.41      | -0.09134 | 0.074555 | 0.139679 |
| ATP1A1-AS1   | 1p13.1        | -0.09134 | 0.074558 | 0.139679 |
| PRR3         | 6p21.33       | 0.091324 | 0.074622 | 0.139787 |
| UBN1         | 16p13.3       | 0.09131  | 0.074665 | 0.139853 |
| CSNK1A1      | 5q32          | -0.0913  | 0.074697 | 0.139901 |
| LINC00696    | 3p21.2        | 0.091272 | 0.074786 | 0.140055 |
| OR10J3       | 1q23.2        | -0.09122 | 0.074969 | 0.140383 |
| LHFPL2       | 5q14.1        | -0.0912  | 0.075028 | 0.140481 |
| SNORA52      | 11p15.5       | 0.091177 | 0.075092 | 0.140587 |
| PPP1R14B     | 11q13.1       | 0.091099 | 0.075341 | 0.141041 |
| AGRN         | 1p36.33       | 0.091085 | 0.075387 | 0.141113 |
| SH2D4A       | 8p21.3        | 0.091068 | 0.075441 | 0.141201 |
| MAP10        | 1q42.2        | -0.09106 | 0.075483 | 0.141267 |
| GRM5         | 11q14.2-q14.3 | -0.09103 | 0.075559 | 0.141396 |
| OR2A4        | 6q23.2        | 0.091026 | 0.075577 | 0.141416 |
| NDEL1        | 17p13.1       | -0.09098 | 0.075724 | 0.141677 |
| CNN2         | 19p13.3       | 0.090978 | 0.07573  | 0.141677 |
| LOC100271832 | 2p22.3        | 0.090974 | 0.075744 | 0.141689 |
| B3GLCT       | 13q12.3       | -0.09096 | 0.075795 | 0.141772 |
| C1ORF174     | 1p36.32       | 0.090941 | 0.075852 | 0.141865 |
| FAM182B      | 20p11.1       | -0.09092 | 0.075924 | 0.141984 |
| NR6A1        | 9q33.3        | 0.090915 | 0.075937 | 0.141984 |
| APOH         | 17q24.2       | -0.09091 | 0.07594  | 0.141984 |
| B4GALT4      | 3q13.32       | -0.09091 | 0.075944 | 0.141984 |
| HMG20A       | 15q24.3       | -0.09089 | 0.076002 | 0.142079 |
| ZMYM1        | 1p34.3        | 0.090888 | 0.076024 | 0.142108 |
| CPLX4        | 18q21.32      | -0.09087 | 0.076073 | 0.142184 |
| TBC1D3C      | 17q12         | 0.090862 | 0.076108 | 0.142238 |
| ZNF418       | 19q13.43      | -0.09085 | 0.076145 | 0.142293 |
| LRRC20       | 10q22.1       | 0.090835 | 0.076196 | 0.142374 |
| CYP2C9       | 10q23.33      | 0.090831 | 0.076209 | 0.142386 |
| ATP13A3      | 3q29          | 0.090828 | 0.076217 | 0.142387 |
| LENEP        | 1q21.3        | 0.090797 | 0.076319 | 0.142565 |
| KATNA1       | 6q25.1        | 0.090787 | 0.076351 | 0.142612 |
| MNAT1        | 14q23.1       | -0.09078 | 0.076381 | 0.142654 |
| LRRN4        | 20p12.3       | -0.09077 | 0.076391 | 0.14266  |
| DGCR6L       | 22q11.21      | -0.09075 | 0.076476 | 0.142804 |
| NBPF10       | 1q21.1        | 0.090725 | 0.076553 | 0.142936 |
| PEG10        | 7q21.3        | -0.09072 | 0.076571 | 0.142956 |



|           |            |          |          |          |
|-----------|------------|----------|----------|----------|
| UQCRH     | 1p33       | 0.090695 | 0.07665  | 0.143089 |
| TRIM56    | 7q22.1     | 0.090664 | 0.076751 | 0.143265 |
| KLHL33    | 14q11.2    | 0.090658 | 0.076771 | 0.143289 |
| KRBOX4    | Xp11.3     | -0.09063 | 0.07685  | 0.143424 |
| IQUB      | 7q31.32    | -0.09063 | 0.076868 | 0.143443 |
| RETNLB    | 3q13.13    | -0.09061 | 0.076916 | 0.143515 |
| FAR2P1    | 2q21.1     | -0.09061 | 0.07692  | 0.143515 |
| PUS7L     | 12q12      | 0.090594 | 0.07698  | 0.143613 |
| CLCN6     | 1p36.22    | 0.090579 | 0.07703  | 0.143683 |
| MIS18BP1  | 14q21.2    | 0.090578 | 0.077032 | 0.143683 |
| CHMP4A    | 14q12      | -0.09057 | 0.077045 | 0.143694 |
| CHRM1     | 11q12.3    | 0.090565 | 0.077077 | 0.14374  |
| CES5A     | 16q12.2    | -0.09056 | 0.077107 | 0.143783 |
| LOC148709 | 1q32.1     | 0.090552 | 0.07712  | 0.143793 |
| NCOR1P1   | 20p11.1    | -0.09053 | 0.077191 | 0.143906 |
| NTSR2     | 2p25.1     | 0.090528 | 0.077199 | 0.143906 |
| TMEM63C   | 14q24.3    | -0.09053 | 0.077203 | 0.143906 |
| ARMC12    | 6p21.31    | 0.090521 | 0.077219 | 0.143906 |
| PHTF1     | 1p13.2     | -0.09052 | 0.077219 | 0.143906 |
| PSD4      | 2q14.1     | 0.09052  | 0.077224 | 0.143906 |
| P2RX1     | 17p13.2    | -0.0905  | 0.077277 | 0.143993 |
| PLAGL2    | 20q11.21   | -0.0905  | 0.077304 | 0.144021 |
| MYT1L     | 2p25.3     | -0.09049 | 0.077309 | 0.144021 |
| SLC6A1    | 3p25.3     | -0.09049 | 0.077314 | 0.144021 |
| CASP8     | 2q33.1     | -0.09048 | 0.077362 | 0.144085 |
| PELP1     | 17p13.2    | 0.090478 | 0.077363 | 0.144085 |
| SH3BGRL2  | 6q14.1     | -0.09047 | 0.07738  | 0.144092 |
| NPRL2     | 3p21.31    | 0.090472 | 0.077381 | 0.144092 |
| MSI2      | 17q22      | 0.090455 | 0.077437 | 0.144182 |
| SYP       | Xp11.23    | -0.09044 | 0.077496 | 0.14428  |
| CAPN1     | 11q13.1    | 0.090434 | 0.077506 | 0.144285 |
| TMEM51    | 1p36.21    | -0.09041 | 0.077573 | 0.144395 |
| LINC00205 | 21q22.3    | 0.090386 | 0.077666 | 0.144555 |
| SH2D6     | 2p11.2     | 0.090378 | 0.077692 | 0.144591 |
| MAEA      | 4p16.3     | 0.09036  | 0.077751 | 0.144687 |
| EYS       | 6q12       | -0.09035 | 0.077796 | 0.144758 |
| MAPT-AS1  | 17q21.31   | 0.090323 | 0.077871 | 0.144884 |
| CMTM8     | 3p22.3     | -0.09029 | 0.077977 | 0.145067 |
| UNCX      | 7p22.3     | 0.09028  | 0.078013 | 0.145121 |
| KRT25     | 17q21.2    | -0.09026 | 0.078072 | 0.145216 |
| OR5E1P    | 11p15.4    | 0.090233 | 0.07817  | 0.145385 |
| CCK       | 3p22.1     | 0.090212 | 0.078238 | 0.145499 |
| SLC6A17   | 1p13.3     | -0.09021 | 0.078257 | 0.14552  |
| BMPR1A    | 10q23.2    | -0.0902  | 0.078283 | 0.145554 |
| C1ORF198  | 1q42.2     | 0.090189 | 0.078318 | 0.145595 |
| ASPHD2    | 22q12.1    | 0.090188 | 0.078319 | 0.145595 |
| PXK       | 3p14.3     | -0.09018 | 0.078341 | 0.145622 |
| DMAC1     | 9p24.1     | -0.09018 | 0.078348 | 0.145622 |
| SOWAHA    | 5q31.1     | -0.09015 | 0.078461 | 0.145819 |
| DAB1      | 1p32.2     | -0.09013 | 0.078508 | 0.145892 |
| ACBD3     | 1q42.12    | 0.090124 | 0.078531 | 0.145922 |
| CEP83-DT  | 12q22      | 0.090119 | 0.078548 | 0.145939 |
| PSMC4     | 19q13.2    | 0.090112 | 0.078574 | 0.145974 |
| MUC20     | 3q29       | -0.0901  | 0.078619 | 0.146044 |
| EDARADD   | 1q42.3-q43 | -0.09008 | 0.078682 | 0.146148 |
| FAM162B   | 6q22.1     | -0.09006 | 0.078748 | 0.146256 |
| SLC35G6   | 17p13.1    | 0.090057 | 0.078756 | 0.146259 |
| VPS37A    | 8p22       | -0.09004 | 0.078829 | 0.146379 |

|           |              |          |          |          |
|-----------|--------------|----------|----------|----------|
| ANKRD30BL | 2q21.2       | 0.09003  | 0.078846 | 0.146398 |
| MIAT      | 22q12.1      | 0.090027 | 0.078857 | 0.146405 |
| EN2       | 7q36.3       | 0.090011 | 0.07891  | 0.146489 |
| TPO       | 2p25.3       | -0.09001 | 0.078928 | 0.146509 |
| FBLL1     | 5q34         | -0.08999 | 0.078978 | 0.146589 |
| FAM157A   | 3q29         | 0.089953 | 0.079103 | 0.146807 |
| TMEM70    | 8q21.11      | -0.08994 | 0.079131 | 0.146846 |
| TEAD3     | 6p21.31      | 0.089928 | 0.079188 | 0.146937 |
| VPS72     | 1q21.3       | 0.089913 | 0.079235 | 0.147012 |
| RCAN1     | 21q22.12     | -0.08989 | 0.07931  | 0.147138 |
| TTBK2     | 15q15.2      | -0.08988 | 0.079339 | 0.147177 |
| TSC22D2   | 3q25.1       | -0.08988 | 0.079349 | 0.147183 |
| TEKT2     | 1p34.3       | -0.08985 | 0.079453 | 0.147361 |
| TSPO2     | 6p21.1       | 0.089842 | 0.079474 | 0.147386 |
| SNPH      | 20p13        | -0.08983 | 0.079532 | 0.147471 |
| IER2      | 19p13.13     | 0.089824 | 0.079535 | 0.147471 |
| FAM151A   | -            | 0.089796 | 0.07963  | 0.147634 |
| ALG5      | 13q13.3      | -0.08978 | 0.079668 | 0.147691 |
| TMEM170A  | 16q23.1      | 0.089777 | 0.079695 | 0.147728 |
| FAM98B    | 15q14        | 0.089763 | 0.07974  | 0.147797 |
| PAQR3     | 4q21.21      | -0.08976 | 0.079766 | 0.147831 |
| OR51T1    | 11p15.4      | -0.08975 | 0.07978  | 0.147844 |
| OSBPL11   | 3q21.2       | -0.08973 | 0.079841 | 0.147944 |
| AXIN2     | 17q24.1      | -0.08971 | 0.079915 | 0.148068 |
| STAT4     | 2q32.2-q32.3 | -0.0897  | 0.07994  | 0.14809  |
| PGM3      | 6q14.1       | 0.089703 | 0.079942 | 0.14809  |
| SYT10     | 12p11.1      | -0.08969 | 0.080004 | 0.148191 |
| TAAR6     | 6q23.2       | -0.08968 | 0.080018 | 0.148203 |
| ROR1      | 1p31.3       | -0.08967 | 0.080041 | 0.148232 |
| CLMN      | 14q32.13     | 0.089668 | 0.08006  | 0.148253 |
| TMEM14B   | 6p24.2       | -0.08966 | 0.080077 | 0.148272 |
| EEA1      | 12q22        | -0.08963 | 0.080189 | 0.148464 |
| PPM1B     | 2p21         | -0.08956 | 0.08044  | 0.148915 |
| SNORD10   | 17p13.1      | 0.089536 | 0.080507 | 0.149026 |
| TTC26     | 7q34         | 0.089522 | 0.080556 | 0.149103 |
| POC5      | 5q13.3       | 0.089495 | 0.080647 | 0.149257 |
| EIF2AK2   | 2p22.2       | 0.089489 | 0.080667 | 0.149281 |
| ZFAND3    | 6p21.2       | -0.08949 | 0.080674 | 0.149281 |
| CIB1      | 15q26.1      | 0.089471 | 0.080729 | 0.149367 |
| LRRIQ4    | 3q26.2       | 0.089441 | 0.08083  | 0.149541 |
| RASGRP1   | 15q14        | -0.08942 | 0.080905 | 0.149665 |
| LINC02347 | 12q24.32     | 0.089389 | 0.081009 | 0.149845 |
| IFNB1     | 9p21.3       | 0.089384 | 0.081027 | 0.149864 |
| MAPT      | 17q21.31     | -0.08938 | 0.081036 | 0.149866 |
| SERPINB9  | 6p25.2       | 0.089378 | 0.081046 | 0.149872 |
| ZDHHC16   | 10q24.1      | 0.089376 | 0.081054 | 0.149872 |
| TNNT3     | 11p15.5      | -0.08934 | 0.081179 | 0.15009  |
| CNTFR-AS1 | 9p13.3       | 0.089327 | 0.081221 | 0.150153 |
| MROH9     | 1q24.3       | -0.0893  | 0.081319 | 0.150321 |
| ZSCAN22   | 19q13.43     | 0.089279 | 0.081386 | 0.15043  |
| SMAD2     | 18q21.1      | -0.08925 | 0.081476 | 0.150583 |
| SQSTM1    | 5q35.3       | -0.08923 | 0.081547 | 0.150693 |
| GAL3ST1   | 22q12.2      | 0.089231 | 0.08155  | 0.150693 |
| DST       | 6p12.1       | -0.08922 | 0.081578 | 0.150729 |
| CRABP2    | 1q23.1       | -0.08922 | 0.081603 | 0.150762 |
| ZNF83     | 19q13.41     | 0.089196 | 0.081668 | 0.150869 |
| PEX7      | 6q23.3       | -0.08919 | 0.081687 | 0.15089  |
| PLD2      | 17p13.2      | -0.08919 | 0.081698 | 0.150892 |

|          |               |          |          |          |
|----------|---------------|----------|----------|----------|
| CXORF58  | Xp22.11       | -0.08919 | 0.081703 | 0.150892 |
| CISD2    | 4q24          | -0.08915 | 0.081826 | 0.151105 |
| NPR2     | 9p13.3        | -0.08915 | 0.081841 | 0.151118 |
| PTPRN2   | 7q36.3        | -0.08913 | 0.081891 | 0.151197 |
| PPM1L    | 3q25.33-q26.1 | -0.08912 | 0.081916 | 0.15123  |
| AP2B1    | 17q12         | 0.08912  | 0.081931 | 0.151243 |
| THNSL2   | 2p11.2        | -0.08911 | 0.081968 | 0.151284 |
| WIPF3    | 7p14.3        | -0.08911 | 0.081968 | 0.151284 |
| SPG7     | 16q24.3       | 0.089084 | 0.082056 | 0.151422 |
| CYP11B1  | 8q24.3        | 0.089083 | 0.082058 | 0.151422 |
| NUP42    | 7p15.3        | 0.089078 | 0.082077 | 0.151431 |
| TMEM67   | 8q22.1        | -0.08908 | 0.082079 | 0.151431 |
| CLBA1    | 14q32.33      | 0.089004 | 0.08233  | 0.151873 |
| RHBDL2   | 1p34.3        | 0.089004 | 0.082333 | 0.151873 |
| EMC1     | 1p36.13       | 0.088997 | 0.082356 | 0.151894 |
| TAS2R1   | 5p15.31       | -0.089   | 0.08236  | 0.151894 |
| MRM3     | 17p13.3       | 0.08899  | 0.082379 | 0.151916 |
| NUMBL    | 19q13.2       | -0.08898 | 0.082414 | 0.151967 |
| FAM25A   | 10q23.2       | 0.088962 | 0.082476 | 0.152067 |
| PRSS53   | 16p11.2       | 0.088956 | 0.082497 | 0.152091 |
| UNC79    | 14q32.12      | -0.08894 | 0.082548 | 0.152159 |
| OR2L3    | 1q44          | -0.08894 | 0.082549 | 0.152159 |
| SCARNA15 | 15q25.2       | 0.088915 | 0.082638 | 0.152309 |
| OR911    | 11q12.1       | 0.088907 | 0.082668 | 0.15234  |
| PRKCG    | 19q13.42      | 0.088906 | 0.08267  | 0.15234  |
| EEPD1    | 7p14.2        | -0.08889 | 0.082715 | 0.152409 |
| STK17B   | 2q32.3        | -0.08888 | 0.082746 | 0.152451 |
| RASA2    | 3q23          | 0.088882 | 0.082755 | 0.152454 |
| OCM2     | 7q21.3        | 0.088878 | 0.082767 | 0.152463 |
| FKBP9P1  | 7p11.2        | -0.08886 | 0.082827 | 0.152559 |
| ZNF16    | 8q24.3        | -0.08884 | 0.08291  | 0.152694 |
| ACOX3    | 4p16.1        | -0.08884 | 0.082915 | 0.152694 |
| GPR153   | 1p36.31       | -0.08883 | 0.082933 | 0.152712 |
| FAAH2    | Xp11.21       | -0.08881 | 0.083004 | 0.15283  |
| PLOD3    | 7q22.1        | 0.088796 | 0.083055 | 0.152908 |
| PANK4    | 1p36.32       | 0.088791 | 0.08307  | 0.152922 |
| VWA2     | 10q25.3       | -0.08879 | 0.083086 | 0.152934 |
| GATB     | 4q31.3        | -0.08879 | 0.083091 | 0.152934 |
| CEP76    | 18p11.21      | 0.088778 | 0.083115 | 0.152964 |
| C3P1     | 19p13.2       | 0.088755 | 0.083197 | 0.153099 |
| STAM     | 10p12.33      | 0.088751 | 0.083211 | 0.153112 |
| TPMT     | 6p22.3        | 0.088747 | 0.083225 | 0.153123 |
| TMC5     | 16p12.3       | 0.088719 | 0.083321 | 0.153276 |
| VPS37C   | 11q12.2       | 0.088718 | 0.083323 | 0.153276 |
| AGK      | 7q34          | 0.088695 | 0.083406 | 0.153414 |
| GLDC     | 9p24.1        | -0.08868 | 0.083455 | 0.15349  |
| TRAK1    | 3p22.1        | 0.088663 | 0.083518 | 0.153592 |
| LILRB3   | 19q13.42      | -0.08864 | 0.083601 | 0.15373  |
| PREP     | 6q21          | 0.088635 | 0.083615 | 0.153734 |
| HPD      | 12q24.31      | -0.08863 | 0.083619 | 0.153734 |
| C1ORF194 | 1p13.3        | 0.088632 | 0.083626 | 0.153734 |
| BAMBI    | 10p12.1       | -0.08861 | 0.083704 | 0.153864 |
| GTF2H3   | 12q24.31      | 0.088595 | 0.083755 | 0.153943 |
| CXCR3    | Xq13.1        | -0.08858 | 0.083825 | 0.15405  |
| INTS6    | 13q14.3       | 0.088572 | 0.083836 | 0.15405  |
| NLRP3    | 1q44          | -0.08857 | 0.083836 | 0.15405  |
| PHKA1    | Xq13.1        | 0.088552 | 0.083905 | 0.154162 |
| TMEM247  | 2p21          | -0.08854 | 0.083959 | 0.154247 |

|           |          |          |          |          |
|-----------|----------|----------|----------|----------|
| TCN1      | 11q12.1  | 0.088525 | 0.084001 | 0.15431  |
| FUNDC2P2  | 2p11.2   | -0.08852 | 0.084028 | 0.154346 |
| SNHG11    | 20q11.23 | -0.08851 | 0.084061 | 0.154377 |
| OTOP1     | 4p16.3   | 0.088507 | 0.084064 | 0.154377 |
| HMGXB4    | 22q12.3  | 0.088504 | 0.084075 | 0.154377 |
| PRAMEF10  | 1p36.21  | -0.0885  | 0.084076 | 0.154377 |
| ROCK1     | 18q11.1  | -0.08849 | 0.084136 | 0.154473 |
| VPS37B    | 12q24.31 | 0.08848  | 0.084161 | 0.154505 |
| NBPF3     | 1p36.12  | -0.08846 | 0.084213 | 0.154586 |
| NXF1      | 11q12.3  | 0.088449 | 0.084269 | 0.154664 |
| AATK      | 17q25.3  | 0.088448 | 0.084271 | 0.154664 |
| WDR82     | 3p21.2   | -0.08844 | 0.084287 | 0.154679 |
| NSDHL     | Xq28     | 0.088404 | 0.084429 | 0.154918 |
| TAF1B     | 2p25.1   | -0.0884  | 0.084432 | 0.154918 |
| ZNF184    | 6p22.1   | 0.088391 | 0.084471 | 0.154975 |
| IMPACT    | 18q11.2  | -0.08839 | 0.08449  | 0.154991 |
| AP1AR     | 4q25     | -0.08838 | 0.084495 | 0.154991 |
| DUSP23    | 1q23.2   | 0.08836  | 0.084584 | 0.155139 |
| RPS15A    | 16p12.3  | -0.08835 | 0.084612 | 0.155176 |
| COX6B2    | 19q13.42 | 0.088336 | 0.084669 | 0.155266 |
| SSBP2     | 5q14.1   | -0.08831 | 0.08475  | 0.1554   |
| CCZ1      | 7p22.1   | -0.0883  | 0.084802 | 0.155482 |
| TRUB1     | 10q25.3  | -0.08828 | 0.084849 | 0.155555 |
| BPIFA1    | 20q11.21 | -0.08828 | 0.084873 | 0.155584 |
| AQP12B    | 2q37.3   | 0.088272 | 0.084892 | 0.155604 |
| EXD1      | 15q15.1  | -0.08826 | 0.084922 | 0.155645 |
| MUC5B     | 11p15.5  | 0.088242 | 0.084999 | 0.155772 |
| GPR89B    | 1q21.2   | 0.088232 | 0.085034 | 0.155822 |
| TBP       | 6q27     | 0.088229 | 0.085047 | 0.155832 |
| KRTAP4-9  | 17q21.2  | 0.088221 | 0.085073 | 0.155865 |
| CRB3      | 19p13.3  | 0.088176 | 0.085236 | 0.156149 |
| LOC284009 | 17p13.3  | 0.088167 | 0.085267 | 0.156191 |
| IGFBP1    | 7p12.3   | -0.08815 | 0.085318 | 0.156271 |
| ARHGEF37  | 5q32     | -0.08814 | 0.085349 | 0.156307 |
| SRCIN1    | 17q12    | 0.088143 | 0.085353 | 0.156307 |
| RELCH     | 18q21.33 | 0.08814  | 0.085363 | 0.156311 |
| CYP4B1    | 1p33     | -0.08814 | 0.085375 | 0.156317 |
| ADAM30    | 1p12     | 0.088113 | 0.085459 | 0.156458 |
| PLEKHA2   | 8p11.22  | -0.08811 | 0.085485 | 0.156491 |
| UGT1A10   | 2q37.1   | -0.08809 | 0.085548 | 0.156588 |
| BRMS1     | 11q13.2  | 0.088084 | 0.085561 | 0.156588 |
| LAGE3     | Xq28     | 0.088084 | 0.085562 | 0.156588 |
| OR9K2     | 12q13.2  | 0.08808  | 0.085576 | 0.1566   |
| RPL29     | 3p21.2   | -0.08807 | 0.085606 | 0.156641 |
| OLFM3     | 1p21.1   | -0.08806 | 0.085633 | 0.156675 |
| ADHFE1    | 8q13.1   | -0.08804 | 0.085719 | 0.156796 |
| OR2Z1     | 19p13.2  | -0.08804 | 0.085722 | 0.156796 |
| OR2AK2    | 1q44     | 0.088039 | 0.085722 | 0.156796 |
| NLE1      | 17q12    | 0.088026 | 0.085768 | 0.156865 |
| NBPF4     | 1p13.3   | 0.088016 | 0.085806 | 0.156921 |
| FAM83F    | 22q13.1  | 0.088013 | 0.085817 | 0.156926 |
| ACTL7B    | 9q31.3   | 0.088004 | 0.085849 | 0.15697  |
| LOC392196 | 8p23.1   | -0.088   | 0.085857 | 0.156971 |
| LRRC47    | 1p36.32  | 0.087981 | 0.085932 | 0.157093 |
| BLVRA     | 7p13     | -0.08797 | 0.085967 | 0.157144 |
| B4GALT2   | 1p34.1   | 0.087944 | 0.086064 | 0.157305 |
| RMND1     | 6q25.1   | -0.08794 | 0.086083 | 0.157326 |
| HYAL3     | 3p21.31  | 0.087922 | 0.086141 | 0.157419 |

|           |              |          |          |          |
|-----------|--------------|----------|----------|----------|
| GLYAT     | 11q12.1      | -0.08792 | 0.086152 | 0.157424 |
| GFRAL     | 6p12.1       | -0.0879  | 0.086212 | 0.157513 |
| PCGF6     | 10q24.33     | 0.087901 | 0.086216 | 0.157513 |
| LYPLAL1   | 1q41         | -0.0879  | 0.086237 | 0.157537 |
| TMLHE     | Xq28         | -0.08788 | 0.086283 | 0.157588 |
| COX5B     | 2q11.2       | 0.087882 | 0.086286 | 0.157588 |
| EPX       | 17q22        | 0.087881 | 0.086289 | 0.157588 |
| SERGEF    | 11p15.1      | -0.08787 | 0.086317 | 0.157624 |
| C5ORF64   | 5q12.1       | -0.08786 | 0.086365 | 0.157698 |
| MZB1      | 5q31.2       | -0.08785 | 0.08641  | 0.157767 |
| CDKL3     | 5q31.1       | -0.0878  | 0.086582 | 0.158059 |
| ACBD5     | 10p12.1      | 0.087798 | 0.086586 | 0.158059 |
| ZGPAT     | 20q13.33     | 0.087787 | 0.086627 | 0.158119 |
| FAM151B   | 5q14.1       | -0.08778 | 0.086665 | 0.158174 |
| CRACR2A   | 12p13.32     | 0.08777  | 0.086689 | 0.158202 |
| NEU3      | 11q13.4      | 0.087756 | 0.086739 | 0.15828  |
| NBPF15    | 1q21.1       | 0.08775  | 0.086758 | 0.158301 |
| CHP2      | 16p12.2      | -0.08775 | 0.086773 | 0.158313 |
| RASA4CP   | 7p13         | 0.087738 | 0.086804 | 0.158351 |
| SNORD89   | 2q11.2       | 0.087736 | 0.086811 | 0.158351 |
| DCT       | 13q32.1      | -0.08773 | 0.086817 | 0.158351 |
| SDHAF1    | 19q13.12     | 0.087708 | 0.08691  | 0.158505 |
| ZNF250    | 8q24.3       | -0.08767 | 0.08706  | 0.158765 |
| OR51B2    | 11p15.4      | 0.087644 | 0.087144 | 0.158903 |
| CHGA      | 14q32.12     | -0.0876  | 0.087314 | 0.159198 |
| RGS8      | 1q25.3       | -0.08758 | 0.087359 | 0.159264 |
| LRRC75A   | 17p11.2      | -0.08758 | 0.087366 | 0.159264 |
| KRTAP21-2 | 21q22.11     | 0.087574 | 0.087395 | 0.159302 |
| LPAR2     | 19p13.11     | 0.08756  | 0.087447 | 0.15937  |
| CYP1A2    | 15q24.1      | -0.08756 | 0.087448 | 0.15937  |
| ATP6V0E2  | 7q36.1       | 0.087553 | 0.087474 | 0.159402 |
| RETSAT    | 2p11.2       | -0.08754 | 0.087517 | 0.159466 |
| RPL13AP3  | 14q22.3      | -0.08752 | 0.087575 | 0.159558 |
| GDPGP1    | 15q26.1      | 0.087517 | 0.087602 | 0.159593 |
| C17ORF102 | 17q12        | -0.08751 | 0.087615 | 0.159603 |
| LRRC37BP1 | 17q11.2      | -0.08751 | 0.087624 | 0.159605 |
| EMID1     | 22q12.2      | -0.0875  | 0.087652 | 0.15964  |
| GRSF1     | 4q13.3       | 0.087484 | 0.087723 | 0.159755 |
| BRD1      | 22q13.33     | 0.08748  | 0.087738 | 0.159769 |
| DDX6      | 11q23.3      | -0.08747 | 0.087763 | 0.159786 |
| C1ORF229  | 1q44         | 0.087473 | 0.087764 | 0.159786 |
| BCAR1     | 16q23.1      | 0.087449 | 0.087851 | 0.159929 |
| COMMD5    | 8q24.3       | -0.08745 | 0.087859 | 0.159929 |
| ZNF154    | 19q13.43     | -0.08744 | 0.087868 | 0.159929 |
| AHNAK2    | 14q32.33     | -0.08744 | 0.087874 | 0.159929 |
| LRRC37A   | 17q21.31     | 0.08744  | 0.087884 | 0.159932 |
| MAP2K6    | 17q24.3      | -0.08744 | 0.087901 | 0.159949 |
| RABGGTA   | 14q12        | 0.087422 | 0.087948 | 0.16002  |
| TCF7      | 5q31.1       | -0.0874  | 0.088021 | 0.160138 |
| MIF       | 22q11.23     | 0.08739  | 0.088067 | 0.160206 |
| ELFN1     | 7p22.3       | -0.08739 | 0.088077 | 0.16021  |
| ANKIB1    | 7q21.2       | -0.08738 | 0.088108 | 0.160253 |
| FMNL3     | 12q13.12     | -0.08737 | 0.088148 | 0.16031  |
| RNASE12   | 14q11.2      | 0.087364 | 0.08816  | 0.160318 |
| LIPK      | 10q23.31     | -0.08736 | 0.088175 | 0.16033  |
| ISYNA1    | 19p13.11     | -0.08735 | 0.088221 | 0.160399 |
| ISL2      | 15q24.3      | -0.08732 | 0.088336 | 0.160594 |
| ATAD2B    | 2p24.1-p23.3 | 0.087308 | 0.088367 | 0.160636 |

|            |          |          |          |          |
|------------|----------|----------|----------|----------|
| RMC1       | 18q11.2  | 0.0873   | 0.088394 | 0.160671 |
| SHC2       | 19p13.3  | -0.0873  | 0.088404 | 0.160673 |
| PRTFDC1    | 10p12.1  | 0.087289 | 0.088437 | 0.160719 |
| ANKRD45    | 1q25.1   | -0.08728 | 0.088466 | 0.160757 |
| KCNN2      | 5q22.3   | -0.08727 | 0.088507 | 0.160817 |
| MTDH       | 8q22.1   | -0.08726 | 0.08856  | 0.160895 |
| LANCL2     | 7p11.2   | -0.08725 | 0.088568 | 0.160895 |
| VWDE       | 7p21.3   | -0.08725 | 0.088574 | 0.160895 |
| PHAX       | 5q23.2   | -0.08724 | 0.088613 | 0.160951 |
| HS3ST3B1   | 17p12    | -0.08724 | 0.088622 | 0.160953 |
| OR14I1     | 1q44     | -0.08722 | 0.088677 | 0.161039 |
| NUDT18     | 8p21.3   | -0.0872  | 0.088755 | 0.161165 |
| TYMP       | 22q13.33 | -0.0872  | 0.088773 | 0.161175 |
| SLAIN2     | 4p11     | -0.08719 | 0.088783 | 0.161175 |
| PHF2P1     | 13q12.11 | 0.087194 | 0.088784 | 0.161175 |
| WDR33      | 2q14.3   | 0.087185 | 0.088816 | 0.161216 |
| AKR1C1     | 10p15.1  | -0.08718 | 0.088823 | 0.161216 |
| CHRNA4     | 20q13.33 | -0.08716 | 0.088908 | 0.161355 |
| VPS45      | 1q21.2   | 0.087146 | 0.088961 | 0.161437 |
| COA3       | 17q21.2  | -0.08714 | 0.088994 | 0.161472 |
| ENC1       | 5q13.3   | 0.087136 | 0.088996 | 0.161472 |
| CHAC1      | 15q15.1  | 0.087124 | 0.089043 | 0.161542 |
| ICA1L      | 2q33.2   | -0.08711 | 0.089089 | 0.161611 |
| IL17RB     | 3p21.1   | 0.087088 | 0.089175 | 0.161752 |
| TMEM184A   | 7p22.3   | 0.087064 | 0.089262 | 0.161895 |
| SPO11      | 20q13.31 | -0.08706 | 0.089277 | 0.161908 |
| TBC1D13    | 9q34.11  | 0.087051 | 0.089312 | 0.161957 |
| ATP5MF     | 7q22.1   | 0.087045 | 0.089333 | 0.16198  |
| NIPSNAP3A  | 9q31.1   | -0.08702 | 0.089424 | 0.162123 |
| DRG2       | 17p11.2  | -0.08702 | 0.08943  | 0.162123 |
| OPN3       | 1q43     | -0.08702 | 0.089436 | 0.162123 |
| COQ10A     | 12q13.3  | -0.08701 | 0.089444 | 0.162123 |
| FAM90A7P   | 8p23.1   | 0.087005 | 0.08948  | 0.162173 |
| CEP104     | 1p36.32  | 0.087001 | 0.089497 | 0.162189 |
| HCCAT5     | 16q22.3  | -0.08695 | 0.089669 | 0.162487 |
| SON        | 21q22.11 | 0.086939 | 0.089724 | 0.162571 |
| DDX52      | 17q12    | -0.08693 | 0.089752 | 0.162608 |
| WASHC2A    | 10q11.23 | 0.086927 | 0.089768 | 0.162616 |
| RBBP8      | 18q11.2  | 0.086926 | 0.089773 | 0.162616 |
| GRAPL      | 17p11.2  | -0.08691 | 0.089827 | 0.1627   |
| SMDT1      | 22q13.2  | -0.08691 | 0.089844 | 0.162716 |
| TUBA8      | 22q11.21 | 0.086902 | 0.089862 | 0.162734 |
| SEMA4A     | 1q22     | -0.08689 | 0.089905 | 0.162796 |
| KHDRBS2    | 6q11.1   | -0.08687 | 0.089988 | 0.162931 |
| CCDC30     | 1p34.2   | 0.086854 | 0.09004  | 0.163011 |
| OR7A10     | 19p13.12 | -0.08685 | 0.090073 | 0.163048 |
| TNFRSF10D  | 8p21.3   | -0.08684 | 0.090076 | 0.163048 |
| ELOA2      | 18q21.1  | 0.086791 | 0.090273 | 0.16339  |
| ATP6V1G3   | 1q31.3   | 0.08677  | 0.090351 | 0.163506 |
| SLC9A3     | 5p15.33  | 0.08677  | 0.090354 | 0.163506 |
| AKIP1      | 11p15.4  | -0.08677 | 0.090368 | 0.163516 |
| NET1       | 10p15.1  | -0.08676 | 0.090403 | 0.163565 |
| PRSS21     | 16p13.3  | -0.08673 | 0.090518 | 0.163757 |
| DMBT1P1    | 10q26.13 | 0.086719 | 0.090542 | 0.163787 |
| DDX42      | 17q23.3  | 0.086666 | 0.09074  | 0.164129 |
| ARPC4      | 3p25.3   | -0.08666 | 0.090757 | 0.164147 |
| PAXIP1-AS2 | 7q36.2   | -0.08665 | 0.090787 | 0.164186 |
| ACVRL1     | 12q13.13 | -0.08665 | 0.09081  | 0.164212 |

|           |                      |          |          |          |
|-----------|----------------------|----------|----------|----------|
| HCCS      | Xp22.2               | -0.08664 | 0.090855 | 0.164269 |
| WDR12     | 2q33.2               | 0.086633 | 0.090864 | 0.164269 |
| TAS2R13   | 12p13.2              | 0.086633 | 0.090866 | 0.164269 |
| DDX5      | 17q23.3              | -0.08662 | 0.090894 | 0.164305 |
| AGBL4     | 1p33                 | 0.086615 | 0.09093  | 0.164356 |
| POLR2J2   | 7q22.1               | -0.08661 | 0.090952 | 0.16438  |
| VPS51     | 11q13.1              | -0.08658 | 0.091051 | 0.164543 |
| DLGAP4    | 20q11.23             | -0.08658 | 0.091059 | 0.164543 |
| NFAT5     | 16q22.1              | -0.08658 | 0.091076 | 0.16456  |
| USF2      | 19q13.12             | 0.086566 | 0.091115 | 0.164616 |
| CPEB3     | 10q23.32             | -0.08656 | 0.091131 | 0.164629 |
| SNORA78   | 16p13.3              | 0.086542 | 0.091206 | 0.16475  |
| PPDPFL    | 8q11.21              | -0.08653 | 0.091235 | 0.164785 |
| C9ORF131  | 9p13.3               | 0.086532 | 0.091242 | 0.164785 |
| LINC00520 | 14q22.3              | 0.086518 | 0.091297 | 0.164869 |
| HRNR      | 1q21.3               | -0.08651 | 0.091333 | 0.164921 |
| SHH       | 7q36.3               | -0.0865  | 0.091368 | 0.164956 |
| C14ORF39  | 14q23.1              | -0.0865  | 0.09137  | 0.164956 |
| ZNF227    | 19q13.31             | -0.08649 | 0.091396 | 0.164981 |
| MYO7A     | 11q13.5              | -0.08649 | 0.0914   | 0.164981 |
| C12ORF75  | 12q23.3              | 0.086482 | 0.091431 | 0.165023 |
| LOC286359 | 9q22.33              | 0.086453 | 0.091539 | 0.165203 |
| LY6G6F    | 6p21.33              | -0.08643 | 0.09164  | 0.165369 |
| CYC1      | 8q24.3               | 0.0864   | 0.091739 | 0.165534 |
| LOC441455 | 9q22.33              | -0.08639 | 0.091763 | 0.165561 |
| LINC00599 | 8p23.1               | 0.08639  | 0.091779 | 0.165561 |
| MYO1F     | 19p13.2              | -0.08639 | 0.09178  | 0.165561 |
| CWC25     | 17q12                | 0.086387 | 0.091787 | 0.165561 |
| NBN       | 8q21.3               | -0.08637 | 0.091854 | 0.165659 |
| RPS6KA2   | 6q27                 | -0.08637 | 0.091858 | 0.165659 |
| ATOX1     | 5q33.1               | -0.08635 | 0.091933 | 0.165779 |
| NICN1     | 3p21.31              | -0.08634 | 0.091967 | 0.165826 |
| KIAA1671  | 22q11.23             | 0.086336 | 0.09198  | 0.165834 |
| SEC22C    | 3p22.1               | -0.08632 | 0.09203  | 0.165905 |
| NSD3      | 8p11.23              | 0.086321 | 0.092036 | 0.165905 |
| TMPRSS12  | 12q13.12             | -0.08629 | 0.09217  | 0.166131 |
| ANPEP     | 15q26.1              | -0.08628 | 0.092202 | 0.166174 |
| PANK2     | 20p13                | -0.08627 | 0.09223  | 0.16621  |
| FAM92A    | 8q22.1               | -0.08627 | 0.092244 | 0.16622  |
| PITX3     | 10q24.32             | -0.08626 | 0.092274 | 0.16626  |
| MSGN1     | 2p24.2               | -0.08625 | 0.092294 | 0.166281 |
| OGFRL1    | 6q13                 | -0.08625 | 0.092307 | 0.166288 |
| APTX      | 9p21.1               | 0.086223 | 0.09241  | 0.166452 |
| ABCB11    | 2q31.1               | 0.086222 | 0.092414 | 0.166452 |
| LSM3      | 3p25.1               | 0.08621  | 0.092458 | 0.166502 |
| TCTEX1D2  | 3q29                 | 0.08621  | 0.092459 | 0.166502 |
| UBQLN1    | 9q21.32 9q21.2-q21.3 | 0.086199 | 0.092499 | 0.166561 |
| PRSS42P   | 3p21.31              | -0.08619 | 0.092524 | 0.16659  |
| LDHAL6B   | 15q22.2              | 0.086181 | 0.092567 | 0.166633 |
| SPANXN4   | Xq27.3               | -0.08618 | 0.092569 | 0.166633 |
| BTF3      | 5q13.2               | -0.08618 | 0.092573 | 0.166633 |
| SLC43A3   | 11q12.1              | -0.08616 | 0.092665 | 0.166783 |
| MED27     | 9q34.13              | 0.086149 | 0.09269  | 0.166814 |
| MAT1A     | 10q22.3              | -0.08613 | 0.092746 | 0.1669   |
| KCTD6     | 3p14.3               | 0.08611  | 0.092837 | 0.167048 |
| GIPC1     | 19p13.12             | 0.086098 | 0.092885 | 0.16712  |
| TEX101    | 19q13.31             | 0.086079 | 0.092958 | 0.167236 |
| PPARA     | 22q13.31             | 0.086064 | 0.093013 | 0.167295 |

|            |                 |          |          |          |
|------------|-----------------|----------|----------|----------|
| STN1       | 10q24.33        | -0.08606 | 0.093016 | 0.167295 |
| SCARNA11   | 12p13.31        | 0.086062 | 0.093021 | 0.167295 |
| MTNR1B     | 11q14.3         | -0.08606 | 0.093024 | 0.167295 |
| VIRMA      | 8q22.1          | -0.08604 | 0.093086 | 0.167391 |
| SIGLECL1   | 19q13.41        | -0.08601 | 0.093209 | 0.167597 |
| PUM2       | 2p24.1          | -0.086   | 0.093262 | 0.167651 |
| FICD       | 12q23.3         | -0.086   | 0.093263 | 0.167651 |
| NSMCE4A    | 10q26.13        | 0.085996 | 0.093272 | 0.167651 |
| GBX1       | 7q36.1          | 0.085994 | 0.093281 | 0.167651 |
| RETN       | 19p13.2         | -0.08599 | 0.093281 | 0.167651 |
| ATMIN      | 16q23.2         | -0.08598 | 0.093318 | 0.167703 |
| INSL6      | 9p24.1          | 0.085982 | 0.093328 | 0.167706 |
| ADAMDEC1   | 8p21.2          | -0.08598 | 0.093339 | 0.167711 |
| AHRR       | 5p15.33         | 0.085945 | 0.093468 | 0.167927 |
| G6PC3      | 17q21.31        | 0.085938 | 0.093496 | 0.167962 |
| LEPROTL1   | 8p12            | -0.08593 | 0.093508 | 0.167969 |
| MCHR1      | 22q13.2         | -0.08593 | 0.093537 | 0.167991 |
| GPR119     | Xq26.1          | -0.08592 | 0.093545 | 0.167991 |
| SIDT1      | 3q13.2          | 0.085925 | 0.093545 | 0.167991 |
| C19ORF73   | 19q13.33        | 0.08592  | 0.093563 | 0.168007 |
| AKAP5      | 14q23.3         | -0.08592 | 0.093579 | 0.168009 |
| KLHDC9     | 1q23.3          | 0.085914 | 0.093589 | 0.168009 |
| SLC25A4    | 4q35.1          | -0.08591 | 0.093589 | 0.168009 |
| MESTIT1    | 7q32.2          | 0.085907 | 0.093613 | 0.168031 |
| TMEM268    | 9q32            | 0.085906 | 0.093618 | 0.168031 |
| SLC25A15   | 13q14.11        | 0.085899 | 0.093644 | 0.168062 |
| TEX44      | 2q37.1          | 0.085896 | 0.093655 | 0.168066 |
| SERPINA11  | 14q32.13        | -0.08589 | 0.093665 | 0.16807  |
| TRMT2B     | Xq22.1          | 0.085859 | 0.093798 | 0.168294 |
| LRRC18     | 10q11.23        | -0.08584 | 0.093881 | 0.168428 |
| GDF3       | 12p13.31        | -0.08582 | 0.09393  | 0.1685   |
| LOC344967  | 4p14            | 0.085822 | 0.093942 | 0.168506 |
| TIAM1      | 21q22.11        | -0.08582 | 0.093963 | 0.168528 |
| C4BPA      | 1q32.2          | 0.085807 | 0.093999 | 0.168579 |
| OR2AG1     | 11p15.4         | 0.085793 | 0.094051 | 0.168656 |
| TMEM266    | 15q24.2         | -0.08579 | 0.094076 | 0.168686 |
| TUBB3      | 16q24.3         | -0.08577 | 0.094137 | 0.16878  |
| S1PR4      | 19p13.3         | -0.08576 | 0.094196 | 0.168858 |
| CDC5L      | 6p21.1          | 0.085755 | 0.094197 | 0.168858 |
| GOLGA8EP   | 15q11.2         | 0.085739 | 0.09426  | 0.168952 |
| PDE11A     | 2q31.2          | -0.08574 | 0.094266 | 0.168952 |
| PLEKHG1    | 6q25.1          | -0.08573 | 0.094298 | 0.168991 |
| SLC2A4RG   | 20q13.33        | 0.085727 | 0.094305 | 0.168991 |
| OR51A2     | 11p15.4         | 0.085716 | 0.094348 | 0.169053 |
| GPR158-AS1 | 10p12.1         | -0.08571 | 0.094382 | 0.169099 |
| EMILIN2    | 18p11.32-p11.31 | -0.0857  | 0.094408 | 0.16913  |
| RNF215     | 22q12.2         | -0.08568 | 0.094505 | 0.169289 |
| FBXW7      | 4q31.3          | 0.085668 | 0.094532 | 0.169322 |
| PROCR      | 20q11.22        | -0.08566 | 0.094577 | 0.169387 |
| VSIG8      | 1q23.2          | 0.085633 | 0.094671 | 0.16954  |
| SPANXN3    | Xq27.3          | -0.08562 | 0.0947   | 0.169578 |
| EPB41L1    | 20q11.23        | -0.08561 | 0.094776 | 0.169699 |
| CELA3B     | 1p36.12         | -0.08557 | 0.094902 | 0.16991  |
| ZFP41      | 8q24.3          | 0.085553 | 0.094979 | 0.170032 |
| CXCR5      | 11q23.3         | -0.08555 | 0.094992 | 0.170039 |
| UFM1       | 13q13.3         | -0.08554 | 0.095019 | 0.170073 |
| SPANXC     | Xq27.2          | -0.08552 | 0.095108 | 0.170217 |
| DPY19L2P2  | 7q22.1          | 0.085498 | 0.095191 | 0.170339 |



|                 |          |          |          |          |
|-----------------|----------|----------|----------|----------|
| DHRS1           | 14q12    | 0.085498 | 0.095193 | 0.170339 |
| PDPK1           | 16p13.3  | 0.08549  | 0.095225 | 0.17038  |
| IFIT3           | 10q23.31 | -0.08547 | 0.095287 | 0.170476 |
| RPL3            | 22q13.1  | -0.08545 | 0.095377 | 0.170622 |
| FAM91A1         | 8q24.13  | -0.08544 | 0.095425 | 0.170689 |
| ENGASE          | 17q25.3  | 0.085436 | 0.095434 | 0.170689 |
| RTP3            | 3p21.31  | -0.08543 | 0.095443 | 0.170689 |
| CCDC58          | 3q21.1   | 0.085432 | 0.095448 | 0.170689 |
| SEC24D          | 4q26     | -0.08543 | 0.095463 | 0.170699 |
| FRAT1           | 10q24.1  | 0.085421 | 0.095492 | 0.170733 |
| RASD1           | 17p11.2  | -0.08542 | 0.095499 | 0.170733 |
| XRN2            | 20p11.22 | -0.08541 | 0.095546 | 0.170803 |
| LIMS3-LOC440895 | 2q13     | -0.0854  | 0.095577 | 0.170842 |
| MOSMO           | 16p12.2  | -0.08539 | 0.095614 | 0.170894 |
| CFL1P1          | 10q23.31 | -0.08539 | 0.095628 | 0.170904 |
| ABHD16A         | 6p21.33  | 0.085355 | 0.09575  | 0.171105 |
| LOC90784        | 2p11.2   | 0.085351 | 0.095766 | 0.171119 |
| PRRT4           | 7q32.1   | 0.085338 | 0.095817 | 0.171195 |
| BBIP1           | 10q25.2  | -0.0853  | 0.095982 | 0.171462 |
| SCGB1D1         | 11q12.3  | -0.08529 | 0.095986 | 0.171462 |
| SLC28A2         | 15q21.1  | 0.085293 | 0.095992 | 0.171462 |
| VWA7            | 6p21.33  | 0.085285 | 0.096024 | 0.171465 |
| IFNGR1          | 6q23.3   | -0.08528 | 0.096029 | 0.171465 |
| DLL3            | 19q13.2  | -0.08528 | 0.096033 | 0.171465 |
| SLC10A6         | 4q21.3   | -0.08528 | 0.096035 | 0.171465 |
| PLAC1           | Xq26.3   | -0.08528 | 0.096042 | 0.171465 |
| ISG15           | 1p36.33  | -0.08528 | 0.096045 | 0.171465 |
| VPS13B          | 8q22.2   | -0.08527 | 0.0961   | 0.171549 |
| PTPRJ           | 11p11.2  | -0.08526 | 0.096122 | 0.171572 |
| OR10X1          | 1q23.1   | -0.08525 | 0.096153 | 0.171612 |
| ASCL2           | 11p15.5  | -0.08524 | 0.096197 | 0.171669 |
| PRX             | 19q13.2  | -0.08524 | 0.096206 | 0.171669 |
| MGC57346        | 17q21.31 | 0.085237 | 0.096211 | 0.171669 |
| OSTN            | 3q28     | -0.08523 | 0.096224 | 0.171678 |
| SCARNA9L        | Xp22.12  | 0.085229 | 0.096241 | 0.171692 |
| JRKL            | 11q21    | 0.085224 | 0.096261 | 0.171712 |
| EIF4G3          | 1p36.12  | 0.085208 | 0.096322 | 0.171807 |
| HOXA4           | 7p15.2   | 0.085206 | 0.096332 | 0.171809 |
| C1QL3           | 10p13    | 0.085202 | 0.096348 | 0.171823 |
| UBE2Q2P1        | 15q25.2  | 0.085196 | 0.096372 | 0.17185  |
| CLPB            | 11q13.4  | 0.085182 | 0.096426 | 0.171931 |
| ARHGAP27P2      | 17q24.2  | -0.08517 | 0.096481 | 0.172013 |
| IFITM3          | 11p15.5  | -0.08516 | 0.096516 | 0.172055 |
| PMAIP1          | 18q21.32 | -0.08516 | 0.096527 | 0.172055 |
| UGT1A9          | 2q37.1   | -0.08516 | 0.09653  | 0.172055 |
| ZNF664          | 12q24.31 | 0.085141 | 0.096588 | 0.172142 |
| IKZF2           | 2q34     | -0.08513 | 0.096648 | 0.172234 |
| CAAP1           | 9p21.2   | -0.08511 | 0.096705 | 0.172321 |
| CELSR1          | 22q13.31 | 0.085104 | 0.096731 | 0.172352 |
| VCX3B           | Xp22.31  | -0.08507 | 0.096859 | 0.172564 |
| GRPEL2          | 5q32     | 0.084993 | 0.097172 | 0.173106 |
| CBR3            | 21q22.12 | 0.084964 | 0.097283 | 0.173289 |
| GCDH            | 19p13.13 | 0.084959 | 0.097305 | 0.173313 |
| DZANK1          | 20p11.23 | -0.08495 | 0.097339 | 0.173358 |
| HIST1H4C        | 6p22.2   | 0.084948 | 0.097348 | 0.173359 |
| ZFP36L2         | 2p21     | -0.08494 | 0.097385 | 0.17341  |
| STIP1           | 11q13.1  | 0.084911 | 0.097494 | 0.173576 |
| FUT11           | 10q22.2  | -0.08491 | 0.0975   | 0.173576 |

|             |                    |          |          |          |
|-------------|--------------------|----------|----------|----------|
| FAM171A2    | 17q21.31           | -0.08491 | 0.097505 | 0.173576 |
| GEMIN8P4    | 1p22.2             | 0.084884 | 0.0976   | 0.173716 |
| LGALS9      | 17q11.2            | -0.08488 | 0.097601 | 0.173716 |
| SPINK7      | 5q32               | -0.08488 | 0.097624 | 0.173741 |
| CTXN2       | 15q21.1            | -0.08486 | 0.097697 | 0.173856 |
| CXCR2P1     | 2q35               | -0.08484 | 0.097765 | 0.173961 |
| ZNF668      | 16p11.2            | 0.084836 | 0.097793 | 0.173996 |
| FAM181A     | 14q32.12           | -0.08482 | 0.097854 | 0.174089 |
| TFAP2E      | 1p34.3             | 0.084812 | 0.097888 | 0.17412  |
| DNAJC25     | 9q31.3             | 0.084811 | 0.097889 | 0.17412  |
| GSC2        | 22q11.21           | -0.08479 | 0.097986 | 0.174278 |
| HMGN4       | 6p22.2             | -0.08476 | 0.098095 | 0.174456 |
| BCL7B       | 7q11.23            | -0.08475 | 0.098124 | 0.174492 |
| ADGRV1      | 5q14.3             | -0.08472 | 0.098236 | 0.174655 |
| CHIT1       | 1q32.1             | -0.08472 | 0.09824  | 0.174655 |
| MAP4K5      | 14q22.1            | -0.08472 | 0.098242 | 0.174655 |
| OC90        | 8q24.22            | -0.0847  | 0.09834  | 0.174814 |
| SMYD3       | 1q44               | 0.084689 | 0.098376 | 0.174863 |
| NINL        | 20p11.21           | -0.08468 | 0.098418 | 0.174921 |
| UGT1A8      | 2q37.1             | -0.08467 | 0.098434 | 0.174935 |
| PRKD3       | 2p22.2             | -0.08467 | 0.098449 | 0.174946 |
| MAK         | 6p24.2             | 0.084654 | 0.098515 | 0.175048 |
| MTERF1      | 7q21.2             | -0.08465 | 0.098537 | 0.175071 |
| LRCH1       | 13q14.13-q14.2     | 0.084636 | 0.098589 | 0.175149 |
| KMT2A       | 11q23.3            | 0.084619 | 0.098655 | 0.175249 |
| IGF2BP2-AS1 | 3q27.2             | -0.0846  | 0.098724 | 0.175353 |
| WDFY3       | 4q21.23            | -0.0846  | 0.098731 | 0.175353 |
| CNKS3       | 6q25.2             | 0.084554 | 0.098917 | 0.175669 |
| PARP16      | 15q22.31           | -0.08454 | 0.098964 | 0.175736 |
| ZNF658      | 9q21.11            | -0.08452 | 0.099039 | 0.175852 |
| INTS8       | 8q22.1             | 0.084521 | 0.099047 | 0.175852 |
| SIX4        | 14q23.1            | -0.08451 | 0.099094 | 0.17591  |
| MRPL46      | 15q25.3            | 0.084509 | 0.099097 | 0.17591  |
| CALML4      | 15q23              | 0.084507 | 0.099106 | 0.17591  |
| DLX6-AS1    | 7q21.3             | -0.0845  | 0.099141 | 0.175957 |
| DDX17       | 22q13.1            | 0.084486 | 0.099187 | 0.176022 |
| RPL39L      | 3q27.3             | -0.08447 | 0.099271 | 0.176156 |
| ALPI        | 2q37.1             | 0.084458 | 0.0993   | 0.176193 |
| INHA        | 2q35               | 0.084445 | 0.099354 | 0.176272 |
|             | 1-Mar 4q32.2-q32.3 | -0.08444 | 0.099389 | 0.176319 |
| IMMT        | 2p11.2 2           | 0.08442  | 0.099452 | 0.176401 |
| GJA3        | 13q12.11           | 0.08442  | 0.099453 | 0.176401 |
| TOX2        | 20q13.12           | -0.08441 | 0.099486 | 0.176444 |
| TMED10P1    | 8q24.3             | -0.08439 | 0.099573 | 0.176582 |
| C4ORF47     | 4q35.1             | -0.08438 | 0.099613 | 0.176639 |
| KBTD6       | 13q14.11           | -0.08437 | 0.099653 | 0.176692 |
| SPRR2G      | 1q21.3             | -0.08435 | 0.099741 | 0.176833 |
| ARHGDI3     | 16p13.3            | 0.084341 | 0.099773 | 0.176874 |
| COQ5        | 12q24.31           | -0.08433 | 0.099833 | 0.176966 |
| OR51A7      | 11p15.4            | 0.084322 | 0.099847 | 0.176974 |
| TAF4B       | 18q11.2            | 0.084308 | 0.099906 | 0.177057 |
| GALNT18     | 11p15.4            | -0.08431 | 0.099915 | 0.177057 |
| PAQR5       | 15q23              | -0.0843  | 0.09992  | 0.177057 |
| MYF6        | 12q21.31           | -0.0843  | 0.099946 | 0.177088 |
| RHOXF1      | Xq24               | 0.084283 | 0.100008 | 0.177181 |
| MFN2        | 1p36.22            | 0.084264 | 0.100084 | 0.177301 |
| PIK3CD-AS1  | 1p36.22            | -0.08426 | 0.100098 | 0.177309 |
| GPM6B       | Xp22.2             | -0.08426 | 0.100117 | 0.177327 |

|              |                 |          |          |          |
|--------------|-----------------|----------|----------|----------|
| BCDIN3D-AS1  | 12q13.12        | 0.084239 | 0.100183 | 0.177425 |
| IGF2BP1      | 17q21.32        | -0.08424 | 0.10019  | 0.177425 |
| PLEKHA8      | 7p14.3          | 0.084226 | 0.100235 | 0.177489 |
| FOXN1        | 17q11.2         | -0.08421 | 0.100318 | 0.17762  |
| B4GALNT2     | 17q21.32        | -0.08419 | 0.10038  | 0.177703 |
| MRPL11       | 11q13.2         | 0.08419  | 0.100382 | 0.177703 |
| CISH         | 3p21.2          | -0.08418 | 0.100409 | 0.177735 |
| DLX6         | 7q21.3          | -0.08417 | 0.100459 | 0.177808 |
| CHCHD7       | 8q12.1          | -0.08415 | 0.100532 | 0.177922 |
| HBBP1        | 11p15.4         | -0.08415 | 0.100553 | 0.177943 |
| ACVR2B-AS1   | 3p22.2          | -0.08414 | 0.100568 | 0.177944 |
| AIRE         | 21q22.3         | -0.08414 | 0.100572 | 0.177944 |
| FAM24B       | 10q26.13        | 0.084135 | 0.100607 | 0.177987 |
| LOC100128288 | 17p13.1         | -0.08413 | 0.100614 | 0.177987 |
| OR11A1       | 6p22.1          | 0.084113 | 0.100694 | 0.178113 |
| SNRNP200     | 2q11.2          | 0.084097 | 0.100758 | 0.178211 |
| IHH          | 2q35            | -0.08408 | 0.100831 | 0.178325 |
| MTMR8        | Xq11.2          | -0.08404 | 0.100972 | 0.178558 |
| THRA         | 17q21.1         | -0.08403 | 0.101032 | 0.178648 |
| ATP2B1-AS1   | 12q21.33        | -0.08403 | 0.101052 | 0.178668 |
| SHLD2P3      | 10q11.22        | 0.084019 | 0.101076 | 0.178694 |
| GPR26        | 10q26.13        | -0.08401 | 0.101105 | 0.178729 |
| ZNF584       | 19q13.43        | 0.083984 | 0.101221 | 0.178911 |
| PHF11        | 13q14.2         | -0.08398 | 0.101225 | 0.178911 |
| NLRP1        | 17p13.2         | -0.08396 | 0.101321 | 0.179064 |
| MFS3         | 8q24.3          | 0.08394  | 0.101398 | 0.179185 |
| MRPL12       | 17q25.3         | 0.083935 | 0.10142  | 0.179208 |
| ZNF487       | 10q11.21        | -0.08393 | 0.101442 | 0.17922  |
| AP4M1        | 7q22.1          | -0.08393 | 0.101445 | 0.17922  |
| NLRP7        | 19q13.42        | -0.08393 | 0.101455 | 0.179223 |
| PIP4K2B      | 17q12           | -0.08392 | 0.101482 | 0.179253 |
| KCTD4        | 13q14.12-q14.13 | -0.0839  | 0.101558 | 0.179372 |
| TPT1-AS1     | 13q14.13        | -0.08387 | 0.101681 | 0.179573 |
| LOC646813    | 11p11.12        | 0.083858 | 0.101735 | 0.179654 |
| RNF2         | 1q25.3          | -0.08385 | 0.101765 | 0.17969  |
| GALNT4       | 12q21.33        | -0.08385 | 0.101782 | 0.179701 |
| DPM3         | 1q22            | 0.083845 | 0.101789 | 0.179701 |
| PRDM7        | 16q24.3         | 0.083839 | 0.101813 | 0.179727 |
| RPL36AL      | 14q21.3         | -0.08383 | 0.101861 | 0.179796 |
| RRN3P2       | 16p11.2         | -0.08381 | 0.101912 | 0.179868 |
| SELENOV      | 19q13.2         | -0.08381 | 0.101921 | 0.179868 |
| FASTKD2      | 2q33.3          | -0.08381 | 0.101936 | 0.179868 |
| HEPACAM2     | 7q21.2          | -0.08381 | 0.101938 | 0.179868 |
| PPIAL4G      | 1q21.2          | 0.08377  | 0.102095 | 0.18013  |
| RSPH9        | 6p21.1          | -0.08376 | 0.102128 | 0.180168 |
| ATG101       | 12q13.13        | -0.08376 | 0.102135 | 0.180168 |
| RASGEF1B     | 4q21.21         | -0.08375 | 0.102162 | 0.180201 |
| LINC01548    | 21q22.11        | -0.08375 | 0.102179 | 0.180215 |
| DMPK         | 19q13.32        | 0.083728 | 0.102267 | 0.180355 |
| FIRRE        | Xq26.2          | 0.083714 | 0.102326 | 0.180443 |
| RABIF        | 1q32.1          | 0.083708 | 0.102352 | 0.180472 |
| ALOX5        | 10q11.21        | -0.08369 | 0.102442 | 0.180615 |
| AGFG2        | 7q22.1          | 0.08368  | 0.102465 | 0.180633 |
| MRPS33       | 7q34            | -0.08368 | 0.102473 | 0.180633 |
| ZNF608       | 5q23.2          | -0.08368 | 0.102479 | 0.180633 |
| MYH16        | 7q22.1          | -0.08365 | 0.102597 | 0.180824 |
| CCL3         | 17q12           | -0.08364 | 0.102641 | 0.180875 |
| TCP10        | 6q27            | -0.08364 | 0.102644 | 0.180875 |

|              |               |          |          |          |
|--------------|---------------|----------|----------|----------|
| SPATA13      | 13q12.12      | 0.083627 | 0.102686 | 0.180933 |
| HOXD4        | 2q31.1        | 0.083622 | 0.102704 | 0.18095  |
| SLC7A7       | 14q11.2       | -0.08361 | 0.102739 | 0.180988 |
| CALB2        | 16q22.2       | -0.08361 | 0.102744 | 0.180988 |
| CFAP47       | Xp21.1        | -0.0836  | 0.102776 | 0.181029 |
| ERAP2        | 5q15          | -0.08358 | 0.102865 | 0.181146 |
| ASAH2B       | 10q11.23      | 0.083583 | 0.102866 | 0.181146 |
| KCNK5        | 6p21.2        | -0.08358 | 0.10287  | 0.181146 |
| ZNF333       | 19p13.12      | -0.08358 | 0.102883 | 0.181147 |
| C7ORF25      | 7p14.1        | -0.08358 | 0.102889 | 0.181147 |
| HABP2        | 10q25.3       | 0.083559 | 0.102967 | 0.181253 |
| RBFOX2       | 22q12.3       | -0.08356 | 0.102967 | 0.181253 |
| MYO15A       | 17p11.2       | -0.08355 | 0.102995 | 0.181287 |
| LINC-PINT    | 7q32.3        | 0.083547 | 0.103013 | 0.181302 |
| KCNQ1        | 11p15.5-p15.4 | 0.083514 | 0.103149 | 0.181527 |
| PTAFR        | 1p35.3        | -0.08351 | 0.103178 | 0.181561 |
| UFC1         | 1q23.3        | -0.0835  | 0.103201 | 0.181578 |
| AADA4L4      | 1p36.21       | -0.0835  | 0.103206 | 0.181578 |
| RBM47        | 4p14          | 0.083472 | 0.103323 | 0.181769 |
| CHDH         | 3p21.1        | 0.083453 | 0.103403 | 0.181893 |
| ADGRF3       | 2p23.3        | -0.08344 | 0.103451 | 0.181961 |
| TXNRD3NB     | 3q21.3        | -0.08343 | 0.103494 | 0.182021 |
| INSL3        | 19p13.11      | 0.083413 | 0.103569 | 0.182136 |
| SLC22A18AS   | 11p15.4       | 0.083405 | 0.103603 | 0.182181 |
| SDR16C6P     | 8q12.1        | 0.083393 | 0.103652 | 0.182235 |
| SCARNA18     | 5q14.2        | -0.08339 | 0.103652 | 0.182235 |
| WDR36        | 5q22.1        | 0.083378 | 0.103716 | 0.182331 |
| LRRC37A3     | 17q24.1       | -0.08337 | 0.10376  | 0.182392 |
| IFIT2        | 10q23.31      | -0.08334 | 0.10389  | 0.182604 |
| BRMS1L       | 14q13.2       | -0.08333 | 0.103924 | 0.182648 |
| MRAP2        | 6q14.2        | 0.083326 | 0.103933 | 0.182648 |
| MPND         | 19p13.3       | -0.0833  | 0.104055 | 0.182846 |
| ZDHHC8       | 22q11.21      | 0.083284 | 0.104108 | 0.182925 |
| GJB7         | 6q14.3-q15    | 0.083272 | 0.104155 | 0.182991 |
| SEC14L2      | 22q12.2       | -0.08325 | 0.10424  | 0.183123 |
| CALHM1       | 10q24.33      | -0.08324 | 0.104311 | 0.183232 |
| PDZK1        | 1q21.1        | -0.08323 | 0.104347 | 0.183281 |
| MSMP         | 9p13.3        | 0.083214 | 0.104398 | 0.183354 |
| NFATC2       | 20q13.2       | -0.0832  | 0.104457 | 0.183441 |
| SCARNA1      | 1p35.3        | -0.08317 | 0.10457  | 0.183623 |
| RPL19        | 17q12         | -0.08315 | 0.10466  | 0.183765 |
| MFSD6        | 2q32.2        | -0.08314 | 0.104691 | 0.183803 |
| FNBP1L       | 1p22.1        | -0.08312 | 0.104779 | 0.183942 |
| LACC1        | 13q14.11      | -0.08311 | 0.104838 | 0.184029 |
| SAP30BP      | 17q25.1       | -0.0831  | 0.104859 | 0.184051 |
| WDR81        | 17p13.3       | -0.08304 | 0.10512  | 0.184477 |
| ZBBX         | 3q26.1        | -0.08304 | 0.105124 | 0.184477 |
| LOC100128164 | 3q26.2        | -0.08304 | 0.10513  | 0.184477 |
| DNAJC15      | 13q14.11      | -0.08304 | 0.105141 | 0.184481 |
| GVINP1       | 11p15.4       | -0.08302 | 0.105194 | 0.184558 |
| ZNF813       | 19q13.42      | -0.08298 | 0.105379 | 0.184865 |
| RAD51C       | 17q22         | 0.082956 | 0.105483 | 0.185032 |
| LINC00606    | 3p25.3        | -0.08293 | 0.105598 | 0.185168 |
| GPR139       | 16p12.3       | 0.082929 | 0.105598 | 0.185168 |
| PPBPP1       | 4q13.3        | -0.08293 | 0.105598 | 0.185168 |
| DEFB123      | 20q11.21      | -0.08293 | 0.105598 | 0.185168 |
| CTSV         | 9q22.33       | -0.08292 | 0.10563  | 0.185209 |
| DNMBP        | 10q24.2       | 0.082917 | 0.105646 | 0.18522  |

|              |          |          |          |          |
|--------------|----------|----------|----------|----------|
| PMS2P2       | 7q11.23  | 0.082896 | 0.105733 | 0.185346 |
| RUFY3        | 4q13.3   | 0.082896 | 0.105736 | 0.185346 |
| FGF3         | 11q13.3  | -0.08289 | 0.105753 | 0.185358 |
| TMPRSS11BNL  | 4q13.2   | -0.08288 | 0.105797 | 0.18542  |
| MIB1         | 18q11.2  | -0.08287 | 0.10585  | 0.185497 |
| TBC1D10A     | 22q12.2  | -0.08286 | 0.105881 | 0.185536 |
| LINC02731    | 11q25    | -0.08286 | 0.105901 | 0.185554 |
| LMNTD1       | 12p12.1  | -0.08285 | 0.105921 | 0.185573 |
| IL17B        | 5q32     | -0.08283 | 0.106002 | 0.185698 |
| POLN         | 4p16.3   | -0.08282 | 0.106044 | 0.185747 |
| FBXO9        | 6p12.1   | 0.082822 | 0.106049 | 0.185747 |
| RSRC2        | 12q24.31 | 0.082813 | 0.106086 | 0.185786 |
| CLDN16       | 3q28     | -0.08281 | 0.106089 | 0.185786 |
| SNORA65      | 9q33.3   | 0.082802 | 0.106133 | 0.185847 |
| F8A1         | Xq28     | 0.082787 | 0.106198 | 0.185944 |
| RPS15        | 19p13.3  | 0.082775 | 0.106246 | 0.186012 |
| DMRT3        | 9p24.3   | -0.08277 | 0.106272 | 0.18603  |
| HBQ1         | 16p13.3  | 0.082768 | 0.106275 | 0.18603  |
| KIF13A       | 6p22.3   | 0.08275  | 0.106353 | 0.186151 |
| PARP8        | 5q11.1   | -0.08274 | 0.106391 | 0.1862   |
| RHBDD1       | 2q36.3   | -0.08273 | 0.106428 | 0.186249 |
| CD80         | 3q13.33  | -0.08273 | 0.106453 | 0.186259 |
| STAU1        | 20q13.13 | -0.08273 | 0.106457 | 0.186259 |
| ARHGFEF40    | 14q11.2  | -0.08272 | 0.106463 | 0.186259 |
| C9ORF50      | 9q34.11  | 0.08272  | 0.10648  | 0.186259 |
| ARHGDI4      | 17q25.3  | 0.08272  | 0.10648  | 0.186259 |
| LBHD1        | 11q12.3  | 0.082703 | 0.106553 | 0.186371 |
| FAM221A      | 7p15.3   | 0.082651 | 0.106774 | 0.18674  |
| ASCL1        | 12q23.2  | -0.08264 | 0.106799 | 0.186769 |
| RD3          | 1q32.3   | -0.08262 | 0.106898 | 0.186883 |
| OR52N5       | 11p15.4  | -0.08262 | 0.106901 | 0.186883 |
| FAF1         | 1p32.3   | 0.082621 | 0.106903 | 0.186883 |
| HLF          | 17q22    | -0.08262 | 0.106905 | 0.186883 |
| HIF1A        | 14q23.2  | -0.08262 | 0.106911 | 0.186883 |
| DHX29        | 5q11.2   | 0.082602 | 0.106984 | 0.186983 |
| ANP32D       | 12q13.11 | -0.0826  | 0.10699  | 0.186983 |
| TBKBP1       | 17q21.32 | -0.0826  | 0.106997 | 0.186983 |
| MANSC1       | 12p13.2  | -0.08255 | 0.107221 | 0.187358 |
| DPM1         | 20q13.13 | -0.08254 | 0.107258 | 0.187407 |
| CALM1        | 14q32.11 | -0.08252 | 0.10734  | 0.187534 |
| MACROD1      | 11q13.1  | 0.082515 | 0.107354 | 0.187542 |
| CAMTA2       | 17p13.2  | 0.082488 | 0.107469 | 0.187726 |
| AVEN         | 15q14    | -0.08246 | 0.107589 | 0.187919 |
| LOC100134868 | 20p11.1  | -0.08244 | 0.107672 | 0.188048 |
| USP28        | 11q23.2  | 0.082427 | 0.10773  | 0.188133 |
| PIGW         | 17q12    | 0.08242  | 0.10776  | 0.18817  |
| LINC00284    | 13q14.11 | -0.08241 | 0.10781  | 0.188241 |
| GPR173       | Xp11.22  | -0.0824  | 0.107865 | 0.18832  |
| GLYR1        | 16p13.3  | 0.082392 | 0.107879 | 0.188328 |
| OR2L13       | 1q44     | -0.08238 | 0.107926 | 0.188394 |
| DKC1         | Xq28     | 0.082373 | 0.107964 | 0.188442 |
| GLI4         | 8q24.3   | 0.082369 | 0.107979 | 0.188446 |
| CACHD1       | 1p31.3   | -0.08237 | 0.107985 | 0.188446 |
| EGR3         | 8p21.3   | -0.08236 | 0.108    | 0.188457 |
| AP1S1        | 7q22.1   | 0.08236  | 0.108019 | 0.188473 |
| EFNB1        | Xq13.1   | 0.082356 | 0.108033 | 0.188481 |
| PRB4         | 12p13.2  | -0.08235 | 0.108067 | 0.188525 |
| SAMD4A       | 14q22.2  | -0.08234 | 0.108083 | 0.188535 |

|              |               |          |          |          |
|--------------|---------------|----------|----------|----------|
| ARRB1        | 11q13.4       | -0.08234 | 0.108098 | 0.188545 |
| PTRHD1       | 2p23.3        | -0.08233 | 0.108161 | 0.18864  |
| HSPB11       | 1p32.3        | -0.08231 | 0.108218 | 0.188722 |
| TRAPPC8      | 18q12.1       | -0.08231 | 0.108238 | 0.188739 |
| SDHAF4       | 6q13          | -0.08231 | 0.108247 | 0.188739 |
| SP7          | 12q13.13      | -0.0823  | 0.108257 | 0.18874  |
| TBC1D2B      | 15q24.3-q25.1 | -0.08227 | 0.1084   | 0.188974 |
| CLEC4M       | 19p13.2       | -0.08227 | 0.108421 | 0.188994 |
| SSR4         | Xq28          | -0.08226 | 0.108433 | 0.188997 |
| NOP53        | 19q13.33      | -0.08226 | 0.108442 | 0.188997 |
| NPM3         | 10q24.32      | 0.082236 | 0.10855  | 0.189167 |
| ZNF774       | 15q26.1       | 0.082234 | 0.108558 | 0.189167 |
| EIF4H        | 7q11.23       | 0.082228 | 0.108588 | 0.189202 |
| GPC2         | 7q22.1        | 0.082213 | 0.108652 | 0.189297 |
| MFNG         | 22q13.1       | -0.08219 | 0.108741 | 0.189436 |
| C22ORF39     | 22q11.21      | -0.08219 | 0.108771 | 0.189471 |
| RBX1         | 22q13.2       | -0.08218 | 0.108809 | 0.189521 |
| PRSS3P2      | 7q34          | -0.08217 | 0.108848 | 0.189574 |
| AAGAB        | 15q23         | 0.082161 | 0.108874 | 0.189602 |
| NEDD1        | 12q23.1       | 0.082156 | 0.108895 | 0.189622 |
| TMEM175      | 4p16.3        | 0.082144 | 0.108948 | 0.189698 |
| YWHAZ        | 8q22.3        | -0.08212 | 0.109036 | 0.189834 |
| DCAF12       | 9p13.3        | 0.08212  | 0.109054 | 0.189848 |
| HIST1H2BI    | 6p22.2        | 0.08211  | 0.109095 | 0.189904 |
| RASL11A      | 13q12.2       | 0.082081 | 0.109222 | 0.190109 |
| MUC16        | 19p13.2       | -0.08207 | 0.109249 | 0.190139 |
| OR13D1       | 9q31.1        | 0.082068 | 0.109275 | 0.190168 |
| MROH5        | 8q24.3        | 0.082063 | 0.109297 | 0.190189 |
| PIGC         | 1q24.3        | -0.08204 | 0.109415 | 0.190379 |
| OR5AU1       | 14q11.2       | 0.082006 | 0.109545 | 0.190588 |
| OR5M3        | 11q12.1       | 0.081999 | 0.109575 | 0.19062  |
| UBE2J2       | 1p36.33       | 0.081996 | 0.109588 | 0.19062  |
| GABRA1       | 5q34          | -0.08199 | 0.109601 | 0.19062  |
| TOB2         | 22q13.2       | -0.08199 | 0.109601 | 0.19062  |
| CCL4         | 17q12         | -0.08198 | 0.10964  | 0.19067  |
| BLVRB        | 19q13.2       | 0.081976 | 0.109675 | 0.190715 |
| PRUNE1       | 1q21.3        | 0.081972 | 0.109695 | 0.190733 |
| OR5P2        | 11p15.4       | 0.081962 | 0.109738 | 0.190791 |
| MIDN         | 19p13.3       | 0.081959 | 0.10975  | 0.190796 |
| C1ORF43      | 1q21.3        | 0.081941 | 0.109827 | 0.190913 |
| METTL18      | 1q24.2        | 0.081898 | 0.110017 | 0.191219 |
| IFIT5        | 10q23.31      | -0.08189 | 0.110037 | 0.191219 |
| ZNRF1        | 16q23.1       | -0.08189 | 0.110042 | 0.191219 |
| C7ORF26      | 7p22.1        | -0.08189 | 0.110042 | 0.191219 |
| NXF3         | Xq22.1        | 0.081884 | 0.110078 | 0.191265 |
| FRMPD2B      | 10q11.22      | 0.081848 | 0.110235 | 0.191522 |
| MBNL3        | Xq26.2        | 0.081829 | 0.110317 | 0.191648 |
| CDHR4        | 3p21.31       | 0.081812 | 0.110392 | 0.191763 |
| RPN2         | 20q11.23      | -0.08181 | 0.110404 | 0.191766 |
| DLL1         | 6q27          | 0.081801 | 0.110439 | 0.19181  |
| LOC100131496 | 20q13.12      | 0.081773 | 0.110561 | 0.192005 |
| MUC17        | 7q22.1        | 0.081765 | 0.110595 | 0.192048 |
| SEL1L3       | 4p15.2        | -0.08175 | 0.110647 | 0.192121 |
| PCARE        | 2p23.2        | -0.08175 | 0.110683 | 0.192162 |
| YME1L1       | 10p12.1       | 0.081744 | 0.110689 | 0.192162 |
| ACTR6        | 12q23.1       | -0.08172 | 0.110788 | 0.192317 |
| HIP1         | 7q11.23       | -0.08171 | 0.110837 | 0.192385 |
| EMC10        | 19q13.33      | -0.0817  | 0.11087  | 0.192421 |

|           |                 |          |          |          |
|-----------|-----------------|----------|----------|----------|
| CPD       | 17q11.2         | -0.0817  | 0.110877 | 0.192421 |
| CBWD3     | 9q21.11         | 0.081694 | 0.110906 | 0.192454 |
| LIG4      | 13q33.3         | -0.08169 | 0.110916 | 0.192454 |
| JPX       | Xq13.2          | 0.081681 | 0.110963 | 0.19252  |
| ASPRV1    | 2p13.3          | -0.08167 | 0.110997 | 0.192562 |
| LINC00473 | 6q27            | -0.08167 | 0.111019 | 0.192584 |
| CXCR2     | 2q35            | -0.08166 | 0.111047 | 0.192615 |
| NPFFR2    | 4q13.3          | -0.08165 | 0.111093 | 0.192679 |
| GSX2      | 4q12            | -0.08164 | 0.111151 | 0.192763 |
| IP6K1     | 3p21.31         | -0.08161 | 0.111264 | 0.192941 |
| NID1      | 1q42.3          | -0.08161 | 0.111286 | 0.192964 |
| TMEM185B  | 2q14.2          | -0.08159 | 0.111364 | 0.193081 |
| THUMPD2   | 2p22.1 2p22-p21 | 0.081586 | 0.111383 | 0.193098 |
| FAM135B   | 8q24.23         | -0.08158 | 0.111394 | 0.193101 |
| CSAG1     | Xq28            | -0.08158 | 0.111409 | 0.19311  |
| AURKC     | 19q13.43        | -0.08156 | 0.111492 | 0.193237 |
| CNR2      | 1p36.11         | -0.08155 | 0.111525 | 0.193278 |
| FBN3      | 19p13.2         | -0.08155 | 0.111536 | 0.193279 |
| TNIP1     | 5q33.1          | -0.08155 | 0.111548 | 0.193283 |
| ADPGK     | 15q24.1         | 0.081539 | 0.111588 | 0.193321 |
| GLRA1     | 5q33.1          | 0.081537 | 0.111597 | 0.193321 |
| TSPY3     | Yp11.2          | -0.08153 | 0.111607 | 0.193321 |
| NOL7      | 6p23            | 0.081535 | 0.111608 | 0.193321 |
| ZNF223    | 19q13.31        | -0.08151 | 0.111721 | 0.1935   |
| ETV3L     | 1q23.1          | 0.081477 | 0.111861 | 0.193725 |
| CDK4      | 12q14.1         | 0.081427 | 0.112084 | 0.194089 |
| FAM66D    | 8p23.1          | 0.081425 | 0.11209  | 0.194089 |
| DDX53     | Xp22.11         | -0.08141 | 0.112152 | 0.194149 |
| GRM6      | 5q35.3          | -0.08141 | 0.112154 | 0.194149 |
| PIN4      | Xq13.1          | -0.08141 | 0.112154 | 0.194149 |
| RPE       | 2q34            | 0.081401 | 0.112197 | 0.194206 |
| RSPH6A    | 19q13.32        | 0.081398 | 0.112211 | 0.194214 |
| HENMT1    | 1p13.3          | -0.08139 | 0.11224  | 0.194218 |
| NAXE      | 1q22            | 0.081391 | 0.112242 | 0.194218 |
| FAM76A    | 1p35.3          | -0.08139 | 0.112242 | 0.194218 |
| FAHD1     | 16p13.3         | -0.08138 | 0.11227  | 0.194249 |
| TAS2R8    | 12p13.2         | 0.081362 | 0.112372 | 0.194409 |
| NR4A2     | 2q24.1          | 0.081352 | 0.112416 | 0.194463 |
| GOLGA6C   | 15q24.2         | 0.08135  | 0.112423 | 0.194463 |
| VPREB3    | 22q11.23 22q11  | -0.08135 | 0.11244  | 0.194476 |
| POLR3B    | 12q23.3         | 0.081331 | 0.112509 | 0.194579 |
| OBSCN     | 1q42.13         | 0.081318 | 0.112567 | 0.194661 |
| MED12L    | 3q25.1          | -0.08127 | 0.112772 | 0.194999 |
| MBLAC2    | 5q14.3          | -0.08121 | 0.113053 | 0.195468 |
| AK4       | 1p31.3          | -0.08119 | 0.113156 | 0.19563  |
| CXCL1     | 4q13.3          | 0.081174 | 0.113205 | 0.195698 |
| ERP44     | 9q31.1          | -0.08112 | 0.113426 | 0.196062 |
| GFRA2     | 8p21.3          | -0.08111 | 0.113492 | 0.196161 |
| SPX       | 12p12.1         | -0.08109 | 0.113568 | 0.196274 |
| DCUN1D5   | 11q22.3         | 0.081079 | 0.113632 | 0.196367 |
| PRR23C    | 3q23            | -0.08106 | 0.113727 | 0.196516 |
| MTFMT     | 15q22.31        | 0.081051 | 0.113756 | 0.196548 |
| IFI16     | 1q23.1          | -0.08105 | 0.113779 | 0.196571 |
| GPR157    | 1p36.22         | 0.081036 | 0.11382  | 0.196625 |
| UCN3      | 10p15.1         | -0.08103 | 0.113862 | 0.19668  |
| PPM1D     | 17q23.2         | -0.08102 | 0.113877 | 0.19669  |
| CHST13    | 3q21.3          | -0.081   | 0.113979 | 0.196848 |
| SHTN1     | 10q25.3         | 0.080993 | 0.114014 | 0.196893 |

|            |          |          |          |          |
|------------|----------|----------|----------|----------|
| ANXA9      | 1q21.3   | -0.08098 | 0.114061 | 0.196957 |
| CYP2B7P    | 19q13.2  | -0.08098 | 0.114081 | 0.196975 |
| RNF5P1     | 8p11.22  | -0.08097 | 0.114104 | 0.196996 |
| HMGCS2     | 1p12     | -0.08094 | 0.114249 | 0.197216 |
| USP4       | 3p21.31  | -0.08094 | 0.114251 | 0.197216 |
| LDHB       | 12p12.1  | 0.080928 | 0.114308 | 0.197297 |
| LRRC37A2   | 17q21.31 | 0.080906 | 0.114407 | 0.197452 |
| TRIM3      | 11p15.4  | 0.080872 | 0.114557 | 0.197684 |
| C20ORF85   | 20q13.32 | -0.08087 | 0.114562 | 0.197684 |
| DOC2A      | 16p11.2  | 0.080823 | 0.11478  | 0.198045 |
| TRAF3IP2   | 6q21     | 0.080783 | 0.114959 | 0.198337 |
| NETO2      | 16q12.1  | 0.080777 | 0.114987 | 0.198367 |
| WNT5A      | 3p14.3   | -0.08076 | 0.115081 | 0.198512 |
| SLC9A3R1   | 17q25.1  | 0.080737 | 0.115164 | 0.198639 |
| OR3A1      | 17p13.3  | -0.08073 | 0.115212 | 0.198704 |
| FGL1       | 8p22     | -0.08069 | 0.115363 | 0.19894  |
| OR6A2      | 11p15.4  | 0.080692 | 0.115369 | 0.19894  |
| TINAG      | 6p12.1   | -0.08068 | 0.115417 | 0.199006 |
| GPR4       | 19q13.32 | -0.08062 | 0.115717 | 0.199506 |
| KIF25      | 6q27     | -0.08061 | 0.115731 | 0.199513 |
| RXRβ       | 6p21.32  | 0.080597 | 0.115799 | 0.199567 |
| ATXN3      | 14q32.12 | -0.0806  | 0.1158   | 0.199567 |
| CLN3       | 16p12.1  | 0.080597 | 0.115802 | 0.199567 |
| OXGR1      | 13q32.1  | -0.0806  | 0.115802 | 0.199567 |
| SHPRH      | 6q24.3   | 0.08055  | 0.116015 | 0.199916 |
| ACADVL     | 17p13.1  | 0.080545 | 0.116035 | 0.199934 |
| GK3P       | 4q32.3   | 0.080543 | 0.116046 | 0.199936 |
| INSRR      | 1q23.1   | -0.0805  | 0.116251 | 0.200271 |
| NDRG3      | 20q11.23 | -0.08049 | 0.116268 | 0.200277 |
| SH3BGRL3   | 1p36.11  | 0.080493 | 0.116274 | 0.200277 |
| ZNF430     | 19p12    | -0.08048 | 0.116329 | 0.200354 |
| TNNC1      | 3p21.1   | -0.08047 | 0.116387 | 0.200438 |
| LAMB2P1    | 3p21.31  | 0.080453 | 0.116455 | 0.200522 |
| KRTAP5-AS1 | 11p15.5  | 0.080453 | 0.116456 | 0.200522 |
| MAN1A2     | 1p12     | -0.08044 | 0.116534 | 0.200638 |
| MICU2      | 13q12.11 | -0.08041 | 0.116637 | 0.200786 |
| COX15      | 10q24.2  | 0.080412 | 0.11664  | 0.200786 |
| RCVRN      | 17p13.1  | -0.08041 | 0.116656 | 0.200787 |
| MAGEA5     | Xq28     | 0.080408 | 0.116661 | 0.200787 |
| LRPPRC     | 2p21     | 0.080398 | 0.116706 | 0.200847 |
| HCG18      | 6p22.1   | 0.080378 | 0.116796 | 0.200986 |
| CETP       | 16q13    | -0.08037 | 0.116825 | 0.201019 |
| PFN4       | 2p23.3   | -0.08036 | 0.116856 | 0.201054 |
| EFNA5      | 5q21.3   | -0.08035 | 0.11693  | 0.201164 |
| PAX3       | 2q36.1   | -0.08031 | 0.117092 | 0.201427 |
| LSR        | 19q13.12 | 0.080291 | 0.117194 | 0.201583 |
| PEG3-AS1   | 19q13.43 | -0.08027 | 0.117289 | 0.201731 |
| MCTP2      | 15q26.2  | 0.080244 | 0.117409 | 0.201919 |
| PRH2       | 12p13.2  | 0.08024  | 0.117426 | 0.201931 |
| ARL6IP6    | 2q23.3   | -0.08023 | 0.11749  | 0.202023 |
| KLHDC7B    | 22q13.33 | -0.08021 | 0.117586 | 0.202171 |
| PNPLA5     | 22q13.31 | -0.0802  | 0.117618 | 0.202204 |
| LYRM4      | 6p25.1   | -0.0802  | 0.117625 | 0.202204 |
| MKRN1      | 7q34     | -0.08017 | 0.117762 | 0.202423 |
| FAM86FP    | 12p13.31 | 0.080163 | 0.117783 | 0.202425 |
| DCPS       | 11q24.2  | 0.080162 | 0.117784 | 0.202425 |
| AKR1B10    | 7q33     | 0.080159 | 0.117801 | 0.202437 |
| DNAJC22    | 12q13.12 | 0.080156 | 0.117812 | 0.202438 |



|            |          |          |          |          |
|------------|----------|----------|----------|----------|
| TAAR5      | 6q23.2   | -0.08014 | 0.117882 | 0.202524 |
| OR2M2      | 1q44     | -0.08014 | 0.117882 | 0.202524 |
| PLIN2      | 9p22.1   | -0.08014 | 0.117905 | 0.202546 |
| HHLA2      | 3q13.13  | 0.080113 | 0.118012 | 0.202712 |
| VNN2       | 6q23.2   | -0.08007 | 0.118227 | 0.203064 |
| PICSAAR    | 21q22.3  | -0.08006 | 0.11824  | 0.203069 |
| ANGEL1     | 14q24.3  | -0.08006 | 0.118274 | 0.2031   |
| SOX18      | 20q13.33 | -0.08005 | 0.118285 | 0.2031   |
| MACC1      | 7p21.1   | -0.08005 | 0.118289 | 0.2031   |
| MAFA       | 8q24.3   | 0.080047 | 0.118315 | 0.203128 |
| USP54      | 10q22.2  | 0.080044 | 0.118328 | 0.203134 |
| SNORA12    | 10q24.31 | 0.080039 | 0.11835  | 0.203142 |
| ENTPD8     | 9q34.3   | 0.080039 | 0.118353 | 0.203142 |
| SLC10A1    | 14q24.1  | -0.08003 | 0.118405 | 0.203214 |
| PHOSPHO1   | 17q21.32 | -0.08001 | 0.118497 | 0.203355 |
| PHF6       | Xq26.2   | 0.080002 | 0.118524 | 0.203383 |
| CYP21A2    | 6p21.33  | -0.07997 | 0.118657 | 0.203594 |
| MRPS27     | 5q13.2   | 0.079968 | 0.118678 | 0.203612 |
| IWS1       | 2q14.3   | 0.079962 | 0.118708 | 0.203646 |
| WNK4       | 17q21.2  | 0.079957 | 0.118733 | 0.203671 |
| CLIC1      | 6p21.33  | 0.07994  | 0.11881  | 0.203786 |
| APOC1P1    | 19q13.32 | -0.07993 | 0.118841 | 0.203822 |
| KRT78      | 12q13.13 | 0.079922 | 0.118892 | 0.203887 |
| GPR52      | 1q25.1   | 0.07992  | 0.118901 | 0.203887 |
| SLC35C2    | 20q13.12 | -0.07992 | 0.118909 | 0.203887 |
| RPL7       | 8q21.11  | -0.07991 | 0.118955 | 0.203948 |
| PSG4       | 19q13.31 | -0.07989 | 0.119041 | 0.204065 |
| PDHA2      | 4q22.3   | 0.079889 | 0.119044 | 0.204065 |
| LRIG1      | 3p14.1   | -0.07988 | 0.119097 | 0.204138 |
| ZFP30      | 19q13.12 | -0.07986 | 0.119168 | 0.204242 |
| ERMN       | 2q24.1   | -0.07984 | 0.119296 | 0.204444 |
| FASTKD1    | 2q31.1   | 0.079824 | 0.119345 | 0.204512 |
| HCG4B      | 6p22.1   | 0.079807 | 0.119425 | 0.204631 |
| FOXL1      | 16q24.1  | -0.0798  | 0.119445 | 0.204648 |
| TCTE1      | 6p21.1   | 0.079793 | 0.11949  | 0.204708 |
| CHRM5      | 15q14    | 0.079788 | 0.119517 | 0.204735 |
| ICAM5      | 19p13.2  | 0.079785 | 0.119528 | 0.204737 |
| HSPA5      | 9q33.3   | -0.07978 | 0.11955  | 0.20474  |
| UNC5D      | 8p12     | -0.07978 | 0.11955  | 0.20474  |
| ADCY10P1   | 6p21.1   | 0.079778 | 0.119561 | 0.204741 |
| HECTD2-AS1 | 10q23.32 | -0.07975 | 0.119693 | 0.20495  |
| TAF9B      | Xq21.1   | -0.07974 | 0.119719 | 0.204976 |
| TAX1BP1    | 7p15.2   | -0.07974 | 0.119743 | 0.205    |
| ERAL1      | 17q11.2  | 0.079736 | 0.119757 | 0.205007 |
| CYP2C8     | 10q23.33 | 0.079724 | 0.119813 | 0.205078 |
| CPLX1      | 4p16.3   | 0.079723 | 0.119819 | 0.205078 |
| ZNF683     | 1p36.11  | -0.07971 | 0.119885 | 0.205173 |
| PSMB8      | 6p21.32  | 0.07967  | 0.120064 | 0.205462 |
| ENDOU      | 12q13.11 | -0.07967 | 0.120082 | 0.205476 |
| DTWD2      | 5q23.1   | -0.07963 | 0.12025  | 0.205745 |
| RBMY2EP    | Yq11.223 | -0.07963 | 0.120266 | 0.20575  |
| DMP1       | 4q22.1   | -0.07963 | 0.120273 | 0.20575  |
| PPHLN1     | 12q12    | -0.07961 | 0.120353 | 0.205869 |
| POLR2G     | 11q12.3  | -0.07958 | 0.120497 | 0.206098 |
| TBCC       | 6p21.1   | 0.079571 | 0.120527 | 0.206131 |
| KPNA4      | 3q25.33  | -0.07957 | 0.12055  | 0.206152 |
| ASPHD1     | 16p11.2  | -0.07956 | 0.120569 | 0.206167 |
| DHTKD1     | 10p14    | 0.079556 | 0.120597 | 0.206198 |

|           |          |          |          |          |
|-----------|----------|----------|----------|----------|
| FUT8-AS1  | 14q23.3  | -0.07955 | 0.120614 | 0.20621  |
| C10ORF53  | 10q11.23 | -0.07955 | 0.120632 | 0.206223 |
| MPZL2     | 11q23.3  | -0.07953 | 0.120703 | 0.206326 |
| FRMD3     | 9q21.32  | 0.079527 | 0.120731 | 0.206356 |
| MFSD8     | 4q28.2   | -0.07952 | 0.120749 | 0.20637  |
| FRRS1L    | 9q31.3   | -0.0795  | 0.120856 | 0.206536 |
| CRYAA     | 21q22.3  | -0.07948 | 0.120973 | 0.206707 |
| MYCL      | 1p34.2   | -0.07947 | 0.120978 | 0.206707 |
| OPA1      | 3q29     | 0.079446 | 0.121113 | 0.206921 |
| OR2F1     | 7q35     | 0.079443 | 0.121126 | 0.206925 |
| LINC00471 | 2q37.1   | 0.079431 | 0.121182 | 0.207003 |
| ZNF300    | 5q33.1   | -0.07943 | 0.121206 | 0.207026 |
| HESX1     | 3p14.3   | -0.07942 | 0.121226 | 0.207044 |
| RPRD1B    | 20q11.23 | -0.07941 | 0.121273 | 0.207106 |
| DENND4C   | 9p22.1   | -0.07936 | 0.121518 | 0.207507 |
| HDHD5     | 22q11.1  | 0.079354 | 0.121547 | 0.207539 |
| TENT5B    | 1p36.11  | -0.07932 | 0.121689 | 0.207763 |
| LINC02035 | 3q21.1   | -0.07932 | 0.121706 | 0.207763 |
| MOCS3     | 20q13.13 | -0.07932 | 0.12171  | 0.207763 |
| TMEM71    | 8q24.22  | -0.07932 | 0.12172  | 0.207763 |
| SLC1A6    | 19p13.12 | -0.07931 | 0.121733 | 0.207768 |
| CRYBA2    | 2q35     | 0.079295 | 0.121822 | 0.207903 |
| NDUFB1    | 14q32.12 | -0.07929 | 0.12184  | 0.207914 |
| MS4A13    | 11q12.2  | -0.07928 | 0.121876 | 0.207958 |
| PLEKHA1   | 10q26.13 | -0.07926 | 0.121991 | 0.208137 |
| EDDM3B    | 14q11.2  | 0.079252 | 0.122029 | 0.208184 |
| DCAF10    | 9p13.2   | 0.079248 | 0.122047 | 0.208197 |
| BAG4      | 8p11.23  | -0.07924 | 0.122078 | 0.208232 |
| GATAD1    | 7q21.2   | -0.07922 | 0.122179 | 0.208387 |
| TNPO3     | 7q32.1   | 0.079208 | 0.122232 | 0.20846  |
| CASP3     | 4q35.1   | -0.0792  | 0.122278 | 0.20852  |
| IZUMO1R   | 11q21    | -0.0792  | 0.122289 | 0.208521 |
| MAMSTR    | 19q13.33 | -0.07919 | 0.122318 | 0.208554 |
| SLCO1A2   | 12p12.1  | -0.07917 | 0.122403 | 0.20868  |
| ADCY8     | 8q24.22  | -0.07916 | 0.122449 | 0.208741 |
| FER       | 5q21.3   | -0.07913 | 0.12261  | 0.208998 |
| NOSTRIN   | 2q24.3   | 0.079124 | 0.122632 | 0.209017 |
| C5ORF52   | 5q33.3   | 0.079122 | 0.122643 | 0.209018 |
| ARHGEF26  | 3q25.2   | 0.079119 | 0.122656 | 0.209022 |
| PAX2      | 10q24.31 | 0.079096 | 0.122763 | 0.209187 |
| MED12     | Xq13.1   | 0.079093 | 0.122779 | 0.209197 |
| CCDC144CP | 17p11.2  | 0.079082 | 0.122833 | 0.20927  |
| EIF3C     | 16p11.2  | 0.079055 | 0.12296  | 0.209469 |
| LRRC2     | 3p21.31  | -0.07905 | 0.122983 | 0.20949  |
| FLACC1    | 2q33.1   | 0.079046 | 0.123005 | 0.20951  |
| KRTAP12-4 | 21q22.3  | 0.079041 | 0.123029 | 0.209533 |
| TOP1P2    | 22q11.23 | 0.079034 | 0.123061 | 0.209571 |
| CER1      | 9p22.3   | 0.079029 | 0.123085 | 0.209593 |
| PYM1      | 12q13.2  | 0.07902  | 0.123126 | 0.209645 |
| SFTPA1    | 10q22.3  | -0.079   | 0.12322  | 0.209787 |
| NOTCH1    | 9q34.3   | 0.078993 | 0.123253 | 0.209826 |
| NCF1B     | 7q11.23  | -0.07898 | 0.12333  | 0.209938 |
| PLCH2     | 1p36.32  | 0.078971 | 0.123359 | 0.20997  |
| CATSPERD  | 19p13.3  | 0.078968 | 0.123373 | 0.209976 |
| B3GALT6   | 1p36.33  | 0.078955 | 0.123435 | 0.210048 |
| MAN1B1-DT | 9q34.3   | -0.07895 | 0.123446 | 0.210048 |
| RIPPLY2   | 6q14.2   | -0.07895 | 0.123447 | 0.210048 |
| TRAPPC13  | 5q12.3   | -0.07893 | 0.123566 | 0.210233 |

|           |                |          |          |          |
|-----------|----------------|----------|----------|----------|
| BSN       | 3p21.31        | -0.07892 | 0.123619 | 0.210306 |
| CDKN2A    | 9p21.3         | -0.07891 | 0.123643 | 0.210329 |
| TAF1L     | 9p21.1         | 0.078896 | 0.123718 | 0.210436 |
| THEM6     | 8q24.3         | 0.078894 | 0.123727 | 0.210436 |
| RPS16     | 19q13.2        | 0.078892 | 0.123739 | 0.210438 |
| TDRD1     | 10q25.3        | -0.07888 | 0.123793 | 0.210512 |
| ZNF24     | 18q12.2        | -0.07887 | 0.123824 | 0.210548 |
| BLOC1S4   | 4p16.1         | -0.07887 | 0.123856 | 0.210583 |
| HIST1H4K  | 6p22.1         | 0.078848 | 0.123946 | 0.210718 |
| TATDN1    | 8q24.13        | -0.07884 | 0.123984 | 0.210754 |
| MCAT      | 22q13.2        | 0.078837 | 0.123998 | 0.210754 |
| PRSS48    | 4q31.3         | 0.078837 | 0.123998 | 0.210754 |
| LPA       | 6q25.3-q26     | -0.07883 | 0.124038 | 0.210803 |
| RUNDC1    | 17q21.31       | 0.078824 | 0.124063 | 0.210828 |
| HECW2     | 2q32.3         | -0.0788  | 0.124177 | 0.211004 |
| FAM153A   | 5q35.3         | 0.078797 | 0.124191 | 0.21101  |
| NMNAT3    | 3q23           | -0.07879 | 0.124208 | 0.211021 |
| TIGD5     | 8q24.3         | 0.078772 | 0.124309 | 0.211175 |
| HBA2      | 16p13.3        | 0.07873  | 0.124515 | 0.211506 |
| EHD4      | 15q15.1        | -0.07872 | 0.124543 | 0.211536 |
| TMEM106C  | 12q13.11       | 0.078712 | 0.124601 | 0.211616 |
| ATP5PD    | 17q25.1        | -0.0787  | 0.124665 | 0.211707 |
| SMARCC2   | 12q13.2        | 0.078622 | 0.125032 | 0.212313 |
| ZNF81     | Xp11.23        | 0.078607 | 0.125105 | 0.212418 |
| CCDC163   | 1p34.1         | 0.0786   | 0.125138 | 0.212457 |
| CRNKL1    | 20p11.23       | -0.0786  | 0.125156 | 0.212469 |
| CASP9     | 1p36.21        | -0.07859 | 0.125185 | 0.2125   |
| RECQL5    | 17q25.1        | 0.078587 | 0.125201 | 0.21251  |
| CDK15     | 2q33.1         | -0.07858 | 0.125243 | 0.212563 |
| ATP23     | 12q14.1        | 0.078571 | 0.125275 | 0.212599 |
| FAM160B2  | 8p21.3         | 0.078566 | 0.125302 | 0.212627 |
| AP5Z1     | 7p22.1         | 0.078556 | 0.125349 | 0.212688 |
| NBL1      | 1p36.13        | -0.07855 | 0.125372 | 0.212709 |
| NFIB      | 9p23-p22.3     | 0.078545 | 0.125403 | 0.212745 |
| MRPS7     | 17q25.1        | -0.07853 | 0.125486 | 0.212867 |
| LLCFC1    | 7q34           | 0.078511 | 0.125568 | 0.212988 |
| NXT1      | 20p11.21       | -0.07849 | 0.12568  | 0.213151 |
| NCOA7     | 6q22.31-q22.32 | -0.07849 | 0.125686 | 0.213151 |
| LY86-AS1  | 6p25.1         | -0.07846 | 0.125811 | 0.213345 |
| GPR61     | 1p13.3         | 0.078448 | 0.125871 | 0.21343  |
| BEST3     | 12q15          | -0.07844 | 0.125909 | 0.213476 |
| RP9       | 7p14.3         | -0.07843 | 0.125976 | 0.213562 |
| DNAJB8    | 3q21.3         | 0.078425 | 0.125981 | 0.213562 |
| IDNK      | 9q21.32        | -0.07841 | 0.126073 | 0.2137   |
| TXNRD1    | 12q23.3        | 0.078404 | 0.126084 | 0.2137   |
| ACAD11    | 3q22.1         | 0.0784   | 0.126105 | 0.213709 |
| TREX2     | Xq28           | 0.078399 | 0.126111 | 0.213709 |
| SPRR2B    | 1q21.3         | -0.07837 | 0.126229 | 0.213892 |
| OR2S2     | 9p13.3         | 0.078371 | 0.126247 | 0.213892 |
| RPS27A    | 2p16.1         | -0.07837 | 0.126251 | 0.213892 |
| PON1      | 7q21.3         | 0.078365 | 0.126275 | 0.213915 |
| CRLS1     | 20p12.3        | -0.07835 | 0.126334 | 0.213998 |
| OR10G8    | 11q24.2        | -0.07834 | 0.126395 | 0.214083 |
| MRPL13    | 8q24.12        | -0.07833 | 0.126424 | 0.214114 |
| ZNF689    | 16p11.2        | -0.07833 | 0.126444 | 0.214129 |
| RAPGEF5   | 7p15.3         | 0.078322 | 0.126483 | 0.21416  |
| MLH1      | 3p22.2         | -0.07832 | 0.126484 | 0.21416  |
| FOXD2-AS1 | 1p33           | 0.078293 | 0.126622 | 0.214376 |

|             |                 |          |          |          |
|-------------|-----------------|----------|----------|----------|
| ZNF735      | 7q11.21         | -0.07828 | 0.1267   | 0.214491 |
| HOTAIR      | 12q13.13        | 0.078262 | 0.126775 | 0.214584 |
| CR1L        | 1q32.2          | -0.07826 | 0.126777 | 0.214584 |
| CREB5       | 7p15.1          | -0.07825 | 0.126813 | 0.214628 |
| SPTLC2      | 14q24.3         | 0.078243 | 0.126869 | 0.214704 |
| CDK9        | 9q34.11         | 0.078238 | 0.126892 | 0.214725 |
| NECAB2      | 16q23.3         | -0.07821 | 0.127027 | 0.214936 |
| LINC00593   | 15q23           | 0.078203 | 0.127062 | 0.214963 |
| TMEM50B     | 21q22.11        | -0.0782  | 0.127065 | 0.214963 |
| MORC3       | 21q22.12        | -0.07818 | 0.127162 | 0.215108 |
| TSNAX       | 1q42.2          | -0.07818 | 0.127176 | 0.215115 |
| UBXN2A      | 2p23.3          | -0.07817 | 0.127226 | 0.21518  |
| GRIN3B      | 19p13.3         | 0.078165 | 0.127247 | 0.215198 |
| ETV2        | 19q13.12        | 0.078154 | 0.1273   | 0.215269 |
| LARS2       | 3p21.31         | 0.078136 | 0.127387 | 0.215398 |
| C2ORF88     | 2q32.2          | -0.07812 | 0.127443 | 0.215476 |
| MAPRE1      | 20q11.21        | -0.07812 | 0.127474 | 0.215509 |
| SLC27A5     | 19q13.43        | 0.078113 | 0.127503 | 0.215541 |
| EGFL6       | Xp22.2          | -0.0781  | 0.127551 | 0.21559  |
| CDC42EP4    | 17q25.1         | -0.0781  | 0.127554 | 0.21559  |
| CFAP300     | 11q22.1         | -0.07809 | 0.12762  | 0.215682 |
| POM121L10P  | 22q11.23        | 0.078062 | 0.127753 | 0.215889 |
| SCAND2P     | 15q25.2         | 0.078002 | 0.128043 | 0.216332 |
| TTC22       | 1p32.3          | 0.078002 | 0.128045 | 0.216332 |
| PRELID3B    | 20q13.32        | -0.078   | 0.128047 | 0.216332 |
| ZNF556      | 19p13.3         | -0.07798 | 0.128161 | 0.216506 |
| TXLNA       | 1p35.2          | 0.077965 | 0.128225 | 0.216596 |
| SNHG29      | 17p11.2         | -0.07795 | 0.128304 | 0.216711 |
| GTF3C6      | 6q21            | -0.07794 | 0.128338 | 0.216737 |
| CCDC88B     | 11q13.1         | 0.077942 | 0.128341 | 0.216737 |
| BID         | 22q11.21        | -0.07793 | 0.1284   | 0.216819 |
| BSPH1       | 19q13.33        | -0.07792 | 0.128461 | 0.216903 |
| MPIG6B      | 6p21.33         | 0.077914 | 0.128475 | 0.216904 |
| ANTXRL      | 10q11.22        | 0.077913 | 0.128483 | 0.216904 |
| HSF2BP      | 21q22.3         | -0.07789 | 0.128601 | 0.217085 |
| LMO4        | 1p22.3          | -0.07788 | 0.128645 | 0.217141 |
| DEFB124     | 20q11.21        | -0.07786 | 0.12872  | 0.217248 |
| DLST        | 14q24.3         | 0.077861 | 0.128737 | 0.21726  |
| INSYN2A     | 10q26.2         | -0.07784 | 0.128836 | 0.217408 |
| TKTL2       | 4q32.2          | 0.077835 | 0.128865 | 0.21743  |
| ANXA3       | 4q21.21         | -0.07783 | 0.128871 | 0.21743  |
| ORC5        | 7q22.1-q22.2    | -0.07781 | 0.129013 | 0.217652 |
| SESTD1      | 2q31.2          | -0.0778  | 0.129034 | 0.217669 |
| CCNT1       | 12q13.11-q13.12 | 0.077793 | 0.129074 | 0.217717 |
| NOL10       | 2p25.1          | 0.07779  | 0.129086 | 0.21772  |
| SFN         | 1p36.11         | 0.077778 | 0.129145 | 0.217795 |
| ADCY7       | 16q12.1         | 0.077777 | 0.129152 | 0.217795 |
| ZNF419      | 19q13.43        | -0.07775 | 0.129275 | 0.217983 |
| PAX5        | 9p13.2          | 0.077748 | 0.129296 | 0.218    |
| PNPLA3      | 22q13.31        | 0.077741 | 0.129329 | 0.218038 |
| GABRA6      | 5q34            | -0.07773 | 0.129369 | 0.218087 |
| MED6        | 14q24.2         | -0.07772 | 0.129438 | 0.218182 |
| MRPS28      | 8q21.13         | -0.07772 | 0.129447 | 0.218182 |
| PDPR        | 16q22.1         | 0.0777   | 0.12953  | 0.218284 |
| DYNC1LI2    | 16q22.1         | -0.0777  | 0.129535 | 0.218284 |
| ENAM        | 4q13.3          | -0.0777  | 0.129543 | 0.218284 |
| RPL37       | 5p13.1          | -0.0777  | 0.129551 | 0.218284 |
| SLC26A4-AS1 | 7q22.3          | -0.07767 | 0.129697 | 0.218511 |

|          |              |          |          |          |
|----------|--------------|----------|----------|----------|
| HARS2    | 5q31.3       | 0.077656 | 0.12975  | 0.218581 |
| CXADR    | 21q21.1      | -0.07762 | 0.129909 | 0.218831 |
| SMARCA5  | 4q31.21      | -0.0776  | 0.130049 | 0.219041 |
| MSS51    | 10q22.2      | -0.07759 | 0.130055 | 0.219041 |
| CTSE     | 1q32.1       | 0.077581 | 0.13012  | 0.219131 |
| PTGR2    | 14q24.3      | -0.07755 | 0.130292 | 0.219403 |
| KNCN     | 1p33         | -0.07752 | 0.130403 | 0.219571 |
| COP1     | 1q25.1-q25.2 | 0.077521 | 0.130422 | 0.219585 |
| PTPRB    | 12q15        | -0.07751 | 0.130456 | 0.219601 |
| ADRM1    | 20q13.33     | 0.077514 | 0.130457 | 0.219601 |
| COL9A3   | 20q13.33     | -0.07751 | 0.130465 | 0.219601 |
| SOWAHD   | Xq24         | 0.077501 | 0.130522 | 0.219679 |
| NRIP2    | 12p13.33     | -0.0775  | 0.130542 | 0.219694 |
| SCRN1    | 7p14.3       | -0.07749 | 0.130586 | 0.21975  |
| MMP28    | 17q12        | -0.07748 | 0.130624 | 0.219796 |
| PSMD12   | 17q24.2      | 0.07746  | 0.130725 | 0.219948 |
| OR8G5    | 11q24.2      | -0.07744 | 0.130821 | 0.22009  |
| CCT6B    | 17q12        | -0.07743 | 0.130866 | 0.220147 |
| SPATA21  | 1p36.13      | -0.07738 | 0.131107 | 0.220533 |
| CDH3     | 16q22.1      | 0.077381 | 0.131117 | 0.220533 |
| SAR1A    | 10q22.1      | -0.07737 | 0.131155 | 0.220563 |
| METAP1D  | 2q31.1       | 0.077373 | 0.131157 | 0.220563 |
| ZNF232   | 17p13.2      | 0.077355 | 0.131249 | 0.220698 |
| MYOD1    | 11p15.1      | -0.07735 | 0.131288 | 0.220745 |
| CLTC     | 17q23.1      | -0.07733 | 0.131352 | 0.220835 |
| BRCC3    | Xq28         | 0.077324 | 0.131403 | 0.220902 |
| GSDMB    | 17q21.1      | 0.077311 | 0.131468 | 0.220993 |
| DPPA2P3  | 3q29         | 0.077267 | 0.13169  | 0.221348 |
| KIAA1586 | 6p12.1       | -0.07726 | 0.13174  | 0.221413 |
| SSBP3    | 1p32.3       | -0.07725 | 0.13177  | 0.221445 |
| GKN1     | 2p13.3       | -0.07725 | 0.131798 | 0.221473 |
| HCG9     | 6p22.1       | 0.077227 | 0.131891 | 0.22161  |
| SAYS1D   | 6p21.2       | -0.07722 | 0.131928 | 0.221655 |
| ITGB3BP  | 1p31.3       | 0.077215 | 0.131949 | 0.22167  |
| MLLT10   | 10p12.31     | 0.077212 | 0.131967 | 0.221683 |
| OR2T33   | 1q44         | 0.0772   | 0.132027 | 0.221765 |
| HPR      | 16q22.2      | -0.07719 | 0.132086 | 0.221846 |
| WNK3     | Xp11.22      | -0.07717 | 0.132154 | 0.221941 |
| SLC27A1  | 19p13.11     | -0.07715 | 0.132269 | 0.222115 |
| MYRIP    | 3p22.1       | -0.07714 | 0.13231  | 0.222151 |
| HTR3C    | 3q27.1       | -0.07714 | 0.132312 | 0.222151 |
| RFT1     | 3p21.1       | 0.077127 | 0.132393 | 0.222267 |
| FBXO21   | 12q24.22     | -0.07712 | 0.132404 | 0.222267 |
| PHLPP1   | 18q21.33     | 0.077111 | 0.132472 | 0.222364 |
| RFPL3    | 22q12.3      | 0.077103 | 0.132513 | 0.222396 |
| DNAJB11  | 3q27.3       | 0.077103 | 0.132514 | 0.222396 |
| ICAM4    | 19p13.2      | -0.07706 | 0.132732 | 0.222743 |
| HECTD3   | 1p34.1       | 0.077053 | 0.132765 | 0.222781 |
| ACTN3    | 11q13.2      | -0.07704 | 0.132808 | 0.222834 |
| ANKRD26  | 10p12.1      | 0.077036 | 0.132849 | 0.222867 |
| CBLL1    | 7q22.3       | -0.07704 | 0.13285  | 0.222867 |
| NDUFAF4  | 6q16.1       | 0.077029 | 0.132885 | 0.222895 |
| RPS10    | 6p21.31      | 0.077028 | 0.132889 | 0.222895 |
| WDR83    | 19p13.13     | 0.077025 | 0.132905 | 0.222904 |
| MRPL16   | 11q12.1      | 0.076993 | 0.133068 | 0.223159 |
| GUCY2D   | 17p13.1      | -0.07699 | 0.133104 | 0.223199 |
| SNORA46  | 16q21        | 0.076984 | 0.133115 | 0.2232   |
| PMS2     | 7p22.1       | 0.076979 | 0.133138 | 0.22322  |

|              |                |          |          |          |
|--------------|----------------|----------|----------|----------|
| MACF1        | 1p34.3         | -0.07693 | 0.133386 | 0.223617 |
| ATF5         | 19q13.33       | -0.07692 | 0.133418 | 0.223651 |
| HSP90AB2P    | 4p15.33        | 0.076917 | 0.133451 | 0.223687 |
| NUDT16       | 3q22.1         | 0.076912 | 0.133477 | 0.223713 |
| MTHFS        | 15q25.1        | -0.07688 | 0.133636 | 0.223955 |
| TANC1        | 2q24.2         | 0.076879 | 0.133644 | 0.223955 |
| ASH2L        | 8p11.23        | -0.07686 | 0.133717 | 0.224059 |
| IDI2         | 10p15.3        | 0.076847 | 0.133809 | 0.224194 |
| NUDT16L1     | 16p13.3        | -0.07684 | 0.133821 | 0.224195 |
| CNGB3        | 8q21.3         | -0.07683 | 0.133903 | 0.224314 |
| FLJ12825     | 12q13.13       | 0.076811 | 0.133992 | 0.224427 |
| EDDM3A       | 14q11.2        | -0.07681 | 0.133993 | 0.224427 |
| TMEM8A       | 16p13.3        | 0.076788 | 0.134105 | 0.224596 |
| TMED6        | 16q22.1        | -0.07677 | 0.134175 | 0.224695 |
| ZNF551       | 19q13.43       | 0.076763 | 0.134236 | 0.224778 |
| ATP4A        | 19q13.12       | -0.07675 | 0.134305 | 0.224875 |
| ZNF674       | Xp11.3         | -0.07675 | 0.134324 | 0.224888 |
| NPY2R        | 4q32.1         | -0.07674 | 0.134356 | 0.224918 |
| PROKR2       | 20p12.3        | 0.076737 | 0.134368 | 0.224918 |
| SLC25A52     | 18q12.1        | 0.076735 | 0.134376 | 0.224918 |
| ZBTB9        | 6p21.32        | 0.076713 | 0.134491 | 0.225091 |
| TDH          | 8p23.1         | 0.076708 | 0.134512 | 0.225108 |
| CSNK1E       | 22q13.1        | 0.076698 | 0.134564 | 0.225173 |
| MYT1         | 20q13.33       | -0.0767  | 0.134573 | 0.225173 |
| ZBED9        | 6p22.1         | -0.07667 | 0.134711 | 0.225386 |
| SLCO5A1      | 8q13.3         | -0.07665 | 0.134801 | 0.225516 |
| PIGN         | 18q21.33       | -0.07662 | 0.134973 | 0.225785 |
| ERCC5        | 13q33.1        | 0.07661  | 0.135016 | 0.225838 |
| PAX6         | 11p13          | 0.0766   | 0.135067 | 0.225903 |
| SCN8A        | 12q13.13       | -0.0766  | 0.135077 | 0.225903 |
| CLDND2       | 19q13.41       | 0.076594 | 0.135097 | 0.225918 |
| LOC100128573 | 19p13.2        | 0.076575 | 0.135194 | 0.226061 |
| GABRP        | 5q35.1         | -0.07657 | 0.135229 | 0.2261   |
| HACD3        | 15q22.31       | 0.076548 | 0.135329 | 0.226234 |
| LRP5         | 11q13.2        | 0.076548 | 0.135332 | 0.226234 |
| IL18         | 11q23.1        | -0.07654 | 0.135391 | 0.226315 |
| IFNW1        | 9p21.3         | -0.07652 | 0.13546  | 0.226412 |
| RAPH1        | 2q33.2         | 0.076513 | 0.135511 | 0.226474 |
| SSH1         | 12q24.11       | -0.07651 | 0.13552  | 0.226474 |
| FKSG29       | 13q32.3        | 0.076504 | 0.135557 | 0.226504 |
| IL25         | 14q11.2        | -0.0765  | 0.135564 | 0.226504 |
| GMFB         | 14q22.2        | -0.0765  | 0.135572 | 0.226504 |
| C14ORF180    | 14q32.33       | -0.07647 | 0.135729 | 0.226747 |
| PRXL2A       | 10q23.1        | -0.07645 | 0.135834 | 0.226903 |
| SLAIN1       | 13q22.3        | -0.07645 | 0.135846 | 0.226904 |
| PGM2         | 4p14           | 0.076442 | 0.135873 | 0.226932 |
| SAMD12       | 8q24.11-q24.12 | 0.076432 | 0.135928 | 0.226981 |
| VDAC1        | 5q31.1         | 0.076431 | 0.135929 | 0.226981 |
| CCNQ         | Xq28           | 0.076425 | 0.135964 | 0.226981 |
| OR1S2        | 11q12.1        | 0.076424 | 0.135965 | 0.226981 |
| OR7G3        | 19p13.2        | 0.076424 | 0.135965 | 0.226981 |
| ARSA         | 22q13.33       | -0.07642 | 0.135971 | 0.226981 |
| RUBCNL       | 13q14.13       | -0.07642 | 0.136004 | 0.227017 |
| HSPG2        | 1p36.12        | -0.0764  | 0.136069 | 0.227107 |
| WNK2         | 9q22.31        | 0.0764   | 0.136088 | 0.227119 |
| ZBTB6        | 9q33.2         | -0.07639 | 0.136161 | 0.227222 |
| KRT7         | 12q13.13       | -0.07636 | 0.136282 | 0.227382 |
| WASF2        | 1p36.11        | 0.07636  | 0.136294 | 0.227382 |

|           |                 |          |          |          |
|-----------|-----------------|----------|----------|----------|
| MGST3     | 1q24.1          | 0.07636  | 0.136295 | 0.227382 |
| IER3      | 6p21.33         | 0.076358 | 0.136305 | 0.227382 |
| CUX2      | 12q24.11-q24.12 | -0.07636 | 0.136313 | 0.227382 |
| LRRTM3    | 10q21.3         | -0.07633 | 0.136451 | 0.227582 |
| PSME3     | 17q21.31        | 0.076329 | 0.136456 | 0.227582 |
| FAM183BP  | 7p14.1          | 0.076307 | 0.136567 | 0.227748 |
| TDRD6     | 6p12.3          | 0.076285 | 0.13668  | 0.227907 |
| CELF4     | 18q12.2         | -0.07628 | 0.136685 | 0.227907 |
| SULT2A1   | 19q13.33        | -0.07626 | 0.136814 | 0.228103 |
| CAST      | 5q15            | -0.07625 | 0.136868 | 0.228174 |
| MMUT      | 6p12.3          | -0.07625 | 0.136888 | 0.228188 |
| CABS1     | 4q13.3          | 0.076232 | 0.136955 | 0.228266 |
| PLAC4     | 21q22.2         | 0.07623  | 0.136967 | 0.228266 |
| IPO13     | 1p34.1          | 0.07623  | 0.136969 | 0.228266 |
| TCFL5     | 20q13.33        | 0.076215 | 0.137042 | 0.22837  |
| NECAP1    | 12p13.31        | -0.0762  | 0.137099 | 0.228445 |
| ZCCHC4    | 4p15.2          | -0.0762  | 0.137136 | 0.228487 |
| RPA2      | 1p35.3          | -0.07619 | 0.137169 | 0.228524 |
| STEAP1    | 7q21.13         | -0.07618 | 0.137213 | 0.228577 |
| INTS13    | 12p11.23        | 0.076149 | 0.137388 | 0.22885  |
| CFAP52    | 17p13.1         | 0.076136 | 0.137454 | 0.228942 |
| NFS1      | 20q11.22        | -0.07613 | 0.137497 | 0.228979 |
| TTY6      | Yq11.223        | -0.07613 | 0.1375   | 0.228979 |
| TRUB2     | 9q34.11         | 0.076123 | 0.137522 | 0.228998 |
| TMEM171   | 5q13.2          | 0.07612  | 0.137536 | 0.229002 |
| EXOC3     | 5p15.33         | -0.07612 | 0.137557 | 0.229018 |
| MGLL      | 3q21.3          | -0.0761  | 0.137615 | 0.229095 |
| SFTA3     | 14q13.3         | -0.07609 | 0.137713 | 0.22924  |
| IL21      | 4q27            | -0.07608 | 0.137731 | 0.229245 |
| ACACB     | 12q24.11        | -0.07608 | 0.137739 | 0.229245 |
| MEG3      | 14q32.2         | 0.076077 | 0.13776  | 0.229261 |
| COL4A3BP  | 5q13.3          | -0.07607 | 0.137798 | 0.229305 |
| TMEM203   | 9q34.3          | 0.076059 | 0.137852 | 0.229375 |
| RP2       | Xp11.3          | -0.07606 | 0.13787  | 0.229386 |
| B4GALNT3  | 12p13.33        | 0.076053 | 0.137885 | 0.229393 |
| ANXA11    | 10q22.3         | 0.076036 | 0.13797  | 0.229515 |
| RPGRIP1   | 14q11.2         | -0.07601 | 0.138088 | 0.229692 |
| SPACA9    | 9q34.13         | -0.07599 | 0.138203 | 0.22986  |
| LRRFIP1   | 2q37.3          | 0.07599  | 0.138212 | 0.22986  |
| AOC2      | 17q21.31        | 0.075983 | 0.138246 | 0.229897 |
| CTDSP1    | 2q35            | -0.07597 | 0.138304 | 0.229975 |
| OR4D11    | 11q12.1         | 0.07596  | 0.138368 | 0.230061 |
| KANK3     | 19p13.2         | -0.07595 | 0.138437 | 0.230158 |
| ZBTB39    | 12q13.3         | 0.075935 | 0.138497 | 0.230238 |
| ZNF26     | 12q24.33        | 0.07592  | 0.138575 | 0.230349 |
| RAB3C     | 5q11.2          | -0.0759  | 0.138656 | 0.230464 |
| LZTS3     | 20p13           | -0.07589 | 0.138706 | 0.230528 |
| CRYGD     | 2q33.3          | 0.075874 | 0.138813 | 0.230685 |
| LTK       | 15q15.1         | 0.075872 | 0.138824 | 0.230685 |
| TEX43     | 5q23.2          | -0.07585 | 0.138939 | 0.230841 |
| CPB1      | 3q24            | -0.07585 | 0.13894  | 0.230841 |
| SP140     | 2q37.1          | -0.07584 | 0.139005 | 0.230929 |
| COLCA2    | 11q23.1         | 0.075833 | 0.139029 | 0.230941 |
| CDC123    | 10p14-p13       | 0.075832 | 0.139035 | 0.230941 |
| RFLNA     | 12q24.31        | 0.075829 | 0.139048 | 0.230944 |
| TNFRSF10A | 8p21.3          | 0.075817 | 0.139115 | 0.231035 |
| ZNF35     | 3p21.31         | -0.07578 | 0.139323 | 0.231345 |
| SIL1      | 5q31.2          | -0.07578 | 0.139324 | 0.231345 |

|              |              |          |          |          |
|--------------|--------------|----------|----------|----------|
| USP6NL       | 10p14        | 0.075772 | 0.139349 | 0.231367 |
| ST6GALNAC4   | 9q34.11      | 0.07576  | 0.139411 | 0.23145  |
| DHRS4-AS1    | 14q11.2      | -0.07573 | 0.139552 | 0.231665 |
| GSE1         | 16q24.1      | 0.075723 | 0.139607 | 0.231738 |
| ZMYND11      | 10p15.3      | -0.07572 | 0.139621 | 0.231741 |
| THEM5        | 1q21.3       | 0.075705 | 0.139697 | 0.231848 |
| MAPRE3       | 2p23.3       | -0.0757  | 0.139715 | 0.231858 |
| RNF113A      | Xq24         | -0.07569 | 0.139767 | 0.231925 |
| S100A1       | 1q21.3       | 0.075671 | 0.139879 | 0.232092 |
| BAGE2        | 21p11.2      | 0.075667 | 0.139901 | 0.232098 |
| LOC100270746 | 6p22.2       | 0.075666 | 0.139906 | 0.232098 |
| DGCR2        | 22q11.21     | -0.07566 | 0.139944 | 0.232127 |
| KPNA7        | 7q22.1       | -0.07566 | 0.139957 | 0.232127 |
| PABPC4       | 1p34.3       | 0.075656 | 0.139958 | 0.232127 |
| XKR3         | 22q11.1      | -0.07563 | 0.140114 | 0.232367 |
| GALNT7       | 4q34.1       | -0.07562 | 0.140158 | 0.232416 |
| ZNF445       | 3p21.31      | 0.075616 | 0.140167 | 0.232416 |
| MGC15885     | 15q22.2      | 0.075612 | 0.140188 | 0.232432 |
| ACADSB       | 10q26.13     | -0.0756  | 0.140267 | 0.232543 |
| TOR1B        | 9q34.11      | 0.075577 | 0.140374 | 0.232702 |
| TARP         | 7p14.1       | -0.07556 | 0.140444 | 0.232798 |
| SMG6         | 17p13.3      | -0.07556 | 0.140459 | 0.232804 |
| DHRS2        | 14q11.2      | -0.07555 | 0.140501 | 0.232855 |
| ATP1A4       | 1q23.2       | -0.07555 | 0.140533 | 0.232871 |
| STAG2        | Xq25         | -0.07555 | 0.140534 | 0.232871 |
| FGF16        | Xq21.1       | -0.07554 | 0.140568 | 0.232904 |
| ATP11B       | 3q26.33      | 0.075538 | 0.140577 | 0.232904 |
| SRSF9        | 12q24.31     | 0.075529 | 0.140626 | 0.232965 |
| ITGA6        | 2q31.1       | -0.07552 | 0.140689 | 0.233038 |
| RBP4         | 10q23.33     | -0.07551 | 0.140704 | 0.233038 |
| SNTB2        | 16q22.1      | 0.075513 | 0.140708 | 0.233038 |
| DOLK         | 9q34.11      | 0.075512 | 0.140717 | 0.233038 |
| CYP2B6       | 19q13.2      | -0.0755  | 0.140752 | 0.233077 |
| SCARNA14     | 15q22.31     | -0.0755  | 0.140803 | 0.233142 |
| PPIAL4C      | 1q21.2       | 0.075489 | 0.140834 | 0.233175 |
| SLC13A5      | 17p13.1      | -0.07548 | 0.140859 | 0.233196 |
| CCDC112      | 5q22.3       | 0.075469 | 0.140939 | 0.233311 |
| ZNF138       | 7q11.21      | 0.075463 | 0.140975 | 0.23335  |
| NMNAT2       | 1q25.3       | -0.07545 | 0.14102  | 0.233405 |
| PDE4D        | 5q11.2-q12.1 | -0.07545 | 0.141057 | 0.233447 |
| SMCO2        | 12p11.23     | 0.075394 | 0.141339 | 0.233894 |
| HOXB4        | 17q21.32     | 0.075384 | 0.14139  | 0.23396  |
| ALDH3B1      | 11q13.2      | 0.075381 | 0.141406 | 0.233967 |
| CLTB         | 5q35.2       | 0.075372 | 0.141455 | 0.234029 |
| POTEF        | 2q21.1       | -0.07536 | 0.141524 | 0.234123 |
| SYTL1        | 1p36.11      | 0.075333 | 0.141659 | 0.234324 |
| PLEKHD1      | 14q24.1      | 0.075332 | 0.141668 | 0.234324 |
| CDIPTOSP     | 16p11.2      | -0.07531 | 0.141783 | 0.234472 |
| NRTN         | 19p13.3      | 0.075308 | 0.141792 | 0.234472 |
| FSTL3        | 19p13.3      | -0.07531 | 0.141793 | 0.234472 |
| GGPS1        | 1q42.3       | -0.0753  | 0.141842 | 0.234533 |
| ZFP91-CNTF   | 11q12.1      | 0.07529  | 0.141887 | 0.234588 |
| SLC9A8       | 20q13.13     | 0.075245 | 0.142126 | 0.234964 |
| WDR25        | 14q32.2      | -0.07523 | 0.142191 | 0.235053 |
| MLIP         | 6p12.1       | -0.0752  | 0.142343 | 0.235284 |
| RALA         | 7p14.1       | -0.07519 | 0.142446 | 0.235435 |
| SPACA6       | 19q13.41     | 0.075181 | 0.142468 | 0.235452 |
| PPP1R2C      | Xp11.3       | -0.07518 | 0.142486 | 0.235462 |



|            |             |          |          |          |
|------------|-------------|----------|----------|----------|
| VTCN1      | 1p13.1-p12  | -0.07516 | 0.142592 | 0.235618 |
| ZNRF4      | 19p13.3     | -0.07514 | 0.142669 | 0.235726 |
| CGB1       | 19q13.33    | -0.07514 | 0.142688 | 0.235737 |
| MSANTD3    | 9q31.1      | -0.07513 | 0.14272  | 0.235772 |
| SYVN1      | 11q13.1     | 0.07513  | 0.14274  | 0.235784 |
| ASIC2      | 17q11.2-q12 | -0.07508 | 0.143031 | 0.236245 |
| ADAM32     | 8p11.22     | -0.07504 | 0.143219 | 0.236537 |
| AQP12A     | 2q37.3      | 0.075032 | 0.143266 | 0.236594 |
| SPTBN4     | 19q13.2     | -0.07503 | 0.143285 | 0.236606 |
| URAD       | 13q12.2     | 0.075006 | 0.143405 | 0.236785 |
| NCOA2      | 8q13.3      | -0.07499 | 0.143466 | 0.236866 |
| TIPARP-AS1 | 3q25.31     | -0.07499 | 0.143489 | 0.236885 |
| CCDC13     | 3p22.1      | -0.07496 | 0.143635 | 0.237107 |
| NTHL1      | 16p13.3     | 0.074949 | 0.143707 | 0.237205 |
| CCL18      | 17q12       | -0.07494 | 0.143745 | 0.237248 |
| TIMM10     | 11q12.1     | 0.074935 | 0.143785 | 0.237296 |
| RPS6KC1    | 1q32.3      | -0.07493 | 0.143835 | 0.237343 |
| PNCK       | Xq28        | -0.07492 | 0.143837 | 0.237343 |
| KIN        | 10p14       | -0.0749  | 0.143976 | 0.237551 |
| FLOT1      | 6p21.33     | -0.07488 | 0.144067 | 0.237683 |
| BRWD1      | 21q22.2     | 0.074861 | 0.144179 | 0.237848 |
| ZKSCAN2    | 16p12.1     | -0.07485 | 0.144217 | 0.237877 |
| RAB14      | 9q33.2      | -0.07485 | 0.144221 | 0.237877 |
| IL36B      | 2q14.1      | -0.07485 | 0.144246 | 0.2379   |
| DIPK1C     | 18q22.3     | -0.07484 | 0.144289 | 0.237951 |
| KLHL21     | 1p36.31     | 0.074835 | 0.144321 | 0.237985 |
| EGF        | 4q25        | 0.074823 | 0.144382 | 0.238065 |
| TMEM132D   | 12q24.33    | -0.07481 | 0.144429 | 0.238122 |
| XRN1       | 3q23        | -0.07473 | 0.144872 | 0.238822 |
| PGRMC1     | Xq24        | -0.07473 | 0.144877 | 0.238822 |
| SAP18      | 13q12.11    | -0.07472 | 0.144926 | 0.238883 |
| NOB1       | 16q22.1     | -0.07471 | 0.14497  | 0.238936 |
| TTC23      | 15q26.3     | -0.0747  | 0.145041 | 0.239016 |
| ENHO       | 9p13.3      | -0.0747  | 0.145042 | 0.239016 |
| CDH17      | 8q22.1      | -0.07469 | 0.145084 | 0.239064 |
| CXORF51A   | Xq27.3      | -0.07469 | 0.145122 | 0.239109 |
| CSNK1A1L   | 13q13.3     | -0.07468 | 0.14514  | 0.239118 |
| C2ORF68    | 2p11.2      | -0.07466 | 0.145259 | 0.239295 |
| REM2       | 14q11.2     | 0.074641 | 0.145366 | 0.239451 |
| MT1DP      | 16q13       | -0.07463 | 0.145405 | 0.239495 |
| HIBADH     | 7p15.2      | -0.07462 | 0.145465 | 0.239575 |
| VCY        | Yq11.221    | 0.074612 | 0.145522 | 0.239648 |
| ARR3       | Xq13.1      | 0.074605 | 0.145562 | 0.239695 |
| AKAP13     | 15q25.3     | -0.0746  | 0.145592 | 0.239724 |
| MISP       | 19p13.3     | 0.074597 | 0.145604 | 0.239724 |
| PSME1      | 14q12       | -0.07457 | 0.145775 | 0.239987 |
| VCPIP1     | 8q13.1      | -0.07455 | 0.14585  | 0.24009  |
| SNX12      | Xq13.1      | -0.07455 | 0.145873 | 0.240109 |
| CEP70      | 3q22.3      | 0.07447  | 0.146295 | 0.240782 |
| SLC23A1    | 5q31.2      | -0.07447 | 0.146307 | 0.240782 |
| ATG12      | 5q22.3      | -0.07446 | 0.146342 | 0.240821 |
| XYLB       | 3p22.2      | 0.074435 | 0.146481 | 0.24103  |
| ACRBP      | 12p13.31    | -0.07443 | 0.146495 | 0.241033 |
| ZNRF3      | 22q12.1     | -0.07442 | 0.14656  | 0.241119 |
| C7ORF50    | 7p22.3      | 0.074411 | 0.146613 | 0.241188 |
| LARP7      | 4q25        | -0.07439 | 0.146722 | 0.241348 |
| UBE2D2     | 5q31.2      | -0.07438 | 0.146775 | 0.241415 |
| AASDH      | 4q12        | -0.07435 | 0.146931 | 0.241652 |

|           |          |          |          |          |
|-----------|----------|----------|----------|----------|
| GLYATL1   | 11q12.1  | -0.07435 | 0.146944 | 0.241653 |
| ADTRP     | 6p24.1   | 0.07432  | 0.14711  | 0.241905 |
| SOX12     | 20p13    | 0.074316 | 0.14713  | 0.241918 |
| TTL       | 2q14.1   | 0.074309 | 0.147171 | 0.241966 |
| NSL1      | 1q32.3   | -0.0743  | 0.147211 | 0.242009 |
| KCNA6     | 12p13.32 | -0.0743  | 0.147221 | 0.242009 |
| ARHGAP26  | 5q31.3   | 0.074297 | 0.147237 | 0.242015 |
| MED24     | 17q21.1  | 0.074292 | 0.147262 | 0.242037 |
| SOCS6     | 18q22.2  | -0.07428 | 0.147313 | 0.2421   |
| ZNF512    | 2p23.3   | -0.07424 | 0.147551 | 0.242472 |
| SUMO4     | 6q25.1   | 0.07423  | 0.147603 | 0.242537 |
| FAM71F2   | 7q32.1   | 0.074221 | 0.147651 | 0.242596 |
| PLGLB2    | 2p11.2   | 0.074215 | 0.147681 | 0.242626 |
| CANX      | 5q35.3   | -0.07418 | 0.147884 | 0.242939 |
| AATF      | 17q12    | 0.07415  | 0.148041 | 0.243177 |
| C11ORF94  | 11p11.2  | 0.074128 | 0.148161 | 0.243355 |
| CIC       | 19q13.2  | 0.074118 | 0.148217 | 0.243426 |
| CYP2C18   | 10q23.33 | 0.074099 | 0.14832  | 0.243575 |
| NPLOC4    | 17q25.3  | 0.074095 | 0.148343 | 0.243594 |
| ZNF117    | 7q11.21  | 0.07405  | 0.148588 | 0.243976 |
| IFNK      | 9p21.2   | 0.074045 | 0.148619 | 0.244006 |
| GDI1      | Xq28     | 0.074042 | 0.148634 | 0.244012 |
| GDAP2     | 1p12     | -0.07404 | 0.148662 | 0.244037 |
| TRIM37    | 17q22    | 0.07403  | 0.148696 | 0.24407  |
| VAV2      | 9q34.2   | 0.074028 | 0.14871  | 0.24407  |
| CT47A1    | Xq24     | 0.074026 | 0.148719 | 0.24407  |
| CCR10     | 17q21.2  | -0.07402 | 0.14874  | 0.244085 |
| DPP10     | 2q14.1   | -0.07401 | 0.148799 | 0.244161 |
| GNPDA1    | 5q31.3   | -0.07396 | 0.149074 | 0.244593 |
| PEX1      | 7q21.2   | 0.073948 | 0.149148 | 0.244694 |
| OR52I1    | 11p15.4  | -0.07394 | 0.149196 | 0.244754 |
| ANKRD18DP | 3q29     | 0.073933 | 0.149231 | 0.244791 |
| TSPAN8    | 12q21.1  | -0.07393 | 0.149253 | 0.244807 |
| PLP2      | Xp11.23  | 0.073914 | 0.149338 | 0.244926 |
| PCDHAC2   | 5q31.3   | -0.07391 | 0.149371 | 0.244954 |
| GPR174    | Xq21.1   | -0.07391 | 0.14938  | 0.244954 |
| DPH1      | 17p13.3  | 0.073889 | 0.149477 | 0.245094 |
| ZNF594    | 17p13.2  | 0.073875 | 0.149551 | 0.24518  |
| PRB2      | 12p13.2  | -0.07387 | 0.149554 | 0.24518  |
| ZNF439    | 19p13.2  | -0.07386 | 0.149614 | 0.245258 |
| PLET1     | 11q23.1  | 0.073859 | 0.149643 | 0.245285 |
| ITGA2     | 5q11.2   | 0.073841 | 0.149742 | 0.245428 |
| XAGE1B    | Xp11.22  | -0.07384 | 0.149756 | 0.245431 |
| ARL4A     | 7p21.3   | -0.07383 | 0.149799 | 0.245482 |
| LMX1B     | 9q33.3   | -0.07383 | 0.149826 | 0.245505 |
| GMCL2     | 5q35.3   | -0.07381 | 0.149889 | 0.245588 |
| TRIM9     | 14q22.1  | -0.07379 | 0.15001  | 0.245766 |
| CA1       | 8q21.2   | -0.07378 | 0.150098 | 0.245891 |
| PYROXD1   | 12p12.1  | -0.07377 | 0.150134 | 0.245927 |
| SCYL2     | 12q23.1  | -0.07377 | 0.150145 | 0.245927 |
| GPS2      | 17p13.1  | -0.07373 | 0.150353 | 0.246247 |
| PHPT1     | 9q34.3   | -0.07372 | 0.150408 | 0.246317 |
| DRAP1     | 11q13.1  | -0.07371 | 0.150476 | 0.246409 |
| NEUROD6   | 7p14.3   | -0.0737  | 0.150513 | 0.24645  |
| ECHS1     | 10q26.3  | 0.073662 | 0.150733 | 0.246789 |
| RNPEPL1   | 2q37.3   | 0.073655 | 0.150771 | 0.246829 |
| TBX5      | 12q24.21 | -0.07365 | 0.150782 | 0.246829 |
| SNAR-G2   | 19q13.33 | 0.073639 | 0.15086  | 0.246937 |

|           |                |          |          |          |
|-----------|----------------|----------|----------|----------|
| TRPM7     | 15q21.2        | -0.07363 | 0.150902 | 0.246985 |
| ARNTL2    | 12p11.23       | 0.073617 | 0.150983 | 0.247097 |
| MLX       | 17q21.2        | 0.073615 | 0.150995 | 0.247097 |
| FRG2B     | 10q26.3        | -0.0736  | 0.151051 | 0.247159 |
| EML6      | 2p16.1         | 0.073604 | 0.151057 | 0.247159 |
| ZNF780B   | 19q13.2        | 0.073588 | 0.151146 | 0.247266 |
| NCF2      | 1q25.3         | -0.07359 | 0.151147 | 0.247266 |
| GOLT1A    | 1q32.1         | 0.073578 | 0.151201 | 0.247329 |
| CLIC5     | 6p21.1         | 0.073576 | 0.151211 | 0.247329 |
| KRTAP2-4  | 17q21.2        | 0.073533 | 0.151455 | 0.247708 |
| PLOD1     | 1p36.22        | -0.07352 | 0.151531 | 0.247813 |
| MRPL39    | 21q21.3        | 0.073496 | 0.151658 | 0.247993 |
| CTPS2     | Xp22.2         | -0.07349 | 0.151666 | 0.247993 |
| AHSG      | 3q27.3         | -0.07349 | 0.1517   | 0.248027 |
| CBWD5     | 9q21.11        | 0.073457 | 0.151879 | 0.2483   |
| ARAP2     | 4p14           | -0.07345 | 0.151909 | 0.248325 |
| IFT88     | 13q12.11       | 0.073449 | 0.151919 | 0.248325 |
| CASC8     | 8q24.21        | 0.073442 | 0.151963 | 0.248377 |
| PEF1      | 1p35.2         | -0.07344 | 0.151992 | 0.248379 |
| NEDD8     | 14q12          | -0.07344 | 0.151997 | 0.248379 |
| RRN3P1    | 16p12.2        | 0.073435 | 0.152002 | 0.248379 |
| ZNF12     | 7p22.1         | -0.07342 | 0.152069 | 0.248469 |
| ETFB      | 19q13.41       | 0.073403 | 0.152181 | 0.248632 |
| NOX3      | 6q25.3         | -0.07338 | 0.152295 | 0.248798 |
| ABHD16B   | 20q13.33       | 0.073374 | 0.15234  | 0.248852 |
| SNRPB2    | 20p12.1        | -0.07336 | 0.152392 | 0.248916 |
| PGS1      | 17q25.3        | 0.073359 | 0.152422 | 0.248945 |
| ZSCAN1    | 19q13.43       | -0.07335 | 0.152478 | 0.249016 |
| RLF       | 1p34.2         | 0.073336 | 0.152555 | 0.249121 |
| RASGRP2   | 11q13.1        | -0.0733  | 0.152756 | 0.249428 |
| SPRTN     | 1q42.2         | 0.073276 | 0.152892 | 0.249631 |
| TENT5C    | 1p12           | -0.07326 | 0.15296  | 0.249721 |
| PRKCSH    | 19p13.2        | 0.073258 | 0.152993 | 0.249754 |
| RPS2      | 16p13.3        | 0.073229 | 0.153156 | 0.250001 |
| MKS1      | 17q22          | -0.07321 | 0.153252 | 0.250137 |
| LOC340357 | 8p23.1-p22     | -0.0732  | 0.153293 | 0.250183 |
| SLC39A3   | 19p13.3        | 0.073188 | 0.153386 | 0.250315 |
| DIO1      | 1p32.3         | -0.07318 | 0.153424 | 0.250356 |
| ZNF490    | 19p13.2-p13.13 | -0.07317 | 0.153471 | 0.250413 |
| EIPR1     | 2p25.3         | 0.073169 | 0.153494 | 0.25043  |
| MYO5B     | 18q21.1        | 0.073156 | 0.153568 | 0.250531 |
| IDH3B     | 20p13          | 0.073128 | 0.153725 | 0.250766 |
| FRMD5     | 15q15.3        | 0.073119 | 0.153777 | 0.250813 |
| MYCBP     | 1p34.3         | 0.073118 | 0.15378  | 0.250813 |
| NSF       | 17q21.31       | 0.073116 | 0.153792 | 0.250813 |
| CLHC1     | 2p16.1         | 0.073082 | 0.153985 | 0.251108 |
| SPATA6    | 1p33           | -0.07308 | 0.154014 | 0.251135 |
| DEFA6     | 8p23.1         | -0.07306 | 0.154089 | 0.251236 |
| ARHGAP5   | 14q12          | -0.07304 | 0.154203 | 0.251402 |
| GRIN2C    | 17q25.1        | -0.07303 | 0.154258 | 0.251471 |
| SCAMP5    | 15q24.2        | -0.073   | 0.154427 | 0.251726 |
| APEX2     | Xp11.21        | 0.073001 | 0.154442 | 0.25173  |
| DIO3OS    | 14q32.31       | -0.073   | 0.154473 | 0.251754 |
| SNORA25   | 11q21          | 0.072994 | 0.154482 | 0.251754 |
| ZNF397    | 18q12.2        | 0.072987 | 0.154521 | 0.251797 |
| OR56B4    | 11p15.4        | -0.07298 | 0.154587 | 0.251884 |
| LIPH      | 3q27.2         | 0.072959 | 0.154678 | 0.252013 |
| ZNF451    | 6p12.1         | 0.072951 | 0.154725 | 0.252068 |

|           |                |          |          |          |
|-----------|----------------|----------|----------|----------|
| WDR49     | 3q26.1         | -0.07294 | 0.154805 | 0.252178 |
| CACNA1G   | 17q21.33       | -0.07293 | 0.154824 | 0.252189 |
| GPR18     | 13q32.3        | -0.07291 | 0.15496  | 0.25239  |
| FAM205A   | 9p13.3         | 0.072853 | 0.155282 | 0.252894 |
| SUPT20HL1 | Xp22.11        | -0.07285 | 0.155308 | 0.252916 |
| FCMR      | 1q32.1         | -0.07284 | 0.155341 | 0.252948 |
| ANKMY2    | 7p21.1         | -0.07284 | 0.155364 | 0.252965 |
| ODAPH     | 4q21.1         | -0.07283 | 0.155431 | 0.253055 |
| SPCS1     | 3p21.1         | -0.07281 | 0.155511 | 0.253151 |
| PRR34-AS1 | 22q13.31       | -0.07281 | 0.155516 | 0.253151 |
| ZNF417    | 19q13.43       | 0.072797 | 0.155603 | 0.253253 |
| ANP32A    | 15q23          | 0.072796 | 0.155604 | 0.253253 |
| DNAJC3    | 13q32.1        | -0.07278 | 0.155702 | 0.253392 |
| KLK8      | 19q13.41       | -0.07277 | 0.155742 | 0.253437 |
| COL27A1   | 9q32           | 0.072764 | 0.155787 | 0.253489 |
| GOPC      | 6q22.1         | -0.07276 | 0.155802 | 0.253492 |
| NLRP14    | 11p15.4        | 0.072742 | 0.155914 | 0.253654 |
| POR       | 7q11.23        | -0.07274 | 0.15593  | 0.253661 |
| MYL4      | 17q21.32       | -0.07273 | 0.156    | 0.253753 |
| MAGEA1    | Xq28           | -0.07271 | 0.156104 | 0.253869 |
| IDO2      | 8p11.21        | -0.07271 | 0.156106 | 0.253869 |
| HSFY1P1   | 22q11.1        | 0.072708 | 0.156109 | 0.253869 |
| SCAMP4    | 19p13.3        | 0.072705 | 0.156124 | 0.253873 |
| ZNF654    | 3p11.1         | -0.0727  | 0.156163 | 0.253904 |
| SPRED2    | 2p14           | 0.072697 | 0.156169 | 0.253904 |
| RGS7      | 1q43 1q23.1    | -0.07267 | 0.156314 | 0.254117 |
| ARMC10    | 7q22.1         | -0.07267 | 0.156325 | 0.254117 |
| ALOX12P2  | 17p13.1        | 0.072652 | 0.156429 | 0.254265 |
| VEPH1     | 3q25.31-q25.32 | -0.07265 | 0.156459 | 0.254293 |
| C1ORF189  | 1q21.3         | -0.07263 | 0.156531 | 0.25439  |
| SNORA47   | 5q13.3         | 0.072624 | 0.156589 | 0.254463 |
| OXER1     | 2p21           | -0.07261 | 0.156649 | 0.25454  |
| NUDT14    | 14q32.33       | -0.07261 | 0.156683 | 0.254575 |
| EPO       | 7q22.1         | 0.07257  | 0.156894 | 0.254892 |
| PRPF8     | 17p13.3        | 0.072569 | 0.156904 | 0.254892 |
| SMAD3     | 15q22.33       | -0.07257 | 0.156919 | 0.254896 |
| OAZ3      | 1q21.3         | 0.072563 | 0.156935 | 0.254902 |
| PLEKHF1   | 19q12          | -0.07254 | 0.157068 | 0.255097 |
| SLC37A3   | 7q34           | -0.07254 | 0.157089 | 0.25511  |
| CCDC68    | 18q21.2        | 0.072516 | 0.157209 | 0.255284 |
| SNIP1     | 1p34.3         | -0.07251 | 0.157222 | 0.255285 |
| MRE11     | 11q21          | 0.072508 | 0.157251 | 0.255311 |
| PTCHD3P1  | 10p11.23       | -0.07249 | 0.157352 | 0.255455 |
| RBM11     | 21q11.2        | -0.07249 | 0.157372 | 0.255466 |
| LINC00950 | 9p13.3         | 0.072482 | 0.157404 | 0.255495 |
| TNFRSF10C | 8p21.3         | -0.07248 | 0.157415 | 0.255495 |
| AP3S2     | 15q26.1        | -0.07248 | 0.157432 | 0.255502 |
| TM9SF4    | 20q11.21       | -0.07247 | 0.157457 | 0.255522 |
| ANKRD34C  | 15q25.1        | -0.07246 | 0.157528 | 0.255616 |
| NBPF6     | 1p13.3         | 0.072456 | 0.157549 | 0.25563  |
| GPR108    | 19p13.3        | -0.07244 | 0.15762  | 0.25572  |
| STAG3L2   | 7q11.23        | 0.072442 | 0.15763  | 0.25572  |
| OR6C3     | 12q13.2        | -0.07241 | 0.157798 | 0.255971 |
| TMEM174   | 5q13.2         | 0.07241  | 0.157814 | 0.255977 |
| RHOBTB2   | 8p21.3         | -0.0724  | 0.157874 | 0.256051 |
| TSHR      | 14q31.1        | -0.0724  | 0.157885 | 0.256051 |
| ANKRD28   | 3p25.1         | 0.072377 | 0.158003 | 0.256221 |
| ZNF790    | 19q13.12       | -0.07237 | 0.158068 | 0.256305 |

|           |                 |          |          |          |
|-----------|-----------------|----------|----------|----------|
| PCBD1     | 10q22.1         | 0.072362 | 0.158094 | 0.256326 |
| RLIM      | Xq13.2          | 0.07236  | 0.158106 | 0.256326 |
| FIBP      | 11q13.1         | -0.07234 | 0.158218 | 0.256486 |
| GPRIN2    | 10q11.22        | -0.07232 | 0.158307 | 0.25661  |
| SLCO4C1   | 5q21.1          | -0.07231 | 0.158398 | 0.256715 |
| SRRM2-AS1 | 16p13.3         | 0.072307 | 0.158407 | 0.256715 |
| SNX24     | 5q23.2          | -0.07231 | 0.15841  | 0.256715 |
| ZMYND15   | 17p13.2         | 0.072293 | 0.158492 | 0.256827 |
| GSTT2     | 22q11.23        | -0.07227 | 0.15861  | 0.256998 |
| SERF2     | 15q15.3         | -0.07227 | 0.158629 | 0.257007 |
| P2RX6     | 22q11.21        | -0.07226 | 0.158676 | 0.25705  |
| PABPC1L2A | Xq13.2          | -0.07226 | 0.158681 | 0.25705  |
| OR52H1    | 11p15.4         | 0.07225  | 0.15874  | 0.257124 |
| NT5C1A    | 1p34.2          | -0.07223 | 0.158858 | 0.257294 |
| GABBR2    | 9q22.33         | -0.07219 | 0.15911  | 0.257682 |
| RNASE7    | 14q11.2         | -0.07217 | 0.159172 | 0.257743 |
| RPL37A    | 2q35            | -0.07217 | 0.159173 | 0.257743 |
| REXO1L6P  | 8q21.2          | -0.07215 | 0.159335 | 0.257983 |
| MROH7     | 1p32.3          | 0.072142 | 0.159366 | 0.258013 |
| STX1A     | 7q11.23         | 0.072139 | 0.15938  | 0.258016 |
| BIRC3     | 11q22.2         | -0.07213 | 0.159408 | 0.258039 |
| NLRP11    | 19q13.42-q13.43 | -0.07212 | 0.159499 | 0.258166 |
| CR2       | 1q32.2          | -0.07209 | 0.159638 | 0.25837  |
| COX5A     | 15q24.2         | 0.072092 | 0.159655 | 0.258377 |
| RARS      | 5q34            | 0.072087 | 0.159683 | 0.258401 |
| SBK1      | 16p12.1         | -0.07208 | 0.159703 | 0.258412 |
| EIF6      | 20q11.22        | -0.07207 | 0.159799 | 0.258547 |
| CLPTM1    | 19q13.32        | 0.072033 | 0.159997 | 0.258827 |
| FAM241B   | 10q22.1         | 0.072033 | 0.159998 | 0.258827 |
| CREB3L1   | 11p11.2         | 0.07203  | 0.160013 | 0.258883 |
| MAN2B2    | 4p16.1          | -0.07201 | 0.160152 | 0.259034 |
| LYSMD2    | 15q21.2         | -0.072   | 0.160201 | 0.259092 |
| PRAMEF1   | 1p36.21         | 0.071988 | 0.160257 | 0.259162 |
| DDB1      | 11q12.2         | 0.071947 | 0.160499 | 0.259533 |
| GRAMD4    | 22q13.31        | 0.071933 | 0.160576 | 0.259625 |
| MAP4K1    | 19q13.2         | -0.07193 | 0.160583 | 0.259625 |
| LSM14B    | 20q13.33        | 0.07193  | 0.160595 | 0.259625 |
| NXPH1     | 7p21.3          | -0.07192 | 0.160661 | 0.259712 |
| LINC00469 | 17q25.1         | -0.07191 | 0.160724 | 0.259765 |
| FBN2      | 5q23.3          | -0.07191 | 0.160737 | 0.259765 |
| CAMK1     | 3p25.3          | -0.07191 | 0.160742 | 0.259765 |
| LFNG      | 7p22.3          | -0.0719  | 0.160747 | 0.259765 |
| MZT2A     | 2q21.1          | 0.071887 | 0.160848 | 0.259906 |
| HLA-F     | 6p22.1          | 0.071885 | 0.16086  | 0.259906 |
| NDUFAF2   | 5q12.1          | 0.071874 | 0.160924 | 0.259989 |
| HFE       | 6p22.2          | -0.07186 | 0.161026 | 0.260132 |
| MEX3A     | 1q22            | -0.07185 | 0.161052 | 0.260154 |
| POU5F1B   | 8q24.21         | 0.071815 | 0.16127  | 0.260485 |
| UROC1     | 3q21.3          | 0.071811 | 0.161294 | 0.260502 |
| ISY1      | 3q21.3          | -0.07179 | 0.161421 | 0.260687 |
| SULT1A1   | 16p11.2         | -0.07177 | 0.161517 | 0.260821 |
| FEZF2     | 3p14.2          | 0.071732 | 0.161753 | 0.261175 |
| ST8SIA6   | 10p12.33        | -0.07173 | 0.161762 | 0.261175 |
| MEF2D     | 1q22            | -0.07173 | 0.161787 | 0.261193 |
| HEMK1     | 3p21.31         | 0.071699 | 0.161945 | 0.261425 |
| KRT27     | 17q21.2         | -0.0717  | 0.161957 | 0.261425 |
| SPON1     | 11p15.2         | -0.07167 | 0.162125 | 0.261677 |
| CNBD2     | 20q11.23        | -0.07166 | 0.162153 | 0.261686 |

|              |              |          |          |          |
|--------------|--------------|----------|----------|----------|
| CATSPER4     | 1p36.11      | 0.07166  | 0.162174 | 0.261686 |
| RGMB         | 5q15         | -0.07166 | 0.162178 | 0.261686 |
| TECTB        | 10q25.2      | 0.071659 | 0.162184 | 0.261686 |
| RGS12        | 4p16.3       | 0.07165  | 0.162236 | 0.26175  |
| CT62         | 15q23        | 0.071625 | 0.162383 | 0.261967 |
| SNORA74A     | 5q31.2       | 0.071621 | 0.162408 | 0.261985 |
| RAB43        | 3q21.3       | 0.071611 | 0.162463 | 0.262048 |
| HK3          | 5q35.2       | -0.07161 | 0.162475 | 0.262048 |
| PDE6H        | 12p12.3      | -0.07161 | 0.162486 | 0.262048 |
| PF4V1        | 4q13.3       | 0.071577 | 0.162662 | 0.26231  |
| ZSCAN18      | 19q13.43     | -0.07157 | 0.162706 | 0.262361 |
| RPL28        | 19q13.42     | 0.071561 | 0.162756 | 0.262419 |
| OR2V2        | 5q35.3       | 0.071555 | 0.162791 | 0.262435 |
| ACTG1P4      | 1p21.1       | 0.071555 | 0.162792 | 0.262435 |
| FGD1         | Xp11.22      | -0.07155 | 0.162815 | 0.262452 |
| PTER         | 10p13        | 0.071533 | 0.162923 | 0.262605 |
| PAFAH2       | 1p36.11      | -0.07152 | 0.162998 | 0.262693 |
| GOLGA2P3Y    | Yq11.23      | 0.071518 | 0.16301  | 0.262693 |
| C14ORF93     | 14q11.2      | -0.07152 | 0.163017 | 0.262693 |
| RNF216       | 7p22.1       | -0.07151 | 0.163044 | 0.26271  |
| SPATA24      | 5q31.2       | 0.071511 | 0.163054 | 0.26271  |
| TRIML1       | 4q35.2       | -0.07149 | 0.163148 | 0.26284  |
| GUF1         | 4p12         | 0.071479 | 0.163239 | 0.262966 |
| LYPD6        | 2q23.2       | 0.071476 | 0.16326  | 0.262978 |
| COL4A4       | 2q36.3       | -0.07146 | 0.163356 | 0.263112 |
| BSDC1        | 1p35.1       | -0.07144 | 0.163447 | 0.263236 |
| CCNY         | 10p11.21     | -0.07144 | 0.163459 | 0.263236 |
| PIK3CA       | 3q26.32      | -0.0714  | 0.163737 | 0.263662 |
| COLEC10      | 8q24.12      | -0.07138 | 0.163824 | 0.263781 |
| KRT38        | 17q21.2      | -0.07137 | 0.163899 | 0.26388  |
| FKBP14       | 7p14.3       | -0.07136 | 0.163973 | 0.263978 |
| DNAJC7       | 17q21.2      | 0.07133  | 0.164121 | 0.264156 |
| CEP162       | 6q14.2-q14.3 | 0.07133  | 0.164122 | 0.264156 |
| IRGC         | 19q13.31     | 0.07133  | 0.164123 | 0.264156 |
| OR8B8        | 11q24.2      | 0.071314 | 0.164219 | 0.264288 |
| MPP4         | 2q33.1       | -0.0713  | 0.164285 | 0.264374 |
| OR2T12       | 1q44         | 0.071284 | 0.164395 | 0.264531 |
| OR5C1        | 9q33.2       | 0.071247 | 0.164618 | 0.264867 |
| YBX1         | 1p34.2       | 0.071244 | 0.164634 | 0.264872 |
| TREML2       | 6p21.1       | -0.07122 | 0.164754 | 0.265044 |
| DAGLB        | 7p22.1       | 0.071208 | 0.164847 | 0.265171 |
| GS1-124K5.11 | 7q11.21      | 0.071204 | 0.164871 | 0.265189 |
| NAV2         | 11p15.1      | 0.0712   | 0.164897 | 0.265209 |
| INKA2        | 1p13.2       | -0.07117 | 0.165054 | 0.265441 |
| SCAF11       | 12q12        | 0.071161 | 0.165127 | 0.265537 |
| COX7B        | Xq21.1       | 0.071157 | 0.16515  | 0.265553 |
| PRDM16-DT    | 1p36.32      | -0.07115 | 0.165177 | 0.265574 |
| LINC00909    | 18q22.3      | -0.07113 | 0.165296 | 0.265745 |
| KRTAP9-9     | 17q21.2      | 0.071128 | 0.165326 | 0.265772 |
| ILDR2        | 1q24.1       | -0.07111 | 0.165453 | 0.265955 |
| LINC01558    | 6q27         | -0.07109 | 0.165539 | 0.266065 |
| STRA8        | 7q33         | -0.07109 | 0.165549 | 0.266065 |
| SYCP2        | 20q13.33     | 0.07108  | 0.16561  | 0.266143 |
| C11ORF45     | 11q24.3      | -0.07106 | 0.165703 | 0.266272 |
| KCTD20       | 6p21.31      | -0.07105 | 0.165764 | 0.266326 |
| DOCK8-AS1    | 9p24.3       | -0.07105 | 0.165764 | 0.266326 |
| TMOD2        | 15q21.2      | -0.07105 | 0.165784 | 0.266338 |
| AQP7         | 9p13.3       | -0.07104 | 0.165836 | 0.266399 |

|              |          |          |          |          |
|--------------|----------|----------|----------|----------|
| UBE3C        | 7q36.3   | 0.07103  | 0.165907 | 0.266491 |
| CFAP61       | 20p11.23 | -0.07102 | 0.165996 | 0.266613 |
| SCP2D1       | 20p11.23 | 0.070985 | 0.166176 | 0.266881 |
| ADH6         | 4q23     | -0.07098 | 0.166226 | 0.26694  |
| METTL7B      | 12q13.2  | -0.07095 | 0.166384 | 0.267173 |
| LCE1C        | 1q21.3   | 0.07092  | 0.166569 | 0.267448 |
| ANKRD24      | 19p13.3  | 0.070911 | 0.166623 | 0.267513 |
| PROSER1      | 13q13.3  | 0.070897 | 0.166706 | 0.267624 |
| PLEKHG3      | 14q23.3  | 0.070884 | 0.166783 | 0.267722 |
| C4ORF51      | 4q31.21  | 0.070882 | 0.166793 | 0.267722 |
| C12ORF43     | 12q24.31 | -0.07088 | 0.166818 | 0.26774  |
| HPN          | 19q13.11 | -0.07086 | 0.166914 | 0.267873 |
| ARV1         | 1q42.2   | 0.070855 | 0.16696  | 0.267925 |
| FGD6         | 12q22    | -0.07083 | 0.167106 | 0.268138 |
| FXR2         | 17p13.1  | -0.07083 | 0.167137 | 0.268166 |
| AHR          | 7p21.1   | -0.07082 | 0.16716  | 0.268166 |
| NBPF22P      | 5q14.3   | 0.070816 | 0.167189 | 0.268166 |
| RTL10        | 22q11.21 | 0.070816 | 0.16719  | 0.268166 |
| TFB1M        | 6q25.3   | 0.070816 | 0.16719  | 0.268166 |
| CCDC47       | 17q23.3  | -0.07078 | 0.167431 | 0.268531 |
| FAM102A      | 9q34.11  | -0.07077 | 0.167489 | 0.268603 |
| OTOF         | 2p23.3   | -0.07073 | 0.167726 | 0.268961 |
| ATP5MD       | 10q24.33 | 0.070725 | 0.167739 | 0.268961 |
| RNF43        | 17q22    | -0.07072 | 0.167768 | 0.268985 |
| TMPRSS6      | 22q12.3  | -0.07072 | 0.167785 | 0.268991 |
| DLGAP1-AS1   | 18p11.31 | -0.0707  | 0.167865 | 0.269098 |
| CDR2         | 16p12.2  | 0.070682 | 0.167999 | 0.269277 |
| ZNF596       | 8p23.3   | -0.07068 | 0.168004 | 0.269277 |
| CACNA2D2     | 3p21.31  | -0.07067 | 0.16807  | 0.269343 |
| CC2D2B       | 10q24.1  | -0.07067 | 0.168072 | 0.269343 |
| GBP7         | 1p22.2   | -0.07067 | 0.1681   | 0.269364 |
| PHKG1        | 7p11.2   | 0.070663 | 0.168112 | 0.269364 |
| OGFOD3       | 17q25.3  | -0.07064 | 0.168268 | 0.269592 |
| ALDH2        | 12q24.12 | -0.07063 | 0.168342 | 0.269689 |
| STK19        | 6p21.33  | 0.070622 | 0.168359 | 0.269695 |
| KDM5A        | 12p13.33 | -0.07061 | 0.168421 | 0.269766 |
| OR4D5        | 11q24.1  | -0.07061 | 0.168432 | 0.269766 |
| CRTC3        | 15q26.1  | -0.07061 | 0.168444 | 0.269766 |
| OR2T11       | 1q44     | -0.0706  | 0.168488 | 0.269816 |
| GPR39        | 2q21.2   | -0.0706  | 0.168509 | 0.269828 |
| KCNMB3       | 3q26.32  | 0.07059  | 0.168552 | 0.269874 |
| TMCO5A       | 15q14    | -0.07058 | 0.168616 | 0.269955 |
| BNIP1        | 5q35.1   | 0.07057  | 0.168677 | 0.270031 |
| OR2A2        | 7q35     | 0.070558 | 0.168747 | 0.270107 |
| C19ORF24     | 19p13.3  | 0.070557 | 0.168751 | 0.270107 |
| MTERF2       | 12q23.3  | 0.07055  | 0.168795 | 0.270156 |
| PDHB         | 3p14.3   | -0.07053 | 0.168929 | 0.270349 |
| ZNF830       | 17q12    | -0.07052 | 0.168984 | 0.270415 |
| FGF23        | 12p13.32 | -0.07051 | 0.169037 | 0.270478 |
| LOC100129935 | 19q13.2  | -0.07051 | 0.169052 | 0.270481 |
| FAM153B      | 5q35.2   | -0.0705  | 0.169069 | 0.270487 |
| TMEM74B      | 20p13    | 0.07048  | 0.169223 | 0.270711 |
| STX17        | 9q31.1   | 0.070477 | 0.169241 | 0.270717 |
| CSRNP1       | 3p22.2   | -0.07046 | 0.169343 | 0.27086  |
| SPINK14      | 5q32     | 0.07045  | 0.169401 | 0.270931 |
| BCDIN3D      | 12q13.12 | -0.07043 | 0.169534 | 0.271122 |
| CDC14C       | 7p12.3   | -0.07042 | 0.169604 | 0.271213 |
| CPPED1       | 16p13.12 | -0.07041 | 0.169633 | 0.271237 |

|           |                 |          |          |          |
|-----------|-----------------|----------|----------|----------|
| ZNF510    | 9q22.33         | -0.07041 | 0.16967  | 0.271274 |
| ACOT4     | 14q24.3         | -0.0704  | 0.169703 | 0.271306 |
| OR10Z1    | 1q23.1          | -0.07038 | 0.169798 | 0.271392 |
| DEFB118   | 20q11.21        | 0.070385 | 0.169798 | 0.271392 |
| IFNA14    | 9p21.3          | 0.070385 | 0.169798 | 0.271392 |
| BASP1-AS1 | 5p15.1          | -0.07038 | 0.169832 | 0.271424 |
| HAUS4     | 14q11.2         | 0.070375 | 0.169855 | 0.27144  |
| NFX1      | 9p13.3          | 0.070373 | 0.169873 | 0.271446 |
| CCDC63    | 12q24.11        | -0.07037 | 0.169886 | 0.271446 |
| PPP1R1B   | 17q12           | 0.070362 | 0.16994  | 0.27151  |
| SKOR1     | 15q23           | 0.070355 | 0.16998  | 0.271553 |
| CEP41     | 7q32.2          | -0.07035 | 0.169998 | 0.271561 |
| SORD      | 15q21.1         | 0.070343 | 0.170053 | 0.271608 |
| LIPM      | 10q23.31        | -0.07034 | 0.170055 | 0.271608 |
| FGF19     | 11q13.3         | -0.07034 | 0.170087 | 0.27162  |
| SLC35D1   | 1p31.3          | -0.07034 | 0.17009  | 0.27162  |
| PARM1     | 4q13.3          | -0.07033 | 0.170103 | 0.27162  |
| SCARNA2   | 1p13.3          | -0.07033 | 0.170119 | 0.271623 |
| DNLZ      | 9q34.3          | 0.070329 | 0.170137 | 0.271628 |
| RBFOX1    | 16p13.3         | -0.07033 | 0.170161 | 0.271628 |
| FAM3B     | 21q22.3         | -0.07032 | 0.170162 | 0.271628 |
| USP38     | 4q31.21         | -0.07031 | 0.170264 | 0.271769 |
| PPARD     | 6p21.31         | 0.070305 | 0.170282 | 0.271775 |
| DUXA      | 19q13.43        | -0.0703  | 0.170327 | 0.271816 |
| OR11L1    | 1q44            | 0.070295 | 0.170346 | 0.271816 |
| EVX2      | 2q31.1          | -0.07029 | 0.170348 | 0.271816 |
| PARD3     | 10p11.22-p11.21 | 0.07029  | 0.170375 | 0.271837 |
| ABHD3     | 18q11.2         | 0.070276 | 0.17046  | 0.271951 |
| RAB5B     | 12q13.2         | -0.07027 | 0.170494 | 0.271984 |
| CYP46A1   | 14q32.2         | -0.07022 | 0.170816 | 0.272475 |
| SEC11A    | 15q25.2-q25.3   | -0.07021 | 0.170877 | 0.272551 |
| LONRF1    | 8p23.1          | -0.07018 | 0.171052 | 0.272808 |
| LINC00965 | 8p23.1          | -0.07017 | 0.171108 | 0.272876 |
| DCAF16    | 4p15.31         | 0.070141 | 0.171287 | 0.273139 |
| OR14A16   | 1q44            | -0.07014 | 0.171319 | 0.273169 |
| MRGPRX2   | 11p15.1         | -0.07009 | 0.17159  | 0.273579 |
| AK3       | 9p24.1          | -0.07007 | 0.171725 | 0.273773 |
| OR2G6     | 1q44            | 0.070064 | 0.171757 | 0.273802 |
| OR4C6     | 11q11           | -0.07006 | 0.171775 | 0.273809 |
| UPF3A     | 13q34           | 0.070056 | 0.171806 | 0.273827 |
| CEP63     | 3q22.2          | -0.07005 | 0.171813 | 0.273827 |
| OSBP      | 11q12.1         | 0.070038 | 0.171919 | 0.273973 |
| GSTO2     | 10q25.1         | 0.070034 | 0.171939 | 0.273982 |
| ZNF680    | 7q11.21         | -0.07003 | 0.171952 | 0.273982 |
| MAD2L1BP  | 6p21.1          | 0.070023 | 0.17201  | 0.274053 |
| MYO18B    | 22q12.1         | -0.06999 | 0.172217 | 0.274361 |
| MT1IP     | 16q13           | 0.069984 | 0.172251 | 0.274373 |
| DMWD      | 19q13.32        | 0.069983 | 0.172252 | 0.274373 |
| TMEM94    | 17q25.1         | 0.06997  | 0.172332 | 0.274478 |
|           | 10-Mar 17q23.2  | -0.06997 | 0.172359 | 0.274499 |
| SUCLA2    | 13q14.2         | -0.06996 | 0.172414 | 0.274565 |
| COX6B1    | 19q13.12        | 0.069947 | 0.172475 | 0.274625 |
| OBP2A     | 9q34.3          | -0.06995 | 0.172479 | 0.274625 |
| EWSAT1    | 15q23           | -0.06994 | 0.172508 | 0.274648 |
| HCP5      | 6p21.33         | 0.06994  | 0.172521 | 0.274648 |
| TINCR     | 19p13.3         | -0.06993 | 0.172566 | 0.274698 |
| CCDC62    | 12q24.31        | -0.06993 | 0.172588 | 0.274711 |
| OR4C12    | 11p11.12        | 0.069923 | 0.172621 | 0.274742 |



|           |          |          |          |          |
|-----------|----------|----------|----------|----------|
| COPG1     | 3q21.3   | 0.069913 | 0.172687 | 0.274809 |
| LAMP3     | 3q27.1   | -0.06991 | 0.172691 | 0.274809 |
| CHCHD5    | 2q14.1   | -0.0699  | 0.172757 | 0.274884 |
| FAM124A   | 13q14.3  | -0.0699  | 0.172765 | 0.274884 |
| MED14     | Xp11.4   | 0.069884 | 0.172866 | 0.275022 |
| ZDHHC7    | 16q24.1  | 0.069864 | 0.172989 | 0.275181 |
| RPUSD3    | 3p25.3   | 0.069863 | 0.172993 | 0.275181 |
| TMEM177   | 2q14.2   | 0.069857 | 0.17303  | 0.275192 |
| CPTP      | 1p36.33  | 0.069856 | 0.173038 | 0.275192 |
| TNFSF13   | 17p13.1  | -0.06986 | 0.173041 | 0.275192 |
| FKBP5     | 6p21.31  | 0.069838 | 0.173144 | 0.275334 |
| CPNE2     | 16q13    | -0.06983 | 0.173201 | 0.275374 |
| IL4       | 5q31.1   | 0.069828 | 0.173207 | 0.275374 |
| ZNF785    | 16p11.2  | 0.069828 | 0.173211 | 0.275374 |
| ZBTB8B    | 1p35.1   | -0.06981 | 0.173331 | 0.275544 |
| KLK14     | 19q13.41 | 0.069792 | 0.173431 | 0.27568  |
| CFHR4     | 1q31.3   | -0.06979 | 0.173464 | 0.275683 |
| DBX1      | 11p15.1  | -0.06979 | 0.173471 | 0.275683 |
| MAPK8     | 10q11.22 | -0.06979 | 0.173474 | 0.275683 |
| TFAM      | 10q21.1  | 0.069771 | 0.173558 | 0.275795 |
| RHNO1     | 12p13.33 | 0.069768 | 0.173578 | 0.275805 |
| SLC17A4   | 6p22.2   | 0.069741 | 0.173749 | 0.276055 |
| MYEOV     | 11q13.3  | 0.069737 | 0.173771 | 0.276067 |
| CNTN5     | 11q22.1  | -0.06972 | 0.173871 | 0.276204 |
| CEP57L1   | 6q21     | 0.069692 | 0.174048 | 0.276465 |
| HOXC10    | 12q13.13 | -0.06969 | 0.174072 | 0.276481 |
| FRMD1     | 6q27     | -0.06968 | 0.174112 | 0.276522 |
| MIR205HG  | 1q32.2   | -0.06968 | 0.174139 | 0.276535 |
| AMBRA1    | 11p11.2  | -0.06968 | 0.174148 | 0.276535 |
| NKX2-5    | 5q35.1   | -0.06965 | 0.174293 | 0.276744 |
| CCL4L1    | 17q12    | -0.06964 | 0.174353 | 0.276817 |
| LINC01366 | 5q35.1   | -0.06963 | 0.174421 | 0.276902 |
| LRRC3     | 21q22.3  | -0.06962 | 0.174492 | 0.276994 |
| RAPSN     | 11p11.2  | -0.0696  | 0.174624 | 0.277181 |
| APOL2     | 22q12.3  | -0.06956 | 0.17486  | 0.277533 |
| LINC02085 | 3q12.3   | -0.06955 | 0.174908 | 0.27758  |
| F9        | Xq27.1   | -0.06955 | 0.174917 | 0.27758  |
| FUT2      | 19q13.33 | 0.069548 | 0.174944 | 0.277601 |
| UMOD      | 16p12.3  | 0.069544 | 0.174968 | 0.277617 |
| ACTL6B    | 7q22.1   | -0.06952 | 0.175118 | 0.277832 |
| SPANXN2   | Xq27.3   | -0.06949 | 0.175317 | 0.278127 |
| SLC47A2   | 17p11.2  | 0.069484 | 0.175343 | 0.278146 |
| TBX21     | 17q21.32 | -0.06947 | 0.175405 | 0.278223 |
| IAPP      | 12p12.1  | -0.06945 | 0.175552 | 0.278433 |
| COX16     | 14q24.2  | -0.06945 | 0.175574 | 0.278446 |
| TXNRD2    | 22q11.21 | 0.069438 | 0.175629 | 0.278496 |
| MYO1G     | 7p13     | -0.06944 | 0.175633 | 0.278496 |
| DCK       | 4q13.3   | -0.0694  | 0.175864 | 0.278824 |
| ABCC11    | 16q12.1  | 0.0694   | 0.175868 | 0.278824 |
| AQP10     | 1q21.3   | 0.069386 | 0.175954 | 0.278929 |
| GPAM      | 10q25.2  | -0.06938 | 0.175962 | 0.278929 |
| SEPSECS   | 4p15.2   | -0.06938 | 0.176001 | 0.278969 |
| FOXP1     | 3p13     | 0.069373 | 0.176032 | 0.278996 |
| GON7      | 14q32.12 | -0.06936 | 0.176122 | 0.279082 |
| SKIDA1    | 10p12.31 | -0.06936 | 0.176123 | 0.279082 |
| TRPV5     | 7q34     | 0.069355 | 0.176143 | 0.279082 |
| KLHL25    | 15q25.3  | 0.069353 | 0.176156 | 0.279082 |
| DYDC1     | 10q23.1  | 0.069353 | 0.176156 | 0.279082 |

|           |                    |          |          |          |
|-----------|--------------------|----------|----------|----------|
| CRLF2     | Xp22.33 and Yp11.2 | -0.06934 | 0.176213 | 0.27915  |
| ADSS      | 1q44               | 0.06933  | 0.176301 | 0.279268 |
| ARGFX     | 3q13.33            | 0.069323 | 0.176348 | 0.27932  |
| DUS4L     | 7q22.3             | -0.06931 | 0.17644  | 0.279443 |
| ARMC7     | 17q25.1            | -0.06929 | 0.176533 | 0.279568 |
| ETF1      | 5q31.2             | 0.069286 | 0.176574 | 0.279612 |
| PMS2P4    | 7q11.21            | -0.06926 | 0.176716 | 0.279814 |
| NPAS1     | 19q13.32           | -0.06925 | 0.176772 | 0.27988  |
| CLTCL1    | 22q11.21           | -0.06922 | 0.176974 | 0.280178 |
| ZNF180    | 19q13.31           | 0.069198 | 0.177128 | 0.2804   |
| PLK2      | 5q11.2             | -0.06918 | 0.177263 | 0.280591 |
| LRRC8A    | 9q34.11            | 0.069169 | 0.17731  | 0.280644 |
| RPL23A    | 17q11.2            | -0.06917 | 0.177325 | 0.280645 |
| ODF3      | 11p15.5            | 0.069164 | 0.177339 | 0.280646 |
| PPP6R2    | 22q13.33           | 0.069119 | 0.177627 | 0.281051 |
| SSTR1     | 14q21.1            | 0.069117 | 0.177636 | 0.281051 |
| ALOXE3    | 17p13.1            | 0.069113 | 0.17766  | 0.281051 |
| SLC38A5   | Xp11.23            | 0.069113 | 0.177666 | 0.281051 |
| ESYT2     | 7q36.3             | -0.06911 | 0.17767  | 0.281051 |
| ZNF75D    | Xq26.3             | 0.06911  | 0.177679 | 0.281051 |
| MAPK7     | 17p11.2            | -0.0691  | 0.177756 | 0.281151 |
| ZNF750    | 17q25.3            | -0.06909 | 0.17782  | 0.281229 |
| TMEM198   | 2q35               | -0.06905 | 0.178038 | 0.281525 |
| ELP3      | 8p21.1             | -0.06905 | 0.178064 | 0.281525 |
| HCN4      | 15q24.1            | -0.06905 | 0.178065 | 0.281525 |
| NEUROD1   | 2q31.3             | -0.06905 | 0.178069 | 0.281525 |
| KRTAP4-1  | 17q21.2            | -0.06905 | 0.178082 | 0.281525 |
| SPINK13   | 5q32               | -0.06904 | 0.178092 | 0.281525 |
| ANKFN1    | 17q22              | -0.06904 | 0.178136 | 0.281573 |
| MYH7      | 14q11.2            | 0.069034 | 0.178162 | 0.281591 |
| CYP2C19   | 10q23.33           | 0.069024 | 0.178224 | 0.281668 |
| CAPN14    | 2p23.1             | -0.06902 | 0.178261 | 0.281704 |
| TMBIM6    | 12q13.12           | -0.06901 | 0.178292 | 0.281731 |
| HIST1H2BK | 6p22.1             | 0.069003 | 0.178354 | 0.281807 |
| LCE2D     | 1q21.3             | 0.068991 | 0.178431 | 0.281905 |
| INSL5     | 1p31.3             | -0.06899 | 0.178459 | 0.281928 |
| CHD4      | 12p13.31           | 0.068948 | 0.1787   | 0.282286 |
| TMEM134   | 11q13.2            | -0.06893 | 0.178788 | 0.282389 |
| H2AFY     | 5q31.1             | 0.068934 | 0.178793 | 0.282389 |
| ACP7      | 19q13.2            | -0.06893 | 0.178832 | 0.282411 |
| RAB4A     | 1q42.13            | 0.068927 | 0.178836 | 0.282411 |
| PSMC6     | 14q22.1            | -0.06892 | 0.178853 | 0.282417 |
| OR52N4    | 11p15.4            | -0.06892 | 0.178907 | 0.282479 |
| SOWAHC    | 2q13               | 0.068894 | 0.179041 | 0.282669 |
| CLDN4     | 7q11.23            | -0.06884 | 0.179386 | 0.283191 |
| MRPL23    | 11p15.5            | 0.068809 | 0.179581 | 0.283448 |
| RNF115    | 1q21.1             | 0.068808 | 0.179586 | 0.283448 |
| HTR1F     | 3p11.2-p11.1       | -0.06881 | 0.179591 | 0.283448 |
| RPL32     | 3p25.2             | -0.0688  | 0.17966  | 0.283512 |
| KCNE1     | 21q22.12           | -0.06879 | 0.179683 | 0.283512 |
| TCL1B     | 14q32.13           | -0.06879 | 0.179687 | 0.283512 |
| C17ORF78  | 17q12              | -0.06879 | 0.179688 | 0.283512 |
| LEFTY1    | 1q42.12            | -0.06878 | 0.179745 | 0.283578 |
| FBXL13    | 7q22.1             | -0.06877 | 0.179856 | 0.283728 |
| TBR1      | 2q24.2             | 0.068764 | 0.179867 | 0.283728 |
| LURAP1L   | 9p23               | -0.06876 | 0.179893 | 0.283746 |
| PRR19     | 19q13.2            | 0.06875  | 0.179956 | 0.283823 |
| CCDC134   | 22q13.2            | 0.06874  | 0.180018 | 0.283898 |

|                         |               |          |          |          |
|-------------------------|---------------|----------|----------|----------|
| SRY                     | Yp11.2        | -0.06873 | 0.180066 | 0.283913 |
| LINC00887               | 3q29          | 0.068732 | 0.180069 | 0.283913 |
| PRADC1                  | 2p13.2        | 0.068732 | 0.18007  | 0.283913 |
| ARL5C                   | 17q12         | -0.06873 | 0.180111 | 0.283955 |
| AK7                     | 14q32.2       | 0.068705 | 0.180242 | 0.28414  |
| PRPS1L1                 | 7p21.1        | -0.06868 | 0.180406 | 0.284376 |
| ZNF382                  | 19q13.12      | -0.06866 | 0.180537 | 0.28456  |
| NELFE                   | 6p21.33       | 0.068656 | 0.180552 | 0.28456  |
| SH2B3                   | 12q24.12      | -0.06865 | 0.180619 | 0.284644 |
| PACRG-AS1               | 6q26          | -0.06864 | 0.180662 | 0.284689 |
| TBC1D21                 | 15q24.1       | 0.068621 | 0.180777 | 0.28483  |
| CT83                    | Xq23          | -0.06862 | 0.18078  | 0.28483  |
| PSMB9                   | 6p21.32       | 0.068617 | 0.180804 | 0.284846 |
| DUSP5                   | 10q25.2       | -0.0686  | 0.180886 | 0.284953 |
| ERBB3                   | 12q13.2       | 0.068584 | 0.181012 | 0.285129 |
| MEP1B                   | 18q12.1       | 0.068572 | 0.181092 | 0.285232 |
| SNORA24                 | 4q26          | 0.068562 | 0.181155 | 0.28531  |
| NHP2                    | 5q35.3        | 0.068555 | 0.181195 | 0.28535  |
| DOC2B                   | 17p13.3       | -0.06854 | 0.181279 | 0.285458 |
| SYN1                    | Xp11.3-p11.23 | -0.06854 | 0.181292 | 0.285458 |
| FAM90A1                 | 12p13.31      | -0.06853 | 0.181365 | 0.28549  |
| ZNF746                  | 7q36.1        | 0.068511 | 0.181477 | 0.28569  |
| CCDC34                  | 11p14.1       | 0.06851  | 0.181482 | 0.28569  |
| MICA                    | 6p21.33       | 0.068495 | 0.181581 | 0.285823 |
| FCRL5                   | 1q23.1        | -0.06849 | 0.181635 | 0.285885 |
| MRPL52                  | 14q11.2       | 0.068482 | 0.181665 | 0.28591  |
| KANSL1                  | 17q21.31      | -0.06848 | 0.181689 | 0.285925 |
| DPY19L2P1               | 7p14.2        | -0.06845 | 0.181875 | 0.286196 |
| SP8                     | 7p21.1        | 0.068446 | 0.181891 | 0.286199 |
| KDELRL1                 | 19q13.33      | 0.068411 | 0.182117 | 0.286531 |
| SLC12A3                 | 16q13         | -0.06841 | 0.182131 | 0.286531 |
| CDK5RAP1                | 20q11.21      | 0.068404 | 0.182163 | 0.286559 |
| UGT2B7                  | 4q13.2        | -0.0684  | 0.182187 | 0.286561 |
| ZNF98                   | 19p12         | -0.0684  | 0.182193 | 0.286561 |
| PAK5                    | 20p12.2       | -0.06839 | 0.182243 | 0.286617 |
| LOC100128076            | 9q22.31       | 0.068378 | 0.182328 | 0.286728 |
| FANCF                   | 11p14.3       | -0.06834 | 0.182592 | 0.28712  |
| FAM41AY1                | Yq11.222      | 0.06833  | 0.182639 | 0.287172 |
| TRMT5                   | 14q23.1       | -0.06832 | 0.182733 | 0.287297 |
| SPP2                    | 2q37.1        | -0.06829 | 0.182887 | 0.287516 |
| NPAP1                   | 15q11.2       | -0.06829 | 0.182908 | 0.287527 |
| NOVA2                   | 19q13.32      | -0.06828 | 0.182979 | 0.287596 |
| PMEL                    | 12q13.2       | -0.06828 | 0.18298  | 0.287596 |
| TNF                     | 6p21.33       | -0.06827 | 0.183024 | 0.287643 |
| KANK1                   | 9p24.3        | -0.06827 | 0.183049 | 0.287659 |
| MEPE                    | 4q22.1        | -0.06826 | 0.183063 | 0.287659 |
| TTPA                    | 8q12.3        | -0.06824 | 0.183195 | 0.287843 |
| ZNF793                  | 19q13.12      | -0.06823 | 0.183271 | 0.28794  |
| MTMR10                  | 15q13.3       | -0.06822 | 0.183317 | 0.287989 |
| MRGPRD                  | 11q13.3       | -0.06822 | 0.183357 | 0.288029 |
| SUGT1P4-STRA6LP-CCDC180 | 9q22.33       | -0.06821 | 0.183414 | 0.288096 |
| HIST1H4F                | 6p22.2        | 0.068205 | 0.18344  | 0.288115 |
| CFAP54                  | 12q23.1       | -0.06819 | 0.183548 | 0.288262 |
| SLC30A5                 | 5q13.1-q13.2  | -0.06816 | 0.183723 | 0.288514 |
| ZFP69B                  | 1p34.2        | -0.06815 | 0.183771 | 0.288542 |
| MBD4                    | 3q21.3        | 0.068153 | 0.183776 | 0.288542 |
| APIP                    | 11p13         | -0.06815 | 0.183784 | 0.288542 |
| IFT81                   | 12q24.11      | 0.068143 | 0.183842 | 0.288611 |

|            |               |          |          |          |
|------------|---------------|----------|----------|----------|
| C7ORF57    | 7p12.3        | -0.06813 | 0.183925 | 0.288719 |
| MICAL3     | 22q11.21      | 0.068124 | 0.183964 | 0.288735 |
| PSMD5      | 9q33.2        | 0.068124 | 0.183964 | 0.288735 |
| TCP11      | 6p21.31       | -0.06811 | 0.184072 | 0.28888  |
| SARS       | 1p13.3        | -0.06809 | 0.184187 | 0.289039 |
| RNF113B    | 13q32.2       | 0.068079 | 0.184255 | 0.289123 |
| MX2        | 21q22.3       | -0.06807 | 0.184293 | 0.289159 |
| FOXN4      | 12q24.11      | 0.068053 | 0.18442  | 0.289315 |
| HPS6       | 10q24.32      | 0.068053 | 0.184421 | 0.289315 |
| PLEKHH2    | 2p21          | -0.06804 | 0.184501 | 0.289419 |
| CSPG5      | 3p21.31       | 0.068024 | 0.184611 | 0.289568 |
| LRRC52     | 1q24.1        | 0.06801  | 0.1847   | 0.289685 |
| KMT2C      | 7q36.1        | 0.068004 | 0.184737 | 0.28972  |
| SLC5A6     | 2p23.3        | -0.06799 | 0.184826 | 0.289837 |
| ZIM2       | 19q13.43      | -0.06799 | 0.184846 | 0.289846 |
| PVT1       | 8q24.21       | 0.06797  | 0.18496  | 0.289983 |
| TNIK       | 3q26.2-q26.31 | 0.067969 | 0.184962 | 0.289983 |
| CAMK2G     | 10q22.2       | 0.067965 | 0.184989 | 0.290002 |
| HOXC9      | 12q13.13      | -0.06796 | 0.185029 | 0.290042 |
| MATN1      | 1p35.2        | -0.06795 | 0.185086 | 0.290109 |
| ELANE      | 19p13.3       | -0.06795 | 0.185111 | 0.290125 |
| MTERF4     | 2q37.3        | -0.06794 | 0.185163 | 0.290175 |
| S100P      | 4p16.1        | 0.067937 | 0.185172 | 0.290175 |
| BMP2K      | 4q21.21       | -0.06793 | 0.185191 | 0.290183 |
| SLC5A9     | 1p33          | -0.06793 | 0.185229 | 0.290219 |
| USE1       | 19p13.11      | -0.06792 | 0.185271 | 0.290262 |
| IER3IP1    | 18q21.1       | -0.06789 | 0.185458 | 0.290533 |
| RIPPLY1    | Xq22.3        | 0.067885 | 0.18551  | 0.290581 |
| LINC00303  | 1q32.1        | -0.06788 | 0.185518 | 0.290581 |
| CCDC191    | 3q13.31       | 0.067853 | 0.185715 | 0.290857 |
| RAG2       | 11p12         | 0.067852 | 0.185723 | 0.290857 |
| ST3GAL1    | 8q24.22       | -0.06782 | 0.185934 | 0.29115  |
| HIST4H4    | 12p12.3       | 0.067819 | 0.185939 | 0.29115  |
| GPR182     | 12q13.3       | -0.06782 | 0.185961 | 0.291162 |
| CES3       | 16q22.1       | 0.067791 | 0.186123 | 0.291377 |
| DNAH14     | 1q42.12       | 0.06779  | 0.186128 | 0.291377 |
| CXCL6      | 4q13.3        | -0.06779 | 0.186156 | 0.291398 |
| SLC4A10    | 2q24.2        | -0.06776 | 0.186311 | 0.291617 |
| SLC26A4    | 7q22.3        | -0.06774 | 0.186437 | 0.291792 |
| CSAG2      | Xq28          | -0.06773 | 0.186549 | 0.291944 |
| TAS2R10    | 12p13.2       | 0.067715 | 0.186616 | 0.292026 |
| GABRR2     | 6q15          | 0.067712 | 0.186634 | 0.292033 |
| RPE65      | 1p31.3        | -0.06771 | 0.186656 | 0.292044 |
| GOLM1      | 9q21.33       | 0.067705 | 0.186678 | 0.292055 |
| SPTLC1     | 9q22.31       | -0.0677  | 0.186727 | 0.29211  |
| LCN8       | 9q34.3        | 0.067678 | 0.186856 | 0.292281 |
| BTC        | 4q13.3        | -0.06767 | 0.186878 | 0.292281 |
| PARL       | 3q27.1        | -0.06767 | 0.18688  | 0.292281 |
| CPA5       | 7q32.2        | -0.06767 | 0.186899 | 0.292288 |
| PEX26      | 22q11.21      | 0.067667 | 0.18693  | 0.292312 |
| STXBP5     | 6q24.3        | -0.06766 | 0.186948 | 0.292318 |
| CCL20      | 2q36.3        | -0.06766 | 0.186991 | 0.292363 |
| GADD45GIP1 | 19p13.13      | 0.067646 | 0.187069 | 0.292438 |
| FCGBP      | 19q13.2       | 0.067646 | 0.187069 | 0.292438 |
| ERBIN      | 5q12.3        | -0.06764 | 0.187118 | 0.292492 |
| SNHG32     | 6p21.33       | -0.06762 | 0.187214 | 0.292619 |
| SLC25A20   | 3p21.31       | -0.06761 | 0.187302 | 0.292735 |
| OBP2B      | 9q34.2        | -0.0676  | 0.187354 | 0.292792 |

|              |          |          |          |          |
|--------------|----------|----------|----------|----------|
| LINC00301    | 11q12.2  | 0.067597 | 0.187385 | 0.292795 |
| POTEA        | 8p11.1   | -0.0676  | 0.187385 | 0.292795 |
| YTHDC2       | 5q22.2   | 0.067593 | 0.187414 | 0.292817 |
| PPDPF        | 20q13.33 | 0.06757  | 0.187566 | 0.293032 |
| FAM226B      | Xq13.1   | -0.06757 | 0.187587 | 0.293042 |
| IVD          | 15q15.1  | 0.06756  | 0.18763  | 0.293088 |
| HHLA1        | 8q24.22  | 0.067549 | 0.187703 | 0.293178 |
| PRRG4        | 11p13    | 0.067545 | 0.187726 | 0.293192 |
| TPTE         | 21p11.2  | 0.067533 | 0.187807 | 0.293294 |
| NEUROG2      | 4q25     | -0.06753 | 0.18783  | 0.293308 |
| MCF2         | Xq27.1   | -0.06751 | 0.187929 | 0.293439 |
| ZBTB26       | 9q33.2   | 0.067511 | 0.187951 | 0.293451 |
| IL31RA       | 5q11.2   | -0.06751 | 0.187982 | 0.293476 |
| SRD5A1       | 5p15.31  | 0.067496 | 0.188048 | 0.293557 |
| ATP7A        | Xq21.1   | -0.06747 | 0.188236 | 0.293827 |
| XXYL1        | 3q29     | 0.067426 | 0.188504 | 0.294223 |
| ZP1          | 11q12.2  | -0.06741 | 0.188614 | 0.294372 |
| HRK          | 12q24.22 | 0.067396 | 0.188706 | 0.29448  |
| CD6          | 11q12.2  | -0.06739 | 0.188717 | 0.29448  |
| TRIM6-TRIM34 | 11p15.4  | 0.067392 | 0.188728 | 0.29448  |
| BMP5         | 6p12.1   | -0.06738 | 0.188789 | 0.294549 |
| MED13L       | 12q24.21 | -0.06738 | 0.188802 | 0.294549 |
| RTBDN        | 19p13.13 | 0.067372 | 0.188861 | 0.294612 |
| GNA15        | 19p13.3  | -0.06737 | 0.188871 | 0.294612 |
| IFT22        | 7q22.1   | -0.06737 | 0.188902 | 0.294637 |
| NR2C2        | 3p25.1   | 0.067335 | 0.189106 | 0.294933 |
| YWHAG        | 7q11.23  | -0.06732 | 0.189187 | 0.295036 |
| DBP          | 19q13.33 | 0.067301 | 0.189329 | 0.295234 |
| TBPL2        | 14q22.3  | -0.06729 | 0.189371 | 0.295276 |
| GJA10        | 6q15     | 0.067285 | 0.189438 | 0.295358 |
| ZNF704       | 8q21.13  | -0.06727 | 0.18951  | 0.295448 |
| SNW1         | 14q24.3  | -0.06726 | 0.189576 | 0.295527 |
| FAM167A      | 8p23.1   | -0.06726 | 0.189616 | 0.295566 |
| TSPAN19      | 12q21.31 | -0.06726 | 0.189633 | 0.29557  |
| MS4A3        | 11q12.1  | -0.06725 | 0.189688 | 0.295632 |
| RFC1         | 4p14     | 0.067239 | 0.189741 | 0.295684 |
| OR11H12      | 14q11.2  | -0.06724 | 0.18975  | 0.295684 |
| EBPL         | 13q14.2  | 0.067222 | 0.189853 | 0.295821 |
| PCDHGC5      | 5q31.3   | -0.0672  | 0.189973 | 0.295973 |
| SAA3P        | 11p15.1  | -0.0672  | 0.18999  | 0.295973 |
| MIPEP        | 13q12.12 | 0.0672   | 0.189995 | 0.295973 |
| TNFRSF12A    | 16p13.3  | -0.06719 | 0.190041 | 0.296021 |
| CTNNA1       | 5q31.2   | -0.06718 | 0.190129 | 0.296135 |
| WWC3         | Xp22.2   | -0.06718 | 0.190147 | 0.296141 |
| ZNF717       | 3p12.3   | 0.06715  | 0.19033  | 0.296402 |
| TCTN1        | 12q24.11 | -0.06714 | 0.190365 | 0.296434 |
| SGSM2        | 17p13.3  | 0.067142 | 0.190379 | 0.296434 |
| NWD1         | 19p13.11 | -0.06713 | 0.190449 | 0.296519 |
| DYRK2        | 12q15    | -0.06709 | 0.190754 | 0.296971 |
| NMRAL1       | 16p13.3  | 0.06707  | 0.19086  | 0.297112 |
| PIAS3        | 1q21.1   | 0.067045 | 0.191024 | 0.297345 |
| TMEM165      | 4q12     | -0.06704 | 0.191084 | 0.297415 |
| SPATA31A1    | 9p12     | -0.06702 | 0.191171 | 0.297495 |
| PLA2G3       | 22q12.2  | 0.067022 | 0.191174 | 0.297495 |
| RAP1GAP2     | 17p13.3  | 0.067021 | 0.19118  | 0.297495 |
| ZNF718       | 4p16.3   | 0.066984 | 0.191426 | 0.297854 |
| WDR1         | 4p16.1   | -0.06697 | 0.191517 | 0.297974 |
| RGPD3        | 2q12.2   | 0.066959 | 0.191592 | 0.298066 |

|             |                  |          |          |          |
|-------------|------------------|----------|----------|----------|
| SLC49A4     | 3q21.1           | -0.06695 | 0.191633 | 0.298108 |
| STARD10     | 11q13.4          | -0.06694 | 0.191688 | 0.298169 |
| WVOX        | 16q23.1-q23.2    | -0.06693 | 0.191779 | 0.298288 |
| CSNK2A2     | 16q21            | -0.06692 | 0.191835 | 0.298331 |
| SNF8        | 17q21.32         | -0.06692 | 0.191836 | 0.298331 |
| LGALS8      | 1q43             | 0.066905 | 0.191955 | 0.298493 |
| KRT31       | 17q21.2          | -0.0669  | 0.191999 | 0.298538 |
| STAR        | 8p11.23          | -0.06688 | 0.192095 | 0.298664 |
| AACSP1      | 5q35.3           | 0.066879 | 0.192128 | 0.298693 |
| SBSN        | 19q13.12         | -0.06687 | 0.192201 | 0.29876  |
| RPS4X       | Xq13.1           | -0.06687 | 0.192202 | 0.29876  |
| SLC35E2B    | 1p36.33          | 0.066819 | 0.192528 | 0.299244 |
| SPATA8      | 15q26.2          | -0.06681 | 0.192603 | 0.299337 |
| LRIF1       | 1p13.3           | -0.0668  | 0.192647 | 0.299383 |
| AMN         | 14q32.32         | 0.066789 | 0.192725 | 0.299472 |
| SLC46A1     | 17q11.2          | -0.06679 | 0.192735 | 0.299472 |
| GUCY1B2     | 13q14.3          | 0.066779 | 0.192793 | 0.29954  |
| NDUFA4      | 7p21.3           | -0.06677 | 0.192884 | 0.299658 |
| NOMO2       | 16p12.3          | 0.066756 | 0.192945 | 0.299729 |
| RANBP6      | 9p24.1           | 0.066738 | 0.193064 | 0.299891 |
| C6ORF52     | 6p24.2           | 0.066716 | 0.193216 | 0.300104 |
| TMEM30CP    | 3q12.1           | 0.066675 | 0.193489 | 0.300504 |
| KLF3        | 4p14             | -0.06667 | 0.193514 | 0.300519 |
| CCNJ        | 10q24.1          | 0.066667 | 0.193545 | 0.300525 |
| DAO         | 12q24.11         | -0.06667 | 0.193555 | 0.300525 |
| ANKRD13C    | 1p31.1           | -0.06666 | 0.193563 | 0.300525 |
| NDUFB4      | 3q13.33          | -0.06665 | 0.193627 | 0.300583 |
| OR2G3       | 1q44             | -0.06665 | 0.19363  | 0.300583 |
| CABLES1     | 18q11.2          | 0.06664  | 0.193723 | 0.300704 |
| ZC3H12C     | 11q22.3          | -0.06663 | 0.19378  | 0.30077  |
| PRKACG      | 9q21.11          | 0.066622 | 0.193845 | 0.300848 |
| NFE2L3P2    | 17q21.32         | 0.066614 | 0.193897 | 0.300905 |
| CABP2       | 11q13.2          | -0.06661 | 0.193934 | 0.30094  |
| ESS2        | 22q11.21 22q11.2 | 0.066598 | 0.194006 | 0.301027 |
| DDAH2       | 6p21.33          | -0.06658 | 0.194159 | 0.301241 |
| CGB2        | 19q13.33         | -0.06652 | 0.194526 | 0.301787 |
| IDH3G       | Xq28             | 0.066518 | 0.194541 | 0.301787 |
| IL1RL1      | 2q12.1           | -0.06652 | 0.194558 | 0.301791 |
| LRRC39      | 1p21.2           | 0.066509 | 0.194602 | 0.301836 |
| SEC24B      | 4q25             | -0.06649 | 0.194729 | 0.302005 |
| PWAR5       | 15q11.2          | -0.06649 | 0.194742 | 0.302005 |
| ROGDI       | 16p13.3          | 0.06648  | 0.194797 | 0.302067 |
| F5          | 1q24.2           | -0.06648 | 0.19482  | 0.30208  |
| ZNF638      | 2p13.3-p13.2     | 0.066467 | 0.194888 | 0.302162 |
| TUBA3C      | 13q12.11         | 0.066464 | 0.194903 | 0.302162 |
| ALS2        | 2q33.1           | 0.066442 | 0.195052 | 0.30236  |
| AWAT2       | Xq13.1           | -0.06644 | 0.195072 | 0.30236  |
| PLCXD2      | 3q13.2           | -0.06644 | 0.195077 | 0.30236  |
| RBL2        | 16q12.2          | -0.06643 | 0.195156 | 0.302461 |
| KLHL12      | 1q32.1           | 0.066418 | 0.195216 | 0.302529 |
| COL18A1-AS1 | 21q22.3          | 0.066416 | 0.195232 | 0.302531 |
| TMEM69      | 1p34.1           | -0.06641 | 0.195284 | 0.302588 |
| ACTR3BP2    | 2p11.1           | -0.0664  | 0.195354 | 0.302674 |
| EHD1        | 11q13.1          | -0.06639 | 0.195425 | 0.30276  |
| ABHD17C     | 15q25.1          | 0.06638  | 0.195473 | 0.302811 |
| PPP1R36     | 14q23.3          | -0.06635 | 0.195685 | 0.303116 |
| ATP13A4     | 3q29             | -0.06634 | 0.195727 | 0.303157 |
| NDUFS1      | 2q33.3           | 0.066329 | 0.195819 | 0.303276 |

|           |          |          |          |          |
|-----------|----------|----------|----------|----------|
| CHSY1     | 15q26.3  | -0.06631 | 0.195957 | 0.303466 |
| PIWIL3    | 22q11.23 | -0.0663  | 0.195982 | 0.303481 |
| CHD2      | 15q26.1  | 0.066299 | 0.196019 | 0.303516 |
| TMA16     | 4q32.2   | -0.06629 | 0.196059 | 0.303554 |
| MON1B     | 16q23.1  | 0.066275 | 0.19618  | 0.303717 |
| GRM1      | 6q24.3   | -0.06627 | 0.196196 | 0.303719 |
| CASP6     | 4q25     | -0.06623 | 0.196467 | 0.304095 |
| IPO8      | 12p11.21 | -0.06623 | 0.196475 | 0.304095 |
| ZNF763    | 19p13.2  | -0.06623 | 0.196484 | 0.304095 |
| ZNF124    | 1q44     | 0.06621  | 0.196621 | 0.304283 |
| HIST1H2BN | 6p22.1   | 0.066203 | 0.196667 | 0.304331 |
| RSL1D1    | 16p13.13 | -0.06619 | 0.196752 | 0.30444  |
| ATP11AUN  | 13q34    | 0.066187 | 0.196774 | 0.30445  |
| CCDC51    | 3p21.31  | 0.066165 | 0.196925 | 0.304637 |
| VWC2      | 7p12.2   | -0.06616 | 0.196926 | 0.304637 |
| TNFRSF21  | 6p12.3   | 0.066163 | 0.196941 | 0.304637 |
| OR4N3P    | 15q11.2  | 0.066159 | 0.196969 | 0.304656 |
| CT45A1    | Xq26.3   | -0.06613 | 0.197166 | 0.304938 |
| ZNF711    | Xq21.1   | 0.066126 | 0.197191 | 0.304953 |
| VASP      | 19q13.32 | 0.066112 | 0.197286 | 0.305076 |
| TFE3      | Xp11.23  | -0.0661  | 0.197341 | 0.305138 |
| CXCL5     | 4q13.3   | 0.066083 | 0.197483 | 0.305334 |
| OR10A2    | 11p15.4  | 0.066081 | 0.197499 | 0.305336 |
| SAMM50    | 22q13.31 | -0.06607 | 0.197593 | 0.305457 |
| GPX2      | 14q23.3  | -0.06606 | 0.197648 | 0.305519 |
| C20ORF173 | 20q11.22 | 0.066053 | 0.197683 | 0.305549 |
| CXCR1     | 2q35     | -0.06601 | 0.197963 | 0.305958 |
| FABP1     | 2p11.2   | -0.06601 | 0.197996 | 0.305985 |
| ELP4      | 11p13    | 0.066004 | 0.198022 | 0.306002 |
| OR4F6     | 15q26.3  | 0.065978 | 0.198197 | 0.306249 |
| ABCC6P2   | 16p13.11 | -0.06596 | 0.198314 | 0.306406 |
| DNAH3     | 16p12.3  | 0.065954 | 0.198362 | 0.306457 |
| UTP14A    | Xq26.1   | 0.065929 | 0.198528 | 0.30669  |
| FBXO42    | 1p36.13  | 0.065918 | 0.198609 | 0.306746 |
| POMGNT2   | 3p22.1   | -0.06592 | 0.198615 | 0.306746 |
| ATF7      | 12q13.13 | -0.06592 | 0.198622 | 0.306746 |
| SNORA51   | 20p13    | 0.065914 | 0.198635 | 0.306746 |
| FOXO3     | 6q21     | -0.06591 | 0.198641 | 0.306746 |
| RAB40A    | Xq22.2   | -0.06591 | 0.198684 | 0.306788 |
| RAB3D     | 19p13.2  | 0.065899 | 0.198737 | 0.306847 |
| MRPL42P5  | 15q15.1  | -0.06589 | 0.198803 | 0.306919 |
| CLCN4     | Xp22.2   | 0.065887 | 0.198818 | 0.306919 |
| CST11     | 20p11.21 | 0.065885 | 0.19883  | 0.306919 |
| NR2E1     | 6q21     | -0.06588 | 0.198852 | 0.30693  |
| GBA3      | 4p15.2   | -0.06586 | 0.198993 | 0.307124 |
| CAMK2A    | 5q32     | 0.065856 | 0.199029 | 0.307146 |
| LRRC19    | 9p21.2   | -0.06585 | 0.199039 | 0.307146 |
| CELF6     | 15q23    | 0.06585  | 0.199068 | 0.307156 |
| ZNF444    | 19q13.43 | 0.065849 | 0.199075 | 0.307156 |
| ESPN      | 1p36.31  | -0.06584 | 0.199168 | 0.307258 |
| IRF1      | 5q31.1   | -0.06584 | 0.199172 | 0.307258 |
| ELAC1     | 18q21.2  | -0.06583 | 0.199239 | 0.307338 |
| RNF112    | 17p11.2  | -0.06582 | 0.199273 | 0.307367 |
| FIZ1      | 19q13.42 | 0.065776 | 0.199576 | 0.30781  |
| ACADS     | 12q24.31 | -0.06576 | 0.199718 | 0.308005 |
| BLZF1     | 1q24.2   | 0.065751 | 0.199747 | 0.308025 |
| SCARNA20  | 17q23.2  | -0.06575 | 0.19978  | 0.308054 |
| ZNF518A   | 10q24.1  | 0.065699 | 0.200108 | 0.308534 |

|           |          |          |          |          |
|-----------|----------|----------|----------|----------|
| IL17REL   | 22q13.33 | 0.065688 | 0.200184 | 0.308629 |
| PRSS1     | 7q34     | -0.06568 | 0.200234 | 0.308683 |
| RNF149    | 2q11.2   | -0.06568 | 0.200269 | 0.30871  |
| GLT6D1    | 9q34.3   | -0.06567 | 0.200283 | 0.30871  |
| ECHDC3    | 10p14    | -0.06567 | 0.200318 | 0.30874  |
| CDY2B     | Yq11.222 | -0.06566 | 0.200383 | 0.30878  |
| DDB2      | 11p11.2  | -0.06566 | 0.200385 | 0.30878  |
| IRF4      | 6p25.3   | -0.06566 | 0.20039  | 0.30878  |
| LVRN      | 5q23.1   | -0.06565 | 0.200427 | 0.308813 |
| MXD1      | 2p13.3   | 0.065648 | 0.200455 | 0.308824 |
| ATXN10    | 22q13.31 | -0.06565 | 0.200465 | 0.308824 |
| ZFY       | Yp11.2   | -0.06562 | 0.200666 | 0.30911  |
| PAX4      | 7q32.1   | 0.065613 | 0.200695 | 0.309122 |
| LCK       | 1p35.2   | -0.06561 | 0.200705 | 0.309122 |
| RNASE8    | 14q11.2  | 0.065608 | 0.200728 | 0.309133 |
| IL20RA    | 6q23.3   | -0.0656  | 0.200772 | 0.309178 |
| ZNF706    | 8q22.3   | -0.0656  | 0.200806 | 0.309206 |
| LINC00598 | 13q14.11 | 0.065593 | 0.200834 | 0.309226 |
| RNF39     | 6p22.1   | 0.065584 | 0.200892 | 0.309292 |
| TRMT44    | 4p16.1   | 0.06558  | 0.200921 | 0.30931  |
| TOP2B     | 3p24.2   | -0.06558 | 0.200935 | 0.30931  |
| NCAN      | 19p13.11 | -0.06557 | 0.200996 | 0.30938  |
| CTAGE11P  | 13q22.2  | -0.06554 | 0.201221 | 0.309702 |
| KLC3      | 19q13.32 | 0.065532 | 0.201253 | 0.309729 |
| RPS21     | 20q13.33 | -0.06552 | 0.201371 | 0.309885 |
| ICE2      | 15q22.2  | -0.06548 | 0.201599 | 0.310201 |
| RAB24     | 5q35.3   | 0.06548  | 0.201614 | 0.310201 |
| SNORA28   | 14q32.32 | 0.065479 | 0.201622 | 0.310201 |
| THAP11    | 16q22.1  | -0.06547 | 0.2017   | 0.310297 |
| TEPP      | 16q21    | -0.06546 | 0.201727 | 0.310315 |
| PPP1R27   | 17q25.3  | 0.06545  | 0.20182  | 0.310434 |
| SNAR-E    | 19q13.32 | 0.065437 | 0.201908 | 0.310522 |
| ALDH18A1  | 10q24.1  | 0.065437 | 0.201908 | 0.310522 |
| CASP7     | 10q25.3  | 0.065432 | 0.201944 | 0.310545 |
| CES4A     | 16q22.1  | 0.06543  | 0.201954 | 0.310545 |
| IL17F     | 6p12.2   | -0.06543 | 0.20197  | 0.310546 |
| CLINT1    | 5q33.3   | 0.065418 | 0.202044 | 0.310635 |
| CARS2     | 13q34    | 0.065413 | 0.202075 | 0.310651 |
| GNAS      | 20q13.32 | -0.06541 | 0.202085 | 0.310651 |
| AIDA      | 1q41     | 0.065355 | 0.202475 | 0.311227 |
| VSIG10    | 12q24.23 | 0.065343 | 0.202562 | 0.311336 |
| USP19     | 3p21.31  | 0.065323 | 0.202699 | 0.311523 |
| OR2T8     | 1q44     | 0.06532  | 0.202719 | 0.311529 |
| ZNF486    | 19p12    | -0.06531 | 0.202777 | 0.311594 |
| GLRA3     | 4q34.1   | -0.06529 | 0.202922 | 0.311793 |
| P2RX3     | 11q12.1  | -0.06529 | 0.202945 | 0.311805 |
| PRAMEF16  | 1p36.21  | -0.06527 | 0.203035 | 0.311911 |
| PSME2     | 14q12    | 0.065273 | 0.203045 | 0.311911 |
| PALM3     | 19p13.12 | -0.06525 | 0.20323  | 0.312172 |
| ANXA2P1   | 4q31.3   | -0.06524 | 0.203295 | 0.312247 |
| RNF133    | 7q31.32  | 0.065232 | 0.203327 | 0.312272 |
| USP5      | 12p13.31 | 0.065226 | 0.203368 | 0.312311 |
| ZNF155    | 19q13.31 | -0.0652  | 0.203541 | 0.312537 |
| FAM216A   | 12q24.11 | 0.065201 | 0.203546 | 0.312537 |
| AFAP1L2   | 10q25.3  | 0.065195 | 0.203585 | 0.312572 |
| IGFL4     | 19q13.32 | -0.06519 | 0.203629 | 0.312615 |
| CCAR2     | 8p21.3   | 0.065184 | 0.203666 | 0.312648 |
| UFD1      | 22q11.21 | 0.065156 | 0.203857 | 0.312919 |



|           |             |          |          |          |
|-----------|-------------|----------|----------|----------|
| SLC16A8   | 22q13.1     | 0.065153 | 0.203879 | 0.312928 |
| CENPX     | 17q25.3     | 0.065138 | 0.203983 | 0.313054 |
| KCNH4     | 17q21.2     | 0.065137 | 0.203992 | 0.313054 |
| INVS      | 9q31.1      | 0.065127 | 0.204056 | 0.313128 |
| EFNA2     | 19p13.3     | 0.065109 | 0.204185 | 0.313302 |
| SNORA71A  | 20q11.23    | 0.065102 | 0.20423  | 0.313347 |
| SNAR-A2   | 19q13.33    | -0.06509 | 0.204315 | 0.313453 |
| UNG       | 12q24.11    | 0.065086 | 0.204344 | 0.313474 |
| GYG2      | Xp22.33     | -0.06507 | 0.204448 | 0.313578 |
| TBC1D28   | 17p11.2     | -0.06507 | 0.204459 | 0.313578 |
| SPOCD1    | 1p35.2      | -0.06507 | 0.20447  | 0.313578 |
| ANXA4     | 2p13.3      | -0.06507 | 0.204475 | 0.313578 |
| POM121C   | 7q11.23     | 0.065053 | 0.204572 | 0.313704 |
| HYAL6P    | 7q31.32     | -0.06504 | 0.204663 | 0.313818 |
| FITM2     | 20q13.12    | -0.06501 | 0.204856 | 0.314091 |
| CXXC5     | 5q31.2      | -0.06501 | 0.204877 | 0.314099 |
| UXT-AS1   | Xp11.23     | 0.064997 | 0.204967 | 0.314213 |
| WDR72     | 15q21.3     | -0.06496 | 0.205194 | 0.314537 |
| CYP4A22   | 1p33        | 0.064951 | 0.205285 | 0.314652 |
| SNORA63   | 3q27.3      | 0.064948 | 0.205311 | 0.314667 |
| HACD1     | 10p12.33    | 0.064945 | 0.205331 | 0.314675 |
| ANO1      | 11q13.3     | -0.06494 | 0.205369 | 0.314709 |
| KLRK1     | 12p13.2     | -0.06494 | 0.205389 | 0.314716 |
| FLOT2     | 17q11.2     | -0.06491 | 0.20556  | 0.314954 |
| EIF2B3    | 1p34.1      | 0.064905 | 0.205612 | 0.315008 |
| GRIN2B    | 12p13.1     | 0.064899 | 0.205648 | 0.315039 |
| FAM221B   | 9p13.3      | 0.064896 | 0.205672 | 0.315052 |
| HS3ST1    | 4p15.33     | -0.06489 | 0.205738 | 0.315124 |
| STH       | 17q21.31    | 0.064885 | 0.205751 | 0.315124 |
| OR2T34    | 1q44        | -0.06487 | 0.205849 | 0.315251 |
| S100G     | Xp22.2      | 0.064857 | 0.205945 | 0.315373 |
| SLIT1     | 10q24.1     | -0.06484 | 0.206069 | 0.315539 |
| SLC39A1   | 1q21.3      | 0.064818 | 0.206219 | 0.315726 |
| CDK13     | 7p14.1      | 0.064817 | 0.206222 | 0.315726 |
| TAS2R38   | 7q34        | 0.064804 | 0.206318 | 0.315849 |
| PSG1      | 19q13.2     | -0.0648  | 0.206353 | 0.315878 |
| MTMR3     | 22q12.2     | -0.06478 | 0.206509 | 0.316093 |
| LOC553137 | 6q21        | -0.06477 | 0.20658  | 0.316177 |
| HSPA4     | 5q31.1      | 0.064761 | 0.206621 | 0.316216 |
| SYBU      | 8q23.2      | -0.06473 | 0.206821 | 0.316498 |
| CKLF      | 16q21       | 0.064707 | 0.206997 | 0.316742 |
| CAND1     | 12q14.3-q15 | 0.064695 | 0.207084 | 0.316852 |
| C7ORF13   | 7q36.3      | -0.06467 | 0.207256 | 0.31709  |
| KIF3A     | 5q31.1      | -0.06467 | 0.207275 | 0.317096 |
| KCNJ6     | 21q22.13    | -0.06466 | 0.207333 | 0.31716  |
| PHF12     | 17q11.2     | 0.064644 | 0.207444 | 0.317305 |
| EIF3K     | 19q13.2     | 0.064633 | 0.207518 | 0.317394 |
| C10ORF67  | 10p12.2     | -0.06463 | 0.20757  | 0.31745  |
| SLITRK2   | Xq27.3      | -0.06462 | 0.207608 | 0.317484 |
| ALG8      | 11q14.1     | -0.0646  | 0.20775  | 0.317677 |
| MED8      | 1p34.2      | -0.06459 | 0.207788 | 0.31771  |
| ACP1      | 2p25.3      | -0.06458 | 0.207878 | 0.317823 |
| S100PBP   | 1p35.1      | 0.064568 | 0.207975 | 0.317933 |
| DAPL1     | 2q24.1      | -0.06457 | 0.207983 | 0.317933 |
| LINC02433 | 4q32.1      | -0.06456 | 0.208004 | 0.317933 |
| GATA1     | Xp11.23     | -0.06456 | 0.208013 | 0.317933 |
| DPF3      | 14q24.2     | -0.06455 | 0.208093 | 0.318032 |
| CLCNKA    | 1p36.13     | -0.06454 | 0.208174 | 0.318094 |

|          |            |          |          |          |
|----------|------------|----------|----------|----------|
| POLR2J3  | 7q22.1     | 0.06454  | 0.208175 | 0.318094 |
| UQCRC1   | 3p21.31    | 0.064539 | 0.208182 | 0.318094 |
| RPS5     | 19q13.43   | -0.06453 | 0.208271 | 0.318206 |
| EML4     | 2p21       | 0.064517 | 0.208334 | 0.318277 |
| MTREX    | 5q11.2     | 0.0645   | 0.208457 | 0.318441 |
| ACY3     | 11q13.2    | 0.06449  | 0.208527 | 0.318524 |
| DPP4     | 2q24.2     | 0.064472 | 0.208655 | 0.318694 |
| NPM1     | 5q35.1     | 0.06447  | 0.20867  | 0.318694 |
| KHNYN    | 14q12      | 0.064443 | 0.208863 | 0.318965 |
| FAHD2A   | 2q11.1     | -0.0644  | 0.209185 | 0.319432 |
| PTX4     | 16p13.3    | 0.064394 | 0.209205 | 0.319438 |
| IFT172   | 2p23.3     | -0.06438 | 0.209293 | 0.319549 |
| ICOSLG   | 21q22.3    | -0.06437 | 0.209364 | 0.319632 |
| C16ORF74 | 16q24.1    | -0.06436 | 0.209417 | 0.319689 |
| FAM149A  | 4q35.1     | 0.064344 | 0.209565 | 0.319891 |
| TAL1     | 1p33       | -0.06432 | 0.209761 | 0.320165 |
| C9ORF40  | 9q21.13    | 0.064303 | 0.20985  | 0.320276 |
| SPRYD4   | 12q13.3    | -0.06429 | 0.209957 | 0.320415 |
| APOA4    | 11q23.3    | -0.06428 | 0.210038 | 0.320508 |
| CHCHD3   | 7q32.3-q33 | 0.064275 | 0.21005  | 0.320508 |
| CCDC172  | 10q25.3    | 0.064263 | 0.210139 | 0.32062  |
| OR52B4   | 11p15.4    | 0.064247 | 0.210247 | 0.320761 |
| RIMBP3   | 22q11.21   | -0.06423 | 0.210351 | 0.32088  |
| CCDC25   | 8p21.1     | -0.06423 | 0.210358 | 0.32088  |
| SNORA64  | 16p13.3    | -0.06423 | 0.210387 | 0.320887 |
| PROSER2  | 10p14      | -0.06423 | 0.210394 | 0.320887 |
| SH3D21   | 1p34.3     | 0.064218 | 0.210454 | 0.320954 |
| DMAC2L   | 14q21.3    | -0.06421 | 0.210542 | 0.321063 |
| P2RX2    | 12q24.33   | 0.064192 | 0.210639 | 0.321187 |
| OR1L8    | 9q33.2     | -0.06418 | 0.210711 | 0.321271 |
| GNG8     | 19q13.32   | -0.06418 | 0.210747 | 0.321302 |
| OR52W1   | 11p15.4    | 0.064167 | 0.210818 | 0.321386 |
| TMEM178A | 2p22.1     | 0.064152 | 0.210926 | 0.321514 |
| NLRP2    | 19q13.42   | -0.06415 | 0.210934 | 0.321514 |
| CCL3L1   | 17q21.1    | -0.06414 | 0.210988 | 0.321572 |
| SPINDOC  | 11q13.1    | 0.064133 | 0.211063 | 0.321662 |
| CHUK     | 10q24.31   | 0.06412  | 0.211157 | 0.32178  |
| SPDYC    | 11q13.1    | -0.06412 | 0.211191 | 0.321808 |
| ILF3-DT  | 19p13.2    | -0.06411 | 0.211223 | 0.321832 |
| NEU4     | 2q37.3     | 0.064067 | 0.211533 | 0.322281 |
| B3GNTL1  | 17q25.3    | 0.064062 | 0.211572 | 0.32229  |
| SAMD9    | 7q21.2     | -0.06406 | 0.211572 | 0.32229  |
| MYD88    | 3p22.2     | -0.06404 | 0.211704 | 0.322467 |
| LRTOMT   | 11q13.4    | 0.064025 | 0.211835 | 0.32263  |
| FTMT     | 5q23.1     | 0.064024 | 0.211843 | 0.32263  |
| PAPOLB   | 7p22.1     | -0.064   | 0.21202  | 0.322875 |
| ODF1     | 8q22.3     | -0.06398 | 0.212137 | 0.323028 |
| CCSER1   | 4q22.1     | -0.06398 | 0.212168 | 0.32305  |
| ZSWIM8   | 10q22.2    | 0.063969 | 0.212234 | 0.323127 |
| PATZ1    | 22q12.2    | -0.06394 | 0.212451 | 0.323433 |
| MRPS18C  | 4q21.23    | -0.06393 | 0.212481 | 0.323453 |
| ZNF233   | 19q13.31   | -0.06392 | 0.212569 | 0.323543 |
| OTUD7A   | 15q13.3    | -0.06392 | 0.212573 | 0.323543 |
| RCE1     | 11q13.2    | -0.06392 | 0.212603 | 0.323543 |
| PTCD2    | 5q13.2     | 0.063917 | 0.212604 | 0.323543 |
| PATE4    | 11q24.2    | 0.063915 | 0.212622 | 0.323546 |
| CDH20    | 18q21.33   | -0.0639  | 0.212723 | 0.323673 |
| CAP1     | 1p34.2     | -0.0639  | 0.212738 | 0.323673 |

|           |          |          |          |          |
|-----------|----------|----------|----------|----------|
| CFHR5     | 1q31.3   | -0.06389 | 0.212805 | 0.32375  |
| CDKL4     | 2p22.1   | -0.06387 | 0.212911 | 0.323875 |
| CDR2L     | 17q25.1  | 0.063874 | 0.212919 | 0.323875 |
| AHSP      | 16p11.2  | -0.06384 | 0.213153 | 0.324192 |
| CCR6      | 6q27     | 0.06384  | 0.21316  | 0.324192 |
| DDX47     | 12p13.1  | -0.06383 | 0.213199 | 0.324222 |
| CLDN17    | 21q21.3  | -0.06383 | 0.213213 | 0.324222 |
| TBC1D3G   | 17q12    | 0.063816 | 0.213332 | 0.324379 |
| SEPTIN11  | 4q21.1   | -0.06379 | 0.213487 | 0.32459  |
| BNIP3     | 10q26.3  | -0.06379 | 0.21355  | 0.324662 |
| POLR2D    | 2q14.3   | 0.063771 | 0.213659 | 0.324792 |
| TAPT1     | 4p15.32  | -0.06377 | 0.213668 | 0.324792 |
| SILC1     | 2p25.2   | -0.06377 | 0.213696 | 0.32481  |
| HAPLN1    | 5q14.3   | -0.06375 | 0.2138   | 0.324944 |
| GOLGA6D   | 15q24.2  | -0.06374 | 0.21386  | 0.325009 |
| TEKT3     | 17p12    | -0.06373 | 0.213984 | 0.325173 |
| GRM8      | 7q31.33  | -0.06369 | 0.214204 | 0.325483 |
| MAGOH     | 1p32.3   | 0.063686 | 0.214267 | 0.325553 |
| PRSS22    | 16p13.3  | -0.06368 | 0.214329 | 0.325621 |
| MAP4      | 3p21.31  | -0.06367 | 0.214355 | 0.325621 |
| ARHGFEF38 | 4q24     | 0.063673 | 0.21436  | 0.325621 |
| ARHGFEF9  | Xq11.1   | 0.063667 | 0.214403 | 0.325662 |
| STRIP1    | 1p13.3   | -0.06366 | 0.214444 | 0.325699 |
| TBC1D4    | 13q22.2  | 0.063655 | 0.214492 | 0.325747 |
| HIST1H2BE | 6p22.2   | 0.06365  | 0.214527 | 0.325777 |
| RPL23     | 17q12    | -0.06364 | 0.214586 | 0.325841 |
| ZBTB44    | 11q24.3  | -0.06363 | 0.214658 | 0.325925 |
| DOP1B     | 21q22.12 | 0.063619 | 0.214754 | 0.326047 |
| TTC24     | 1q22     | 0.063607 | 0.214838 | 0.326149 |
| SEPTIN7P9 | 10p11.1  | 0.063586 | 0.214993 | 0.32636  |
| HINT2     | 9p13.3   | 0.063578 | 0.215047 | 0.326417 |
| KRT33B    | 17q21.2  | -0.06357 | 0.215139 | 0.326521 |
| DNAJC10   | 2q32.1   | -0.06356 | 0.215148 | 0.326521 |
| WEE2      | 7q34     | -0.06355 | 0.215236 | 0.32663  |
| TSPAN32   | 11p15.5  | -0.06354 | 0.215291 | 0.326689 |
| LINC00323 | 21q22.2  | 0.06354  | 0.215325 | 0.326715 |
| ZSCAN25   | 7q22.1   | -0.0635  | 0.215637 | 0.327164 |
| COA1      | 7p13     | 0.063491 | 0.215678 | 0.327201 |
| LINC00515 | 21q21.3  | 0.06346  | 0.215906 | 0.327522 |
| GPR78     | 4p16.1   | 0.06345  | 0.215974 | 0.3276   |
| KIAA1324L | 7q21.12  | -0.06344 | 0.216018 | 0.327642 |
| SH2D1B    | 1q23.3   | -0.06342 | 0.216166 | 0.327842 |
| TRMT61B   | 2p23.2   | -0.06342 | 0.216201 | 0.32787  |
| KIR3DX1   | 19q13.42 | 0.0634   | 0.216334 | 0.328048 |
| DTX3L     | 3q21.1   | 0.063364 | 0.216598 | 0.328422 |
| POF1B     | Xq21.1   | 0.06335  | 0.216698 | 0.328549 |
| RASIP1    | 19q13.33 | -0.06332 | 0.216917 | 0.328857 |
| RGS21     | 1q31.2   | -0.0633  | 0.217038 | 0.329016 |
| TBC1D20   | 20p13    | -0.06327 | 0.217251 | 0.329295 |
| SLC25A47  | 14q32.2  | -0.06327 | 0.217256 | 0.329295 |
| AGO1      | 1p34.3   | -0.06327 | 0.217273 | 0.329296 |
| APOC4     | 19q13.32 | -0.06326 | 0.217363 | 0.329408 |
| TSEN15    | 1q25.3   | 0.063232 | 0.217557 | 0.329677 |
| MKNK2     | 19p13.3  | 0.063221 | 0.217638 | 0.329775 |
| PRPF6     | 20q13.33 | -0.06321 | 0.217724 | 0.329881 |
| EIF5AL1   | 10q22.3  | 0.063207 | 0.217743 | 0.329885 |
| FPR2      | 19q13.41 | -0.0632  | 0.217769 | 0.329899 |
| ALOX12B   | 17p13.1  | -0.0632  | 0.217807 | 0.329926 |

|           |                 |          |          |          |
|-----------|-----------------|----------|----------|----------|
| MALSU1    | 7p15.3          | 0.063196 | 0.21782  | 0.329926 |
| DNAJC27   | 2p23.3          | -0.06319 | 0.217876 | 0.329986 |
| SRGAP1    | 12q14.2         | -0.06318 | 0.21794  | 0.330057 |
| JPH3      | 16q24.2         | -0.06317 | 0.218019 | 0.330152 |
| ZNF518B   | 4p16.1          | -0.06316 | 0.218108 | 0.330262 |
| RAB3A     | 19p13.11        | 0.063154 | 0.218129 | 0.330269 |
| MTMR1     | Xq28            | 0.063128 | 0.218319 | 0.330511 |
| PHF20     | 20q11.22-q11.23 | -0.06313 | 0.218336 | 0.330511 |
| EZH1P     | Xp11.22         | -0.06313 | 0.218338 | 0.330511 |
| TRIOBP    | 22q13.1         | 0.063118 | 0.218393 | 0.330568 |
| DAG1      | 3p21.31         | 0.063102 | 0.218506 | 0.330715 |
| HERC2P4   | 16p11.2         | -0.0631  | 0.218527 | 0.330722 |
| PPP1R3F   | Xp11.23         | 0.063092 | 0.218581 | 0.330779 |
| LGALS9C   | 17p11.2         | -0.06309 | 0.218614 | 0.330804 |
| ASB12     | Xq11.2          | -0.06308 | 0.218688 | 0.330869 |
| MOGAT1    | 2q36.1          | 0.063077 | 0.21869  | 0.330869 |
| RNF214    | 11q23.3         | -0.06306 | 0.218844 | 0.331077 |
| PPM1H     | 12q14.1-q14.2   | -0.06305 | 0.218865 | 0.331083 |
| SF3B2     | 11q13.1         | 0.063051 | 0.218885 | 0.331089 |
| SORCS3    | 10q25.1         | -0.06305 | 0.218903 | 0.33109  |
| C1ORF141  | 1p31.3          | 0.06304  | 0.218963 | 0.331157 |
| FAM25BP   | 10q11.22        | -0.06302 | 0.219088 | 0.3313   |
| KIRREL2   | 19q13.12        | -0.06302 | 0.219107 | 0.3313   |
| GDAP1L1   | 20q13.12        | 0.06302  | 0.219107 | 0.3313   |
| CLDN23    | 8p23.1          | -0.06301 | 0.219158 | 0.331329 |
| IRF5      | 7q32.1          | -0.06301 | 0.21916  | 0.331329 |
| GPR20     | 8q24.3          | -0.063   | 0.21922  | 0.331395 |
|           | 11-Mar 5p15.1   | -0.063   | 0.219266 | 0.331439 |
| ATF3      | 1q32.3          | -0.06299 | 0.219362 | 0.331559 |
| TRAPPC9   | 8q24.3          | 0.062969 | 0.219483 | 0.331718 |
| OR4M1     | 14q11.2         | -0.06295 | 0.219612 | 0.331888 |
| CXADRP3   | 18p11.21        | -0.06292 | 0.219866 | 0.332242 |
| IK        | 5q31.3          | -0.06291 | 0.21988  | 0.332242 |
| LRRC6     | 8q24.22         | 0.062907 | 0.219942 | 0.33231  |
| GAST      | 17q21.2         | -0.0629  | 0.219958 | 0.33231  |
| RAMP1     | 2q37.3          | -0.0629  | 0.219976 | 0.332313 |
| QRSL1     | 6q21            | 0.062895 | 0.220026 | 0.332362 |
| BCLAF3    | Xp22.12         | -0.06289 | 0.220081 | 0.33242  |
| PCDHGA10  | 5q31.3          | -0.06287 | 0.220206 | 0.332584 |
| SYT14P1   | 4q13.2          | -0.06286 | 0.220313 | 0.332721 |
| GJC3      | 7q22.1          | -0.06285 | 0.220379 | 0.332796 |
| FOXE1     | 9q22.33         | -0.06279 | 0.220823 | 0.333441 |
| RNASE11   | 14q11.2         | 0.06278  | 0.220875 | 0.333493 |
| GCG       | 2q24.2          | 0.062772 | 0.220932 | 0.333555 |
| SOX8      | 16p13.3         | 0.06276  | 0.221017 | 0.333659 |
| NUCB2     | 11p15.1         | -0.06275 | 0.221067 | 0.333708 |
| GZF1      | 20p11.21        | -0.06268 | 0.221621 | 0.33452  |
| SH2B2     | 7q22.1          | 0.06265  | 0.221829 | 0.334809 |
| MIR155HG  | -               | 0.062646 | 0.22186  | 0.334824 |
| LOC440173 | 9q21.33         | -0.06264 | 0.221883 | 0.334824 |
| CNOT11    | 2q11.2          | 0.062642 | 0.22189  | 0.334824 |
| PPP1R14D  | 15q15.1         | -0.06263 | 0.221958 | 0.334902 |
| LKAAEAR1  | 20q13.33        | -0.0626  | 0.22219  | 0.335227 |
| PPIAP80   | 7p15.1          | -0.06259 | 0.222297 | 0.335362 |
| SEMA6B    | 19p13.3         | -0.06256 | 0.222518 | 0.33567  |
| LAP3      | 4p15.32         | -0.06254 | 0.222648 | 0.335818 |
| LOC93429  | 19q13.32        | -0.06254 | 0.222649 | 0.335818 |
| USP42     | 7p22.1          | 0.062532 | 0.222707 | 0.335881 |

|             |                   |          |          |          |
|-------------|-------------------|----------|----------|----------|
| FMO5        | 1q21.1            | -0.06249 | 0.223001 | 0.336257 |
| GIPC2       | 1p31.1            | -0.06249 | 0.223001 | 0.336257 |
| UBE3B       | 12q24.11          | 0.062488 | 0.223033 | 0.336257 |
| SNORA11D    | Xp11.22           | 0.062487 | 0.223041 | 0.336257 |
| TMEM202     | 15q23-q24.1       | -0.06249 | 0.223041 | 0.336257 |
| RLBP1       | 15q26.1           | -0.06248 | 0.223081 | 0.336292 |
| FAM83A-AS1  | 8q24.13           | 0.062478 | 0.223109 | 0.336309 |
| SNORD115-13 | 15q11.2           | -0.06247 | 0.223147 | 0.336318 |
| BAHD1       | 15q15.1           | 0.062472 | 0.223148 | 0.336318 |
| KIR3DP1     | 19q13.42          | -0.06247 | 0.223187 | 0.336351 |
| COL5A3      | 19p13.2           | 0.062453 | 0.223289 | 0.336479 |
| RNGTT       | 6q15              | 0.062442 | 0.223375 | 0.336584 |
| IRX3        | 16q12.2           | -0.06243 | 0.223436 | 0.33665  |
| SNORA71D    | 20q11.23          | 0.06242  | 0.223535 | 0.336774 |
| KCNAB2      | 1p36.31           | -0.06241 | 0.223626 | 0.336886 |
| SPATA1      | 1p22.3            | -0.06239 | 0.223775 | 0.337055 |
| ERN1        | 17q23.3           | -0.06239 | 0.223777 | 0.337055 |
| MUCL3       | 6p21.33           | 0.062386 | 0.223789 | 0.337055 |
| LYST        | 1q42.3            | 0.06238  | 0.223833 | 0.337096 |
| PRF1        | 10q22.1           | -0.06238 | 0.22385  | 0.337097 |
| ANKRD34B    | 5q14.1            | -0.06237 | 0.22392  | 0.337176 |
| ZNF160      | 19q13.41-q13.42   | 0.062349 | 0.224068 | 0.337374 |
| CSAG3       | Xq28              | -0.06234 | 0.224143 | 0.337444 |
| HSD17B10    | Xp11.22           | 0.062338 | 0.224149 | 0.337444 |
| TRIM77      | 11q14.3           | 0.062336 | 0.224165 | 0.337444 |
| LMF2        | 22q13.33          | 0.06233  | 0.224208 | 0.337483 |
| IL36RN      | 2q14.1            | -0.06232 | 0.224259 | 0.337529 |
| CPS1        | 2q34              | -0.06232 | 0.224272 | 0.337529 |
| CASK        | Xp11.4            | -0.06232 | 0.224294 | 0.337537 |
| SLC39A9     | 14q24.1           | -0.06231 | 0.224344 | 0.337587 |
| DUSP10      | 1q41              | -0.06229 | 0.224509 | 0.33781  |
| P4HTM       | 3p21.31 3p21.3    | 0.062281 | 0.224572 | 0.337879 |
| SUB1        | 5p13.3            | -0.06227 | 0.224643 | 0.337941 |
| STMN3       | 20q13.33          | -0.06227 | 0.224647 | 0.337941 |
| OSTF1       | 9q21.13           | -0.06225 | 0.224826 | 0.338184 |
| TINAGL1     | 1p35.2            | -0.06224 | 0.224895 | 0.338263 |
| ZNF546      | 19q13.2           | -0.06223 | 0.224925 | 0.338283 |
| MRPS35      | 12p11.22          | 0.062227 | 0.224977 | 0.338335 |
| CYP11B1-AS1 | 2p22.2            | -0.06221 | 0.225069 | 0.338448 |
| AQR         | 15q14             | 0.062205 | 0.225136 | 0.338514 |
| BCRP3       | 22q11.23          | 0.062202 | 0.225159 | 0.338514 |
| OR6C2       | 12q13.2           | 0.062202 | 0.225163 | 0.338514 |
| MINDY2      | 15q21.3-q22.1     | -0.06217 | 0.225364 | 0.33877  |
| SOCS4       | 14q22.3           | 0.062174 | 0.225368 | 0.33877  |
| DOK7        | 4p16.3            | 0.062158 | 0.225491 | 0.33893  |
| NIPSNAP1    | 22q12.2           | -0.06215 | 0.225554 | 0.339    |
| SIGLEC15    | 18q12.3           | -0.06214 | 0.22562  | 0.339074 |
| OTUD5       | Xp11.23           | -0.06214 | 0.225659 | 0.339107 |
| KYNU        | 2q22.2            | -0.06212 | 0.225777 | 0.339258 |
| MAGEB4      | Xp21.2            | -0.06211 | 0.225837 | 0.339323 |
| ST6GALNAC1  | 17q25.1           | 0.062103 | 0.225901 | 0.339393 |
| TNFSF15     | 9q32              | -0.0621  | 0.225931 | 0.339396 |
| GRAMD2A     | 15q23             | -0.0621  | 0.225944 | 0.339396 |
| FMO6P       | 1q24.3            | -0.0621  | 0.225954 | 0.339396 |
| YAE1        | 7p14.1            | -0.06209 | 0.226004 | 0.339446 |
| ART3        | 4q21.1 4p15.1-p14 | 0.062058 | 0.226241 | 0.339778 |
| FRG2        | 4q35.2            | 0.062036 | 0.226402 | 0.339994 |
| MIA2        | 14q13.2           | -0.06203 | 0.226466 | 0.340064 |

|          |                  |          |          |          |
|----------|------------------|----------|----------|----------|
| TAS2R46  | 12p13.2          | 0.062025 | 0.226487 | 0.340069 |
| ARHGAP9  | 12q13.3          | -0.06202 | 0.226507 | 0.340075 |
| COX7A2   | 6q14.1           | 0.061998 | 0.226687 | 0.340318 |
| KLC1     | 14q32.33         | -0.062   | 0.226703 | 0.340318 |
| IGDCC3   | 15q22.31         | -0.06198 | 0.22684  | 0.340498 |
| SRL      | 16p13.3          | -0.06197 | 0.226913 | 0.340582 |
| GTF2E2   | 8p12             | 0.061965 | 0.226934 | 0.340588 |
| HELT     | 4q35.1           | 0.061962 | 0.226957 | 0.340596 |
| P3H4     | 17q21.2          | -0.06195 | 0.227026 | 0.340657 |
| ZNF771   | 16p11.2          | 0.061952 | 0.227031 | 0.340657 |
| DNM3     | 1q24.3           | -0.06194 | 0.227091 | 0.340721 |
| CATIP    | 2q35             | -0.06194 | 0.227122 | 0.340742 |
| EIF2B2   | 14q24.3          | -0.06192 | 0.227301 | 0.34097  |
| REPIN1   | 7q36.1           | 0.061916 | 0.227308 | 0.34097  |
| FAM237A  | 2q33.3           | -0.06191 | 0.227348 | 0.341005 |
| METTL4   | 18p11.32         | 0.061905 | 0.22739  | 0.341016 |
| CREB3L4  | 1q21.3           | 0.061904 | 0.227397 | 0.341016 |
| NCOR1    | 17p12-p11.2      | 0.061903 | 0.227407 | 0.341016 |
| CCNG1    | 5q34             | -0.06188 | 0.227577 | 0.341246 |
| C4ORF19  | 4p14             | 0.061871 | 0.227643 | 0.34132  |
| PCBP1    | 2p13.3           | -0.06187 | 0.227667 | 0.341331 |
| ELL3     | 15q15.3          | 0.061859 | 0.227734 | 0.341405 |
| GPRC6A   | 6q22.1           | -0.06186 | 0.22776  | 0.341418 |
| BDKRB1   | 14q32.2          | -0.06183 | 0.227936 | 0.341656 |
| FCRL1    | 1q23.1           | -0.06183 | 0.227981 | 0.341698 |
| MAFG-DT  | 17q25.3          | 0.061813 | 0.228079 | 0.34182  |
| ZNF579   | 19q13.42         | 0.061797 | 0.228198 | 0.341972 |
| OR52B6   | 11p15.4          | 0.061771 | 0.228396 | 0.342223 |
| KCNH8    | 3p24.3           | 0.061771 | 0.228399 | 0.342223 |
| HPCA     | 1p35.1           | -0.06177 | 0.22842  | 0.342229 |
| MRPL20   | 1p36.33          | 0.061755 | 0.22852  | 0.342352 |
| TDP2     | 6p22.3           | -0.06173 | 0.228707 | 0.342606 |
| TMCO2    | 1p34.2           | 0.061717 | 0.228807 | 0.3427   |
| FAM27B   | 9q21.11          | 0.061716 | 0.228811 | 0.3427   |
| SALL4    | 20q13.2          | -0.06172 | 0.22882  | 0.3427   |
| ARHGEF5  | 7q35             | 0.061706 | 0.228889 | 0.342777 |
| PLGRKT   | 9p24.1           | -0.06169 | 0.229001 | 0.342908 |
| RPS23    | 5q14.2           | -0.06169 | 0.229011 | 0.342908 |
| HAPLN2   | 1q23.1           | 0.061686 | 0.229042 | 0.342929 |
| PAGE2    | Xp11.21          | 0.061673 | 0.229136 | 0.343044 |
| PIGT     | 20q13.12         | -0.06167 | 0.229161 | 0.343056 |
| ACE      | 17q23.3          | 0.061642 | 0.229369 | 0.343342 |
| ALDH3A2  | 17p11.2          | -0.06161 | 0.229643 | 0.343726 |
| SMCO1    | 3q29             | 0.061593 | 0.229747 | 0.343856 |
| DDX1     | 2p24.3           | -0.06159 | 0.229764 | 0.343856 |
| FOSB     | 19q13.32         | -0.06157 | 0.229933 | 0.344084 |
| CUL2     | 10p11.21         | 0.061565 | 0.229958 | 0.344095 |
| ULK4P3   | 15q13.2          | -0.06154 | 0.230157 | 0.344367 |
| IKBKB    | 8p11.21          | 0.061534 | 0.23019  | 0.34439  |
| ALG1L    | 3q21.2           | -0.06153 | 0.230245 | 0.344448 |
| IFI44L   | 1p31.1           | -0.0615  | 0.230423 | 0.344688 |
| KHDRBS3  | 8q24.23          | -0.0615  | 0.230443 | 0.344692 |
| TAAR8    | 6q23.2           | 0.061492 | 0.230513 | 0.34477  |
| COX6A1   | 12q24.31 12q24.2 | 0.061481 | 0.23059  | 0.344861 |
| PSKH1    | 16q22.1          | -0.06146 | 0.230719 | 0.345028 |
| RNF145   | 5q33.3           | 0.061459 | 0.230759 | 0.345061 |
| SNORD15B | 11q13.4          | 0.061449 | 0.230838 | 0.345154 |
| DYNLL1   | 12q24.31         | -0.06145 | 0.230865 | 0.345169 |

|           |                    |          |          |          |
|-----------|--------------------|----------|----------|----------|
| BLK       | 8p23.1             | -0.06144 | 0.230937 | 0.345251 |
| BOLL      | 2q33.1             | 0.06143  | 0.230984 | 0.345294 |
| CASKIN2   | 17q25.1            | -0.06143 | 0.231014 | 0.345308 |
| RPS11     | 19q13.33           | -0.06142 | 0.231027 | 0.345308 |
| TBC1D2    | 9q22.33            | 0.061413 | 0.231112 | 0.34541  |
| C2CD5     | 12p12.1            | 0.061406 | 0.231165 | 0.345462 |
| KIAA1147  | 7q34               | -0.0614  | 0.231227 | 0.345529 |
| POLR3D    | 8p21.3             | -0.06139 | 0.231316 | 0.345636 |
| GABRG3    | 15q12              | -0.06138 | 0.231336 | 0.34564  |
| CENPBD1P1 | 19q13.43           | 0.061368 | 0.23145  | 0.345785 |
| C15ORF32  | 15q26.1            | -0.06136 | 0.231539 | 0.345861 |
| OFD1      | Xp22.2             | 0.061356 | 0.231545 | 0.345861 |
| TEKT5     | 16p13.13           | -0.06135 | 0.231553 | 0.345861 |
| CHKB-DT   | 22q13.33           | -0.06135 | 0.231575 | 0.345869 |
| GSTM2     | 1p13.3             | -0.06135 | 0.231622 | 0.345907 |
| SMCO4     | 11q21              | -0.06134 | 0.231635 | 0.345907 |
| RP9P      | 7p14.3             | -0.06134 | 0.231701 | 0.345967 |
| LSM11     | 5q33.3             | 0.061334 | 0.231713 | 0.345967 |
| BIRC6     | 2p22.3             | 0.061332 | 0.231727 | 0.345967 |
| TSPYL6    | 2p16.2             | 0.061325 | 0.231781 | 0.346022 |
| MYO1E     | 15q22.2            | -0.06132 | 0.231809 | 0.346035 |
| ASMT      | Xp22.33 and Yp11.2 | -0.06132 | 0.231825 | 0.346035 |
| RPP30     | 10q23.31           | 0.061312 | 0.231877 | 0.346087 |
| SMG1P5    | 16p11.2            | 0.061302 | 0.231957 | 0.346181 |
| SNORA57   | 11q12.3            | 0.061296 | 0.232003 | 0.346215 |
| PCED1A    | 20p13              | 0.061294 | 0.232015 | 0.346215 |
| RPL35     | 9q33.3             | 0.061286 | 0.232075 | 0.346279 |
| IPO11     | 5q12.1             | 0.061284 | 0.232092 | 0.346279 |
| SLC25A3   | 12q23.1            | 0.061272 | 0.232182 | 0.346388 |
| CARD10    | 22q13.1            | 0.061269 | 0.232205 | 0.346397 |
| SNORA36A  | Xq28               | 0.061245 | 0.23239  | 0.346605 |
| ZFYVE19   | 15q15.1            | 0.061245 | 0.232391 | 0.346605 |
| FAM177B   | 1q41               | 0.061244 | 0.232397 | 0.346605 |
| FDFT1     | 8p23.1             | 0.061236 | 0.232462 | 0.34666  |
| NDRG1     | 8q24.22            | -0.06123 | 0.232468 | 0.34666  |
| TP53TG3B  | 16p11.2            | -0.06122 | 0.232563 | 0.346776 |
| PDCD6     | 5p15.33            | 0.061216 | 0.232613 | 0.346824 |
| PRORS1P   | 2p16.1             | 0.061194 | 0.232784 | 0.347052 |
| PFN1      | 17p13.2            | 0.061185 | 0.23285  | 0.34712  |
| C2CD2     | 21q22.3            | 0.061183 | 0.232863 | 0.34712  |
| SPATA2    | 20q13.13           | 0.061176 | 0.232919 | 0.347178 |
| IL12A     | 3q25.33            | -0.06116 | 0.233038 | 0.347306 |
| SEPTIN12  | 16p13.3            | -0.06116 | 0.23304  | 0.347306 |
| DNITIP2   | 1p22.1             | -0.06115 | 0.233101 | 0.34737  |
| EIF3F     | 11p15.4            | -0.06114 | 0.2332   | 0.347492 |
| KLHDC8A   | 1q32.1             | -0.06112 | 0.233377 | 0.34773  |
| OR5V1     | 6p22.1             | -0.06109 | 0.233554 | 0.347968 |
| DNAI1     | 9p13.3             | -0.06108 | 0.233623 | 0.348045 |
| ADA       | 20q13.12           | -0.06106 | 0.233825 | 0.34832  |
| C19ORF53  | 19p13.13           | -0.06104 | 0.233936 | 0.348459 |
| SERHL2    | 22q13.2            | 0.061032 | 0.234022 | 0.348562 |
| FGFBP1    | 4p15.32            | 0.061025 | 0.23408  | 0.348621 |
| GALNTL5   | 7q36.1             | -0.06102 | 0.234132 | 0.348674 |
| ALG6      | 1p31.3             | 0.061001 | 0.234258 | 0.348835 |
| RNF166    | 16q24.2-q24.3      | 0.06099  | 0.234342 | 0.348929 |
| STAT1     | 2q32.2             | -0.06099 | 0.234356 | 0.348929 |
| CCNB3     | Xp11.22            | 0.060945 | 0.234689 | 0.349387 |
| ALDH1L2   | 12q23.3            | -0.06094 | 0.234698 | 0.349387 |

|              |               |          |          |          |
|--------------|---------------|----------|----------|----------|
| ZNF544       | 19q13.43      | 0.060939 | 0.234735 | 0.349415 |
| SUOX         | 12q13.2       | -0.06093 | 0.234824 | 0.349519 |
| OR51B5       | 11p15.4       | -0.06093 | 0.234839 | 0.349519 |
| NHS          | Xp22.2-p22.13 | 0.060903 | 0.235017 | 0.349738 |
| FNDC7        | 1p13.3        | 0.060902 | 0.235021 | 0.349738 |
| CDA          | 1p36.12       | -0.0609  | 0.235055 | 0.349761 |
| EFCC1        | 3q21.3        | -0.06088 | 0.235201 | 0.349953 |
| SIPA1L1      | 14q24.2       | 0.060871 | 0.235259 | 0.350002 |
| CPB2         | 13q14.13      | -0.06087 | 0.235268 | 0.350002 |
| YWHAB        | 20q13.12      | -0.06087 | 0.235305 | 0.35003  |
| YLPM1        | 14q24.3       | 0.060842 | 0.235486 | 0.350273 |
| GCAT         | 22q13.1       | 0.060836 | 0.235534 | 0.350319 |
| TSPAN17      | 5q35.2        | -0.06082 | 0.235629 | 0.350433 |
| NR5A2        | 1q32.1        | -0.06082 | 0.235669 | 0.350467 |
| COQ8B        | 19q13.2       | 0.06078  | 0.235963 | 0.350859 |
| IL17RA       | 22q11.1       | 0.060779 | 0.235968 | 0.350859 |
| KLC4         | 6p21.1        | -0.06076 | 0.236127 | 0.351071 |
| GTPBP10      | 7q21.13       | 0.060732 | 0.236332 | 0.351349 |
| LMBR1L       | 12q13.12      | -0.06073 | 0.236362 | 0.351367 |
| MAP3K1       | 5q11.2        | 0.060721 | 0.236419 | 0.351425 |
| UQCRQ        | 5q31.1        | 0.060667 | 0.236835 | 0.352018 |
| ADPRHL1      | 13q34         | -0.06066 | 0.236868 | 0.352018 |
| SIAH2        | 3q25.1        | -0.06066 | 0.23687  | 0.352018 |
| TADA2B       | 4p16.1        | -0.06066 | 0.236917 | 0.352061 |
| VILL         | 3p22.2        | 0.060644 | 0.237012 | 0.352176 |
| HERC6        | 4q22.1        | -0.06064 | 0.237083 | 0.352257 |
| ORAI1        | 12q24.31      | 0.060602 | 0.237344 | 0.352596 |
| WDR44        | Xq24          | -0.0606  | 0.237347 | 0.352596 |
| SLC66A1      | 1p36.13       | 0.060592 | 0.237419 | 0.352677 |
| ALOX15       | 17p13.2       | -0.06059 | 0.237461 | 0.352713 |
| DDX20        | 1p13.2        | 0.060581 | 0.237507 | 0.352756 |
| FAM178B      | 2q11.2        | -0.06057 | 0.237581 | 0.352839 |
| IFNA5        | 9p21.3        | 0.060564 | 0.237638 | 0.352897 |
| EPB41L4A-AS1 | 5q22.1        | -0.06056 | 0.237674 | 0.352926 |
| PPP2R5B      | 11q13.1       | -0.06055 | 0.237721 | 0.352969 |
| PTPRK        | 6q22.33       | -0.06053 | 0.237925 | 0.353232 |
| CDC34        | 19p13.3       | -0.06053 | 0.237934 | 0.353232 |
| PLXNB2       | 22q13.33      | 0.060522 | 0.237965 | 0.353253 |
| SERINC5      | 5q14.1        | 0.060515 | 0.238019 | 0.353306 |
| EIF2AK1      | 7p22.1        | 0.060496 | 0.238166 | 0.353498 |
| NKIRAS2      | 17q21.2       | -0.06048 | 0.23825  | 0.353596 |
| PLEKHS1      | 10q25.3       | 0.060479 | 0.238293 | 0.353633 |
| PHACTR4      | 1p35.3        | 0.060477 | 0.23831  | 0.353633 |
| CFAP57       | 1p34.2        | 0.060472 | 0.23835  | 0.353648 |
| DYNLT1       | 6q25.3        | 0.060471 | 0.238355 | 0.353648 |
| KRTAP5-2     | 11p15.5       | 0.060464 | 0.238413 | 0.353707 |
| ZNHIT1       | 7q22.1        | -0.06046 | 0.238431 | 0.353707 |
| SPATA19      | 11q25         | 0.060453 | 0.238498 | 0.353782 |
| LNPK         | 2q31.1        | -0.06043 | 0.23865  | 0.353954 |
| CPSF3        | 2p25.1        | 0.060433 | 0.23865  | 0.353954 |
| GOLGA8F      | 15q13.1       | -0.06042 | 0.238723 | 0.354036 |
| RO60         | 1q31.2        | -0.06041 | 0.238796 | 0.354118 |
| APOBEC3B     | 22q13.1       | 0.060394 | 0.238955 | 0.354328 |
| FRRS1        | 1p21.2        | -0.06038 | 0.239028 | 0.35441  |
| SHPK         | 17p13.2       | 0.060374 | 0.239113 | 0.354509 |
| LMTK2        | 7q21.3        | 0.060363 | 0.239198 | 0.35461  |
| MYADML2      | 17q25.3       | -0.06035 | 0.239285 | 0.354713 |
| LINC00632    | Xq27.1        | -0.06034 | 0.239343 | 0.354753 |



|           |               |          |          |          |
|-----------|---------------|----------|----------|----------|
| ARL13A    | Xq22.1        | 0.060344 | 0.239348 | 0.354753 |
| CD274     | 9p24.1        | -0.06033 | 0.239451 | 0.35488  |
| OPTC      | 1q32.1        | 0.060328 | 0.239471 | 0.354882 |
| C1QBP     | 17p13.2       | 0.060324 | 0.239506 | 0.354908 |
| ESM1      | 5q11.2        | -0.06031 | 0.239593 | 0.355007 |
| CHCHD2    | 7p11.2        | 0.060311 | 0.239608 | 0.355007 |
| PTGR1     | 9q31.3        | -0.06031 | 0.239642 | 0.355031 |
| SIK2      | 11q23.1       | -0.06028 | 0.239822 | 0.355217 |
| CCS       | 11q13.2       | -0.06028 | 0.239823 | 0.355217 |
| LOC148696 | 1q32.2        | 0.060281 | 0.239838 | 0.355217 |
| CCR3      | 3p21.31       | -0.06028 | 0.239838 | 0.355217 |
| MMP26     | 11p15.4       | -0.06026 | 0.239975 | 0.355393 |
| COL13A1   | 10q22.1       | 0.060259 | 0.240008 | 0.355401 |
| CACNG6    | 19q13.42      | -0.06026 | 0.240016 | 0.355401 |
| PRSS50    | 3p21.31       | -0.06025 | 0.240076 | 0.355464 |
| OR1Q1     | 9q33.2        | 0.060244 | 0.240127 | 0.355513 |
| HEPH      | Xq12          | -0.06023 | 0.240219 | 0.355607 |
| LRRC37B   | 17q11.2       | 0.06023  | 0.240239 | 0.355607 |
| MTM1      | Xq28          | -0.06023 | 0.240244 | 0.355607 |
| GCC2      | 2q12.3        | -0.06022 | 0.240345 | 0.35571  |
| ATP1B4    | Xq24          | -0.06021 | 0.240361 | 0.35571  |
| TMEM184B  | 22q13.1       | -0.06021 | 0.24038  | 0.35571  |
| LINC00608 | 2q35          | 0.060209 | 0.240399 | 0.35571  |
| LINC00410 | 13q31.3       | 0.060209 | 0.240402 | 0.35571  |
| HNRNP2    | Xq22.1        | -0.0602  | 0.240458 | 0.355766 |
| DAZ1      | Yq11.223      | -0.06019 | 0.240556 | 0.355885 |
| ELOVL1    | 1p34.2        | -0.06018 | 0.240665 | 0.35602  |
| SLC25A45  | 11q13.1       | 0.06017  | 0.240707 | 0.356042 |
| DCTN1-AS1 | 2p13.1        | 0.060169 | 0.240715 | 0.356042 |
| ACY1      | 3p21.2        | 0.060151 | 0.240856 | 0.356223 |
| ZNF560    | 19p13.2       | -0.06015 | 0.240879 | 0.356231 |
| CMTR2     | 16q22.2       | -0.06012 | 0.241107 | 0.356542 |
| RWDD4     | 4q35.1        | -0.0601  | 0.241235 | 0.356706 |
| PDCD6IP   | 3p22.3        | -0.06009 | 0.241325 | 0.356804 |
| MBL1P     | 10q22.3       | -0.06009 | 0.241338 | 0.356804 |
| DCAF13    | 8q22.3        | -0.06009 | 0.241355 | 0.356804 |
| NR1I3     | 1q23.3        | 0.060068 | 0.241509 | 0.357005 |
| DQX1      | 2p13.1        | 0.060044 | 0.241695 | 0.357253 |
| TGDS      | 13q32.1       | -0.06001 | 0.241977 | 0.357627 |
| EFCAB5    | 17q11.2       | -0.06001 | 0.241983 | 0.357627 |
| LYPD3     | 19q13.31      | -0.05999 | 0.242084 | 0.357749 |
| MRI1      | 19p13.13      | 0.059979 | 0.242206 | 0.357899 |
| LCNL1     | 9q34.3        | 0.059977 | 0.242221 | 0.357899 |
| PKDCC     | 2p21          | -0.05997 | 0.242279 | 0.357958 |
| NOMO1     | 16p13.11      | 0.059962 | 0.242341 | 0.358024 |
| EGFL7     | 9q34.3        | -0.05995 | 0.242396 | 0.358078 |
| BIRC8     | 19q13.42      | -0.05994 | 0.24251  | 0.3582   |
| BBX       | 3q13.12       | -0.05994 | 0.242514 | 0.3582   |
| C20ORF203 | 20q11.21      | -0.05994 | 0.242552 | 0.358223 |
| ACP4      | 19q13.33      | 0.059933 | 0.242566 | 0.358223 |
| ANKRD30B  | 18p11.21      | 0.059927 | 0.242619 | 0.358275 |
| CACNG3    | 16p12.1       | -0.05992 | 0.242699 | 0.358356 |
| SLC36A2   | 5q33.1        | -0.05992 | 0.242709 | 0.358356 |
| UBTF      | 17q21.31      | -0.05991 | 0.242764 | 0.35841  |
| PPY       | 17q21.31      | -0.0599  | 0.2428   | 0.358436 |
| UBXN10    | 1p36.12       | 0.059889 | 0.242914 | 0.358561 |
| GPR107    | 9q34.11       | 0.059888 | 0.24292  | 0.358561 |
| ADD3      | 10q25.1-q25.2 | -0.05987 | 0.243083 | 0.358762 |

|          |              |          |          |          |
|----------|--------------|----------|----------|----------|
| KIAA1257 | 3q21.3       | -0.05987 | 0.243096 | 0.358762 |
| CLEC4F   | 2p13.3       | -0.05986 | 0.24311  | 0.358762 |
| GLTPD2   | 17p13.2      | -0.05986 | 0.243128 | 0.358763 |
| MS4A14   | 11q12.2      | -0.05985 | 0.24322  | 0.358872 |
| MAN1B1   | 9q34.3       | -0.05984 | 0.243269 | 0.358918 |
| PDZD3    | 11q23.3      | 0.059833 | 0.243358 | 0.359022 |
| UBR3     | 2q31.1       | -0.05982 | 0.243485 | 0.359179 |
| GTSF1L   | 20q13.12     | -0.05981 | 0.2435   | 0.359179 |
| CTNNA3   | 10q21.3      | -0.05981 | 0.24353  | 0.359197 |
| ZSCAN20  | 1p35.1       | 0.059804 | 0.243584 | 0.35925  |
| LIAS     | 4p14         | -0.05979 | 0.243696 | 0.359339 |
| ATPAF2   | 17p11.2      | -0.05979 | 0.243698 | 0.359339 |
| OLIG3    | 6q23.3       | -0.05979 | 0.243698 | 0.359339 |
| HINFP    | 11q23.3      | -0.05978 | 0.243762 | 0.359407 |
| CEACAM5  | 19q13.2      | -0.05978 | 0.243803 | 0.359441 |
| TMC6     | 17q25.3      | 0.059767 | 0.243876 | 0.359522 |
| DYNC1H1  | 14q32.31     | 0.059762 | 0.243917 | 0.359538 |
| DGKG     | 3q27.2-q27.3 | -0.05976 | 0.243923 | 0.359538 |
| C22ORF31 | 22q12.1      | -0.05976 | 0.243953 | 0.359556 |
| ZNF212   | 7q36.1       | -0.05975 | 0.243985 | 0.359577 |
| RBM34    | 1q42.3       | 0.059722 | 0.244234 | 0.359917 |
| ABL2     | 1q25.2       | 0.059715 | 0.24429  | 0.359973 |
| PRAMEF9  | 1p36.21      | -0.05971 | 0.244322 | 0.359993 |
| OR10T2   | 1q23.1       | -0.0597  | 0.244413 | 0.360102 |
| ZBTB25   | 14q23.3      | 0.059689 | 0.244493 | 0.360192 |
| ALDH1A2  | 15q21.3      | -0.05968 | 0.244552 | 0.360254 |
| MAGEC2   | Xq27.2       | -0.05968 | 0.244578 | 0.360266 |
| ARHGEF18 | 19p13.2      | 0.059674 | 0.244614 | 0.360291 |
| UBOX5    | 20p13        | -0.05967 | 0.244651 | 0.36032  |
| WDR74    | 11q12.3      | 0.059653 | 0.244779 | 0.360455 |
| EXTL3    | 8p21.1       | -0.05965 | 0.244779 | 0.360455 |
| RFX4     | 12q23.3      | 0.059648 | 0.244818 | 0.360486 |
| SPAG9    | 17q21.33     | -0.05964 | 0.244905 | 0.360588 |
| PWP1     | 12q23.3      | -0.05963 | 0.244948 | 0.360624 |
| BSX      | 11q24.1      | -0.05961 | 0.245084 | 0.360798 |
| TMEM82   | 1p36.21      | -0.05959 | 0.24525  | 0.361015 |
| SF3B5    | 6q24.2       | 0.059592 | 0.245267 | 0.361015 |
| ITPRIPL2 | 16p12.3      | -0.05957 | 0.245466 | 0.361279 |
| GNB2     | 7q22.1       | 0.059564 | 0.245483 | 0.361279 |
| TTC14    | 3q26.33      | 0.059545 | 0.245633 | 0.361467 |
| CARF     | 2q33.2       | -0.05954 | 0.245647 | 0.361467 |
| PNRC2    | 1p36.11      | -0.05954 | 0.245713 | 0.361539 |
| AJAP1    | 1p36.32      | -0.05952 | 0.245874 | 0.361749 |
| MMP20    | 11q22.2      | -0.05951 | 0.245941 | 0.36182  |
| DYM      | 18q21.1      | -0.0595  | 0.245968 | 0.361834 |
| POLR3F   | 20p11.23     | -0.0595  | 0.246016 | 0.361878 |
| ARID3A   | 19p13.3      | -0.05949 | 0.246042 | 0.361889 |
| SLC25A40 | 7q21.12      | 0.059485 | 0.246116 | 0.361961 |
| CHRNA7   | 15q13.3      | 0.059483 | 0.246127 | 0.361961 |
| GALK1    | 17q25.1      | -0.05948 | 0.246193 | 0.362031 |
| KRT13    | 17q21.2      | -0.05947 | 0.246213 | 0.362035 |
| IL11RA   | 9p13.3       | 0.059433 | 0.246527 | 0.362469 |
| RNASE13  | 14q11.2      | 0.059427 | 0.246576 | 0.362515 |
| LMO1     | 11p15.4      | -0.0594  | 0.24679  | 0.362803 |
| MRPL22   | 5q33.2       | 0.059396 | 0.246823 | 0.362824 |
| TMEM126B | 11q14.1      | -0.05939 | 0.246854 | 0.362844 |
| CHIAP2   | 1p13.2       | 0.059383 | 0.246922 | 0.362917 |
| OR2L8    | 1q44         | -0.05936 | 0.247092 | 0.363141 |

|            |                 |          |          |          |
|------------|-----------------|----------|----------|----------|
| TAPT1-AS1  | 4p15.32         | -0.05935 | 0.247151 | 0.363201 |
| ESRRB      | 14q24.3         | -0.05933 | 0.247351 | 0.363445 |
| PCLO       | 7q21.11         | -0.05933 | 0.247364 | 0.363445 |
| KLK7       | 19q13.41        | -0.05933 | 0.247372 | 0.363445 |
| LRRC31     | 3q26.2          | -0.05932 | 0.247407 | 0.36347  |
| ADAMTS7    | 15q25.1         | -0.05932 | 0.247444 | 0.363473 |
| SOX3       | Xq27.1          | -0.05932 | 0.247445 | 0.363473 |
| PRRC1      | 5q23.2          | -0.05931 | 0.247547 | 0.363595 |
| CLEC3A     | 16q23.1         | -0.0593  | 0.247598 | 0.363644 |
| SMTNL1     | 11q12.1         | 0.059296 | 0.247624 | 0.363655 |
| ZPLD1      | 3q12.3          | -0.05929 | 0.247673 | 0.363701 |
| PC         | 11q13.2         | 0.059237 | 0.248095 | 0.364289 |
| OR6C65     | 12q13.2         | 0.059235 | 0.24811  | 0.364289 |
| OLFM4      | 13q14.3         | -0.05923 | 0.248164 | 0.364342 |
| RPL35A     | 3q29            | -0.05922 | 0.248242 | 0.364429 |
| DHRS4L2    | 14q11.2         | -0.05921 | 0.248333 | 0.364536 |
| TERC       | 3q26.2          | 0.05919  | 0.248466 | 0.364705 |
| ARHGEF7    | 13q34           | 0.059167 | 0.248649 | 0.364934 |
| KCNS3      | 2p24.2          | -0.05917 | 0.248659 | 0.364934 |
| CNOT4      | 7q33            | -0.05916 | 0.248716 | 0.364991 |
| ADAM2      | 8p11.22         | -0.05914 | 0.248879 | 0.365203 |
| UQCRFS1    | 19q12           | 0.059128 | 0.248963 | 0.3653   |
| GPR6       | 6q21            | 0.059122 | 0.249012 | 0.365345 |
| ZNF708     | 19p12           | -0.05912 | 0.249066 | 0.365398 |
| CCDC171    | 9p22.3          | -0.05911 | 0.249099 | 0.365408 |
| SMURF1     | 7q22.1          | -0.05911 | 0.249109 | 0.365408 |
| TRIM46     | 1q22            | -0.05911 | 0.249141 | 0.365428 |
| ZNF202     | 11q24.1         | 0.059102 | 0.24917  | 0.36544  |
| KCNJ3      | 2q24.1          | -0.0591  | 0.249186 | 0.36544  |
| PYGL       | 14q22.1         | 0.059074 | 0.249398 | 0.365724 |
| MAGEB3     | Xp21.2          | 0.05907  | 0.249434 | 0.36575  |
| EXOC1L     | 4q12            | 0.059058 | 0.249528 | 0.365861 |
| LYPLA2     | 1p36.11         | 0.059055 | 0.249547 | 0.365861 |
| C3ORF36    | 3q22.1          | -0.05905 | 0.249592 | 0.365902 |
| ITPRID1    | 7p14.3          | 0.059045 | 0.249633 | 0.365935 |
| SEPTIN1    | 16p11.2         | -0.05903 | 0.249719 | 0.366035 |
| FRS3       | 6p21.1          | 0.059026 | 0.24978  | 0.366097 |
| SLC22A6    | 11q12.3         | -0.059   | 0.249965 | 0.366341 |
| ADCY3      | 2p23.3          | 0.059001 | 0.249988 | 0.366347 |
| SNX29      | 16p13.13-p13.12 | -0.05899 | 0.250097 | 0.36648  |
| GRAMD1B    | 11q24.1         | 0.058971 | 0.250228 | 0.366646 |
| JSRP1      | 19p13.3         | -0.05896 | 0.250324 | 0.366759 |
| R3HDML     | 20q13.12        | 0.058942 | 0.250458 | 0.36693  |
| JUN        | 1p32.1          | -0.05893 | 0.25054  | 0.367023 |
| SNRPD2     | 19q13.32        | 0.05892  | 0.250639 | 0.367125 |
| ATP6V0C    | 16p13.3         | 0.058917 | 0.250658 | 0.367125 |
| BANK1      | 4q24            | -0.05892 | 0.250665 | 0.367125 |
| LCE3E      | 1q21.3          | -0.05891 | 0.250733 | 0.367198 |
| GPR45      | 2q12.1          | 0.058901 | 0.250789 | 0.36725  |
| RSBN1L     | 7q11.23         | -0.0589  | 0.250806 | 0.36725  |
| MRPL3      | 3q22.1          | 0.058888 | 0.250892 | 0.367351 |
| POM121L8P  | 22q11.21        | -0.05888 | 0.250937 | 0.367373 |
| ANKRD30BP2 | 21q11.2         | -0.05888 | 0.250944 | 0.367373 |
| ZNF524     | 19q13.42        | 0.058856 | 0.251151 | 0.367649 |
| MTAP       | 9p21.3          | 0.058852 | 0.251186 | 0.367656 |
| IPO5       | 13q32.2         | 0.058851 | 0.251193 | 0.367656 |
| ATP6V1E2   | 2p21 2p16-p12   | -0.05881 | 0.251488 | 0.368061 |
| MPP5       | 14q23.3         | -0.05878 | 0.251775 | 0.368454 |

|                 |          |          |          |          |
|-----------------|----------|----------|----------|----------|
| ANKHD1-EIF4EBP3 | 5q31.3   | 0.058774 | 0.251812 | 0.368481 |
| NEURL2          | 20q13.12 | -0.05877 | 0.251874 | 0.368546 |
| MTSS2           | 16q22.1  | 0.058756 | 0.251963 | 0.368649 |
| TRMT1L          | 1q25.3   | -0.05874 | 0.252055 | 0.368757 |
| SLC7A13         | 8q21.3   | 0.058739 | 0.252094 | 0.368787 |
| TALDO1          | 11p15.5  | 0.058714 | 0.252301 | 0.369062 |
| SIGLEC16        | 19q13.33 | 0.058707 | 0.252355 | 0.369114 |
| PTGDR           | 14q22.1  | -0.05869 | 0.252458 | 0.369226 |
| PCGEM1          | 2q32.3   | -0.05869 | 0.252468 | 0.369226 |
| TSSC2           | 11p15.4  | -0.05867 | 0.25265  | 0.369465 |
| LINC01257       | 12q24.33 | -0.05867 | 0.252678 | 0.369478 |
| PTPN4           | 2q14.2   | -0.05864 | 0.252871 | 0.369734 |
| AKAP7           | 6q23.2   | -0.05863 | 0.253007 | 0.369902 |
| EIF5A2          | 3q26.2   | -0.05862 | 0.253023 | 0.369902 |
| GCLC            | 6p12.1   | -0.05862 | 0.253051 | 0.369916 |
| CSTL1           | 20p11.21 | 0.058614 | 0.253109 | 0.369931 |
| LIN7A           | 12q21.31 | -0.05861 | 0.253135 | 0.369931 |
| VCX3A           | Xp22.31  | 0.058611 | 0.253138 | 0.369931 |
| MAPK12          | 22q13.33 | 0.058609 | 0.253152 | 0.369931 |
| PIK3AP1         | 10q24.1  | 0.058607 | 0.253164 | 0.369931 |
| MT1H            | 16q13    | -0.05861 | 0.253172 | 0.369931 |
| FTSJ3           | 17q23.3  | 0.058603 | 0.253196 | 0.369939 |
| SESN2           | 1p35.3   | -0.0586  | 0.25326  | 0.370006 |
| RASGEF1A        | 10q11.21 | -0.05859 | 0.253323 | 0.370071 |
| ARPIN           | 15q26.1  | -0.05858 | 0.253376 | 0.370121 |
| XPA             | 9q22.33  | -0.05855 | 0.253629 | 0.370464 |
| CRISP1          | 6p12.3   | 0.058539 | 0.253718 | 0.370566 |
| UNC5CL          | 6p21.1   | 0.058529 | 0.253797 | 0.370655 |
| TPPP            | 5p15.33  | 0.058525 | 0.253835 | 0.370684 |
| PXT1            | 6p21.31  | 0.058518 | 0.253886 | 0.370731 |
| GHITM           | 10q23.1  | 0.058515 | 0.253911 | 0.37074  |
| ROCK2           | 2p25.1   | -0.05849 | 0.254105 | 0.370997 |
| ZSCAN30         | 18q12.2  | -0.05848 | 0.254222 | 0.371141 |
| CDK20           | 9q22.1   | 0.058464 | 0.254331 | 0.371272 |
| ACOT9           | Xp22.11  | -0.05845 | 0.25442  | 0.371376 |
| ALOX12          | 17p13.1  | 0.05845  | 0.254445 | 0.371385 |
| VENTXP1         | Xp21.3   | 0.058439 | 0.254532 | 0.371485 |
| TGIF2           | 20q11.23 | -0.05843 | 0.254638 | 0.371612 |
| PNLIP           | 10q25.3  | 0.058422 | 0.254672 | 0.371629 |
| UBD             | 6p22.1   | -0.05842 | 0.254687 | 0.371629 |
| NGDN            | 14q11.2  | -0.05841 | 0.254801 | 0.371768 |
| STAT2           | 12q13.3  | -0.05839 | 0.254929 | 0.371928 |
| SLC7A2          | 8p22     | -0.05839 | 0.254959 | 0.371945 |
| RAD21           | 8q24.11  | 0.058381 | 0.255008 | 0.371989 |
| CNFN            | 19q13.2  | 0.058368 | 0.255113 | 0.372116 |
| STPG1           | 1p36.11  | 0.058358 | 0.255194 | 0.372206 |
| NBPF14          | 1q21.2   | 0.058338 | 0.255357 | 0.372418 |
| KCNJ1           | 11q24.3  | -0.05831 | 0.25561  | 0.372738 |
| IFNA7           | 9p21.3   | 0.058306 | 0.25562  | 0.372738 |
| CEP95           | 17q23.3  | 0.058304 | 0.255633 | 0.372738 |
| LOC728989       | 1q21.1   | 0.058302 | 0.255651 | 0.372738 |
| ARSF            | Xp22.33  | -0.05829 | 0.255724 | 0.372817 |
| ASRGL1          | 11q12.3  | 0.058286 | 0.255779 | 0.37287  |
| FCAR            | 19q13.42 | -0.05825 | 0.256053 | 0.373242 |
| MRPL32          | 7p14.1   | 0.05824  | 0.256159 | 0.37337  |
| TEX36           | 10q26.13 | -0.05822 | 0.256317 | 0.373573 |
| KLHL22          | 22q11.21 | -0.05822 | 0.256346 | 0.373587 |
| RAET1L          | 6q25.1   | -0.05819 | 0.256569 | 0.373885 |

|           |          |          |          |          |
|-----------|----------|----------|----------|----------|
| KLK1      | 19q13.33 | 0.058186 | 0.256594 | 0.373895 |
| ZNF862    | 7q36.1   | 0.058175 | 0.256688 | 0.374004 |
| COPS6     | 7q22.1   | -0.05817 | 0.256711 | 0.37401  |
| RNF213    | 17q25.3  | 0.05817  | 0.256731 | 0.374012 |
| GGTLC2    | 22q11.22 | -0.05817 | 0.256765 | 0.374035 |
| ADGRE3    | 19p13.12 | -0.05815 | 0.256929 | 0.374246 |
| NCR2      | 6p21.1   | -0.05812 | 0.25717  | 0.374571 |
| OR10H1    | 19p13.12 | 0.058109 | 0.257233 | 0.374623 |
| RAE1      | 20q13.31 | -0.05811 | 0.257243 | 0.374623 |
| OR56A5    | 11p15.4  | 0.058089 | 0.257394 | 0.374816 |
| POM121L2  | 6p22.1   | -0.05806 | 0.257655 | 0.375156 |
| POP5      | 12q24.31 | 0.058056 | 0.257666 | 0.375156 |
| MED1      | 17q12    | 0.058047 | 0.257742 | 0.375239 |
| ZFAND1    | 8q21.13  | -0.05804 | 0.25777  | 0.375253 |
| OR52K1    | 11p15.4  | -0.05803 | 0.257875 | 0.375379 |
| GP6       | 19q13.42 | 0.058011 | 0.258036 | 0.375585 |
| TENT5A    | 6q14.1   | -0.058   | 0.258085 | 0.37563  |
| ERCC4     | 16p13.12 | -0.058   | 0.258145 | 0.37569  |
| NCOA3     | 20q13.12 | -0.05797 | 0.25835  | 0.375962 |
| PRDM16    | 1p36.32  | -0.05796 | 0.258437 | 0.376061 |
| TTC7A     | 2p21     | 0.05795  | 0.258536 | 0.376178 |
| TMEM236   | 10p12.33 | -0.05794 | 0.258609 | 0.376241 |
| HAR1B     | 20q13.33 | 0.05794  | 0.258617 | 0.376241 |
| RDH12     | 14q24.1  | -0.05793 | 0.258717 | 0.376359 |
| VCPKMT    | 14q21.3  | 0.057914 | 0.258832 | 0.376499 |
| TEX15     | 8p12     | -0.0579  | 0.258927 | 0.376609 |
| LARP1B    | 4q28.2   | 0.057897 | 0.258974 | 0.376651 |
| SARM1     | 17q11.2  | -0.05789 | 0.25904  | 0.376697 |
| POM121L1P | 22q11.22 | 0.057888 | 0.259044 | 0.376697 |
| AKR1D1    | 7q33     | -0.05788 | 0.259124 | 0.376768 |
| MTRF1L    | 6q25.2   | -0.05788 | 0.25913  | 0.376768 |
| SMAD5-AS1 | 5q31.1   | -0.05787 | 0.259222 | 0.376874 |
| SLC16A9   | 10q21.2  | -0.05786 | 0.259285 | 0.376938 |
| SYCP3     | 12q23.2  | 0.057834 | 0.259489 | 0.377208 |
| CT47A6    | Xq24     | -0.05779 | 0.259816 | 0.377656 |
| PRSS54    | 16q21    | 0.05777  | 0.260021 | 0.377926 |
| CIAO2A    | 15q22.31 | -0.05776 | 0.260074 | 0.377975 |
| ELP6      | 3p21.31  | -0.05776 | 0.260108 | 0.377997 |
| RALGAPA2  | 20p11.23 | 0.057743 | 0.260243 | 0.378166 |
| GNRHR2    | 1q21.1   | 0.057736 | 0.260298 | 0.378219 |
| MTO1      | 6q13     | 0.057686 | 0.260713 | 0.378795 |
| CAPN11    | 6p21.1   | -0.05767 | 0.260856 | 0.378975 |
| SCAMP2    | 15q24.1  | 0.057645 | 0.261057 | 0.37922  |
| HUS1B     | 6p25.3   | 0.057644 | 0.261065 | 0.37922  |
| CTXN3     | 5q23.2   | -0.05764 | 0.261082 | 0.37922  |
| RPL22L1   | 3q26.2   | -0.05763 | 0.261164 | 0.379312 |
| HCG22     | 6p21.33  | -0.05763 | 0.261203 | 0.379332 |
| IL5       | 5q31.1   | 0.057625 | 0.261216 | 0.379332 |
| LIMA1     | 12q13.12 | 0.057609 | 0.261355 | 0.379507 |
| DNTT      | 10q24.1  | -0.05759 | 0.261526 | 0.379714 |
| MED23     | 6q23.2   | -0.05759 | 0.261536 | 0.379714 |
| UBL4A     | Xq28     | 0.057562 | 0.261745 | 0.37999  |
| FASTKD3   | 5p15.31  | 0.057521 | 0.262081 | 0.38045  |
| TMEM257   | Xq27.3   | -0.05743 | 0.262807 | 0.381476 |
| NDUFV3    | 21q22.3  | 0.057429 | 0.262851 | 0.381513 |
| SNORA14B  | 1q42.3   | 0.057426 | 0.262875 | 0.38152  |
| SH2D4B    | 10q23.1  | 0.057421 | 0.26291  | 0.381544 |
| HAT1      | 2q31.1   | 0.057417 | 0.262946 | 0.381548 |

|             |                |          |          |          |
|-------------|----------------|----------|----------|----------|
| FBRS        | 16p11.2        | 0.057417 | 0.262951 | 0.381548 |
| SLC2A6      | 9q34.2         | -0.0574  | 0.263086 | 0.381698 |
| PYROXD2     | 10q24.2        | -0.0574  | 0.263093 | 0.381698 |
| ABCC2       | 10q24.2        | -0.05739 | 0.263154 | 0.381759 |
| MRPL58      | 17q25.1        | 0.057388 | 0.263186 | 0.381778 |
| OR10K2      | 1q23.1         | -0.05738 | 0.263286 | 0.381895 |
| FFAR2       | 19q13.12       | 0.057373 | 0.263317 | 0.381912 |
| TRPM2       | 21q22.3        | -0.05737 | 0.263364 | 0.381953 |
| SLX4IP      | 20p12.2        | 0.057359 | 0.263432 | 0.382005 |
| TSSK6       | 19p13.11       | 0.057358 | 0.263438 | 0.382005 |
| RGSL1       | 1q25.3         | 0.057351 | 0.263494 | 0.382059 |
| TTY7        | Yp11.2         | -0.05734 | 0.263608 | 0.382196 |
| SLCO1B3     | 12p12.2        | -0.05734 | 0.263627 | 0.382197 |
| KRTAP1-5    | 17q21.2        | -0.05733 | 0.263704 | 0.38228  |
| GPR62       | 3p21.2         | 0.057298 | 0.263938 | 0.382585 |
| FAM122C     | Xq26.3         | -0.0573  | 0.263953 | 0.382585 |
| C2CD4C      | 19p13.3        | -0.05729 | 0.263982 | 0.3826   |
| NOSIP       | 19q13.33       | -0.05728 | 0.264052 | 0.382673 |
| FEV         | 2q35           | -0.05726 | 0.264271 | 0.38296  |
| ZNRD2       | 11q13.1        | 0.057256 | 0.264288 | 0.38296  |
| LOC728024   | 8p11.23        | -0.05723 | 0.264543 | 0.383302 |
| ROPN1L      | 5p15.2         | -0.05722 | 0.264612 | 0.383374 |
| SMIM32      | 5q31.1         | 0.057201 | 0.264755 | 0.383554 |
| PRR23B      | 3q23           | -0.05718 | 0.264885 | 0.383715 |
| BCL9        | 1q21.2         | 0.057178 | 0.26494  | 0.383766 |
| ZNF99       | 19p12          | -0.05717 | 0.264989 | 0.38381  |
| HECA        | 6q24.1         | -0.05716 | 0.265052 | 0.383874 |
| C1ORF185    | 1p32.3         | 0.057151 | 0.265167 | 0.384006 |
| COL6A4P2    | 3q22.1         | 0.057149 | 0.265182 | 0.384006 |
| EPHB4       | 7q22.1         | 0.057147 | 0.265204 | 0.38401  |
| ANKRD37     | 4q35.1         | 0.057122 | 0.265415 | 0.384287 |
| SNORD116-28 | 15q11.2        | -0.05712 | 0.265463 | 0.384329 |
| ACSM3       | 16p12.3        | -0.05711 | 0.265493 | 0.384344 |
| STK40       | 1p34.3         | 0.057099 | 0.265603 | 0.384476 |
| SPEM2       | 17p13.1        | 0.057087 | 0.265704 | 0.384595 |
| THSD1P1     | 13q14.3        | 0.057081 | 0.26576  | 0.384628 |
| IQCB1       | 3q13.33 3q21.1 | 0.05708  | 0.265765 | 0.384628 |
| RRBP1       | 20p12.1        | 0.057077 | 0.26579  | 0.384635 |
| CCDC197     | 14q32.12       | 0.057074 | 0.265811 | 0.384635 |
| CYP26C1     | 10q23.33       | -0.05707 | 0.265828 | 0.384635 |
| KCTD17      | 22q12.3        | -0.05706 | 0.265966 | 0.384807 |
| RGS3        | 9q32           | -0.05704 | 0.266083 | 0.384949 |
| OR5B12      | 11q12.1        | 0.057006 | 0.266387 | 0.385361 |
| APEX1       | 14q11.2        | -0.05699 | 0.266517 | 0.385521 |
| PBDC1       | Xq13.3         | -0.05695 | 0.266879 | 0.386017 |
| CLDN25      | 11q23.2        | 0.056942 | 0.266927 | 0.386059 |
| PSMF1       | 20p13          | -0.05694 | 0.266962 | 0.386069 |
| TMEM161B    | 5q14.3         | 0.056936 | 0.266973 | 0.386069 |
| DMAC2       | 19q13.2        | -0.05693 | 0.267062 | 0.386157 |
| HSD3B1      | 1p12           | -0.05692 | 0.267073 | 0.386157 |
| ATG9B       | 7q36.1         | 0.056917 | 0.267136 | 0.386207 |
| NDUFA6      | 22q13.2        | -0.05692 | 0.267145 | 0.386207 |
| ANKRD10     | 13q34          | 0.056911 | 0.267182 | 0.386231 |
| CT45A6      | Xq26.3         | -0.05691 | 0.267205 | 0.386237 |
| MRGPRX3     | 11p15.1        | -0.05688 | 0.267431 | 0.386536 |
| ZNF211      | 19q13.43       | -0.05687 | 0.267506 | 0.386617 |
| TRAPPC6A    | 19q13.32       | -0.05687 | 0.267546 | 0.386646 |
| NR1H4       | 12q23.1        | -0.05687 | 0.267567 | 0.386649 |

|              |            |          |          |          |
|--------------|------------|----------|----------|----------|
| IL33         | 9p24.1     | 0.056848 | 0.267718 | 0.38684  |
| FAM106C      | 17p11.2    | 0.056843 | 0.26776  | 0.386872 |
| DMRTA2       | 1p32.3     | 0.056819 | 0.267957 | 0.387129 |
| SIRPD        | 20p13      | -0.05678 | 0.268248 | 0.38752  |
| LRRC10       | 12q15      | 0.056774 | 0.268336 | 0.38762  |
| TMOD3        | 15q21.2    | 0.056769 | 0.268385 | 0.387663 |
| CDK12        | 17q12      | 0.056762 | 0.268438 | 0.387711 |
| CRK          | 17p13.3    | -0.05676 | 0.268458 | 0.387712 |
| MS4A15       | 11q12.2    | 0.056744 | 0.26859  | 0.387874 |
| KDM4E        | 11q21      | -0.05674 | 0.268624 | 0.387897 |
| CEP97        | 3q12.3     | 0.056736 | 0.268658 | 0.387917 |
| SOAT1        | 1q25.2     | -0.05671 | 0.268858 | 0.388178 |
| ZNF214       | 11p15.4    | -0.05671 | 0.268878 | 0.388179 |
| ZNF733P      | 7q11.21    | -0.0567  | 0.268955 | 0.388263 |
| SULT1C2      | 2q12.3     | 0.056699 | 0.268976 | 0.388265 |
| NAPB         | 20p11.21   | 0.056689 | 0.269058 | 0.388355 |
| MICOS13      | 19p13.3    | 0.056669 | 0.269228 | 0.388572 |
| INE2         | Xp22.2     | 0.056662 | 0.269284 | 0.388625 |
| ZSCAN5A      | 19q13.43   | 0.05665  | 0.26939  | 0.38875  |
| CD209        | 19p13.2    | -0.05664 | 0.269487 | 0.388861 |
| GSTP1        | 11q13.2    | 0.056629 | 0.269563 | 0.388918 |
| COL4A5       | Xq22.3     | -0.05663 | 0.269565 | 0.388918 |
| C2ORF81      | 2p13.1     | -0.05662 | 0.269652 | 0.389017 |
| MAIP1        | 2q33.1     | -0.05661 | 0.269735 | 0.389107 |
| SERPINB11    | 18q21.33   | -0.0566  | 0.269771 | 0.389132 |
| VWA5B2       | 3q27.1     | 0.056599 | 0.269823 | 0.389178 |
| SNRPB        | 20p13      | 0.056589 | 0.269906 | 0.389253 |
| IMPDH2       | 3p21.31    | 0.056588 | 0.269913 | 0.389253 |
| PAN3         | 13q12.2    | 0.056585 | 0.269939 | 0.389262 |
| LYG2         | 2q11.2     | 0.056577 | 0.270009 | 0.389335 |
| COPG2        | 7q32.2     | -0.05657 | 0.270041 | 0.389353 |
| C15ORF62     | 15q15.1    | 0.056551 | 0.270226 | 0.389591 |
| GCKR         | 2p23.3     | -0.05655 | 0.270275 | 0.389632 |
| NDUFA8       | 9q33.2     | 0.056543 | 0.270293 | 0.389632 |
| C19ORF44     | 19p13.11   | 0.056538 | 0.270339 | 0.38967  |
| PTMA         | 2q37.1     | 0.056523 | 0.270463 | 0.389821 |
| TACR2        | 10q22.1    | -0.0565  | 0.270686 | 0.390114 |
| ARFGAP1      | 20q13.33   | 0.056461 | 0.270993 | 0.390529 |
| LINC00112    | 21q22.3    | 0.056445 | 0.271125 | 0.390691 |
| CFAP70       | 10q22.2    | -0.05644 | 0.271193 | 0.39076  |
| KRTAP4-4     | 17q21.2    | 0.056435 | 0.271212 | 0.39076  |
| CIART        | 1q21.2     | 0.056418 | 0.27136  | 0.390944 |
| ZSCAN12      | 6p22.1     | -0.0564  | 0.271508 | 0.391029 |
| GRAMD1A      | 19q13.11   | 0.0564   | 0.271514 | 0.391029 |
| SMAGP        | 12q13.13   | -0.0564  | 0.271519 | 0.391029 |
| STRN         | 2p22.2     | 0.056397 | 0.271532 | 0.391029 |
| DYNLL2       | 17q22      | -0.0564  | 0.271534 | 0.391029 |
| CCDC110      | 4q35.1     | -0.0564  | 0.271535 | 0.391029 |
| SERPINI2     | 3q26.1     | -0.05637 | 0.27177  | 0.391339 |
| NXPE4        | 11q23.2    | -0.05637 | 0.271792 | 0.391341 |
| SNX8         | 7p22.3     | 0.056365 | 0.27181  | 0.391341 |
| TRIB1        | 8q24.13    | -0.05636 | 0.271889 | 0.391426 |
| SH3KBP1      | Xp22.12    | -0.05635 | 0.271955 | 0.391493 |
| SLC25A41     | 19p13.3    | 0.056345 | 0.271982 | 0.391503 |
| ATP6V0E2-AS1 | 7q36.1     | 0.056333 | 0.272078 | 0.391614 |
| ATL3         | 11q13.1    | -0.05632 | 0.27219  | 0.391747 |
| PDS5B        | 13q13.1    | 0.056314 | 0.272247 | 0.3918   |
| HMBOX1       | 8p21.1-p12 | 0.056291 | 0.272435 | 0.392043 |

|            |          |          |          |          |
|------------|----------|----------|----------|----------|
| VPS29      | 12q24.11 | 0.056284 | 0.272497 | 0.392103 |
| TNPO1      | 5q13.2   | -0.05628 | 0.27257  | 0.392181 |
| STEAP2     | 7q21.13  | -0.05627 | 0.272646 | 0.392256 |
| KRT4       | 12q13.13 | -0.05626 | 0.272681 | 0.392256 |
| MBD3L5     | 19p13.2  | 0.056263 | 0.272681 | 0.392256 |
| MUC7       | 4q13.3   | -0.05625 | 0.272747 | 0.392323 |
| RFPL1      | 22q12.2  | 0.056232 | 0.272943 | 0.392575 |
| PSG3       | 19q13.2  | -0.05623 | 0.272962 | 0.392575 |
| MLF2       | 12p13.31 | 0.056225 | 0.273001 | 0.392602 |
| RAX2       | 19p13.3  | 0.056217 | 0.273075 | 0.392681 |
| BRWD3      | Xq21.1   | 0.05621  | 0.273131 | 0.392734 |
| ADCY9      | 16p13.3  | 0.056194 | 0.273271 | 0.392907 |
| LINC00588  | 8q12.1   | 0.056181 | 0.273379 | 0.393022 |
| IQCJ       | 3q25.32  | -0.05618 | 0.27339  | 0.393022 |
| RAB35      | 12q24.23 | 0.056173 | 0.273444 | 0.393067 |
| ANAPC10    | 4q31.21  | -0.05617 | 0.273468 | 0.393067 |
| FAM209A    | 20q13.31 | 0.056169 | 0.273481 | 0.393067 |
| NAE1       | 16q22.1  | 0.056158 | 0.273575 | 0.393146 |
| REP15      | 12p11.22 | -0.05616 | 0.273575 | 0.393146 |
| PAX9       | 14q13.3  | 0.056151 | 0.273638 | 0.393195 |
| ALDH4A1    | 1p36.13  | 0.056149 | 0.273648 | 0.393195 |
| NUTF2      | 16q22.1  | 0.056133 | 0.273792 | 0.393374 |
| UTS2       | 1p36.23  | 0.056129 | 0.273821 | 0.39338  |
| TAT        | 16q22.2  | -0.05613 | 0.273845 | 0.39338  |
| CLEC4D     | 12p13.31 | -0.05613 | 0.273856 | 0.39338  |
| LINC00271  | 6q23.3   | -0.05612 | 0.273927 | 0.393455 |
| CFAP53     | 18q21.1  | -0.0561  | 0.274046 | 0.393598 |
| IRGM       | 5q33.1   | -0.05609 | 0.274125 | 0.393683 |
| BAD        | 11q13.1  | -0.05608 | 0.274202 | 0.393764 |
| HEBP2      | 6q24.1   | -0.05601 | 0.274842 | 0.394652 |
| SLCO6A1    | 5q21.1   | -0.05601 | 0.274859 | 0.394652 |
| TDRKH      | 1q21.3   | 0.056004 | 0.274898 | 0.394679 |
| XKR6       | 8p23.1   | 0.055996 | 0.274966 | 0.394748 |
| SLC6A14    | Xq23     | 0.055971 | 0.275182 | 0.395031 |
| DBR1       | 3q22.3   | -0.05596 | 0.275239 | 0.395084 |
| AKR1B15    | 7q33     | 0.055925 | 0.275576 | 0.39554  |
| LOC90246   | 3q21.3   | 0.055918 | 0.275634 | 0.395595 |
| CRLF3      | 17q11.2  | -0.0559  | 0.275749 | 0.39573  |
| TSPAN3     | 15q24.3  | 0.055889 | 0.275887 | 0.395901 |
| PARP14     | 3q21.1   | 0.055875 | 0.276001 | 0.396035 |
| PHKB       | 16q12.1  | -0.05586 | 0.276127 | 0.396183 |
| XRCC6      | 22q13.2  | -0.05586 | 0.276143 | 0.396183 |
| ADAM29     | 4q34.1   | -0.05583 | 0.276356 | 0.396459 |
| PAXIP1-AS1 | 7q36.2   | 0.05583  | 0.276391 | 0.396459 |
| ASAH2      | 10q11.23 | 0.055829 | 0.276397 | 0.396459 |
| RNF220     | 1p34.1   | 0.055827 | 0.276418 | 0.396459 |
| ABT1       | 6p22.2   | 0.055825 | 0.276434 | 0.396459 |
| PLA2G4F    | 15q15.1  | 0.055805 | 0.276605 | 0.396675 |
| C6ORF62    | 6p22.3   | 0.055802 | 0.276631 | 0.396684 |
| JAGN1      | 3p25.3   | -0.05579 | 0.276709 | 0.396767 |
| OVCH2      | 11p15.4  | 0.055784 | 0.276789 | 0.396853 |
| EPB41      | 1p35.3   | 0.055766 | 0.276943 | 0.397046 |
| IL7        | 8q21.13  | -0.05575 | 0.277054 | 0.397168 |
| YKT6       | 7p13     | 0.055752 | 0.277067 | 0.397168 |
| FAM153CP   | 5q35.3   | -0.05575 | 0.277096 | 0.39718  |
| UBA52      | 19p13.11 | 0.055744 | 0.277131 | 0.397201 |
| EXOSC6     | 16q22.1  | 0.055734 | 0.27722  | 0.397301 |
| RB1        | 13q14.2  | 0.055731 | 0.277246 | 0.39731  |



|            |          |          |          |          |
|------------|----------|----------|----------|----------|
| FAM86C2P   | 11q13.2  | -0.05573 | 0.277285 | 0.397315 |
| ALKBH7     | 19p13.3  | -0.05572 | 0.277309 | 0.397315 |
| MRPS24     | 7p13     | 0.055724 | 0.277309 | 0.397315 |
| KRT1       | 12q13.13 | -0.05571 | 0.277392 | 0.397405 |
| LEXM       | 1p32.3   | 0.055707 | 0.277454 | 0.397465 |
| GRIK1-AS1  | 21q21.3  | -0.0557  | 0.277528 | 0.397544 |
| FAM71C     | 12q23.1  | -0.05568 | 0.27767  | 0.397695 |
| ARF5       | 7q32.1   | -0.05568 | 0.277673 | 0.397695 |
| DUSP13     | 10q22.2  | -0.05567 | 0.277777 | 0.397815 |
| UBL5       | 19p13.2  | -0.05566 | 0.277897 | 0.397958 |
| PTCHD3     | 10p12.1  | -0.05562 | 0.278239 | 0.39842  |
| FRMD7      | Xq26.2   | -0.0556  | 0.278415 | 0.398643 |
| H3F3A      | 1q42.12  | -0.05559 | 0.278478 | 0.398705 |
| TLX3       | 5q35.1   | 0.055554 | 0.278774 | 0.399099 |
| LINC00336  | 6p21.31  | 0.055549 | 0.278821 | 0.399138 |
| SCGB2A1    | 11q12.3  | -0.05554 | 0.278934 | 0.399271 |
| TACC2      | 10q26.13 | 0.055522 | 0.279053 | 0.399413 |
| ORC2       | 2q33.1   | 0.055517 | 0.279101 | 0.399454 |
| FAM86DP    | 3p12.3   | 0.055512 | 0.279139 | 0.399479 |
| CRYBB2     | 22q11.23 | 0.055504 | 0.279206 | 0.399512 |
| CACNG8     | 19q13.42 | 0.055501 | 0.279235 | 0.399512 |
| RAB21      | 12q21.1  | -0.0555  | 0.279239 | 0.399512 |
| ARL16      | 17q25.3  | -0.0555  | 0.279243 | 0.399512 |
| SLC6A5     | 11p15.1  | -0.0555  | 0.279261 | 0.399512 |
| PTPRU      | 1p35.3   | -0.05548 | 0.279434 | 0.39973  |
| ENKUR      | 10p12.1  | -0.05547 | 0.279464 | 0.399744 |
| MYH3       | 17p13.1  | 0.055471 | 0.279493 | 0.399758 |
| ADGRG1     | 16q21    | -0.05546 | 0.279585 | 0.399835 |
| PHGDH      | 1p12     | 0.055461 | 0.279587 | 0.399835 |
| TLDC2      | 20q11.23 | -0.05546 | 0.279607 | 0.399836 |
| XRCC4      | 5q14.2   | -0.05545 | 0.279716 | 0.399962 |
| PEX5       | 12p13.31 | -0.05542 | 0.279961 | 0.400266 |
| UQCC1      | 20q11.22 | -0.05542 | 0.279968 | 0.400266 |
| PANX2      | 22q13.33 | -0.0554  | 0.280109 | 0.400439 |
| TRIT1      | 1p34.2   | -0.05536 | 0.280434 | 0.400874 |
| CELA1      | 12q13.13 | 0.055354 | 0.280516 | 0.40096  |
| NIFK       | 2q14.3   | -0.05535 | 0.280534 | 0.40096  |
| ARNT       | 1q21.3   | -0.05533 | 0.280721 | 0.401199 |
| AQP4-AS1   | 18q11.2  | -0.05527 | 0.281241 | 0.401906 |
| IFNL1      | 19q13.2  | 0.055269 | 0.281256 | 0.401906 |
| PDE7A      | 8q13.1   | 0.055249 | 0.281429 | 0.402124 |
| MAP3K11    | 11q13.1  | 0.055229 | 0.281603 | 0.402345 |
| ZNF295-AS1 | 21q22.3  | 0.055225 | 0.281641 | 0.40237  |
| RNASE10    | 14q11.2  | -0.05516 | 0.282196 | 0.403113 |
| FAM219A    | 9p13.3   | 0.055161 | 0.282201 | 0.403113 |
| TNFRSF18   | 1p36.33  | -0.05515 | 0.282256 | 0.403157 |
| PSMC2      | 7q22.1   | -0.05515 | 0.282272 | 0.403157 |
| APOBR      | 16p12.1  | 0.055141 | 0.282368 | 0.403265 |
| WDR19      | 4p14     | -0.05513 | 0.282432 | 0.403307 |
| ZNF597     | 16p13.3  | -0.05513 | 0.282438 | 0.403307 |
| HSFY2      | Yq11.222 | 0.055126 | 0.282502 | 0.403369 |
| LINC00523  | 14q32.2  | -0.05512 | 0.282546 | 0.403376 |
| SNORA48    | 17p13.1  | 0.055119 | 0.282561 | 0.403376 |
| LOC728743  | 7q36.1   | -0.05512 | 0.282581 | 0.403376 |
| ALDH7A1    | 5q23.2   | -0.05512 | 0.282587 | 0.403376 |
| NPHS2      | 1q25.2   | 0.055088 | 0.282833 | 0.403698 |
| MSL3P1     | 2q37.1   | -0.05508 | 0.282914 | 0.403786 |
| ASTL       | 2q11.2   | -0.05506 | 0.283038 | 0.403934 |

|           |                 |          |          |          |
|-----------|-----------------|----------|----------|----------|
| LPP       | 3q27.3-q28      | -0.05506 | 0.28308  | 0.403961 |
| NAP1L1    | 12q21.2         | -0.05505 | 0.283127 | 0.403961 |
| OR1A1     | 17p13.3         | 0.055053 | 0.283138 | 0.403961 |
| ITGA7     | 12q13.2         | -0.05505 | 0.283154 | 0.403961 |
| ALKBH5    | 17p11.2 17p11.2 | -0.05505 | 0.283158 | 0.403961 |
| INO80D    | 2q33.3          | 0.055002 | 0.283588 | 0.404545 |
| SH3GL1    | 19p13.3         | 0.054964 | 0.283922 | 0.40497  |
| ABCD1     | Xq28            | -0.05496 | 0.283926 | 0.40497  |
| MSMB      | 10q11.22        | 0.054941 | 0.284127 | 0.405228 |
| PLEKHB2   | 2q21.1          | -0.05492 | 0.284306 | 0.405412 |
| HCRTR2    | 6p12.1          | -0.05492 | 0.284308 | 0.405412 |
| RRN3      | 16p13.11        | -0.05492 | 0.284317 | 0.405412 |
| RUFY1     | 5q35.3          | 0.054915 | 0.284351 | 0.405432 |
| VPS26A    | 10q22.1         | -0.05491 | 0.284413 | 0.405492 |
| H1FX-AS1  | 3q21.3          | 0.054894 | 0.284538 | 0.405633 |
| PLG       | 6q26            | -0.05489 | 0.284553 | 0.405633 |
| CRX       | 19q13.33        | 0.054886 | 0.284607 | 0.405682 |
| GRID2     | 4q22.1-q22.2    | -0.05487 | 0.284755 | 0.405864 |
| TSPAN14   | 10q23.1         | 0.054856 | 0.284871 | 0.406    |
| SLC9A2    | 2q12.1          | 0.05482  | 0.285184 | 0.406417 |
| PTGFRN    | 1p13.1          | 0.054798 | 0.285383 | 0.406663 |
| RPRD1A    | 18q12.2         | -0.0548  | 0.285397 | 0.406663 |
| KDM4C     | 9p24.1          | 0.054787 | 0.285481 | 0.406754 |
| AMER1     | Xq11.2          | 0.054738 | 0.285914 | 0.407341 |
| CFDP1     | 16q23.1         | -0.05473 | 0.285961 | 0.40738  |
| ENTPD5    | 14q24.3         | -0.05472 | 0.28605  | 0.407474 |
| XAGE2     | Xp11.22         | -0.05472 | 0.286068 | 0.407474 |
| OR10G4    | 11q24.2         | -0.05471 | 0.286161 | 0.407577 |
| SRD5A3    | 4q12            | -0.05471 | 0.286189 | 0.407588 |
| KDM8      | 16p12.1         | 0.05469  | 0.286329 | 0.407758 |
| OR13J1    | 9p13.3          | 0.054688 | 0.286354 | 0.407766 |
| TSPEAR    | 21q22.3         | -0.05468 | 0.286462 | 0.407891 |
| EFL1      | 15q25.2         | 0.054657 | 0.286624 | 0.408092 |
| SOX2-OT   | 3q26.33         | -0.05465 | 0.286716 | 0.408167 |
| MT1G      | 16q13           | -0.05464 | 0.286736 | 0.408167 |
| ADGRE2    | 19p13.12        | -0.05464 | 0.286738 | 0.408167 |
| ACSM4     | 12p13.31        | 0.054638 | 0.286796 | 0.40822  |
| FMR1      | Xq27.3          | 0.054631 | 0.286856 | 0.408277 |
| LINC01881 | 2q37.3          | 0.054609 | 0.287045 | 0.408517 |
| COL6A4P1  | 3p25.1          | 0.054603 | 0.287098 | 0.408563 |
| TM9SF3    | 10q24.1         | 0.054592 | 0.287202 | 0.408683 |
| OR5AC2    | 3q11.2          | 0.054589 | 0.287226 | 0.408687 |
| FRG2C     | 3p12.3          | 0.054578 | 0.287326 | 0.408801 |
| ZDHHC18   | 1p36.11         | -0.05457 | 0.287376 | 0.408842 |
| CDC42SE1  | 1q21.3          | 0.054554 | 0.287534 | 0.409038 |
| GLT1D1    | 12q24.33        | -0.05454 | 0.287701 | 0.409246 |
| KRAS      | 12p12.1         | -0.05453 | 0.287739 | 0.409273 |
| LCE5A     | 1q21.3          | 0.054489 | 0.288112 | 0.409773 |
| GEMIN6    | 2p22.1          | -0.05448 | 0.288199 | 0.409837 |
| CCDC160   | Xq26.2          | -0.05448 | 0.288215 | 0.409837 |
| ZNF234    | 19q13.31        | 0.054477 | 0.288218 | 0.409837 |
| TPPP2     | 14q11.2         | -0.05447 | 0.288305 | 0.409931 |
| STX3      | 11q12.1         | 0.054447 | 0.288483 | 0.410156 |
| FAM92A1P2 | 4q35.1          | -0.05444 | 0.288504 | 0.410157 |
| GABRG1    | 4p12            | -0.05442 | 0.288747 | 0.410472 |
| PIR       | Xp22.2          | 0.054406 | 0.288844 | 0.410582 |
| FAM162A   | 3q21.1          | 0.054404 | 0.288865 | 0.410582 |
| XK        | Xp21.1          | 0.054395 | 0.28894  | 0.410638 |

|            |               |          |          |          |
|------------|---------------|----------|----------|----------|
| PRKAR1B    | 7p22.3        | -0.05439 | 0.288946 | 0.410638 |
| MAPT-IT1   | 17q21.31      | -0.05439 | 0.288969 | 0.410642 |
| MRPL47     | 3q26.33       | 0.05438  | 0.289074 | 0.410762 |
| HIST1H2AE  | 6p22.2        | -0.05437 | 0.289131 | 0.410814 |
| SCGB1B2P   | 19q13.11      | -0.05437 | 0.289174 | 0.410846 |
| TMEM235    | 17q25.3       | 0.054365 | 0.289206 | 0.410863 |
| RASGEF1C   | 5q35.3        | -0.05436 | 0.289287 | 0.410949 |
| ZBTB20     | 3q13.31       | -0.05432 | 0.289576 | 0.411329 |
| XKR9       | 8q13.3        | -0.05431 | 0.289688 | 0.41146  |
| DISC2      | 1q42.2        | -0.05431 | 0.289735 | 0.411497 |
| LGALS7     | 19q13.2       | -0.05426 | 0.290143 | 0.412047 |
| STAC3      | 12q13.3       | 0.054242 | 0.290307 | 0.41223  |
| CLDN19     | 1p34.2        | -0.05424 | 0.290312 | 0.41223  |
| F11        | 4q35.2        | -0.05422 | 0.290491 | 0.412453 |
| HIST2H2AA3 | 1q21.2        | 0.054207 | 0.290619 | 0.412607 |
| COL20A1    | 20q13.33      | 0.054194 | 0.290735 | 0.412742 |
| B3GNT7     | 2q37.1 2q37.1 | 0.054183 | 0.290832 | 0.412851 |
| SMAP1      | 6q13          | -0.05416 | 0.291049 | 0.413122 |
| ATP6V1C2   | -             | -0.05416 | 0.291065 | 0.413122 |
| SECISBP2   | 9q22.2        | 0.054153 | 0.291095 | 0.413136 |
| RALY       | 20q11.22      | -0.05413 | 0.291264 | 0.413347 |
| AQP11      | 11q14.1       | -0.05413 | 0.291288 | 0.41335  |
| RAB11A     | 15q22.31      | -0.05413 | 0.291332 | 0.413357 |
| SNAR-F     | 19q13.33      | 0.054124 | 0.291354 | 0.413357 |
| HIST1H4G   | 6p22.2        | 0.054124 | 0.291354 | 0.413357 |
| XIRP2      | 2q24.3        | -0.05411 | 0.291443 | 0.413454 |
| PNO1       | 2p14          | -0.0541  | 0.291553 | 0.413554 |
| CKM        | 19q13.32      | -0.0541  | 0.291555 | 0.413554 |
| RPAP3      | 12q13.11      | 0.054097 | 0.291599 | 0.413587 |
| PPME1      | 11q13.4       | 0.054089 | 0.291669 | 0.413657 |
| RSPH3      | 6q25.3        | -0.05407 | 0.291855 | 0.413891 |
| HILPDA     | 7q32.1        | -0.05405 | 0.292003 | 0.414072 |
| CBARP      | 19p13.3       | 0.054028 | 0.292215 | 0.414343 |
| PEX3       | 6q24.2        | -0.05401 | 0.292348 | 0.414479 |
| CYP2F1     | 19q13.2       | 0.054013 | 0.292352 | 0.414479 |
| TDRD12     | 19q13.11      | -0.05401 | 0.292406 | 0.414526 |
| ERICH6B    | 13q14.13      | -0.05399 | 0.292553 | 0.414706 |
| PWRN2      | 15q11.2       | 0.053988 | 0.292574 | 0.414706 |
| MOB1A      | 2p13.1        | -0.05397 | 0.292757 | 0.414914 |
| SLFN12L    | 17q12         | -0.05397 | 0.292773 | 0.414914 |
| KIAA1143   | 3p21.31       | -0.05396 | 0.292797 | 0.414914 |
| TPD52L3    | 9p24.1        | 0.053962 | 0.292804 | 0.414914 |
| KCP        | 7q32.1        | 0.053948 | 0.292928 | 0.415061 |
| ZYX        | 7q34          | -0.05394 | 0.293011 | 0.415149 |
| SCARNA4    | 1q22          | -0.05393 | 0.293094 | 0.415237 |
| PIM2       | Xp11.23       | -0.05393 | 0.293136 | 0.415268 |
| METTL15    | 11p14.1       | -0.05392 | 0.293179 | 0.415298 |
| F2         | 11p11.2       | 0.053912 | 0.293254 | 0.415376 |
| LLPH       | 12q14.3       | 0.053902 | 0.293347 | 0.415478 |
| PPP3R2     | 9q31.1        | 0.053897 | 0.293385 | 0.415503 |
| DMTN       | 8p21.3        | -0.05389 | 0.29341  | 0.415509 |
| NAGLU      | 17q21.2       | -0.05389 | 0.293441 | 0.415523 |
| NPDC1      | 9q34.3        | 0.053873 | 0.293602 | 0.415708 |
| METTL16    | 17p13.3       | -0.05387 | 0.293613 | 0.415708 |
| ABCA12     | 2q35          | 0.053864 | 0.293688 | 0.415769 |
| LINC00313  | 21q22.3       | 0.053862 | 0.293698 | 0.415769 |
| NEUROG1    | 5q31.1        | -0.05385 | 0.293803 | 0.415889 |
| RIC8A      | 11p15.5       | -0.05384 | 0.293924 | 0.416    |

|              |              |          |          |          |
|--------------|--------------|----------|----------|----------|
| RCBTB1       | 13q14.2      | -0.05384 | 0.293942 | 0.416    |
| GBX2         | 2q37.2       | -0.05383 | 0.293954 | 0.416    |
| SLC16A3      | 17q25.3      | 0.053833 | 0.293965 | 0.416    |
| GTF2H2       | 5q13.2       | -0.05381 | 0.294135 | 0.416212 |
| KHDC1L       | 6q13         | -0.0538  | 0.294233 | 0.416321 |
| TNIP2        | 4p16.3       | 0.053794 | 0.294317 | 0.41641  |
| MICAL2       | 11p15.3      | -0.05379 | 0.294342 | 0.416416 |
| NLRP13       | 19q13.43     | 0.053787 | 0.29438  | 0.41642  |
| CLIP1        | 12q24.31     | -0.05379 | 0.294387 | 0.41642  |
| NEK5         | 13q14.3      | 0.053777 | 0.294461 | 0.416497 |
| PRSS27       | 16p13.3      | 0.053761 | 0.294608 | 0.416675 |
| CSTB         | 21q22.3      | 0.053751 | 0.294698 | 0.416773 |
| SLC25A30     | 13q14.13     | -0.05374 | 0.2948   | 0.416887 |
| RAPGEF1      | 9q34.13      | 0.053729 | 0.294894 | 0.416967 |
| CLCA3P       | 1p22.3       | 0.053729 | 0.294898 | 0.416967 |
| PTP4A1       | 6q12         | -0.05372 | 0.294964 | 0.41703  |
| RPF2         | 6q21         | 0.053697 | 0.295187 | 0.417316 |
| LRATD1       | 2p24.3       | 0.053687 | 0.295276 | 0.417389 |
| MCF2L2       | 3q27.1       | -0.05369 | 0.29528  | 0.417389 |
| IFI44        | 1p31.1       | -0.05367 | 0.295413 | 0.417506 |
| SNORA79      | 14q31.1      | 0.053671 | 0.295421 | 0.417506 |
| ATP5MPL      | 14q32.33     | 0.05367  | 0.295425 | 0.417506 |
| TGFBRAP1     | 2q12.1-q12.2 | 0.053667 | 0.295452 | 0.417515 |
| QSOX1        | 1q25.2       | 0.053664 | 0.295481 | 0.417524 |
| SLC18A2      | 10q25.3      | -0.05366 | 0.295503 | 0.417524 |
| OR3A4P       | 17p13.3      | 0.05366  | 0.295521 | 0.417524 |
| ZNF256       | 19q13.43     | -0.05365 | 0.295565 | 0.417555 |
| LINC00486    | 2p22.3       | 0.053653 | 0.295585 | 0.417555 |
| PGLYRP2      | 19p13.12     | -0.05365 | 0.29565  | 0.417618 |
| LINC00653    | 20p11.23     | 0.053629 | 0.295796 | 0.417794 |
| TPSG1        | 16p13.3      | -0.05362 | 0.295865 | 0.417863 |
| SLC36A3      | 5q33.1       | -0.05361 | 0.295931 | 0.417905 |
| SNORA68      | 19p13.11     | -0.05361 | 0.295937 | 0.417905 |
| EEF2KMT      | 16p13.3      | 0.053609 | 0.295976 | 0.417931 |
| LAPTM4B      | 8q22.1       | -0.05359 | 0.296149 | 0.418146 |
| CFB          | 6p21.33      | -0.05358 | 0.296281 | 0.418303 |
| NXPH4        | 12q13.3      | 0.053553 | 0.296487 | 0.418564 |
| PPM1J        | 1p13.2       | 0.053522 | 0.296767 | 0.41893  |
| ZNF131       | 5p12         | -0.05351 | 0.296841 | 0.419005 |
| OR10AD1      | 12q13.11     | 0.053493 | 0.297022 | 0.419231 |
| IL1R2        | 2q11.2       | 0.053465 | 0.297283 | 0.419539 |
| FBXO39       | 17p13.1      | -0.05346 | 0.297308 | 0.419539 |
| BFSP1        | 20p12.1      | -0.05346 | 0.297313 | 0.419539 |
| ITGB7        | 12q13.13     | -0.05346 | 0.297324 | 0.419539 |
| TACC1        | 8p11.22      | -0.05345 | 0.297402 | 0.419619 |
| KRT15        | 17q21.2      | -0.05344 | 0.297509 | 0.419741 |
| PUS7         | 7q22.3       | 0.05343  | 0.297597 | 0.419818 |
| TMC3         | 15q25.1      | -0.05343 | 0.297606 | 0.419818 |
| IGSF8        | 1q23.2       | 0.053418 | 0.297708 | 0.419933 |
| MAGEB2       | Xp21.2       | -0.0534  | 0.297863 | 0.420121 |
| SGF29        | 16p11.2      | 0.053391 | 0.29795  | 0.420215 |
| FCRL3        | 1q23.1       | -0.05338 | 0.298086 | 0.420377 |
| PSMA6        | 14q13.2      | -0.05337 | 0.298182 | 0.420483 |
| MAPKAPK5-AS1 | 12q24.12     | -0.05336 | 0.29821  | 0.420492 |
| SPATA18      | 4q12         | -0.05336 | 0.298247 | 0.420514 |
| SNORA15      | 7p11.2       | 0.053356 | 0.298272 | 0.42052  |
| HSD17B12     | 11p11.2      | -0.05335 | 0.298327 | 0.420568 |
| PPP1R9A      | 7q21.3       | 0.053336 | 0.298446 | 0.420706 |

|            |              |          |          |          |
|------------|--------------|----------|----------|----------|
| HTR1E      | 6q14.3       | -0.05333 | 0.298541 | 0.420807 |
| ADIPOR2    | 12p13.33     | 0.053324 | 0.298559 | 0.420807 |
| SLC35D3    | 6q23.3       | -0.0533  | 0.298818 | 0.421141 |
| FAM217A    | 6p25.2       | 0.053283 | 0.298926 | 0.421228 |
| ENOX2      | Xq26.1       | -0.05328 | 0.29893  | 0.421228 |
| ZNF275     | Xq28         | 0.053282 | 0.298942 | 0.421228 |
| SERPIND1   | 22q11.21     | -0.05328 | 0.298999 | 0.421278 |
| BRD7       | 16q12.1      | 0.053257 | 0.299167 | 0.421486 |
| NIBAN3     | 19p13.11     | -0.05325 | 0.299197 | 0.421499 |
| PEAR1      | 1q23.1       | 0.053251 | 0.299222 | 0.421504 |
| MSRB2      | 10p12.2      | -0.05324 | 0.299341 | 0.421642 |
| TMEM138    | 11q12.2      | 0.053231 | 0.299406 | 0.421703 |
| NPAT       | 11q22.3      | -0.05322 | 0.299478 | 0.421776 |
| ANKRD34A   | 1q21.1       | -0.05322 | 0.299522 | 0.421803 |
| TRABD2A    | 2p11.2       | 0.053212 | 0.299576 | 0.421803 |
| CDKN2B-AS1 | 9p21.3       | -0.05321 | 0.299584 | 0.421803 |
| CEACAM18   | 19q13.41     | -0.05321 | 0.299588 | 0.421803 |
| PAGE5      | Xp11.21      | -0.05321 | 0.299603 | 0.421803 |
| IQCF3      | 3p21.2       | 0.053191 | 0.299769 | 0.422008 |
| ADCY10     | 1q24.2       | 0.053174 | 0.299917 | 0.422185 |
| MGAT5      | 2q21.2-q21.3 | -0.05317 | 0.299974 | 0.422236 |
| NOP10      | 15q14        | -0.05314 | 0.300231 | 0.422568 |
| CC2D1B     | 1p32.3       | 0.053136 | 0.30027  | 0.422593 |
| TMEM231    | 16q23.1      | 0.053124 | 0.300378 | 0.422715 |
| CXORF40B   | Xq28         | -0.05311 | 0.300509 | 0.422871 |
| CASP5      | 11q22.3      | 0.053075 | 0.300827 | 0.423288 |
| MYMK       | 9q34.2       | -0.05307 | 0.30088  | 0.423317 |
| INPP5F     | 10q26.11     | 0.053068 | 0.30089  | 0.423317 |
| SH2D2A     | 1q23.1       | 0.053061 | 0.300953 | 0.423376 |
| ABCC12     | 16q12.1      | 0.053055 | 0.301007 | 0.423423 |
| FOXH1      | 8q24.3       | 0.053033 | 0.301206 | 0.423673 |
| RPLP1      | 15q23        | -0.05303 | 0.30123  | 0.423676 |
| OR6S1      | 14q11.2      | 0.053016 | 0.301357 | 0.423825 |
| ANP32C     | 4q32.3       | 0.053013 | 0.301384 | 0.423833 |
| CFAP65     | 2q35         | 0.053006 | 0.301456 | 0.423905 |
| SPNS1      | 16p11.2      | 0.053002 | 0.301493 | 0.423928 |
| B3GNT5     | 3q27.1       | -0.05295 | 0.301928 | 0.424509 |
| PEX5L      | 3q26.33      | 0.052944 | 0.302016 | 0.424581 |
| ALX4       | 11p11.2      | -0.05294 | 0.302022 | 0.424581 |
| GBAP1      | 1q22         | 0.052934 | 0.302113 | 0.42468  |
| WNT7B      | 22q13.31     | 0.052927 | 0.302179 | 0.424715 |
| DYNAP      | 18q21.2      | -0.05293 | 0.30218  | 0.424715 |
| IRF8       | 16q24.1      | 0.052916 | 0.302276 | 0.42482  |
| C17ORF50   | 17q12        | -0.05291 | 0.302352 | 0.424896 |
| SIPA1L2    | 1q42.2       | 0.052867 | 0.302728 | 0.425395 |
| MAK16      | 8p12         | 0.05285  | 0.302883 | 0.425535 |
| ITIH4      | 3p21.1       | 0.052849 | 0.302891 | 0.425535 |
| CTDSPL     | 3p22.2       | 0.052849 | 0.302891 | 0.425535 |
| NCCRP1     | 19q13.2      | -0.05284 | 0.302985 | 0.425633 |
| ADAM21     | 14q24.2      | -0.05284 | 0.303004 | 0.425633 |
| TP53BP1    | 15q15.3      | -0.05283 | 0.303091 | 0.425714 |
| TTC29      | 4q31.22      | 0.052826 | 0.303103 | 0.425714 |
| SLC29A1    | 6p21.1       | 0.052816 | 0.303187 | 0.425802 |
| ASB17      | 1p31.1       | 0.052811 | 0.303235 | 0.425836 |
| APOL6      | 22q12.3      | -0.05281 | 0.303254 | 0.425836 |
| RIDA       | 8q22.2       | -0.05279 | 0.30343  | 0.426053 |
| KIF6       | 6p21.2       | -0.05277 | 0.303568 | 0.426207 |
| STS        | Xp22.31      | 0.052773 | 0.303588 | 0.426207 |

|            |          |          |          |          |
|------------|----------|----------|----------|----------|
| CAPN5      | 11q13.5  | 0.052771 | 0.303604 | 0.426207 |
| ADAM10     | 15q21.3  | -0.05275 | 0.303835 | 0.426502 |
| KRTAP3-3   | 17q21.2  | -0.05273 | 0.303961 | 0.426627 |
| PNPLA6     | 19p13.2  | 0.05273  | 0.303975 | 0.426627 |
| TRNP1      | 1p36.11  | -0.05273 | 0.303988 | 0.426627 |
| DEFB131A   | 4p16.1   | 0.052703 | 0.304229 | 0.426936 |
| WDR11      | 10q26.12 | -0.05266 | 0.304608 | 0.427438 |
| RPL17      | 18q21.1  | -0.05263 | 0.304905 | 0.427825 |
| PPID       | 4q32.1   | -0.05263 | 0.304941 | 0.427845 |
| IL1A       | 2q14.1   | 0.052608 | 0.305101 | 0.428038 |
| RHPN1-AS1  | 8q24.3   | -0.0526  | 0.305211 | 0.428163 |
| CARMN      | 5q32     | -0.05259 | 0.30526  | 0.428202 |
| ZNF286A    | 17p12    | -0.05258 | 0.305351 | 0.4283   |
| CHRNA9     | 4p14     | -0.05257 | 0.305454 | 0.428414 |
| RASAL3     | 19p13.12 | -0.05255 | 0.305613 | 0.428605 |
| FLYWCH1    | 16p13.3  | 0.05255  | 0.305633 | 0.428605 |
| NXF2       | Xq22.1   | -0.05255 | 0.305662 | 0.428616 |
| GAGE2C     | Xp11.23  | -0.05254 | 0.305683 | 0.428616 |
| GPT        | 8q24.3   | 0.052523 | 0.305883 | 0.428847 |
| CCL27      | 9p13.3   | 0.052522 | 0.305891 | 0.428847 |
| FAM3A      | Xq28     | -0.05251 | 0.306012 | 0.428987 |
| SPEM1      | 17p13.1  | 0.052504 | 0.306057 | 0.429019 |
| YES1       | 18p11.32 | 0.052502 | 0.306078 | 0.429019 |
| NOA1       | 4q12     | 0.052497 | 0.306123 | 0.429053 |
| PLSCR1     | 3q24     | -0.05249 | 0.306189 | 0.429114 |
| USP17L9P   | 4p16.1   | 0.052486 | 0.306225 | 0.429134 |
| ADGRE4P    | 19p13.2  | 0.052482 | 0.306265 | 0.429161 |
| GLRX5      | 14q32.13 | 0.05247  | 0.306374 | 0.429283 |
| NUPR2      | 7p11.2   | 0.052461 | 0.306454 | 0.429366 |
| PDHX       | 11p13    | 0.052441 | 0.306646 | 0.429605 |
| EDAR       | 2q13     | 0.052433 | 0.306716 | 0.429672 |
| ZBTB34     | 9q33.3   | 0.052423 | 0.306807 | 0.429727 |
| CACUL1     | 10q26.11 | 0.052422 | 0.306818 | 0.429727 |
| ACAN       | 15q26.1  | 0.052422 | 0.306819 | 0.429727 |
| PIK3C2G    | 12p12.3  | -0.05242 | 0.306842 | 0.429729 |
| SPTSSB     | 3q26.1   | -0.0524  | 0.307038 | 0.429974 |
| ZCCHC14    | 16q24.2  | 0.052384 | 0.307167 | 0.430124 |
| VWC2L      | 2q34-q35 | -0.05238 | 0.307213 | 0.430158 |
| RAB3B      | 1p32.3   | -0.05238 | 0.307248 | 0.430178 |
| RPL12      | 9q33.3   | -0.05236 | 0.307372 | 0.430303 |
| PRDM13     | 6q16.2   | 0.052361 | 0.307381 | 0.430303 |
| ZNF615     | 19q13.41 | -0.05234 | 0.30754  | 0.430495 |
| ZNF614     | 19q13.41 | -0.05234 | 0.307605 | 0.430557 |
| BEST4      | 1p34.1   | -0.05233 | 0.307682 | 0.430634 |
| PNLIPRP2   | 10q25.3  | 0.052317 | 0.307787 | 0.430752 |
| RTN4RL2    | 11q12.1  | -0.05229 | 0.308081 | 0.431132 |
| SYNPO2L    | 10q22.2  | -0.05227 | 0.308206 | 0.431278 |
| YRDC       | 1p34.3   | 0.052269 | 0.308231 | 0.431281 |
| BTNL3      | 5q35.3   | 0.052267 | 0.308251 | 0.431281 |
| COBLL1     | 2q24.3   | -0.05226 | 0.308313 | 0.431337 |
| PSMA5      | 1p13.3   | 0.052256 | 0.308349 | 0.431338 |
| PHF20L1    | 8q24.22  | -0.05226 | 0.308357 | 0.431338 |
| SULT1B1    | 4q13.3   | -0.05224 | 0.308493 | 0.431473 |
| KHDRBS1    | 1p35.2   | 0.052241 | 0.308497 | 0.431473 |
| ANKRD20A9P | 13q11    | 0.052234 | 0.308557 | 0.431527 |
| CARNMT1    | 9q21.13  | 0.052204 | 0.308832 | 0.431882 |
| CCDC65     | 12q13.12 | 0.052193 | 0.30894  | 0.43199  |
| BTN3A1     | 6p22.2   | -0.05219 | 0.308952 | 0.43199  |

|               |               |          |          |          |
|---------------|---------------|----------|----------|----------|
| MYPN          | 10q21.3       | -0.05218 | 0.309064 | 0.432116 |
| UGT1A5        | 2q37.1        | -0.05217 | 0.309105 | 0.432143 |
| AFAP1-AS1     | 4p16.1        | 0.05217  | 0.309149 | 0.432166 |
| BCL11B        | 14q32.2       | 0.052168 | 0.30917  | 0.432166 |
| HTR1D         | 1p36.12       | 0.052166 | 0.309186 | 0.432166 |
| SPPL2C        | 17q21.31      | 0.052152 | 0.309319 | 0.432321 |
| SLC10A2       | 13q33.1       | 0.052146 | 0.309375 | 0.432369 |
| C19ORF25      | 19p13.3       | 0.052129 | 0.309528 | 0.432553 |
| FGFRL1        | 4p16.3        | 0.05212  | 0.309616 | 0.432646 |
| RBPJL         | 20q13.12      | -0.05211 | 0.309706 | 0.432741 |
| SH3PXD2A      | 10q24.33      | -0.05208 | 0.309995 | 0.433114 |
| CCZ1P-OR7E38P | 7q21.3        | -0.05208 | 0.310019 | 0.433118 |
| SLFN13        | 17q12         | -0.05206 | 0.310151 | 0.433272 |
| DYRK3         | 1q32.1        | -0.05204 | 0.310391 | 0.433578 |
| KTN1          | 14q22.3       | -0.05203 | 0.310447 | 0.433626 |
| TGM7          | 15q15.2-q15.3 | -0.05201 | 0.310612 | 0.433812 |
| PRKD2         | 19q13.32      | 0.05201  | 0.31064  | 0.433812 |
| GLCCI1        | 7p21.3        | -0.05201 | 0.310646 | 0.433812 |
| ADRA2C        | 4p16.3        | -0.05201 | 0.310668 | 0.433813 |
| GATA3-AS1     | 10p14         | 0.051991 | 0.31082  | 0.433995 |
| CLEC19A       | 16p12.3       | -0.05197 | 0.310985 | 0.434182 |
| ALMS1P1       | 2p13.1        | -0.05197 | 0.310997 | 0.434182 |
| GNE           | 9p13.3        | 0.051964 | 0.311067 | 0.434249 |
| ADAMTS8       | 11q24.3       | -0.05195 | 0.311169 | 0.434362 |
| CEACAM7       | 19q13.2       | -0.05194 | 0.311248 | 0.434441 |
| WNT1          | 12q13.12      | -0.05192 | 0.311464 | 0.434699 |
| F13B          | 1q31.3        | 0.05192  | 0.311476 | 0.434699 |
| GOLGB1        | 3q13.33       | 0.051911 | 0.311559 | 0.434772 |
| KRTAP12-2     | 21q22.3       | 0.05191  | 0.311572 | 0.434772 |
| RNF44         | 5q35.2        | 0.051899 | 0.311674 | 0.434884 |
| SNRNP35       | 12q24.31      | 0.051859 | 0.312044 | 0.43537  |
| ZNF394        | 7q22.1        | -0.05185 | 0.312094 | 0.43541  |
| DCTN6         | 8p12          | -0.05182 | 0.31238  | 0.435778 |
| TXNDC8        | 9q31.3        | -0.0518  | 0.312587 | 0.436021 |
| KRT12         | 17q21.2       | -0.0518  | 0.312598 | 0.436021 |
| ZG16B         | 16p13.3       | -0.0518  | 0.312645 | 0.436047 |
| MAS1L         | 6p22.1        | -0.05179 | 0.31266  | 0.436047 |
| DIP2B         | 12q13.12      | 0.051761 | 0.312964 | 0.436441 |
| NDUFA4L2      | 12q13.3       | -0.05176 | 0.312994 | 0.436452 |
| ENDOD1        | 11q21         | -0.05175 | 0.31303  | 0.436473 |
| HSD3B7        | 16p11.2       | 0.05175  | 0.313071 | 0.436487 |
| KCNF1         | 2p25.1        | -0.05175 | 0.313098 | 0.436487 |
| GH1           | 17q23.3       | -0.05175 | 0.313106 | 0.436487 |
| OTOS          | 2q37.3        | 0.05173  | 0.313254 | 0.436634 |
| UPK3A         | 22q13.31      | 0.05173  | 0.313255 | 0.436634 |
| GATD3A        | 21q22.3       | -0.05172 | 0.313375 | 0.436771 |
| TMCC3         | 12q22         | -0.05169 | 0.313603 | 0.437058 |
| ERC1          | 12p13.33      | -0.05169 | 0.313627 | 0.437062 |
| ICE1          | 5p15.32       | 0.051688 | 0.313649 | 0.437062 |
| ZNF837        | 19q13.43      | -0.05167 | 0.313827 | 0.437279 |
| RIT2          | 18q12.3       | 0.051659 | 0.313922 | 0.437381 |
| SLC17A2       | 6p22.2        | -0.05165 | 0.31402  | 0.437488 |
| ADSL          | 22q13.1       | -0.05164 | 0.314102 | 0.437571 |
| LINC00240     | 6p22.2        | 0.051624 | 0.314245 | 0.43774  |
| RBM26         | 13q31.1       | 0.051615 | 0.314338 | 0.437811 |
| UNC13D        | 17q25.1       | 0.051614 | 0.31434  | 0.437811 |
| RTN4IP1       | 6q21          | 0.051609 | 0.314393 | 0.437845 |
| CAVIN4        | 9q31.1        | 0.051607 | 0.314408 | 0.437845 |

|           |            |          |          |          |
|-----------|------------|----------|----------|----------|
| TBK1      | 12q14.2    | -0.05159 | 0.314522 | 0.437973 |
| PDS5A     | 4p14       | 0.051585 | 0.314617 | 0.438075 |
| ZFP90     | 16q22.1    | -0.05157 | 0.314797 | 0.438295 |
| PRR32     | Xq25       | -0.05156 | 0.314843 | 0.438328 |
| PPFIBP2   | 11p15.4    | -0.05155 | 0.314949 | 0.438446 |
| SKINT1L   | 1p33       | 0.051536 | 0.315074 | 0.43859  |
| PTPRF     | 1p34.2     | -0.05151 | 0.315301 | 0.438851 |
| HES3      | 1p36.31    | -0.05151 | 0.315307 | 0.438851 |
| TGIF2LX   | Xq21.31    | 0.051509 | 0.315328 | 0.438851 |
| C8ORF44   | 8q13.1     | 0.051501 | 0.315404 | 0.438927 |
| IRX4      | 5p15.33    | 0.051498 | 0.315432 | 0.438935 |
| RABL3     | 3q13.33    | -0.05147 | 0.315718 | 0.439303 |
| TTC37     | 5q15       | 0.051432 | 0.316055 | 0.439741 |
| HS3ST6    | 16p13.3    | -0.05142 | 0.316167 | 0.439806 |
| CARD17    | 11q22.3    | -0.05142 | 0.316175 | 0.439806 |
| KCTD15    | 19q13.11   | -0.05142 | 0.316185 | 0.439806 |
| LIN28B    | 6q16.3-q21 | -0.05142 | 0.316189 | 0.439806 |
| LGALS17A  | 19q13.2    | -0.05141 | 0.316221 | 0.43982  |
| NACA4P    | 8q22.3     | -0.0514  | 0.316394 | 0.440029 |
| BIK       | 22q13.2    | 0.051358 | 0.316751 | 0.440496 |
| TMEM40    | 3p25.2     | -0.05134 | 0.316903 | 0.440677 |
| SPINK8    | 3p21.31    | 0.051337 | 0.316953 | 0.440686 |
| MEP1A     | 6p12.3     | -0.05134 | 0.316954 | 0.440686 |
| CAPZB     | 1p36.13    | -0.05133 | 0.316985 | 0.440698 |
| PIPOX     | 17q11.2    | -0.05133 | 0.317044 | 0.440749 |
| ABCA3     | 16p13.3    | 0.051305 | 0.317253 | 0.44101  |
| C1ORF127  | 1p36.22    | -0.0513  | 0.317299 | 0.441043 |
| OGFR      | 20q13.33   | 0.051286 | 0.317432 | 0.44117  |
| PTPN14    | 1q32.3-q41 | 0.051286 | 0.317434 | 0.44117  |
| IDH1      | 2q34       | -0.0512  | 0.318244 | 0.442265 |
| STXBP6    | 14q12      | -0.05118 | 0.318395 | 0.442444 |
| OTX2      | 14q22.3    | -0.05118 | 0.318434 | 0.442467 |
| MAP3K14   | 17q21.31   | -0.05114 | 0.318813 | 0.442957 |
| ONECUT2   | 18q21.31   | 0.051138 | 0.318832 | 0.442957 |
| ADGRG3    | 16q21      | -0.05114 | 0.318853 | 0.442957 |
| LCT       | 2q21.3     | -0.05113 | 0.318914 | 0.443011 |
| EIF4E1B   | 5q35.2     | -0.0511  | 0.319159 | 0.44332  |
| LINC00934 | 12q24.23   | -0.0511  | 0.3192   | 0.443346 |
| CT47A2    | Xq24       | -0.0511  | 0.319231 | 0.443359 |
| TAS2R30   | 12p13.2    | 0.05108  | 0.31938  | 0.443536 |
| RPGR      | Xp11.4     | 0.051065 | 0.319522 | 0.443701 |
| ANKLE1    | 19p13.11   | 0.051059 | 0.319577 | 0.443748 |
| FCN3      | 1p36.11    | -0.05104 | 0.319738 | 0.44394  |
| HECTD1    | 14q12      | 0.051028 | 0.319877 | 0.444103 |
| FARP1     | 13q32.2    | -0.05102 | 0.319963 | 0.444191 |
| RTL6      | 22q13.31   | -0.05102 | 0.319992 | 0.444192 |
| APOBEC4   | 1q25.3     | 0.051012 | 0.320025 | 0.444192 |
| ZNF479    | 7p11.2     | -0.05101 | 0.320031 | 0.444192 |
| RCC1L     | 7q11.23    | 0.050999 | 0.320149 | 0.444326 |
| FAM222B   | 17q11.2    | -0.05099 | 0.320233 | 0.444404 |
| MAPK13    | 6p21.31    | 0.050987 | 0.320264 | 0.444404 |
| SSBP4     | 19p13.11   | 0.050986 | 0.320272 | 0.444404 |
| ID2B      | 3p14.2     | -0.05098 | 0.320352 | 0.444484 |
| EFCAB13   | 17q21.32   | 0.050973 | 0.320398 | 0.444517 |
| ADRA1A    | 8p21.2     | -0.05097 | 0.320447 | 0.444554 |
| KLHL40    | 3p22.1     | -0.05096 | 0.320545 | 0.44466  |
| CYB561D2  | 3p21.31    | 0.05095  | 0.320618 | 0.44473  |
| NOL4L     | 20q11.21   | -0.05095 | 0.320659 | 0.444756 |



|           |                |          |          |          |
|-----------|----------------|----------|----------|----------|
| MRPS17    | 7p11.2         | 0.050922 | 0.32088  | 0.445009 |
| LOC441601 | 11p11.12       | -0.05092 | 0.320885 | 0.445009 |
| RPS17     | 15q25.2        | 0.050903 | 0.321064 | 0.445226 |
| CSTF1     | 20q13.2-q13.31 | -0.05088 | 0.321247 | 0.445448 |
| YIPF6     | Xq12-q13.1     | -0.05088 | 0.321296 | 0.445485 |
| PKP1      | 1q32.1         | -0.05086 | 0.321429 | 0.445639 |
| ANGPT4    | 20p13          | -0.05086 | 0.321462 | 0.445646 |
| SPSB3     | 16p13.3        | 0.05086  | 0.321478 | 0.445646 |
| RBAK      | 7p22.1         | 0.050837 | 0.321696 | 0.445916 |
| RNF125    | 18q12.1        | 0.050821 | 0.321844 | 0.44609  |
| KLHL35    | 11q13.4        | 0.050817 | 0.321885 | 0.446116 |
| CSRP3     | 11p15.1        | 0.050806 | 0.321986 | 0.446225 |
| FARP2     | 2q37.3         | 0.050773 | 0.322306 | 0.446638 |
| MSRA      | 8p23.1         | -0.05076 | 0.322382 | 0.446712 |
| OR2B2     | 6p22.1         | 0.050747 | 0.322551 | 0.446916 |
| PSMA8     | 18q11.2        | 0.050738 | 0.322638 | 0.446956 |
| PARP10    | 8q24.3         | 0.050737 | 0.322645 | 0.446956 |
| FOXA3     | 19q13.32       | 0.050737 | 0.322647 | 0.446956 |
| ZNF644    | 1p22.2         | -0.05071 | 0.322887 | 0.447258 |
| FAM83A    | 8q24.13        | 0.050706 | 0.322942 | 0.447288 |
| RANBP2    | 2q13           | 0.050704 | 0.322961 | 0.447288 |
| IL6       | 7p15.3         | -0.0507  | 0.322976 | 0.447288 |
| RASA1     | 5q14.3         | -0.05069 | 0.323064 | 0.44738  |
| MT1E      | 16q13          | -0.05069 | 0.323097 | 0.447394 |
| CFAP46    | 10q26.3        | -0.05069 | 0.323126 | 0.447404 |
| RBM27     | 5q32           | 0.050681 | 0.323186 | 0.447455 |
| CAMK1D    | 10p13          | -0.05067 | 0.323301 | 0.447584 |
| ARFIP2    | 11p15.4        | 0.05066  | 0.323381 | 0.447641 |
| SIGLEC12  | 19q13.41       | -0.05066 | 0.323387 | 0.447641 |
| TARM1     | 19q13.42       | -0.05065 | 0.323433 | 0.447674 |
| TMPRSS2   | 21q22.3        | 0.050648 | 0.323496 | 0.447731 |
| MANF      | 3p21.2         | -0.05064 | 0.323542 | 0.447733 |
| NDST4     | 4q26           | 0.050643 | 0.323543 | 0.447733 |
| LINC00635 | 3q13.12        | 0.050598 | 0.323973 | 0.448297 |
| C8A       | 1p32.2         | -0.05059 | 0.324038 | 0.448356 |
| RPS18     | 6p21.32        | -0.05059 | 0.324092 | 0.4484   |
| BOD1      | 5q35.2         | -0.05058 | 0.32415  | 0.448449 |
| KCNS2     | 8q22.2         | -0.05055 | 0.324418 | 0.448789 |
| SCARNA3   | 1q25.1         | 0.050549 | 0.324449 | 0.448801 |
| YBX3P1    | 16p11.2        | -0.05055 | 0.324475 | 0.448807 |
| OR2L1P    | 1q44           | 0.05053  | 0.324631 | 0.44899  |
| ZNF101    | 19p13.11       | -0.05052 | 0.32468  | 0.449027 |
| LRR37A6P  | 10p12.1        | 0.050514 | 0.324781 | 0.449104 |
| HAUS1     | 18q21.1        | 0.050514 | 0.324785 | 0.449104 |
| LPAR3     | 1p22.3         | -0.05051 | 0.324803 | 0.449104 |
| GAL       | 11q13.2        | 0.050504 | 0.324873 | 0.44917  |
| TMEM107   | 17p13.1        | 0.050495 | 0.324965 | 0.449244 |
| RAVER2    | 1p31.3         | 0.050494 | 0.324971 | 0.449244 |
| ZFP57     | 6p22.1         | -0.05049 | 0.325026 | 0.449288 |
| C16ORF78  | 16q12.1        | -0.05048 | 0.325107 | 0.44937  |
| ADAM21P1  | 14q24.2        | 0.050454 | 0.325357 | 0.449676 |
| CDC42EP2  | 11q13.1        | 0.050452 | 0.325374 | 0.449676 |
| CCL25     | 19p13.2        | 0.050449 | 0.325408 | 0.449693 |
| FRYL      | 4p11           | -0.05043 | 0.325556 | 0.449866 |
| AP3B1     | 5q14.1         | 0.050426 | 0.325624 | 0.449929 |
| PGK2      | 6p12.3         | 0.050411 | 0.325765 | 0.45007  |
| RAB19     | 7q34           | 0.050411 | 0.325771 | 0.45007  |
| TERF2     | 16q22.1        | 0.050407 | 0.325808 | 0.45009  |

|              |          |          |          |          |
|--------------|----------|----------|----------|----------|
| ZNF500       | 16p13.3  | 0.050404 | 0.325833 | 0.450094 |
| PTRH2        | 17q23.1  | -0.0504  | 0.325866 | 0.450108 |
| UTP11        | 1p34.3   | 0.050364 | 0.32622  | 0.450566 |
| SRD5A2       | 2p23.1   | -0.05034 | 0.326416 | 0.450806 |
| MRPS15       | 1p34.3   | 0.050325 | 0.326601 | 0.45103  |
| SERBP1       | 1p31.3   | 0.050321 | 0.326632 | 0.451042 |
| LOC100130264 | 20p11.23 | -0.0503  | 0.326808 | 0.451253 |
| ELOVL5       | 6p12.1   | -0.05027 | 0.327163 | 0.451713 |
| PPP4R3A      | 14q32.12 | 0.050248 | 0.327337 | 0.451922 |
| CCT2         | 12q15    | 0.050224 | 0.327572 | 0.452187 |
| SOX1         | 13q34    | 0.050224 | 0.327574 | 0.452187 |
| CYP2J2       | 1p32.1   | 0.050221 | 0.327599 | 0.45219  |
| C22ORF46     | 22q13.2  | -0.05022 | 0.327655 | 0.452226 |
| HEATR6       | 17q23.1  | -0.05021 | 0.32767  | 0.452226 |
| LINC01091    | 4q28.1   | -0.05021 | 0.327729 | 0.452273 |
| MDS2         | 1p36.11  | -0.05021 | 0.327749 | 0.452273 |
| CHRNA2       | 8p21.2   | -0.0502  | 0.327815 | 0.452333 |
| OR4K15       | 14q11.2  | -0.05018 | 0.328026 | 0.452588 |
| HYAL4        | 7q31.32  | -0.05017 | 0.328045 | 0.452588 |
| ACMSD        | 2q21.3   | 0.05017  | 0.328089 | 0.452617 |
| MRNIP        | 5q35.3   | -0.05016 | 0.328193 | 0.452729 |
| ARAP3        | 5q31.3   | 0.050145 | 0.328334 | 0.452893 |
| TIA1         | 2p13.3   | -0.05014 | 0.328359 | 0.452896 |
| CDH16        | 16q22.1  | 0.050132 | 0.328461 | 0.453005 |
| ACHE         | 7q22.1   | -0.05012 | 0.328557 | 0.453106 |
| LHCGR        | 2p16.3   | -0.05011 | 0.328624 | 0.453168 |
| ZNF575       | 19q13.31 | 0.05011  | 0.328675 | 0.453207 |
| NARF         | 17q25.3  | -0.0501  | 0.328734 | 0.453256 |
| ZNF205-AS1   | 16p13.3  | -0.0501  | 0.328771 | 0.453277 |
| KANSL3       | 2q11.2   | 0.050093 | 0.328838 | 0.453295 |
| LINC00310    | 21q22.11 | -0.05009 | 0.328857 | 0.453295 |
| CLEC12B      | 12p13.2  | -0.05009 | 0.328874 | 0.453295 |
| MRPL38       | 17q25.1  | 0.050089 | 0.328875 | 0.453295 |
| TDGF1        | 3p21.31  | -0.05008 | 0.329006 | 0.453445 |
| PNPO         | 17q21.32 | 0.050069 | 0.329069 | 0.4535   |
| SGPL1        | 10q22.1  | -0.05006 | 0.329135 | 0.453558 |
| CBFA2T3      | 16q24.3  | -0.05006 | 0.329156 | 0.453558 |
| SDHAF3       | 7q21.3   | -0.05005 | 0.329292 | 0.453713 |
| BAAT         | 9q31.1   | -0.05004 | 0.32939  | 0.453818 |
| KIF1C        | 17p13.2  | -0.05003 | 0.329471 | 0.453898 |
| IFNA2        | 9p21.3   | 0.050024 | 0.329505 | 0.453914 |
| MRPS30       | 5p12     | 0.050017 | 0.329573 | 0.453945 |
| MGAT3        | 22q13.1  | 0.050017 | 0.329573 | 0.453945 |
| CASC3        | 17q21.1  | -0.05001 | 0.329631 | 0.453994 |
| FAM189A2     | 9q21.12  | -0.05001 | 0.329671 | 0.454018 |
| MRPL19       | 2p12     | 0.050001 | 0.329727 | 0.454063 |
| B3GNT3       | 19p13.11 | -0.05    | 0.329777 | 0.454101 |
| APOL5        | 22q12.3  | -0.04997 | 0.330023 | 0.454409 |
| SNAP29       | 22q11.21 | -0.04994 | 0.330353 | 0.454831 |
| SLC18A1      | 8p21.3   | -0.04993 | 0.330433 | 0.4549   |
| GRID2IP      | 7p22.1   | -0.04993 | 0.330448 | 0.4549   |
| NPAS4        | 11q13.2  | -0.0499  | 0.33071  | 0.455229 |
| LOC100240734 | 12q13.13 | -0.0499  | 0.330743 | 0.455243 |
| AKR1C8P      | 10p15.1  | 0.04988  | 0.330897 | 0.455424 |
| NCOA5        | 20q13.12 | -0.04987 | 0.331005 | 0.455541 |
| ATP11C       | Xq27.1   | 0.049854 | 0.331153 | 0.455714 |
| TAOK3        | 12q24.23 | -0.04985 | 0.33118  | 0.45572  |
| ALDOC        | 17q11.2  | -0.0498  | 0.331659 | 0.456348 |

|           |              |          |          |          |
|-----------|--------------|----------|----------|----------|
| CA6       | 1p36.23      | -0.04979 | 0.331742 | 0.456429 |
| ZIM3      | 19q13.43     | -0.04979 | 0.331764 | 0.456429 |
| C7ORF65   | 7p12.3       | -0.04978 | 0.331871 | 0.456545 |
| CCDC105   | 19p13.12     | -0.04977 | 0.331955 | 0.456663 |
| MYOG      | 1q32.1       | -0.04976 | 0.332018 | 0.456684 |
| FCGR3B    | 1q23.3       | -0.04975 | 0.332208 | 0.456914 |
| HSP90B1   | 12q23.3      | -0.04974 | 0.332252 | 0.456943 |
| BHLHE40   | 3p26.1       | -0.04971 | 0.332533 | 0.457298 |
| SLC25A17  | 22q13.2      | -0.04971 | 0.332589 | 0.457344 |
| TRIM63    | 1p36.11      | -0.04969 | 0.332782 | 0.457579 |
| ARL14     | 3q25.33      | 0.049678 | 0.332864 | 0.457659 |
| SAMD15    | 14q24.3      | 0.049672 | 0.332923 | 0.457686 |
| KRTAP10-6 | 21q22.3      | 0.049671 | 0.332929 | 0.457686 |
| MCOLN1    | 19p13.2      | -0.04967 | 0.332962 | 0.457701 |
| TRIM71    | 3p22.3       | -0.04966 | 0.333047 | 0.457786 |
| MT4       | 16q13        | -0.04965 | 0.333167 | 0.457919 |
| FASTKD5   | 20p13        | 0.049642 | 0.333214 | 0.457952 |
| BSND      | 1p32.3       | -0.04964 | 0.333261 | 0.457985 |
| SACS      | 13q12.12     | 0.049609 | 0.333531 | 0.458325 |
| RITA1     | 12q24.13     | 0.049604 | 0.333588 | 0.458372 |
| HSPE1     | 2q33.1       | 0.049594 | 0.33368  | 0.458467 |
| TOPORS    | 9p21.1       | -0.04958 | 0.333777 | 0.458569 |
| ZNF606    | 19q13.43     | -0.04958 | 0.333817 | 0.458592 |
| PLK3      | 1p34.1       | -0.04957 | 0.333964 | 0.458763 |
| FAM13A    | 4q22.1       | -0.04955 | 0.334153 | 0.458991 |
| TMEM139   | 7q34         | -0.04952 | 0.33437  | 0.459257 |
| BOLA1     | 1q21.2       | 0.04952  | 0.334406 | 0.459275 |
| IQCH      | 15q23        | 0.049512 | 0.334479 | 0.459314 |
| JOSD1     | 22q13.1      | 0.049511 | 0.334492 | 0.459314 |
| REPS2     | Xp22.2       | -0.04951 | 0.334524 | 0.459314 |
| CUL4A     | 13q34        | 0.049508 | 0.334526 | 0.459314 |
| GTSE1-DT  | 22q13.31     | 0.049505 | 0.33455  | 0.459315 |
| ICAM3     | 19p13.2      | -0.04943 | 0.335248 | 0.460242 |
| BOD1L1    | 4p15.33      | -0.04941 | 0.335511 | 0.460572 |
| PER2      | 2q37.3       | 0.049397 | 0.335604 | 0.460668 |
| KLLN      | 10q23.31     | -0.04939 | 0.335649 | 0.460697 |
| ASNS      | 7q21.3       | 0.04938  | 0.33577  | 0.460832 |
| C1ORF210  | 1p34.2       | -0.04938 | 0.335809 | 0.460854 |
| GNMT      | 6p21.1       | 0.049365 | 0.335918 | 0.460972 |
| ONECUT1   | 15q21.3      | -0.04936 | 0.335972 | 0.461015 |
| ADGRA3    | 4p15.2       | -0.04934 | 0.336151 | 0.461228 |
| HINT1     | 5q23.3       | -0.04931 | 0.336434 | 0.461585 |
| RBM44     | 2q37.3       | 0.049294 | 0.336621 | 0.461785 |
| KPNA3     | 13q14.2      | -0.04929 | 0.336626 | 0.461785 |
| TAS2R31   | 12p13.2      | 0.049262 | 0.336937 | 0.462181 |
| B3GALT5   | 21q22.2      | 0.049233 | 0.337214 | 0.462528 |
| ENTPD4    | 8p21.3       | -0.04921 | 0.337412 | 0.462769 |
| PIK3C2A   | 11p15.1      | -0.04919 | 0.33763  | 0.463037 |
| GPR148    | 2q21.1       | 0.049168 | 0.337856 | 0.463309 |
| SERPINB3  | 18q21.33     | 0.049166 | 0.337876 | 0.463309 |
| WNT8A     | 5q31.2       | -0.04916 | 0.337971 | 0.463409 |
| ZC3H7A    | 16p13.13     | -0.04915 | 0.338065 | 0.463505 |
| TCP10L    | 21q22.11     | -0.04911 | 0.33845  | 0.464001 |
| GPX6      | 6p22.1       | 0.049102 | 0.338505 | 0.464045 |
| SPATA6L   | 9p24.2-p24.1 | 0.049096 | 0.33856  | 0.46409  |
| OPN1LW    | Xq28         | -0.04904 | 0.339123 | 0.464826 |
| MTCL1     | 18p11.22     | 0.049037 | 0.339144 | 0.464826 |
| CRABP1    | 15q25.1      | -0.04903 | 0.33925  | 0.464914 |

|           |          |          |          |          |
|-----------|----------|----------|----------|----------|
| DISC1     | 1q42.2   | -0.04903 | 0.339261 | 0.464914 |
| AAK1      | 2p13.3   | -0.04902 | 0.339279 | 0.464914 |
| SRXN1     | 20p13    | 0.04902  | 0.339314 | 0.464914 |
| NOMO3     | 16p13.11 | 0.049019 | 0.339324 | 0.464914 |
| CYP4F8    | 19p13.12 | 0.049013 | 0.339383 | 0.464963 |
| FRAS1     | 4q21.21  | -0.049   | 0.339467 | 0.464999 |
| PRSS36    | 16p11.2  | -0.049   | 0.339467 | 0.464999 |
| MTUS1     | 8p22     | 0.049002 | 0.33949  | 0.464999 |
| LINC01102 | 2q12.1   | 0.049001 | 0.339503 | 0.464999 |
| ZNF702P   | 19q13.41 | -0.049   | 0.339526 | 0.465    |
| GSR       | 8p12     | 0.048992 | 0.339586 | 0.465049 |
| ZNF282    | 7q36.1   | 0.048983 | 0.339683 | 0.465151 |
| DNPEP     | 2q35     | -0.04896 | 0.339928 | 0.465454 |
| SNORA20   | 6q25.3   | 0.04895  | 0.340007 | 0.465531 |
| KRTAP10-3 | 21q22.3  | -0.04893 | 0.34018  | 0.465711 |
| SORBS3    | 8p21.3   | -0.04893 | 0.340187 | 0.465711 |
| AKR1A1    | 1p34.1   | -0.04893 | 0.340209 | 0.465711 |
| PITX2     | 4q25     | -0.04892 | 0.340253 | 0.465741 |
| ARMH1     | 1p34.1   | 0.048903 | 0.340472 | 0.466008 |
| CACNG5    | 17q24.2  | 0.048897 | 0.340527 | 0.466052 |
| SLC36A4   | 11q21    | -0.04889 | 0.340585 | 0.466078 |
| CLPSL1    | 6p21.31  | -0.04889 | 0.34063  | 0.466078 |
| AHCYL1    | 1p13.3   | 0.048887 | 0.34063  | 0.466078 |
| SLCO1C1   | 12p12.2  | -0.04889 | 0.340639 | 0.466078 |
| MEF2B     | 19p13.11 | 0.048862 | 0.340879 | 0.466374 |
| UBXN8     | 8p12     | 0.048853 | 0.340969 | 0.466465 |
| ATXN3L    | Xp22.2   | -0.04884 | 0.341073 | 0.466576 |
| KRT14     | 17q21.2  | -0.04878 | 0.341667 | 0.467357 |
| SRP68     | 17q25.1  | -0.04877 | 0.34174  | 0.46741  |
| ZNF106    | 15q15.1  | 0.048773 | 0.341753 | 0.46741  |
| RASGRP4   | 19q13.2  | -0.04872 | 0.342267 | 0.468082 |
| GLIS3-AS1 | 9p24.2   | -0.04871 | 0.342332 | 0.468134 |
| SNORA77   | 1q32.1   | 0.048713 | 0.342353 | 0.468134 |
| HPSE      | 4q21.23  | 0.048689 | 0.342588 | 0.468424 |
| LDHA      | 11p15.1  | 0.048685 | 0.34263  | 0.468431 |
| PCDHA1    | 5q31.3   | -0.04868 | 0.34264  | 0.468431 |
| ARID5B    | 10q21.2  | -0.04868 | 0.34272  | 0.468509 |
| GPR151    | 5q32     | -0.04867 | 0.342792 | 0.468575 |
| IGF2BP3   | 7p15.3   | 0.048642 | 0.343059 | 0.468908 |
| FAM138E   | 15q26.3  | 0.048625 | 0.343228 | 0.469082 |
| HIST1H4H  | 6p22.2   | -0.04862 | 0.343233 | 0.469082 |
| NMUR2     | 5q33.1   | 0.048581 | 0.343658 | 0.46963  |
| SCAF8     | 6q25.2   | 0.048562 | 0.34385  | 0.469861 |
| RHAG      | 6p12.3   | -0.04856 | 0.34388  | 0.46987  |
| LRRC34    | 3q26.2   | -0.04856 | 0.34392  | 0.469888 |
| MED4      | 13q14.2  | -0.04855 | 0.34394  | 0.469888 |
| ZNF836    | 19q13.41 | -0.04854 | 0.344021 | 0.469967 |
| EIF2S1    | 14q23.3  | 0.048533 | 0.344135 | 0.47009  |
| CCT8L2    | 22q11.1  | 0.048527 | 0.344195 | 0.47014  |
| ZNF112    | 19q13.31 | 0.048518 | 0.344293 | 0.470242 |
| ACTBL2    | 5q11.2   | -0.04852 | 0.344318 | 0.470243 |
| CETN2     | Xq28     | -0.04851 | 0.344343 | 0.470245 |
| CEP85L    | 6q22.31  | -0.04846 | 0.344904 | 0.470962 |
| HAR1A     | 20q13.33 | 0.048455 | 0.344914 | 0.470962 |
| SMR3B     | 4q13.3   | 0.048399 | 0.345477 | 0.471697 |
| BICD1     | 12p11.21 | -0.04837 | 0.345738 | 0.472022 |
| UGT1A6    | 2q37.1   | -0.04837 | 0.345789 | 0.472059 |
| COL6A6    | 3q22.1   | -0.04836 | 0.345873 | 0.472131 |

|              |          |          |          |          |
|--------------|----------|----------|----------|----------|
| TUT1         | 11q12.3  | 0.048358 | 0.345888 | 0.472131 |
| CA5A         | 16q24.2  | -0.04835 | 0.345994 | 0.472243 |
| AP2M1        | 3q27.1   | -0.04834 | 0.346043 | 0.472278 |
| RBBP4        | 1p35.1   | -0.04834 | 0.346075 | 0.472229 |
| LELP1        | 1q21.3   | -0.04833 | 0.346208 | 0.472438 |
| SMUG1        | 12q13.13 | -0.04832 | 0.346271 | 0.472492 |
| NUDCD1       | 8q23.1   | -0.04831 | 0.346351 | 0.472569 |
| MCPH1        | 8p23.1   | -0.04829 | 0.346533 | 0.472739 |
| SH3BP4       | 2q37.2   | -0.04829 | 0.34654  | 0.472739 |
| ATN1         | 12p13.31 | 0.048292 | 0.346546 | 0.472739 |
| LOC6444669   | 18p11.21 | -0.04828 | 0.346691 | 0.472904 |
| IL5RA        | 3p26.2   | -0.04826 | 0.346898 | 0.473155 |
| MOV10        | 1p13.2   | 0.048246 | 0.347001 | 0.473244 |
| BTN1A1       | 6p22.2   | 0.048245 | 0.347011 | 0.473244 |
| HSBP1        | 16q23.3  | -0.04824 | 0.347093 | 0.473324 |
| SLC35G5      | 8p23.1   | 0.048234 | 0.347128 | 0.473339 |
| CMAS         | 12p12.1  | 0.048213 | 0.34733  | 0.473583 |
| LRRC46       | 17q21.32 | 0.048202 | 0.347441 | 0.473672 |
| RAX          | 18q21.32 | -0.0482  | 0.347443 | 0.473672 |
| MGC12916     | 17p12    | -0.04818 | 0.347696 | 0.473985 |
| AMBN         | 4q13.3   | -0.04816 | 0.347914 | 0.474249 |
| GTF3A        | 13q12.2  | -0.04814 | 0.348115 | 0.474492 |
| ABCC13       | 21q11.2  | 0.048121 | 0.348255 | 0.474649 |
| ZSCAN4       | 19q13.43 | -0.04811 | 0.348354 | 0.474752 |
| OR5K2        | 3q11.2   | -0.0481  | 0.348486 | 0.474899 |
| C10ORF71     | 10q11.23 | 0.048075 | 0.348715 | 0.47518  |
| STARD7       | 2q11.2   | 0.048059 | 0.348874 | 0.475363 |
| JARID2       | 6p22.3   | -0.04806 | 0.348917 | 0.47539  |
| FBXW12       | 3p21.31  | 0.048047 | 0.348998 | 0.475464 |
| ZC3H15       | 2q32.1   | -0.04805 | 0.349018 | 0.475464 |
| REST         | 4q12     | -0.04804 | 0.349057 | 0.475484 |
| LOC341056    | 11q24.1  | 0.048036 | 0.349111 | 0.475526 |
| ZNHIT2       | 11q13.1  | 0.048021 | 0.349257 | 0.475692 |
| GNRHR        | 4q13.2   | 0.048018 | 0.349292 | 0.475692 |
| IFT43        | 14q24.3  | -0.04802 | 0.349305 | 0.475692 |
| VWF          | 12p13.31 | -0.04798 | 0.349635 | 0.476109 |
| GAS2L1       | 22q12.2  | 0.047964 | 0.34983  | 0.476342 |
| C7ORF66      | 7q31.1   | 0.047961 | 0.349862 | 0.476354 |
| LGALS3       | 14q22.3  | 0.047935 | 0.350122 | 0.476667 |
| ACOT6        | 14q24.3  | -0.04793 | 0.35014  | 0.476667 |
| ZNF844       | 19p13.2  | -0.04793 | 0.350189 | 0.476702 |
| HK1          | 10q22.1  | 0.047903 | 0.350447 | 0.477021 |
| CDSN         | 6p21.33  | -0.04786 | 0.35089  | 0.47759  |
| VSIG2        | 11q24.2  | 0.047842 | 0.351063 | 0.477768 |
| ZNF554       | 19p13.3  | 0.047841 | 0.351067 | 0.477768 |
| LRRC4B       | 19q13.33 | -0.04784 | 0.351091 | 0.477768 |
| GOLGA8G      | 15q13.1  | -0.04783 | 0.35118  | 0.477853 |
| KIF3B        | 20q11.21 | -0.04783 | 0.351202 | 0.477853 |
| RGS20        | 8q11.23  | -0.04782 | 0.351285 | 0.477934 |
| N6AMT1       | 21q21.3  | 0.047817 | 0.351315 | 0.477942 |
| ACOT8        | 20q13.12 | -0.0478  | 0.351443 | 0.478084 |
| LINC02418    | 12q24.33 | -0.0478  | 0.351532 | 0.478144 |
| LOC100192426 | 18p11.23 | 0.047795 | 0.351535 | 0.478144 |
| ITPRID2      | 2q31.3   | -0.04779 | 0.351578 | 0.478169 |
| MYH2         | 17p13.1  | -0.04778 | 0.35164  | 0.478222 |
| GSTT4        | 22q11.23 | 0.047772 | 0.351772 | 0.47836  |
| LTBR         | 12p13.31 | -0.04777 | 0.351801 | 0.47836  |
| SMN1         | 5q13.2   | -0.04777 | 0.351813 | 0.47836  |

|           |             |          |          |          |
|-----------|-------------|----------|----------|----------|
| GTF2I     | 7q11.23     | -0.04776 | 0.351882 | 0.478421 |
| OPALIN    | 10q24.1     | -0.04773 | 0.352145 | 0.478746 |
| C1ORF115  | 1q41        | -0.04773 | 0.352203 | 0.478793 |
| CHORDC1   | 11q14.3     | 0.047723 | 0.35226  | 0.478805 |
| KRTAP4-12 | 17q21.2     | -0.04772 | 0.35226  | 0.478805 |
| NSG1      | 4p16.3      | -0.04769 | 0.35256  | 0.479179 |
| LRIT1     | 10q23.1     | 0.047691 | 0.352588 | 0.479179 |
| OR2B11    | 1q44        | 0.047689 | 0.352607 | 0.479179 |
| KDELR2    | 7p22.1      | 0.04768  | 0.352699 | 0.479272 |
| SYNE3     | 14q32.13    | 0.047651 | 0.352994 | 0.47964  |
| LMBRD2    | 5p13.2      | -0.04764 | 0.353107 | 0.47976  |
| ATP7B     | 13q14.3     | 0.047611 | 0.353399 | 0.480124 |
| RARG      | 12q13.13    | -0.04759 | 0.353558 | 0.480308 |
| TESMIN    | 11q13.3     | 0.047589 | 0.353621 | 0.480361 |
| S100A7    | 1q21.3      | -0.04758 | 0.353685 | 0.480411 |
| CCNB1IP1  | 14q11.2     | -0.04758 | 0.353706 | 0.480411 |
| POTED     | 21q11.2     | 0.047577 | 0.353734 | 0.480417 |
| GPR32     | 19q13.33    | 0.047574 | 0.353766 | 0.480428 |
| CBX1      | 17q21.32    | -0.04757 | 0.353813 | 0.480459 |
| NEURL1B   | 5q35.1      | 0.047554 | 0.353968 | 0.480637 |
| PADI4     | 1p36.13     | -0.04755 | 0.354035 | 0.480695 |
| TBX4      | 17q23.2     | -0.04754 | 0.354126 | 0.480761 |
| TMEM91    | 19q13.2     | -0.04754 | 0.354131 | 0.480761 |
| SNORA14A  | 7q11.23     | -0.04753 | 0.354262 | 0.480906 |
| CDPF1     | 22q13.31    | -0.04751 | 0.354371 | 0.481022 |
| OCA2      | 15q12-q13.1 | -0.04751 | 0.35444  | 0.481057 |
| ZNF543    | 19q13.43    | 0.047507 | 0.354445 | 0.481057 |
| GTF2IRD1  | 7q11.23     | 0.047474 | 0.35478  | 0.481478 |
| SNRPG     | 2p13.3      | 0.04747  | 0.354823 | 0.481505 |
| CDADC1    | 13q14.2     | -0.04746 | 0.354917 | 0.481599 |
| ENAH      | 1q42.12     | -0.04745 | 0.355072 | 0.481777 |
| PPP2R5C   | 14q32.31    | -0.04743 | 0.355249 | 0.481985 |
| ALKBH4    | 7q22.1      | -0.0474  | 0.355547 | 0.482356 |
| SLC50A1   | 1q22        | 0.047369 | 0.355853 | 0.482739 |
| ZFAND2A   | 7p22.3      | -0.04736 | 0.355982 | 0.482881 |
| KRTAP4-11 | 17q21.2     | 0.04733  | 0.356242 | 0.483183 |
| DMRT1     | 9p24.3      | -0.04733 | 0.356253 | 0.483183 |
| TEX9      | 15q21.3     | -0.0473  | 0.356597 | 0.483616 |
| SPRY2     | 13q31.1     | -0.04728 | 0.356773 | 0.483823 |
| DYRK1A    | 21q22.13    | 0.047268 | 0.35688  | 0.483913 |
| ZNRF2P1   | 7p14.3      | 0.047267 | 0.356888 | 0.483913 |
| UNC119B   | 12q24.31    | -0.04724 | 0.35717  | 0.484263 |
| MYF5      | 12q21.31    | -0.04722 | 0.357323 | 0.484438 |
| ASB4      | 7q21.3      | -0.04721 | 0.357454 | 0.484563 |
| RPS4Y2    | Yq11.223    | 0.04721  | 0.357464 | 0.484563 |
| MARVELD3  | 16q22.2     | 0.047198 | 0.357587 | 0.484665 |
| RP1L1     | 8p23.1      | 0.047198 | 0.357588 | 0.484665 |
| HAO2      | 1p12        | -0.04719 | 0.357711 | 0.484769 |
| PAQR9     | 3q23        | -0.04719 | 0.357713 | 0.484769 |
| RNF114    | 20q13.13    | -0.04715 | 0.358112 | 0.485259 |
| CTC1      | 17p13.1     | 0.047146 | 0.358123 | 0.485259 |
| SYNGR3    | 16p13.3     | -0.04714 | 0.35817  | 0.48529  |
| KIF16B    | 20p12.1     | -0.04713 | 0.358277 | 0.485402 |
| OPN1MW    | Xq28        | -0.04712 | 0.358337 | 0.485451 |
| TRMT12    | 8q24.13     | -0.04711 | 0.358439 | 0.485528 |
| WT1       | 11p13       | -0.04711 | 0.358443 | 0.485528 |
| INO80C    | 18q12.2     | 0.04711  | 0.358488 | 0.485556 |
| ATP5MG    | 11q23.3     | -0.0471  | 0.35854  | 0.485595 |

|           |               |          |          |          |
|-----------|---------------|----------|----------|----------|
| INPP4A    | 2q11.2        | -0.0471  | 0.358591 | 0.48563  |
| RMST      | 12q23.1 12q21 | -0.04709 | 0.35866  | 0.485671 |
| OR6T1     | 11q24.1       | -0.04709 | 0.358669 | 0.485671 |
| STIM2     | 4p15.2        | 0.047078 | 0.358813 | 0.48583  |
| DTX4      | 11q12.1       | 0.047076 | 0.358835 | 0.48583  |
| HNRNPCL2  | 1p36.21       | -0.04706 | 0.35903  | 0.486039 |
| MLN       | 6p21.31       | -0.04705 | 0.359119 | 0.486039 |
| CADPS2    | 7q31.32       | -0.04705 | 0.359123 | 0.486039 |
| HIST1H2BB | 6p22.2        | 0.047048 | 0.359127 | 0.486039 |
| RNU11     | 1p35.3        | 0.047046 | 0.359139 | 0.486039 |
| RBSN      | 3p25.1        | 0.047045 | 0.359154 | 0.486039 |
| ABCA13    | 7p12.3        | -0.04704 | 0.35916  | 0.486039 |
| SGMS2     | 4q25          | -0.04703 | 0.359289 | 0.486181 |
| MTMR14    | 3p25.3        | -0.04701 | 0.359542 | 0.48649  |
| FBP2      | 9q22.32       | 0.047001 | 0.3596   | 0.486537 |
| DCAF4L2   | 8q21.3        | 0.046995 | 0.359666 | 0.486593 |
| PYCR1     | 17q25.3       | 0.046974 | 0.359875 | 0.4868   |
| WDR89     | 14q23.2       | -0.04697 | 0.359897 | 0.4868   |
| USP29     | 19q13.43      | -0.04697 | 0.359913 | 0.4868   |
| CTLA4     | 2q33.2        | -0.04697 | 0.359916 | 0.4868   |
| HMX2      | 10q26.13      | 0.046958 | 0.360046 | 0.486942 |
| OR10K1    | 1q23.1        | -0.04692 | 0.360457 | 0.487465 |
| PRLHR     | 10q26.11      | -0.04691 | 0.360565 | 0.487545 |
| BAX       | 19q13.33      | 0.046907 | 0.360565 | 0.487545 |
| TIMM22    | 17p13.3       | -0.0469  | 0.360622 | 0.487586 |
| RLN3      | 19p13.12      | -0.0469  | 0.360644 | 0.487586 |
| UMODL1    | 21q22.3       | -0.04688 | 0.360805 | 0.487771 |
| PCGF2     | 17q12         | -0.04688 | 0.360867 | 0.487811 |
| CDKL2     | 4q21.1        | -0.04688 | 0.360884 | 0.487811 |
| PVALEF    | 17q25.3       | 0.046841 | 0.361245 | 0.488267 |
| LCE6A     | 1q21.3        | -0.04683 | 0.36136  | 0.488389 |
| HNF1A     | 12q24.31      | 0.046818 | 0.361481 | 0.488521 |
| PGC       | 6p21.1        | 0.046804 | 0.361619 | 0.488674 |
| DSG2      | 18q12.1       | -0.0468  | 0.361678 | 0.488721 |
| SNORA37   | 18q21.2       | -0.04678 | 0.361899 | 0.488986 |
| FERMT1    | 20p12.3       | -0.04676 | 0.362052 | 0.48916  |
| RER1      | 1p36.32       | 0.046749 | 0.362185 | 0.489306 |
| OR5P3     | 11p15.4       | 0.046736 | 0.362322 | 0.489458 |
| PREB      | 2p23.3        | -0.04671 | 0.362556 | 0.489742 |
| WDCP      | 2p23.3        | -0.04669 | 0.362754 | 0.489952 |
| TAS2R16   | 7q31.32 7q31  | -0.04669 | 0.362785 | 0.489952 |
| OR4K17    | 14q11.2       | -0.04669 | 0.362785 | 0.489952 |
| HLA-J     | 6p22.1        | 0.046685 | 0.362847 | 0.490002 |
| MTNR1A    | 4q35.2        | 0.046675 | 0.362949 | 0.490107 |
| PTPN2     | 18p11.21      | -0.04666 | 0.363064 | 0.490229 |
| EIF2B1    | 12q24.31      | 0.046656 | 0.363144 | 0.490276 |
| SNORA2C   | 12q13.11      | 0.046656 | 0.363147 | 0.490276 |
| TIPRL     | 1q24.2        | 0.046652 | 0.36319  | 0.490276 |
| FAM24A    | 10q26.13      | 0.046651 | 0.363196 | 0.490276 |
| VSTM2A    | 7p11.2        | -0.04664 | 0.363282 | 0.490359 |
| ZBTB2     | 6q25.1        | 0.046616 | 0.363552 | 0.490677 |
| BGLAP     | 1q22          | -0.04661 | 0.363567 | 0.490677 |
| IL13RA2   | Xq23          | 0.04661  | 0.363623 | 0.490719 |
| CFAP69    | 7q21.13       | 0.046601 | 0.363716 | 0.490812 |
| HBB       | 11p15.4       | -0.0466  | 0.363743 | 0.490816 |
| NME3      | 16p13.3       | -0.04657 | 0.364073 | 0.491228 |
| ADAT1     | 16q23.1       | 0.046557 | 0.364162 | 0.491314 |
| MLF1      | 3q25.32       | -0.04655 | 0.364193 | 0.491323 |

|              |                |          |          |          |
|--------------|----------------|----------|----------|----------|
| VSIG1        | Xq22.3         | -0.04654 | 0.364356 | 0.4915   |
| MAP4K4       | 2q11.2         | -0.04654 | 0.364373 | 0.4915   |
| SNAPC2       | 19p13.2        | -0.04653 | 0.364466 | 0.491592 |
| OR6C68       | 12q13.2        | 0.046516 | 0.364584 | 0.491695 |
| KRTAP12-1    | 21q22.3        | 0.046516 | 0.364591 | 0.491695 |
| BTBD18       | 11q12.1        | 0.046511 | 0.364638 | 0.491725 |
| CAPRIN1      | 11p13          | -0.04651 | 0.364666 | 0.49173  |
| CHD8         | 14q11.2        | 0.046501 | 0.364742 | 0.491754 |
| SLC46A2      | 9q32           | 0.046498 | 0.364768 | 0.491754 |
| NPEPPS       | 17q21.32       | -0.04649 | 0.364806 | 0.491754 |
| CCL13        | 17q12          | -0.04649 | 0.364824 | 0.491754 |
| ZNF408       | 11p11.2        | 0.046492 | 0.364837 | 0.491754 |
| SLITRK6      | 13q31.1        | -0.04649 | 0.364847 | 0.491754 |
| SNAPIN       | 1q21.3         | -0.04649 | 0.364856 | 0.491754 |
| TMEM170B     | 6p24.2         | -0.04648 | 0.364924 | 0.491812 |
| IQCD         | 12q24.13       | 0.046481 | 0.364951 | 0.491815 |
| ZC3H6        | 2q14.1         | -0.04647 | 0.365046 | 0.491911 |
| LEMD1        | 1q32.1         | 0.046469 | 0.365072 | 0.491913 |
| SCARF1       | 17p13.3        | -0.04645 | 0.365275 | 0.492153 |
| HAUS2        | 15q15.2        | 0.046441 | 0.365364 | 0.49224  |
| PRSS45P      | 3p21.31        | -0.04643 | 0.365475 | 0.492357 |
| PLD1         | 3q26.31        | -0.04642 | 0.365536 | 0.492405 |
| OTUD6B       | 8q21.3         | 0.04642  | 0.365578 | 0.492429 |
| OASL         | 12q24.31       | 0.046412 | 0.365662 | 0.492509 |
| TDG          | 12q23.3        | 0.046408 | 0.365705 | 0.492533 |
| MGME1        | 20p11.23       | 0.046399 | 0.365792 | 0.492617 |
| C20ORF27     | 20p13          | 0.046391 | 0.365883 | 0.492707 |
| SERPINE3     | 13q14.3        | 0.046386 | 0.365933 | 0.492741 |
| RNF217       | 6q22.31        | -0.04638 | 0.366008 | 0.492809 |
| COL4A3       | 2q36.3         | -0.04636 | 0.36619  | 0.493021 |
| ACPP         | 3q22.1         | 0.046337 | 0.366439 | 0.493323 |
| IFNA8        | 9p21.3         | -0.04633 | 0.366528 | 0.49341  |
| LOC285847    | 6p21.31        | 0.046322 | 0.366591 | 0.493462 |
| THNSL1       | 10p12.1        | -0.04631 | 0.36667  | 0.493501 |
| FAM71A       | 1q32.3         | 0.046314 | 0.366673 | 0.493501 |
| CEACAM1      | 19q13.2        | -0.04631 | 0.366694 | 0.493501 |
| ERICH1       | 8p23.3         | 0.046293 | 0.366897 | 0.493741 |
| FBXO30       | 6q24.3         | -0.04629 | 0.366948 | 0.493776 |
| LCLAT1       | 2p23.1         | 0.046274 | 0.367087 | 0.493929 |
| OR6F1        | 1q44           | 0.046271 | 0.367126 | 0.493949 |
| ARF6         | 14q21.3        | 0.046254 | 0.367296 | 0.494145 |
| BTBD2        | 19p13.3        | 0.046243 | 0.367408 | 0.494232 |
| IFNA10       | 9p21.3         | 0.046243 | 0.367411 | 0.494232 |
| CTRB1        | 16q23.1        | -0.04623 | 0.367505 | 0.494326 |
| TIAM2        | 6q25.2-q25.3   | 0.046231 | 0.36754  | 0.49434  |
| SMCR8        | 17p11.2        | -0.04622 | 0.367656 | 0.494408 |
| KRTAP12-3    | 21q22.3        | 0.046219 | 0.367661 | 0.494408 |
| NEK9         | 14q24.3        | -0.04622 | 0.367665 | 0.494408 |
| NXPE2        | 11q23.2-q23.3  | -0.04621 | 0.367775 | 0.494523 |
| ZSCAN32      | 16p13.3        | -0.04618 | 0.368038 | 0.494844 |
| LOC100132831 | Xp11.4         | -0.04617 | 0.36815  | 0.494961 |
| TOMM20L      | 14q23.1        | -0.04616 | 0.368305 | 0.495136 |
| IGFN1        | 1q32.1         | -0.04615 | 0.368416 | 0.495252 |
| UFSP1        | 7q22.1         | -0.04614 | 0.36844  | 0.495252 |
| SETX         | 9q34.13        | 0.04612  | 0.368691 | 0.495555 |
| CECR2        | 22q11.1-q11.21 | -0.0461  | 0.368871 | 0.495751 |
| PHF14        | 7p21.3         | -0.0461  | 0.368886 | 0.495751 |
| ATP2B1       | 12q21.33       | 0.046084 | 0.369067 | 0.49594  |



|                |          |          |          |          |
|----------------|----------|----------|----------|----------|
| C15ORF41       | 15q14    | -0.04608 | 0.369076 | 0.49594  |
| HMOX2          | 16p13.3  | 0.046078 | 0.369125 | 0.495953 |
| C10ORF62       | 10q24.2  | -0.04608 | 0.369136 | 0.495953 |
| PHC2           | 1p35.1   | -0.04607 | 0.369235 | 0.496047 |
| LRFN1          | 19q13.2  | -0.04607 | 0.369255 | 0.496047 |
| FOS            | 14q24.3  | 0.046057 | 0.36934  | 0.496128 |
| OR4X2          | 11p11.2  | 0.046049 | 0.36943  | 0.496216 |
| NT5DC1         | 6q22.1   | -0.04604 | 0.369493 | 0.496266 |
| PDXP           | 22q13.1  | 0.046038 | 0.369541 | 0.496298 |
| ARFGEF2        | 20q13.13 | -0.04602 | 0.369685 | 0.496425 |
| BPIFC          | 22q12.3  | -0.04602 | 0.369703 | 0.496425 |
| SLC25A11       | 17p13.2  | -0.04602 | 0.36971  | 0.496425 |
| C12ORF65       | 12q24.31 | 0.04601  | 0.369831 | 0.496554 |
| OCLNP1         | 5q13.2   | -0.046   | 0.369948 | 0.496678 |
| FAM53C         | 5q31.2   | -0.04599 | 0.370013 | 0.496732 |
| HYLS1          | 11q24.2  | 0.04599  | 0.370044 | 0.496741 |
| VSIG10L        | 19q13.41 | -0.04596 | 0.370323 | 0.497082 |
| GKAP1          | 9q21.32  | -0.04595 | 0.370451 | 0.49722  |
| LRRC8E         | 19p13.2  | 0.04591  | 0.370877 | 0.497758 |
| KRT26          | 17q21.2  | -0.04589 | 0.371058 | 0.497942 |
| HIVEP1         | 6p24.1   | 0.045892 | 0.371063 | 0.497942 |
| ASAP1-IT1      | 8q24.21  | -0.04587 | 0.371245 | 0.498152 |
| PCDH8          | 13q14.3  | -0.04585 | 0.371461 | 0.498408 |
| METTL8         | 2q31.1   | -0.04585 | 0.371526 | 0.498463 |
| TMEM106A       | 17q21.31 | -0.04582 | 0.371812 | 0.498812 |
| TRPM1          | 15q13.3  | -0.04579 | 0.372165 | 0.499253 |
| CCNH           | 5q14.3   | -0.04578 | 0.372212 | 0.499283 |
| TMEM189-UBE2V1 | 20q13.13 | 0.045778 | 0.37225  | 0.4993   |
| UNC119         | 17q11.2  | -0.04573 | 0.372725 | 0.499898 |
| AVL9           | 7p14.3   | -0.04573 | 0.372746 | 0.499898 |
| ARPC5          | 1q25.3   | 0.045699 | 0.373084 | 0.500318 |
| RHBG           | 1q22     | 0.045685 | 0.373228 | 0.500478 |
| TRADD          | 16q22.1  | 0.045673 | 0.373356 | 0.500617 |
| CCDC120        | Xp11.23  | 0.045668 | 0.373411 | 0.50064  |
| PAFAH1B2       | 11q23.3  | -0.04567 | 0.373424 | 0.50064  |
| SKIL           | 3q26.2   | -0.04565 | 0.37355  | 0.500776 |
| RBMX2          | Xq26.1   | -0.04565 | 0.373576 | 0.500777 |
| SNAR-G1        | 19q13.33 | 0.045593 | 0.374193 | 0.50157  |
| PRAC1          | 17q21.32 | -0.04559 | 0.374229 | 0.501585 |
| ALPK3          | 15q25.3  | -0.04558 | 0.374304 | 0.501652 |
| PBX3           | 9q33.3   | -0.04558 | 0.37434  | 0.501667 |
| WDR87          | 19q13.13 | 0.045566 | 0.374479 | 0.501819 |
| DDR1           | 6p21.33  | 0.04556  | 0.374537 | 0.501864 |
| SACM1L         | 3p21.31  | -0.04556 | 0.374569 | 0.501872 |
| CARS           | 11p15.4  | 0.045552 | 0.374618 | 0.501905 |
| LINC02209      | 8p12     | 0.045549 | 0.374654 | 0.501919 |
| BEST1          | 11q12.3  | -0.04554 | 0.37476  | 0.50201  |
| SOWAHB         | 4q21.1   | -0.04554 | 0.374788 | 0.50201  |
| FGF11          | 17p13.1  | -0.04553 | 0.374801 | 0.50201  |
| SMARCA2        | 9p24.3   | -0.04553 | 0.374822 | 0.50201  |
| CYLC2          | 9q31.1   | -0.04551 | 0.375059 | 0.502288 |
| CIAPIN1        | 16q21    | 0.045508 | 0.375079 | 0.502288 |
| C1ORF53        | 1q31.3   | -0.04549 | 0.375245 | 0.502475 |
| TOMM34         | 20q13.12 | 0.045479 | 0.375392 | 0.502634 |
| ZNF93          | 19p12    | 0.045476 | 0.375423 | 0.502634 |
| ZFP69          | 1p34.2   | 0.045474 | 0.375438 | 0.502634 |
| SGMS1          | 10q11.23 | -0.04547 | 0.375527 | 0.50272  |
| MMP27          | 11q22.2  | -0.04545 | 0.375656 | 0.502813 |

|           |               |          |          |          |
|-----------|---------------|----------|----------|----------|
| KAT6B     | 10q22.2       | 0.045453 | 0.375665 | 0.502813 |
| UBL4B     | 1p13.3        | -0.04545 | 0.375672 | 0.502813 |
| LINC01226 | 1p35.2        | 0.045438 | 0.375822 | 0.502979 |
| SPATA31E1 | 9q22.1        | -0.04543 | 0.375908 | 0.503061 |
| SMC1B     | 22q13.31      | 0.045424 | 0.375963 | 0.503101 |
| RIOK3     | 18q11.2       | -0.04542 | 0.376012 | 0.503133 |
| MOGS      | 2p13.1        | 0.0454   | 0.376216 | 0.503369 |
| CIAO1     | 2q11.2        | -0.0454  | 0.376238 | 0.503369 |
| FOXB1     | 15q22.2       | -0.04538 | 0.376381 | 0.503526 |
| C8ORF76   | 8q24.13       | -0.04537 | 0.376531 | 0.503659 |
| PRDM5     | 4q27          | -0.04537 | 0.376533 | 0.503659 |
| BNIP5     | 6p21.31       | 0.045368 | 0.376556 | 0.503659 |
| DUOX2     | 15q21.1       | 0.04534  | 0.37685  | 0.504019 |
| LDB1      | 10q24.32      | -0.04533 | 0.376918 | 0.504077 |
| TIPARP    | 3q25.31       | -0.04532 | 0.377066 | 0.50424  |
| DOK4      | 16q21         | 0.045313 | 0.377134 | 0.504297 |
| FAM78B    | 1q24.1        | -0.04531 | 0.377165 | 0.504305 |
| RBM12     | 20q11.22      | -0.0453  | 0.377259 | 0.504397 |
| EIF2AK4   | 15q15.1       | -0.04529 | 0.377372 | 0.504515 |
| EZH1      | 17q21.2       | 0.045281 | 0.377477 | 0.504621 |
| ZNF347    | 19q13.42      | -0.04528 | 0.377528 | 0.504655 |
| PLA2G2C   | 1p36.12       | 0.045256 | 0.377734 | 0.504856 |
| LRRD1     | 7q21.2        | 0.045255 | 0.377745 | 0.504856 |
| BACE2     | 21q22.2-q22.3 | 0.045253 | 0.377767 | 0.504856 |
| C1ORF116  | 1q32.1        | 0.045252 | 0.377779 | 0.504856 |
| KRTAP11-1 | 21q22.11      | -0.04524 | 0.37794  | 0.505019 |
| LINC00494 | 20q13.13      | -0.04524 | 0.377951 | 0.505019 |
| MRPS21    | 1q21.2        | 0.045223 | 0.378081 | 0.505131 |
| SYNJ1     | 21q22.11      | 0.045222 | 0.378092 | 0.505131 |
| RTKN      | 2p13.1        | 0.045221 | 0.37811  | 0.505131 |
| PADI6     | 1p36.13       | 0.045206 | 0.378261 | 0.505299 |
| TMEM104   | 17q25.1       | -0.04519 | 0.378388 | 0.505431 |
| SIGLEC1   | 20p13         | -0.04519 | 0.37841  | 0.505431 |
| IFFO2     | 1p36.13       | 0.045187 | 0.37847  | 0.505476 |
| FAM3D     | 3p14.2        | -0.04517 | 0.378656 | 0.505664 |
| GNAQ      | 9q21.2        | 0.045169 | 0.378661 | 0.505664 |
| PTH       | 11p15.3       | -0.04516 | 0.378761 | 0.505763 |
| ABCF2     | 7q36.1        | 0.045144 | 0.378922 | 0.505945 |
| ARG1      | 6q23.2        | -0.04514 | 0.379012 | 0.506032 |
| NUBP1     | 16p13.13      | 0.045105 | 0.37933  | 0.506422 |
| ZNF572    | 8q24.13       | -0.04509 | 0.379524 | 0.506594 |
| MTCH1     | 6p21.2        | 0.045087 | 0.379526 | 0.506594 |
| DCP1A     | 3p21.1        | 0.045083 | 0.37956  | 0.506594 |
| KDM3A     | 2p11.2        | -0.04508 | 0.37956  | 0.506594 |
| ACTR1B    | 2q11.2        | -0.04508 | 0.379603 | 0.506605 |
| CHST4     | 16q22.2       | -0.04508 | 0.379619 | 0.506605 |
| LAMA3     | 18q11.2       | -0.04507 | 0.379708 | 0.50669  |
| FAM185A   | 7q22.1        | 0.045058 | 0.379827 | 0.506811 |
| SWI5      | 9q34.11       | -0.04505 | 0.379867 | 0.506811 |
| KSR1      | 17q11.2       | 0.045054 | 0.379874 | 0.506811 |
| ZNF548    | 19q13.43      | -0.04502 | 0.380241 | 0.507267 |
| DSCR8     | 21q22.13      | -0.04501 | 0.380305 | 0.507318 |
| PLA2G4E   | 15q15.1       | -0.04501 | 0.380338 | 0.507329 |
| ERC2-IT1  | 3p14.3        | 0.045004 | 0.380402 | 0.507381 |
| TMPRSS5   | 11q23.2       | -0.045   | 0.380474 | 0.507442 |
| NANOS2    | 19q13.32      | 0.044991 | 0.380536 | 0.507492 |
| TMEM207   | 3q28          | 0.044967 | 0.38079  | 0.507796 |
| LOC652276 | 16p13.3       | -0.04496 | 0.380887 | 0.507891 |

|           |          |          |          |          |
|-----------|----------|----------|----------|----------|
| LOC644936 | 5q14.1   | -0.04495 | 0.380981 | 0.507982 |
| SS18      | 18q11.2  | 0.044946 | 0.381017 | 0.507997 |
| GDPD4     | 11q13.5  | -0.04493 | 0.381188 | 0.508192 |
| LRRK1     | 15q26.3  | 0.044908 | 0.381419 | 0.508466 |
| TRIB2     | 2p24.3   | -0.0449  | 0.381499 | 0.508538 |
| DISP3     | 1p36.22  | -0.04489 | 0.381652 | 0.508708 |
| ERCC6L2   | 9q22.32  | -0.04487 | 0.381842 | 0.50891  |
| GUSBP3    | 5q13.2   | 0.044867 | 0.381854 | 0.50891  |
| LINC00200 | 10p15.3  | 0.044855 | 0.381986 | 0.509052 |
| ABLIM2    | 4p16.1   | -0.04484 | 0.382173 | 0.509268 |
| CEMIP2    | 9q21.13  | 0.044831 | 0.382233 | 0.509282 |
| FAM135A   | 6q13     | 0.044831 | 0.382235 | 0.509282 |
| MAATS1    | 3q13.33  | -0.04483 | 0.382287 | 0.509317 |
| PACSIN2   | 22q13.2  | 0.044781 | 0.382764 | 0.509919 |
| ZBTB41    | 1q31.3   | -0.04477 | 0.382862 | 0.509994 |
| FLVCR1-DT | 1q32.3   | -0.04477 | 0.382897 | 0.509994 |
| LHX5      | 12q24.13 | -0.04477 | 0.3829   | 0.509994 |
| SLN       | 11q22.3  | -0.04477 | 0.382922 | 0.509994 |
| TEX264    | 3p21.2   | -0.04476 | 0.383043 | 0.510122 |
| PYGB      | 20p11.21 | 0.044746 | 0.383142 | 0.510219 |
| DCAKD     | 17q21.31 | -0.04471 | 0.38357  | 0.510756 |
| HOXC6     | 12q13.13 | -0.04469 | 0.383691 | 0.510882 |
| ZMYM3     | Xq13.1   | 0.04469  | 0.383733 | 0.510904 |
| ZAP70     | 2q11.2   | -0.04468 | 0.383811 | 0.510974 |
| LOC407835 | 7q32.1   | 0.044656 | 0.384096 | 0.511319 |
| ZCCHC3    | 20p13    | -0.04464 | 0.384247 | 0.511487 |
| FAM86C1   | 11q13.4  | -0.04464 | 0.384286 | 0.511505 |
| HOXA1     | 7p15.2   | -0.04461 | 0.384634 | 0.511933 |
| SLC35F2   | 11q22.3  | 0.044594 | 0.384757 | 0.512063 |
| SLC26A10  | 12q13.3  | -0.04458 | 0.38487  | 0.51218  |
| ALDH3A1   | 17p11.2  | 0.04457  | 0.385014 | 0.512337 |
| EN1       | 2q14.2   | -0.04457 | 0.385061 | 0.512365 |
| OR4F5     | 1p36.33  | -0.04455 | 0.3852   | 0.512517 |
| OR2W1     | 6p22.1   | 0.04453  | 0.385449 | 0.512813 |
| CTSL3P    | 9q21.33  | -0.04453 | 0.385486 | 0.512828 |
| PLCG1     | 20q12    | 0.044521 | 0.385545 | 0.512874 |
| SLC35E4   | 22q12.2  | 0.044517 | 0.385586 | 0.512895 |
| ERMARD    | 6q27     | 0.044509 | 0.385669 | 0.512971 |
| TBX3      | 12q24.21 | 0.044498 | 0.385784 | 0.51309  |
| AREL1     | 14q24.3  | 0.044485 | 0.385922 | 0.513239 |
| PLCB2     | 15q15.1  | 0.04448  | 0.385973 | 0.513272 |
| NLRC3     | 16p13.3  | -0.04448 | 0.386005 | 0.513281 |
| TTPAL     | 20q13.12 | -0.04447 | 0.386051 | 0.513308 |
| SPRR1A    | 1q21.3   | -0.04446 | 0.386221 | 0.5135   |
| IL36G     | 2q14.1   | 0.044452 | 0.38628  | 0.513532 |
| UGT2B4    | 4q13.3   | -0.04445 | 0.386296 | 0.513532 |
| FAM43A    | 3q29     | -0.04444 | 0.386394 | 0.513628 |
| ZNF17     | 19q13.43 | -0.04442 | 0.386567 | 0.513808 |
| CAMK2D    | 4q26     | -0.04442 | 0.386581 | 0.513808 |
| EPN2      | 17p11.2  | -0.0444  | 0.386781 | 0.51404  |
| LCN1      | 9q34.3   | -0.0444  | 0.386873 | 0.514128 |
| PCK1      | 20q13.31 | -0.04439 | 0.386899 | 0.514128 |
| TERB2     | 15q21.1  | 0.044389 | 0.386954 | 0.514167 |
| OR5B17    | 11q12.1  | 0.044368 | 0.387177 | 0.514429 |
| ZNF586    | 19q13.43 | 0.044364 | 0.387222 | 0.514454 |
| PNLIPRP1  | 10q25.3  | 0.044359 | 0.387268 | 0.514482 |
| SAMHD1    | 20q11.23 | -0.04434 | 0.387425 | 0.514628 |
| PSMD8     | 19q13.2  | 0.044344 | 0.387429 | 0.514628 |

|             |                |          |          |          |
|-------------|----------------|----------|----------|----------|
| VENTXP7     | 3p24.3         | -0.04433 | 0.387584 | 0.514775 |
| SLC15A1     | 13q32.2-q32.3  | -0.04433 | 0.387594 | 0.514775 |
| WDR53       | 3q29           | 0.044326 | 0.38763  | 0.514775 |
| EIF1AD      | 11q13.1        | -0.04432 | 0.387642 | 0.514775 |
| OR1E1       | 17p13.3        | -0.04432 | 0.387725 | 0.51485  |
| ITGB4       | 17q25.1        | 0.044309 | 0.387808 | 0.514925 |
| LOC400710   | 19q13.33       | 0.044301 | 0.387894 | 0.515007 |
| CCL15       | 17q12          | -0.0443  | 0.387923 | 0.51501  |
| ARL17B      | 17q21.31       | 0.044293 | 0.387976 | 0.515046 |
| ZNF284      | 19q13.31       | 0.044286 | 0.388057 | 0.515074 |
| PSMC5       | 17q23.3        | 0.044285 | 0.388068 | 0.515074 |
| PPP2CA      | 5q31.1         | -0.04428 | 0.388112 | 0.515074 |
| ASB11       | Xp22.2         | 0.044279 | 0.388129 | 0.515074 |
| DICER1      | 14q32.13       | 0.044278 | 0.388145 | 0.515074 |
| CASP14      | 19p13.12       | -0.04428 | 0.388151 | 0.515074 |
| GGT1        | 22q11.23       | -0.04426 | 0.388339 | 0.515289 |
| NFIX        | 19p13.13       | 0.044257 | 0.388371 | 0.515298 |
| TTY15       | Yq11.221       | -0.04425 | 0.388476 | 0.515403 |
| GCNT1       | 9q21.13        | 0.044243 | 0.388512 | 0.515416 |
| CUTC        | 10q24.2        | -0.04423 | 0.388616 | 0.51552  |
| GRM3        | 7q21.11-q21.12 | -0.04423 | 0.388687 | 0.515565 |
| LY6G6C      | 6p21.33        | 0.044226 | 0.388701 | 0.515565 |
| DNAJC19     | 3q26.33        | -0.04421 | 0.388832 | 0.515704 |
| CYSTM1      | 5q31.3         | 0.044184 | 0.389145 | 0.516086 |
| MYADML      | 2p22.3         | -0.04417 | 0.389249 | 0.516189 |
| DENR        | 12q24.31       | -0.04417 | 0.389291 | 0.516192 |
| GOLGA8CP    | 15q11.2        | -0.04417 | 0.389303 | 0.516192 |
| TWISTNB     | 7p21.1         | -0.04416 | 0.389372 | 0.51625  |
| NKX2-1      | 14q13.3        | -0.04415 | 0.389545 | 0.516444 |
| CNPY3       | 6p21.1         | 0.044131 | 0.389717 | 0.516638 |
| ZNF770      | 15q14          | 0.044126 | 0.389779 | 0.51664  |
| DLEU7       | 13q14.3        | -0.04413 | 0.389784 | 0.51664  |
| CD2BP2      | 16p11.2        | -0.04412 | 0.389795 | 0.51664  |
| B4GAT1      | 11q13.2        | -0.04412 | 0.389846 | 0.516674 |
| GNGT1       | 7q21.3         | -0.04411 | 0.389923 | 0.516741 |
| HDLBP       | 2q37.3         | 0.044102 | 0.390029 | 0.51682  |
| CCDC74A     | 2q21.1         | 0.044102 | 0.390034 | 0.51682  |
| ARHGAP17    | 16p12.1        | -0.04409 | 0.390117 | 0.516896 |
| KRTAP2-2    | 17q21.2        | -0.04405 | 0.390588 | 0.517485 |
| LINC00051   | 8q24.3         | 0.044042 | 0.390679 | 0.517572 |
| KAT14       | 20p11.23       | -0.04401 | 0.391021 | 0.517991 |
| FDXR        | 17q25.1        | -0.044   | 0.391091 | 0.51803  |
| VCX         | Xp22.31        | 0.044003 | 0.391103 | 0.51803  |
| SPERT       | 13q14.13       | -0.04398 | 0.391305 | 0.518264 |
| ATP2C1      | 3q22.1         | 0.043979 | 0.391355 | 0.518296 |
| MARVELD2    | 5q13.2         | 0.043926 | 0.391924 | 0.519015 |
| PPP2R5E     | 14q23.2        | -0.04389 | 0.392324 | 0.51951  |
| FAM168B     | 2q21.1         | -0.04389 | 0.392367 | 0.519533 |
| EIF2S2      | 20q11.22       | -0.04387 | 0.392484 | 0.519654 |
| KHK         | 2p23.3         | 0.043854 | 0.392701 | 0.519887 |
| SLCO4A1-AS1 | 20q13.33       | -0.04385 | 0.392712 | 0.519887 |
| TTY14       | Yq11.222       | -0.04385 | 0.392793 | 0.51996  |
| SSUH2       | 3p25.3         | -0.04383 | 0.392947 | 0.520129 |
| SHC1        | 1q21.3         | 0.043815 | 0.393126 | 0.520332 |
| LDHC        | 11p15.1        | 0.043782 | 0.393479 | 0.520709 |
| KRTAP9-4    | 17q21.2        | 0.043781 | 0.393499 | 0.520709 |
| ST14        | 11q24.3        | -0.04378 | 0.393508 | 0.520709 |
| TPI1P3      | 6q22.1         | 0.043779 | 0.393515 | 0.520709 |

|           |          |          |          |          |
|-----------|----------|----------|----------|----------|
| TMEM243   | 7q21.12  | -0.04377 | 0.393622 | 0.520751 |
| SSX5      | Xp11.23  | -0.04377 | 0.393625 | 0.520751 |
| PGK1      | Xq21.1   | 0.043769 | 0.393629 | 0.520751 |
| VSX2      | 14q24.3  | -0.04377 | 0.393651 | 0.520751 |
| NWD2      | 4p14     | 0.043748 | 0.393857 | 0.520989 |
| OLIG2     | 21q22.11 | -0.04374 | 0.393888 | 0.520996 |
| R3HCC1L   | 10q24.2  | -0.04373 | 0.394086 | 0.521223 |
| TMEM45B   | 11q24.3  | -0.04372 | 0.39413  | 0.521247 |
| CLDN14    | 21q22.13 | 0.043715 | 0.394208 | 0.521316 |
| NDUFA9    | 12p13.32 | 0.043709 | 0.394272 | 0.521366 |
| LCA5L     | 21q22.2  | -0.0437  | 0.394384 | 0.52148  |
| DCAF8L1   | Xp21.3   | 0.043695 | 0.394422 | 0.521494 |
| PLEKHG2   | 19q13.2  | 0.043693 | 0.394447 | 0.521494 |
| SRP19     | 5q22.2   | -0.04366 | 0.394832 | 0.521968 |
| SPRR4     | 1q21.3   | -0.04365 | 0.394906 | 0.522023 |
| PTPN1     | 20q13.13 | -0.04365 | 0.394925 | 0.522023 |
| DGCR5     | 22q11.21 | -0.04365 | 0.394954 | 0.522027 |
| VWA8      | 13q14.11 | 0.043614 | 0.395305 | 0.522455 |
| CYP3A43   | 7q22.1   | -0.0436  | 0.395449 | 0.52261  |
| KISS1R    | 19p13.3  | 0.043598 | 0.395474 | 0.52261  |
| DEFA4     | 8p23.1   | -0.04358 | 0.395696 | 0.522869 |
| APRT      | 16q24.3  | 0.043568 | 0.395808 | 0.522982 |
| TMEM258   | 11q12.2  | -0.04356 | 0.395925 | 0.523102 |
| LCAT      | 16q22.1  | 0.043552 | 0.395973 | 0.523131 |
| BICD2     | 9q22.31  | 0.043541 | 0.396091 | 0.523253 |
| DCTN4     | 5q33.1   | -0.04354 | 0.396151 | 0.523298 |
| FMN1      | 15q13.3  | 0.043529 | 0.396222 | 0.523356 |
| KRTAP7-1  | 21q22.11 | 0.043519 | 0.39633  | 0.523465 |
| BABAM1    | 19p13.11 | 0.04351  | 0.396437 | 0.523572 |
| HSBP1L1   | 18q23    | 0.043502 | 0.396522 | 0.52365  |
| MRPS26    | 20p13    | 0.043461 | 0.39697  | 0.524207 |
| OR6C75    | 12q13.2  | -0.04345 | 0.397041 | 0.524218 |
| ZNF189    | 9q31.1   | -0.04345 | 0.397054 | 0.524218 |
| SCARNA10  | 12p13.31 | -0.04345 | 0.397057 | 0.524218 |
| LINC02249 | 15q13.2  | 0.04345  | 0.397088 | 0.524225 |
| C8ORF74   | 8p23.1   | 0.043444 | 0.397154 | 0.524273 |
| KANSL1L   | 2q34     | -0.04344 | 0.397188 | 0.524273 |
| HBE1      | 11p15.4  | -0.04344 | 0.397204 | 0.524273 |
| ELOC      | 8q21.11  | -0.04341 | 0.397506 | 0.52462  |
| LINC00452 | 13q34    | -0.04341 | 0.397519 | 0.52462  |
| TFG       | 3q12.2   | 0.043395 | 0.397682 | 0.524779 |
| MAPKAPK3  | 3p21.2   | -0.04339 | 0.397692 | 0.524779 |
| EDC3      | 15q24.1  | 0.04338  | 0.397846 | 0.524935 |
| GAGE8     | Xp11     | 0.043379 | 0.397863 | 0.524935 |
| TRMT10A   | 4q23     | 0.043367 | 0.397992 | 0.525071 |
| TMEM254   | 10q22.3  | -0.04334 | 0.398282 | 0.52542  |
| NAIP      | 5q13.2   | -0.04334 | 0.398327 | 0.52542  |
| PCDHGA1   | 5q31.3   | -0.04334 | 0.398335 | 0.52542  |
| NAGS      | 17q21.31 | 0.043333 | 0.398362 | 0.525421 |
| BST2      | 19p13.11 | -0.04331 | 0.398599 | 0.525656 |
| RPUSD4    | 11q24.2  | -0.04331 | 0.398601 | 0.525656 |
| PGLS      | 19p13.11 | -0.0433  | 0.398681 | 0.525656 |
| ESRP1     | 8q22.1   | -0.0433  | 0.398681 | 0.525656 |
| RNU12-2P  | Xp11.3   | 0.043303 | 0.398683 | 0.525656 |
| IL9       | 5q31.1   | 0.0433   | 0.398722 | 0.525656 |
| ICK       | 6p12.1   | 0.043298 | 0.398735 | 0.525656 |
| C11ORF86  | 11q13.2  | 0.043297 | 0.39875  | 0.525656 |
| CATSPERE  | 1q44     | -0.04329 | 0.398832 | 0.52573  |

|           |               |          |          |          |
|-----------|---------------|----------|----------|----------|
| PAGE2B    | Xp11.21       | 0.043286 | 0.398871 | 0.525738 |
| C11ORF53  | 11q23.1       | 0.043284 | 0.398891 | 0.525738 |
| TMEM72    | 10q11.21      | -0.04326 | 0.399134 | 0.526016 |
| FAM47C    | Xp21.1        | -0.04326 | 0.399154 | 0.526016 |
| PDE1C     | 7p14.3        | -0.04325 | 0.399267 | 0.52613  |
| RPS6KB1   | 17q23.1       | -0.04324 | 0.399329 | 0.526177 |
| PHKA2     | Xp22.13       | 0.043239 | 0.399381 | 0.526211 |
| SLC16A1   | 1p13.2        | 0.043219 | 0.399602 | 0.526467 |
| SCARNA22  | 4p16.3        | 0.043215 | 0.399641 | 0.526483 |
| SLC17A5   | 6q13          | 0.043206 | 0.399747 | 0.526581 |
| RPS28     | 19p13.2       | -0.0432  | 0.399778 | 0.526581 |
| CLRN1-AS1 | 3q25.1        | 0.043201 | 0.399794 | 0.526581 |
| LYZ       | 12q15         | 0.043197 | 0.399846 | 0.526616 |
| DLG1      | 3q29          | 0.043178 | 0.400048 | 0.526847 |
| RNF138P1  | 5q11.2        | 0.043154 | 0.400317 | 0.527166 |
| BTBD3     | 20p12.2       | -0.04314 | 0.400491 | 0.527339 |
| SCGB2A2   | 11q12.3       | 0.043137 | 0.400501 | 0.527339 |
| AMBP      | 9q32          | 0.043131 | 0.40056  | 0.527383 |
| DNAAF1    | 16q24.1       | 0.043122 | 0.400657 | 0.527475 |
| SCARNA23  | Xp22.11       | 0.043101 | 0.400895 | 0.527754 |
| HERC3     | 4q22.1        | -0.0431  | 0.400929 | 0.527764 |
| OR4F21    | 8p23.3        | 0.043095 | 0.400958 | 0.527768 |
| CRISP3    | 6p12.3        | -0.04308 | 0.401082 | 0.527897 |
| SHF       | 15q21.1       | -0.04308 | 0.40115  | 0.527951 |
| LINC00488 | 3q13.13       | -0.04305 | 0.401482 | 0.528325 |
| NTF4      | 19q13.33      | 0.043047 | 0.401487 | 0.528325 |
| UBA5      | 3q22.1        | 0.042999 | 0.402005 | 0.528973 |
| PDK3      | Xp22.11       | 0.042991 | 0.402099 | 0.52906  |
| PARVB     | 22q13.31      | 0.042983 | 0.402178 | 0.52913  |
| MRFAP1    | 4p16.1        | -0.04297 | 0.402274 | 0.529216 |
| OR52M1    | 11p15.4       | 0.042973 | 0.402296 | 0.529216 |
| PACSIN1   | 6p21.31       | -0.04296 | 0.402465 | 0.529403 |
| DEFB119   | 20q11.21      | -0.04294 | 0.402634 | 0.529561 |
| EXOC3L1   | 16q22.1       | 0.042941 | 0.402638 | 0.529561 |
| SUGT1     | 13q14.3       | -0.04293 | 0.402739 | 0.529655 |
| BORCS5    | 12p13.2       | -0.04293 | 0.402778 | 0.529655 |
| H2BFXP    | Xq22.2        | -0.04293 | 0.402814 | 0.529655 |
| ESCO1     | 18q11.2       | -0.04293 | 0.402815 | 0.529655 |
| POMK      | 8p11.21       | 0.042904 | 0.403051 | 0.529931 |
| PPTC7     | 12q24.11      | 0.042897 | 0.403127 | 0.529995 |
| STAG1     | 3q22.3        | 0.042886 | 0.40325  | 0.530122 |
| EEF2K     | 16p12.2       | 0.042882 | 0.403294 | 0.530146 |
| TBXAS1    | 7q34          | 0.042858 | 0.403559 | 0.530428 |
| FSIP1     | 15q14         | -0.04286 | 0.403562 | 0.530428 |
| NR2E3     | 15q23         | 0.042818 | 0.403999 | 0.530967 |
| HCRT      | 17q21.2       | 0.042812 | 0.404063 | 0.531018 |
| CYP4F30P  | 2q21.1        | 0.042776 | 0.404453 | 0.531495 |
| CTDSPL2   | 15q15.3-q21.1 | -0.04275 | 0.404711 | 0.531799 |
| SOX30     | 5q33.3        | 0.042741 | 0.404842 | 0.531936 |
| CCDC54    | 3q13.12       | -0.04272 | 0.405066 | 0.532196 |
| POFUT2    | 21q22.3       | 0.042713 | 0.405152 | 0.532274 |
| GID8      | 20q13.33      | -0.04271 | 0.405218 | 0.532326 |
| HTRA2     | 2p13.1        | -0.0427  | 0.405247 | 0.532328 |
| DTNB      | 2p23.3        | -0.0427  | 0.405332 | 0.532405 |
| RPL34-AS1 | 4q25          | -0.04268 | 0.405496 | 0.532586 |
| ABCD3     | 1p21.3        | -0.04268 | 0.405553 | 0.532625 |
| FADS1     | 11q12.2       | -0.04264 | 0.405984 | 0.533157 |
| FAM86B2   | 8p23.1        | 0.042624 | 0.406124 | 0.533305 |

|           |              |          |          |          |
|-----------|--------------|----------|----------|----------|
| FCHSD1    | 5q31.3       | -0.0426  | 0.406399 | 0.533632 |
| EEF1AKMT2 | 10q26.13     | 0.042594 | 0.406461 | 0.533679 |
| HMGNS     | Xq21.1       | 0.04259  | 0.406506 | 0.533703 |
| ZAR1      | 4p11         | 0.042538 | 0.407074 | 0.534412 |
| FIBCD1    | 9q34.12      | 0.042535 | 0.407109 | 0.534424 |
| ADARB1    | 21q22.3      | -0.04252 | 0.407312 | 0.534636 |
| C16ORF90  | 16p13.3      | -0.04251 | 0.407339 | 0.534636 |
| SLC11A1   | 2q35         | -0.04251 | 0.407385 | 0.534636 |
| CCNQP1    | 1q32.1       | 0.04251  | 0.407386 | 0.534636 |
| DUSP28    | 2q37.3       | 0.042508 | 0.407404 | 0.534636 |
| ETV6      | 12p13.2      | -0.04249 | 0.407571 | 0.53482  |
| HORMAD2   | 22q12.2      | -0.04249 | 0.407633 | 0.534839 |
| FOXQ1     | 6p25.3       | -0.04249 | 0.407656 | 0.534839 |
| NFE2L3    | 7p15.2       | -0.04248 | 0.407666 | 0.534839 |
| TM4SF4    | 3q25.1       | -0.04248 | 0.407713 | 0.534864 |
| CCDC74B   | 2q21.1       | 0.042477 | 0.407749 | 0.534864 |
| DUSP4     | 8p12         | 0.042475 | 0.407778 | 0.534864 |
| PPA1      | 10q22.1      | 0.042471 | 0.407813 | 0.534864 |
| LINC00518 | 6p24.3       | -0.04247 | 0.407818 | 0.534864 |
| ARID3B    | 15q24.1      | 0.042466 | 0.407878 | 0.534881 |
| RABGGTB   | 1p31.1       | 0.042465 | 0.407885 | 0.534881 |
| BOK       | 2q37.3       | -0.04246 | 0.407954 | 0.534937 |
| GGNBP2    | 17q12        | -0.04246 | 0.407989 | 0.53494  |
| FBXW4     | 10q24.32     | 0.042453 | 0.408013 | 0.53494  |
| KRT6B     | 12q13.13     | 0.042451 | 0.408036 | 0.53494  |
| TGS1      | 8q12.1       | -0.04243 | 0.408277 | 0.535221 |
| OR7E156P  | 13q21.31     | -0.04242 | 0.408346 | 0.535276 |
| OR56A3    | 11p15.4      | -0.04241 | 0.408477 | 0.535413 |
| MRPS36    | 5q13.2       | -0.0424  | 0.408568 | 0.535497 |
| CT55      | Xq26.3       | 0.04238  | 0.408821 | 0.535793 |
| BUD31     | 7q22.1       | -0.04238 | 0.408856 | 0.535804 |
| DNM1      | 9q34.11      | 0.042355 | 0.409104 | 0.536094 |
| BIRC7     | 20q13.33     | -0.04235 | 0.409202 | 0.536187 |
| MRGPRX4   | 11p15.1      | -0.04234 | 0.409251 | 0.536217 |
| AVP       | 20p13        | -0.04233 | 0.409368 | 0.536335 |
| SNORC     | 2q37.1       | 0.042314 | 0.409552 | 0.53654  |
| SPINT4    | 20q13.12     | -0.0423  | 0.409717 | 0.536722 |
| CHST6     | 16q23.1      | 0.042251 | 0.410252 | 0.537388 |
| FAM49B    | 8q24.21      | -0.04225 | 0.410287 | 0.537398 |
| TRAPPC12  | 2p25.3       | -0.04223 | 0.410516 | 0.537645 |
| OR4M2     | 15q11.2      | -0.04223 | 0.410529 | 0.537645 |
| ADAMTS4   | 1q23.3       | -0.04222 | 0.4106   | 0.537702 |
| PRDX4     | Xp22.11      | -0.0422  | 0.410858 | 0.538005 |
| LINC00052 | 15q25.3      | -0.04217 | 0.411103 | 0.538291 |
| TRIM29    | 11q23.3      | -0.04216 | 0.411281 | 0.538488 |
| ZNF784    | 19q13.42     | 0.042125 | 0.411654 | 0.538942 |
| RAD51D    | 17q12        | 0.042121 | 0.411694 | 0.53896  |
| CLCF1     | 11q13.2      | -0.04211 | 0.411809 | 0.539075 |
| PJVK      | 2q31.2       | -0.0421  | 0.41191  | 0.539171 |
| RGS9BP    | 19q13.11     | -0.0421  | 0.411952 | 0.539191 |
| ATL2      | 2p22.2-p22.1 | -0.04209 | 0.412017 | 0.539242 |
| LOC153684 | 5p12         | 0.042087 | 0.412074 | 0.53928  |
| KLHL34    | Xp22.12      | -0.04208 | 0.412196 | 0.539405 |
| FAM74A4   | 9q12         | -0.04205 | 0.41254  | 0.539819 |
| OR1F1     | 16p13.3      | -0.04203 | 0.412714 | 0.540012 |
| ACCSL     | 11p11.2      | 0.042017 | 0.412857 | 0.540164 |
| GJD4      | 10p11.21     | -0.042   | 0.413002 | 0.540319 |
| MAJIN     | 11q13.1      | -0.042   | 0.413086 | 0.540393 |

|          |                 |          |          |          |
|----------|-----------------|----------|----------|----------|
| PLPPR3   | 19p13.3         | -0.04199 | 0.413199 | 0.540506 |
| OR9Q2    | 11q12.1         | 0.041982 | 0.413243 | 0.540527 |
| TXNDC17  | 17p13.1         | 0.041975 | 0.413321 | 0.540594 |
| GOLGA2P6 | 10p11.23        | 0.041972 | 0.413353 | 0.540601 |
| SLC22A25 | 11q12.3         | 0.041967 | 0.413412 | 0.540643 |
| TRIM62   | 1p35.1          | -0.04196 | 0.41344  | 0.540645 |
| ME2      | 18q21.2         | 0.041945 | 0.413659 | 0.540895 |
| UBE2A    | Xq24            | -0.04193 | 0.413774 | 0.540993 |
| USP9Y    | Yq11.221        | -0.04193 | 0.413788 | 0.540993 |
| KCNH5    | 14q23.2         | -0.0419  | 0.414168 | 0.541453 |
| FAM214B  | 9p13.3          | -0.0419  | 0.414194 | 0.541453 |
| SLC5A4   | 22q12.3         | -0.04188 | 0.414434 | 0.541732 |
| ILVBL    | 19p13.12        | 0.041868 | 0.414511 | 0.541797 |
| BRS3     | Xq26.3          | 0.041855 | 0.414652 | 0.541946 |
| C4ORF33  | 4q28.2          | -0.04184 | 0.41483  | 0.542131 |
| PPP4R2   | 3p13            | -0.04184 | 0.414851 | 0.542131 |
| SERPINB2 | 18q21.33-q22.1  | -0.04184 | 0.414875 | 0.542131 |
| PABPC1P2 | 2q22.3          | -0.0418  | 0.415306 | 0.542659 |
| ARHGEF4  | 2q21.1          | 0.04178  | 0.415491 | 0.542866 |
| CDHR3    | 7q22.3          | 0.041775 | 0.415554 | 0.542883 |
| CENPC    | 4q13.2          | -0.04177 | 0.415559 | 0.542883 |
| SLC41A3  | 3q21.2-q21.3    | -0.04177 | 0.415648 | 0.542964 |
| PRKY     | Yp11.2          | 0.041753 | 0.415796 | 0.5431   |
| XPR1     | 1q25.3          | 0.041752 | 0.415807 | 0.5431   |
| LILRA6   | 19q13.42        | -0.04173 | 0.416057 | 0.543392 |
| CAPN3    | 15q15.1         | 0.041726 | 0.4161   | 0.543413 |
| S100A6   | 1q21.3          | 0.041706 | 0.416322 | 0.543667 |
| PKD2L1   | 10q24.31        | -0.0417  | 0.416355 | 0.543674 |
| CCDC97   | 19q13.2         | -0.0417  | 0.41641  | 0.543711 |
| ZNRD1    | 6p22.1          | 0.041692 | 0.416483 | 0.543771 |
| FLG2     | 1q21.3          | -0.04168 | 0.416614 | 0.54388  |
| ALDH5A1  | 6p22.3          | -0.04168 | 0.41662  | 0.54388  |
| GPR180   | 13q32.1         | -0.04167 | 0.416709 | 0.543935 |
| VGLL1    | Xq26.3          | -0.04167 | 0.416717 | 0.543935 |
| HRH4     | 18q11.2         | -0.04167 | 0.416759 | 0.543954 |
| FAM133CP | 10q21.1         | -0.04166 | 0.416873 | 0.544063 |
| PRB3     | 12p13.2         | -0.04165 | 0.416897 | 0.544063 |
| PHB2     | 12p13.31        | 0.041646 | 0.416999 | 0.544161 |
| FOXO3B   | 17p11.2         | -0.04163 | 0.417153 | 0.544326 |
| MSL3     | Xp22.2          | -0.04162 | 0.417261 | 0.544433 |
| KBTBD2   | 7p14.3          | 0.041619 | 0.417295 | 0.544441 |
| C17ORF75 | 17q11.2         | -0.04162 | 0.417336 | 0.544459 |
| SEC1P    | 19q13.33        | 0.041606 | 0.417442 | 0.544562 |
| MACO1    | 1p36.11 1p36.11 | -0.04158 | 0.417705 | 0.54487  |
| BTN3A2   | 6p22.2          | -0.04155 | 0.418055 | 0.54529  |
| ITGA3    | 17q21.33        | 0.041538 | 0.418207 | 0.545398 |
| C8ORF86  | 8p11.22         | -0.04154 | 0.418211 | 0.545398 |
| MAPKBP1  | 15q15.1         | -0.04154 | 0.418219 | 0.545398 |
| OLA1     | 2q31.1          | -0.04152 | 0.418454 | 0.545667 |
| PEMT     | 17p11.2         | -0.04151 | 0.41848  | 0.545667 |
| AATBC    | 21q22.3         | -0.0415  | 0.418683 | 0.545896 |
| ATG2A    | 11q13.1         | 0.04149  | 0.41874  | 0.545909 |
| FAM131C  | 1p36.13         | 0.04149  | 0.418748 | 0.545909 |
| ACSS2    | 20q11.22        | 0.041483 | 0.418826 | 0.545975 |
| DGLUCY   | 14q32.11        | -0.04146 | 0.419036 | 0.546214 |
| PARP6    | 15q23           | 0.041451 | 0.419181 | 0.546315 |
| HCN1     | 5p12            | 0.041451 | 0.419183 | 0.546315 |
| BCOR     | Xp11.4          | 0.04145  | 0.419195 | 0.546315 |



|           |               |          |          |          |
|-----------|---------------|----------|----------|----------|
| CLPX      | 15q22.31      | 0.041443 | 0.419275 | 0.546361 |
| CCT6A     | 7p11.2        | 0.041442 | 0.419285 | 0.546361 |
| IFI6      | 1p35.3        | -0.04144 | 0.419316 | 0.546366 |
| KRTAP3-2  | 17q21.2       | -0.04144 | 0.419351 | 0.546375 |
| ISOC1     | 5q23.3        | 0.041412 | 0.419619 | 0.546689 |
| SLC1A4    | 2p14          | 0.041405 | 0.419694 | 0.546751 |
| TNR       | 1q25.1        | -0.0414  | 0.419773 | 0.546819 |
| TMED9     | 5q35.3        | -0.04138 | 0.419926 | 0.546972 |
| RDH10     | 8q21.11       | -0.04138 | 0.419945 | 0.546972 |
| WNT10B    | 12q13.12      | 0.041375 | 0.420032 | 0.547043 |
| SEMA6D    | 15q21.1       | -0.04137 | 0.420054 | 0.547043 |
| GPR152    | 11q13.2       | 0.041363 | 0.420174 | 0.547163 |
| HBG2      | 11p15.4       | 0.04136  | 0.420206 | 0.54717  |
| NGEF      | 2q37.1        | -0.04134 | 0.420427 | 0.547422 |
| LSMEM2    | 3p21.31       | 0.041334 | 0.420495 | 0.547475 |
| LUZP4     | Xq23          | -0.04132 | 0.420621 | 0.547602 |
| GPR137    | 11q13.1       | 0.041318 | 0.420679 | 0.547643 |
| LRFN2     | 6p21.2-p21.1  | -0.0413  | 0.420831 | 0.547805 |
| IL11      | 19q13.42      | 0.041297 | 0.420907 | 0.547868 |
| CYP2S1    | 19q13.2       | -0.04128 | 0.421098 | 0.548055 |
| XKR5      | 8p23.1        | -0.04128 | 0.421124 | 0.548055 |
| DDX18     | 2q14.1        | -0.04128 | 0.421132 | 0.548055 |
| SLC35F4   | 14q22.3-q23.1 | -0.04127 | 0.42117  | 0.548068 |
| GPR50     | Xq28          | -0.04127 | 0.421215 | 0.548092 |
| CXCL8     | 4q13.3        | -0.04127 | 0.421268 | 0.548124 |
| SEPHS1P1  | 7q11.21       | -0.04125 | 0.42139  | 0.548248 |
| NMI       | 2q23.3        | -0.04124 | 0.421547 | 0.548416 |
| PPIAL4E   | 1q21.1        | 0.041235 | 0.421607 | 0.548459 |
| TRMT13    | 1p21.2        | -0.04121 | 0.421899 | 0.548802 |
| KLF7      | 2q33.3        | -0.0412  | 0.421998 | 0.548896 |
| LINC01312 | 6q23.2        | -0.04119 | 0.422068 | 0.548952 |
| HSFX2     | Xq28          | -0.04117 | 0.422303 | 0.549221 |
| ODF3B     | 22q13.33      | -0.04117 | 0.422355 | 0.549237 |
| AP5M1     | 14q22.3       | -0.04117 | 0.42237  | 0.549237 |
| PINX1     | 8p23.1        | 0.041149 | 0.422583 | 0.54945  |
| PTPN12    | 7q11.23       | -0.04115 | 0.422588 | 0.54945  |
| DENND4A   | 15q22.31      | -0.04114 | 0.422676 | 0.549528 |
| TAF3      | 10p14         | 0.041124 | 0.42286  | 0.549732 |
| OR4F15    | 15q26.3       | -0.04112 | 0.422954 | 0.549782 |
| KRTAP4-3  | 17q21.2       | 0.041116 | 0.422954 | 0.549782 |
| PPIE      | 1p34.2        | -0.04111 | 0.423072 | 0.5499   |
| UBR5      | 8q22.3        | 0.041096 | 0.423174 | 0.549997 |
| TTC17     | 11p12-p11.2   | -0.04109 | 0.423276 | 0.550094 |
| SLC22A1   | 6q25.3        | 0.041084 | 0.423312 | 0.550105 |
| TRIM53AP  | 11q14.3       | 0.041078 | 0.423384 | 0.550163 |
| TPTE2     | 13q12.11      | -0.04107 | 0.423516 | 0.55029  |
| SAMD7     | 3q26.2        | 0.041064 | 0.423537 | 0.55029  |
| ATP5MC3   | 2q31.1        | 0.041061 | 0.42357  | 0.550298 |
| SYT13     | 11p11.2       | 0.041048 | 0.423723 | 0.550461 |
| HHATL     | 3p22.1        | -0.04104 | 0.423791 | 0.550513 |
| TMEM30B   | 14q23.1       | -0.04102 | 0.423998 | 0.550747 |
| CD5L      | 1q23.1        | -0.04101 | 0.42411  | 0.550856 |
| TUT7      | 9q21.33       | 0.041009 | 0.424166 | 0.550894 |
| PGAP2     | 11p15.4       | -0.04099 | 0.424405 | 0.551168 |
| USP18     | 22q11.21      | 0.040977 | 0.424522 | 0.551284 |
| SSTR3     | 22q13.1       | -0.04096 | 0.424731 | 0.551519 |
| DMRTC2    | 19q13.2       | 0.040955 | 0.42477  | 0.551534 |
| BTBD16    | 10q26.13      | 0.040942 | 0.424914 | 0.551686 |

|           |              |          |          |          |
|-----------|--------------|----------|----------|----------|
| PTPN13    | 4q21.3       | 0.0409   | 0.425389 | 0.552267 |
| KIAA2026  | 9p24.1       | 0.040891 | 0.425497 | 0.552371 |
| WHRN      | 9q32         | -0.04089 | 0.425543 | 0.552395 |
| NANOS1    | 10q26.11     | 0.040875 | 0.425675 | 0.55253  |
| RPS12     | 6q23.2       | -0.04087 | 0.42577  | 0.552615 |
| OR10G9    | 11q24.2      | -0.04086 | 0.425796 | 0.552615 |
| PRTN3     | 19p13.3      | 0.040855 | 0.425905 | 0.552721 |
| ACOXL     | 2q13         | 0.040835 | 0.426132 | 0.552981 |
| ABHD6     | 3p14.3       | -0.04083 | 0.42618  | 0.553007 |
| OR2D3     | 11p15.4      | 0.040824 | 0.42625  | 0.553049 |
| ADGB      | 6q24.3       | 0.040823 | 0.426267 | 0.553049 |
| GLDN      | 15q21.2      | -0.04082 | 0.426339 | 0.553096 |
| AFM       | 4q13.3       | -0.04081 | 0.426359 | 0.553096 |
| ZBTB49    | 4p16.3       | -0.04081 | 0.426466 | 0.553198 |
| BCAS1     | 20q13.2      | -0.04079 | 0.426641 | 0.55339  |
| RBM4B     | 11q13.2      | -0.04078 | 0.426805 | 0.553531 |
| LOC145845 | 15q14        | -0.04078 | 0.426805 | 0.553531 |
| ATP2A3    | 17p13.2      | -0.04077 | 0.426908 | 0.553628 |
| STON2     | 14q31.1      | 0.040759 | 0.426988 | 0.55364  |
| PCDHGB3   | 5q31.3       | -0.04076 | 0.427012 | 0.55364  |
| PLPBP     | 8p11.23      | -0.04076 | 0.427018 | 0.55364  |
| DECR2     | 16p13.3      | 0.040756 | 0.427027 | 0.55364  |
| AADA2L2   | 3q25.1       | -0.04075 | 0.427121 | 0.553726 |
| LYRM7     | 5q23.3-q31.1 | -0.04074 | 0.427201 | 0.553776 |
| SEZ6      | 17q11.2      | -0.04074 | 0.427215 | 0.553776 |
| DCAF11    | 14q12        | -0.04074 | 0.427262 | 0.553801 |
| AAMP      | 2q35         | 0.040715 | 0.427489 | 0.554003 |
| SLC1A1    | 9p24.2       | 0.040713 | 0.427511 | 0.554003 |
| AANAT     | 17q25.1      | 0.040713 | 0.427521 | 0.554003 |
| CBFB      | 16q22.1      | 0.040712 | 0.427529 | 0.554003 |
| FGD4      | 12p11.21     | 0.040706 | 0.427599 | 0.554039 |
| PROM2     | 2q11.1       | 0.040705 | 0.427612 | 0.554039 |
| IRX2      | 5p15.33      | 0.040694 | 0.427734 | 0.554142 |
| LGALS3BP  | 17q25.3      | -0.04069 | 0.427746 | 0.554142 |
| KRTAP4-5  | 17q21.2      | -0.04068 | 0.427837 | 0.554224 |
| SIK1      | 21q22.3      | -0.04066 | 0.428104 | 0.554533 |
| CPA6      | 8q13.2       | -0.04066 | 0.428137 | 0.55454  |
| KC6       | -            | -0.04066 | 0.428165 | 0.554541 |
| RPP40     | 6p25.1       | 0.040646 | 0.428275 | 0.554632 |
| SMCHD1    | 18p11.32     | 0.040644 | 0.428304 | 0.554632 |
| SLC20A1   | 2q14.1       | 0.040642 | 0.428319 | 0.554632 |
| ACSM2B    | 16p12.3      | -0.04063 | 0.428419 | 0.554727 |
| CCL28     | 5p12         | 0.040623 | 0.428539 | 0.55478  |
| LINC01003 | 7q36.1       | -0.04062 | 0.428539 | 0.55478  |
| FAM215A   | 17q21.31     | -0.04062 | 0.428549 | 0.55478  |
| RFNG      | 17q25.3      | -0.04062 | 0.428596 | 0.55478  |
| OLIG1     | 21q22.11     | -0.04062 | 0.428599 | 0.55478  |
| PROK1     | 1p13.3       | -0.04061 | 0.428662 | 0.554826 |
| RFXAP     | 13q13.3      | 0.040608 | 0.428713 | 0.554856 |
| DDT       | 22q11.23     | 0.040598 | 0.428821 | 0.554959 |
| SND1      | 7q32.1       | -0.0406  | 0.428855 | 0.554968 |
| MUC12     | 7q22.1       | -0.04059 | 0.428939 | 0.55504  |
| SLC9A4    | 2q12.1       | 0.040585 | 0.428977 | 0.555053 |
| C3ORF67   | 3p14.2       | -0.04058 | 0.429081 | 0.555152 |
| NDUFS4    | 5q11.2       | -0.04057 | 0.42912  | 0.555167 |
| ORC3      | 6q15         | 0.040552 | 0.429343 | 0.555399 |
| DNAJB3    | 2q37.1       | 0.04055  | 0.429367 | 0.555399 |
| THADA     | 2p21         | -0.04055 | 0.429382 | 0.555399 |

|             |          |          |          |          |
|-------------|----------|----------|----------|----------|
| AVIL        | 12q14.1  | -0.04054 | 0.429437 | 0.555434 |
| USP53       | 4q26     | -0.04052 | 0.429723 | 0.555768 |
| ZNF619      | 3p22.1   | 0.040509 | 0.429838 | 0.555851 |
| GIGYF2      | 2q37.1   | -0.04051 | 0.429843 | 0.555851 |
| MB          | 22q12.3  | -0.04051 | 0.42988  | 0.555862 |
| MDH2        | 7q11.23  | 0.040497 | 0.429968 | 0.555941 |
| TGIF2LY     | Yp11.2   | -0.04049 | 0.430021 | 0.555974 |
| BLNK        | 10q24.1  | -0.04047 | 0.430253 | 0.556238 |
| NR1D1       | 17q21.1  | 0.040453 | 0.430472 | 0.556484 |
| THUMPD3     | 3p25.3   | -0.04044 | 0.43057  | 0.556575 |
| ZNF441      | 19p13.2  | -0.04042 | 0.430813 | 0.556826 |
| NHLH2       | 1p13.1   | -0.04042 | 0.430819 | 0.556826 |
| CEBPD       | 8q11.21  | -0.04042 | 0.430887 | 0.556877 |
| EPHX4       | 1p22.1   | -0.04041 | 0.431002 | 0.55699  |
| NME4        | 16p13.3  | -0.0404  | 0.4311   | 0.557041 |
| ZSCAN9      | 6p22.1   | 0.040397 | 0.43111  | 0.557041 |
| NONO        | Xq13.1   | 0.040396 | 0.431125 | 0.557041 |
| KRT74       | 12q13.13 | -0.04039 | 0.431164 | 0.557053 |
| ZC2HC1B     | 6q24.2   | 0.040389 | 0.431205 | 0.557053 |
| FAM205BP    | 9p13.3   | 0.040388 | 0.431218 | 0.557053 |
| CLPS        | 6p21.31  | 0.040379 | 0.431323 | 0.557154 |
| CHMP7       | 8p21.3   | -0.04037 | 0.431444 | 0.557274 |
| PRELID2     | 5q32     | 0.040355 | 0.431592 | 0.557412 |
| ARID2       | 12q12    | -0.04035 | 0.431607 | 0.557412 |
| CBLN3       | 14q12    | -0.04035 | 0.431649 | 0.55743  |
| WFDC10B     | 20q13.12 | -0.04035 | 0.4317   | 0.55746  |
| NDUFS3      | 11p11.2  | 0.040326 | 0.431922 | 0.557711 |
| HAVCR1      | 5q33.3   | -0.04032 | 0.431952 | 0.557714 |
| ZMYM5       | 13q12.11 | -0.04031 | 0.432052 | 0.557766 |
| UNK         | 17q25.1  | -0.04031 | 0.432075 | 0.557766 |
| KRT76       | 12q13.13 | 0.040312 | 0.432085 | 0.557766 |
| SYS1-DBNDD2 | 20q13.12 | -0.04031 | 0.432103 | 0.557766 |
| CRIP1       | 14q32.33 | 0.040308 | 0.432136 | 0.557771 |
| PRPF38A     | 1p32.3   | 0.040299 | 0.432229 | 0.557856 |
| ATP6V1F     | 7q32.1   | -0.04029 | 0.432352 | 0.557979 |
| BSCL2       | 11q12.3  | 0.040283 | 0.432419 | 0.558006 |
| TDRD7       | 9q22.33  | -0.04028 | 0.432429 | 0.558006 |
| ASNA1       | 19p13.13 | 0.040271 | 0.432554 | 0.558107 |
| ID1         | 20q11.21 | -0.04027 | 0.432584 | 0.558107 |
| TSPO        | 22q13.2  | 0.040268 | 0.432591 | 0.558107 |
| HSPH1       | 13q12.3  | 0.040257 | 0.432717 | 0.558195 |
| DFFA        | 1p36.22  | 0.040256 | 0.432729 | 0.558195 |
| MYLK4       | 6p25.2   | 0.040255 | 0.432742 | 0.558195 |
| NKX1-2      | 10q26.13 | 0.040249 | 0.432804 | 0.558233 |
| PSMG2       | 18p11.21 | -0.04025 | 0.432827 | 0.558233 |
| CBX3        | 7p15.2   | 0.040239 | 0.432924 | 0.558321 |
| NDUFAF8     | 17q25.3  | -0.04023 | 0.433066 | 0.558469 |
| LINC00710   | 10p14    | 0.040221 | 0.433121 | 0.558503 |
| CRYGC       | 2q33.3   | 0.040212 | 0.433234 | 0.558614 |
| MKKS        | 20p12.2  | -0.04019 | 0.433434 | 0.558834 |
| APOF        | 12q13.3  | 0.040178 | 0.433613 | 0.55903  |
| OR4D1       | 17q22    | 0.040175 | 0.433648 | 0.559038 |
| NAA80       | 3p21.31  | 0.040148 | 0.433965 | 0.559411 |
| RPUSD2      | 15q15.1  | 0.040143 | 0.434021 | 0.559447 |
| OR6M1       | 11q24.1  | -0.04014 | 0.434099 | 0.559513 |
| UBP1        | 3p22.3   | 0.04012  | 0.43428  | 0.559709 |
| FNIP2       | 4q32.1   | -0.04012 | 0.434334 | 0.559743 |
| HBG1        | 11p15.4  | 0.0401   | 0.434507 | 0.559906 |

|           |               |          |          |          |
|-----------|---------------|----------|----------|----------|
| HIVEP3    | 1p34.2        | -0.0401  | 0.434517 | 0.559906 |
| PRAG1     | 8p23.1        | -0.04008 | 0.434697 | 0.560102 |
| ZNFX1     | 20q13.13      | -0.04008 | 0.434771 | 0.560162 |
| LHFPL3    | 7q22.2-q22.3  | -0.04007 | 0.434845 | 0.560201 |
| ATE1      | 10q26.13      | 0.04007  | 0.434857 | 0.560201 |
| DOK3      | 5q35.3        | -0.04007 | 0.434892 | 0.56021  |
| LIN52     | 14q24.3       | -0.04006 | 0.434924 | 0.560215 |
| AGBL1     | 15q25.3       | 0.040047 | 0.435123 | 0.560435 |
| ADAM20    | 14q24.2       | 0.040039 | 0.43521  | 0.560511 |
| FABP7     | 6q22.31       | -0.04001 | 0.435566 | 0.560934 |
| COPS5     | 8q13.1        | -0.04    | 0.435688 | 0.561054 |
| DPYSL2    | 8p21.2        | -0.03999 | 0.435749 | 0.561098 |
| C11ORF80  | 11q13.2       | 0.039988 | 0.435799 | 0.561125 |
| NES       | 1q23.1        | -0.03997 | 0.435994 | 0.561341 |
| TXN2      | 22q12.3       | 0.039955 | 0.436181 | 0.561507 |
| LINC00917 | 16q24.1       | -0.03995 | 0.4362   | 0.561507 |
| OR6C70    | 12q13.2       | -0.03995 | 0.436207 | 0.561507 |
| EXOC2     | 6p25.3        | 0.039946 | 0.436284 | 0.561569 |
| TMA7      | 3p21.31       | 0.039935 | 0.436412 | 0.561699 |
| MSRB1     | 16p13.3       | -0.03992 | 0.436566 | 0.561837 |
| SMPD3     | 16q22.1       | 0.03992  | 0.436576 | 0.561837 |
| PLEKHG4B  | 5p15.33       | -0.03991 | 0.436654 | 0.561856 |
| RPL3L     | 16p13.3       | 0.039912 | 0.436671 | 0.561856 |
| NENF      | 1q32.3        | 0.039912 | 0.436675 | 0.561856 |
| HIST1H2BC | 6p22.2        | 0.039906 | 0.436744 | 0.561909 |
| ZNF48     | 16p11.2       | 0.039901 | 0.436803 | 0.561949 |
| C2CD6     | 2q33.1        | 0.039891 | 0.436914 | 0.562055 |
| RAET1K    | 6q25.1        | 0.039886 | 0.436965 | 0.562061 |
| PLAAT3    | 11q12.3-q13.1 | -0.03989 | 0.436974 | 0.562061 |
| COPS3     | 17p11.2       | -0.03987 | 0.437101 | 0.562151 |
| OR5B3     | 11q12.1       | -0.03987 | 0.437104 | 0.562151 |
| GOLGA6A   | 15q24.1       | -0.03987 | 0.437171 | 0.562151 |
| ARFGEF1   | 8q13.2        | -0.03987 | 0.437202 | 0.562151 |
| PRSS8     | 16p11.2       | 0.039865 | 0.437212 | 0.562151 |
| CPXCR1    | Xq21.31       | -0.03986 | 0.437213 | 0.562151 |
| CAMKK2    | 12q24.31      | 0.039858 | 0.437288 | 0.562211 |
| ARSJ      | 4q26          | 0.039848 | 0.437408 | 0.562329 |
| SWSAP1    | 19p13.2       | -0.03984 | 0.437462 | 0.562363 |
| DCP2      | 5q22.2        | 0.039829 | 0.437628 | 0.562541 |
| CA3       | 8q21.2        | 0.039801 | 0.437946 | 0.562912 |
| ZBTB48    | 1p36.31       | 0.039792 | 0.438049 | 0.56297  |
| MAP3K8    | 10p11.23      | -0.03979 | 0.438052 | 0.56297  |
| C15ORF54  | 15q14         | -0.03979 | 0.438106 | 0.56297  |
| HCRTR1    | 1p35.2        | -0.03979 | 0.43812  | 0.56297  |
| TRIO      | 5p15.2        | -0.03978 | 0.438134 | 0.56297  |
| TRIM24    | 7q33-q34      | 0.039783 | 0.438159 | 0.56297  |
| RMRP      | 9p13.3        | -0.03977 | 0.438336 | 0.563156 |
| DHRS4     | 14q11.2       | -0.03977 | 0.43836  | 0.563156 |
| SNHG6     | 8q13.1 8q13   | -0.03975 | 0.438578 | 0.5634   |
| OR4C45    | 11p11.12      | 0.039722 | 0.438858 | 0.563723 |
| RDH11     | 14q24.1       | -0.03971 | 0.438956 | 0.563813 |
| AMY1A     | 1p21.1        | 0.039702 | 0.439087 | 0.563945 |
| S100A9    | 1q21.3        | -0.03969 | 0.439184 | 0.564007 |
| MEA1      | 6p21.1        | 0.039693 | 0.439192 | 0.564007 |
| INSC      | 11p15.2       | 0.039677 | 0.439377 | 0.564195 |
| TEX55     | 3q13.32       | -0.03967 | 0.439423 | 0.564195 |
| NARS2     | 11q14.1       | -0.03967 | 0.439447 | 0.564195 |
| C10ORF105 | 10q22.1       | -0.03967 | 0.43945  | 0.564195 |

|            |                 |          |          |          |
|------------|-----------------|----------|----------|----------|
| NEURL1     | 10q24.33        | -0.03966 | 0.439529 | 0.56426  |
| WDR64      | 1q43            | -0.03964 | 0.439764 | 0.564494 |
| NAPEPLD    | 7q22.1          | -0.03964 | 0.439768 | 0.564494 |
| ELSPBP1    | 19q13.33        | -0.03963 | 0.439894 | 0.564619 |
| STATH      | 4q13.3          | -0.03962 | 0.439987 | 0.564702 |
| TUSC1      | 9p21.2          | -0.03962 | 0.440051 | 0.564749 |
| PEAK1      | 15q24.3         | -0.03961 | 0.440101 | 0.564777 |
| TMEM213    | 7q34            | -0.03961 | 0.440168 | 0.564827 |
| GNG13      | 16p13.3         | 0.039589 | 0.440398 | 0.565086 |
| BCL2L10    | 15q21.2         | -0.03959 | 0.440431 | 0.565091 |
| ZNF791     | 19p13.13        | -0.03958 | 0.440489 | 0.56513  |
| PTPN22     | 1p13.2          | -0.03956 | 0.44076  | 0.565442 |
| SPINT1     | 15q15.1         | -0.03955 | 0.440793 | 0.565447 |
| GPR37L1    | 1q32.1          | -0.03953 | 0.441131 | 0.565845 |
| ZNF470     | 19q13.43        | -0.03952 | 0.441236 | 0.565943 |
| GUSBP4     | 6p11.2          | 0.039506 | 0.441358 | 0.566063 |
| DNASE1L1   | Xq28            | -0.0395  | 0.441445 | 0.566139 |
| KLHDC3     | 6p21.1          | 0.039479 | 0.441672 | 0.566358 |
| MRPL23-AS1 | 11p15.5         | -0.03948 | 0.441672 | 0.566358 |
| UGT1A3     | 2q37.1          | -0.03946 | 0.441892 | 0.566603 |
| RGR        | 10q23.1         | -0.03946 | 0.441929 | 0.566614 |
| CXCL16     | 17p13.2         | 0.039436 | 0.44216  | 0.566875 |
| OR1D4      | 17p13.3         | 0.039426 | 0.442285 | 0.566998 |
| CELA2B     | 1p36.21         | 0.039417 | 0.442387 | 0.567092 |
| LCE1B      | 1q21.3          | -0.03941 | 0.442513 | 0.567183 |
| CCDC148    | 2q24.1          | 0.039406 | 0.442514 | 0.567183 |
| PSCA       | 8q24.3          | -0.0394  | 0.442587 | 0.567239 |
| GCHFR      | 15q15.1         | 0.039388 | 0.442717 | 0.56735  |
| OR2C3      | 1q44            | -0.03939 | 0.44273  | 0.56735  |
| FAM86JP    | 3q21.2          | -0.03935 | 0.443111 | 0.567802 |
| MAPKAPK5   | 12q24.12-q24.13 | 0.039349 | 0.443171 | 0.567831 |
| ATXN8OS    | 13q21.33        | -0.03935 | 0.443192 | 0.567831 |
| ZNF75A     | 16p13.3         | -0.03935 | 0.443218 | 0.567831 |
| PTBP3      | 9q32            | -0.03933 | 0.443338 | 0.567948 |
| JADE3      | Xp11.3          | 0.039331 | 0.443378 | 0.567963 |
| TOGARAM2   | 2p23.2          | 0.039325 | 0.44345  | 0.567993 |
| AARSD1     | 17q21.31        | 0.039324 | 0.443458 | 0.567993 |
| LGR5       | 12q21.1         | -0.0393  | 0.443745 | 0.568324 |
| HTR3E      | 3q27.1          | -0.03929 | 0.443892 | 0.568476 |
| CCSER2     | 10q23.1         | -0.03928 | 0.443938 | 0.568498 |
| NADK2      | 5p13.2          | 0.039271 | 0.444073 | 0.568635 |
| SLC12A8    | 3q21.2          | 0.039268 | 0.44411  | 0.568646 |
| KRTAP10-1  | 21q22.3         | 0.039258 | 0.444228 | 0.568761 |
| ZNF195     | 11p15.4         | -0.03925 | 0.444365 | 0.5689   |
| CARMIL2    | 16q22.1         | -0.03924 | 0.444453 | 0.568976 |
| SOCS1      | 16p13.13        | 0.039231 | 0.444548 | 0.569047 |
| NAA20      | 20p11.23        | -0.03923 | 0.444565 | 0.569047 |
| C4ORF17    | 4q23            | -0.0392  | 0.444869 | 0.569371 |
| C10RF122   | 1p34.3          | -0.0392  | 0.444875 | 0.569371 |
| SHOC1      | 9q31.3          | 0.039181 | 0.445129 | 0.56966  |
| PATJ       | 1p31.3          | 0.039157 | 0.445409 | 0.569981 |
| KCNJ9      | 1q23.2          | -0.03915 | 0.445457 | 0.570006 |
| C10ORF113  | 10p12.31        | 0.039134 | 0.445667 | 0.570239 |
| ANP32AP1   | 15q14           | 0.039112 | 0.445927 | 0.570535 |
| EIF4B      | 12q13.13        | -0.03909 | 0.44615  | 0.570784 |
| MRPL1      | 4q21.1          | -0.03908 | 0.44628  | 0.570887 |
| BTBD6      | 14q32.33        | 0.039081 | 0.446288 | 0.570887 |
| GNAT3      | 7q21.11         | -0.03907 | 0.446367 | 0.570952 |

|             |                 |          |          |          |
|-------------|-----------------|----------|----------|----------|
| HINT3       | 6q22.32         | -0.03907 | 0.446473 | 0.571051 |
| TMEM116     | 12q24.12-q24.13 | 0.039049 | 0.446664 | 0.571259 |
| GAGE2E      | Xp11.23         | 0.039025 | 0.446937 | 0.571571 |
| PRSS37      | 7q34            | 0.039009 | 0.447127 | 0.571778 |
| APBA1       | 9q21.12         | -0.03901 | 0.447168 | 0.571794 |
| TSEN34      | 19q13.42        | -0.039   | 0.447269 | 0.571875 |
| ERP29       | 12q24.13        | -0.039   | 0.447289 | 0.571875 |
| SLC26A9     | 1q32.1          | 0.038979 | 0.447472 | 0.572072 |
| MTMR12      | 5p13.3          | -0.03895 | 0.447761 | 0.572376 |
| SNAP47      | 1q42.13         | 0.038952 | 0.447788 | 0.572376 |
| TTYH3       | 7p22.3          | 0.038951 | 0.447801 | 0.572376 |
| MRS2P2      | 12q21.1         | 0.038949 | 0.447824 | 0.572376 |
| SPIDR       | 8q11.21         | -0.03892 | 0.448183 | 0.572775 |
| MUC13       | 3q21.2          | -0.03892 | 0.448193 | 0.572775 |
| BORCS6      | 17p13.1         | -0.03891 | 0.448301 | 0.572876 |
| ZNF701      | 19q13.41        | -0.0389  | 0.44834  | 0.57289  |
| BTNL2       | 6p21.32         | -0.0389  | 0.448426 | 0.572964 |
| FREM1       | 9p22.3          | 0.038882 | 0.44861  | 0.573162 |
| URM1        | 9q34.11         | 0.038876 | 0.448673 | 0.573197 |
| PTOV1       | 19q13.33        | 0.038874 | 0.448705 | 0.573197 |
| DOK1        | 2p13.1          | -0.03887 | 0.448723 | 0.573197 |
| ZNF280C     | Xq26.1          | 0.038849 | 0.448992 | 0.573504 |
| LNX1        | 4q12            | -0.03884 | 0.449138 | 0.573633 |
| SLC35C1     | 11p11.2         | 0.038836 | 0.449151 | 0.573633 |
| ARRDC5      | 19p13.3         | 0.038821 | 0.449326 | 0.57382  |
| SEMA3B      | 3p21.31         | 0.038815 | 0.449392 | 0.573868 |
| PSMG1       | 21q22.2         | 0.038803 | 0.449528 | 0.574005 |
| OR52E8      | 11p15.4         | -0.03879 | 0.449649 | 0.574086 |
| KRTAP19-1   | 21q22.11        | -0.03879 | 0.449649 | 0.574086 |
| ARID4B      | 1q42.3          | -0.03878 | 0.449752 | 0.574181 |
| DAZ4        | Yq11.23         | -0.03878 | 0.449821 | 0.574227 |
| MBD1        | 18q21.1         | 0.038776 | 0.449845 | 0.574227 |
| TRIM42      | 3q23            | -0.03876 | 0.450021 | 0.574371 |
| TMEM14A     | 6p12.2          | -0.03876 | 0.450039 | 0.574371 |
| FUCA2       | 6q24.2          | 0.038759 | 0.450044 | 0.574371 |
| CCDC144A    | 17p11.2         | 0.038751 | 0.450141 | 0.574458 |
| DPEP3       | 16q22.1         | -0.03872 | 0.450464 | 0.574834 |
| USP40       | 2q37.1          | -0.0387  | 0.450737 | 0.575146 |
| OCRL        | Xq26.1          | 0.038693 | 0.450818 | 0.575212 |
| AGPAT4-IT1  | 6q26            | 0.038683 | 0.45093  | 0.575294 |
| OR5J2       | 11q12.1         | -0.03868 | 0.450939 | 0.575294 |
| WFDC12      | 20q13.12        | 0.03868  | 0.450969 | 0.575295 |
| FABP5P3     | 7q36.1          | -0.03866 | 0.451166 | 0.57551  |
| LETM2       | 8p11.23         | 0.038655 | 0.45126  | 0.575593 |
| SNORD115-26 | 15q11.2         | -0.03865 | 0.451295 | 0.575601 |
| SUCO        | 1q24.3          | 0.038623 | 0.451635 | 0.575998 |
| LOC645752   | 15q24.3         | -0.03861 | 0.451803 | 0.57615  |
| EGLN3       | 14q13.1         | -0.03861 | 0.451812 | 0.57615  |
| SLC17A8     | 12q23.1         | -0.0386  | 0.451901 | 0.576169 |
| MAP2K1      | 15q22.31        | 0.038599 | 0.451925 | 0.576169 |
| TSNARE1     | 8q24.3          | 0.038598 | 0.451928 | 0.576169 |
| PGLYRP3     | 1q21.3          | 0.038596 | 0.451959 | 0.576169 |
| NDUFAF3     | 3p21.31         | -0.03859 | 0.451971 | 0.576169 |
| GJB6        | 13q12.11        | -0.03858 | 0.452116 | 0.576317 |
| KNOP1       | 16p12.3         | 0.038566 | 0.452311 | 0.57653  |
| CSH2        | 17q23.3         | -0.03856 | 0.452411 | 0.57662  |
| KLHL15      | Xp22.11         | -0.03855 | 0.452458 | 0.576643 |
| PRAMEF12    | 1p36.21         | 0.038549 | 0.452504 | 0.576665 |

|           |                 |          |          |          |
|-----------|-----------------|----------|----------|----------|
| ZNF605    | 12q24.33        | 0.038535 | 0.452673 | 0.576844 |
| CFAP161   | 15q25.1         | 0.038523 | 0.452807 | 0.576971 |
| MFHAS1    | 8p23.1          | 0.03852  | 0.452847 | 0.576971 |
| OR13A1    | 10q11.21        | 0.038519 | 0.452859 | 0.576971 |
| KDM1A     | 1p36.12         | 0.038509 | 0.452981 | 0.57709  |
| UQCR10    | 22q12.2         | 0.0385   | 0.453082 | 0.577182 |
| DCXR      | 17q25.3         | -0.03847 | 0.453434 | 0.577593 |
| TMEM208   | 16q22.1         | -0.03846 | 0.453601 | 0.577769 |
| PRSS57    | 19p13.3         | 0.038444 | 0.453737 | 0.577906 |
| BMP4      | 14q22.2         | -0.03844 | 0.4538   | 0.57795  |
| RESF1     | 12p11.21        | -0.03842 | 0.45399  | 0.578155 |
| IGLL1     | 22q11.23        | -0.0384  | 0.454205 | 0.578392 |
| SLC41A2   | 12q23.3         | 0.038398 | 0.454276 | 0.578446 |
| CRELD2    | 22q13.33        | 0.038393 | 0.45434  | 0.578489 |
| SERPINB12 | 18q21.33        | -0.03837 | 0.454567 | 0.578742 |
| ANXA10    | 4q32.3          | 0.038358 | 0.454756 | 0.578921 |
| C9ORF16   | 9q34.11         | 0.038357 | 0.454765 | 0.578921 |
| TMEM191A  | 22q11.21        | 0.038339 | 0.454973 | 0.579148 |
| DNAH11    | 7p15.3          | 0.038332 | 0.45506  | 0.579223 |
| ZNF629    | 16p11.2         | 0.038309 | 0.455325 | 0.579523 |
| CLCN3     | 4q33            | 0.038301 | 0.455419 | 0.579606 |
| ARPC1B    | 7q22.1          | 0.038293 | 0.455518 | 0.579667 |
| RIPOR3    | 20q13.13        | 0.038292 | 0.455525 | 0.579667 |
| CBL       | 11q23.3         | 0.03829  | 0.455557 | 0.579671 |
| SYNGR2    | 17q25.3         | -0.03827 | 0.455792 | 0.579933 |
| OR1C1     | 1q44            | 0.038256 | 0.455951 | 0.580099 |
| WBP11P1   | 18q12.1         | -0.03825 | 0.45602  | 0.580149 |
| GPAT2     | 2q11.2          | -0.03825 | 0.456053 | 0.580155 |
| CALML5    | 10p15.1         | 0.03823  | 0.456258 | 0.580379 |
| KRTAP19-5 | 21q22.11        | 0.038222 | 0.456353 | 0.580463 |
| RIPK2     | 8q21.3          | -0.03821 | 0.456484 | 0.580593 |
| CWC27     | 5q12.3          | -0.03817 | 0.456964 | 0.581166 |
| SUPT20H   | 13q13.3         | 0.038159 | 0.457097 | 0.581261 |
| SGSM1     | 22q11.23        | -0.03816 | 0.457097 | 0.581261 |
| CCT4      | 2p15            | -0.03815 | 0.457231 | 0.581395 |
| ATIC      | 2q35            | -0.03814 | 0.457328 | 0.581481 |
| LOC650293 | 4p16.1          | -0.03813 | 0.457466 | 0.581619 |
| GYPA      | 4q31.21         | 0.038125 | 0.457501 | 0.581627 |
| TICAM1    | 19p13.3         | 0.038121 | 0.457546 | 0.581634 |
| TMEM44    | 3q29            | -0.03812 | 0.457564 | 0.581634 |
| KCNIP4    | 4p15.31-p15.2   | -0.03811 | 0.457659 | 0.581718 |
| DMKN      | 19q13.12        | -0.0381  | 0.45774  | 0.581783 |
| HSD17B8   | 6p21.32         | -0.03807 | 0.458126 | 0.582237 |
| DUOXA2    | 15q21.1         | 0.038066 | 0.458194 | 0.582287 |
| ITIH2     | 10p14           | -0.03806 | 0.458302 | 0.582387 |
| HAO1      | 20p12.3         | -0.03805 | 0.458363 | 0.582395 |
| SLC5A10   | 17p11.2         | -0.03805 | 0.458367 | 0.582395 |
| HHLA3     | 1p31.1          | -0.03803 | 0.458617 | 0.582676 |
| SLC25A34  | 1p36.21         | -0.03803 | 0.458671 | 0.582707 |
| ABITRAM   | 9q31.3          | 0.037989 | 0.459106 | 0.583223 |
| EIF1AY    | Yq11.223        | -0.03795 | 0.459543 | 0.583741 |
| PRORP     | 14q13.2         | -0.03795 | 0.459616 | 0.583797 |
| VAX1      | 10q25.3         | 0.037927 | 0.459838 | 0.584042 |
| KCNC1     | 11p15.1         | 0.037917 | 0.459955 | 0.584108 |
| GNAZ      | 22q11.22-q11.23 | 0.037916 | 0.459965 | 0.584108 |
| MEGF6     | 1p36.32         | 0.037915 | 0.459978 | 0.584108 |
| ADAMTS9   | 3p14.1          | -0.03791 | 0.460046 | 0.584159 |
| C8B       | 1p32.2          | -0.03791 | 0.460077 | 0.584161 |

|            |          |          |          |          |
|------------|----------|----------|----------|----------|
| RHCE       | 1p36.11  | 0.037891 | 0.46026  | 0.584329 |
| TULP3      | 12p13.33 | 0.037891 | 0.460268 | 0.584329 |
| ST8SIA5    | 18q21.1  | -0.03788 | 0.460359 | 0.584407 |
| VDAC3      | 8p11.21  | -0.03788 | 0.460437 | 0.584424 |
| CDYL       | 6p25.1   | -0.03788 | 0.460444 | 0.584424 |
| FER1L4     | 20q11.22 | -0.03787 | 0.460462 | 0.584424 |
| CHFR       | 12q24.33 | 0.037872 | 0.460493 | 0.584424 |
| TRIM48     | 11q11    | 0.03787  | 0.460518 | 0.584424 |
| KCNJ11     | 11p15.1  | -0.03784 | 0.460881 | 0.584847 |
| NOTCH4     | 6p21.32  | -0.03783 | 0.460944 | 0.584891 |
| ADORA2B    | 17p12    | -0.03783 | 0.460988 | 0.584909 |
| CNPY1      | 7q36.3   | -0.03783 | 0.461045 | 0.584944 |
| LAMA5      | 20q13.33 | 0.037796 | 0.461391 | 0.585347 |
| KCNA7      | 19q13.33 | 0.037785 | 0.461522 | 0.585475 |
| MFSD4A     | 1q32.1   | -0.03775 | 0.461894 | 0.585911 |
| TMF1       | 3p14.1   | -0.03775 | 0.461933 | 0.585922 |
| AGXT2      | 5p13.2   | 0.037747 | 0.461973 | 0.585936 |
| MLH3       | 14q24.3  | 0.037743 | 0.462017 | 0.585955 |
| C14ORF178  | 14q24.3  | -0.0377  | 0.462559 | 0.586605 |
| MVP        | 16p11.2  | 0.037691 | 0.462633 | 0.586662 |
| FAM66E     | 8p23.1   | -0.03767 | 0.46284  | 0.586823 |
| API5       | 11p12    | -0.03767 | 0.46284  | 0.586823 |
| STC2       | 5q35.2   | 0.037673 | 0.462848 | 0.586823 |
| ADNP       | 20q13.13 | -0.03764 | 0.463214 | 0.58725  |
| FBXO22-AS1 | 15q24.2  | 0.037637 | 0.463281 | 0.587297 |
| GLRA4      | Xq22.2   | -0.03763 | 0.463327 | 0.587318 |
| ADAD2      | 16q24.1  | -0.03762 | 0.46348  | 0.587476 |
| LY6K       | 8q24.3   | -0.03762 | 0.463512 | 0.587478 |
| GRIP2      | 3p25.1   | -0.0376  | 0.463696 | 0.587675 |
| PEX11A     | 15q26.1  | -0.0376  | 0.463744 | 0.587699 |
| C11ORF49   | 11p11.2  | -0.0376  | 0.463775 | 0.5877   |
| SDCBP2     | 20p13    | -0.03757 | 0.464054 | 0.588017 |
| FABP6      | 5q33.3   | -0.03757 | 0.464099 | 0.588037 |
| LDHD       | 16q23.1  | -0.03756 | 0.464238 | 0.588141 |
| ACTN4      | 19q13.2  | 0.037553 | 0.464274 | 0.588141 |
| PSMD7      | 16q23.1  | -0.03755 | 0.464285 | 0.588141 |
| SHFL       | 19p13.2  | 0.03755  | 0.464315 | 0.588141 |
| RPS4Y1     | Yp11.2   | -0.03755 | 0.464358 | 0.588141 |
| SSU72      | 1p36.33  | 0.037546 | 0.464361 | 0.588141 |
| CNNM3      | 2q11.2   | 0.037544 | 0.464387 | 0.588141 |
| CFP        | Xp11.23  | -0.03753 | 0.464608 | 0.588383 |
| RBMY1A1    | Yq11.223 | 0.037511 | 0.464784 | 0.58857  |
| LBX2-AS1   | 2p13.1   | -0.0375  | 0.464964 | 0.588684 |
| LINC00159  | 21q22.11 | 0.037494 | 0.464984 | 0.588684 |
| IQGAP1     | 15q26.1  | 0.037494 | 0.464987 | 0.588684 |
| LYPD5      | 19q13.31 | -0.03749 | 0.464992 | 0.588684 |
| LNPEP      | 5q15     | -0.03748 | 0.465115 | 0.588803 |
| LRRC10B    | 11q12.2  | -0.03748 | 0.465147 | 0.588806 |
| BMP8B      | 1p34.2   | 0.037474 | 0.465226 | 0.588868 |
| HSD52      | 1p32.1   | -0.03746 | 0.465432 | 0.589092 |
| ZNF182     | Xp11.23  | -0.03744 | 0.465567 | 0.589218 |
| FGFR3      | 4p16.3   | 0.037443 | 0.46559  | 0.589218 |
| RPP14      | 3p14.3   | -0.03744 | 0.465634 | 0.589236 |
| CPNE5      | 6p21.2   | 0.037429 | 0.465754 | 0.58933  |
| BIN1       | 2q14.3   | -0.03743 | 0.465767 | 0.58933  |
| NT5C1B     | 2p24.2   | 0.037416 | 0.46591  | 0.589474 |
| GOS2       | 1q32.2   | -0.03739 | 0.466245 | 0.58986  |
| CD19       | 16p11.2  | -0.03736 | 0.466572 | 0.590202 |



|            |              |          |          |          |
|------------|--------------|----------|----------|----------|
| SFTPA2     | 10q22.3      | -0.03736 | 0.466574 | 0.590202 |
| SLC6A19    | 5p15.33      | 0.037344 | 0.466768 | 0.590411 |
| ZNF345     | 19q13.12     | -0.03733 | 0.466954 | 0.590608 |
| TTC32      | 2p24.1       | -0.03732 | 0.467088 | 0.59074  |
| TRIM32     | 9q33.1       | 0.037314 | 0.467129 | 0.590755 |
| KDM2A      | 11q13.2      | 0.037285 | 0.467476 | 0.591135 |
| PRG3       | 11q12.1      | 0.037279 | 0.46755  | 0.591135 |
| OR52N1     | 11p15.4      | 0.037278 | 0.467564 | 0.591135 |
| KRT85      | 12q13.13     | -0.03728 | 0.467575 | 0.591135 |
| QRFP       | 9q34.12      | 0.037276 | 0.467577 | 0.591135 |
| COG8       | 16q22.1      | 0.037262 | 0.467751 | 0.591287 |
| TMEM214    | 2p23.3       | 0.037261 | 0.467757 | 0.591287 |
| DBNL       | 7p13         | 0.037255 | 0.467836 | 0.591323 |
| CXORF56    | Xq24         | -0.03725 | 0.467844 | 0.591323 |
| GRK1       | 13q34        | 0.037234 | 0.468085 | 0.591562 |
| NKX6-3     | 8p11.21      | -0.03723 | 0.468092 | 0.591562 |
| RNU4ATAC   | 2q14.2       | -0.03723 | 0.468134 | 0.591577 |
| UBE2DNL    | Xq21.1       | 0.037222 | 0.468223 | 0.591653 |
| STKLD1     | 9q34.2       | 0.037214 | 0.468319 | 0.591702 |
| OR10H2     | 19p13.12     | 0.037214 | 0.468321 | 0.591702 |
| ZSWIM1     | 20q13.12     | -0.03721 | 0.468387 | 0.591748 |
| POLR2F     | 22q13.1      | 0.037179 | 0.468745 | 0.592163 |
| ZNF100     | 19p12        | 0.037156 | 0.469022 | 0.592476 |
| TANGO2     | 22q11.21     | 0.037147 | 0.469122 | 0.592538 |
| SCGB1C1    | 11p15.5      | -0.03715 | 0.469144 | 0.592538 |
| SETD7      | 4q31.1       | 0.037144 | 0.46916  | 0.592538 |
| ECH1       | 19q13.2      | 0.037133 | 0.469299 | 0.592676 |
| HUS1       | 7p12.3       | -0.03713 | 0.469372 | 0.592728 |
| THUMPD1    | 16p12.3      | -0.03712 | 0.4694   | 0.592728 |
| DRD5       | 4p16.1       | -0.03712 | 0.469466 | 0.592774 |
| DLX2       | 2q31.1       | 0.037116 | 0.469503 | 0.592782 |
| KRT20      | 17q21.2      | -0.03711 | 0.469532 | 0.592782 |
| WDR3       | 1p12         | 0.037106 | 0.469617 | 0.592852 |
| MPZ        | 1q23.3       | -0.03709 | 0.46986  | 0.593123 |
| RGPD1      | 2p11.2       | 0.037056 | 0.47022  | 0.59354  |
| LEKR1      | 3q25.31      | 0.037052 | 0.470259 | 0.593551 |
| IQCG       | 3q29         | 0.037041 | 0.470396 | 0.593686 |
| LINC00242  | 6q27         | -0.03702 | 0.470623 | 0.593936 |
| PEX14      | 1p36.22      | -0.03701 | 0.470742 | 0.594048 |
| PI3        | 20q13.12     | 0.036995 | 0.470948 | 0.594272 |
| CANT1      | 17q25.3      | 0.036985 | 0.471065 | 0.594381 |
| LHFPL3-AS2 | 7q22.2-q22.3 | -0.03698 | 0.471132 | 0.594429 |
| SULT2B1    | 19q13.33     | 0.036971 | 0.471233 | 0.594459 |
| SNORA32    | 11q21        | -0.03697 | 0.471245 | 0.594459 |
| AMELX      | Xp22.2       | -0.03697 | 0.471261 | 0.594459 |
| PRM2       | 16p13.13     | -0.03697 | 0.471275 | 0.594459 |
| UBA7       | 3p21.31      | -0.03696 | 0.471406 | 0.594586 |
| DENND6A    | 3p14.3       | -0.03695 | 0.471527 | 0.594666 |
| ZNF681     | 19p12        | -0.03695 | 0.47153  | 0.594666 |
| RPL21      | 13q12.2      | -0.03694 | 0.471558 | 0.594666 |
| ARMS2      | 10q26.13     | -0.03693 | 0.471727 | 0.594814 |
| GOLGA8IP   | 15q11.2      | -0.03693 | 0.471735 | 0.594814 |
| CSTF2T     | 10q21.1      | 0.036911 | 0.471956 | 0.595056 |
| LIN7C      | 11p14.1      | 0.036888 | 0.472233 | 0.595299 |
| TEKT4P2    | 21p11.2      | -0.03689 | 0.472233 | 0.595299 |
| NPPB       | 1p36.22      | -0.03689 | 0.472238 | 0.595299 |
| IFNL2      | 19q13.2      | -0.03688 | 0.472373 | 0.595432 |
| RPL13A     | 19q13.33     | -0.03687 | 0.472425 | 0.595459 |

|            |                    |          |          |          |
|------------|--------------------|----------|----------|----------|
| TRIM50     | 7q11.23            | -0.03687 | 0.472476 | 0.595486 |
| OR1D2      | 17p13.3            | -0.03686 | 0.472573 | 0.595571 |
| BEND7      | 10p13              | -0.03685 | 0.472733 | 0.595735 |
| EFNA4      | 1q21.3             | -0.03682 | 0.473012 | 0.596049 |
| LOC606724  | 16p11.2            | 0.036815 | 0.473109 | 0.596134 |
| UBQLN3     | 11p15.4            | 0.036794 | 0.47336  | 0.596379 |
| CYTH1      | 17q25.3            | -0.03679 | 0.473375 | 0.596379 |
| LRP4       | 11p11.2            | 0.036792 | 0.473393 | 0.596379 |
| RSPH14     | 22q11.22-q11.23    | -0.03676 | 0.473758 | 0.596801 |
| ANKRD31    | 5q13.3             | -0.03675 | 0.473893 | 0.596934 |
| CMBL       | 5p15.2             | 0.036742 | 0.473991 | 0.59701  |
| KRT6C      | 12q13.13           | 0.03674  | 0.474013 | 0.59701  |
| LINC00167  | 11q24.3            | 0.036718 | 0.474276 | 0.597267 |
| YARS2      | 12p11.21           | 0.036718 | 0.474277 | 0.597267 |
| SUMO1P1    | 20q13.2            | -0.03669 | 0.474661 | 0.597684 |
| B3GAT1     | 11q25              | 0.036686 | 0.474668 | 0.597684 |
| NUP210L    | 1q21.3             | 0.03668  | 0.474736 | 0.597733 |
| LINC01559  | 12p13.1            | -0.03667 | 0.474813 | 0.597768 |
| NDUFB6     | 9p21.1             | 0.036673 | 0.474824 | 0.597768 |
| RPL13      | 16q24.3 17p11.2    | -0.03667 | 0.474863 | 0.59778  |
| PPBP       | 4q13.3             | -0.03666 | 0.474922 | 0.597817 |
| C5ORF58    | 5q35.1             | 0.03665  | 0.475099 | 0.598001 |
| TMC8       | 17q25.3            | 0.036643 | 0.475177 | 0.598062 |
| TTY18      | Yp11.2             | 0.036638 | 0.475247 | 0.598062 |
| SERPINA13P | 14q32.13           | 0.036637 | 0.475249 | 0.598062 |
| H2BFWT     | Xq22.2             | -0.03664 | 0.475267 | 0.598062 |
| ZNF274     | 19q13.43           | 0.036611 | 0.475564 | 0.598399 |
| TMEM272    | 13q14.3            | -0.0366  | 0.475693 | 0.598524 |
| CLNK       | 4p16.1             | -0.0366  | 0.475745 | 0.598551 |
| PSG2       | 19q13.31           | -0.03659 | 0.4758   | 0.598583 |
| SLC25A6    | Xp22.33 and Yp11.2 | -0.03657 | 0.476039 | 0.598846 |
| ZSWIM5     | 1p34.1             | -0.03656 | 0.476198 | 0.599008 |
| CALB1      | 8q21.3             | 0.036525 | 0.476604 | 0.599482 |
| GUCD1      | 22q11.23           | 0.03651  | 0.476788 | 0.599675 |
| ZNF595     | 4p16.3             | -0.03648 | 0.47711  | 0.600043 |
| COL6A5     | 3q22.1             | -0.03648 | 0.477178 | 0.60009  |
| SCGB1A1    | 11q12.3            | -0.03647 | 0.477262 | 0.600159 |
| RBAKDN     | 7p22.1             | 0.036456 | 0.477442 | 0.600347 |
| IFNA13     | 9p21.3             | -0.03643 | 0.477697 | 0.60063  |
| RTRAF      | 14q22.1            | -0.03642 | 0.477894 | 0.60084  |
| OR10A6     | 11p15.4            | 0.036415 | 0.477934 | 0.600852 |
| RASGRF2    | 5q14.1             | -0.03641 | 0.477982 | 0.600862 |
| GJC2       | 1q42.13            | -0.03641 | 0.478003 | 0.600862 |
| BHLHA15    | 7q21.3             | -0.03641 | 0.478031 | 0.600862 |
| GRK7       | 3q23               | -0.03639 | 0.478283 | 0.60114  |
| GAGE2B     | Xp11.23            | -0.03638 | 0.478317 | 0.601146 |
| MOGAT3     | 7q22.1             | 0.036373 | 0.478438 | 0.60126  |
| FBXL12     | 19p13.2            | -0.03636 | 0.478594 | 0.601418 |
| NDUFAF6    | 8q22.1             | -0.03636 | 0.478639 | 0.601419 |
| AGBL3      | 7q33               | -0.03636 | 0.478655 | 0.601419 |
| NXF5       | Xq22.1             | -0.03634 | 0.478894 | 0.601682 |
| FLJ25758   | 19p13.2            | -0.03632 | 0.479109 | 0.601915 |
| EIF4A3     | 17q25.3            | 0.036314 | 0.479162 | 0.601944 |
| GOSR1      | 17q11.2            | 0.036308 | 0.479225 | 0.601985 |
| MT1A       | 16q13              | -0.0363  | 0.479282 | 0.602019 |
| TSBP1      | 6p21.32            | -0.03628 | 0.47952  | 0.602278 |
| HBS1L      | 6q23.3             | 0.036282 | 0.479548 | 0.602278 |
| TSC22D4    | 7q22.1             | 0.036251 | 0.479922 | 0.602708 |

|           |             |          |          |          |
|-----------|-------------|----------|----------|----------|
| OR2A5     | 7q35        | 0.036238 | 0.480081 | 0.602808 |
| PIP5K1C   | 19p13.3     | 0.036238 | 0.480083 | 0.602808 |
| SDHB      | 1p36.13     | 0.036237 | 0.480091 | 0.602808 |
| WBP11     | 12p12.3     | 0.036229 | 0.480183 | 0.602857 |
| FAM83G    | 17p11.2     | 0.036229 | 0.48019  | 0.602857 |
| PHF5A     | 22q13.2     | 0.036192 | 0.480637 | 0.60338  |
| NMB       | 15q25.2     | 0.036189 | 0.480668 | 0.603381 |
| SMYD5     | 2p13.2      | -0.03617 | 0.480906 | 0.603642 |
| SPRED1    | 15q14       | -0.03615 | 0.481128 | 0.603883 |
| SCCPDH    | 1q44        | 0.03613  | 0.481384 | 0.604166 |
| UGT1A4    | 2q37.1      | -0.03612 | 0.481491 | 0.604262 |
| NRL       | 14q11.2-q12 | 0.036093 | 0.481843 | 0.604605 |
| MAST1     | 19p13.13    | 0.036092 | 0.481847 | 0.604605 |
| GAGE12J   | Xp11.23     | -0.03609 | 0.481855 | 0.604605 |
| LINC00341 | 14q32.13    | -0.03608 | 0.481986 | 0.604732 |
| TNKS1BP1  | 11q12.1     | -0.03608 | 0.482054 | 0.604779 |
| UGT1A7    | 2q37.1      | -0.03607 | 0.482148 | 0.604797 |
| PATE3     | 11q24.2     | -0.03607 | 0.48215  | 0.604797 |
| PRSS3     | 9p13.3      | 0.036067 | 0.482158 | 0.604797 |
| METTL1    | 12q14.1     | 0.036063 | 0.482203 | 0.604815 |
| ZSCAN10   | 16p13.3     | 0.036061 | 0.482233 | 0.604815 |
| LAMB3     | 1q32.2      | 0.036035 | 0.482548 | 0.605172 |
| ZNF251    | 8q24.3      | -0.03599 | 0.483122 | 0.605824 |
| MANCR     | 10p15.1     | -0.03599 | 0.483129 | 0.605824 |
| IL15RA    | 10p15.1     | 0.035982 | 0.483187 | 0.605825 |
| BRD7P3    | 6q22.31     | 0.035981 | 0.483202 | 0.605825 |
| CERS3     | 15q26.3     | -0.03598 | 0.48322  | 0.605825 |
| TIMM8B    | 11q23.1     | -0.03597 | 0.483337 | 0.605933 |
| SLC44A2   | 19p13.2     | 0.035965 | 0.483392 | 0.605964 |
| TRA2A     | 7p15.3      | 0.035947 | 0.483609 | 0.606199 |
| USP26     | Xq26.2      | -0.03594 | 0.483676 | 0.606244 |
| ETS2      | 21q22.2     | -0.03592 | 0.483955 | 0.606526 |
| OR7C2     | 19p13.12    | -0.03592 | 0.483961 | 0.606526 |
| HEPHL1    | 11q21       | -0.03592 | 0.484    | 0.606537 |
| HUNK      | 21q22.11    | -0.0359  | 0.48416  | 0.606697 |
| CBS       | 21q22.3     | -0.0359  | 0.484188 | 0.606697 |
| ATP6AP1L  | 5q14.2      | -0.03589 | 0.484327 | 0.606809 |
| RAD1      | 5p13.2      | 0.035888 | 0.484338 | 0.606809 |
| ESX1      | Xq22.2      | -0.03588 | 0.484441 | 0.6069   |
| C6ORF201  | 6p25.2      | 0.035874 | 0.484502 | 0.606938 |
| SLC4A8    | 12q13.13    | -0.03587 | 0.484571 | 0.606987 |
| ZW10      | 11q23.2     | 0.03586  | 0.484671 | 0.607074 |
| P2RY2     | 11q13.4     | 0.035852 | 0.484765 | 0.607118 |
| FAM224B   | Yq11.222    | -0.03585 | 0.484773 | 0.607118 |
| HYKK      | 15q25.1     | -0.03585 | 0.484797 | 0.607118 |
| NOXRED1   | 14q24.3     | 0.035838 | 0.484946 | 0.607209 |
| AK9       | 6q21        | -0.03584 | 0.484965 | 0.607209 |
| USP39     | 2p11.2      | 0.035836 | 0.484968 | 0.607209 |
| ITPKC     | 19q13.2     | -0.03583 | 0.484991 | 0.607209 |
| BBC3      | 19q13.32    | -0.03582 | 0.485151 | 0.607372 |
| GLIPR1L1  | 12q21.2     | -0.03581 | 0.485288 | 0.607505 |
| SLC7A9    | 19q13.11    | -0.03581 | 0.48533  | 0.607519 |
| RAB20     | 13q34       | -0.0358  | 0.485422 | 0.607596 |
| FKRP      | 19q13.32    | -0.03579 | 0.485564 | 0.607736 |
| NIPA2     | 15q11.2     | 0.035767 | 0.48581  | 0.608007 |
| AGPAT3    | 21q22.3     | 0.035747 | 0.486055 | 0.608275 |
| PLAC8     | 4q21.22     | 0.035734 | 0.48621  | 0.608431 |
| ZNF69     | 19p13.2     | 0.03572  | 0.486378 | 0.608603 |

|           |               |          |          |          |
|-----------|---------------|----------|----------|----------|
| CAPN2     | 1q41          | 0.035668 | 0.487017 | 0.609365 |
| FBXO22    | 15q24.2       | -0.03565 | 0.48718  | 0.609531 |
| ZNF573    | 19q13.12      | 0.035646 | 0.487288 | 0.609577 |
| PAPOLA    | 14q32.2       | -0.03564 | 0.487304 | 0.609577 |
| SSX7      | Xp11.22       | -0.03564 | 0.487332 | 0.609577 |
| SCTR      | 2q14.2        | -0.03564 | 0.487351 | 0.609577 |
| STX4      | 16p11.2       | 0.035639 | 0.48737  | 0.609577 |
| PLGLA     | 2q12.2        | -0.03563 | 0.487523 | 0.609703 |
| C5AR2     | 19q13.32      | -0.03563 | 0.487531 | 0.609703 |
| CALR      | 19p13.13      | -0.03562 | 0.487583 | 0.609705 |
| WFDC8     | 20q13.12      | -0.03562 | 0.487594 | 0.609705 |
| MRPL15    | 8q11.23       | -0.03561 | 0.487746 | 0.609858 |
| LSM6      | 4q31.22       | 0.035595 | 0.487904 | 0.610017 |
| OR9G9     | 11q11         | 0.035575 | 0.488157 | 0.610245 |
| HTR6      | 1p36.13       | -0.03557 | 0.488158 | 0.610245 |
| UQCRC2    | 16p12.2       | -0.03557 | 0.488178 | 0.610245 |
| LINC02203 | 15q11.2       | -0.03556 | 0.488282 | 0.610337 |
| TUBA4B    | 2q35          | 0.035553 | 0.48842  | 0.610468 |
| TMEM212   | 3q26.31       | 0.035551 | 0.488447 | 0.610468 |
| OR13C4    | 9q31.1        | -0.03554 | 0.488572 | 0.610549 |
| HIST1H4L  | 6p22.1        | 0.035541 | 0.488573 | 0.610549 |
| UPK2      | 11q23.3       | -0.03553 | 0.488649 | 0.610605 |
| B3GALT1   | 2q24.3        | -0.03553 | 0.488762 | 0.610674 |
| GH2       | 17q23.3       | 0.035522 | 0.488807 | 0.610674 |
| KRIT1     | 7q21.2        | -0.03552 | 0.488855 | 0.610674 |
| SAXO2     | 15q25.2       | 0.035516 | 0.488872 | 0.610674 |
| SDR16C5   | 8q12.1        | 0.035516 | 0.488876 | 0.610674 |
| TCF25     | 16q24.3       | -0.03551 | 0.48891  | 0.610674 |
| IGFALS    | 16p13.3       | 0.035513 | 0.488918 | 0.610674 |
| METAP2    | 12q22         | -0.0355  | 0.489108 | 0.610874 |
| RERE      | 1p36.23       | -0.03549 | 0.489224 | 0.610959 |
| PRDM8     | 4q21.21       | -0.03549 | 0.489237 | 0.610959 |
| PRMT3     | 11p15.1       | -0.03547 | 0.489438 | 0.611172 |
| DOCK7     | 1p31.3        | -0.03546 | 0.489538 | 0.611259 |
| PSMA1     | 11p15.2       | -0.03546 | 0.489607 | 0.611306 |
| MALT1     | 18q21.32      | -0.03545 | 0.489694 | 0.611377 |
| MKLN1     | 7q32.3        | -0.03543 | 0.489881 | 0.611566 |
| CCDC83    | 11q14.1-q14.2 | 0.035432 | 0.489907 | 0.611566 |
| SH2D7     | 15q25.1       | -0.03542 | 0.490068 | 0.611722 |
| ITGAX     | 16p11.2       | -0.03542 | 0.490092 | 0.611722 |
| MADCAM1   | 19p13.3       | -0.0354  | 0.490242 | 0.611871 |
| MFN1      | 3q26.33       | -0.03539 | 0.490467 | 0.612113 |
| LINC00326 | 6q23.2        | 0.035365 | 0.490727 | 0.6124   |
| TFF2      | 21q22.3       | 0.035349 | 0.490924 | 0.612605 |
| PDE4A     | 19p13.2       | -0.03535 | 0.490953 | 0.612605 |
| KLK11     | 19q13.41      | -0.03531 | 0.491415 | 0.613144 |
| LINC01551 | 14q12         | 0.035304 | 0.491473 | 0.613177 |
| OTOR      | 20p12.1       | -0.0353  | 0.491529 | 0.613194 |
| SPHK2     | 19q13.33      | 0.035298 | 0.491548 | 0.613194 |
| KRT16     | 17q21.2       | -0.03529 | 0.491594 | 0.613201 |
| TFEB      | 6p21.1        | -0.03529 | 0.491614 | 0.613201 |
| MYH6      | 14q11.2       | -0.03528 | 0.491798 | 0.613393 |
| FGF7P6    | 9q13          | -0.03527 | 0.491913 | 0.613498 |
| RSPH4A    | 6q22.1        | -0.03526 | 0.492054 | 0.613613 |
| CCDC190   | 1q23.3        | 0.035256 | 0.492067 | 0.613613 |
| MKRN2     | 3p25.2        | -0.03524 | 0.492225 | 0.613753 |
| FLNC      | 7q32.1        | -0.03524 | 0.492241 | 0.613753 |
| LYPD6B    | 2q23.2        | -0.03523 | 0.492325 | 0.61382  |

|           |                 |          |          |          |
|-----------|-----------------|----------|----------|----------|
| SLC2A7    | 1p36.23         | -0.03523 | 0.492414 | 0.613893 |
| TFCP2     | 12q13.12-q13.13 | 0.035214 | 0.492577 | 0.614022 |
| NMNAT1    | 1p36.22         | 0.035214 | 0.492579 | 0.614022 |
| PDLIM1    | 10q23.33        | -0.0352  | 0.492712 | 0.614149 |
| BRDT      | 1p22.1          | 0.035194 | 0.492832 | 0.614261 |
| LCE1D     | 1q21.3          | -0.03519 | 0.492894 | 0.6143   |
| GAGE2A    | Xp11.23         | 0.035178 | 0.493021 | 0.61442  |
| DCAF13P3  | 15q21.2         | -0.03517 | 0.493095 | 0.614474 |
| PTDSS2    | 11p15.5         | -0.03514 | 0.493445 | 0.614863 |
| CRYBA1    | 17q11.2         | -0.03514 | 0.493468 | 0.614863 |
| AFG1L     | 6q21            | 0.035137 | 0.493525 | 0.614895 |
| ZNF404    | 19q13.31        | 0.035127 | 0.493646 | 0.615008 |
| FAM117B   | 2q33.2          | 0.035105 | 0.493925 | 0.615317 |
| PDIA5     | 3q21.1          | -0.0351  | 0.494012 | 0.615387 |
| VN1R4     | 19q13.42        | -0.03508 | 0.494277 | 0.615525 |
| OR5T3     | 11q12.1         | -0.03508 | 0.494277 | 0.615525 |
| SPINT3    | 20q13.12        | -0.03508 | 0.494277 | 0.615525 |
| OR4A5     | 11q11           | -0.03508 | 0.494277 | 0.615525 |
| KRTAP13-3 | 21q22.11        | -0.03508 | 0.494277 | 0.615525 |
| TLCD1     | 17q11.2         | -0.03507 | 0.494399 | 0.61564  |
| TTC12     | 11q23.2         | -0.03504 | 0.49476  | 0.616051 |
| TTC21B    | 2q24.3          | -0.03503 | 0.494845 | 0.616118 |
| OR51Q1    | 11p15.4         | 0.035004 | 0.495165 | 0.616478 |
| CMC4      | Xq28            | 0.034988 | 0.495365 | 0.616672 |
| MGAM      | 7q34            | 0.034987 | 0.495382 | 0.616672 |
| SLC26A5   | 7q22.1          | 0.034983 | 0.49543  | 0.616693 |
| DRG1      | 22q12.2         | -0.03498 | 0.495506 | 0.616749 |
| SRFBP1    | 5q23.1          | -0.03497 | 0.495596 | 0.616823 |
| XAGE5     | Xp11.22         | -0.03497 | 0.495634 | 0.616833 |
| GPN2      | 1p36.11         | 0.034954 | 0.495785 | 0.616981 |
| OR5AN1    | 11q12.1         | 0.034947 | 0.495875 | 0.617056 |
| OR2J2     | 6p22.1          | -0.03494 | 0.495964 | 0.617127 |
| OR7E24    | 19p13.2         | 0.034934 | 0.496029 | 0.61717  |
| SMCP      | 1q21.3          | -0.03493 | 0.496064 | 0.617175 |
| HBZ       | 16p13.3         | 0.034929 | 0.496096 | 0.617177 |
| USP37     | 2q35            | 0.034904 | 0.496401 | 0.617518 |
| ZNF766    | 19q13.41        | -0.03489 | 0.496523 | 0.617632 |
| RAB22A    | 20q13.32        | -0.03488 | 0.496653 | 0.617755 |
| ANAPC5    | 12q24.31        | 0.034878 | 0.496725 | 0.617798 |
| ZNF330    | 4q31.21         | -0.03488 | 0.496749 | 0.617798 |
| MCUB      | 4q25            | 0.034844 | 0.49714  | 0.618245 |
| FTHL17    | Xp21.2          | 0.034839 | 0.497202 | 0.618284 |
| ELL       | 19p13.11        | 0.03483  | 0.497316 | 0.618362 |
| MAPK11    | 22q13.33        | -0.03483 | 0.497326 | 0.618362 |
| CXORF65   | Xq13.1          | 0.034815 | 0.497501 | 0.618541 |
| MGST2     | 4q31.1          | -0.03481 | 0.497616 | 0.618645 |
| C3ORF70   | 3q27.2          | 0.034783 | 0.49789  | 0.618948 |
| MUC21     | 6p21.33         | -0.03474 | 0.498467 | 0.619609 |
| TBC1D3P2  | 17q23.2         | 0.034735 | 0.498484 | 0.619609 |
| ASB10     | 7q36.1          | -0.03471 | 0.498857 | 0.620033 |
| IFNA1     | 9p21.3          | -0.03469 | 0.499002 | 0.620176 |
| PDIA3P1   | 1q21.1          | -0.03469 | 0.499044 | 0.620189 |
| LEUTX     | 19q13.2         | 0.034674 | 0.499241 | 0.620396 |
| CRCP      | 7q11.21         | -0.03467 | 0.499294 | 0.620423 |
| CLCA4     | 1p22.3          | 0.034659 | 0.499433 | 0.620557 |
| ADCY4     | 14q12           | 0.034641 | 0.499658 | 0.620798 |
| RPL8      | 8q24.3          | -0.03459 | 0.500265 | 0.621497 |
| HMX1      | 4p16.1          | -0.03459 | 0.500282 | 0.621497 |

|           |                        |          |          |          |
|-----------|------------------------|----------|----------|----------|
| MOCS2     | 5q11.2                 | -0.03455 | 0.500839 | 0.62215  |
| TMSB10    | 2p11.2                 | -0.03453 | 0.500991 | 0.622252 |
| EIF3J     | 15q21.1                | 0.034531 | 0.501012 | 0.622252 |
| EIF3D     | 22q12.3                | -0.03453 | 0.501031 | 0.622252 |
| OR13C8    | 9q31.1                 | 0.034529 | 0.501046 | 0.622252 |
| IRF7      | 11p15.5                | 0.034525 | 0.50109  | 0.622269 |
| QRICH1    | 3p21.31                | 0.034511 | 0.501269 | 0.622452 |
| EXO5      | 1p34.2                 | 0.034507 | 0.501314 | 0.62247  |
| WDR38     | 9q33.3                 | -0.0345  | 0.501418 | 0.622556 |
| DDX25     | 11q24.2                | -0.0345  | 0.501446 | 0.622556 |
| SHC3      | 9q22.1                 | -0.03449 | 0.501516 | 0.622605 |
| ACTL9     | 19p13.2                | 0.034488 | 0.501548 | 0.622606 |
| NFYC      | 1p34.2                 | 0.034471 | 0.501758 | 0.622794 |
| TOP1MT    | 8q24.3                 | -0.03447 | 0.501779 | 0.622794 |
| PTGS2     | 1q31.1                 | 0.034468 | 0.501793 | 0.622794 |
| OR5AK2    | 11q12.1                | 0.034456 | 0.501941 | 0.62294  |
| TMEM222   | 1p36.11                | -0.03444 | 0.502164 | 0.623178 |
| TRH       | 3q22.1                 | -0.03443 | 0.502259 | 0.62322  |
| RAB40B    | 17q25.3                | -0.03443 | 0.50226  | 0.62322  |
| RAB4B     | 19q13.2                | -0.03442 | 0.502381 | 0.623309 |
| OR9A2     | 7q34                   | 0.03442  | 0.502394 | 0.623309 |
| ANKRD19P  | 9q22.31                | 0.034403 | 0.5026   | 0.623525 |
| DNAJC13   | 3q22.1                 | 0.034393 | 0.502731 | 0.623649 |
| DAPP1     | 4q23                   | -0.03438 | 0.502924 | 0.623785 |
| PLA2G2A   | 1p36.13                | 0.034376 | 0.50294  | 0.623785 |
| ALPK1     | 4q25                   | 0.034372 | 0.502985 | 0.623785 |
| CHRNA2    | 1q21.3                 | -0.03437 | 0.502988 | 0.623785 |
| BRSK2     | 11p15.5                | -0.03437 | 0.502996 | 0.623785 |
| HIF1AN    | 10q24.31               | 0.034369 | 0.503028 | 0.623786 |
| OR3A3     | 17p13.2                | 0.034349 | 0.503279 | 0.624058 |
| MKNK1     | 1p33                   | 0.034343 | 0.503349 | 0.624076 |
| PMS2CL    | 7p22.1                 | 0.034341 | 0.503371 | 0.624076 |
| CRTC1     | 19p13.11               | 0.03434  | 0.503387 | 0.624076 |
| ATOX1     | 10q21.3 10q21.3-q22.1  | 0.034337 | 0.503429 | 0.624089 |
| LINC02396 | 12q13.12               | 0.034329 | 0.503527 | 0.624173 |
| RHOBTB3   | 5q15                   | -0.03431 | 0.503743 | 0.624402 |
| TEX29     | 13q34                  | -0.0343  | 0.503847 | 0.624492 |
| PISD      | 22q12.2                | 0.034298 | 0.503914 | 0.624508 |
| CFAP299   | 4q21.21                | -0.0343  | 0.503922 | 0.624508 |
| MTIF3     | 13q12.2                | -0.03429 | 0.503955 | 0.62451  |
| ZNF879    | 5q35.3                 | -0.03429 | 0.504054 | 0.624543 |
| UBE2V2    | 8q11.21                | -0.03429 | 0.504067 | 0.624543 |
| ITGAE     | 17p13.2                | -0.03428 | 0.504075 | 0.624543 |
| SLITRK1   | 13q31.1                | 0.034257 | 0.504421 | 0.624933 |
| PABPN1L   | 16q24.3                | 0.03424  | 0.504628 | 0.62515  |
| ATP12A    | 13q12.12 13q12.1-q12.3 | -0.03424 | 0.504658 | 0.62515  |
| KXD1      | 19p13.11               | 0.034213 | 0.504965 | 0.625491 |
| ADGRF2    | 6p12.3                 | -0.0342  | 0.505101 | 0.625621 |
| SSBP1     | 7q34                   | 0.034183 | 0.505341 | 0.625878 |
| C3ORF33   | 3q25.31                | -0.03418 | 0.505429 | 0.625937 |
| KRT32     | 17q21.2                | -0.03417 | 0.505451 | 0.625937 |
| ARC       | 8q24.3                 | -0.03417 | 0.505544 | 0.625994 |
| CACNA1S   | 1q32.1                 | -0.03417 | 0.505559 | 0.625994 |
| SNAR-I    | 3q28                   | -0.03415 | 0.505791 | 0.626243 |
| LYN       | 8q12.1                 | 0.034132 | 0.505974 | 0.626416 |
| A4GNT     | 3q22.3                 | 0.034131 | 0.505993 | 0.626416 |
| RNF138    | 18q12.1                | 0.034123 | 0.506087 | 0.626493 |
| ZBP1      | 20q13.31               | -0.03411 | 0.506234 | 0.626637 |

|           |                  |          |          |          |
|-----------|------------------|----------|----------|----------|
| VIT       | 2p22.2           | -0.0341  | 0.506426 | 0.626828 |
| GLUD1     | 10q23.2          | 0.034094 | 0.506452 | 0.626828 |
| FGF20     | 8p22             | -0.03408 | 0.506618 | 0.626996 |
| GCC1      | 7q32.1           | -0.03408 | 0.506664 | 0.627014 |
| NAGPA     | 16p13.3          | -0.03405 | 0.506946 | 0.627324 |
| GC        | 4q13.3           | -0.03405 | 0.507039 | 0.627396 |
| LINC00930 | 15q26.1          | 0.034045 | 0.507067 | 0.627396 |
| TRAF1     | 9q33.2           | 0.034039 | 0.507137 | 0.627444 |
| TRIM69    | 15q21.1          | -0.03403 | 0.507231 | 0.627474 |
| CPVL      | 7p14.3           | -0.03403 | 0.507234 | 0.627474 |
| KBTBD7    | 13q14.11         | -0.03403 | 0.507255 | 0.627474 |
| XAF1      | 17p13.1          | 0.034027 | 0.507296 | 0.627485 |
| REV3L     | 6q21             | 0.034018 | 0.5074   | 0.627554 |
| TMPRSS3   | 21q22.3          | 0.034017 | 0.507414 | 0.627554 |
| HTATSF1   | Xq26.3           | 0.034011 | 0.507494 | 0.627615 |
| RUFY4     | 2q35             | 0.034003 | 0.507585 | 0.627688 |
| LHX9      | 1q31.3           | -0.034   | 0.507639 | 0.627716 |
| NPFFR1    | 10q22.1          | 0.033993 | 0.507711 | 0.627766 |
| HOXC11    | 12q13.13         | 0.033984 | 0.507827 | 0.627871 |
| SPINK4    | 9p13.3           | 0.033978 | 0.507902 | 0.627904 |
| OR1K1     | 9q33.2           | 0.033977 | 0.507917 | 0.627904 |
| TUBA3FP   | 22q11.21         | -0.03396 | 0.508141 | 0.628131 |
| LINC00461 | 5q14.3           | -0.03396 | 0.508163 | 0.628131 |
| KLRG2     | 7q34             | -0.03393 | 0.50846  | 0.628441 |
| WFDC11    | 20q13.12         | 0.033932 | 0.508476 | 0.628441 |
| AHNAK     | 11q12.3          | -0.03391 | 0.508813 | 0.628818 |
| TMEM109   | 11q12.2          | -0.03389 | 0.509017 | 0.629032 |
| SPEF1     | 20p13            | 0.033885 | 0.509069 | 0.629057 |
| GCFC2     | 2p12             | -0.03387 | 0.509287 | 0.629287 |
| NUDCD3    | 7p13             | -0.03386 | 0.509395 | 0.629381 |
| ZNF697    | 1p12             | -0.03384 | 0.509661 | 0.629672 |
| WFS1      | 4p16.1           | -0.03383 | 0.509809 | 0.629757 |
| RPL26L1   | 5q35.1           | -0.03383 | 0.509812 | 0.629757 |
| POTEM     | 14q11.2          | -0.03382 | 0.509824 | 0.629757 |
| TSR2      | Xp11.22          | -0.03381 | 0.510031 | 0.629973 |
| ABHD12B   | 14q22.1          | 0.033798 | 0.510156 | 0.630089 |
| LGALS2    | 22q13.1          | 0.033788 | 0.510281 | 0.630205 |
| BHLHE23   | 20q13.33         | -0.03378 | 0.510386 | 0.630295 |
| ZNF92     | 7q11.21          | -0.03377 | 0.510451 | 0.630337 |
| HAP1      | 17q21.2          | -0.03375 | 0.510749 | 0.630632 |
| PFKFB1    | Xp11.21          | -0.03375 | 0.510753 | 0.630632 |
| TMEM125   | 1p34.2           | -0.03374 | 0.510831 | 0.63069  |
| SLC39A8   | 4q24             | 0.033741 | 0.510867 | 0.630694 |
| UBE2K     | 4p14             | -0.03372 | 0.511074 | 0.630877 |
| VPS4A     | 16q22.1          | 0.033723 | 0.511093 | 0.630877 |
| KSR2      | 12q24.22-q24.23  | -0.03372 | 0.511123 | 0.630877 |
| ARVCF     | 22q11.21         | 0.033719 | 0.511144 | 0.630877 |
| IFITM1    | 11p15.5          | -0.03372 | 0.51119  | 0.630877 |
| NAB1      | 2q32.2           | 0.033714 | 0.511204 | 0.630877 |
| IL12RB2   | 1p31.3           | -0.03371 | 0.511267 | 0.630917 |
| YBEY      | 21q22.3          | -0.0337  | 0.511333 | 0.630953 |
| LOC389705 | 9p22.3           | -0.0337  | 0.511375 | 0.630953 |
| OR13C5    | 9q31.1           | -0.0337  | 0.511391 | 0.630953 |
| KPNA1     | 3q21.1           | -0.03369 | 0.511552 | 0.631113 |
| SLC25A48  | 5q31.1           | 0.033679 | 0.511646 | 0.63119  |
| MICALL1   | 22q13.1          | 0.033674 | 0.511711 | 0.63123  |
| TXLNKY    | Yq11.222-q11.223 | -0.03367 | 0.511754 | 0.63123  |
| PEX16     | 11p11.2          | -0.03367 | 0.511773 | 0.63123  |

|              |                |          |          |          |
|--------------|----------------|----------|----------|----------|
| DRC3         | 17p11.2        | -0.03365 | 0.51203  | 0.631508 |
| USPL1        | 13q12.3        | -0.03364 | 0.512076 | 0.631526 |
| KCTD9        | 8p21.2         | 0.033622 | 0.512354 | 0.63183  |
| OR6B2        | 2q37.3         | 0.033609 | 0.51252  | 0.631979 |
| MSX2         | 5q35.2         | -0.03361 | 0.512538 | 0.631979 |
| SPRR3        | 1q21.3         | 0.033596 | 0.512687 | 0.632124 |
| TTY1B        | Yp11.2         | 0.033566 | 0.513058 | 0.632542 |
| UGT1A1       | 2q37.1         | 0.033556 | 0.513188 | 0.632664 |
| PCDH11Y      | Yp11.2         | -0.03355 | 0.513271 | 0.632703 |
| OR2AG2       | 11p15.4        | -0.03355 | 0.513283 | 0.632703 |
| ZFYVE26      | 14q24.1        | 0.033535 | 0.513455 | 0.632837 |
| CYB5R4       | 6q14.2         | -0.03353 | 0.513463 | 0.632837 |
| ASB9         | Xp22.2         | 0.033532 | 0.513487 | 0.632837 |
| CDK19        | 6q21           | -0.0335  | 0.513917 | 0.633298 |
| SMN2         | 5q13.2         | 0.033495 | 0.513961 | 0.633298 |
| IFI27        | 14q32.12       | 0.033494 | 0.513969 | 0.633298 |
| CABP7        | 22q12.2        | 0.033492 | 0.513988 | 0.633298 |
| TREML4       | 6p21.1         | 0.033465 | 0.514334 | 0.633686 |
| UBE2L3       | 22q11.21       | 0.033461 | 0.514386 | 0.633711 |
| NCOA6        | 20q11.22       | 0.033445 | 0.514589 | 0.633922 |
| ZNF517       | 8q24.3         | -0.03344 | 0.514667 | 0.63398  |
| ROBO4        | 11q24.2        | -0.03343 | 0.514789 | 0.634057 |
| ANO2         | 12p13.31       | 0.033428 | 0.514793 | 0.634057 |
| SSX1         | Xp11.23        | 0.03342  | 0.514894 | 0.634118 |
| ZNF253       | 19p13.11       | -0.03342 | 0.514935 | 0.634118 |
| SMARCB1      | 22q11.23 22q11 | -0.03342 | 0.514938 | 0.634118 |
| MESP2        | 15q26.1        | 0.033414 | 0.514971 | 0.63412  |
| HPS1         | 10q24.2        | 0.033404 | 0.515101 | 0.63424  |
| DNMBP-AS1    | 10q24.2        | 0.033397 | 0.515187 | 0.634306 |
| ABCC5        | 3q27.1         | 0.033395 | 0.515217 | 0.634306 |
| INTS4P1      | 7q11.21        | 0.033388 | 0.515298 | 0.634361 |
| HIST3H2A     | 1q42.13        | 0.033386 | 0.515326 | 0.634361 |
| SLC5A11      | 16p12.1        | -0.03337 | 0.515569 | 0.634622 |
| PAWR         | 12q21.2        | 0.033363 | 0.515616 | 0.63464  |
| TTLL2        | 6q27           | 0.033358 | 0.515673 | 0.634672 |
| FOXA2        | 20p11.21       | 0.033351 | 0.51577  | 0.634727 |
| RPL14        | 3p22.1         | -0.03335 | 0.515795 | 0.634727 |
| NPHS1        | 19q13.12       | 0.033347 | 0.515812 | 0.634727 |
| LILRA3       | 19q13.4        | -0.03332 | 0.516136 | 0.635086 |
| KLRC4        | 12p13.2        | 0.033318 | 0.516185 | 0.635107 |
| XDH          | 2p23.1         | -0.03331 | 0.516253 | 0.635114 |
| VMA21        | Xq28           | 0.033312 | 0.516264 | 0.635114 |
| C12ORF49     | 12q24.22       | -0.03331 | 0.516285 | 0.635114 |
| LRGUK        | 7q33           | -0.0333  | 0.516423 | 0.635244 |
| LOC100133050 | 5q21.1         | 0.033292 | 0.516514 | 0.635256 |
| CWH43        | 4p11           | -0.03329 | 0.51653  | 0.635256 |
| HOXD3        | 2q31.1         | 0.03329  | 0.51654  | 0.635256 |
| CHRAC1       | 8q24.3         | -0.03329 | 0.516559 | 0.635256 |
| ZADH2        | 18q22.3        | 0.033276 | 0.516717 | 0.63541  |
| SERHL        | 22q13.2        | 0.03326  | 0.516912 | 0.635611 |
| PRAMEF4      | 1p36.21        | -0.03325 | 0.517077 | 0.63577  |
| SGK2         | 20q13.12       | 0.033245 | 0.517105 | 0.63577  |
| ZPR1         | 11q23.3        | -0.03322 | 0.517439 | 0.636101 |
| ZNF337       | 20p11.21       | 0.033217 | 0.517455 | 0.636101 |
| AEBP2        | 12p12.3        | -0.03322 | 0.517469 | 0.636101 |
| ESD          | 13q14.2        | -0.03321 | 0.517521 | 0.636125 |
| MYO9A        | 15q23          | 0.033206 | 0.517597 | 0.636179 |
| SLC25A18     | 22q11.21       | -0.0332  | 0.517731 | 0.636305 |



|           |          |          |          |          |
|-----------|----------|----------|----------|----------|
| CFAP58    | 10q25.1  | 0.033187 | 0.517832 | 0.636376 |
| CTDNEP1   | 17p13.1  | -0.03319 | 0.517852 | 0.636376 |
| TAS2R41   | 7q35     | 0.033163 | 0.518132 | 0.636681 |
| FAM169A   | 5q13.3   | -0.03314 | 0.518385 | 0.636953 |
| USP22     | 17p11.2  | -0.03313 | 0.518553 | 0.637121 |
| ASL       | 7q11.21  | 0.033126 | 0.518608 | 0.637148 |
| ZNF609    | 15q22.31 | 0.033118 | 0.518703 | 0.637196 |
| HYPM      | Xp11.4   | -0.03312 | 0.51871  | 0.637196 |
| USP15     | 12q14.1  | -0.03311 | 0.518852 | 0.637332 |
| CFTR      | 7q31.2   | -0.03309 | 0.519073 | 0.637563 |
| ABCA17P   | 16p13.3  | 0.033086 | 0.519112 | 0.637573 |
| RACK1     | 5q35.3   | -0.03308 | 0.519195 | 0.637635 |
| DIMT1     | 5q12.1   | 0.033074 | 0.51926  | 0.637676 |
| CDK8      | 13q12.13 | -0.03307 | 0.519369 | 0.637771 |
| SPATA32   | 17q21.31 | 0.033062 | 0.51942  | 0.637794 |
| CCDC85B   | 11q13.1  | 0.033048 | 0.519592 | 0.637967 |
| LINC01591 | 8q24.22  | -0.03304 | 0.519708 | 0.638069 |
| LINGO1    | 15q24.3  | 0.033023 | 0.519908 | 0.638276 |
| TMEM131L  | 4q31.3   | -0.03302 | 0.519956 | 0.638296 |
| ST7-AS1   | 7q31.2   | 0.033014 | 0.520017 | 0.638332 |
| CIITA     | 16p13.13 | -0.03301 | 0.52008  | 0.638347 |
| SHD       | 19p13.3  | 0.033008 | 0.520093 | 0.638347 |
| ATP5PO    | 21q22.11 | 0.033002 | 0.520167 | 0.638398 |
| NR4A1     | 12q13.13 | 0.032996 | 0.520251 | 0.638408 |
| ZNF547    | 19q13.43 | -0.033   | 0.520254 | 0.638408 |
| BCO2      | 11q23.1  | 0.032994 | 0.52027  | 0.638408 |
| PIH1D3    | Xq22.3   | -0.03296 | 0.520664 | 0.638851 |
| MTMR4     | 17q22    | 0.032953 | 0.520793 | 0.638971 |
| SATB2-AS1 | 2q33.1   | 0.032916 | 0.521265 | 0.63951  |
| ZBTB8OS   | 1p35.1   | -0.03289 | 0.521538 | 0.639806 |
| MRAP      | 21q22.11 | -0.03288 | 0.521751 | 0.640029 |
| PLEKHM2   | 1p36.21  | -0.03287 | 0.521821 | 0.640075 |
| TMEM53    | 1p34.1   | -0.03287 | 0.521862 | 0.640086 |
| PRY2      | Yq11.223 | 0.032865 | 0.521909 | 0.640105 |
| ZNF449    | Xq26.3   | -0.03283 | 0.522348 | 0.640591 |
| UCK1      | 9q34.13  | 0.032829 | 0.52237  | 0.640591 |
| PWAR1     | 15q11.2  | -0.03281 | 0.522649 | 0.640869 |
| FOXB2     | 9q21.2   | 0.032806 | 0.52266  | 0.640869 |
| CABP1     | 12q24.31 | 0.032795 | 0.522799 | 0.641    |
| OPN1SW    | 7q32.1   | -0.03279 | 0.522855 | 0.64103  |
| RPL18     | 19q13.33 | 0.032788 | 0.522888 | 0.641031 |
| SDAD1     | 4q21.1   | -0.03278 | 0.522984 | 0.641109 |
| LINC00574 | 6q27     | 0.03277  | 0.523106 | 0.641219 |
| DDX4      | 5q11.2   | -0.03275 | 0.523311 | 0.641402 |
| POU4F3    | 5q32     | 0.032754 | 0.523319 | 0.641402 |
| GFER      | 16p13.3  | -0.03274 | 0.523476 | 0.641551 |
| TRIM67    | 1q42.2   | 0.032739 | 0.523504 | 0.641551 |
| ACO2      | 22q13.2  | 0.032736 | 0.523549 | 0.641567 |
| SNAI3     | 16q24.2  | -0.03273 | 0.52362  | 0.641588 |
| B4GALT7   | 5q35.3   | 0.032729 | 0.523631 | 0.641588 |
| ATF7IP    | 12p13.1  | -0.03271 | 0.523829 | 0.64176  |
| SI        | 3q26.1   | 0.032713 | 0.523835 | 0.64176  |
| MAGI1     | 3p14.1   | -0.0327  | 0.523997 | 0.641919 |
| CSNK1A1P1 | 15q14    | -0.0327  | 0.524033 | 0.641924 |
| CCDC87    | 11q13.2  | 0.032683 | 0.52422  | 0.64207  |
| AMHR2     | 12q13.13 | -0.03268 | 0.524237 | 0.64207  |
| SCUBE1    | 22q13.2  | -0.03268 | 0.524258 | 0.64207  |
| NEDD9     | 6p24.2   | -0.03268 | 0.524306 | 0.64207  |

|           |               |          |          |          |
|-----------|---------------|----------|----------|----------|
| ADO       | 10q21.3       | -0.03267 | 0.524323 | 0.64207  |
| LNX2      | 13q12.2       | -0.03267 | 0.524345 | 0.64207  |
| RRN3P3    | 16p12.2       | 0.032663 | 0.524473 | 0.642188 |
| COTL1     | 16q24.1       | -0.03265 | 0.524684 | 0.642305 |
| PARP4     | 13q12.12      | 0.032646 | 0.524687 | 0.642305 |
| SERPINB13 | 18q21.33      | -0.03265 | 0.524689 | 0.642305 |
| LRP6      | 12p13.2       | -0.03265 | 0.524697 | 0.642305 |
| USP34     | 2p15          | -0.03263 | 0.52493  | 0.642551 |
| SNHG5     | 6q14.3        | -0.03262 | 0.525042 | 0.642649 |
| USP46     | 4q12          | -0.03261 | 0.525097 | 0.642677 |
| ARL5B     | 10p12.31      | 0.032605 | 0.525212 | 0.642757 |
| TBCB      | 19q13.12      | -0.0326  | 0.52525  | 0.642757 |
| MECR      | 1p35.3        | 0.0326   | 0.525275 | 0.642757 |
| MMP10     | 11q22.2       | 0.032598 | 0.525291 | 0.642757 |
| TLE5      | 19p13.3       | -0.03258 | 0.525521 | 0.642999 |
| LRRC8D    | 1p22.2        | -0.03257 | 0.525601 | 0.643057 |
| DSC2      | 18q12.1       | -0.03255 | 0.525926 | 0.643417 |
| PGGT1B    | 5q22.3        | 0.032543 | 0.525999 | 0.643458 |
| NOX5      | 15q23         | -0.03254 | 0.526025 | 0.643458 |
| TMCO1     | 1q24.1        | -0.03253 | 0.526209 | 0.643644 |
| YIF1A     | 11q13.2       | -0.03252 | 0.526291 | 0.643666 |
| RNASEH2B  | 13q14.3       | -0.03252 | 0.526291 | 0.643666 |
| ATP8B3    | 19p13.3       | -0.03251 | 0.526419 | 0.643784 |
| SZRD1     | 1p36.13       | 0.032502 | 0.526521 | 0.643868 |
| VPREB1    | 22q11.22      | -0.03248 | 0.526828 | 0.644205 |
| CCRL2     | 3p21.31       | -0.03248 | 0.526861 | 0.644205 |
| DDX11L2   | 2q14.1        | 0.03247  | 0.526925 | 0.644245 |
| GALK2     | 15q21.1-q21.2 | 0.032464 | 0.527001 | 0.644298 |
| IGFLR1    | 19q13.12      | -0.03246 | 0.527047 | 0.644315 |
| RND1      | 12q13.12      | -0.03245 | 0.527176 | 0.644433 |
| HSD17B1   | 17q21.2       | 0.032442 | 0.527277 | 0.644499 |
| HDHD2     | 18q21.1       | -0.03244 | 0.527294 | 0.644499 |
| WBP2NL    | 22q13.2       | -0.03239 | 0.527918 | 0.645222 |
| CNST      | 1q44          | -0.03237 | 0.528202 | 0.64553  |
| LIPJ      | 10q23.31      | 0.032366 | 0.528249 | 0.645548 |
| JADE2     | 5q31.1        | -0.03235 | 0.528466 | 0.645773 |
| ATPAF1    | 1p33          | 0.032333 | 0.528677 | 0.645992 |
| FAM110C   | 2p25.3        | 0.032328 | 0.528739 | 0.646028 |
| ZNF146    | 19q13.12      | -0.03231 | 0.528921 | 0.646145 |
| KLK10     | 19q13.41      | 0.032312 | 0.528943 | 0.646145 |
| NIP7      | 16q22.1       | -0.03231 | 0.528954 | 0.646145 |
| C11ORF16  | 11p15.4       | -0.03231 | 0.528963 | 0.646145 |
| PANK1     | 10q23.31      | -0.03229 | 0.529177 | 0.646366 |
| DEFB135   | 8p23.1        | -0.03229 | 0.529235 | 0.646399 |
| TSTD2     | 9q22.33       | -0.03229 | 0.52927  | 0.646402 |
| KIAA0754  | 1p34.3        | 0.032272 | 0.529449 | 0.646541 |
| SMIM24    | 19p13.3       | 0.032272 | 0.529449 | 0.646541 |
| KREMEN1   | 22q12.1       | -0.03226 | 0.529551 | 0.646616 |
| AKAP1     | 17q22         | 0.032262 | 0.529575 | 0.646616 |
| RXFP4     | 1q22          | 0.032259 | 0.529614 | 0.646624 |
| UNQ6494   | 9q22.2        | -0.03225 | 0.529729 | 0.646725 |
| ANK1      | 8p11.21       | -0.03224 | 0.529911 | 0.646903 |
| KLK15     | 19q13.33      | -0.03223 | 0.529939 | 0.646903 |
| MICU1     | 10q22.1       | -0.03223 | 0.530032 | 0.646976 |
| ZXDB      | Xp11.21       | -0.03222 | 0.530111 | 0.647034 |
| HACD2     | 3q21.1        | -0.0322  | 0.530375 | 0.647317 |
| NEUROG3   | 10q22.1       | 0.032196 | 0.530421 | 0.647318 |
| APOA1     | 11q23.3       | -0.03219 | 0.53044  | 0.647318 |

|           |          |          |          |          |
|-----------|----------|----------|----------|----------|
| PRR26     | 10p15.3  | 0.032174 | 0.530697 | 0.647591 |
| WDR45B    | 17q25.3  | -0.03215 | 0.530978 | 0.647895 |
| LINC01590 | 6q15     | -0.03214 | 0.531171 | 0.648091 |
| TFDP2     | 3q23     | -0.03211 | 0.531517 | 0.648474 |
| RAB11FIP3 | 16p13.3  | 0.032093 | 0.531738 | 0.648703 |
| C12ORF56  | 12q14.2  | -0.03206 | 0.532102 | 0.649108 |
| ZNF446    | 19q13.43 | -0.03206 | 0.532165 | 0.649145 |
| UTP18     | 17q21.33 | -0.03205 | 0.532267 | 0.64923  |
| DENND1C   | 19p13.3  | 0.032049 | 0.5323   | 0.64923  |
| ZNF550    | 19q13.43 | -0.03204 | 0.532377 | 0.649285 |
| ALDH1L1   | 3q21.3   | 0.032029 | 0.53255  | 0.649421 |
| HLTF      | 3q24     | 0.032029 | 0.532553 | 0.649421 |
| NUDT6     | 4q28.1   | 0.03202  | 0.532666 | 0.649519 |
| RBM38     | 20q13.31 | -0.03201 | 0.532815 | 0.649659 |
| PAEP      | 9q34.3   | -0.032   | 0.532868 | 0.649659 |
| SBK2      | 19q13.42 | -0.032   | 0.532886 | 0.649659 |
| FZD9      | 7q11.23  | -0.032   | 0.53291  | 0.649659 |
| ASGR1     | 17p13.1  | -0.03199 | 0.53303  | 0.649765 |
| RTP5      | 2q37.3   | 0.031977 | 0.533227 | 0.649928 |
| TMPRSS11F | 4q13.2   | -0.03198 | 0.533228 | 0.649928 |
| APBA3     | 19p13.3  | -0.03197 | 0.533336 | 0.649997 |
| HLA-C     | 6p21.33  | -0.03197 | 0.53335  | 0.649997 |
| HSDL2     | 9q32     | 0.031963 | 0.533405 | 0.650015 |
| GBA       | 1q22     | -0.03196 | 0.53343  | 0.650015 |
| CHRFAM7A  | 15q13.2  | 0.031957 | 0.533479 | 0.650036 |
| PDYN      | 20p13    | -0.03195 | 0.533548 | 0.650081 |
| ZNF133    | 20p11.23 | -0.03195 | 0.533612 | 0.650092 |
| FXVD7     | 19q13.12 | -0.03195 | 0.533623 | 0.650092 |
| XIAP      | Xq25     | -0.03193 | 0.533772 | 0.650234 |
| VAPB      | 20q13.32 | -0.03193 | 0.533833 | 0.650269 |
| CSN1S1    | 4q13.3   | -0.03192 | 0.533962 | 0.650377 |
| TEX13B    | Xq22.3   | 0.031917 | 0.533987 | 0.650377 |
| SPA17     | 11q24.2  | 0.031893 | 0.534296 | 0.650715 |
| LINC00470 | 18p11.32 | -0.03188 | 0.534482 | 0.650902 |
| TNRC6C    | 17q25.3  | -0.03187 | 0.534617 | 0.651026 |
| UBQLNL    | 11p15.4  | -0.03183 | 0.535143 | 0.651626 |
| LLGL1     | 17p11.2  | -0.03182 | 0.535208 | 0.651666 |
| ACVR1C    | 2q24.1   | -0.03181 | 0.535401 | 0.651862 |
| PSMG3-AS1 | 7p22.3   | -0.0318  | 0.535445 | 0.651876 |
| HTR3D     | 3q27.1   | -0.0318  | 0.53549  | 0.651891 |
| IL37      | 2q14.1   | 0.031752 | 0.536102 | 0.652596 |
| TACSTD2   | 1p32.1   | -0.03174 | 0.53624  | 0.652725 |
| CCL3L3    | 17q12    | -0.0317  | 0.536801 | 0.653368 |
| ZNF705D   | 8p23.1   | 0.031695 | 0.536846 | 0.653383 |
| USP35     | 11q14.1  | 0.031688 | 0.536936 | 0.653453 |
| BDKRB2    | 14q32.2  | -0.03167 | 0.537146 | 0.653669 |
| NKX6-2    | 10q26.3  | -0.03166 | 0.537318 | 0.653838 |
| HSP90B3P  | 1p22.1   | -0.03165 | 0.537466 | 0.653979 |
| SGSH      | 17q25.3  | -0.03164 | 0.537612 | 0.654058 |
| ALG13     | Xq23     | -0.03163 | 0.537623 | 0.654058 |
| H2BFM     | Xq22.2   | -0.03163 | 0.537629 | 0.654058 |
| LINC00928 | 15q26.1  | -0.03163 | 0.537664 | 0.65406  |
| CRSP8P    | 5q14.1   | 0.031612 | 0.537908 | 0.654317 |
| RIBC1     | Xp11.22  | 0.031601 | 0.538049 | 0.654427 |
| MRTFB     | 16p13.12 | -0.0316  | 0.538066 | 0.654427 |
| RAD21L1   | 20p13    | 0.031597 | 0.538096 | 0.654427 |
| HMSD      | 18q22.1  | -0.03159 | 0.53816  | 0.654465 |
| AKR7A2    | 1p36.13  | 0.031563 | 0.538537 | 0.654884 |

|           |              |          |          |          |
|-----------|--------------|----------|----------|----------|
| HMG3      | 6q14.1       | -0.03155 | 0.538648 | 0.654979 |
| RASAL1    | 12q24.13     | 0.031534 | 0.538917 | 0.655266 |
| ASPH      | 8q12.3       | 0.031531 | 0.53895  | 0.655266 |
| HORMAD1   | 1q21.3       | 0.031527 | 0.539004 | 0.655292 |
| HLA-A     | 6p22.1       | -0.03151 | 0.539169 | 0.655453 |
| MORF4L2   | Xq22.2       | 0.031509 | 0.539238 | 0.655498 |
| SNX13     | 7p21.1       | -0.03149 | 0.539424 | 0.655684 |
| INSL4     | 9p24.1       | 0.031489 | 0.539488 | 0.655722 |
| POGLUT3   | 11q22.3      | -0.03148 | 0.53964  | 0.655867 |
| C1QTNF9   | 13q12.12     | -0.03147 | 0.539797 | 0.656018 |
| GSTK1     | 7q34         | -0.03146 | 0.539854 | 0.656047 |
| MPP7      | 10p12.1      | -0.03145 | 0.540023 | 0.656213 |
| LY6E      | 8q24.3       | 0.031433 | 0.540209 | 0.656399 |
| SLCO1B1   | 12p12.1      | 0.031426 | 0.540305 | 0.656476 |
| XKRX      | Xq22.1       | -0.03142 | 0.540354 | 0.656495 |
| TNFRSF10B | 8p21.3       | 0.031415 | 0.540451 | 0.656573 |
| EMSY      | 11q13.5      | 0.031403 | 0.540606 | 0.656722 |
| ABCC6     | 16p13.11     | 0.031387 | 0.540809 | 0.656929 |
| EIF2A     | 3q25.1       | -0.03138 | 0.54087  | 0.656963 |
| SLC5A2    | 16p11.2      | 0.031369 | 0.541038 | 0.657116 |
| GALP      | 19q13.43     | 0.031367 | 0.541062 | 0.657116 |
| MGC27382  | 1p31.1       | -0.03133 | 0.54158  | 0.657706 |
| SNORA69   | Xq24         | -0.03132 | 0.541624 | 0.657719 |
| SSX8P     | Xp11.22      | 0.031311 | 0.541787 | 0.657877 |
| NDUFAF7   | 2p22.2       | 0.031307 | 0.541834 | 0.657895 |
| ARL13B    | 3q11.1-q11.2 | -0.03129 | 0.542021 | 0.658081 |
| GPR17     | 2q14.3       | 0.03129  | 0.542058 | 0.658086 |
| C1QL4     | 12q13.12     | 0.031285 | 0.542124 | 0.658127 |
| TTC23L    | 5p13.2       | -0.03128 | 0.542184 | 0.65816  |
| BCORP1    | Yq11.222     | 0.031227 | 0.542879 | 0.658964 |
| SLC2A1    | 1p34.2       | -0.03122 | 0.542914 | 0.658966 |
| FAR2      | 12p11.22     | 0.03122  | 0.542964 | 0.658986 |
| MRPL28    | 16p13.3      | 0.031192 | 0.543323 | 0.659345 |
| ADAD1     | 4q27         | -0.03119 | 0.543335 | 0.659345 |
| ZNF460    | 19q13.43     | 0.03119  | 0.543358 | 0.659345 |
| PPP1R9B   | 17q21.33     | 0.031175 | 0.54354  | 0.659526 |
| PHF13     | 1p36.31      | 0.031161 | 0.543732 | 0.659654 |
| LHPP      | 10q26.13     | -0.03116 | 0.543735 | 0.659654 |
| IL17A     | 6p12.2       | 0.03116  | 0.543744 | 0.659654 |
| AZU1      | 19p13.3      | 0.031149 | 0.543886 | 0.659786 |
| OR1A2     | 17p13.3      | 0.031126 | 0.544185 | 0.660108 |
| HTR3B     | 11q23.2      | -0.03109 | 0.544587 | 0.660557 |
| CD55      | 1q32.2       | -0.03108 | 0.544727 | 0.660686 |
| CSMD1     | 8p23.2       | -0.03107 | 0.544848 | 0.660792 |
| GDF15     | 19p13.11     | -0.03107 | 0.544966 | 0.660867 |
| HLA-G     | 6p22.1       | -0.03106 | 0.544975 | 0.660867 |
| OR56A1    | 11p15.4      | 0.031047 | 0.545199 | 0.661049 |
| ZNF776    | 19q13.43     | -0.03105 | 0.545212 | 0.661049 |
| PLSCR5    | 3q24         | -0.03105 | 0.545224 | 0.661049 |
| CHAT      | 10q11.23     | -0.031   | 0.545779 | 0.661682 |
| TNIP3     | 4q27         | -0.031   | 0.545824 | 0.661696 |
| CXORF40A  | Xq28         | -0.03099 | 0.545881 | 0.661725 |
| LOC284798 | 20p11.21     | -0.03098 | 0.546047 | 0.661886 |
| ADAMTS14  | 10q22.1      | 0.030975 | 0.546135 | 0.661953 |
| CLDN15    | 7q22.1       | -0.03097 | 0.546247 | 0.662048 |
| CCDC196   | 14q23.3      | 0.030944 | 0.546536 | 0.662359 |
| MON2      | 12q14.1      | 0.030938 | 0.546621 | 0.662394 |
| C5ORF38   | 5p15.33      | 0.030935 | 0.546652 | 0.662394 |

|           |                |          |          |          |
|-----------|----------------|----------|----------|----------|
| MBD2      | 18q21.2        | 0.030932 | 0.546688 | 0.662394 |
| ALCAM     | 3q13.11        | -0.03093 | 0.546724 | 0.662394 |
| OR10V1    | 11q12.1        | -0.03093 | 0.54673  | 0.662394 |
| CFAP410   | 21q22.3        | 0.030911 | 0.546959 | 0.662631 |
| IFNA17    | 9p21.3         | -0.03089 | 0.547173 | 0.662792 |
| SNAR-C3   | 19q13.33       | 0.030895 | 0.547173 | 0.662792 |
| TBATA     | 10q22.1        | 0.030891 | 0.54722  | 0.662792 |
| TP53      | 17p13.1        | 0.030891 | 0.54723  | 0.662792 |
| PPP1R3D   | 20q13.33       | -0.03089 | 0.547258 | 0.662792 |
| SCO1      | 17p13.1        | 0.030874 | 0.547448 | 0.662982 |
| MAN2A1    | 5q21.3         | -0.03086 | 0.54761  | 0.663138 |
| C1ORF61   | 1q22           | -0.03085 | 0.547807 | 0.663295 |
| LOC154761 | 7q35           | -0.03084 | 0.547833 | 0.663295 |
| PMCH      | 12q23.2        | -0.03084 | 0.547839 | 0.663295 |
| STXBP1    | 9q34.11        | 0.030837 | 0.547926 | 0.663325 |
| C9ORF43   | 9q32           | -0.03084 | 0.54793  | 0.663325 |
| PPP4R3C   | Xp21.3         | 0.030833 | 0.547974 | 0.663338 |
| NME2P1    | 12q24.23       | -0.03082 | 0.548161 | 0.663524 |
| SLC45A4   | 8q24.3         | 0.030812 | 0.548247 | 0.663589 |
| TRPC2     | 11p15.4        | 0.030783 | 0.548629 | 0.663973 |
| KCNRG     | 13q14.2        | 0.030783 | 0.54863  | 0.663973 |
| INTS5     | 11q12.3        | 0.030771 | 0.548781 | 0.664115 |
| GNB1L     | 22q11.21       | 0.030761 | 0.54891  | 0.664218 |
| GLOD4     | 17p13.3        | -0.03076 | 0.548933 | 0.664218 |
| TSPAN1    | 1p34.1         | 0.030755 | 0.548986 | 0.664242 |
| CAPZA1    | 1p13.2         | -0.03075 | 0.549117 | 0.664361 |
| LRRFIP2   | 3p22.2         | 0.030739 | 0.549201 | 0.664423 |
| CCDC70    | 13q14.3        | -0.03073 | 0.549326 | 0.664534 |
| MPI       | 15q24.1        | -0.03073 | 0.549361 | 0.664535 |
| GDF1      | 19p13.11       | 0.030717 | 0.549484 | 0.664644 |
| EGFEM1P   | 3q26.2         | -0.03071 | 0.549574 | 0.664713 |
| LMF1      | 16p13.3        | -0.03069 | 0.549849 | 0.665005 |
| PSMD6     | 3p14.1         | 0.030687 | 0.549881 | 0.665005 |
| DKKL1     | 19q13.33       | -0.03068 | 0.549976 | 0.665079 |
| SEPTIN3   | 22q13.2        | -0.03066 | 0.550198 | 0.665307 |
| TOM1L2    | 17p11.2        | 0.030657 | 0.550265 | 0.665348 |
| BTBD19    | 1p34.1         | -0.03063 | 0.550587 | 0.665697 |
| TPK1      | 7q35           | -0.03061 | 0.550915 | 0.666054 |
| PSMA7     | 20q13.33       | -0.0306  | 0.551005 | 0.666095 |
| GEMIN8    | Xp22.2         | -0.0306  | 0.551016 | 0.666095 |
| FBXO40    | 3q13.33        | -0.03059 | 0.551108 | 0.666137 |
| AGPAT5    | 8p23.1         | 0.030592 | 0.551117 | 0.666137 |
| LAMC2     | 1q25.3         | -0.03057 | 0.551411 | 0.666452 |
| YY2       | Xp22.12        | 0.030566 | 0.551454 | 0.666454 |
| SNORA16B  | 1q32.3         | -0.03056 | 0.551479 | 0.666454 |
| CFAP20    | 16q21          | 0.030544 | 0.551742 | 0.666732 |
| LDLRAD1   | 1p32.3         | -0.03053 | 0.551885 | 0.666833 |
| KRT79     | 12q13.13       | -0.03053 | 0.551892 | 0.666833 |
| OPRPN     | 4q13.3         | -0.03051 | 0.552159 | 0.667115 |
| LYZL1     | 10p12.1-p11.23 | 0.030505 | 0.552245 | 0.667178 |
| SLC16A6   | 17q24.2        | 0.030498 | 0.552343 | 0.66724  |
| MCHR2     | 6q16.2         | 0.030495 | 0.552381 | 0.66724  |
| MPHOSPH8  | 13q12.11       | 0.030493 | 0.552396 | 0.66724  |
| PYDC1     | 16p11.2        | -0.03049 | 0.552478 | 0.667295 |
| FOXJ3     | 1p34.2         | -0.03048 | 0.552508 | 0.667295 |
| ADCK2     | 7q34           | -0.03048 | 0.552595 | 0.66736  |
| SIK3      | 11q23.3        | -0.03047 | 0.552668 | 0.667408 |
| LCE3D     | 1q21.3         | -0.03043 | 0.553213 | 0.667945 |

|           |          |          |          |          |
|-----------|----------|----------|----------|----------|
| RBMY3AP   | Yp11.2   | 0.03043  | 0.553218 | 0.667945 |
| BET1L     | 11p15.5  | -0.03043 | 0.553227 | 0.667945 |
| ASIP      | 20q11.22 | -0.03043 | 0.553247 | 0.667945 |
| DDX59     | 1q32.1   | -0.03042 | 0.553345 | 0.668024 |
| SLC39A10  | 2q32.3   | -0.03042 | 0.553407 | 0.66804  |
| ZNF585B   | 19q13.12 | -0.03041 | 0.553443 | 0.66804  |
| HIST2H2BF | 1q21.2   | 0.030412 | 0.553459 | 0.66804  |
| CCDC149   | 4p15.2   | -0.0304  | 0.553615 | 0.668188 |
| CLRN1     | 3q25.1   | -0.0304  | 0.553674 | 0.668219 |
| KIAA0087  | 7p15.2   | -0.03038 | 0.553828 | 0.668365 |
| MTF2      | 1p22.1   | -0.03037 | 0.553952 | 0.668454 |
| PYCARD    | 16p11.2  | 0.030373 | 0.553969 | 0.668454 |
| KRT84     | 12q13.13 | 0.030369 | 0.554017 | 0.668472 |
| JAKMIP3   | 10q26.3  | 0.030365 | 0.554076 | 0.668476 |
| TRERF1    | 6p21.1   | -0.03036 | 0.554087 | 0.668476 |
| HES5      | 1p36.32  | 0.03035  | 0.554268 | 0.668654 |
| MID1      | Xp22.2   | 0.030343 | 0.55436  | 0.668724 |
| CAPNS2    | 16q12.2  | 0.030334 | 0.554479 | 0.668823 |
| ESYT1     | 12q13.2  | 0.030332 | 0.554509 | 0.668823 |
| PNKD      | 2q35     | 0.030316 | 0.554708 | 0.669024 |
| OR11H4    | 14q11.2  | -0.0303  | 0.554975 | 0.669305 |
| SAMD9L    | 7q21.2   | -0.03029 | 0.555015 | 0.669313 |
| C10ORF131 | 10q24.1  | -0.03029 | 0.555084 | 0.669356 |
| MAGIX     | Xp11.23  | 0.030277 | 0.555215 | 0.669473 |
| TMEM200A  | 6q23.1   | -0.03027 | 0.555369 | 0.66962  |
| SNORA61   | 1p35.3   | 0.030258 | 0.555464 | 0.669659 |
| TYR       | 11q14.3  | 0.030258 | 0.55547  | 0.669659 |
| REXO1L1P  | 8q21.2   | -0.03026 | 0.555502 | 0.669659 |
| NDUFAF5   | 20p12.1  | -0.03024 | 0.555679 | 0.669798 |
| OARD1     | 6p21.1   | 0.030241 | 0.555686 | 0.669798 |
| OR5A1     | 11q12.1  | 0.030239 | 0.555718 | 0.669798 |
| TMEM141   | 9q34.3   | 0.030229 | 0.555848 | 0.669914 |
| PF4       | 4q13.3   | 0.030226 | 0.55589  | 0.669925 |
| HNRNPA0   | 5q31.2   | 0.030219 | 0.555975 | 0.669986 |
| CHID1     | 11p15.5  | -0.03019 | 0.556324 | 0.67036  |
| CD47      | 3q13.12  | -0.03019 | 0.556352 | 0.67036  |
| POU2AF1   | 11q23.1  | -0.03018 | 0.556459 | 0.670409 |
| PLPP6     | 9p24.1   | -0.03018 | 0.556467 | 0.670409 |
| HSD17B13  | 4q22.1   | 0.03018  | 0.556493 | 0.670409 |
| RANBP9    | 6p23     | -0.03018 | 0.556552 | 0.67044  |
| FETUB     | 3q27.3   | 0.030165 | 0.556692 | 0.670569 |
| MYH4      | 17p13.1  | 0.03016  | 0.556755 | 0.670604 |
| ZNF281    | 1q32.1   | -0.03012 | 0.557242 | 0.67115  |
| ST7-OT3   | 7q31.2   | -0.03011 | 0.557362 | 0.671255 |
| HILS1     | 17q21.33 | -0.03006 | 0.558116 | 0.672123 |
| HEMGN     | 9q22.33  | 0.030053 | 0.558154 | 0.672127 |
| COPS9     | 2q37.3   | -0.03005 | 0.558195 | 0.672137 |
| PATL2     | 15q21.1  | 0.030025 | 0.558517 | 0.672483 |
| OR2G2     | 1q44     | -0.03001 | 0.558722 | 0.672685 |
| PSEN2     | 1q42.13  | 0.030007 | 0.558751 | 0.672685 |
| THG1L     | 5q33.3   | 0.029983 | 0.55907  | 0.673028 |
| PSMB1     | 6q27     | 0.02997  | 0.559245 | 0.673198 |
| HTN1      | 4q13.3   | -0.02996 | 0.559323 | 0.673252 |
| PLAUR     | 19q13.31 | -0.02995 | 0.559536 | 0.673468 |
| RXFP3     | 5p13.2   | -0.02994 | 0.559613 | 0.67352  |
| SLC30A10  | 1q41     | -0.02992 | 0.559862 | 0.673773 |
| OR4E2     | 14q11.2  | 0.02992  | 0.559893 | 0.673773 |
| TMEM151A  | 11q13.2  | 0.029918 | 0.559925 | 0.673773 |

|              |                   |          |          |          |
|--------------|-------------------|----------|----------|----------|
| EVA1C        | 21q22.11          | -0.02989 | 0.560231 | 0.674065 |
| CSF2         | 5q31.1            | 0.029894 | 0.560234 | 0.674065 |
| MBD3L2       | 19p13.2           | 0.029883 | 0.560389 | 0.67421  |
| SLC52A2      | 8q24.3            | 0.029877 | 0.560466 | 0.674262 |
| TMEM154      | 4q31.3            | -0.02987 | 0.560511 | 0.674276 |
| PKN1         | 19p13.12          | 0.029857 | 0.560717 | 0.674484 |
| C22ORF42     | 22q12.3           | 0.029854 | 0.560762 | 0.674498 |
| ADK          | 10q22.2 10q11-q24 | 0.029842 | 0.560919 | 0.674646 |
| GRHL2        | 8q22.3            | 0.029806 | 0.561399 | 0.675182 |
| TEX261       | 2p13.3            | -0.0298  | 0.561486 | 0.675247 |
| EML5         | 14q31.3           | -0.02979 | 0.561554 | 0.675268 |
| VPS35        | 16q11.2           | -0.02979 | 0.561571 | 0.675268 |
| CLCC1        | 1p13.3            | -0.02979 | 0.561648 | 0.675319 |
| RGS10        | 10q26.11          | -0.02978 | 0.561701 | 0.675343 |
| CDC27        | 17q21.32          | -0.02978 | 0.561772 | 0.675388 |
| ADPRHL2      | 1p34.3            | 0.029771 | 0.56186  | 0.67545  |
| PTGER1       | 19p13.12          | -0.02977 | 0.561891 | 0.67545  |
| RPL21P44     | 4q12              | -0.02976 | 0.562041 | 0.675589 |
| GML          | 8q24.3            | -0.02975 | 0.562172 | 0.675707 |
| BORCS8-MEF2B | 19p13.11          | -0.02974 | 0.562308 | 0.67583  |
| DMAP1        | 1p34.1            | 0.02972  | 0.562525 | 0.676049 |
| PIGZ         | 3q29              | 0.029699 | 0.562805 | 0.676292 |
| MTFR1        | 8q13.1            | -0.0297  | 0.562822 | 0.676292 |
| SLC11A2      | 12q13.12          | -0.0297  | 0.562828 | 0.676292 |
| SLC25A3P1    | 1p32.3            | 0.029691 | 0.562909 | 0.676348 |
| PTF1A        | 10p12.2           | -0.02969 | 0.562974 | 0.676387 |
| CABP4        | 11q13.2           | 0.029682 | 0.563027 | 0.676409 |
| STRADB       | 2q33.1            | 0.029679 | 0.56306  | 0.676409 |
| CDCP2        | 1p32.3            | 0.029676 | 0.563104 | 0.676421 |
| GPS1         | 17q25.3           | -0.02965 | 0.563468 | 0.676818 |
| PACSIN3      | 11p11.2           | 0.029638 | 0.563604 | 0.676931 |
| TSGA13       | 7q32.2            | 0.029636 | 0.56363  | 0.676931 |
| HIBCH        | 2q32.2            | -0.02962 | 0.563831 | 0.677131 |
| RABGAP1L     | 1q25.1            | -0.02962 | 0.563868 | 0.677135 |
| BATF2        | 11q13.1           | -0.02961 | 0.56401  | 0.677265 |
| FOXJ2        | 12p13.31          | 0.0296   | 0.564109 | 0.677343 |
| RABL2A       | 2q14.1            | 0.029583 | 0.564324 | 0.677521 |
| BPIFB2       | 20q11.21          | -0.02958 | 0.564349 | 0.677521 |
| ABCC1        | 16p13.11          | -0.02958 | 0.564358 | 0.677521 |
| NCEH1        | 3q26.31           | -0.02958 | 0.564412 | 0.67754  |
| CRCT1        | 1q21.3            | -0.02957 | 0.564442 | 0.67754  |
| SLC44A5      | 1p31.1            | -0.02953 | 0.565046 | 0.678224 |
| CGB8         | 19q13.33          | -0.02952 | 0.565119 | 0.678264 |
| CD2AP        | 6p12.3            | 0.029521 | 0.565147 | 0.678264 |
| MYO10        | 5p15.1            | 0.029515 | 0.565218 | 0.678309 |
| ZNF576       | 19q13.31          | -0.02947 | 0.565771 | 0.678912 |
| SPNS2        | 17p13.2           | -0.02947 | 0.565789 | 0.678912 |
| H3F3AP5      | Xp11.22           | -0.02943 | 0.566366 | 0.679564 |
| L1TD1        | 1p31.3            | -0.02942 | 0.566433 | 0.679604 |
| ECT2L        | 6q24.1            | -0.02942 | 0.566517 | 0.679609 |
| NIN          | 14q22.1           | -0.02942 | 0.566538 | 0.679609 |
| SLC22A8      | 11q12.3           | 0.029412 | 0.566588 | 0.679609 |
| OR2AT4       | 11q13.4           | -0.02941 | 0.566619 | 0.679609 |
| MAPK6        | 15q21.2           | -0.02941 | 0.566641 | 0.679609 |
| IRF2BP2      | 1q42.3            | 0.029403 | 0.566703 | 0.679609 |
| CD300LD      | 17q25.1           | -0.0294  | 0.566704 | 0.679609 |
| ISG20        | 15q26.1           | -0.0294  | 0.566715 | 0.679609 |
| UGT2B28      | 4q13.2            | -0.0294  | 0.566742 | 0.679609 |

|           |          |          |          |          |
|-----------|----------|----------|----------|----------|
| MTG2      | 20q13.33 | 0.029384 | 0.566948 | 0.679814 |
| TIMM9     | 14q23.1  | -0.02938 | 0.56703  | 0.679872 |
| CCDC27    | 1p36.32  | -0.02937 | 0.567078 | 0.679889 |
| REG3G     | 2p12     | -0.02935 | 0.567399 | 0.680233 |
| LRRC24    | 8q24.3   | 0.029341 | 0.567521 | 0.680337 |
| RNASEL    | 1q25.3   | -0.02934 | 0.567553 | 0.680337 |
| POLR2A    | 17p13.1  | 0.029325 | 0.567732 | 0.680511 |
| RNF216P1  | 7p22.1   | -0.0293  | 0.568025 | 0.680821 |
| RNH1      | 11p15.5  | -0.0293  | 0.568096 | 0.680866 |
| KRTAP9-2  | 17q21.2  | 0.029292 | 0.568167 | 0.68091  |
| HPS4      | 22q12.1  | -0.02928 | 0.568338 | 0.681074 |
| MCCD1     | 6p21.33  | 0.029275 | 0.568391 | 0.681096 |
| KLF6      | 10p15.2  | -0.02927 | 0.568483 | 0.681163 |
| TOP1      | 20q12    | 0.029266 | 0.568515 | 0.681163 |
| CD27-AS1  | 12p13.31 | -0.02925 | 0.568685 | 0.681327 |
| GSKIP     | 14q32.2  | -0.02925 | 0.568768 | 0.681385 |
| CDH1      | 16q22.1  | -0.02924 | 0.568836 | 0.681426 |
| SPHAR     | 1q42.13  | -0.02923 | 0.569007 | 0.681549 |
| FOCAD     | 9p21.3   | -0.02923 | 0.569007 | 0.681549 |
| SDR42E1   | 16q23.3  | -0.02922 | 0.569127 | 0.681581 |
| RASA4     | 7q22.1   | -0.02922 | 0.569184 | 0.681581 |
| NCOR2     | 12q24.31 | 0.029215 | 0.569184 | 0.681581 |
| BMP10     | 2p13.3   | -0.02921 | 0.569195 | 0.681581 |
| SCRT1     | 8q24.3   | 0.029212 | 0.569227 | 0.681581 |
| SNHG8     | 4q26     | -0.02921 | 0.569238 | 0.681581 |
| FOXG1     | 14q12    | 0.029208 | 0.569281 | 0.681592 |
| CORO1A    | 16p11.2  | -0.0292  | 0.569437 | 0.681729 |
| CYP2E1    | 10q26.3  | 0.029194 | 0.569464 | 0.681729 |
| ACOX2     | 3p14.3   | -0.02919 | 0.56952  | 0.681742 |
| SPATA16   | 3q26.31  | 0.029186 | 0.569564 | 0.681742 |
| FAM186B   | 12q13.12 | -0.02919 | 0.569576 | 0.681742 |
| ABCC8     | 11p15.1  | -0.02918 | 0.569684 | 0.68183  |
| DEFA1B    | 8p23.1   | -0.02917 | 0.569782 | 0.681907 |
| LEAP2     | 5q31.1   | 0.02916  | 0.569914 | 0.682024 |
| GAB4      | 22q11.1  | -0.02915 | 0.570021 | 0.682111 |
| ITGB1BP1  | 2p25.1   | -0.02915 | 0.570064 | 0.682121 |
| PELI1     | 2p14     | -0.02913 | 0.5703   | 0.682364 |
| EIF3I     | 1p35.2   | 0.029124 | 0.570394 | 0.682435 |
| OAZ1      | 19p13.3  | 0.029121 | 0.570431 | 0.682439 |
| PGLYRP4   | 1q21.3   | 0.029115 | 0.570502 | 0.682483 |
| GJB4      | 1p34.3   | -0.0291  | 0.570762 | 0.682753 |
| SLC38A10  | 17q25.3  | 0.029084 | 0.570919 | 0.6829   |
| NAT8      | 2p13.1   | 0.029072 | 0.571082 | 0.683054 |
| GAGE1     | Xp11.23  | -0.02907 | 0.571118 | 0.683056 |
| BPIFA4P   | 20q11.21 | -0.02904 | 0.571547 | 0.683528 |
| TTC3      | 21q22.13 | -0.02903 | 0.571638 | 0.683596 |
| ARSG      | 17q24.2  | -0.02903 | 0.571672 | 0.683596 |
| ABCE1     | 4q31.21  | 0.029016 | 0.571815 | 0.683726 |
| ST3GAL4   | 11q24.2  | -0.02901 | 0.57196  | 0.683859 |
| NDUFB10   | 16p13.3  | 0.028999 | 0.572043 | 0.683918 |
| EEF1AKMT1 | 13q12.11 | -0.02899 | 0.572109 | 0.683955 |
| PRPF18    | 10p13    | 0.02899  | 0.57216  | 0.683976 |
| LINC00937 | 12p13.31 | 0.028978 | 0.572318 | 0.684124 |
| HIGD2A    | 5q35.2   | -0.02897 | 0.572483 | 0.68428  |
| DPY19L3   | 19q13.11 | 0.028962 | 0.572542 | 0.684297 |
| RDH16     | 12q13.3  | 0.02896  | 0.572565 | 0.684297 |
| HBEGF     | 5q31.3   | -0.02893 | 0.572897 | 0.684652 |
| MIR7-3HG  | 19p13.3  | -0.02893 | 0.572969 | 0.684698 |



|              |               |          |          |          |
|--------------|---------------|----------|----------|----------|
| EEF1D        | 8q24.3        | -0.02892 | 0.573094 | 0.684806 |
| PAX8         | 2q14.1        | -0.02891 | 0.573281 | 0.684956 |
| MAFF         | 22q13.1       | -0.0289  | 0.573302 | 0.684956 |
| CIDEB        | 14q12         | -0.0289  | 0.573322 | 0.684956 |
| ZNF197       | 3p21.31       | -0.02889 | 0.573437 | 0.685052 |
| DIAPH2       | Xq21.33       | 0.028889 | 0.573499 | 0.685063 |
| PPP2R1B      | 11q23.1       | -0.02889 | 0.573514 | 0.685063 |
| LINC00575    | 4q21.22       | -0.02887 | 0.573691 | 0.685234 |
| LOC642929    | 9q21.11       | 0.028869 | 0.573775 | 0.685293 |
| GPSM2        | 1p13.3        | -0.02886 | 0.573908 | 0.685411 |
| ZNF516       | 18q23         | -0.02885 | 0.573957 | 0.685428 |
| INTS4        | 11q14.1       | -0.02885 | 0.574074 | 0.685527 |
| PROX2        | 14q24.3       | 0.028843 | 0.574117 | 0.685538 |
| GLMN         | 1p22.1        | -0.02884 | 0.574214 | 0.685613 |
| AGAP2        | 12q14.1       | 0.02883  | 0.574288 | 0.685651 |
| DLD          | 7q31.1        | -0.02883 | 0.574314 | 0.685651 |
| CEACAM3      | 19q13.2       | 0.028818 | 0.574451 | 0.685773 |
| OR51F2       | 11p15.4       | 0.028799 | 0.574702 | 0.686032 |
| EXOSC5       | 19q13.2       | 0.028795 | 0.574752 | 0.686037 |
| TMEM9        | 1q32.1        | -0.02879 | 0.574806 | 0.686037 |
| SENP6        | 6q14.1        | 0.028791 | 0.574809 | 0.686037 |
| MCL1         | 1q21.2        | 0.028776 | 0.575009 | 0.686235 |
| ELAC2        | 17p12         | 0.028762 | 0.575192 | 0.686413 |
| CLCA1        | 1p22.3        | -0.02875 | 0.575332 | 0.686539 |
| OR2F2        | 7q35          | -0.02871 | 0.57588  | 0.687132 |
| MEFV         | 16p13.3       | 0.028709 | 0.575898 | 0.687132 |
| ZNF226       | 19q13.31      | 0.028695 | 0.57608  | 0.687308 |
| CYP2R1       | 11p15.2       | -0.02869 | 0.576124 | 0.68732  |
| RHPN2        | 19q13.11      | -0.02867 | 0.57638  | 0.687585 |
| ACO1         | 9p21.1        | 0.02867  | 0.576415 | 0.687585 |
| GRB14        | 2q24.3        | -0.02866 | 0.576522 | 0.687633 |
| EFHD2        | 1p36.21       | 0.028662 | 0.576524 | 0.687633 |
| C3ORF62      | 3p21.31       | 0.028657 | 0.576584 | 0.687663 |
| PRR30        | 2p23.3        | 0.028655 | 0.576621 | 0.687667 |
| ACADL        | 2q34          | -0.02865 | 0.576665 | 0.687678 |
| KALRN        | 3q21.1-q21.2  | 0.028638 | 0.576836 | 0.687841 |
| FAM170A      | 5q23.1        | -0.02863 | 0.576971 | 0.687961 |
| LINGO3       | 19p13.3       | -0.02861 | 0.577164 | 0.688151 |
| HIST1H1C     | 6p22.2        | -0.02861 | 0.577209 | 0.688163 |
| SLC2A4       | 17p13.1       | 0.028599 | 0.577366 | 0.68828  |
| SLC6A18      | 5p15.33       | -0.02859 | 0.577431 | 0.68828  |
| MRPL30       | 2q11.2        | -0.02859 | 0.577518 | 0.68828  |
| LINC00029    | 20q13.33      | -0.02859 | 0.577519 | 0.68828  |
| TNFRSF6B     | 20q13.33      | 0.028587 | 0.577524 | 0.68828  |
| THEG         | 19p13.3       | 0.028579 | 0.577625 | 0.68828  |
| NF1P2        | 15q11.2       | -0.02857 | 0.577719 | 0.68828  |
| LOC100287704 | 7q11.21       | -0.02857 | 0.577719 | 0.68828  |
| OR52E6       | 11p15.4       | -0.02857 | 0.577719 | 0.68828  |
| OR51B6       | 11p15.4       | -0.02857 | 0.577719 | 0.68828  |
| POM121L12    | 7p12.1        | -0.02857 | 0.577719 | 0.68828  |
| TNP1         | 2q35          | -0.02857 | 0.577719 | 0.68828  |
| NUDT22       | 11q13.1       | 0.028569 | 0.577765 | 0.688293 |
| CRISP2       | 6p12.3        | -0.02855 | 0.578012 | 0.688546 |
| SYTL5        | Xp11.4        | 0.028542 | 0.578116 | 0.68863  |
| FCRL4        | 1q23.1        | -0.02853 | 0.578303 | 0.688812 |
| MYH9         | 22q12.3       | -0.02851 | 0.578525 | 0.689035 |
| MIA          | 19q13.2       | 0.028502 | 0.578653 | 0.689141 |
| NUMB         | 14q24.2-q24.3 | -0.0285  | 0.578683 | 0.689141 |

|            |          |          |          |          |
|------------|----------|----------|----------|----------|
| FUOM       | 10q26.3  | 0.028494 | 0.578766 | 0.689199 |
| NDUFB2-AS1 | 7q34     | 0.028474 | 0.57903  | 0.689441 |
| NAF1       | 4q32.2   | 0.028473 | 0.579039 | 0.689441 |
| MRPL48     | 11q13.4  | -0.02847 | 0.57911  | 0.689458 |
| PANX3      | 11q24.2  | 0.028467 | 0.579122 | 0.689458 |
| PCDHB1     | 5q31.3   | -0.02845 | 0.579328 | 0.689663 |
| POU1F1     | 3p11.2   | -0.02845 | 0.579412 | 0.689695 |
| AGMAT      | 1p36.21  | 0.028444 | 0.579423 | 0.689695 |
| SNORA49    | 12q24.33 | -0.02844 | 0.57954  | 0.689793 |
| DLX4       | 17q21.33 | -0.02843 | 0.57965  | 0.689882 |
| PON3       | 7q21.3   | 0.028425 | 0.579684 | 0.689882 |
| TXNDC16    | 14q22.1  | 0.028412 | 0.579857 | 0.690047 |
| PNMA2      | 8p21.2   | -0.0284  | 0.580038 | 0.690221 |
| C12ORF29   | 12q21.32 | -0.02839 | 0.580093 | 0.690245 |
| CLPTM1L    | 5p15.33  | 0.028379 | 0.580297 | 0.690447 |
| FOXL2      | 3q22.3   | -0.02837 | 0.580472 | 0.690615 |
| SLC10A7    | 4q31.22  | -0.02836 | 0.580518 | 0.690628 |
| ADM2       | 22q13.33 | 0.02835  | 0.580676 | 0.690775 |
| THAP3      | 1p36.31  | 0.028332 | 0.580926 | 0.691031 |
| LOC285593  | 5q35.2   | 0.028315 | 0.581152 | 0.691259 |
| LCE2C      | 1q21.3   | 0.028296 | 0.581409 | 0.691523 |
| ASTE1      | 3q22.1   | -0.02829 | 0.581472 | 0.691558 |
| C12ORF73   | 12q23.3  | 0.028272 | 0.581728 | 0.691821 |
| NUMA1      | 11q13.4  | 0.028257 | 0.581921 | 0.69201  |
| COG3       | 13q14.13 | 0.028246 | 0.582074 | 0.69215  |
| EAF1       | 3p25.1   | 0.028224 | 0.582359 | 0.692448 |
| SLC4A1     | 17q21.31 | 0.028218 | 0.58245  | 0.692515 |
| TMEM41B    | 11p15.4  | 0.028214 | 0.582494 | 0.692526 |
| PRKACA     | 19p13.12 | -0.02821 | 0.582551 | 0.692554 |
| OR4N4      | 15q11.2  | 0.028205 | 0.582624 | 0.692587 |
| MFSD6L     | 17p13.1  | -0.0282  | 0.582656 | 0.692587 |
| STARD7-AS1 | 2q11.2   | 0.028198 | 0.582707 | 0.692587 |
| OR56A4     | 11p15.4  | -0.0282  | 0.582718 | 0.692587 |
| MITD1      | 2q11.2   | -0.02819 | 0.582764 | 0.692601 |
| DEFB126    | 20p13    | 0.028191 | 0.582805 | 0.692608 |
| HES2       | 1p36.31  | -0.02817 | 0.58311  | 0.69293  |
| RHOF       | 12q24.31 | 0.028151 | 0.583346 | 0.693142 |
| ZNF264     | 19q13.43 | -0.02815 | 0.583358 | 0.693142 |
| OR2T1      | 1q44     | -0.02811 | 0.583923 | 0.693773 |
| CTAG2      | Xq28     | -0.02805 | 0.584641 | 0.694525 |
| HDDC3      | 15q26.1  | 0.028053 | 0.584655 | 0.694525 |
| FHAD1      | 1p36.21  | 0.028052 | 0.58466  | 0.694525 |
| HNRNPH3    | 10q21.3  | 0.02803  | 0.58496  | 0.69484  |
| TRIM35     | 8p21.2   | -0.02799 | 0.58543  | 0.695319 |
| CDC26      | 9q32     | -0.02799 | 0.585433 | 0.695319 |
| GDI2       | 10p15.1  | 0.027982 | 0.585609 | 0.695487 |
| CCDC73     | 11p13    | -0.02797 | 0.58578  | 0.695648 |
| NPVF       | 7p15.3   | 0.027963 | 0.585862 | 0.695705 |
| LHFPL5     | 6p21.31  | -0.02795 | 0.586045 | 0.695881 |
| TNKS       | 8p23.1   | -0.02794 | 0.586126 | 0.695936 |
| FOXI1      | 5q35.1   | -0.02792 | 0.586397 | 0.696216 |
| CA8        | 8q12.1   | 0.027912 | 0.586536 | 0.69634  |
| SCYL1      | 11q13.1  | -0.02789 | 0.586825 | 0.696641 |
| FAM180B    | 11p11.2  | 0.027887 | 0.586883 | 0.696669 |
| OR2T35     | 1q44     | 0.02788  | 0.586977 | 0.696739 |
| NTPCR      | 1q42.2   | 0.027841 | 0.587498 | 0.697317 |
| OR2T4      | 1q44     | -0.02783 | 0.587648 | 0.697416 |
| NKAIN3     | 8q12.3   | -0.02783 | 0.587651 | 0.697416 |

|          |                |          |          |          |
|----------|----------------|----------|----------|----------|
| SUMO3    | 21q22.3        | -0.02782 | 0.587764 | 0.697508 |
| CORO1C   | 12q24.11       | -0.02781 | 0.587946 | 0.697654 |
| ACSBG1   | 15q25.1        | -0.02781 | 0.587956 | 0.697654 |
| ANXA2P2  | 9p13.3         | -0.02779 | 0.588183 | 0.697851 |
| YEATS4   | 12q15          | -0.02779 | 0.588192 | 0.697851 |
| DHRS7C   | 17p13.1        | -0.02778 | 0.588378 | 0.698013 |
| LGALS7B  | 19q13.2        | 0.027774 | 0.588398 | 0.698013 |
| WDR26    | 1q42.11-q42.12 | 0.027769 | 0.588461 | 0.698046 |
| TXNL4A   | 18q23          | 0.027754 | 0.588657 | 0.698237 |
| TRMT6    | 20p12.3        | -0.02775 | 0.588692 | 0.698237 |
| CLRN3    | 10q26.2        | 0.02774  | 0.588857 | 0.698392 |
| CMIP     | 16q23.2-q23.3  | 0.027732 | 0.588955 | 0.698442 |
| GABPB1   | 15q21.2        | -0.02773 | 0.588984 | 0.698442 |
| TDGF1P3  | Xq23           | -0.02773 | 0.589016 | 0.698442 |
| CCDC177  | 14q24.1        | -0.02773 | 0.589039 | 0.698442 |
| SLC6A11  | 3p25.3         | -0.0277  | 0.589424 | 0.698857 |
| GLRX     | 5q15           | -0.02769 | 0.589511 | 0.698884 |
| ERCC3    | 2q14.3         | -0.02769 | 0.589517 | 0.698884 |
| BCL10    | 1p22.3         | 0.027683 | 0.589618 | 0.698925 |
| MECOM    | 3q26.2         | 0.027683 | 0.589621 | 0.698925 |
| ST3GAL2  | 16q22.1        | -0.02767 | 0.589832 | 0.699096 |
| KBTBD8   | 3p14.1         | -0.02767 | 0.589835 | 0.699096 |
| ERI3     | 1p34.1         | -0.02765 | 0.590003 | 0.699254 |
| OR51L1   | 11p15.4        | 0.027643 | 0.590158 | 0.699396 |
| ABHD10   | 3q13.2         | -0.02764 | 0.590226 | 0.699435 |
| C16ORF58 | 16p11.2        | 0.027631 | 0.590313 | 0.699438 |
| MAGEB6   | Xp21.3         | -0.02763 | 0.590335 | 0.699438 |
| FEM1C    | 5q22.3         | -0.02763 | 0.590388 | 0.699438 |
| FAM41C   | 1p36.33        | 0.027625 | 0.590403 | 0.699438 |
| ARMT1    | 6q25.1         | -0.02762 | 0.590403 | 0.699438 |
| TMEM88B  | 1p36.33        | 0.027604 | 0.590679 | 0.699719 |
| MCF2L    | 13q34          | -0.0276  | 0.59071  | 0.699719 |
| MINDY1   | 1q21.3         | -0.0276  | 0.590758 | 0.699734 |
| ZNF157   | Xp11.3         | -0.02759 | 0.590908 | 0.699871 |
| MED9     | 17p11.2        | -0.02758 | 0.590962 | 0.699873 |
| GFM2     | 5q13.3         | -0.02758 | 0.590979 | 0.699873 |
| PIP5K1P1 | 6p24.3         | -0.02753 | 0.591742 | 0.700734 |
| A2ML1    | 12p13.31       | -0.02751 | 0.591986 | 0.700982 |
| DNM1P46  | 15q26.3        | -0.02749 | 0.592153 | 0.701138 |
| ZNF639   | 3q26.33        | -0.02748 | 0.592325 | 0.7013   |
| USP17L6P | 4p16.1         | 0.027479 | 0.592367 | 0.701309 |
| C16ORF82 | 16p12.1        | -0.02748 | 0.592411 | 0.701319 |
| DHX57    | 2p22.1         | -0.02746 | 0.59265  | 0.701541 |
| RBMXL2   | 11p15.4        | 0.027456 | 0.592669 | 0.701541 |
| CLDN9    | 16p13.3        | -0.02742 | 0.593097 | 0.702006 |
| ROS1     | 6q22.1         | 0.027416 | 0.593214 | 0.702104 |
| C5ORF56  | 5q31.1         | 0.027411 | 0.593277 | 0.702136 |
| AGO3     | 1p34.3         | 0.027406 | 0.593343 | 0.702149 |
| SYNE2    | 14q23.2        | 0.027405 | 0.593358 | 0.702149 |
| FAM102B  | 1p13.3         | 0.027395 | 0.593491 | 0.702224 |
| CYB561D1 | 1p13.3         | 0.027394 | 0.593506 | 0.702224 |
| GPCPD1   | 20p12.3        | -0.02739 | 0.593526 | 0.702224 |
| SLC2A8   | 9q33.3         | 0.027384 | 0.593648 | 0.702327 |
| HYAL1    | 3p21.31        | 0.027372 | 0.593811 | 0.702478 |
| ZNF90    | 19p12          | 0.027362 | 0.593941 | 0.702591 |
| TGM3     | 20p13          | -0.02736 | 0.593998 | 0.702601 |
| EGR4     | 2p13.2         | -0.02736 | 0.59402  | 0.702601 |
| C11ORF21 | 11p15.5        | -0.02734 | 0.594284 | 0.702871 |

|             |            |          |          |          |
|-------------|------------|----------|----------|----------|
| LINC00923   | 15q26.2    | 0.027333 | 0.594337 | 0.702893 |
| NPNT        | 4q24       | 0.027305 | 0.594717 | 0.703263 |
| TIGD2       | 4q22.1     | 0.027304 | 0.59472  | 0.703263 |
| PCBP2       | 12q13.13   | 0.027294 | 0.594865 | 0.703386 |
| RIPK1       | 6p25.2     | 0.027291 | 0.594894 | 0.703386 |
| RBM3        | Xp11.23    | -0.02729 | 0.594941 | 0.703399 |
| APCS        | 1q23.2     | -0.02727 | 0.595223 | 0.703692 |
| CHKA        | 11q13.2    | 0.027256 | 0.595377 | 0.703776 |
| HYOU1       | 11q23.3    | 0.027255 | 0.595386 | 0.703776 |
| PSENN       | 19q13.12   | -0.02725 | 0.5954   | 0.703776 |
| NKX2-8      | 14q13.3    | -0.02725 | 0.595448 | 0.703791 |
| NPC1        | 18q11.2    | -0.02724 | 0.595624 | 0.703958 |
| SNORA38B    | 17q24.2    | 0.027234 | 0.595668 | 0.703968 |
| NPL         | 1q25.3     | -0.02723 | 0.595773 | 0.70405  |
| CCDC186     | 10q25.3    | -0.02722 | 0.595898 | 0.704156 |
| SSR2        | 1q22       | -0.02721 | 0.595994 | 0.704228 |
| C17ORF82    | 17q23.2    | -0.02721 | 0.596043 | 0.704245 |
| PSMD14      | 2q24.2     | 0.027179 | 0.596415 | 0.704643 |
| ADGRF4      | 6p12.3     | -0.02717 | 0.596485 | 0.704643 |
| PTCH1       | 9q22.32    | -0.02717 | 0.596485 | 0.704643 |
| ZIC3        | Xq26.3     | -0.02716 | 0.596646 | 0.704785 |
| FAM181A-AS1 | 14q32.12   | -0.02716 | 0.596676 | 0.704785 |
| NUFIP1      | 13q14.12   | -0.02715 | 0.596817 | 0.704847 |
| HIST1H2BD   | 6p22.2     | -0.02715 | 0.596829 | 0.704847 |
| CT45A2      | Xq26.3     | -0.02715 | 0.596853 | 0.704847 |
| DSPP        | 4q22.1     | 0.027145 | 0.596869 | 0.704847 |
| HSD17B3     | 9q22.32    | -0.02714 | 0.596966 | 0.704873 |
| STEAP3      | 2q14.2     | 0.027136 | 0.596992 | 0.704873 |
| ANKRD30A    | 10p11.21   | 0.027132 | 0.597044 | 0.704873 |
| LOC145474   | 14q24.2    | -0.02713 | 0.597047 | 0.704873 |
| GET4        | 7p22.3     | -0.02713 | 0.597067 | 0.704873 |
| SH3RF1      | 4q32.3-q33 | 0.027122 | 0.597178 | 0.704962 |
| NLRP10      | 11p15.4    | -0.02711 | 0.597406 | 0.705189 |
| MGMT        | 10q26.3    | -0.0271  | 0.597452 | 0.705202 |
| SLC22A10    | 11q12.3    | -0.0271  | 0.597545 | 0.705271 |
| IRS1        | 2q36.3     | -0.02709 | 0.597662 | 0.705367 |
| ACSM6       | 10q23.33   | 0.027056 | 0.598083 | 0.705823 |
| GGTLC1      | 20p11.21   | -0.02704 | 0.598257 | 0.705986 |
| FUT5        | 19p13.3    | 0.027038 | 0.598322 | 0.706022 |
| LINC02145   | 5p15.31    | -0.02702 | 0.598577 | 0.70628  |
| VPS26B      | 11q25      | 0.027013 | 0.598658 | 0.706335 |
| RPLP0       | 12q24.23   | -0.027   | 0.598824 | 0.706409 |
| LINC00160   | 21q22.12   | 0.027    | 0.598839 | 0.706409 |
| GPR55       | 2q37.1     | -0.027   | 0.598853 | 0.706409 |
| LZTS2       | 10q24.31   | -0.027   | 0.598862 | 0.706409 |
| CDKAL1      | 6p22.3     | -0.02699 | 0.599002 | 0.706532 |
| RAD51B      | 14q24.1    | -0.02698 | 0.599081 | 0.706584 |
| ITLN2       | 1q23.3     | 0.026979 | 0.599126 | 0.706595 |
| PAQR8       | 6p12.2     | 0.026959 | 0.599396 | 0.706872 |
| PITPNB      | 22q12.1    | 0.026949 | 0.599521 | 0.706978 |
| RNF135      | 17q11.2    | -0.02694 | 0.59962  | 0.707053 |
| GPR25       | 1q32.1     | 0.026928 | 0.599817 | 0.707203 |
| SPAM1       | 7q31.32    | 0.026927 | 0.599818 | 0.707203 |
| PPP1R15A    | 19q13.33   | 0.026885 | 0.600391 | 0.707823 |
| TP53TG5     | 20q13.12   | -0.02688 | 0.600414 | 0.707823 |
| DUSP15      | 20q11.21   | 0.026873 | 0.600557 | 0.70795  |
| HOXC12      | 12q13.13   | 0.026854 | 0.600814 | 0.708211 |
| WDFY2       | 13q14.3    | 0.026845 | 0.600942 | 0.70832  |

|           |          |          |          |          |
|-----------|----------|----------|----------|----------|
| MYBPH     | 1q32.1   | -0.02683 | 0.601148 | 0.708521 |
| MYH15     | 3q13.13  | 0.026813 | 0.601366 | 0.708736 |
| CCDC144NL | 17p11.2  | -0.02681 | 0.601458 | 0.708803 |
| LENG1     | 19q13.42 | -0.02679 | 0.601646 | 0.708983 |
| STXBP5L   | 3q13.33  | -0.02679 | 0.601731 | 0.709041 |
| KARS      | 16q23.1  | 0.02678  | 0.601819 | 0.709075 |
| EFR3B     | 2p23.3   | -0.02678 | 0.60183  | 0.709075 |
| SERPINA12 | 14q32.13 | -0.02677 | 0.601971 | 0.709199 |
| C12ORF76  | 12q24.11 | -0.02676 | 0.602041 | 0.709239 |
| ACSM1     | 16p12.3  | -0.02675 | 0.602238 | 0.709395 |
| LINC01142 | 1q24.2   | -0.02675 | 0.602244 | 0.709395 |
| XRCC6P5   | Xq22.1   | 0.026728 | 0.60253  | 0.709678 |
| BRPF3     | 6p21.31  | 0.026726 | 0.602555 | 0.709678 |
| C11ORF40  | 11p15.4  | 0.026714 | 0.602718 | 0.709828 |
| KLK6      | 19q13.41 | -0.02671 | 0.602774 | 0.709853 |
| DEXI      | 16p13.13 | 0.026707 | 0.602809 | 0.709853 |
| OGDH      | 7p13     | 0.026695 | 0.602973 | 0.710004 |
| IL2ORB    | 3q22.3   | 0.026677 | 0.603217 | 0.710241 |
| FAM234A   | 16p13.3  | -0.02667 | 0.603245 | 0.710241 |
| TCP10L2   | 6q27     | -0.02667 | 0.603328 | 0.710297 |
| ATG2B     | 14q32.2  | -0.02666 | 0.603409 | 0.71035  |
| KRT6A     | 12q13.13 | -0.02665 | 0.603586 | 0.710516 |
| UBE3D     | 6q14.1   | 0.026647 | 0.603626 | 0.710521 |
| LARS      | 5q32     | -0.02663 | 0.603886 | 0.710772 |
| SPINT2    | 19q13.2  | 0.026626 | 0.603909 | 0.710772 |
| ANGPTL5   | 11q22.1  | -0.02661 | 0.604177 | 0.711045 |
| MOGAT2    | 11q13.5  | -0.02657 | 0.604701 | 0.711601 |
| TOMM22    | 22q13.1  | -0.02657 | 0.60472  | 0.711601 |
| MBLAC1    | 7q22.1   | -0.02656 | 0.604763 | 0.711609 |
| GJD2      | 15q14    | -0.02655 | 0.604879 | 0.711703 |
| BCORL1    | Xq26.1   | 0.026544 | 0.605031 | 0.711819 |
| ID2       | 2p25.1   | -0.02654 | 0.605048 | 0.711819 |
| ARL8A     | 1q32.1   | -0.02653 | 0.605244 | 0.712008 |
| SCGB1D2   | 11q12.3  | 0.026521 | 0.605341 | 0.71208  |
| SERINC2   | 1p35.2   | -0.02651 | 0.605555 | 0.712252 |
| BCL9L     | 11q23.3  | -0.0265  | 0.605558 | 0.712252 |
| PIN1P1    | 1p31.1   | 0.026496 | 0.605675 | 0.712347 |
| PRSS38    | 1q42.13  | 0.026477 | 0.605935 | 0.712595 |
| FOLH1     | 11p11.12 | -0.02648 | 0.605956 | 0.712595 |
| METTL22   | 16p13.2  | 0.026466 | 0.606088 | 0.712637 |
| KIFC3     | 16q21    | -0.02646 | 0.606112 | 0.712637 |
| GEMIN2    | 14q21.1  | 0.026463 | 0.606126 | 0.712637 |
| CENPB     | 20p13    | 0.026459 | 0.606176 | 0.712637 |
| EPHA8     | 1p36.12  | -0.02646 | 0.606181 | 0.712637 |
| ADAM5     | 8p11.22  | -0.02646 | 0.606206 | 0.712637 |
| MED30     | 8q24.11  | -0.02645 | 0.606317 | 0.712726 |
| IL1RN     | 2q14.1   | 0.026435 | 0.60651  | 0.712911 |
| CPO       | 2q33.3   | 0.026431 | 0.606562 | 0.71293  |
| LMTK3     | 19q13.33 | 0.026421 | 0.606701 | 0.713052 |
| ULK1      | 12q24.33 | -0.0264  | 0.606933 | 0.713282 |
| SRC       | 20q11.23 | 0.026393 | 0.607085 | 0.71342  |
| RBM15B    | 3p21.2   | 0.026383 | 0.607211 | 0.713526 |
| ST5       | 11p15.4  | -0.02638 | 0.607255 | 0.713536 |
| PASD1     | Xq28     | 0.026376 | 0.607311 | 0.713559 |
| NPY6R     | 5q31.2   | 0.026372 | 0.607371 | 0.713561 |
| DDX3Y     | Yq11.221 | -0.02637 | 0.607384 | 0.713561 |
| ZNF558    | 19p13.2  | -0.02636 | 0.607499 | 0.713654 |
| RAB1B     | 11q13.2  | 0.026356 | 0.607587 | 0.713716 |

|           |               |          |          |          |
|-----------|---------------|----------|----------|----------|
| ZNF792    | 19q13.11      | 0.026353 | 0.607625 | 0.713719 |
| COBL      | 7p12.1        | -0.02635 | 0.607672 | 0.713732 |
| ALDH6A1   | 14q24.3       | -0.02634 | 0.607789 | 0.713828 |
| OR6K3     | 1q23.1        | -0.02633 | 0.607937 | 0.71396  |
| NDUFB9    | 8q24.13       | -0.02632 | 0.608068 | 0.714058 |
| GPRIN3    | 4q22.1        | 0.026318 | 0.608106 | 0.714058 |
| CMTM2     | 16q21         | 0.026316 | 0.608128 | 0.714058 |
| TAAR2     | 6q23.2        | 0.026289 | 0.608502 | 0.714455 |
| DUSP16    | 12p13.2       | -0.02627 | 0.608726 | 0.714677 |
| CD44      | 11p13         | 0.026269 | 0.608767 | 0.714683 |
| KLHL42    | 12p11.22      | -0.02625 | 0.609034 | 0.714955 |
| SSX4      | Xp11.23       | 0.026246 | 0.60909  | 0.714978 |
| OSBPL2    | 20q13.33      | 0.026234 | 0.609243 | 0.715081 |
| IL9R      | Xq28 and Yq12 | 0.026234 | 0.609249 | 0.715081 |
| FAM71B    | 5q33.3        | -0.0262  | 0.609679 | 0.715544 |
| NT5C3A    | 7p14.3        | 0.0262   | 0.609716 | 0.715545 |
| LRRC71    | 1q23.1        | 0.026191 | 0.609834 | 0.715642 |
| NECTIN3   | 3q13.13       | -0.02618 | 0.610051 | 0.715822 |
| C1ORF68   | 1q21.3        | -0.02617 | 0.610118 | 0.715822 |
| NSRP1     | 17q11.2       | -0.02617 | 0.610172 | 0.715822 |
| ZBTB7C    | 18q21.1       | 0.026166 | 0.610177 | 0.715822 |
| KRTAP4-7  | 17q21.2       | -0.02617 | 0.610186 | 0.715822 |
| ANGPTL6   | 19p13.2       | -0.02616 | 0.610202 | 0.715822 |
| PRDM14    | 8q13.3        | 0.026158 | 0.61028  | 0.715871 |
| CCT7      | 2p13.2        | 0.026147 | 0.61043  | 0.715978 |
| C12ORF10  | 12q13.13      | -0.02615 | 0.610451 | 0.715978 |
| KRTAP5-6  | 11p15.5       | 0.026144 | 0.610478 | 0.715978 |
| ATF6      | 1q23.3        | -0.02614 | 0.610545 | 0.716015 |
| KRT77     | 12q13.13      | -0.02613 | 0.610731 | 0.716191 |
| VEGFD     | Xp22.2        | -0.02611 | 0.610923 | 0.716374 |
| TSGA10IP  | 11q13.1       | -0.02609 | 0.611163 | 0.716613 |
| FIGLA     | 2p13.3        | -0.02608 | 0.61139  | 0.716838 |
| ZNF669    | 1q44          | 0.026073 | 0.611454 | 0.716871 |
| OPHN1     | Xq12          | -0.02605 | 0.611725 | 0.717146 |
| TRIM38    | 6p22.2        | 0.026031 | 0.612022 | 0.717453 |
| NANP      | 20p11.21      | -0.02602 | 0.61219  | 0.717607 |
| MIR31HG   | 9p21.3        | -0.02602 | 0.612239 | 0.717623 |
| SMIM12    | 1p34.3        | -0.026   | 0.612499 | 0.717885 |
| MRPS10    | 6p21.1        | 0.025991 | 0.612564 | 0.717885 |
| ERCC6     | 10q11.23      | -0.02599 | 0.61257  | 0.717885 |
| RPL18A    | 19p13.11      | -0.02598 | 0.612676 | 0.717967 |
| IFITM5    | 11p15.5       | 0.025971 | 0.61284  | 0.718083 |
| ZNF557    | 19p13.2       | 0.025971 | 0.612846 | 0.718083 |
| COL17A1   | 10q25.1       | 0.025963 | 0.612955 | 0.718169 |
| LPAR5     | 12p13.31      | 0.025953 | 0.613085 | 0.718279 |
| EEF2      | 19p13.3       | 0.025944 | 0.613212 | 0.718385 |
| SLC35G3   | 17q12         | 0.025896 | 0.613875 | 0.71912  |
| IPO7      | 11p15.4       | 0.025888 | 0.613975 | 0.719195 |
| C4ORF50   | 4p16.1        | -0.02588 | 0.614061 | 0.719209 |
| OR1J2     | 9q33.2        | -0.02588 | 0.61408  | 0.719209 |
| TUBBP6    | 7p11.2        | 0.02588  | 0.614094 | 0.719209 |
| LINC00113 | 21q21.3       | -0.02587 | 0.614178 | 0.719251 |
| VWA3A     | 16p12.2       | 0.025871 | 0.614209 | 0.719251 |
| SLC5A8    | 12q23.1-q23.2 | -0.02587 | 0.614238 | 0.719251 |
| KCNV1     | 8q23.2        | -0.02585 | 0.614442 | 0.719448 |
| NUP88     | 17p13.2       | 0.025844 | 0.614579 | 0.719554 |
| PHGR1     | 15q15.1       | 0.025841 | 0.614624 | 0.719554 |
| CEBPA     | 19q13.11      | -0.02584 | 0.61465  | 0.719554 |

|           |          |          |          |          |
|-----------|----------|----------|----------|----------|
| GUCA2B    | 1p34.2   | -0.02584 | 0.614677 | 0.719554 |
| RPH3AL    | 17p13.3  | -0.02583 | 0.614721 | 0.719564 |
| PWAR4     | 15q11.2  | -0.02583 | 0.614761 | 0.719568 |
| FAM71E1   | 19q13.33 | -0.02582 | 0.614851 | 0.719632 |
| DAW1      | 2q36.3   | -0.02581 | 0.6151   | 0.719881 |
| ARMC8     | 3q22.3   | -0.02579 | 0.615255 | 0.71999  |
| HEATR5B   | 2p22.2   | -0.02579 | 0.615388 | 0.71999  |
| KIF2B     | 17q22    | -0.02578 | 0.615396 | 0.71999  |
| SPANXN1   | Xq27.3   | 0.025785 | 0.615396 | 0.71999  |
| OR6Q1     | 11q12.1  | -0.02578 | 0.615396 | 0.71999  |
| ZCCHC9    | 5q14.1   | -0.02578 | 0.615426 | 0.71999  |
| SLC24A5   | 15q21.1  | -0.02578 | 0.615445 | 0.71999  |
| FRG2DP    | 16p11.1  | 0.025742 | 0.615986 | 0.720581 |
| CFC1B     | 2q21.1   | 0.025721 | 0.616268 | 0.720869 |
| PRR35     | 16p13.3  | -0.02571 | 0.616383 | 0.720952 |
| MMP25     | 16p13.3  | 0.02571  | 0.616415 | 0.720952 |
| UGT2A1    | 4q13.3   | -0.02571 | 0.616447 | 0.720952 |
| IGF2R     | 6q25.3   | -0.0257  | 0.616551 | 0.721032 |
| TMC2      | 20p13    | -0.02567 | 0.616923 | 0.72142  |
| MRPL44    | 2q36.1   | -0.02567 | 0.616956 | 0.72142  |
| FOXJ1     | 17q25.1  | -0.02566 | 0.617074 | 0.721492 |
| SP6       | 17q21.32 | 0.025661 | 0.617088 | 0.721492 |
| MYBPC1    | 12q23.2  | 0.025658 | 0.617129 | 0.721497 |
| MGC2889   | 3q29     | 0.025646 | 0.617297 | 0.721652 |
| LCE1A     | 1q21.3   | 0.025588 | 0.618095 | 0.722516 |
| EXOC3L2   | 19q13.32 | -0.02559 | 0.618114 | 0.722516 |
| OR13H1    | Xq26.2   | 0.025584 | 0.618145 | 0.722516 |
| KRT33A    | 17q21.2  | -0.02556 | 0.618414 | 0.722788 |
| DNAJB12   | 10q22.1  | 0.025551 | 0.618605 | 0.72293  |
| LRATD2    | 8q24.21  | 0.02555  | 0.618608 | 0.72293  |
| RBFA      | 18q23    | 0.025535 | 0.618815 | 0.72313  |
| HNF4A     | 20q13.12 | -0.02553 | 0.618945 | 0.723215 |
| TMPRSS11D | 4q13.2   | -0.02552 | 0.61896  | 0.723215 |
| KRT19     | 17q21.2  | 0.025503 | 0.619259 | 0.723517 |
| CDKN2A-DT | 9p21.3   | -0.0255  | 0.61929  | 0.723517 |
| RPS26P11  | Xq13.1   | 0.025471 | 0.619696 | 0.723949 |
| MREG      | 2q35     | -0.02544 | 0.620093 | 0.724371 |
| SPEF2     | 5p13.2   | 0.025431 | 0.62025  | 0.724512 |
| TRIM2     | 4q31.3   | -0.02542 | 0.620366 | 0.724604 |
| SARNP     | 12q13.2  | -0.02538 | 0.620958 | 0.725254 |
| PRKCA     | 17q24.2  | 0.025345 | 0.621429 | 0.72576  |
| POU3F3    | 2q12.1   | 0.025343 | 0.621464 | 0.72576  |
| ZNF480    | 19q13.41 | 0.025335 | 0.621577 | 0.72585  |
| KIR3DL3   | 19q13.42 | 0.025326 | 0.6217   | 0.725951 |
| KIAA1549L | 11p13    | 0.025314 | 0.621865 | 0.726101 |
| KRT28     | 17q21.2  | -0.02529 | 0.622254 | 0.726513 |
| PARS2     | 1p32.3   | -0.02523 | 0.622968 | 0.727243 |
| ZNF442    | 19p13.2  | -0.02523 | 0.623005 | 0.727243 |
| ZNF552    | 19q13.43 | -0.02523 | 0.623023 | 0.727243 |
| SLC35A1   | 6q15     | -0.02523 | 0.623024 | 0.727243 |
| ODF3L2    | 19p13.3  | 0.025225 | 0.623089 | 0.727276 |
| SLC8B1    | 12q24.13 | -0.02522 | 0.623131 | 0.727283 |
| MBL2      | 10q21.1  | -0.02521 | 0.623297 | 0.727406 |
| CLCN7     | 16p13.3  | 0.025209 | 0.623309 | 0.727406 |
| DNAJC14   | 12q13.2  | -0.0252  | 0.623493 | 0.727578 |
| FUT8      | 14q23.3  | -0.02514 | 0.624235 | 0.728377 |
| RBMXL3    | Xq23     | -0.02514 | 0.624308 | 0.728377 |
| UTY       | Yq11.221 | -0.02514 | 0.62432  | 0.728377 |

|                 |              |          |          |          |
|-----------------|--------------|----------|----------|----------|
| CCDC59          | 12q21.31     | -0.02513 | 0.624339 | 0.728377 |
| UBIAD1          | 1p36.22      | -0.02513 | 0.624393 | 0.728377 |
| DNAJA1          | 9p21.1       | -0.02513 | 0.624396 | 0.728377 |
| PDZD7           | 10q24.31     | -0.02512 | 0.624468 | 0.728419 |
| FGF21           | 19q13.33     | 0.025119 | 0.624542 | 0.728463 |
| ATAD3C          | 1p36.33      | -0.02511 | 0.624667 | 0.728566 |
| UBE4B           | 1p36.22      | 0.025107 | 0.624714 | 0.728578 |
| AKAP11          | 13q14.11     | 0.025059 | 0.625379 | 0.729311 |
| EIF1AX          | Xp22.12      | -0.02503 | 0.625834 | 0.729798 |
| USP3            | 15q22.31     | 0.025023 | 0.625869 | 0.729798 |
| LSM14A          | 19q13.11     | -0.02499 | 0.626384 | 0.730356 |
| MAPKAP1         | 9q33.3       | -0.02495 | 0.626818 | 0.730819 |
| SIM1            | 6q16.3       | 0.024951 | 0.626865 | 0.730832 |
| PRDX3           | 10q26.11     | -0.02494 | 0.627032 | 0.730984 |
| HELZ            | 17q24.2      | -0.02493 | 0.627109 | 0.73103  |
| ABRAXAS2        | 10q26.13     | -0.02493 | 0.627163 | 0.73103  |
| IL1F10          | 2q14.1       | -0.02493 | 0.627181 | 0.73103  |
| FUT10           | 8p12         | -0.02492 | 0.627246 | 0.731063 |
| FAM71F1         | 7q32.1       | 0.024909 | 0.627452 | 0.731261 |
| WDR20           | 14q32.31     | 0.024903 | 0.627535 | 0.731303 |
| SP5             | 2q31.1       | 0.024901 | 0.627562 | 0.731303 |
| AKR1C6P         | 10p15.1      | 0.024891 | 0.627699 | 0.731388 |
| CCND2           | 12p13.32     | 0.02489  | 0.627708 | 0.731388 |
| GP2             | 16p12.3      | 0.024884 | 0.627789 | 0.731417 |
| ACAD8           | 11q25        | -0.02488 | 0.627806 | 0.731417 |
| SATL1           | Xq21.1       | -0.02488 | 0.627862 | 0.731441 |
| RFX7            | 15q21.3      | -0.02487 | 0.627931 | 0.731443 |
| CNBD1           | 8q21.3       | 0.024872 | 0.627958 | 0.731443 |
| RCAN3           | 1p36.11      | 0.024871 | 0.627974 | 0.731443 |
| KRTAP27-1       | 21q22.11     | 0.024855 | 0.62819  | 0.731652 |
| MLYCD           | 16q23.3      | -0.02484 | 0.628434 | 0.731894 |
| MRPS31          | 13q14.11     | -0.02483 | 0.628502 | 0.731927 |
| EIF4A1          | 17p13.1      | -0.02483 | 0.628535 | 0.731927 |
| LL22NC03-63E9.3 | 22q11.22     | -0.02481 | 0.628761 | 0.732147 |
| FOXC1           | 6p25.3       | 0.024806 | 0.628878 | 0.732202 |
| SST             | 3q27.3       | -0.0248  | 0.628923 | 0.732202 |
| LOR             | 1q21.3       | -0.0248  | 0.628927 | 0.732202 |
| AMOT            | Xq23         | 0.024798 | 0.628979 | 0.732202 |
| PRKCZ           | 1p36.33      | 0.024797 | 0.628991 | 0.732202 |
| LINC01278       | Xq11.1       | -0.02479 | 0.629094 | 0.732279 |
| TPD52L1         | 6q22.31      | -0.02478 | 0.629292 | 0.732442 |
| RABGAP1         | 9q33.2-q33.3 | -0.02477 | 0.629307 | 0.732442 |
| WSB1            | 17q11.1      | 0.024765 | 0.629435 | 0.732548 |
| THOC7           | 3p14.1       | 0.024759 | 0.629527 | 0.732582 |
| HPVC1           | 7p11.2       | -0.02476 | 0.629537 | 0.732582 |
| CREB3L3         | 19p13.3      | 0.024755 | 0.629573 | 0.732582 |
| ZNF391          | 6p22.1       | -0.02474 | 0.629804 | 0.732808 |
| PADI1           | 1p36.13      | 0.024727 | 0.629962 | 0.732949 |
| KLF4            | 9q31.2       | 0.024724 | 0.630001 | 0.732952 |
| TMEM41A         | 3q27.2       | -0.02472 | 0.630049 | 0.732965 |
| MOG             | 6p22.1       | -0.02471 | 0.630235 | 0.733139 |
| FUT6            | 19p13.3      | 0.024702 | 0.630308 | 0.733181 |
| MYCBPAP         | 17q21.33     | -0.02469 | 0.630496 | 0.733296 |
| CRHR2           | 7p14.3       | -0.02469 | 0.630507 | 0.733296 |
| SBSPON          | 8q21.11      | 0.024687 | 0.630517 | 0.733296 |
| ERLIN1          | 10q24.31     | 0.024684 | 0.630565 | 0.733309 |
| PTPN7           | 1q32.1       | -0.02467 | 0.630708 | 0.733418 |
| ERO1A           | 14q22.1      | -0.02467 | 0.630732 | 0.733418 |



|           |                |          |          |          |
|-----------|----------------|----------|----------|----------|
| VIPR1     | 3p22.1         | 0.024662 | 0.630869 | 0.733535 |
| ULBP3     | 6q25.1         | -0.02466 | 0.630925 | 0.733558 |
| IFI27L1   | 14q32.12       | 0.024649 | 0.631042 | 0.733651 |
| AADACL3   | 1p36.21        | -0.02463 | 0.631267 | 0.73387  |
| ZNF534    | 19q13.41       | -0.02462 | 0.631462 | 0.734055 |
| C15ORF56  | 15q15.1        | -0.02461 | 0.631537 | 0.734099 |
| FAM138D   | 12p13.33       | 0.024607 | 0.631627 | 0.734125 |
| ZSCAN16   | 6p22.1         | 0.024607 | 0.631633 | 0.734125 |
| CSHL1     | 17q23.3        | 0.024604 | 0.631676 | 0.734133 |
| ASPG      | 14q32.33       | -0.02458 | 0.631942 | 0.734336 |
| TMEM189   | 20q13.13       | 0.024582 | 0.631973 | 0.734336 |
| MPZL1     | 1q24.2         | 0.02458  | 0.632003 | 0.734336 |
| SYT5      | 19q13.42 11p   | 0.024578 | 0.632028 | 0.734336 |
| DGCR6     | 22q11.21 22q11 | -0.02458 | 0.632044 | 0.734336 |
| SCNN1A    | 12p13.31       | 0.024575 | 0.632071 | 0.734336 |
| UQCR11    | 19p13.3        | 0.024566 | 0.6322   | 0.734443 |
| KDM6A     | Xp11.3         | -0.02456 | 0.632244 | 0.734452 |
| TMEM179   | 14q32.33       | -0.02455 | 0.632399 | 0.734589 |
| KLF1      | 19p13.13       | 0.024532 | 0.632675 | 0.734867 |
| BCKDK     | 16p11.2        | 0.024527 | 0.63274  | 0.7349   |
| LMOD3     | 3p14.1         | 0.024516 | 0.632889 | 0.73503  |
| GFM1      | 3q25.32        | 0.0245   | 0.633113 | 0.735249 |
| SSH2      | 17q11.2        | 0.024495 | 0.633185 | 0.735289 |
| GPKOW     | Xp11.23        | 0.024487 | 0.63329  | 0.735368 |
| C1ORF146  | 1p22.1         | -0.02448 | 0.63333  | 0.735373 |
| PCNAP1    | 4q23           | -0.02447 | 0.633494 | 0.735521 |
| SLC48A1   | 12q13.11       | 0.024447 | 0.633848 | 0.735889 |
| TIMM21    | 18q22.3        | 0.024441 | 0.633932 | 0.735943 |
| OR5K1     | 3q11.2         | -0.02443 | 0.634024 | 0.736008 |
| OR1J4     | 9q33.2         | 0.024428 | 0.634114 | 0.736069 |
| LUZP1     | 1p36.12        | 0.024403 | 0.634458 | 0.736401 |
| PRH1      | 12p13.2        | 0.024402 | 0.634473 | 0.736401 |
| FDX2      | 19p13.2        | -0.02439 | 0.634659 | 0.736573 |
| INAFM1    | 19q13.32       | -0.02438 | 0.634718 | 0.7366   |
| ULBP2     | 6q25.1         | 0.024376 | 0.634829 | 0.736686 |
| ALDOB     | 9q31.1         | -0.02436 | 0.635104 | 0.736951 |
| MAGI3     | 1p13.2         | 0.024355 | 0.635131 | 0.736951 |
| TDRD3     | 13q21.2        | -0.02435 | 0.635227 | 0.737019 |
| HIST2H2BA | 1p11.2         | 0.02433  | 0.635474 | 0.737264 |
| LINGO4    | 1q21.3         | 0.024324 | 0.63556  | 0.73732  |
| SELENBP1  | 1q21.3         | 0.024305 | 0.635816 | 0.737575 |
| LINC01634 | 22q11.21       | -0.02427 | 0.636286 | 0.738078 |
| SEC61B    | 9q22.33        | 0.024246 | 0.636639 | 0.738444 |
| FGF4      | 11q13.3        | 0.024218 | 0.637026 | 0.738849 |
| CYHR1     | 8q24.3         | -0.02419 | 0.637382 | 0.739177 |
| SNX5      | 20p11.23       | -0.02419 | 0.637382 | 0.739177 |
| LOC401127 | 4p14           | -0.02418 | 0.637505 | 0.739271 |
| C2ORF69   | 2q33.1         | -0.02418 | 0.637577 | 0.739271 |
| RAC1      | 7p22.1         | 0.024178 | 0.637586 | 0.739271 |
| RPL29P2   | 17p13.1        | -0.02418 | 0.63761  | 0.739271 |
| GPR63     | 6q16.1         | 0.024171 | 0.637683 | 0.739312 |
| LMO7      | 13q22.2        | 0.024158 | 0.637861 | 0.739476 |
| ZNF469    | 16q24.2        | -0.02415 | 0.637978 | 0.739563 |
| B4GALNT4  | 11p15.5        | 0.024148 | 0.63801  | 0.739563 |
| OR4C15    | 11q11          | 0.02413  | 0.638256 | 0.739795 |
| DHRS11    | 17q12          | 0.024128 | 0.638284 | 0.739795 |
| MCOLN2    | 1p22.3         | 0.024125 | 0.638323 | 0.739797 |
| USB1      | 16q21          | 0.024122 | 0.638365 | 0.739803 |

|           |                    |          |          |          |
|-----------|--------------------|----------|----------|----------|
| IZUMO2    | 19q13.33           | 0.024116 | 0.638452 | 0.739861 |
| KRT3      | 12q13.13           | -0.02411 | 0.6385   | 0.739874 |
| TUSC7     | 3q13.31            | 0.024095 | 0.638745 | 0.740114 |
| H1FNT     | 12q13.11           | 0.02408  | 0.638946 | 0.740305 |
| KIR3DL2   | 19q13.42           | -0.02407 | 0.639022 | 0.740306 |
| PTP4A2    | 1p35.2             | 0.024075 | 0.639028 | 0.740306 |
| SF3A1     | 22q12.2            | -0.02407 | 0.639058 | 0.740306 |
| LIMK1     | 7q11.23            | 0.024062 | 0.639199 | 0.740426 |
| WDR93     | 15q26.1            | -0.02406 | 0.639254 | 0.740448 |
| TRAM2     | 6p12.2             | -0.02404 | 0.639456 | 0.740615 |
| LHX3      | 9q34.3             | 0.024043 | 0.639472 | 0.740615 |
| CREB3L2   | 7q33               | 0.024038 | 0.63954  | 0.740651 |
| C5ORF22   | 5p13.3             | -0.02403 | 0.639648 | 0.740733 |
| BCL11A    | 2p16.1             | -0.02402 | 0.63975  | 0.740808 |
| SPATC1    | 8q24.3             | 0.024012 | 0.639894 | 0.740909 |
| SPRR2A    | 1q21.3             | 0.024011 | 0.639911 | 0.740909 |
| PARP12    | 7q34               | -0.024   | 0.640036 | 0.74101  |
| G2E3      | 14q12              | 0.023991 | 0.640186 | 0.741057 |
| LRFN3     | 19q13.12           | 0.023988 | 0.640234 | 0.741057 |
| SLC30A8   | 8q24.11            | -0.02399 | 0.640244 | 0.741057 |
| LINC02591 | 1q21.1             | -0.02399 | 0.640246 | 0.741057 |
| LOC440896 | 9p11.2             | 0.023986 | 0.640261 | 0.741057 |
| LRIT2     | 10q23.1            | -0.02396 | 0.64058  | 0.741383 |
| MSX1      | 4p16.2             | 0.02395  | 0.640768 | 0.741558 |
| OTC       | Xp11.4             | -0.02394 | 0.640883 | 0.741648 |
| OR11H1    | 22q11.1            | 0.023926 | 0.641096 | 0.741852 |
| COCH      | 14q12              | -0.0239  | 0.641456 | 0.742225 |
| CFAP100   | 3q21.3             | -0.0239  | 0.641498 | 0.742231 |
| HSD3B2    | 1p12               | -0.02389 | 0.641574 | 0.742277 |
| ARPC1A    | 7q22.1             | 0.023887 | 0.641645 | 0.742315 |
| LCMT2     | 15q15.3            | 0.023882 | 0.641714 | 0.742337 |
| TMC4      | 19q13.42           | -0.02388 | 0.641738 | 0.742337 |
| ZSCAN5B   | 19q13.43           | -0.02388 | 0.641783 | 0.742347 |
| EIF3M     | 11p13              | -0.02387 | 0.641903 | 0.742443 |
| ZNF44     | 19p13.2            | -0.02385 | 0.642195 | 0.742737 |
| RPTN      | 1q21.3             | -0.02384 | 0.642235 | 0.742741 |
| LRCH3     | 3q29               | -0.02383 | 0.642378 | 0.742863 |
| USP17L2   | 8p23.1             | -0.02383 | 0.642508 | 0.742906 |
| PUM1      | 1p35.2             | 0.023823 | 0.642536 | 0.742906 |
| CYP2A6    | 19q13.2            | -0.02382 | 0.642587 | 0.742906 |
| CCDC183   | 9q34.3             | 0.023819 | 0.642597 | 0.742906 |
| SOGA1     | 20q11.23           | 0.023818 | 0.6426   | 0.742906 |
| SHOX      | Xp22.33 and Yp11.2 | -0.02381 | 0.642658 | 0.742929 |
| ACTL10    | 20q11.22           | -0.0238  | 0.642823 | 0.743077 |
| C4ORF45   | 4q32.1             | 0.023797 | 0.642901 | 0.743125 |
| TSIX      | Xq13.2             | -0.02379 | 0.64294  | 0.743126 |
| TAB1      | 22q13.1            | 0.023785 | 0.643072 | 0.743204 |
| CHTF8     | 16q22.1            | -0.02378 | 0.643081 | 0.743204 |
| ATP1B3    | 3q23               | -0.02378 | 0.643157 | 0.743248 |
| ABCA10    | 17q24.3            | 0.023761 | 0.643398 | 0.743485 |
| RPL13P5   | 12p13.31           | -0.02373 | 0.643881 | 0.743985 |
| ENOPH1    | 4q21.22            | 0.023725 | 0.643905 | 0.743985 |
| CSN3      | 4q13.3             | 0.023694 | 0.644335 | 0.744438 |
| DEFB4A    | 8p23.1             | -0.02367 | 0.644645 | 0.744754 |
| TRMT10C   | 3q12.3             | 0.023652 | 0.644926 | 0.745035 |
| ULK4P2    | 15q13.2            | -0.02364 | 0.645026 | 0.745069 |
| DEPDC7    | 11p13              | -0.02364 | 0.645037 | 0.745069 |
| SLC25A31  | 4q28.1             | -0.02364 | 0.645067 | 0.745069 |

|             |                |          |          |          |
|-------------|----------------|----------|----------|----------|
| SPATA31A6   | 9p11.2         | -0.02363 | 0.64518  | 0.745157 |
| ZP4         | 1q43           | -0.02362 | 0.645335 | 0.745293 |
| OR2L2       | 1q44           | -0.02361 | 0.645445 | 0.745378 |
| SNORA84     | 9q22.31        | 0.023594 | 0.645733 | 0.745667 |
| CRYGB       | 2q33.3         | -0.02359 | 0.645836 | 0.7457   |
| PRR13       | 12q13.13       | 0.023585 | 0.645868 | 0.7457   |
| RAB5IF      | 20q11.23       | -0.02358 | 0.645874 | 0.7457   |
| ANKRD13A    | 12q24.11       | 0.023569 | 0.646088 | 0.745904 |
| IRS2        | 13q34          | -0.02356 | 0.646172 | 0.745959 |
| NAA38       | 17p13.1        | -0.02355 | 0.646365 | 0.746138 |
| RNF32       | 7q36.3         | 0.023542 | 0.646465 | 0.746185 |
| TTC9C       | 11q12.3        | 0.023541 | 0.64648  | 0.746185 |
| RGL4        | 22q11.23       | 0.023534 | 0.646577 | 0.746254 |
| RPL6        | 12q24.13       | -0.02351 | 0.64698  | 0.74665  |
| UPP1        | 7p12.3         | -0.0235  | 0.646995 | 0.74665  |
| SPINK2      | 4q12           | -0.02348 | 0.647355 | 0.746999 |
| PRKAR2A     | 3p21.31        | 0.023477 | 0.647372 | 0.746999 |
| P4HB        | 17q25.3        | -0.02344 | 0.647884 | 0.747548 |
| ANGPTL4     | 19p13.2        | 0.023431 | 0.64802  | 0.747661 |
| ZP2         | 16p12.3-p12.2  | 0.023426 | 0.648088 | 0.747682 |
| ABCG4       | 11q23.3        | -0.02342 | 0.648113 | 0.747682 |
| SLC25A5-AS1 | Xq24           | -0.02341 | 0.648352 | 0.747915 |
| ACTRT1      | Xq25           | -0.0234  | 0.648464 | 0.747994 |
| GPC4        | Xq26.2         | -0.0234  | 0.648497 | 0.747994 |
| NMBR        | 6q24.1         | 0.023394 | 0.648533 | 0.747994 |
| ZC3H12B     | Xq11.2-q12     | -0.02339 | 0.648602 | 0.748031 |
| GGT3P       | 22q11.21       | -0.02337 | 0.648862 | 0.748287 |
| OR7E91P     | 2p13.3         | -0.02335 | 0.649121 | 0.748543 |
| GIP         | 17q21.32       | -0.02334 | 0.649277 | 0.748679 |
| C12ORF66    | 12q14.2        | -0.02333 | 0.649448 | 0.748833 |
| EPB41L4A    | 5q22.1-q22.2   | -0.02332 | 0.649505 | 0.748856 |
| SLC35A2     | Xp11.23        | 0.023315 | 0.649647 | 0.748977 |
| CARNS1      | 11q13.2        | 0.023311 | 0.649704 | 0.749    |
| ZNF732      | 4p16.3         | 0.023307 | 0.649762 | 0.749023 |
| IMP3        | 15q24.2        | -0.02329 | 0.649997 | 0.749251 |
| IFT27       | 22q12.3        | 0.023286 | 0.650054 | 0.749259 |
| BANF1       | 11q13.1        | -0.02328 | 0.650079 | 0.749259 |
| GPR156      | 3q13.33        | -0.02327 | 0.650223 | 0.749382 |
| GKN2        | 2p13.3         | 0.023261 | 0.650402 | 0.749545 |
| MAP2K3      | 17p11.2        | 0.023243 | 0.65065  | 0.749749 |
| OR9A4       | 7q34           | 0.023243 | 0.650654 | 0.749749 |
| NEK3        | 13q14.3        | 0.023227 | 0.650882 | 0.749969 |
| C5ORF30     | 5q21.1         | 0.023221 | 0.650964 | 0.75002  |
| ATP1A3      | 19q13.2        | 0.023218 | 0.651006 | 0.750026 |
| ARL6IP4     | 12q24.31       | -0.0232  | 0.651193 | 0.750199 |
| TPRX1       | 19q13.33       | -0.02319 | 0.651354 | 0.75034  |
| TMEM187     | Xq28           | -0.02315 | 0.651901 | 0.750927 |
| CCDC140     | 2q36.1         | 0.023146 | 0.65202  | 0.751021 |
| GAGE2D      | Xp11.23        | -0.02314 | 0.65209  | 0.751058 |
| SCO2        | 22q13.33       | 0.023133 | 0.652197 | 0.751139 |
| CDC14B      | 9q22.32-q22.33 | 0.023117 | 0.652421 | 0.751353 |
| SCARNA21    | 17p13.1        | 0.023103 | 0.652622 | 0.751542 |
| HERC1       | 15q22.31       | 0.023097 | 0.652705 | 0.751594 |
| PTGES       | 9q34.11        | 0.023091 | 0.652793 | 0.751639 |
| DOCK3       | 3p21.2         | 0.023089 | 0.652819 | 0.751639 |
| REEP6       | 19p13.3        | 0.023084 | 0.652884 | 0.751662 |
| TJP1        | 15q13.1        | 0.023082 | 0.652914 | 0.751662 |
| FAM86EP     | 4p16.3         | 0.023055 | 0.653292 | 0.752054 |

|              |                |          |          |          |
|--------------|----------------|----------|----------|----------|
| MRPL27       | 17q21.33       | 0.023045 | 0.653434 | 0.752175 |
| OR8A1        | 11q24.2        | -0.02304 | 0.653574 | 0.752292 |
| TRIM33       | 1p13.2         | 0.023026 | 0.653704 | 0.752398 |
| SPRR1B       | 1q21.3         | 0.023012 | 0.653904 | 0.752585 |
| INHBE        | 12q13.3        | 0.023007 | 0.65397  | 0.752618 |
| ATP5PB       | 1p13.2         | -0.023   | 0.6541   | 0.752693 |
| OR5T1        | 11q12.1        | -0.023   | 0.654111 | 0.752693 |
| UGGT2        | 13q32.1        | -0.02298 | 0.654337 | 0.75291  |
| PPP2R2A      | 8p21.2         | -0.02296 | 0.654567 | 0.753119 |
| SYCE1        | 10q26.3        | -0.02296 | 0.654617 | 0.753119 |
| NDUFA12      | 12q22          | -0.02296 | 0.654643 | 0.753119 |
| ACAT1        | 11q22.3        | 0.022955 | 0.654697 | 0.753119 |
| PRG1         | 19q13.31       | -0.02295 | 0.654707 | 0.753119 |
| C9ORF72      | 9p21.2         | -0.02295 | 0.65478  | 0.753161 |
| DAZ3         | Yq11.23        | 0.022914 | 0.655284 | 0.753617 |
| SLC51B       | 15q22.31       | 0.022913 | 0.655286 | 0.753617 |
| KLHDC10      | 7q32.2         | 0.022912 | 0.655303 | 0.753617 |
| CSF3R        | 1p34.3         | -0.02291 | 0.655327 | 0.753617 |
| NFKB2        | 10q24.32       | 0.022908 | 0.655367 | 0.753619 |
| SNORA11E     | Xp11.22        | -0.0229  | 0.655436 | 0.753655 |
| DAZ2         | Yq11.223       | 0.022897 | 0.655523 | 0.753712 |
| SPRED3       | 19q13.2        | 0.022881 | 0.655738 | 0.753916 |
| C17ORF47     | 17q22          | -0.02287 | 0.655941 | 0.754107 |
| TTI1         | 20q11.23       | 0.022862 | 0.656006 | 0.754133 |
| FN3K         | 17q25.3        | 0.02286  | 0.656039 | 0.754133 |
| TYW1B        | 7q11.22-q11.23 | -0.02284 | 0.656339 | 0.754434 |
| HSF2         | 6q22.31        | -0.02283 | 0.656491 | 0.754565 |
| SMIM15       | 5q12.1         | -0.02282 | 0.656609 | 0.754658 |
| ZNF623       | 8q24.3         | 0.022815 | 0.656676 | 0.754691 |
| TAS1R2       | 1p36.13        | -0.02281 | 0.656736 | 0.754717 |
| AIF1L        | 9q34.12-q34.13 | -0.0228  | 0.656843 | 0.754796 |
| TRIM58       | 1q44           | 0.022793 | 0.656986 | 0.754917 |
| FSCN3        | 7q32.1         | 0.02279  | 0.657023 | 0.754917 |
| TIFA         | 4q25           | -0.02278 | 0.657177 | 0.755024 |
| PLAAT1       | 3q29           | -0.02278 | 0.657191 | 0.755024 |
| ITIH6        | Xp11.22        | -0.02277 | 0.657259 | 0.755058 |
| CALHM3       | 10q24.33       | -0.02277 | 0.657317 | 0.755081 |
| IFT80        | 3q25.33        | 0.022766 | 0.657365 | 0.755093 |
| EHF          | 11p13          | -0.02276 | 0.65751  | 0.755217 |
| NTSR1        | 20q13.33       | 0.022748 | 0.657616 | 0.755294 |
| DKFZP434L192 | 7p11.2         | 0.022731 | 0.657854 | 0.755525 |
| VPS26C       | 21q22.13       | -0.02273 | 0.657893 | 0.755526 |
| AP3M1        | 10q22.2        | 0.022722 | 0.657987 | 0.755591 |
| PSPH         | 7p11.2         | 0.022717 | 0.658053 | 0.755624 |
| PPIAL4D      | 1q21.1         | 0.022713 | 0.658109 | 0.755644 |
| FAM47E       | 4q21.1         | 0.022702 | 0.658266 | 0.755776 |
| MRPL36       | 5p15.33        | 0.0227   | 0.658299 | 0.755776 |
| HIST1H2BG    | 6p22.2         | 0.022683 | 0.65853  | 0.755998 |
| H1FOO        | 3q22.1         | 0.022677 | 0.658614 | 0.756013 |
| GK2          | 4q21.21        | -0.02268 | 0.658619 | 0.756013 |
| OGG1         | 3p25.3         | -0.02267 | 0.65873  | 0.756098 |
| ARHGAP45     | 19p13.3        | 0.022655 | 0.658931 | 0.756284 |
| ZNF764       | 16p11.2        | 0.022636 | 0.659192 | 0.756541 |
| SRP72        | 4q12           | -0.02263 | 0.659234 | 0.756546 |
| FLJ36000     | 17p11.2        | 0.022626 | 0.659341 | 0.756625 |
| ARMC2        | 6q21           | -0.02262 | 0.65949  | 0.756699 |
| SYCN         | 19q13.2        | 0.022614 | 0.659509 | 0.756699 |
| GNG5         | 1p22.3         | -0.02261 | 0.659553 | 0.756699 |

|           |               |          |          |          |
|-----------|---------------|----------|----------|----------|
| NDUFA2    | 5q31.3        | -0.02261 | 0.659556 | 0.756699 |
| RAPGEF6   | 5q31.1        | 0.022583 | 0.659945 | 0.757053 |
| STK24     | 13q32.2       | -0.02258 | 0.659967 | 0.757053 |
| CT45A4    | Xq26.3        | 0.022581 | 0.659979 | 0.757053 |
| SNORA74B  | 5q35.1        | 0.022574 | 0.660071 | 0.757116 |
| TIMM17B   | Xp11.23       | 0.022564 | 0.660219 | 0.757233 |
| ENTPD7    | 10q24.2       | -0.02256 | 0.660277 | 0.757233 |
| SPAG11A   | 8p23.1        | -0.02256 | 0.660287 | 0.757233 |
| SCEL      | 13q22.3       | -0.02256 | 0.660329 | 0.757239 |
| KCNK6     | 19q13.2       | 0.022548 | 0.660435 | 0.757316 |
| MIR1-1HG  | 20q13.33      | 0.022542 | 0.660523 | 0.757352 |
| RIC1      | 9p24.1        | -0.02254 | 0.660602 | 0.757352 |
| GPATCH11  | 2p22.2        | -0.02254 | 0.660619 | 0.757352 |
| BPIFB6    | 20q11.21      | 0.022532 | 0.660658 | 0.757352 |
| VN1R5     | 1q44          | -0.02253 | 0.660658 | 0.757352 |
| MET       | 7q31.2        | -0.02253 | 0.660693 | 0.757352 |
| LINC00028 | 20q11.21      | -0.02252 | 0.660772 | 0.75736  |
| TMTC2     | 12q21.31      | 0.022524 | 0.660775 | 0.75736  |
| OXLD1     | 17q25.3       | 0.022521 | 0.660818 | 0.757365 |
| AP2A2     | 11p15.5       | -0.02251 | 0.660945 | 0.757468 |
| BTG4      | 11q23.1       | -0.02251 | 0.661017 | 0.757507 |
| KIAA1109  | 4q27          | -0.0225  | 0.661179 | 0.75765  |
| OR52N2    | 11p15.4       | 0.02248  | 0.661392 | 0.757805 |
| YTHDF2    | 1p35.3        | 0.022478 | 0.661426 | 0.757805 |
| SCARNA8   | 9p22.1        | 0.022478 | 0.661429 | 0.757805 |
| ZNF354A   | 5q35.3        | 0.022473 | 0.661494 | 0.757837 |
| GHRHR     | 7p14.3        | -0.02246 | 0.661655 | 0.757978 |
| SLCO1B7   | 12p12.2       | 0.022453 | 0.661781 | 0.758056 |
| PRAMEF11  | 1p36.21       | -0.02245 | 0.661799 | 0.758056 |
| PTPRD     | 9p24.1-p23    | -0.02243 | 0.662052 | 0.75826  |
| CPSF4L    | 17q25.1       | -0.02243 | 0.662053 | 0.75826  |
| PRSS58    | 7q34          | -0.02237 | 0.66297  | 0.759267 |
| JUNB      | 19p13.13      | -0.02237 | 0.663008 | 0.759267 |
| TACO1     | 17q23.3       | 0.022353 | 0.663188 | 0.759429 |
| EQTN      | 9p21.2        | 0.022348 | 0.66326  | 0.759452 |
| C6ORF58   | 6q22.33       | -0.02234 | 0.663315 | 0.759452 |
| HACE1     | 6q16.3        | -0.02234 | 0.663322 | 0.759452 |
| KDM6B     | 17p13.1       | 0.022341 | 0.663367 | 0.759461 |
| MAU2      | 19p13.11      | 0.022328 | 0.663541 | 0.759617 |
| LOC153910 | 6q24.2        | -0.02232 | 0.663605 | 0.759647 |
| OR8D1     | 11q24.2       | 0.02232  | 0.663662 | 0.759669 |
| ZNF33B    | 10q11.21      | 0.022309 | 0.663818 | 0.759775 |
| ZC2HC1C   | 14q24.3       | -0.02231 | 0.663839 | 0.759775 |
| NANOGNB   | 12p13.31      | 0.022305 | 0.663869 | 0.759775 |
| DHRS9     | 2q31.1        | 0.02228  | 0.66422  | 0.760133 |
| USP32     | 17q23.1-q23.2 | -0.02225 | 0.664598 | 0.760522 |
| TASOR     | 3p14.3        | 0.022229 | 0.664942 | 0.760873 |
| YWHAH     | 22q12.3       | 0.022201 | 0.665341 | 0.761286 |
| DPY19L2   | 12q14.2       | -0.0222  | 0.665412 | 0.761323 |
| C3ORF20   | 3p25.1        | -0.02218 | 0.665608 | 0.761464 |
| PPP1R8    | 1p35.3        | -0.02218 | 0.665625 | 0.761464 |
| OR4C3     | 11p11.2       | 0.02218  | 0.665649 | 0.761464 |
| ERAS      | Xp11.23       | 0.022159 | 0.665934 | 0.761705 |
| CIDEC     | 3p25.3        | -0.02216 | 0.665936 | 0.761705 |
| MRPL35    | 2p11.2        | -0.02216 | 0.665994 | 0.761728 |
| SNORA44   | 1p35.3        | -0.02214 | 0.666144 | 0.761856 |
| C3ORF84   | 3p21.31       | 0.022133 | 0.666307 | 0.762    |
| OR2A1     | 7q35          | -0.02213 | 0.66635  | 0.762004 |

|            |              |          |          |          |
|------------|--------------|----------|----------|----------|
| SLC25A51P1 | 6q12         | 0.022125 | 0.666426 | 0.762048 |
| SNORD97    | 11p15.4      | -0.02212 | 0.666526 | 0.762088 |
| C15ORF39   | 15q24.2      | 0.022117 | 0.666537 | 0.762088 |
| SQOR       | 15q21.1      | -0.02211 | 0.666641 | 0.762158 |
| WFDC13     | 20q13.12     | 0.022107 | 0.666674 | 0.762158 |
| ELK1       | Xp11.23      | 0.0221   | 0.666778 | 0.762227 |
| GPR31      | 6q27         | -0.0221  | 0.666811 | 0.762227 |
| PCYT1A     | 3q29         | 0.022084 | 0.667007 | 0.762385 |
| LOC285074  | 2p11.2       | -0.02208 | 0.667043 | 0.762385 |
| LINC01777  | 1p36.32      | -0.02208 | 0.667063 | 0.762385 |
| TTY16      | Yp11.2       | -0.02207 | 0.667231 | 0.762534 |
| ECI1       | 16p13.3      | 0.022062 | 0.667309 | 0.762579 |
| NSFL1C     | 20p13        | -0.02205 | 0.667507 | 0.762756 |
| CCDC144B   | 17p11.2      | -0.02205 | 0.66754  | 0.762756 |
| PCAT18     | 18q11.2      | -0.02204 | 0.667603 | 0.762784 |
| LOXHD1     | 18q21.1      | -0.02203 | 0.66771  | 0.762863 |
| COPRS      | 17q11.2      | -0.02202 | 0.667855 | 0.762986 |
| KRT8P41    | 11p15.4      | 0.022016 | 0.667968 | 0.763071 |
| DUSP21     | Xp11.3       | -0.02201 | 0.668104 | 0.763182 |
| STAB1      | 3p21.1       | -0.022   | 0.668228 | 0.76328  |
| VBP1       | Xq28         | 0.021995 | 0.668267 | 0.763282 |
| SLURP1     | 8q24.3       | 0.021988 | 0.668368 | 0.763333 |
| OR10C1     | 6p22.1       | -0.02198 | 0.66842  | 0.763333 |
| DPP8       | 15q22.31     | -0.02198 | 0.668426 | 0.763333 |
| PP12613    | 4q27         | -0.02198 | 0.668539 | 0.763379 |
| SPRR2D     | 1q21.3       | -0.02198 | 0.668543 | 0.763379 |
| TFAP2B     | 6p12.3       | 0.02197  | 0.668623 | 0.763386 |
| ATP5MGL    | 22q13.2      | -0.02197 | 0.668625 | 0.763386 |
| PRPS1      | Xq22.3       | 0.021966 | 0.668683 | 0.763408 |
| FAM47B     | Xp21.1       | 0.021947 | 0.668948 | 0.763668 |
| BCL2L11    | 2q13         | -0.02193 | 0.669202 | 0.763888 |
| DNAH7      | 2q32.3       | 0.021928 | 0.669217 | 0.763888 |
| ZFAT       | 8q24.22      | -0.02191 | 0.669425 | 0.764052 |
| FAM222A    | 12q24.11     | 0.021912 | 0.669437 | 0.764052 |
| IQC�       | 19p13.11     | -0.02188 | 0.669871 | 0.764504 |
| C4ORF48    | 4p16.3       | 0.021869 | 0.670052 | 0.764658 |
| PLA2G4D    | 15q15.1      | -0.02187 | 0.670083 | 0.764658 |
| OR8D4      | 11q24.1      | -0.02185 | 0.670276 | 0.764835 |
| KRTAP10-7  | 21q22.3      | 0.021847 | 0.670371 | 0.7649   |
| FAM86B1    | 8p23.1       | 0.021819 | 0.670764 | 0.765305 |
| GAREM1     | 18q12.1      | 0.021816 | 0.670804 | 0.765305 |
| KAT6A      | 8p11.21      | -0.02181 | 0.670841 | 0.765305 |
| SERPINB4   | 18q21.33     | 0.021804 | 0.670973 | 0.765381 |
| CTDP1      | 18q23        | 0.021801 | 0.671012 | 0.765381 |
| ZNF875     | 19q13.12     | 0.0218   | 0.671027 | 0.765381 |
| WDR5B      | 3q21.1       | -0.0218  | 0.671061 | 0.765381 |
| FAM210A    | 18p11.21     | 0.021792 | 0.67114  | 0.765429 |
| KRT8       | 12q13.13     | 0.021786 | 0.671232 | 0.76549  |
| DHX35      | 20q11.23-q12 | -0.02178 | 0.671333 | 0.765561 |
| SH3YL1     | 2p25.3       | -0.02177 | 0.671449 | 0.76565  |
| OR2T5      | 1q44         | -0.02175 | 0.671733 | 0.765915 |
| SMIM8      | 6q15         | -0.02175 | 0.671758 | 0.765915 |
| FHIT       | 3p14.2       | -0.02173 | 0.672015 | 0.766165 |
| GBP3       | 1p22.2       | 0.021727 | 0.672067 | 0.76618  |
| MYT1L-AS1  | 2p25.3       | -0.02171 | 0.672256 | 0.766294 |
| ZXDA       | Xp11.21      | -0.02171 | 0.672279 | 0.766294 |
| USP12      | 13q12.13     | -0.02171 | 0.672282 | 0.766294 |
| RAB17      | 2q37.3       | -0.0217  | 0.672386 | 0.766369 |

|           |              |          |          |          |
|-----------|--------------|----------|----------|----------|
| CTNND1    | 11q12.1      | -0.02169 | 0.672649 | 0.766625 |
| CHRND     | 2q37.1       | -0.02167 | 0.67294  | 0.766914 |
| CGREF1    | 2p23.3       | 0.021663 | 0.672983 | 0.766918 |
| NDUFB8    | 10q24.31     | 0.021658 | 0.67305  | 0.766952 |
| GSDMA     | 17q21.1      | -0.02165 | 0.673215 | 0.766993 |
| KRT75     | 12q13.13     | 0.021646 | 0.673218 | 0.766993 |
| FGF6      | 12p13.32     | -0.02164 | 0.673239 | 0.766993 |
| FAM189A1  | 15q13.1      | -0.02164 | 0.673272 | 0.766993 |
| ZBED3-AS1 | 5q13.3       | 0.021642 | 0.673281 | 0.766993 |
| AOX2P     | 2q33.1       | 0.021639 | 0.67332  | 0.766993 |
| USP32P2   | 17p11.2      | -0.02164 | 0.673376 | 0.766993 |
| C17ORF64  | 17q23.2      | 0.021634 | 0.673393 | 0.766993 |
| NYAP1     | 7q22.1       | 0.02162  | 0.673587 | 0.767152 |
| ABCD4     | 14q24.3      | -0.02162 | 0.673609 | 0.767152 |
| BCAP31    | Xq28         | -0.02161 | 0.673687 | 0.767197 |
| NEMP2     | 2q32.2       | -0.02161 | 0.67378  | 0.767233 |
| LY6E-DT   | 8q24.3       | 0.021606 | 0.673795 | 0.767233 |
| ATP4B     | 13q34        | 0.021594 | 0.673968 | 0.767386 |
| TRNAU1AP  | 1p35.3       | -0.02159 | 0.674018 | 0.767399 |
| GPX5      | 6p22.1       | -0.02158 | 0.674124 | 0.767466 |
| SLC5A1    | 22q12.3      | -0.02158 | 0.674153 | 0.767466 |
| DPPA3     | 12p13.31     | -0.02158 | 0.674195 | 0.76747  |
| FLJ34503  | 6q21         | 0.02157  | 0.6743   | 0.767546 |
| DNAJC21   | 5p13.2       | -0.02154 | 0.674793 | 0.768064 |
| CCDC12    | 3p21.31      | -0.0215  | 0.675247 | 0.768519 |
| UBE2U     | 1p31.3       | 0.021502 | 0.67527  | 0.768519 |
| ASPDH     | 19q13.33     | 0.021494 | 0.675389 | 0.768611 |
| ADIG      | 20q11.23     | 0.021488 | 0.675465 | 0.768653 |
| SERAC1    | 6q25.3       | 0.021484 | 0.675526 | 0.768662 |
| KRT73     | 12q13.13     | 0.021483 | 0.675549 | 0.768662 |
| CPT2      | 1p32.3       | -0.02148 | 0.675627 | 0.768671 |
| ZMYM2     | 13q12.11     | 0.021477 | 0.675633 | 0.768671 |
| NPBWR2    | 20q13.33     | -0.02147 | 0.675677 | 0.768677 |
| CSNK2A3   | 11p15.4      | -0.02147 | 0.675768 | 0.768737 |
| COX8C     | 14q32.12     | 0.02146  | 0.675863 | 0.768787 |
| DDC       | 7p12.2-p12.1 | 0.021456 | 0.675925 | 0.768787 |
| STK4      | 20q13.12     | 0.021453 | 0.675977 | 0.768787 |
| ABHD14B   | 3p21.2       | 0.021451 | 0.675992 | 0.768787 |
| SNORA38   | 6p21.33      | -0.02145 | 0.676004 | 0.768787 |
| FLII      | 17p11.2      | -0.02144 | 0.6761   | 0.768808 |
| ZNF7      | 8q24.3       | 0.021444 | 0.6761   | 0.768808 |
| DNAJC1    | 10p12.31     | 0.021428 | 0.676323 | 0.769014 |
| RC3H2     | 9q33.2       | -0.02143 | 0.676357 | 0.769014 |
| BATF      | 14q24.3      | -0.02142 | 0.676449 | 0.769075 |
| METAP1    | 4q23         | -0.02141 | 0.676624 | 0.76923  |
| OR7D2     | 19p13.2      | -0.0214  | 0.676735 | 0.769273 |
| OR6X1     | 11q24.1      | -0.0214  | 0.676739 | 0.769273 |
| OMA1      | 1p32.2-p32.1 | -0.02139 | 0.676864 | 0.769326 |
| DKK4      | 8p11.21      | -0.02139 | 0.676866 | 0.769326 |
| OR1N2     | 9q33.2       | 0.021388 | 0.676901 | 0.769326 |
| IL24      | 1q32.1       | 0.021379 | 0.677031 | 0.769383 |
| FGF22     | 19p13.3      | -0.02138 | 0.677061 | 0.769383 |
| POLR2J    | 7q22.1       | -0.02138 | 0.677066 | 0.769383 |
| TREML5P   | 6p21.1       | -0.02136 | 0.677269 | 0.76957  |
| PATE1     | 11q24.2      | -0.02135 | 0.677464 | 0.769748 |
| OCM       | 7p22.1       | -0.02133 | 0.67773  | 0.770006 |
| LINC00239 | 14q32.31     | -0.02132 | 0.677815 | 0.770026 |
| SEN2      | 3q27.2       | -0.02132 | 0.677824 | 0.770026 |

|            |          |          |          |          |
|------------|----------|----------|----------|----------|
| RNF5       | 6p21.32  | -0.02132 | 0.677892 | 0.770059 |
| UTP14C     | 13q14.3  | -0.02131 | 0.678005 | 0.770144 |
| GNLY       | 2p11.2   | -0.0213  | 0.678199 | 0.77032  |
| ATP6V1A    | 3q13.31  | -0.02127 | 0.678604 | 0.770712 |
| CHCHD6     | 3q21.3   | 0.021266 | 0.678635 | 0.770712 |
| GRIN3A     | 9q31.1   | -0.02126 | 0.678697 | 0.770712 |
| CARD18     | 11q22.3  | -0.02126 | 0.678697 | 0.770712 |
| PDCL3P4    | 3q12.3   | 0.021257 | 0.678761 | 0.77074  |
| CBR1       | 21q22.12 | -0.02125 | 0.678816 | 0.770759 |
| ZKSCAN3    | 6p22.1   | 0.021239 | 0.679028 | 0.770956 |
| KRTAP5-5   | 11p15.5  | -0.02121 | 0.679451 | 0.771353 |
| LINC00620  | 3p25.1   | -0.02121 | 0.679455 | 0.771353 |
| LINC00999  | 10p11.1  | 0.021203 | 0.679531 | 0.771396 |
| WDR66      | 12q24.31 | -0.0212  | 0.679575 | 0.771403 |
| CPSF2      | 14q32.12 | 0.021191 | 0.679711 | 0.771512 |
| ZNF665     | 19q13.42 | -0.02118 | 0.679831 | 0.771605 |
| APOBEC1    | 12p13.31 | -0.02117 | 0.679997 | 0.77174  |
| APPL1      | 3p14.3   | 0.021168 | 0.680033 | 0.77174  |
| ACSL1      | 4q35.1   | -0.02116 | 0.680086 | 0.77174  |
| KDM5D      | Yq11.223 | 0.021163 | 0.680104 | 0.77174  |
| ACTB       | 7p22.1   | 0.021155 | 0.680221 | 0.771829 |
| PRKCD      | 3p21.1   | -0.02115 | 0.680273 | 0.771829 |
| GPAT4      | 8p11.21  | -0.02115 | 0.680298 | 0.771829 |
| RPAIN      | 17p13.2  | -0.02115 | 0.680353 | 0.771848 |
| OR8H1      | 11q12.1  | 0.021139 | 0.680454 | 0.771919 |
| IFNA21     | 9p21.3   | 0.021131 | 0.680557 | 0.771992 |
| IL17D      | 13q12.11 | 0.021116 | 0.680781 | 0.772153 |
| GMIP       | 19p13.11 | 0.021111 | 0.680845 | 0.772153 |
| ATF4       | 22q13.1  | -0.02111 | 0.680861 | 0.772153 |
| TARS       | 5p13.3   | 0.021109 | 0.680873 | 0.772153 |
| GMNC       | 3q28     | -0.02111 | 0.680892 | 0.772153 |
| CCDC9B     | 15q15.1  | 0.021097 | 0.681054 | 0.772294 |
| PAK2       | 3q29     | -0.02108 | 0.681245 | 0.772466 |
| FOXI3      | 2p11.2   | -0.02107 | 0.68145  | 0.772654 |
| ADH7       | 4q23     | 0.021062 | 0.681545 | 0.772718 |
| MVB12A     | 19p13.11 | -0.02104 | 0.681845 | 0.773015 |
| SPATA2L    | 16q24.3  | -0.02104 | 0.681919 | 0.773055 |
| NUP54      | 4q21.1   | 0.021033 | 0.681962 | 0.77306  |
| LIM2       | 19q13.41 | -0.02102 | 0.682172 | 0.773254 |
| EGLN1      | 1q42.2   | 0.021006 | 0.68235  | 0.773374 |
| PYDC2      | 3q28     | -0.02101 | 0.682355 | 0.773374 |
| MAGEC3     | Xq27.2   | 0.02099  | 0.682585 | 0.77356  |
| SENP3      | 17p13.1  | 0.020989 | 0.682596 | 0.77356  |
| PSG9       | 19q13.31 | -0.02097 | 0.682815 | 0.773764 |
| PRR15L     | 17q21.32 | -0.02096 | 0.683015 | 0.773947 |
| ARFGAP2    | 11p11.2  | -0.02094 | 0.683292 | 0.774217 |
| FOXD1      | 5q13.2   | 0.020929 | 0.683451 | 0.77435  |
| DDIT3      | 12q13.3  | 0.020927 | 0.683486 | 0.77435  |
| FAAP20     | 1p36.33  | 0.020911 | 0.683714 | 0.774564 |
| PIP4K2C    | 12q13.3  | -0.02089 | 0.68401  | 0.774855 |
| OR6N1      | 1q23.1   | -0.02088 | 0.684126 | 0.774943 |
| MFSD4A-AS1 | 1q32.1   | -0.02087 | 0.684364 | 0.775129 |
| LPIN2      | 18p11.31 | -0.02087 | 0.684367 | 0.775129 |
| FFAR1      | 19q13.12 | 0.020848 | 0.684617 | 0.775368 |
| PRSS55     | 8p23.1   | -0.02084 | 0.684677 | 0.775369 |
| POTEE      | 2q21.1   | -0.02084 | 0.684702 | 0.775369 |
| RNF19B     | 1p35.1   | -0.02084 | 0.684734 | 0.775369 |
| GPALPP1    | 13q14.12 | -0.02083 | 0.684934 | 0.775511 |



|              |                 |          |          |          |
|--------------|-----------------|----------|----------|----------|
| ZNF618       | 9q32            | 0.020825 | 0.684938 | 0.775511 |
| ZNF30        | 19q13.11        | -0.02082 | 0.685049 | 0.775593 |
| SLC9A6       | Xq26.3          | 0.02081  | 0.685159 | 0.775675 |
| JMJD6        | 17q25.1         | -0.02079 | 0.685459 | 0.77597  |
| FBXO31       | 16q24.2         | -0.02078 | 0.685656 | 0.776149 |
| C9ORF78      | 9q34.11         | -0.02075 | 0.68598  | 0.776442 |
| ANKDD1A      | 15q22.31        | -0.02075 | 0.685992 | 0.776442 |
| MRPS18B      | 6p21.33         | -0.02073 | 0.686291 | 0.776737 |
| MGST1        | 12p12.3         | 0.02072  | 0.686446 | 0.776867 |
| SP9          | 2q31.1          | 0.020705 | 0.686665 | 0.777072 |
| PTPRG        | 3p14.2          | 0.020699 | 0.686746 | 0.77712  |
| HIST1H2AD    | 6p22.2          | 0.020679 | 0.687036 | 0.777404 |
| SLC66A2      | 18q23           | 0.020676 | 0.687075 | 0.777404 |
| CETN1        | 18p11.32        | -0.02067 | 0.687136 | 0.77743  |
| GNAS-AS1     | 20q13.32        | -0.02065 | 0.687453 | 0.777744 |
| SEC23IP      | 10q26.11-q26.12 | 0.020643 | 0.687554 | 0.777814 |
| UBTFL1       | 11q14.3         | -0.02064 | 0.687658 | 0.77787  |
| ATP13A5      | 3q29            | 0.020634 | 0.687681 | 0.77787  |
| PLA2G12A     | 4q25            | -0.02063 | 0.687742 | 0.777895 |
| LINC00661    | 19p13.12        | -0.02062 | 0.687917 | 0.778049 |
| HEXIM1       | 17q21.31        | 0.02061  | 0.688023 | 0.778112 |
| TSTD1        | 1q23.3          | -0.02061 | 0.688051 | 0.778112 |
| SPDYE4       | 17p13.1         | 0.020569 | 0.688609 | 0.778699 |
| PPP1R7       | 2q37.3          | -0.02056 | 0.688693 | 0.778751 |
| DBH          | 9q34.2          | -0.02054 | 0.68909  | 0.779111 |
| NOL11        | 17q24.2         | 0.020534 | 0.68911  | 0.779111 |
| HERC4        | 10q21.3         | 0.020533 | 0.689129 | 0.779111 |
| LOC100130449 | 2q37.3          | -0.02052 | 0.689313 | 0.779276 |
| IRX5         | 16q12.2         | -0.0205  | 0.689574 | 0.779527 |
| SNX25        | 4q35.1          | -0.02048 | 0.689833 | 0.779767 |
| ZNF827       | 4q31.21-q31.22  | -0.02048 | 0.689864 | 0.779767 |
| NUDCD2       | 5q34            | -0.02048 | 0.68992  | 0.779786 |
| SLMAP        | 3p14.3          | -0.02047 | 0.689982 | 0.779812 |
| TMPRSS15     | 21q21.1         | -0.02046 | 0.690221 | 0.780038 |
| NLGN4Y       | Yq11.221        | -0.02045 | 0.690277 | 0.780057 |
| CELF5        | 19p13.3         | 0.020442 | 0.690428 | 0.780184 |
| ARMH3        | 10q24.32        | -0.02043 | 0.690569 | 0.780299 |
| FAM222A-AS1  | 12q24.11        | 0.020429 | 0.690626 | 0.780316 |
| RTL8A        | Xq26.3          | -0.02043 | 0.690662 | 0.780316 |
| FOXD4L5      | 9q21.11         | 0.020404 | 0.690977 | 0.780628 |
| PTPMT1       | 11p11.2         | -0.02039 | 0.691243 | 0.780885 |
| BLCAP        | 20q11.23        | 0.020379 | 0.691336 | 0.780946 |
| SLC34A2      | 4p15.2          | -0.02036 | 0.691544 | 0.781137 |
| LINC01845    | 5q33.3          | 0.020359 | 0.691619 | 0.781177 |
| ASCL3        | 11p15.4         | 0.020352 | 0.691726 | 0.781254 |
| NAPA         | 19q13.32-q13.33 | -0.02035 | 0.691816 | 0.781306 |
| IL4R         | 16p12.1         | 0.020343 | 0.69185  | 0.781306 |
| OR5M10       | 11q12.1         | -0.02033 | 0.691995 | 0.781425 |
| GAS2L1P2     | 9q22.33         | -0.02033 | 0.692084 | 0.781482 |
| KLF11        | 2p25.1          | 0.020324 | 0.692134 | 0.781495 |
| ADAMTS15     | 11q24.3         | 0.020293 | 0.692574 | 0.781948 |
| C4ORF36      | 4q21.3          | -0.02025 | 0.693134 | 0.782526 |
| HLA-H        | 6p22.1          | -0.02025 | 0.693165 | 0.782526 |
| GSTM1        | 1p13.3          | 0.020246 | 0.693245 | 0.782572 |
| MORC2-AS1    | 22q12.2         | -0.02024 | 0.693286 | 0.782575 |
| DEDD2        | 19q13.2         | 0.020216 | 0.693682 | 0.782978 |
| OR5K4        | 3q11.2          | -0.02021 | 0.693775 | 0.782995 |
| GP1BA        | 17p13.2         | -0.02021 | 0.693775 | 0.782995 |

|               |             |          |          |          |
|---------------|-------------|----------|----------|----------|
| GLYATL2       | 11q12.1     | 0.020186 | 0.694111 | 0.783329 |
| DKFZP58611420 | 7p14.3      | -0.02018 | 0.69424  | 0.783431 |
| ESYT3         | 3q22.3      | 0.02017  | 0.694338 | 0.783497 |
| SLC38A7       | 16q21       | -0.02016 | 0.694463 | 0.783514 |
| PPP1R32       | 11q12.2     | -0.02016 | 0.694465 | 0.783514 |
| DELE1         | 5q31.3      | -0.02016 | 0.694485 | 0.783514 |
| GFOD2         | 16q22.1     | -0.02016 | 0.69451  | 0.783514 |
| ZNF496        | 1q44        | 0.020151 | 0.694615 | 0.783571 |
| PPT2          | 6p21.32     | 0.020148 | 0.694665 | 0.783571 |
| ATG3          | 3q13.2      | 0.020147 | 0.694677 | 0.783571 |
| LIPF          | 10q23.31    | -0.02014 | 0.694738 | 0.783595 |
| GTF2A2        | 15q22.2     | -0.02011 | 0.695244 | 0.784107 |
| S100A13       | 1q21.3      | -0.0201  | 0.695287 | 0.784107 |
| LINC00305     | 18q22.1     | -0.0201  | 0.695309 | 0.784107 |
| TBC1D16       | 17q25.3     | -0.0201  | 0.695418 | 0.784151 |
| PRAC2         | 17q21.32    | -0.02009 | 0.695427 | 0.784151 |
| IKZF3         | 17q12-q21.1 | -0.02007 | 0.695855 | 0.78459  |
| ZNF346        | 5q35.2      | -0.02006 | 0.695923 | 0.784623 |
| CORO6         | 17q11.2     | 0.020054 | 0.696019 | 0.784686 |
| SCGB2B2       | 19q13.11    | -0.02005 | 0.696098 | 0.784706 |
| TSPAN16       | 19p13.2     | 0.020043 | 0.69617  | 0.784706 |
| PRODH2        | 19q13.12    | 0.020042 | 0.69619  | 0.784706 |
| BANF2         | 20p12.1     | 0.020042 | 0.696193 | 0.784706 |
| IRS4          | Xq22.3      | -0.02003 | 0.696296 | 0.784777 |
| OR5AR1        | 11q12.1     | -0.02002 | 0.696564 | 0.785036 |
| EIF4EBP2      | 10q22.1     | 0.019998 | 0.696826 | 0.785287 |
| AUTS2         | 7q11.22     | 0.019994 | 0.696885 | 0.785309 |
| LOC643923     | 11q22.3     | -0.01998 | 0.697124 | 0.785535 |
| XRRA1         | 11q13.4     | -0.01996 | 0.697403 | 0.785804 |
| TMEM89        | 3p21.31     | 0.019949 | 0.697526 | 0.785899 |
| DUOXA1        | 15q21.1     | 0.019933 | 0.697752 | 0.78611  |
| GLG1          | 16q23.1     | -0.0199  | 0.698182 | 0.786549 |
| OR2M4         | 1q44        | 0.019857 | 0.698852 | 0.78726  |
| PDIA3         | 15q15.3     | -0.01985 | 0.698977 | 0.787356 |
| SAT1          | Xp22.11     | -0.01984 | 0.699048 | 0.787393 |
| DRD3          | 3q13.31     | -0.0198  | 0.699662 | 0.788023 |
| RNF227        | 17p13.1     | -0.0198  | 0.699695 | 0.788023 |
| PDE4C         | 19p13.11    | 0.019797 | 0.699726 | 0.788023 |
| INIP          | 9q32        | 0.019785 | 0.69989  | 0.788164 |
| DNAH8         | 6p21.2      | -0.01978 | 0.699944 | 0.78818  |
| CHIA          | 1p13.2      | 0.019776 | 0.700029 | 0.788231 |
| RAB15         | 14q23.3     | 0.019757 | 0.700294 | 0.788486 |
| CSPG4         | 15q24.2     | -0.01975 | 0.700341 | 0.788494 |
| INPP5D        | 2q37.1      | -0.01975 | 0.700437 | 0.788508 |
| DSC3          | 18q12.1     | -0.01975 | 0.700459 | 0.788508 |
| OR6K6         | 1q23.1      | -0.01974 | 0.700472 | 0.788508 |
| CST13P        | 20p11.21    | -0.01973 | 0.700647 | 0.788661 |
| TCAF1         | 7q35        | -0.01972 | 0.700801 | 0.78879  |
| TMIGD1        | 17q11.2     | 0.019708 | 0.701008 | 0.788979 |
| ST7-AS2       | 7q31.2      | -0.01969 | 0.701215 | 0.789129 |
| CSNK1G1       | 15q22.31    | 0.019693 | 0.701221 | 0.789129 |
| PHF3          | 6q12        | 0.01969  | 0.701261 | 0.789131 |
| S100A12       | 1q21.3      | -0.01968 | 0.701478 | 0.78933  |
| DKFZP434H168  | 16q13       | -0.01967 | 0.701558 | 0.789376 |
| MSX2P1        | 17q22       | -0.01966 | 0.701642 | 0.789426 |
| NOP14-AS1     | 4p16.3      | 0.019658 | 0.701721 | 0.789471 |
| LINC01816     | 2p13.3      | -0.01963 | 0.702082 | 0.789798 |
| SEMG2         | 20q13.12    | 0.019633 | 0.702091 | 0.789798 |

|           |            |          |          |          |
|-----------|------------|----------|----------|----------|
| CCDC22    | Xp11.23    | 0.01962  | 0.702281 | 0.789968 |
| TTI2      | 8p12       | -0.01962 | 0.702328 | 0.789976 |
| HES6      | 2q37.3     | -0.0196  | 0.702515 | 0.790142 |
| KIR2DS4   | 19q13.42   | -0.0196  | 0.702559 | 0.790147 |
| SPINK9    | 5q32       | -0.0196  | 0.702629 | 0.790182 |
| TEX12     | 11q23.1    | 0.019589 | 0.702727 | 0.790248 |
| PXYLP1    | 3q23       | 0.019561 | 0.703125 | 0.79065  |
| COLCA1    | 11q23.1    | 0.019533 | 0.703536 | 0.791043 |
| OR1B1     | 9q33.2     | -0.01953 | 0.703575 | 0.791043 |
| RPL10L    | 14q21.2    | -0.01953 | 0.703593 | 0.791043 |
| PRAME     | 22q11.22   | -0.01952 | 0.703742 | 0.791167 |
| ACER3     | 11q13.5    | -0.01951 | 0.703881 | 0.791279 |
| C9ORF153  | 9q21.33    | 0.019502 | 0.703988 | 0.791346 |
| SEC24A    | 5q31.1     | -0.0195  | 0.704028 | 0.791346 |
| ZSWIM6    | 5q12.1     | -0.01949 | 0.70409  | 0.791346 |
| RPSAP9    | 9q21.13    | 0.019494 | 0.704099 | 0.791346 |
| ATG9A     | 2q35       | -0.01949 | 0.704149 | 0.791346 |
| SYDE2     | 1p22.3     | -0.01949 | 0.704179 | 0.791346 |
| HLA-F-AS1 | 6p22.1     | 0.019477 | 0.704348 | 0.79145  |
| SMR3A     | 4q13.3     | 0.019477 | 0.70435  | 0.79145  |
| USP50     | 15q21.2    | -0.01947 | 0.704513 | 0.791589 |
| DNAAF4    | 15q21.3    | -0.01945 | 0.704794 | 0.79186  |
| FBXO6     | 1p36.22    | -0.01944 | 0.704875 | 0.791907 |
| TOP1P1    | 1q24.3     | 0.019437 | 0.704918 | 0.791911 |
| NOX1      | Xq22.1     | 0.019431 | 0.705006 | 0.791965 |
| GALNT2    | 1q42.13    | 0.019427 | 0.705071 | 0.791994 |
| GLS2      | 12q13.3    | -0.0194  | 0.705504 | 0.792402 |
| DDX27     | 20q13.13   | -0.01939 | 0.705535 | 0.792402 |
| TRIM43    | 2q11.1     | 0.019391 | 0.70559  | 0.792402 |
| FMR1NB    | Xq27.3-q28 | 0.019391 | 0.705593 | 0.792402 |
| LINC01144 | 1p34.1     | 0.019384 | 0.705694 | 0.792472 |
| LOC154449 | 6q27       | -0.01937 | 0.705891 | 0.792648 |
| BPIFA2    | 20q11.21   | -0.01936 | 0.706094 | 0.792832 |
| PPIG      | 2q31.1     | -0.01932 | 0.706552 | 0.793272 |
| STARD6    | 18q21.2    | 0.019324 | 0.706565 | 0.793272 |
| OR1N1     | 9q33.2     | -0.01931 | 0.706799 | 0.793451 |
| WASF1     | 6q21       | 0.019307 | 0.706804 | 0.793451 |
| C11ORF65  | 11q22.3    | -0.0193  | 0.706973 | 0.793596 |
| RNF6      | 13q12.13   | 0.019282 | 0.707166 | 0.793768 |
| HDAC8     | Xq13.1     | 0.019271 | 0.707325 | 0.793902 |
| DDIT4     | 10q22.1    | -0.01926 | 0.707456 | 0.794005 |
| ITGB1BP2  | Xq13.1     | 0.019252 | 0.707603 | 0.794098 |
| LYZL4     | 3p22.1     | 0.019251 | 0.707618 | 0.794098 |
| TMX2      | 11q12.1    | -0.01925 | 0.707665 | 0.794106 |
| OR6B1     | 7q35       | -0.01923 | 0.707917 | 0.794333 |
| PLA2G2E   | 1p36.13    | 0.019228 | 0.707946 | 0.794333 |
| IL26      | 12q15      | -0.01922 | 0.708095 | 0.794419 |
| FAM74A1   | 9p12       | 0.019217 | 0.708103 | 0.794419 |
| HS6ST2    | Xq26.2     | 0.019214 | 0.708152 | 0.79443  |
| CLTA      | 9p13.3     | 0.019201 | 0.708342 | 0.794599 |
| RIPK4     | 21q22.3    | -0.01919 | 0.708461 | 0.794671 |
| RING1     | 6p21.32    | -0.01919 | 0.708486 | 0.794671 |
| BEST2     | 19p13.13   | -0.01919 | 0.708547 | 0.794695 |
| RAP1GAP   | 1p36.12    | 0.019174 | 0.708732 | 0.794858 |
| RPL36     | 19p13.3    | 0.019164 | 0.708873 | 0.794971 |
| SLC2A13   | 12q12      | -0.01915 | 0.709104 | 0.795186 |
| SPG11     | 15q21.1    | 0.019138 | 0.709254 | 0.795309 |
| ATP1A1    | 1p13.1     | -0.01913 | 0.709316 | 0.795335 |

|             |          |          |          |          |
|-------------|----------|----------|----------|----------|
| NR1I2       | 3q13.33  | 0.019118 | 0.709541 | 0.79552  |
| KIR2DL1     | 19q13.42 | -0.01912 | 0.709561 | 0.79552  |
| DMRTC1      | Xq13.1   | -0.01911 | 0.709711 | 0.795644 |
| PYY         | 17q21.31 | -0.0191  | 0.709767 | 0.795662 |
| OR5B2       | 11q12.1  | 0.019097 | 0.709854 | 0.795715 |
| MYH1        | 17p13.1  | -0.01909 | 0.709896 | 0.795717 |
| IFT74       | 9p21.2   | -0.01909 | 0.71     | 0.79579  |
| CCDC81      | 11q14.2  | 0.019081 | 0.710075 | 0.795829 |
| DCAF7       | 17q23.3  | -0.01907 | 0.710241 | 0.795968 |
| SDF4        | 1p36.33  | 0.019067 | 0.710278 | 0.795968 |
| GNRH2       | 20p13    | 0.019044 | 0.710615 | 0.796247 |
| GANAB       | 11q12.3  | 0.019042 | 0.710647 | 0.796247 |
| LAMC3       | 9q34.12  | -0.01904 | 0.710647 | 0.796247 |
| GPR22       | 7q22.3   | -0.01903 | 0.710861 | 0.796442 |
| EIF4ENIF1   | 22q12.2  | 0.019013 | 0.711075 | 0.796638 |
| TRIM47      | 17q25.1  | 0.018985 | 0.711472 | 0.797038 |
| USP6        | 17p13.2  | 0.018978 | 0.71157  | 0.797103 |
| TCHH        | 1q21.3   | -0.01897 | 0.711742 | 0.797238 |
| ZNF438      | 10p11.23 | -0.01896 | 0.71177  | 0.797238 |
| C2ORF50     | 2p25.1   | -0.01892 | 0.712381 | 0.797812 |
| KDM7A       | 7q34     | -0.01892 | 0.712385 | 0.797812 |
| DCLK3       | 3p22.2   | -0.01892 | 0.712402 | 0.797812 |
| PPAN-P2RY11 | 19p13.2  | -0.01892 | 0.712463 | 0.797836 |
| RPL27       | 17q21.31 | -0.0189  | 0.712763 | 0.798127 |
| KIAA0319L   | 1p34.3   | -0.01889 | 0.712885 | 0.798219 |
| DUPD1       | 10q22.2  | -0.01887 | 0.713192 | 0.798519 |
| GNAT2       | 1p13.3   | 0.018858 | 0.71332  | 0.798617 |
| CMC1        | 3p24.1   | 0.018842 | 0.713548 | 0.798828 |
| ANKRD26P1   | 16q11.2  | -0.01883 | 0.713747 | 0.798979 |
| TRPV6       | 7q34     | 0.018825 | 0.713796 | 0.798979 |
| NAA60       | 16p13.3  | -0.01882 | 0.713855 | 0.798979 |
| MPHOSPH6    | 16q23.3  | -0.01882 | 0.713883 | 0.798979 |
| EREG        | 4q13.3   | -0.01882 | 0.713883 | 0.798979 |
| RTCA        | 1p21.2   | -0.0188  | 0.714097 | 0.799175 |
| HIPK2       | 7q34     | 0.01877  | 0.7146   | 0.799692 |
| LOC391343   | 2p25.3   | 0.018755 | 0.714817 | 0.799805 |
| CUTALP      | 9q33.2   | 0.018754 | 0.714831 | 0.799805 |
| APOA5       | 11q23.3  | -0.01875 | 0.714836 | 0.799805 |
| SPACA1      | 6q15     | -0.01875 | 0.714861 | 0.799805 |
| INTS12      | 4q24     | -0.01874 | 0.714966 | 0.799834 |
| TMEM205     | 19p13.2  | -0.01874 | 0.714966 | 0.799834 |
| ZBED5       | 11p15.4  | -0.01873 | 0.715156 | 0.800001 |
| C10ORF120   | 10q26.13 | 0.01872  | 0.715326 | 0.800147 |
| KCTD1       | 18q11.2  | 0.018714 | 0.715417 | 0.800204 |
| HOMEZ       | 14q11.2  | -0.01871 | 0.715495 | 0.800247 |
| SNORA80E    | 1q22     | 0.018689 | 0.715774 | 0.800514 |
| MTERF3      | 8q22.1   | -0.01869 | 0.715827 | 0.800529 |
| ZNF823      | 19p13.2  | 0.018662 | 0.716166 | 0.800863 |
| OSM         | 22q12.2  | -0.01864 | 0.716441 | 0.801089 |
| OVOL1       | 11q13.1  | 0.018643 | 0.716448 | 0.801089 |
| HDC         | 15q21.2  | -0.01862 | 0.716721 | 0.80135  |
| CYP2A7      | 19q13.2  | -0.01861 | 0.716863 | 0.801463 |
| GRM4        | 6p21.31  | -0.01861 | 0.716921 | 0.801484 |
| KISS1       | 1q32.1   | 0.018562 | 0.717624 | 0.802224 |
| RPTOR       | 17q25.3  | -0.01855 | 0.717855 | 0.802438 |
| INPP5B      | 1p34.3   | -0.01854 | 0.717971 | 0.802523 |
| ANKFY1      | 17p13.2  | 0.018523 | 0.718187 | 0.802693 |
| DHRS7B      | 17p11.2  | -0.01852 | 0.718241 | 0.802693 |

|              |                   |          |          |          |
|--------------|-------------------|----------|----------|----------|
| SLC22A12     | 11q13.1           | -0.01852 | 0.718243 | 0.802693 |
| GPHA2        | 11q13.1           | -0.01851 | 0.718343 | 0.802759 |
| PLXNB3       | Xq28              | -0.0185  | 0.718457 | 0.802842 |
| PLXND1       | 3q22.1            | -0.01849 | 0.718677 | 0.803043 |
| SPIRE1       | 18p11.21          | -0.01848 | 0.718755 | 0.803086 |
| PTPRO        | 12p12.3 12p13-p12 | -0.01847 | 0.718899 | 0.803202 |
| ATOH1        | 4q22.2            | 0.01847  | 0.71896  | 0.803225 |
| LYZL6        | 17q12             | 0.018457 | 0.719152 | 0.803333 |
| GGACT        | 13q32.3           | -0.01846 | 0.719172 | 0.803333 |
| MAP3K19      | 2q21.3            | 0.018456 | 0.719177 | 0.803333 |
| B9D1         | 17p11.2           | 0.018451 | 0.719248 | 0.803367 |
| CHAD         | 17q21.33          | 0.018445 | 0.719326 | 0.80341  |
| CST9         | 20p11.21          | -0.01842 | 0.719754 | 0.803843 |
| TRNT1        | 3p26.2            | 0.018407 | 0.719885 | 0.803944 |
| ALKBH2       | 12q24.11          | -0.0184  | 0.719969 | 0.803956 |
| ADAM8        | 10q26.3           | -0.0184  | 0.719976 | 0.803956 |
| FAM45A       | 10q26.11          | 0.018398 | 0.720023 | 0.803964 |
| IQCF6        | 3p21.2            | 0.018379 | 0.72029  | 0.804217 |
| PCBP4        | 3p21.2            | -0.01837 | 0.720421 | 0.8043   |
| C12ORF77     | 12p12.1           | -0.01837 | 0.720444 | 0.8043   |
| MMD2         | 7p22.1            | -0.01836 | 0.720529 | 0.804318 |
| PLS1         | 3q23              | 0.018362 | 0.720541 | 0.804318 |
| UBE2V1       | 20q13.13          | -0.01835 | 0.720757 | 0.804515 |
| SYNE4        | 19q13.12          | -0.01833 | 0.72096  | 0.804696 |
| ACAP1        | 17p13.1           | -0.01832 | 0.721147 | 0.80486  |
| UCA1         | 19p13.12          | -0.01831 | 0.721304 | 0.804963 |
| TAF2         | 8q24.12           | -0.01831 | 0.721319 | 0.804963 |
| BCAR4        | 16p13.13          | 0.018297 | 0.721483 | 0.805018 |
| LOC100129055 | 10p11.1           | 0.018297 | 0.721483 | 0.805018 |
| NFKB1        | 4q24              | -0.0183  | 0.721489 | 0.805018 |
| CYFIP1       | 15q11.2           | 0.018292 | 0.721564 | 0.805057 |
| EP300        | 22q13.2           | 0.018286 | 0.721649 | 0.805107 |
| SFT2D1       | 6q27              | 0.018275 | 0.721816 | 0.805248 |
| TEKT4        | 2q11.1            | -0.01825 | 0.722244 | 0.80568  |
| EGLN2        | 19q13.2           | 0.018243 | 0.722284 | 0.80568  |
| SNORA66      | 1p22.1            | 0.018232 | 0.722439 | 0.805763 |
| EPHB2        | 1p36.12           | 0.01823  | 0.722469 | 0.805763 |
| FAM126B      | 2q33.1            | -0.01823 | 0.722479 | 0.805763 |
| MAD2L2       | 1p36.22           | -0.01822 | 0.72257  | 0.805819 |
| ZNF74        | 22q11.21          | -0.01821 | 0.722708 | 0.805922 |
| NYX          | Xp11.4            | -0.01821 | 0.722742 | 0.805922 |
| C17ORF98     | 17q12             | 0.018192 | 0.72302  | 0.806162 |
| CITED4       | 1p34.2 1p35-p34   | 0.018191 | 0.723038 | 0.806162 |
| SNUPN        | 15q24.2           | -0.01818 | 0.723148 | 0.806209 |
| ZNF343       | 20p13             | 0.018182 | 0.723161 | 0.806209 |
| PRDM9        | 5p14.2            | 0.018174 | 0.723282 | 0.806243 |
| ASB13        | 10p15.1           | 0.018173 | 0.723299 | 0.806243 |
| ZKSCAN8      | 6p22.1            | 0.018172 | 0.723312 | 0.806243 |
| UBA2         | 19q13.11          | 0.018165 | 0.723422 | 0.80632  |
| GRK5         | 10q26.11          | -0.01816 | 0.723544 | 0.806412 |
| NDUFB11      | Xp11.3            | 0.018145 | 0.723701 | 0.806529 |
| HDHD5-AS1    | 22q11.1           | 0.018144 | 0.72373  | 0.806529 |
| TMPRSS11A    | 4q13.2            | -0.01813 | 0.723978 | 0.806748 |
| VSNL1        | 2p24.2            | 0.018123 | 0.724028 | 0.806748 |
| PECR         | 2q35              | 0.018122 | 0.724047 | 0.806748 |
| RFXANK       | 19p13.11          | -0.01811 | 0.724157 | 0.806826 |
| CCDC113      | 16q21             | 0.018096 | 0.724428 | 0.807074 |
| CAPZA3       | 12p12.3           | -0.01809 | 0.72446  | 0.807074 |

|            |                 |          |          |          |
|------------|-----------------|----------|----------|----------|
| FAM209B    | 20q13.31        | -0.01809 | 0.72455  | 0.807129 |
| TMEM168    | 7q31.1          | -0.01807 | 0.724758 | 0.807308 |
| PZP        | 12p13.31        | -0.01807 | 0.724791 | 0.807308 |
| UBE2NL     | Xq27.3          | -0.01806 | 0.72495  | 0.80744  |
| GFRA4      | 20p13           | -0.01806 | 0.725008 | 0.80746  |
| SLC9C1     | 3q13.2          | 0.018019 | 0.725556 | 0.808025 |
| OXA1L      | 14q11.2         | 0.018004 | 0.725762 | 0.808175 |
| TAS2R7     | 12p13.2         | -0.018   | 0.725772 | 0.808175 |
| ALG2       | 9q22.33         | -0.018   | 0.725859 | 0.808228 |
| NIPAL1     | 4p12            | -0.01798 | 0.726067 | 0.808414 |
| MLNR       | 13q14.2         | 0.017978 | 0.726146 | 0.808458 |
| C9ORF64    | 9q21.32         | -0.01795 | 0.726502 | 0.808808 |
| DEUP1      | 11q21           | -0.01795 | 0.726564 | 0.808833 |
| OR1L4      | 9q33.2          | 0.01794  | 0.726709 | 0.808949 |
| P2RY1      | 3q25.2          | 0.017935 | 0.726783 | 0.808987 |
| ADAM11     | 17q21.31        | 0.017908 | 0.72717  | 0.809372 |
| MBD3L1     | 19p13.2         | 0.017887 | 0.727486 | 0.809589 |
| KRTAP19-8  | 21q22.11        | 0.017887 | 0.727486 | 0.809589 |
| TEX47      | 7q21.13         | 0.017887 | 0.727486 | 0.809589 |
| PIAS1      | 15q23           | 0.017844 | 0.728111 | 0.810239 |
| PRM1       | 16p13.13        | -0.01782 | 0.728401 | 0.810517 |
| BLMH       | 17q11.2         | 0.017806 | 0.728666 | 0.810749 |
| TRDMT1     | 10p13           | -0.0178  | 0.728691 | 0.810749 |
| C1QL2      | 2q14.2          | 0.017793 | 0.728851 | 0.810883 |
| TSPEAR-AS2 | 21q22.3         | -0.01778 | 0.72901  | 0.810986 |
| CPS1-IT1   | 2q34            | -0.01778 | 0.729025 | 0.810986 |
| MINAR1     | 15q25.1         | 0.017764 | 0.729277 | 0.811221 |
| GTF2F2     | 13q14.12-q14.13 | 0.017757 | 0.729384 | 0.811296 |
| LINC01124  | 2q31.1          | -0.01775 | 0.729431 | 0.811303 |
| ZNF217     | 20q13.2         | 0.017742 | 0.729605 | 0.811451 |
| FAM138F    | 19p13.3         | -0.01773 | 0.729709 | 0.811522 |
| C2ORF73    | 2p16.2          | -0.01772 | 0.729883 | 0.811646 |
| COLQ       | 3p25.1          | -0.01772 | 0.729912 | 0.811646 |
| MTIF2      | 2p16.1          | 0.017718 | 0.729958 | 0.811646 |
| KLF3-AS1   | 4p14            | 0.017716 | 0.729983 | 0.811646 |
| USH1C      | 11p15.1         | -0.01771 | 0.730122 | 0.811725 |
| PPL        | 16p13.3         | -0.01771 | 0.730135 | 0.811725 |
| VNN3       | 6q23.2          | 0.017698 | 0.730253 | 0.811811 |
| STAP2      | 19p13.3         | -0.01768 | 0.730456 | 0.811983 |
| TRPC5      | Xq23            | 0.017681 | 0.730489 | 0.811983 |
| GORAB      | 1q24.2          | 0.017677 | 0.730548 | 0.812004 |
| POLR1D     | 13q12.2         | -0.01767 | 0.730589 | 0.812004 |
| ANXA2      | 15q22.2         | -0.01767 | 0.730646 | 0.812022 |
| FABP12     | 8q21.13         | 0.017659 | 0.730816 | 0.812166 |
| SCD        | 10q24.31        | 0.017654 | 0.730892 | 0.812205 |
| TMC7       | 16p12.3         | -0.01765 | 0.730961 | 0.812237 |
| EPOR       | 19p13.2         | -0.01765 | 0.731016 | 0.812254 |
| NDUFA13    | 19p13.11        | -0.01764 | 0.731116 | 0.812319 |
| ADAM3A     | 8p11.22         | -0.01763 | 0.731299 | 0.812362 |
| SLC25A36   | 3q23            | 0.017626 | 0.731306 | 0.812362 |
| ZNF620     | 3p22.1          | 0.017626 | 0.731308 | 0.812362 |
| PLCZ1      | 12p12.3         | -0.01762 | 0.731316 | 0.812362 |
| NFIA       | 1p31.3          | 0.017612 | 0.731504 | 0.812525 |
| TSHB       | 1p13.2          | 0.017607 | 0.731577 | 0.812526 |
| MYO1C      | 17p13.3         | -0.01761 | 0.731586 | 0.812526 |
| RCL1       | 9p24.1          | 0.017598 | 0.731706 | 0.812614 |
| VN1R10P    | 6p22.1          | 0.017579 | 0.731996 | 0.812874 |
| SLC6A13    | 12p13.33        | 0.017577 | 0.732021 | 0.812874 |

|             |          |          |          |          |
|-------------|----------|----------|----------|----------|
| MAL2        | 8q24.12  | -0.01757 | 0.732189 | 0.812964 |
| POMZP3      | 7q11.23  | -0.01756 | 0.732214 | 0.812964 |
| TTC9        | 14q24.2  | -0.01756 | 0.732223 | 0.812964 |
| TRPV3       | 17p13.2  | -0.01755 | 0.732343 | 0.813051 |
| LOC284788   | 20p11.21 | 0.017534 | 0.732649 | 0.813346 |
| GATC        | 12q24.31 | 0.017527 | 0.732746 | 0.813408 |
| IQCF2       | 3p21.2   | -0.01752 | 0.732885 | 0.813518 |
| DAPK1       | 9q21.33  | -0.01751 | 0.733009 | 0.813611 |
| FAM167A-AS1 | 8p23.1   | -0.0175  | 0.733167 | 0.813705 |
| KCNU1       | 8p11.23  | -0.0175  | 0.733189 | 0.813705 |
| TCAM1P      | 17q23.3  | -0.0175  | 0.733216 | 0.813705 |
| UGGT1       | 2q14.3   | -0.01749 | 0.733265 | 0.813714 |
| LYPD4       | 19q13.2  | -0.01748 | 0.733496 | 0.813925 |
| SAMD8       | 10q22.2  | -0.01747 | 0.73363  | 0.814029 |
| EFHC1       | 6p12.2   | -0.01746 | 0.733695 | 0.814032 |
| PDK1        | 2q31.1   | 0.017462 | 0.733714 | 0.814032 |
| C6ORF118    | 6q27     | 0.01745  | 0.733882 | 0.814172 |
| INO80B      | 2p13.1   | -0.01745 | 0.733947 | 0.814172 |
| GNL1        | 6p21.33  | 0.017438 | 0.734052 | 0.814172 |
| PABPC3      | 13q12.13 | -0.01744 | 0.734064 | 0.814172 |
| PSMA2       | 7p14.1   | 0.017433 | 0.734134 | 0.814172 |
| MYOF        | 10q23.33 | -0.01743 | 0.734134 | 0.814172 |
| NFIC        | 19p13.3  | 0.017431 | 0.734162 | 0.814172 |
| MX1         | 21q22.3  | 0.017431 | 0.734165 | 0.814172 |
| PPP1R3A     | 7q31.1   | 0.017415 | 0.734403 | 0.814391 |
| IFNG        | 12q15    | -0.0174  | 0.734592 | 0.814554 |
| SAP30L      | 5q33.2   | -0.0174  | 0.734636 | 0.814559 |
| TMEM173     | 5q31.2   | 0.017395 | 0.734696 | 0.81458  |
| MDFI        | 6p21.1   | -0.01738 | 0.734876 | 0.814701 |
| MGA         | 15q15.1  | 0.017379 | 0.734921 | 0.814701 |
| OTUD4       | 4q31.21  | 0.017379 | 0.734927 | 0.814701 |
| GMPR        | 6p22.3   | -0.01737 | 0.735015 | 0.814754 |
| SRR         | 17p13.3  | -0.01737 | 0.735107 | 0.81481  |
| GAD2        | 10p12.1  | 0.017359 | 0.735215 | 0.81486  |
| DCUN1D4     | 4q12     | 0.017358 | 0.735234 | 0.81486  |
| POLG2       | 17q23.3  | -0.01735 | 0.735303 | 0.814886 |
| CERS6       | 2q24.3   | -0.01735 | 0.735338 | 0.814886 |
| C2CD4D-AS1  | 1q21.3   | -0.01734 | 0.735478 | 0.814967 |
| TBC1D1      | 4p14     | -0.01734 | 0.735493 | 0.814967 |
| SCARNA7     | 3q25.33  | 0.017332 | 0.735614 | 0.815056 |
| DDI1        | 11q22.3  | 0.017316 | 0.735847 | 0.815269 |
| AP3M2       | 8p11.21  | 0.017299 | 0.736093 | 0.815497 |
| TPD52       | 8q21.13  | -0.01729 | 0.736223 | 0.815596 |
| ANO7        | 2q37.3   | 0.017279 | 0.7364   | 0.815747 |
| PALM2       | 9q31.3   | 0.017266 | 0.736584 | 0.815905 |
| ZNF114      | 19q13.33 | 0.017261 | 0.736652 | 0.815935 |
| PFN3        | 5q35.3   | 0.017252 | 0.736785 | 0.816002 |
| PPP1R3G     | 6p25.1   | -0.01725 | 0.73684  | 0.816002 |
| LOC440040   | 11p11.12 | -0.01725 | 0.736862 | 0.816002 |
| OR51S1      | 11p15.4  | -0.01725 | 0.736875 | 0.816002 |
| FAM53A      | 4p16.3   | 0.017235 | 0.737045 | 0.816132 |
| MMEL1       | 1p36.32  | -0.01723 | 0.737074 | 0.816132 |
| C9ORF106    | 9q34.11  | -0.01723 | 0.737146 | 0.816167 |
| MOS         | 8q12.1   | -0.01721 | 0.737413 | 0.816378 |
| KCNE5       | Xq23     | 0.017209 | 0.737418 | 0.816378 |
| KCNK15      | 20q13.12 | 0.017198 | 0.737582 | 0.816514 |
| KLF15       | 3q21.3   | -0.01719 | 0.737631 | 0.816518 |
| RGPD5       | 2q13     | -0.01719 | 0.737667 | 0.816518 |

|                  |                 |          |          |          |
|------------------|-----------------|----------|----------|----------|
| DENND2A          | 7q34            | -0.01718 | 0.737795 | 0.816605 |
| ALG12            | 22q13.33        | 0.017181 | 0.737827 | 0.816605 |
| OR52B2           | 11p15.4         | 0.017176 | 0.737913 | 0.816655 |
| PAGE1            | Xp11.23         | -0.01716 | 0.738152 | 0.816874 |
| H1FX             | 3q21.3          | -0.01713 | 0.738656 | 0.817374 |
| PHB              | 17q21.33        | 0.017122 | 0.738694 | 0.817374 |
| SF3A3            | 1p34.3          | 0.01712  | 0.738726 | 0.817374 |
| UMODL1-AS1       | 21q22.3         | -0.0171  | 0.739042 | 0.817678 |
| B9D2             | 19q13.2         | -0.01709 | 0.739179 | 0.817784 |
| TNRC6B           | 22q13.1         | 0.017081 | 0.739299 | 0.817872 |
| STX19            | 3q11.2          | 0.017074 | 0.7394   | 0.817939 |
| SNORA58          | 3q22.1          | -0.01706 | 0.739607 | 0.818123 |
| GUCY2EP          | 11q13.5         | 0.017049 | 0.739772 | 0.81826  |
| CYP4F29P         | 21q11.2         | 0.017025 | 0.740129 | 0.818609 |
| ROPN1            | 3q21.1          | 0.01702  | 0.740202 | 0.818646 |
| ATP8B1           | 18q21.31        | 0.017017 | 0.740246 | 0.818648 |
| JAK2             | 9p24.1          | -0.01701 | 0.740363 | 0.818733 |
| AMT              | 3p21.31         | -0.017   | 0.740522 | 0.818863 |
| SPACA5           | Xp11.23         | 0.016994 | 0.740588 | 0.818891 |
| PARK7            | 1p36.23         | 0.01699  | 0.740639 | 0.818902 |
| DPPA2            | 3q13.13         | 0.016969 | 0.740952 | 0.819203 |
| MT1B             | 16q13           | 0.016959 | 0.741101 | 0.819313 |
| CFL1             | 11q13.1         | 0.016957 | 0.741133 | 0.819313 |
| KRT34            | 17q21.2         | -0.01695 | 0.741277 | 0.819403 |
| CCDC103          | 17q21.31        | -0.01694 | 0.741318 | 0.819403 |
| CD200R1L         | 3q13.2          | -0.01694 | 0.741337 | 0.819403 |
| TBC1D3P1-DHX40P1 | 17q23.1         | -0.01693 | 0.741453 | 0.819486 |
| NDST2            | 10q22.2         | -0.01692 | 0.741681 | 0.819693 |
| FAM169B          | 15q26.3         | -0.01691 | 0.741883 | 0.81987  |
| NOBOX            | 7q35            | 0.016892 | 0.74208  | 0.820019 |
| LILRB5           | 19q13.42        | 0.016891 | 0.742103 | 0.820019 |
| SPRR2F           | 1q21.3          | -0.01689 | 0.742181 | 0.820019 |
| OR2A12           | 7q35            | 0.016886 | 0.742181 | 0.820019 |
| FLJ37453         | 1p36.21         | -0.01688 | 0.742322 | 0.820129 |
| TEFM             | 17q11.2         | 0.01687  | 0.742404 | 0.820175 |
| PSMD13           | 11p15.5         | 0.01685  | 0.742709 | 0.820435 |
| TP53I13          | 17q11.2         | 0.016849 | 0.742721 | 0.820435 |
| MDK              | 11p11.2         | -0.01684 | 0.742899 | 0.820586 |
| BMP15            | Xp11.22         | -0.01682 | 0.743102 | 0.820765 |
| C16ORF70         | 16q22.1         | 0.016818 | 0.74317  | 0.820795 |
| LINC00346        | 13q34           | 0.016812 | 0.743267 | 0.820839 |
| CCDC167          | 6p21.2          | 0.016808 | 0.743321 | 0.820839 |
| PPM1F            | 22q11.22        | 0.016807 | 0.743334 | 0.820839 |
| KY               | 3q22.2          | -0.0168  | 0.743394 | 0.820861 |
| SIX5             | 19q13.32        | -0.01679 | 0.743552 | 0.82099  |
| ZNF648           | 1q25.3          | -0.01678 | 0.743727 | 0.821135 |
| ZNF652           | 17q21.32-q21.33 | 0.016778 | 0.743765 | 0.821135 |
| BAIAP3           | 16p13.3         | 0.016768 | 0.743908 | 0.821247 |
| GMPPA            | 2q35            | -0.01676 | 0.743959 | 0.821258 |
| ZNF613           | 19q13.41        | -0.01676 | 0.744    | 0.821258 |
| ERGIC1           | 5q35.1          | -0.01676 | 0.744066 | 0.821286 |
|                  | 2-Mar 1q41      | 0.016745 | 0.744257 | 0.821451 |
| SSX3             | Xp11.23         | -0.01673 | 0.74448  | 0.821652 |
| LACTB2           | 8q13.3          | -0.01672 | 0.744625 | 0.821767 |
| PRKCI            | 3q26.2          | -0.01671 | 0.744822 | 0.821939 |
| TESC             | 12q24.22        | 0.016655 | 0.745584 | 0.822734 |
| XKR7             | 20q11.21        | 0.016647 | 0.745697 | 0.822814 |
| EFNB2            | 13q33.3         | -0.01664 | 0.745752 | 0.822829 |



|           |                 |          |          |          |
|-----------|-----------------|----------|----------|----------|
| ERBB2     | 17q12           | -0.01662 | 0.746146 | 0.823218 |
| MPST      | 22q12.3         | 0.016606 | 0.746298 | 0.823331 |
| SETD3     | 14q32.2         | 0.016604 | 0.74633  | 0.823331 |
| RSAD1     | 17q21.33        | -0.01659 | 0.746479 | 0.82345  |
| RPS19     | 19q13.2         | -0.01658 | 0.746711 | 0.823661 |
| IL13      | 5q31.1          | -0.01657 | 0.746793 | 0.823706 |
| MYO1H     | 12q24.11        | -0.01657 | 0.746888 | 0.823765 |
| RHBDF2    | 17q25.1         | -0.01656 | 0.746975 | 0.823815 |
| OOSP2     | 11q12.1         | 0.016556 | 0.747032 | 0.823833 |
| NAPSA     | 19q13.33        | -0.01654 | 0.747281 | 0.824063 |
| DLG5-AS1  | 10q22.3         | 0.01652  | 0.747575 | 0.824342 |
| DBIL5P    | 17p13.3         | -0.01651 | 0.747712 | 0.824419 |
| ADGRG7    | 3q12.2          | -0.01651 | 0.747732 | 0.824419 |
| TXK       | 4p12            | -0.01651 | 0.747769 | 0.824419 |
| ZNF670    | 1q44            | 0.0165   | 0.747868 | 0.824461 |
| NDUFA11   | 19p13.3         | -0.0165  | 0.747899 | 0.824461 |
| GOLPH3L   | 1q21.3          | 0.016493 | 0.747969 | 0.824461 |
| BPIFB3    | 20q11.21        | -0.01649 | 0.747972 | 0.824461 |
| NLRP6     | 11p15.5         | 0.016485 | 0.748094 | 0.82455  |
| GPATCH2L  | 14q24.3         | 0.016475 | 0.748233 | 0.824658 |
| SEM1      | 7q21.3          | 0.016472 | 0.748284 | 0.824669 |
| TRPA1     | 8q21.11         | -0.01646 | 0.748513 | 0.824761 |
| MPDU1     | 17p13.1         | -0.01645 | 0.748535 | 0.824761 |
| TDRG1     | 6p21.2          | -0.01645 | 0.748562 | 0.824761 |
| EMILIN3   | 20q12           | -0.01645 | 0.748586 | 0.824761 |
| PPP1R17   | 7p14.3          | -0.01645 | 0.748605 | 0.824761 |
| CDHR5     | 11p15.5         | -0.01645 | 0.748615 | 0.824761 |
| KLHL8     | 4q22.1          | -0.01645 | 0.748675 | 0.824782 |
| CAPN12    | 19q13.2         | -0.01642 | 0.749053 | 0.825116 |
| BPESC1    | 3q23            | 0.016419 | 0.74906  | 0.825116 |
| LINC00476 | 9q22.32         | 0.016415 | 0.749123 | 0.825119 |
| SLC5A3    | 21q22.11        | 0.016413 | 0.749146 | 0.825119 |
| DIPK1B    | 9q34.3          | 0.016397 | 0.749394 | 0.825347 |
| NFKBIL1   | 6p21.33         | 0.016388 | 0.749518 | 0.825438 |
| PRMT8     | 12p13.32        | -0.01637 | 0.749788 | 0.82569  |
| BAIAP2L1  | 7q21.3-q22.1    | 0.01636  | 0.749931 | 0.82573  |
| LINC01566 | 16p11.1         | 0.016359 | 0.749946 | 0.82573  |
| ANKRD26P3 | 13q12.11        | -0.01636 | 0.749947 | 0.82573  |
| CREG2     | 2q11.2          | 0.016345 | 0.750157 | 0.825915 |
| HRCT1     | 9p13.3          | -0.01634 | 0.750288 | 0.826013 |
| RPS27     | 1q21.3          | -0.01633 | 0.750367 | 0.826056 |
| FOPNL     | 16p13.11        | -0.01633 | 0.750424 | 0.826073 |
| KCNQ1DN   | 11p15.4 11p15.5 | 0.01632  | 0.750518 | 0.826131 |
| YWHAE     | 17p13.3         | -0.01631 | 0.750724 | 0.826174 |
| MRPL21    | 11q13.3         | 0.016304 | 0.750755 | 0.826174 |
| ZFP42     | 4q35.2          | -0.0163  | 0.750836 | 0.826174 |
| KIF1BP    | 10q22.1         | 0.016298 | 0.750854 | 0.826174 |
| TMCO4     | 1p36.13         | 0.016297 | 0.75087  | 0.826174 |
| STOML3    | 13q13.3         | -0.0163  | 0.750874 | 0.826174 |
| OR2AE1    | 7q22.1          | -0.0163  | 0.750883 | 0.826174 |
| ARSH      | Xp22.33         | 0.016295 | 0.750887 | 0.826174 |
| ZNF530    | 19q13.43        | 0.016286 | 0.751026 | 0.826281 |
| HNRNPCL3  | 1p36.21         | -0.01623 | 0.751887 | 0.827183 |
| CRH       | 8q13.1          | 0.016223 | 0.751959 | 0.827217 |
| ATXN1L    | 16q22.2         | 0.016205 | 0.752223 | 0.827462 |
| TBL1X     | Xp22.31-p22.2   | 0.016197 | 0.752344 | 0.82749  |
| SOHLH1    | 9q34.3          | 0.016195 | 0.752369 | 0.82749  |
| RELL1     | 4p14            | 0.016195 | 0.752372 | 0.82749  |

|            |                |          |          |          |
|------------|----------------|----------|----------|----------|
| ZNF10      | 12q24.33       | -0.01619 | 0.752427 | 0.827504 |
| C22ORF24   | 22q12.3        | 0.01616  | 0.752894 | 0.827967 |
| OR1E2      | 17p13.2        | -0.01616 | 0.75293  | 0.827967 |
| GPD1       | 12q13.12       | -0.01615 | 0.753075 | 0.828079 |
| SLC25A33   | 1p36.22        | 0.016144 | 0.753127 | 0.828079 |
| ARHGEF35   | 7q35           | 0.016142 | 0.753156 | 0.828079 |
| IGF1R      | 15q26.3        | -0.01613 | 0.753392 | 0.828267 |
| ZNF716     | 7p11.2         | -0.01612 | 0.75341  | 0.828267 |
| NAT16      | 7q22.1         | -0.01612 | 0.753463 | 0.828279 |
| NOXO1      | 16p13.3        | 0.016108 | 0.753659 | 0.82845  |
| GYS2       | 12p12.1        | -0.01609 | 0.753947 | 0.828721 |
| TRIM75P    | 4q32.3         | 0.016079 | 0.754095 | 0.828825 |
| ZNF682     | 19p12          | 0.016077 | 0.754124 | 0.828825 |
| ADM        | 11p15.4        | 0.016067 | 0.754268 | 0.828937 |
| C17ORF97   | 17p13.3        | 0.01606  | 0.754367 | 0.829    |
| MGAM2      | 7q34           | 0.016057 | 0.754415 | 0.829008 |
| ETFDH      | 4q32.1         | -0.01604 | 0.754634 | 0.829203 |
| PTDSS1     | 8q22.1         | -0.01603 | 0.754755 | 0.829291 |
| SH2D5      | 1p36.12        | -0.01603 | 0.754808 | 0.829304 |
| CINP       | 14q32.31       | -0.01601 | 0.755074 | 0.82955  |
| PGA5       | 11q12.2        | -0.01599 | 0.755426 | 0.829891 |
| OPRM1      | 6q25.2         | -0.01598 | 0.755487 | 0.829913 |
| TRAPPC2L   | 16q24.3        | -0.01598 | 0.755557 | 0.829944 |
| TAOK1      | 17q11.2        | 0.015976 | 0.755619 | 0.829967 |
| PRAMEF20   | 1p36.21        | -0.01597 | 0.755732 | 0.830045 |
| MYL7       | 7p13           | -0.01595 | 0.75595  | 0.830239 |
| SKI        | 1p36.33-p36.32 | -0.01595 | 0.756027 | 0.830265 |
| HSP90AA1   | 14q32.31       | -0.01595 | 0.756056 | 0.830265 |
| IMMP1L     | 11p13          | 0.015933 | 0.756259 | 0.830442 |
| SEC61A1    | 3q21.3         | 0.015911 | 0.756573 | 0.830741 |
| MPRIP      | 17p11.2        | 0.015906 | 0.756656 | 0.830783 |
| POMP       | 13q12.3        | -0.0159  | 0.756707 | 0.830783 |
| INSM2      | 14q13.2        | -0.0159  | 0.756751 | 0.830783 |
| ZBTB32     | 19q13.12       | -0.0159  | 0.756777 | 0.830783 |
| PDSS2      | 6q21           | -0.01587 | 0.757118 | 0.831067 |
| BIVM       | 13q33.1        | -0.01587 | 0.757118 | 0.831067 |
| SCFD2      | 4q12           | 0.01585  | 0.757479 | 0.831417 |
| OR6W1P     | 7q34           | 0.015828 | 0.757814 | 0.831739 |
| GUCA1C     | 3q13.13        | 0.01582  | 0.757924 | 0.831814 |
| YY1        | 14q32.2        | 0.015817 | 0.757977 | 0.831826 |
| MANEAL     | 1p34.3         | 0.015802 | 0.758194 | 0.832019 |
| APOA2      | 1q23.3         | -0.01578 | 0.758458 | 0.832222 |
| ZNF786     | 7q36.1         | -0.01578 | 0.758462 | 0.832222 |
| ZNF317     | 19p13.2        | 0.01576  | 0.758823 | 0.832523 |
| TFCP2L1    | 2q14.2         | 0.015759 | 0.758826 | 0.832523 |
| TRIP11     | 14q32.12       | 0.015757 | 0.758861 | 0.832523 |
| KCNIP4-IT1 | 4p15.2         | 0.015745 | 0.759044 | 0.832678 |
| USP27X-AS1 | Xp11.23        | -0.01573 | 0.759332 | 0.832949 |
| GPR142     | 17q25.1        | -0.01571 | 0.75962  | 0.833218 |
| ANG        | 14q11.2        | 0.015701 | 0.759688 | 0.833248 |
| VPS36      | 13q14.3        | -0.01569 | 0.759829 | 0.833356 |
| AHCY       | 20q11.22       | -0.01567 | 0.760106 | 0.833615 |
| KLHL1      | 13q21.33       | -0.01567 | 0.760168 | 0.833637 |
| TAS1R1     | 1p36.31        | -0.01565 | 0.760453 | 0.833895 |
| GOLGA8DP   | 15q11.2        | -0.01565 | 0.760487 | 0.833895 |
| PPA2       | 4q24           | -0.01564 | 0.760573 | 0.833944 |
| TRAF3IP1   | 2q37.3         | 0.015635 | 0.760666 | 0.834    |
| CA2        | 8q21.2         | -0.01562 | 0.760828 | 0.834133 |

|            |                |          |          |          |
|------------|----------------|----------|----------|----------|
| LOC727896  | 18p11.31       | 0.01562  | 0.760896 | 0.834161 |
| ZNF280B    | 22q11.22       | 0.015614 | 0.760975 | 0.834203 |
| C16ORF92   | 16p11.2        | -0.0156  | 0.761123 | 0.834319 |
|            | 3-Mar 5q23.2   | 0.015582 | 0.761458 | 0.834641 |
| POU3F2     | 6q16.1         | -0.01558 | 0.761528 | 0.834672 |
| SNORA50A   | 16q21          | 0.015571 | 0.761617 | 0.834724 |
| PSMA4      | 15q25.1        | 0.015563 | 0.761742 | 0.834778 |
| C22ORF34   | 22q13.33       | -0.01556 | 0.76175  | 0.834778 |
| LINC00905  | 19p13.12       | 0.015551 | 0.761923 | 0.834922 |
| CATSPER2P1 | 15q15.3        | -0.01554 | 0.762021 | 0.834976 |
| FN3KRP     | 17q25.3        | -0.01554 | 0.762056 | 0.834976 |
| ZBTB42     | 14q32.33       | -0.01554 | 0.762126 | 0.835007 |
| CAMTA1     | 1p36.31-p36.23 | -0.01553 | 0.762216 | 0.835025 |
| KIF26A     | 14q32.33       | 0.01553  | 0.762225 | 0.835025 |
| RPN1       | 3q21.3         | 0.015524 | 0.762318 | 0.835059 |
| THBS3      | 1q22           | -0.01552 | 0.76234  | 0.835059 |
| DDRGK1     | 20p13          | -0.01551 | 0.762455 | 0.835133 |
| CLDN12     | 7q21.13        | 0.015512 | 0.762491 | 0.835133 |
| GANC       | 15q15.1        | 0.015506 | 0.762583 | 0.835188 |
| UBXN7      | 3q29           | 0.015492 | 0.762791 | 0.835335 |
| WSB2       | 12q24.23       | -0.01549 | 0.762801 | 0.835335 |
| CLPSL2     | 6p21.31        | -0.01548 | 0.762919 | 0.835419 |
| ATP5CKMT   | 5p15.2         | -0.01547 | 0.763152 | 0.835629 |
| CNMD       | 13q14.3        | -0.01546 | 0.763238 | 0.835677 |
| RPLP2      | 11p15.5        | 0.015444 | 0.763514 | 0.835933 |
| PAG1       | 8q21.13        | -0.01544 | 0.763629 | 0.836014 |
| IRF9       | 14q12          | -0.01541 | 0.763949 | 0.836318 |
| HIGD2B     | 15q24.1        | 0.015411 | 0.764001 | 0.836329 |
| PNMT       | 17q12          | -0.01539 | 0.764251 | 0.836558 |
| TOX3       | 16q12.1        | 0.015359 | 0.764768 | 0.837078 |
| METTL2A    | 17q23.2        | 0.015344 | 0.764995 | 0.837281 |
| ASIC4      | 2q35           | -0.01532 | 0.765332 | 0.837603 |
| SLC39A12   | 10p12.33       | -0.01531 | 0.765441 | 0.837677 |
| KCNQ2      | 20q13.33       | 0.015307 | 0.765544 | 0.837743 |
| FHDC1      | 4q31.3         | 0.015301 | 0.765626 | 0.837788 |
| FAM184B    | 4p15.32-p15.31 | 0.015288 | 0.765827 | 0.837961 |
| C5ORF60    | 5q35.3         | 0.015278 | 0.765974 | 0.838077 |
| GORASP1    | 3p22.2         | 0.015256 | 0.766295 | 0.838349 |
| GOLGA6L6   | 15q11.2        | -0.01526 | 0.766306 | 0.838349 |
| PAX8-AS1   | 2q14.1         | -0.01525 | 0.766433 | 0.838441 |
| HGC6.3     | 6q27           | 0.015235 | 0.766616 | 0.838552 |
| MED16      | 19p13.3        | 0.015234 | 0.766634 | 0.838552 |
| SNORA70    | Xq28           | -0.01523 | 0.76667  | 0.838552 |
| EPHX2      | 8p21.2-p21.1   | -0.01523 | 0.766702 | 0.838552 |
| NUDT16P1   | 3q22.1         | 0.015206 | 0.767048 | 0.838885 |
| POM121L9P  | 22q11.23       | -0.0152  | 0.767162 | 0.838964 |
| ZNF696     | 8q24.3         | 0.015189 | 0.767304 | 0.839074 |
| SLC25A21   | 14q13.3        | 0.015185 | 0.767357 | 0.839086 |
| VN1R2      | 19q13.42       | -0.01518 | 0.7675   | 0.839184 |
| CGB7       | 19q13.33       | 0.015173 | 0.76753  | 0.839184 |
| TRMT9B     | 8p22           | -0.01515 | 0.767816 | 0.83944  |
| DERL3      | 22q11.23       | -0.01515 | 0.767852 | 0.83944  |
| PPP4R1     | 18p11.22       | -0.01515 | 0.76789  | 0.83944  |
| BCKDHA     | 19q13.2        | 0.015129 | 0.768185 | 0.839681 |
| CELF2      | 10p14          | 0.015129 | 0.768195 | 0.839681 |
| CABP5      | 19q13.33       | 0.015121 | 0.768312 | 0.839683 |
| RAD50      | 5q31.1         | -0.01512 | 0.768342 | 0.839683 |
| ARHGEF28   | 5q13.2         | 0.015118 | 0.768352 | 0.839683 |

|             |            |          |          |          |
|-------------|------------|----------|----------|----------|
| MBOAT2      | 2p25.1     | -0.01512 | 0.768364 | 0.839683 |
| KRTCAP3     | 2p23.3     | 0.015098 | 0.768646 | 0.839812 |
| SCGB1D4     | 11q12.3    | -0.01509 | 0.768707 | 0.839812 |
| CSH1        | 17q23.3    | -0.01509 | 0.768707 | 0.839812 |
| TSPY1       | Yp11.2     | -0.01509 | 0.768707 | 0.839812 |
| ACVR2B      | 3p22.2     | -0.01509 | 0.768717 | 0.839812 |
| IFIT1B      | 10q23.31   | 0.015093 | 0.768734 | 0.839812 |
| CAMKMT      | 2p21       | -0.01508 | 0.768993 | 0.840049 |
| CDK6        | 7q21.2     | -0.01507 | 0.769134 | 0.840157 |
| UCHL3       | 13q22.2    | -0.01506 | 0.769188 | 0.840171 |
| OLMALINC    | 10q24.31   | 0.015053 | 0.76932  | 0.840268 |
| KIR2DL3     | 19q13.42   | 0.015042 | 0.769485 | 0.840369 |
| LINC01959   | 5q31.1     | 0.015041 | 0.769505 | 0.840369 |
| ECD         | 10q22.2    | 0.015039 | 0.769538 | 0.840369 |
| SEPTIN9     | 17q25.3    | 0.015032 | 0.769631 | 0.840425 |
| GSG1        | 12p13.1    | -0.01503 | 0.769735 | 0.840493 |
| NF1         | 17q11.2    | -0.01502 | 0.769804 | 0.840522 |
| CNTLN       | 9p22.2     | -0.01502 | 0.769871 | 0.84055  |
| LINC00552   | 13q34      | 0.015006 | 0.77002  | 0.840659 |
| TEX37       | 2p11.2     | -0.015   | 0.770055 | 0.840659 |
| GAGE10      | Xp11.23    | -0.01498 | 0.770442 | 0.841035 |
| METRNL      | 17q25.3    | 0.014974 | 0.770506 | 0.84106  |
| CYB561      | 17q23.3    | 0.014951 | 0.770836 | 0.84135  |
| FAM9A       | Xp22.31    | 0.01495  | 0.770856 | 0.84135  |
| ST20-AS1    | 15q25.1    | -0.01494 | 0.771054 | 0.841471 |
| LINC00691   | 3p24.2     | 0.014936 | 0.771059 | 0.841471 |
| SMIM13      | 6p24.2     | 0.014934 | 0.771093 | 0.841471 |
| CIRBP       | 19p13.3    | -0.01492 | 0.771231 | 0.841542 |
| LINC00442   | 13q12.11   | -0.01492 | 0.771242 | 0.841542 |
| CRY1        | 12q23.3    | -0.01492 | 0.771314 | 0.841575 |
| DMRT2       | 9p24.3     | -0.01491 | 0.771394 | 0.841617 |
| KIAA1211    | 4q12       | 0.014886 | 0.771818 | 0.842033 |
| GUCY2GP     | 10q25.2    | -0.01488 | 0.771885 | 0.842039 |
| PEX10       | 1p36.32    | -0.01488 | 0.771953 | 0.842039 |
| DNAJC17     | 15q15.1    | 0.014876 | 0.771966 | 0.842039 |
| SCARNA27    | 6p24.3     | 0.014874 | 0.771991 | 0.842039 |
| SPIN3       | Xp11.21    | -0.01486 | 0.772136 | 0.842145 |
| NYAP2       | 2q36.3     | -0.01486 | 0.772173 | 0.842145 |
| RRP7A       | 22q13.2    | 0.01484  | 0.772498 | 0.842454 |
| RAPGEF4-AS1 | 2q31.1     | -0.01484 | 0.77257  | 0.842486 |
| ZDHHC20     | 13q12.11   | 0.014819 | 0.772803 | 0.842513 |
| SNORA4      | 3q27.3     | -0.01482 | 0.772808 | 0.842513 |
| ATP6V0A1    | 17q21.2    | -0.01482 | 0.772823 | 0.842513 |
| DLK2        | 6p21.1     | -0.01482 | 0.772824 | 0.842513 |
| SAA1        | 11p15.1    | -0.01482 | 0.772842 | 0.842513 |
| CCDC60      | 12q24.23   | -0.01482 | 0.772855 | 0.842513 |
| CARD11      | 7p22.2     | -0.01481 | 0.772973 | 0.842513 |
| GTF2H2C     | 5q13.2     | 0.014807 | 0.772993 | 0.842513 |
| HEATR9      | 17q12      | -0.01481 | 0.773002 | 0.842513 |
| GFOD1       | 6p23       | 0.014805 | 0.773015 | 0.842513 |
| GPD1L       | 3p22.3     | -0.0148  | 0.773092 | 0.84254  |
| PDCD2       | 6q27       | 0.014798 | 0.773124 | 0.84254  |
| PUF60       | 8q24.3     | -0.01478 | 0.773372 | 0.842764 |
| LATS1       | 6q25.1     | -0.01477 | 0.773583 | 0.842949 |
| CTBP1-DT    | 4p16.3     | -0.01476 | 0.773677 | 0.842969 |
| MRGPRX1     | 11p15.1 11 | 0.01476  | 0.773686 | 0.842969 |
| RTP2        | 3q27.3     | -0.01475 | 0.773838 | 0.843089 |
| MTX2        | 2q31.1     | -0.01473 | 0.774104 | 0.843321 |

|              |          |          |          |          |
|--------------|----------|----------|----------|----------|
| SEC23B       | 20p11.23 | 0.01473  | 0.774136 | 0.843321 |
| IL17RD       | 3p14.3   | -0.01472 | 0.774284 | 0.843436 |
| COX7C        | 5q14.3   | 0.014705 | 0.774515 | 0.843582 |
| C15ORF48     | 15q21.1  | -0.0147  | 0.774521 | 0.843582 |
| TPRKB        | 2p13.1   | -0.0147  | 0.774544 | 0.843582 |
| BAG1         | 9p13.3   | -0.0147  | 0.774589 | 0.843585 |
| OR6B3        | 2q37.3   | -0.01467 | 0.775033 | 0.844024 |
| MAOA         | Xp11.3   | -0.01467 | 0.775083 | 0.844032 |
| TBC1D26      | 17p12    | -0.01466 | 0.775193 | 0.84405  |
| SUCLG2       | 3p14.1   | -0.01465 | 0.775286 | 0.84405  |
| KRTAP4-8     | 17q21.2  | 0.014644 | 0.775421 | 0.84405  |
| RNASEH2C     | 11q13.1  | -0.01464 | 0.775424 | 0.84405  |
| PSMB6        | 17p13.2  | -0.01464 | 0.775475 | 0.84405  |
| PKN2         | 1p22.2   | -0.01464 | 0.775492 | 0.84405  |
| PRUNE2       | 9q21.2   | -0.01464 | 0.775495 | 0.84405  |
| OR2M5        | 1q44     | -0.01463 | 0.775563 | 0.84405  |
| OR5I1        | 11q12.1  | -0.01463 | 0.775563 | 0.84405  |
| OR8B12       | 11q24.2  | -0.01463 | 0.775563 | 0.84405  |
| OR4C16       | 11q11    | -0.01463 | 0.775563 | 0.84405  |
| USP9X        | Xp11.4   | 0.014627 | 0.775678 | 0.844129 |
| QARS         | 3p21.31  | 0.014608 | 0.775964 | 0.844394 |
| ZNF407       | 18q22.3  | 0.014599 | 0.776092 | 0.844488 |
| WIPF2        | 17q21.2  | 0.014596 | 0.776134 | 0.844488 |
| ARHGEF19     | 1p36.13  | 0.014584 | 0.776311 | 0.844634 |
| LRBA         | 4q31.3   | -0.01457 | 0.776491 | 0.844784 |
| CKB          | 14q32.33 | -0.01456 | 0.776642 | 0.844885 |
| USH1G        | 17q25.1  | -0.01456 | 0.776668 | 0.844885 |
| CDHR2        | 5q35.2   | -0.01456 | 0.776735 | 0.844912 |
| TMEM211      | 22q11.23 | -0.01455 | 0.776824 | 0.844963 |
| SPATA31D4    | 9q21.32  | -0.01454 | 0.777002 | 0.845078 |
| MMP23A       | 1p36.33  | -0.01454 | 0.777014 | 0.845078 |
| EFNA1        | 1q22     | 0.014522 | 0.777243 | 0.845281 |
| LOC100130093 | 1q42.13  | 0.014509 | 0.777439 | 0.845449 |
| OTUD6A       | Xq13.1   | -0.0145  | 0.777512 | 0.845482 |
| FTX          | Xq13.2   | 0.014488 | 0.777748 | 0.845692 |
| BIN3         | 8p21.3   | 0.014485 | 0.777793 | 0.845695 |
| MFSD9        | 2q12.1   | 0.014462 | 0.778137 | 0.846024 |
| OR8D2        | 11q24.2  | 0.014436 | 0.778522 | 0.846395 |
| AREG         | 4q13.3   | -0.01442 | 0.778771 | 0.846621 |
| CYP1A1       | 15q24.1  | -0.0144  | 0.77901  | 0.846834 |
| FAM76B       | 11q21    | 0.0144   | 0.779061 | 0.846844 |
| HRG          | 3q27.3   | -0.01439 | 0.779219 | 0.84697  |
| TMEM95       | 17p13.1  | 0.014384 | 0.779301 | 0.847013 |
| TCEANC2      | 1p32.3   | 0.014372 | 0.779489 | 0.847171 |
| UNC13A       | 19p13.11 | 0.014361 | 0.779643 | 0.847293 |
| OR5T2        | 11q12.1  | -0.01435 | 0.779817 | 0.847436 |
| SYAP1        | Xp22.2   | 0.014332 | 0.780074 | 0.847602 |
| ZNF816       | 19q13.41 | -0.01433 | 0.780074 | 0.847602 |
| DALRD3       | 3p21.31  | 0.014331 | 0.780097 | 0.847602 |
| ZNF70        | 22q11.23 | -0.01432 | 0.780267 | 0.847741 |
| STARD5       | 15q25.1  | 0.014313 | 0.78037  | 0.847807 |
| KIAA0232     | 4p16.1   | 0.014289 | 0.780718 | 0.848139 |
| GSTA3        | 6p12.2   | -0.01427 | 0.781017 | 0.8484   |
| TEX45        | 19p13.2  | -0.01427 | 0.781043 | 0.8484   |
| MIS12        | 17p13.2  | -0.01425 | 0.781378 | 0.848718 |
| DISP2        | 15q15.1  | 0.014219 | 0.781777 | 0.849106 |
| PSD2         | 5q31.2   | 0.01421  | 0.781906 | 0.8492   |
| RIMKLA       | 1p34.2   | -0.0142  | 0.782051 | 0.849311 |

|          |               |          |          |          |
|----------|---------------|----------|----------|----------|
| HNF4G    | 8q21.13       | -0.01419 | 0.782216 | 0.849443 |
| NPY4R    | 10q11.22      | -0.01417 | 0.782444 | 0.849595 |
| NCBP2AS2 | 3q29          | 0.014173 | 0.782467 | 0.849595 |
| CCDC173  | 2q31.1        | -0.01417 | 0.782483 | 0.849595 |
| MBOAT4   | 8p12          | 0.014166 | 0.782566 | 0.849639 |
| NLRP5    | 19q13.43      | -0.01416 | 0.782621 | 0.849653 |
| RPL11    | 1p36.11       | 0.014158 | 0.782683 | 0.849674 |
| RNF17    | 13q12.12      | 0.014152 | 0.78278  | 0.849734 |
| SCML4    | 6q21          | -0.01414 | 0.782934 | 0.849855 |
| UBXN2B   | 8q12.1        | -0.01413 | 0.783047 | 0.849931 |
| NEO1     | 15q24.1       | -0.01412 | 0.783292 | 0.850151 |
| C1QTNF12 | 1p36.33       | -0.01411 | 0.783404 | 0.850219 |
| TTLL8    | 22q13.33      | -0.01411 | 0.783477 | 0.850219 |
| RAP1GDS1 | 4q23          | -0.0141  | 0.783482 | 0.850219 |
| REC114   | 15q24.1       | -0.01409 | 0.783697 | 0.850406 |
| SS18L2   | 3p22.1        | -0.01407 | 0.783978 | 0.850665 |
| ACAD10   | 12q24.12      | 0.014062 | 0.78412  | 0.850773 |
| ANAPC11  | 17q25.3       | -0.01405 | 0.784287 | 0.85086  |
| EIF5B    | 2q11.2        | 0.01405  | 0.784304 | 0.85086  |
| SSR1     | 6p24.3        | 0.014048 | 0.784333 | 0.85086  |
| UPP2     | 2q24.1        | 0.014045 | 0.78437  | 0.85086  |
| LDLRAD2  | 1p36.12       | -0.01403 | 0.784658 | 0.851127 |
| NEMF     | 14q21.3       | -0.01402 | 0.784803 | 0.851238 |
| CBX4     | 17q25.3       | 0.013993 | 0.785158 | 0.851576 |
| PSMB10   | 16q22.1       | -0.01399 | 0.785235 | 0.851614 |
| MIPOL1   | 14q13.3-q21.1 | -0.01398 | 0.785414 | 0.851762 |
| TBL1Y    | Yp11.2        | -0.01396 | 0.785647 | 0.851969 |
| SZT2     | 1p34.2        | 0.013951 | 0.78579  | 0.852066 |
| SIN3A    | 15q24.2       | 0.013948 | 0.785822 | 0.852066 |
| PFKFB4   | 3p21.31       | -0.01393 | 0.78609  | 0.85231  |
| HMX3     | 10q26.13      | 0.013918 | 0.786278 | 0.852468 |
| SYTL4    | Xq22.1        | 0.013911 | 0.786385 | 0.852538 |
| PIGS     | 17q11.2       | 0.013891 | 0.78668  | 0.852812 |
| ATP6V0B  | 1p34.1        | 0.013887 | 0.786748 | 0.852839 |
| RP1      | 8q11.23-q12.1 | -0.01388 | 0.786846 | 0.852899 |
| XIST     | Xq13.2        | -0.01387 | 0.786934 | 0.852915 |
| IL18RAP  | 2q12.1        | -0.01387 | 0.786975 | 0.852915 |
| TNK1     | 17p13.1       | 0.013871 | 0.786988 | 0.852915 |
| NCDN     | 1p34.3        | 0.013861 | 0.787126 | 0.853018 |
| CCER1    | 12q21.33      | 0.013848 | 0.787327 | 0.853166 |
| CFAP97D1 | 17q21.31      | -0.01385 | 0.787347 | 0.853166 |
| CFAP74   | 1p36.33       | 0.013831 | 0.787581 | 0.853372 |
| NDUFA1   | Xq24          | 0.01382  | 0.787745 | 0.853479 |
| ENTPD6   | 20p11.21      | 0.013819 | 0.787765 | 0.853479 |
| NDUFB2   | 7q34          | -0.01381 | 0.787855 | 0.853502 |
| USP32P1  | 17p11.2       | 0.013812 | 0.787871 | 0.853502 |
| FAM166B  | 9p13.3        | 0.013798 | 0.788081 | 0.853683 |
| SNORA1   | 11q21         | 0.013786 | 0.788256 | 0.853827 |
| R3HDM4   | 19p13.3       | -0.01375 | 0.788856 | 0.85443  |
| EEF1DP3  | 13q13.1       | -0.01373 | 0.789026 | 0.854568 |
| IGSF3    | 1p13.1        | -0.01373 | 0.789114 | 0.854617 |
| ERLIN2   | 8p11.23       | -0.01372 | 0.789237 | 0.854704 |
| TUSC2    | 3p21.31       | 0.013711 | 0.789376 | 0.854808 |
| YWHAEP7  | 17q12         | -0.01371 | 0.789434 | 0.854826 |
| PRPF40A  | 2q23.3        | 0.013685 | 0.789776 | 0.855118 |
| TBX20    | 7p14.2        | 0.013684 | 0.78979  | 0.855118 |
| C1GALT1  | 7p22.1-p21.3  | -0.01368 | 0.789873 | 0.855162 |
| TMEM31   | Xq22.2        | 0.013673 | 0.789951 | 0.8552   |

|           |              |          |          |          |
|-----------|--------------|----------|----------|----------|
| TMEM223   | 11q12.3      | -0.01367 | 0.789999 | 0.855206 |
| CTRB2     | 16q23.1      | -0.01367 | 0.790054 | 0.855219 |
| SNORA26   | 4q12         | -0.01365 | 0.790281 | 0.855399 |
| TEC       | 4p12-p11     | 0.013649 | 0.790306 | 0.855399 |
| ZKSCAN1   | 7q22.1       | -0.01364 | 0.790412 | 0.855468 |
| ACTR3B    | 7q36.1-q36.2 | 0.013626 | 0.790664 | 0.85568  |
| POLR2B    | 4q12         | 0.013624 | 0.790693 | 0.85568  |
| C2ORF78   | 2p13.1       | 0.013614 | 0.790844 | 0.85579  |
| COX6C     | 8q22.2       | 0.013611 | 0.790881 | 0.85579  |
| KRTAP1-3  | 17q21.2      | -0.01359 | 0.791204 | 0.856068 |
| OTOP3     | 17q25.1      | 0.013588 | 0.791233 | 0.856068 |
| ASXL1     | 20q11.21     | 0.013585 | 0.791265 | 0.856068 |
| PCDHGC4   | 5q31.3       | 0.013576 | 0.791413 | 0.856181 |
| BMP2      | 20p12.3      | 0.013567 | 0.79155  | 0.85626  |
| THAP7     | 22q11.21     | 0.013564 | 0.791588 | 0.85626  |
| PRRT1     | 6p21.32      | -0.01356 | 0.791614 | 0.85626  |
| KCNJ16    | 17q24.3      | -0.01355 | 0.791731 | 0.85634  |
| SDCCAG8   | 1q43-q44     | -0.01355 | 0.791844 | 0.856416 |
| NEU2      | 2q37.1       | 0.013534 | 0.792041 | 0.856498 |
| MSH3      | 5q14.1       | 0.013533 | 0.792047 | 0.856498 |
| MYC       | 8q24.21      | 0.013533 | 0.792047 | 0.856498 |
| TUBE1     | 6q21         | 0.013525 | 0.792173 | 0.856588 |
| PACRGL    | 4p15.31      | 0.013519 | 0.792264 | 0.856639 |
| MAS1      | 6q25.3       | -0.0135  | 0.792588 | 0.85686  |
| SLC22A24  | 11q12.3      | -0.0135  | 0.792594 | 0.85686  |
| POU2F3    | 11q23.3      | -0.0135  | 0.792597 | 0.85686  |
| MEIOB     | 16p13.3      | -0.01349 | 0.792643 | 0.856864 |
| HSD17B2   | 16q23.3      | -0.01349 | 0.792733 | 0.856915 |
| CASP1     | 11q22.3      | 0.013477 | 0.792898 | 0.857047 |
| RPRML     | 17q21.32     | 0.013464 | 0.793083 | 0.857181 |
| GSK3B     | 3q13.33      | -0.01346 | 0.793108 | 0.857181 |
| AFF1      | 4q21.3-q22.1 | -0.01345 | 0.793315 | 0.85728  |
| FAM136BP  | 6p25.2       | -0.01345 | 0.793325 | 0.85728  |
| KIF13B    | 8p12         | 0.013448 | 0.793328 | 0.85728  |
| KIAA1324  | 1p13.3       | -0.01344 | 0.79346  | 0.857377 |
| FAM238A   | 10p12.1      | -0.01344 | 0.793519 | 0.857394 |
| GPATCH8   | 17q21.31     | 0.013413 | 0.793852 | 0.857707 |
| CCDC43    | 17q21.31     | -0.0134  | 0.794029 | 0.857839 |
| MGC16142  | -            | 0.013399 | 0.794059 | 0.857839 |
| SAMD3     | 6q23.1       | -0.01336 | 0.794605 | 0.858383 |
| DGKK      | Xp11.22      | 0.01336  | 0.794652 | 0.858387 |
| ABCC6P1   | 16p12.3      | -0.01335 | 0.794799 | 0.8585   |
| WDTC1     | 1p36.11      | -0.01335 | 0.794861 | 0.85852  |
| ARHGAP12  | 10p11.22     | -0.01334 | 0.794909 | 0.858526 |
| TLE3      | 15q23        | -0.01333 | 0.795032 | 0.858613 |
| CORO1B    | 11q13.2      | 0.013328 | 0.795129 | 0.858671 |
| MDM1      | 12q15        | 0.013325 | 0.795178 | 0.858677 |
| RINT1     | 7q22.3       | 0.0133   | 0.795557 | 0.85904  |
| NOS3      | 7q36.1       | -0.0133  | 0.795615 | 0.859056 |
| CREBBP    | 16p13.3      | 0.013292 | 0.795676 | 0.859076 |
| PAF1      | 19q13.2      | 0.013281 | 0.795838 | 0.859166 |
| SCGB3A2   | 5q32         | 0.013278 | 0.795887 | 0.859166 |
| APC       | 5q22.2       | 0.013278 | 0.795888 | 0.859166 |
| OR51M1    | 11p15.4      | 0.013252 | 0.796278 | 0.85954  |
| LINC00320 | 21q21.1      | -0.01324 | 0.796445 | 0.859629 |
| LINC00314 | 21q21.3      | 0.013241 | 0.796445 | 0.859629 |
| C10ORF55  | 10q22.2      | -0.01324 | 0.79649  | 0.859631 |
| DEFB125   | 20p13        | -0.01323 | 0.796606 | 0.859709 |

|            |          |          |          |          |
|------------|----------|----------|----------|----------|
| SYK        | 9q22.2   | 0.013216 | 0.796819 | 0.859893 |
| RAP2C      | Xq26.2   | -0.01321 | 0.796919 | 0.859955 |
| LMAN2      | 5q35.3   | -0.0132  | 0.79702  | 0.860017 |
| SSX2IP     | 1p22.3   | -0.0132  | 0.79713  | 0.860089 |
| OSBPL10    | 3p23     | -0.01318 | 0.797392 | 0.860326 |
| FRMD8      | 11q13.1  | -0.01316 | 0.797651 | 0.860559 |
| FBXL21P    | 5q31.1   | 0.013149 | 0.797817 | 0.860692 |
| WDR13      | Xp11.23  | 0.013139 | 0.797968 | 0.860809 |
| PSAPL1     | 4p16.1   | -0.01312 | 0.798264 | 0.861081 |
| SHARPIN    | 8q24.3   | 0.013113 | 0.798364 | 0.861142 |
| ZSWIM2     | 2q32.1   | -0.01311 | 0.79848  | 0.861221 |
| LINC01205  | 3q13.13  | -0.01309 | 0.798769 | 0.861486 |
| DEFB103A   | 8p23.1   | -0.01307 | 0.798945 | 0.86163  |
| CYP2A13    | 19q13.2  | 0.013071 | 0.799005 | 0.861649 |
| SPATA31D5P | 9q21.32  | 0.013059 | 0.799179 | 0.861748 |
| RPSA       | 3p22.1   | -0.01306 | 0.799183 | 0.861748 |
| PMCHL1     | 5p14.3   | 0.013047 | 0.799366 | 0.861899 |
| ATP6V0A2   | 12q24.31 | 0.013032 | 0.799578 | 0.862061 |
| VMP1       | 17q23.1  | -0.01303 | 0.799646 | 0.862061 |
| SNORA2B    | 12q13.11 | 0.013024 | 0.799701 | 0.862061 |
| CES2       | 16q22.1  | -0.01302 | 0.799708 | 0.862061 |
| FAM187B    | 19q13.12 | 0.013022 | 0.799731 | 0.862061 |
| FABP2      | 4q26     | -0.01301 | 0.799854 | 0.862146 |
| CEP57      | 11q21    | 0.012988 | 0.800246 | 0.862522 |
| PER3       | 1p36.23  | 0.012972 | 0.800489 | 0.862738 |
| LINC00602  | 6q27     | -0.01295 | 0.800803 | 0.86303  |
| ACTR5      | 20q11.23 | -0.01293 | 0.80118  | 0.863389 |
| SPAG11B    | 8p23.1   | -0.01292 | 0.801305 | 0.863478 |
| AJUBA      | 14q11.2  | -0.01291 | 0.801387 | 0.86352  |
| UPB1       | 22q11.23 | -0.01289 | 0.801661 | 0.863769 |
| XAGE3      | Xp11.22  | -0.01289 | 0.801782 | 0.863853 |
| CYP4F11    | 19p13.12 | 0.012874 | 0.801961 | 0.863999 |
| PRSS33     | 16p13.3  | 0.012857 | 0.802216 | 0.864227 |
| APOBEC3A   | 22q13.1  | 0.012847 | 0.802366 | 0.864343 |
| C19ORF33   | 19q13.2  | 0.012838 | 0.802503 | 0.864443 |
| TAL2       | 9q31.2   | 0.012823 | 0.802737 | 0.864648 |
| HSPA7      | 1q23.3   | 0.012818 | 0.802811 | 0.864682 |
| TSNAXIP1   | 16q22.1  | 0.012806 | 0.802991 | 0.864829 |
| TCTN2      | 12q24.31 | -0.01279 | 0.803174 | 0.864974 |
| MS4A6E     | 11q12.2  | -0.01279 | 0.803242 | 0.864974 |
| UBFD1      | 16p12.2  | 0.012788 | 0.803255 | 0.864974 |
| CLDN3      | 7q11.23  | 0.012784 | 0.803314 | 0.864991 |
| PPY2P      | 17q11.2  | -0.01278 | 0.803362 | 0.864996 |
| MECP2      | Xq28     | 0.012774 | 0.803476 | 0.865067 |
| PTPRE      | 10q26.2  | -0.01277 | 0.803541 | 0.865067 |
| CYTOR      | 2p11.2   | -0.01277 | 0.803557 | 0.865067 |
| TIGD4      | 4q31.3   | 0.012763 | 0.80363  | 0.865099 |
| DCDC1      | 11p13    | -0.01276 | 0.803687 | 0.865114 |
| KCNK16     | 6p21.2   | -0.01275 | 0.803871 | 0.865265 |
| TULP1      | 6p21.31  | -0.01274 | 0.80396  | 0.865314 |
| CATSPERG   | 19q13.2  | -0.01272 | 0.804231 | 0.86556  |
| FSD2       | 15q25.2  | 0.012717 | 0.804332 | 0.865584 |
| OTOL1      | 3q26.1   | -0.01272 | 0.804343 | 0.865584 |
| MMACHC     | 1p34.1   | 0.012713 | 0.804388 | 0.865584 |
| SYT7       | 11q12.2  | -0.01271 | 0.804427 | 0.865584 |
| USP16      | 21q21.3  | -0.01271 | 0.804472 | 0.865587 |
| ANKEF1     | 20p12.2  | -0.0127  | 0.804534 | 0.865606 |
| GLUD2      | Xq24     | -0.01269 | 0.804696 | 0.865733 |



|             |          |          |          |          |
|-------------|----------|----------|----------|----------|
| CEMIP       | 15q25.1  | -0.01269 | 0.804738 | 0.865733 |
| MTRF1       | 13q14.11 | 0.012687 | 0.804784 | 0.865736 |
| SLC12A5     | 20q13.12 | 0.012677 | 0.804931 | 0.865848 |
| C19ORF18    | 19q13.43 | -0.01266 | 0.805153 | 0.86604  |
| PQBP1       | Xp11.23  | -0.01265 | 0.805284 | 0.866134 |
| PGPEP1L     | 15q26.3  | -0.01264 | 0.80542  | 0.866148 |
| DUSP2       | 2q11.2   | 0.012644 | 0.805426 | 0.866148 |
| HIST1H1A    | 6p22.2   | -0.01264 | 0.805427 | 0.866148 |
| FAAP24      | 19q13.11 | 0.012604 | 0.806029 | 0.866728 |
| GRM2        | 3p21.2   | -0.0126  | 0.806083 | 0.866728 |
| LINC00261   | 20p11.21 | 0.0126   | 0.806095 | 0.866728 |
| CELF3       | 1q21.3   | 0.012586 | 0.806301 | 0.866902 |
| EGFR        | 7p11.2   | 0.012565 | 0.806625 | 0.867204 |
| TTY2        | Yp11.2   | -0.01255 | 0.806809 | 0.867355 |
| SBDSP1      | 7q11.23  | 0.012528 | 0.807178 | 0.867636 |
| STOX1       | 10q22.1  | -0.01253 | 0.80719  | 0.867636 |
| TPH1        | 11p15.1  | -0.01253 | 0.807214 | 0.867636 |
| DYTN        | 2q33.3   | 0.012524 | 0.807243 | 0.867636 |
| OR7E5P      | 11q12.1  | 0.012472 | 0.808029 | 0.868434 |
| P2RX5       | 17p13.2  | -0.01246 | 0.808164 | 0.868533 |
| ME3         | 11q14.2  | -0.01243 | 0.808613 | 0.868968 |
| TPRA1       | 3q21.3   | 0.012421 | 0.808801 | 0.869124 |
| GOLGA6L1    | 15q11.2  | 0.012406 | 0.809015 | 0.869307 |
| PRAMEF6     | 1p36.21  | 0.012398 | 0.809137 | 0.86936  |
| C7ORF33     | 7q36.1   | -0.0124  | 0.809151 | 0.86936  |
| ZNF799      | 19p13.2  | 0.012395 | 0.809195 | 0.86936  |
| DOCK9       | 13q32.3  | -0.01237 | 0.809549 | 0.869691 |
| TSNAX-DISC1 | 1q42.2   | 0.012368 | 0.809597 | 0.869691 |
| BLOC1S1     | 12q13.2  | 0.012363 | 0.809676 | 0.869691 |
| ITPKB       | 1q42.12  | -0.01236 | 0.809682 | 0.869691 |
| NIPBL       | 5p13.2   | 0.012358 | 0.809747 | 0.869691 |
| ZBTB8A      | 1p35.1   | 0.012357 | 0.809763 | 0.869691 |
| MSLN        | 16p13.3  | -0.01234 | 0.809997 | 0.86986  |
| NUP160      | 11p11.2  | 0.012341 | 0.810007 | 0.86986  |
| KLK9        | 19q13.41 | 0.012336 | 0.810085 | 0.869871 |
| KLKB1       | 4q35.2   | -0.01233 | 0.810105 | 0.869871 |
| PURB        | 7p13     | -0.01233 | 0.81017  | 0.869894 |
| DNAJB1      | 19p13.12 | -0.01232 | 0.810306 | 0.869961 |
| PRNT        | 20p13    | 0.01232  | 0.810323 | 0.869961 |
| TRIP12      | 2q36.3   | -0.01231 | 0.810404 | 0.869961 |
| CHD3        | 17p13.1  | 0.012314 | 0.810414 | 0.869961 |
| SDC4P       | 22q12.2  | -0.01231 | 0.810449 | 0.869961 |
| CADPS       | 3p14.2   | 0.012306 | 0.810531 | 0.870002 |
| EPGN        | 4q13.3   | -0.0123  | 0.810685 | 0.870121 |
| ZBTB11      | 3q12.3   | 0.012276 | 0.810983 | 0.870394 |
| FOXR1       | 11q23.3  | 0.012273 | 0.811029 | 0.870397 |
| GADD45G     | 9q22.2   | -0.01226 | 0.811217 | 0.870552 |
| ODF4        | 17p13.1  | 0.012252 | 0.811351 | 0.870649 |
| PHLDA1      | 12q21.2  | -0.01224 | 0.811493 | 0.870712 |
| REG1CP      | 2p12     | 0.012242 | 0.811503 | 0.870712 |
| TWF1        | 12q12    | -0.01224 | 0.811558 | 0.870712 |
| SHANK3      | 22q13.33 | -0.01223 | 0.811627 | 0.870712 |
| DIS3        | 13q21.33 | -0.01223 | 0.811627 | 0.870712 |
| SDE2        | 1q42.12  | -0.01223 | 0.811705 | 0.870749 |
| ADAM9       | 8p11.22  | -0.01221 | 0.811916 | 0.870929 |
| PCCB        | 3q22.3   | 0.012205 | 0.812056 | 0.871033 |
| OR13F1      | 9q31.1   | 0.012193 | 0.812235 | 0.871135 |
| XYLT2       | 17q21.33 | -0.01219 | 0.812238 | 0.871135 |

|           |               |          |          |          |
|-----------|---------------|----------|----------|----------|
| MYH8      | 17p13.1       | -0.01219 | 0.812316 | 0.871171 |
| NCR1      | 19q13.42      | 0.012169 | 0.812598 | 0.871426 |
| C22ORF15  | 22q11.23      | -0.01217 | 0.81264  | 0.871426 |
| TMEM8B    | 9p13.3        | -0.01216 | 0.812736 | 0.871482 |
| WDR43     | 2p23.2        | 0.012156 | 0.812804 | 0.871508 |
| SECTM1    | 17q25.3       | -0.01215 | 0.812876 | 0.871539 |
| PAR6B     | 20q13.13      | -0.01213 | 0.813149 | 0.871785 |
| CKAP4     | 12q23.3       | 0.012116 | 0.813406 | 0.872014 |
| CRKL      | 22q11.21      | -0.01209 | 0.813826 | 0.872417 |
| ANK3      | 10q21.2       | -0.01208 | 0.813875 | 0.872423 |
| OR51F1    | 11p15.4       | 0.012067 | 0.814149 | 0.872596 |
| OR5M11    | 11q12.1       | 0.012065 | 0.814169 | 0.872596 |
| THOC5     | 22q12.2       | -0.01206 | 0.814207 | 0.872596 |
| PGPEP1    | 19p13.11      | -0.01206 | 0.81421  | 0.872596 |
| CCNC      | 6q16.2        | 0.012057 | 0.814295 | 0.87264  |
| RPP25L    | 9p13.3        | 0.012044 | 0.814487 | 0.872794 |
| SMARCC1   | 3p21.31       | 0.012042 | 0.814526 | 0.872794 |
| GABRB2    | 5q34          | 0.012025 | 0.814777 | 0.87299  |
| SNRNP40   | 1p35.2        | 0.012024 | 0.814796 | 0.87299  |
| KRTAP10-9 | 21q22.3       | -0.01201 | 0.814993 | 0.873154 |
| TENT5D    | Xq21.1        | -0.01199 | 0.815254 | 0.873363 |
| LY6G5C    | 6p21.33       | 0.011991 | 0.815301 | 0.873363 |
| ZNF221    | 19q13.31      | 0.011989 | 0.815324 | 0.873363 |
| CLK4      | 5q35.3        | 0.011986 | 0.815363 | 0.873363 |
| ALG14     | 1p21.3        | -0.01198 | 0.815418 | 0.873376 |
| ZMIZ1-AS1 | 10q22.3       | -0.01198 | 0.815474 | 0.873389 |
| NFATC4    | 14q12         | 0.011968 | 0.815643 | 0.873523 |
| SLC22A14  | 3p22.2        | 0.01196  | 0.815768 | 0.873611 |
| RHD       | 1p36.11       | 0.011936 | 0.816121 | 0.873942 |
| PHC3      | 3q26.2        | -0.01193 | 0.816177 | 0.873955 |
| HID1      | 17q25.1       | 0.011903 | 0.816624 | 0.874386 |
| SNORA22   | 7q11.21       | -0.01188 | 0.816924 | 0.874661 |
| B3GAT3    | 11q12.3       | 0.011867 | 0.817177 | 0.874862 |
| TIRAP     | 11q24.2       | -0.01187 | 0.817199 | 0.874862 |
| F2RL1     | 5q13.3        | 0.01185  | 0.817428 | 0.875061 |
| KCNK18    | 10q25.3       | 0.011847 | 0.817474 | 0.875062 |
| HRH3      | 20q13.33      | -0.01184 | 0.817537 | 0.875083 |
| ESPNP     | 1p36.13       | 0.011836 | 0.81764  | 0.875147 |
| ISL1      | 5q11.1        | 0.011817 | 0.817928 | 0.875408 |
| TDRD10    | 1q21.3        | -0.01181 | 0.818011 | 0.875451 |
| MED20     | 6p21.1        | -0.01181 | 0.818077 | 0.875468 |
| MAP3K15   | Xp22.12       | -0.0118  | 0.818121 | 0.875468 |
| ERRFI1    | 1p36.23       | 0.011802 | 0.818158 | 0.875468 |
| LRRC27    | 10q26.3       | 0.011798 | 0.81822  | 0.875482 |
| LOC143188 | 10q25.2       | 0.011795 | 0.818259 | 0.875482 |
| FAM219B   | 15q24.1-q24.2 | 0.011792 | 0.818311 | 0.875485 |
| OXSM      | 3p24.2        | 0.011788 | 0.818364 | 0.875485 |
| KLHL30    | 2q37.3        | -0.01179 | 0.818393 | 0.875485 |
| ACSS1     | 20p11.21      | -0.01178 | 0.81853  | 0.875585 |
| TMEM229A  | 7q31.32       | -0.01177 | 0.818591 | 0.875603 |
| MC3R      | 20q13.2       | -0.01176 | 0.818726 | 0.875688 |
| PARP9     | 3q21.1        | 0.011762 | 0.818758 | 0.875688 |
| ANKRD49   | 11q21         | -0.01176 | 0.818833 | 0.875722 |
| RALBP1    | 18p11.22      | -0.01175 | 0.818957 | 0.875808 |
| LINC01565 | 3q21.3        | -0.01174 | 0.819112 | 0.875927 |
| LIN37     | 19q13.12      | 0.011731 | 0.819234 | 0.875997 |
| SLC2A2    | 3q26.2        | -0.01173 | 0.819298 | 0.875997 |
| EIF4E     | 4q23          | -0.01173 | 0.819309 | 0.875997 |

|             |          |          |          |          |
|-------------|----------|----------|----------|----------|
| PGBD4       | 15q14    | -0.01172 | 0.819381 | 0.876027 |
| ELOB        | 16p13.3  | -0.0117  | 0.819632 | 0.876249 |
| ANKRD20A20P | 9q13     | 0.0117   | 0.819704 | 0.87627  |
| YTHDC1      | 4q13.2   | -0.0117  | 0.819739 | 0.87627  |
| STK32C      | 10q26.3  | -0.01169 | 0.819832 | 0.876323 |
| DNAH10      | 12q24.31 | -0.01167 | 0.820083 | 0.876515 |
| SLC4A4      | 4q13.3   | -0.01167 | 0.820106 | 0.876515 |
| ACOT13      | 6p22.3   | 0.011671 | 0.820144 | 0.876515 |
| SPIN2B      | Xp11.21  | 0.011665 | 0.820235 | 0.876566 |
| CAPN9       | 1q42.2   | -0.01166 | 0.820287 | 0.876575 |
| CA12        | 15q22.2  | -0.01164 | 0.820656 | 0.876874 |
| GUSBP1      | 5p14.3   | -0.01163 | 0.820705 | 0.876874 |
| TANGO6      | 16q22.1  | -0.01163 | 0.820757 | 0.876874 |
| POLR2L      | 11p15.5  | 0.011626 | 0.820812 | 0.876874 |
| B4GALT6     | 18q12.1  | 0.011625 | 0.820832 | 0.876874 |
| CTAG1B      | Xq28     | -0.01162 | 0.820841 | 0.876874 |
| HGD         | 3q13.33  | 0.011621 | 0.820891 | 0.876874 |
| FLJ13224    | 12p11.21 | -0.01162 | 0.820917 | 0.876874 |
| AIFM3       | 22q11.21 | 0.011602 | 0.821191 | 0.877119 |
| MMP1        | 11q22.2  | -0.0116  | 0.821259 | 0.877146 |
| POLDIP3     | 22q13.2  | -0.01157 | 0.821644 | 0.87751  |
| NRN1        | 6p25.1   | 0.011558 | 0.821843 | 0.877676 |
| ZNF876P     | 4p16.3   | -0.01154 | 0.822099 | 0.877868 |
| LBX1        | 10q24.32 | -0.01154 | 0.822123 | 0.877868 |
| CCR9        | 3p21.31  | -0.01154 | 0.822154 | 0.877868 |
| NAT8B       | 2p13.1   | 0.01152  | 0.822426 | 0.87811  |
| ERH         | 14q24.1  | 0.01151  | 0.822584 | 0.878228 |
| CDC16       | 13q34    | -0.01151 | 0.822623 | 0.878228 |
| NECTIN1     | 11q23.3  | -0.0115  | 0.822714 | 0.878278 |
| CYLC1       | Xq21.1   | 0.011483 | 0.822984 | 0.878478 |
| NKX2-4      | 20p11.22 | 0.011481 | 0.823011 | 0.878478 |
| ASXL3       | 18q12.1  | -0.01148 | 0.823033 | 0.878478 |
| PSMC1       | 14q32.11 | 0.011473 | 0.823139 | 0.878544 |
| PCMT1       | 6q25.1   | -0.01146 | 0.823364 | 0.878737 |
| PIP5KL1     | 9q34.11  | 0.011444 | 0.823574 | 0.878915 |
| SCAP        | 3p21.31  | 0.011436 | 0.823697 | 0.878999 |
| LCE1F       | 1q21.3   | 0.011429 | 0.823804 | 0.879049 |
| GTF2IRD1P1  | 7q11.21  | 0.011425 | 0.823867 | 0.879049 |
| LOC641367   | 19p12    | 0.011423 | 0.823894 | 0.879049 |
| ADAMTS19    | 5q23.3   | -0.01142 | 0.823919 | 0.879049 |
| SLC35F6     | 2p23.3   | -0.01141 | 0.824118 | 0.879214 |
| CEBPZ       | 2p22.2   | 0.011395 | 0.824314 | 0.879376 |
| PARD6A      | 16q22.1  | 0.011377 | 0.824595 | 0.879629 |
| GDPD2       | Xq13.1   | 0.011373 | 0.824653 | 0.879644 |
| ITM2C       | 2q37.1   | 0.011351 | 0.82499  | 0.879957 |
| SNX30       | 9q32     | 0.011347 | 0.825052 | 0.879976 |
| GPN3        | 12q24.11 | -0.01134 | 0.825124 | 0.880006 |
| THAP7-AS1   | 22q11.21 | 0.011333 | 0.825264 | 0.880098 |
| KRT37       | 17q21.2  | -0.01133 | 0.825321 | 0.880098 |
| LRTM2       | 12p13.33 | 0.011328 | 0.825342 | 0.880098 |
| BICRAL      | 6p21.1   | -0.01131 | 0.825627 | 0.880355 |
| ERICH4      | 19q13.2  | -0.0113  | 0.825766 | 0.880456 |
| FAM99B      | 11p15.5  | -0.01129 | 0.82592  | 0.880574 |
| TRIM60      | 4q32.3   | -0.01128 | 0.826124 | 0.880744 |
| LINC00895   | 22q11.21 | -0.01126 | 0.826304 | 0.880889 |
| LINC01098   | 4q34.3   | 0.011255 | 0.82645  | 0.880998 |
| ZFP91       | 11q12.1  | -0.01125 | 0.826528 | 0.881035 |
| REG1B       | 2p12     | -0.01125 | 0.826591 | 0.881055 |

|           |              |          |          |          |
|-----------|--------------|----------|----------|----------|
| PRAMEF14  | 1p36.21      | 0.011235 | 0.826743 | 0.88117  |
| ENPP7     | 17q25.3      | -0.01123 | 0.826806 | 0.881191 |
| ITLN1     | 1q23.3       | -0.01123 | 0.826879 | 0.881221 |
| KRTAP17-1 | 17q21.2      | -0.01122 | 0.826936 | 0.881235 |
| GTF2A1    | 14q31.1      | -0.01122 | 0.827022 | 0.881243 |
| IFRD1     | 7q31.1       | -0.01122 | 0.827031 | 0.881243 |
| EMG1      | 12p13.31     | 0.011207 | 0.827172 | 0.881346 |
| IGF2BP2   | 3q27.2       | 0.011192 | 0.827407 | 0.881549 |
| CNDP2     | 18q22.3      | 0.011184 | 0.827528 | 0.881631 |
| AWAT1     | Xq13.1       | 0.011179 | 0.827602 | 0.881663 |
| SCRN2     | 17q21.32     | -0.01116 | 0.827858 | 0.881889 |
| MRPS9     | 2q12.1       | 0.011147 | 0.828077 | 0.882075 |
| DSTYK     | 1q32.1       | 0.011138 | 0.828224 | 0.882185 |
| RORC      | 1q21.3       | 0.011133 | 0.828296 | 0.882215 |
| SASH1     | 6q24.3-q25.1 | 0.011126 | 0.828397 | 0.882276 |
| C3ORF49   | 3p14.1       | -0.01112 | 0.828561 | 0.882398 |
| TRPT1     | 11q13.1      | -0.01111 | 0.8286   | 0.882398 |
| HHEX      | 10q23.33     | -0.0111  | 0.828871 | 0.88264  |
| PSMA3     | 14q23.1      | 0.011084 | 0.829035 | 0.882767 |
| DIS3L     | 15q22.31     | 0.011081 | 0.829081 | 0.882769 |
| SLC25A24  | 1p13.3       | -0.01106 | 0.829447 | 0.883112 |
| TBX2      | 17q23.2      | -0.01105 | 0.829591 | 0.883167 |
| KRTAP4-2  | 17q21.2      | -0.01105 | 0.829608 | 0.883167 |
| PELI3     | 11q13.2      | -0.01105 | 0.829633 | 0.883167 |
| QRFPR     | 4q27         | -0.01104 | 0.829675 | 0.883167 |
| ZNF443    | 19p13.2      | -0.01104 | 0.829777 | 0.883229 |
| SMU1      | 9p21.1       | 0.011032 | 0.829833 | 0.883241 |
| EDEM1     | 3p26.1       | -0.01102 | 0.830003 | 0.883375 |
| IFNL3     | 19q13.2      | -0.011   | 0.830287 | 0.883631 |
| SLC12A2   | 5q23.3       | 0.010988 | 0.8305   | 0.883777 |
| PRKAG3    | 2q35         | 0.010987 | 0.830513 | 0.883777 |
| PLAGL1    | 6q24.2       | -0.01096 | 0.830928 | 0.884141 |
| ALB       | 4q13.3       | -0.01096 | 0.830943 | 0.884141 |
| COA4      | 11q13.4      | 0.010951 | 0.831059 | 0.884217 |
| PML       | 15q24.1      | -0.01094 | 0.831213 | 0.884334 |
| LINC01020 | 5p15.32      | 0.010918 | 0.831566 | 0.884616 |
| RAB9BP1   | 5q21.2-q21.3 | -0.01092 | 0.831566 | 0.884616 |
| MAGEB10   | Xp21.3       | -0.01091 | 0.831633 | 0.88464  |
| PRLR      | 5p13.2       | -0.0109  | 0.83189  | 0.884866 |
| PPP1CA    | 11q13.2      | -0.01088 | 0.832103 | 0.885045 |
| C17ORF67  | 17q22        | -0.01087 | 0.83223  | 0.885134 |
| FSCB      | 14q21.2      | 0.010867 | 0.832337 | 0.885201 |
| ZFX       | Xp22.11      | -0.01086 | 0.832394 | 0.885214 |
| PLA2G2F   | 1p36.12      | -0.01084 | 0.832758 | 0.885554 |
| RAET1G    | 6q25.1       | -0.01083 | 0.83295  | 0.88571  |
| NHEG1     | 6q23.3       | 0.010822 | 0.833026 | 0.88571  |
| KITLG     | 12q21.32     | 0.010818 | 0.833078 | 0.88571  |
| LRP11     | 6q25.1       | 0.010818 | 0.833081 | 0.88571  |
| DDX60     | 4q32.3       | 0.010806 | 0.833265 | 0.88582  |
| SNORA80A  | 21q22.11     | -0.0108  | 0.833303 | 0.88582  |
| ROBO3     | 11q24.2      | -0.0108  | 0.833341 | 0.88582  |
| GOT1L1    | 8p11.23      | 0.0108   | 0.833362 | 0.88582  |
| GALNT8    | 12p13.32     | 0.010794 | 0.833451 | 0.885868 |
| CCNYL1    | 2q33.3       | 0.010783 | 0.833611 | 0.885915 |
| FOXR2     | Xp11.21      | 0.010781 | 0.833651 | 0.885915 |
| POC1B     | 12q21.33     | -0.01078 | 0.833657 | 0.885915 |
| NRDE2     | 14q32.11     | -0.01078 | 0.833677 | 0.885915 |
| GRB10     | 7p12.1       | 0.010776 | 0.833716 | 0.885915 |

|            |              |          |          |          |
|------------|--------------|----------|----------|----------|
| LIN7B      | 19q13.33     | -0.01077 | 0.833795 | 0.885951 |
| SLC35B4    | 7q33         | -0.01077 | 0.833873 | 0.885988 |
| ABCB9      | 12q24.31     | -0.01071 | 0.834662 | 0.886779 |
| NUTM2A-AS1 | 10q23.2      | 0.01065  | 0.835632 | 0.887762 |
| LOC646762  | 7p14.3       | 0.010647 | 0.835678 | 0.887763 |
| COX20      | 1q44         | -0.01063 | 0.835966 | 0.887983 |
| FABP9      | 8q21.13      | 0.010628 | 0.835973 | 0.887983 |
| CDC73      | 1q31.2       | 0.01062  | 0.8361   | 0.888027 |
| MICALCL    | 11p15.3      | 0.010619 | 0.836103 | 0.888027 |
| PCGF1      | 2p13.1       | 0.010608 | 0.836283 | 0.888171 |
| CLDN7      | 17p13.1      | 0.0106   | 0.836392 | 0.888198 |
| GFI1B      | 9q34.13      | 0.010598 | 0.836428 | 0.888198 |
| FAM47A     | Xp21.1       | -0.0106  | 0.83647  | 0.888198 |
| FNTB       | 14q23.3      | 0.010593 | 0.836503 | 0.888198 |
| CLRN2      | 4p15.32      | -0.01059 | 0.836572 | 0.888198 |
| ZNF28      | 19q13.41     | 0.010588 | 0.836575 | 0.888198 |
| POU4F1     | 13q31.1      | 0.010584 | 0.836642 | 0.888222 |
| SIX6       | 14q23.1      | -0.01058 | 0.836694 | 0.88823  |
| LINC02593  | 1p36.33      | -0.01056 | 0.83705  | 0.888561 |
| BAGE       | 21p11.1      | -0.01053 | 0.837419 | 0.888906 |
| RSF1       | 11q14.1      | 0.010515 | 0.837689 | 0.889146 |
| GATA4      | 8p23.1       | -0.0105  | 0.837971 | 0.889371 |
| TARBP2     | 12q13.13     | -0.0105  | 0.837991 | 0.889371 |
| DDX60L     | 4q32.3       | -0.01048 | 0.838181 | 0.889526 |
| LRP3       | 19q13.11     | 0.010442 | 0.838798 | 0.890077 |
| SRPRB      | 3q22.1       | -0.01044 | 0.838833 | 0.890077 |
| TG         | 8q24.22      | -0.01044 | 0.838833 | 0.890077 |
| KRTAP13-2  | 21q22.11     | 0.010436 | 0.838898 | 0.890083 |
| KRTDAP     | 19q13.12     | -0.01043 | 0.838928 | 0.890083 |
| PIK3R3     | 1p34.1       | 0.010419 | 0.839157 | 0.890279 |
| DLX1       | 2q31.1       | -0.0104  | 0.839388 | 0.890442 |
| BRAF       | 7q34         | -0.0104  | 0.839449 | 0.890442 |
| KLRC1      | 12p13.2      | -0.0104  | 0.839454 | 0.890442 |
| TET2       | 4q24         | -0.0104  | 0.839488 | 0.890442 |
| PITPNC1    | 17q24.2      | -0.01039 | 0.83958  | 0.890492 |
| OR7G2      | 19p13.2      | -0.01039 | 0.83966  | 0.890529 |
| DENND2D    | 1p13.3-p13.2 | 0.010367 | 0.839951 | 0.890791 |
| RPL9       | 4p14         | -0.01035 | 0.840161 | 0.890929 |
| OR10G2     | 14q11.2      | 0.010349 | 0.840226 | 0.890929 |
| DLGAP3     | 1p34.3       | 0.010348 | 0.840239 | 0.890929 |
| TTC38      | 22q13.31     | -0.01035 | 0.840259 | 0.890929 |
| CAPNS1     | 19q13.12     | -0.01033 | 0.840502 | 0.891139 |
| CUL1       | 7q36.1       | -0.01032 | 0.840607 | 0.891166 |
| ZG16       | 16p11.2      | -0.01032 | 0.840616 | 0.891166 |
| IREB2      | 15q25.1      | 0.010314 | 0.840751 | 0.89122  |
| COX4I1     | 16q24.1      | 0.010313 | 0.840764 | 0.89122  |
| IL1B       | 2q14.1       | 0.010311 | 0.8408   | 0.89122  |
| RXFP2      | 13q13.1      | -0.01031 | 0.840879 | 0.891256 |
| ZNF80      | 3q13.31      | -0.01026 | 0.841577 | 0.891949 |
| OR2C1      | 16p13.3      | 0.010244 | 0.841823 | 0.892115 |
| B3GNT6     | 11q13.5      | -0.01024 | 0.841873 | 0.892115 |
| IL22       | 12q15        | 0.010239 | 0.841893 | 0.892115 |
| SIX2       | 2p21         | 0.010238 | 0.841912 | 0.892115 |
| NDUFA3     | 19q13.42     | 0.010233 | 0.841994 | 0.892155 |
| PRDX1      | 1p34.1       | -0.01021 | 0.842279 | 0.89241  |
| SNU13      | 22q13.2      | -0.01021 | 0.842381 | 0.89247  |
| PNLDC1     | 6q25.3       | -0.0102  | 0.84244  | 0.892473 |
| MYDGF      | 19p13.3      | 0.010201 | 0.842473 | 0.892473 |

|            |              |          |          |          |
|------------|--------------|----------|----------|----------|
| AIM2       | 1q23.1-q23.2 | -0.01019 | 0.842622 | 0.892583 |
| MPLKIP     | 7p14.1       | -0.01017 | 0.842886 | 0.892817 |
| AXDND1     | 1q25.2       | 0.010161 | 0.843082 | 0.892977 |
| RNMT       | 18p11.21     | -0.01015 | 0.843218 | 0.89304  |
| ETV5       | 3q27.2       | -0.01015 | 0.843231 | 0.89304  |
| KRTAP8-1   | 21q22.11     | -0.01015 | 0.843307 | 0.893055 |
| OR10H5     | 19p13.12     | -0.01014 | 0.843376 | 0.893055 |
| LINC00207  | 22q13.31     | -0.01014 | 0.843379 | 0.893055 |
| USP27X     | Xp11.23      | -0.01013 | 0.843576 | 0.893211 |
| AKAP4      | Xp11.22      | 0.010126 | 0.843615 | 0.893211 |
| FER1L6     | 8q24.13      | -0.01012 | 0.843711 | 0.893264 |
| CARHSP1    | 16p13.2      | -0.01011 | 0.843799 | 0.893311 |
| ARFRP1     | 20q13.33     | 0.010107 | 0.84391  | 0.893382 |
| FAM99A     | 11p15.5      | 0.010104 | 0.843961 | 0.893387 |
| SUPT6H     | 17q11.2      | -0.01009 | 0.84412  | 0.893509 |
| ATP5F1A    | 18q21.1      | 0.010089 | 0.844179 | 0.893525 |
| ZNF204P    | 6p22.1       | 0.01008  | 0.844317 | 0.893623 |
| RNF20      | 9q31.1       | 0.010066 | 0.844527 | 0.893779 |
| OR10J1     | 1q23.2       | -0.01006 | 0.844573 | 0.893779 |
| BTBD17     | 17q25.1      | 0.010062 | 0.844598 | 0.893779 |
| ACER1      | 19p13.3      | -0.01005 | 0.844805 | 0.893945 |
| ERG28      | 14q24.3      | -0.01005 | 0.844844 | 0.893945 |
| ADAMTS20   | 12q12        | -0.01001 | 0.845362 | 0.894445 |
| HIST1H2BA  | 6p22.2       | 0.010004 | 0.845476 | 0.894519 |
| CT47A11    | Xq24         | 0.009989 | 0.845714 | 0.894723 |
| OR4D6      | 11q12.1      | -0.00998 | 0.845894 | 0.894812 |
| C15ORF61   | 15q23        | -0.00998 | 0.845916 | 0.894812 |
| CLEC4GP1   | 19p13.2      | 0.009974 | 0.845931 | 0.894812 |
| CYSRT1     | 9q34.3       | 0.009962 | 0.84612  | 0.894963 |
| RDH8       | 19p13.2      | 0.009955 | 0.846223 | 0.895026 |
| STK31      | 7p15.3       | -0.00992 | 0.846763 | 0.89555  |
| OACYLP     | 18q21.32     | 0.009908 | 0.846944 | 0.895662 |
| MAP3K7     | 6q15         | -0.00991 | 0.846977 | 0.895662 |
| QDPR       | 4p15.32      | 0.009904 | 0.847003 | 0.895662 |
| ZNF805     | 19q13.43     | -0.0099  | 0.847095 | 0.895712 |
| TTYH1      | 19q13.42     | 0.009894 | 0.847161 | 0.895733 |
| DRAIC      | 15q23        | 0.009885 | 0.847299 | 0.895833 |
| MAPK8IP2   | 22q13.33     | 0.009826 | 0.848192 | 0.89673  |
| ITPRIPL1   | 2q11.2       | -0.0098  | 0.84858  | 0.897079 |
| ZNF527     | 19q13.12     | 0.009798 | 0.848629 | 0.897079 |
| LANCL3     | Xp21.1       | -0.00979 | 0.848682 | 0.897079 |
| TUFT1      | 1q21.3       | 0.009793 | 0.848702 | 0.897079 |
| EGR1       | 5q31.2       | 0.00977  | 0.849047 | 0.897396 |
| TSSC4      | 11p15.5      | -0.00974 | 0.849441 | 0.897766 |
| PCK2       | 14q11.2-q12  | -0.00974 | 0.849569 | 0.897854 |
| REG3A      | 2p12         | -0.00972 | 0.849816 | 0.898055 |
| PTH2       | 19q13.33     | 0.009718 | 0.849849 | 0.898055 |
| VCL        | 10q22.2      | -0.00971 | 0.849901 | 0.898062 |
| HYMAI      | 6q24.2       | 0.009698 | 0.850148 | 0.898276 |
| RPL4       | 15q22.31     | -0.00968 | 0.850355 | 0.898447 |
| FRMD4B     | 3p14.1       | -0.00966 | 0.850661 | 0.898653 |
| RNF217-AS1 | 6q22.31      | 0.009664 | 0.850662 | 0.898653 |
| BEND2      | Xp22.13      | -0.00966 | 0.850685 | 0.898653 |
| FKBP6      | 7q11.23      | -0.00966 | 0.850779 | 0.898669 |
| KRT2       | 12q13.13     | -0.00966 | 0.85079  | 0.898669 |
| INTS2      | 17q23.2      | 0.009651 | 0.850871 | 0.898708 |
| PPARGC1A   | 4p15.2       | 0.009638 | 0.851059 | 0.898858 |
| NR3C2      | 4q31.23      | -0.00962 | 0.851269 | 0.899033 |

|           |          |          |          |          |
|-----------|----------|----------|----------|----------|
| ULBP1     | 6q25.1   | -0.00961 | 0.851525 | 0.89912  |
| SPATA48   | 7p12.2   | -0.00961 | 0.85153  | 0.89912  |
| TMPRSS4   | 11q23.3  | -0.00961 | 0.851532 | 0.89912  |
| JADE1     | 4q28.2   | -0.00961 | 0.851562 | 0.89912  |
| OPRD1     | 1p35.3   | -0.0096  | 0.851576 | 0.89912  |
| HIGD1C    | 12q13.12 | 0.0096   | 0.851641 | 0.899142 |
| SLC25A43  | Xq24     | 0.009595 | 0.851726 | 0.899147 |
| MRPS22    | 3q23     | 0.009594 | 0.851736 | 0.899147 |
| RIMS3     | 1p34.2   | 0.009588 | 0.851821 | 0.89919  |
| OR2T2     | 1q44     | 0.009573 | 0.852065 | 0.899399 |
| CT47B1    | Xq24     | -0.00956 | 0.85225  | 0.899547 |
| ZNF468    | 19q13.41 | -0.00955 | 0.852423 | 0.899683 |
| ZNF513    | 2p23.3   | 0.009543 | 0.852512 | 0.899729 |
| KCNG4     | 16q24.1  | -0.00954 | 0.85259  | 0.899764 |
| KRTAP19-3 | 21q22.11 | 0.009524 | 0.852806 | 0.899944 |
| OR10S1    | 11q24.1  | -0.00951 | 0.852978 | 0.900079 |
| TTY4C     | Yq11.23  | 0.009498 | 0.853206 | 0.900272 |
| ABRACL    | 6q24.1   | -0.00949 | 0.853344 | 0.90037  |
| ALG1L2    | 3q22.1   | 0.00947  | 0.853629 | 0.900623 |
| ANKRD22   | 10q23.31 | 0.009459 | 0.853801 | 0.900758 |
| TLN1      | 9p13.3   | 0.009453 | 0.853897 | 0.900811 |
| DNAH5     | 5p15.2   | -0.00945 | 0.853943 | 0.900812 |
| TAB3      | Xp21.2   | -0.00944 | 0.854022 | 0.900848 |
| FOSL2     | 2p23.2   | 0.009428 | 0.854275 | 0.901068 |
| SALL1     | 16q12.1  | -0.00939 | 0.854785 | 0.901537 |
| PDZK1IP1  | 1p33     | -0.00939 | 0.854838 | 0.901537 |
| CACNA1I   | 22q13.1  | -0.00939 | 0.854855 | 0.901537 |
| KRR1      | 12q21.2  | -0.00938 | 0.854976 | 0.901579 |
| TRIM51    | 11q12.1  | 0.009381 | 0.854994 | 0.901579 |
| C20ORF141 | 20p13    | -0.00938 | 0.855045 | 0.901579 |
| TENT4B    | 16q12.1  | 0.009376 | 0.855075 | 0.901579 |
| KRTAP5-4  | 11p15.5  | 0.009366 | 0.855225 | 0.901685 |
| AGPAT1    | 6p21.32  | 0.009363 | 0.855266 | 0.901685 |
| ZFPL1     | 11q13.1  | 0.009358 | 0.855341 | 0.901717 |
| CMTM7     | 3p22.3   | -0.00935 | 0.85547  | 0.901805 |
| UCMA      | 10p13    | 0.009338 | 0.85565  | 0.901948 |
| OR12D2    | 6p22.1   | -0.00933 | 0.855754 | 0.902009 |
| OR4A47    | 11p11.2  | 0.009323 | 0.855873 | 0.902087 |
| CRYGA     | 2q33.3   | 0.009309 | 0.856087 | 0.90223  |
| IFNA4     | 9p21.3   | 0.009309 | 0.856099 | 0.90223  |
| ABHD2     | 15q26.1  | -0.00929 | 0.856385 | 0.902415 |
| OR2B3     | 6p22.1   | -0.00929 | 0.8564   | 0.902415 |
| MS4A10    | 11q12.2  | 0.009288 | 0.856409 | 0.902415 |
| HIST2H2BE | 1q21.2   | -0.00928 | 0.856536 | 0.902472 |
| CBLIF     | 11q12.1  | -0.00928 | 0.856554 | 0.902472 |
| LINC02685 | 11p11.2  | -0.00928 | 0.856598 | 0.902472 |
| GFI1      | 1p22.1   | -0.00925 | 0.85707  | 0.902921 |
| EFCAB10   | 7q22.3   | -0.00922 | 0.857501 | 0.903328 |
| HDAC3     | 5q31.3   | -0.00921 | 0.857603 | 0.903388 |
| CLSTN1    | 1p36.22  | -0.00919 | 0.857949 | 0.903705 |
| HSPA8     | 11q24.1  | -0.00916 | 0.85839  | 0.904122 |
| VSTM2B    | 19q12    | -0.00913 | 0.858884 | 0.904595 |
| ZDHHC24   | 11q13.2  | -0.00911 | 0.859151 | 0.904819 |
| CTH       | 1p31.1   | 0.009107 | 0.859187 | 0.904819 |
| ANKRD27   | 19q13.11 | 0.009099 | 0.859312 | 0.904903 |
| ARRDC2    | 19p13.11 | 0.009088 | 0.859474 | 0.905026 |
| SIRT5     | 6p23     | 0.009069 | 0.859764 | 0.905219 |
| RABEPK    | 9q33.3   | -0.00907 | 0.859764 | 0.905219 |

|            |          |          |          |          |
|------------|----------|----------|----------|----------|
| BCL7A      | 12q24.31 | 0.009067 | 0.859793 | 0.905219 |
| HIST1H2AA  | 6p22.2   | -0.00906 | 0.85991  | 0.905247 |
| LINC00293  | 8q11.1   | -0.00906 | 0.85991  | 0.905247 |
| NUS1       | 6q22.1   | -0.00904 | 0.860176 | 0.905479 |
| SLC13A4    | 7q33     | 0.009037 | 0.860249 | 0.905509 |
| GPR15      | 3q11.2   | 0.009034 | 0.860305 | 0.90552  |
| CSNK2A1    | 20p13    | -0.00903 | 0.860396 | 0.905569 |
| MPHOSPH10  | 2p13.3   | -0.00902 | 0.860551 | 0.905684 |
| KRTAP2-1   | 17q21.2  | -0.00901 | 0.860667 | 0.905759 |
| OR2M3      | 1q44     | -0.009   | 0.860851 | 0.905881 |
| MAPK1IP1L  | 14q22.3  | -0.009   | 0.860874 | 0.905881 |
| PIAS2      | 18q21.1  | 0.008982 | 0.861095 | 0.906066 |
| CA4        | 17q23.1  | -0.00895 | 0.861511 | 0.906456 |
| FAM30A     | 14q32.33 | -0.00895 | 0.861629 | 0.906531 |
| BMP7       | 20q13.31 | -0.00894 | 0.861701 | 0.906531 |
| CLN8       | 8p23.3   | 0.008941 | 0.861718 | 0.906531 |
| DPY19L1    | 7p14.2   | 0.008938 | 0.861767 | 0.906535 |
| SPANXA2    | Xq27.2   | -0.00893 | 0.861929 | 0.906657 |
| OSBP2      | 22q12.2  | 0.00892  | 0.862052 | 0.90674  |
| LINC00114  | 21q22.2  | 0.008888 | 0.862527 | 0.90717  |
| ALG1       | 16p13.3  | -0.00889 | 0.862552 | 0.90717  |
| KRTAP10-11 | 21q22.3  | -0.00888 | 0.862718 | 0.907297 |
| DCAF6      | 1q24.2   | 0.008835 | 0.86334  | 0.907903 |
| PIM1       | 6p21.2   | -0.00882 | 0.863554 | 0.908037 |
| OSGIN1     | 16q23.3  | -0.00882 | 0.863561 | 0.908037 |
| TBCCD1     | 3q27.3   | -0.00882 | 0.863603 | 0.908037 |
| CXORF38    | Xp11.4   | -0.00881 | 0.863683 | 0.908073 |
| AIMP1      | 4q24     | 0.008801 | 0.863874 | 0.908226 |
| SLC35A3    | 1p21.2   | -0.00877 | 0.864306 | 0.908624 |
| ARMC3      | 10p12.2  | 0.008769 | 0.86435  | 0.908624 |
| RRP8       | 11p15.4  | 0.008767 | 0.864388 | 0.908624 |
| GAGE12D    | Xp11.23  | -0.00876 | 0.864512 | 0.908707 |
| CDK5R1     | 17q11.2  | 0.008727 | 0.865008 | 0.90918  |
| SNORA23    | 11p15.4  | -0.00872 | 0.865128 | 0.909259 |
| NIPAL2     | 8q22.2   | 0.008706 | 0.865315 | 0.909407 |
| TRAPPC10   | 21q22.3  | 0.0087   | 0.865411 | 0.90946  |
| GSTA2      | 6p12.2   | -0.00869 | 0.865541 | 0.909532 |
| TRIM16L    | 17p11.2  | -0.00869 | 0.865594 | 0.909532 |
| GSX1       | 13q12.2  | -0.00869 | 0.865615 | 0.909532 |
| SMTN       | 22q12.2  | 0.008681 | 0.865704 | 0.909538 |
| GPR83      | 11q21    | 0.008678 | 0.865749 | 0.909538 |
| MELTF      | 3q29     | 0.008678 | 0.865757 | 0.909538 |
| LRRC75B    | 22q11.23 | -0.00866 | 0.865952 | 0.909694 |
| RAB27B     | 18q21.2  | 0.008646 | 0.866248 | 0.909931 |
| CYREN      | 7q33     | -0.00864 | 0.866308 | 0.909931 |
| HDGFL1     | 6p22.3   | -0.00864 | 0.866316 | 0.909931 |
| GLB1L3     | 11q25    | -0.00864 | 0.866369 | 0.909931 |
| ZNF493     | 19p12    | 0.008635 | 0.866404 | 0.909931 |
| MCTS1      | Xq24     | -0.00861 | 0.86677  | 0.910268 |
| ZNF273     | 7q11.21  | -0.00861 | 0.866862 | 0.910317 |
| OR1S1      | 11q12.1  | -0.00859 | 0.867026 | 0.910441 |
| LHX2       | 9q33.3   | 0.008587 | 0.867146 | 0.910519 |
| AMELY      | Yp11.2   | 0.00858  | 0.867249 | 0.910579 |
| SLC35G1    | 10q23.33 | -0.00857 | 0.86743  | 0.910722 |
| SPAG6      | 10p12.2  | -0.00856 | 0.867504 | 0.910752 |
| LRP2BP     | 4q35.1   | 0.008558 | 0.867588 | 0.910793 |
| PPP1R12B   | 1q32.1   | 0.00855  | 0.86772  | 0.910839 |
| IL20       | 1q32.1   | -0.00855 | 0.867724 | 0.910839 |



|           |          |          |          |          |
|-----------|----------|----------|----------|----------|
| TGM4      | 3p21.31  | 0.008529 | 0.868039 | 0.911094 |
| OR52E4    | 11p15.4  | 0.008528 | 0.868058 | 0.911094 |
| SPRR2C    | 1q21.3   | 0.008516 | 0.86824  | 0.911238 |
| DENND6B   | 22q13.33 | -0.00851 | 0.868311 | 0.911243 |
| RIPK3     | 14q12    | -0.00851 | 0.868336 | 0.911243 |
| DMRTB1    | 1p32.3   | -0.00848 | 0.868753 | 0.911633 |
| ANKRD40CL | 17q21.33 | 0.008473 | 0.868889 | 0.911697 |
| KDM5B     | 1q32.1   | -0.00847 | 0.868905 | 0.911697 |
| NACA      | 12q13.3  | -0.00846 | 0.86907  | 0.911783 |
| LINC00926 | 15q21.3  | 0.008456 | 0.869153 | 0.911783 |
| HIST1H3A  | 6p22.2   | 0.008455 | 0.869163 | 0.911783 |
| KRT9      | 17q21.2  | 0.008455 | 0.869169 | 0.911783 |
| NDUFC1    | 4q31.1   | 0.008445 | 0.869318 | 0.911882 |
| CXCL11    | 4q21.1   | 0.008441 | 0.869391 | 0.911882 |
| PDCL3     | 2q11.2   | 0.00844  | 0.8694   | 0.911882 |
| MED7      | 5q33.3   | -0.00843 | 0.869523 | 0.911963 |
| TM4SF20   | 2q36.3   | -0.0084  | 0.869995 | 0.91241  |
| ALG10     | 12p11.1  | 0.008371 | 0.87046  | 0.912761 |
| NME6      | 3p21.31  | 0.008371 | 0.870464 | 0.912761 |
| ERICH6    | 3q25.1   | 0.008371 | 0.870466 | 0.912761 |
| NT5M      | 17p11.2  | 0.008362 | 0.870589 | 0.912842 |
| CHRM3     | 1q43     | -0.00835 | 0.87081  | 0.913026 |
| RPS19BP1  | 22q13.1  | -0.00832 | 0.871283 | 0.913474 |
| TAAR1     | 6q23.2   | -0.00829 | 0.871663 | 0.913824 |
| NR2F1     | 5q15     | -0.00829 | 0.871725 | 0.913836 |
| SLC30A9   | 4p13     | 0.008286 | 0.871765 | 0.913836 |
| HSD11B2   | 16q22.1  | -0.00827 | 0.871966 | 0.913999 |
| LINC00526 | 18p11.31 | -0.00825 | 0.872293 | 0.914294 |
| PPP2R1A   | 19q13.41 | 0.008241 | 0.872449 | 0.914409 |
| CCZ1B     | 7p22.1   | 0.008222 | 0.872739 | 0.914666 |
| DHPS      | 19p13.13 | 0.008214 | 0.872865 | 0.914705 |
| EFCAB3    | 17q23.2  | 0.008214 | 0.872868 | 0.914705 |
| ASF1A     | 6q22.31  | -0.00819 | 0.873202 | 0.91499  |
| EDF1      | 9q34.3   | -0.00819 | 0.873232 | 0.91499  |
| NAT1      | 8p22     | -0.00817 | 0.873486 | 0.915209 |
| CYP4X1    | 1p33 1   | -0.00817 | 0.873605 | 0.915286 |
| SUN3      | 7p12.3   | 0.00816  | 0.873696 | 0.915324 |
| CELA2A    | 1p36.21  | -0.00815 | 0.873795 | 0.915324 |
| NOD1      | 7p14.3   | -0.00815 | 0.87381  | 0.915324 |
| GALR2     | 17q25.1  | -0.00815 | 0.873824 | 0.915324 |
| FAIM      | 3q22.3   | 0.008146 | 0.873912 | 0.915368 |
| PSG10P    | 19q13.2  | -0.00813 | 0.874152 | 0.915557 |
| RNU6ATAC  | 9q34.2   | -0.00813 | 0.874212 | 0.915557 |
| ERCC8     | 5q12.1   | 0.008125 | 0.874229 | 0.915557 |
| C1ORF109  | 1p34.3   | -0.00811 | 0.874467 | 0.915758 |
| RIPPLY3   | 21q22.13 | -0.0081  | 0.874542 | 0.915788 |
| PM20D2    | 6q15     | 0.008102 | 0.874593 | 0.915794 |
| CACNA1E   | 1q25.3   | -0.00809 | 0.874792 | 0.915954 |
| ZNF192P1  | 6p22.1   | 0.008084 | 0.874856 | 0.915974 |
| OTUB1     | 11q13.1  | 0.008081 | 0.874907 | 0.915979 |
| ABCB7     | Xq13.3   | -0.00806 | 0.875214 | 0.916253 |
| MIR503HG  | Xq26.3   | 0.008055 | 0.875308 | 0.916271 |
| WDFY1     | 2q36.1   | -0.00805 | 0.875323 | 0.916271 |
| NELFCD    | 20q13.32 | -0.00804 | 0.875482 | 0.916389 |
| TMC1      | 9q21.13  | 0.008036 | 0.875607 | 0.916472 |
| SLC17A6   | 11p14.3  | -0.00803 | 0.875767 | 0.916592 |
| GPR101    | Xq26.3   | 0.008008 | 0.876023 | 0.916812 |
| LINC02159 | 5q34     | -0.008   | 0.876143 | 0.91689  |

|            |               |          |          |          |
|------------|---------------|----------|----------|----------|
| KCNE3      | 11q13.4       | -0.00799 | 0.876305 | 0.917011 |
| ZNF395     | 8p21.1        | 0.007985 | 0.876384 | 0.917046 |
| PNMA5      | Xq28          | -0.00798 | 0.876437 | 0.917053 |
| KLK13      | 19q13.41      | 0.007975 | 0.876541 | 0.917056 |
| ZNF41      | Xp11.3        | 0.007973 | 0.876563 | 0.917056 |
| MATN4      | 20q13.12      | 0.007972 | 0.876577 | 0.917056 |
| PRSS40A    | 2q21.1        | 0.007968 | 0.876638 | 0.917073 |
| SLC27A2    | 15q21.2       | -0.00796 | 0.876804 | 0.91715  |
| TYW1       | 7q11.21       | 0.007958 | 0.876804 | 0.91715  |
| GPR137C    | 14q22.1       | -0.00795 | 0.876874 | 0.917175 |
| OR52R1     | 11p15.4       | -0.00794 | 0.877091 | 0.917354 |
| SLC9A7     | Xp11.3 Xp11.3 | 0.00792  | 0.87738  | 0.917608 |
| ADAMTSL5   | 19p13.3       | 0.007876 | 0.878051 | 0.91816  |
| CALHM4     | 6q22.1        | -0.00787 | 0.878114 | 0.91816  |
| DENND3     | 8q24.3        | -0.00787 | 0.878177 | 0.91816  |
| INSR       | 19p13.2       | -0.00786 | 0.878253 | 0.91816  |
| MEIOC      | 17q21.31      | 0.007862 | 0.878276 | 0.91816  |
| PORCN      | Xp11.23       | -0.00786 | 0.878279 | 0.91816  |
| CACNA1D    | 3p21.1        | -0.00786 | 0.878352 | 0.91816  |
| TBC1D7     | 6p24.1        | 0.007856 | 0.878365 | 0.91816  |
| CFHR2      | 1q31.3        | 0.007854 | 0.878399 | 0.91816  |
| NMRK2      | 19p13.3       | -0.00785 | 0.878409 | 0.91816  |
| ECSIT      | 19p13.2       | 0.007853 | 0.878411 | 0.91816  |
| KCND1      | Xp11.23       | -0.00784 | 0.878534 | 0.918217 |
| GSS        | 20q11.22      | -0.00784 | 0.878603 | 0.918217 |
| TTC39A     | 1p32.3        | 0.00784  | 0.878603 | 0.918217 |
| BAALC-AS2  | 8q22.3        | 0.007836 | 0.878671 | 0.918222 |
| SPATA45    | 1q32.3        | -0.00783 | 0.8787   | 0.918222 |
| ZNF91      | 19p12         | 0.007767 | 0.879738 | 0.91918  |
| MRPL51     | 12p13.31      | 0.007764 | 0.879771 | 0.91918  |
| NOCT       | 4q31.1        | 0.007764 | 0.879781 | 0.91918  |
| DNMT3L     | 21q22.3       | -0.00776 | 0.8798   | 0.91918  |
| MST1       | 3p21.31       | -0.00775 | 0.879923 | 0.919247 |
| SLC16A10   | 6q21          | -0.00775 | 0.879956 | 0.919247 |
| TGIF1      | 18p11.31      | -0.00775 | 0.880055 | 0.919303 |
| MTCH2      | 11p11.2       | 0.007736 | 0.880201 | 0.919366 |
| ZNF77      | 19p13.3       | 0.007736 | 0.880208 | 0.919366 |
| COL23A1    | 5q35.3        | -0.00773 | 0.88033  | 0.919418 |
| PIN4P1     | 15q15.3       | 0.007727 | 0.88035  | 0.919418 |
| SPATA31A5  | 9q12          | -0.00772 | 0.880424 | 0.919448 |
| GCLM       | 1p22.1        | 0.007711 | 0.880598 | 0.919579 |
| GAGE4      | Xp11.4-p11.2  | -0.00771 | 0.880671 | 0.919579 |
| ASPSCR1    | 17q25.3       | -0.0077  | 0.880687 | 0.919579 |
| ST6GALNAC2 | 17q25.1       | 0.00768  | 0.881075 | 0.919931 |
| ZNF488     | 10q11.22      | 0.007677 | 0.881116 | 0.919931 |
| OR4K1      | 14q11.2       | -0.00767 | 0.881289 | 0.920063 |
| ACTG1      | 17q25.3       | 0.007658 | 0.881409 | 0.92014  |
| GABRA4     | 4p12          | 0.007635 | 0.881755 | 0.920454 |
| MDH1B      | 2q33.3        | -0.00763 | 0.881823 | 0.920477 |
| ATP5PF     | 21q21.3       | 0.007618 | 0.882018 | 0.920632 |
| ASXL2      | 2p23.3        | -0.00761 | 0.882097 | 0.920667 |
| ZNF577     | 19q13.41      | 0.007607 | 0.88219  | 0.920716 |
| NXPE1      | 11q23.2       | 0.007561 | 0.882902 | 0.9214   |
| SPATA17    | 1q41          | -0.00756 | 0.882938 | 0.9214   |
| DUSP27     | 1q24.1        | 0.007551 | 0.883055 | 0.921474 |
| BUD23      | 7q11.23       | 0.007539 | 0.883239 | 0.921583 |
| RFX6       | 6q22.1        | 0.007537 | 0.883273 | 0.921583 |
| FAM122A    | 9q21.11       | -0.00753 | 0.883319 | 0.921583 |

|              |                       |          |          |          |
|--------------|-----------------------|----------|----------|----------|
| GABRR3       | 3q11.2                | -0.00753 | 0.883342 | 0.921583 |
| FZD3         | 8p21.1                | 0.007507 | 0.883722 | 0.921931 |
| OR10A4       | 11p15.4               | -0.0075  | 0.883776 | 0.921939 |
| PSMB3        | 17q12                 | 0.007492 | 0.883958 | 0.92208  |
| GAB2         | 11q14.1               | 0.007482 | 0.88412  | 0.922158 |
| PRAMEF2      | 1p36.21               | 0.007481 | 0.884124 | 0.922158 |
| KRT82        | 12q13.13              | -0.00747 | 0.884269 | 0.922261 |
| WASHC2C      | 10q11.22              | 0.007459 | 0.884474 | 0.922417 |
| GJB2         | 13q12.11              | 0.007456 | 0.88451  | 0.922417 |
| MADD         | 11p11.2               | 0.007443 | 0.884716 | 0.922501 |
| DSG3         | 18q12.1               | 0.007442 | 0.884722 | 0.922501 |
| FAM8A1       | 6p22.3                | 0.007442 | 0.884729 | 0.922501 |
| C12ORF50     | 12q21.32              | 0.007439 | 0.884781 | 0.922507 |
| CD177        | 19q13.31              | 0.00743  | 0.884918 | 0.922601 |
| SLC23A2      | 20p13                 | -0.00742 | 0.885001 | 0.922602 |
| ITPRIP       | 10q25.1               | 0.007424 | 0.88501  | 0.922602 |
| ESF1         | 20p12.1               | -0.00741 | 0.885246 | 0.922799 |
| NKX2-2       | 20p11.22              | -0.0074  | 0.885298 | 0.922805 |
| BAG2         | 6p12.1                | -0.00739 | 0.885501 | 0.922914 |
| CDK7         | 5q13.2                | 0.007391 | 0.885514 | 0.922914 |
| DNASE1       | 16p13.3               | -0.00739 | 0.88554  | 0.922914 |
| DEFB136      | 8p23.1                | 0.007381 | 0.885674 | 0.922929 |
| SATB2        | 2q33.1                | -0.00738 | 0.885693 | 0.922929 |
| SLC16A5      | 17q25.1               | -0.00738 | 0.885693 | 0.922929 |
| STX18        | 4p16.3-p16.2          | 0.007375 | 0.885759 | 0.92295  |
| DBI          | 2q14.2                | 0.007348 | 0.88617  | 0.92333  |
| HPN-AS1      | 19q13.11-q13.12       | 0.007336 | 0.886352 | 0.923471 |
| NUDT13       | 10q22.2               | 0.007311 | 0.886741 | 0.923829 |
| ANKRD20A4    | 9q13                  | -0.00731 | 0.886829 | 0.923872 |
| ZC3H13       | 13q14.13              | -0.0073  | 0.886918 | 0.923917 |
| CHIC1        | Xq13.2                | -0.00728 | 0.88715  | 0.924111 |
| BCL7C        | 16p11.2               | 0.007265 | 0.887448 | 0.924373 |
| WAC          | 10p12.1 10p12.1-p11.2 | -0.00725 | 0.887637 | 0.924515 |
| PRDM4        | 12q23.3               | -0.00725 | 0.887677 | 0.924515 |
| ZNF815P      | 7p22.1                | -0.00724 | 0.88789  | 0.92469  |
| TNP2         | 16p13.13              | 0.007225 | 0.888069 | 0.924828 |
| N4BP2        | 4p14                  | -0.00721 | 0.888303 | 0.925023 |
| ENO2         | 12p13.31              | -0.0072  | 0.888432 | 0.92511  |
| TMEM209      | 7q32.2                | -0.0072  | 0.888508 | 0.925141 |
| INTS10       | 8p21.3                | 0.007188 | 0.888634 | 0.92521  |
| BBS7         | 4q27                  | 0.007186 | 0.888667 | 0.92521  |
| MRPL54       | 19p13.3               | -0.00718 | 0.888833 | 0.925335 |
| PSKH2        | 8q21.3                | -0.00716 | 0.889082 | 0.925546 |
| DHX8         | 17q21.31              | -0.00713 | 0.889506 | 0.925939 |
| SLC46A3      | 13q12.3               | 0.007123 | 0.889632 | 0.926022 |
| BPTF         | 17q24.2               | 0.007116 | 0.889744 | 0.926091 |
| INS          | 11p15.5               | 0.007103 | 0.889939 | 0.926245 |
| RBBP8NL      | 20q13.33              | 0.007098 | 0.89003  | 0.926291 |
| SLC22A15     | 1p13.1                | 0.007034 | 0.891014 | 0.927268 |
| ASZ1         | 7q31.2                | 0.007021 | 0.891204 | 0.927417 |
| LOC100130691 | 2q31.2                | 0.007008 | 0.891408 | 0.927582 |
| RPA1         | 17p13.3               | -0.00699 | 0.89169  | 0.927751 |
| HOXC5        | 12q13.13              | 0.006989 | 0.891708 | 0.927751 |
| TUBB2A       | 6p25.2                | -0.00699 | 0.89175  | 0.927751 |
| CCDC24       | 1p34.1                | 0.006985 | 0.891757 | 0.927751 |
| CISD1        | 10q21.1               | -0.00698 | 0.891833 | 0.927772 |
| HDAC7        | 12q13.11              | -0.00698 | 0.891879 | 0.927772 |
| RTL9         | Xq23                  | -0.00697 | 0.891935 | 0.927772 |

|             |                 |          |          |          |
|-------------|-----------------|----------|----------|----------|
| HSD17B4     | 5q23.1          | -0.00697 | 0.891962 | 0.927772 |
| SPATA31D1   | 9q21.32         | -0.00695 | 0.892313 | 0.928041 |
| CYB5B       | 16q22.1         | -0.00695 | 0.892377 | 0.928041 |
| PIK3CB      | 3q22.3          | 0.006943 | 0.892416 | 0.928041 |
| SHQ1        | 3p13            | 0.006939 | 0.892476 | 0.928041 |
| SKAP1       | 17q21.32        | -0.00693 | 0.892542 | 0.928041 |
| DRC7        | 16q21           | -0.00693 | 0.892543 | 0.928041 |
| FAM133B     | 7q21.2          | -0.00693 | 0.892572 | 0.928041 |
| KRTAP10-5   | 21q22.3         | 0.006931 | 0.892592 | 0.928041 |
| AUP1        | 2p13.1          | -0.00692 | 0.892725 | 0.928132 |
| OR52D1      | 11p15.4         | 0.006913 | 0.892867 | 0.928232 |
| LBX2        | 2p13.1          | -0.0069  | 0.893143 | 0.92847  |
| KIR2DL4     | 19q13.42        | -0.00688 | 0.893303 | 0.928588 |
| PRLH        | 2q37.3          | 0.006871 | 0.893516 | 0.928761 |
| GRHR        | 9p13.2          | 0.006868 | 0.89357  | 0.92877  |
| CNGA2       | Xq28            | -0.00686 | 0.893635 | 0.928788 |
| DCAF8L2     | Xp21.3          | -0.00685 | 0.893888 | 0.929004 |
| CLDN22      | 4q35.1          | -0.00684 | 0.894025 | 0.929098 |
| COX7B2      | 4p12            | 0.00683  | 0.894155 | 0.929185 |
| TUBAL3      | 10p15.1         | -0.00682 | 0.894346 | 0.929324 |
| C7ORF71     | 7p15.2          | -0.00681 | 0.894382 | 0.929324 |
| OXTR        | 3p25.3          | -0.00679 | 0.894827 | 0.929738 |
| RPL7A       | 9q34.2          | 0.006782 | 0.89489  | 0.929749 |
| HOXD1       | 2q31.1          | 0.006779 | 0.89493  | 0.929749 |
| LDHAL6A     | 11p15.1         | 0.006765 | 0.895144 | 0.929891 |
| PADI3       | 1p36.13         | 0.006763 | 0.895179 | 0.929891 |
| PNMA3       | Xq28            | 0.006761 | 0.895206 | 0.929891 |
| TBRG1       | 11q24.2         | -0.00676 | 0.895272 | 0.929911 |
| NAPG        | 18p11.22        | -0.00675 | 0.895451 | 0.930049 |
| KRTAP21-1   | 21q22.11        | 0.006736 | 0.89559  | 0.930145 |
| LZIC        | 1p36.22         | -0.00673 | 0.89569  | 0.9302   |
| HDAC2       | 6q21            | 0.006677 | 0.896509 | 0.931003 |
| LOC284379   | 19q13.42        | -0.00667 | 0.896612 | 0.931031 |
| CACNB2      | 10p12.33-p12.31 | 0.006669 | 0.896629 | 0.931031 |
| AMTN        | 4q13.3          | 0.006662 | 0.896736 | 0.931094 |
| ADORA2A-AS1 | 22q11.23        | 0.006653 | 0.896881 | 0.931151 |
| VIL1        | 2q35            | 0.006653 | 0.896884 | 0.931151 |
| NACA2       | 17q23.2         | -0.00665 | 0.896981 | 0.931203 |
| NOTCH2NLA   | 1q21.1          | -0.00664 | 0.89705  | 0.931227 |
| SPATS2      | 12q13.12        | 0.006636 | 0.897133 | 0.931265 |
| NDUFB7      | 19p13.12        | -0.00663 | 0.8972   | 0.931285 |
| FAM45BP     | Xq26.1          | -0.00662 | 0.897455 | 0.931502 |
| PATE2       | 11q24.2         | 0.006588 | 0.897876 | 0.93189  |
| ACCS        | 11p11.2         | 0.006571 | 0.898139 | 0.932115 |
| NSUN3       | 3q11.2          | -0.00652 | 0.898907 | 0.932864 |
| MCTS2P      | 20q11.21        | 0.006501 | 0.899226 | 0.933147 |
| C11ORF24    | 11q13.2         | 0.006484 | 0.899476 | 0.933358 |
| TNFSF9      | 19p13.3         | -0.00648 | 0.899596 | 0.933434 |
| MRPL57      | 13q12.11        | -0.00646 | 0.899789 | 0.933585 |
| TAF9        | 5q13.2          | 0.00646  | 0.899855 | 0.933606 |
| WRN         | 8p12            | -0.00645 | 0.900047 | 0.933757 |
| ZCCHC13     | Xq13.2          | -0.00641 | 0.900676 | 0.934361 |
| GHSR        | 3q26.31         | -0.0064  | 0.90085  | 0.934485 |
| C7ORF69     | 7p12.3          | 0.006393 | 0.900888 | 0.934485 |
| SLC13A2     | 17q11.2         | -0.00638 | 0.901103 | 0.934659 |
| LINC00298   | 2p25.1          | 0.006369 | 0.901256 | 0.934769 |
| BABAM2-AS1  | 2p23.2          | 0.006364 | 0.901329 | 0.934796 |
| MYCBP2      | 13q22.3         | 0.006357 | 0.901439 | 0.934848 |

|           |          |          |          |          |
|-----------|----------|----------|----------|----------|
| PPM1N     | 19q13.32 | 0.006355 | 0.901472 | 0.934848 |
| INCA1     | 17p13.2  | -0.00634 | 0.901668 | 0.934983 |
| RFX3      | 9p24.2   | 0.00634  | 0.901704 | 0.934983 |
| HIST1H3E  | 6p22.2   | 0.006334 | 0.901804 | 0.934983 |
| ZNF529    | 19q13.12 | 0.006333 | 0.901807 | 0.934983 |
| BTBD9     | 6p21.2   | 0.006331 | 0.901847 | 0.934983 |
| PPP1R42   | 8q13.1   | -0.00633 | 0.901883 | 0.934983 |
| DNAI2     | 17q25.1  | -0.00632 | 0.901996 | 0.935052 |
| ZNF845    | 19q13.42 | -0.00631 | 0.90209  | 0.935101 |
| FAM89A    | 1q42.2   | 0.006311 | 0.902146 | 0.935111 |
| ZFP64     | 20q13.2  | 0.006294 | 0.902415 | 0.935296 |
| ZBTB21    | 21q22.3  | -0.00629 | 0.902418 | 0.935296 |
| INHBC     | 12q13.3  | 0.006275 | 0.902711 | 0.935451 |
| WDR54     | 2p13.1   | -0.00627 | 0.902721 | 0.935451 |
| PDZD11    | Xq13.1   | 0.006272 | 0.90275  | 0.935451 |
| OR10H4    | 19p13.12 | -0.00627 | 0.902754 | 0.935451 |
| RPL13AP17 | 7q21.11  | 0.006268 | 0.902812 | 0.935463 |
| RADX      | Xq22.3   | -0.00626 | 0.902913 | 0.935519 |
| LINC00294 | 11p13    | 0.006241 | 0.903235 | 0.935804 |
| OVCH1     | 12p11.22 | -0.00623 | 0.903341 | 0.935835 |
| JUP       | 17q21.2  | -0.00623 | 0.903358 | 0.935835 |
| TMTC4     | 13q32.3  | -0.00623 | 0.903465 | 0.935896 |
| ARAF      | Xp11.3   | -0.00618 | 0.904202 | 0.936612 |
| OR3A2     | 17p13.3  | -0.00617 | 0.904352 | 0.936719 |
| BPY2      | Yq11.223 | 0.006164 | 0.904425 | 0.936746 |
| ARID1B    | 6q25.3   | 0.006159 | 0.904501 | 0.936776 |
| L3HYPDH   | 14q23.1  | 0.006152 | 0.904611 | 0.936795 |
| OPN4      | 10q23.2  | -0.00615 | 0.904613 | 0.936795 |
| ABTB2     | 11p13    | -0.00615 | 0.904697 | 0.936834 |
| CYP4Z2P   | 1p33     | 0.006142 | 0.904754 | 0.936844 |
| CUTA      | 6p21.32  | 0.006128 | 0.904979 | 0.937029 |
| MYL1      | 2q34     | 0.00612  | 0.905105 | 0.937111 |
| TNNI3     | 19q13.42 | 0.006113 | 0.9052   | 0.937161 |
| TKFC      | 11q12.2  | -0.00611 | 0.905312 | 0.937228 |
| METTL21EP | 13q33.1  | -0.00609 | 0.905587 | 0.937395 |
| FOLH1B    | 11q14.3  | -0.00609 | 0.905612 | 0.937395 |
| RFFL      | 17q12    | -0.00608 | 0.905651 | 0.937395 |
| FAM136A   | 2p13.3   | -0.00608 | 0.905661 | 0.937395 |
| COX10     | 17p12    | 0.006069 | 0.905893 | 0.937588 |
| ARHGAP10  | 4q31.23  | -0.00606 | 0.90595  | 0.937598 |
| LYPLA2P1  | 6p21.32  | 0.006059 | 0.906043 | 0.937638 |
| EHHADH    | 3q27.2   | -0.00606 | 0.906083 | 0.937638 |
| FSCN1     | 7p22.1   | -0.00604 | 0.906315 | 0.937831 |
| TST       | 22q12.3  | 0.006037 | 0.906375 | 0.93784  |
| ODC1      | 2p25.1   | 0.006034 | 0.906418 | 0.93784  |
| ZNF778    | 16q24.3  | 0.006019 | 0.906661 | 0.938043 |
| C9ORF139  | 9q34.3   | -0.00602 | 0.906707 | 0.938043 |
| MYCN      | 2p24.3   | 0.006008 | 0.906834 | 0.938125 |
| LINC01554 | 5q15     | -0.006   | 0.907    | 0.938248 |
| TBC1D12   | 10q23.33 | 0.005992 | 0.90708  | 0.93825  |
| COX6A2    | 16p11.2  | 0.005991 | 0.907096 | 0.93825  |
| AZGP1     | 7q22.1   | -0.00598 | 0.907183 | 0.938292 |
| FURIN     | 15q26.1  | 0.005982 | 0.907232 | 0.938295 |
| TAS2R60   | 7q35     | -0.00596 | 0.907511 | 0.938535 |
| BCYRN1    | 2p21     | -0.00595 | 0.907799 | 0.938784 |
| DDHD1     | 14q22.1  | 0.00594  | 0.907871 | 0.93881  |
| GALNTL6   | 4q34.1   | 0.005895 | 0.908574 | 0.939488 |
| SLC3A2    | 11q12.3  | 0.005872 | 0.908928 | 0.93976  |

|              |          |          |          |          |
|--------------|----------|----------|----------|----------|
| RPSAP58      | 19p12    | -0.00587 | 0.908938 | 0.93976  |
| DDX10        | 11q22.3  | 0.005869 | 0.908978 | 0.93976  |
| RFX8         | 2q11.2   | -0.00586 | 0.909083 | 0.939814 |
| INSM1        | 20p11.23 | -0.00586 | 0.909124 | 0.939814 |
| NDUFV2       | 18p11.22 | -0.00585 | 0.909287 | 0.939833 |
| NECAB3       | 20q11.22 | 0.005848 | 0.909297 | 0.939833 |
| ANXA8L1      | 10q11.22 | -0.00585 | 0.909336 | 0.939833 |
| SUPT7L       | 2p23.3   | 0.005845 | 0.90935  | 0.939833 |
| LTN1         | 21q21.3  | 0.005843 | 0.909376 | 0.939833 |
| S100A5       | 1q21.3   | -0.00584 | 0.909457 | 0.939867 |
| NT5E         | 6q14.3   | 0.005814 | 0.909829 | 0.940203 |
| KRTAP26-1    | 21q22.11 | 0.005807 | 0.909926 | 0.940255 |
| TTC4         | 1p32.3   | -0.0058  | 0.910061 | 0.940267 |
| NBEAL1       | 2q33.2   | 0.005798 | 0.910065 | 0.940267 |
| SPRR2E       | 1q21.3   | -0.0058  | 0.910078 | 0.940267 |
| G6PC2        | 2q31.1   | -0.00578 | 0.910279 | 0.940426 |
| PPP6R3       | 11q13.2  | -0.00577 | 0.91047  | 0.940575 |
| SLC7A6OS     | 16q22.1  | -0.00576 | 0.910593 | 0.940654 |
| MRPL43       | 10q24.31 | -0.00576 | 0.91073  | 0.940746 |
| SH3TC2       | 5q32     | 0.005751 | 0.910793 | 0.940763 |
| SLC32A1      | 20q11.23 | -0.00574 | 0.911016 | 0.940945 |
| RNF219       | 13q31.1  | 0.005727 | 0.911172 | 0.941056 |
| C12ORF40     | 12q12    | 0.005723 | 0.911222 | 0.941056 |
| SEC61G       | 7p11.2   | -0.00572 | 0.911265 | 0.941056 |
| DKFZP434A062 | 9q34.3   | 0.00569  | 0.911737 | 0.941495 |
| RAB40AL      | Xq22.1   | 0.005686 | 0.911798 | 0.94151  |
| KANSL2       | 12q13.11 | -0.00567 | 0.91206  | 0.941732 |
| MMP21        | 10q26.2  | -0.00566 | 0.91216  | 0.941786 |
| CA7          | 16q22.1  | 0.00565  | 0.91235  | 0.941933 |
| SLC35B1      | 17q21.33 | 0.005644 | 0.912449 | 0.941967 |
| SPATA41      | 15q26.3  | -0.00564 | 0.912476 | 0.941967 |
| OR5L1        | 11q12.1  | -0.00563 | 0.91264  | 0.942041 |
| SAXO1        | 9p22.1   | -0.00563 | 0.912703 | 0.942041 |
| IP6K2        | 3p21.31  | -0.00562 | 0.912785 | 0.942041 |
| PTCD3        | 2p11.2   | 0.00562  | 0.912825 | 0.942041 |
| CDH7         | 18q22.1  | -0.00562 | 0.912825 | 0.942041 |
| EIF3IP1      | 7q31.1   | 0.005619 | 0.91283  | 0.942041 |
| DCTN3        | 9p13.3   | -0.0056  | 0.913171 | 0.942344 |
| ZC3HAV1      | 7q34     | -0.00556 | 0.913676 | 0.942748 |
| LGALS4       | 19q13.2  | -0.00556 | 0.91368  | 0.942748 |
| RPIA         | 2p11.2   | -0.00556 | 0.913703 | 0.942748 |
| MYH7B        | 20q11.22 | 0.005549 | 0.913916 | 0.942908 |
| PIP5K1B      | 9q21.11  | 0.005547 | 0.913953 | 0.942908 |
| SNTG1        | 8q11.21  | -0.00554 | 0.91413  | 0.943042 |
| RAP2B        | 3q25.2   | -0.00553 | 0.914202 | 0.943068 |
| ZAN          | 7q22.1   | 0.005516 | 0.914433 | 0.943258 |
| NRAP         | 10q25.3  | -0.00551 | 0.914537 | 0.943317 |
| COPB2        | 3q23     | -0.0055  | 0.914728 | 0.943465 |
| FRA10AC1     | 10q23.33 | -0.00548 | 0.914941 | 0.943636 |
| EML3         | 11q12.3  | -0.00548 | 0.914994 | 0.943642 |
| KCNK7        | 11q13.1  | 0.005464 | 0.91523  | 0.943837 |
| TAS2R40      | 7q34     | 0.00546  | 0.915291 | 0.943851 |
| MMP3         | 11q22.2  | 0.005452 | 0.915416 | 0.943932 |
| PROK2        | 3p13     | -0.00545 | 0.915476 | 0.943944 |
| PIP          | 7q34     | -0.00543 | 0.915757 | 0.944186 |
| FXD5         | 19q13.12 | 0.005413 | 0.916019 | 0.944407 |
| NMT1         | 17q21.31 | -0.0054  | 0.916162 | 0.944464 |
| ITPA         | 20p13    | -0.0054  | 0.916169 | 0.944464 |

|           |          |          |          |          |
|-----------|----------|----------|----------|----------|
| HES1      | 3q29     | 0.005399 | 0.916235 | 0.944484 |
| TEX33     | 22q12.3  | -0.00539 | 0.916301 | 0.944504 |
| TOB2P1    | 6p22.1   | 0.00539  | 0.916372 | 0.944528 |
| IL19      | 1q32.1   | -0.00538 | 0.916582 | 0.944631 |
| PABPC1    | 8q22.3   | -0.00537 | 0.916631 | 0.944631 |
| PRR27     | 4q13.3   | -0.00537 | 0.916645 | 0.944631 |
| SHCBP1L   | 1q25.3   | 0.005369 | 0.916697 | 0.944631 |
| ALX1      | 12q21.31 | 0.005368 | 0.916708 | 0.944631 |
| OR1L1     | 9q33.2   | -0.00536 | 0.916766 | 0.944643 |
| SUGT1P3   | 13q14.11 | -0.00535 | 0.916917 | 0.944732 |
| HOXB13    | 17q21.32 | 0.005353 | 0.916947 | 0.944732 |
| BTBD7     | 14q32.12 | -0.00535 | 0.91704  | 0.944763 |
| PIH1D2    | 11q23.1  | -0.00534 | 0.917072 | 0.944763 |
| DDOST     | 1p36.12  | -0.00532 | 0.917413 | 0.945052 |
| NPW       | 16p13.3  | -0.00532 | 0.917447 | 0.945052 |
| MTRR      | 5p15.31  | 0.005316 | 0.917513 | 0.945072 |
| TNFRSF1B  | 1p36.22  | 0.005266 | 0.918292 | 0.945826 |
| SSMEM1    | 7q32.2   | -0.00526 | 0.918374 | 0.945862 |
| KIAA1211L | 2q11.2   | -0.00525 | 0.918482 | 0.945892 |
| POP4      | 19q12    | -0.00525 | 0.918498 | 0.945892 |
| SNORA75   | 2q37.1   | 0.005246 | 0.918601 | 0.945949 |
| METTL2B   | 7q32.1   | -0.00524 | 0.918728 | 0.946031 |
| LINC01134 | 1p36.32  | -0.00523 | 0.918798 | 0.946055 |
| OR2K2     | 9q31.3   | -0.00523 | 0.918895 | 0.946084 |
| GLA       | Xq22.1   | 0.005225 | 0.918921 | 0.946084 |
| ZNF267    | 16p11.2  | -0.00522 | 0.919021 | 0.946138 |
| LGALS13   | 19q13.2  | -0.00522 | 0.919071 | 0.946142 |
| PITPNA    | 17p13.3  | 0.005201 | 0.919294 | 0.946322 |
| SFXN5     | 2p13.2   | -0.00519 | 0.91951  | 0.946496 |
| NUDT2     | 9p13.3   | 0.005183 | 0.919574 | 0.946505 |
| ELMOD3    | 2p11.2   | -0.00518 | 0.91962  | 0.946505 |
| ZC3H8     | 2q14.1   | -0.00518 | 0.91966  | 0.946505 |
| CRAT      | 9q34.11  | 0.005169 | 0.919797 | 0.946593 |
| GAS2L2    | 17q12    | -0.00517 | 0.91984  | 0.946593 |
| SBF1P1    | 8q12.1   | -0.00516 | 0.919977 | 0.946685 |
| SP140L    | 2q37.1   | -0.00514 | 0.920173 | 0.946822 |
| TCL6      | 14q32.13 | -0.00514 | 0.920204 | 0.946822 |
| GALT      | 9p13.3   | 0.005136 | 0.920303 | 0.946874 |
| PPP1R11   | 6p22.1   | -0.00513 | 0.920353 | 0.946877 |
| PIK3R2    | 19p13.11 | -0.00513 | 0.920456 | 0.946934 |
| OR51B4    | 11p15.4  | 0.005119 | 0.920563 | 0.946971 |
| MAGEB16   | Xp21.1   | 0.005118 | 0.920586 | 0.946971 |
| TMEM241   | 18q11.2  | -0.00508 | 0.921112 | 0.947463 |
| TMEM39B   | 1p35.2   | 0.005076 | 0.921228 | 0.947496 |
| KCNT1     | 9q34.3   | 0.005075 | 0.921238 | 0.947496 |
| ASIC5     | 4q32.1   | -0.00507 | 0.921318 | 0.947525 |
| ZFYVE21   | 14q32.33 | 0.005067 | 0.921361 | 0.947525 |
| HOXB1     | 17q21.32 | -0.00505 | 0.921588 | 0.94771  |
| PPP6C     | 9q33.3   | -0.00504 | 0.921741 | 0.947818 |
| RFX2      | 19p13.3  | -0.00504 | 0.921838 | 0.947869 |
| GGN       | 19q13.2  | -0.00503 | 0.921926 | 0.947911 |
| AKAP14    | Xq24     | 0.005017 | 0.922139 | 0.948081 |
| TMEM38A   | 19p13.11 | 0.005014 | 0.922191 | 0.948086 |
| DUX4L6    | 4q35.2   | 0.004998 | 0.922444 | 0.948297 |
| OR51G2    | 11p15.4  | -0.00499 | 0.922509 | 0.94831  |
| CASTOR2   | 7q11.23  | 0.004991 | 0.92255  | 0.94831  |
| ANKRD66   | 6p12.3   | -0.00497 | 0.922911 | 0.948631 |
| ARF3      | 12q13.12 | 0.004945 | 0.923253 | 0.94891  |

|          |            |          |          |          |
|----------|------------|----------|----------|----------|
| CBX8     | 17q25.3    | -0.00494 | 0.923276 | 0.94891  |
| SAG      | 2q37.1     | 0.004937 | 0.923383 | 0.948971 |
| S100A7A  | 1q21.3     | 0.004931 | 0.923478 | 0.94902  |
| TRIM54   | 2p23.3     | -0.00492 | 0.923572 | 0.949053 |
| C2ORF80  | 2q33.3     | 0.00492  | 0.92364  | 0.949053 |
| PSMB5    | 14q11.2    | 0.004919 | 0.923653 | 0.949053 |
| GUCY2F   | Xq22.3-q23 | 0.004914 | 0.923734 | 0.949088 |
| SDR9C7   | 12q13.3    | -0.00489 | 0.924064 | 0.949379 |
| ADRA2B   | 2q11.2     | -0.00487 | 0.924366 | 0.949639 |
| NARS     | 18q21.31   | 0.004864 | 0.924506 | 0.949703 |
| N4BP2L2  | 13q13.1    | 0.004863 | 0.924522 | 0.949703 |
| KRTAP9-8 | 17q21.2    | -0.00482 | 0.92517  | 0.950294 |
| TBX22    | Xq21.1     | 0.00482  | 0.925193 | 0.950294 |
| ACSF3    | 16q24.3    | 0.004808 | 0.925368 | 0.950426 |
| SOX9     | 17q24.3    | 0.004802 | 0.925462 | 0.950473 |
| TMEM61   | 1p32.3     | -0.00477 | 0.925935 | 0.95091  |
| APOBEC2  | 6p21.1     | 0.004761 | 0.926103 | 0.951034 |
| COPZ1    | 12q13.13   | 0.004751 | 0.926255 | 0.951141 |
| ORMDL1   | 2q32.2     | -0.0047  | 0.927061 | 0.951898 |
| VNN1     | 6q23.2     | 0.004697 | 0.927098 | 0.951898 |
| RTF1     | 15q15.1    | -0.00469 | 0.927134 | 0.951898 |
| KLK12    | 19q13.41   | -0.00467 | 0.927528 | 0.952253 |
| METTL21A | 2q33.3     | -0.00464 | 0.928044 | 0.952734 |
| ZNF780A  | 19q13.2    | -0.00463 | 0.928101 | 0.952743 |
| PMFBP1   | 16q22.2    | 0.004605 | 0.928517 | 0.953097 |
| SPAG17   | 1p12       | 0.004604 | 0.92854  | 0.953097 |
| SLFN14   | 17q12      | -0.0046  | 0.928592 | 0.953101 |
| ICA1     | 7p21.3     | 0.004585 | 0.92883  | 0.953281 |
| MAGEB18  | Xp21.3     | 0.004583 | 0.928862 | 0.953281 |
| RGPD4    | 2q12.3     | -0.00458 | 0.928965 | 0.953338 |
| PIGG     | 4p16.3     | 0.004544 | 0.929464 | 0.9538   |
| BRDTP1   | Xq21.33    | -0.00453 | 0.92966  | 0.953953 |
| CNTFR    | 9p13.3     | -0.00452 | 0.929813 | 0.954061 |
| OR52I2   | 11p15.4    | -0.00451 | 0.92997  | 0.954174 |
| TRIM49   | 11q14.3    | -0.0045  | 0.930136 | 0.954248 |
| CSF3     | 17q21.1    | -0.0045  | 0.930174 | 0.954248 |
| HAGH     | 16p13.3    | -0.0045  | 0.930214 | 0.954248 |
| RUFY2    | 10q21.3    | -0.00449 | 0.930234 | 0.954248 |
| ASB18    | 2q37.2     | -0.00448 | 0.930466 | 0.954437 |
| TMEM121B | 22q11.1    | 0.004472 | 0.93058  | 0.954506 |
| SLC35B2  | 6p21.1     | 0.004466 | 0.930664 | 0.954543 |
| COL4A6   | Xq22.3     | 0.004448 | 0.930952 | 0.95478  |
| GRIK3    | 1p34.3     | 0.004445 | 0.930995 | 0.95478  |
| DPRX     | 19q13.42   | 0.004441 | 0.931061 | 0.95478  |
| PTK2B    | 8p21.2     | 0.004439 | 0.931087 | 0.95478  |
| MSMO1    | 4q32.3     | -0.00444 | 0.931134 | 0.95478  |
| CCDC96   | 4p16.1     | 0.004431 | 0.93121  | 0.95481  |
| PMS2P5   | 7q11.23    | 0.004417 | 0.931434 | 0.954957 |
| OR10AG1  | 11q12.1    | 0.004414 | 0.931482 | 0.954957 |
| PLCD3    | 17q21.31   | 0.004413 | 0.931497 | 0.954957 |
| HSF1     | 8q24.3     | 0.004409 | 0.931554 | 0.954967 |
| CD101    | 1p13.1     | -0.0044  | 0.931721 | 0.955089 |
| TTC36    | 11q23.3    | 0.004355 | 0.932392 | 0.955698 |
| PRKAB2   | 1q21.1     | -0.00435 | 0.932411 | 0.955698 |
| RPL22    | 1p36.31    | -0.00432 | 0.932861 | 0.956111 |
| SLC10A4  | 4p11       | 0.004317 | 0.932977 | 0.956181 |
| APOC3    | 11q23.3    | -0.0043  | 0.93324  | 0.956401 |
| CNIH2    | 11q13.2    | 0.004289 | 0.933408 | 0.956524 |



|            |               |          |          |          |
|------------|---------------|----------|----------|----------|
| LAMB1      | 7q31.1        | -0.00427 | 0.933714 | 0.95679  |
| SMAD5      | 5q31.1        | 0.004257 | 0.933911 | 0.956942 |
| SRPK3      | Xq28          | -0.00425 | 0.933998 | 0.956982 |
| MAGEB1     | Xp21.2        | -0.00422 | 0.93451  | 0.957458 |
| DSP        | 6p24.3        | -0.00421 | 0.934601 | 0.957486 |
| FNDC11     | 20q13.33      | 0.00421  | 0.934633 | 0.957486 |
| LINC00957  | 7p13          | -0.0042  | 0.934725 | 0.957531 |
| HLA-B      | 6p21.33       | -0.0042  | 0.934818 | 0.957578 |
| CCDC155    | 19q13.33      | 0.004194 | 0.934886 | 0.957598 |
| TMEM150B   | 19q13.42      | 0.004178 | 0.935128 | 0.957798 |
| CAV3       | 3p25.3        | -0.00417 | 0.935255 | 0.957878 |
| FMO9P      | 1q24.1        | 0.004163 | 0.935367 | 0.957924 |
| AP4E1      | 15q21.2       | -0.00416 | 0.935395 | 0.957924 |
| CELA3A     | 1p36.12       | -0.00414 | 0.935666 | 0.958114 |
| DEFB109A   | 8p23.1        | -0.00414 | 0.935693 | 0.958114 |
| PPP2R2C    | 4p16.1        | -0.00414 | 0.935735 | 0.958114 |
| NDUFB3     | 2q33.1        | -0.00414 | 0.935772 | 0.958114 |
| NUP35      | 2q32.1        | 0.004102 | 0.936312 | 0.958603 |
| JOSD2      | 19q13.33      | -0.0041  | 0.936346 | 0.958603 |
| GATA2      | 3q21.3        | 0.00409  | 0.936496 | 0.958708 |
| MS4A12     | 11q12.2       | -0.00408 | 0.936715 | 0.958883 |
| VPS8       | 3q27.2        | 0.004049 | 0.93713  | 0.959124 |
| SYCP1      | 1p13.2        | 0.004047 | 0.937155 | 0.959124 |
| DSCR4      | 21q22.13      | -0.00405 | 0.937191 | 0.959124 |
| PKD1L3     | 16q22.2       | -0.00404 | 0.937243 | 0.959124 |
| SFTA2      | 6p21.33       | -0.00404 | 0.937253 | 0.959124 |
| PBX2       | 6p21.32       | 0.004038 | 0.937306 | 0.959124 |
| ZDHHC5     | 11q12.1       | 0.004035 | 0.937353 | 0.959124 |
| SIRT3      | 11p15.5       | 0.004032 | 0.937386 | 0.959124 |
| PNPLA2     | 11p15.5       | 0.004031 | 0.937406 | 0.959124 |
| TAF10      | 11p15.4       | -0.00403 | 0.937437 | 0.959124 |
| GMCL1      | 2p13.3        | 0.004027 | 0.937477 | 0.959124 |
| TAF1D      | 11q21         | 0.003992 | 0.938017 | 0.959627 |
| CBWD1      | 9p24.3        | -0.00397 | 0.938301 | 0.959868 |
| ALAS1      | 3p21.2        | -0.00396 | 0.938511 | 0.960034 |
| KIF19      | 17q25.1       | 0.003949 | 0.938679 | 0.960158 |
| ADGRA1     | 10q26.3       | 0.003942 | 0.938786 | 0.960201 |
| LY75       | 2q24.2        | -0.00394 | 0.938818 | 0.960201 |
| KIR3DL1    | 19q13.42      | 0.003928 | 0.939011 | 0.96035  |
| IKZF4      | 12q13.2       | 0.003916 | 0.939193 | 0.960487 |
| CACNA1F    | Xp11.23       | 0.003912 | 0.939252 | 0.960498 |
| TERB1      | 16q22.1       | 0.003908 | 0.939322 | 0.960521 |
| TMEM33     | 4p13          | 0.003896 | 0.939505 | 0.960659 |
| CST8       | 20p11.21      | 0.003874 | 0.939845 | 0.960958 |
| MRGPRG-AS1 | 11p15.4       | 0.003866 | 0.939961 | 0.961027 |
| AKAIN1     | 18p11.31      | -0.00386 | 0.940118 | 0.961139 |
| NBR2       | 17q21.31      | -0.00385 | 0.940169 | 0.961142 |
| PLEKHM1    | 17q21.31      | 0.003849 | 0.940236 | 0.961147 |
| FAM238B    | 10p12.1       | 0.003846 | 0.94027  | 0.961147 |
| GPAT3      | 4q21.23       | -0.00382 | 0.940723 | 0.961525 |
| CCDC28B    | 1p35.2        | -0.00382 | 0.940736 | 0.961525 |
| SLC13A1    | 7q31.32       | -0.0038  | 0.940952 | 0.961697 |
| EPG5       | 18q12.3-q21.1 | -0.00379 | 0.94118  | 0.961881 |
| KIAA1328   | 18q12.2       | 0.003781 | 0.94128  | 0.961934 |
| MRPL34     | 19p13.11      | 0.00377  | 0.941457 | 0.962065 |
| SSX9P      | Xp11.23       | 0.003741 | 0.941896 | 0.962457 |
| YBX3       | 12p13.2       | -0.00374 | 0.941951 | 0.962457 |
| SLPI       | 20q13.12      | 0.003736 | 0.941984 | 0.962457 |

|           |          |          |          |          |
|-----------|----------|----------|----------|----------|
| CDRT15    | 17p12    | -0.0037  | 0.942548 | 0.962984 |
| YTHDF1    | 20q13.33 | 0.003691 | 0.942682 | 0.963043 |
| EXOSC4    | 8q24.3   | -0.00369 | 0.942725 | 0.963043 |
| PODXL     | 7q32.3   | -0.00368 | 0.942859 | 0.963043 |
| KAT7      | 17q21.33 | 0.003675 | 0.942922 | 0.963043 |
| SCARB1    | 12q24.31 | -0.00367 | 0.942952 | 0.963043 |
| EPB42     | 15q15.2  | -0.00367 | 0.94297  | 0.963043 |
| OR2A25    | 7q35     | 0.003671 | 0.942988 | 0.963043 |
| OR6C1     | 12q13.2  | 0.003671 | 0.94299  | 0.963043 |
| STK39     | 2q24.3   | -0.00366 | 0.943166 | 0.963173 |
| FGF7P3    | 9p12     | -0.00364 | 0.943443 | 0.963407 |
| TSPOAP1   | 17q22    | -0.00363 | 0.943576 | 0.963494 |
| CST9L     | 20p11.21 | 0.00363  | 0.943629 | 0.963499 |
| NIF3L1    | 2q33.1   | 0.003621 | 0.943763 | 0.963546 |
| TRPC7     | 5q31.1   | -0.00362 | 0.943772 | 0.963546 |
| ORM2      | 9q32     | 0.003614 | 0.943878 | 0.963605 |
| IQCK      | 16p12.3  | 0.0036   | 0.944094 | 0.963776 |
| SULT1A2   | 16p11.2  | 0.003595 | 0.944164 | 0.963799 |
| ITSN1     | 21q22.11 | -0.00357 | 0.944561 | 0.964155 |
| LINC00964 | 8q24.13  | 0.003564 | 0.944654 | 0.9642   |
| OPN5      | 6p12.3   | 0.003544 | 0.944951 | 0.964455 |
| AQP3      | 9p13.3   | -0.00351 | 0.945526 | 0.964992 |
| SMAP2     | 1p34.2   | 0.0035   | 0.945643 | 0.965054 |
| BCL2L14   | 12p13.2  | 0.003497 | 0.945683 | 0.965054 |
| OR11G2    | 14q11.2  | -0.00348 | 0.945882 | 0.965208 |
| NAA11     | 4q21.21  | 0.00345  | 0.946411 | 0.965699 |
| ZRSR2     | Xp22.2   | 0.003446 | 0.946477 | 0.965717 |
| ZDHHC21   | 9p22.3   | -0.00344 | 0.946547 | 0.96574  |
| CDH4      | 20q13.33 | 0.003434 | 0.946667 | 0.965812 |
| SOX15     | 17p13.1  | -0.00343 | 0.946736 | 0.96583  |
| GSDMD     | 8q24.3   | 0.003426 | 0.946781 | 0.96583  |
| NKD2      | 5p15.33  | -0.00342 | 0.946854 | 0.965856 |
| LRTM1     | 3p14.3   | -0.00342 | 0.946921 | 0.965874 |
| ELFN2     | 22q13.1  | -0.0034  | 0.947138 | 0.966037 |
| WFDC5     | 20q13.12 | -0.0034  | 0.947176 | 0.966037 |
| ASB1      | 2q37.3   | 0.003397 | 0.947232 | 0.966044 |
| HLA-L     | 6p22.1   | 0.003386 | 0.947404 | 0.966126 |
| RALGAPA1  | 14q13.2  | 0.003386 | 0.947409 | 0.966126 |
| HOXC13    | 12q13.13 | 0.003377 | 0.94755  | 0.966222 |
| GPRC5A    | 12p13.1  | 0.003364 | 0.947746 | 0.966372 |
| FAF2      | 5q35.2   | -0.00336 | 0.947836 | 0.966372 |
| UROS      | 10q26.2  | -0.00336 | 0.947843 | 0.966372 |
| POTEG     | 14q11.2  | 0.003348 | 0.948002 | 0.966485 |
| MIEN1     | 17q12    | -0.00333 | 0.94832  | 0.96676  |
| UBE4A     | 11q23.3  | -0.00332 | 0.948504 | 0.966893 |
| BARHL2    | 1p22.2   | -0.00331 | 0.948547 | 0.966893 |
| HCAR2     | 12q24.31 | 0.003299 | 0.948761 | 0.967062 |
| FGD2      | 6p21.2   | -0.00329 | 0.948846 | 0.9671   |
| SNORA5B   | 7p13     | -0.00328 | 0.949008 | 0.967215 |
| ABCA5     | 17q24.3  | -0.00328 | 0.949108 | 0.967268 |
| TBL1XR1   | 3q26.32  | -0.00327 | 0.949249 | 0.967362 |
| CCNT2     | 2q21.3   | 0.003241 | 0.949659 | 0.967731 |
| TMEM11    | 17p11.2  | 0.003234 | 0.949773 | 0.967798 |
| NXF4      | Xq22.1   | 0.003223 | 0.949936 | 0.967915 |
| FKBP3     | 14q21.2  | 0.003217 | 0.950037 | 0.967924 |
| TBCA      | 5q14.1   | 0.003215 | 0.950053 | 0.967924 |
| XKRY2     | Yq11.222 | -0.00321 | 0.950121 | 0.967924 |
| GAL3ST3   | 11q13.1  | 0.003209 | 0.950147 | 0.967924 |

|           |                 |          |          |          |
|-----------|-----------------|----------|----------|----------|
| LRRC66    | 4q12            | -0.00321 | 0.950187 | 0.967924 |
| PLSCR2    | 3q24            | 0.003201 | 0.950277 | 0.967967 |
| PPP1CC    | 12q24.11        | -0.00319 | 0.950524 | 0.96817  |
| OR1L3     | 9q33.2          | -0.00318 | 0.950584 | 0.968181 |
| SLC22A3   | 6q25.3          | -0.00317 | 0.950821 | 0.968374 |
| PGA4      | 11q12.2         | 0.003161 | 0.950898 | 0.968402 |
| FADD      | 11q13.3         | -0.00314 | 0.951276 | 0.968738 |
| CFAP77    | 9q34.13         | -0.0031  | 0.95182  | 0.9692   |
| OR11H6    | 14q11.2         | 0.003098 | 0.951869 | 0.9692   |
| NXF2B     | Xq22.1          | 0.003096 | 0.951903 | 0.9692   |
| ACTA1     | 1q42.13         | 0.003095 | 0.951923 | 0.9692   |
| NXNL2     | 9q22.1          | -0.00309 | 0.951982 | 0.969211 |
| SLC16A14  | 2q36.3          | 0.003078 | 0.952191 | 0.969374 |
| GAGE13    | Xp11.23         | 0.003074 | 0.952246 | 0.969381 |
| PTGDR2    | 11q12.2         | -0.00306 | 0.952395 | 0.969461 |
| FLJ30679  | 16q24.1         | 0.00306  | 0.952469 | 0.969461 |
| C22ORF23  | 22q13.1         | 0.003057 | 0.952505 | 0.969461 |
| SLC12A7   | 5p15.33         | -0.00306 | 0.952518 | 0.969461 |
| NAXD      | 13q34           | 0.003047 | 0.952665 | 0.969558 |
| RNF10     | 12q24.31        | -0.00304 | 0.952725 | 0.969558 |
| SLC5A5    | 19p13.11        | -0.00304 | 0.952759 | 0.969558 |
| RUNX1-IT1 | 21q22.12        | 0.003038 | 0.952814 | 0.969564 |
| ZFAT-AS1  | 8q24.22         | -0.00302 | 0.95301  | 0.969679 |
| IL17RE    | 3p25.3          | 0.00302  | 0.953079 | 0.969679 |
| OR5F1     | 11q12.1         | -0.00302 | 0.953089 | 0.969679 |
| ABHD15    | 17q11.2         | 0.003018 | 0.953119 | 0.969679 |
| BTG3      | 21q21.1         | 0.002999 | 0.953417 | 0.969923 |
| ZDHHC13   | 11p15.1         | 0.002996 | 0.953457 | 0.969923 |
| RNASET2   | 6q27            | -0.00297 | 0.953874 | 0.970299 |
| C16ORF46  | 16q23.2         | -0.00295 | 0.954137 | 0.970516 |
| CEACAM16  | 19q13.31-q13.32 | -0.00295 | 0.954223 | 0.970526 |
| LOC646214 | 15q11.2         | 0.002941 | 0.954319 | 0.970526 |
| GCH1      | 14q22.2         | -0.00294 | 0.954345 | 0.970526 |
| PER4      | 7p21.3          | -0.00294 | 0.954353 | 0.970526 |
| CYB561A3  | 11q12.2         | 0.002936 | 0.954389 | 0.970526 |
| DRGX      | 10q11.23        | 0.002887 | 0.955157 | 0.971225 |
| POM121L4P | 22q11.21        | 0.002886 | 0.955173 | 0.971225 |
| NRG1      | 8p12            | 0.002882 | 0.955232 | 0.971236 |
| FBXO47    | 17q12 17q12     | -0.00288 | 0.955334 | 0.971291 |
| CLEC2D    | 12p13.31        | 0.002868 | 0.955451 | 0.97136  |
| INTS9     | 8p21.1          | 0.002864 | 0.955505 | 0.971365 |
| GRB7      | 17q12           | -0.00283 | 0.956063 | 0.971883 |
| LMOD2     | 7q31.32         | -0.00282 | 0.956118 | 0.97189  |
| CUL7      | 6p21.1          | -0.00282 | 0.95622  | 0.971912 |
| SUCLG1    | 2p11.2          | -0.00282 | 0.956236 | 0.971912 |
| OSR2      | 8q22.2          | 0.002798 | 0.956524 | 0.972154 |
| NKX6-1    | 4q21.23         | 0.002789 | 0.956664 | 0.972239 |
| FAM171A1  | 10p13           | -0.00279 | 0.956704 | 0.972239 |
| RYR3      | 15q13.3-q14     | -0.00278 | 0.956833 | 0.97232  |
| CISD3     | 17q12           | 0.002763 | 0.957072 | 0.972446 |
| GSDMC     | 8q24.21         | -0.00276 | 0.957091 | 0.972446 |
| SPG21     | 15q22.31        | -0.00276 | 0.957102 | 0.972446 |
| LOC388242 | 16p11.2         | -0.00276 | 0.957162 | 0.972457 |
| TEX38     | 1p33            | 0.002735 | 0.957512 | 0.972686 |
| BCO1      | 16q23.2         | -0.00273 | 0.957563 | 0.972686 |
|           | 4-Mar 2q35      | 0.002731 | 0.957568 | 0.972686 |
| KTI12     | 1p32.3          | -0.00273 | 0.957586 | 0.972686 |
| MAPK1     | 22q11.22        | -0.00272 | 0.95771  | 0.972686 |

|           |                |          |          |          |
|-----------|----------------|----------|----------|----------|
| ZNF804B   | 7q21.13        | 0.002722 | 0.957716 | 0.972686 |
| VAMP7     | Xq28 and Yq12  | 0.002721 | 0.957727 | 0.972686 |
| AHDC1     | 1p36.11-p35.3  | 0.002708 | 0.957924 | 0.972837 |
| LINC01734 | 20q12          | -0.00269 | 0.958246 | 0.973094 |
| SLC6A16   | 19q13.33       | 0.002686 | 0.958275 | 0.973094 |
| KCNK10    | 14q31.3        | 0.002682 | 0.95833  | 0.973101 |
| CLIP2     | 7q11.23        | 0.002674 | 0.958462 | 0.973186 |
| LINC00161 | 21q21.3        | 0.002663 | 0.958633 | 0.973304 |
| MRPL42    | 12q22          | -0.00266 | 0.958676 | 0.973304 |
| FOXN3-AS2 | 14q32.11       | 0.002654 | 0.958765 | 0.973306 |
| KRTAP5-11 | 11q13.4        | -0.00265 | 0.958774 | 0.973306 |
| IRAK1BP1  | 6q14.1         | 0.002636 | 0.95904  | 0.973526 |
| SMIM4     | 3p21.1         | 0.002631 | 0.959127 | 0.973565 |
| HTR1A     | 5q12.3         | -0.00263 | 0.959182 | 0.973571 |
| MC1R      | 16q24.3        | -0.00261 | 0.959511 | 0.973856 |
| LINC02112 | 5p15.31-p15.2  | -0.00258 | 0.959901 | 0.974203 |
| TMEM225   | 11q24.1        | -0.00257 | 0.960043 | 0.974281 |
| ATF7IP2   | 16p13.2-p13.13 | 0.00257  | 0.960076 | 0.974281 |
| OR51G1    | 11p15.4        | -0.00256 | 0.960299 | 0.974459 |
| ANKRD42   | 11q14.1        | -0.00254 | 0.96047  | 0.974536 |
| TRAPPC5   | 19p13.2        | 0.002542 | 0.96051  | 0.974536 |
| RHO       | 3q22.1         | 0.00254  | 0.960536 | 0.974536 |
| CDC40     | 6q21           | -0.00253 | 0.960681 | 0.974536 |
| TECRL     | 4q13.1         | -0.00253 | 0.96072  | 0.974536 |
| LRP10     | 14q11.2        | -0.00253 | 0.960744 | 0.974536 |
| NAIF1     | 9q34.11        | -0.00253 | 0.960758 | 0.974536 |
| CMPK2     | 2p25.2         | 0.002524 | 0.960778 | 0.974536 |
| LHFPL4    | 3p25.3         | 0.002522 | 0.960813 | 0.974536 |
| RFX5      | 1q21.3         | -0.00251 | 0.960961 | 0.974637 |
| ELF4      | Xq26.1         | 0.002501 | 0.961135 | 0.974726 |
| ETFA      | 15q24.2-q24.3  | 0.002498 | 0.961185 | 0.974726 |
| FMNL2     | 2q23.3         | 0.002498 | 0.961195 | 0.974726 |
| DCBLD1    | 6q22.1         | -0.00249 | 0.961309 | 0.974792 |
| C1ORF158  | 1p36.21        | 0.002486 | 0.96137  | 0.974804 |
| ASB15     | 7q31.32        | -0.00248 | 0.961469 | 0.974813 |
| FAH       | 15q25.1        | -0.00247 | 0.96155  | 0.974813 |
| LINC01128 | 1p36.33        | 0.002474 | 0.961566 | 0.974813 |
| SEC13     | 3p25.3         | 0.002473 | 0.961573 | 0.974813 |
| SOX14     | 3q22.3         | 0.002443 | 0.962047 | 0.975243 |
| LINC00636 | 3q13.12        | -0.00243 | 0.962196 | 0.975335 |
| ZP3       | 7q11.23        | 0.002431 | 0.962235 | 0.975335 |
| DEF6      | 6p21.31        | -0.0024  | 0.962713 | 0.97577  |
| FAM9C     | Xp22.2         | 0.002395 | 0.962783 | 0.975792 |
| FAM183A   | 1p34.2         | -0.00238 | 0.963072 | 0.975992 |
| RABL2B    | 22q13.33       | 0.002376 | 0.963077 | 0.975992 |
| BPIFB1    | 20q11.21       | -0.00236 | 0.9633   | 0.976168 |
| BLID      | 11q24.1        | 0.002357 | 0.963377 | 0.976197 |
| CD46      | 1q32.2         | 0.002339 | 0.963655 | 0.976429 |
| PBRM1     | 3p21.1         | -0.00232 | 0.964003 | 0.976732 |
| NEUROD4   | 12q13.2        | -0.00231 | 0.964153 | 0.976834 |
| TGM6      | 20p13          | -0.0023  | 0.96429  | 0.976924 |
| TSPY2     | Yp11.2         | 0.00229  | 0.964415 | 0.977001 |
| KHDC1     | 6q13           | -0.00228 | 0.964528 | 0.977064 |
| MEGF8     | 19q13.2        | 0.00228  | 0.964575 | 0.977064 |
| FAM9B     | Xp22.31        | 0.002265 | 0.964804 | 0.977247 |
| CYP4Z1    | 1p33           | 0.002247 | 0.965085 | 0.977482 |
| SAR1B     | 5q31.1         | 0.002239 | 0.965215 | 0.977564 |
| WARS      | 14q32.2        | -0.00223 | 0.965293 | 0.977594 |

|           |                 |          |          |          |
|-----------|-----------------|----------|----------|----------|
| CBFA2T2   | 20q11.21-q11.22 | 0.00222  | 0.965507 | 0.977762 |
| LETMD1    | 12q13.12        | -0.00219 | 0.966005 | 0.978217 |
| SCRT2     | 20p13           | 0.00218  | 0.966127 | 0.978242 |
| GAS6      | 13q34           | 0.002175 | 0.966203 | 0.978242 |
| LINC01600 | 6p25.2          | 0.002174 | 0.966221 | 0.978242 |
| NAT9      | 17q25.1         | 0.002174 | 0.966226 | 0.978242 |
| MYCNOS    | 2p24.3          | 0.002168 | 0.966316 | 0.978284 |
| MEMO1     | 2p22.3          | 0.00216  | 0.96643  | 0.97835  |
| SNCB      | 5q35.2          | 0.002147 | 0.96664  | 0.978513 |
| ATP8A1    | 4p13            | 0.002135 | 0.966824 | 0.97865  |
| GUSB      | 7q11.21         | -0.00213 | 0.966968 | 0.978739 |
| CYB5D1    | 17p13.1         | 0.002123 | 0.967012 | 0.978739 |
| ZMAT1     | Xq22.1          | -0.00212 | 0.967059 | 0.978739 |
| OR10A3    | 11p15.4         | 0.002111 | 0.96719  | 0.978806 |
| AKAP9     | 7q21.2          | -0.00211 | 0.967222 | 0.978806 |
| TPRXL     | 3p25.1          | -0.0021  | 0.967416 | 0.978952 |
| PAIP2B    | 2p13.3          | -0.00209 | 0.967476 | 0.978964 |
| NBPF1     | 1p36.13         | 0.002082 | 0.96765  | 0.97909  |
| PRG2      | 11q12.1         | 0.002064 | 0.96793  | 0.979324 |
| FITM1     | 14q12           | 0.002036 | 0.968359 | 0.979652 |
| C7ORF61   | 7q22.1          | -0.00203 | 0.9684   | 0.979652 |
| PRAMEF18  | 1p36.21         | -0.00203 | 0.968401 | 0.979652 |
| PCYOX1L   | 5q32            | -0.00201 | 0.96874  | 0.979913 |
| PACC1     | 1q32.3          | -0.00201 | 0.968757 | 0.979913 |
| DEFB109B  | 8p23.1          | 0.002005 | 0.968845 | 0.979934 |
| HPS3      | 3q24            | 0.002002 | 0.968891 | 0.979934 |
| CEP126    | 11q22.1         | -0.002   | 0.968924 | 0.979934 |
| PDZD9     | 16p12.2         | -0.002   | 0.968974 | 0.979934 |
| CEP44     | 4q34.1          | 0.001979 | 0.969245 | 0.980159 |
| LAG3      | 12p13.31        | -0.00197 | 0.969349 | 0.980214 |
| LGR6      | 1q32.1          | -0.00196 | 0.969566 | 0.980385 |
| FSD1      | 19p13.3         | 0.001952 | 0.96967  | 0.98044  |
| OR8K3     | 11q12.1         | -0.00195 | 0.969772 | 0.980494 |
| SELENON   | 1p36.11         | -0.00194 | 0.969877 | 0.980551 |
| PWWP2A    | 5q33.3          | -0.00193 | 0.969934 | 0.980559 |
| ZNF292    | 6q14.3          | -0.00192 | 0.970205 | 0.980765 |
| OR8S1     | 12q13.11        | -0.00192 | 0.970236 | 0.980765 |
| SYCE1L    | 16q23.1         | 0.001895 | 0.970552 | 0.981035 |
| PIKFYVE   | 2q34            | 0.001883 | 0.970733 | 0.981168 |
| SPANXN5   | Xp11.22         | 0.001855 | 0.971178 | 0.981569 |
| RIC8B     | 12q23.3         | -0.00182 | 0.971723 | 0.98207  |
| DPP7      | 9q34.3          | -0.00182 | 0.971793 | 0.982091 |
| FBXO16    | 8p21.1          | 0.001806 | 0.971933 | 0.982183 |
| URI1      | 19q12           | -0.00179 | 0.972161 | 0.982321 |
| APOOL     | Xq21.1          | -0.00179 | 0.972168 | 0.982321 |
| SOX2      | 3q26.33         | -0.00176 | 0.972602 | 0.98271  |
| AADAC     | 3q25.1          | 0.001747 | 0.972849 | 0.982911 |
| LINC00671 | 17q21.31        | -0.00173 | 0.973046 | 0.983059 |
| TEX13A    | Xq22.3          | -0.00173 | 0.973177 | 0.983143 |
| LRRC36    | 16q22.1         | 0.001705 | 0.973504 | 0.983423 |
| OTOP2     | 17q25.1         | -0.0017  | 0.973565 | 0.983435 |
| ITFG2     | 12p13.33        | 0.001697 | 0.973629 | 0.98345  |
| SMNDC1    | 10q25.2         | 0.001693 | 0.973693 | 0.983465 |
| AHSA1     | 14q24.3         | -0.00169 | 0.973811 | 0.983535 |
| OR52L1    | 11p15.4         | -0.00168 | 0.973875 | 0.98355  |
| C1QL1     | 17q21.31        | 0.001672 | 0.97401  | 0.983637 |
| CDX2      | 13q12.2         | 0.001657 | 0.974251 | 0.983831 |
| WDYHV1    | 8q24.13         | 0.001642 | 0.974475 | 0.984007 |

|           |          |          |          |          |
|-----------|----------|----------|----------|----------|
| NHLRC3    | 13q13.3  | -0.00164 | 0.974586 | 0.984069 |
| PCID2     | 13q34    | -0.00163 | 0.974662 | 0.984097 |
| NMS       | 2q11.2   | 0.001626 | 0.97473  | 0.984115 |
| MMP12     | 11q22.2  | -0.00162 | 0.97486  | 0.984197 |
| GCM2      | 6p24.2   | 0.001596 | 0.975191 | 0.984482 |
| KEL       | 7q34     | 0.001591 | 0.975268 | 0.984509 |
| FBXW8     | 12q24.22 | -0.00158 | 0.975402 | 0.984595 |
| DAPK3     | 19p13.3  | -0.00156 | 0.975713 | 0.984859 |
| REG1A     | 2p12     | 0.001558 | 0.97578  | 0.984877 |
| PGA3      | 11q12.2  | 0.00154  | 0.976062 | 0.985112 |
| PROP1     | 5q35.3   | -0.00154 | 0.97611  | 0.985112 |
| GABRB1    | 4p12     | 0.001532 | 0.976191 | 0.985144 |
| DHDDS     | 1p36.11  | 0.001505 | 0.976609 | 0.985516 |
| CEACAM8   | 19q13.2  | 0.001497 | 0.97674  | 0.985598 |
| NPPC      | 2q37.1   | 0.001466 | 0.977217 | 0.985988 |
| KBTBD12   | 3q21.3   | 0.001465 | 0.977225 | 0.985988 |
| EIF3G     | 19p13.2  | -0.00146 | 0.977368 | 0.986083 |
| FAM106A   | 17p11.2  | 0.001446 | 0.977533 | 0.98617  |
| RPS6KA5   | 14q32.11 | 0.001444 | 0.977552 | 0.98617  |
| LINC00467 | 1q32.3   | 0.001426 | 0.97784  | 0.986363 |
| PIK3R4    | 3q22.1   | 0.001423 | 0.97788  | 0.986363 |
| LINC00589 | 8p12     | -0.00142 | 0.977892 | 0.986363 |
| TNFAIP2   | 14q32.32 | -0.00142 | 0.97797  | 0.986363 |
| RABEP2    | 16p11.2  | -0.00142 | 0.97799  | 0.986363 |
| OR52A5    | 11p15.4  | -0.0014  | 0.978281 | 0.986607 |
| IQSEC2    | Xp11.22  | 0.001386 | 0.978465 | 0.986616 |
| RPS6KA3   | Xp22.12  | -0.00138 | 0.978509 | 0.986616 |
| DHX32     | 10q26.2  | 0.001382 | 0.978526 | 0.986616 |
| HCAR3     | 12q24.31 | -0.00138 | 0.978559 | 0.986616 |
| RGL3      | 19p13.2  | -0.00138 | 0.978582 | 0.986616 |
| ZCCHC7    | 9p13.2   | 0.001378 | 0.978586 | 0.986616 |
| NR5A1     | 9q33.3   | 0.001367 | 0.978753 | 0.986696 |
| SRA1      | 5q31.3   | -0.00136 | 0.978793 | 0.986696 |
| WDR92     | 2p14     | -0.00136 | 0.978855 | 0.986696 |
| LINC02610 | 2q37.3   | 0.00136  | 0.978862 | 0.986696 |
| PARP15    | 3q21.1   | 0.001355 | 0.97894  | 0.986702 |
| USH2A     | 1q41     | -0.00135 | 0.978967 | 0.986702 |
| CACNG2    | 22q12.3  | -0.00132 | 0.979483 | 0.987173 |
| TMEM62    | 15q15.2  | -0.0013  | 0.979847 | 0.987432 |
| NHLRC1    | 6p22.3   | 0.001294 | 0.979884 | 0.987432 |
| SLC25A13  | 7q21.3   | 0.001294 | 0.979889 | 0.987432 |
| STK38     | 6p21.31  | 0.001287 | 0.979991 | 0.987485 |
| ZNF84     | 12q24.33 | -0.00128 | 0.980068 | 0.987513 |
| PTS       | 11q23.1  | 0.00127  | 0.980258 | 0.987598 |
| CTAGE10P  | 13q14.2  | -0.00127 | 0.980307 | 0.987598 |
| ELOF1     | 19p13.2  | 0.001266 | 0.980322 | 0.987598 |
| FER1L5    | 2q11.2   | -0.00126 | 0.980348 | 0.987598 |
| VPS13C    | 15q22.2  | 0.001255 | 0.980492 | 0.987667 |
| PLEKHA8P1 | 12q12    | -0.00125 | 0.980516 | 0.987667 |
| OR1L6     | 9q33.2   | -0.00124 | 0.980775 | 0.987879 |
| SNORA54   | 11p15.4  | -0.00123 | 0.980866 | 0.98792  |
| UPK1B     | 3q13.32  | 0.001224 | 0.980976 | 0.987982 |
| NCS1      | 9q34.11  | -0.00121 | 0.981118 | 0.988075 |
| CGAS      | 6q13     | 0.001209 | 0.981215 | 0.988123 |
| LINC00158 | 21q21.2  | 0.00119  | 0.981505 | 0.988318 |
| SPINK5    | 5q32     | -0.00119 | 0.981539 | 0.988318 |
| REL       | 2p16.1   | 0.001186 | 0.98157  | 0.988318 |
| DSCR10    | 21q22.13 | -0.00118 | 0.981606 | 0.988318 |

|            |               |          |          |          |
|------------|---------------|----------|----------|----------|
| OR2W3      | 1q44          | -0.00117 | 0.981856 | 0.988513 |
| OR13C3     | 9q31.1        | 0.001161 | 0.981948 | 0.988513 |
| MS4A5      | 11q12.2       | -0.00116 | 0.981948 | 0.988513 |
| ANKRD36BP2 | 2p11.2        | -0.00116 | 0.982043 | 0.988559 |
| AK8        | 9q34.13       | -0.00115 | 0.982105 | 0.988571 |
| GNA14      | 9q21.2        | -0.00113 | 0.982362 | 0.988781 |
| FOXD2      | 1p33          | -0.00113 | 0.982466 | 0.988836 |
| WARS2      | 1p12          | -0.00111 | 0.982797 | 0.989119 |
| HNF1B      | 17q12         | 0.001075 | 0.983299 | 0.989574 |
| DAOA       | 13q33.2 13q34 | 0.001066 | 0.983431 | 0.989658 |
| TMPRSS11B  | 4q13.2        | 0.001052 | 0.983643 | 0.989821 |
| ZNF132     | 19q13.43      | 0.001011 | 0.984293 | 0.990425 |
| SLC52A3    | 20p13         | -0.00099 | 0.984574 | 0.990658 |
| JUND       | 19p13.11      | 0.000965 | 0.984999 | 0.991036 |
| OR2A14     | 7q35          | -0.00096 | 0.985097 | 0.991085 |
| LILRP2     | 19q13.42      | 0.000951 | 0.985221 | 0.99116  |
| GALNT3     | 2q24.3        | -0.00093 | 0.9855   | 0.991391 |
| PDIA4      | 7q36.1        | -0.00093 | 0.985601 | 0.991433 |
| A1CF       | 10q11.23      | -0.00092 | 0.985641 | 0.991433 |
| PSG8       | 19q13.2       | 0.000904 | 0.985954 | 0.991698 |
| NIT2       | 3q12.2        | -0.0009  | 0.986056 | 0.991749 |
| KRTAP5-3   | 11p15.5       | -0.00089 | 0.986142 | 0.991749 |
| GPBP1      | 5q11.2        | 0.000891 | 0.986153 | 0.991749 |
| ZNF285     | 19q13.31      | 0.000882 | 0.986292 | 0.991808 |
| RPL13AP6   | 10q25.2       | -0.00088 | 0.98638  | 0.991808 |
| ABL1       | 9q34.12       | 0.000875 | 0.986407 | 0.991808 |
| SSC4D      | 7q11.23       | 0.000874 | 0.98641  | 0.991808 |
| FAM66A     | 8p23.1        | 0.000869 | 0.9865   | 0.991848 |
| CLEC18C    | 16q22.1       | 0.000864 | 0.986572 | 0.991872 |
| LRRC69     | 8q21.3        | 0.000858 | 0.986665 | 0.991915 |
| KHDC3L     | 6q13          | 0.000849 | 0.986804 | 0.991959 |
| CT45A3     | Xq26.3        | 0.000847 | 0.986839 | 0.991959 |
| ZC3H14     | 14q31.3       | -0.00084 | 0.986872 | 0.991959 |
| OR5H2      | 3q11.2        | -0.00084 | 0.986924 | 0.991959 |
| CLDN18     | 3q22.3        | -0.00084 | 0.986956 | 0.991959 |
| CXORF49B   | Xq13.1        | 0.000832 | 0.987063 | 0.992017 |
| ZNF611     | 19q13.41      | -0.00081 | 0.987468 | 0.992373 |
| AP5B1      | 11q13.1       | 0.000802 | 0.987538 | 0.992378 |
| GDF9       | 5q31.1        | 0.0008   | 0.987571 | 0.992378 |
| LINC00667  | 18p11.31      | -0.0008  | 0.987632 | 0.992389 |
| RASL10A    | 22q12.2       | -0.00079 | 0.98777  | 0.992478 |
| CYP4F3     | 19p13.12      | 0.000781 | 0.987856 | 0.992514 |
| NSUN4      | 1p33          | -0.00078 | 0.987916 | 0.992525 |
| PDE6C      | 10q23.33      | -0.00077 | 0.987991 | 0.992551 |
| DTD1       | 20p11.23      | -0.00075 | 0.988398 | 0.992909 |
| LSM8       | 7q31.31       | 0.000719 | 0.988829 | 0.993077 |
| ACTRT2     | 1p36.32       | -0.0007  | 0.989168 | 0.993077 |
| RBMY1A3P   | Yp11.2        | -0.0007  | 0.989168 | 0.993077 |
| FAM197Y2   | Yp11.2        | -0.0007  | 0.989168 | 0.993077 |
| TFAP2D     | 6p12.3        | -0.0007  | 0.989168 | 0.993077 |
| KRTAP20-4  | 21q22.11      | -0.0007  | 0.989168 | 0.993077 |
| P2RX6P     | 22q11.21      | 0.000697 | 0.989168 | 0.993077 |
| TSPY4      | Yp11.2        | -0.0007  | 0.989168 | 0.993077 |
| CBLL2      | Xp22.11       | -0.0007  | 0.989168 | 0.993077 |
| DEFB107A   | 8p23.1        | -0.0007  | 0.989168 | 0.993077 |
| PRAMEF22   | 1p36.21       | -0.0007  | 0.989168 | 0.993077 |
| DPPA5      | 6q13          | 0.000696 | 0.989183 | 0.993077 |
| TAS2R39    | 7q34          | 0.000694 | 0.989209 | 0.993077 |

|              |          |          |          |          |
|--------------|----------|----------|----------|----------|
| KCNA10       | 1p13.3   | -0.00068 | 0.989396 | 0.993164 |
| CLK1         | 2q33.1   | 0.000679 | 0.989445 | 0.993164 |
| NCSTN        | 1q23.2   | 0.000679 | 0.989445 | 0.993164 |
| AVPR1B       | 1q32.1   | -0.00067 | 0.989612 | 0.993261 |
| LINC01553    | 10q21.2  | 0.000667 | 0.989641 | 0.993261 |
| C2ORF83      | 2q36.3   | -0.00065 | 0.989932 | 0.993503 |
| CFD          | 19p13.3  | -0.00063 | 0.990194 | 0.993717 |
| RESP18       | 2q35     | -0.00062 | 0.990352 | 0.993826 |
| SLC38A8      | 16q23.3  | 0.000598 | 0.990702 | 0.994117 |
| RAB41        | Xq13.1   | -0.0006  | 0.990742 | 0.994117 |
| KCNG2        | 18q23    | -0.00059 | 0.990904 | 0.99423  |
| PSMD9        | 12q24.31 | -0.00058 | 0.991048 | 0.994283 |
| SAA4         | 11p15.1  | 0.000575 | 0.991056 | 0.994283 |
| PLA2G10      | 16p13.12 | 0.000554 | 0.991382 | 0.994498 |
| NDUFS5       | 1p34.3   | 0.000553 | 0.991412 | 0.994498 |
| HEATR5A      | 14q12    | 0.00055  | 0.991446 | 0.994498 |
| DNAH12       | 3p14.3   | 0.000548 | 0.991475 | 0.994498 |
| CSN2         | 4q13.3   | 0.000546 | 0.991519 | 0.994498 |
| SEMA3F       | 3p21.31  | 0.000532 | 0.991724 | 0.994654 |
| C2ORF27B     | 2q21.2   | 0.000515 | 0.992003 | 0.994884 |
| RNF126P1     | 17q22    | -0.0005  | 0.992154 | 0.994981 |
| SNX22        | 15q22.31 | 0.000502 | 0.992199 | 0.994981 |
| SLC12A1      | 15q21.1  | -0.00048 | 0.992499 | 0.995232 |
| DCAF4        | 14q24.2  | 0.000479 | 0.99255  | 0.995234 |
| OAS2         | 12q24.13 | 0.000472 | 0.99267  | 0.995304 |
| PLA2G4A      | 1q31.1   | -0.00047 | 0.992757 | 0.995342 |
| FAM27E5      | 17p11.2  | 0.000454 | 0.992942 | 0.995477 |
| HTN3         | 4q13.3   | 0.00043  | 0.993314 | 0.995743 |
| FAM98A       | 2p22.3   | 0.000429 | 0.993336 | 0.995743 |
| VPS16        | 20p13    | 0.000425 | 0.9934   | 0.995743 |
| CRB2         | 9q33.3   | 0.000424 | 0.993407 | 0.995743 |
| FKBP8        | 19p13.11 | -0.00041 | 0.993704 | 0.995946 |
| ALG9         | 11q23.1  | 0.000402 | 0.993745 | 0.995946 |
| SPRYD7       | 13q14.2  | -0.0004  | 0.993778 | 0.995946 |
| RPS24        | 10q22.3  | 0.000396 | 0.993838 | 0.995946 |
| LOC100130331 | 1q43     | 0.000393 | 0.993895 | 0.995946 |
| GP9          | 3q21.3   | 0.000392 | 0.993907 | 0.995946 |
| EXOSC1       | 10q24.1  | 0.000385 | 0.994016 | 0.995992 |
| EFCAB8       | 20q11.21 | -0.00038 | 0.994053 | 0.995992 |
| KIAA0895     | 7p14.2   | 0.000378 | 0.994123 | 0.996012 |
| TTY9B        | Yq11.222 | -0.00037 | 0.994174 | 0.996014 |
| FBP1         | 9q22.32  | 0.000359 | 0.99442  | 0.996211 |
| NME2         | 17q21.33 | 0.000322 | 0.994989 | 0.996731 |
| SNORA16A     | 1p35.3   | 0.000313 | 0.995128 | 0.99682  |
| MTLN         | 2q13     | 0.000309 | 0.99519  | 0.996833 |
| SLC16A11     | 17p13.1  | 0.000299 | 0.995351 | 0.996888 |
| CDHR1        | 10q23.1  | 0.000298 | 0.995374 | 0.996888 |
| WFDC6        | 20q13.12 | -0.0003  | 0.995395 | 0.996888 |
| ANXA2R       | 5p12     | 0.000287 | 0.995545 | 0.996988 |
| RTL4         | Xq23     | -0.00028 | 0.995633 | 0.997027 |
| PHACTR2      | 6q24.2   | -0.00027 | 0.995789 | 0.997133 |
| NLN          | 5q12.3   | -0.00027 | 0.995873 | 0.997167 |
| SYTL2        | 11q14.1  | 0.000244 | 0.996207 | 0.997413 |
| COQ6         | 14q24.3  | 0.000243 | 0.996217 | 0.997413 |
| TRMO         | 9q22.33  | -0.00024 | 0.996316 | 0.997461 |
| DDX50        | 10q22.1  | -0.00022 | 0.996518 | 0.997614 |
| INPP5J       | 22q12.2  | 0.000208 | 0.996759 | 0.997806 |
| FAM120C      | Xp11.22  | 0.000202 | 0.996856 | 0.997853 |



|           |          |          |          |          |
|-----------|----------|----------|----------|----------|
| SLC35E1   | 19p13.11 | 0.000197 | 0.99694  | 0.997887 |
| PEX11B    | 1q21.1   | 0.000191 | 0.997034 | 0.997931 |
| TRIM16    | 17p12    | 0.000176 | 0.997265 | 0.998101 |
| LAIR2     | 19q13.42 | 0.000173 | 0.997304 | 0.998101 |
| BCL2L2    | 14q11.2  | -0.00015 | 0.997603 | 0.99835  |
| TMSB4Y    | Yq11.221 | -0.00015 | 0.997709 | 0.998374 |
| HIST2H4A  | 1q21.2   | 0.000144 | 0.997763 | 0.998374 |
| LRRIQ1    | 12q21.31 | 0.000143 | 0.997776 | 0.998374 |
| ATP10B    | 5q34     | 0.000129 | 0.997997 | 0.998546 |
| SPATA31A3 | 9q21.11  | -0.00012 | 0.998188 | 0.998669 |
| RIIAD1    | 1q21.3   | 0.000114 | 0.998221 | 0.998669 |
| PEBP1     | 12q24.23 | 0.000101 | 0.998436 | 0.998835 |
| LAT       | 16p11.2  | #####    | 0.998503 | 0.998852 |
| LCE3C     | 1q21.3   | #####    | 0.99861  | 0.99891  |
| CLDN8     | 21q22.11 | 7.48E-05 | 0.998837 | 0.999087 |
| PUDP      | Xp22.31  | 6.00E-05 | 0.999068 | 0.999268 |
| DSG4      | 18q12.1  | 4.76E-05 | 0.999261 | 0.999367 |
| SAA2      | 11p15.1  | 4.71E-05 | 0.999267 | 0.999367 |
| SURF4     | 9q34.2   | #####    | 0.999403 | 0.999453 |
| PCM1      | 8p22     | 3.09E-05 | 0.99952  | 0.99952  |
